# Supplementary material
Source: PubMed Central journal article supplement (PMC4592476)
Supplement: NIHMS715462-supplement-1.pdf [file NIHMS715462-supplement-1.pdf]

**Supplemental Table 1.** Basic patients characteristics of the cohort used for serum HGF measurements.

| SAMPLE | DIAGNOSIS       | DISEASE STATUS | GENDER | RACE | AGE | FUNCTIONAL STATUS* |
|--------|-----------------|----------------|--------|------|-----|--------------------|
| 1      | Healthy Control | No Cancer      | F      | W    |     | N/A                |
| 2      | Healthy Control | No Cancer      | F      | W    |     | N/A                |
| 3      | Healthy Control | No Cancer      | M      | H    |     | N/A                |
| 4      | Healthy Control | No Cancer      | M      | W    |     | N/A                |
| 5      | Healthy Control | No Cancer      | M      | H    |     | N/A                |
| 6      | Healthy Control | No Cancer      | F      | H    |     | N/A                |
| 7      | Healthy Control | No Cancer      | F      | H    |     | N/A                |
| 8      | ACC             | DM             | F      | W    |     | 1,3                |
| 9      | ACC             | DM             | M      | H    |     | 0                  |
| 10     | ACC             | Preop          | F      | W    |     | 1                  |
| 11     | ACC             | DM             | F      | W    |     | 1                  |
| 12     | ACC             | DM             | M      | H    |     | 1                  |
| 13     | ACC             | DM             | M      | W    |     | 0                  |
| 14     | ACC             | DM             | M      | W    |     | 0                  |
| 15     | ACC             | DM             | F      | W    |     | 0                  |
| 16     | ACC             | DM             | F      | W    |     | 1                  |
| 17     | ACC             | DM             | F      | W    |     | 1,3                |
| 18     | ACC             | DM             | M      | H    |     | 0                  |
| 19     | ACC             | DM             | F      | W    |     | 1,3                |
| 20     | ACC             | DM             | M      | W    |     | 2                  |
| 21     | ACC             | DM             | M      | A    |     | 0                  |
| 22     | ACC             | DM             | F      | W    |     | 1                  |
| 23     | ACC             | DM             | F      | W    |     | 3                  |
| 24     | ACC             | DM             | F      | W    |     | 1,3                |
| 25     | ACC             | DM             | M      | W    |     | 0                  |
| 26     | ACC             | DM             | F      | W    |     | 0                  |
| 27     | ACC             | DM             | F      | W    |     | 1,3                |
| 28     | ACC             | DM             | M      | H    |     | 1                  |
| 29     | ACC             | DM             | F      | B    |     | 3                  |

\* Functional Status (0: Non functioning, 1: Cortisol, 2 Aldosterone, 3, Androgens), DM: Distal metastasis

**Supplemental Table 2.** Basic patients characteristics of second TMA.

| SAMPLE | DIAGNOSIS | GENDER | AGE AT DIAGNOSIS | HORMONAL STATUS | FIRST SURGERY | TUMOR SIZE | STAGE | WEISS SCORE | RESECTION MARGIN | ADJUVANT MITOTANE | STATUS AT FOLLOW-UP |
|--------|-----------|--------|------------------|-----------------|---------------|------------|-------|-------------|------------------|-------------------|---------------------|
| 1      | Adenoma   | F      | 49               | NF              | lap           | 2.2        | NA    | 0           | NA               | NA                | Alive               |
| 2      | Adenoma   | M      | 72               | FC              | lap           | 2.5        | NA    | 0           | NA               | NA                | Alive               |
| 3      | Adenoma   | F      | 35               | FC              | lap           | 4          | NA    | 0           | NA               | NA                | Alive               |
| 4      | Adenoma   | M      | 55               | NF              | open          | 9          | NA    | 0           | NA               | NA                | Alive               |
| 5      | Adenoma   | M      | 50               | NF              | open          | 4.4        | NA    | 0           | NA               | NA                | Alive               |
| 6      | Adenoma   | M      | 51               | NF              | lap           | 2.2        | NA    | 0           | NA               | NA                | Alive               |
| 7      | Adenoma   | F      | 48               | NF              | lap           | 3          | NA    | 0           | NA               | NA                | Alive               |
| 8      | Adenoma   | M      | 51               | NF              | lap           | 2.5        | NA    | 0           | NA               | NA                | Alive               |
| 9      | Adenoma   | F      | 51               | NF              | lap           | 3          | NA    | 0           | NA               | NA                | Alive               |
| 10     | Adenoma   | M      | 47               | NF              | lap           | 2.1        | NA    | 0           | NA               | NA                | Alive               |
| 11     | Adenoma   | M      | 69               | NF              | lap           | 2.2        | NA    | 0           | NA               | NA                | Alive               |
| 12     | Adenoma   | M      | 49               | NF              | open          | 6          | NA    | 0           | NA               | NA                | Alive               |
| 13     | Adenoma   | F      | 82               | NF              | lap           | 4.2        | NA    | 0           | NA               | NA                | Alive               |
| 14     | Adenoma   | F      | 49               | NF              | lap           | 3.2        | NA    | 0           | NA               | NA                | Alive               |
| 15     | Adenoma   | M      | 33               | NF              | open          | 4          | NA    | 0           | NA               | NA                | Alive               |
| 1      | ACC-Naive | F      | 56               | FC              | open          | 8          | 2     | 5           | R0               | No                | Alive               |
| 2      | ACC-Naive | F      | 53               | FC              | open          | 6.5        | 2     | 8           | Rx               | Yes               | Dead                |
| 3      | ACC-Naive | F      | 51               | FS              | open          | 10         | 2     | 8           | Rx               | Yes               | Alive               |
| 4      | ACC-Naive | M      | 79               | FA              | open          | 9          | 2     | 6           | R0               | No                | Dead                |
| 5      | ACC-Naive | F      | 28               | FC, FS          | open          | 26         | 4     | 6           | R1               | Yes               | Dead                |
| 6      | ACC-Naive | M      | 74               | FC, FS          | open          | 10.8       | 3     | 7           | R0               | No                | Dead                |
| 7      | ACC-Naive | F      | 58               | FC              | open          | 11         | 2     | 8           | R0               | No                | Alive               |
| 8      | ACC-Naive | F      | 50               | FC              | open          | 10         | 3     | 8           | R0               | No                | Alive               |
| 9      | ACC-Naive | F      | 55               | FC,FS           | open          | 12.5       | 2     | 7           | R0               | No                | Dead                |
| 10     | ACC-Naive | M      | 75               | NF              | open          | 13         | 2     | 4           | R0               | Yes               | Alive               |
| 11     | ACC-Naive | M      | 86               | NF              | open          | 15         | 3     | 9           | R0               | No                | Dead                |
| 12     | ACC-Naive | F      | 48               | FA, FS          | open          | 9          | 3     | 8           | R0               | Yes               | Dead                |
| 13     | ACC-Naive | F      | 61               | NF              | open          | 13         | 2     | 7           | R0               | Yes               | Alive               |
| 14     | ACC-Naive | F      | 30               | FC,FS           | open          | 9          | 2     | 6           | R0               | Yes               | Alive               |
| 15     | ACC-Naive | M      | 38               | NF              | open          | 15         | 4     | 5           | R0               | Yes               | Alive               |
| 16     | ACC-Naive | F      | 45               | FC              | open          | 8.2        | 3     | 7           | R1               | Yes               | Alive               |
| 17     | ACC-Naive | M      | 43               | NF              | open          | 23         | 3     | 6           | R0               | No                | Dead                |
| 18     | ACC-Naive | F      | 33               | NF              | open          | 13.5       | 3     | 4           | Rx               | Yes               | Alive               |
| 19     | ACC-Naive | M      | 51               | FC              | open          | 19         | 3     | 9           | R0               | Yes               | Dead                |
| 20     | ACC-Naive | M      | 59               | NF              | open          | 12.5       | 2     | 6           | R0               | No                | Alive               |
| 21     | ACC-Naive | M      | 38               | FC              | open          | 9          | 3     | 4           | R0               | Yes               | Alive               |
| 22     | ACC-Naive | F      | 66               | NF              | open          | 8          | 4     | 7           | RX               | No                | Dead                |
| 23     | ACC-Naive | F      | 76               | NF              | open          | 15         | 3     | 9           | R0               | Yes               | Dead                |

|    |           |   |    |    |      |     |   |   |    |     |       |
|----|-----------|---|----|----|------|-----|---|---|----|-----|-------|
| 24 | ACC-Naive | M | 44 | NF | open | 25  | 3 | 9 | R1 | Yes | Dead  |
| 25 | ACC-Naive | F | 53 | NF | open | 12  | 3 | 8 | R0 | Yes | Alive |
| 26 | ACC-Naive | F | 28 | FC | open | 7   | 3 | 7 | R0 | Yes | Alive |
| 27 | ACC-Naive | M | 60 | FC | open | 15  | 2 | 8 | R0 | No  | Dead  |
| 28 | ACC-Naive | M | 55 | NF | open | 4.5 | 1 | 6 | R0 | No  | Alive |

NF: nonfunctioning, FC: cortisol producing, FA: Aldosterone producing, FS: Androgens producing, R0: Complete surgical resection, R1: microscopically positive resection margins. Lap: laparoscopic resection, Open: open adrenalectomy  
Tumor size (cm). Age at diagnosis (year)

**Supplemental Table 3.** Genes with significantly ( $P \leq 0.05$ , absolute value of log ratio  $> 0.1$ ) changed expression in tumors from ACC patients (dataset GSE10927) relative to expression in normal adrenocortical tissues.

| PROBE        | GENE SYMBOL | GENE TITLE                                                                                       | LOG RATIO (LOG10) | P- VALUE * |
|--------------|-------------|--------------------------------------------------------------------------------------------------|-------------------|------------|
| 1007_s_at    | DDR1        | discoidin domain receptor family; member 1                                                       | 0.9648            | 0.0022     |
| 1053_at      | RFC2        | replication factor C (activator 1) 2; 40kDa                                                      | 0.7519            | 0.0051     |
| 1552272_a_at | MGC24975    | hypothetical protein MGC24975                                                                    | 0.375             | 0.0051     |
| 1552277_a_at | C9orf30     | chromosome 9 open reading frame 30                                                               | 1.0681            | 0.0045     |
| 1552287_s_at | AFG3L1      | AFG3 ATPase family gene 3-like 1 (S. cerevisiae)                                                 | 0.8205            | 0.0055     |
| 1552304_at   | ALG10       | asparagine-linked glycosylation 10 homolog (yeast; alpha-1;2-glycosyltransferase)                | 0.3158            | 0.0194     |
| 1552306_at   | ALG10       | asparagine-linked glycosylation 10 homolog (yeast; alpha-1;2-glycosyltransferase)                | 0.5368            | 0.0132     |
| 1552312_a_at | MFAP3       | microfibrillar-associated protein 3                                                              | 0.8599            | 0.0038     |
| 1552325_at   | CCDC11      | coiled-coil domain containing 11                                                                 | 0.1137            | 0.0464     |
| 1552330_at   | MGC16385    | hypothetical protein MGC16385                                                                    | 1.4018            | 0.0011     |
| 1552343_s_at | PDE7A       | phosphodiesterase 7A                                                                             | 0.2148            | 0.0378     |
| 1552347_at   | CRYZL1      | crystallin; zeta (quinone reductase)-like 1                                                      | 0.8002            | 0.0072     |
| 1552399_a_at | BRF1        | BRF1 homolog; subunit of RNA polymerase III transcription initiation factor IIIB (S. cerevisiae) | 0.1308            | 0.0345     |
| 1552400_a_at | C15orf27    | chromosome 15 open reading frame 27                                                              | 0.8214            | 0.0068     |
| 1552417_a_at | NEDD1       | neural precursor cell expressed; developmentally down-regulated 1                                | 0.8595            | 0.0027     |
| 1552427_at   | ZNF485      | zinc finger protein 485                                                                          | 0.248             | 0.0433     |
| 1552470_a_at | ABHD11      | abhydrolase domain containing 11                                                                 | 0.3619            | 0.038      |
| 1552472_a_at | CENTB2      | centaurin; beta 2                                                                                | 0.4121            | 0.008      |
| 1552518_s_at | MTBP        | Mdm2; transformed 3T3 cell double minute 2; p53 binding protein (mouse) binding protein; 104kDa  | 0.2453            | 0.0026     |
| 1552546_a_at | LETM2       | leucine zipper-EF-hand containing transmembrane protein 2                                        | 0.1949            | 0.0114     |
| 1552563_a_at | C8orf6      | chromosome 8 open reading frame 6                                                                | 0.3558            | 0.0385     |
| 1552612_at   | CDC42SE2    | CDC42 small effector 2                                                                           | 1.0065            | 0.0004     |
| 1552613_s_at | CDC42SE2    | CDC42 small effector 2                                                                           | 1.17              | 0          |
| 1552618_at   | STX6        | syntaxin 6                                                                                       | 0.664             | 0.0133     |
| 1552619_a_at | ANLN        | anillin; actin binding protein                                                                   | 3.11              | 0          |
| 1552621_at   | POLR2J2     | DNA directed RNA polymerase II polypeptide J-related, RPB11b2 protein                            | 2.238             | 0          |

|              |           |                                                                                                                                                                                                      |        |        |
|--------------|-----------|------------------------------------------------------------------------------------------------------------------------------------------------------------------------------------------------------|--------|--------|
| 1552622_s_at | LOC441259 | DNA directed RNA polymerase II polypeptide J-related, PMS2 postmeiotic segregation increased 2 ( <i>S. cerevisiae</i> )-like, RPB11b2 protein, similar to postmeiotic segregation increased 2-like 2 | 2.1935 | 0      |
| 1552627_a_at | ARHGAP5   | Rho GTPase activating protein 5                                                                                                                                                                      | 1.0846 | 0.0116 |
| 1552628_a_at | HERPUD2   | HERPUD family member 2                                                                                                                                                                               | 0.3847 | 0.0163 |
| 1552634_a_at | ZNF101    | zinc finger protein 101                                                                                                                                                                              | 0.4719 | 0.042  |
| 1552648_a_at | TNFRSF10A | tumor necrosis factor receptor superfamily; member 10a                                                                                                                                               | 0.4232 | 0.0464 |
| 1552656_s_at | UHMK1     | U2AF homology motif (UHM) kinase 1                                                                                                                                                                   | 0.4209 | 0.0341 |
| 1552660_a_at | C5orf22   | chromosome 5 open reading frame 22                                                                                                                                                                   | 1.353  | 0.0074 |
| 1552670_a_at | LOC286044 | hypothetical protein LOC286044                                                                                                                                                                       | 1.2667 | 0.0098 |
| 1552678_a_at | USP28     | ubiquitin specific peptidase 28                                                                                                                                                                      | 0.4335 | 0.0471 |
| 1552680_a_at | CASC5     | cancer susceptibility candidate 5                                                                                                                                                                    | 0.5356 | 0.0038 |
| 1552682_a_at | CASC5     | cancer susceptibility candidate 5                                                                                                                                                                    | 0.2743 | 0.0077 |
| 1552689_at   | CASKIN1   | CASK interacting protein 1                                                                                                                                                                           | 0.3168 | 0.0058 |
| 1552695_a_at | SLC2A13   | solute carrier family 2 (facilitated glucose transporter); member 13                                                                                                                                 | 0.7187 | 0.0341 |
| 1552705_at   | DUSP19    | dual specificity phosphatase 19                                                                                                                                                                      | 0.3936 | 0.0398 |
| 1552708_a_at | DUSP19    | dual specificity phosphatase 19                                                                                                                                                                      | 0.1964 | 0.0261 |
| 1552716_at   | FLJ23577  | KPL2 protein                                                                                                                                                                                         | 0.7467 | 0.0005 |
| 1552729_at   | SNHG7     | small nucleolar RNA host gene (non-protein coding) 7                                                                                                                                                 | 0.2819 | 0.006  |
| 1552735_at   | PCDHGA4   | protocadherin gamma subfamily A; 4                                                                                                                                                                   | 1.6657 | 0.0106 |
| 1552740_at   | C2orf15   | chromosome 2 open reading frame 15                                                                                                                                                                   | 0.2168 | 0.0076 |
| 1552765_x_at | TMEM67    | transmembrane protein 67                                                                                                                                                                             | 0.2931 | 0.0002 |
| 1552770_s_at | ZNF563    | zinc finger protein 563                                                                                                                                                                              | 0.5457 | 0.0022 |
| 1552774_a_at | SLC25A27  | solute carrier family 25; member 27                                                                                                                                                                  | 0.756  | 0.0105 |
| 1552782_at   | SLC44A5   | solute carrier family 44; member 5                                                                                                                                                                   | 0.6179 | 0.0091 |
| 1552783_at   | ZNF417    | zinc finger protein 417                                                                                                                                                                              | 0.3104 | 0.0001 |
| 1552792_at   | SOCS4     | suppressor of cytokine signaling 4                                                                                                                                                                   | 0.2315 | 0.0326 |
| 1552793_at   | C8orf31   | chromosome 8 open reading frame 31                                                                                                                                                                   | 1.3836 | 0.0207 |
| 1552812_a_at | SENP1     | SUMO1/sentrin specific peptidase 1                                                                                                                                                                   | 0.4322 | 0.0061 |
| 1552816_at   | NXNL2     | nucleoredoxin-like 2                                                                                                                                                                                 | 0.1118 | 0.035  |
| 1552845_at   | CLDN15    | claudin 15                                                                                                                                                                                           | 0.4397 | 0.0001 |
| 1552914_a_at | CD276     | CD276 molecule                                                                                                                                                                                       | 0.4261 | 0.0216 |
| 1552921_a_at | FIGNL1    | figdgetin-like 1                                                                                                                                                                                     | 1.0777 | 0.0051 |
| 1552927_at   | MAP3K7IP3 | mitogen-activated protein kinase kinase kinase 7 interacting protein 3                                                                                                                               | 0.2526 | 0.0157 |
| 1552928_s_at | MAP3K7IP3 | mitogen-activated protein kinase kinase kinase 7 interacting protein 3                                                                                                                               | 0.4702 | 0.0056 |
| 1552937_s_at | ATRIP     | ATR interacting protein, three prime repair exonuclease 1                                                                                                                                            | 0.2337 | 0.0268 |
| 1552946_at   | ZNF114    | zinc finger protein 114                                                                                                                                                                              | 0.7847 | 0.0149 |

|              |              |                                                               |        |        |
|--------------|--------------|---------------------------------------------------------------|--------|--------|
| 1552947_x_at | ZNF114       | zinc finger protein 114                                       | 0.5909 | 0.0155 |
| 1552978_a_at | SCAMP1       | secretory carrier membrane protein 1                          | 1.4371 | 0.0032 |
| 1553015_a_at | RECQL4       | RecQ protein-like 4                                           | 0.4043 | 0.0168 |
| 1553099_at   | TIGD1        | tigger transposable element derived 1                         | 1.8474 | 0      |
| 1553106_at   | C5orf24      | chromosome 5 open reading frame 24                            | 0.9766 | 0.0094 |
| 1553107_s_at | C5orf24      | chromosome 5 open reading frame 24                            | 0.6234 | 0.047  |
| 1553108_at   | C5orf24      | chromosome 5 open reading frame 24                            | 0.7137 | 0.0078 |
| 1553112_s_at | CDK8         | cyclin-dependent kinase 8                                     | 1.3157 | 0.0134 |
| 1553117_a_at | STK38        | serine/threonine kinase 38                                    | 0.9321 | 0.0135 |
| 1553122_s_at | RBAK         | RB-associated KRAB zinc finger                                | 0.7681 | 0.0028 |
| 1553145_at   | FLJ39653     | hypothetical FLJ39653                                         | 1.2383 | 0.0018 |
| 1553148_a_at | SNX13        | sorting nexin 13                                              | 0.8032 | 0.0075 |
| 1553158_at   | C3orf34      | chromosome 3 open reading frame 34                            | 0.3219 | 0.0378 |
| 1553159_at   | DNAH11       | dynein; axonemal; heavy chain 11                              | 1.3521 | 0.0447 |
| 1553162_x_at | C19orf55     | chromosome 19 open reading frame 55                           | 0.3884 | 0.0011 |
| 1553167_a_at | SEPSECS      | Sep (O-phosphoserine) tRNA:Sec (selenocysteine) tRNA synthase | 0.275  | 0.0476 |
| 1553172_at   | ZNF777       | zinc finger protein 777                                       | 0.4541 | 0.0038 |
| 1553185_at   | RASEF        | RAS and EF-hand domain containing                             | 1.2088 | 0.0003 |
| 1553186_x_at | RASEF        | RAS and EF-hand domain containing                             | 1.4138 | 0.0001 |
| 1553192_at   | ZNF441       | zinc finger protein 441                                       | 0.5464 | 0.005  |
| 1553193_at   | ZNF441       | zinc finger protein 441                                       | 0.5759 | 0.005  |
| 1553216_at   | ZNF41        | zinc finger protein 41                                        | 0.2711 | 0.0215 |
| 1553217_s_at | ZNF41        | zinc finger protein 41                                        | 0.4608 | 0.0056 |
| 1553225_s_at | ZNF75        | zinc finger protein 75 (D8C6)                                 | 1.127  | 0.002  |
| 1553227_s_at | BRWD1        | bromodomain and WD repeat domain containing 1                 | 0.5544 | 0.0485 |
| 1553229_at   | ZNF572       | zinc finger protein 572                                       | 0.2494 | 0.0183 |
| 1553244_at   | FANCB        | Fanconi anemia; complementation group B                       | 0.165  | 0.0196 |
| 1553247_a_at | ZNF709       | zinc finger protein 709                                       | 0.2313 | 0.0096 |
| 1553252_a_at | BRWD3        | bromodomain and WD repeat domain containing 3                 | 0.5739 | 0.0259 |
| 1553271_at   | DIP2B        | DIP2 disco-interacting protein 2 homolog B (Drosophila)       | 0.5305 | 0.0065 |
| 1553274_a_at | C6orf151     | chromosome 6 open reading frame 151                           | 0.715  | 0.0165 |
| 1553286_at   | ZNF555       | zinc finger protein 555                                       | 0.8484 | 0.002  |
| 1553299_at   | RP4-621O15.2 | hypothetical protein FLJ31401                                 | 0.388  | 0.0335 |
| 1553300_a_at | DGKH         | diacylglycerol kinase; eta                                    | 0.1537 | 0.0024 |
| 1553301_a_at | TMEM182      | transmembrane protein 182                                     | 0.1412 | 0.0336 |
| 1553336_a_at | MIER3        | mesoderm induction early response 1; family member 3          | 0.2286 | 0.007  |

|              |          |                                                                                  |        |        |
|--------------|----------|----------------------------------------------------------------------------------|--------|--------|
| 1553349_at   | ARID2    | AT rich interactive domain 2 (ARID; RFX-like)                                    | 1.6355 | 0.0001 |
| 1553387_at   | ATM      | ataxia telangiectasia mutated                                                    | 0.1777 | 0.0235 |
| 1553423_a_at | SLFN13   | schlafen family member 13                                                        | 0.7257 | 0.0069 |
| 1553459_at   | FLJ39660 | hypothetical protein FLJ39660                                                    | 0.1993 | 0.0114 |
| 1553508_at   | MDS2     | myelodysplastic syndrome 2 translocation associated                              | 0.1236 | 0.0179 |
| 1553528_a_at | TAF5     | TAF5 RNA polymerase II; TATA box binding protein (TBP)-associated factor; 100kDa | 0.788  | 0.0086 |
| 1553542_at   | CCDC125  | coiled-coil domain containing 125                                                | 0.303  | 0.0057 |
| 1553625_at   | FAM98B   | family with sequence similarity 98; member B                                     | 0.2638 | 0.0005 |
| 1553651_at   | C18orf54 | chromosome 18 open reading frame 54                                              | 0.1384 | 0.0108 |
| 1553675_at   | KLC4     | kinesin light chain 4                                                            | 0.1517 | 0.0206 |
| 1553677_a_at | TIPRL    | TIP41; TOR signaling pathway regulator-like (S. cerevisiae)                      | 0.5755 | 0.026  |
| 1553679_s_at | VKORC1L1 | vitamin K epoxide reductase complex; subunit 1-like 1                            | 0.3831 | 0.0234 |
| 1553685_s_at | SP1      | Sp1 transcription factor                                                         | 0.8136 | 0.0081 |
| 1553691_at   | B3GALNT2 | beta-1;3-N-acetylgalactosaminyltransferase 2                                     | 0.4995 | 0.0384 |
| 1553693_s_at | CBR4     | carbonyl reductase 4                                                             | 0.8991 | 0.0005 |
| 1553696_s_at | ZNF569   | zinc finger protein 569                                                          | 0.6621 | 0.0242 |
| 1553697_at   | C1orf96  | chromosome 1 open reading frame 96                                               | 0.2456 | 0.013  |
| 1553698_a_at | C1orf96  | chromosome 1 open reading frame 96                                               | 0.3637 | 0.0298 |
| 1553703_at   | ZNF791   | zinc finger protein 791                                                          | 0.8554 | 0      |
| 1553704_x_at | ZNF791   | zinc finger protein 791                                                          | 0.8549 | 0.0001 |
| 1553710_at   | C4orf39  | chromosome 4 open reading frame 39                                               | 0.4611 | 0.0306 |
| 1553711_a_at | C4orf39  | chromosome 4 open reading frame 39                                               | 0.3447 | 0.0159 |
| 1553717_at   | KCTD7    | potassium channel tetramerisation domain containing 7                            | 0.2889 | 0.0014 |
| 1553732_s_at | CCDC123  | coiled-coil domain containing 123                                                | 0.6076 | 0.0004 |
| 1553750_a_at | FAM76B   | family with sequence similarity 76; member B                                     | 0.4087 | 0.0462 |
| 1553764_a_at | JUB      | jub; ajuba homolog (Xenopus laevis)                                              | 1.2362 | 0.0114 |
| 1553781_at   | ZC3HAV1L | zinc finger CCCH-type; antiviral 1-like                                          | 0.2033 | 0.017  |
| 1553798_a_at | FBXL13   | F-box and leucine-rich repeat protein 13                                         | 1.5057 | 0.0027 |
| 1553810_a_at | KIAA1524 | KIAA1524                                                                         | 0.4442 | 0.0005 |
| 1553815_a_at |          |                                                                                  | 0.3342 | 0.042  |
| 1553852_at   | VPS13B   | vacuolar protein sorting 13 homolog B (yeast)                                    | 0.3125 | 0.0226 |
| 1553868_a_at | C5orf36  | chromosome 5 open reading frame 36                                               | 0.2433 | 0.0083 |
| 1553885_x_at | ZNF99    | zinc finger protein 99                                                           | 0.2329 | 0.0449 |
| 1553901_x_at | ZNF486   | zinc finger protein 486                                                          | 0.2112 | 0.0223 |

|              |               |                                                                                         |        |        |
|--------------|---------------|-----------------------------------------------------------------------------------------|--------|--------|
| 1553909_x_at | C10orf6       | chromosome 10 open reading frame 6                                                      | 0.7169 | 0.0067 |
| 1553957_at   | ZNF564        | zinc finger protein 564                                                                 | 0.8486 | 0.0004 |
| 1553976_a_at | RP11-529I10.4 | deleted in a mouse model of primary ciliary dyskinesia                                  | 1.3594 | 0.0006 |
| 1553987_at   | C12orf47      | chromosome 12 open reading frame 47                                                     | 0.7792 | 0.007  |
| 1553990_at   | C16orf79      | chromosome 16 open reading frame 79                                                     | 0.6161 | 0.0001 |
| 1553992_s_at | NBR2          | neighbor of BRCA1 gene 2                                                                | 0.7669 | 0.0395 |
| 1553993_s_at | MED25         | mediator complex subunit 25                                                             | 0.4788 | 0.0146 |
| 1553997_a_at | ASPHD1        | aspartate beta-hydroxylase domain containing 1                                          | 1.1626 | 0.0197 |
| 1554006_a_at | LLGL2         | lethal giant larvae homolog 2 (Drosophila)                                              | 0.188  | 0.0472 |
| 1554019_s_at | C6orf182      | chromosome 6 open reading frame 182                                                     | 0.3704 | 0.0015 |
| 1554020_at   | BICD1         | bicaudal D homolog 1 (Drosophila)                                                       | 0.7578 | 0.0132 |
| 1554021_a_at | ZNF12         | zinc finger protein 12                                                                  | 1.0387 | 0      |
| 1554026_a_at | MYO10         | myosin X                                                                                | 0.5995 | 0.0348 |
| 1554029_a_at | KIAA0372      | KIAA0372                                                                                | 1.2766 | 0.002  |
| 1554052_at   | CNOT1         | CCR4-NOT transcription complex; subunit 1                                               | 0.5238 | 0.003  |
| 1554057_at   | LOC645676     | hypothetical LOC645676                                                                  | 0.6006 | 0.0287 |
| 1554077_a_at | TMEM53        | transmembrane protein 53                                                                | 0.8538 | 0.0495 |
| 1554079_at   | GALNTL4       | UDP-N-acetyl-alpha-D-galactosamine:polypeptide N-acetylgalactosaminyltransferase-like 4 | 1.7385 | 0.0004 |
| 1554095_at   | RBM33         | RNA binding motif protein 33                                                            | 0.3507 | 0.0298 |
| 1554098_at   | SPIN3         | spindlin family; member 3                                                               | 0.1662 | 0.0241 |
| 1554101_a_at | TMTC4         | transmembrane and tetratricopeptide repeat containing 4                                 | 0.2532 | 0.018  |
| 1554102_a_at | TMTC4         | transmembrane and tetratricopeptide repeat containing 4                                 | 0.3492 | 0.0279 |
| 1554113_a_at | SLC4A8        | solute carrier family 4; sodium bicarbonate cotransporter; member 8                     | 0.5411 | 0.0034 |
| 1554119_at   | C16orf57      | chromosome 16 open reading frame 57                                                     | 0.146  | 0.0436 |
| 1554127_s_at | MSRB3         | methionine sulfoxide reductase B3                                                       | 1.6199 | 0.0046 |
| 1554152_a_at | OGDH          | oxoglutarate (alpha-ketoglutarate) dehydrogenase (lipoamide)                            | 0.6538 | 0.045  |
| 1554154_at   | GDAP2         | ganglioside induced differentiation associated protein 2                                | 0.4415 | 0.0355 |
| 1554160_a_at | ZNF446        | zinc finger protein 446                                                                 | 0.3306 | 0.0003 |
| 1554168_a_at | SH3KBP1       | SH3-domain kinase binding protein 1                                                     | 0.8027 | 0.0032 |
| 1554178_a_at | FAM126B       | family with sequence similarity 126; member B                                           | 0.8849 | 0.0051 |
| 1554193_s_at | MANEA         | mannosidase; endo-alpha                                                                 | 0.2381 | 0.0397 |
| 1554216_at   | CCDC132       | coiled-coil domain containing 132                                                       | 0.2004 | 0.0099 |
| 1554217_a_at | CCDC132       | coiled-coil domain containing 132                                                       | 0.6301 | 0.0012 |
| 1554229_at   | LOC153222     | adult retina protein                                                                    | 0.643  | 0.005  |



|              |            |                                                                               |        |        |
|--------------|------------|-------------------------------------------------------------------------------|--------|--------|
| 1554249_a_at | ZNF638     | zinc finger protein 638                                                       | 0.5013 | 0.0417 |
| 1554250_s_at | TRIM73     | tripartite motif-containing 73                                                | 0.867  | 0.0052 |
| 1554260_a_at | FRYL       | FRY-like                                                                      | 1.0652 | 0.0005 |
| 1554264_at   | CKAP2      | cytoskeleton associated protein 2                                             | 0.1981 | 0.0067 |
| 1554271_a_at | CENPL      | centromere protein L                                                          | 1.2677 | 0.0013 |
| 1554277_s_at | FANCM      | Fanconi anemia; complementation group M                                       | 0.3091 | 0.0004 |
| 1554287_at   | TRIM4      | tripartite motif-containing 4                                                 | 0.4646 | 0.0025 |
| 1554290_at   | HERC3      | hect domain and RLD 3                                                         | 0.282  | 0.0234 |
| 1554292_a_at | KIAA0701   | KIAA0701 protein                                                              | 0.2663 | 0.0277 |
| 1554294_s_at | TTBK2      | tau tubulin kinase 2                                                          | 0.1837 | 0.0071 |
| 1554298_a_at | WDR49      | WD repeat domain 49                                                           | 0.1045 | 0.0333 |
| 1554310_a_at | EIF4G3     | eukaryotic translation initiation factor 4 gamma; 3                           | 0.2307 | 0.0264 |
| 1554316_at   | PGLS       | 6-phosphogluconolactonase                                                     | 0.3009 | 0.0053 |
| 1554321_a_at | NFS1       | NFS1 nitrogen fixation 1 homolog (S. cerevisiae)                              | 1.0244 | 0.0471 |
| 1554324_s_at | DYNC2LI1   | dynein; cytoplasmic 2; light intermediate chain 1                             | 0.4186 | 0.0002 |
| 1554327_a_at | CANT1      | calcium activated nucleotidase 1                                              | 0.3613 | 0.0262 |
| 1554345_a_at | GIN1       | gypsy retrotransposon integrase 1                                             | 0.6006 | 0.0193 |
| 1554348_s_at | CDKN2AIPNL | CDKN2A interacting protein N-terminal like                                    | 0.2963 | 0.0083 |
| 1554390_s_at | ACTR2      | ARP2 actin-related protein 2 homolog (yeast)                                  | 1.137  | 0.0105 |
| 1554408_a_at | TK1        | thymidine kinase 1; soluble                                                   | 1.0537 | 0.0064 |
| 1554414_a_at | OSGIN2     | oxidative stress induced growth inhibitor family member 2                     | 0.938  | 0.0308 |
| 1554424_at   | FIP1L1     | FIP1 like 1 (S. cerevisiae)                                                   | 0.2466 | 0.0347 |
| 1554433_a_at | ZNF146     | zinc finger protein 146                                                       | 1.3485 | 0.0084 |
| 1554447_at   | LOC554203  | hypothetical LOC554203                                                        | 0.7564 | 0.0386 |
| 1554448_at   | LOC554203  | hypothetical LOC554203                                                        | 0.2112 | 0.0414 |
| 1554449_at   | MIER3      | mesoderm induction early response 1; family member 3                          | 0.4655 | 0.0064 |
| 1554450_s_at | MIER3      | mesoderm induction early response 1; family member 3                          | 0.878  | 0.0057 |
| 1554451_s_at | CIP29      | DnaJ (Hsp40) homolog; subfamily C; member 14, cytokine induced protein 29 kDa | 0.7922 | 0.0156 |
| 1554452_a_at | HIG2       | hypoxia-inducible protein 2                                                   | 2.2394 | 0.0005 |
| 1554455_at   | LINS1      | lines homolog 1 (Drosophila)                                                  | 0.6276 | 0.0377 |
| 1554456_a_at | LINS1      | lines homolog 1 (Drosophila)                                                  | 1.0125 | 0.0033 |
| 1554465_s_at | ZNF673     | zinc finger protein 673, zinc finger protein 674                              | 0.4093 | 0.0453 |
| 1554472_a_at | PHF20L1    | PHD finger protein 20-like 1                                                  | 0.6935 | 0.0102 |
| 1554478_a_at | HEATR3     | HEAT repeat containing 3                                                      | 0.4793 | 0.0418 |
| 1554487_a_at | CREBL1     | cAMP responsive element binding protein-like 1                                | 0.2608 | 0.0246 |
| 1554501_at   | TSC22D4    | TSC22 domain family; member 4                                                 | 1.1582 | 0.0011 |
| 1554512_a_at | CCDC123    | coiled-coil domain containing 123                                             | 0.4573 | 0.0009 |

|              |           |                                                                       |        |        |
|--------------|-----------|-----------------------------------------------------------------------|--------|--------|
| 1554513_s_at | CCDC123   | coiled-coil domain containing 123                                     | 0.7337 | 0.0003 |
| 1554539_a_at | RHOF      | ras homolog gene family; member F (in filopodia)                      | 1.2286 | 0.0025 |
| 1554553_s_at | YIF1B     | Yip1 interacting factor homolog B (S. cerevisiae)                     | 1.4627 | 0      |
| 1554555_a_at | SETD6     | SET domain containing 6                                               | 0.5424 | 0.0061 |
| 1554572_a_at | SUV39H2   | suppressor of variegation 3-9 homolog 2 (Drosophila)                  | 0.9507 | 0.0055 |
| 1554577_a_at | PSMD10    | proteasome (prosome; macropain) 26S subunit; non-ATPase; 10           | 0.8939 | 0.0189 |
| 1554588_a_at | TTC30B    | tetratricopeptide repeat domain 30B                                   | 1.1072 | 0      |
| 1554614_a_at | PTBP2     | polypyrimidine tract binding protein 2                                | 0.6384 | 0.0336 |
| 1554618_at   | HRBL      | HIV-1 Rev binding protein-like                                        | 0.3355 | 0.0038 |
| 1554619_at   | LOC153364 | similar to metallo-beta-lactamase superfamily protein                 | 0.3394 | 0.0025 |
| 1554628_at   | ZNF57     | zinc finger protein 57                                                | 1.7436 | 0.0001 |
| 1554637_a_at | CBFA2T2   | core-binding factor; runt domain; alpha subunit 2; translocated to; 2 | 0.7486 | 0.0013 |
| 1554638_at   | ZFYVE16   | zinc finger; FYVE domain containing 16                                | 0.9933 | 0.0189 |
| 1554696_s_at | TYMS      | thymidylate synthetase                                                | 2.3347 | 0.0006 |
| 1554697_at   | ADAMTS9   | ADAM metallopeptidase with thrombospondin type 1 motif; 9             | 0.4274 | 0.0463 |
| 1554704_at   | ATP8B3    | ATPase; Class I; type 8B; member 3                                    | 1.311  | 0.0027 |
| 1554723_x_at |           |                                                                       | 0.1008 | 0.0103 |
| 1554726_at   | ZNF655    | zinc finger protein 655                                               | 1.1302 | 0.0051 |
| 1554740_a_at | IPP       | intracisternal A particle-promoted polypeptide                        | 0.6963 | 0.0156 |
| 1554761_a_at | HEATR2    | HEAT repeat containing 2                                              | 0.5912 | 0.0089 |
| 1554762_a_at | WWC2      | WW and C2 domain containing 2                                         | 0.3031 | 0.0277 |
| 1554767_s_at | CRYZL1    | crystallin; zeta (quinone reductase)-like 1                           | 0.5838 | 0.0461 |
| 1554768_a_at | MAD2L1    | MAD2 mitotic arrest deficient-like 1 (yeast)                          | 3.1648 | 0      |
| 1554769_at   | ZNF785    | zinc finger protein 785                                               | 1.0149 | 0.0007 |
| 1554770_x_at | ZNF785    | zinc finger protein 785                                               | 1.0614 | 0.0013 |
| 1554771_at   |           | CDNA clone IMAGE:4300887                                              | 0.5365 | 0.0053 |
| 1554780_a_at | PHTF2     | putative homeodomain transcription factor 2                           | 0.4238 | 0.003  |
| 1554789_a_at | PDE8B     | phosphodiesterase 8B                                                  | 2.6635 | 0.0002 |
| 1554794_a_at | UBE3C     | ubiquitin protein ligase E3C                                          | 0.6854 | 0.0057 |
| 1554808_at   | ACP1      | acid phosphatase 1; soluble                                           | 0.1206 | 0.0177 |
| 1554810_at   | PLA2G4C   | phospholipase A2; group IVC (cytosolic; calcium-independent)          | 0.4347 | 0.01   |
| 1554822_at   | PHTF2     | putative homeodomain transcription factor 2                           | 0.3471 | 0.0047 |
| 1554873_at   | CSPP1     | centrosome and spindle pole associated protein 1                      | 0.2541 | 0.0087 |
| 1554878_a_at | ABCD3     | ATP-binding cassette; sub-family D (ALD); member 3                    | 1.0523 | 0.02   |

|              |          |                                                                                          |        |        |
|--------------|----------|------------------------------------------------------------------------------------------|--------|--------|
| 1554883_a_at | ERCC8    | excision repair cross-complementing rodent repair deficiency; complementation group 8    | 0.9533 | 0.0065 |
| 1554885_a_at | PRIM2    | primase; DNA; polypeptide 2 (58kDa)                                                      | 0.7212 | 0.0044 |
| 1554889_at   | TIA1     | TIA1 cytotoxic granule-associated RNA binding protein                                    | 0.4018 | 0.003  |
| 1554890_a_at | TIA1     | TIA1 cytotoxic granule-associated RNA binding protein                                    | 0.6569 | 0.0233 |
| 1554933_at   | PSIP1    | PC4 and SFRS1 interacting protein 1                                                      | 0.3925 | 0.0119 |
| 1554946_at   |          | CDNA FLJ39613 fis; clone SKNSH2009357                                                    | 0.258  | 0.045  |
| 1554958_at   | ZNF641   | zinc finger protein 641                                                                  | 0.6297 | 0.0356 |
| 1554962_a_at | FGFR4    | fibroblast growth factor receptor 4                                                      | 0.291  | 0.0327 |
| 1554988_at   | SLC9A11  | solute carrier family 9; member 11                                                       | 0.1282 | 0.0294 |
| 1555004_a_at | RBL1     | retinoblastoma-like 1 (p107)                                                             | 0.2824 | 0.0258 |
| 1555014_x_at |          | OK/SW-cl.92                                                                              | 1.4522 | 0.0019 |
| 1555015_a_at | ZNF398   | zinc finger protein 398                                                                  | 0.3589 | 0.0106 |
| 1555039_a_at | ABCC4    | ATP-binding cassette; sub-family C (CFTR/MRP); member 4                                  | 0.2657 | 0.0157 |
| 1555057_at   | NDUFS4   | NADH dehydrogenase (ubiquinone) Fe-S protein 4; 18kDa (NADH-coenzyme Q reductase)        | 0.3912 | 0.0026 |
| 1555106_a_at | CTDSPL2  | CTD (carboxy-terminal domain; RNA polymerase II; polypeptide A) small phosphatase like 2 | 1.0225 | 0.0136 |
| 1555107_a_at | KIAA1530 | KIAA1530 protein                                                                         | 0.1443 | 0.0136 |
| 1555110_a_at | KLHL3    | kelch-like 3 (Drosophila)                                                                | 0.151  | 0.0489 |
| 1555125_at   | C21orf66 | chromosome 21 open reading frame 66                                                      | 0.7845 | 0.004  |
| 1555146_at   | ATF2     | activating transcription factor 2                                                        | 0.3705 | 0.0036 |
| 1555153_s_at | FCHO2    | FCH domain only 2                                                                        | 0.1478 | 0.0174 |
| 1555192_at   | ZNF277P  | zinc finger protein 277 pseudogene                                                       | 0.3303 | 0.0041 |
| 1555193_a_at | ZNF277P  | zinc finger protein 277 pseudogene                                                       | 0.7723 | 0.0161 |
| 1555227_a_at | MANEA    | mannosidase; endo-alpha                                                                  | 0.1314 | 0.0045 |
| 1555243_x_at | C8orf59  | chromosome 8 open reading frame 59                                                       | 0.3546 | 0.04   |
| 1555247_a_at | RAPGEF6  | Rap guanine nucleotide exchange factor (GEF) 6                                           | 1.7908 | 0      |
| 1555259_at   | ZAK      | sterile alpha motif and leucine zipper containing kinase AZK                             | 0.6597 | 0.0123 |
| 1555262_a_at | MAGI1    | membrane associated guanylate kinase; WW and PDZ domain containing 1                     | 0.3056 | 0.0001 |
| 1555274_a_at | SELI     | selenoprotein I                                                                          | 1.1645 | 0.0033 |
| 1555303_at   |          |                                                                                          | 0.6865 | 0.0057 |
| 1555307_at   | TTF2     | transcription termination factor; RNA polymerase II                                      | 0.2201 | 0.0154 |
| 1555325_s_at | ZNF26    | zinc finger protein 26                                                                   | 0.534  | 0.01   |
| 1555326_a_at | ADAM9    | ADAM metallopeptidase domain 9 (meltrin gamma)                                           | 1.3521 | 0.0397 |
| 1555330_at   | GCLC     | glutamate-cysteine ligase; catalytic subunit                                             | 0.2035 | 0.0085 |

|              |           |                                                                                                                                                             |        |        |
|--------------|-----------|-------------------------------------------------------------------------------------------------------------------------------------------------------------|--------|--------|
| 1555334_s_at | SLC30A5   | solute carrier family 30 (zinc transporter); member 5                                                                                                       | 0.8814 | 0.0388 |
| 1555337_a_at | ZNF317    | zinc finger protein 317                                                                                                                                     | 0.5591 | 0.0104 |
| 1555347_at   | PDXDC1    | pyridoxal-dependent decarboxylase domain containing 1                                                                                                       | 0.2867 | 0.0097 |
| 1555350_at   | PPHLN1    | periphilin 1                                                                                                                                                | 0.317  | 0.002  |
| 1555358_a_at | ENTPD4    | ectonucleoside triphosphate diphosphohydrolase 4                                                                                                            | 0.3215 | 0.0183 |
| 1555370_a_at | CAMTA1    | calmodulin binding transcription activator 1                                                                                                                | 1.3313 | 0.0302 |
| 1555373_at   | C21orf114 | chromosome 21 open reading frame 114                                                                                                                        | 0.3892 | 0.0007 |
| 1555391_a_at | ALS2CR8   | amyotrophic lateral sclerosis 2 (juvenile) chromosome region; candidate 8                                                                                   | 0.1471 | 0.0178 |
| 1555408_at   | BAGE2     | B melanoma antigen family; member 2, B melanoma antigen family; member 4                                                                                    | 0.4428 | 0.0328 |
| 1555409_a_at | BAGE2     | B melanoma antigen family; member 2, B melanoma antigen family; member 3, B melanoma antigen family; member 5, myeloid/lymphoid or mixed-lineage leukemia 3 | 0.4191 | 0.0211 |
| 1555412_at   | FBXL21    | F-box and leucine-rich repeat protein 21                                                                                                                    | 1.0621 | 0.0496 |
| 1555448_at   | C14orf108 | chromosome 14 open reading frame 108                                                                                                                        | 0.3295 | 0.012  |
| 1555460_a_at | SLC39A6   | solute carrier family 39 (zinc transporter); member 6                                                                                                       | 1.5544 | 0.0015 |
| 1555464_at   | IFIH1     | interferon induced with helicase C domain 1                                                                                                                 | 0.1812 | 0.0481 |
| 1555469_a_at | CLASP2    | cytoplasmic linker associated protein 2                                                                                                                     | 0.3681 | 0.0203 |
| 1555476_at   | IREB2     | iron-responsive element binding protein 2                                                                                                                   | 0.6659 | 0.0007 |
| 1555487_a_at | ACTR3B    | ARP3 actin-related protein 3 homolog B (yeast)                                                                                                              | 0.4694 | 0.0101 |
| 1555495_a_at | SDCCAG10  | serologically defined colon cancer antigen 10                                                                                                               | 0.6628 | 0.0065 |
| 1555500_s_at | SLC2A4RG  | SLC2A4 regulator                                                                                                                                            | 0.8094 | 0.0059 |
| 1555501_s_at | RSRC1     | arginine/serine-rich coiled-coil 1                                                                                                                          | 0.9166 | 0.0027 |
| 1555514_a_at | PIAS2     | protein inhibitor of activated STAT; 2                                                                                                                      | 0.6404 | 0.0181 |
| 1555547_at   |           | BPA-1 mRNA for brain peptide A1                                                                                                                             | 0.3105 | 0.0086 |
| 1555555_at   | BBS9      | Bardet-Biedl syndrome 9                                                                                                                                     | 0.1062 | 0.0276 |
| 1555560_at   | UGCGL2    | UDP-glucose ceramide glucosyltransferase-like 2                                                                                                             | 0.1208 | 0.0077 |
| 1555562_a_at | ZCCHC7    | zinc finger; CCHC domain containing 7                                                                                                                       | 0.3985 | 0.0253 |
| 1555571_at   | IMMP2L    | IMP2 inner mitochondrial membrane peptidase-like ( <i>S. cerevisiae</i> )                                                                                   | 0.4186 | 0.0418 |
| 1555573_at   | C10orf93  | chromosome 10 open reading frame 93                                                                                                                         | 0.339  | 0.0372 |
| 1555575_a_at | KDELR1    | KDEL (Lys-Asp-Glu-Leu) endoplasmic reticulum protein retention receptor 1                                                                                   | 0.583  | 0      |
| 1555594_a_at | MBNL1     | muscleblind-like ( <i>Drosophila</i> )                                                                                                                      | 0.77   | 0.0085 |

|              |           |                                                                                    |        |        |
|--------------|-----------|------------------------------------------------------------------------------------|--------|--------|
| 1555608_at   | CAPRIN2   | caprin family member 2                                                             | 0.2081 | 0.0059 |
| 1555618_s_at | SAE1      | SUMO1 activating enzyme subunit 1                                                  | 1.4009 | 0.0027 |
| 1555677_s_at | SMC1A     | structural maintenance of chromosomes 1A                                           | 0.3005 | 0.002  |
| 1555751_a_at | GEMIN7    | gem (nuclear organelle) associated protein 7                                       | 1.3165 | 0.0001 |
| 1555758_a_at | CDKN3     | cyclin-dependent kinase inhibitor 3 (CDK2-associated dual specificity phosphatase) | 4.3841 | 0      |
| 1555772_a_at | CDC25A    | cell division cycle 25 homolog A (S. pombe)                                        | 0.8808 | 0.0006 |
| 1555778_a_at | POSTN     | periostin; osteoblast specific factor                                              | 2.2679 | 0.0137 |
| 1555785_a_at | XRN1      | 5'-3' exoribonuclease 1                                                            | 0.2756 | 0.0489 |
| 1555793_a_at | ZNF545    | zinc finger protein 545                                                            | 1.0275 | 0.0326 |
| 1555826_at   | EPR1      | Effector cell peptidase receptor 1                                                 | 0.4516 | 0.0038 |
| 1555841_at   |           |                                                                                    | 0.9481 | 0.008  |
| 1555842_at   | LOC284356 | hypothetical protein LOC284356                                                     | 2.3316 | 0      |
| 1555843_at   | HNRPM     | Heterogeneous nuclear ribonucleoprotein M                                          | 0.56   | 0.0238 |
| 1555882_at   | SPIN3     | spindlin family; member 3                                                          | 1.0131 | 0.0228 |
| 1555894_s_at | ABBA-1    | actin-bundling protein with BAIAP2 homology                                        | 0.713  | 0.0106 |
| 1555895_at   | DNM2      | dynamins 2                                                                         | 0.4418 | 0.0041 |
| 1555898_at   | LOC150759 | Hypothetical protein LOC150759                                                     | 0.2867 | 0.007  |
| 1555900_at   |           | CDNA clone IMAGE:5284820                                                           | 0.8142 | 0.0064 |
| 1555907_at   |           | Homo sapiens; clone IMAGE:5247320; mRNA                                            | 1.3185 | 0.0155 |
| 1555910_at   | PTCD2     | pentatricopeptide repeat domain 2                                                  | 0.7526 | 0.0031 |
| 1555920_at   | CBX3      | Chromobox homolog 3 (HP1 gamma homolog; Drosophila)                                | 1.1362 | 0.0101 |
| 1555932_at   |           | CDNA FLJ36889 fis; clone BNGH42009021                                              | 0.1016 | 0.0409 |
| 1555938_x_at | VIM       | vimentin                                                                           | 1.2195 | 0.0277 |
| 1555944_at   | FAM120A   | family with sequence similarity 120A                                               | 0.132  | 0.0184 |
| 1555960_at   | HINT1     | Histidine triad nucleotide binding protein 1                                       | 0.9533 | 0      |
| 1555996_s_at | EIF4A2    | eukaryotic translation initiation factor 4A; isoform 2                             | 1.3548 | 0.0097 |
| 1556009_at   | PEX13     | peroxisome biogenesis factor 13                                                    | 0.5943 | 0.0136 |
| 1556015_a_at | MESP2     | mesoderm posterior 2 homolog (mouse)                                               | 0.1946 | 0.0136 |
| 1556033_at   |           | CDNA FLJ38785 fis; clone LIVER2001329                                              | 0.543  | 0.0083 |
| 1556049_at   | RTN4      | reticulon 4                                                                        | 1.0091 | 0.0134 |
| 1556051_a_at | BICD1     | bicaudal D homolog 1 (Drosophila)                                                  | 1.4401 | 0.0018 |
| 1556054_at   |           | Full length insert cDNA clone ZD45C02                                              | 0.7204 | 0.025  |
| 1556061_at   | LOC283012 | hypothetical protein LOC283012, ribonuclease P/MRP 30kDa subunit                   | 0.8723 | 0.0008 |
| 1556064_at   | LOC284926 | Hypothetical protein LOC284926                                                     | 0.4828 | 0.0466 |
| 1556088_at   | OR5T2     | olfactory receptor; family 5; subfamily T; member 2                                | 0.473  | 0.0443 |

|              |           |                                                       |        |        |
|--------------|-----------|-------------------------------------------------------|--------|--------|
| 1556097_at   |           | MRNA; cDNA DKFZp686A11113 (from clone DKFZp686A11113) | 1.0048 | 0.0043 |
| 1556103_at   |           | CDNA FLJ30565 fis; clone BRAWH2005008                 | 0.5848 | 0.0037 |
| 1556117_at   |           | CDNA FLJ33523 fis; clone BRAMY2006411                 | 0.1194 | 0.0256 |
| 1556121_at   |           | CDNA FLJ11689 fis; clone HEMBA1004977                 | 0.7368 | 0.0322 |
| 1556125_at   | GPATCH2   | G patch domain containing 2                           | 0.2811 | 0.0084 |
| 1556144_at   | DHX30     | DEAH (Asp-Glu-Ala-His) box polypeptide 30             | 0.3002 | 0.0011 |
| 1556175_at   | ABBA-1    | actin-bundling protein with BAIAP2 homology           | 0.1323 | 0.0071 |
| 1556180_at   | LOC729678 | hypothetical protein LOC729678                        | 0.9673 | 0.0127 |
| 1556187_at   |           | Clone 23822 mRNA sequence                             | 0.2114 | 0.0081 |
| 1556202_at   | SRGAP2    | SLIT-ROBO Rho GTPase activating protein 2             | 0.2784 | 0.0458 |
| 1556204_a_at | ZNF814    | Zinc finger protein 814                               | 0.2781 | 0.0017 |
| 1556211_a_at |           | CDNA FLJ38810 fis; clone LIVER2006251                 | 0.6249 | 0.0213 |
| 1556212_x_at |           | CDNA FLJ38810 fis; clone LIVER2006251                 | 0.2669 | 0.044  |
| 1556277_a_at | PAPD4     | PAP associated domain containing 4                    | 1.3442 | 0.0004 |
| 1556282_at   | FGFR1OP2  | FGFR1 oncogene partner 2                              | 0.251  | 0.0311 |
| 1556301_at   |           | CDNA clone IMAGE:5288145                              | 0.6764 | 0.0001 |
| 1556306_at   |           | Chromosome 7 unknown mRNA                             | 0.803  | 0.0166 |
| 1556318_s_at |           | Full length insert cDNA YQ07B06                       | 0.7486 | 0.0228 |
| 1556322_a_at |           | Full length insert cDNA clone YU27F12                 | 0.2966 | 0.0183 |
| 1556331_a_at |           | CDNA clone IMAGE:5259142                              | 0.6612 | 0.0323 |
| 1556336_at   | RBMX      | RNA binding motif protein; X-linked                   | 0.5184 | 0.0425 |
| 1556338_at   |           | CDNA FLJ39845 fis; clone SPLEN2014452                 | 1.0081 | 0.0021 |
| 1556339_a_at |           | CDNA FLJ39845 fis; clone SPLEN2014452                 | 0.6995 | 0.0061 |
| 1556345_s_at |           | Full length insert cDNA clone ZE07C03                 | 0.575  | 0.0017 |
| 1556347_at   |           | Full length insert cDNA clone ZD70G04                 | 0.7396 | 0.0058 |
| 1556357_s_at | ERICH1    | glutamate-rich 1                                      | 0.1702 | 0.0458 |
| 1556373_a_at | MGC35361  | Hypothetical MGC35361                                 | 0.5666 | 0.0412 |
| 1556404_a_at | LOC441208 | hypothetical gene supported by AK094370               | 0.1853 | 0.0009 |
| 1556416_s_at |           | Full length insert cDNA clone ZD37D10                 | 1.0698 | 0.0045 |
| 1556423_at   | VASH1     | Vasohibin 1                                           | 0.5645 | 0.017  |
| 1556429_a_at | WDR67     | WD repeat domain 67                                   | 0.2359 | 0.0395 |
| 1556432_at   |           | CDNA FLJ35329 fis; clone PROST2013873                 | 0.2602 | 0.0172 |
| 1556434_at   |           | CDNA FLJ25798 fis; clone TST07050                     | 0.2248 | 0.0148 |
| 1556527_a_at |           | CDNA clone IMAGE:4402168                              | 1.2137 | 0.0021 |
| 1556543_at   |           | Full length insert cDNA clone YW18F01                 | 1.0659 | 0.0044 |

|              |         |                                                                            |        |        |
|--------------|---------|----------------------------------------------------------------------------|--------|--------|
| 1556551_s_at | SLC39A6 | solute carrier family 39 (zinc transporter); member 6                      | 1.3011 | 0.0028 |
| 1556629_a_at | SNAP25  | Synaptosomal-associated protein; 25kDa                                     | 2.1811 | 0.0015 |
| 1556646_at   |         |                                                                            | 1.3989 | 0.0001 |
| 1556657_at   |         | CDNA FLJ36459 fis; clone THYMU2014762                                      | 0.3444 | 0.0369 |
| 1556658_a_at |         | CDNA FLJ36459 fis; clone THYMU2014762                                      | 0.633  | 0.0247 |
| 1556659_at   |         | CDNA FLJ33647 fis; clone BRAMY2024374                                      | 0.4686 | 0.0172 |
| 1556678_a_at |         | Full length insert cDNA clone ZD41C11                                      | 0.4775 | 0.0255 |
| 1556682_s_at |         | Full length insert cDNA clone ZD73H04                                      | 0.3172 | 0.0206 |
| 1556715_at   | PRPSAP1 | Phosphoribosyl pyrophosphate synthetase-associated protein 1               | 0.5874 | 0.0066 |
| 1556743_at   | ZNF654  | zinc finger protein 654                                                    | 0.5756 | 0.0041 |
| 1556744_a_at | ZNF654  | zinc finger protein 654                                                    | 1.4473 | 0.0003 |
| 1556781_at   |         | I.M.A.G.E. clone 120151; mRNA sequence                                     | 0.1682 | 0.0075 |
| 1556783_a_at |         | Full length insert cDNA clone YY49D02                                      | 0.5785 | 0.0003 |
| 1556794_at   |         | CDNA FLJ33615 fis; clone BRAMY2018396                                      | 0.3702 | 0.0052 |
| 1556804_s_at | POLR3B  | polymerase (RNA) III (DNA directed) polypeptide B                          | 0.243  | 0.0156 |
| 1556815_at   |         | Full length insert cDNA clone ZB72E12                                      | 0.2977 | 0.0014 |
| 1556820_a_at | DLEU2   | deleted in lymphocytic leukemia; 2                                         | 0.8055 | 0.011  |
| 1556821_x_at | DLEU2   | deleted in lymphocytic leukemia; 2                                         | 0.8255 | 0.0201 |
| 1556828_at   |         | CDNA FLJ36457 fis; clone THYMU2014500                                      | 0.3089 | 0.0018 |
| 1556831_at   | DYNC1H1 | Dynein; cytoplasmic 1; heavy chain 1                                       | 0.1883 | 0.0003 |
| 1556834_at   |         | CDNA clone IMAGE:5296106                                                   | 0.1255 | 0.026  |
| 1556849_at   |         | CDNA FLJ11909 fis; clone HEMBB1000099                                      | 0.3185 | 0.0491 |
| 1556911_at   |         | Homo sapiens; clone IMAGE:5493056; mRNA                                    | 0.338  | 0.0394 |
| 1556925_at   | SMC3    | Structural maintenance of chromosomes 3                                    | 0.3152 | 0.0053 |
| 1556938_a_at |         | CDNA FLJ38433 fis; clone FEBRA2014578                                      | 0.3871 | 0.0018 |
| 1556984_at   |         | Full length insert cDNA clone YU27A09                                      | 0.2489 | 0.0131 |
| 1557012_a_at |         | CDNA clone IMAGE:4816709                                                   | 0.5652 | 0.0002 |
| 1557036_at   | ZBTB1   | Zinc finger and BTB domain containing 1                                    | 0.3109 | 0.0008 |
| 1557044_at   |         | CDNA clone IMAGE:5301514                                                   | 0.1533 | 0.0495 |
| 1557046_x_at |         | CDNA clone IMAGE:5301514                                                   | 0.231  | 0.0096 |
| 1557062_at   |         | Full-length cDNA clone CS0DF025YH20 of Fetal brain of Homo sapiens (human) | 0.3708 | 0.0376 |
| 1557066_at   | LUC7L   | LUC7-like (S. cerevisiae)                                                  | 0.6883 | 0.0029 |
| 1557071_s_at | NUB1    | negative regulator of ubiquitin-like proteins 1                            | 0.5414 | 0.0028 |

|              |           |                                                                                                                                                       |        |        |
|--------------|-----------|-------------------------------------------------------------------------------------------------------------------------------------------------------|--------|--------|
| 1557073_s_at | TTBK2     | Tau tubulin kinase 2                                                                                                                                  | 1.1851 | 0.0011 |
| 1557091_at   | FLJ36070  | likely ortholog of MEF2-activating SAP transcriptional regulator                                                                                      | 1.9742 | 0.0002 |
| 1557098_s_at | HAR1A     | highly accelerated region 1A (non-protein-coding RNA)                                                                                                 | 0.9549 | 0.0124 |
| 1557129_a_at | FAM111B   | family with sequence similarity 111; member B                                                                                                         | 0.2392 | 0.024  |
| 1557139_at   |           | CDNA FLJ39041 fis; clone NT2RP7010109                                                                                                                 | 0.1728 | 0.0132 |
| 1557158_s_at | MLL3      | myeloid/lymphoid or mixed-lineage leukemia 3                                                                                                          | 0.5255 | 0.0019 |
| 1557164_a_at |           | Full length insert cDNA clone ZD68D12                                                                                                                 | 1.196  | 0.0001 |
| 1557166_at   | PDCD4     | programmed cell death 4 (neoplastic transformation inhibitor)                                                                                         | 0.6397 | 0.006  |
| 1557174_a_at |           | CDNA FLJ39542 fis; clone PUAEN2008815                                                                                                                 | 0.516  | 0.0095 |
| 1557189_at   | DNASE1    | deoxyribonuclease I                                                                                                                                   | 0.1978 | 0.0028 |
| 1557196_a_at |           | MRNA; cDNA DKFZp547B198 (from clone DKFZp547B198)                                                                                                     | 0.3227 | 0.0064 |
| 1557218_s_at | FANCB     | Fanconi anemia; complementation group B                                                                                                               | 0.263  | 0.0028 |
| 1557224_at   |           | CDNA FLJ30981 fis; clone HHDPC2000258                                                                                                                 | 0.8331 | 0.0072 |
| 1557227_s_at | TPR       | translocated promoter region (to activated MET oncogene)                                                                                              | 0.7069 | 0.0364 |
| 1557239_at   |           | Full length insert cDNA clone YW25E05                                                                                                                 | 1.3779 | 0.0019 |
| 1557240_a_at |           | Full length insert cDNA clone YW25E05                                                                                                                 | 1.3273 | 0.0125 |
| 1557242_at   |           | MRNA expressed in skin fibroblast                                                                                                                     | 1.2932 | 0.0003 |
| 1557267_s_at | LOC284952 | hypothetical protein LOC284952                                                                                                                        | 0.4193 | 0.0038 |
| 1557270_at   |           | CDNA FLJ36375 fis; clone THYMU2008226                                                                                                                 | 2.0298 | 0.0002 |
| 1557278_s_at | TNPO1     | Transportin 1                                                                                                                                         | 0.3058 | 0.0028 |
| 1557283_a_at | ZNF519    | zinc finger protein 519                                                                                                                               | 0.3859 | 0.0435 |
| 1557289_s_at | GTF2IRD2  | GTF2I repeat domain containing 2                                                                                                                      | 0.1921 | 0.0262 |
| 1557290_at   | DPY19L2   | dpy-19-like 2 (C. elegans), dpy-19-like 2 pseudogene 1 (C. elegans), dpy-19-like 2 pseudogene 2 (C. elegans), dpy-19-like 2 pseudogene 4 (C. elegans) | 0.2779 | 0.0008 |
| 1557300_s_at |           | CDNA FLJ34138 fis; clone FCBBF3011003                                                                                                                 | 1.2732 | 0.0011 |
| 1557301_a_at |           | CDNA FLJ33905 fis; clone CTONG2008405                                                                                                                 | 0.1689 | 0.0163 |
| 1557302_at   |           | CDNA FLJ33255 fis; clone ASTRO2005553                                                                                                                 | 0.7481 | 0.0247 |
| 1557311_at   |           | CDNA FLJ40469 fis; clone TESTI2042473                                                                                                                 | 0.3921 | 0.0249 |
| 1557314_at   |           | CDNA clone IMAGE:5303069                                                                                                                              | 0.1555 | 0.0344 |
| 1557322_at   | ZNF230    | zinc finger protein 230                                                                                                                               | 0.6354 | 0.0234 |
| 1557350_at   | G3BP1     | GTPase activating protein (SH3 domain) binding protein 1                                                                                              | 0.6949 | 0.0214 |
| 1557352_at   | SQLE      | Squalene epoxidase                                                                                                                                    | 1.7743 | 0.0085 |
| 1557363_a_at | PHIP      | pleckstrin homology domain interacting protein                                                                                                        | 0.3201 | 0.0019 |



|              |           |                                                           |        |        |
|--------------|-----------|-----------------------------------------------------------|--------|--------|
| 1557366_at   | CCDC144B  | coiled-coil domain containing 144B                        | 0.4775 | 0.0273 |
| 1557385_at   | FLJ13305  | hypothetical protein FLJ13305                             | 0.6373 | 0.008  |
| 1557409_at   |           | CDNA FLJ45930 fis; clone PLACE7000707                     | 0.6397 | 0.0033 |
| 1557415_s_at | LETM2     | leucine zipper-EF-hand containing transmembrane protein 2 | 0.2851 | 0.0108 |
| 1557430_at   | LOC147670 | hypothetical protein LOC147670                            | 0.627  | 0.002  |
| 1557438_at   |           | CDNA clone IMAGE:5285425                                  | 0.2081 | 0.0394 |
| 1557466_at   | FLJ31104  | Hypothetical gene supported by AK055666; BC039324         | 0.1101 | 0.0292 |
| 1557478_at   |           | CDNA FLJ25058 fis; clone CBL04608                         | 0.9881 | 0.0094 |
| 1557504_at   |           | Full length insert cDNA YQ11E04                           | 0.5222 | 0.0161 |
| 1557505_a_at |           | Full length insert cDNA YQ11E04                           | 0.927  | 0.0068 |
| 1557512_at   |           | Full length insert cDNA YQ02G04                           | 0.4929 | 0.0061 |
| 1557521_a_at |           | CDNA clone IMAGE:5311184                                  | 0.447  | 0.0209 |
| 1557543_at   |           | MRNA; cDNA DKFZp313P2412 (from clone DKFZp313P2412)       | 0.7655 | 0.0039 |
| 1557555_at   |           | CDNA FLJ12016 fis; clone HEMBB1001707                     | 0.1843 | 0.016  |
| 1557558_s_at | MATN1     | Matrilin 1; cartilage matrix protein                      | 0.3915 | 0.0056 |
| 1557562_at   | GRIPAP1   | GRIP1 associated protein 1                                | 0.2443 | 0.0051 |
| 1557571_at   | VPS13D    | Vacuolar protein sorting 13 homolog D (S. cerevisiae)     | 0.1211 | 0.0318 |
| 1557580_at   |           | CDNA clone IMAGE:3923254                                  | 0.4603 | 0.0066 |
| 1557581_x_at |           | CDNA clone IMAGE:3923254                                  | 0.2563 | 0.0173 |
| 1557585_at   | ATP6V1H   | ATPase; H+ transporting; lysosomal 50/57kDa; V1 subunit H | 0.3653 | 0.0081 |
| 1557586_s_at | ATP6V1H   | ATPase; H+ transporting; lysosomal 50/57kDa; V1 subunit H | 0.6499 | 0.0044 |
| 1557637_at   |           | CDNA clone IMAGE:5267718                                  | 0.2529 | 0.0139 |
| 1557638_at   |           | CDNA clone IMAGE:4793048                                  | 0.1063 | 0.0477 |
| 1557644_at   |           | CDNA FLJ30692 fis; clone FCBBF2000677                     | 0.3998 | 0.0035 |
| 1557685_at   | C4orf38   | chromosome 4 open reading frame 38                        | 0.433  | 0.018  |
| 1557692_a_at |           | CDNA clone IMAGE:5298801                                  | 0.1361 | 0.0083 |
| 1557698_at   |           | Homo sapiens; clone IMAGE:4043992; mRNA                   | 0.3768 | 0.0025 |
| 1557699_x_at |           | Homo sapiens; clone IMAGE:4043992; mRNA                   | 0.4026 | 0.0105 |
| 1557701_s_at | POLH      | polymerase (DNA directed); eta                            | 0.3111 | 0.0088 |
| 1557737_s_at | NKTR      | natural killer-tumor recognition sequence                 | 0.6299 | 0.0043 |
| 1557744_at   |           | CDNA FLJ25841 fis; clone TST08665                         | 0.388  | 0.035  |
| 1557765_at   | LOC643401 | hypothetical protein LOC643401                            | 1.037  | 0.0206 |
| 1557772_at   |           | CDNA clone IMAGE:4826031                                  | 0.3169 | 0.0338 |
| 1557780_at   |           | MRNA; cDNA DKFZp564C1072 (from clone DKFZp564C1072)       | 0.1697 | 0.0321 |
| 1557798_at   | TMEM4     | Transmembrane protein 4                                   | 0.1665 | 0.0048 |
| 1557805_at   |           | Full length insert cDNA clone YT85B06                     | 0.467  | 0.0229 |

|              |           |                                                                        |        |        |
|--------------|-----------|------------------------------------------------------------------------|--------|--------|
| 1557809_a_at |           | Full length insert cDNA clone YF46C08                                  | 0.162  | 0.0453 |
| 1557813_at   |           | Full length insert cDNA clone YB34C04                                  | 2.1534 | 0.0002 |
| 1557814_a_at |           | Full length insert cDNA clone YB34C04                                  | 1.1014 | 0.0034 |
| 1557828_a_at | LOC646916 | hypothetical protein LOC646916                                         | 2.2934 | 0      |
| 1557830_at   |           | CDNA FLJ10112 fis; clone HEMBA1002750                                  | 0.7803 | 0.012  |
| 1557835_at   |           | CDNA FLJ31592 fis; clone NT2RI2002447                                  | 0.8018 | 0.0181 |
| 1557883_a_at |           | CDNA FLJ30446 fis; clone BRACE2009255                                  | 0.1444 | 0.0134 |
| 1557889_at   |           | CDNA clone IMAGE:4138742                                               | 0.202  | 0.0349 |
| 1557891_s_at | LOC729178 | hypothetical protein LOC729178                                         | 0.1753 | 0.0214 |
| 1557895_at   | FLJ35934  | FLJ35934 protein                                                       | 0.4404 | 0.0094 |
| 1557918_s_at | SLC16A1   | solute carrier family 16; member 1 (monocarboxylic acid transporter 1) | 1.1497 | 0.0089 |
| 1557984_s_at | RPAP3     | RNA polymerase II associated protein 3                                 | 0.9154 | 0.005  |
| 1557985_s_at | CEP78     | centrosomal protein 78kDa                                              | 0.4385 | 0.0163 |
| 1557987_at   | LOC641298 | PI-3-kinase-related kinase SMG-1 - like locus                          | 1.5314 | 0.0001 |
| 1557991_at   | METTL6    | methyltransferase like 6                                               | 0.2913 | 0.0001 |
| 1557996_at   |           |                                                                        | 1.5357 | 0      |
| 1558014_s_at | MLSTD2    | male sterility domain containing 2                                     | 0.6031 | 0.0401 |
| 1558015_s_at | ACTR2     | ARP2 actin-related protein 2 homolog (yeast)                           | 1.1072 | 0.0164 |
| 1558027_s_at | PRKAB2    | protein kinase; AMP-activated; beta 2 non-catalytic subunit            | 2.0154 | 0.0001 |
| 1558028_x_at | LOC647979 | hypothetical protein LOC647979                                         | 0.8459 | 0.009  |
| 1558044_s_at | EXOSC6    | Exosome component 6                                                    | 0.621  | 0.0114 |
| 1558075_at   | LOC399491 | LOC399491 protein                                                      | 0.4489 | 0.0181 |
| 1558076_at   | ANKRD32   | ankyrin repeat domain 32                                               | 0.3371 | 0.0011 |
| 1558078_at   |           | Homo sapiens; clone IMAGE:3925788; mRNA                                | 1.3521 | 0      |
| 1558088_a_at | UBE2I     | ubiquitin-conjugating enzyme E2I (UBC9 homolog; yeast)                 | 0.4641 | 0.0066 |
| 1558093_s_at | LOC727839 | matrin 3, similar to Matrin-3 (Nuclear scaffold protein P130/MAT3)     | 1.293  | 0.0096 |
| 1558111_at   | MBNL1     | muscleblind-like (Drosophila)                                          | 0.6618 | 0.0263 |
| 1558115_at   | RECK      | reversion-inducing-cysteine-rich protein with kazal motifs             | 0.2566 | 0.026  |
| 1558117_s_at | USP31     | ubiquitin specific peptidase 31                                        | 0.4652 | 0.0383 |
| 1558122_s_at |           | CDNA FLJ39178 fis; clone OCBBF2004104                                  | 0.4574 | 0.029  |
| 1558123_at   | FLJ35390  | hypothetical protein FLJ35390                                          | 0.2861 | 0.0304 |
| 1558139_at   | FLJ39632  | hypothetical LOC642477                                                 | 1.175  | 0.0013 |
| 1558163_at   | PEX13     | Peroxisome biogenesis factor 13                                        | 0.2724 | 0.0152 |
| 1558164_s_at | PEX13     | Peroxisome biogenesis factor 13                                        | 0.7924 | 0.0102 |
| 1558184_s_at | ZNF17     | zinc finger protein 17                                                 | 0.7147 | 0.0044 |
| 1558217_at   | SLFN13    | schlafen family member 13                                              | 1.5892 | 0.0032 |

|              |           |                                                                                          |        |        |
|--------------|-----------|------------------------------------------------------------------------------------------|--------|--------|
| 1558249_s_at | STX16     | syntaxin 16                                                                              | 0.7379 | 0.0073 |
| 1558251_a_at | ZNF587    | zinc finger protein 587                                                                  | 0.3326 | 0.0196 |
| 1558253_x_at | ZNF587    | zinc finger protein 587                                                                  | 0.4764 | 0.0016 |
| 1558254_s_at | SRPK2     | SFRS protein kinase 2                                                                    | 1.4704 | 0.0007 |
| 1558256_at   | LOC148189 | hypothetical protein LOC148189                                                           | 0.5923 | 0.0013 |
| 1558280_s_at | ARHGAP29  | Rho GTPase activating protein 29                                                         | 0.1917 | 0.0263 |
| 1558310_s_at | FLJ90723  | hypothetical protein FLJ90723                                                            | 0.2418 | 0.0432 |
| 1558331_at   | SIRT2     | Sirtuin (silent mating type information regulation 2 homolog) 2 ( <i>S. cerevisiae</i> ) | 1.2982 | 0.0001 |
| 1558346_at   | COX17     | COX17 cytochrome c oxidase assembly homolog ( <i>S. cerevisiae</i> )                     | 0.8521 | 0      |
| 1558354_s_at |           | CDNA clone IMAGE:5260583                                                                 | 0.1635 | 0.0023 |
| 1558365_at   | PGK1      | phosphoglycerate kinase 1                                                                | 1.8608 | 0.0013 |
| 1558369_at   | MPHOSPH9  | M-phase phosphoprotein 9                                                                 | 1.3209 | 0.0004 |
| 1558381_a_at |           | Homo sapiens; clone IMAGE:3830652; mRNA                                                  | 0.2146 | 0.0089 |
| 1558385_at   |           |                                                                                          | 0.4096 | 0.0326 |
| 1558391_s_at | ZNF599    | zinc finger protein 599                                                                  | 0.2933 | 0.0002 |
| 1558394_s_at | KRT7      | keratin 7                                                                                | 0.1919 | 0.0377 |
| 1558401_at   |           | CDNA FLJ37332 fis; clone BRAMY2019710                                                    | 0.6324 | 0.0445 |
| 1558426_x_at | Orai2     | ORAI calcium release-activated calcium modulator 2                                       | 0.8232 | 0.0029 |
| 1558444_at   |           | CDNA FLJ35140 fis; clone PLACE6009524                                                    | 1.2556 | 0.0101 |
| 1558466_at   |           | Clone IMAGE:125405; mRNA sequence                                                        | 0.3595 | 0.0495 |
| 1558474_at   |           | CDNA FLJ38034 fis; clone CTONG2013393                                                    | 0.3419 | 0.0269 |
| 1558486_at   | ZNF493    | zinc finger protein 493                                                                  | 1.0355 | 0.0271 |
| 1558504_at   |           | Full length insert cDNA clone ZE14C04                                                    | 0.2234 | 0.0356 |
| 1558515_at   |           | CDNA clone IMAGE:4328048                                                                 | 1.3805 | 0.0082 |
| 1558518_at   | MAP3K7IP3 | mitogen-activated protein kinase kinase kinase 7 interacting protein 3                   | 0.181  | 0.016  |
| 1558519_at   | FLJ23861  | Hypothetical protein FLJ23861, Ribulose-5-phosphate-3-epimerase                          | 0.1546 | 0.0049 |
| 1558522_at   |           | Homo sapiens; clone IMAGE:3459334; mRNA                                                  | 0.7879 | 0.043  |
| 1558523_at   | C6orf60   | chromosome 6 open reading frame 60                                                       | 0.2656 | 0.0152 |
| 1558603_at   | PLGLB2    | plasminogen-like B2                                                                      | 0.1417 | 0.0134 |
| 1558604_a_at |           | MRNA; clone CD 43T7                                                                      | 0.9697 | 0.015  |
| 1558605_at   |           | CDNA clone IMAGE:4819775                                                                 | 0.7072 | 0.0334 |
| 1558606_s_at |           | CDNA clone IMAGE:4819775                                                                 | 0.163  | 0.0162 |
| 1558620_at   | ZNF621    | zinc finger protein 621                                                                  | 0.5456 | 0.0243 |
| 1558622_a_at | ZNF548    | zinc finger protein 548                                                                  | 0.3727 | 0.0047 |
| 1558626_at   |           | CDNA clone IMAGE:3628701                                                                 | 0.4687 | 0.0483 |
| 1558651_at   |           | CDNA FLJ35273 fis; clone PROST2006020                                                    | 0.2452 | 0.0126 |

|              |           |                                                                                                                                                         |        |        |
|--------------|-----------|---------------------------------------------------------------------------------------------------------------------------------------------------------|--------|--------|
| 1558673_s_at | ZNF77     | zinc finger protein 77                                                                                                                                  | 0.3839 | 0.0064 |
| 1558695_at   |           | Full length insert cDNA clone YR58H12                                                                                                                   | 1.8088 | 0.0019 |
| 1558699_a_at | HERPUD2   | HERPUD family member 2                                                                                                                                  | 0.5242 | 0.0102 |
| 1558700_s_at | ZNF260    | zinc finger protein 260                                                                                                                                 | 0.9136 | 0.0049 |
| 1558719_s_at |           | CDNA FLJ30490 fis; clone BRAWH2000169                                                                                                                   | 0.3524 | 0.0391 |
| 1558738_at   | NOL3      | Nucleolar protein 3 (apoptosis repressor with CARD domain)                                                                                              | 1.0402 | 0.0323 |
| 1558747_at   | SMCHD1    | structural maintenance of chromosomes flexible hinge domain containing 1                                                                                | 0.8238 | 0.0245 |
| 1558748_at   |           | MRNA; cDNA DKFZp686E1027 (from clone DKFZp686E1027)                                                                                                     | 1.0765 | 0.003  |
| 1558750_a_at |           | CDNA FLJ34964 fis; clone NTONG2004095                                                                                                                   | 0.7771 | 0.0038 |
| 1558755_x_at | ZNF763    | zinc finger protein 763                                                                                                                                 | 0.6927 | 0.0093 |
| 1558801_at   |           | Homo sapiens; clone IMAGE:2900205; mRNA                                                                                                                 | 1.1382 | 0.0008 |
| 1558809_s_at | LOC284408 | hypothetical protein LOC284408                                                                                                                          | 0.7098 | 0.0024 |
| 1558816_at   | ZNF664    | zinc finger protein 664                                                                                                                                 | 0.4774 | 0.002  |
| 1558831_x_at |           | CDNA FLJ34403 fis; clone HCHON2001607                                                                                                                   | 0.3072 | 0.0007 |
| 1558841_at   | SDCCAG10  | serologically defined colon cancer antigen 10                                                                                                           | 0.1581 | 0.0459 |
| 1558854_a_at |           | MRNA; cDNA DKFZp667D0824 (from clone DKFZp667D0824)                                                                                                     | 0.6236 | 0.0272 |
| 1558859_at   | LOC222159 | hypothetical protein LOC222159                                                                                                                          | 0.2147 | 0.0348 |
| 1558922_at   |           | Full length insert cDNA clone YF43G08                                                                                                                   | 0.9083 | 0.0059 |
| 1558937_s_at |           | MRNA (fetal brain cDNA b2_2g)                                                                                                                           | 1.1431 | 0.0001 |
| 1558943_x_at | ZNF765    | zinc finger protein 765                                                                                                                                 | 0.5726 | 0.049  |
| 1558953_s_at | CEP164    | centrosomal protein 164kDa                                                                                                                              | 0.9014 | 0.0145 |
| 1558959_at   |           | CDNA FLJ37917 fis; clone CTONG1000137                                                                                                                   | 0.2932 | 0.0324 |
| 1558996_at   | FOXP1     | forkhead box P1                                                                                                                                         | 0.3165 | 0.0164 |
| 1558999_x_at | LOC283922 | hypothetical protein LOC283922, pyruvate dehydrogenase phosphatase regulatory subunit, similar to pyruvate dehydrogenase phosphatase regulatory subunit | 0.3994 | 0.0017 |
| 1559006_at   |           | CDNA clone IMAGE:4304686                                                                                                                                | 1.0721 | 0.0004 |
| 1559007_s_at |           | CDNA clone IMAGE:4304686                                                                                                                                | 0.648  | 0.0058 |
| 1559042_at   | NDUFB6    | NADH dehydrogenase (ubiquinone) 1 beta subcomplex; 6; 17kDa                                                                                             | 0.367  | 0.0002 |
| 1559044_at   | EXOSC1    | exosome component 1                                                                                                                                     | 0.1601 | 0.0246 |
| 1559045_at   |           | CDNA FLJ37541 fis; clone BRCAN2026340                                                                                                                   | 0.3534 | 0.0012 |
| 1559054_a_at |           | Homo sapiens; clone IMAGE:5199859; mRNA                                                                                                                 | 0.3124 | 0.0001 |
| 1559059_s_at | ZNF611    | Zinc finger protein 611                                                                                                                                 | 0.2162 | 0.0028 |
| 1559078_at   | BCL11A    | B-cell CLL/lymphoma 11A (zinc finger protein)                                                                                                           | 0.6948 | 0.0423 |
| 1559102_at   |           | CDNA clone IMAGE:4791593                                                                                                                                | 0.4687 | 0.0016 |

|              |           |                                                                                                 |        |        |
|--------------|-----------|-------------------------------------------------------------------------------------------------|--------|--------|
| 1559103_s_at |           | CDNA clone IMAGE:4791593                                                                        | 0.3782 | 0.0187 |
| 1559109_a_at |           | CDNA FLJ32270 fis; clone PROST1000527                                                           | 0.1314 | 0.0062 |
| 1559128_at   | HSDL2     | hydroxysteroid dehydrogenase like 2                                                             | 0.5057 | 0.036  |
| 1559132_at   |           |                                                                                                 | 0.188  | 0.0274 |
| 1559154_at   |           | CDNA FLJ40682 fis; clone THYMU2023264                                                           | 0.4927 | 0.0225 |
| 1559161_at   |           | CDNA FLJ38294 fis; clone FCBBF3010211                                                           | 0.4495 | 0.0068 |
| 1559171_at   | LOC147080 | hypothetical protein LOC147080                                                                  | 0.228  | 0.0198 |
| 1559180_at   | HOMER2    | Homer homolog 2 (Drosophila)                                                                    | 0.2123 | 0.0075 |
| 1559190_s_at | RDH13     | MRNA; cDNA DKFZp313H0740 (from clone DKFZp313H0740), Retinol dehydrogenase 13 (all-trans/9-cis) | 1.1046 | 0.0081 |
| 1559203_s_at | KRAS      | v-Ki-ras2 Kirsten rat sarcoma viral oncogene homolog                                            | 0.3589 | 0.0004 |
| 1559214_at   |           | MRNA full length insert cDNA clone EUROIIMAGE 839551                                            | 0.9474 | 0.001  |
| 1559222_at   |           | CDNA FLJ30725 fis; clone FCBBF4000415                                                           | 0.327  | 0.0028 |
| 1559259_at   |           | Clone IMAGE:418054; mRNA sequence                                                               | 0.469  | 0.0034 |
| 1559270_at   | ZFHX4     | zinc finger homeobox 4                                                                          | 0.1974 | 0.0009 |
| 1559307_s_at | RBL1      | retinoblastoma-like 1 (p107)                                                                    | 0.1945 | 0.0037 |
| 1559331_x_at |           | CDNA FLJ25030 fis; clone CBL02631                                                               | 0.1642 | 0.0089 |
| 1559369_at   | FLJ13611  | hypothetical protein FLJ13611                                                                   | 0.1976 | 0.0093 |
| 1559384_at   |           | Transcribed locus                                                                               | 0.1102 | 0.0249 |
| 1559406_at   | ANKRD18A  | ankyrin repeat domain 18A                                                                       | 0.2343 | 0.0016 |
| 1559410_at   |           | Transcribed locus                                                                               | 0.9892 | 0.0485 |
| 1559413_at   | TCP11L2   | t-complex 11 (mouse)-like 2                                                                     | 0.5908 | 0.0471 |
| 1559444_at   |           | MRNA; cDNA DKFZp666H208 (from clone DKFZp666H208)                                               | 0.1706 | 0.0279 |
| 1559449_a_at | ZNF254    | Zinc finger protein 254                                                                         | 0.2812 | 0.0321 |
| 1559455_at   |           | CDNA FLJ34603 fis; clone KIDNE2013388                                                           | 0.6563 | 0.0005 |
| 1559462_at   |           | Homo sapiens; clone IMAGE:6155889; mRNA                                                         | 1.7909 | 0.0182 |
| 1559491_at   |           | MRNA; cDNA DKFZp761L149 (from clone DKFZp761L149)                                               | 0.5288 | 0.0232 |
| 1559494_at   |           | CDNA FLJ38710 fis; clone KIDNE2002980                                                           | 0.1372 | 0.0175 |
| 1559496_at   | PPA2      | Pyrophosphatase (inorganic) 2                                                                   | 1.6805 | 0.0002 |
| 1559500_at   | VPS8      | vacuolar protein sorting 8 homolog (S. cerevisiae)                                              | 0.5001 | 0.0003 |
| 1559513_a_at | FANCC     | Fanconi anemia; complementation group C                                                         | 0.1498 | 0.0008 |
| 1559523_at   |           | CDNA clone IMAGE:4821044                                                                        | 0.2582 | 0.0001 |
| 1559524_at   |           | MRNA; cDNA DKFZp566N0924 (from clone DKFZp566N0924)                                             | 0.4653 | 0.0009 |
| 1559528_at   | PCGF3     | Polycomb group ring finger 3                                                                    | 0.1665 | 0.0187 |
| 1559529_at   | PTK2      | PTK2 protein tyrosine kinase 2                                                                  | 1.0478 | 0.0044 |

|              |           |                                                                   |        |        |
|--------------|-----------|-------------------------------------------------------------------|--------|--------|
| 1559532_at   | LOC646450 | hypothetical LOC646450                                            | 0.2021 | 0.0486 |
| 1559534_at   |           | Homo sapiens; clone IMAGE:5743779; mRNA                           | 0.5053 | 0.0016 |
| 1559535_s_at |           | Homo sapiens; clone IMAGE:5743779; mRNA                           | 0.6123 | 0.0022 |
| 1559565_x_at |           | MRNA; cDNA DKFZp686K1037 (from clone DKFZp686K1037)               | 0.1378 | 0.0415 |
| 1559585_at   | FLJ31033  | hypothetical protein FLJ31033                                     | 0.1303 | 0.0175 |
| 1559589_a_at |           | CDNA FLJ37400 fis; clone BRAMY2027714                             | 0.1953 | 0.0047 |
| 1559598_at   |           | CDNA FLJ38424 fis; clone FEBRA2012090                             | 0.6336 | 0.0005 |
| 1559600_at   |           | MRNA; cDNA DKFZp547G2314 (from clone DKFZp547G2314)               | 0.2517 | 0.0446 |
| 1559606_at   | GBP6      | Guanylate binding protein family; member 6                        | 0.1083 | 0.0414 |
| 1559691_at   |           | CDNA clone IMAGE:3869664                                          | 0.5243 | 0.0116 |
| 1559707_at   |           | MRNA; cDNA DKFZp434J0927 (from clone DKFZp434J0927)               | 0.2317 | 0.0034 |
| 1559820_at   | ATG10     | ATG10 autophagy related 10 homolog (S. cerevisiae)                | 0.5311 | 0.0192 |
| 1559876_at   |           | Homo sapiens; clone IMAGE:4347394; mRNA                           | 0.2853 | 0.0025 |
| 1559881_s_at | ZNF12     | zinc finger protein 12                                            | 1.9694 | 0      |
| 1559890_a_at | ABI1      | abl-interactor 1                                                  | 0.1171 | 0.0076 |
| 1559893_at   | CCDC75    | coiled-coil domain containing 75                                  | 0.263  | 0.0443 |
| 1559932_at   |           | Full length insert cDNA clone YR28G06                             | 0.3905 | 0.0001 |
| 1559954_s_at | DDX42     | DEAD (Asp-Glu-Ala-Asp) box polypeptide 42                         | 0.9078 | 0.0447 |
| 1559964_at   | FLJ38717  | FLJ38717 protein                                                  | 0.7935 | 0.0009 |
| 1560006_a_at | LOC646762 | hypothetical protein LOC646762                                    | 0.2213 | 0.032  |
| 1560013_at   | PDXDC1    | pyridoxal-dependent decarboxylase domain containing 1             | 0.5025 | 0.0078 |
| 1560017_at   | TMTC3     | transmembrane and tetratricopeptide repeat containing 3           | 0.4976 | 0.0002 |
| 1560020_at   | DNAJC13   | DnaJ (Hsp40) homolog; subfamily C; member 13                      | 0.1504 | 0.0091 |
| 1560033_at   | MCCC2     | methylcrotonoyl-Coenzyme A carboxylase 2 (beta)                   | 0.2889 | 0.0025 |
| 1560034_a_at |           | MRNA; cDNA DKFZp313E1515 (from clone DKFZp313E1515)               | 0.1366 | 0.0227 |
| 1560089_at   | LOC286208 | hypothetical protein LOC286208                                    | 0.6142 | 0.0213 |
| 1560116_a_at | NEDD1     | neural precursor cell expressed; developmentally down-regulated 1 | 1.2771 | 0      |
| 1560145_at   | MKLN1     | Muskelin 1; intracellular mediator containing kelch motifs        | 0.8792 | 0.0106 |
| 1560171_at   |           | CDNA FLJ32354 fis; clone PROST2007818                             | 0.4659 | 0.0194 |
| 1560172_at   | INTS10    | integrator complex subunit 10                                     | 0.2421 | 0.0067 |
| 1560201_at   | ZNF713    | zinc finger protein 713                                           | 0.3674 | 0.003  |
| 1560222_at   |           | CDNA clone IMAGE:3846805                                          | 0.3555 | 0.0039 |
| 1560224_at   | AHCTF1    | AT hook containing transcription factor 1                         | 0.3515 | 0.006  |
| 1560258_a_at |           | Homo sapiens; clone IMAGE:5590287; mRNA                           | 0.5169 | 0.0404 |

|              |           |                                                                                                                                                       |        |        |
|--------------|-----------|-------------------------------------------------------------------------------------------------------------------------------------------------------|--------|--------|
| 1560290_at   |           | Homo sapiens; clone IMAGE:5480271; mRNA                                                                                                               | 0.344  | 0.0011 |
| 1560297_at   |           | Homo sapiens; clone IMAGE:4043205; mRNA                                                                                                               | 0.3921 | 0.0168 |
| 1560316_s_at | GLCCI1    | glucocorticoid induced transcript 1                                                                                                                   | 0.2209 | 0.0257 |
| 1560318_at   | ARHGAP29  | Rho GTPase activating protein 29                                                                                                                      | 0.1381 | 0.0155 |
| 1560332_at   |           | MRNA; cDNA DKFZp451C0318 (from clone DKFZp451C0318)                                                                                                   | 0.2923 | 0.0194 |
| 1560339_s_at | NAP1L4    | nucleosome assembly protein 1-like 4                                                                                                                  | 0.7127 | 0.0105 |
| 1560340_s_at | LOC441212 | retinitis pigmentosa 9 pseudogene                                                                                                                     | 0.155  | 0.0183 |
| 1560354_at   | CCDC127   | Coiled-coil domain containing 127                                                                                                                     | 0.3408 | 0.0305 |
| 1560358_at   | PHKA2     | phosphorylase kinase; alpha 2 (liver)                                                                                                                 | 1.0451 | 0.0288 |
| 1560372_at   |           | CDNA FLJ34680 fis; clone LIVER2003524                                                                                                                 | 0.1292 | 0.0376 |
| 1560385_x_at |           | CDNA FLJ38270 fis; clone FCBBF3002592                                                                                                                 | 0.1335 | 0.0163 |
| 1560386_at   |           | Homo sapiens; clone IMAGE:5740472; mRNA                                                                                                               | 1.0435 | 0.0004 |
| 1560422_at   |           | CDNA clone IMAGE:4155541                                                                                                                              | 0.3293 | 0.0257 |
| 1560433_at   |           | CDNA FLJ31398 fis; clone NT2NE1000175                                                                                                                 | 1.0432 | 0.0066 |
| 1560434_x_at | CLTA      | clathrin; light chain (Lca)                                                                                                                           | 0.9302 | 0.0054 |
| 1560443_at   |           | CDNA clone IMAGE:3937917                                                                                                                              | 0.3874 | 0.0329 |
| 1560445_x_at | ARHGEF1   | Rho guanine nucleotide exchange factor (GEF) 1                                                                                                        | 0.4135 | 0.0014 |
| 1560474_at   |           | Homo sapiens; clone IMAGE:4294221; mRNA                                                                                                               | 0.3566 | 0      |
| 1560475_at   |           | CDNA FLJ34815 fis; clone NT2NE2007786                                                                                                                 | 0.3138 | 0.0104 |
| 1560492_at   |           | CDNA clone IMAGE:4578339                                                                                                                              | 0.9518 | 0.0052 |
| 1560498_at   |           | Homo sapiens; clone IMAGE:4539309; mRNA                                                                                                               | 0.6912 | 0.041  |
| 1560500_at   |           | CDNA clone IMAGE:5299346                                                                                                                              | 1.025  | 0.0301 |
| 1560509_at   |           | MRNA; cDNA DKFZp547H194 (from clone DKFZp547H194)                                                                                                     | 0.181  | 0.0414 |
| 1560526_at   | PR47      | platelet receptor for type III collagen; 47 kDa                                                                                                       | 0.6264 | 0.0464 |
| 1560556_a_at | PLEKHA8   | Pleckstrin homology domain containing; family A (phosphoinositide binding specific) member 8                                                          | 0.3098 | 0.0086 |
| 1560599_a_at | CCDC123   | coiled-coil domain containing 123                                                                                                                     | 0.3606 | 0.005  |
| 1560654_at   | FLJ37201  | hypothetical protein FLJ37201                                                                                                                         | 0.2735 | 0.0023 |
| 1560659_at   |           |                                                                                                                                                       | 0.7355 | 0.0008 |
| 1560661_x_at |           |                                                                                                                                                       | 0.6772 | 0.0012 |
| 1560665_at   | SCPEP1    | serine carboxypeptidase 1                                                                                                                             | 0.2221 | 0.0291 |
| 1560680_at   | LOC732014 | Similar to Heterogeneous nuclear ribonucleoprotein A1 (Helix-destabilizing protein) (Single-strand RNA-binding protein) (hnRNP core protein A1) (HDP) | 0.5168 | 0.0027 |
| 1560689_s_at | AKT2      | V-akt murine thymoma viral oncogene homolog 2                                                                                                         | 0.5089 | 0.014  |

|              |           |                                                                                              |        |        |
|--------------|-----------|----------------------------------------------------------------------------------------------|--------|--------|
| 1560712_at   | TMPRSS11B | transmembrane protease; serine 11B                                                           | 0.1528 | 0.0042 |
| 1560739_a_at |           | CDNA clone IMAGE:5300703                                                                     | 0.4338 | 0.0354 |
| 1560775_at   |           | CDNA FLJ25185 fis; clone CBR09429                                                            | 0.3886 | 0      |
| 1560814_a_at | CCDC32    | coiled-coil domain containing 32                                                             | 1.2195 | 0.0066 |
| 1560827_at   |           | CDNA clone IMAGE:4820845                                                                     | 0.1503 | 0.0477 |
| 1560926_at   |           | Full length insert cDNA clone YR43G06                                                        | 0.4668 | 0.041  |
| 1560982_at   |           | Full length insert cDNA clone ZD81C11                                                        | 0.7005 | 0.0004 |
| 1560986_a_at |           | Full length insert cDNA clone YW21C01                                                        | 0.3876 | 0.0267 |
| 1560992_at   | LOC400590 | hypothetical LOC400590                                                                       | 0.1844 | 0.029  |
| 1561042_at   | ITGB1     | integrin; beta 1 (fibronectin receptor; beta polypeptide; antigen CD29 includes MDF2; MSK12) | 0.1898 | 0.0243 |
| 1561079_at   | ANKRD28   | ankyrin repeat domain 28                                                                     | 0.9432 | 0.003  |
| 1561121_at   |           | Full length insert cDNA clone ZD64C04                                                        | 0.1666 | 0.0319 |
| 1561130_at   | C12orf51  | Chromosome 12 open reading frame 51                                                          | 0.3069 | 0.0239 |
| 1561149_at   |           | Full length insert cDNA clone ZD75C06                                                        | 0.1672 | 0.0037 |
| 1561152_a_at |           | Full length insert cDNA clone ZC66G12                                                        | 0.1865 | 0.0002 |
| 1561154_at   |           | Full length insert cDNA YU78B07                                                              | 0.1429 | 0.017  |
| 1561155_at   |           | Full length insert cDNA clone ZD60E09                                                        | 0.4142 | 0.0159 |
| 1561177_at   |           | CDNA FLJ14141 fis; clone MAMMA1002868                                                        | 0.2183 | 0.0027 |
| 1561180_at   |           | CDNA FLJ11745 fis; clone HEMBA1005526                                                        | 0.8558 | 0.0328 |
| 1561190_at   | CDKL3     | cyclin-dependent kinase-like 3                                                               | 0.6735 | 0      |
| 1561198_at   | LOC387790 | hypothetical LOC387790                                                                       | 0.2036 | 0.0016 |
| 1561206_at   | KLHL8     | kelch-like 8 (Drosophila)                                                                    | 0.4499 | 0.0211 |
| 1561219_x_at |           | CDNA clone IMAGE:4837157                                                                     | 0.1102 | 0.0396 |
| 1561238_at   | PXMP3     | Peroxisomal membrane protein 3; 35kDa (Zellweger syndrome)                                   | 0.347  | 0.001  |
| 1561346_at   |           | CDNA FLJ32691 fis; clone TESTI2000221                                                        | 0.6057 | 0.001  |
| 1561578_s_at | MCART6    | mitochondrial carrier triple repeat 6                                                        | 0.1177 | 0.0102 |
| 1561604_at   |           | CDNA clone IMAGE:4796102                                                                     | 0.1291 | 0.0324 |
| 1561609_at   |           | Homo sapiens; clone IMAGE:5392784; mRNA                                                      | 0.1394 | 0.0269 |
| 1561690_at   |           | CDNA clone IMAGE:5303966                                                                     | 1.0918 | 0.0092 |
| 1561749_at   |           | Full length insert cDNA clone ZD97H10                                                        | 0.473  | 0.0001 |
| 1561754_at   |           | Full length insert cDNA clone ZA88B06                                                        | 1.5025 | 0.0069 |
| 1561762_s_at |           | Full length insert cDNA clone ZD67D03                                                        | 0.5034 | 0.0001 |
| 1561884_at   | CEPT1     | choline/ethanolamine phosphotransferase 1                                                    | 0.2764 | 0.0197 |
| 1561886_a_at |           | CDNA FLJ39506 fis; clone PROST2017612                                                        | 0.8737 | 0.0139 |



|              |           |                                                                                                       |        |        |
|--------------|-----------|-------------------------------------------------------------------------------------------------------|--------|--------|
| 1561893_at   |           | CDNA clone IMAGE:4096047                                                                              | 0.524  | 0.0264 |
| 1561896_at   |           | CDNA FLJ30156 fis; clone BRACE2000487                                                                 | 0.1642 | 0.0351 |
| 1561906_at   |           | Homo sapiens; clone IMAGE:3626122                                                                     | 0.1769 | 0.0169 |
| 1561924_at   |           | Full length insert cDNA clone YU27B01                                                                 | 0.1873 | 0.022  |
| 1561965_at   | SNRPB2    | Small nuclear ribonucleoprotein polypeptide B"                                                        | 0.2448 | 0.0144 |
| 1561973_at   | SMARCC2   | SWI/SNF related; matrix associated; actin dependent regulator of chromatin; subfamily c; member 2     | 0.4327 | 0.0036 |
| 1562022_s_at | RAD9A     | RAD9 homolog A (S. pombe)                                                                             | 0.443  | 0.0009 |
| 1562095_at   |           | Homo sapiens; clone IMAGE:4663772; mRNA                                                               | 0.181  | 0.0025 |
| 1562208_a_at |           | MRNA; cDNA DKFZp761E11121 (from clone DKFZp761E11121)                                                 | 0.4446 | 0.0016 |
| 1562209_at   | WDR21B    | WD repeat domain 21B                                                                                  | 0.1104 | 0.0174 |
| 1562230_at   |           | Full length insert cDNA clone YI60C11                                                                 | 0.2034 | 0.0253 |
| 1562236_at   | MYST4     | MYST histone acetyltransferase (monocytic leukemia) 4                                                 | 0.2288 | 0.0272 |
| 1562281_at   |           | MRNA; cDNA DKFZp313A0310 (from clone DKFZp313A0310)                                                   | 0.1394 | 0.0471 |
| 1562386_s_at | ZNF501    | zinc finger protein 501                                                                               | 0.4822 | 0.0003 |
| 1562387_at   | FLJ13231  | hypothetical protein FLJ13231                                                                         | 0.2622 | 0.0015 |
| 1562396_at   | PP8961    | hypothetical protein LOC650662                                                                        | 0.1007 | 0.0347 |
| 1562412_at   |           | CDNA clone IMAGE:3847423                                                                              | 0.1522 | 0.0185 |
| 1562440_at   | MAP3K13   | Mitogen-activated protein kinase kinase kinase 13                                                     | 0.3129 | 0.04   |
| 1562442_a_at | SSBP1     | single-stranded DNA binding protein 1                                                                 | 0.3176 | 0.0085 |
| 1562458_at   | UBE2W     | ubiquitin-conjugating enzyme E2W (putative)                                                           | 0.1213 | 0.017  |
| 1562477_at   | EBF2      | early B-cell factor 2                                                                                 | 0.1168 | 0.0127 |
| 1562497_at   |           | CDNA FLJ38224 fis; clone FCBBF2003395                                                                 | 1.2147 | 0.0014 |
| 1562505_at   |           | Homo sapiens; clone IMAGE:5550275; mRNA                                                               | 0.4962 | 0.0435 |
| 1562516_at   | WDR60     | WD repeat domain 60                                                                                   | 0.5297 | 0.0025 |
| 1562677_at   |           | Homo sapiens; Similar to v-myb avian myeloblastosis viral oncogene homolog; clone IMAGE:3535159; mRNA | 0.3183 | 0      |
| 1562718_at   |           | Homo sapiens; clone IMAGE:5171428; mRNA                                                               | 0.1762 | 0.0327 |
| 1562738_a_at |           | Homo sapiens; clone IMAGE:4132913; mRNA                                                               | 0.2787 | 0.0485 |
| 1562775_at   | NUDT12    | nudix (nucleoside diphosphate linked moiety X)-type motif 12                                          | 0.3337 | 0.0025 |
| 1562789_at   | ZNF229    | zinc finger protein 229                                                                               | 0.2933 | 0.01   |
| 1562849_at   |           | CDNA FLJ37115 fis; clone BRACE2022158                                                                 | 0.1452 | 0.0285 |
| 1562876_s_at | LOC541471 | Homo sapiens; clone IMAGE:4337889; mRNA, Hypothetical LOC541471                                       | 0.1996 | 0.0008 |

|              |           |                                                                                                 |        |        |
|--------------|-----------|-------------------------------------------------------------------------------------------------|--------|--------|
| 1562938_at   | LOC729234 | Similar to fumarylacetoacetate hydrolase domain containing 2A                                   | 0.4132 | 0.0016 |
| 1562940_at   |           | CDNA clone IMAGE:5301683                                                                        | 0.2816 | 0.0051 |
| 1562946_at   |           | Homo sapiens; clone IMAGE:3503939; mRNA                                                         | 0.2748 | 0.0418 |
| 1563012_x_at |           | CDNA clone IMAGE:5302718                                                                        | 0.3243 | 0.0059 |
| 1563016_at   |           | Homo sapiens; clone IMAGE:4295692; mRNA                                                         | 0.1278 | 0.0435 |
| 1563051_at   | OSBP      | oxysterol binding protein                                                                       | 0.4163 | 0.0187 |
| 1563075_s_at |           | Clone IMAGE:110987 mRNA sequence                                                                | 0.7337 | 0.0049 |
| 1563076_x_at |           | Clone IMAGE:110987 mRNA sequence                                                                | 0.3127 | 0.0043 |
| 1563104_at   |           | CDNA clone IMAGE:4155841                                                                        | 0.3655 | 0.02   |
| 1563129_at   |           | MRNA full length insert cDNA clone EUROIMAGE 626063                                             | 0.3423 | 0.0018 |
| 1563130_a_at |           | MRNA full length insert cDNA clone EUROIMAGE 626063                                             | 0.8045 | 0.0011 |
| 1563147_at   |           | CDNA clone IMAGE:3632505                                                                        | 0.1319 | 0.0207 |
| 1563173_at   |           | MRNA; cDNA DKFZp667P1917 (from clone DKFZp667P1917)                                             | 0.1457 | 0.0301 |
| 1563209_a_at | MACROD2   | MACRO domain containing 2                                                                       | 1.3365 | 0.0365 |
| 1563210_at   |           | Homo sapiens; clone IMAGE:5785570; mRNA                                                         | 0.1664 | 0.0229 |
| 1563303_at   |           | Full length insert cDNA clone ZD88D08                                                           | 0.1355 | 0.0027 |
| 1563321_s_at | MLLT10    | myeloid/lymphoid or mixed-lineage leukemia (trithorax homolog; Drosophila); translocated to; 10 | 0.747  | 0.0264 |
| 1563364_at   |           | Homo sapiens; clone IMAGE:4272847; mRNA                                                         | 0.8315 | 0.0139 |
| 1563396_x_at |           | Homo sapiens; clone IMAGE:4281761; mRNA                                                         | 0.1393 | 0.0176 |
| 1563452_at   |           | MRNA; cDNA DKFZp686G0344 (from clone DKFZp686G0344)                                             | 0.5191 | 0.0015 |
| 1563468_at   |           | MRNA; cDNA DKFZp451O249 (from clone DKFZp451O249)                                               | 0.4322 | 0.0011 |
| 1563471_at   | KIAA1632  | KIAA1632                                                                                        | 0.2824 | 0.0037 |
| 1563482_at   |           | MRNA; cDNA DKFZp451M0319 (from clone DKFZp451M0319)                                             | 0.1362 | 0.046  |
| 1563483_at   | FAM91A2   | family with sequence similarity 91; member A2                                                   | 0.3609 | 0.0033 |
| 1563620_at   | BTRC      | beta-transducin repeat containing                                                               | 0.1078 | 0.0217 |
| 1563646_a_at | TMEM67    | transmembrane protein 67                                                                        | 0.3812 | 0.0203 |
| 1563687_a_at | FRYL      | FRY-like                                                                                        | 0.3016 | 0.0217 |
| 1563776_at   |           | CDNA clone IMAGE:4837134                                                                        | 0.2299 | 0.0032 |
| 1563781_at   | LOC285949 | hypothetical protein LOC285949                                                                  | 0.9443 | 0.0008 |
| 1563881_at   |           | MRNA; cDNA DKFZp547O108 (from clone DKFZp547O108)                                               | 0.6586 | 0.0182 |
| 1563947_a_at | ERC1      | ELKS/RAB6-interacting/CAST family member 1                                                      | 0.6539 | 0.0188 |
| 1564015_at   | C18orf58  | chromosome 18 open reading frame 58                                                             | 0.1217 | 0.0101 |
| 1564070_s_at |           | CDNA FLJ36668 fis; clone UTERU2003926                                                           | 0.1977 | 0.0092 |
| 1564166_s_at | PRKRIP1   | PRKR interacting protein 1 (IL11 inducible)                                                     | 0.3106 | 0.0208 |

|              |           |                                                        |        |        |
|--------------|-----------|--------------------------------------------------------|--------|--------|
| 1564220_a_at |           | CDNA FLJ39613 fis; clone SKNSH2009357                  | 3.2161 | 0      |
| 1564227_at   |           | CDNA: FLJ21299 fis; clone COL02041                     | 0.3667 | 0.0025 |
| 1564231_at   | IFT80     | intraflagellar transport 80 homolog (Chlamydomonas)    | 0.1492 | 0.0179 |
| 1564240_at   |           | CDNA FLJ38408 fis; clone FEBRA2009029                  | 0.2584 | 0.0064 |
| 1564467_at   | FLJ13305  | hypothetical protein FLJ13305                          | 0.6417 | 0.007  |
| 1564474_at   | LOC728723 | hypothetical protein LOC728723                         | 0.1833 | 0.0015 |
| 1564475_s_at | LOC728723 | hypothetical protein LOC728723                         | 0.252  | 0.0488 |
| 1564547_x_at |           | Homo sapiens; clone IMAGE:3138608; mRNA                | 0.1479 | 0.0381 |
| 1564665_at   |           | CDNA: FLJ22725 fis; clone HSI14917                     | 0.2095 | 0.0177 |
| 1564699_at   |           | CDNA clone IMAGE:4297077                               | 0.5503 | 0.006  |
| 1564773_x_at |           | CDNA clone IMAGE:4715948                               | 0.4689 | 0.024  |
| 1564776_at   | LENG10    | leukocyte receptor cluster (LRC) member 10             | 0.2317 | 0.0384 |
| 1564798_at   |           | CDNA FLJ20804 fis; clone ADSE02063                     | 0.3235 | 0.0031 |
| 1564820_at   |           | MRNA; cDNA DKFZp564E012 (from clone DKFZp564E012)      | 0.1787 | 0.0201 |
| 1564906_at   | SNHG4     | small nucleolar RNA host gene (non-protein coding) 4   | 0.2461 | 0.0072 |
| 1564962_at   | ZNF92     | zinc finger protein 92                                 | 0.2414 | 0.0372 |
| 1564963_x_at | ZNF92     | zinc finger protein 92                                 | 0.2326 | 0.0429 |
| 1564970_at   | SETDB2    | SET domain; bifurcated 2                               | 0.3714 | 0.0002 |
| 1564972_x_at | SETDB2    | SET domain; bifurcated 2                               | 0.2542 | 0.0006 |
| 1565149_at   | DYNC2H1   | dynein; cytoplasmic 2; heavy chain 1                   | 0.9528 | 0.0002 |
| 1565557_at   |           | FLJ00399 protein                                       | 0.1458 | 0.0198 |
| 1565566_a_at |           | Full length insert cDNA YN68A11                        | 0.3927 | 0.0321 |
| 1565620_at   | CTGLF1    | Centaurin; gamma-like family; member 1                 | 0.7138 | 0.0013 |
| 1565692_at   |           | CDNA FLJ40647 fis; clone THYMU2017522                  | 0.5025 | 0.0122 |
| 1565696_at   |           | CDNA FLJ11794 fis; clone HEMBA1006138                  | 0.1033 | 0.0422 |
| 1565705_x_at |           | CDNA: FLJ21395 fis; clone COL03557                     | 0.2247 | 0.0131 |
| 1565717_s_at | FUS       | fusion (involved in t(12;16) in malignant liposarcoma) | 2.8167 | 0      |
| 1565743_at   |           | CDNA FLJ37648 fis; clone BRHIP2000532                  | 0.6514 | 0.0353 |
| 1565786_x_at | FLJ45482  | hypothetical LOC645566                                 | 0.4656 | 0.0023 |
| 1565799_at   | RAB3IP    | RAB3A interacting protein (rabin3)                     | 0.1575 | 0.0475 |
| 1565800_x_at | RAB3IP    | RAB3A interacting protein (rabin3)                     | 0.1767 | 0.0032 |
| 1565810_at   |           | CDNA clone IMAGE:5278245                               | 0.214  | 0.04   |
| 1565811_at   |           | CDNA clone IMAGE:5278245                               | 0.2584 | 0.0193 |
| 1565867_a_at | ZC3H11A   | zinc finger CCCH-type containing 11A                   | 0.3067 | 0.0352 |
| 1565873_at   |           | Full length insert cDNA clone YP75C01                  | 0.1356 | 0.0099 |

|              |           |                                                                    |        |        |
|--------------|-----------|--------------------------------------------------------------------|--------|--------|
| 1565881_at   |           | CDNA FLJ12064 fis; clone HEMBB1002232                              | 0.3616 | 0.0068 |
| 1565886_at   |           | Full length insert cDNA clone ZB94A08                              | 1.1917 | 0.0002 |
| 1565887_at   | TRPM7     | Transient receptor potential cation channel; subfamily M; member 7 | 0.1952 | 0.0039 |
| 1565889_at   |           | Full length insert cDNA YQ03C01                                    | 0.4884 | 0.0072 |
| 1565913_at   |           | Full length insert cDNA clone YR04D03                              | 0.2922 | 0.0242 |
| 1565935_at   | LOC91431  | prematurely terminated mRNA decay factor-like                      | 0.365  | 0.0012 |
| 1565951_s_at | CHML      | choroideremia-like (Rab escort protein 2)                          | 1.0341 | 0.0001 |
| 1565976_at   |           | Full length insert cDNA YU76C01                                    | 0.4859 | 0.0299 |
| 1566084_at   | LOC644215 | Hypothetical LOC644215                                             | 0.4157 | 0.0279 |
| 1566102_at   | TLL5      | tubulin tyrosine ligase-like family; member 5                      | 0.248  | 0.0035 |
| 1566142_at   |           | CDNA FLJ37949 fis; clone CTONG2009156                              | 0.3564 | 0.0069 |
| 1566166_at   |           | MRNA; cDNA DKFZp313H2139 (from clone DKFZp313H2139)                | 0.4744 | 0.0375 |
| 1566191_at   | SUZ12     | Suppressor of zeste 12 homolog (Drosophila)                        | 0.7653 | 0.0063 |
| 1566207_at   | TCEA1     | transcription elongation factor A (SII); 1                         | 0.4641 | 0.0029 |
| 1566243_at   |           | MRNA; cDNA DKFZp547L144 (from clone DKFZp547L144)                  | 0.292  | 0.0121 |
| 1566403_at   | SNORA68   | small nucleolar RNA; H/ACA box 68                                  | 0.1998 | 0.0142 |
| 1566465_at   | LOC728987 | Similar to potassium channel; subfamily K; member 1                | 0.2039 | 0.0462 |
| 1566482_at   |           | MRNA; cDNA DKFZp313L2229 (from clone DKFZp313L2229)                | 1.0491 | 0.0106 |
| 1566515_at   | CWF19L2   | CWF19-like 2; cell cycle control (S. pombe)                        | 0.1323 | 0.0361 |
| 1566518_at   |           |                                                                    | 0.1427 | 0.0077 |
| 1566539_at   |           | MRNA; cDNA DKFZp586G081 (from clone DKFZp586G081)                  | 0.5233 | 0.0172 |
| 1566597_at   |           | MRNA; cDNA DKFZp761O2417 (from clone DKFZp761O2417)                | 0.4397 | 0.0388 |
| 1566606_a_at | TEX9      | testis expressed 9                                                 | 0.1663 | 0.005  |
| 1566673_at   |           | CDNA FLJ36337 fis; clone THYMU2006324                              | 0.2161 | 0.0009 |
| 1566860_at   | LOC145663 | hypothetical protein LOC145663                                     | 0.1396 | 0.0382 |
| 1566862_at   |           | CDNA clone IMAGE:5310996                                           | 0.1022 | 0.011  |
| 1566889_at   | THADA     | Thyroid adenoma associated                                         | 0.1391 | 0.022  |
| 1566980_at   |           | Full length insert cDNA clone YQ07A04                              | 0.171  | 0.0417 |
| 1567032_s_at | ZNF160    | zinc finger protein 160                                            | 1.0097 | 0.0428 |
| 1567044_s_at |           | Full length insert cDNA clone YN86A01                              | 0.4483 | 0.0269 |
| 1567107_s_at | TPM4      | tropomyosin 4                                                      | 1.2623 | 0.0085 |
| 1567575_at   |           | Trapped 3' terminal exon; clone C2C4                               | 0.2081 | 0.0342 |
| 1567862_at   | DNAH14    | dynein; axonemal; heavy chain 14, hypothetical protein LOC127602   | 0.2094 | 0.0312 |

|              |           |                                                                                               |        |        |
|--------------|-----------|-----------------------------------------------------------------------------------------------|--------|--------|
| 1568574_x_at | SPP1      | Secreted phosphoprotein 1 (osteopontin; bone sialoprotein I; early T-lymphocyte activation 1) | 0.2321 | 0.0179 |
| 1568594_s_at | TRIM52    | tripartite motif-containing 52                                                                | 1.8964 | 0      |
| 1568596_a_at | TROAP     | trophinin associated protein (tastin)                                                         | 0.8921 | 0.0027 |
| 1568597_at   | LOC646762 | hypothetical protein LOC646762                                                                | 1.7376 | 0      |
| 1568605_at   | JRK       | jerky homolog (mouse)                                                                         | 0.3773 | 0.0324 |
| 1568611_at   |           | Homo sapiens; clone IMAGE:3892140; mRNA                                                       | 1.2554 | 0.0019 |
| 1568617_a_at | KIAA1543  | KIAA1543                                                                                      | 0.8145 | 0.0095 |
| 1568620_at   | CSAD      | cysteine sulfinic acid decarboxylase                                                          | 0.332  | 0.0469 |
| 1568623_a_at | SLC35E4   | solute carrier family 35; member E4                                                           | 0.4764 | 0.0031 |
| 1568627_at   | SMEK2     | SMEK homolog 2; suppressor of mek1 (Dictyostelium)                                            | 0.5149 | 0.0178 |
| 1568634_a_at | LOC339977 | similar to hypothetical protein MGC38937                                                      | 0.3032 | 0.004  |
| 1568661_at   |           | CDNA clone IMAGE:5303305                                                                      | 0.1599 | 0.0075 |
| 1568717_a_at | FKBP15    | FK506 binding protein 15; 133kDa                                                              | 0.1661 | 0.0318 |
| 1568720_at   | ZNF506    | zinc finger protein 506                                                                       | 0.5604 | 0.0481 |
| 1568763_s_at | LOC728613 | programmed cell death 6, programmed cell death protein 6-like                                 | 1.0817 | 0.0041 |
| 1568781_at   |           | CDNA clone IMAGE:4389310                                                                      | 0.4795 | 0.0384 |
| 1568783_at   | SFRS12    | Splicing factor; arginine/serine-rich 12                                                      | 0.4012 | 0.0043 |
| 1568799_at   |           | CDNA clone IMAGE:4798168                                                                      | 0.2474 | 0.0001 |
| 1568801_at   | C15orf44  | chromosome 15 open reading frame 44                                                           | 0.2018 | 0.0152 |
| 1568813_at   |           | CDNA clone IMAGE:4620359                                                                      | 0.3156 | 0.0123 |
| 1568822_at   | GTPBP5    | GTP binding protein 5 (putative)                                                              | 0.24   | 0.0073 |
| 1568834_s_at | CCDC90B   | coiled-coil domain containing 90B                                                             | 0.8619 | 0.0378 |
| 1568836_at   | CLK4      | CDC-like kinase 4                                                                             | 0.2328 | 0.0479 |
| 1568838_at   |           | CDNA clone IMAGE:5261280                                                                      | 0.7421 | 0.0347 |
| 1568840_at   | WDSOF1    | WD repeats and SOF1 domain containing                                                         | 0.1864 | 0.0323 |
| 1568856_at   | NBR2      | Neighbor of BRCA1 gene 2                                                                      | 0.2182 | 0.0024 |
| 1568857_a_at | NBR2      | Neighbor of BRCA1 gene 2                                                                      | 0.4286 | 0.0097 |
| 1568865_at   | FNTB      | Farnesyltransferase; CAAX box; beta                                                           | 0.999  | 0.0097 |
| 1568866_at   |           | CDNA clone IMAGE:5450715                                                                      | 0.1531 | 0.0467 |
| 1568873_at   | ZNF519    | zinc finger protein 519                                                                       | 0.5244 | 0.0029 |
| 1568877_a_at | ACBD5     | acyl-Coenzyme A binding domain containing 5                                                   | 0.831  | 0.0111 |
| 1568883_at   |           | Homo sapiens; Similar to KIAA1503 protein; clone IMAGE:5505326; mRNA                          | 0.182  | 0.0025 |
| 1568891_x_at | FANCD2    | Fanconi anemia; complementation group D2                                                      | 0.1032 | 0.0486 |
| 1568915_at   |           | CDNA clone IMAGE:4822684                                                                      | 0.255  | 0.0007 |
| 1568983_a_at |           | CDNA clone IMAGE:5261717                                                                      | 1.3736 | 0.0061 |
| 1568987_at   | MGC57346  | hypothetical LOC401884                                                                        | 0.2952 | 0.0054 |

|              |           |                                                                                                                                                                                                                                                                                                                              |        |        |
|--------------|-----------|------------------------------------------------------------------------------------------------------------------------------------------------------------------------------------------------------------------------------------------------------------------------------------------------------------------------------|--------|--------|
| 1569053_at   | AP3M2     | adaptor-related protein complex 3; mu 2 subunit                                                                                                                                                                                                                                                                              | 0.4291 | 0.004  |
| 1569108_a_at | ZNF589    | zinc finger protein 589                                                                                                                                                                                                                                                                                                      | 0.4511 | 0.0002 |
| 1569112_at   | SLC44A5   | solute carrier family 44; member 5                                                                                                                                                                                                                                                                                           | 1.0363 | 0.0356 |
| 1569139_s_at | FAM53A    | family with sequence similarity 53; member A                                                                                                                                                                                                                                                                                 | 0.2148 | 0.0183 |
| 1569142_at   | TRIM13    | tripartite motif-containing 13                                                                                                                                                                                                                                                                                               | 0.4383 | 0.0135 |
| 1569147_at   |           | CDNA clone IMAGE:5298846                                                                                                                                                                                                                                                                                                     | 0.2876 | 0.0029 |
| 1569167_at   |           | Homo sapiens; clone IMAGE:3867502; mRNA                                                                                                                                                                                                                                                                                      | 0.529  | 0.0118 |
| 1569180_at   |           | Homo sapiens; clone IMAGE:4250282; mRNA                                                                                                                                                                                                                                                                                      | 0.7881 | 0.0431 |
| 1569181_x_at |           | Homo sapiens; clone IMAGE:4250282; mRNA                                                                                                                                                                                                                                                                                      | 0.7377 | 0.0244 |
| 1569183_a_at | CHM       | choroideremia (Rab escort protein 1)                                                                                                                                                                                                                                                                                         | 0.6369 | 0.0011 |
| 1569189_at   | TTC9C     | tetratricopeptide repeat domain 9C                                                                                                                                                                                                                                                                                           | 0.4508 | 0.0022 |
| 1569194_at   | ZNF789    | zinc finger protein 789                                                                                                                                                                                                                                                                                                      | 0.2851 | 0.0043 |
| 1569241_a_at | ZNF93     | zinc finger protein 93                                                                                                                                                                                                                                                                                                       | 0.5522 | 0.0067 |
| 1569250_at   | ZNF333    | zinc finger protein 333                                                                                                                                                                                                                                                                                                      | 0.1413 | 0.026  |
| 1569277_at   | ZNF91     | Zinc finger protein 91                                                                                                                                                                                                                                                                                                       | 0.1883 | 0.007  |
| 1569291_at   | CROCCL1   | ciliary rootlet coiled-coil; rootletin-like 1                                                                                                                                                                                                                                                                                | 0.1314 | 0.0091 |
| 1569296_a_at |           | CDNA clone IMAGE:4722553                                                                                                                                                                                                                                                                                                     | 0.3079 | 0.0262 |
| 1569302_at   | KIAA1731  | KIAA1731                                                                                                                                                                                                                                                                                                                     | 0.4727 | 0.0054 |
| 1569311_at   |           | Homo sapiens; clone IMAGE:5557598; mRNA                                                                                                                                                                                                                                                                                      | 0.8735 | 0.0131 |
| 1569312_at   |           | CDNA clone IMAGE:4067166                                                                                                                                                                                                                                                                                                     | 1.1977 | 0.004  |
| 1569318_at   | MGC39821  | hypothetical protein MGC39821                                                                                                                                                                                                                                                                                                | 0.1921 | 0.008  |
| 1569320_at   | GPBP1L1   | GC-rich promoter binding protein 1-like 1                                                                                                                                                                                                                                                                                    | 1.3974 | 0.001  |
| 1569353_at   | CP110     | CP110 protein                                                                                                                                                                                                                                                                                                                | 0.3422 | 0.013  |
| 1569368_at   | LOC648921 | Similar to Actin; cytoplasmic 2 (Gamma-actin)                                                                                                                                                                                                                                                                                | 0.1559 | 0.0166 |
| 1569377_at   | TMEM67    | transmembrane protein 67                                                                                                                                                                                                                                                                                                     | 0.8594 | 0.0015 |
| 1569392_at   | GPSN2     | glycoprotein; synaptic 2                                                                                                                                                                                                                                                                                                     | 0.2774 | 0.0115 |
| 1569500_at   |           | Homo sapiens; clone IMAGE:4183247; mRNA                                                                                                                                                                                                                                                                                      | 0.3477 | 0.0011 |
| 1569503_at   | HEATR5B   | HEAT repeat containing 5B                                                                                                                                                                                                                                                                                                    | 0.1968 | 0.0392 |
| 1569519_at   | KIAA1245  | CLIP-190-like, KIAA1245, hypothetical protein LOC728895, neuroblastoma breakpoint family; member 1, neuroblastoma breakpoint family; member 10, neuroblastoma breakpoint family; member 11, neuroblastoma breakpoint family; member 20, neuroblastoma breakpoint family; member 8, neuroblastoma breakpoint family; member 9 | 0.367  | 0.0407 |
| 1569538_at   |           | Clone FLB8310 PRO2225                                                                                                                                                                                                                                                                                                        | 0.3608 | 0.021  |
| 1569557_at   | ZNF248    | zinc finger protein 248                                                                                                                                                                                                                                                                                                      | 0.1961 | 0.0105 |

|              |           |                                                                                                                                                                                                                                                                                                                  |        |        |
|--------------|-----------|------------------------------------------------------------------------------------------------------------------------------------------------------------------------------------------------------------------------------------------------------------------------------------------------------------------|--------|--------|
| 1569569_x_at |           | Homo sapiens; Similar to neuronal thread protein; clone IMAGE:3932744; mRNA                                                                                                                                                                                                                                      | 0.1139 | 0.006  |
| 1569600_at   | DLEU2     | Deleted in lymphocytic leukemia; 2                                                                                                                                                                                                                                                                               | 0.3157 | 0.0395 |
| 1569607_s_at | ANKRD20A1 | ankyrin repeat domain 20 family; member A1, ankyrin repeat domain 20 family; member A2, ankyrin repeat domain 20 family; member A3, ankyrin repeat domain 20 family; member A4, chromosome 21 open reading frame 81, similar to ankyrin repeat domain 20 family; member A2, similar to ankyrin repeat domain 20A | 2.0949 | 0.0071 |
| 1569608_x_at | LOC643187 | Similar to ankyrin repeat domain 20A                                                                                                                                                                                                                                                                             | 0.9645 | 0.0313 |
| 1569611_a_at | IQCH      | IQ motif containing H                                                                                                                                                                                                                                                                                            | 0.1379 | 0.0134 |
| 1569652_at   | MLLT3     | myeloid/lymphoid or mixed-lineage leukemia (trithorax homolog; Drosophila); translocated to; 3                                                                                                                                                                                                                   | 1.2121 | 0.0208 |
| 1569665_at   |           | Homo sapiens; clone IMAGE:5581630; mRNA                                                                                                                                                                                                                                                                          | 0.2457 | 0.004  |
| 1569666_s_at |           | Homo sapiens; clone IMAGE:5581630; mRNA                                                                                                                                                                                                                                                                          | 0.7012 | 0.0017 |
| 1569677_a_at | C8orf45   | chromosome 8 open reading frame 45                                                                                                                                                                                                                                                                               | 0.1665 | 0.0032 |
| 1569685_at   |           | Homo sapiens; clone IMAGE:4428229; mRNA                                                                                                                                                                                                                                                                          | 0.1423 | 0.0241 |
| 1569693_at   | BTBD8     | BTB (POZ) domain containing 8                                                                                                                                                                                                                                                                                    | 0.1145 | 0.0129 |
| 1569701_at   | PER3      | Period homolog 3 (Drosophila)                                                                                                                                                                                                                                                                                    | 0.4642 | 0.003  |
| 1569703_a_at |           | Homo sapiens; clone IMAGE:4043297; mRNA                                                                                                                                                                                                                                                                          | 0.1996 | 0.0023 |
| 1569813_at   | STRN      | striatin; calmodulin binding protein                                                                                                                                                                                                                                                                             | 0.2032 | 0.0065 |
| 1569815_x_at | STRN      | striatin; calmodulin binding protein                                                                                                                                                                                                                                                                             | 0.3034 | 0.0054 |
| 1569852_at   | C7orf53   | chromosome 7 open reading frame 53                                                                                                                                                                                                                                                                               | 0.1662 | 0.0231 |
| 1569867_at   | EME2      | essential meiotic endonuclease 1 homolog 2 (S. pombe)                                                                                                                                                                                                                                                            | 0.4334 | 0.0378 |
| 1569868_s_at | EME2      | essential meiotic endonuclease 1 homolog 2 (S. pombe)                                                                                                                                                                                                                                                            | 0.6978 | 0.0148 |
| 1569930_at   |           | CDNA clone IMAGE:4850172                                                                                                                                                                                                                                                                                         | 0.5238 | 0.0217 |
| 1569940_at   | SLC6A16   | Solute carrier family 6; member 16                                                                                                                                                                                                                                                                               | 0.8087 | 0.0348 |
| 1569948_at   |           | CDNA clone IMAGE:5275301                                                                                                                                                                                                                                                                                         | 0.1468 | 0.004  |
| 1569952_x_at |           | CDNA clone IMAGE:4814292                                                                                                                                                                                                                                                                                         | 0.5352 | 0.0327 |
| 1569958_at   |           | Homo sapiens; clone IMAGE:4064953; mRNA                                                                                                                                                                                                                                                                          | 0.1279 | 0.0408 |
| 1569973_at   |           | Homo sapiens; clone IMAGE:4849828; mRNA                                                                                                                                                                                                                                                                          | 0.5246 | 0.001  |
| 1569974_x_at |           | Homo sapiens; clone IMAGE:4849828; mRNA                                                                                                                                                                                                                                                                          | 0.3879 | 0.0064 |
| 1569999_at   |           | CDNA clone IMAGE:4837159                                                                                                                                                                                                                                                                                         | 0.3646 | 0.003  |
| 1570001_at   | CASP8AP2  | CASP8 associated protein 2                                                                                                                                                                                                                                                                                       | 0.1664 | 0.0243 |
| 1570039_at   | MGC39900  | hypothetical protein MGC39900                                                                                                                                                                                                                                                                                    | 0.2534 | 0.0097 |
| 1570042_a_at | ADAM9     | ADAM metallopeptidase domain 9 (meltrin gamma)                                                                                                                                                                                                                                                                   | 0.1847 | 0.0399 |

|              |           |                                                                                                                                                                                                                                                 |        |        |
|--------------|-----------|-------------------------------------------------------------------------------------------------------------------------------------------------------------------------------------------------------------------------------------------------|--------|--------|
| 1570048_at   | DPH4      | DPH4; JJJ3 homolog (S. cerevisiae)                                                                                                                                                                                                              | 0.2002 | 0.031  |
| 1570084_at   |           | CDNA clone IMAGE:4824356                                                                                                                                                                                                                        | 0.1324 | 0.005  |
| 1570120_at   |           | CDNA clone IMAGE:4824334                                                                                                                                                                                                                        | 2.5427 | 0.0005 |
| 1570125_at   |           | Homo sapiens; clone IMAGE:5229457; mRNA                                                                                                                                                                                                         | 0.2138 | 0.014  |
| 1570130_at   | SPATS2    | spermatogenesis associated; serine-rich 2                                                                                                                                                                                                       | 0.4173 | 0.0003 |
| 1570135_at   | ZNF230    | zinc finger protein 230                                                                                                                                                                                                                         | 0.4308 | 0.0019 |
| 1570143_at   |           | Homo sapiens; clone IMAGE:3932570; mRNA                                                                                                                                                                                                         | 1.219  | 0.0001 |
| 1570165_at   |           | CDNA clone IMAGE:3895112                                                                                                                                                                                                                        | 0.2787 | 0.0453 |
| 1570166_a_at |           | CDNA clone IMAGE:4719554                                                                                                                                                                                                                        | 0.217  | 0.0348 |
| 1570173_at   | INTS7     | integrator complex subunit 7                                                                                                                                                                                                                    | 0.2563 | 0.0318 |
| 1570200_at   | HELB      | helicase (DNA) B                                                                                                                                                                                                                                | 0.2821 | 0.0004 |
| 1570227_at   |           | CDNA clone IMAGE:4857625; with apparent retained intron                                                                                                                                                                                         | 0.339  | 0.0004 |
| 1570253_a_at | RHEBL1    | Ras homolog enriched in brain like 1                                                                                                                                                                                                            | 0.3488 | 0.0045 |
| 1570255_s_at | ANKRD20A1 | ankyrin repeat domain 20 family; member A1, ankyrin repeat domain 20 family; member A2, ankyrin repeat domain 20 family; member A3, ankyrin repeat domain 20 family; member A4, ankyrin repeat domain 20B, similar to ankyrin repeat domain 20A | 0.6627 | 0.0388 |
| 1570329_at   |           | Homo sapiens; clone IMAGE:4853422; mRNA                                                                                                                                                                                                         | 0.2271 | 0.0366 |
| 1570351_at   | ADAMTS6   | ADAM metalloproteinase with thrombospondin type 1 motif, 6                                                                                                                                                                                      | 0.2803 | 0.0156 |
| 1570384_at   | TAS2R48   | taste receptor; type 2; member 48                                                                                                                                                                                                               | 0.242  | 0.0014 |
| 1570397_x_at | FAM66C    | family with sequence similarity 66; member C                                                                                                                                                                                                    | 0.124  | 0.0282 |
| 1570441_at   | NAPB      | N-ethylmaleimide-sensitive factor attachment protein; beta                                                                                                                                                                                      | 1.0601 | 0.0012 |
| 1570496_at   |           | CDNA clone IMAGE:4616837                                                                                                                                                                                                                        | 0.3585 | 0.0003 |
| 1570507_at   | SFRS2IP   | Splicing factor; arginine/serine-rich 2; interacting protein                                                                                                                                                                                    | 1.0193 | 0.0002 |
| 1570523_s_at | ATG10     | ATG10 autophagy related 10 homolog (S. cerevisiae)                                                                                                                                                                                              | 0.7274 | 0.0386 |
| 1570571_at   | CCDC91    | Coiled-coil domain containing 91                                                                                                                                                                                                                | 1.67   | 0      |
| 1570572_at   | LOC729291 | hypothetical protein LOC729291                                                                                                                                                                                                                  | 0.1618 | 0.0235 |
| 1570578_at   |           | CDNA clone IMAGE:5274593                                                                                                                                                                                                                        | 0.197  | 0.0168 |
| 1570579_at   |           | CDNA clone IMAGE:5274593                                                                                                                                                                                                                        | 0.1449 | 0.0218 |
| 1570623_at   |           |                                                                                                                                                                                                                                                 | 0.1683 | 0.0078 |
| 1570629_at   |           | Homo sapiens; clone IMAGE:4401081; mRNA                                                                                                                                                                                                         | 0.2074 | 0.0189 |
| 200011_s_at  | ARF3      | ADP-ribosylation factor 3                                                                                                                                                                                                                       | 0.4312 | 0.0064 |



|             |           |                                                                                                                                                                                                                                      |        |        |
|-------------|-----------|--------------------------------------------------------------------------------------------------------------------------------------------------------------------------------------------------------------------------------------|--------|--------|
| 200016_x_at | HNRNPA1   | heterogeneous nuclear ribonucleoprotein A1, similar to Heterogeneous nuclear ribonucleoprotein A1 (Helix-destabilizing protein) (Single-strand binding protein) (hnRNP core protein A1) (HDP-1) (Topoisomerase-inhibitor suppressed) | 0.1652 | 0.0041 |
| 200037_s_at | CBX3      | chromobox homolog 3 (HP1 gamma homolog; Drosophila), similar to chromobox homolog 3                                                                                                                                                  | 0.3535 | 0.0022 |
| 200044_at   | SFRS9     | splicing factor; arginine/serine-rich 9                                                                                                                                                                                              | 0.4687 | 0.0002 |
| 200050_at   | ZNF146    | zinc finger protein 146                                                                                                                                                                                                              | 0.4552 | 0.0089 |
| 200060_s_at | RNPS1     | RNA binding protein S1; serine-rich domain                                                                                                                                                                                           | 0.338  | 0.0017 |
| 200063_s_at | LOC399804 | nucleophosmin (nucleolar phosphoprotein B23; numatrin), similar to nucleophosmin 1 isoform 1                                                                                                                                         | 0.1999 | 0.0102 |
| 200064_at   | HSP90AB1  | heat shock protein 90kDa alpha (cytosolic); class B member 1                                                                                                                                                                         | 0.2778 | 0.0286 |
| 200068_s_at | CANX      | calnexin                                                                                                                                                                                                                             | 0.2512 | 0.0377 |
| 200069_at   | SART3     | squamous cell carcinoma antigen recognized by T cells 3                                                                                                                                                                              | 1.3022 | 0      |
| 200079_s_at | KARS      | lysyl-tRNA synthetase                                                                                                                                                                                                                | 0.296  | 0.0398 |
| 200098_s_at | ANAPC5    | anaphase promoting complex subunit 5                                                                                                                                                                                                 | 0.2919 | 0.0137 |
| 200616_s_at | KIAA0152  | KIAA0152                                                                                                                                                                                                                             | 0.6512 | 0.0259 |
| 200623_s_at | CALM3     | calmodulin 3 (phosphorylase kinase; delta)                                                                                                                                                                                           | 1.3468 | 0      |
| 200627_at   | PTGES3    | prostaglandin E synthase 3 (cytosolic)                                                                                                                                                                                               | 0.3958 | 0.0005 |
| 200635_s_at | PTPRF     | protein tyrosine phosphatase; receptor type; F                                                                                                                                                                                       | 0.9653 | 0.0143 |
| 200637_s_at | PTPRF     | protein tyrosine phosphatase; receptor type; F                                                                                                                                                                                       | 1.1867 | 0.007  |
| 200646_s_at | NUCB1     | nucleobindin 1                                                                                                                                                                                                                       | 0.9728 | 0.0038 |
| 200649_at   | NUCB1     | nucleobindin 1                                                                                                                                                                                                                       | 0.7658 | 0.0005 |
| 200663_at   | CD63      | CD63 molecule                                                                                                                                                                                                                        | 0.2959 | 0.0009 |
| 200664_s_at | DNAJB1    | DnaJ (Hsp40) homolog; subfamily B; member 1                                                                                                                                                                                          | 0.7206 | 0.0153 |
| 200665_s_at | SPARC     | secreted protein; acidic; cysteine-rich (osteonectin)                                                                                                                                                                                | 0.6071 | 0.0015 |
| 200666_s_at | DNAJB1    | DnaJ (Hsp40) homolog; subfamily B; member 1                                                                                                                                                                                          | 0.6109 | 0.004  |
| 200687_s_at | SF3B3     | splicing factor 3b; subunit 3; 130kDa                                                                                                                                                                                                | 0.8797 | 0.0001 |
| 200688_at   | SF3B3     | splicing factor 3b; subunit 3; 130kDa                                                                                                                                                                                                | 0.719  | 0.0044 |
| 200697_at   | HK1       | hexokinase 1                                                                                                                                                                                                                         | 1.1865 | 0.0001 |
| 200700_s_at | KDEL2     | KDEL (Lys-Asp-Glu-Leu) endoplasmic reticulum protein retention receptor 2                                                                                                                                                            | 0.6222 | 0.0168 |
| 200701_at   | NPC2      | Niemann-Pick disease; type C2                                                                                                                                                                                                        | 0.3065 | 0.0283 |
| 200703_at   | DYNLL1    | dynein; light chain; LC8-type 1, similar to dynein; cytoplasmic; light peptide                                                                                                                                                       | 0.496  | 0      |

|             |          |                                                                                   |        |        |
|-------------|----------|-----------------------------------------------------------------------------------|--------|--------|
| 200707_at   | PRKCSH   | protein kinase C substrate 80K-H                                                  | 1.012  | 0      |
| 200708_at   | GOT2     | glutamic-oxaloacetic transaminase 2; mitochondrial (aspartate aminotransferase 2) | 0.5607 | 0.0089 |
| 200712_s_at | MAPRE1   | microtubule-associated protein; RP/EB family; member 1                            | 0.827  | 0.0052 |
| 200713_s_at | MAPRE1   | microtubule-associated protein; RP/EB family; member 1                            | 0.6198 | 0      |
| 200726_at   | PPP1CC   | protein phosphatase 1; catalytic subunit; gamma isoform                           | 0.334  | 0.0017 |
| 200727_s_at | ACTR2    | ARP2 actin-related protein 2 homolog (yeast)                                      | 1.0523 | 0.0111 |
| 200737_at   | PGK1     | phosphoglycerate kinase 1                                                         | 0.9135 | 0.0014 |
| 200738_s_at | PGK1     | phosphoglycerate kinase 1                                                         | 0.4124 | 0.0003 |
| 200739_s_at | SUMO3    | SMT3 suppressor of mif two 3 homolog 3 (S. cerevisiae)                            | 0.8138 | 0.0362 |
| 200740_s_at | SUMO3    | SMT3 suppressor of mif two 3 homolog 3 (S. cerevisiae)                            | 0.3539 | 0.0166 |
| 200749_at   | RAN      | RAN; member RAS oncogene family                                                   | 0.8218 | 0.0007 |
| 200750_s_at | RAN      | RAN; member RAS oncogene family                                                   | 0.7123 | 0.0023 |
| 200755_s_at | CALU     | calumenin                                                                         | 1.4715 | 0      |
| 200756_x_at | CALU     | calumenin                                                                         | 2.2672 | 0.0001 |
| 200757_s_at | CALU     | calumenin                                                                         | 1.1033 | 0      |
| 200770_s_at | LAMC1    | laminin; gamma 1 (formerly LAMB2)                                                 | 0.6504 | 0.0126 |
| 200778_s_at | 2-Sep    | septin 2                                                                          | 0.5428 | 0.0299 |
| 200783_s_at | STMN1    | stathmin 1/oncoprotein 18                                                         | 1.7885 | 0.0002 |
| 200794_x_at | DAZAP2   | DAZ associated protein 2                                                          | 0.1982 | 0.0231 |
| 200801_x_at | ACTB     | actin; beta                                                                       | 0.1081 | 0.0119 |
| 200803_s_at | TEGT     | testis enhanced gene transcript (BAX inhibitor 1)                                 | 0.5449 | 0.0038 |
| 200805_at   | LMAN2    | lectin; mannose-binding 2                                                         | 0.421  | 0.0285 |
| 200820_at   | PSMD8    | proteasome (prosome; macropain) 26S subunit; non-ATPase; 8                        | 0.6651 | 0.0006 |
| 200822_x_at | TPI1     | triosephosphate isomerase 1                                                       | 0.4131 | 0.0005 |
| 200827_at   | PLOD1    | procollagen-lysine 1; 2-oxoglutarate 5-dioxygenase 1                              | 0.4775 | 0.0348 |
| 200833_s_at | RAP1B    | RAP1B; member of RAS oncogene family                                              | 0.2851 | 0.0414 |
| 200837_at   | BCAP31   | B-cell receptor-associated protein 31                                             | 0.3114 | 0.0376 |
| 200841_s_at | EPRS     | glutamyl-prolyl-tRNA synthetase                                                   | 1.2062 | 0.0058 |
| 200842_s_at | EPRS     | glutamyl-prolyl-tRNA synthetase                                                   | 0.9812 | 0.0002 |
| 200851_s_at | KIAA0174 | KIAA0174                                                                          | 0.4226 | 0.0016 |
| 200853_at   | H2AFZ    | H2A histone family; member Z                                                      | 1.2408 | 0      |
| 200867_at   | ZNF313   | zinc finger protein 313                                                           | 0.5972 | 0.001  |
| 200868_s_at | ZNF313   | zinc finger protein 313                                                           | 0.8147 | 0.0045 |
| 200895_s_at | FKBP4    | FK506 binding protein 4; 59kDa                                                    | 0.5933 | 0.0191 |
| 200898_s_at | MGEA5    | meningioma expressed antigen 5 (hyaluronidase)                                    | 1.9176 | 0      |
| 200899_s_at | MGEA5    | meningioma expressed antigen 5 (hyaluronidase)                                    | 0.9717 | 0      |

|             |         |                                                                                                                                                                                               |        |        |
|-------------|---------|-----------------------------------------------------------------------------------------------------------------------------------------------------------------------------------------------|--------|--------|
| 200900_s_at | M6PR    | mannose-6-phosphate receptor (cation dependent)                                                                                                                                               | 1.0835 | 0.0019 |
| 200903_s_at | AHCY    | S-adenosylhomocysteine hydrolase                                                                                                                                                              | 0.602  | 0.0062 |
| 200922_at   | KDELR1  | KDEL (Lys-Asp-Glu-Leu) endoplasmic reticulum protein retention receptor 1                                                                                                                     | 1.1775 | 0      |
| 200925_at   | COX6A1  | cytochrome c oxidase subunit VIa polypeptide 1                                                                                                                                                | 0.2368 | 0.0146 |
| 200931_s_at | VCL     | vinculin                                                                                                                                                                                      | 0.5964 | 0.0033 |
| 200932_s_at | DCTN2   | dynactin 2 (p50)                                                                                                                                                                              | 0.4925 | 0.0046 |
| 200942_s_at | HSBP1   | heat shock factor binding protein 1                                                                                                                                                           | 0.3807 | 0.0358 |
| 200943_at   | HMGN1   | high-mobility group nucleosome binding domain 1                                                                                                                                               | 0.4717 | 0.0047 |
| 200944_s_at | HMGN1   | high-mobility group nucleosome binding domain 1                                                                                                                                               | 0.4832 | 0.0002 |
| 200948_at   | MLF2    | myeloid leukemia factor 2                                                                                                                                                                     | 0.2817 | 0.0376 |
| 200959_at   | FUS     | fusion (involved in t(12;16) in malignant liposarcoma)                                                                                                                                        | 0.9772 | 0      |
| 200961_at   | SEPHS2  | selenophosphate synthetase 2                                                                                                                                                                  | 0.5957 | 0.0129 |
| 200966_x_at | ALDOA   | aldolase A; fructose-bisphosphate                                                                                                                                                             | 0.4213 | 0.0002 |
| 200988_s_at | PSME3   | proteasome (prosome; macropain) activator subunit 3 (PA28 gamma; Ki)                                                                                                                          | 0.3357 | 0.0357 |
| 200990_at   | TRIM28  | tripartite motif-containing 28                                                                                                                                                                | 0.6655 | 0.0005 |
| 200998_s_at | CKAP4   | cytoskeleton-associated protein 4                                                                                                                                                             | 1.2655 | 0.0003 |
| 200999_s_at | CKAP4   | cytoskeleton-associated protein 4                                                                                                                                                             | 0.895  | 0.0016 |
| 201000_at   | AARS    | alanyl-tRNA synthetase                                                                                                                                                                        | 0.5898 | 0.006  |
| 201001_s_at | Kua-UEV | ubiquitin-conjugating enzyme E2 variant 1                                                                                                                                                     | 0.6248 | 0.0078 |
| 201023_at   | TAF7    | TAF7 RNA polymerase II; TATA box binding protein (TBP)-associated factor; 55kDa                                                                                                               | 0.3477 | 0.0227 |
| 201037_at   | PFKP    | phosphofructokinase; platelet                                                                                                                                                                 | 2.4263 | 0.0017 |
| 201039_s_at | RAD23A  | RAD23 homolog A (S. cerevisiae)                                                                                                                                                               | 0.6018 | 0.0071 |
| 201043_s_at | ANP32A  | acidic (leucine-rich) nuclear phosphoprotein 32 family; member A                                                                                                                              | 1.1563 | 0.0022 |
| 201046_s_at | RAD23A  | RAD23 homolog A (S. cerevisiae)                                                                                                                                                               | 0.4039 | 0.0019 |
| 201050_at   | PLD3    | phospholipase D family; member 3                                                                                                                                                              | 0.8764 | 0.0001 |
| 201051_at   | ANP32A  | acidic (leucine-rich) nuclear phosphoprotein 32 family; member A                                                                                                                              | 0.9236 | 0.0002 |
| 201052_s_at | PSMF1   | proteasome (prosome; macropain) inhibitor subunit 1 (PI31)                                                                                                                                    | 0.5959 | 0.0088 |
| 201060_x_at | STOM    | stomatin                                                                                                                                                                                      | 0.4963 | 0.015  |
| 201065_s_at | GTF2I   | general transcription factor II; i, general transcription factor II; i; pseudogene, general transcription factor II; i; pseudogene 1, similar to general transcription factor II; i isoform 1 | 0.2786 | 0.0415 |
| 201068_s_at | PSMC2   | proteasome (prosome; macropain) 26S subunit; ATPase; 2                                                                                                                                        | 0.2543 | 0.0227 |

|             |         |                                                                                                   |        |        |
|-------------|---------|---------------------------------------------------------------------------------------------------|--------|--------|
| 201072_s_at | SMARCC1 | SWI/SNF related; matrix associated; actin dependent regulator of chromatin; subfamily c; member 1 | 0.7266 | 0.0063 |
| 201073_s_at | SMARCC1 | SWI/SNF related; matrix associated; actin dependent regulator of chromatin; subfamily c; member 1 | 0.8293 | 0.0006 |
| 201074_at   | SMARCC1 | SWI/SNF related; matrix associated; actin dependent regulator of chromatin; subfamily c; member 1 | 0.6648 | 0.0004 |
| 201075_s_at | SMARCC1 | SWI/SNF related; matrix associated; actin dependent regulator of chromatin; subfamily c; member 1 | 1.0004 | 0.001  |
| 201085_s_at | SON     | SON DNA binding protein                                                                           | 0.7399 | 0.0297 |
| 201090_x_at | TUBA1B  | tubulin; alpha 1b                                                                                 | 0.522  | 0      |
| 201101_s_at | BCLAF1  | BCL2-associated transcription factor 1                                                            | 0.8223 | 0.0264 |
| 201102_s_at | PFKL    | phosphofructokinase; liver                                                                        | 0.5804 | 0.003  |
| 201111_at   | CSE1L   | CSE1 chromosome segregation 1-like (yeast)                                                        | 0.366  | 0.0415 |
| 201112_s_at | CSE1L   | CSE1 chromosome segregation 1-like (yeast)                                                        | 0.4649 | 0.0123 |
| 201115_at   | POLD2   | polymerase (DNA directed); delta 2; regulatory subunit 50kDa                                      | 0.4229 | 0.0181 |
| 201177_s_at | SAE2    | SUMO1 activating enzyme subunit 2                                                                 | 0.3532 | 0.0363 |
| 201181_at   | GNAI3   | guanine nucleotide binding protein (G protein); alpha inhibiting activity polypeptide 3           | 0.6712 | 0.0065 |
| 201183_s_at | CHD4    | chromodomain helicase DNA binding protein 4                                                       | 0.752  | 0.0006 |
| 201184_s_at | CHD4    | chromodomain helicase DNA binding protein 4                                                       | 0.3288 | 0.0132 |
| 201194_at   | SEPW1   | selenoprotein W; 1                                                                                | 0.6211 | 0.0282 |
| 201202_at   | PCNA    | proliferating cell nuclear antigen                                                                | 0.6319 | 0.0027 |
| 201203_s_at | RRBP1   | ribosome binding protein 1 homolog 180kDa (dog)                                                   | 0.7947 | 0.0239 |
| 201231_s_at | ENO1    | enolase 1; (alpha)                                                                                | 0.7885 | 0.0009 |
| 201249_at   | SLC2A1  | solute carrier family 2 (facilitated glucose transporter); member 1                               | 0.2769 | 0.0133 |
| 201250_s_at | SLC2A1  | solute carrier family 2 (facilitated glucose transporter); member 1                               | 2.1504 | 0.0001 |
| 201251_at   | PKM2    | pyruvate kinase; muscle                                                                           | 0.421  | 0.008  |
| 201264_at   | COPE    | coatamer protein complex; subunit epsilon                                                         | 0.4374 | 0.0062 |
| 201270_x_at | NUDCD3  | NudC domain containing 3                                                                          | 0.9776 | 0.0012 |
| 201271_s_at | RALY    | RNA binding protein; autoantigenic (hnRNP-associated with lethal yellow homolog (mouse))          | 0.6604 | 0.0041 |
| 201276_at   | RAB5B   | RAB5B; member RAS oncogene family                                                                 | 0.3996 | 0.0022 |
| 201281_at   | ADRM1   | adhesion regulating molecule 1                                                                    | 0.4079 | 0.0245 |
| 201286_at   | SDC1    | syndecan 1                                                                                        | 1.039  | 0.0458 |
| 201287_s_at | SDC1    | syndecan 1                                                                                        | 1.6023 | 0.0152 |

|             |         |                                                                       |        |        |
|-------------|---------|-----------------------------------------------------------------------|--------|--------|
| 201291_s_at | TOP2A   | topoisomerase (DNA) II alpha 170kDa                                   | 3.5569 | 0      |
| 201292_at   | TOP2A   | topoisomerase (DNA) II alpha 170kDa                                   | 4.5628 | 0      |
| 201293_x_at | PPIA    | peptidylprolyl isomerase A (cyclophilin A)                            | 0.1917 | 0.0002 |
| 201299_s_at | MOBK1B  | MOB1; Mps One Binder kinase activator-like 1B (yeast)                 | 0.6662 | 0.028  |
| 201305_x_at | ANP32B  | acidic (leucine-rich) nuclear phosphoprotein 32 family; member B      | 0.3974 | 0.0163 |
| 201306_s_at | ANP32B  | acidic (leucine-rich) nuclear phosphoprotein 32 family; member B      | 0.4902 | 0.002  |
| 201307_at   | 11-Sep  | septin 11                                                             | 0.6372 | 0.0303 |
| 201308_s_at | 11-Sep  | septin 11                                                             | 0.6212 | 0.0066 |
| 201309_x_at | C5orf13 | chromosome 5 open reading frame 13                                    | 1.2319 | 0.0237 |
| 201313_at   | ENO2    | enolase 2 (gamma; neuronal)                                           | 1.8114 | 0.0184 |
| 201326_at   | CCT6A   | chaperonin containing TCP1; subunit 6A (zeta 1)                       | 0.7081 | 0.0001 |
| 201340_s_at | ENC1    | ectodermal-neural cortex (with BTB-like domain)                       | 2.4643 | 0.0016 |
| 201341_at   | ENC1    | ectodermal-neural cortex (with BTB-like domain)                       | 3.986  | 0      |
| 201342_at   | SNRPC   | small nuclear ribonucleoprotein polypeptide C                         | 0.3998 | 0.0436 |
| 201353_s_at | BAZ2A   | bromodomain adjacent to zinc finger domain; 2A                        | 0.8919 | 0      |
| 201354_s_at | BAZ2A   | bromodomain adjacent to zinc finger domain; 2A                        | 0.3896 | 0.0154 |
| 201379_s_at | TPD52L2 | tumor protein D52-like 2                                              | 0.5094 | 0.0286 |
| 201381_x_at | CACYBP  | calcyclin binding protein                                             | 0.3414 | 0.0312 |
| 201386_s_at | DHX15   | DEAH (Asp-Glu-Ala-His) box polypeptide 15                             | 0.4626 | 0.0154 |
| 201392_s_at | IGF2R   | insulin-like growth factor 2 receptor                                 | 0.8569 | 0.0022 |
| 201396_s_at | SGTA    | small glutamine-rich tetratricopeptide repeat (TPR)-containing; alpha | 0.4046 | 0.0005 |
| 201397_at   | PHGDH   | phosphoglycerate dehydrogenase                                        | 1.1205 | 0.0383 |
| 201426_s_at | VIM     | vimentin                                                              | 0.3945 | 0.0276 |
| 201430_s_at | DPYSL3  | dihydropyrimidinase-like 3                                            | 0.5813 | 0.0239 |
| 201431_s_at | DPYSL3  | dihydropyrimidinase-like 3                                            | 1.5727 | 0.0034 |
| 201439_at   | GBF1    | golgi-specific brefeldin A resistance factor 1                        | 0.7409 | 0.0066 |
| 201440_at   | DDX23   | DEAD (Asp-Glu-Ala-Asp) box polypeptide 23                             | 0.5815 | 0.0016 |
| 201446_s_at | TIA1    | TIA1 cytotoxic granule-associated RNA binding protein                 | 0.8548 | 0.0398 |
| 201456_s_at | BUB3    | BUB3 budding uninhibited by benzimidazoles 3 homolog (yeast)          | 1.878  | 0      |
| 201458_s_at | BUB3    | BUB3 budding uninhibited by benzimidazoles 3 homolog (yeast)          | 1.0436 | 0      |
| 201475_x_at | MARS    | methionyl-tRNA synthetase                                             | 0.9791 | 0      |
| 201476_s_at | RRM1    | ribonucleotide reductase M1 polypeptide                               | 1.1283 | 0.0241 |
| 201478_s_at | DKC1    | dyskeratosis congenita 1; dyskerin                                    | 0.6145 | 0.0284 |

|             |          |                                                                          |        |        |
|-------------|----------|--------------------------------------------------------------------------|--------|--------|
| 201480_s_at | SUPT5H   | suppressor of Ty 5 homolog (S. cerevisiae)                               | 0.6248 | 0.0012 |
| 201485_s_at | RCN2     | reticulocalbin 2; EF-hand calcium binding domain                         | 0.7821 | 0.0179 |
| 201488_x_at | KHDRBS1  | KH domain containing; RNA binding; signal transduction associated 1      | 0.4761 | 0.0006 |
| 201514_s_at | G3BP1    | GTPase activating protein (SH3 domain) binding protein 1                 | 0.7483 | 0.0283 |
| 201526_at   | ARF5     | ADP-ribosylation factor 5                                                | 0.6037 | 0.0002 |
| 201527_at   | ATP6V1F  | ATPase; H+ transporting; lysosomal 14kDa; V1 subunit F                   | 0.5362 | 0.0007 |
| 201544_x_at | PABPN1   | poly(A) binding protein; nuclear 1                                       | 0.2924 | 0.0243 |
| 201549_x_at | JARID1B  | jumonji; AT rich interactive domain 1B                                   | 0.776  | 0.043  |
| 201555_at   | MCM3     | minichromosome maintenance complex component 3                           | 1.5579 | 0.0001 |
| 201558_at   | RAE1     | RAE1 RNA export 1 homolog (S. pombe)                                     | 0.8097 | 0.001  |
| 201564_s_at | FSCN1    | fascin homolog 1; actin-bundling protein (Strongylocentrotus purpuratus) | 1.8871 | 0.0013 |
| 201576_s_at | GLB1     | galactosidase; beta 1                                                    | 0.4923 | 0.0216 |
| 201579_at   | FAT      | FAT tumor suppressor homolog 1 (Drosophila)                              | 2.5862 | 0.0005 |
| 201584_s_at | DDX39    | DEAD (Asp-Glu-Ala-Asp) box polypeptide 39                                | 1.2912 | 0      |
| 201589_at   | SMC1A    | structural maintenance of chromosomes 1A                                 | 0.8647 | 0      |
| 201602_s_at | PPP1R12A | protein phosphatase 1; regulatory (inhibitor) subunit 12A                | 1.0361 | 0.0034 |
| 201603_at   | PPP1R12A | protein phosphatase 1; regulatory (inhibitor) subunit 12A                | 0.3955 | 0.0126 |
| 201604_s_at | PPP1R12A | protein phosphatase 1; regulatory (inhibitor) subunit 12A                | 1.0079 | 0.0016 |
| 201606_s_at | PWP1     | PWP1 homolog (S. cerevisiae)                                             | 0.6225 | 0      |
| 201607_at   | PWP1     | PWP1 homolog (S. cerevisiae)                                             | 0.5745 | 0.0138 |
| 201608_s_at | PWP1     | PWP1 homolog (S. cerevisiae)                                             | 0.6787 | 0.0001 |
| 201613_s_at | AP1G2    | adaptor-related protein complex 1; gamma 2 subunit                       | 0.7098 | 0.0211 |
| 201622_at   | SND1     | staphylococcal nuclease and tudor domain containing 1                    | 0.2396 | 0.0308 |
| 201639_s_at | CPSF1    | cleavage and polyadenylation specific factor 1; 160kDa                   | 0.7449 | 0.0051 |
| 201643_x_at | JMJD1B   | jumonji domain containing 1B                                             | 0.5619 | 0.0046 |
| 201646_at   | SCARB2   | scavenger receptor class B; member 2                                     | 1.0742 | 0.0024 |
| 201647_s_at | SCARB2   | scavenger receptor class B; member 2                                     | 1.3642 | 0.001  |
| 201656_at   | ITGA6    | integrin; alpha 6                                                        | 0.5915 | 0.0294 |
| 201657_at   | ARL1     | ADP-ribosylation factor-like 1                                           | 0.8427 | 0.0062 |
| 201658_at   | ARL1     | ADP-ribosylation factor-like 1                                           | 0.4066 | 0.0461 |
| 201663_s_at | SMC4     | structural maintenance of chromosomes 4                                  | 3.3714 | 0      |
| 201664_at   | SMC4     | structural maintenance of chromosomes 4                                  | 2.4966 | 0      |
| 201668_x_at | MARCKS   | myristoylated alanine-rich protein kinase C substrate                    | 0.8021 | 0.0132 |

|             |          |                                                                                                      |        |        |
|-------------|----------|------------------------------------------------------------------------------------------------------|--------|--------|
| 201673_s_at | GYS1     | glycogen synthase 1 (muscle)                                                                         | 0.859  | 0.0309 |
| 201683_x_at | TOX4     | TOX high mobility group box family member 4                                                          | 0.5394 | 0.0371 |
| 201688_s_at | TPD52    | tumor protein D52                                                                                    | 1.3088 | 0.0233 |
| 201689_s_at | TPD52    | tumor protein D52                                                                                    | 1.5718 | 0.0156 |
| 201690_s_at | TPD52    | tumor protein D52                                                                                    | 1.519  | 0.0355 |
| 201692_at   | OPRS1    | opioid receptor; sigma 1                                                                             | 0.5049 | 0.0119 |
| 201697_s_at | DNMT1    | DNA (cytosine-5-)-methyltransferase 1                                                                | 1.1904 | 0      |
| 201698_s_at | SFRS9    | splicing factor; arginine/serine-rich 9                                                              | 0.4476 | 0.0013 |
| 201705_at   | PSMD7    | proteasome (prosome; macropain) 26S subunit; non-ATPase; 7                                           | 0.275  | 0.0356 |
| 201710_at   | MYBL2    | v-myb myeloblastosis viral oncogene homolog (avian)-like 2                                           | 0.4771 | 0.0376 |
| 201727_s_at | ELAVL1   | ELAV (embryonic lethal; abnormal vision; Drosophila)-like 1 (Hu antigen R)                           | 0.7019 | 0.0135 |
| 201736_s_at | 6-Mar    | membrane-associated ring finger (C3HC4) 6                                                            | 0.8285 | 0.0003 |
| 201737_s_at | 6-Mar    | membrane-associated ring finger (C3HC4) 6                                                            | 0.6085 | 0.001  |
| 201745_at   | TWF1     | twinfilin; actin-binding protein; homolog 1 (Drosophila)                                             | 0.4071 | 0.0046 |
| 201747_s_at | SAFB     | scaffold attachment factor B                                                                         | 0.5123 | 0.004  |
| 201748_s_at | SAFB     | scaffold attachment factor B                                                                         | 0.525  | 0      |
| 201754_at   | COX6C    | cytochrome c oxidase subunit VIc                                                                     | 0.2115 | 0.0201 |
| 201755_at   | MCM5     | minichromosome maintenance complex component 5                                                       | 1.0942 | 0.0084 |
| 201761_at   | MTHFD2   | methylenetetrahydrofolate dehydrogenase (NADP+ dependent) 2; methenyltetrahydrofolate cyclohydrolase | 1.8331 | 0      |
| 201764_at   | TMEM106C | transmembrane protein 106C                                                                           | 1.5481 | 0      |
| 201768_s_at | CLINT1   | clathrin interactor 1                                                                                | 0.854  | 0.0061 |
| 201773_at   | ADNP     | activity-dependent neuroprotector homeobox                                                           | 0.4494 | 0.003  |
| 201774_s_at | NCAPD2   | non-SMC condensin I complex; subunit D2                                                              | 1.7827 | 0.0005 |
| 201794_s_at | SMG7     | Smg-7 homolog; nonsense mediated mRNA decay factor (C. elegans)                                      | 0.6476 | 0.011  |
| 201803_at   | POLR2B   | polymerase (RNA) II (DNA directed) polypeptide B; 140kDa                                             | 0.3128 | 0.0244 |
| 201804_x_at | TBCB     | tubulin folding cofactor B                                                                           | 0.4284 | 0.0023 |
| 201817_at   | UBE3C    | ubiquitin protein ligase E3C                                                                         | 0.7277 | 0.0153 |
| 201823_s_at | RNF14    | ring finger protein 14                                                                               | 0.9284 | 0.0237 |
| 201834_at   | PRKAB1   | protein kinase; AMP-activated; beta 1 non-catalytic subunit                                          | 0.789  | 0.0119 |
| 201835_s_at | PRKAB1   | protein kinase; AMP-activated; beta 1 non-catalytic subunit                                          | 1.2286 | 0.0142 |
| 201841_s_at | HSPB1    | heat shock 27kDa protein 1                                                                           | 1.1239 | 0.0001 |
| 201844_s_at | RYBP     | RING1 and YY1 binding protein                                                                        | 1.0906 | 0      |
| 201846_s_at | RYBP     | RING1 and YY1 binding protein                                                                        | 1.0737 | 0.0007 |

|             |          |                                                                     |        |        |
|-------------|----------|---------------------------------------------------------------------|--------|--------|
| 201848_s_at | BNIP3    | BCL2/adenovirus E1B 19kDa interacting protein 3                     | 1.5029 | 0.0038 |
| 201849_at   | BNIP3    | BCL2/adenovirus E1B 19kDa interacting protein 3                     | 0.9047 | 0.0013 |
| 201851_at   | SH3GL1   | SH3-domain GRB2-like 1                                              | 0.5049 | 0.0204 |
| 201853_s_at | CDC25B   | cell division cycle 25 homolog B (S. pombe)                         | 2.6884 | 0      |
| 201854_s_at | ASCIZ    | ATM/ATR-Substrate Chk2-Interacting Zn <sup>2+</sup> -finger protein | 0.5538 | 0.0412 |
| 201863_at   | FAM32A   | family with sequence similarity 32; member A                        | 0.6627 | 0.0056 |
| 201864_at   | GDI1     | GDP dissociation inhibitor 1                                        | 0.5732 | 0.0011 |
| 201868_s_at | TBL1X    | transducin (beta)-like 1X-linked                                    | 0.5007 | 0.0248 |
| 201870_at   | TOMM34   | translocase of outer mitochondrial membrane 34                      | 0.8777 | 0.0021 |
| 201890_at   | RRM2     | ribonucleotide reductase M2 polypeptide                             | 4.6936 | 0      |
| 201896_s_at | PSRC1    | proline/serine-rich coiled-coil 1                                   | 1.6969 | 0.0017 |
| 201897_s_at | CKS1B    | CDC28 protein kinase regulatory subunit 1B                          | 0.9681 | 0.0297 |
| 201898_s_at | UBE2A    | ubiquitin-conjugating enzyme E2A (RAD6 homolog)                     | 0.4047 | 0.0327 |
| 201899_s_at | UBE2A    | ubiquitin-conjugating enzyme E2A (RAD6 homolog)                     | 0.3692 | 0.0286 |
| 201917_s_at | SLC25A36 | solute carrier family 25; member 36                                 | 0.8867 | 0.0018 |
| 201918_at   | SLC25A36 | Solute carrier family 25; member 36                                 | 0.943  | 0.0002 |
| 201920_at   | SLC20A1  | solute carrier family 20 (phosphate transporter); member 1          | 1.04   | 0.0016 |
| 201929_s_at | PKP4     | plakophilin 4                                                       | 0.7563 | 0.0373 |
| 201930_at   | MCM6     | minichromosome maintenance complex component 6                      | 1.6906 | 0      |
| 201933_at   | CHMP1A   | chromatin modifying protein 1A                                      | 0.7139 | 0.0002 |
| 201939_at   | PLK2     | polo-like kinase 2 (Drosophila)                                     | 1.2733 | 0.0066 |
| 201940_at   | CPD      | carboxypeptidase D                                                  | 0.9822 | 0.0005 |
| 201942_s_at | CPD      | carboxypeptidase D                                                  | 1.0914 | 0.0024 |
| 201943_s_at | CPD      | carboxypeptidase D                                                  | 0.9323 | 0.003  |
| 201944_at   | HEXB     | hexosaminidase B (beta polypeptide)                                 | 0.4575 | 0.0007 |
| 201970_s_at | NASP     | nuclear autoantigenic sperm protein (histone-binding)               | 0.6521 | 0.0466 |
| 201979_s_at | PPP5C    | protein phosphatase 5; catalytic subunit                            | 1.1959 | 0.0005 |
| 201991_s_at | KIF5B    | kinesin family member 5B                                            | 0.4037 | 0.0053 |
| 201992_s_at | KIF5B    | kinesin family member 5B                                            | 0.5666 | 0.0413 |
| 202015_x_at |          |                                                                     | 0.3633 | 0.0032 |
| 202019_s_at | LANCL1   | LanC lantibiotic synthetase component C-like 1 (bacterial)          | 0.5104 | 0.0176 |
| 202022_at   | ALDOC    | aldolase C; fructose-bisphosphate                                   | 2.1555 | 0.0025 |
| 202031_s_at | WIPI2    | WD repeat domain; phosphoinositide interacting 2                    | 0.3016 | 0.0276 |
| 202045_s_at | GRLF1    | glucocorticoid receptor DNA binding factor 1                        | 0.4646 | 0.0036 |
| 202046_s_at | GRLF1    | glucocorticoid receptor DNA binding factor 1                        | 0.3351 | 0.0245 |



|             |          |                                                                       |        |        |
|-------------|----------|-----------------------------------------------------------------------|--------|--------|
| 202062_s_at | SEL1L    | sel-1 suppressor of lin-12-like (C. elegans)                          | 0.5368 | 0.0096 |
| 202064_s_at | SEL1L    | sel-1 suppressor of lin-12-like (C. elegans)                          | 0.4623 | 0.0247 |
| 202088_at   | SLC39A6  | solute carrier family 39 (zinc transporter); member 6                 | 0.5094 | 0.0001 |
| 202089_s_at | SLC39A6  | solute carrier family 39 (zinc transporter); member 6                 | 1.0241 | 0.0006 |
| 202092_s_at | ARL2BP   | ADP-ribosylation factor-like 2 binding protein                        | 1.0784 | 0.0022 |
| 202094_at   | BIRC5    | baculoviral IAP repeat-containing 5 (survivin)                        | 1.062  | 0.0055 |
| 202095_s_at | BIRC5    | baculoviral IAP repeat-containing 5 (survivin)                        | 3.1563 | 0      |
| 202098_s_at | PRMT2    | protein arginine methyltransferase 2                                  | 1.3919 | 0.0001 |
| 202102_s_at | BRD4     | bromodomain containing 4                                              | 0.952  | 0.0006 |
| 202107_s_at | MCM2     | minichromosome maintenance complex component 2                        | 2.7147 | 0      |
| 202112_at   | VWF      | von Willebrand factor                                                 | 3.3763 | 0      |
| 202120_x_at | AP2S1    | adaptor-related protein complex 2; sigma 1 subunit                    | 0.3312 | 0.0082 |
| 202122_s_at | M6PRBP1  | mannose-6-phosphate receptor binding protein 1                        | 1.0851 | 0.0027 |
| 202128_at   | KIAA0317 | KIAA0317                                                              | 0.8999 | 0.0181 |
| 202129_s_at | RIOK3    | RIO kinase 3 (yeast)                                                  | 1.058  | 0.0354 |
| 202141_s_at | COPS8    | COP9 constitutive photomorphogenic homolog subunit 8 (Arabidopsis)    | 0.2266 | 0.0365 |
| 202148_s_at | PYCR1    | pyrroline-5-carboxylate reductase 1                                   | 0.8183 | 0.0044 |
| 202153_s_at | NUP62    | nucleoporin 62kDa                                                     | 0.5691 | 0.0055 |
| 202159_at   | FARSA    | phenylalanyl-tRNA synthetase; alpha subunit                           | 0.5992 | 0.0046 |
| 202161_at   | PKN1     | protein kinase N1                                                     | 0.6898 | 0.003  |
| 202162_s_at | CNOT8    | CCR4-NOT transcription complex; subunit 8                             | 0.6646 | 0.0307 |
| 202163_s_at | CNOT8    | CCR4-NOT transcription complex; subunit 8                             | 0.4105 | 0.0171 |
| 202164_s_at | CNOT8    | CCR4-NOT transcription complex; subunit 8                             | 0.5879 | 0.0377 |
| 202167_s_at | MMS19    | MMS19 nucleotide excision repair homolog (S. cerevisiae)              | 0.6195 | 0.0269 |
| 202175_at   | CHPF     | chondroitin polymerizing factor                                       | 0.9083 | 0.0097 |
| 202183_s_at | KIF22    | kinesin family member 22, kinesin-like DNA-binding protein pseudogene | 1.3365 | 0      |
| 202185_at   | PLOD3    | procollagen-lysine; 2-oxoglutarate 5-dioxygenase 3                    | 1.2094 | 0      |
| 202187_s_at | PPP2R5A  | protein phosphatase 2; regulatory subunit B'; alpha isoform           | 0.5166 | 0.0131 |
| 202188_at   | NUP93    | nucleoporin 93kDa                                                     | 0.9994 | 0.0001 |
| 202189_x_at | PTBP1    | polypyrimidine tract binding protein 1                                | 0.4289 | 0.0005 |
| 202190_at   | CSTF1    | cleavage stimulation factor; 3' pre-RNA; subunit 1; 50kDa             | 0.5992 | 0.0296 |
| 202199_s_at | SRPK1    | SFRS protein kinase 1                                                 | 0.4936 | 0.0152 |
| 202200_s_at | SRPK1    | SFRS protein kinase 1                                                 | 1.0199 | 0.0011 |

|             |          |                                                                                                                                                                                    |        |        |
|-------------|----------|------------------------------------------------------------------------------------------------------------------------------------------------------------------------------------|--------|--------|
| 202213_s_at | CUL4B    | cullin 4B                                                                                                                                                                          | 0.8235 | 0.0135 |
| 202227_s_at | BRD8     | bromodomain containing 8                                                                                                                                                           | 0.9024 | 0.0002 |
| 202230_s_at | CHERP    | calcium homeostasis endoplasmic reticulum protein                                                                                                                                  | 0.3821 | 0.0136 |
| 202234_s_at | SLC16A1  | solute carrier family 16; member 1 (monocarboxylic acid transporter 1)                                                                                                             | 1.071  | 0.0126 |
| 202236_s_at | SLC16A1  | solute carrier family 16; member 1 (monocarboxylic acid transporter 1)                                                                                                             | 1.219  | 0.0004 |
| 202240_at   | PLK1     | polo-like kinase 1 (Drosophila)                                                                                                                                                    | 0.794  | 0.0137 |
| 202246_s_at | CDK4     | cyclin-dependent kinase 4                                                                                                                                                          | 0.7712 | 0.002  |
| 202253_s_at | DNM2     | dynamain 2                                                                                                                                                                         | 0.7576 | 0      |
| 202260_s_at | STXBP1   | syntaxin binding protein 1                                                                                                                                                         | 0.8143 | 0.0108 |
| 202268_s_at | APPBP1   | amyloid beta precursor protein binding protein 1                                                                                                                                   | 0.4696 | 0.0001 |
| 202289_s_at | TACC2    | transforming; acidic coiled-coil containing protein 2                                                                                                                              | 0.6539 | 0.0433 |
| 202301_s_at | RSRC2    | arginine/serine-rich coiled-coil 2                                                                                                                                                 | 1.0462 | 0.0051 |
| 202302_s_at | RSRC2    | arginine/serine-rich coiled-coil 2                                                                                                                                                 | 0.4689 | 0.0018 |
| 202310_s_at | COL1A1   | collagen; type I; alpha 1                                                                                                                                                          | 2.1334 | 0.0081 |
| 202311_s_at | COL1A1   | collagen; type I; alpha 1                                                                                                                                                          | 1.9429 | 0.0022 |
| 202320_at   | GTF3C1   | general transcription factor IIIC; polypeptide 1; alpha 220kDa                                                                                                                     | 0.5505 | 0.0021 |
| 202323_s_at | ACBD3    | acyl-Coenzyme A binding domain containing 3                                                                                                                                        | 1.3928 | 0.0011 |
| 202329_at   | CSK      | c-src tyrosine kinase                                                                                                                                                              | 0.4658 | 0.019  |
| 202338_at   | TK1      | thymidine kinase 1; soluble                                                                                                                                                        | 1.0574 | 0.0044 |
| 202339_at   | SYMPK    | symplekin                                                                                                                                                                          | 0.3815 | 0.0015 |
| 202345_s_at | FABP5    | fatty acid binding protein 5 (psoriasis-associated), similar to Fatty acid-binding protein; epidermal (E-FABP) (Psoriasis-associated fatty acid-binding protein homolog) (PA-FABP) | 2.6295 | 0      |
| 202346_at   | HIP2     | huntingtin interacting protein 2                                                                                                                                                   | 0.746  | 0.0008 |
| 202347_s_at | HIP2     | huntingtin interacting protein 2                                                                                                                                                   | 0.4094 | 0.0082 |
| 202356_s_at | GTF2F1   | general transcription factor IIF; polypeptide 1; 74kDa                                                                                                                             | 0.6343 | 0.0282 |
| 202360_at   | MAML1    | mastermind-like 1 (Drosophila)                                                                                                                                                     | 0.3296 | 0.0219 |
| 202369_s_at | TRAM2    | translocation associated membrane protein 2                                                                                                                                        | 0.8487 | 0.0437 |
| 202376_at   | SERPINA3 | serpin peptidase inhibitor; clade A (alpha-1 antitrypsin); member 3                                                                                                                | 2.0854 | 0.0315 |
| 202379_s_at | NKTR     | natural killer-tumor recognition sequence                                                                                                                                          | 0.8449 | 0.0019 |
| 202380_s_at | NKTR     | natural killer-tumor recognition sequence                                                                                                                                          | 0.5752 | 0.0104 |
| 202383_at   | JARID1C  | jumonji; AT rich interactive domain 1C                                                                                                                                             | 0.3952 | 0.0443 |
| 202384_s_at | TCOF1    | Treacher Collins-Franceschetti syndrome 1                                                                                                                                          | 0.7001 | 0      |
| 202385_s_at | TCOF1    | Treacher Collins-Franceschetti syndrome 1                                                                                                                                          | 0.6796 | 0.0003 |
| 202396_at   | TCERG1   | transcription elongation regulator 1                                                                                                                                               | 0.4929 | 0.0005 |

|             |          |                                                                                     |        |        |
|-------------|----------|-------------------------------------------------------------------------------------|--------|--------|
| 202397_at   | NUTF2    | nuclear transport factor 2                                                          | 0.8143 | 0.0001 |
| 202405_at   | TIAL1    | TIA1 cytotoxic granule-associated RNA binding protein-like 1                        | 1.0304 | 0.0001 |
| 202406_s_at | TIAL1    | TIA1 cytotoxic granule-associated RNA binding protein-like 1                        | 0.6373 | 0.0058 |
| 202407_s_at | PRPF31   | PRP31 pre-mRNA processing factor 31 homolog (S. cerevisiae)                         | 1.1257 | 0.0027 |
| 202408_s_at | PRPF31   | PRP31 pre-mRNA processing factor 31 homolog (S. cerevisiae)                         | 0.6036 | 0.0002 |
| 202409_at   | IGF2     | insulin- insulin-like growth factor 2, insulin-like growth factor 2 (somatomedin A) | 2.0537 | 0.0132 |
| 202410_x_at | IGF2     | insulin- insulin-like growth factor 2, insulin-like growth factor 2 (somatomedin A) | 5.8377 | 0      |
| 202412_s_at | USP1     | ubiquitin specific peptidase 1                                                      | 1.0469 | 0.0079 |
| 202415_s_at | HSPBP1   | hsp70-interacting protein                                                           | 0.3669 | 0.0229 |
| 202417_at   | KEAP1    | kelch-like ECH-associated protein 1                                                 | 1.1081 | 0      |
| 202421_at   | IGSF3    | immunoglobulin superfamily; member 3                                                | 0.7564 | 0.0285 |
| 202439_s_at | IDS      | iduronate 2-sulfatase (Hunter syndrome)                                             | 0.9787 | 0.027  |
| 202441_at   | ERLIN1   | ER lipid raft associated 1                                                          | 0.5363 | 0.0184 |
| 202442_at   | AP3S1    | adaptor-related protein complex 3; sigma 1 subunit                                  | 0.4229 | 0.0026 |
| 202444_s_at | ERLIN1   | ER lipid raft associated 1                                                          | 1.111  | 0.0106 |
| 202458_at   | PRSS23   | protease; serine; 23                                                                | 1.3998 | 0.0001 |
| 202462_s_at | DDX46    | DEAD (Asp-Glu-Ala-Asp) box polypeptide 46                                           | 0.5549 | 0.0048 |
| 202466_at   | POLS     | polymerase (DNA directed) sigma                                                     | 0.7886 | 0.001  |
| 202470_s_at | CPSF6    | cleavage and polyadenylation specific factor 6; 68kDa                               | 1.0181 | 0.0003 |
| 202496_at   | EDC4     | enhancer of mRNA decapping 4                                                        | 0.8747 | 0.0033 |
| 202503_s_at | KIAA0101 | KIAA0101                                                                            | 5.7452 | 0      |
| 202507_s_at | SNAP25   | synaptosomal-associated protein; 25kDa                                              | 1.7028 | 0.0041 |
| 202508_s_at | SNAP25   | synaptosomal-associated protein; 25kDa                                              | 2.5423 | 0.0022 |
| 202516_s_at | DLG1     | discs; large homolog 1 (Drosophila)                                                 | 1.0927 | 0.0108 |
| 202519_at   | MLXIP    | MLX interacting protein                                                             | 0.793  | 0.0128 |
| 202521_at   | CTCF     | CCCTC-binding factor (zinc finger protein)                                          | 0.6775 | 0      |
| 202532_s_at | DHFR     | dihydrofolate reductase                                                             | 2.3731 | 0      |
| 202533_s_at | DHFR     | dihydrofolate reductase, similar to Dihydrofolate reductase                         | 1.4768 | 0.0001 |
| 202534_x_at | DHFR     | dihydrofolate reductase                                                             | 2.4759 | 0      |
| 202556_s_at | MCRS1    | microspherule protein 1                                                             | 0.5038 | 0.0204 |
| 202558_s_at | STCH     | stress 70 protein chaperone; microsome-associated; 60kDa                            | 0.9456 | 0.0031 |
| 202560_s_at | C1orf77  | chromosome 1 open reading frame 77                                                  | 0.3564 | 0.0232 |
| 202570_s_at | DLGAP4   | discs; large (Drosophila) homolog-associated protein 4                              | 0.9162 | 0.0027 |
| 202573_at   | CSNK1G2  | casein kinase 1; gamma 2                                                            | 0.4386 | 0.0001 |

|             |               |                                                                                                    |        |        |
|-------------|---------------|----------------------------------------------------------------------------------------------------|--------|--------|
| 202574_s_at | CSNK1G2       | casein kinase 1; gamma 2                                                                           | 0.7235 | 0.0012 |
| 202576_s_at | DDX19A        | DEAD (Asp-Glu-Ala-As) box polypeptide 19A,<br>DEAD (Asp-Glu-Ala-As) box polypeptide 19B            | 0.5631 | 0.0008 |
| 202577_s_at | DDX19A        | DEAD (Asp-Glu-Ala-As) box polypeptide 19A                                                          | 0.5282 | 0.0001 |
| 202578_s_at | DDX19A        | DEAD (Asp-Glu-Ala-As) box polypeptide 19A                                                          | 0.8573 | 0.0055 |
| 202580_x_at | FOXM1         | forkhead box M1                                                                                    | 2.2412 | 0.0003 |
| 202589_at   | TYMS          | thymidylate synthetase                                                                             | 4.6693 | 0      |
| 202600_s_at | NRIP1         | nuclear receptor interacting protein 1                                                             | 0.5087 | 0.0379 |
| 202603_at   |               | Clone MO-30 mRNA sequence                                                                          | 0.5321 | 0.0015 |
| 202604_x_at | ADAM10        | ADAM metallopeptidase domain 10                                                                    | 1.0259 | 0.0069 |
| 202605_at   | GUSB          | glucuronidase; beta                                                                                | 0.8788 | 0.0003 |
| 202606_s_at | TLK1          | tousled-like kinase 1                                                                              | 0.3531 | 0.0384 |
| 202610_s_at | MED14         | mediator complex subunit 14                                                                        | 0.3426 | 0.0433 |
| 202621_at   | IRF3          | interferon regulatory factor 3                                                                     | 0.4074 | 0.0109 |
| 202622_s_at | ATXN2         | ataxin 2                                                                                           | 0.3652 | 0.0254 |
| 202633_at   | TOPBP1        | topoisomerase (DNA) II binding protein 1                                                           | 0.9967 | 0      |
| 202642_s_at | TRRAP         | transformation/transcription domain-associated<br>protein                                          | 0.7847 | 0      |
| 202676_x_at | FASTK         | Fas-activated serine/threonine kinase                                                              | 0.7356 | 0.0001 |
| 202677_at   | RASA1         | RAS p21 protein activator (GTPase activating<br>protein) 1                                         | 0.5986 | 0.0059 |
| 202683_s_at | RNMT          | RNA (guanine-7-) methyltransferase                                                                 | 0.4318 | 0.0094 |
| 202694_at   | STK17A        | serine/threonine kinase 17a                                                                        | 0.687  | 0.0235 |
| 202695_s_at | STK17A        | serine/threonine kinase 17a                                                                        | 1.2804 | 0.0211 |
| 202705_at   | CCNB2         | cyclin B2                                                                                          | 4.476  | 0      |
| 202719_s_at | TES           | testis derived transcript (3 LIM domains)                                                          | 1.1025 | 0.0082 |
| 202726_at   | LIG1          | ligase I; DNA; ATP-dependent                                                                       | 1.9378 | 0.0001 |
| 202730_s_at | PDCD4         | programmed cell death 4 (neoplastic transformation<br>inhibitor)                                   | 1.2925 | 0.0002 |
| 202731_at   | PDCD4         | programmed cell death 4 (neoplastic transformation<br>inhibitor)                                   | 2.3113 | 0      |
| 202733_at   | P4HA2         | procollagen-proline; 2-oxoglutarate 4-dioxygenase<br>(proline 4-hydroxylase); alpha polypeptide II | 3.3201 | 0      |
| 202744_at   | SLC20A2       | solute carrier family 20 (phosphate transporter);<br>member 2                                      | 0.3041 | 0.0217 |
| 202754_at   | R3HDM1        | R3H domain containing 1                                                                            | 0.5682 | 0.0201 |
| 202755_s_at | GPC1          | glypican 1                                                                                         | 0.434  | 0.0405 |
| 202757_at   | RP13-122B23.3 | cofactor of BRCA1                                                                                  | 0.5444 | 0.0088 |
| 202758_s_at | RFXANK        | regulatory factor X-associated ankyrin-containing<br>protein                                       | 0.8429 | 0.0001 |
| 202761_s_at | SYNE2         | spectrin repeat containing; nuclear envelope 2                                                     | 0.7601 | 0.0033 |
| 202763_at   | CASP3         | caspase 3; apoptosis-related cysteine peptidase                                                    | 0.8699 | 0.0107 |
| 202765_s_at | FBN1          | fibrillin 1                                                                                        | 0.9024 | 0.0312 |

|             |           |                                                                                                                                                                                         |        |        |
|-------------|-----------|-----------------------------------------------------------------------------------------------------------------------------------------------------------------------------------------|--------|--------|
| 202769_at   | CCNG2     | cyclin G2                                                                                                                                                                               | 0.8102 | 0.0028 |
| 202770_s_at | CCNG2     | cyclin G2                                                                                                                                                                               | 1.3177 | 0.0013 |
| 202773_s_at | SFRS8     | splicing factor; arginine/serine-rich 8 (suppressor-of-white-apricot homolog; Drosophila)                                                                                               | 0.7612 | 0.0019 |
| 202774_s_at | SFRS8     | splicing factor; arginine/serine-rich 8 (suppressor-of-white-apricot homolog; Drosophila)                                                                                               | 0.9586 | 0.0003 |
| 202775_s_at | SFRS8     | splicing factor; arginine/serine-rich 8 (suppressor-of-white-apricot homolog; Drosophila)                                                                                               | 0.7989 | 0.0008 |
| 202779_s_at | LOC731049 | similar to Ubiquitin-conjugating enzyme E2S (Ubiquitin-conjugating enzyme E2-24 kDa) (Ubiquitin-protein ligase) (Ubiquitin carrier protein) (E2-EPF5), ubiquitin-conjugating enzyme E2S | 2.1205 | 0      |
| 202783_at   | NNT       | nicotinamide nucleotide transhydrogenase                                                                                                                                                | 0.9541 | 0.0022 |
| 202784_s_at | NNT       | nicotinamide nucleotide transhydrogenase                                                                                                                                                | 1.6729 | 0.0008 |
| 202789_at   | PLCG1     | phospholipase C; gamma 1                                                                                                                                                                | 0.8182 | 0.0003 |
| 202804_at   | ABCC1     | ATP-binding cassette; sub-family C (CFTR/MRP); member 1                                                                                                                                 | 0.6789 | 0.0049 |
| 202805_s_at | ABCC1     | ATP-binding cassette; sub-family C (CFTR/MRP); member 1                                                                                                                                 | 1.0203 | 0.0006 |
| 202823_at   | TCEB1     | transcription elongation factor B (SIII); polypeptide 1 (15kDa; elongin C)                                                                                                              | 0.3668 | 0.0239 |
| 202837_at   | TRAFD1    | TRAF-type zinc finger domain containing 1                                                                                                                                               | 0.5609 | 0      |
| 202844_s_at | RALBP1    | ralA binding protein 1                                                                                                                                                                  | 0.6721 | 0.0333 |
| 202852_s_at | FLJ11506  | hypothetical protein FLJ11506                                                                                                                                                           | 0.8521 | 0      |
| 202854_at   | HPRT1     | hypoxanthine phosphoribosyltransferase 1 (Lesch-Nyhan syndrome)                                                                                                                         | 0.7173 | 0.0022 |
| 202868_s_at | POP4      | processing of precursor 4; ribonuclease P/MRP subunit ( <i>S. cerevisiae</i> )                                                                                                          | 0.4018 | 0.0207 |
| 202870_s_at | CDC20     | cell division cycle 20 homolog ( <i>S. cerevisiae</i> )                                                                                                                                 | 2.6433 | 0.0006 |
| 202873_at   | ATP6V1C1  | ATPase; H+ transporting; lysosomal 42kDa; V1 subunit C1                                                                                                                                 | 0.6848 | 0.0316 |
| 202892_at   | CDC23     | cell division cycle 23 homolog ( <i>S. cerevisiae</i> )                                                                                                                                 | 1.5882 | 0      |
| 2028_s_at   | E2F1      | E2F transcription factor 1                                                                                                                                                              | 0.4803 | 0.0038 |
| 202903_at   | LSM5      | LSM5 homolog; U6 small nuclear RNA associated ( <i>S. cerevisiae</i> )                                                                                                                  | 0.7872 | 0.0046 |
| 202905_x_at | NBN       | nibrin                                                                                                                                                                                  | 1.1108 | 0.0003 |
| 202906_s_at | NBN       | nibrin                                                                                                                                                                                  | 0.6157 | 0.002  |
| 202925_s_at | PLAGL2    | pleiomorphic adenoma gene-like 2                                                                                                                                                        | 0.6313 | 0.0054 |
| 202934_at   | HK2       | hexokinase 2                                                                                                                                                                            | 1.9179 | 0.0027 |
| 202940_at   | WNK1      | WNK lysine deficient protein kinase 1                                                                                                                                                   | 0.5141 | 0.0007 |
| 202951_at   | STK38     | serine/threonine kinase 38                                                                                                                                                              | 0.7192 | 0.0203 |
| 202952_s_at | ADAM12    | ADAM metallopeptidase domain 12 (meltrin alpha)                                                                                                                                         | 0.5798 | 0.0263 |

|             |           |                                                                                     |        |        |
|-------------|-----------|-------------------------------------------------------------------------------------|--------|--------|
| 202954_at   | UBE2C     | ubiquitin-conjugating enzyme E2C                                                    | 4.3808 | 0      |
| 202955_s_at | ARFGEF1   | ADP-ribosylation factor guanine nucleotide-exchange factor 1(brefeldin A-inhibited) | 1.1725 | 0.0002 |
| 202956_at   | ARFGEF1   | ADP-ribosylation factor guanine nucleotide-exchange factor 1(brefeldin A-inhibited) | 0.5059 | 0.0012 |
| 202968_s_at | DYRK2     | dual-specificity tyrosine-(Y)-phosphorylation regulated kinase 2                    | 2.236  | 0      |
| 202969_at   |           | MRNA; cDNA DKFZp667B0924 (from clone DKFZp667B0924)                                 | 2.1275 | 0      |
| 202970_at   | DYRK2     | dual-specificity tyrosine-(Y)-phosphorylation regulated kinase 2                    | 0.9912 | 0.006  |
| 202971_s_at | DYRK2     | dual-specificity tyrosine-(Y)-phosphorylation regulated kinase 2                    | 2.783  | 0      |
| 202998_s_at | LOXL2     | lysyl oxidase-like 2                                                                | 2.0748 | 0      |
| 203016_s_at | SSX2IP    | synovial sarcoma; X breakpoint 2 interacting protein                                | 1.0048 | 0.02   |
| 203018_s_at | SSX2IP    | synovial sarcoma; X breakpoint 2 interacting protein                                | 0.5004 | 0.0283 |
| 203019_x_at | SSX2IP    | synovial sarcoma; X breakpoint 2 interacting protein                                | 0.3191 | 0.0475 |
| 203022_at   | RNASEH2A  | ribonuclease H2; subunit A                                                          | 2.7082 | 0      |
| 203046_s_at | TIMELESS  | timeless homolog (Drosophila)                                                       | 1.9373 | 0      |
| 203047_at   | STK10     | serine/threonine kinase 10                                                          | 0.5001 | 0.0421 |
| 203050_at   | TP53BP1   | tumor protein p53 binding protein 1                                                 | 0.8491 | 0.0023 |
| 203062_s_at | MDC1      | mediator of DNA damage checkpoint 1                                                 | 0.646  | 0.0237 |
| 203065_s_at | CAV1      | caveolin 1; caveolae protein; 22kDa                                                 | 1.1843 | 0.0116 |
| 203072_at   | LOC390588 | myosin IE, similar to CDK105 protein                                                | 0.3969 | 0.0482 |
| 203078_at   | CUL2      | cullin 2                                                                            | 1.0809 | 0.0001 |
| 203079_s_at | CUL2      | cullin 2                                                                            | 1.047  | 0      |
| 203082_at   | BMS1      | BMS1 homolog; ribosome assembly protein (yeast)                                     | 0.6063 | 0.0254 |
| 203086_at   | KIF2A     | Kinesin heavy chain member 2A                                                       | 1.111  | 0.0006 |
| 203087_s_at | KIF2A     | kinesin heavy chain member 2A                                                       | 2.071  | 0      |
| 203092_at   | TIMM44    | translocase of inner mitochondrial membrane 44 homolog (yeast)                      | 0.3993 | 0.0028 |
| 203093_s_at | TIMM44    | translocase of inner mitochondrial membrane 44 homolog (yeast)                      | 0.664  | 0.0006 |
| 203097_s_at | RAPGEF2   | Rap guanine nucleotide exchange factor (GEF) 2                                      | 0.4593 | 0.023  |
| 203098_at   | CDYL      | chromodomain protein; Y-like                                                        | 0.7307 | 0.0116 |
| 203105_s_at | DNM1L     | dynamamin 1-like                                                                    | 1.0713 | 0.0011 |
| 203109_at   | UBE2M     | ubiquitin-conjugating enzyme E2M (UBC12 homolog; yeast)                             | 0.7773 | 0.0012 |
| 203112_s_at | WHSC2     | Wolf-Hirschhorn syndrome candidate 2                                                | 0.472  | 0.0025 |
| 203117_s_at | USP52     | ubiquitin specific peptidase 52                                                     | 0.8157 | 0.0203 |
| 203123_s_at | SLC11A2   | solute carrier family 11 (proton-coupled divalent metal ion transporters); member 2 | 0.9261 | 0.0286 |
| 203125_x_at | SLC11A2   | solute carrier family 11 (proton-coupled divalent metal ion transporters); member 2 | 0.628  | 0.0438 |

|             |          |                                                                                                       |        |        |
|-------------|----------|-------------------------------------------------------------------------------------------------------|--------|--------|
| 203141_s_at | AP3B1    | adaptor-related protein complex 3; beta 1 subunit                                                     | 0.4175 | 0.0457 |
| 203145_at   | SPAG5    | sperm associated antigen 5                                                                            | 2.0096 | 0.0003 |
| 203154_s_at | PAK4     | p21(CDKN1A)-activated kinase 4                                                                        | 0.8679 | 0.0006 |
| 203163_at   | KATNB1   | katanin p80 (WD repeat containing) subunit B 1                                                        | 0.79   | 0.0023 |
| 203176_s_at | TFAM     | transcription factor A; mitochondrial                                                                 | 0.5484 | 0.0262 |
| 203181_x_at | SRPK2    | SFRS protein kinase 2                                                                                 | 1.134  | 0      |
| 203182_s_at | SRPK2    | SFRS protein kinase 2                                                                                 | 0.729  | 0      |
| 203192_at   | ABCB6    | ATP-binding cassette; sub-family B (MDR/TAP); member 6                                                | 1.1232 | 0.0441 |
| 203196_at   | ABCC4    | ATP-binding cassette; sub-family C (CFTR/MRP); member 4                                               | 0.7714 | 0.0131 |
| 203198_at   | CDK9     | cyclin-dependent kinase 9 (CDC2-related kinase)                                                       | 0.8875 | 0.011  |
| 203202_at   | KRR1     | KRR1; small subunit (SSU) processome component; homolog (yeast)                                       | 0.9016 | 0.0068 |
| 203203_s_at | KRR1     | KRR1; small subunit (SSU) processome component; homolog (yeast)                                       | 0.5633 | 0.0402 |
| 203204_s_at | JMJD2A   | jumonji domain containing 2A                                                                          | 0.5626 | 0.0296 |
| 203209_at   | RFC5     | replication factor C (activator 1) 5; 36.5kDa                                                         | 2.0024 | 0      |
| 203210_s_at | RFC5     | replication factor C (activator 1) 5; 36.5kDa                                                         | 1.2016 | 0.0006 |
| 203213_at   | CDC2     | cell division cycle 2; G1 to S and G2 to M                                                            | 4.7724 | 0      |
| 203214_x_at | CDC2     | cell division cycle 2; G1 to S and G2 to M                                                            | 3.4001 | 0      |
| 203228_at   | PAFAH1B3 | platelet-activating factor acetylhydrolase; isoform lb; gamma subunit 29kDa                           | 1.5873 | 0.0002 |
| 203235_at   | THOP1    | thimet oligopeptidase 1                                                                               | 0.5134 | 0.0016 |
| 203238_s_at | NOTCH3   | Notch homolog 3 (Drosophila)                                                                          | 1.0293 | 0.0041 |
| 203253_s_at | HISPPD1  | histidine acid phosphatase domain containing 1                                                        | 0.4683 | 0.0165 |
| 203263_s_at | ARHGEF9  | Cdc42 guanine nucleotide exchange factor (GEF) 9                                                      | 1.2228 | 0.0013 |
| 203270_at   | DTYMK    | deoxythymidylate kinase (thymidylate kinase), similar to deoxythymidylate kinase (thymidylate kinase) | 0.6118 | 0.027  |
| 203276_at   | LMNB1    | lamin B1                                                                                              | 1.8554 | 0.0001 |
| 203277_at   | DFFA     | DNA fragmentation factor; 45kDa; alpha polypeptide                                                    | 0.6675 | 0.0275 |
| 203286_at   | RNF44    | ring finger protein 44                                                                                | 0.9443 | 0.0009 |
| 203288_at   | KIAA0355 | KIAA0355                                                                                              | 0.6578 | 0.0247 |
| 203301_s_at | DMTF1    | cyclin D binding myb-like transcription factor 1                                                      | 0.4131 | 0.0008 |
| 203318_s_at | ZNF148   | zinc finger protein 148                                                                               | 0.5467 | 0.0112 |
| 203319_s_at | ZNF148   | zinc finger protein 148                                                                               | 1.0227 | 0.0003 |
| 203321_s_at | ADNP2    | ADNP homeobox 2                                                                                       | 0.7351 | 0.003  |
| 203325_s_at | COL5A1   | collagen; type V; alpha 1                                                                             | 1.5371 | 0.0183 |

|             |          |                                                                     |        |        |
|-------------|----------|---------------------------------------------------------------------|--------|--------|
| 203340_s_at | SLC25A12 | solute carrier family 25 (mitochondrial carrier; Aralar); member 12 | 0.5263 | 0.0408 |
| 203345_s_at | MTF2     | metal response element binding transcription factor 2               | 0.8077 | 0.0414 |
| 203346_s_at | MTF2     | metal response element binding transcription factor 2               | 1.2006 | 0.0033 |
| 203350_at   | AP1G1    | adaptor-related protein complex 1; gamma 1 subunit                  | 0.8762 | 0.0012 |
| 203358_s_at | EZH2     | enhancer of zeste homolog 2 (Drosophila)                            | 2.8257 | 0      |
| 203362_s_at | MAD2L1   | MAD2 mitotic arrest deficient-like 1 (yeast)                        | 4.0223 | 0      |
| 203377_s_at | CDC40    | cell division cycle 40 homolog (S. cerevisiae)                      | 0.8136 | 0.0214 |
| 203383_s_at | GOLGA1   | golgi autoantigen; golgin subfamily a; 1                            | 0.5135 | 0.0416 |
| 203396_at   | PSMA4    | proteasome (prosome; macropain) subunit; alpha type; 4              | 0.2587 | 0.0291 |
| 203410_at   | AP3M2    | adaptor-related protein complex 3; mu 2 subunit                     | 1.7977 | 0      |
| 203415_at   | PDCD6    | programmed cell death 6                                             | 0.5622 | 0.0248 |
| 203418_at   | CCNA2    | cyclin A2                                                           | 2.2331 | 0.0002 |
| 203419_at   | MLL4     | myeloid/lymphoid or mixed-lineage leukemia 4                        | 1.4029 | 0      |
| 203422_at   | POLD1    | polymerase (DNA directed); delta 1; catalytic subunit 125kDa        | 1.0888 | 0.0011 |
| 203432_at   | TMPO     | thymopoietin                                                        | 2.78   | 0      |
| 203438_at   | STC2     | stanniocalcin 2                                                     | 1.2349 | 0.0305 |
| 203439_s_at | STC2     | stanniocalcin 2                                                     | 0.2896 | 0.0416 |
| 203451_at   | LDB1     | LIM domain binding 1                                                | 0.6456 | 0.0475 |
| 203459_s_at | VPS16    | vacuolar protein sorting 16 homolog (S. cerevisiae)                 | 0.7695 | 0.0005 |
| 203462_x_at | EIF3B    | eukaryotic translation initiation factor 3; subunit B               | 0.4175 | 0.0128 |
| 203476_at   | TPBG     | trophoblast glycoprotein                                            | 2.0753 | 0.0146 |
| 203481_at   | C10orf6  | chromosome 10 open reading frame 6                                  | 0.7763 | 0.0234 |
| 203484_at   | SEC61G   | Sec61 gamma subunit                                                 | 0.4117 | 0.0034 |
| 203490_at   | ELF4     | E74-like factor 4 (ets domain transcription factor)                 | 1.1521 | 0      |
| 203495_at   | LRRC14   | leucine rich repeat containing 14                                   | 0.4561 | 0.0003 |
| 203510_at   | MET      | met proto-oncogene (hepatocyte growth factor receptor)              | 1.3322 | 0.0307 |
| 203519_s_at | UPF2     | UPF2 regulator of nonsense transcripts homolog (yeast)              | 0.6804 | 0.0153 |
| 203521_s_at | ZNF318   | zinc finger protein 318                                             | 0.6653 | 0.0026 |
| 203525_s_at | APC      | adenomatosis polyposis coli                                         | 1.3339 | 0      |
| 203526_s_at | APC      | adenomatosis polyposis coli                                         | 1.7394 | 0.0001 |
| 203527_s_at | APC      | adenomatosis polyposis coli                                         | 0.4552 | 0.0345 |
| 203538_at   | CAMLG    | calcium modulating ligand                                           | 0.3754 | 0.05   |
| 203550_s_at | C1orf2   | chromosome 1 open reading frame 2                                   | 0.8765 | 0.0105 |
| 203553_s_at | MAP4K5   | mitogen-activated protein kinase kinase kinase kinase 5             | 0.9798 | 0.0342 |



|             |          |                                                                                |        |        |
|-------------|----------|--------------------------------------------------------------------------------|--------|--------|
| 203554_x_at | PTTG1    | pituitary tumor-transforming 1                                                 | 5.08   | 0      |
| 203560_at   | GGH      | gamma-glutamyl hydrolase (conjugase; foylpolymagmaglutamyl hydrolase)          | 3.2897 | 0      |
| 203562_at   | FEZ1     | fasciculation and elongation protein zeta 1 (zygin I)                          | 2.0964 | 0.0025 |
| 203564_at   | FANCG    | Fanconi anemia; complementation group G                                        | 1.5828 | 0      |
| 203569_s_at | OFD1     | oral-facial-digital syndrome 1                                                 | 0.5174 | 0.0352 |
| 203575_at   | CSNK2A2  | casein kinase 2; alpha prime polypeptide                                       | 1.1316 | 0.0003 |
| 203578_s_at | SLC7A6   | solute carrier family 7 (cationic amino acid transporter; y+ system); member 6 | 0.6381 | 0.0411 |
| 203579_s_at | SLC7A6   | solute carrier family 7 (cationic amino acid transporter; y+ system); member 6 | 1.1416 | 0.0064 |
| 203580_s_at | SLC7A6   | solute carrier family 7 (cationic amino acid transporter; y+ system); member 6 | 0.8609 | 0.0332 |
| 203590_at   | DYNC1LI2 | dynein; cytoplasmic 1; light intermediate chain 2                              | 0.7954 | 0.0003 |
| 203600_s_at | C4orf8   | chromosome 4 open reading frame 8                                              | 0.5578 | 0.0262 |
| 203625_x_at | SKP2     | S-phase kinase-associated protein 2 (p45)                                      | 2.3142 | 0      |
| 203626_s_at | SKP2     | S-phase kinase-associated protein 2 (p45)                                      | 0.7501 | 0.0291 |
| 203629_s_at | COG5     | component of oligomeric golgi complex 5                                        | 0.7715 | 0.0001 |
| 203630_s_at | COG5     | component of oligomeric golgi complex 5                                        | 1.1793 | 0      |
| 203636_at   | MID1     | midline 1 (Opitz/BBB syndrome)                                                 | 0.724  | 0.0299 |
| 203637_s_at | MID1     | midline 1 (Opitz/BBB syndrome)                                                 | 0.8052 | 0.0109 |
| 203643_at   | ERF      | Ets2 repressor factor                                                          | 0.6275 | 0.0215 |
| 203644_s_at | MON1B    | MON1 homolog B (yeast)                                                         | 0.6163 | 0.0027 |
| 203653_s_at | COIL     | coilin                                                                         | 0.7434 | 0.0085 |
| 203654_s_at | COIL     | coilin                                                                         | 0.7082 | 0.0061 |
| 203655_at   | XRCC1    | X-ray repair complementing defective repair in Chinese hamster cells 1         | 0.6251 | 0.0002 |
| 203664_s_at | POLR2D   | polymerase (RNA) II (DNA directed) polypeptide D                               | 0.9583 | 0.0044 |
| 203676_at   | GNS      | glucosamine (N-acetyl)-6-sulfatase (Sanfilippo disease IIID)                   | 1.3728 | 0.0072 |
| 203677_s_at | TARBP2   | TAR (HIV-1) RNA binding protein 2                                              | 1.4847 | 0      |
| 203695_s_at | DFNA5    | deafness; autosomal dominant 5                                                 | 2.2185 | 0.0156 |
| 203696_s_at | RFC2     | replication factor C (activator 1) 2; 40kDa                                    | 1.1526 | 0.0017 |
| 203701_s_at | TRMT1    | TRM1 tRNA methyltransferase 1 homolog (S. cerevisiae)                          | 0.5016 | 0.0256 |
| 203702_s_at | TTL4     | tubulin tyrosine ligase-like family; member 4                                  | 0.93   | 0.0091 |
| 203709_at   | PHKG2    | phosphorylase kinase; gamma 2 (testis)                                         | 0.4598 | 0.0129 |
| 203716_s_at | DPP4     | dipeptidyl-peptidase 4 (CD26; adenosine deaminase complexing protein 2)        | 1.3958 | 0.04   |

|             |           |                                                                                |        |        |
|-------------|-----------|--------------------------------------------------------------------------------|--------|--------|
| 203717_at   | DPP4      | dipeptidyl-peptidase 4 (CD26; adenosine deaminase complexing protein 2)        | 1.2531 | 0.0376 |
| 203725_at   | GADD45A   | growth arrest and DNA-damage-inducible; alpha                                  | 1.3172 | 0.0021 |
| 203726_s_at | LAMA3     | laminin; alpha 3                                                               | 0.6072 | 0.0226 |
| 203730_s_at | ZKSCAN5   | zinc finger with KRAB and SCAN domains 5                                       | 1.198  | 0      |
| 203731_s_at | ZKSCAN5   | zinc finger with KRAB and SCAN domains 5                                       | 0.4722 | 0.0002 |
| 203734_at   | FOXJ2     | forkhead box J2                                                                | 0.7173 | 0.0038 |
| 203736_s_at | PPFIBP1   | PTPRF interacting protein; binding protein 1 (liprin beta 1)                   | 0.7706 | 0.044  |
| 203738_at   | C5orf22   | chromosome 5 open reading frame 22                                             | 1.0909 | 0.0002 |
| 203744_at   | HMGB3     | high-mobility group box 3                                                      | 1.6877 | 0      |
| 203746_s_at | HCCS      | holocytochrome c synthase (cytochrome c heme-lyase)                            | 0.6523 | 0.0486 |
| 203755_at   | BUB1B     | BUB1 budding uninhibited by benzimidazoles 1 homolog beta (yeast)              | 3.6796 | 0      |
| 203764_at   | DLG7      | discs; large homolog 7 (Drosophila)                                            | 2.2849 | 0.0002 |
| 203785_s_at | DDX28     | DEAD (Asp-Glu-Ala-Asp) box polypeptide 28                                      | 0.6013 | 0.0437 |
| 203787_at   | SSBP2     | single-stranded DNA binding protein 2                                          | 1.0567 | 0.05   |
| 203795_s_at | BCL7A     | B-cell CLL/lymphoma 7A                                                         | 1.1843 | 0.0002 |
| 203796_s_at | BCL7A     | B-cell CLL/lymphoma 7A                                                         | 0.7247 | 0.0001 |
| 203802_x_at | NSUN5     | NOL1/NOP2/Sun domain family; member 5                                          | 0.9155 | 0.0001 |
| 203805_s_at | FANCA     | Fanconi anemia; complementation group A                                        | 0.9784 | 0.0042 |
| 203806_s_at | FANCA     | Fanconi anemia; complementation group A                                        | 0.3072 | 0.0476 |
| 203819_s_at | IGF2BP3   | insulin-like growth factor 2 mRNA binding protein 3                            | 1.5489 | 0.0474 |
| 203820_s_at | IGF2BP3   | insulin-like growth factor 2 mRNA binding protein 3                            | 1.6969 | 0.0404 |
| 203823_at   | RGS3      | regulator of G-protein signaling 3                                             | 1.3378 | 0.0006 |
| 203825_at   | BRD3      | bromodomain containing 3                                                       | 0.6346 | 0.0356 |
| 203828_s_at | IL32      | interleukin 32                                                                 | 1.6462 | 0.0218 |
| 203830_at   | C17orf75  | chromosome 17 open reading frame 75                                            | 0.3988 | 0.0467 |
| 203832_at   | SNRPF     | small nuclear ribonucleoprotein polypeptide F                                  | 0.6271 | 0.0007 |
| 203841_x_at | MAPRE3    | microtubule-associated protein; RP/EB family; member 3                         | 0.4697 | 0.018  |
| 203847_s_at | AKAP8     | A kinase (PRKA) anchor protein 8                                               | 0.5794 | 0.0008 |
| 203852_s_at | SMN1      | survival of motor neuron 1; telomeric, survival of motor neuron 2; centromeric | 0.5756 | 0.0456 |
| 203856_at   | VRK1      | vaccinia related kinase 1                                                      | 1.0011 | 0.0101 |
| 203883_s_at | RAB11FIP2 | RAB11 family interacting protein 2 (class I)                                   | 0.7578 | 0.0016 |
| 203890_s_at | DAPK3     | death-associated protein kinase 3                                              | 1.0653 | 0.0005 |
| 203891_s_at | DAPK3     | death-associated protein kinase 3                                              | 0.5082 | 0.0002 |

|             |         |                                                                                                |        |        |
|-------------|---------|------------------------------------------------------------------------------------------------|--------|--------|
| 203899_s_at | RCP9    | calcitonin gene-related peptide-receptor component protein                                     | 0.3773 | 0.0205 |
| 203904_x_at | CD82    | CD82 molecule                                                                                  | 0.5871 | 0.0032 |
| 203909_at   | SLC9A6  | solute carrier family 9 (sodium/hydrogen exchanger); member 6                                  | 0.4688 | 0.0411 |
| 203936_s_at | MMP9    | matrix metalloproteinase 9 (gelatinase B; 92kDa gelatinase; 92kDa type IV collagenase)         | 1.1349 | 0.028  |
| 203937_s_at | TAF1C   | TATA box binding protein (TBP)-associated factor; RNA polymerase I; C; 110kDa                  | 0.3403 | 0.0261 |
| 203938_s_at | TAF1C   | TATA box binding protein (TBP)-associated factor; RNA polymerase I; C; 110kDa                  | 0.5959 | 0.0069 |
| 203956_at   | MORC2   | MORC family CW-type zinc finger 2                                                              | 0.5876 | 0.0049 |
| 203957_at   | E2F6    | E2F transcription factor 6                                                                     | 0.6099 | 0.0142 |
| 203963_at   | CA12    | carbonic anhydrase XII                                                                         | 1.1432 | 0.025  |
| 203967_at   | CDC6    | cell division cycle 6 homolog (S. cerevisiae)                                                  | 1.4837 | 0.0004 |
| 203968_s_at | CDC6    | cell division cycle 6 homolog (S. cerevisiae)                                                  | 1.2077 | 0.0013 |
| 203974_at   | HDHD1A  | haloacid dehalogenase-like hydrolase domain containing 1A                                      | 1.3661 | 0.001  |
| 203975_s_at | CHAF1A  | chromatin assembly factor 1; subunit A (p150)                                                  | 0.8412 | 0.0018 |
| 203976_s_at | CHAF1A  | chromatin assembly factor 1; subunit A (p150)                                                  | 1.0019 | 0.0006 |
| 203977_at   | TAZ     | tafazzin (cardiomyopathy; dilated 3A (X-linked); endocardial fibroelastosis 2; Barth syndrome) | 0.284  | 0.0188 |
| 203985_at   | ZNF212  | zinc finger protein 212                                                                        | 0.4934 | 0.0102 |
| 203986_at   | STBD1   | starch binding domain 1                                                                        | 2.0252 | 0.0001 |
| 203990_s_at | UTX     | ubiquitously transcribed tetratricopeptide repeat; X chromosome                                | 0.8333 | 0.0024 |
| 203991_s_at | UTX     | ubiquitously transcribed tetratricopeptide repeat; X chromosome                                | 0.6162 | 0.0445 |
| 203992_s_at | UTX     | ubiquitously transcribed tetratricopeptide repeat; X chromosome                                | 0.8139 | 0.0353 |
| 203997_at   | PTPN3   | protein tyrosine phosphatase; non-receptor type 3                                              | 1.288  | 0.0126 |
| 204003_s_at | NUPL2   | nucleoporin like 2                                                                             | 0.8079 | 0      |
| 204009_s_at | KRAS    | v-Ki-ras2 Kirsten rat sarcoma viral oncogene homolog                                           | 0.421  | 0.0086 |
| 204013_s_at | LCMT2   | leucine carboxyl methyltransferase 2                                                           | 0.347  | 0.007  |
| 204023_at   | RFC4    | replication factor C (activator 1) 4; 37kDa                                                    | 2.3327 | 0      |
| 204024_at   | OSGIN2  | oxidative stress induced growth inhibitor family member 2                                      | 0.5231 | 0.032  |
| 204026_s_at | ZWINT   | ZW10 interactor                                                                                | 3.78   | 0      |
| 204028_s_at | RABGAP1 | RAB GTPase activating protein 1                                                                | 0.5181 | 0.0099 |
| 204033_at   | TRIP13  | thyroid hormone receptor interactor 13                                                         | 2.6232 | 0.0003 |
| 204055_s_at | CTAGE5  | CTAGE family; member 5                                                                         | 0.6307 | 0.0206 |

|             |          |                                                                                          |        |        |
|-------------|----------|------------------------------------------------------------------------------------------|--------|--------|
| 204065_at   | CHST10   | carbohydrate sulfotransferase 10                                                         | 0.8439 | 0.0375 |
| 204066_s_at | CENTG2   | centaurin; gamma 2                                                                       | 1.1457 | 0.007  |
| 204072_s_at | FRY      | furry homolog (Drosophila)                                                               | 1.8229 | 0.0007 |
| 204076_at   | ENTPD4   | ectonucleoside triphosphate diphosphohydrolase 4                                         | 0.7386 | 0.0001 |
| 204077_x_at | ENTPD4   | ectonucleoside triphosphate diphosphohydrolase 4                                         | 0.2787 | 0.0222 |
| 204092_s_at | AURKA    | aurora kinase A                                                                          | 2.2287 | 0      |
| 204107_at   | NFYA     | nuclear transcription factor Y; alpha                                                    | 0.598  | 0.0305 |
| 204126_s_at | CDC45L   | CDC45 cell division cycle 45-like (S. cerevisiae)                                        | 0.8132 | 0.0022 |
| 204129_at   | BCL9     | B-cell CLL/lymphoma 9                                                                    | 0.3393 | 0.0231 |
| 204138_s_at | MZF1     | myeloid zinc finger 1                                                                    | 0.153  | 0.0352 |
| 204139_x_at | MZF1     | myeloid zinc finger 1                                                                    | 0.8856 | 0.0038 |
| 204146_at   | RAD51AP1 | RAD51 associated protein 1                                                               | 3.0786 | 0      |
| 204148_s_at | POMZP3   | POM (POM121 homolog; rat) and ZP3 fusion, zona pellucida glycoprotein 3 (sperm receptor) | 1.143  | 0.0268 |
| 204162_at   | NDC80    | NDC80 homolog; kinetochore complex component (S. cerevisiae)                             | 2.7827 | 0      |
| 204165_at   | WASF1    | WAS protein family; member 1                                                             | 1.3667 | 0.0001 |
| 204169_at   | IMPDH1   | IMP (inosine monophosphate) dehydrogenase 1                                              | 0.4966 | 0.0129 |
| 204170_s_at | CKS2     | CDC28 protein kinase regulatory subunit 2                                                | 0.7987 | 0.0007 |
| 204172_at   | CPOX     | coproporphyrinogen oxidase                                                               | 0.6954 | 0.0251 |
| 204180_s_at | ZBTB43   | zinc finger and BTB domain containing 43                                                 | 0.822  | 0.0212 |
| 204181_s_at | ZBTB43   | zinc finger and BTB domain containing 43                                                 | 0.6957 | 0.0357 |
| 204182_s_at | ZBTB43   | zinc finger and BTB domain containing 43                                                 | 0.7054 | 0.0485 |
| 204185_x_at | PPID     | peptidylprolyl isomerase D (cyclophilin D)                                               | 0.3364 | 0.0327 |
| 204186_s_at | PPID     | peptidylprolyl isomerase D (cyclophilin D)                                               | 0.9428 | 0.0014 |
| 204195_s_at | PKNOX1   | PBX/knotted 1 homeobox 1                                                                 | 0.2444 | 0.016  |
| 204199_at   | RALGPS1  | Ral GEF with PH domain and SH3 binding motif 1                                           | 1.2545 | 0.009  |
| 204203_at   | CEBPG    | CCAAT/enhancer binding protein (C/EBP); gamma                                            | 1.3985 | 0.0005 |
| 204211_x_at | EIF2AK2  | eukaryotic translation initiation factor 2-alpha kinase 2                                | 0.255  | 0.0439 |
| 204228_at   | PPIH     | peptidylprolyl isomerase H (cyclophilin H)                                               | 0.6768 | 0.039  |
| 204240_s_at | SMC2     | structural maintenance of chromosomes 2                                                  | 1.9958 | 0.0002 |
| 204244_s_at | DBF4     | DBF4 homolog (S. cerevisiae)                                                             | 2.3014 | 0      |
| 204245_s_at | RPP14    | ribonuclease P/MRP 14kDa subunit                                                         | 0.5175 | 0.0268 |
| 204247_s_at | CDK5     | cyclin-dependent kinase 5                                                                | 0.802  | 0.0055 |
| 204250_s_at | CEP164   | centrosomal protein 164kDa                                                               | 0.19   | 0.0269 |
| 204251_s_at | CEP164   | centrosomal protein 164kDa                                                               | 0.4626 | 0.0243 |
| 204252_at   | CDK2     | cyclin-dependent kinase 2                                                                | 1.7388 | 0      |

|             |           |                                                                                                                                                                                                                                                                      |        |        |
|-------------|-----------|----------------------------------------------------------------------------------------------------------------------------------------------------------------------------------------------------------------------------------------------------------------------|--------|--------|
| 204267_x_at | PKMYT1    | protein kinase; membrane associated tyrosine/threonine 1                                                                                                                                                                                                             | 0.7834 | 0.0011 |
| 204275_at   | SOLH      | small optic lobes homolog (Drosophila)                                                                                                                                                                                                                               | 0.48   | 0.0055 |
| 204285_s_at | PMAIP1    | phorbol-12-myristate-13-acetate-induced protein 1                                                                                                                                                                                                                    | 2.3442 | 0.0021 |
| 204286_s_at | PMAIP1    | phorbol-12-myristate-13-acetate-induced protein 1                                                                                                                                                                                                                    | 2.0803 | 0.0042 |
| 204291_at   | ZNF518    | zinc finger protein 518                                                                                                                                                                                                                                              | 0.8358 | 0.0127 |
| 204299_at   | FUSIP1    | FUS interacting protein (serine/arginine-rich) 1, similar to FUS-interacting serine-arginine-rich protein 1 (TLS-associated protein with Ser-Arg repeats) (TASR) (TLS-associated serine-arginine protein) (TLS-associated SR protein) (Neural-specific SR protein... | 0.6166 | 0.0033 |
| 204302_s_at | KIAA0427  | KIAA0427                                                                                                                                                                                                                                                             | 0.308  | 0.0174 |
| 204303_s_at | KIAA0427  | KIAA0427                                                                                                                                                                                                                                                             | 0.9866 | 0.0017 |
| 204315_s_at | GTSE1     | G-2 and S-phase expressed 1                                                                                                                                                                                                                                          | 1.1378 | 0.0028 |
| 204318_s_at | GTSE1     | G-2 and S-phase expressed 1                                                                                                                                                                                                                                          | 2.0597 | 0.0003 |
| 204320_at   | COL11A1   | collagen; type XI; alpha 1                                                                                                                                                                                                                                           | 3.0856 | 0.0064 |
| 204325_s_at | NF1       | neurofibromin 1 (neurofibromatosis; von Recklinghausen disease; Watson disease)                                                                                                                                                                                      | 0.3755 | 0.0116 |
| 204329_s_at | ZNF202    | zinc finger protein 202                                                                                                                                                                                                                                              | 0.244  | 0.0293 |
| 204330_s_at | MRPS12    | mitochondrial ribosomal protein S12                                                                                                                                                                                                                                  | 0.3254 | 0.0072 |
| 204331_s_at | MRPS12    | mitochondrial ribosomal protein S12                                                                                                                                                                                                                                  | 0.5358 | 0.0231 |
| 204347_at   | AK3L2     | adenylate kinase 3-like 2                                                                                                                                                                                                                                            | 1.641  | 0.0043 |
| 204348_s_at | AK3L1     | adenylate kinase 3-like 1, adenylate kinase 3-like 2, similar to Adenylate kinase isoenzyme 4; mitochondrial (ATP-AMP transphosphorylase)                                                                                                                            | 2.8316 | 0.0005 |
| 204352_at   | TRAF5     | TNF receptor-associated factor 5                                                                                                                                                                                                                                     | 1.2546 | 0.0316 |
| 204353_s_at | POT1      | POT1 protection of telomeres 1 homolog (S. pombe)                                                                                                                                                                                                                    | 1.0758 | 0.0023 |
| 204354_at   | POT1      | POT1 protection of telomeres 1 homolog (S. pombe)                                                                                                                                                                                                                    | 0.6915 | 0.0004 |
| 204372_s_at | KHSRP     | KH-type splicing regulatory protein (FUSE binding protein 2)                                                                                                                                                                                                         | 0.4802 | 0.0013 |
| 204375_at   | CLSTN3    | calsyntenin 3                                                                                                                                                                                                                                                        | 0.5818 | 0.0151 |
| 204384_at   | GOLGA2    | golgi autoantigen; golgin subfamily a; 2                                                                                                                                                                                                                             | 0.8426 | 0.0112 |
| 204403_x_at | FAM115A   | family with sequence similarity 115; member A                                                                                                                                                                                                                        | 0.5391 | 0.0034 |
| 204413_at   | TRAF2     | TNF receptor-associated factor 2                                                                                                                                                                                                                                     | 0.1941 | 0.0056 |
| 204432_at   | SOX12     | SRY (sex determining region Y)-box 12                                                                                                                                                                                                                                | 0.9318 | 0      |
| 204434_at   | SPATA2    | spermatogenesis associated 2                                                                                                                                                                                                                                         | 0.6623 | 0.0373 |
| 204441_s_at | POLA2     | polymerase (DNA directed); alpha 2 (70kD subunit)                                                                                                                                                                                                                    | 0.6256 | 0.0121 |
| 204444_at   | KIF11     | kinesin family member 11                                                                                                                                                                                                                                             | 3.0331 | 0      |
| 204447_at   | ProSAPiP1 | ProSAPiP1 protein                                                                                                                                                                                                                                                    | 0.5922 | 0.0417 |

|             |           |                                                                                                                               |        |        |
|-------------|-----------|-------------------------------------------------------------------------------------------------------------------------------|--------|--------|
| 204448_s_at | PDCL      | phosducin-like                                                                                                                | 0.5305 | 0.0154 |
| 204449_at   | PDCL      | phosducin-like                                                                                                                | 0.7585 | 0.0007 |
| 204453_at   | ZNF84     | zinc finger protein 84                                                                                                        | 1.281  | 0      |
| 204458_at   | LYPLA3    | lysophospholipase 3 (lysosomal phospholipase A2)                                                                              | 0.521  | 0.0403 |
| 204461_x_at | RAD1      | RAD1 homolog (S. pombe)                                                                                                       | 0.5936 | 0.0056 |
| 204475_at   | MMP1      | matrix metalloproteinase 1 (interstitial collagenase)                                                                         | 0.3665 | 0.0335 |
| 204483_at   | ENO3      | enolase 3 (beta; muscle)                                                                                                      | 0.6102 | 0.0176 |
| 204491_at   | PDE4D     | phosphodiesterase 4D; cAMP-specific (phosphodiesterase E3 dunce homolog; Drosophila)                                          | 1.6112 | 0.0081 |
| 204492_at   | ARHGAP11A | Rho GTPase activating protein 11A                                                                                             | 0.3183 | 0.0041 |
| 204494_s_at | C15orf39  | chromosome 15 open reading frame 39                                                                                           | 1.1881 | 0.0003 |
| 204495_s_at | C15orf39  | chromosome 15 open reading frame 39                                                                                           | 0.5705 | 0.0061 |
| 204504_s_at | HIRIP3    | HIRA interacting protein 3                                                                                                    | 0.7366 | 0.0097 |
| 204508_s_at | CA12      | carbonic anhydrase XII                                                                                                        | 0.3158 | 0.0496 |
| 204510_at   | CDC7      | cell division cycle 7 homolog (S. cerevisiae)                                                                                 | 1.9137 | 0.0009 |
| 204512_at   | HIVP1     | human immunodeficiency virus type I enhancer binding protein 1                                                                | 0.9667 | 0.0016 |
| 204521_at   | C12orf24  | chromosome 12 open reading frame 24                                                                                           | 1.0836 | 0.0008 |
| 204525_at   | PHF14     | PHD finger protein 14                                                                                                         | 0.6912 | 0.0014 |
| 204526_s_at | TBC1D8    | TBC1 domain family; member 8 (with GRAM domain)                                                                               | 1.5062 | 0.0134 |
| 204531_s_at | BRCA1     | breast cancer 1; early onset                                                                                                  | 0.9675 | 0.0009 |
| 204538_x_at | LOC339047 | hypothetical protein LOC339047, nuclear pore complex interacting protein, similar to nuclear pore complex interacting protein | 0.6869 | 0.0016 |
| 204555_s_at | PPP1R3D   | protein phosphatase 1; regulatory (inhibitor) subunit 3D                                                                      | 0.2308 | 0.0212 |
| 204557_s_at | DZIP1     | DAZ interacting protein 1                                                                                                     | 1.2712 | 0.0466 |
| 204558_at   | RAD54L    | RAD54-like (S. cerevisiae)                                                                                                    | 0.7271 | 0.0067 |
| 204559_s_at | LSM7      | LSM7 homolog; U6 small nuclear RNA associated (S. cerevisiae)                                                                 | 0.6241 | 0.0014 |
| 204579_at   | FGFR4     | fibroblast growth factor receptor 4                                                                                           | 1.7115 | 0.0172 |
| 204586_at   | BSN       | bassoon (presynaptic cytomatrix protein)                                                                                      | 0.4198 | 0.0347 |
| 204595_s_at | STC1      | stanniocalcin 1                                                                                                               | 4.0226 | 0      |
| 204596_s_at | STC1      | stanniocalcin 1                                                                                                               | 1.7396 | 0.0031 |
| 204597_x_at | STC1      | stanniocalcin 1                                                                                                               | 2.9383 | 0      |
| 204601_at   | N4BP1     | Nedd4 binding protein 1                                                                                                       | 0.5634 | 0.0005 |
| 204603_at   | EXO1      | exonuclease 1                                                                                                                 | 0.9358 | 0.0012 |
| 204608_at   | ASL       | argininosuccinate lyase                                                                                                       | 0.7599 | 0.0078 |
| 204617_s_at | ACD       | adrenocortical dysplasia homolog (mouse)                                                                                      | 0.7469 | 0.0202 |
| 204641_at   | NEK2      | NIMA (never in mitosis gene a)-related kinase 2                                                                               | 2.4532 | 0.0001 |
| 204649_at   | TROAP     | trophinin associated protein (tastin)                                                                                         | 1.2317 | 0.0005 |

|             |          |                                                                                                                                                    |        |        |
|-------------|----------|----------------------------------------------------------------------------------------------------------------------------------------------------|--------|--------|
| 204651_at   | NRF1     | nuclear respiratory factor 1                                                                                                                       | 0.302  | 0.0371 |
| 204652_s_at | NRF1     | nuclear respiratory factor 1                                                                                                                       | 0.1665 | 0.0405 |
| 204662_at   | CP110    | CP110 protein                                                                                                                                      | 1.0807 | 0      |
| 204666_s_at | SIKE     | suppressor of IKK epsilon                                                                                                                          | 0.583  | 0.0202 |
| 204675_at   | SRD5A1   | steroid-5-alpha-reductase; alpha polypeptide 1 (3-oxo-5 alpha-steroid delta 4-dehydrogenase alpha 1)                                               | 2.3358 | 0.0001 |
| 204678_s_at | KCNK1    | potassium channel; subfamily K; member 1                                                                                                           | 1.3529 | 0.0181 |
| 204679_at   | KCNK1    | potassium channel; subfamily K; member 1                                                                                                           | 1.4929 | 0.0323 |
| 204685_s_at | ATP2B2   | ATPase; Ca++ transporting; plasma membrane 2                                                                                                       | 2.1613 | 0.0092 |
| 204695_at   | CDC25A   | cell division cycle 25 homolog A (S. pombe)                                                                                                        | 1.4316 | 0.0007 |
| 204698_at   | ISG20    | interferon stimulated exonuclease gene 20kDa                                                                                                       | 1.0884 | 0.0496 |
| 204699_s_at | C1orf107 | chromosome 1 open reading frame 107                                                                                                                | 0.4823 | 0.0481 |
| 204709_s_at | KIF23    | kinesin family member 23                                                                                                                           | 1.9101 | 0.0007 |
| 204710_s_at | WIPI2    | WD repeat domain; phosphoinositide interacting 2                                                                                                   | 0.7663 | 0      |
| 204726_at   | CDH13    | cadherin 13; H-cadherin (heart)                                                                                                                    | 0.551  | 0.0001 |
| 204727_at   | WDHD1    | WD repeat and HMG-box DNA binding protein 1                                                                                                        | 0.6913 | 0.0002 |
| 204728_s_at | WDHD1    | WD repeat and HMG-box DNA binding protein 1                                                                                                        | 0.7762 | 0.0097 |
| 204732_s_at | TRIM23   | tripartite motif-containing 23                                                                                                                     | 0.7604 | 0.0094 |
| 204741_at   | BICD1    | bicaudal D homolog 1 (Drosophila)                                                                                                                  | 0.4748 | 0.0103 |
| 204742_s_at | PDS5B    | PDS5; regulator of cohesion maintenance; homolog B (S. cerevisiae)                                                                                 | 0.8042 | 0.0105 |
| 204744_s_at | IARS     | isoleucyl-tRNA synthetase                                                                                                                          | 0.3421 | 0.0099 |
| 204752_x_at | PARP2    | poly (ADP-ribose) polymerase family; member 2                                                                                                      | 0.7361 | 0.0062 |
| 204760_s_at | NR1D1    | nuclear receptor subfamily 1; group D; member 1, thyroid hormone receptor; alpha (erythroblastic leukemia viral (v-erb-a) oncogene homolog; avian) | 1.8773 | 0.0001 |
| 204766_s_at | NUDT1    | nudix (nucleoside diphosphate linked moiety X)-type motif 1                                                                                        | 1.0139 | 0.0011 |
| 204767_s_at | FEN1     | flap structure-specific endonuclease 1                                                                                                             | 0.7129 | 0.0394 |
| 204768_s_at | FEN1     | flap structure-specific endonuclease 1                                                                                                             | 1.384  | 0.0019 |
| 204771_s_at | TTF1     | transcription termination factor; RNA polymerase I                                                                                                 | 0.5014 | 0.032  |
| 204775_at   | CHAF1B   | chromatin assembly factor 1; subunit B (p60)                                                                                                       | 0.3485 | 0.0042 |
| 204776_at   | THBS4    | thrombospondin 4                                                                                                                                   | 1.3602 | 0.0024 |
| 204783_at   | MLF1     | myeloid leukemia factor 1                                                                                                                          | 1.5907 | 0.0002 |
| 204784_s_at | MLF1     | myeloid leukemia factor 1                                                                                                                          | 1.6568 | 0.0001 |
| 204791_at   | NR2C1    | nuclear receptor subfamily 2; group C; member 1                                                                                                    | 0.638  | 0.0059 |
| 204795_at   | PRR3     | proline rich 3                                                                                                                                     | 0.684  | 0.0276 |

|             |         |                                                            |        |        |
|-------------|---------|------------------------------------------------------------|--------|--------|
| 204797_s_at | EML1    | echinoderm microtubule associated protein like 1           | 1.1569 | 0.0375 |
| 204805_s_at | H1FX    | H1 histone family; member X                                | 0.6679 | 0.0104 |
| 204817_at   | ESPL1   | extra spindle pole bodies homolog 1 (S. cerevisiae)        | 1.0522 | 0.001  |
| 204822_at   | TTK     | TTK protein kinase                                         | 3.2606 | 0      |
| 204825_at   | MELK    | maternal embryonic leucine zipper kinase                   | 3.3022 | 0      |
| 204826_at   | CCNF    | cyclin F                                                   | 0.5103 | 0.0002 |
| 204827_s_at | CCNF    | cyclin F                                                   | 0.2651 | 0.0047 |
| 204828_at   | RAD9A   | RAD9 homolog A (S. pombe)                                  | 0.7703 | 0.002  |
| 204831_at   | CDK8    | cyclin-dependent kinase 8                                  | 0.9052 | 0.0135 |
| 204833_at   | ATG12   | ATG12 autophagy related 12 homolog (S. cerevisiae)         | 0.6902 | 0.0174 |
| 204835_at   | POLA1   | polymerase (DNA directed); alpha 1                         | 1.217  | 0.0012 |
| 204840_s_at | EEA1    | early endosome antigen 1                                   | 0.8366 | 0.0013 |
| 204842_x_at | PRKAR2A | protein kinase; cAMP-dependent; regulatory; type II; alpha | 0.3333 | 0.0136 |
| 204849_at   | TCFL5   | transcription factor-like 5 (basic helix-loop-helix)       | 1.2282 | 0.0049 |
| 204853_at   | ORC2L   | origin recognition complex; subunit 2-like (yeast)         | 0.9816 | 0.0104 |
| 204859_s_at | APAF1   | apoptotic peptidase activating factor 1                    | 1.4709 | 0      |
| 204871_at   | MTERF   | mitochondrial transcription termination factor             | 0.6879 | 0.0113 |
| 204873_at   | PEX1    | peroxisome biogenesis factor 1                             | 0.4451 | 0.0283 |
| 204884_s_at | HUS1    | HUS1 checkpoint homolog (S. pombe)                         | 0.3287 | 0.0282 |
| 204886_at   | PLK4    | polo-like kinase 4 (Drosophila)                            | 1.5189 | 0.0001 |
| 204887_s_at | PLK4    | polo-like kinase 4 (Drosophila)                            | 1.6667 | 0.0001 |
| 204899_s_at | SAP30   | Sin3A-associated protein; 30kDa                            | 0.527  | 0.0202 |
| 204900_x_at | SAP30   | Sin3A-associated protein; 30kDa                            | 0.9154 | 0.0011 |
| 204903_x_at | ATG4B   | ATG4 autophagy related 4 homolog B (S. cerevisiae)         | 0.3472 | 0.0338 |
| 204946_s_at | TOP3A   | topoisomerase (DNA) III alpha                              | 0.3353 | 0.0005 |
| 204947_at   | E2F1    | E2F transcription factor 1                                 | 0.585  | 0      |
| 204950_at   | CARD8   | caspase recruitment domain family; member 8                | 1.4421 | 0.0006 |
| 204957_at   | ORC5L   | origin recognition complex; subunit 5-like (yeast)         | 1.7204 | 0      |
| 204962_s_at | CENPA   | centromere protein A                                       | 2.2264 | 0.0003 |
| 204967_at   | SHROOM2 | shroom family member 2                                     | 1.444  | 0.0314 |
| 204975_at   | EMP2    | epithelial membrane protein 2                              | 1.6209 | 0.0109 |
| 204978_at   | SFRS16  | splicing factor; arginine/serine-rich 16                   | 0.6746 | 0.0089 |
| 204982_at   | GIT2    | G protein-coupled receptor kinase interactor 2             | 0.5304 | 0.0379 |
| 204992_s_at | PFN2    | profilin 2                                                 | 0.6835 | 0.0184 |
| 204995_at   | CDK5R1  | cyclin-dependent kinase 5; regulatory subunit 1 (p35)      | 0.7646 | 0.0013 |
| 205005_s_at | NMT2    | N-myristoyltransferase 2                                   | 0.8311 | 0.0287 |



|             |           |                                                                               |        |        |
|-------------|-----------|-------------------------------------------------------------------------------|--------|--------|
| 205010_at   | GNL3L     | guanine nucleotide binding protein-like 3 (nucleolar)-like                    | 1.1985 | 0.013  |
| 205023_at   | RAD51     | RAD51 homolog (RecA homolog; E. coli) (S. cerevisiae)                         | 0.1827 | 0.0038 |
| 205024_s_at | RAD51     | RAD51 homolog (RecA homolog; E. coli) (S. cerevisiae)                         | 0.9888 | 0.0005 |
| 205034_at   | CCNE2     | cyclin E2                                                                     | 1.7452 | 0.0013 |
| 205046_at   | CENPE     | centromere protein E; 312kDa                                                  | 1.4917 | 0.0002 |
| 205047_s_at | ASNS      | asparagine synthetase                                                         | 1.9357 | 0      |
| 205051_s_at | KIT       | v-kit Hardy-Zuckerman 4 feline sarcoma viral oncogene homolog                 | 2.3871 | 0.0003 |
| 205053_at   | PRIM1     | primase; DNA; polypeptide 1 (49kDa)                                           | 1.7435 | 0.0001 |
| 205060_at   | LOC727726 | poly (ADP-ribose) glycohydrolase, similar to poly (ADP-ribose) glycohydrolase | 0.3662 | 0.0066 |
| 205061_s_at | EXOSC9    | exosome component 9                                                           | 0.3284 | 0.0478 |
| 205062_x_at | ARID4A    | AT rich interactive domain 4A (RBP1-like)                                     | 0.826  | 0.0015 |
| 205063_at   | SIP1      | survival of motor neuron protein interacting protein 1                        | 0.7002 | 0.0087 |
| 205070_at   | ING3      | inhibitor of growth family; member 3                                          | 0.9115 | 0.0033 |
| 205071_x_at | XRCC4     | X-ray repair complementing defective repair in Chinese hamster cells 4        | 0.6804 | 0.0065 |
| 205072_s_at | XRCC4     | X-ray repair complementing defective repair in Chinese hamster cells 4        | 0.6685 | 0.0004 |
| 205088_at   | CXorf6    | chromosome X open reading frame 6                                             | 1.5572 | 0.0103 |
| 205089_at   | ZNF7      | zinc finger protein 7                                                         | 0.7324 | 0.0012 |
| 205090_s_at | NAGPA     | N-acetylglucosamine-1-phosphodiester alpha-N-acetylglucosaminidase            | 1.166  | 0.0005 |
| 205091_x_at | RECQL     | RecQ protein-like (DNA helicase Q1-like)                                      | 0.5568 | 0.0163 |
| 205095_s_at | ATP6V0A1  | ATPase; H+ transporting; lysosomal V0 subunit a1                              | 0.6802 | 0.0338 |
| 205106_at   | MTCP1     | mature T-cell proliferation 1                                                 | 0.4921 | 0.0087 |
| 205107_s_at | EFNA4     | ephrin-A4                                                                     | 0.6021 | 0.0494 |
| 205111_s_at | PLCE1     | phospholipase C; epsilon 1                                                    | 1.3435 | 0.0201 |
| 205112_at   | PLCE1     | phospholipase C; epsilon 1                                                    | 1.1755 | 0.0302 |
| 205113_at   | NEFM      | neurofilament; medium polypeptide 150kDa                                      | 1.975  | 0.019  |
| 205115_s_at | RBM19     | RNA binding motif protein 19                                                  | 1.3259 | 0.0018 |
| 205122_at   | TMEFF1    | transmembrane protein with EGF-like and two follistatin-like domains 1        | 1.4779 | 0.0002 |
| 205123_s_at | TMEFF1    | transmembrane protein with EGF-like and two follistatin-like domains 1        | 0.5041 | 0.0113 |
| 205146_x_at | APBA3     | amyloid beta (A4) precursor protein-binding; family A; member 3 (X11-like 2)  | 0.36   | 0.0129 |
| 205148_s_at | CLCN4     | chloride channel 4                                                            | 0.7966 | 0.0019 |
| 205149_s_at | CLCN4     | chloride channel 4                                                            | 0.3525 | 0.0232 |

|             |           |                                                                                       |        |        |
|-------------|-----------|---------------------------------------------------------------------------------------|--------|--------|
| 205162_at   | ERCC8     | excision repair cross-complementing rodent repair deficiency; complementation group 8 | 0.6317 | 0.0304 |
| 205167_s_at | CDC25C    | cell division cycle 25 homolog C (S. pombe)                                           | 1.5021 | 0.0003 |
| 205176_s_at | ITGB3BP   | integrin beta 3 binding protein (beta3-endonexin)                                     | 0.9312 | 0.0054 |
| 205178_s_at | RBBP6     | retinoblastoma binding protein 6                                                      | 0.8452 | 0.0022 |
| 205181_at   | ZNF193    | zinc finger protein 193                                                               | 0.8976 | 0.0088 |
| 205182_s_at | ZNF324    | zinc finger protein 324                                                               | 0.6012 | 0.0118 |
| 205187_at   | SMAD5     | SMAD family member 5                                                                  | 1.1093 | 0.0023 |
| 205188_s_at | SMAD5     | SMAD family member 5                                                                  | 0.9348 | 0.0129 |
| 205194_at   | PSPH      | phosphoserine phosphatase                                                             | 1.4069 | 0.0003 |
| 205195_at   | AP1S1     | adaptor-related protein complex 1; sigma 1 subunit                                    | 2.0717 | 0.0001 |
| 205196_s_at | AP1S1     | adaptor-related protein complex 1; sigma 1 subunit                                    | 2.2679 | 0.0002 |
| 205209_at   | ACVR1B    | activin A receptor; type IB                                                           | 0.3824 | 0.0156 |
| 205218_at   | POLR3F    | polymerase (RNA) III (DNA directed) polypeptide F; 39 kDa                             | 0.5124 | 0.0299 |
| 205222_at   | EHHADH    | enoyl-Coenzyme A; hydratase/3-hydroxyacyl Coenzyme A dehydrogenase                    | 0.8054 | 0.0155 |
| 205228_at   | RBMS2     | RNA binding motif; single stranded interacting protein 2                              | 0.2982 | 0.0143 |
| 205232_s_at | PAFAH2    | platelet-activating factor acetylhydrolase 2; 40kDa                                   | 0.5606 | 0.0182 |
| 205233_s_at | PAFAH2    | platelet-activating factor acetylhydrolase 2; 40kDa                                   | 0.4416 | 0.0322 |
| 205235_s_at | MPHOSPH1  | M-phase phosphoprotein 1                                                              | 1.8257 | 0      |
| 205238_at   | CXorf34   | chromosome X open reading frame 34                                                    | 1.0693 | 0.0098 |
| 205240_at   | GPSM2     | G-protein signaling modulator 2 (AGS3-like; C. elegans)                               | 1.0342 | 0.0141 |
| 205244_s_at | SLC13A3   | solute carrier family 13 (sodium-dependent dicarboxylate transporter); member 3       | 0.7271 | 0.0454 |
| 205250_s_at | CEP290    | centrosomal protein 290kDa                                                            | 0.983  | 0.0001 |
| 205252_at   | ZNF174    | zinc finger protein 174                                                               | 0.6975 | 0      |
| 205256_at   | ZBTB39    | zinc finger and BTB domain containing 39                                              | 0.5029 | 0.0006 |
| 205262_at   | KCNH2     | potassium voltage-gated channel; subfamily H (eag-related); member 2                  | 1.8411 | 0.0042 |
| 205264_at   | CD3EAP    | CD3e molecule; epsilon associated protein                                             | 0.6344 | 0.0266 |
| 205278_at   | GAD1      | glutamate decarboxylase 1 (brain; 67kDa)                                              | 2.5168 | 0.0008 |
| 205296_at   | RBL1      | retinoblastoma-like 1 (p107)                                                          | 1.3511 | 0      |
| 205300_s_at | U1SNRNPBP | U11/U12 snRNP 35K                                                                     | 0.435  | 0.0301 |
| 205308_at   | C8orf70   | chromosome 8 open reading frame 70                                                    | 1.4545 | 0      |
| 205310_at   | FBXO46    | F-box protein 46                                                                      | 0.4345 | 0.0415 |

|             |          |                                                                                                 |        |        |
|-------------|----------|-------------------------------------------------------------------------------------------------|--------|--------|
| 205315_s_at | SNTB2    | syntrophin; beta 2 (dystrophin-associated protein A1; 59kDa; basic component 2)                 | 1.2658 | 0.0009 |
| 205339_at   | STIL     | SCL/TAL1 interrupting locus                                                                     | 2.0041 | 0.0001 |
| 205340_at   | ZBTB24   | zinc finger and BTB domain containing 24                                                        | 0.6359 | 0.0111 |
| 205345_at   | BARD1    | BRCA1 associated RING domain 1                                                                  | 2.6194 | 0      |
| 205346_at   | ST3GAL2  | ST3 beta-galactoside alpha-2,3-sialyltransferase 2                                              | 0.4169 | 0.0037 |
| 205347_s_at | TMSL8    | thymosin-like 8                                                                                 | 1.6408 | 0.0265 |
| 205348_s_at | DYNC111  | dynein; cytoplasmic 1; intermediate chain 1                                                     | 1.8168 | 0.0093 |
| 205367_at   | SH2B2    | SH2B adaptor protein 2                                                                          | 0.6258 | 0.0041 |
| 205386_s_at | MDM2     | Mdm2; transformed 3T3 cell double minute 2; p53 binding protein (mouse)                         | 0.7488 | 0.0038 |
| 205393_s_at | CHEK1    | CHK1 checkpoint homolog (S. pombe)                                                              | 1.211  | 0.003  |
| 205394_at   | CHEK1    | CHK1 checkpoint homolog (S. pombe)                                                              | 1.6307 | 0.0006 |
| 205396_at   | SMAD3    | SMAD family member 3                                                                            | 0.2546 | 0.0155 |
| 205397_x_at | SMAD3    | SMAD family member 3                                                                            | 0.2361 | 0.0225 |
| 205398_s_at | SMAD3    | SMAD family member 3                                                                            | 0.625  | 0.0011 |
| 205401_at   | AGPS     | alkylglycerone phosphate synthase                                                               | 1.0527 | 0.0123 |
| 205408_at   | MLLT10   | myeloid/lymphoid or mixed-lineage leukemia (trithorax homolog; Drosophila); translocated to; 10 | 0.9294 | 0.0132 |
| 205425_at   | HIP1     | huntingtin interacting protein 1                                                                | 1.5275 | 0.0005 |
| 205426_s_at | HIP1     | huntingtin interacting protein 1                                                                | 0.3822 | 0.0166 |
| 205427_at   | ZNF354A  | zinc finger protein 354A                                                                        | 0.831  | 0.0173 |
| 205429_s_at | MPP6     | membrane protein; palmitoylated 6 (MAGUK p55 subfamily member 6)                                | 1.1443 | 0.039  |
| 205437_at   | ZNF211   | zinc finger protein 211                                                                         | 0.5335 | 0.0392 |
| 205447_s_at | MAP3K12  | mitogen-activated protein kinase kinase kinase 12                                               | 0.5285 | 0.0319 |
| 205449_at   | SAC3D1   | SAC3 domain containing 1                                                                        | 0.724  | 0.0231 |
| 205457_at   | C6orf106 | chromosome 6 open reading frame 106                                                             | 0.3004 | 0.0411 |
| 205458_at   | MC1R     | melanocortin 1 receptor (alpha melanocyte stimulating hormone receptor)                         | 0.7946 | 0.0012 |
| 205461_at   | RAB35    | RAB35; member RAS oncogene family                                                               | 0.5932 | 0.009  |
| 205493_s_at | DPYSL4   | dihydropyrimidinase-like 4                                                                      | 1.8365 | 0.0154 |
| 205494_at   | LOC55565 | hypothetical protein LOC55565                                                                   | 0.1566 | 0.0249 |
| 205497_at   | ZNF175   | zinc finger protein 175                                                                         | 0.5537 | 0.008  |
| 205511_at   | FLJ10038 | hypothetical protein FLJ10038                                                                   | 0.2446 | 0.0472 |
| 205519_at   | WDR76    | WD repeat domain 76                                                                             | 0.3723 | 0.0036 |
| 205546_s_at | TYK2     | tyrosine kinase 2                                                                               | 0.6971 | 0      |
| 205548_s_at | BTG3     | BTG family; member 3                                                                            | 0.7929 | 0.0054 |
| 205567_at   | CHST1    | carbohydrate (keratan sulfate Gal-6) sulfotransferase 1                                         | 1.3976 | 0.0245 |

|             |          |                                                                         |        |        |
|-------------|----------|-------------------------------------------------------------------------|--------|--------|
| 205569_at   | LAMP3    | lysosomal-associated membrane protein 3                                 | 1.0574 | 0.0151 |
| 205572_at   | ANGPT2   | angiopoietin 2                                                          | 3.2439 | 0      |
| 205586_x_at | VGF      | VGF nerve growth factor inducible                                       | 0.723  | 0.0265 |
| 205598_at   | TRAIP    | TRAF interacting protein                                                | 0.4279 | 0      |
| 205604_at   | HOXD9    | homeobox D9                                                             | 0.9017 | 0.0045 |
| 205606_at   | LRP6     | low density lipoprotein receptor-related protein 6                      | 0.9291 | 0.0002 |
| 205625_s_at | CALB1    | calbindin 1; 28kDa                                                      | 3.7776 | 0.0044 |
| 205626_s_at | CALB1    | calbindin 1; 28kDa                                                      | 3.6207 | 0.0046 |
| 205628_at   | PRIM2    | primase; DNA; polypeptide 2 (58kDa)                                     | 0.8309 | 0.0002 |
| 205642_at   | CEP110   | centrosomal protein 110kDa                                              | 0.5222 | 0.0287 |
| 205647_at   | RAD52    | RAD52 homolog (S. cerevisiae)                                           | 0.5351 | 0.0267 |
| 205655_at   | MDM4     | Mdm4; transformed 3T3 cell double minute 4; p53 binding protein (mouse) | 0.2459 | 0.0433 |
| 205658_s_at | SNAPC4   | small nuclear RNA activating complex; polypeptide 4; 190kDa             | 0.5732 | 0.0068 |
| 205687_at   | UBFD1    | ubiquitin family domain containing 1                                    | 1.3949 | 0.0002 |
| 205690_s_at | BUD31    | BUD31 homolog (S. cerevisiae)                                           | 0.4136 | 0.021  |
| 205700_at   | HSD17B6  | hydroxysteroid (17-beta) dehydrogenase 6 homolog (mouse)                | 1.5506 | 0.0446 |
| 205701_at   | IPO8     | importin 8                                                              | 0.5157 | 0.0139 |
| 205704_s_at | ATP6V0A2 | ATPase; H+ transporting; lysosomal V0 subunit a2                        | 1.0943 | 0.0077 |
| 205705_at   | ANKRD26  | ankyrin repeat domain 26                                                | 0.2746 | 0.0083 |
| 205706_s_at | ANKRD26  | ankyrin repeat domain 26                                                | 0.4236 | 0.0101 |
| 205716_at   | SLC25A40 | solute carrier family 25; member 40                                     | 0.8278 | 0.0072 |
| 205731_s_at | NCOA2    | nuclear receptor coactivator 2                                          | 0.4812 | 0.0303 |
| 205732_s_at | NCOA2    | nuclear receptor coactivator 2                                          | 0.8121 | 0.034  |
| 205733_at   | BLM      | Bloom syndrome                                                          | 0.788  | 0.0465 |
| 205740_s_at | RBM42    | RNA binding motif protein 42                                            | 0.5114 | 0.0029 |
| 205761_s_at | DUS4L    | dihydrouridine synthase 4-like (S. cerevisiae)                          | 0.9976 | 0.0019 |
| 205762_s_at | DUS4L    | dihydrouridine synthase 4-like (S. cerevisiae)                          | 0.5528 | 0.0012 |
| 205770_at   | GSR      | glutathione reductase                                                   | 0.9882 | 0.0282 |
| 205787_x_at | ZC3H11A  | zinc finger CCCH-type containing 11A                                    | 0.6716 | 0.0355 |
| 205791_x_at | ZNF230   | zinc finger protein 230                                                 | 0.3769 | 0.0232 |
| 205802_at   | TRPC1    | transient receptor potential cation channel; subfamily C; member 1      | 1.1937 | 0.0134 |
| 205803_s_at | TRPC1    | transient receptor potential cation channel; subfamily C; member 1      | 1.8001 | 0.0008 |
| 205807_s_at | TUFT1    | tufelin 1                                                               | 1.2708 | 0.0021 |
| 205809_s_at | WASL     | Wiskott-Aldrich syndrome-like                                           | 1.42   | 0.0001 |
| 205810_s_at | WASL     | Wiskott-Aldrich syndrome-like                                           | 0.3771 | 0.0135 |
| 205811_at   | POLG2    | polymerase (DNA directed); gamma 2; accessory subunit                   | 0.7267 | 0.006  |

|             |          |                                                                                        |        |        |
|-------------|----------|----------------------------------------------------------------------------------------|--------|--------|
| 205812_s_at | TMED9    | transmembrane emp24 protein transport domain containing 9                              | 0.4365 | 0.0229 |
| 205813_s_at | MAT1A    | methionine adenosyltransferase I; alpha                                                | 0.5202 | 0.0395 |
| 205822_s_at | HMGCS1   | 3-hydroxy-3-methylglutaryl-Coenzyme A synthase 1 (soluble)                             | 1.9259 | 0.04   |
| 205830_at   | CLGN     | calmegin                                                                               | 2.3124 | 0.0027 |
| 205851_at   | NME6     | non-metastatic cells 6; protein expressed in (nucleoside-diphosphate kinase)           | 0.8725 | 0.0001 |
| 205854_at   | TULP3    | tubby like protein 3                                                                   | 0.9966 | 0.0029 |
| 205855_at   | ZNF197   | zinc finger protein 197                                                                | 0.1804 | 0.0154 |
| 205860_x_at | FOLH1    | folate hydrolase (prostate-specific membrane antigen) 1                                | 1.2216 | 0.0031 |
| 205865_at   | ARID3A   | AT rich interactive domain 3A (BRIGHT-like)                                            | 0.4789 | 0.0248 |
| 205867_at   | PTPN11   | protein tyrosine phosphatase; non-receptor type 11 (Noonan syndrome 1)                 | 0.2472 | 0.0255 |
| 205881_at   | ZNF74    | zinc finger protein 74                                                                 | 0.3911 | 0.027  |
| 205882_x_at | ADD3     | adducin 3 (gamma)                                                                      | 0.6856 | 0.0273 |
| 205887_x_at | MSH3     | mutS homolog 3 (E. coli)                                                               | 0.2144 | 0.0332 |
| 205888_s_at | JAKMIP2  | janus kinase and microtubule interacting protein 2                                     | 2.0682 | 0      |
| 205889_s_at | JAKMIP2  | janus kinase and microtubule interacting protein 2                                     | 1.5124 | 0.0006 |
| 205904_at   | MICA     | MHC class I polypeptide-related sequence A                                             | 1.0424 | 0.0046 |
| 205905_s_at | MICA     | MHC class I polypeptide-related sequence A, MHC class I polypeptide-related sequence B | 1.5227 | 0.0025 |
| 205909_at   | POLE2    | polymerase (DNA directed); epsilon 2 (p59 subunit)                                     | 1.6303 | 0.0006 |
| 205917_at   | ZNF264   | zinc finger protein 264                                                                | 1.4159 | 0.0004 |
| 205928_at   | ZNF443   | zinc finger protein 443                                                                | 0.955  | 0.0031 |
| 205931_s_at | CREB5    | cAMP responsive element binding protein 5                                              | 0.6986 | 0.0089 |
| 205932_s_at | MSX1     | msh homeobox 1                                                                         | 1.4215 | 0.002  |
| 205942_s_at | ACSM3    | acyl-CoA synthetase medium-chain family member 3                                       | 1.726  | 0.0092 |
| 205956_x_at | PSMC3IP  | PSMC3 interacting protein                                                              | 0.3306 | 0.0079 |
| 205961_s_at | PSIP1    | PC4 and SFRS1 interacting protein 1                                                    | 0.8206 | 0.0164 |
| 205967_at   | HIST1H4C | histone cluster 1; H4c                                                                 | 0.3801 | 0.0324 |
| 205970_at   | MT3      | metallothionein 3                                                                      | 1.9411 | 0.0211 |
| 205990_s_at | WNT5A    | wingless-type MMTV integration site family; member 5A                                  | 1.911  | 0.0153 |
| 205995_x_at | IQCB1    | IQ motif containing B1                                                                 | 0.6416 | 0.0032 |
| 206003_at   | CEP135   | centrosomal protein 135kDa                                                             | 0.8325 | 0.0001 |
| 206015_s_at | FOXJ3    | forkhead box J3                                                                        | 0.3967 | 0.029  |
| 206016_at   | CCDC22   | coiled-coil domain containing 22                                                       | 0.5783 | 0.0375 |
| 206021_at   | SCAND2   | SCAN domain containing 2                                                               | 0.1643 | 0.0036 |
| 206022_at   | NDP      | Norrie disease (pseudoglioma)                                                          | 1.6475 | 0.013  |

|             |          |                                                                           |        |        |
|-------------|----------|---------------------------------------------------------------------------|--------|--------|
| 206031_s_at | USP5     | ubiquitin specific peptidase 5 (isopeptidase T)                           | 0.5917 | 0.0008 |
| 206038_s_at | NR2C2    | nuclear receptor subfamily 2; group C; member 2                           | 0.2347 | 0.0261 |
| 206044_s_at | BRAF     | v-ras murine sarcoma viral oncogene homolog B1                            | 0.3152 | 0.0365 |
| 206046_at   | ADAM23   | ADAM metallopeptidase domain 23                                           | 0.6219 | 0.0157 |
| 206052_s_at | SLBP     | stem-loop (histone) binding protein                                       | 0.5885 | 0.0012 |
| 206053_at   | ZNF510   | zinc finger protein 510                                                   | 0.8459 | 0.005  |
| 206061_s_at | DICER1   | Dicer1; Dcr-1 homolog (Drosophila)                                        | 1.4703 | 0      |
| 206070_s_at | EPHA3    | EPH receptor A3                                                           | 1.6549 | 0.0335 |
| 206075_s_at | CSNK2A1  | casein kinase 2; alpha 1 polypeptide                                      | 0.7599 | 0.0173 |
| 206079_at   | CHML     | choroideremia-like (Rab escort protein 2)                                 | 0.1861 | 0.0011 |
| 206088_at   | LRRC37A2 | leucine rich repeat containing 37; member A2                              | 0.5318 | 0.007  |
| 206091_at   | MATN3    | matrilin 3                                                                | 0.9557 | 0.0388 |
| 206098_at   | ZBTB6    | zinc finger and BTB domain containing 6                                   | 0.5472 | 0.0223 |
| 206102_at   | GINS1    | GINS complex subunit 1 (Psf1 homolog)                                     | 4.1945 | 0      |
| 206110_at   | HIST1H3H | histone cluster 1; H3h                                                    | 1.166  | 0.0293 |
| 206114_at   | EPHA4    | EPH receptor A4                                                           | 0.904  | 0.0414 |
| 206132_at   | MCC      | mutated in colorectal cancers                                             | 0.3617 | 0.0345 |
| 206135_at   | ST18     | suppression of tumorigenicity 18 (breast carcinoma) (zinc finger protein) | 0.221  | 0.0461 |
| 206140_at   | LHX2     | LIM homeobox 2                                                            | 1.0075 | 0.0316 |
| 206141_at   | MOCS3    | molybdenum cofactor synthesis 3                                           | 0.5593 | 0.023  |
| 206144_at   | MAGI1    | membrane associated guanylate kinase; WW and PDZ domain containing 1      | 0.6963 | 0.0077 |
| 206172_at   | IL13RA2  | interleukin 13 receptor; alpha 2                                          | 2.6241 | 0.0173 |
| 206188_at   |          |                                                                           | 1.0909 | 0.0005 |
| 206205_at   | MPHOSPH9 | M-phase phosphoprotein 9                                                  | 1.4314 | 0.0001 |
| 206217_at   | EDA      | ectodysplasin A                                                           | 0.7729 | 0.0137 |
| 206236_at   | GPR4     | G protein-coupled receptor 4                                              | 0.9441 | 0.0477 |
| 206240_s_at | ZNF136   | zinc finger protein 136                                                   | 1.205  | 0.0004 |
| 206245_s_at | IVNS1ABP | influenza virus NS1A binding protein                                      | 0.5825 | 0.0249 |
| 206247_at   | MICB     | MHC class I polypeptide-related sequence B                                | 1.6803 | 0.0172 |
| 206308_at   | TRDMT1   | tRNA aspartic acid methyltransferase 1                                    | 0.557  | 0.0044 |
| 206311_s_at | PLA2G1B  | phospholipase A2; group IB (pancreas)                                     | 2.9313 | 0.0005 |
| 206316_s_at | KNTC1    | kinetochore associated 1                                                  | 2.3598 | 0      |
| 206342_x_at | IDS      | iduronate 2-sulfatase (Hunter syndrome)                                   | 1.0383 | 0.0372 |
| 206347_at   | PDK3     | pyruvate dehydrogenase kinase; isozyme 3                                  | 0.1824 | 0.009  |
| 206348_s_at | PDK3     | pyruvate dehydrogenase kinase; isozyme 3                                  | 0.7734 | 0.0006 |

|             |           |                                                                                                           |        |        |
|-------------|-----------|-----------------------------------------------------------------------------------------------------------|--------|--------|
| 206364_at   | KIF14     | kinesin family member 14                                                                                  | 1.7557 | 0.0006 |
| 206367_at   | REN       | renin                                                                                                     | 1.8399 | 0.0424 |
| 206383_s_at | G3BP2     | GTPase activating protein (SH3 domain) binding protein 2                                                  | 0.827  | 0.0099 |
| 206445_s_at | PRMT1     | protein arginine methyltransferase 1                                                                      | 0.5617 | 0.0196 |
| 206463_s_at | DHRS2     | dehydrogenase/reductase (SDR family) member 2                                                             | 1.2874 | 0.0378 |
| 206467_x_at | RTEL1     | regulator of telomere elongation helicase 1, tumor necrosis factor receptor superfamily; member 6b; decoy | 0.5468 | 0.0023 |
| 206470_at   | PLXNC1    | plexin C1                                                                                                 | 1.513  | 0.0044 |
| 206471_s_at | PLXNC1    | plexin C1                                                                                                 | 1.7458 | 0.0005 |
| 206472_s_at | TLE3      | transducin-like enhancer of split 3 (E(sp1) homolog; Drosophila)                                          | 0.4841 | 0.0473 |
| 206474_at   | PCK2      | PCKAIRE protein kinase 2                                                                                  | 0.5006 | 0.0054 |
| 206487_at   | UNC84A    | unc-84 homolog A (C. elegans)                                                                             | 0.4157 | 0.0028 |
| 206488_s_at | CD36      | CD36 molecule (thrombospondin receptor)                                                                   | 2.7908 | 0.0001 |
| 206497_at   | C7orf44   | chromosome 7 open reading frame 44                                                                        | 0.3202 | 0.0039 |
| 206499_s_at | RCC1      | regulator of chromosome condensation 1                                                                    | 0.8653 | 0.0124 |
| 206500_s_at | C14orf106 | chromosome 14 open reading frame 106                                                                      | 0.7889 | 0.0021 |
| 206507_at   | ZSCAN12   | zinc finger and SCAN domain containing 12                                                                 | 0.7753 | 0.0003 |
| 206516_at   | AMH       | anti-Mullerian hormone                                                                                    | 0.3528 | 0.0478 |
| 206527_at   | ABAT      | 4-aminobutyrate aminotransferase                                                                          | 1.1191 | 0.0354 |
| 206533_at   | CHRNA5    | cholinergic receptor; nicotinic; alpha 5                                                                  | 0.4458 | 0.0165 |
| 206536_s_at | BIRC4     | baculoviral IAP repeat-containing 4                                                                       | 0.5119 | 0.0362 |
| 206550_s_at | NUP155    | nucleoporin 155kDa                                                                                        | 1.3479 | 0.0005 |
| 206551_x_at | KLHL24    | kelch-like 24 (Drosophila)                                                                                | 0.4853 | 0.0207 |
| 206555_s_at | THUMP1    | THUMP domain containing 1                                                                                 | 0.4956 | 0.0202 |
| 206562_s_at | CSNK1A1   | casein kinase 1; alpha 1                                                                                  | 0.4485 | 0.0151 |
| 206565_x_at | SMA4      | glucuronidase; beta pseudogene                                                                            | 0.4211 | 0.0121 |
| 206574_s_at | PTP4A3    | protein tyrosine phosphatase type IVA; member 3                                                           | 1.8072 | 0.0004 |
| 206579_at   | ZNF192    | zinc finger protein 192                                                                                   | 0.1903 | 0.0355 |
| 206591_at   | RAG1      | recombination activating gene 1                                                                           | 0.1655 | 0.0214 |
| 206592_s_at | AP3D1     | adaptor-related protein complex 3; delta 1 subunit                                                        | 0.3054 | 0.0082 |
| 206601_s_at | HOXD3     | homeobox D3                                                                                               | 1.071  | 0.0015 |
| 206613_s_at | TAF1A     | TATA box binding protein (TBP)-associated factor; RNA polymerase I; A; 48kDa                              | 0.8214 | 0.0168 |
| 206621_s_at | EIF4H     | eukaryotic translation initiation factor 4H                                                               | 0.2436 | 0.0248 |
| 206632_s_at | APOBEC3B  | apolipoprotein B mRNA editing enzyme; catalytic polypeptide-like 3B                                       | 4.4753 | 0      |
| 206652_at   | ZMYM5     | zinc finger; MYM-type 5                                                                                   | 0.6619 | 0.04   |

|             |          |                                                                                        |        |        |
|-------------|----------|----------------------------------------------------------------------------------------|--------|--------|
| 206656_s_at | C20orf3  | chromosome 20 open reading frame 3                                                     | 0.5321 | 0.0013 |
| 206659_at   | FLJ14082 | hypothetical protein FLJ14082                                                          | 0.4445 | 0.0118 |
| 206665_s_at | BCL2L1   | BCL2-like 1                                                                            | 0.601  | 0.0259 |
| 206667_s_at | SCAMP1   | secretory carrier membrane protein 1                                                   | 1.2299 | 0.0022 |
| 206668_s_at | SCAMP1   | secretory carrier membrane protein 1                                                   | 1.4722 | 0.0008 |
| 206669_at   | GAD1     | glutamate decarboxylase 1 (brain; 67kDa)                                               | 0.3603 | 0.0235 |
| 206670_s_at | GAD1     | glutamate decarboxylase 1 (brain; 67kDa)                                               | 0.5799 | 0.0158 |
| 206685_at   | HCG4     | HLA complex group 4                                                                    | 0.9122 | 0.0469 |
| 206688_s_at | CPSF4    | cleavage and polyadenylation specific factor 4; 30kDa                                  | 0.5252 | 0.0041 |
| 206695_x_at | ZNF43    | zinc finger protein 43                                                                 | 1.2894 | 0.0083 |
| 206704_at   | CLCN5    | chloride channel 5 (nephrolithiasis 2; X-linked; Dent disease)                         | 0.6751 | 0.0043 |
| 206752_s_at | DFFB     | DNA fragmentation factor; 40kDa; beta polypeptide (caspase-activated DNase)            | 0.4186 | 0.004  |
| 206765_at   | KCNJ2    | potassium inwardly-rectifying channel; subfamily J; member 2                           | 1.6005 | 0.0001 |
| 206788_s_at | CBFB     | core-binding factor; beta subunit                                                      | 1.1359 | 0.0143 |
| 206792_x_at | PDE4C    | phosphodiesterase 4C; cAMP-specific (phosphodiesterase E1 dunce homolog; Drosophila)   | 0.5307 | 0.0005 |
| 206822_s_at | L3MBTL   | l(3)mbt-like (Drosophila)                                                              | 0.3306 | 0.0034 |
| 206829_x_at | ZNF430   | zinc finger protein 430                                                                | 1.6279 | 0.0007 |
| 206832_s_at | SEMA3F   | sema domain; immunoglobulin domain (Ig); short basic domain; secreted; (semaphorin) 3F | 0.2094 | 0.0219 |
| 206845_s_at | RNF40    | ring finger protein 40                                                                 | 0.7979 | 0.0027 |
| 206854_s_at | MAP3K7   | mitogen-activated protein kinase kinase kinase 7                                       | 0.5107 | 0.0192 |
| 206860_s_at | FLJ20323 | hypothetical protein FLJ20323                                                          | 0.5287 | 0.0233 |
| 206875_s_at | SLK      | STE20-like kinase (yeast)                                                              | 0.5826 | 0.0069 |
| 206892_at   | AMHR2    | anti-Mullerian hormone receptor; type II                                               | 1.388  | 0.0196 |
| 206900_x_at | ZNF253   | zinc finger protein 253                                                                | 0.5054 | 0.0241 |
| 206918_s_at | CPNE1    | copine I                                                                               | 1.0328 | 0.0014 |
| 206942_s_at | PMCH     | pro-melanin-concentrating hormone                                                      | 0.2037 | 0.0459 |
| 206951_at   | HIST1H4E | histone cluster 1; H4e                                                                 | 0.2291 | 0.0332 |
| 206976_s_at | HSPH1    | heat shock 105kDa/110kDa protein 1                                                     | 0.5098 | 0.0193 |
| 207030_s_at | CSRP2    | cysteine and glycine-rich protein 2                                                    | 2.4939 | 0      |
| 207031_at   | NKX3-2   | NK3 homeobox 2                                                                         | 0.5092 | 0.0242 |
| 207034_s_at | GLI2     | GLI-Kruppel family member GLI2                                                         | 0.6141 | 0.0268 |
| 207039_at   | CDKN2A   | cyclin-dependent kinase inhibitor 2A (melanoma; p16; inhibits CDK4)                    | 1.8374 | 0.0003 |
| 207050_at   | CACNA2D1 | calcium channel; voltage-dependent; alpha 2/delta subunit 1                            | 0.4379 | 0.0057 |



|             |        |                                                                                |        |        |
|-------------|--------|--------------------------------------------------------------------------------|--------|--------|
| 207056_s_at | SLC4A8 | solute carrier family 4; sodium bicarbonate cotransporter; member 8            | 1.0812 | 0.0078 |
| 207068_at   | ZFP37  | zinc finger protein 37 homolog (mouse)                                         | 0.9324 | 0.0021 |
| 207078_at   | MED6   | mediator complex subunit 6                                                     | 1.5008 | 0.0002 |
| 207079_s_at | MED6   | mediator complex subunit 6                                                     | 0.8954 | 0.0034 |
| 207090_x_at | ZFP30  | zinc finger protein 30 homolog (mouse)                                         | 0.7024 | 0.0072 |
| 207091_at   | P2RX7  | purinergic receptor P2X; ligand-gated ion channel; 7                           | 0.3186 | 0.041  |
| 207099_s_at | CHM    | choroideremia (Rab escort protein 1)                                           | 0.4848 | 0.0439 |
| 207108_s_at | NIPBL  | Nipped-B homolog (Drosophila)                                                  | 1.209  | 0.0042 |
| 207120_at   | ZNF667 | zinc finger protein 667                                                        | 1.4287 | 0.0072 |
| 207121_s_at | MAPK6  | mitogen-activated protein kinase 6                                             | 0.9182 | 0.0002 |
| 207130_at   | ZMYND8 | zinc finger; MYND-type containing 8                                            | 1.0487 | 0.0001 |
| 207165_at   | HMMR   | hyaluronan-mediated motility receptor (RHAMM)                                  | 3.9849 | 0      |
| 207168_s_at | H2AFY  | H2A histone family; member Y                                                   | 0.4002 | 0.0002 |
| 207169_x_at | DDR1   | discoidin domain receptor family; member 1                                     | 0.9389 | 0.0043 |
| 207178_s_at | FRK    | fyn-related kinase                                                             | 0.51   | 0.019  |
| 207193_at   | AGRP   | agouti related protein homolog (mouse)                                         | 1.8185 | 0.0271 |
| 207219_at   | ZNF643 | zinc finger protein 643                                                        | 0.2655 | 0.0182 |
| 207223_s_at | ROD1   | ROD1 regulator of differentiation 1 (S. pombe)                                 | 0.4153 | 0.0067 |
| 207229_at   | KLRA1  | killer cell lectin-like receptor subfamily A; member 1                         | 0.2569 | 0.0012 |
| 207236_at   | ZNF345 | zinc finger protein 345                                                        | 0.2982 | 0.0103 |
| 207253_s_at | UBN1   | ubiquitin 1                                                                    | 0.4627 | 0.0004 |
| 207263_x_at | VEZT   | vezatin; adherens junctions transmembrane protein                              | 0.4152 | 0.0075 |
| 207265_s_at | KDEL3  | KDEL (Lys-Asp-Glu-Leu) endoplasmic reticulum protein retention receptor 3      | 0.9454 | 0.0262 |
| 207268_x_at | ABI2   | abl interactor 2                                                               | 0.8207 | 0.0107 |
| 207286_at   | CEP135 | centrosomal protein 135kDa                                                     | 0.2614 | 0.0013 |
| 207300_s_at | F7     | coagulation factor VII (serum prothrombin conversion accelerator)              | 0.2385 | 0.0164 |
| 207304_at   | ZNF45  | zinc finger protein 45                                                         | 0.6029 | 0.0083 |
| 207318_s_at | CDC2L5 | cell division cycle 2-like 5 (cholinesterase-related cell division controller) | 0.6044 | 0.0005 |
| 207319_s_at | CDC2L5 | cell division cycle 2-like 5 (cholinesterase-related cell division controller) | 0.6837 | 0.0043 |
| 207331_at   |        |                                                                                | 0.1567 | 0.02   |
| 207338_s_at | ZNF200 | zinc finger protein 200                                                        | 0.7684 | 0.001  |
| 207346_at   | STX2   | syntaxin 2                                                                     | 0.4362 | 0.001  |

|             |          |                                                                                                  |        |        |
|-------------|----------|--------------------------------------------------------------------------------------------------|--------|--------|
| 207347_at   | ERCC6    | excision repair cross-complementing rodent repair deficiency; complementation group 6            | 0.1994 | 0.0159 |
| 207357_s_at | GALNT10  | UDP-N-acetyl-alpha-D-galactosamine:polypeptide N-acetylgalactosaminyltransferase 10 (GalNAc-T10) | 1.017  | 0.0363 |
| 207365_x_at | USP34    | ubiquitin specific peptidase 34                                                                  | 0.7845 | 0.0029 |
| 207373_at   | HOXD10   | homeobox D10                                                                                     | 0.5378 | 0.0288 |
| 207393_at   | HCRTR2   | hypocretin (orexin) receptor 2                                                                   | 1.4307 | 0.0238 |
| 207394_at   | ZNF137   | zinc finger protein 137                                                                          | 0.6914 | 0.0013 |
| 207405_s_at | RAD17    | RAD17 homolog (S. pombe)                                                                         | 0.4411 | 0.0046 |
| 207414_s_at | PCSK6    | proprotein convertase subtilisin/kexin type 6                                                    | 2.6994 | 0.0026 |
| 207417_s_at | ZNF177   | zinc finger protein 177                                                                          | 1.3185 | 0.0001 |
| 207437_at   | NOVA1    | neuro-oncological ventral antigen 1                                                              | 0.6605 | 0.0301 |
| 207439_s_at | SLC35A2  | solute carrier family 35 (UDP-galactose transporter); member A2                                  | 0.5862 | 0.0379 |
| 207467_x_at | CAST     | calpastatin                                                                                      | 0.4681 | 0.0086 |
| 207483_s_at | CAND1    | cullin-associated and neddylation-dissociated 1                                                  | 0.5436 | 0.0065 |
| 207489_at   | FLJ12331 | ribosomal protein S2 pseudogene                                                                  | 0.1115 | 0.0229 |
| 207499_x_at | UNC45A   | unc-45 homolog A (C. elegans)                                                                    | 0.378  | 0      |
| 207522_s_at | ATP2A3   | ATPase; Ca <sup>++</sup> transporting; ubiquitous                                                | 1.412  | 0.0313 |
| 207525_s_at | GIPC1    | GIPC PDZ domain containing family; member 1                                                      | 0.6095 | 0.0001 |
| 207543_s_at | P4HA1    | procollagen-proline; 2-oxoglutarate 4-dioxygenase (proline 4-hydroxylase); alpha polypeptide I   | 0.8915 | 0.0021 |
| 207559_s_at | ZMYM3    | zinc finger; MYM-type 3                                                                          | 0.7358 | 0.0075 |
| 207561_s_at | ACCN3    | amiloride-sensitive cation channel 3                                                             | 0.2813 | 0.0031 |
| 207583_at   | ABCD2    | ATP-binding cassette; sub-family D (ALD); member 2                                               | 0.3391 | 0.0227 |
| 207590_s_at | CENPI    | centromere protein I                                                                             | 0.6038 | 0.0052 |
| 207594_s_at | SYNJ1    | synaptojanin 1                                                                                   | 0.3579 | 0.0038 |
| 207598_x_at | XRCC2    | X-ray repair complementing defective repair in Chinese hamster cells 2                           | 0.5061 | 0.0017 |
| 207605_x_at | ZNF117   | zinc finger protein 117                                                                          | 0.8859 | 0.0488 |
| 207606_s_at | ARHGAP12 | Rho GTPase activating protein 12                                                                 | 0.8581 | 0.0069 |
| 207614_s_at | CUL1     | cullin 1                                                                                         | 0.8588 | 0.0001 |
| 207620_s_at | CASK     | calcium/calmodulin-dependent serine protein kinase (MAGUK family)                                | 1.2101 | 0.0003 |
| 207625_s_at | CBFA2T2  | core-binding factor; runt domain; alpha subunit 2; translocated to; 2                            | 0.5756 | 0.0098 |
| 207627_s_at | TFCP2    | transcription factor CP2                                                                         | 1.2351 | 0.0011 |
| 207628_s_at | WBSCR22  | Williams Beuren syndrome chromosome region 22                                                    | 0.5013 | 0.0088 |
| 207657_x_at | TNPO1    | transportin 1                                                                                    | 0.9273 | 0      |

|             |             |                                                                                                     |        |        |
|-------------|-------------|-----------------------------------------------------------------------------------------------------|--------|--------|
| 207686_s_at | CASP8       | caspase 8; apoptosis-related cysteine peptidase                                                     | 0.4998 | 0.0231 |
| 207702_s_at | MAGI2       | membrane associated guanylate kinase; WW and PDZ domain containing 2                                | 0.9652 | 0.0167 |
| 207714_s_at | SERPINH1    | serpin peptidase inhibitor; clade H (heat shock protein 47); member 1; (collagen binding protein 1) | 1.1936 | 0.0005 |
| 207728_at   | ATF7IP      | activating transcription factor 7 interacting protein                                               | 0.446  | 0.0008 |
| 207730_x_at |             |                                                                                                     | 0.4019 | 0.0083 |
| 207740_s_at | NUP62       | nucleoporin 62kDa                                                                                   | 0.9616 | 0.0034 |
| 207746_at   | POLQ        | polymerase (DNA directed); theta                                                                    | 0.9717 | 0.0005 |
| 207797_s_at | LRP2BP      | LRP2 binding protein                                                                                | 0.8472 | 0.0056 |
| 207809_s_at | ATP6AP1     | ATPase; H+ transporting; lysosomal accessory protein 1                                              | 0.7069 | 0.0004 |
| 207822_at   | FGFR1       | fibroblast growth factor receptor 1 (fms-related tyrosine kinase 2; Pfeiffer syndrome)              | 0.4678 | 0.0103 |
| 207824_s_at | MAZ         | MYC-associated zinc finger protein (purine-binding transcription factor)                            | 0.8157 | 0.0004 |
| 207828_s_at | CENPF       | centromere protein F; 350/400ka (mitosin)                                                           | 3.1324 | 0      |
| 207833_s_at | HLCS        | holocarboxylase synthetase (biotin-(proprionyl-Coenzyme A-carboxylase (ATP-hydrolysing)) ligase)    | 0.5775 | 0.0121 |
| 207839_s_at | C9orf127    | chromosome 9 open reading frame 127                                                                 | 0.6293 | 0.0461 |
| 207856_s_at | FLJ41352    | FLJ41352 protein, sphingomyelin phosphodiesterase 4; neutral membrane (neutral sphingomyelinase-3)  | 0.6719 | 0.0027 |
| 207877_s_at | NVL         | nuclear VCP-like                                                                                    | 0.5685 | 0.0415 |
| 207879_at   |             |                                                                                                     | 0.1205 | 0.0309 |
| 207891_s_at | TREX2       | UHL5 interacting protein, three prime repair exonuclease 2                                          | 0.9958 | 0.0034 |
| 207904_s_at | LNPEP       | leucyl/cystinyl aminopeptidase                                                                      | 0.3094 | 0.0122 |
| 207937_x_at | FGFR1       | fibroblast growth factor receptor 1 (fms-related tyrosine kinase 2; Pfeiffer syndrome)              | 0.3963 | 0.0175 |
| 207939_x_at | RNPS1       | RNA binding protein S1; serine-rich domain                                                          | 0.3335 | 0.0096 |
| 207941_s_at | RBM39       | RNA binding motif protein 39                                                                        | 0.3549 | 0.0018 |
| 207953_at   | RP5-886K2.1 | neuronal thread protein AD7c-NTP                                                                    | 0.2343 | 0.0284 |
| 207966_s_at | GLG1        | golgi apparatus protein 1                                                                           | 0.8849 | 0      |
| 207971_s_at | CEP68       | centrosomal protein 68kDa                                                                           | 0.379  | 0.0021 |
| 207983_s_at | STAG2       | stromal antigen 2                                                                                   | 0.677  | 0.0214 |
| 207987_s_at | GNRH1       | gonadotropin-releasing hormone 1 (luteinizing-releasing hormone)                                    | 0.1954 | 0.0195 |
| 208002_s_at | ACOT7       | acyl-CoA thioesterase 7                                                                             | 1.5912 | 0.0021 |
| 208015_at   | SMAD1       | SMAD family member 1                                                                                | 0.6852 | 0.001  |
| 208025_s_at | HMGA2       | high mobility group AT-hook 2                                                                       | 2.2416 | 0.0083 |
| 208042_at   | AGGF1       | angiogenic factor with G patch and FHA domains 1                                                    | 0.6315 | 0.0025 |

|             |           |                                                                                                                                                                                                                                                                                         |        |        |
|-------------|-----------|-----------------------------------------------------------------------------------------------------------------------------------------------------------------------------------------------------------------------------------------------------------------------------------------|--------|--------|
| 208050_s_at | CASP2     | caspase 2; apoptosis-related cysteine peptidase (neural precursor cell expressed; developmentally down-regulated 2)                                                                                                                                                                     | 0.3739 | 0.012  |
| 208051_s_at | PAIP1     | poly(A) binding protein interacting protein 1                                                                                                                                                                                                                                           | 0.6135 | 0.0046 |
| 208074_s_at | AP2S1     | adaptor-related protein complex 2; sigma 1 subunit                                                                                                                                                                                                                                      | 0.3527 | 0.0245 |
| 208079_s_at | AURKA     | aurora kinase A                                                                                                                                                                                                                                                                         | 3.0726 | 0      |
| 208082_x_at |           |                                                                                                                                                                                                                                                                                         | 0.2455 | 0.0034 |
| 208107_s_at | LOC81691  | exonuclease NEF-sp                                                                                                                                                                                                                                                                      | 1.2799 | 0.0002 |
| 208113_x_at | PABPC3    | poly(A) binding protein; cytoplasmic 3                                                                                                                                                                                                                                                  | 0.1846 | 0.0287 |
| 208118_x_at | IMAA      | PI-3-kinase-related kinase SMG-1 - like locus, PI-3-kinase-related kinase SMG-1 pseudogene, SLC7A5 pseudogene, hypothetical protein LOC440345, similar to PI-3-kinase-related kinase SMG-1, solute carrier family 7 (cationic amino acid transporter; y+ system); member 5 pseudogene 1 | 0.4798 | 0.0039 |
| 208119_s_at | ZNF93     | zinc finger protein 93                                                                                                                                                                                                                                                                  | 1.2516 | 0.0039 |
| 208120_x_at | FKSG49    | FKSG49, hypothetical protein LOC730444                                                                                                                                                                                                                                                  | 0.7436 | 0      |
| 208137_x_at | LOC731901 | similar to zinc finger protein 160, zinc finger protein 137, zinc finger protein 600, zinc finger protein 611                                                                                                                                                                           | 0.793  | 0      |
| 208144_s_at |           |                                                                                                                                                                                                                                                                                         | 0.1591 | 0.0422 |
| 208149_x_at | DDX11     | DEAD/H (Asp-Glu-Ala-Asp/His) box polypeptide 11 (CHL1-like helicase homolog; <i>S. cerevisiae</i> )                                                                                                                                                                                     | 1.1426 | 0.0003 |
| 208159_x_at | DDX11     | DEAD/H (Asp-Glu-Ala-Asp/His) box polypeptide 11 (CHL1-like helicase homolog; <i>S. cerevisiae</i> )                                                                                                                                                                                     | 0.779  | 0.0011 |
| 208174_x_at | ZRSR2     | zinc finger (CCCH type); RNA-binding motif and serine/arginine rich 2                                                                                                                                                                                                                   | 0.8318 | 0.0238 |
| 208184_s_at | TMEM1     | transmembrane protein 1                                                                                                                                                                                                                                                                 | 0.3798 | 0.0413 |
| 208200_at   | IL1A      | interleukin 1; alpha                                                                                                                                                                                                                                                                    | 0.598  | 0.0013 |
| 208238_x_at |           |                                                                                                                                                                                                                                                                                         | 0.2741 | 0.003  |
| 208246_x_at |           | CDNA FLJ20006 fis; clone ADKA02694                                                                                                                                                                                                                                                      | 0.3477 | 0.0076 |
| 208308_s_at | GPI       | glucose phosphate isomerase                                                                                                                                                                                                                                                             | 0.5865 | 0.0009 |
| 208309_s_at | MALT1     | mucosa associated lymphoid tissue lymphoma translocation gene 1                                                                                                                                                                                                                         | 0.4591 | 0.0209 |
| 208336_s_at | GPSN2     | glycoprotein; synaptic 2                                                                                                                                                                                                                                                                | 0.463  | 0.0289 |
| 208363_s_at | INPP4A    | inositol polyphosphate-4-phosphatase; type I; 107kDa                                                                                                                                                                                                                                    | 0.2886 | 0.0317 |
| 208368_s_at | BRCA2     | breast cancer 2; early onset                                                                                                                                                                                                                                                            | 1.3495 | 0.0003 |
| 208393_s_at | RAD50     | RAD50 homolog ( <i>S. cerevisiae</i> )                                                                                                                                                                                                                                                  | 0.8054 | 0.007  |
| 208394_x_at | ESM1      | endothelial cell-specific molecule 1                                                                                                                                                                                                                                                    | 1.9764 | 0      |
| 208424_s_at | CIAPIN1   | cytokine induced apoptosis inhibitor 1                                                                                                                                                                                                                                                  | 0.7018 | 0.0078 |
| 208425_s_at | TANC2     | tetratricopeptide repeat; ankyrin repeat and coiled-coil containing 2                                                                                                                                                                                                                   | 0.2783 | 0.0053 |

|             |           |                                                                                         |        |        |
|-------------|-----------|-----------------------------------------------------------------------------------------|--------|--------|
| 208445_s_at | BAZ1B     | bromodomain adjacent to zinc finger domain; 1B                                          | 0.6775 | 0.0007 |
| 208447_s_at | PRPS1     | phosphoribosyl pyrophosphate synthetase 1                                               | 1.4305 | 0.0043 |
| 208453_s_at | XPNPEP1   | X-prolyl aminopeptidase (aminopeptidase P) 1; soluble                                   | 1.0646 | 0.0009 |
| 208459_s_at | XPO7      | exportin 7                                                                              | 1.2565 | 0.0029 |
| 208478_s_at | BAX       | BCL2-associated X protein                                                               | 1.0448 | 0.0007 |
| 208490_x_at | HIST1H2BF | histone cluster 1; H2bf                                                                 | 0.7929 | 0.0462 |
| 208493_at   | HOXA11    | homeobox A11                                                                            | 0.2552 | 0.0169 |
| 208502_s_at | PITX1     | paired-like homeodomain 1                                                               | 0.7769 | 0.0296 |
| 208503_s_at | GATAD1    | GATA zinc finger domain containing 1                                                    | 1.0175 | 0.0004 |
| 208511_at   | PTTG3     | pituitary tumor-transforming 3                                                          | 0.6873 | 0.0001 |
| 208546_x_at | HIST1H2BH | histone cluster 1; H2bh                                                                 | 1.1216 | 0.0227 |
| 208640_at   | RAC1      | ras-related C3 botulinum toxin substrate 1 (rho family; small GTP binding protein Rac1) | 0.2109 | 0.0007 |
| 208641_s_at | RAC1      | ras-related C3 botulinum toxin substrate 1 (rho family; small GTP binding protein Rac1) | 0.1909 | 0.0169 |
| 208653_s_at | CD164     | CD164 molecule; sialomucin                                                              | 0.7577 | 0.0487 |
| 208658_at   | PDIA4     | protein disulfide isomerase family A; member 4                                          | 0.6219 | 0.0302 |
| 208660_at   | CS        | citrate synthase                                                                        | 0.3553 | 0.0139 |
| 208676_s_at | PA2G4     | proliferation-associated 2G4; 38kDa                                                     | 0.3652 | 0.0136 |
| 208682_s_at | MAGED2    | melanoma antigen family D; 2                                                            | 1.3688 | 0.0011 |
| 208688_x_at | EIF3B     | eukaryotic translation initiation factor 3; subunit B                                   | 0.4003 | 0.0113 |
| 208689_s_at | RPN2      | ribophorin II                                                                           | 0.3515 | 0.0057 |
| 208693_s_at | GARS      | glycyl-tRNA synthetase                                                                  | 0.9392 | 0      |
| 208698_s_at | NONO      | non-POU domain containing; octamer-binding                                              | 0.6687 | 0.0316 |
| 208702_x_at | APLP2     | amyloid beta (A4) precursor-like protein 2                                              | 0.9016 | 0.0034 |
| 208709_s_at | NRD1      | nardilysin (N-arginine dibasic convertase)                                              | 0.2614 | 0.0493 |
| 208710_s_at | AP3D1     | adaptor-related protein complex 3; delta 1 subunit                                      | 1.0408 | 0.0122 |
| 208720_s_at | RBM39     | RNA binding motif protein 39                                                            | 0.3291 | 0.0053 |
| 208721_s_at | ANAPC5    | anaphase promoting complex subunit 5                                                    | 0.9254 | 0.0202 |
| 208722_s_at | ANAPC5    | anaphase promoting complex subunit 5                                                    | 0.4969 | 0.001  |
| 208723_at   | USP11     | ubiquitin specific peptidase 11                                                         | 1.0756 | 0.0001 |
| 208725_at   | EIF2S2    | eukaryotic translation initiation factor 2; subunit 2 beta; 38kDa                       | 0.686  | 0.016  |
| 208726_s_at | EIF2S2    | eukaryotic translation initiation factor 2; subunit 2 beta; 38kDa                       | 0.3891 | 0.0324 |
| 208744_x_at | HSPH1     | heat shock 105kDa/110kDa protein 1                                                      | 1.1719 | 0.0081 |
| 208757_at   | TMED9     | transmembrane emp24 protein transport domain containing 9                               | 0.5098 | 0.0263 |

|             |           |                                                                                                                       |        |        |
|-------------|-----------|-----------------------------------------------------------------------------------------------------------------------|--------|--------|
| 208772_at   | ANKHD1    | MASK-4E-BP3 alternate reading frame gene, ankyrin repeat and KH domain containing 1                                   | 0.4638 | 0.0348 |
| 208773_s_at | ANKHD1    | MASK-4E-BP3 alternate reading frame gene, ankyrin repeat and KH domain containing 1                                   | 0.3347 | 0.0393 |
| 208775_at   | XPO1      | exportin 1 (CRM1 homolog; yeast)                                                                                      | 0.6359 | 0      |
| 208777_s_at | PSMD11    | proteasome (prosome; macropain) 26S subunit; non-ATPase; 11                                                           | 0.5497 | 0.0189 |
| 208779_x_at | DDR1      | discoidin domain receptor family; member 1                                                                            | 0.8032 | 0.007  |
| 208795_s_at | MCM7      | minichromosome maintenance complex component 7                                                                        | 1.325  | 0.0005 |
| 208796_s_at | CCNG1     | cyclin G1                                                                                                             | 0.4175 | 0.0355 |
| 208797_s_at | GOLGA8B   | golgi autoantigen; golgin subfamily a; 8B                                                                             | 0.4142 | 0.0082 |
| 208798_x_at | GOLGA8A   | golgi autoantigen; golgin subfamily a; 8A                                                                             | 0.8257 | 0.0213 |
| 208808_s_at | HMGB2     | high-mobility group box 2                                                                                             | 1.4362 | 0      |
| 208815_x_at | HSPA4     | heat shock 70kDa protein 4                                                                                            | 0.5553 | 0.0098 |
| 208819_at   | RAB8A     | RAB8A; member RAS oncogene family                                                                                     | 0.6084 | 0.0007 |
| 208821_at   | SNRNPB    | small nuclear ribonucleoprotein polypeptides B and B1                                                                 | 0.6985 | 0.0006 |
| 208823_s_at | PCK1      | PCKAIRE protein kinase 1                                                                                              | 0.599  | 0.0054 |
| 208837_at   | TMED3     | transmembrane emp24 protein transport domain containing 3                                                             | 1.4621 | 0      |
| 208838_at   | CAND1     | cullin-associated and neddylation-dissociated 1                                                                       | 0.8113 | 0.0045 |
| 208839_s_at | CAND1     | cullin-associated and neddylation-dissociated 1                                                                       | 1.0363 | 0      |
| 208840_s_at | G3BP2     | GTPase activating protein (SH3 domain) binding protein 2                                                              | 0.6208 | 0.0323 |
| 208845_at   | VDAC3     | voltage-dependent anion channel 3                                                                                     | 0.1869 | 0.0313 |
| 208846_s_at | VDAC3     | voltage-dependent anion channel 3                                                                                     | 0.4342 | 0.0216 |
| 208850_s_at | THY1      | Thy-1 cell surface antigen                                                                                            | 1.6165 | 0.0013 |
| 208851_s_at | THY1      | Thy-1 cell surface antigen                                                                                            | 1.0012 | 0.0122 |
| 208853_s_at | CANX      | calnexin                                                                                                              | 0.9664 | 0.027  |
| 208879_x_at | PRPF6     | PRP6 pre-mRNA processing factor 6 homolog (S. cerevisiae)                                                             | 0.4961 | 0.0451 |
| 208882_s_at | UBR5      | ubiquitin protein ligase E3 component n-recognin 5                                                                    | 1.19   | 0      |
| 208883_at   | UBR5      | ubiquitin protein ligase E3 component n-recognin 5                                                                    | 0.9977 | 0.0012 |
| 208884_s_at | LOC730429 | similar to E3 ubiquitin protein ligase; HECT domain containing; 1, ubiquitin protein ligase E3 component n-recognin 5 | 0.8802 | 0.0001 |
| 208913_at   | GGA2      | golgi associated; gamma adaptin ear containing; ARF binding protein 2                                                 | 0.6822 | 0.0012 |
| 208914_at   | GGA2      | golgi associated; gamma adaptin ear containing; ARF binding protein 2                                                 | 0.9111 | 0.0051 |
| 208915_s_at | GGA2      | golgi associated; gamma adaptin ear containing; ARF binding protein 2                                                 | 1.2808 | 0.0004 |

|             |           |                                                                          |        |        |
|-------------|-----------|--------------------------------------------------------------------------|--------|--------|
| 208926_at   | NEU1      | sialidase 1 (lysosomal sialidase)                                        | 0.884  | 0.0052 |
| 208930_s_at | ILF3      | interleukin enhancer binding factor 3; 90kDa                             | 1.4695 | 0      |
| 208931_s_at | ILF3      | interleukin enhancer binding factor 3; 90kDa                             | 0.6195 | 0.0238 |
| 208932_at   | PPP4C     | protein phosphatase 4 (formerly X); catalytic subunit                    | 0.9434 | 0.0001 |
| 208947_s_at | UPF1      | UPF1 regulator of nonsense transcripts homolog (yeast)                   | 0.4981 | 0.0081 |
| 208957_at   | TXNDC4    | thioredoxin domain containing 4 (endoplasmic reticulum)                  | 0.8893 | 0.011  |
| 208974_x_at | KPNB1     | karyopherin (importin) beta 1                                            | 0.5198 | 0.001  |
| 208979_at   | NCOA6     | nuclear receptor coactivator 6                                           | 1.2867 | 0      |
| 208980_s_at | UBC       | ubiquitin C                                                              | 0.3704 | 0.0002 |
| 208983_s_at | PECAM1    | platelet/endothelial cell adhesion molecule (CD31 antigen)               | 0.9788 | 0.0169 |
| 208986_at   | TCF12     | transcription factor 12 (HTF4; helix-loop-helix transcription factors 4) | 0.3106 | 0.0086 |
| 208999_at   | 8-Sep     | septin 8                                                                 | 1.175  | 0.0002 |
| 209000_s_at | 8-Sep     | septin 8                                                                 | 0.7919 | 0.0121 |
| 209012_at   | TRIO      | triple functional domain (PTPRF interacting)                             | 0.3965 | 0.0464 |
| 209020_at   | C20orf111 | chromosome 20 open reading frame 111                                     | 0.6735 | 0.0056 |
| 209027_s_at | ABI1      | abl-interactor 1                                                         | 0.5583 | 0.0171 |
| 209032_s_at | CADM1     | cell adhesion molecule 1                                                 | 1.1941 | 0.0398 |
| 209041_s_at | UBE2G2    | ubiquitin-conjugating enzyme E2G 2 (UBC7 homolog; yeast)                 | 0.7594 | 0.0183 |
| 209043_at   | PAPSS1    | 3'-phosphoadenosine 5'-phosphosulfate synthase 1                         | 0.8242 | 0.0098 |
| 209045_at   | XPNPEP1   | X-prolyl aminopeptidase (aminopeptidase P) 1; soluble                    | 0.3984 | 0.0049 |
| 209048_s_at | ZMYND8    | zinc finger; MYND-type containing 8                                      | 1.023  | 0.0004 |
| 209049_s_at | ZMYND8    | zinc finger; MYND-type containing 8                                      | 0.6053 | 0.004  |
| 209052_s_at | WHSC1     | Wolf-Hirschhorn syndrome candidate 1                                     | 0.4835 | 0.0202 |
| 209053_s_at | WHSC1     | Wolf-Hirschhorn syndrome candidate 1                                     | 1.2939 | 0.001  |
| 209054_s_at | WHSC1     | Wolf-Hirschhorn syndrome candidate 1                                     | 0.822  | 0.0014 |
| 209060_x_at | NCOA3     | nuclear receptor coactivator 3                                           | 1.0138 | 0.0048 |
| 209062_x_at | NCOA3     | nuclear receptor coactivator 3                                           | 0.3178 | 0.0322 |
| 209064_x_at | PAIP1     | poly(A) binding protein interacting protein 1                            | 0.6012 | 0.0103 |
| 209068_at   | HNRPDL    | heterogeneous nuclear ribonucleoprotein D-like                           | 0.9067 | 0.0076 |
| 209088_s_at | UBN1      | ubinnuclein 1                                                            | 0.8723 | 0.002  |
| 209098_s_at | JAG1      | jagged 1 (Alagille syndrome)                                             | 2.8434 | 0.0003 |
| 209099_x_at | JAG1      | jagged 1 (Alagille syndrome)                                             | 1.7204 | 0.0001 |
| 209113_s_at | HMG20B    | high-mobility group 20B                                                  | 0.6109 | 0.0093 |
| 209118_s_at | TUBA1A    | tubulin; alpha 1a                                                        | 0.5177 | 0.0095 |
| 209127_s_at | SART3     | squamous cell carcinoma antigen recognized by T cells 3                  | 1.5973 | 0.0002 |

|             |          |                                                                              |        |        |
|-------------|----------|------------------------------------------------------------------------------|--------|--------|
| 209128_s_at | SART3    | squamous cell carcinoma antigen recognized by T cells 3                      | 0.4899 | 0      |
| 209136_s_at | USP10    | ubiquitin specific peptidase 10                                              | 1.3208 | 0.003  |
| 209137_s_at | USP10    | ubiquitin specific peptidase 10                                              | 0.5537 | 0.0013 |
| 209144_s_at | CBFA2T2  | core-binding factor; runt domain; alpha subunit 2; translocated to; 2        | 0.2456 | 0.0325 |
| 209145_s_at | CBFA2T2  | core-binding factor; runt domain; alpha subunit 2; translocated to; 2        | 0.3662 | 0.0002 |
| 209152_s_at | TCF3     | transcription factor 3 (E2A immunoglobulin enhancer binding factors E12/E47) | 0.85   | 0.0028 |
| 209153_s_at | TCF3     | transcription factor 3 (E2A immunoglobulin enhancer binding factors E12/E47) | 1.2758 | 0.0016 |
| 209172_s_at | CENPF    | centromere protein F; 350/400ka (mitosin)                                    | 1.349  | 0.0002 |
| 209178_at   | DHX38    | DEAH (Asp-Glu-Ala-His) box polypeptide 38                                    | 0.5037 | 0.0185 |
| 209190_s_at | DIAPH1   | diaphanous homolog 1 (Drosophila)                                            | 0.7299 | 0.0061 |
| 209203_s_at | BICD2    | bicaudal D homolog 2 (Drosophila)                                            | 0.6981 | 0.0451 |
| 209222_s_at | OSBPL2   | oxysterol binding protein-like 2                                             | 0.8948 | 0      |
| 209225_x_at | TNPO1    | transportin 1                                                                | 0.7974 | 0      |
| 209226_s_at | TNPO1    | transportin 1                                                                | 0.8935 | 0      |
| 209231_s_at | DCTN5    | dynactin 5 (p25)                                                             | 1.1364 | 0.0015 |
| 209232_s_at | DCTN5    | dynactin 5 (p25)                                                             | 0.7312 | 0.0003 |
| 209251_x_at | TUBA1C   | tubulin; alpha 1c                                                            | 0.5492 | 0      |
| 209254_at   | KIAA0265 | KIAA0265 protein                                                             | 0.6167 | 0.0215 |
| 209257_s_at | SMC3     | structural maintenance of chromosomes 3                                      | 1.9967 | 0.0005 |
| 209258_s_at | SMC3     | structural maintenance of chromosomes 3                                      | 1.3704 | 0.0007 |
| 209259_s_at | SMC3     | structural maintenance of chromosomes 3                                      | 0.5546 | 0.0232 |
| 209262_s_at | NR2F6    | nuclear receptor subfamily 2; group F; member 6                              | 1.0015 | 0.0001 |
| 209267_s_at | SLC39A8  | solute carrier family 39 (zinc transporter); member 8                        | 2.4313 | 0      |
| 209281_s_at | ATP2B1   | ATPase; Ca <sup>++</sup> transporting; plasma membrane 1                     | 1.4286 | 0.0001 |
| 209282_at   | PRKD2    | protein kinase D2                                                            | 0.7985 | 0.0003 |
| 209284_s_at | C3orf63  | chromosome 3 open reading frame 63                                           | 0.7664 | 0.0041 |
| 209338_at   | TFCP2    | transcription factor CP2                                                     | 0.7719 | 0.0076 |
| 209344_at   | TPM4     | tropomyosin 4                                                                | 0.8073 | 0.0127 |
| 209349_at   | RAD50    | RAD50 homolog (S. cerevisiae)                                                | 1.0898 | 0.0009 |
| 209367_at   | STXBP2   | syntaxin binding protein 2                                                   | 0.8778 | 0.0374 |
| 209376_x_at | SFRS2IP  | splicing factor; arginine/serine-rich 2; interacting protein                 | 0.8635 | 0.0057 |
| 209380_s_at | ABCC5    | ATP-binding cassette; sub-family C (CFTR/MRP); member 5                      | 1.1468 | 0.0001 |
| 209381_x_at | SF3A2    | splicing factor 3a; subunit 2; 66kDa                                         | 0.4788 | 0.0172 |
| 209383_at   | DDIT3    | DNA-damage-inducible transcript 3                                            | 1.2062 | 0.0045 |



|             |         |                                                                                                   |        |        |
|-------------|---------|---------------------------------------------------------------------------------------------------|--------|--------|
| 209391_at   | DPM2    | dolichyl-phosphate mannosyltransferase polypeptide 2; regulatory subunit                          | 0.8454 | 0.0017 |
| 209404_s_at | TMED7   | transmembrane emp24 protein transport domain containing 7                                         | 0.2659 | 0.0483 |
| 209408_at   | KIF2C   | kinesin family member 2C                                                                          | 2.1291 | 0.0014 |
| 209412_at   | TMEM1   | transmembrane protein 1                                                                           | 0.4018 | 0.0201 |
| 209440_at   | PRPS1   | phosphoribosyl pyrophosphate synthetase 1                                                         | 0.6433 | 0.016  |
| 209446_s_at | C7orf44 | chromosome 7 open reading frame 44                                                                | 2.6235 | 0      |
| 209456_s_at | FBXW11  | F-box and WD repeat domain containing 11                                                          | 0.7647 | 0.0103 |
| 209461_x_at | WDR18   | WD repeat domain 18                                                                               | 1.3264 | 0.0047 |
| 209464_at   | AURKB   | aurora kinase B                                                                                   | 1.0702 | 0.0055 |
| 209471_s_at | FNTA    | farnesyltransferase; CAAX box; alpha                                                              | 0.5167 | 0.0161 |
| 209482_at   | POP7    | processing of precursor 7; ribonuclease P/MRP subunit ( <i>S. cerevisiae</i> )                    | 0.726  | 0.0002 |
| 209495_at   | CEP250  | centrosomal protein 250kDa                                                                        | 0.4692 | 0.0016 |
| 209507_at   | RPA3    | replication protein A3; 14kDa                                                                     | 0.6662 | 0.0055 |
| 209518_at   | SMARCD1 | SWI/SNF related; matrix associated; actin dependent regulator of chromatin; subfamily d; member 1 | 0.3311 | 0.0418 |
| 209519_at   | NCBP1   | nuclear cap binding protein subunit 1; 80kDa                                                      | 0.5772 | 0.0019 |
| 209520_s_at | NCBP1   | nuclear cap binding protein subunit 1; 80kDa                                                      | 0.9141 | 0.0174 |
| 209527_at   | EXOSC2  | exosome component 2                                                                               | 0.6621 | 0.0069 |
| 209528_s_at | TELO2   | TEL2; telomere maintenance 2; homolog ( <i>S. cerevisiae</i> )                                    | 0.398  | 0.0235 |
| 209535_s_at |         |                                                                                                   | 0.4468 | 0.0225 |
| 209545_s_at | RIPK2   | receptor-interacting serine-threonine kinase 2                                                    | 0.7494 | 0.015  |
| 209547_s_at | SF4     | splicing factor 4                                                                                 | 0.2946 | 0.0076 |
| 209555_s_at | CD36    | CD36 molecule (thrombospondin receptor)                                                           | 2.7987 | 0.0008 |
| 209565_at   | RNF113A | ring finger protein 113A                                                                          | 0.8899 | 0.0027 |
| 209566_at   | INSIG2  | insulin induced gene 2                                                                            | 1.2855 | 0.0019 |
| 209572_s_at | EED     | embryonic ectoderm development                                                                    | 0.8433 | 0.0022 |
| 209575_at   | IL10RB  | interleukin 10 receptor; beta                                                                     | 0.5749 | 0.0437 |
| 209593_s_at | TOR1B   | torsin family 1; member B (torsin B)                                                              | 0.6776 | 0.0219 |
| 209621_s_at | PDLIM3  | PDZ and LIM domain 3                                                                              | 0.8831 | 0.0474 |
| 209624_s_at | MCCC2   | methylcrotonoyl-Coenzyme A carboxylase 2 (beta)                                                   | 0.7646 | 0.0353 |
| 209626_s_at | OSBPL3  | oxysterol binding protein-like 3                                                                  | 0.9674 | 0.0042 |
| 209627_s_at | OSBPL3  | oxysterol binding protein-like 3                                                                  | 1.0149 | 0.0175 |
| 209628_at   | NXT2    | nuclear transport factor 2-like export factor 2                                                   | 1.6954 | 0.0003 |
| 209629_s_at | NXT2    | nuclear transport factor 2-like export factor 2                                                   | 2.0911 | 0.0006 |

|             |             |                                                                                                                                                                          |        |        |
|-------------|-------------|--------------------------------------------------------------------------------------------------------------------------------------------------------------------------|--------|--------|
| 209635_at   | AP1S1       | adaptor-related protein complex 1; sigma 1 subunit                                                                                                                       | 1.9583 | 0      |
| 209637_s_at | RGS12       | regulator of G-protein signaling 12                                                                                                                                      | 0.1775 | 0.0386 |
| 209642_at   | BUB1        | BUB1 budding uninhibited by benzimidazoles 1 homolog (yeast)                                                                                                             | 3.0216 | 0      |
| 209644_x_at | CDKN2A      | cyclin-dependent kinase inhibitor 2A (melanoma; p16; inhibits CDK4)                                                                                                      | 1.2395 | 0.0022 |
| 209653_at   | KPNA4       | karyopherin alpha 4 (importin alpha 3)                                                                                                                                   | 1.2282 | 0.0054 |
| 209662_at   | CETN3       | centrin; EF-hand protein; 3 (CDC31 homolog; yeast)                                                                                                                       | 0.4576 | 0.0126 |
| 209678_s_at | PRKCI       | protein kinase C; iota                                                                                                                                                   | 0.4839 | 0.032  |
| 209680_s_at | KIFC1       | kinesin family member C1                                                                                                                                                 | 0.6677 | 0.0177 |
| 209695_at   | PTP4A3      | protein tyrosine phosphatase type IVA; member 3                                                                                                                          | 1.2152 | 0.0007 |
| 209709_s_at | HMMR        | hyaluronan-mediated motility receptor (RHAMM)                                                                                                                            | 2.6587 | 0      |
| 209714_s_at | CDKN3       | cyclin-dependent kinase inhibitor 3 (CDK2-associated dual specificity phosphatase)                                                                                       | 3.9511 | 0      |
| 209715_at   | CBX5        | chromobox homolog 5 (HP1 alpha homolog; Drosophila)                                                                                                                      | 0.9406 | 0.0004 |
| 209721_s_at | HOM-TES-103 | hypothetical protein LOC25900                                                                                                                                            | 1.2599 | 0.0002 |
| 209725_at   | LOC653877   | UTP20; small subunit (SSU) processome component; homolog (yeast), similar to Down-regulated in metastasis protein (Key-1A6 protein) (Novel nucleolar protein 73) (NNP73) | 0.8753 | 0.0021 |
| 209743_s_at | ITCH        | itchy homolog E3 ubiquitin protein ligase (mouse)                                                                                                                        | 0.9842 | 0.0009 |
| 209744_x_at | ITCH        | itchy homolog E3 ubiquitin protein ligase (mouse)                                                                                                                        | 1.219  | 0.0009 |
| 209750_at   | NR1D2       | nuclear receptor subfamily 1; group D; member 2                                                                                                                          | 1.8864 | 0.0001 |
| 209753_s_at | TMPO        | thymopoietin                                                                                                                                                             | 1.8009 | 0.0001 |
| 209754_s_at | TMPO        | thymopoietin                                                                                                                                                             | 2.8766 | 0      |
| 209760_at   | KIAA0922    | KIAA0922                                                                                                                                                                 | 1.1851 | 0.0003 |
| 209766_at   | PRDX3       | peroxiredoxin 3                                                                                                                                                          | 0.3396 | 0.0288 |
| 209773_s_at | RRM2        | ribonucleotide reductase M2 polypeptide                                                                                                                                  | 4.4587 | 0      |
| 209780_at   | PHTF2       | putative homeodomain transcription factor 2                                                                                                                              | 1.5697 | 0      |
| 209782_s_at | DBP         | D site of albumin promoter (albumin D-box) binding protein                                                                                                               | 1.8434 | 0      |
| 209790_s_at | CASP6       | caspase 6; apoptosis-related cysteine peptidase                                                                                                                          | 1.3247 | 0.0005 |
| 209797_at   | TMEM4       | transmembrane protein 4                                                                                                                                                  | 0.5834 | 0.0347 |
| 209799_at   | PRKAA1      | protein kinase; AMP-activated; alpha 1 catalytic subunit                                                                                                                 | 0.5576 | 0.0498 |
| 209804_at   | DCLRE1A     | DNA cross-link repair 1A (PSO2 homolog; S. cerevisiae)                                                                                                                   | 0.8853 | 0      |
| 209805_at   | PMS2        | PMS2 postmeiotic segregation increased 2 (S. cerevisiae), PMS2-C terminal-like                                                                                           | 0.7034 | 0.0013 |

|             |          |                                                                                                                     |        |        |
|-------------|----------|---------------------------------------------------------------------------------------------------------------------|--------|--------|
| 209811_at   | CASP2    | caspace 2; apoptosis-related cysteine peptidase (neural precursor cell expressed; developmentally down-regulated 2) | 0.711  | 0.0005 |
| 209812_x_at | CASP2    | caspace 2; apoptosis-related cysteine peptidase (neural precursor cell expressed; developmentally down-regulated 2) | 0.208  | 0.0144 |
| 209814_at   | ZNF330   | zinc finger protein 330                                                                                             | 0.4637 | 0.0402 |
| 209832_s_at | CDT1     | chromatin licensing and DNA replication factor 1                                                                    | 1.0482 | 0.0013 |
| 209833_at   | CRADD    | CASP2 and RIPK1 domain containing adaptor with death domain                                                         | 0.7248 | 0.0405 |
| 209844_at   | HOXB13   | homeobox B13                                                                                                        | 0.1624 | 0.0352 |
| 209845_at   | MKRN1    | makorin; ring finger protein; 1                                                                                     | 0.639  | 0.0038 |
| 209856_x_at | ABI2     | abl interactor 2                                                                                                    | 0.593  | 0.039  |
| 209862_s_at | CEP57    | centrosomal protein 57kDa                                                                                           | 0.6305 | 0.0435 |
| 209869_at   | ADRA2A   | adrenergic; alpha-2A-; receptor                                                                                     | 1.7852 | 0.0126 |
| 209875_s_at | SPP1     | secreted phosphoprotein 1 (osteopontin; bone sialoprotein I; early T-lymphocyte activation 1)                       | 4.8771 | 0      |
| 209890_at   | TSPAN5   | tetraspanin 5                                                                                                       | 1.1887 | 0.0049 |
| 209891_at   | SPC25    | SPC25; NDC80 kinetochore complex component; homolog (S. cerevisiae)                                                 | 1.4566 | 0.0019 |
| 209895_at   | PTPN11   | protein tyrosine phosphatase; non-receptor type 11 (Noonan syndrome 1)                                              | 0.9654 | 0.0094 |
| 209896_s_at | PTPN11   | protein tyrosine phosphatase; non-receptor type 11 (Noonan syndrome 1)                                              | 1.11   | 0.0042 |
| 209900_s_at | SLC16A1  | solute carrier family 16; member 1 (monocarboxylic acid transporter 1)                                              | 0.7151 | 0.009  |
| 209913_x_at | KIAA0415 | KIAA0415                                                                                                            | 0.4779 | 0.0046 |
| 209921_at   | SLC7A11  | solute carrier family 7; (cationic amino acid transporter; y+ system) member 11                                     | 1.3524 | 0.0215 |
| 209922_at   | BRAP     | BRCA1 associated protein                                                                                            | 0.4617 | 0.0278 |
| 209932_s_at | DUT      | dUTP pyrophosphatase                                                                                                | 0.4462 | 0.0035 |
| 209936_at   | RBM5     | RNA binding motif protein 5                                                                                         | 0.5188 | 0.0334 |
| 209953_s_at | CDC37    | cell division cycle 37 homolog (S. cerevisiae)                                                                      | 0.6151 | 0.0007 |
| 209955_s_at | FAP      | fibroblast activation protein; alpha                                                                                | 1.8635 | 0.0019 |
| 209974_s_at | BUB3     | BUB3 budding uninhibited by benzimidazoles 3 homolog (yeast)                                                        | 0.4305 | 0.0237 |
| 210008_s_at | MRPS12   | mitochondrial ribosomal protein S12                                                                                 | 0.3799 | 0.0119 |
| 210018_x_at | MALT1    | mucosa associated lymphoid tissue lymphoma translocation gene 1                                                     | 0.3281 | 0.0463 |
| 210021_s_at | CCNO     | cyclin O                                                                                                            | 0.2604 | 0.0467 |
| 210022_at   | PCGF1    | polycomb group ring finger 1                                                                                        | 0.7894 | 0.007  |
| 210023_s_at | PCGF1    | polycomb group ring finger 1                                                                                        | 0.6942 | 0.0098 |
| 210029_at   | INDO     | indoleamine-pyrrole 2;3 dioxygenase                                                                                 | 1.0082 | 0.0287 |

|             |         |                                                                                                                  |        |        |
|-------------|---------|------------------------------------------------------------------------------------------------------------------|--------|--------|
| 210036_s_at | KCNH2   | potassium voltage-gated channel; subfamily H (eag-related); member 2                                             | 2.3132 | 0.0043 |
| 210040_at   | SLC12A5 | solute carrier family 12; (potassium-chloride transporter) member 5                                              | 1.3189 | 0.0094 |
| 210046_s_at | IDH2    | isocitrate dehydrogenase 2 (NADP+); mitochondrial                                                                | 1.0403 | 0.0487 |
| 210050_at   | TPI1    | triosephosphate isomerase 1                                                                                      | 0.3958 | 0.0046 |
| 210052_s_at | TPX2    | TPX2; microtubule-associated; homolog ( <i>Xenopus laevis</i> )                                                  | 4.0424 | 0      |
| 210053_at   | TAF5    | TAF5 RNA polymerase II; TATA box binding protein (TBP)-associated factor; 100kDa                                 | 1.0079 | 0.0042 |
| 210054_at   | C4orf15 | chromosome 4 open reading frame 15                                                                               | 0.8977 | 0.0003 |
| 210057_at   | SMG1    | PI-3-kinase-related kinase SMG-1                                                                                 | 0.5343 | 0.0048 |
| 210074_at   | CTSL2   | cathepsin L2                                                                                                     | 1.1514 | 0.0155 |
| 210095_s_at | IGFBP3  | insulin-like growth factor binding protein 3                                                                     | 2.7459 | 0      |
| 210115_at   | RPL39L  | ribosomal protein L39-like                                                                                       | 1.1659 | 0.0019 |
| 210117_at   | SPAG1   | sperm associated antigen 1                                                                                       | 0.5379 | 0.0152 |
| 210124_x_at | SEMA4F  | sema domain; immunoglobulin domain (Ig); transmembrane domain (TM) and short cytoplasmic domain; (semaphorin) 4F | 0.3461 | 0.0121 |
| 210128_s_at | LTB4R   | leukotriene B4 receptor                                                                                          | 0.6388 | 0.0219 |
| 210132_at   | EFNA3   | ephrin-A3                                                                                                        | 0.8618 | 0.0472 |
| 210135_s_at | SHOX2   | short stature homeobox 2                                                                                         | 1.0153 | 0.0399 |
| 210188_at   | GABPA   | GA binding protein transcription factor; alpha subunit 60kDa                                                     | 0.7626 | 0.0028 |
| 210203_at   | CNOT4   | CCR4-NOT transcription complex; subunit 4                                                                        | 0.8036 | 0.0004 |
| 210206_s_at | DDX11   | DEAD/H (Asp-Glu-Ala-Asp/His) box polypeptide 11 (CHL1-like helicase homolog; <i>S. cerevisiae</i> )              | 0.5217 | 0.0059 |
| 210212_x_at | MTCP1   | mature T-cell proliferation 1                                                                                    | 0.6934 | 0.0208 |
| 210215_at   | TFR2    | transferrin receptor 2                                                                                           | 0.8236 | 0.027  |
| 210220_at   | FZD2    | frizzled homolog 2 ( <i>Drosophila</i> )                                                                         | 0.9297 | 0.0097 |
| 210240_s_at | CDKN2D  | cyclin-dependent kinase inhibitor 2D (p19; inhibits CDK4)                                                        | 1.1177 | 0      |
| 210242_x_at | ST20    | suppressor of tumorigenicity 20                                                                                  | 0.354  | 0.0078 |
| 210257_x_at | CUL4B   | cullin 4B                                                                                                        | 0.9549 | 0.019  |
| 210286_s_at | SLC4A7  | solute carrier family 4; sodium bicarbonate cotransporter; member 7                                              | 0.3218 | 0.0057 |
| 210287_s_at | FLT1    | fms-related tyrosine kinase 1 (vascular endothelial growth factor/vascular permeability factor receptor)         | 0.401  | 0.0136 |
| 210306_at   | L3MBTL  | l(3)mbt-like ( <i>Drosophila</i> )                                                                               | 0.8986 | 0.0015 |
| 210334_x_at | BIRC5   | baculoviral IAP repeat-containing 5 (survivin)                                                                   | 0.9515 | 0.002  |
| 210336_x_at | MZF1    | myeloid zinc finger 1                                                                                            | 0.9851 | 0.0013 |
| 210341_at   | MYT1    | myelin transcription factor 1                                                                                    | 0.5758 | 0.0101 |

|             |           |                                                                                              |        |        |
|-------------|-----------|----------------------------------------------------------------------------------------------|--------|--------|
| 210346_s_at | CLK4      | CDC-like kinase 4                                                                            | 0.5129 | 0.016  |
| 210361_s_at | ELF2      | E74-like factor 2 (ets domain transcription factor)                                          | 0.3479 | 0.0318 |
| 210368_at   | PCDHGA8   | protocadherin gamma subfamily A; 8, protocadherin gamma subfamily B; 4                       | 0.5616 | 0.0108 |
| 210377_at   | ACSM3     | acyl-CoA synthetase medium-chain family member 3                                             | 2.0374 | 0.0084 |
| 210379_s_at | TLK1      | tousled-like kinase 1                                                                        | 1.0807 | 0.0063 |
| 210400_at   | GRIN2C    | glutamate receptor; ionotropic; N-methyl D-aspartate 2C                                      | 0.6307 | 0.002  |
| 210407_at   | PPM1A     | protein phosphatase 1A (formerly 2C); magnesium-dependent; alpha isoform                     | 1.127  | 0.0003 |
| 210410_s_at | MSH5      | mutS homolog 5 (E. coli)                                                                     | 0.7634 | 0.0398 |
| 210424_s_at | GOLGA8A   | golgi autoantigen; golgin subfamily a; 8A, golgi autoantigen; golgin subfamily a; 8B         | 0.8816 | 0.0037 |
| 210425_x_at | GOLGA8B   | golgi autoantigen; golgin subfamily a; 8B                                                    | 1.4165 | 0.0012 |
| 210449_x_at | MAPK14    | mitogen-activated protein kinase 14                                                          | 0.8891 | 0.0403 |
| 210455_at   | C10orf28  | chromosome 10 open reading frame 28                                                          | 0.3194 | 0.0167 |
| 210463_x_at | TRMT1     | TRM1 tRNA methyltransferase 1 homolog (S. cerevisiae)                                        | 0.7151 | 0.0047 |
| 210470_x_at | NONO      | non-POU domain containing; octamer-binding                                                   | 0.547  | 0.0286 |
| 210495_x_at | FN1       | fibronectin 1                                                                                | 1.9731 | 0      |
| 210510_s_at | NRP1      | neuropilin 1                                                                                 | 0.8338 | 0.023  |
| 210525_x_at | C14orf143 | chromosome 14 open reading frame 143                                                         | 0.1012 | 0.0484 |
| 210527_x_at | TUBA3C    | tubulin; alpha 3c                                                                            | 0.2317 | 0.011  |
| 210529_s_at | FAM115A   | family with sequence similarity 115; member A, family with sequence similarity 115; member B | 1.2726 | 0.0207 |
| 210530_s_at | NR2C1     | nuclear receptor subfamily 2; group C; member 1                                              | 0.6377 | 0.0105 |
| 210531_at   | NR2C1     | nuclear receptor subfamily 2; group C; member 1                                              | 0.3573 | 0.019  |
| 210537_s_at | TADA2L    | transcriptional adaptor 2 (ADA2 homolog; yeast)-like                                         | 0.1912 | 0.0259 |
| 210540_s_at | B4GALT4   | UDP-Gal:betaGlcNAc beta 1;4-galactosyltransferase; polypeptide 4                             | 0.8437 | 0.0031 |
| 210543_s_at | PRKDC     | protein kinase; DNA-activated; catalytic polypeptide                                         | 0.9708 | 0.0441 |
| 210553_x_at | PCSK6     | proprotein convertase subtilisin/kexin type 6                                                | 0.4431 | 0.0106 |
| 210555_s_at | NFATC3    | nuclear factor of activated T-cells; cytoplasmic; calcineurin-dependent 3                    | 0.9174 | 0.0007 |
| 210556_at   | NFATC3    | nuclear factor of activated T-cells; cytoplasmic; calcineurin-dependent 3                    | 0.4516 | 0.047  |
| 210559_s_at | CDC2      | cell division cycle 2; G1 to S and G2 to M                                                   | 4.1926 | 0      |
| 210567_s_at | SKP2      | S-phase kinase-associated protein 2 (p45)                                                    | 1.3228 | 0.0051 |
| 210568_s_at | RECQL     | RecQ protein-like (DNA helicase Q1-like)                                                     | 0.7355 | 0.015  |

|             |          |                                                                                                                                                                                                                                                                                                                                                                                       |        |        |
|-------------|----------|---------------------------------------------------------------------------------------------------------------------------------------------------------------------------------------------------------------------------------------------------------------------------------------------------------------------------------------------------------------------------------------|--------|--------|
| 210585_s_at | TNPO2    | transportin 2 (importin 3; karyopherin beta 2b)                                                                                                                                                                                                                                                                                                                                       | 0.3206 | 0.0051 |
| 210595_at   | ZNF235   | zinc finger protein 235                                                                                                                                                                                                                                                                                                                                                               | 0.1876 | 0.0036 |
| 210598_at   |          |                                                                                                                                                                                                                                                                                                                                                                                       | 0.5624 | 0.0363 |
| 210621_s_at | RASA1    | RAS p21 protein activator (GTPase activating protein) 1                                                                                                                                                                                                                                                                                                                               | 0.7563 | 0.0243 |
| 210627_s_at | GCS1     | glucosidase I                                                                                                                                                                                                                                                                                                                                                                         | 0.5287 | 0.0216 |
| 210630_s_at | RAD52    | RAD52 homolog (S. cerevisiae)                                                                                                                                                                                                                                                                                                                                                         | 0.5397 | 0.01   |
| 210649_s_at | ARID1A   | AT rich interactive domain 1A (SWI-like)                                                                                                                                                                                                                                                                                                                                              | 0.7481 | 0.0094 |
| 210650_s_at | PCLO     | piccolo (presynaptic cytomatrix protein)                                                                                                                                                                                                                                                                                                                                              | 1.5    | 0.0113 |
| 210656_at   | EED      | embryonic ectoderm development                                                                                                                                                                                                                                                                                                                                                        | 1.1536 | 0.0055 |
| 210658_s_at | GGA2     | golgi associated; gamma adaptin ear containing; ARF binding protein 2                                                                                                                                                                                                                                                                                                                 | 1.1094 | 0.0002 |
| 210671_x_at | MAPK8    | mitogen-activated protein kinase 8                                                                                                                                                                                                                                                                                                                                                    | 0.2229 | 0.0164 |
| 210672_s_at | C16orf35 | chromosome 16 open reading frame 35                                                                                                                                                                                                                                                                                                                                                   | 0.6856 | 0.008  |
| 210674_s_at | PCDHA1   | protocadherin alpha 1, protocadherin alpha 10, protocadherin alpha 11, protocadherin alpha 12, protocadherin alpha 13, protocadherin alpha 2, protocadherin alpha 3, protocadherin alpha 4, protocadherin alpha 5, protocadherin alpha 6, protocadherin alpha 7, protocadherin alpha 8, protocadherin alpha 9, protocadherin alpha subfamily C; 1, protocadherin alpha subfamily C; 2 | 2.15   | 0.0179 |
| 210679_x_at |          |                                                                                                                                                                                                                                                                                                                                                                                       | 0.5703 | 0.0037 |
| 210686_x_at | SLC25A16 | solute carrier family 25 (mitochondrial carrier; Graves disease autoantigen); member 16                                                                                                                                                                                                                                                                                               | 0.6295 | 0      |
| 210693_at   | SPPL2B   | signal peptide peptidase-like 2B                                                                                                                                                                                                                                                                                                                                                      | 0.2249 | 0.0404 |
| 210694_s_at |          |                                                                                                                                                                                                                                                                                                                                                                                       | 0.8006 | 0.0077 |
| 210698_at   |          | Clone HQ0117 PRO0117                                                                                                                                                                                                                                                                                                                                                                  | 0.1007 | 0.0122 |
| 210701_at   | CFDP1    | craniofacial development protein 1                                                                                                                                                                                                                                                                                                                                                    | 1.3208 | 0.0023 |
| 210703_at   |          |                                                                                                                                                                                                                                                                                                                                                                                       | 0.1568 | 0.009  |
| 210706_s_at | RNF24    | ring finger protein 24                                                                                                                                                                                                                                                                                                                                                                | 0.7223 | 0.0363 |
| 210707_x_at | PMS2L11  | postmeiotic segregation increased 2-like 11                                                                                                                                                                                                                                                                                                                                           | 0.7363 | 0.0002 |
| 210717_at   |          | PRO1412                                                                                                                                                                                                                                                                                                                                                                               | 0.4371 | 0.0039 |
| 210719_s_at | HMG20B   | high-mobility group 20B                                                                                                                                                                                                                                                                                                                                                               | 0.4026 | 0.0301 |
| 210732_s_at | LGALS8   | lectin; galactoside-binding; soluble; 8 (galectin 8)                                                                                                                                                                                                                                                                                                                                  | 1.0324 | 0.0464 |
| 210743_s_at | CDC14A   | CDC14 cell division cycle 14 homolog A (S. cerevisiae)                                                                                                                                                                                                                                                                                                                                | 0.1721 | 0.0179 |
| 210749_x_at | DDR1     | discoidin domain receptor family; member 1                                                                                                                                                                                                                                                                                                                                            | 0.999  | 0.0033 |

|             |           |                                                                                                      |        |        |
|-------------|-----------|------------------------------------------------------------------------------------------------------|--------|--------|
| 210758_at   | PSIP1     | PC4 and SFRS1 interacting protein 1                                                                  | 0.3729 | 0.0337 |
| 210760_x_at | TRIP11    | thyroid hormone receptor interactor 11                                                               | 0.1569 | 0.0017 |
| 210765_at   | CSE1L     | CSE1 chromosome segregation 1-like (yeast)                                                           | 0.3798 | 0.0046 |
| 210766_s_at | CSE1L     | CSE1 chromosome segregation 1-like (yeast)                                                           | 0.4106 | 0.0273 |
| 210776_x_at | TCF3      | transcription factor 3 (E2A immunoglobulin enhancer binding factors E12/E47)                         | 0.901  | 0.0002 |
| 210787_s_at | CAMKK2    | calcium/calmodulin-dependent protein kinase kinase 2; beta                                           | 0.5414 | 0.0063 |
| 210800_at   | TIMM8A    | translocase of inner mitochondrial membrane 8 homolog A (yeast)                                      | 0.3644 | 0.0073 |
| 210811_s_at | DDX49     | DEAD (Asp-Glu-Ala-Asp) box polypeptide 49                                                            | 0.6295 | 0.0015 |
| 210813_s_at | XRCC4     | X-ray repair complementing defective repair in Chinese hamster cells 4                               | 0.7171 | 0.0038 |
| 210820_x_at | COQ7      | coenzyme Q7 homolog; ubiquinone (yeast)                                                              | 0.6655 | 0.0297 |
| 210821_x_at | CENPA     | centromere protein A                                                                                 | 0.5313 | 0.0215 |
| 210822_at   | LOC283345 | RPL13-2 pseudogene                                                                                   | 0.6434 | 0.0318 |
| 210826_x_at | RAD17     | RAD17 homolog (S. pombe)                                                                             | 0.9029 | 0.0036 |
| 210829_s_at | SSBP2     | single-stranded DNA binding protein 2                                                                | 1.5787 | 0.0043 |
| 210849_s_at | VPS41     | vacuolar protein sorting 41 homolog (S. cerevisiae)                                                  | 1.1051 | 0      |
| 210871_x_at | SSX2IP    | synovial sarcoma; X breakpoint 2 interacting protein                                                 | 0.3978 | 0.0243 |
| 210878_s_at | JMJD1B    | jumonji domain containing 1B                                                                         | 0.5134 | 0.0085 |
| 210881_s_at | IGF2      | insulin- insulin-like growth factor 2, insulin-like growth factor 2 (somatomedin A)                  | 6.2195 | 0      |
| 210892_s_at | GTF2I     | general transcription factor II; i                                                                   | 1.2031 | 0.0027 |
| 210910_s_at | POMZP3    | POM (POM121 homolog; rat) and ZP3 fusion                                                             | 0.9931 | 0.0347 |
| 210920_x_at |           | CDNA clone IMAGE:3609012                                                                             | 0.1795 | 0.0209 |
| 210933_s_at | FSCN1     | fascin homolog 1; actin-bundling protein (Strongylocentrotus purpuratus)                             | 1.081  | 0.0067 |
| 210947_s_at | MSH3      | mutS homolog 3 (E. coli)                                                                             | 0.842  | 0.0012 |
| 210959_s_at | SRD5A1    | steroid-5-alpha-reductase; alpha polypeptide 1 (3-oxo-5 alpha-steroid delta 4-dehydrogenase alpha 1) | 1.3058 | 0.0014 |
| 210965_x_at | CDC2L5    | cell division cycle 2-like 5 (cholinesterase-related cell division controller)                       | 0.3762 | 0      |
| 210966_x_at | LARP1     | La ribonucleoprotein domain family; member 1                                                         | 0.5769 | 0.0225 |
| 210969_at   | PKN2      | protein kinase N2                                                                                    | 0.411  | 0.0016 |
| 210973_s_at | FGFR1     | fibroblast growth factor receptor 1 (fms-related tyrosine kinase 2; Pfeiffer syndrome)               | 2.6342 | 0      |
| 210974_s_at | AP3D1     | adaptor-related protein complex 3; delta 1 subunit                                                   | 0.6911 | 0.0067 |
| 210975_x_at | FASTK     | Fas-activated serine/threonine kinase                                                                | 0.6641 | 0.0001 |

|             |          |                                                                                                      |        |        |
|-------------|----------|------------------------------------------------------------------------------------------------------|--------|--------|
| 210983_s_at | MCM7     | minichromosome maintenance complex component 7                                                       | 1.9115 | 0.0005 |
| 210993_s_at | SMAD1    | SMAD family member 1                                                                                 | 1.0072 | 0.0034 |
| 210994_x_at | TRIM23   | tripartite motif-containing 23                                                                       | 0.6371 | 0.0211 |
| 210995_s_at | TRIM23   | tripartite motif-containing 23                                                                       | 0.9301 | 0.0044 |
| 211015_s_at | HSPA4    | heat shock 70kDa protein 4                                                                           | 1.0963 | 0.0036 |
| 211016_x_at | HSPA4    | heat shock 70kDa protein 4                                                                           | 1.6331 | 0.0018 |
| 211022_s_at | ATRX     | alpha thalassemia/mental retardation syndrome X-linked (RAD54 homolog; <i>S. cerevisiae</i> )        | 0.3793 | 0.0338 |
| 211027_s_at | IKBKB    | inhibitor of kappa light polypeptide gene enhancer in B-cells; kinase beta                           | 0.2412 | 0.0482 |
| 211034_s_at | FLJ30092 | AF-1 specific protein phosphatase                                                                    | 0.8724 | 0.001  |
| 211036_x_at | ANAPC5   | anaphase promoting complex subunit 5                                                                 | 0.4482 | 0.0004 |
| 211040_x_at | GTSE1    | G-2 and S-phase expressed 1                                                                          | 0.7739 | 0      |
| 211042_x_at | MCAM     | melanoma cell adhesion molecule                                                                      | 1.5492 | 0      |
| 211047_x_at | AP2S1    | adaptor-related protein complex 2; sigma 1 subunit                                                   | 0.3893 | 0.0048 |
| 211056_s_at | SRD5A1   | steroid-5-alpha-reductase; alpha polypeptide 1 (3-oxo-5 alpha-steroid delta 4-dehydrogenase alpha 1) | 1.2662 | 0.0006 |
| 211058_x_at | TUBA1B   | tubulin; alpha 1b                                                                                    | 0.4978 | 0      |
| 211065_x_at | PFKL     | phosphofructokinase; liver                                                                           | 0.8151 | 0.0019 |
| 211072_x_at | TUBA1B   | tubulin; alpha 1b                                                                                    | 0.4929 | 0      |
| 211078_s_at | STK3     | serine/threonine kinase 3 (STE20 homolog; yeast)                                                     | 0.3309 | 0.0347 |
| 211080_s_at | NEK2     | NIMA (never in mitosis gene a)-related kinase 2                                                      | 0.8707 | 0.018  |
| 211081_s_at | MAP4K5   | mitogen-activated protein kinase kinase kinase kinase 5                                              | 0.588  | 0.0066 |
| 211085_s_at | STK4     | serine/threonine kinase 4                                                                            | 0.5563 | 0.0152 |
| 211087_x_at | MAPK14   | mitogen-activated protein kinase 14                                                                  | 0.4495 | 0.0167 |
| 211088_s_at | PLK4     | polo-like kinase 4 ( <i>Drosophila</i> )                                                             | 0.2552 | 0.0249 |
| 211089_s_at | NEK3     | NIMA (never in mitosis gene a)-related kinase 3                                                      | 0.2891 | 0.035  |
| 211124_s_at | KITLG    | KIT ligand                                                                                           | 0.1771 | 0.043  |
| 211126_s_at | CSRP2    | cysteine and glycine-rich protein 2                                                                  | 2.0382 | 0.0002 |
| 211127_x_at | EDA      | ectodysplasin A                                                                                      | 0.7473 | 0.0005 |
| 211128_at   | EDA      | ectodysplasin A                                                                                      | 0.2633 | 0.0072 |
| 211129_x_at | EDA      | ectodysplasin A                                                                                      | 0.6603 | 0.0002 |
| 211130_x_at | EDA      | ectodysplasin A                                                                                      | 0.9135 | 0.0008 |
| 211137_s_at | ATP2C1   | ATPase; Ca <sup>++</sup> transporting; type 2C; member 1                                             | 0.7218 | 0.0113 |
| 211148_s_at | ANGPT2   | angiopoietin 2                                                                                       | 1.9214 | 0.0001 |
| 211165_x_at | EPHB2    | EPH receptor B2                                                                                      | 0.4993 | 0.0417 |
| 211168_s_at | UPF1     | UPF1 regulator of nonsense transcripts homolog (yeast)                                               | 0.4085 | 0.0063 |
| 211202_s_at | JARID1B  | jumonji; AT rich interactive domain 1B                                                               | 0.6936 | 0.0495 |



|             |          |                                                                                 |        |        |
|-------------|----------|---------------------------------------------------------------------------------|--------|--------|
| 211205_x_at | PIP5K1A  | phosphatidylinositol-4-phosphate 5-kinase; type I; alpha                        | 0.7503 | 0.0402 |
| 211208_s_at | CASK     | calcium/calmodulin-dependent serine protein kinase (MAGUK family)               | 0.5983 | 0.0025 |
| 211212_s_at | ORC5L    | origin recognition complex; subunit 5-like (yeast)                              | 1.3196 | 0.0005 |
| 211228_s_at | RAD17    | RAD17 homolog (S. pombe)                                                        | 0.8694 | 0.0013 |
| 211237_s_at | FGFR4    | fibroblast growth factor receptor 4                                             | 1.4338 | 0.0158 |
| 211270_x_at | PTBP1    | polypyrimidine tract binding protein 1                                          | 0.4174 | 0.0003 |
| 211271_x_at | PTBP1    | polypyrimidine tract binding protein 1                                          | 0.4106 | 0.0008 |
| 211277_x_at | APP      | amyloid beta (A4) precursor protein (peptidase nexin-II; Alzheimer disease)     | 0.3972 | 0.0167 |
| 211296_x_at | UBC      | ubiquitin C                                                                     | 0.1842 | 0.0009 |
| 211297_s_at | CDK7     | cyclin-dependent kinase 7 (MO15 homolog; Xenopus laevis; cdk-activating kinase) | 1.2323 | 0      |
| 211300_s_at | TP53     | tumor protein p53 (Li-Fraumeni syndrome)                                        | 0.623  | 0.0274 |
| 211303_x_at | PSMAL    | growth-inhibiting protein 26                                                    | 0.5318 | 0.0181 |
| 211318_s_at | RAE1     | RAE1 RNA export 1 homolog (S. pombe)                                            | 1.3486 | 0.0003 |
| 211352_s_at | NCOA3    | nuclear receptor coactivator 3                                                  | 0.8519 | 0.005  |
| 211374_x_at |          | PRO2829                                                                         | 0.2342 | 0.0042 |
| 211375_s_at | ILF3     | interleukin enhancer binding factor 3; 90kDa                                    | 0.7524 | 0.0003 |
| 211378_x_at | PPIA     | peptidylprolyl isomerase A (cyclophilin A)                                      | 0.2045 | 0.0001 |
| 211379_x_at | B3GALNT1 | beta-1,3-N-acetylgalactosaminyltransferase 1 (globoside blood group)            | 1.0983 | 0.0093 |
| 211382_s_at | TACC2    | transforming; acidic coiled-coil containing protein 2                           | 0.7664 | 0.0178 |
| 211404_s_at | APLP2    | amyloid beta (A4) precursor-like protein 2                                      | 0.6756 | 0.006  |
| 211411_at   |          | LDLR-FUT fusion protein (LDLR-FUT)                                              | 0.148  | 0.0493 |
| 211422_at   | TRPM3    | transient receptor potential cation channel; subfamily M; member 3              | 0.2938 | 0.0465 |
| 211424_x_at | METTL7A  | methyltransferase like 7A                                                       | 0.3059 | 0.0257 |
| 211454_x_at | FKSG49   | FKSG49                                                                          | 0.7222 | 0.0001 |
| 211459_at   |          |                                                                                 | 0.1661 | 0.0075 |
| 211464_x_at | CASP6    | caspase 6; apoptosis-related cysteine peptidase                                 | 0.549  | 0.01   |
| 211466_at   | NFIB     | nuclear factor I/B                                                              | 0.3868 | 0.0168 |
| 211471_s_at | RAB36    | RAB36; member RAS oncogene family                                               | 0.3346 | 0.0434 |
| 211478_s_at | DPP4     | dipeptidyl-peptidase 4 (CD26; adenosine deaminase complexing protein 2)         | 1.6858 | 0.0243 |
| 211502_s_at | PFTK1    | PFTAIRE protein kinase 1                                                        | 0.2091 | 0.0045 |
| 211518_s_at | BMP4     | bone morphogenetic protein 4                                                    | 1.597  | 0.0143 |
| 211519_s_at | KIF2C    | kinesin family member 2C                                                        | 1.0431 | 0.0276 |

|             |          |                                                                                        |        |        |
|-------------|----------|----------------------------------------------------------------------------------------|--------|--------|
| 211522_s_at | GNRHR    | gonadotropin-releasing hormone receptor                                                | 1.5292 | 0.0313 |
| 211526_s_at | RTEL1    | regulator of telomere elongation helicase 1                                            | 0.2083 | 0.0059 |
| 211535_s_at | FGFR1    | fibroblast growth factor receptor 1 (fms-related tyrosine kinase 2; Pfeiffer syndrome) | 2.1148 | 0      |
| 211536_x_at | MAP3K7   | mitogen-activated protein kinase kinase kinase 7                                       | 1.067  | 0.0043 |
| 211537_x_at | MAP3K7   | mitogen-activated protein kinase kinase kinase 7                                       | 0.9071 | 0.0332 |
| 211543_s_at | GRK6     | G protein-coupled receptor kinase 6                                                    | 0.3439 | 0.0206 |
| 211547_s_at | PAFAH1B1 | platelet-activating factor acetylhydrolase; isoform lb; alpha subunit 45kDa            | 0.9249 | 0.0177 |
| 211553_x_at | APAF1    | apoptotic peptidase activating factor 1                                                | 0.118  | 0.0136 |
| 211554_s_at | APAF1    | apoptotic peptidase activating factor 1                                                | 0.2701 | 0.0001 |
| 211555_s_at | GUCY1B3  | guanylate cyclase 1; soluble; beta 3                                                   | 0.4241 | 0.0103 |
| 211559_s_at | CCNG2    | cyclin G2                                                                              | 1.6908 | 0.0025 |
| 211561_x_at | MAPK14   | mitogen-activated protein kinase 14                                                    | 1.0118 | 0.0273 |
| 211565_at   | SH3GL3   | SH3-domain GRB2-like 3                                                                 | 0.2076 | 0.0287 |
| 211602_s_at | TRPC1    | transient receptor potential cation channel; subfamily C; member 1                     | 1.0378 | 0.002  |
| 211651_s_at | LAMB1    | laminin; beta 1                                                                        | 1.1427 | 0.0413 |
| 211671_s_at | NR3C1    | nuclear receptor subfamily 3; group C; member 1 (glucocorticoid receptor)              | 0.8075 | 0.0131 |
| 211678_s_at | ZNF313   | zinc finger protein 313                                                                | 0.3045 | 0.0163 |
| 211707_s_at | IQCB1    | IQ motif containing B1                                                                 | 0.5474 | 0.0215 |
| 211708_s_at | SCD      | stearoyl-CoA desaturase (delta-9-desaturase)                                           | 1.8124 | 0.0283 |
| 211713_x_at | KIAA0101 | KIAA0101                                                                               | 0.8302 | 0.0005 |
| 211719_x_at | FN1      | fibronectin 1                                                                          | 1.6998 | 0.0001 |
| 211721_s_at | ZNF551   | zinc finger protein 551                                                                | 1.2018 | 0.0011 |
| 211750_x_at | TUBA1C   | tubulin; alpha 1c                                                                      | 0.5755 | 0      |
| 211759_x_at | TBCB     | tubulin folding cofactor B                                                             | 0.4674 | 0.0022 |
| 211762_s_at | KPNA2    | karyopherin alpha 2 (RAG cohort 1; importin alpha 1)                                   | 0.8129 | 0.0107 |
| 211765_x_at | PPIA     | peptidylprolyl isomerase A (cyclophilin A)                                             | 0.2002 | 0.0001 |
| 211766_s_at | PNLIPRP2 | pancreatic lipase-related protein 2                                                    | 0.5363 | 0.0408 |
| 211767_at   | GINS4    | GINS complex subunit 4 (Sld5 homolog)                                                  | 0.8169 | 0.0045 |
| 211789_s_at | MLXIP    | MLX interacting protein                                                                | 0.5467 | 0.0031 |
| 211793_s_at | ABI2     | abl interactor 2                                                                       | 0.9129 | 0.0108 |
| 211804_s_at | CDK2     | cyclin-dependent kinase 2                                                              | 0.9507 | 0.0134 |
| 211812_s_at | B3GALNT1 | beta-1,3-N-acetylgalactosaminyltransferase 1 (globoside blood group)                   | 0.8761 | 0.0063 |
| 211814_s_at | CCNE2    | cyclin E2                                                                              | 0.608  | 0.021  |
| 211828_s_at | TNIK     | TRAF2 and NCK interacting kinase                                                       | 1.9247 | 0.0031 |

|             |              |                                                                                                                                                                      |        |        |
|-------------|--------------|----------------------------------------------------------------------------------------------------------------------------------------------------------------------|--------|--------|
| 211833_s_at | BAX          | BCL2-associated X protein                                                                                                                                            | 1.8962 | 0      |
| 211851_x_at | BRCA1        | breast cancer 1; early onset                                                                                                                                         | 0.3677 | 0.0119 |
| 211855_s_at | SLC25A14     | solute carrier family 25 (mitochondrial carrier; brain); member 14                                                                                                   | 0.6119 | 0.038  |
| 211865_s_at | FZR1         | fizzy/cell division cycle 20 related 1 (Drosophila)                                                                                                                  | 0.3034 | 0.039  |
| 211874_s_at | MYST4        | MYST histone acetyltransferase (monocytic leukemia) 4                                                                                                                | 0.58   | 0.0116 |
| 211875_x_at | PCDHGA10     | protocadherin gamma subfamily A; 10                                                                                                                                  | 0.5085 | 0.0252 |
| 211923_s_at | ZNF471       | zinc finger protein 471                                                                                                                                              | 0.1509 | 0.044  |
| 211928_at   | DYNC1H1      | dynein; cytoplasmic 1; heavy chain 1                                                                                                                                 | 0.3215 | 0.0461 |
| 211935_at   | ARL6IP1      | ADP-ribosylation factor-like 6 interacting protein 1                                                                                                                 | 0.2794 | 0.0071 |
| 211947_s_at | BAT2D1       | BAT2 domain containing 1                                                                                                                                             | 0.6941 | 0.0251 |
| 211948_x_at | BAT2D1       | BAT2 domain containing 1                                                                                                                                             | 0.738  | 0.0228 |
| 211968_s_at | HSP90AA1     | heat shock protein 90kDa alpha (cytosolic); class A member 1                                                                                                         | 0.3327 | 0.037  |
| 211969_at   | HSP90AA1     | heat shock protein 90kDa alpha (cytosolic); class A member 1                                                                                                         | 0.2526 | 0.0245 |
| 211977_at   | GPR107       | G protein-coupled receptor 107                                                                                                                                       | 0.718  | 0.0296 |
| 211978_x_at | PPIA         | peptidylprolyl isomerase A (cyclophilin A)                                                                                                                           | 0.213  | 0      |
| 211980_at   | COL4A1       | collagen; type IV; alpha 1                                                                                                                                           | 0.8157 | 0.0011 |
| 211981_at   | COL4A1       | collagen; type IV; alpha 1                                                                                                                                           | 1.4477 | 0.0029 |
| 211982_x_at | XPO6         | exportin 6                                                                                                                                                           | 0.8572 | 0      |
| 211992_at   | WNK1         | WNK lysine deficient protein kinase 1                                                                                                                                | 0.4709 | 0.0082 |
| 211994_at   | WNK1         | WNK lysine deficient protein kinase 1                                                                                                                                | 0.4977 | 0.0093 |
| 211996_s_at | DKFZp547E087 | KIAA0220-like protein, hypothetical gene LOC283846, hypothetical protein LOC440345, nuclear pore complex interacting protein pseudogene, similar to Protein KIAA0220 | 0.4563 | 0.0108 |
| 212000_at   | SFRS14       | splicing factor; arginine/serine-rich 14                                                                                                                             | 1.0501 | 0      |
| 212001_at   | SFRS14       | splicing factor; arginine/serine-rich 14                                                                                                                             | 0.7479 | 0.0001 |
| 212007_at   | UBXD2        | UBX domain containing 2                                                                                                                                              | 0.4566 | 0.0151 |
| 212008_at   | UBXD2        | UBX domain containing 2                                                                                                                                              | 1.1925 | 0.0018 |
| 212009_s_at | STIP1        | stress-induced-phosphoprotein 1 (Hsp70/Hsp90-organizing protein)                                                                                                     | 1.2424 | 0.0239 |
| 212015_x_at | PTBP1        | polypyrimidine tract binding protein 1                                                                                                                               | 0.4245 | 0.0008 |
| 212016_s_at | PTBP1        | polypyrimidine tract binding protein 1                                                                                                                               | 0.6567 | 0.0085 |
| 212020_s_at | MKI67        | antigen identified by monoclonal antibody Ki-67                                                                                                                      | 1.1359 | 0.0048 |
| 212021_s_at | MKI67        | antigen identified by monoclonal antibody Ki-67                                                                                                                      | 2.1302 | 0.0015 |
| 212022_s_at | MKI67        | antigen identified by monoclonal antibody Ki-67                                                                                                                      | 2.0319 | 0.001  |

|             |           |                                                                                       |        |        |
|-------------|-----------|---------------------------------------------------------------------------------------|--------|--------|
| 212023_s_at | MKI67     | antigen identified by monoclonal antibody Ki-67                                       | 1.289  | 0.0036 |
| 212028_at   | RBM25     | RNA binding motif protein 25                                                          | 0.5741 | 0.0277 |
| 212030_at   | RBM25     | RNA binding motif protein 25                                                          | 0.5476 | 0.0341 |
| 212038_s_at | VDAC1     | voltage-dependent anion channel 1                                                     | 0.3917 | 0.0243 |
| 212045_at   | GLG1      | golgi apparatus protein 1                                                             | 0.8229 | 0.0009 |
| 212053_at   | PDXDC1    | pyridoxal-dependent decarboxylase domain containing 1                                 | 0.4936 | 0.0065 |
| 212058_at   | SR140     | U2-associated SR140 protein                                                           | 0.4128 | 0.0217 |
| 212060_at   | SR140     | U2-associated SR140 protein                                                           | 0.5697 | 0.0021 |
| 212064_x_at | MAZ       | MYC-associated zinc finger protein (purine-binding transcription factor)              | 0.6455 | 0.0003 |
| 212072_s_at | CSNK2A1   | casein kinase 2; alpha 1 polypeptide                                                  | 0.6063 | 0.0043 |
| 212073_at   | CSNK2A1   | casein kinase 2; alpha 1 polypeptide, casein kinase 2; alpha 1 polypeptide pseudogene | 0.6325 | 0.0111 |
| 212074_at   | UNC84A    | unc-84 homolog A (C. elegans)                                                         | 0.3319 | 0.0243 |
| 212075_s_at | CSNK2A1   | casein kinase 2; alpha 1 polypeptide                                                  | 1.4618 | 0.0002 |
| 212079_s_at | MLL       | myeloid/lymphoid or mixed-lineage leukemia (trithorax homolog; Drosophila)            | 0.6133 | 0.0123 |
| 212082_s_at | MYL6      | myosin; light chain 6; alkali; smooth muscle and non-muscle                           | 0.1587 | 0.0194 |
| 212097_at   | CAV1      | caveolin 1; caveolae protein; 22kDa                                                   | 1.1133 | 0.0104 |
| 212098_at   | LOC151162 | hypothetical protein LOC151162                                                        | 0.4515 | 0.0433 |
| 212104_s_at | RBM9      | RNA binding motif protein 9                                                           | 0.8892 | 0.0082 |
| 212105_s_at | DHX9      | DEAH (Asp-Glu-Ala-His) box polypeptide 9                                              | 0.4715 | 0.0456 |
| 212107_s_at | DHX9      | DEAH (Asp-Glu-Ala-His) box polypeptide 9                                              | 0.8366 | 0.0385 |
| 212113_at   | LOC552889 | hypothetical LOC552889                                                                | 0.85   | 0.0001 |
| 212114_at   | LOC552889 | hypothetical LOC552889                                                                | 0.4881 | 0.0069 |
| 212115_at   | HN1L      | hematological and neurological expressed 1-like                                       | 0.4717 | 0.025  |
| 212126_at   |           | CDNA clone IMAGE:4842353                                                              | 1.3814 | 0      |
| 212132_at   | LSM14A    | LSM14A; SCD6 homolog A (S. cerevisiae)                                                | 0.5226 | 0.0134 |
| 212137_at   | LARP1     | La ribonucleoprotein domain family; member 1                                          | 0.2652 | 0.0047 |
| 212138_at   | PDS5A     | PDS5; regulator of cohesion maintenance; homolog A (S. cerevisiae)                    | 0.4911 | 0.0001 |
| 212141_at   | MCM4      | minichromosome maintenance complex component 4                                        | 1.6416 | 0.0001 |
| 212142_at   | MCM4      | minichromosome maintenance complex component 4                                        | 0.7422 | 0.003  |
| 212143_s_at | IGFBP3    | insulin-like growth factor binding protein 3                                          | 3.8834 | 0      |
| 212152_x_at | ARID1A    | AT rich interactive domain 1A (SWI-like)                                              | 0.4961 | 0.0089 |
| 212154_at   | SDC2      | syndecan 2                                                                            | 2.318  | 0.0002 |
| 212157_at   | SDC2      | syndecan 2                                                                            | 1.3819 | 0.0163 |
| 212158_at   | SDC2      | syndecan 2                                                                            | 1.7044 | 0.002  |

|             |              |                                                                                                                            |        |        |
|-------------|--------------|----------------------------------------------------------------------------------------------------------------------------|--------|--------|
| 212160_at   | XPOT         | exportin; tRNA (nuclear export receptor for tRNAs)                                                                         | 0.8775 | 0      |
| 212162_at   | KIDINS220    | kinase D-interacting substrate of 220 kDa                                                                                  | 0.4464 | 0.0184 |
| 212178_s_at | LOC100101267 | POM121 membrane glycoprotein (rat), POM121 membrane glycoprotein (rat) pseudogene, POM121 membrane glycoprotein (rat)-like | 0.6591 | 0.0226 |
| 212189_s_at | COG4         | component of oligomeric golgi complex 4                                                                                    | 0.3038 | 0.0364 |
| 212190_at   | SERPINE2     | serpin peptidase inhibitor; clade E (nexin; plasminogen activator inhibitor type 1); member 2                              | 1.7573 | 0.0367 |
| 212193_s_at | LARP1        | La ribonucleoprotein domain family; member 1                                                                               | 0.7449 | 0.0053 |
| 212194_s_at | TM9SF4       | transmembrane 9 superfamily protein member 4                                                                               | 1.8922 | 0      |
| 212198_s_at | TM9SF4       | transmembrane 9 superfamily protein member 4                                                                               | 1.0873 | 0.0001 |
| 212202_s_at | TMEM87A      | transmembrane protein 87A                                                                                                  | 0.4577 | 0.0135 |
| 212207_at   | MED13L       | mediator complex subunit 13-like                                                                                           | 0.4994 | 0.0391 |
| 212208_at   | MED13L       | mediator complex subunit 13-like                                                                                           | 0.7554 | 0.0117 |
| 212220_at   | PSME4        | proteasome (prosome; macropain) activator subunit 4                                                                        | 0.8546 | 0.0419 |
| 212234_at   | ASXL1        | additional sex combs like 1 (Drosophila)                                                                                   | 0.5301 | 0.0162 |
| 212238_at   | ASXL1        | additional sex combs like 1 (Drosophila)                                                                                   | 0.91   | 0.0024 |
| 212247_at   | NUP205       | nucleoporin 205kDa                                                                                                         | 0.9583 | 0      |
| 212252_at   | CAMKK2       | calcium/calmodulin-dependent protein kinase kinase 2; beta                                                                 | 0.6521 | 0.0172 |
| 212272_at   | LPIN1        | lipin 1                                                                                                                    | 1.0745 | 0.0054 |
| 212274_at   | LPIN1        | lipin 1                                                                                                                    | 1.1413 | 0.0003 |
| 212276_at   | LPIN1        | lipin 1                                                                                                                    | 0.8593 | 0.0071 |
| 212303_x_at |              |                                                                                                                            | 0.4546 | 0.0034 |
| 212307_s_at | OGT          | O-linked N-acetylglucosamine (GlcNAc) transferase (UDP-N-acetylglucosamine:polypeptide-N-acetylglucosaminyl transferase)   | 1.0114 | 0.0285 |
| 212317_at   | TNPO3        | transportin 3                                                                                                              | 0.7333 | 0.0002 |
| 212318_at   | TNPO3        | transportin 3                                                                                                              | 0.8048 | 0      |
| 212320_at   | TUBB         | tubulin; beta                                                                                                              | 0.341  | 0.0379 |
| 212322_at   | SGPL1        | sphingosine-1-phosphate lyase 1                                                                                            | 0.6765 | 0.0041 |
| 212332_at   | RBL2         | retinoblastoma-like 2 (p130)                                                                                               | 0.8444 | 0.0258 |
| 212337_at   | TI-227H      | hypothetical protein TI-227H, taurine upregulated gene 1                                                                   | 0.9442 | 0.0047 |
| 212340_at   | YIPF6        | Yip1 domain family; member 6                                                                                               | 0.7408 | 0.026  |
| 212349_at   | POFUT1       | protein O-fucosyltransferase 1                                                                                             | 0.5073 | 0.0024 |
| 212350_at   | TBC1D1       | TBC1 (tre-2/USP6; BUB2; cdc16) domain family; member 1                                                                     | 0.8768 | 0.0388 |
| 212356_at   | KIAA0323     | KIAA0323                                                                                                                   | 0.762  | 0.0243 |
| 212365_at   | MYO1B        | myosin IB                                                                                                                  | 0.9778 | 0.0313 |
| 212366_at   | ZNF292       | zinc finger protein 292                                                                                                    | 0.7127 | 0.0028 |

|             |           |                                                                                                                                  |        |        |
|-------------|-----------|----------------------------------------------------------------------------------------------------------------------------------|--------|--------|
| 212367_at   | FEM1B     | fem-1 homolog b (C. elegans)                                                                                                     | 0.4873 | 0.0061 |
| 212368_at   | ZNF292    | zinc finger protein 292                                                                                                          | 0.763  | 0.005  |
| 212369_at   | ZNF384    | zinc finger protein 384                                                                                                          | 0.3898 | 0.0454 |
| 212375_at   | EP400     | E1A binding protein p400                                                                                                         | 0.7611 | 0.015  |
| 212376_s_at | EP400     | E1A binding protein p400                                                                                                         | 1.1012 | 0.003  |
| 212379_at   | GART      | phosphoribosylglycinamide formyltransferase;<br>phosphoribosylglycinamide synthetase;<br>phosphoribosylaminoimidazole synthetase | 1.0349 | 0.0147 |
| 212384_at   | BAT1      | HLA-B associated transcript 1                                                                                                    | 0.5852 | 0.0243 |
| 212392_s_at | LOC652526 | phosphodiesterase 4D interacting protein<br>(myomegalin), similar to phosphodiesterase 4D<br>interacting protein isoform 2       | 0.2078 | 0.0475 |
| 212403_at   | UBE3B     | ubiquitin protein ligase E3B                                                                                                     | 0.3684 | 0.0297 |
| 212404_s_at | UBE3B     | ubiquitin protein ligase E3B                                                                                                     | 0.719  | 0.0014 |
| 212416_at   | SCAMP1    | secretory carrier membrane protein 1                                                                                             | 0.5568 | 0.0002 |
| 212417_at   | SCAMP1    | secretory carrier membrane protein 1                                                                                             | 1.1749 | 0.0005 |
| 212425_at   | SCAMP1    | secretory carrier membrane protein 1                                                                                             | 0.648  | 0.0287 |
| 212426_s_at | YWHAQ     | tyrosine 3-monooxygenase/tryptophan 5-<br>monooxygenase activation protein; theta<br>polypeptide                                 | 0.2232 | 0.0266 |
| 212430_at   | RBM38     | RNA binding motif protein 38                                                                                                     | 0.944  | 0.0035 |
| 212436_at   | TRIM33    | tripartite motif-containing 33                                                                                                   | 0.5702 | 0.0363 |
| 212452_x_at | MYST4     | MYST histone acetyltransferase (monocytic<br>leukemia) 4                                                                         | 0.477  | 0.0134 |
| 212463_at   | CD59      | CD59 molecule; complement regulatory protein                                                                                     | 0.6708 | 0.0475 |
| 212464_s_at | FN1       | fibronectin 1                                                                                                                    | 1.9447 | 0.0001 |
| 212469_at   | NIPBL     | Nipped-B homolog (Drosophila)                                                                                                    | 1.2499 | 0.0002 |
| 212474_at   | KIAA0241  | KIAA0241                                                                                                                         | 0.7557 | 0.0014 |
| 212475_at   | KIAA0241  | KIAA0241                                                                                                                         | 0.8297 | 0      |
| 212481_s_at | TPM4      | tropomyosin 4                                                                                                                    | 1.0648 | 0.0053 |
| 212483_at   | NIPBL     | Nipped-B homolog (Drosophila)                                                                                                    | 0.8522 | 0.0009 |
| 212485_at   | GPATCH8   | G patch domain containing 8                                                                                                      | 0.3402 | 0.0256 |
| 212487_at   | GPATCH8   | G patch domain containing 8                                                                                                      | 0.8797 | 0.0046 |
| 212488_at   | COL5A1    | collagen; type V; alpha 1                                                                                                        | 1.8151 | 0.0129 |
| 212489_at   | COL5A1    | collagen; type V; alpha 1                                                                                                        | 1.475  | 0.0102 |
| 212505_s_at | KIAA0892  | KIAA0892                                                                                                                         | 0.8965 | 0.0002 |
| 212520_s_at | SMARCA4   | SWI/SNF related; matrix associated; actin<br>dependent regulator of chromatin; subfamily a;<br>member 4                          | 1.157  | 0.0001 |
| 212529_at   | LSM12     | LSM12 homolog (S. cerevisiae)                                                                                                    | 0.4657 | 0.0348 |
| 212533_at   | WEE1      | WEE1 homolog (S. pombe)                                                                                                          | 1.1231 | 0      |

|             |          |                                                                          |        |        |
|-------------|----------|--------------------------------------------------------------------------|--------|--------|
| 212540_at   | CDC34    | cell division cycle 34 homolog ( <i>S. cerevisiae</i> )                  | 1.0051 | 0.0001 |
| 212542_s_at | PHIP     | pleckstrin homology domain interacting protein                           | 1.1734 | 0.0001 |
| 212546_s_at | FRYL     | FRY-like                                                                 | 0.6223 | 0.002  |
| 212571_at   | CHD8     | chromodomain helicase DNA binding protein 8                              | 0.6568 | 0.0036 |
| 212572_at   | STK38L   | serine/threonine kinase 38 like                                          | 0.6785 | 0.0368 |
| 212574_x_at | C19orf6  | chromosome 19 open reading frame 6                                       | 1.5685 | 0.0001 |
| 212575_at   | C19orf6  | chromosome 19 open reading frame 6                                       | 0.5335 | 0.0111 |
| 212576_at   | MGRN1    | mahogunin; ring finger 1                                                 | 0.6041 | 0.0089 |
| 212577_at   | SMCHD1   | structural maintenance of chromosomes flexible hinge domain containing 1 | 1.1894 | 0.0123 |
| 212581_x_at | GAPDH    | glyceraldehyde-3-phosphate dehydrogenase                                 | 0.5494 | 0      |
| 212582_at   | OSBPL8   | oxysterol binding protein-like 8                                         | 0.587  | 0.0007 |
| 212593_s_at | PDCD4    | programmed cell death 4 (neoplastic transformation inhibitor)            | 1.0049 | 0      |
| 212594_at   | PDCD4    | programmed cell death 4 (neoplastic transformation inhibitor)            | 1.2971 | 0.0001 |
| 212599_at   | AUTS2    | autism susceptibility candidate 2                                        | 1.5825 | 0.0024 |
| 212619_at   | KIAA0286 | KIAA0286 protein                                                         | 1.4474 | 0.0008 |
| 212621_at   | KIAA0286 | KIAA0286 protein                                                         | 2.3027 | 0      |
| 212624_s_at | CHN1     | chimerin (chimaerin) 1                                                   | 1.4485 | 0.0013 |
| 212635_at   | TNPO1    | transportin 1                                                            | 0.6173 | 0.0001 |
| 212639_x_at | TUBA1B   | tubulin; alpha 1b                                                        | 0.518  | 0      |
| 212655_at   | ZCCHC14  | zinc finger; CCHC domain containing 14                                   | 0.8164 | 0.001  |
| 212661_x_at | PPIA     | peptidylprolyl isomerase A (cyclophilin A)                               | 0.1988 | 0      |
| 212669_at   | CAMK2G   | calcium/calmodulin-dependent protein kinase (CaM kinase) II gamma        | 0.5127 | 0.0146 |
| 212673_at   | METAP1   | methionyl aminopeptidase 1                                               | 0.6845 | 0.0106 |
| 212684_at   | ZNF3     | zinc finger protein 3                                                    | 1.0061 | 0.0002 |
| 212686_at   | PPM1H    | protein phosphatase 1H (PP2C domain containing)                          | 0.8847 | 0.0288 |
| 212689_s_at | JMJD1A   | jumonji domain containing 1A                                             | 0.9292 | 0.0018 |
| 212699_at   | SCAMP5   | secretory carrier membrane protein 5                                     | 0.8968 | 0.0392 |
| 212721_at   | SFRS12   | splicing factor; arginine/serine-rich 12                                 | 0.6792 | 0      |
| 212727_at   | DLG3     | discs; large homolog 3 (neuroendocrine-dlg; <i>Drosophila</i> )          | 0.4014 | 0.0419 |
| 212729_at   | DLG3     | discs; large homolog 3 (neuroendocrine-dlg; <i>Drosophila</i> )          | 0.8569 | 0.0068 |
| 212743_at   | RCHY1    | ring finger and CHY zinc finger domain containing 1                      | 0.2045 | 0.0342 |
| 212746_s_at | CEP170   | centrosomal protein 170kDa                                               | 0.7313 | 0.0478 |
| 212751_at   | UBE2N    | ubiquitin-conjugating enzyme E2N (UBC13 homolog; yeast)                  | 0.3951 | 0.0289 |
| 212754_s_at | MON2     | MON2 homolog ( <i>S. cerevisiae</i> )                                    | 0.6267 | 0.0036 |

|             |           |                                                                                               |        |        |
|-------------|-----------|-----------------------------------------------------------------------------------------------|--------|--------|
| 212757_s_at | CAMK2G    | calcium/calmodulin-dependent protein kinase (CaM kinase) II gamma                             | 0.3832 | 0.0308 |
| 212771_at   | C10orf38  | chromosome 10 open reading frame 38                                                           | 2.698  | 0.0001 |
| 212777_at   | SOS1      | son of sevenless homolog 1 (Drosophila)                                                       | 0.5531 | 0.0066 |
| 212781_at   | RBBP6     | retinoblastoma binding protein 6                                                              | 0.4446 | 0.0439 |
| 212783_at   | RBBP6     | retinoblastoma binding protein 6                                                              | 0.8162 | 0.0019 |
| 212784_at   | CIC       | capicua homolog (Drosophila)                                                                  | 0.6241 | 0.0005 |
| 212789_at   | NCAPD3    | non-SMC condensin II complex; subunit D3                                                      | 0.4986 | 0.0398 |
| 212794_s_at | KIAA1033  | KIAA1033                                                                                      | 1.1848 | 0.0001 |
| 212795_at   | KIAA1033  | KIAA1033                                                                                      | 0.4048 | 0.003  |
| 212797_at   | SORT1     | sortilin 1                                                                                    | 0.4072 | 0.0438 |
| 212798_s_at | ANKMY2    | ankyrin repeat and MYND domain containing 2                                                   | 0.7011 | 0.0066 |
| 212800_at   | STX6      | syntaxin 6                                                                                    | 0.7256 | 0.0048 |
| 212804_s_at | GAPVD1    | GTPase activating protein and VPS9 domains 1                                                  | 0.9824 | 0.0083 |
| 212806_at   | PRUNE2    | prune homolog 2 (Drosophila)                                                                  | 1.1061 | 0.0303 |
| 212808_at   | NFATC2IP  | nuclear factor of activated T-cells; cytoplasmic; calcineurin-dependent 2 interacting protein | 0.4729 | 0.0418 |
| 212809_at   | NFATC2IP  | nuclear factor of activated T-cells; cytoplasmic; calcineurin-dependent 2 interacting protein | 0.646  | 0.0012 |
| 212814_at   | KIAA0828  | adenosylhomocysteinase 3                                                                      | 0.6463 | 0.0162 |
| 212815_at   | ASCC3     | activating signal cointegrator 1 complex subunit 3                                            | 0.7192 | 0.0108 |
| 212825_at   | PAXIP1    | PAX interacting (with transcription-activation domain) protein 1                              | 1.3891 | 0      |
| 212836_at   | POLD3     | polymerase (DNA-directed); delta 3; accessory subunit                                         | 1.0502 | 0.0064 |
| 212840_at   | UBXD7     | UBX domain containing 7                                                                       | 0.7583 | 0.0135 |
| 212851_at   | DCUN1D4   | DCN1; defective in cullin neddylation 1; domain containing 4 (S. cerevisiae)                  | 0.7272 | 0.0091 |
| 212853_at   | DCUN1D4   | DCN1; defective in cullin neddylation 1; domain containing 4 (S. cerevisiae)                  | 0.6959 | 0.0173 |
| 212858_at   | PAQR4     | progesterone and adipoQ receptor family member IV                                             | 0.9479 | 0.0042 |
| 212861_at   | MFSD5     | major facilitator superfamily domain containing 5                                             | 0.9531 | 0.0006 |
| 212879_x_at | PIAS4     | protein inhibitor of activated STAT; 4                                                        | 0.7033 | 0.0017 |
| 212881_at   | PIAS4     | protein inhibitor of activated STAT; 4                                                        | 1.2022 | 0      |
| 212888_at   | DICER1    | Dicer1; Dcr-1 homolog (Drosophila)                                                            | 0.6336 | 0.0038 |
| 212892_at   | LOC731863 | similar to zinc finger protein 282, zinc finger protein 282                                   | 0.6627 | 0.0021 |
| 212897_at   | CDC2L6    | cell division cycle 2-like 6 (CDK8-like)                                                      | 1.2926 | 0.0001 |
| 212898_at   | KIAA0406  | KIAA0406                                                                                      | 0.7573 | 0.0001 |
| 212899_at   | CDC2L6    | cell division cycle 2-like 6 (CDK8-like)                                                      | 1.3875 | 0.0005 |



|             |           |                                                                                             |        |        |
|-------------|-----------|---------------------------------------------------------------------------------------------|--------|--------|
| 212910_at   | THAP11    | THAP domain containing 11                                                                   | 0.6028 | 0.0098 |
| 212913_at   | C6orf26   | chromosome 6 open reading frame 26, mutS homolog 5 (E. coli)                                | 0.6301 | 0.0155 |
| 212916_at   | LOC731069 | PHD finger protein 8, similar to PHD finger protein 8                                       | 0.4384 | 0.0226 |
| 212917_x_at | RECQL     | RecQ protein-like (DNA helicase Q1-like)                                                    | 0.526  | 0.0146 |
| 212919_at   | DCP2      | DCP2 decapping enzyme homolog (S. cerevisiae)                                               | 0.6091 | 0.0246 |
| 212921_at   | SMYD2     | SET and MYND domain containing 2                                                            | 1.3875 | 0.0059 |
| 212922_s_at | SMYD2     | SET and MYND domain containing 2                                                            | 1.1901 | 0.0008 |
| 212926_at   | SMC5      | structural maintenance of chromosomes 5                                                     | 0.8612 | 0.0066 |
| 212930_at   | ATP2B1    | ATPase; Ca <sup>++</sup> transporting; plasma membrane 1                                    | 1.6522 | 0.0001 |
| 212949_at   | NCAPH     | non-SMC condensin I complex; subunit H                                                      | 1.1738 | 0.0036 |
| 212957_s_at | LOC92249  | hypothetical protein LOC92249                                                               | 0.7122 | 0.0315 |
| 212960_at   | TBC1D9    | TBC1 domain family; member 9 (with GRAM domain)                                             | 0.3166 | 0.0167 |
| 212977_at   | CXCR7     | chemokine (C-X-C motif) receptor 7                                                          | 3.2504 | 0.0001 |
| 212982_at   | ZDHHC17   | zinc finger; DHHC-type containing 17                                                        | 0.4918 | 0.0033 |
| 212994_at   | THOC2     | THO complex 2                                                                               | 0.8296 | 0.0186 |
| 213001_at   | ANGPTL2   | angiopoietin-like 2                                                                         | 1.6911 | 0.0008 |
| 213004_at   | ANGPTL2   | angiopoietin-like 2                                                                         | 1.7729 | 0.0001 |
| 213007_at   | FANCI     | Fanconi anemia; complementation group I                                                     | 3.0935 | 0      |
| 213008_at   | FANCI     | Fanconi anemia; complementation group I                                                     | 2.6423 | 0      |
| 213011_s_at | TPI1      | triosephosphate isomerase 1                                                                 | 0.2893 | 0.0022 |
| 213017_at   | ABHD3     | abhydrolase domain containing 3                                                             | 0.7037 | 0.008  |
| 213018_at   | GATAD1    | GATA zinc finger domain containing 1                                                        | 0.9374 | 0.0002 |
| 213026_at   | ATG12     | ATG12 autophagy related 12 homolog (S. cerevisiae)                                          | 0.814  | 0      |
| 213054_at   | KIAA0841  | KIAA0841                                                                                    | 0.9595 | 0.0001 |
| 213072_at   | CYHR1     | cysteine/histidine-rich 1                                                                   | 0.3336 | 0.0331 |
| 213074_at   |           | Full-length cDNA clone CS0DF025YM09 of Fetal brain of Homo sapiens (human)                  | 0.5809 | 0.0094 |
| 213078_x_at | AGPAT7    | 1-acylglycerol-3-phosphate O-acyltransferase 7 (lysophosphatidic acid acyltransferase; eta) | 0.6072 | 0.0026 |
| 213082_s_at | SLC35D2   | solute carrier family 35; member D2                                                         | 0.7612 | 0.0001 |
| 213083_at   | SLC35D2   | solute carrier family 35; member D2                                                         | 0.711  | 0.0005 |
| 213088_s_at | DNAJC9    | DnaJ (Hsp40) homolog; subfamily C; member 9                                                 | 1.7971 | 0      |
| 213089_at   | GUSBP1    | glucuronidase; beta pseudogene 1                                                            | 1.6819 | 0.0001 |
| 213090_s_at | TAF4      | TAF4 RNA polymerase II; TATA box binding protein (TBP)-associated factor; 135kDa            | 1.272  | 0      |
| 213092_x_at | DNAJC9    | DnaJ (Hsp40) homolog; subfamily C; member 9                                                 | 1.5509 | 0      |

|             |           |                                                                  |        |        |
|-------------|-----------|------------------------------------------------------------------|--------|--------|
| 213097_s_at | ZRF1      | zuotin related factor 1                                          | 0.5455 | 0.0047 |
| 213107_at   | TNIK      | TRAF2 and NCK interacting kinase                                 | 1.2262 | 0.0386 |
| 213109_at   | TNIK      | TRAF2 and NCK interacting kinase                                 | 0.919  | 0.0133 |
| 213116_at   | NEK3      | NIMA (never in mitosis gene a)-related kinase 3                  | 0.5593 | 0.0486 |
| 213119_at   | SLC36A1   | solute carrier family 36 (proton/amino acid symporter); member 1 | 0.9525 | 0.0001 |
| 213120_at   | KIAA0701  | KIAA0701 protein                                                 | 0.3727 | 0.0008 |
| 213124_at   | ZNF473    | zinc finger protein 473                                          | 1.421  | 0.0004 |
| 213130_at   | ZNF473    | zinc finger protein 473                                          | 0.5735 | 0.0057 |
| 213134_x_at | BTG3      | BTG family; member 3                                             | 0.7277 | 0.0024 |
| 213140_s_at | SS18L1    | synovial sarcoma translocation gene on chromosome 18-like 1      | 0.4854 | 0.0409 |
| 213153_at   | SETD1B    | SET domain containing 1B                                         | 0.4651 | 0.0045 |
| 213175_s_at | SNRPB     | small nuclear ribonucleoprotein polypeptides B and B1            | 0.6457 | 0.0009 |
| 213178_s_at | MAPK8IP3  | mitogen-activated protein kinase 8 interacting protein 3         | 0.5564 | 0.0065 |
| 213190_at   | COG7      | component of oligomeric golgi complex 7                          | 0.7154 | 0.0091 |
| 213196_at   | ZNF629    | zinc finger protein 629                                          | 0.5196 | 0.0213 |
| 213198_at   | ACVR1B    | activin A receptor; type IB                                      | 0.8384 | 0.0034 |
| 213200_at   | SYP       | synaptophysin                                                    | 1.5134 | 0.0157 |
| 213202_at   | SETD1A    | SET domain containing 1A                                         | 0.3302 | 0.0483 |
| 213213_at   | DIDO1     | death inducer-obliterator 1                                      | 0.692  | 0.0239 |
| 213218_at   | ZNF187    | zinc finger protein 187                                          | 0.6864 | 0.0384 |
| 213226_at   | CCNA2     | cyclin A2                                                        | 2.793  | 0      |
| 213228_at   | PDE8B     | phosphodiesterase 8B                                             | 3.2634 | 0      |
| 213229_at   | DICER1    | Dicer1; Dcr-1 homolog (Drosophila)                               | 0.6366 | 0.0012 |
| 213231_at   | DMWD      | dystrophia myotonica; WD repeat containing                       | 0.3312 | 0.0053 |
| 213234_at   | KIAA1467  | KIAA1467                                                         | 0.9695 | 0.0151 |
| 213237_at   | LOC400506 | similar to TSG118.1                                              | 0.9858 | 0.0001 |
| 213241_at   | PLXNC1    | plexin C1                                                        | 1.7987 | 0      |
| 213244_at   | SCAMP4    | secretory carrier membrane protein 4                             | 0.6518 | 0.0075 |
| 213253_at   | SMC2      | structural maintenance of chromosomes 2                          | 1.38   | 0      |
| 213266_at   | 76P       | Gamma tubulin ring complex protein (76p gene)                    | 0.9399 | 0.0048 |
| 213267_at   | DOPEY1    | dopey family member 1                                            | 0.3156 | 0.0097 |
| 213286_at   | ZFR       | zinc finger RNA binding protein                                  | 0.6032 | 0.0248 |
| 213292_s_at | SNX13     | sorting nexin 13                                                 | 0.9393 | 0.0004 |
| 213298_at   | NFIC      | nuclear factor I/C (CCAAT-binding transcription factor)          | 0.4864 | 0.0419 |
| 213303_x_at | ZBTB7A    | zinc finger and BTB domain containing 7A                         | 0.2682 | 0.0318 |
| 213313_at   | RABGAP1   | RAB GTPase activating protein 1                                  | 0.4534 | 0.025  |

|             |              |                                                                                                                                                                                                                                                                                                                                                                                                                                                                                                                                                                                                                                                           |        |        |
|-------------|--------------|-----------------------------------------------------------------------------------------------------------------------------------------------------------------------------------------------------------------------------------------------------------------------------------------------------------------------------------------------------------------------------------------------------------------------------------------------------------------------------------------------------------------------------------------------------------------------------------------------------------------------------------------------------------|--------|--------|
| 213314_at   | C6orf162     | chromosome 6 open reading frame 162                                                                                                                                                                                                                                                                                                                                                                                                                                                                                                                                                                                                                       | 0.3741 | 0.025  |
| 213325_at   | PVRL3        | poliovirus receptor-related 3                                                                                                                                                                                                                                                                                                                                                                                                                                                                                                                                                                                                                             | 1.8203 | 0.0035 |
| 213330_s_at | STIP1        | stress-induced-phosphoprotein 1 (Hsp70/Hsp90-organizing protein)                                                                                                                                                                                                                                                                                                                                                                                                                                                                                                                                                                                          | 0.4468 | 0.0035 |
| 213334_x_at | UCHL5IP      | UCHL5 interacting protein                                                                                                                                                                                                                                                                                                                                                                                                                                                                                                                                                                                                                                 | 0.8945 | 0.0069 |
| 213346_at   | C13orf27     | chromosome 13 open reading frame 27                                                                                                                                                                                                                                                                                                                                                                                                                                                                                                                                                                                                                       | 0.7218 | 0.0202 |
| 213356_x_at | hCG_2023776  | hCG2023776, heterogeneous nuclear ribonucleoprotein A1, heterogeneous nuclear ribonucleoprotein A1 pseudogene, heterogeneous nuclear ribonucleoprotein A1 pseudogene 4, heterogeneous nuclear ribonucleoprotein A1 pseudogene 5, heterogeneous nuclear ribonucleoprotein A1-like, hypothetical LOC642817, similar to Heterogeneous nuclear ribonucleoprotein A1 (Helix-destabilizing protein) (Single-strand RNA-binding protein) (hnRNP core protein A1) (HDP), similar to Heterogeneous nuclear ribonucleoprotein A1 (Helix-destabilizing protein) (Single-strand binding protein) (hnRNP core protein A1) (HDP-1) (Topoisomerase-inhibitor suppressed) | 0.1695 | 0.003  |
| 213358_at   | KIAA0802     | KIAA0802                                                                                                                                                                                                                                                                                                                                                                                                                                                                                                                                                                                                                                                  | 0.4795 | 0.0385 |
| 213360_s_at | LOC100101267 | POM121 membrane glycoprotein (rat), POM121 membrane glycoprotein (rat) pseudogene, POM121 membrane glycoprotein (rat)-like                                                                                                                                                                                                                                                                                                                                                                                                                                                                                                                                | 0.3982 | 0.0081 |
| 213361_at   | TDRD7        | tudor domain containing 7                                                                                                                                                                                                                                                                                                                                                                                                                                                                                                                                                                                                                                 | 0.6735 | 0.0171 |
| 213368_x_at | PPFIA3       | protein tyrosine phosphatase; receptor type; f polypeptide (PTPRF); interacting protein (liprin); alpha 3                                                                                                                                                                                                                                                                                                                                                                                                                                                                                                                                                 | 0.996  | 0.0001 |
| 213370_s_at | SFMBT1       | Scm-like with four mbt domains 1                                                                                                                                                                                                                                                                                                                                                                                                                                                                                                                                                                                                                          | 0.7044 | 0.0087 |
| 213372_at   | PAQR3        | progesterin and adipoQ receptor family member III                                                                                                                                                                                                                                                                                                                                                                                                                                                                                                                                                                                                         | 1.1002 | 0.0022 |
| 213376_at   | ZBTB1        | zinc finger and BTB domain containing 1                                                                                                                                                                                                                                                                                                                                                                                                                                                                                                                                                                                                                   | 0.5299 | 0.0144 |
| 213378_s_at | DDX11        | DEAD/H (Asp-Glu-Ala-Asp/His) box polypeptide 11 (CHL1-like helicase homolog; S. cerevisiae), DEAD/H (Asp-Glu-Ala-Asp/His) box polypeptide 11-like, DEAD/H (Asp-Glu-Ala-Asp/His) box polypeptide 12 (CHL1-like helicase homolog; S. cerevisiae)                                                                                                                                                                                                                                                                                                                                                                                                            | 1.3427 | 0.0004 |
| 213387_at   | ATAD2B       | ATPase family; AAA domain containing 2B                                                                                                                                                                                                                                                                                                                                                                                                                                                                                                                                                                                                                   | 0.7289 | 0.0368 |
| 213388_at   | LOC727942    | similar to phosphodiesterase 4D interacting protein isoform 2                                                                                                                                                                                                                                                                                                                                                                                                                                                                                                                                                                                             | 1.2071 | 0.0026 |
| 213390_at   | C19orf7      | chromosome 19 open reading frame 7                                                                                                                                                                                                                                                                                                                                                                                                                                                                                                                                                                                                                        | 0.3677 | 0.031  |

|             |           |                                                                                          |        |        |
|-------------|-----------|------------------------------------------------------------------------------------------|--------|--------|
| 213391_at   | DPY19L4   | dpy-19-like 4 (C. elegans)                                                               | 0.5376 | 0.0404 |
| 213399_x_at | RPN2      | ribophorin II                                                                            | 0.2537 | 0.0057 |
| 213402_at   | ZNF787    | zinc finger protein 787                                                                  | 0.3909 | 0.0257 |
| 213406_at   | WSB1      | WD repeat and SOCS box-containing 1                                                      | 0.2223 | 0.0063 |
| 213410_at   | C10orf137 | chromosome 10 open reading frame 137                                                     | 0.8598 | 0.0012 |
| 213434_at   | STX2      | syntaxin 2                                                                               | 1.7364 | 0      |
| 213444_at   | LOC643641 | hypothetical protein LOC643641                                                           | 0.5625 | 0.0076 |
| 213445_at   | ZC3H3     | zinc finger CCCH-type containing 3                                                       | 1.2286 | 0      |
| 213446_s_at | IQGAP1    | IQ motif containing GTPase activating protein 1                                          | 0.7066 | 0.0181 |
| 213452_at   | ZNF184    | zinc finger protein 184                                                                  | 0.6943 | 0.0064 |
| 213453_x_at | GAPDH     | glyceraldehyde-3-phosphate dehydrogenase                                                 | 0.6502 | 0      |
| 213460_x_at | NSUN5C    | NOL1/NOP2/Sun domain family; member 5C                                                   | 0.9276 | 0.0044 |
| 213461_at   | NUDT21    | nudix (nucleoside diphosphate linked moiety X)-type motif 21                             | 0.9946 | 0.0138 |
| 213470_s_at | HNRPH1    | heterogeneous nuclear ribonucleoprotein H1 (H)                                           | 0.9915 | 0.0118 |
| 213472_at   | HNRPH1    | heterogeneous nuclear ribonucleoprotein H1 (H)                                           | 0.6267 | 0.0025 |
| 213476_x_at | MC1R      | melanocortin 1 receptor (alpha melanocyte stimulating hormone receptor), tubulin; beta 3 | 0.7912 | 0.017  |
| 213479_at   | NPTX2     | neuronal pentraxin II                                                                    | 2.337  | 0      |
| 213483_at   | PPWD1     | peptidylprolyl isomerase domain and WD repeat containing 1                               | 0.9552 | 0.0005 |
| 213491_x_at | RPN2      | ribophorin II                                                                            | 0.2749 | 0.0039 |
| 213505_s_at | SFRS14    | splicing factor; arginine/serine-rich 14                                                 | 0.4222 | 0.0005 |
| 213507_s_at | KPNB1     | karyopherin (importin) beta 1                                                            | 0.3749 | 0.0399 |
| 213511_s_at | MTMR1     | myotubularin related protein 1                                                           | 0.895  | 0.0007 |
| 213514_s_at | DIAPH1    | diaphanous homolog 1 (Drosophila)                                                        | 0.459  | 0.0051 |
| 213517_at   | PCBP2     | poly(rC) binding protein 2                                                               | 1.3837 | 0      |
| 213523_at   | CCNE1     | cyclin E1                                                                                | 3.0763 | 0      |
| 213530_at   | RAB3GAP1  | RAB3 GTPase activating protein subunit 1 (catalytic)                                     | 0.58   | 0.0058 |
| 213534_s_at | PASK      | PAS domain containing serine/threonine kinase                                            | 0.5423 | 0.0014 |
| 213535_s_at | UBE2I     | ubiquitin-conjugating enzyme E2I (UBC9 homolog; yeast)                                   | 0.3329 | 0.0357 |
| 213570_at   | EIF4E2    | eukaryotic translation initiation factor 4E family member 2                              | 0.7076 | 0.0021 |
| 213577_at   | SQLE      | squalene epoxidase                                                                       | 1.8738 | 0.0145 |

|             |           |                                                                                                                                                                                                                                                                                                                                   |        |        |
|-------------|-----------|-----------------------------------------------------------------------------------------------------------------------------------------------------------------------------------------------------------------------------------------------------------------------------------------------------------------------------------|--------|--------|
| 213594_x_at | FUSIP1    | FUS interacting protein (serine/arginine-rich) 1, similar to FUS interacting protein (serine-arginine rich) 1, similar to FUS-interacting serine-arginine-rich protein 1 (TLS-associated protein with Ser-Arg repeats) (TASR) (TLS-associated serine-arginine protein) (TLS-associated SR protein) (Neural-specific SR protein... | 0.6598 | 0.0235 |
| 213598_at   | KIF2A     | Kinesin heavy chain member 2A                                                                                                                                                                                                                                                                                                     | 1.5707 | 0      |
| 213599_at   | OIP5      | Opa interacting protein 5                                                                                                                                                                                                                                                                                                         | 1.8382 | 0.0012 |
| 213605_s_at | LOC728411 | Similar to Beta-glucuronidase precursor                                                                                                                                                                                                                                                                                           | 2.0855 | 0      |
| 213610_s_at | KLHL23    | kelch-like 23 (Drosophila)                                                                                                                                                                                                                                                                                                        | 0.5441 | 0.0315 |
| 213623_at   | KIF3A     | kinesin family member 3A                                                                                                                                                                                                                                                                                                          | 2.2788 | 0      |
| 213625_at   | ZKSCAN4   | zinc finger with KRAB and SCAN domains 4                                                                                                                                                                                                                                                                                          | 0.667  | 0.0321 |
| 213627_at   | MAGED2    | melanoma antigen family D; 2                                                                                                                                                                                                                                                                                                      | 0.8051 | 0.0065 |
| 213638_at   | PHACTR1   | phosphatase and actin regulator 1                                                                                                                                                                                                                                                                                                 | 0.4155 | 0.0101 |
| 213639_s_at | ZNF500    | zinc finger protein 500                                                                                                                                                                                                                                                                                                           | 0.9771 | 0      |
| 213641_at   | ZNF500    | zinc finger protein 500                                                                                                                                                                                                                                                                                                           | 0.5369 | 0      |
| 213646_x_at | TUBA1B    | tubulin; alpha 1b                                                                                                                                                                                                                                                                                                                 | 0.5347 | 0      |
| 213647_at   | DNA2L     | DNA2 DNA replication helicase 2-like (yeast)                                                                                                                                                                                                                                                                                      | 1.0269 | 0.0003 |
| 213650_at   | GOLGA8A   | golgi autoantigen; golgin subfamily a; 8A, golgi autoantigen; golgin subfamily a; 8B                                                                                                                                                                                                                                              | 0.794  | 0.0044 |
| 213653_at   | METTL3    | methyltransferase like 3                                                                                                                                                                                                                                                                                                          | 0.9216 | 0.0056 |
| 213654_at   | TAF5L     | TAF5-like RNA polymerase II; p300/CBP-associated factor (PCAF)-associated factor; 65kDa                                                                                                                                                                                                                                           | 0.4197 | 0.0253 |
| 213659_at   | ZNF75     | zinc finger protein 75 (D8C6)                                                                                                                                                                                                                                                                                                     | 0.6001 | 0.0325 |
| 213664_at   | SLC1A1    | solute carrier family 1 (neuronal/epithelial high affinity glutamate transporter; system Xag); member 1                                                                                                                                                                                                                           | 1.5982 | 0.0128 |
| 213670_x_at | NSUN5B    | NOL1/NOP2/Sun domain family; member 5B                                                                                                                                                                                                                                                                                            | 0.7401 | 0.0229 |
| 213671_s_at | MARS      | methionyl-tRNA synthetase                                                                                                                                                                                                                                                                                                         | 0.6745 | 0.0003 |
| 213672_at   | MARS      | methionyl-tRNA synthetase                                                                                                                                                                                                                                                                                                         | 0.7196 | 0.0087 |
| 213679_at   | TTC30A    | tetratricopeptide repeat domain 30A                                                                                                                                                                                                                                                                                               | 0.7047 | 0.0012 |
| 213688_at   | CALM1     | calmodulin 1 (phosphorylase kinase; delta)                                                                                                                                                                                                                                                                                        | 0.5413 | 0.0174 |
| 213689_x_at | FAM69A    | family with sequence similarity 69; member A                                                                                                                                                                                                                                                                                      | 1.2798 | 0.0036 |
| 213700_s_at |           | Transcribed locus                                                                                                                                                                                                                                                                                                                 | 1.4541 | 0.0001 |
| 213703_at   | LOC150759 | hypothetical protein LOC150759                                                                                                                                                                                                                                                                                                    | 1.4939 | 0.0002 |
| 213729_at   | PRPF40A   | PRP40 pre-mRNA processing factor 40 homolog A (S. cerevisiae)                                                                                                                                                                                                                                                                     | 0.5006 | 0.0059 |
| 213730_x_at | TCF3      | transcription factor 3 (E2A immunoglobulin enhancer binding factors E12/E47)                                                                                                                                                                                                                                                      | 0.7928 | 0.0001 |

|             |           |                                                                                                                                                                  |        |        |
|-------------|-----------|------------------------------------------------------------------------------------------------------------------------------------------------------------------|--------|--------|
| 213747_at   |           |                                                                                                                                                                  | 0.1541 | 0.0361 |
| 213758_at   | COX4I1    | cytochrome c oxidase subunit IV isoform 1                                                                                                                        | 1.1638 | 0.0001 |
| 213761_at   | MDM1      | Mdm4; transformed 3T3 cell double minute 1; p53 binding protein (mouse)                                                                                          | 1.6577 | 0.0001 |
| 213772_s_at | GGA2      | golgi associated; gamma adaptin ear containing; ARF binding protein 2                                                                                            | 0.887  | 0.0005 |
| 213773_x_at | NSUN5     | NOL1/NOP2/Sun domain family; member 5                                                                                                                            | 0.9433 | 0.0001 |
| 213784_at   | RABL4     | RAB; member of RAS oncogene family-like 4                                                                                                                        | 0.3381 | 0.019  |
| 213793_s_at | HOMER1    | homer homolog 1 (Drosophila)                                                                                                                                     | 2.3585 | 0.0001 |
| 213795_s_at | PTPRA     | protein tyrosine phosphatase; receptor type; A                                                                                                                   | 0.636  | 0.0158 |
| 213799_s_at | PTPRA     | protein tyrosine phosphatase; receptor type; A                                                                                                                   | 0.7126 | 0.0103 |
| 213808_at   |           | Clone 23688 mRNA sequence                                                                                                                                        | 1.1553 | 0.0166 |
| 213811_x_at | TCF3      | transcription factor 3 (E2A immunoglobulin enhancer binding factors E12/E47)                                                                                     | 0.9712 | 0.0007 |
| 213815_x_at | C19orf29  | chromosome 19 open reading frame 29                                                                                                                              | 0.4455 | 0.0011 |
| 213822_s_at | UBE3B     | ubiquitin protein ligase E3B                                                                                                                                     | 1.186  | 0.0017 |
| 213823_at   | HOXA11    | homeobox A11                                                                                                                                                     | 1.0213 | 0.001  |
| 213827_at   | SNX26     | sorting nexin 26                                                                                                                                                 | 0.6714 | 0.0034 |
| 213835_x_at | GTPBP3    | GTP binding protein 3 (mitochondrial)                                                                                                                            | 0.4209 | 0.0006 |
| 213839_at   | KIAA0500  | KIAA0500 protein                                                                                                                                                 | 0.8902 | 0.0243 |
| 213842_x_at | NSUN5C    | NOL1/NOP2/Sun domain family; member 5C                                                                                                                           | 0.6811 | 0.0102 |
| 213850_s_at | SFRS2IP   | splicing factor; arginine/serine-rich 2; interacting protein                                                                                                     | 0.8158 | 0.0157 |
| 213856_at   | CD47      | CD47 molecule                                                                                                                                                    | 0.2632 | 0.0242 |
| 213858_at   | ZNF250    | zinc finger protein 250                                                                                                                                          | 0.517  | 0.0096 |
| 213869_x_at | THY1      | Thy-1 cell surface antigen                                                                                                                                       | 1.0066 | 0.0223 |
| 213876_x_at | ZRSR2     | zinc finger (CCCH type); RNA-binding motif and serine/arginine rich 2                                                                                            | 0.7846 | 0.0299 |
| 213893_x_at | LOC441259 | PMS2 postmeiotic segregation increased 2 (S. cerevisiae)-like, postmeiotic segregation increased 2-like 5, similar to postmeiotic segregation increased 2-like 2 | 0.5548 | 0.0174 |
| 213894_at   | THSD7A    | thrombospondin; type I; domain containing 7A                                                                                                                     | 1.3008 | 0.0169 |
| 213901_x_at | RBM9      | RNA binding motif protein 9                                                                                                                                      | 0.9704 | 0.013  |
| 213906_at   | MYBL1     | v-myb myeloblastosis viral oncogene homolog (avian)-like 1                                                                                                       | 4.291  | 0      |
| 213911_s_at | H2AFZ     | H2A histone family; member Z                                                                                                                                     | 1.0089 | 0      |
| 213916_at   | ZNF20     | zinc finger protein 20                                                                                                                                           | 0.7271 | 0.0029 |
| 213922_at   | TTBK2     | tau tubulin kinase 2                                                                                                                                             | 1.0819 | 0.0004 |
| 213927_at   | MAP3K9    | mitogen-activated protein kinase kinase kinase 9                                                                                                                 | 1.3259 | 0.0011 |

|             |           |                                                                                                                      |        |        |
|-------------|-----------|----------------------------------------------------------------------------------------------------------------------|--------|--------|
| 213934_s_at | ZNF19     | zinc finger protein 19, zinc finger protein 23 (KOX 16)                                                              | 1.0122 | 0.0014 |
| 213943_at   | TWIST1    | twist homolog 1 (acrocephalosyndactyly 3; Saethre-Chotzen syndrome) (Drosophila)                                     | 2.3927 | 0      |
| 213951_s_at | PSMC3IP   | PSMC3 interacting protein                                                                                            | 0.555  | 0.0125 |
| 213954_at   | KIAA0888  | KIAA0888 protein                                                                                                     | 1.3275 | 0.0242 |
| 213959_s_at | RPGRIP1L  | RPGRIP1-like                                                                                                         | 0.9636 | 0.0015 |
| 213971_s_at | SUZ12     | suppressor of zeste 12 homolog (Drosophila), suppressor of zeste 12 homolog pseudogene                               | 0.8674 | 0.0024 |
| 213973_at   | RRBP1     | ribosome binding protein 1 homolog 180kDa (dog)                                                                      | 0.27   | 0.0311 |
| 213986_s_at | C19orf6   | chromosome 19 open reading frame 6                                                                                   | 1.8613 | 0.0001 |
| 213998_s_at | DDX17     | DEAD (Asp-Glu-Ala-Asp) box polypeptide 17                                                                            | 0.9418 | 0.0202 |
| 214007_s_at | TWF1      | twinfilin; actin-binding protein; homolog 1 (Drosophila)                                                             | 1.5667 | 0.0045 |
| 214017_s_at | DHX34     | DEAH (Asp-Glu-Ala-His) box polypeptide 34                                                                            | 0.3842 | 0.0117 |
| 214035_x_at | LOC399491 | LOC399491 protein                                                                                                    | 0.6568 | 0.0008 |
| 214051_at   | MGC39900  | hypothetical protein MGC39900                                                                                        | 1.6577 | 0.0015 |
| 214055_x_at | BAT2D1    | BAT2 domain containing 1                                                                                             | 0.8212 | 0.027  |
| 214060_at   | SSBP1     | single-stranded DNA binding protein 1                                                                                | 1.0575 | 0.0006 |
| 214061_at   | WDR67     | WD repeat domain 67                                                                                                  | 1.3156 | 0.0002 |
| 214079_at   | DHRS2     | dehydrogenase/reductase (SDR family) member 2                                                                        | 2.846  | 0.0021 |
| 214080_x_at | PRKCSH    | protein kinase C substrate 80K-H                                                                                     | 0.7233 | 0.0002 |
| 214086_s_at | PARP2     | poly (ADP-ribose) polymerase family; member 2                                                                        | 0.8696 | 0.004  |
| 214092_x_at | SFRS14    | splicing factor; arginine/serine-rich 14                                                                             | 0.487  | 0.0008 |
| 214094_at   | FUBP1     | far upstream element (FUSE) binding protein 1                                                                        | 0.3846 | 0.0112 |
| 214095_at   | SHMT2     | serine hydroxymethyltransferase 2 (mitochondrial)                                                                    | 1.6625 | 0.0008 |
| 214096_s_at | SHMT2     | serine hydroxymethyltransferase 2 (mitochondrial)                                                                    | 1.1776 | 0.0002 |
| 214099_s_at | LOC727927 | phosphodiesterase 4D interacting protein (myomegalin), similar to phosphodiesterase 4D interacting protein isoform 2 | 0.2854 | 0.0061 |
| 214100_x_at | NSUN5B    | NOL1/NOP2/Sun domain family; member 5B                                                                               | 0.7755 | 0.0083 |
| 214114_x_at | FASTK     | Fas-activated serine/threonine kinase                                                                                | 0.6437 | 0.0002 |
| 214129_at   | LOC727942 | similar to phosphodiesterase 4D interacting protein isoform 2                                                        | 0.9809 | 0.0045 |
| 214130_s_at | LOC727942 | phosphodiesterase 4D interacting protein (myomegalin), similar to phosphodiesterase 4D interacting protein isoform 2 | 0.7687 | 0.0024 |
| 214132_at   | ATP5C1    | ATP synthase; H+ transporting; mitochondrial F1 complex; gamma polypeptide 1                                         | 2.0047 | 0      |
| 214148_at   |           | Clone 23641 mRNA sequence                                                                                            | 0.4051 | 0.0017 |

|             |           |                                                                                                                                |        |        |
|-------------|-----------|--------------------------------------------------------------------------------------------------------------------------------|--------|--------|
| 214156_at   | MYRIP     | myosin VIIA and Rab interacting protein                                                                                        | 1.1488 | 0.0183 |
| 214163_at   | C1orf41   | chromosome 1 open reading frame 41                                                                                             | 0.9133 | 0.0039 |
| 214164_x_at | CA12      | carbonic anhydrase XII                                                                                                         | 0.9267 | 0.0308 |
| 214190_x_at | GGA2      | golgi associated; gamma adaptin ear containing; ARF binding protein 2                                                          | 0.9614 | 0.0034 |
| 214193_s_at | C1orf107  | chromosome 1 open reading frame 107                                                                                            | 0.5609 | 0.029  |
| 214209_s_at | ABCB9     | ATP-binding cassette; sub-family B (MDR/TAP); member 9                                                                         | 0.651  | 0.01   |
| 214221_at   | ALMS1     | Alstrom syndrome 1                                                                                                             | 0.5408 | 0.0368 |
| 214225_at   |           |                                                                                                                                | 0.375  | 0.0148 |
| 214226_at   | POL3S     | polyserase 3                                                                                                                   | 0.5463 | 0.0126 |
| 214235_at   | CYP3A5    | cytochrome P450; family 3; subfamily A; polypeptide 5                                                                          | 1.9819 | 0.0244 |
| 214241_at   | NDUFB8    | NADH dehydrogenase (ubiquinone) 1 beta subcomplex; 8; 19kDa                                                                    | 0.8385 | 0.006  |
| 214245_at   | RPS14     | ribosomal protein S14                                                                                                          | 0.5039 | 0.0002 |
| 214249_at   | TRIM2     | tripartite motif-containing 2                                                                                                  | 0.2747 | 0.0094 |
| 214250_at   | NUMA1     | nuclear mitotic apparatus protein 1                                                                                            | 0.5179 | 0.0074 |
| 214260_at   | COPS8     | COP9 constitutive photomorphogenic homolog subunit 8 (Arabidopsis)                                                             | 0.3369 | 0.01   |
| 214264_s_at | C14orf143 | chromosome 14 open reading frame 143                                                                                           | 0.8135 | 0.0067 |
| 214270_s_at | MAPRE3    | microtubule-associated protein; RP/EB family; member 3                                                                         | 0.4631 | 0.0484 |
| 214280_x_at | HNRNPA1   | heterogeneous nuclear ribonucleoprotein A1                                                                                     | 0.5804 | 0.0015 |
| 214297_at   | CSPG4     | chondroitin sulfate proteoglycan 4                                                                                             | 0.201  | 0.0472 |
| 214299_at   | TOP3A     | topoisomerase (DNA) III alpha                                                                                                  | 0.1881 | 0.0289 |
| 214318_s_at | FRY       | furry homolog (Drosophila)                                                                                                     | 0.3559 | 0.0082 |
| 214319_at   | FRY       | furry homolog (Drosophila)                                                                                                     | 0.3585 | 0.007  |
| 214335_at   | RPL18     | ribosomal protein L18                                                                                                          | 0.2598 | 0.0298 |
| 214336_s_at | COPA      | coatmer protein complex; subunit alpha                                                                                         | 0.6989 | 0.0403 |
| 214352_s_at | KRAS      | v-Ki-ras2 Kirsten rat sarcoma viral oncogene homolog                                                                           | 1.1923 | 0      |
| 214374_s_at | PPFIBP1   | PTPRF interacting protein; binding protein 1 (liprin beta 1)                                                                   | 0.8277 | 0.0265 |
| 214375_at   | LOC729222 | PTPRF interacting protein; binding protein 1 (liprin beta 1), similar to PTPRF interacting protein binding protein 1 isoform 1 | 1.1001 | 0.0377 |
| 214389_at   |           | MRNA; cDNA DKFZp564G223 (from clone DKFZp564G223)                                                                              | 0.1027 | 0.0232 |
| 214415_at   | PLGLB1    | plasminogen-like B1, plasminogen-like B2                                                                                       | 0.3707 | 0.0267 |
| 214426_x_at | CHAF1A    | chromatin assembly factor 1; subunit A (p150)                                                                                  | 1.1386 | 0      |
| 214430_at   | GLA       | galactosidase; alpha                                                                                                           | 0.536  | 0.0307 |
| 214436_at   | FBXL2     | F-box and leucine-rich repeat protein 2                                                                                        | 0.6398 | 0.0474 |



|             |          |                                                                                                                                                                                                                                                                                                                                                                                                                                                                                   |        |        |
|-------------|----------|-----------------------------------------------------------------------------------------------------------------------------------------------------------------------------------------------------------------------------------------------------------------------------------------------------------------------------------------------------------------------------------------------------------------------------------------------------------------------------------|--------|--------|
| 214437_s_at | SHMT2    | serine hydroxymethyltransferase 2 (mitochondrial)                                                                                                                                                                                                                                                                                                                                                                                                                                 | 1.709  | 0.0003 |
| 214473_x_at | PMS2L3   | postmeiotic segregation increased 2-like 3                                                                                                                                                                                                                                                                                                                                                                                                                                        | 0.6747 | 0.0013 |
| 214474_at   | PRKAB2   | protein kinase; AMP-activated; beta 2 non-catalytic subunit                                                                                                                                                                                                                                                                                                                                                                                                                       | 0.8349 | 0.017  |
| 214483_s_at | ARFIP1   | ADP-ribosylation factor interacting protein 1 (arfaptin 1)                                                                                                                                                                                                                                                                                                                                                                                                                        | 0.83   | 0.015  |
| 214484_s_at | OPRS1    | opioid receptor; sigma 1                                                                                                                                                                                                                                                                                                                                                                                                                                                          | 0.5678 | 0.0254 |
| 214496_x_at | MYST4    | MYST histone acetyltransferase (monocytic leukemia) 4                                                                                                                                                                                                                                                                                                                                                                                                                             | 0.6302 | 0.0048 |
| 214500_at   | H2AFY    | H2A histone family; member Y                                                                                                                                                                                                                                                                                                                                                                                                                                                      | 1.3954 | 0.0057 |
| 214501_s_at | H2AFY    | H2A histone family; member Y                                                                                                                                                                                                                                                                                                                                                                                                                                                      | 0.6444 | 0.0023 |
| 214507_s_at | EXOSC2   | exosome component 2                                                                                                                                                                                                                                                                                                                                                                                                                                                               | 0.7678 | 0.0262 |
| 214526_x_at | PMS2L1   | postmeiotic segregation increased 2-like 1                                                                                                                                                                                                                                                                                                                                                                                                                                        | 0.4609 | 0.0336 |
| 214550_s_at | TNPO3    | transportin 3                                                                                                                                                                                                                                                                                                                                                                                                                                                                     | 1.235  | 0.0003 |
| 214563_at   | PCDHGC3  | protocadherin gamma subfamily C; 3                                                                                                                                                                                                                                                                                                                                                                                                                                                | 0.1179 | 0.0299 |
| 214577_at   | MAP1B    | microtubule-associated protein 1B                                                                                                                                                                                                                                                                                                                                                                                                                                                 | 1.1396 | 0.0078 |
| 214588_s_at | MFAP3    | Microfibrillar-associated protein 3                                                                                                                                                                                                                                                                                                                                                                                                                                               | 0.3033 | 0.0179 |
| 214594_x_at | ATP8B1   | ATPase; Class I; type 8B; member 1                                                                                                                                                                                                                                                                                                                                                                                                                                                | 0.574  | 0.0108 |
| 214605_x_at | GPR1     | G protein-coupled receptor 1                                                                                                                                                                                                                                                                                                                                                                                                                                                      | 0.6473 | 0.0246 |
| 214631_at   | ZBTB33   | zinc finger and BTB domain containing 33                                                                                                                                                                                                                                                                                                                                                                                                                                          | 0.2207 | 0.0042 |
| 214650_x_at | MOG      | myelin oligodendrocyte glycoprotein                                                                                                                                                                                                                                                                                                                                                                                                                                               | 0.1232 | 0.01   |
| 214668_at   | C13orf1  | chromosome 13 open reading frame 1                                                                                                                                                                                                                                                                                                                                                                                                                                                | 0.7248 | 0.0072 |
| 214686_at   | ZNF266   | zinc finger protein 266                                                                                                                                                                                                                                                                                                                                                                                                                                                           | 1.0108 | 0.0003 |
| 214687_x_at | ALDOA    | aldolase A; fructose-bisphosphate                                                                                                                                                                                                                                                                                                                                                                                                                                                 | 0.3565 | 0.0003 |
| 214691_x_at | FAM63B   | family with sequence similarity 63; member B                                                                                                                                                                                                                                                                                                                                                                                                                                      | 0.5197 | 0.0257 |
| 214692_s_at | JRK      | jerky homolog (mouse)                                                                                                                                                                                                                                                                                                                                                                                                                                                             | 0.4291 | 0.0122 |
| 214693_x_at | KIAA1245 | KIAA1245, hypothetical protein LOC728980, hypothetical protein LOC730476, neuroblastoma breakpoint family; member 1, neuroblastoma breakpoint family; member 10, neuroblastoma breakpoint family; member 11, neuroblastoma breakpoint family; member 14, neuroblastoma breakpoint family; member 15, neuroblastoma breakpoint family; member 16, neuroblastoma breakpoint family; member 20, neuroblastoma breakpoint family; member 8, neuroblastoma breakpoint family; member 9 | 0.6856 | 0.0265 |
| 214697_s_at | ROD1     | ROD1 regulator of differentiation 1 (S. pombe)                                                                                                                                                                                                                                                                                                                                                                                                                                    | 1.2131 | 0.0014 |
| 214699_x_at | WIPI2    | WD repeat domain; phosphoinositide interacting 2                                                                                                                                                                                                                                                                                                                                                                                                                                  | 0.1586 | 0.046  |
| 214700_x_at | RIF1     | RAP1 interacting factor homolog (yeast)                                                                                                                                                                                                                                                                                                                                                                                                                                           | 0.7013 | 0.0223 |

|             |           |                                                             |        |        |
|-------------|-----------|-------------------------------------------------------------|--------|--------|
| 214707_x_at | ALMS1     | Alstrom syndrome 1                                          | 0.4895 | 0.0012 |
| 214710_s_at | CCNB1     | cyclin B1                                                   | 4.5789 | 0      |
| 214711_at   | 15E1.2    | hypothetical protein LOC283459                              | 1.0647 | 0.028  |
| 214718_at   | GATAD1    | GATA zinc finger domain containing 1                        | 0.6271 | 0.0129 |
| 214722_at   | NOTCH2NL  | Notch homolog 2 (Drosophila) N-terminal like                | 0.7927 | 0.0124 |
| 214723_x_at | KIAA1641  | KIAA1641                                                    | 1.0407 | 0.0011 |
| 214727_at   | BRCA2     | breast cancer 2; early onset                                | 0.9579 | 0.0025 |
| 214730_s_at | GLG1      | golgi apparatus protein 1                                   | 1.0545 | 0      |
| 214731_at   | CTTNBP2NL | CTTNBP2 N-terminal like                                     | 0.728  | 0.0317 |
| 214732_at   | SP1       | Sp1 transcription factor                                    | 0.1911 | 0.0498 |
| 214734_at   | EXPH5     | exophilin 5                                                 | 0.4459 | 0.0341 |
| 214738_s_at | NEK9      | NIMA (never in mitosis gene a)- related kinase 9            | 0.4648 | 0.0332 |
| 214743_at   | CUTL1     | cut-like 1; CCAAT displacement protein (Drosophila)         | 0.5654 | 0.035  |
| 214753_at   | PFAAP5    | Phosphonoformate immuno-associated protein 5                | 0.6795 | 0.0468 |
| 214755_at   | UAP1L1    | UDP-N-acetylglucosamine pyrophosphorylase 1-like 1          | 1.1343 | 0.0072 |
| 214757_at   |           | CDNA clone IMAGE:3456494                                    | 0.5414 | 0.0006 |
| 214760_at   | ZNF337    | zinc finger protein 337                                     | 1.2189 | 0      |
| 214761_at   | ZNF423    | zinc finger protein 423                                     | 1.3457 | 0.0319 |
| 214769_at   | CLCN4     | chloride channel 4                                          | 1.9361 | 0.0002 |
| 214772_at   | C11orf41  | chromosome 11 open reading frame 41                         | 0.404  | 0.0346 |
| 214773_x_at | TIPRL     | TIP41; TOR signaling pathway regulator-like (S. cerevisiae) | 0.4505 | 0.0017 |
| 214780_s_at | MYO9B     | myosin IXB                                                  | 0.4929 | 0.0076 |
| 214782_at   | CTTN      | cortactin                                                   | 0.7553 | 0.0155 |
| 214784_x_at | XPO6      | exportin 6                                                  | 0.5408 | 0      |
| 214795_at   | ZMYND8    | zinc finger; MYND-type containing 8                         | 0.5155 | 0.0086 |
| 214804_at   |           |                                                             | 1.2936 | 0.0036 |
| 214806_at   | BICD1     | bicaudal D homolog 1 (Drosophila)                           | 0.7635 | 0.0049 |
| 214813_at   | ZNF75     | zinc finger protein 75 (D8C6)                               | 0.6714 | 0.021  |
| 214815_at   | TRIM33    | Tripartite motif-containing 33                              | 0.3941 | 0.0092 |
| 214816_x_at | C19orf40  | chromosome 19 open reading frame 40                         | 0.512  | 0.0003 |
| 214820_at   | BRWD1     | bromodomain and WD repeat domain containing 1               | 0.7874 | 0.0379 |
| 214831_at   | ELK4      | ELK4; ETS-domain protein (SRF accessory protein 1)          | 0.3329 | 0.0011 |
| 214845_s_at | CALU      | calumenin                                                   | 2.1771 | 0.0002 |
| 214850_at   | SMA4      | Glucuronidase; beta pseudogene                              | 1.2493 | 0.0009 |
| 214861_at   | JMJD2C    | jumonji domain containing 2C                                | 0.7161 | 0.0093 |
| 214862_x_at |           | MRNA; cDNA DKFZp564G1162 (from clone DKFZp564G1162)         | 0.3882 | 0.0443 |
| 214869_x_at | GAPVD1    | GTPase activating protein and VPS9 domains 1                | 1.1409 | 0.0069 |

|             |              |                                                                                                                                                                                         |        |        |
|-------------|--------------|-----------------------------------------------------------------------------------------------------------------------------------------------------------------------------------------|--------|--------|
| 214870_x_at | LOC339047    | hypothetical protein LOC339047, nuclear pore complex interacting protein, similar to nuclear pore complex interacting protein                                                           | 0.6335 | 0.0016 |
| 214871_x_at |              | CDNA clone IMAGE:3347954                                                                                                                                                                | 0.2287 | 0.0144 |
| 214875_x_at | APLP2        | amyloid beta (A4) precursor-like protein 2                                                                                                                                              | 1.0101 | 0.0013 |
| 214878_at   | ZNF37A       | zinc finger protein 37A, zinc finger protein 37B                                                                                                                                        | 0.4509 | 0.0181 |
| 214887_at   | CG018        | Hypothetical gene CG018                                                                                                                                                                 | 0.1293 | 0.0028 |
| 214895_s_at | ADAM10       | ADAM metallopeptidase domain 10                                                                                                                                                         | 1.3076 | 0.0051 |
| 214899_at   | ZNF780B      | zinc finger protein 780B                                                                                                                                                                | 0.1672 | 0.0042 |
| 214900_at   | ZKSCAN1      | zinc finger with KRAB and SCAN domains 1                                                                                                                                                | 0.4447 | 0.009  |
| 214902_x_at |              | MRNA; cDNA DKFZp586A061 (from clone DKFZp586A061)                                                                                                                                       | 0.3063 | 0.0445 |
| 214904_at   | ZNF41        | zinc finger protein 41                                                                                                                                                                  | 0.1616 | 0.0499 |
| 214908_s_at | TRRAP        | transformation/transcription domain-associated protein                                                                                                                                  | 1.3906 | 0.0005 |
| 214913_at   | ADAMTS3      | ADAM metallopeptidase with thrombospondin type 1 motif; 3                                                                                                                               | 1.5569 | 0.0034 |
| 214920_at   | THSD7A       | thrombospondin; type I; domain containing 7A                                                                                                                                            | 1.2722 | 0.0128 |
| 214925_s_at | SPTAN1       | spectrin; alpha; non-erythrocytic 1 (alpha-fodrin)                                                                                                                                      | 0.5905 | 0.0409 |
| 214931_s_at | SRPK2        | SFRS protein kinase 2                                                                                                                                                                   | 0.6956 | 0.0036 |
| 214948_s_at | TMF1         | TATA element modulatory factor 1                                                                                                                                                        | 0.8836 | 0.015  |
| 214949_at   |              | CDNA FLJ31919 fis; clone NT2RP7004964                                                                                                                                                   | 1.0894 | 0.001  |
| 214962_s_at | NUP160       | nucleoporin 160kDa                                                                                                                                                                      | 0.3617 | 0.0177 |
| 214968_at   | DDX51        | DEAD (Asp-Glu-Ala-Asp) box polypeptide 51                                                                                                                                               | 0.1764 | 0.0333 |
| 214972_at   | MGEA5        | Meningioma expressed antigen 5 (hyaluronidase)                                                                                                                                          | 0.5175 | 0.0007 |
| 214975_s_at | MTMR1        | myotubularin related protein 1                                                                                                                                                          | 1.0661 | 0.0049 |
| 214984_at   | DKFZp547E087 | PI-3-kinase-related kinase SMG-1, PI-3-kinase-related kinase SMG-1 pseudogene, hypothetical gene LOC283846, hypothetical protein LOC440345, similar to PI-3-kinase-related kinase SMG-1 | 0.2751 | 0.0008 |
| 214989_x_at |              | CDNA FLJ11875 fis; clone HEMBA1007078                                                                                                                                                   | 0.293  | 0.02   |
| 215004_s_at | SF4          | splicing factor 4                                                                                                                                                                       | 0.8514 | 0.0019 |
| 215006_at   |              | CDNA FLJ13754 fis; clone PLACE3000362                                                                                                                                                   | 0.6703 | 0      |
| 215009_s_at | SEC31A       | SEC31 homolog A (S. cerevisiae)                                                                                                                                                         | 0.5735 | 0.0404 |
| 215011_at   | SNHG3        | small nucleolar RNA host gene (non-protein coding) 3                                                                                                                                    | 0.5156 | 0.0428 |
| 215017_s_at | FNBP1L       | formin binding protein 1-like                                                                                                                                                           | 1.1401 | 0.0003 |
| 215018_at   | KIAA1731     | KIAA1731                                                                                                                                                                                | 0.2961 | 0.0006 |
| 215023_s_at | PEX1         | peroxisome biogenesis factor 1                                                                                                                                                          | 0.9755 | 0.0046 |

|             |           |                                                                                                                                             |        |        |
|-------------|-----------|---------------------------------------------------------------------------------------------------------------------------------------------|--------|--------|
| 215024_at   | ASNS      | MGC72080 pseudogene, asparagine synthetase, chromosome 7 open reading frame 28A, chromosome 7 open reading frame 28B, similar to CG14980-PB | 0.4657 | 0.0356 |
| 215029_at   |           |                                                                                                                                             | 0.6486 | 0.0215 |
| 215031_x_at | RNF126    | ring finger protein 126                                                                                                                     | 0.3995 | 0.0015 |
| 215037_s_at | BCL2L1    | BCL2-like 1                                                                                                                                 | 0.7478 | 0.0058 |
| 215043_s_at | SMA4      | glucuronidase; beta pseudogene                                                                                                              | 0.7571 | 0.0043 |
| 215063_x_at | LRRC40    | leucine rich repeat containing 40                                                                                                           | 0.2459 | 0.0009 |
| 215066_at   | PTPRF     | protein tyrosine phosphatase; receptor type; F                                                                                              | 0.2582 | 0.0191 |
| 215069_at   | NMT2      | N-myristoyltransferase 2                                                                                                                    | 0.3039 | 0.0227 |
| 215070_x_at | RABGAP1   | RAB GTPase activating protein 1                                                                                                             | 0.3861 | 0.0061 |
| 215072_x_at | C10orf137 | chromosome 10 open reading frame 137                                                                                                        | 0.1554 | 0.0316 |
| 215083_at   |           | MRNA; cDNA DKFZp564F133 (from clone DKFZp564F133)                                                                                           | 0.8889 | 0.0049 |
| 215092_s_at | NFAT5     | nuclear factor of activated T-cells 5; tonicity-responsive                                                                                  | 0.8947 | 0.0179 |
| 215095_at   | ESD       | Esterase D/formylglutathione hydrolase                                                                                                      | 0.7673 | 0.0047 |
| 215102_at   | DPY19L1P1 | dpy-19-like 1 pseudogene 1 (C. elegans)                                                                                                     | 0.1984 | 0.003  |
| 215123_at   | LOC23117  | KIAA0220-like protein, hypothetical protein LOC339047, similar to Protein KIAA0220, similar to nuclear pore complex interacting protein     | 1.981  | 0      |
| 215124_at   | ZNF550    | zinc finger protein 550                                                                                                                     | 0.2463 | 0.0045 |
| 215143_at   | DPY19L2P2 | dpy-19-like 2 pseudogene 2 (C. elegans)                                                                                                     | 2.7312 | 0      |
| 215148_s_at | APBA3     | amyloid beta (A4) precursor protein-binding; family A; member 3 (X11-like 2)                                                                | 0.767  | 0.0004 |
| 215155_at   | HEXA      | Hexosaminidase A (alpha polypeptide)                                                                                                        | 0.4003 | 0.0145 |
| 215156_at   | WDR61     | WD repeat domain 61                                                                                                                         | 0.5836 | 0.017  |
| 215157_x_at | PABPC1    | poly(A) binding protein; cytoplasmic 1                                                                                                      | 0.2455 | 0.0085 |
| 215170_s_at | CEP152    | centrosomal protein 152kDa                                                                                                                  | 0.5384 | 0.0315 |
| 215177_s_at | ITGA6     | integrin; alpha 6                                                                                                                           | 0.8507 | 0.0167 |
| 215179_x_at | PGF       | Placental growth factor; vascular endothelial growth factor-related protein                                                                 | 0.4083 | 0.0024 |
| 215197_at   |           | CDNA FLJ13776 fis; clone PLACE4000387                                                                                                       | 0.1281 | 0.0374 |
| 215201_at   | REPS1     | RALBP1 associated Eps domain containing 1                                                                                                   | 0.5501 | 0.0169 |
| 215203_at   | GOLGA4    | golgi autoantigen; golgin subfamily a; 4                                                                                                    | 1.0816 | 0.0156 |
| 215208_x_at | RPL35A    | Ribosomal protein L35a                                                                                                                      | 0.2205 | 0.0178 |
| 215215_s_at | LOC81691  | exonuclease NEF-sp                                                                                                                          | 0.8772 | 0.0026 |
| 215218_s_at | WDR62     | WD repeat domain 62                                                                                                                         | 0.1487 | 0.0359 |
| 215236_s_at | PICALM    | phosphatidylinositol binding clathrin assembly protein                                                                                      | 0.9433 | 0.0336 |

|             |               |                                                                                                           |        |        |
|-------------|---------------|-----------------------------------------------------------------------------------------------------------|--------|--------|
| 215239_x_at | ZNF273        | zinc finger protein 273                                                                                   | 1.1445 | 0.0042 |
| 215249_at   | RPL35A        | ribosomal protein L35a                                                                                    | 0.2943 | 0.0081 |
| 215252_at   |               | CDNA: FLJ21350 fis; clone COL02751                                                                        | 0.3673 | 0.0396 |
| 215262_at   |               | Clone 24629 mRNA sequence                                                                                 | 0.262  | 0.0008 |
| 215280_s_at | PPFIA3        | protein tyrosine phosphatase; receptor type; f polypeptide (PTPRF); interacting protein (liprin); alpha 3 | 0.6618 | 0      |
| 215282_at   | ANAPC13       | anaphase promoting complex subunit 13                                                                     | 0.1355 | 0.0082 |
| 215286_s_at | PHTF2         | putative homeodomain transcription factor 2                                                               | 0.8481 | 0.0004 |
| 215310_at   | APC           | adenomatosis polyposis coli                                                                               | 0.7441 | 0.0007 |
| 215316_at   |               | MRNA; cDNA DKFZp434M091 (from clone DKFZp434M091)                                                         | 0.534  | 0.0482 |
| 215318_at   | CG012         | hypothetical gene CG012                                                                                   | 0.5882 | 0.0057 |
| 215338_s_at | NKTR          | natural killer-tumor recognition sequence                                                                 | 0.9163 | 0.0015 |
| 215339_at   | NKTR          | natural killer-tumor recognition sequence                                                                 | 0.2865 | 0.0058 |
| 215351_at   | RTCD1         | RNA terminal phosphate cyclase domain 1                                                                   | 0.4025 | 0.0047 |
| 215356_at   | ECAT8         | ES cell associated transcript 8                                                                           | 1.5191 | 0.0495 |
| 215363_x_at | FOLH1         | folate hydrolase (prostate-specific membrane antigen) 1                                                   | 1.3702 | 0.0034 |
| 215366_at   | SNX13         | sorting nexin 13                                                                                          | 0.1853 | 0.008  |
| 215371_at   | MED27         | mediator complex subunit 27                                                                               | 0.2313 | 0.0137 |
| 215372_x_at |               | CDNA FLJ12002 fis; clone HEMBB1001536                                                                     | 0.2857 | 0.0134 |
| 215373_x_at | FLJ12151      | hypothetical protein FLJ12151                                                                             | 0.3885 | 0.0118 |
| 215376_at   |               | CDNA FLJ12295 fis; clone MAMMA1001818                                                                     | 0.3995 | 0.0005 |
| 215378_at   |               | CDNA FLJ14151 fis; clone MAMMA1003031                                                                     | 0.2451 | 0.0398 |
| 215380_s_at | C7orf24       | chromosome 7 open reading frame 24                                                                        | 0.5164 | 0.0034 |
| 215387_x_at |               | CDNA FLJ11917 fis; clone HEMBB1000218                                                                     | 0.4423 | 0.0271 |
| 215404_x_at | FGFR1         | fibroblast growth factor receptor 1 (fms-related tyrosine kinase 2; Pfeiffer syndrome)                    | 0.3614 | 0.005  |
| 215412_x_at | PMS2L2        | postmeiotic segregation increased 2-like 2                                                                | 0.7198 | 0.0002 |
| 215434_x_at | NBPF1         | neuroblastoma breakpoint family; member 1, neuroblastoma breakpoint family; member 10                     | 0.8959 | 0.045  |
| 215435_at   |               | CDNA FLJ11921 fis; clone HEMBB1000318                                                                     | 0.7212 | 0.0397 |
| 215437_x_at | BAZ2A         | bromodomain adjacent to zinc finger domain; 2A                                                            | 0.2138 | 0      |
| 215441_at   | LOC730453     | hypothetical protein LOC730453                                                                            | 0.894  | 0.0343 |
| 215457_at   |               | Clone 24438 mRNA sequence                                                                                 | 0.2183 | 0.0198 |
| 215467_x_at | LOC647070     | hypothetical LOC647070                                                                                    | 0.3385 | 0.0002 |
| 215470_at   | DKFZP686M0199 | general transcription factor IIH; polypeptide 2; 44kDa-like                                               | 2.5384 | 0      |

|             |           |                                                                          |        |        |
|-------------|-----------|--------------------------------------------------------------------------|--------|--------|
| 215474_at   |           | CDNA FLJ12032 fis; clone HEMBB1001880                                    | 0.3013 | 0.0008 |
| 215483_at   | AKAP9     | A kinase (PRKA) anchor protein (yotiao) 9                                | 1.1577 | 0.0023 |
| 215501_s_at | DUSP10    | dual specificity phosphatase 10                                          | 0.5752 | 0.0429 |
| 215504_x_at |           | Clone 25061 mRNA sequence                                                | 0.3847 | 0.0007 |
| 215508_at   | BUB1      | BUB1 budding uninhibited by benzimidazoles 1 homolog (yeast)             | 0.4075 | 0.0025 |
| 215509_s_at | BUB1      | BUB1 budding uninhibited by benzimidazoles 1 homolog (yeast)             | 1.1981 | 0.0063 |
| 215512_at   | 6-Mar     | membrane-associated ring finger (C3HC4) 6                                | 0.5932 | 0.0118 |
| 215521_at   | PHC3      | polyhomeotic homolog 3 (Drosophila)                                      | 0.5149 | 0.0026 |
| 215529_x_at | DIP2A     | DIP2 disco-interacting protein 2 homolog A (Drosophila)                  | 0.3664 | 0.02   |
| 215532_x_at | ZNF492    | zinc finger protein 492                                                  | 0.3204 | 0.0226 |
| 215544_s_at | UBOX5     | U-box domain containing 5                                                | 0.5219 | 0.0188 |
| 215553_x_at |           | CDNA FLJ14253 fis; clone OVARC1001376                                    | 0.4044 | 0.0009 |
| 215558_at   | UBR2      | Ubiquitin protein ligase E3 component n-recogin 2                        | 0.4103 | 0.0083 |
| 215567_at   | FCF1      | FCF1 small subunit (SSU) processome component homolog (S. cerevisiae)    | 0.5746 | 0.0316 |
| 215570_s_at | ZNF780A   | zinc finger protein 780A, zinc finger protein 780B                       | 0.6836 | 0.0223 |
| 215578_at   |           | CDNA FLJ11662 fis; clone HEMBA1004629                                    | 0.479  | 0.0312 |
| 215581_s_at | MCM3AP    | minichromosome maintenance complex component 3 associated protein        | 0.4331 | 0.0083 |
| 215586_at   |           | CDNA FLJ14111 fis; clone MAMMA1001630                                    | 0.7104 | 0.0029 |
| 215587_x_at |           | CDNA FLJ13829 fis; clone THYRO1000625                                    | 0.2409 | 0.0386 |
| 215591_at   | SATB2     | SATB homeobox 2                                                          | 0.2479 | 0.0031 |
| 215595_x_at |           | CDNA FLJ13856 fis; clone THYRO1000988                                    | 0.1542 | 0.0354 |
| 215597_x_at |           | CDNA FLJ11353 fis; clone HEMBA1000042                                    | 0.1855 | 0.0475 |
| 215599_at   | LOC730390 | glucuronidase; beta pseudogene, similar to SMA4                          | 1.9289 | 0      |
| 215600_x_at | FBXW12    | F-box and WD repeat domain containing 12                                 | 0.4906 | 0.006  |
| 215604_x_at |           | CDNA FLJ13721 fis; clone PLACE2000450                                    | 0.2956 | 0.0299 |
| 215605_at   | NCOA2     | Nuclear receptor coactivator 2                                           | 0.7605 | 0.0096 |
| 215611_at   | TCF12     | transcription factor 12 (HTF4; helix-loop-helix transcription factors 4) | 0.3669 | 0.041  |
| 215615_x_at |           | CDNA FLJ14152 fis; clone MAMMA1003089                                    | 0.2071 | 0.0018 |
| 215623_x_at | SMC4      | structural maintenance of chromosomes 4                                  | 0.4498 | 0.0035 |
| 215627_at   |           | CDNA FLJ13453 fis; clone PLACE1003205                                    | 0.1507 | 0.0005 |
| 215628_x_at |           | MRNA; cDNA DKFZp564M193 (from clone DKFZp564M193)                        | 0.2388 | 0.0316 |

|             |           |                                                                                                                                                                                                                                                                                                          |        |        |
|-------------|-----------|----------------------------------------------------------------------------------------------------------------------------------------------------------------------------------------------------------------------------------------------------------------------------------------------------------|--------|--------|
| 215629_s_at | DLEU2     | deleted in lymphocytic leukemia 2-like, deleted in lymphocytic leukemia; 2                                                                                                                                                                                                                               | 1.9049 | 0      |
| 215648_at   |           | CDNA FLJ11461 fis; clone HEMBA1001570                                                                                                                                                                                                                                                                    | 0.5832 | 0      |
| 215650_at   |           | CDNA FLJ11552 fis; clone HEMBA1003021                                                                                                                                                                                                                                                                    | 0.1322 | 0.0368 |
| 215655_at   | GRIK2     | Glutamate receptor; ionotropic; kainate 2                                                                                                                                                                                                                                                                | 0.1132 | 0.0056 |
| 215667_x_at | LOC441259 | PMS2 postmeiotic segregation increased 2 (S. cerevisiae)-like, similar to postmeiotic segregation increased 2-like 2                                                                                                                                                                                     | 0.7719 | 0.0008 |
| 215672_s_at | KIAA0828  | adenosylhomocysteinase 3                                                                                                                                                                                                                                                                                 | 0.6213 | 0.0022 |
| 215674_at   | KIAA1659  | KIAA1659 protein                                                                                                                                                                                                                                                                                         | 0.1292 | 0.0243 |
| 215694_at   | SPATA5L1  | spermatogenesis associated 5-like 1                                                                                                                                                                                                                                                                      | 0.31   | 0.0122 |
| 215708_s_at | PRIM2     | primase; DNA; polypeptide 2 (58kDa)                                                                                                                                                                                                                                                                      | 0.8661 | 0.0062 |
| 215711_s_at | WEE1      | WEE1 homolog (S. pombe)                                                                                                                                                                                                                                                                                  | 0.7244 | 0.018  |
| 215716_s_at | ATP2B1    | ATPase; Ca <sup>++</sup> transporting; plasma membrane 1                                                                                                                                                                                                                                                 | 1.1505 | 0.0001 |
| 215728_s_at | ACOT7     | acyl-CoA thioesterase 7                                                                                                                                                                                                                                                                                  | 0.5698 | 0.046  |
| 215731_s_at | MPHOSPH9  | M-phase phosphoprotein 9                                                                                                                                                                                                                                                                                 | 1.156  | 0.0096 |
| 215743_at   | NMT2      | N-myristoyltransferase 2                                                                                                                                                                                                                                                                                 | 0.462  | 0.0076 |
| 215747_s_at | RCC1      | regulator of chromosome condensation 1                                                                                                                                                                                                                                                                   | 0.2976 | 0.0178 |
| 215758_x_at | ZNF93     | zinc finger protein 93                                                                                                                                                                                                                                                                                   | 1.1828 | 0.0006 |
| 215761_at   | DMXL2     | Dmx-like 2                                                                                                                                                                                                                                                                                               | 0.3983 | 0.0187 |
| 215766_at   | GSTA1     | Glutathione S-transferase A1                                                                                                                                                                                                                                                                             | 0.3139 | 0.0137 |
| 215773_x_at | PARP2     | poly (ADP-ribose) polymerase family; member 2                                                                                                                                                                                                                                                            | 0.7643 | 0.0066 |
| 215786_at   |           | CDNA FLJ12108 fis; clone MAMMA1000009                                                                                                                                                                                                                                                                    | 0.8153 | 0.0254 |
| 215791_at   |           | Chromosome 21q22.1 anonymous mRNA sequence                                                                                                                                                                                                                                                               | 0.6094 | 0.0448 |
| 215812_s_at | LOC653562 | similar to Sodium- and chloride-dependent creatine transporter 1 (CT1) (Creatine transporter 1) (Solute carrier family 6 member 8), solute carrier family 6 (neurotransmitter transporter; creatine); member 10 (pseudogene), solute carrier family 6 (neurotransmitter transporter; creatine); member 8 | 1.1314 | 0.0363 |
| 215820_x_at | SNX13     | sorting nexin 13                                                                                                                                                                                                                                                                                         | 0.5227 | 0.0038 |
| 215823_x_at | LOC341315 | hypothetical LOC341315, poly(A) binding protein; cytoplasmic 1, poly(A) binding protein; cytoplasmic 3, similar to Polyadenylate-binding protein 1 (Poly(A)-binding protein 1) (PABP 1)                                                                                                                  | 0.254  | 0.0058 |
| 215832_x_at | PICALM    | phosphatidylinositol binding clathrin assembly protein                                                                                                                                                                                                                                                   | 0.4643 | 0.0258 |
| 215833_s_at | SPPL2B    | signal peptide peptidase-like 2B                                                                                                                                                                                                                                                                         | 0.438  | 0.0133 |

|             |              |                                                                                                                                                     |        |        |
|-------------|--------------|-----------------------------------------------------------------------------------------------------------------------------------------------------|--------|--------|
| 215850_s_at | NDUFA5       | NADH dehydrogenase (ubiquinone) 1 alpha subcomplex; 5; 13kDa                                                                                        | 0.9749 | 0.0023 |
| 215854_at   |              | CDNA FLJ11844 fis; clone HEMBA1006665                                                                                                               | 0.3867 | 0.0096 |
| 215861_at   | RP4-724E16.2 | hypothetical protein FLJ14031                                                                                                                       | 0.1802 | 0.0015 |
| 215866_at   |              | CDNA: FLJ21285 fis; clone COL01912                                                                                                                  | 0.2572 | 0.0042 |
| 215867_x_at | CA12         | carbonic anhydrase XII                                                                                                                              | 1.0248 | 0.013  |
| 215873_x_at | ABCC10       | ATP-binding cassette; sub-family C (CFTR/MRP); member 10                                                                                            | 0.4093 | 0.0335 |
| 215882_at   | CEP152       | Centrosomal protein 152kDa                                                                                                                          | 0.3589 | 0.0323 |
| 215887_at   | ZNF277P      | zinc finger protein 277 pseudogene                                                                                                                  | 0.3305 | 0.0425 |
| 215888_at   | PDS5B        | Androgen-induced proliferation inhibitor                                                                                                            | 1.1762 | 0.0098 |
| 215891_s_at | GM2A         | GM2 ganglioside activator                                                                                                                           | 1.2282 | 0.019  |
| 215895_x_at | ADFP         | Adipose differentiation-related protein                                                                                                             | 0.1943 | 0.0018 |
| 215897_at   | MED25        | mediator complex subunit 25                                                                                                                         | 0.4378 | 0.0119 |
| 215898_at   | TLL5         | tubulin tyrosine ligase-like family; member 5                                                                                                       | 0.6703 | 0.0042 |
| 215910_s_at | FNDC3A       | fibronectin type III domain containing 3A                                                                                                           | 0.6407 | 0.0418 |
| 215919_s_at | MRPS11       | mitochondrial ribosomal protein S11                                                                                                                 | 0.9356 | 0.0007 |
| 215920_s_at | LOC388237    | pyridoxal-dependent decarboxylase domain containing 2, similar to kidney-specific protein (KS), similar to nuclear pore complex interacting protein | 0.7397 | 0.0006 |
| 215921_at   | LOC388237    | similar to kidney-specific protein (KS), similar to nuclear pore complex interacting protein                                                        | 0.9949 | 0.0001 |
| 215926_x_at | SNAPC4       | small nuclear RNA activating complex; polypeptide 4; 190kDa                                                                                         | 0.4186 | 0.0029 |
| 215936_s_at | KIAA1033     | KIAA1033                                                                                                                                            | 1.5404 | 0      |
| 215942_s_at | GTSE1        | G-2 and S-phase expressed 1                                                                                                                         | 0.9545 | 0.0015 |
| 215945_s_at | TRIM2        | tripartite motif-containing 2                                                                                                                       | 0.389  | 0.0429 |
| 215954_s_at | C19orf29     | chromosome 19 open reading frame 29                                                                                                                 | 0.5844 | 0.0044 |
| 215968_at   |              | Clone 24442 mRNA sequence                                                                                                                           | 0.3278 | 0.008  |
| 215978_x_at | LOC152719    | hypothetical protein LOC152719                                                                                                                      | 0.4384 | 0.0141 |
| 215992_s_at | RAPGEF2      | Rap guanine nucleotide exchange factor (GEF) 2                                                                                                      | 0.7059 | 0.006  |
| 215997_s_at | CUL4B        | cullin 4B                                                                                                                                           | 0.8144 | 0.0123 |
| 216002_at   |              | CDNA FLJ12105 fis; clone HEMBB1002699                                                                                                               | 0.1594 | 0.0272 |
| 216022_at   |              | Transcribed locus                                                                                                                                   | 0.7387 | 0.0023 |
| 216026_s_at | POLE         | polymerase (DNA directed); epsilon                                                                                                                  | 0.5187 | 0.0034 |
| 216044_x_at | FAM69A       | family with sequence similarity 69; member A                                                                                                        | 1.1704 | 0.0042 |
| 216048_s_at | RHOBTB3      | Rho-related BTB domain containing 3                                                                                                                 | 1.6373 | 0.0063 |
| 216049_at   | RHOBTB3      | Rho-related BTB domain containing 3                                                                                                                 | 0.3711 | 0.0029 |
| 216068_at   |              | MRNA; cDNA DKFZp434N021 (from clone DKFZp434N021)                                                                                                   | 0.1009 | 0.0352 |



|             |           |                                                                                                                                             |        |        |
|-------------|-----------|---------------------------------------------------------------------------------------------------------------------------------------------|--------|--------|
| 216069_at   |           | CDNA FLJ31388 fis; clone NT2NE1000023                                                                                                       | 0.2995 | 0.0003 |
| 216086_at   | SV2C      | synaptic vesicle glycoprotein 2C                                                                                                            | 1.6609 | 0.0147 |
| 216091_s_at | BTRC      | beta-transducin repeat containing                                                                                                           | 0.6045 | 0.0007 |
| 216094_at   |           | CDNA: FLJ21670 fis; clone COL09010                                                                                                          | 0.4545 | 0.0048 |
| 216095_x_at | MTMR1     | myotubularin related protein 1                                                                                                              | 0.6783 | 0.0022 |
| 216101_at   |           | Full length insert cDNA clone YR67C11                                                                                                       | 0.2693 | 0.0113 |
| 216109_at   | THRAP2    | Thyroid hormone receptor associated protein 2                                                                                               | 1.4599 | 0.0005 |
| 216111_x_at | PMS2L3    | postmeiotic segregation increased 2-like 3                                                                                                  | 0.831  | 0.0001 |
| 216113_at   | ABI2      | Abl interactor 2                                                                                                                            | 0.2845 | 0.0157 |
| 216115_at   | NF1       | Neurofibromin 1 (neurofibromatosis; von Recklinghausen disease; Watson disease)                                                             | 0.6188 | 0.0263 |
| 216120_s_at | ATP2B2    | ATPase; Ca <sup>++</sup> transporting; plasma membrane 2                                                                                    | 1.3238 | 0.0259 |
| 216144_at   |           | MRNA; cDNA DKFZp434K1126 (from clone DKFZp434K1126)                                                                                         | 0.175  | 0.0086 |
| 216155_at   |           | CDNA: FLJ20890 fis; clone ADKA03323                                                                                                         | 0.2653 | 0.0239 |
| 216170_at   |           | CDNA: FLJ21618 fis; clone COL07487                                                                                                          | 0.5633 | 0      |
| 216173_at   |           | CDNA: FLJ21707 fis; clone COL09953                                                                                                          | 0.8005 | 0.001  |
| 216187_x_at |           | Alu repeat (LNX1) mRNA sequence                                                                                                             | 0.3657 | 0.0066 |
| 216189_at   |           | Homo sapiens; clone IMAGE:3344506                                                                                                           | 0.5027 | 0.0003 |
| 216194_s_at | TBCB      | tubulin folding cofactor B                                                                                                                  | 0.4421 | 0.007  |
| 216197_at   | ATF7IP    | activating transcription factor 7 interacting protein                                                                                       | 1.662  | 0      |
| 216198_at   | ATF7IP    | activating transcription factor 7 interacting protein                                                                                       | 0.2519 | 0.0011 |
| 216211_at   |           | MRNA; cDNA DKFZp564A023 (from clone DKFZp564A023)                                                                                           | 0.649  | 0.0275 |
| 216222_s_at | MYO10     | myosin X                                                                                                                                    | 0.4766 | 0.0401 |
| 216228_s_at | WDHD1     | WD repeat and HMG-box DNA binding protein 1                                                                                                 | 0.7861 | 0.0085 |
| 216232_s_at | GCN1L1    | GCN1 general control of amino-acid synthesis 1-like 1 (yeast)                                                                               | 0.5201 | 0.0214 |
| 216234_s_at | LOC730418 | protein kinase; cAMP-dependent; catalytic; alpha, similar to protein kinase; cAMP-dependent; catalytic; gamma                               | 0.5416 | 0.0036 |
| 216236_s_at | SLC2A14   | solute carrier family 2 (facilitated glucose transporter); member 14, solute carrier family 2 (facilitated glucose transporter); member 3   | 1.141  | 0.0121 |
| 216237_s_at | MCM5      | minichromosome maintenance complex component 5                                                                                              | 2.091  | 0.0011 |
| 216242_x_at | POLR2J2   | DNA directed RNA polymerase II polypeptide J-related, RPB11b2 protein, polymerase (RNA) II (DNA directed) polypeptide J; 13.3kDa pseudogene | 0.6108 | 0.004  |
| 216263_s_at | NGDN      | neuroguidin; EIF4E binding protein                                                                                                          | 0.2293 | 0.0072 |

|             |             |                                                                                                                                                                                                                                                                                                                                                                                                                                                                                                                                                                                                                                                           |        |        |
|-------------|-------------|-----------------------------------------------------------------------------------------------------------------------------------------------------------------------------------------------------------------------------------------------------------------------------------------------------------------------------------------------------------------------------------------------------------------------------------------------------------------------------------------------------------------------------------------------------------------------------------------------------------------------------------------------------------|--------|--------|
| 216266_s_at | ARFGEF1     | ADP-ribosylation factor guanine nucleotide-exchange factor 1(brefeldin A-inhibited)                                                                                                                                                                                                                                                                                                                                                                                                                                                                                                                                                                       | 1.3608 | 0      |
| 216268_s_at | JAG1        | jagged 1 (Alagille syndrome)                                                                                                                                                                                                                                                                                                                                                                                                                                                                                                                                                                                                                              | 1.9825 | 0      |
| 216297_at   |             | MRNA; cDNA DKFZp564C156 (from clone DKFZp564C156)                                                                                                                                                                                                                                                                                                                                                                                                                                                                                                                                                                                                         | 0.1933 | 0.0024 |
| 216306_x_at | PTBP1       | polypyrimidine tract binding protein 1                                                                                                                                                                                                                                                                                                                                                                                                                                                                                                                                                                                                                    | 0.3578 | 0.001  |
| 216309_x_at | JRK         | jerky homolog (mouse)                                                                                                                                                                                                                                                                                                                                                                                                                                                                                                                                                                                                                                     | 0.6535 | 0.0119 |
| 216315_x_at | Kua-UEV     | similar to ubiquitin-conjugating enzyme E2 variant 1 isoform d, ubiquitin-conjugating enzyme E2 variant 1                                                                                                                                                                                                                                                                                                                                                                                                                                                                                                                                                 | 0.1825 | 0.0316 |
| 216347_s_at | PPP1R13B    | protein phosphatase 1; regulatory (inhibitor) subunit 13B                                                                                                                                                                                                                                                                                                                                                                                                                                                                                                                                                                                                 | 0.8488 | 0.0236 |
| 216388_s_at | LTB4R       | leukotriene B4 receptor                                                                                                                                                                                                                                                                                                                                                                                                                                                                                                                                                                                                                                   | 0.5995 | 0.0456 |
| 216442_x_at | FN1         | fibronectin 1                                                                                                                                                                                                                                                                                                                                                                                                                                                                                                                                                                                                                                             | 1.8888 | 0.0001 |
| 216459_x_at | TIGD1L      | tigger transposable element derived 1-like                                                                                                                                                                                                                                                                                                                                                                                                                                                                                                                                                                                                                | 0.2479 | 0.003  |
| 216468_s_at | ZNF682      | zinc finger protein 682                                                                                                                                                                                                                                                                                                                                                                                                                                                                                                                                                                                                                                   | 0.5313 | 0.0054 |
| 216497_at   | hCG_2023776 | hCG2023776, heterogeneous nuclear ribonucleoprotein A1, heterogeneous nuclear ribonucleoprotein A1 pseudogene, heterogeneous nuclear ribonucleoprotein A1 pseudogene 4, heterogeneous nuclear ribonucleoprotein A1 pseudogene 5, heterogeneous nuclear ribonucleoprotein A1-like, hypothetical LOC642817, similar to Heterogeneous nuclear ribonucleoprotein A1 (Helix-destabilizing protein) (Single-strand RNA-binding protein) (hnRNP core protein A1) (HDP), similar to Heterogeneous nuclear ribonucleoprotein A1 (Helix-destabilizing protein) (Single-strand binding protein) (hnRNP core protein A1) (HDP-1) (Topoisomerase-inhibitor suppressed) | 0.1692 | 0.0465 |
| 216506_x_at | MLLT10      | myeloid/lymphoid or mixed-lineage leukemia (trithorax homolog; Drosophila); translocated to; 10                                                                                                                                                                                                                                                                                                                                                                                                                                                                                                                                                           | 0.2686 | 0.0314 |
| 216509_x_at | MLLT10      | myeloid/lymphoid or mixed-lineage leukemia (trithorax homolog; Drosophila); translocated to; 10                                                                                                                                                                                                                                                                                                                                                                                                                                                                                                                                                           | 0.1862 | 0.0135 |
| 216525_x_at | PMS2L3      | postmeiotic segregation increased 2-like 3                                                                                                                                                                                                                                                                                                                                                                                                                                                                                                                                                                                                                | 0.6832 | 0.0009 |
| 216527_at   |             | CDNA FLJ46556 fis; clone THYMU3039807                                                                                                                                                                                                                                                                                                                                                                                                                                                                                                                                                                                                                     | 0.3059 | 0.035  |
| 216531_at   | YY2         | YY2 transcription factor                                                                                                                                                                                                                                                                                                                                                                                                                                                                                                                                                                                                                                  | 0.1511 | 0.0281 |
| 216538_at   |             | MRNA; cDNA DKFZp566C093 (from clone DKFZp566C093)                                                                                                                                                                                                                                                                                                                                                                                                                                                                                                                                                                                                         | 0.365  | 0.0057 |
| 216548_x_at | HMG4L       | high-mobility group (nonhistone chromosomal) protein 4-like                                                                                                                                                                                                                                                                                                                                                                                                                                                                                                                                                                                               | 0.6861 | 0.014  |
| 216550_x_at | ANKRD12     | ankyrin repeat domain 12                                                                                                                                                                                                                                                                                                                                                                                                                                                                                                                                                                                                                                  | 0.4594 | 0.0129 |

|             |           |                                                                                                                                                   |        |        |
|-------------|-----------|---------------------------------------------------------------------------------------------------------------------------------------------------|--------|--------|
| 216551_x_at | PLCG1     | phospholipase C; gamma 1                                                                                                                          | 0.2742 | 0.0292 |
| 216563_at   | ANKRD12   | Ankyrin repeat domain 12                                                                                                                          | 0.4157 | 0.0242 |
| 216602_s_at | FARSA     | phenylalanyl-tRNA synthetase; alpha subunit                                                                                                       | 0.7873 | 0.0022 |
| 216614_at   |           | MRNA; cDNA DKFZp564F212 (from clone DKFZp564F212)                                                                                                 | 0.7279 | 0.0382 |
| 216677_at   | ZNF154    | zinc finger protein 154                                                                                                                           | 0.1227 | 0.0081 |
| 216697_at   | TRIO      | Triple functional domain (PTPRF interacting)                                                                                                      | 0.2546 | 0.0296 |
| 216702_x_at |           | Unknown protein                                                                                                                                   | 0.1578 | 0.0136 |
| 216713_at   | KRIT1     | KRIT1; ankyrin repeat containing                                                                                                                  | 0.465  | 0.003  |
| 216755_at   | OSBPL10   | oxysterol binding protein-like 10                                                                                                                 | 0.1412 | 0.0384 |
| 216766_at   |           | CDNA: FLJ21499 fis; clone COL05634                                                                                                                | 0.3554 | 0.0475 |
| 216843_x_at | LOC732139 | postmeiotic segregation increased 2-like 1, similar to postmeiotic segregation increased 2-like 2                                                 | 0.6343 | 0.0078 |
| 216858_x_at |           |                                                                                                                                                   | 0.6408 | 0.0016 |
| 216859_x_at |           |                                                                                                                                                   | 0.3259 | 0.0067 |
| 216863_s_at | MORC2     | MORC family CW-type zinc finger 2                                                                                                                 | 0.8432 | 0.0021 |
| 216870_x_at | DLEU2     | deleted in lymphocytic leukemia; 2                                                                                                                | 1.2076 | 0.0001 |
| 216902_s_at | LOC653390 | RRN3 RNA polymerase I transcription factor homolog (S. cerevisiae), RRN3 RNA polymerase I transcription factor homolog (S. cerevisiae) pseudogene | 1.0222 | 0.0146 |
| 216908_x_at | LOC730092 | RRN3 RNA polymerase I transcription factor homolog (S. cerevisiae) pseudogene                                                                     | 1.2482 | 0.0004 |
| 216915_s_at | PTPN12    | protein tyrosine phosphatase; non-receptor type 12                                                                                                | 0.8399 | 0.0177 |
| 216926_s_at | KIAA0892  | KIAA0892                                                                                                                                          | 0.2156 | 0.0251 |
| 216933_x_at | APC       | adenomatosis polyposis coli                                                                                                                       | 1.2428 | 0      |
| 216945_x_at | PASK      | PAS domain containing serine/threonine kinase                                                                                                     | 0.5001 | 0.001  |
| 216952_s_at | LMNB2     | lamin B2                                                                                                                                          | 1.094  | 0.0026 |
| 216957_at   | USP22     | ubiquitin specific peptidase 22                                                                                                                   | 0.2825 | 0.0014 |
| 216960_s_at | ZNF133    | zinc finger protein 133                                                                                                                           | 1.299  | 0      |
| 216969_s_at | KIF22     | kinesin family member 22, kinesin-like DNA-binding protein pseudogene                                                                             | 0.4081 | 0.0045 |
| 216977_x_at | SNRPA1    | small nuclear ribonucleoprotein polypeptide A'                                                                                                    | 0.4594 | 0.0401 |
| 216983_s_at | ZNF224    | zinc finger protein 224                                                                                                                           | 0.7624 | 0.0001 |
| 217010_s_at | CDC25C    | cell division cycle 25 homolog C (S. pombe)                                                                                                       | 0.3028 | 0.0386 |
| 217016_x_at | FLJ23172  | hypothetical LOC389177                                                                                                                            | 0.1695 | 0.0397 |
| 217027_x_at | KPNB1     | karyopherin (importin) beta 1                                                                                                                     | 0.3603 | 0.0254 |
| 217042_at   | RDH11     | retinol dehydrogenase 11 (all-trans/9-cis/11-cis)                                                                                                 | 0.8292 | 0.0003 |
| 217049_x_at | PCDH11Y   | protocadherin 11 Y-linked                                                                                                                         | 0.1293 | 0.0343 |
| 217076_s_at |           |                                                                                                                                                   | 0.202  | 0.0085 |

|             |             |                                                                                                                                                                                                                                                                                                                                                                                                                                                                                                                                                                                                                                                           |        |        |
|-------------|-------------|-----------------------------------------------------------------------------------------------------------------------------------------------------------------------------------------------------------------------------------------------------------------------------------------------------------------------------------------------------------------------------------------------------------------------------------------------------------------------------------------------------------------------------------------------------------------------------------------------------------------------------------------------------------|--------|--------|
| 217094_s_at | ITCH        | itchy homolog E3 ubiquitin protein ligase (mouse)                                                                                                                                                                                                                                                                                                                                                                                                                                                                                                                                                                                                         | 1.0373 | 0.0006 |
| 217097_s_at | PHTF2       | putative homeodomain transcription factor 2                                                                                                                                                                                                                                                                                                                                                                                                                                                                                                                                                                                                               | 0.9004 | 0.0008 |
| 217100_s_at | UBXD7       | UBX domain containing 7                                                                                                                                                                                                                                                                                                                                                                                                                                                                                                                                                                                                                                   | 0.8356 | 0.0125 |
| 217104_at   | ST20        | suppressor of tumorigenicity 20                                                                                                                                                                                                                                                                                                                                                                                                                                                                                                                                                                                                                           | 0.5439 | 0.0004 |
| 217123_x_at | PMCHL1      | pro-melanin-concentrating hormone-like 1                                                                                                                                                                                                                                                                                                                                                                                                                                                                                                                                                                                                                  | 0.1109 | 0.0478 |
| 217124_at   | IQCE        | IQ motif containing E                                                                                                                                                                                                                                                                                                                                                                                                                                                                                                                                                                                                                                     | 0.6734 | 0.0058 |
| 217140_s_at | VDAC1       | voltage-dependent anion channel 1                                                                                                                                                                                                                                                                                                                                                                                                                                                                                                                                                                                                                         | 0.8794 | 0.0025 |
| 217152_at   |             | CDNA FLJ14074 fis; clone HEMBB1001869                                                                                                                                                                                                                                                                                                                                                                                                                                                                                                                                                                                                                     | 0.3707 | 0.0093 |
| 217164_at   |             |                                                                                                                                                                                                                                                                                                                                                                                                                                                                                                                                                                                                                                                           | 1.1971 | 0.0003 |
| 217176_s_at | ZFX         | zinc finger protein; X-linked                                                                                                                                                                                                                                                                                                                                                                                                                                                                                                                                                                                                                             | 0.2392 | 0.0156 |
| 217189_s_at | SMG7        | Smg-7 homolog; nonsense mediated mRNA decay factor (C. elegans)                                                                                                                                                                                                                                                                                                                                                                                                                                                                                                                                                                                           | 0.39   | 0.0012 |
| 217208_s_at | DLG1        | discs; large homolog 1 (Drosophila)                                                                                                                                                                                                                                                                                                                                                                                                                                                                                                                                                                                                                       | 1.075  | 0.0063 |
| 217225_x_at | NOMO2       | NODAL modulator 2                                                                                                                                                                                                                                                                                                                                                                                                                                                                                                                                                                                                                                         | 0.7734 | 0      |
| 217226_s_at | SFXN3       | sideroflexin 3                                                                                                                                                                                                                                                                                                                                                                                                                                                                                                                                                                                                                                            | 1.089  | 0.0088 |
| 217246_s_at | DIAPH2      | diaphanous homolog 2 (Drosophila)                                                                                                                                                                                                                                                                                                                                                                                                                                                                                                                                                                                                                         | 0.2389 | 0.0075 |
| 217294_s_at | ENO1        | enolase 1; (alpha)                                                                                                                                                                                                                                                                                                                                                                                                                                                                                                                                                                                                                                        | 1.332  | 0.0094 |
| 217297_s_at | MYO9B       | myosin IXB                                                                                                                                                                                                                                                                                                                                                                                                                                                                                                                                                                                                                                                | 1.2878 | 0.001  |
| 217299_s_at | NBN         | nibrin                                                                                                                                                                                                                                                                                                                                                                                                                                                                                                                                                                                                                                                    | 0.8813 | 0.0017 |
| 217300_at   |             |                                                                                                                                                                                                                                                                                                                                                                                                                                                                                                                                                                                                                                                           | 0.1162 | 0.0464 |
| 217310_s_at | FOXJ3       | forkhead box J3                                                                                                                                                                                                                                                                                                                                                                                                                                                                                                                                                                                                                                           | 0.5087 | 0.0035 |
| 217353_at   | hCG_2023776 | hCG2023776, heterogeneous nuclear ribonucleoprotein A1, heterogeneous nuclear ribonucleoprotein A1 pseudogene, heterogeneous nuclear ribonucleoprotein A1 pseudogene 4, heterogeneous nuclear ribonucleoprotein A1 pseudogene 5, heterogeneous nuclear ribonucleoprotein A1-like, hypothetical LOC642817, similar to Heterogeneous nuclear ribonucleoprotein A1 (Helix-destabilizing protein) (Single-strand RNA-binding protein) (hnRNP core protein A1) (HDP), similar to Heterogeneous nuclear ribonucleoprotein A1 (Helix-destabilizing protein) (Single-strand binding protein) (hnRNP core protein A1) (HDP-1) (Topoisomerase-inhibitor suppressed) | 0.326  | 0.0055 |
| 217356_s_at | PGK1        | phosphoglycerate kinase 1                                                                                                                                                                                                                                                                                                                                                                                                                                                                                                                                                                                                                                 | 0.8016 | 0.0036 |
| 217370_x_at | FUS         | fusion (involved in t(12;16) in malignant liposarcoma)                                                                                                                                                                                                                                                                                                                                                                                                                                                                                                                                                                                                    | 1.2242 | 0      |
| 217373_x_at | MDM2        | Mdm2; transformed 3T3 cell double minute 2; p53 binding protein (mouse)                                                                                                                                                                                                                                                                                                                                                                                                                                                                                                                                                                                   | 0.7486 | 0.0185 |

|             |           |                                                                                                                            |        |        |
|-------------|-----------|----------------------------------------------------------------------------------------------------------------------------|--------|--------|
| 217398_x_at | GAPDH     | glyceraldehyde-3-phosphate dehydrogenase                                                                                   | 0.5555 | 0      |
| 217403_s_at | ZNF227    | zinc finger protein 227                                                                                                    | 1.1128 | 0.002  |
| 217432_s_at | IDS       | iduronate 2-sulfatase (Hunter syndrome)                                                                                    | 0.5107 | 0.0174 |
| 217440_at   |           | MRNA; cDNA DKFZp566A193 (from clone DKFZp566A193)                                                                          | 0.1104 | 0.018  |
| 217445_s_at | GART      | phosphoribosylglycinamide formyltransferase; phosphoribosylglycinamide synthetase; phosphoribosylaminoimidazole synthetase | 0.4894 | 0.0245 |
| 217446_x_at |           | MRNA; cDNA DKFZp434M054 (from clone DKFZp434M054)                                                                          | 0.2631 | 0.0084 |
| 217448_s_at | LOC285412 | TOX high mobility group box family member 4, similar to Epidermal Langerhans cell protein LCP1                             | 0.4331 | 0.0391 |
| 217485_x_at | LOC732139 | postmeiotic segregation increased 2-like 1, similar to postmeiotic segregation increased 2-like 2                          | 0.3991 | 0.0472 |
| 217486_s_at | ZDHHC17   | zinc finger; DHHC-type containing 17                                                                                       | 0.819  | 0.0011 |
| 217506_at   | LOC400642 | Hypothetical gene supported by BC041875; BX648984                                                                          | 0.8911 | 0.0497 |
| 217536_x_at |           | Transcribed locus                                                                                                          | 0.2597 | 0.0292 |
| 217539_at   | C18orf25  | chromosome 18 open reading frame 25                                                                                        | 0.2091 | 0.0355 |
| 217540_at   |           | Transcribed locus                                                                                                          | 0.6054 | 0.0056 |
| 217547_x_at | ZNF675    | zinc finger protein 675                                                                                                    | 0.6659 | 0.0305 |
| 217556_at   | CLCN4     | chloride channel 4                                                                                                         | 0.4392 | 0.0042 |
| 217586_x_at |           |                                                                                                                            | 0.5999 | 0.0038 |
| 217588_at   | CATSPER2  | cation channel; sperm associated 2, cation channel; sperm associated 2 pseudogene 1                                        | 0.2503 | 0.0483 |
| 217602_at   | PPIA      | peptidylprolyl isomerase A (cyclophilin A)                                                                                 | 0.2194 | 0.018  |
| 217605_at   | USP27X    | ubiquitin specific peptidase 27; X-linked                                                                                  | 0.2223 | 0.0247 |
| 217608_at   | P18SRP    | P18SRP protein                                                                                                             | 0.6944 | 0.0277 |
| 217610_at   |           | CDNA FLJ38765 fis; clone KIDNE2014489                                                                                      | 0.7425 | 0.0047 |
| 217612_at   | TIMM50    | translocase of inner mitochondrial membrane 50 homolog (S. cerevisiae)                                                     | 0.2538 | 0.0364 |
| 217620_s_at | PIK3CB    | phosphoinositide-3-kinase; catalytic; beta polypeptide                                                                     | 0.1999 | 0.0493 |
| 217624_at   | PDAP1     | PDGFA associated protein 1                                                                                                 | 0.2832 | 0.0005 |
| 217627_at   | ZNF573    | zinc finger protein 573                                                                                                    | 0.9501 | 0.0071 |
| 217640_x_at | C18orf24  | chromosome 18 open reading frame 24                                                                                        | 1.1533 | 0.0017 |
| 217643_x_at |           |                                                                                                                            | 0.7009 | 0      |
| 217644_s_at | SOS2      | son of sevenless homolog 2 (Drosophila)                                                                                    | 0.4561 | 0.0111 |
| 217650_x_at | ST3GAL2   | ST3 beta-galactoside alpha-2,3-sialyltransferase 2                                                                         | 0.3006 | 0.0133 |
| 217653_x_at |           |                                                                                                                            | 0.795  | 0.0017 |

|             |          |                                                                                          |        |        |
|-------------|----------|------------------------------------------------------------------------------------------|--------|--------|
| 217656_at   |          | Transcribed locus                                                                        | 0.1344 | 0.0225 |
| 217662_x_at |          | Transcribed locus                                                                        | 0.3361 | 0.0026 |
| 217665_at   |          | CDNA FLJ25947 fis; clone JTH14708                                                        | 0.3402 | 0.0483 |
| 217671_at   |          | Transcribed locus                                                                        | 0.5454 | 0.02   |
| 217678_at   | SLC7A11  | solute carrier family 7; (cationic amino acid transporter; y+ system) member 11          | 1.1832 | 0.0292 |
| 217679_x_at |          |                                                                                          | 0.4211 | 0.0311 |
| 217701_x_at |          |                                                                                          | 0.5882 | 0.016  |
| 217704_x_at | SUZ12P   | Suppressor of zeste 12 homolog pseudogene                                                | 0.5633 | 0.0046 |
| 217713_x_at |          |                                                                                          | 0.2276 | 0.0286 |
| 217714_x_at | STMN1    | stathmin 1/oncoprotein 18                                                                | 0.5501 | 0.0001 |
| 217715_x_at |          |                                                                                          | 0.3063 | 0.0028 |
| 217718_s_at | YWHAB    | tyrosine 3-monooxygenase/tryptophan 5-monooxygenase activation protein; beta polypeptide | 0.1658 | 0.0207 |
| 217727_x_at | VPS35    | vacuolar protein sorting 35 homolog (S. cerevisiae)                                      | 0.5462 | 0.0001 |
| 217736_s_at | EIF2AK1  | eukaryotic translation initiation factor 2-alpha kinase 1                                | 0.5126 | 0.0011 |
| 217765_at   | NRBP1    | nuclear receptor binding protein 1                                                       | 0.4558 | 0.0127 |
| 217775_s_at | RDH11    | retinol dehydrogenase 11 (all-trans/9-cis/11-cis)                                        | 0.5165 | 0.0276 |
| 217784_at   | YKT6     | YKT6 v-SNARE homolog (S. cerevisiae)                                                     | 0.8299 | 0.0106 |
| 217785_s_at | YKT6     | YKT6 v-SNARE homolog (S. cerevisiae)                                                     | 0.9446 | 0.041  |
| 217791_s_at | ALDH18A1 | aldehyde dehydrogenase 18 family; member A1                                              | 0.8827 | 0.0015 |
| 217794_at   | PRR13    | proline rich 13                                                                          | 0.3408 | 0.0041 |
| 217802_s_at | NUCKS1   | nuclear casein kinase and cyclin-dependent kinase substrate 1                            | 0.372  | 0.0037 |
| 217805_at   | ILF3     | interleukin enhancer binding factor 3; 90kDa                                             | 0.6778 | 0.0017 |
| 217815_at   | SUPT16H  | suppressor of Ty 16 homolog (S. cerevisiae)                                              | 0.5708 | 0.0187 |
| 217819_at   | GOLGA7   | golgi autoantigen; golgin subfamily a; 7                                                 | 0.3096 | 0.0161 |
| 217835_x_at | C20orf24 | chromosome 20 open reading frame 24                                                      | 0.3954 | 0.0201 |
| 217840_at   | DDX41    | DEAD (Asp-Glu-Ala-Asp) box polypeptide 41                                                | 1.013  | 0.0001 |
| 217842_at   | LUC7L2   | LUC7-like 2 (S. cerevisiae)                                                              | 0.5286 | 0.001  |
| 217859_s_at | SLC39A9  | solute carrier family 39 (zinc transporter); member 9                                    | 0.8841 | 0.0098 |
| 217871_s_at | MIF      | macrophage migration inhibitory factor (glycosylation-inhibiting factor)                 | 0.3494 | 0.0016 |
| 217878_s_at | CDC27    | cell division cycle 27 homolog (S. cerevisiae)                                           | 0.5708 | 0.0227 |
| 217888_s_at | ARFGAP1  | ADP-ribosylation factor GTPase activating protein 1                                      | 0.8256 | 0.0027 |
| 217891_at   | C16orf58 | chromosome 16 open reading frame 58                                                      | 0.6679 | 0.0216 |

|             |           |                                                                         |        |        |
|-------------|-----------|-------------------------------------------------------------------------|--------|--------|
| 217926_at   | C19orf53  | chromosome 19 open reading frame 53                                     | 0.3941 | 0.0016 |
| 217941_s_at | ERBB2IP   | erbb2 interacting protein                                               | 0.4292 | 0.0015 |
| 217946_s_at | SAE1      | SUMO1 activating enzyme subunit 1                                       | 1.2456 | 0      |
| 217948_at   | FAM127B   | family with sequence similarity 127; member B                           | 0.6748 | 0.0005 |
| 217949_s_at | VKORC1    | vitamin K epoxide reductase complex; subunit 1                          | 0.663  | 0.0098 |
| 217956_s_at | ENOPH1    | enolase-phosphatase 1                                                   | 0.3093 | 0.0184 |
| 217957_at   | C16orf80  | chromosome 16 open reading frame 80                                     | 0.8825 | 0.0001 |
| 217970_s_at | CNOT6     | CCR4-NOT transcription complex; subunit 6                               | 0.6122 | 0.0332 |
| 217972_at   | CHCHD3    | coiled-coil-helix-coiled-coil-helix domain containing 3                 | 0.3716 | 0.0399 |
| 218008_at   | C7orf42   | chromosome 7 open reading frame 42                                      | 0.574  | 0.0001 |
| 218009_s_at | PRC1      | protein regulator of cytokinesis 1                                      | 5.0663 | 0      |
| 218010_x_at | C20orf149 | chromosome 20 open reading frame 149                                    | 0.8147 | 0.0055 |
| 218013_x_at | DCTN4     | dynactin 4 (p62)                                                        | 0.9005 | 0.0401 |
| 218023_s_at | FAM53C    | family with sequence similarity 53; member C                            | 0.7612 | 0.0023 |
| 218036_x_at | NMD3      | NMD3 homolog (S. cerevisiae)                                            | 0.7694 | 0.0476 |
| 218039_at   | NUSAP1    | nucleolar and spindle associated protein 1                              | 1.0908 | 0.0016 |
| 218045_x_at | PTMS      | parathymosin                                                            | 1.0095 | 0.0008 |
| 218048_at   | COMMD3    | COMM domain containing 3                                                | 0.3444 | 0.0298 |
| 218052_s_at | ATP13A1   | ATPase type 13A1                                                        | 1.0396 | 0      |
| 218055_s_at | WDR41     | WD repeat domain 41                                                     | 1.6181 | 0      |
| 218056_at   | BFAR      | bifunctional apoptosis regulator                                        | 1.2137 | 0      |
| 218057_x_at | COX4NB    | COX4 neighbor                                                           | 0.4394 | 0.0069 |
| 218064_s_at | AKAP8L    | A kinase (PRKA) anchor protein 8-like                                   | 1.4531 | 0      |
| 218069_at   | XTP3TPA   | XTP3-transactivated protein A                                           | 0.5877 | 0.0167 |
| 218075_at   | AAAS      | achalasia; adrenocortical insufficiency; alacrimia (Allgrove; triple-A) | 0.3757 | 0.0211 |
| 218088_s_at | RRAGC     | Ras-related GTP binding C                                               | 0.5434 | 0.036  |
| 218089_at   | C20orf4   | chromosome 20 open reading frame 4                                      | 0.5708 | 0.002  |
| 218110_at   | XAB2      | XPA binding protein 2                                                   | 0.3394 | 0.0025 |
| 218115_at   | ASF1B     | ASF1 anti-silencing function 1 homolog B (S. cerevisiae)                | 2.4878 | 0.0002 |
| 218131_s_at | GATAD2A   | GATA zinc finger domain containing 2A                                   | 0.6553 | 0.0064 |
| 218134_s_at | RBM22     | RNA binding motif protein 22                                            | 0.5564 | 0.0003 |
| 218135_at   | ERGIC2    | ERGIC and golgi 2                                                       | 0.8626 | 0      |
| 218137_s_at | SMAP1     | stromal membrane-associated protein 1                                   | 0.4843 | 0.0055 |
| 218138_at   | MKKS      | McKusick-Kaufman syndrome                                               | 0.7124 | 0.0205 |
| 218145_at   | TRIB3     | tribbles homolog 3 (Drosophila)                                         | 1.9204 | 0.0007 |

|             |          |                                                                |        |        |
|-------------|----------|----------------------------------------------------------------|--------|--------|
| 218146_at   | GLT8D1   | glycosyltransferase 8 domain containing 1                      | 0.4665 | 0.0027 |
| 218147_s_at | GLT8D1   | glycosyltransferase 8 domain containing 1                      | 0.5082 | 0.0077 |
| 218148_at   | CENPT    | centromere protein T                                           | 0.6361 | 0.0257 |
| 218149_s_at | ZNF395   | zinc finger protein 395                                        | 0.7458 | 0.026  |
| 218152_at   | HMG20A   | high-mobility group 20A                                        | 0.4894 | 0.0165 |
| 218173_s_at | WHSC1L1  | Wolf-Hirschhorn syndrome candidate 1-like 1                    | 0.2812 | 0.0174 |
| 218183_at   | C16orf5  | chromosome 16 open reading frame 5                             | 0.6217 | 0.0208 |
| 218185_s_at | ARMC1    | armadillo repeat containing 1                                  | 0.6368 | 0.0003 |
| 218188_s_at | TIMM13   | translocase of inner mitochondrial membrane 13 homolog (yeast) | 0.3953 | 0.0249 |
| 218189_s_at | NANS     | N-acetylneuraminic acid synthase (sialic acid synthase)        | 1.4211 | 0.0001 |
| 218198_at   | DHX32    | DEAH (Asp-Glu-Ala-His) box polypeptide 32                      | 0.778  | 0.0064 |
| 218240_at   | NKIRAS2  | NFKB inhibitor interacting Ras-like 2                          | 0.7039 | 0.0002 |
| 218244_at   | NOL8     | nucleolar protein 8                                            | 0.4954 | 0.0089 |
| 218250_s_at | CNOT7    | CCR4-NOT transcription complex; subunit 7                      | 0.4166 | 0.0035 |
| 218252_at   | CKAP2    | cytoskeleton associated protein 2                              | 1.7243 | 0      |
| 218260_at   | C19orf58 | chromosome 19 open reading frame 58                            | 0.5196 | 0.0083 |
| 218269_at   | RNASEN   | ribonuclease III; nuclear                                      | 0.7263 | 0.0047 |
| 218274_s_at | ANKZF1   | ankyrin repeat and zinc finger domain containing 1             | 0.6661 | 0.0074 |
| 218284_at   | SMAD3    | SMAD family member 3                                           | 0.8594 | 0.0069 |
| 218290_at   | PLEKHJ1  | pleckstrin homology domain containing; family J member 1       | 0.523  | 0.01   |
| 218300_at   | C16orf53 | chromosome 16 open reading frame 53                            | 0.7234 | 0.0111 |
| 218302_at   | PSENE1   | presenilin enhancer 2 homolog (C. elegans)                     | 0.8733 | 0.0012 |
| 218308_at   | TACC3    | transforming; acidic coiled-coil containing protein 3          | 1.4475 | 0.0006 |
| 218317_x_at | GIYD1    | GIY-YIG domain containing 1, GIY-YIG domain containing 2       | 0.9459 | 0.0025 |
| 218324_s_at | SPATS2   | spermatogenesis associated; serine-rich 2                      | 2.2252 | 0      |
| 218329_at   | PRDM4    | PR domain containing 4                                         | 1.2311 | 0.0004 |
| 218337_at   | RAI16    | retinoic acid induced 16                                       | 0.4332 | 0.0064 |
| 218340_s_at | UBE1L2   | ubiquitin-activating enzyme E1-like 2                          | 1.6021 | 0.001  |
| 218343_s_at | GTF3C3   | general transcription factor IIIC; polypeptide 3; 102kDa       | 0.5399 | 0.0368 |
| 218344_s_at | RCOR3    | REST corepressor 3                                             | 1.3314 | 0.0016 |
| 218348_s_at | ZC3H7A   | zinc finger CCCH-type containing 7A                            | 0.5673 | 0.0017 |
| 218349_s_at | ZWILCH   | Zwilch; kinetochore associated; homolog (Drosophila)           | 2.4367 | 0      |
| 218350_s_at | GMNN     | geminin; DNA replication inhibitor                             | 2.6377 | 0      |
| 218355_at   | KIF4A    | kinesin family member 4A                                       | 2.49   | 0.0001 |



|             |           |                                                              |        |        |
|-------------|-----------|--------------------------------------------------------------|--------|--------|
| 218366_x_at | METT11D1  | methyltransferase 11 domain containing 1                     | 0.4535 | 0.0038 |
| 218368_s_at | TNFRSF12A | tumor necrosis factor receptor superfamily; member 12A       | 1.6369 | 0.003  |
| 218374_s_at | C12orf4   | chromosome 12 open reading frame 4                           | 1.0767 | 0.0016 |
| 218381_s_at | U2AF2     | U2 small nuclear RNA auxiliary factor 2                      | 0.3222 | 0.0351 |
| 218392_x_at | SFXN1     | sideroflexin 1                                               | 0.9646 | 0.0077 |
| 218395_at   | ACTR6     | ARP6 actin-related protein 6 homolog (yeast)                 | 0.6596 | 0.0007 |
| 218398_at   | MRPS30    | mitochondrial ribosomal protein S30                          | 0.658  | 0.0358 |
| 218399_s_at | CDCA4     | cell division cycle associated 4                             | 2.0459 | 0      |
| 218400_at   | OAS3      | 2'-5'-oligoadenylate synthetase 3; 100kDa                    | 1.4171 | 0.0237 |
| 218403_at   | TRIAP1    | TP53 regulated inhibitor of apoptosis 1                      | 0.4227 | 0.0192 |
| 218404_at   | SNX10     | sorting nexin 10                                             | 0.8925 | 0.0057 |
| 218409_s_at | DNAJC1    | DnaJ (Hsp40) homolog; subfamily C; member 1                  | 0.7269 | 0.0034 |
| 218412_s_at | GTF2IRD1  | GTF2I repeat domain containing 1                             | 0.7441 | 0.006  |
| 218414_s_at | NDE1      | nudE nuclear distribution gene E homolog 1 (A. nidulans)     | 0.4814 | 0.0073 |
| 218415_at   | VPS33B    | vacuolar protein sorting 33 homolog B (yeast)                | 0.7045 | 0.0071 |
| 218425_at   | TRIAD3    | TRIAD3 protein                                               | 0.6938 | 0.004  |
| 218426_s_at | TRIAD3    | TRIAD3 protein                                               | 0.8856 | 0.0004 |
| 218427_at   | SDCCAG3   | serologically defined colon cancer antigen 3                 | 0.5798 | 0.001  |
| 218430_s_at | RFXDC2    | regulatory factor X domain containing 2                      | 0.538  | 0.0257 |
| 218434_s_at | AACS      | acetoacetyl-CoA synthetase                                   | 1.4499 | 0.0004 |
| 218445_at   | H2AFY2    | H2A histone family; member Y2                                | 0.8967 | 0.0014 |
| 218447_at   | C16orf61  | chromosome 16 open reading frame 61                          | 0.52   | 0.0042 |
| 218448_at   | C20orf11  | chromosome 20 open reading frame 11                          | 0.9232 | 0.0001 |
| 218456_at   | CAPRIN2   | caprin family member 2                                       | 0.9895 | 0.0001 |
| 218457_s_at | DNMT3A    | DNA (cytosine-5-)-methyltransferase 3 alpha                  | 0.7555 | 0.0096 |
| 218458_at   | GMCL1     | germ cell-less homolog 1 (Drosophila)                        | 1.1498 | 0      |
| 218460_at   | HEATR2    | HEAT repeat containing 2                                     | 0.7698 | 0.0021 |
| 218464_s_at | C17orf63  | chromosome 17 open reading frame 63                          | 0.5676 | 0.0003 |
| 218465_at   | TMEM33    | transmembrane protein 33                                     | 0.6808 | 0.02   |
| 218473_s_at | GLT25D1   | glycosyltransferase 25 domain containing 1                   | 0.4669 | 0.0111 |
| 218474_s_at | KCTD5     | potassium channel tetramerisation domain containing 5        | 0.6663 | 0.0083 |
| 218478_s_at | ZCCHC8    | zinc finger; CCHC domain containing 8                        | 0.5599 | 0.0023 |
| 218484_at   | NDUFA4L2  | NADH dehydrogenase (ubiquinone) 1 alpha subcomplex; 4-like 2 | 0.9129 | 0.0057 |
| 218490_s_at | ZNF302    | zinc finger protein 302                                      | 0.7608 | 0.0071 |
| 218494_s_at | SLC2A4RG  | SLC2A4 regulator                                             | 1.2442 | 0.0026 |

|             |          |                                                                                   |        |        |
|-------------|----------|-----------------------------------------------------------------------------------|--------|--------|
| 218498_s_at | ERO1L    | ERO1-like ( <i>S. cerevisiae</i> )                                                | 1.5733 | 0.0001 |
| 218507_at   | HIG2     | hypoxia-inducible protein 2                                                       | 1.8454 | 0.0018 |
| 218515_at   | C21orf66 | chromosome 21 open reading frame 66                                               | 1.1968 | 0.0002 |
| 218520_at   | TBK1     | TANK-binding kinase 1                                                             | 0.7069 | 0.0055 |
| 218521_s_at | UBE2W    | ubiquitin-conjugating enzyme E2W (putative)                                       | 1.098  | 0.0011 |
| 218522_s_at | MAP1S    | microtubule-associated protein 1S                                                 | 0.5712 | 0.0054 |
| 218524_at   | E4F1     | E4F transcription factor 1                                                        | 0.5923 | 0.0002 |
| 218529_at   | CD320    | CD320 molecule                                                                    | 0.8384 | 0.0069 |
| 218542_at   | CEP55    | centrosomal protein 55kDa                                                         | 3.2032 | 0      |
| 218546_at   | C1orf115 | chromosome 1 open reading frame 115                                               | 1.5721 | 0.0326 |
| 218547_at   | DHDDS    | dehydrodolichyl diphosphate synthase                                              | 0.5275 | 0.0367 |
| 218564_at   | RFWD3    | ring finger and WD repeat domain 3                                                | 1.7199 | 0      |
| 218567_x_at | DPP3     | dipeptidyl-peptidase 3                                                            | 0.6963 | 0.0141 |
| 218579_s_at | DHX35    | DEAH (Asp-Glu-Ala-His) box polypeptide 35                                         | 0.6457 | 0.0014 |
| 218581_at   | ABHD4    | abhydrolase domain containing 4                                                   | 0.961  | 0.0008 |
| 218585_s_at | DTL      | denticleless homolog ( <i>Drosophila</i> )                                        | 4.1604 | 0      |
| 218586_at   | C20orf20 | chromosome 20 open reading frame 20                                               | 1.1164 | 0      |
| 218593_at   | RBM28    | RNA binding motif protein 28                                                      | 0.5691 | 0.027  |
| 218597_s_at | CISD1    | CDGSH iron sulfur domain 1                                                        | 0.4942 | 0.0493 |
| 218598_at   | RINT1    | RAD50 interactor 1                                                                | 1.0588 | 0.0001 |
| 218602_s_at | FAM29A   | family with sequence similarity 29; member A                                      | 0.4795 | 0.0231 |
| 218604_at   | LEMD3    | LEM domain containing 3                                                           | 0.7912 | 0      |
| 218610_s_at | FLJ11151 | hypothetical protein FLJ11151                                                     | 0.76   | 0.0125 |
| 218614_at   | C12orf35 | chromosome 12 open reading frame 35                                               | 0.7541 | 0.0178 |
| 218616_at   | INTS12   | integrator complex subunit 12                                                     | 0.5613 | 0.0014 |
| 218619_s_at | SUV39H1  | suppressor of variegation 3-9 homolog 1 ( <i>Drosophila</i> )                     | 0.7696 | 0.0018 |
| 218622_at   | NUP37    | nucleoporin 37kDa                                                                 | 1.3189 | 0.0002 |
| 218624_s_at | MGC2752  | hypothetical protein MGC2752                                                      | 0.778  | 0.0016 |
| 218625_at   | NRN1     | neuritin 1                                                                        | 2.4864 | 0.0062 |
| 218636_s_at | MAN1B1   | mannosidase; alpha; class 1B; member 1                                            | 0.5317 | 0.0289 |
| 218640_s_at | PLEKHF2  | pleckstrin homology domain containing; family F (with FYVE domain) member 2       | 0.6663 | 0.0291 |
| 218653_at   | SLC25A15 | solute carrier family 25 (mitochondrial carrier; ornithine transporter) member 15 | 1.4361 | 0.0032 |
| 218658_s_at | ACTR8    | ARP8 actin-related protein 8 homolog (yeast)                                      | 0.2711 | 0.0424 |
| 218662_s_at | NCAPG    | non-SMC condensin I complex; subunit G                                            | 2.2167 | 0      |
| 218663_at   | NCAPG    | non-SMC condensin I complex; subunit G                                            | 2.1819 | 0.0001 |

|             |               |                                                                        |        |        |
|-------------|---------------|------------------------------------------------------------------------|--------|--------|
| 218667_at   | PJA1          | praja 1                                                                | 0.9816 | 0.0007 |
| 218668_s_at | RAP2C         | RAP2C; member of RAS oncogene family                                   | 0.4278 | 0.0157 |
| 218669_at   | RAP2C         | RAP2C; member of RAS oncogene family                                   | 0.5142 | 0.0041 |
| 218670_at   | PUS1          | pseudouridylylase 1                                                    | 0.44   | 0.0444 |
| 218674_at   | FLJ13611      | hypothetical protein FLJ13611                                          | 0.7213 | 0.0153 |
| 218676_s_at | PCTP          | phosphatidylcholine transfer protein                                   | 0.7161 | 0.0324 |
| 218685_s_at | SMUG1         | single-strand-selective monofunctional uracil-DNA glycosylase 1        | 1.0286 | 0.0002 |
| 218705_s_at | SNX24         | sorting nexin 24                                                       | 0.5922 | 0.0173 |
| 218709_s_at | IFT52         | intraflagellar transport 52 homolog (Chlamydomonas)                    | 0.6615 | 0.0069 |
| 218714_at   | PRR14         | proline rich 14                                                        | 0.5461 | 0.0131 |
| 218719_s_at | GINS3         | GINS complex subunit 3 (Psf3 homolog)                                  | 1.1363 | 0.0015 |
| 218720_x_at | SEZ6L2        | seizure related 6 homolog (mouse)-like 2                               | 1.1901 | 0.0087 |
| 218725_at   | SLC25A22      | solute carrier family 25 (mitochondrial carrier: glutamate); member 22 | 0.5189 | 0.0456 |
| 218726_at   | DKFZp762E1312 | hypothetical protein DKFZp762E1312                                     | 1.1607 | 0.0042 |
| 218727_at   | FLJ10815      | amino acid transporter                                                 | 1.3862 | 0.0001 |
| 218734_at   | NAT11         | N-acetyltransferase 11                                                 | 1.0023 | 0.003  |
| 218741_at   | CENPM         | centromere protein M                                                   | 1.721  | 0.0008 |
| 218745_x_at | TMEM161A      | transmembrane protein 161A                                             | 0.3035 | 0.0482 |
| 218748_s_at | EXOC5         | exocyst complex component 5                                            | 1.517  | 0.0051 |
| 218751_s_at | FBXW7         | F-box and WD repeat domain containing 7                                | 1.1471 | 0.0108 |
| 218753_at   | XKR8          | XK; Kell blood group complex subunit-related family; member 8          | 0.2746 | 0.0274 |
| 218755_at   | KIF20A        | kinesin family member 20A                                              | 2.6086 | 0.0001 |
| 218757_s_at | UPF3B         | UPF3 regulator of nonsense transcripts homolog B (yeast)               | 1.688  | 0      |
| 218761_at   | RNF111        | ring finger protein 111                                                | 0.4486 | 0.0153 |
| 218762_at   | ZNF574        | zinc finger protein 574                                                | 0.5605 | 0.0015 |
| 218767_at   | REXO4         | REX4; RNA exonuclease 4 homolog (S. cerevisiae)                        | 0.3903 | 0.0078 |
| 218768_at   | NUP107        | nucleoporin 107kDa                                                     | 0.9418 | 0.0062 |
| 218769_s_at | ANKRA2        | ankyrin repeat; family A (RFXANK-like); 2                              | 0.5413 | 0.022  |
| 218775_s_at | WWC2          | WW and C2 domain containing 2                                          | 0.6964 | 0.0176 |
| 218777_at   | REEP4         | receptor accessory protein 4                                           | 1.1736 | 0      |
| 218780_at   | HOOK2         | hook homolog 2 (Drosophila)                                            | 0.2992 | 0.0312 |
| 218781_at   | SMC6          | structural maintenance of chromosomes 6                                | 1.3725 | 0.0001 |
| 218782_s_at | ATAD2         | ATPase family; AAA domain containing 2                                 | 1.9752 | 0.0012 |
| 218794_s_at | TXNL4B        | thioredoxin-like 4B                                                    | 1.1766 | 0      |
| 218798_at   | KRI1          | KRI1 homolog (S. cerevisiae)                                           | 0.4124 | 0.0029 |

|             |          |                                                                                |        |        |
|-------------|----------|--------------------------------------------------------------------------------|--------|--------|
| 218803_at   | CHFR     | checkpoint with forkhead and ring finger domains                               | 0.9713 | 0.0017 |
| 218817_at   | SPCS3    | signal peptidase complex subunit 3 homolog (S. cerevisiae)                     | 0.6574 | 0.0084 |
| 218823_s_at | KCTD9    | potassium channel tetramerisation domain containing 9                          | 0.7433 | 0.0158 |
| 218824_at   | FLJ10781 | hypothetical protein FLJ10781                                                  | 0.7089 | 0.0021 |
| 218834_s_at | TMEM132A | transmembrane protein 132A                                                     | 2.3573 | 0      |
| 218838_s_at | TTC31    | tetratricopeptide repeat domain 31                                             | 0.7058 | 0.0172 |
| 218839_at   | HEY1     | hairy/enhancer-of-split related with YRPW motif 1                              | 1.0718 | 0.0354 |
| 218842_at   | RPAP3    | RNA polymerase II associated protein 3                                         | 0.8734 | 0.0171 |
| 218848_at   | THOC6    | THO complex 6 homolog (Drosophila)                                             | 0.7319 | 0.0016 |
| 218867_s_at | C12orf49 | chromosome 12 open reading frame 49                                            | 1.2509 | 0.0004 |
| 218868_at   | ACTR3B   | ARP3 actin-related protein 3 homolog B (yeast)                                 | 0.4928 | 0.0263 |
| 218875_s_at | FBXO5    | F-box protein 5                                                                | 1.4267 | 0.0024 |
| 218883_s_at | MLF1IP   | MLF1 interacting protein                                                       | 3.7611 | 0      |
| 218884_s_at | GUF1     | GUF1 GTPase homolog (S. cerevisiae)                                            | 0.5623 | 0.0369 |
| 218888_s_at | NETO2    | neuropilin (NRP) and tolloid (TLL)-like 2                                      | 2.6291 | 0      |
| 218893_at   | ISOC2    | isochorismatase domain containing 2                                            | 0.7178 | 0.0069 |
| 218894_s_at | FLJ10292 | mago-nashi homolog 2                                                           | 0.6814 | 0.0144 |
| 218898_at   | FAM57A   | family with sequence similarity 57; member A                                   | 1.5387 | 0.0111 |
| 218904_s_at | C9orf40  | chromosome 9 open reading frame 40                                             | 1.1288 | 0.0008 |
| 218905_at   | INTS8    | integrator complex subunit 8                                                   | 1.1354 | 0      |
| 218908_at   | ASPSR1   | alveolar soft part sarcoma chromosome region; candidate 1                      | 0.6623 | 0.0117 |
| 218911_at   | YEATS4   | YEATS domain containing 4                                                      | 1.0014 | 0.0057 |
| 218916_at   | ZNF768   | zinc finger protein 768                                                        | 0.5716 | 0.0003 |
| 218920_at   | FLJ10404 | hypothetical protein FLJ10404                                                  | 1.0005 | 0.0002 |
| 218926_at   | MYNN     | myoneurin                                                                      | 0.4798 | 0.0072 |
| 218942_at   | PIP4K2C  | phosphatidylinositol-5-phosphate 4-kinase; type II; gamma                      | 0.9502 | 0.0003 |
| 218944_at   | PYCLR    | pyrroline-5-carboxylate reductase-like                                         | 0.3331 | 0.0359 |
| 218945_at   | C16orf68 | chromosome 16 open reading frame 68                                            | 0.6496 | 0.006  |
| 218947_s_at | PAPD1    | PAP associated domain containing 1                                             | 0.6014 | 0.0295 |
| 218951_s_at | PLCXD1   | phosphatidylinositol-specific phospholipase C; X domain containing 1           | 1.1859 | 0.016  |
| 218953_s_at | PCYOX1L  | prenylcysteine oxidase 1 like                                                  | 1.9904 | 0      |
| 218954_s_at | BRF2     | BRF2; subunit of RNA polymerase III transcription initiation factor; BRF1-like | 1.1046 | 0.002  |
| 218955_at   | BRF2     | BRF2; subunit of RNA polymerase III transcription initiation factor; BRF1-like | 1.0751 | 0.0009 |

|             |          |                                                                                              |        |        |
|-------------|----------|----------------------------------------------------------------------------------------------|--------|--------|
| 218956_s_at | PTCD1    | pentatricopeptide repeat domain 1                                                            | 0.6038 | 0.0029 |
| 218958_at   | C19orf60 | chromosome 19 open reading frame 60                                                          | 0.441  | 0.0376 |
| 218959_at   | HOXC10   | homeobox C10                                                                                 | 1.4038 | 0.0361 |
| 218968_s_at | ZFP64    | zinc finger protein 64 homolog (mouse)                                                       | 0.7432 | 0.0096 |
| 218971_s_at | WDR91    | WD repeat domain 91                                                                          | 0.6045 | 0.0278 |
| 218978_s_at | SLC25A37 | solute carrier family 25; member 37                                                          | 0.5863 | 0.0356 |
| 218979_at   | RMI1     | RMI1; RecQ mediated genome instability 1; homolog (S. cerevisiae)                            | 1.0605 | 0.0026 |
| 218984_at   | PUS7     | pseudouridylate synthase 7 homolog (S. cerevisiae)                                           | 0.9871 | 0.0038 |
| 218987_at   | ATF7IP   | activating transcription factor 7 interacting protein                                        | 1.0426 | 0.0026 |
| 218988_at   | SLC35E3  | solute carrier family 35; member E3                                                          | 0.8091 | 0.0039 |
| 218994_s_at | FLJ13195 | stromal antigen 3-like                                                                       | 0.5342 | 0.0193 |
| 218996_at   | TFPT     | TCF3 (E2A) fusion partner (in childhood Leukemia)                                            | 0.8149 | 0.0022 |
| 219000_s_at | DCC1     | defective in sister chromatid cohesion homolog 1 (S. cerevisiae)                             | 1.4983 | 0.0003 |
| 219003_s_at | MANEA    | mannosidase; endo-alpha                                                                      | 0.5803 | 0.0475 |
| 219004_s_at | C21orf45 | chromosome 21 open reading frame 45                                                          | 1.359  | 0.0009 |
| 219007_at   | NUP43    | nucleoporin 43kDa                                                                            | 0.5569 | 0.0002 |
| 219009_at   | C14orf93 | chromosome 14 open reading frame 93                                                          | 0.2416 | 0.0333 |
| 219022_at   | C12orf43 | chromosome 12 open reading frame 43                                                          | 0.5925 | 0.0067 |
| 219024_at   | PLEKHA1  | pleckstrin homology domain containing; family A (phosphoinositide binding specific) member 1 | 1.6553 | 0      |
| 219026_s_at | RASAL2   | RAS protein activator like 2                                                                 | 0.4451 | 0.0243 |
| 219027_s_at | MYO9A    | myosin IXA                                                                                   | 0.702  | 0.0006 |
| 219029_at   | C5orf28  | chromosome 5 open reading frame 28                                                           | 1.4338 | 0      |
| 219034_at   | PARP16   | poly (ADP-ribose) polymerase family; member 16                                               | 0.6748 | 0.0275 |
| 219035_s_at | RNF34    | ring finger protein 34                                                                       | 1.778  | 0      |
| 219045_at   | RHOF     | ras homolog gene family; member F (in filopodia)                                             | 0.8229 | 0.0327 |
| 219047_s_at | ZNF668   | zinc finger protein 668                                                                      | 0.4234 | 0.0065 |
| 219075_at   | YIPF2    | Yip1 domain family; member 2                                                                 | 0.3491 | 0.0014 |
| 219088_s_at | ZNF576   | zinc finger protein 576                                                                      | 0.6107 | 0.0126 |
| 219105_x_at | ORC6L    | origin recognition complex; subunit 6 like (yeast)                                           | 2.0352 | 0      |
| 219111_s_at | DDX54    | DEAD (Asp-Glu-Ala-Asp) box polypeptide 54                                                    | 0.4723 | 0.0192 |
| 219112_at   | RAPGEF6  | Rap guanine nucleotide exchange factor (GEF) 6                                               | 1.1122 | 0      |
| 219119_at   | LSM8     | LSM8 homolog; U6 small nuclear RNA associated (S. cerevisiae)                                | 0.3335 | 0.0417 |
| 219120_at   | C2orf44  | chromosome 2 open reading frame 44                                                           | 0.4978 | 0.0204 |
| 219122_s_at | THG1L    | tRNA-histidine guanylyltransferase 1-like (S. cerevisiae)                                    | 0.8574 | 0.035  |

|             |          |                                                                  |        |        |
|-------------|----------|------------------------------------------------------------------|--------|--------|
| 219123_at   | ZNF232   | zinc finger protein 232                                          | 0.5543 | 0.0321 |
| 219124_at   | C8orf41  | chromosome 8 open reading frame 41                               | 0.5825 | 0.0058 |
| 219136_s_at | TMEM112  | transmembrane protein 112                                        | 0.6424 | 0.0213 |
| 219145_at   | LPHN1    | latrophilin 1                                                    | 0.5253 | 0.0192 |
| 219148_at   | PBK      | PDZ binding kinase                                               | 5.1616 | 0      |
| 219149_x_at | DBR1     | debranching enzyme homolog 1 ( <i>S. cerevisiae</i> )            | 0.3489 | 0.0306 |
| 219158_s_at | NARG1    | NMDA receptor regulated 1                                        | 0.64   | 0.0468 |
| 219161_s_at | CKLF     | chemokine-like factor                                            | 0.5957 | 0.0405 |
| 219163_at   | ZNF562   | zinc finger protein 562                                          | 0.6784 | 0.0013 |
| 219175_s_at | SLC41A3  | solute carrier family 41; member 3                               | 0.9979 | 0.0216 |
| 219178_at   | QTRTD1   | queuine tRNA-ribosyltransferase domain containing 1              | 0.7334 | 0.0005 |
| 219182_at   | FLJ22167 | hypothetical protein FLJ22167                                    | 1.2105 | 0.0017 |
| 219193_at   | WDR70    | WD repeat domain 70                                              | 0.5732 | 0.0163 |
| 219201_s_at | TWSG1    | twisted gastrulation homolog 1 ( <i>Drosophila</i> )             | 1.3342 | 0.0175 |
| 219212_at   | HSPA14   | heat shock 70kDa protein 14                                      | 0.7691 | 0.0186 |
| 219230_at   | TMEM100  | transmembrane protein 100                                        | 1.8688 | 0.0099 |
| 219231_at   | TGS1     | trimethylguanosine synthase homolog ( <i>S. cerevisiae</i> )     | 0.3206 | 0.024  |
| 219233_s_at | GSDML    | gasdermin-like                                                   | 0.2347 | 0.0399 |
| 219235_s_at | PHACTR4  | phosphatase and actin regulator 4                                | 1.2261 | 0      |
| 219236_at   | PAQR6    | progesterone and adiponectin receptor family member VI           | 0.2813 | 0.0101 |
| 219237_s_at | DNAJB14  | DnaJ (Hsp40) homolog; subfamily B; member 14                     | 0.5122 | 0.0224 |
| 219239_s_at | ZNF654   | zinc finger protein 654                                          | 0.7528 | 0.0228 |
| 219240_s_at | C10orf88 | chromosome 10 open reading frame 88                              | 0.7668 | 0.0004 |
| 219245_s_at | OGFOD2   | 2-oxoglutarate and iron-dependent oxygenase domain containing 2  | 0.8347 | 0.0003 |
| 219246_s_at | OGFOD2   | 2-oxoglutarate and iron-dependent oxygenase domain containing 2  | 0.5489 | 0.0094 |
| 219249_s_at | FKBP10   | FK506 binding protein 10; 65 kDa                                 | 0.6316 | 0.0338 |
| 219251_s_at | WDR60    | WD repeat domain 60                                              | 0.664  | 0.0002 |
| 219261_at   | C7orf26  | chromosome 7 open reading frame 26                               | 0.3418 | 0.0173 |
| 219264_s_at | PPP2R3B  | protein phosphatase 2 (formerly 2A); regulatory subunit B"; beta | 0.6399 | 0.008  |
| 219268_at   | ETNK2    | ethanolamine kinase 2                                            | 1.7267 | 0.0048 |
| 219275_at   | PDCD5    | programmed cell death 5                                          | 0.5627 | 0.018  |
| 219277_s_at | OGDHL    | oxoglutarate dehydrogenase-like                                  | 1.3701 | 0.0244 |
| 219280_at   | BRWD1    | bromodomain and WD repeat domain containing 1                    | 0.4933 | 0.0177 |
| 219296_at   | ZDHHC13  | zinc finger; DHHC-type containing 13                             | 1.2796 | 0      |
| 219303_at   | C13orf7  | chromosome 13 open reading frame 7                               | 0.5355 | 0.045  |
| 219306_at   | KIF15    | kinesin family member 15                                         | 1.5872 | 0.0007 |

|             |          |                                                                                     |        |        |
|-------------|----------|-------------------------------------------------------------------------------------|--------|--------|
| 219328_at   | DDX31    | DEAD (Asp-Glu-Ala-Asp) box polypeptide 31                                           | 0.2894 | 0.0414 |
| 219346_at   | LRFN3    | leucine rich repeat and fibronectin type III domain containing 3                    | 0.4485 | 0.0091 |
| 219350_s_at | DIABLO   | diablo homolog (Drosophila)                                                         | 0.646  | 0      |
| 219351_at   | TRAPPC2  | trafficking protein particle complex 2                                              | 0.7094 | 0.0342 |
| 219355_at   | CXorf57  | chromosome X open reading frame 57                                                  | 1.0247 | 0.0486 |
| 219369_s_at | OTUB2    | OTU domain; ubiquitin aldehyde binding 2                                            | 0.2221 | 0.0255 |
| 219372_at   | IFT81    | intraflagellar transport 81 homolog (Chlamydomonas)                                 | 1.1673 | 0.0005 |
| 219376_at   | ZNF322B  | zinc finger protein 322B                                                            | 0.596  | 0.0198 |
| 219380_x_at | POLH     | polymerase (DNA directed); eta                                                      | 0.241  | 0.0442 |
| 219381_at   | FLJ13231 | hypothetical protein FLJ13231                                                       | 0.5678 | 0.0312 |
| 219384_s_at | ADAT1    | adenosine deaminase; tRNA-specific 1                                                | 1.0087 | 0.0004 |
| 219387_at   | CCDC88A  | coiled-coil domain containing 88A                                                   | 0.6746 | 0.0407 |
| 219390_at   | FKBP14   | FK506 binding protein 14; 22 kDa                                                    | 1.4319 | 0.0009 |
| 219392_x_at | PRR11    | proline rich 11                                                                     | 0.5948 | 0.0001 |
| 219402_s_at | DERL1    | Der1-like domain family; member 1                                                   | 0.5042 | 0.0241 |
| 219421_at   | TTC33    | tetratricopeptide repeat domain 33                                                  | 0.5108 | 0.0295 |
| 219428_s_at | PXMP4    | peroxisomal membrane protein 4; 24kDa                                               | 0.9536 | 0.016  |
| 219430_at   | GPR137   | G protein-coupled receptor 137                                                      | 0.1956 | 0.0439 |
| 219437_s_at | ANKRD11  | ankyrin repeat domain 11                                                            | 0.9561 | 0.0028 |
| 219439_at   | C1GALT1  | core 1 synthase; glycoprotein-N-acetylgalactosamine 3-beta-galactosyltransferase; 1 | 1.5021 | 0.0006 |
| 219445_at   | GLTSCR1  | glioma tumor suppressor candidate region gene 1                                     | 0.2916 | 0.0437 |
| 219446_at   | RIC8B    | resistance to inhibitors of cholinesterase 8 homolog B (C. elegans)                 | 0.6445 | 0.001  |
| 219447_s_at | SLC35C2  | solute carrier family 35; member C2                                                 | 0.6099 | 0.0165 |
| 219453_at   | C16orf44 | chromosome 16 open reading frame 44                                                 | 0.4243 | 0.0103 |
| 219467_at   | GIN1     | gypsy retrotransposon integrase 1                                                   | 0.6813 | 0.0348 |
| 219479_at   | KDEL1    | KDEL (Lys-Asp-Glu-Leu) containing 1                                                 | 1.2886 | 0.0009 |
| 219481_at   | TTC13    | tetratricopeptide repeat domain 13                                                  | 0.6646 | 0.0092 |
| 219482_at   | SETD4    | SET domain containing 4                                                             | 0.7394 | 0.0026 |
| 219485_s_at | PSMD10   | proteasome (prosome; macropain) 26S subunit; non-ATPase; 10                         | 0.5063 | 0.0028 |
| 219490_s_at | DCLRE1B  | DNA cross-link repair 1B (PSO2 homolog; S. cerevisiae)                              | 0.3565 | 0.0049 |
| 219493_at   | SHCBP1   | SHC SH2-domain binding protein 1                                                    | 3.5071 | 0      |
| 219494_at   | RAD54B   | RAD54 homolog B (S. cerevisiae)                                                     | 1.846  | 0.0002 |
| 219495_s_at | ZNF180   | zinc finger protein 180                                                             | 0.7177 | 0.0024 |
| 219499_at   | SEC61A2  | Sec61 alpha 2 subunit (S. cerevisiae)                                               | 0.7014 | 0.0005 |
| 219502_at   | NEIL3    | nei endonuclease VIII-like 3 (E. coli)                                              | 0.6486 | 0.0153 |

|             |          |                                                                                            |        |        |
|-------------|----------|--------------------------------------------------------------------------------------------|--------|--------|
| 219507_at   | RSRC1    | arginine/serine-rich coiled-coil 1                                                         | 1.5105 | 0.0001 |
| 219510_at   | POLQ     | polymerase (DNA directed); theta                                                           | 1.2031 | 0.0006 |
| 219514_at   | ANGPTL2  | angiopoietin-like 2                                                                        | 0.5953 | 0.008  |
| 219515_at   | PRDM10   | PR domain containing 10                                                                    | 0.4985 | 0.0082 |
| 219530_at   | PALB2    | partner and localizer of BRCA2                                                             | 1.4582 | 0      |
| 219531_at   | CEP72    | centrosomal protein 72kDa                                                                  | 0.751  | 0.0135 |
| 219532_at   | ELOVL4   | elongation of very long chain fatty acids (FEN1/Elo2; SUR4/Elo3; yeast)-like 4             | 2.0176 | 0.0009 |
| 219540_at   | ZNF267   | zinc finger protein 267                                                                    | 0.735  | 0.0436 |
| 219544_at   | C13orf34 | chromosome 13 open reading frame 34                                                        | 1.066  | 0.0042 |
| 219548_at   | ZNF16    | zinc finger protein 16                                                                     | 0.5768 | 0.0001 |
| 219555_s_at | CENPN    | centromere protein N                                                                       | 1.6133 | 0.0038 |
| 219556_at   | C16orf59 | chromosome 16 open reading frame 59                                                        | 0.3488 | 0.0005 |
| 219558_at   | ATP13A3  | ATPase type 13A3                                                                           | 0.7167 | 0.0312 |
| 219567_s_at | C1orf176 | chromosome 1 open reading frame 176                                                        | 0.3269 | 0.0015 |
| 219571_s_at | ZNF12    | zinc finger protein 12                                                                     | 1.1095 | 0      |
| 219577_s_at | ABCA7    | ATP-binding cassette; sub-family A (ABC1); member 7                                        | 0.343  | 0.0213 |
| 219588_s_at | NCAPG2   | non-SMC condensin II complex; subunit G2                                                   | 2.4622 | 0      |
| 219595_at   | ZNF26    | zinc finger protein 26                                                                     | 0.8151 | 0.0043 |
| 219596_at   | THAP10   | THAP domain containing 10                                                                  | 1.7376 | 0.0004 |
| 219608_s_at | FBXO38   | F-box protein 38                                                                           | 0.778  | 0.0105 |
| 219611_s_at | CCDC21   | coiled-coil domain containing 21                                                           | 0.7819 | 0.0026 |
| 219618_at   | IRAK4    | interleukin-1 receptor-associated kinase 4                                                 | 0.6098 | 0.0101 |
| 219623_at   | ACTR5    | ARP5 actin-related protein 5 homolog (yeast)                                               | 0.5992 | 0.0063 |
| 219624_at   | BAG4     | BCL2-associated athanogene 4                                                               | 0.4453 | 0.0292 |
| 219625_s_at | COL4A3BP | collagen; type IV; alpha 3 (Goodpasture antigen) binding protein                           | 1      | 0      |
| 219627_at   | ZNF767   | zinc finger family member 767                                                              | 0.6396 | 0.0066 |
| 219631_at   | LRP12    | low density lipoprotein-related protein 12                                                 | 0.9513 | 0.0264 |
| 219635_at   | ZNF606   | zinc finger protein 606                                                                    | 1.2064 | 0.0006 |
| 219640_at   | CLDN15   | claudin 15                                                                                 | 0.7041 | 0.0003 |
| 219644_at   | CCDC41   | coiled-coil domain containing 41                                                           | 1.4092 | 0.0004 |
| 219650_at   | ERCC6L   | excision repair cross-complementing rodent repair deficiency; complementation group 6-like | 0.6844 | 0.01   |
| 219653_at   | LSM14B   | LSM14B; SCD6 homolog B (S. cerevisiae)                                                     | 0.4483 | 0.0021 |
| 219658_at   | PTCD2    | pentatricopeptide repeat domain 2                                                          | 0.8744 | 0.0002 |
| 219678_x_at | DCLRE1C  | DNA cross-link repair 1C (PSO2 homolog; S. cerevisiae)                                     | 1.0147 | 0      |
| 219690_at   | TMEM149  | transmembrane protein 149                                                                  | 0.528  | 0.027  |



|             |           |                                                                                               |        |        |
|-------------|-----------|-----------------------------------------------------------------------------------------------|--------|--------|
| 219691_at   | SAMD9     | sterile alpha motif domain containing 9                                                       | 0.7877 | 0.0358 |
| 219693_at   | AGPAT4    | 1-acylglycerol-3-phosphate O-acyltransferase 4 (lysophosphatidic acid acyltransferase; delta) | 0.6357 | 0.0453 |
| 219698_s_at | METTL4    | methyltransferase like 4                                                                      | 0.4764 | 0.0237 |
| 219703_at   | MNS1      | meiosis-specific nuclear structural 1                                                         | 0.8785 | 0.0042 |
| 219715_s_at | TDP1      | tyrosyl-DNA phosphodiesterase 1                                                               | 0.7222 | 0.0009 |
| 219717_at   | C4orf30   | chromosome 4 open reading frame 30                                                            | 1.2653 | 0.0047 |
| 219719_at   | HIGD1B    | HIG1 domain family; member 1B                                                                 | 0.6289 | 0.0023 |
| 219720_s_at | C14orf118 | chromosome 14 open reading frame 118                                                          | 0.218  | 0.0486 |
| 219736_at   | TRIM36    | tripartite motif-containing 36                                                                | 1.2831 | 0.0099 |
| 219742_at   | PRR7      | proline rich 7 (synaptic)                                                                     | 0.8138 | 0.0069 |
| 219753_at   | STAG3     | stromal antigen 3                                                                             | 1.1137 | 0.0026 |
| 219754_at   | RBM41     | RNA binding motif protein 41                                                                  | 0.7977 | 0.046  |
| 219757_s_at | C14orf101 | chromosome 14 open reading frame 101                                                          | 0.8881 | 0.0011 |
| 219758_at   | TTC26     | tetratricopeptide repeat domain 26                                                            | 0.4854 | 0.01   |
| 219760_at   | LIN7B     | lin-7 homolog B (C. elegans)                                                                  | 0.6289 | 0.0022 |
| 219763_at   | DENND1A   | DENN/MADD domain containing 1A                                                                | 0.5706 | 0.0419 |
| 219786_at   | MTL5      | metallothionein-like 5; testis-specific (tesmin)                                              | 0.2197 | 0.0054 |
| 219787_s_at | ECT2      | epithelial cell transforming sequence 2 oncogene                                              | 3.2749 | 0      |
| 219789_at   | NPR3      | natriuretic peptide receptor C/guanylate cyclase C (atrionatriuretic peptide receptor C)      | 1.5682 | 0.0181 |
| 219793_at   | SNX16     | sorting nexin 16                                                                              | 0.6137 | 0.0292 |
| 219801_at   | ZNF34     | zinc finger protein 34                                                                        | 0.5951 | 0.0002 |
| 219817_at   | C12orf47  | chromosome 12 open reading frame 47                                                           | 0.8577 | 0.0004 |
| 219818_s_at | GPATCH1   | G patch domain containing 1                                                                   | 1.3536 | 0      |
| 219826_at   | ZNF419    | zinc finger protein 419                                                                       | 1.1028 | 0      |
| 219828_at   | C9orf86   | chromosome 9 open reading frame 86                                                            | 0.4034 | 0.0058 |
| 219831_at   | CDKL3     | cyclin-dependent kinase-like 3                                                                | 0.3456 | 0.0339 |
| 219832_s_at | HOXC13    | homeobox C13                                                                                  | 0.5477 | 0.019  |
| 219843_at   | IPP       | intracisternal A particle-promoted polypeptide                                                | 1.1019 | 0.0003 |
| 219844_at   | C10orf118 | chromosome 10 open reading frame 118                                                          | 0.3261 | 0.0021 |
| 219846_at   | GON4L     | gon-4-like (C. elegans)                                                                       | 0.3206 | 0.0397 |
| 219854_at   | ZNF14     | zinc finger protein 14                                                                        | 0.7791 | 0.0269 |
| 219862_s_at | NARF      | nuclear prelamin A recognition factor                                                         | 0.6551 | 0.0369 |
| 219869_s_at | SLC39A8   | solute carrier family 39 (zinc transporter); member 8                                         | 1.3259 | 0.0024 |
| 219880_at   |           |                                                                                               | 1.2915 | 0      |
| 219881_s_at |           |                                                                                               | 0.5226 | 0.0001 |
| 219884_at   | LHX6      | LIM homeobox 6                                                                                | 0.5125 | 0.0017 |

|             |          |                                                                                 |        |        |
|-------------|----------|---------------------------------------------------------------------------------|--------|--------|
| 219886_at   | LRRIQ2   | leucine-rich repeats and IQ motif containing 2                                  | 0.3659 | 0.0012 |
| 219894_at   | MAGEL2   | MAGE-like 2                                                                     | 2.0793 | 0.0082 |
| 219900_s_at | ZNF446   | zinc finger protein 446                                                         | 0.2721 | 0.0149 |
| 219917_at   | ZCCHC4   | zinc finger; CCHC domain containing 4                                           | 0.2811 | 0.0488 |
| 219918_s_at | ASPM     | asp (abnormal spindle) homolog; microcephaly associated (Drosophila)            | 4.1799 | 0      |
| 219925_at   | ZMYM6    | zinc finger; MYM-type 6                                                         | 0.395  | 0.0332 |
| 219931_s_at | KLHL12   | kelch-like 12 (Drosophila)                                                      | 0.84   | 0.0074 |
| 219935_at   | ADAMTS5  | ADAM metallopeptidase with thrombospondin type 1 motif; 5 (aggrecanase-2)       | 1.1778 | 0.036  |
| 219941_at   | TMEM19   | transmembrane protein 19                                                        | 0.2187 | 0.0152 |
| 219951_s_at | C20orf12 | chromosome 20 open reading frame 12                                             | 1.7072 | 0.0049 |
| 219958_at   | C20orf46 | chromosome 20 open reading frame 46                                             | 1.1918 | 0.0081 |
| 219978_s_at | NUSAP1   | nucleolar and spindle associated protein 1                                      | 1.6042 | 0.0023 |
| 219980_at   | C4orf29  | chromosome 4 open reading frame 29                                              | 0.5189 | 0.0171 |
| 219981_x_at | ZNF587   | zinc finger protein 587                                                         | 0.9283 | 0      |
| 219983_at   | HRASLS   | HRAS-like suppressor                                                            | 1.2041 | 0.0079 |
| 219984_s_at | HRASLS   | HRAS-like suppressor                                                            | 0.859  | 0.0248 |
| 219990_at   | E2F8     | E2F transcription factor 8                                                      | 1.155  | 0.0007 |
| 219997_s_at | COPS7B   | COP9 constitutive photomorphogenic homolog subunit 7B (Arabidopsis)             | 0.3984 | 0.0498 |
| 220011_at   | C1orf135 | chromosome 1 open reading frame 135                                             | 0.6399 | 0.0155 |
| 220019_s_at | ZNF224   | zinc finger protein 224                                                         | 0.7766 | 0.0004 |
| 220022_at   | ZNF334   | zinc finger protein 334                                                         | 0.9986 | 0.0296 |
| 220032_at   | FLJ21986 | hypothetical protein FLJ21986                                                   | 0.5725 | 0.0471 |
| 220036_s_at | LMBR1L   | limb region 1 homolog (mouse)-like                                              | 1.1342 | 0.0002 |
| 220047_at   | SIRT4    | sirtuin (silent mating type information regulation 2 homolog) 4 (S. cerevisiae) | 0.5964 | 0.0106 |
| 220055_at   | ZNF287   | zinc finger protein 287                                                         | 0.2095 | 0.0395 |
| 220056_at   | IL22RA1  | interleukin 22 receptor; alpha 1                                                | 0.3482 | 0.0263 |
| 220060_s_at | C12orf48 | chromosome 12 open reading frame 48                                             | 1.4626 | 0.0001 |
| 220063_at   | GSTCD    | glutathione S-transferase; C-terminal domain containing                         | 0.3863 | 0      |
| 220071_x_at | CEP27    | centrosomal protein 27kDa                                                       | 0.3051 | 0.0072 |
| 220072_at   | CSPP1    | centrosome and spindle pole associated protein 1                                | 0.6443 | 0.0009 |
| 220085_at   | HELLS    | helicase; lymphoid-specific                                                     | 2.2126 | 0.0002 |
| 220089_at   | L2HGDH   | L-2-hydroxyglutarate dehydrogenase                                              | 0.4956 | 0      |
| 220091_at   | SLC2A6   | solute carrier family 2 (facilitated glucose transporter); member 6             | 1.1197 | 0.0382 |
| 220099_s_at | LUC7L2   | LUC7-like 2 (S. cerevisiae)                                                     | 0.3425 | 0.0104 |

|             |           |                                                                                                                                                                                                                                                                          |        |        |
|-------------|-----------|--------------------------------------------------------------------------------------------------------------------------------------------------------------------------------------------------------------------------------------------------------------------------|--------|--------|
| 220113_x_at | POLR1B    | polymerase (RNA) I polypeptide B; 128kDa                                                                                                                                                                                                                                 | 0.6264 | 0.0008 |
| 220121_at   | LINS1     | lines homolog 1 (Drosophila)                                                                                                                                                                                                                                             | 0.5237 | 0.0079 |
| 220127_s_at | FBXL12    | F-box and leucine-rich repeat protein 12                                                                                                                                                                                                                                 | 0.4739 | 0.0112 |
| 220144_s_at | ANKRD5    | ankyrin repeat domain 5                                                                                                                                                                                                                                                  | 0.7067 | 0.0023 |
| 220155_s_at | BRD9      | bromodomain containing 9                                                                                                                                                                                                                                                 | 0.8804 | 0.0111 |
| 220172_at   | C2orf37   | chromosome 2 open reading frame 37                                                                                                                                                                                                                                       | 0.5042 | 0.0392 |
| 220178_at   | C19orf28  | chromosome 19 open reading frame 28                                                                                                                                                                                                                                      | 0.577  | 0.026  |
| 220200_s_at | LOC647597 | SET domain containing (lysine methyltransferase) 8, similar to Histone-lysine N-methyltransferase; H4 lysine-20 specific (Histone H4-K20 methyltransferase) (H4-K20-HMTase) (SET domain-containing protein 8) (PR/SET domain-containing protein 07) (PR/SET07) (PR-Set7) | 0.7663 | 0.0012 |
| 220202_s_at | RC3H2     | ring finger and CCCH-type zinc finger domains 2                                                                                                                                                                                                                          | 1.146  | 0.0003 |
| 220215_at   | ZNF669    | zinc finger protein 669                                                                                                                                                                                                                                                  | 0.3249 | 0.0181 |
| 220216_at   | C8orf44   | chromosome 8 open reading frame 44                                                                                                                                                                                                                                       | 0.2615 | 0.0195 |
| 220219_s_at | LOC728863 | hypothetical protein LOC728863, leucine rich repeat containing 37; member A2, leucine rich repeat containing 37; member A3, leucine rich repeat containing 37; member A4 (pseudogene), leucine rich repeat containing 37A                                                | 0.2578 | 0.0343 |
| 220221_at   | VPS13D    | vacuolar protein sorting 13 homolog D (S. cerevisiae)                                                                                                                                                                                                                    | 0.3839 | 0.0349 |
| 220232_at   | SCD5      | stearoyl-CoA desaturase 5                                                                                                                                                                                                                                                | 0.4723 | 0.0068 |
| 220235_s_at | C1orf103  | chromosome 1 open reading frame 103                                                                                                                                                                                                                                      | 1.2965 | 0      |
| 220236_at   | PDPR      | pyruvate dehydrogenase phosphatase regulatory subunit                                                                                                                                                                                                                    | 0.268  | 0.0054 |
| 220238_s_at | KLHL7     | kelch-like 7 (Drosophila)                                                                                                                                                                                                                                                | 1.1939 | 0.0058 |
| 220239_at   | KLHL7     | kelch-like 7 (Drosophila)                                                                                                                                                                                                                                                | 1.2219 | 0.0028 |
| 220242_x_at | ZNF701    | zinc finger protein 701                                                                                                                                                                                                                                                  | 0.2887 | 0.004  |
| 220250_at   | ZNF286A   | zinc finger protein 286A                                                                                                                                                                                                                                                 | 0.1575 | 0.0435 |
| 220252_x_at | CXorf21   | chromosome X open reading frame 21                                                                                                                                                                                                                                       | 0.2192 | 0.0496 |
| 220253_s_at | LRP12     | low density lipoprotein-related protein 12                                                                                                                                                                                                                               | 0.9518 | 0.043  |
| 220278_at   | JMJD2D    | jumonji domain containing 2D                                                                                                                                                                                                                                             | 0.1962 | 0.0029 |
| 220285_at   | FAM108B1  | family with sequence similarity 108; member B1                                                                                                                                                                                                                           | 0.7606 | 0.0134 |
| 220295_x_at | DEPDC1    | DEP domain containing 1, similar to DEP domain containing 1                                                                                                                                                                                                              | 1.2933 | 0.0145 |
| 220305_at   | MGC3260   | hypothetical protein MGC3260                                                                                                                                                                                                                                             | 0.7669 | 0.0023 |
| 220336_s_at | GP6       | glycoprotein VI (platelet)                                                                                                                                                                                                                                               | 0.2175 | 0.0016 |
| 220338_at   | RALGPS2   | Ral GEF with PH domain and SH3 binding motif 2                                                                                                                                                                                                                           | 0.3989 | 0.024  |

|             |              |                                                                                                |        |        |
|-------------|--------------|------------------------------------------------------------------------------------------------|--------|--------|
| 220340_at   | KIAA1772     | KIAA1772                                                                                       | 1.0324 | 0.0166 |
| 220352_x_at |              |                                                                                                | 0.3685 | 0.0099 |
| 220360_at   | THAP9        | THAP domain containing 9                                                                       | 0.2334 | 0.0356 |
| 220361_at   | IQCH         | IQ motif containing H                                                                          | 0.3748 | 0.0009 |
| 220371_s_at | SLC12A9      | solute carrier family 12 (potassium/chloride transporters); member 9                           | 0.2498 | 0.0447 |
| 220401_at   | FLJ21369     | hypothetical protein FLJ21369                                                                  | 0.2647 | 0.0117 |
| 220410_s_at | CAMSAP1      | calmodulin regulated spectrin-associated protein 1                                             | 0.2203 | 0.0186 |
| 220411_x_at | PODNL1       | podocan-like 1                                                                                 | 0.1772 | 0.0153 |
| 220434_at   | ADCK4        | aarF domain containing kinase 4                                                                | 0.2952 | 0.0005 |
| 220435_at   | SLC30A10     | solute carrier family 30; member 10                                                            | 3.3101 | 0.001  |
| 220451_s_at | BIRC7        | baculoviral IAP repeat-containing 7 (livin)                                                    | 1.792  | 0.0093 |
| 220456_at   | SPTLC3       | serine palmitoyltransferase; long chain base subunit 3                                         | 0.3094 | 0.0078 |
| 220458_at   | FLJ10246     | FLJ10246                                                                                       | 0.3561 | 0.0084 |
| 220459_at   | MCM3APAS     | minichromosome maintenance complex component 3 associated protein antisense                    | 1.0503 | 0.0332 |
| 220466_at   | CCDC15       | coiled-coil domain containing 15                                                               | 0.2671 | 0.0074 |
| 220467_at   | FLJ21272     | hypothetical protein FLJ21272                                                                  | 1.0434 | 0.0232 |
| 220512_at   | DLC1         | deleted in liver cancer 1                                                                      | 1.3634 | 0.0063 |
| 220549_at   | RAD54B       | RAD54 homolog B ( <i>S. cerevisiae</i> )                                                       | 0.2626 | 0.0395 |
| 220561_at   | IGF2AS       | insulin-like growth factor 2 antisense                                                         | 0.5601 | 0.0027 |
| 220572_at   | DKFZp547G183 | hypothetical protein DKFZp547G183                                                              | 0.3101 | 0.0054 |
| 220574_at   | SEMA6D       | sema domain; transmembrane domain (TM); and cytoplasmic domain; (semaphorin) 6D                | 0.203  | 0.0163 |
| 220586_at   | CHD9         | chromodomain helicase DNA binding protein 9                                                    | 0.531  | 0.004  |
| 220613_s_at | SYTL2        | synaptotagmin-like 2                                                                           | 1.0817 | 0.0491 |
| 220619_at   | CHD7         | chromodomain helicase DNA binding protein 7                                                    | 0.1058 | 0.0161 |
| 220632_s_at | POMT2        | protein-O-mannosyltransferase 2                                                                | 0.3209 | 0.006  |
| 220642_x_at | GPR89A       | G protein-coupled receptor 89A, G protein-coupled receptor 89B, G protein-coupled receptor 89C | 0.6512 | 0.0039 |
| 220651_s_at | MCM10        | minichromosome maintenance complex component 10                                                | 1.1309 | 0.008  |
| 220652_at   | KIF24        | kinesin family member 24                                                                       | 0.1533 | 0.022  |
| 220661_s_at | ZNF692       | zinc finger protein 692                                                                        | 1.0093 | 0.0022 |
| 220666_at   |              |                                                                                                | 0.6199 | 0.0267 |
| 220668_s_at | DNMT3B       | DNA (cytosine-5-)-methyltransferase 3 beta                                                     | 0.436  | 0.0003 |
| 220674_at   | FLJ22814     | hypothetical protein FLJ22814                                                                  | 0.1528 | 0.0408 |
| 220691_at   |              | Clone HQ0097 PRO0097                                                                           | 0.156  | 0.0465 |
| 220702_at   |              |                                                                                                | 0.8625 | 0.0009 |

|             |          |                                                                        |        |        |
|-------------|----------|------------------------------------------------------------------------|--------|--------|
| 220707_s_at | FOXRED2  | FAD-dependent oxidoreductase domain containing 2                       | 0.5706 | 0.0376 |
| 220710_at   | C15orf28 | chromosome 15 open reading frame 28                                    | 0.2263 | 0.0429 |
| 220711_at   |          |                                                                        | 0.3169 | 0.029  |
| 220715_at   | FLJ12547 | hypothetical protein FLJ12547                                          | 0.2793 | 0.0019 |
| 220716_at   | FLJ12595 | guanine nucleotide binding protein-like 3 (nucleolar)-like pseudogene  | 0.297  | 0.0005 |
| 220720_x_at | FAM128B  | family with sequence similarity 128; member B                          | 0.5059 | 0.0087 |
| 220728_at   |          |                                                                        | 0.5398 | 0.0119 |
| 220735_s_at | SENP7    | SUMO1/sentrin specific peptidase 7                                     | 0.5685 | 0.0156 |
| 220746_s_at | UIMC1    | ubiquitin interaction motif containing 1                               | 0.6188 | 0.0089 |
| 220750_s_at | LEPRE1   | leucine proline-enriched proteoglycan (leprecan) 1                     | 1.0903 | 0.0025 |
| 220760_x_at | ZNF665   | zinc finger protein 665                                                | 0.7347 | 0.0037 |
| 220761_s_at | TAOK3    | TAO kinase 3                                                           | 0.5458 | 0.0112 |
| 220768_s_at | CSNK1G3  | casein kinase 1; gamma 3                                               | 0.5396 | 0.0372 |
| 220770_s_at | LOC63920 | transposon-derived Buster3 transposase-like                            | 2.3204 | 0      |
| 220789_s_at | TBRG4    | transforming growth factor beta regulator 4                            | 0.7279 | 0      |
| 220796_x_at | SLC35E1  | solute carrier family 35; member E1                                    | 0.548  | 0.0022 |
| 220800_s_at | TMOD3    | tropomodulin 3 (ubiquitous)                                            | 0.9702 | 0.0112 |
| 220803_at   | STAMBPL1 | STAM binding protein-like 1                                            | 0.2221 | 0.02   |
| 220828_s_at | FLJ11292 | hypothetical protein FLJ11292                                          | 0.1999 | 0.0112 |
| 220838_at   | FLJ20433 | hypothetical protein FLJ20433                                          | 0.1474 | 0.0283 |
| 220840_s_at | C1orf112 | chromosome 1 open reading frame 112                                    | 0.6732 | 0.0042 |
| 220855_at   |          | Clone HQ0456 PRO0456                                                   | 0.262  | 0.0413 |
| 220864_s_at | NDUFA13  | NADH dehydrogenase (ubiquinone) 1 alpha subcomplex; 13                 | 0.2798 | 0.0163 |
| 220865_s_at | PDSS1    | prenyl (decaprenyl) diphosphate synthase; subunit 1                    | 0.7398 | 0.0147 |
| 220878_at   |          |                                                                        | 0.1042 | 0.0153 |
| 220890_s_at | DDX47    | DEAD (Asp-Glu-Ala-Asp) box polypeptide 47                              | 0.3436 | 0.0124 |
| 220900_at   | FLJ12078 | hypothetical protein FLJ12078                                          | 0.1812 | 0.0275 |
| 220905_at   |          |                                                                        | 0.2657 | 0.0092 |
| 220925_at   | MAK10    | MAK10 homolog; amino-acid N-acetyltransferase subunit; (S. cerevisiae) | 0.739  | 0.0035 |
| 220935_s_at | CDK5RAP2 | CDK5 regulatory subunit associated protein 2                           | 0.5644 | 0.0325 |
| 220940_at   | KIAA1641 | KIAA1641                                                               | 2.4313 | 0      |
| 220954_s_at | PILRB    | paired immunoglobulin-like type 2 receptor beta                        | 1.0119 | 0.0032 |
| 220955_x_at | RAB23    | RAB23; member RAS oncogene family                                      | 1.0805 | 0.0047 |
| 220967_s_at | ZNF696   | zinc finger protein 696                                                | 0.3261 | 0.0012 |
| 220969_s_at |          |                                                                        | 0.7215 | 0.0095 |
| 220974_x_at | SFXN3    | sideroflexin 3                                                         | 1.414  | 0.0024 |

|             |               |                                                                                  |        |        |
|-------------|---------------|----------------------------------------------------------------------------------|--------|--------|
| 220980_s_at | ADPGK         | ADP-dependent glucokinase                                                        | 0.436  | 0.0042 |
| 220985_s_at | RNF170        | ring finger protein 170                                                          | 0.6251 | 0.005  |
| 220986_s_at | TIGD6         | tigger transposable element derived 6                                            | 0.2681 | 0.0286 |
| 220987_s_at | C11orf17      | NUAK family; SNF1-like kinase; 2, chromosome 11 open reading frame 17            | 0.5897 | 0.0438 |
| 220991_s_at | RNF32         | ring finger protein 32                                                           | 0.2356 | 0.0373 |
| 221004_s_at | ITM2C         | integral membrane protein 2C                                                     | 0.894  | 0.0389 |
| 221006_s_at | SNX27         | sorting nexin family member 27                                                   | 0.5549 | 0.0417 |
| 221007_s_at | FIP1L1        | FIP1 like 1 (S. cerevisiae)                                                      | 0.634  | 0.002  |
| 221011_s_at | LBH           | limb bud and heart development homolog (mouse)                                   | 1.2253 | 0.0188 |
| 221021_s_at | CTNBL1        | catenin; beta like 1                                                             | 0.5003 | 0.0003 |
| 221025_x_at | PUS7L         | pseudouridylylase synthase 7 homolog (S. cerevisiae)-like                        | 0.5271 | 0.0161 |
| 221027_s_at | PLA2G12A      | phospholipase A2; group X1IA                                                     | 0.6518 | 0.037  |
| 221030_s_at | ARHGAP24      | Rho GTPase activating protein 24                                                 | 0.4952 | 0.0387 |
| 221039_s_at | DDEF1         | development and differentiation enhancing factor 1                               | 1.0408 | 0.0005 |
| 221041_s_at | SLC17A5       | solute carrier family 17 (anion/sugar transporter); member 5                     | 1.4563 | 0.0041 |
| 221050_s_at | GTPBP2        | GTP binding protein 2                                                            | 0.9457 | 0.0027 |
| 221058_s_at | CKLF          | chemokine-like factor                                                            | 0.6279 | 0.0024 |
| 221064_s_at | C16orf28      | chromosome 16 open reading frame 28                                              | 0.6136 | 0.0472 |
| 221071_at   |               |                                                                                  | 0.191  | 0.0194 |
| 221094_s_at | ELP3          | elongation protein 3 homolog (S. cerevisiae)                                     | 0.6544 | 0.0128 |
| 221123_x_at | ZNF395        | zinc finger protein 395                                                          | 1.2978 | 0.0021 |
| 221125_s_at | KCNMB3        | potassium large conductance calcium-activated channel; subfamily M beta member 3 | 0.3652 | 0      |
| 221135_s_at | ASTE1         | asteroid homolog 1 (Drosophila)                                                  | 0.6868 | 0.043  |
| 221139_s_at | CSAD          | cysteine sulfinic acid decarboxylase                                             | 0.8931 | 0.0013 |
| 221191_at   | DKFZP434A0131 | DKFZp434A0131 protein                                                            | 0.5292 | 0.0009 |
| 221192_x_at | MFSD11        | major facilitator superfamily domain containing 11                               | 0.2732 | 0.0056 |
| 221201_s_at | ZNF155        | zinc finger protein 155                                                          | 0.2886 | 0.0476 |
| 221203_s_at | YEATS2        | YEATS domain containing 2                                                        | 0.9338 | 0.0001 |
| 221206_at   | PMS2          | PMS2 postmeiotic segregation increased 2 (S. cerevisiae)                         | 1.0457 | 0      |
| 221220_s_at | SCYL2         | SCY1-like 2 (S. cerevisiae)                                                      | 1.8327 | 0.0001 |
| 221248_s_at | WHSC1L1       | Wolf-Hirschhorn syndrome candidate 1-like 1                                      | 0.1936 | 0.0154 |
| 221258_s_at | KIF18A        | kinesin family member 18A                                                        | 1.6283 | 0.0001 |
| 221260_s_at | FAM130A1      | family with sequence similarity 130; member A1                                   | 1.2976 | 0      |
| 221262_s_at | SLC2A11       | solute carrier family 2 (facilitated glucose transporter); member 11             | 0.2482 | 0.0359 |
| 221268_s_at | SGPP1         | sphingosine-1-phosphate phosphatase 1                                            | 1.2501 | 0.0312 |

|             |               |                                                                                                                     |        |        |
|-------------|---------------|---------------------------------------------------------------------------------------------------------------------|--------|--------|
| 221270_s_at | QTRT1         | queuine tRNA-ribosyltransferase 1 (tRNA-guanine transglycosylase)                                                   | 0.3817 | 0.0352 |
| 221274_s_at | LMAN2L        | lectin; mannose-binding 2-like                                                                                      | 0.4507 | 0.0294 |
| 221275_s_at |               |                                                                                                                     | 0.2494 | 0.0002 |
| 221290_s_at | MUM1          | melanoma associated antigen (mutated) 1                                                                             | 0.8159 | 0.0062 |
| 221291_at   | ULBP2         | UL16 binding protein 2                                                                                              | 0.736  | 0.0209 |
| 221335_x_at | C19orf61      | chromosome 19 open reading frame 61                                                                                 | 1.1894 | 0      |
| 221406_s_at | C6orf26       | chromosome 6 open reading frame 26, mutS homolog 5 (E. coli)                                                        | 0.1837 | 0.025  |
| 221412_at   | VN1R1         | vomeronal 1 receptor 1                                                                                              | 0.2632 | 0.0046 |
| 221419_s_at |               |                                                                                                                     | 0.2739 | 0.0329 |
| 221423_s_at | YIPF5         | Yip1 domain family; member 5                                                                                        | 1.3473 | 0.0065 |
| 221436_s_at | CDCA3         | cell division cycle associated 3                                                                                    | 1.4962 | 0.0077 |
| 221480_at   | HNRPD         | heterogeneous nuclear ribonucleoprotein D (AU-rich element RNA binding protein 1; 37kDa)                            | 1.1692 | 0.0011 |
| 221501_x_at | LOC339047     | hypothetical protein LOC339047                                                                                      | 0.6771 | 0.0007 |
| 221506_s_at | TNPO2         | transportin 2 (importin 3; karyopherin beta 2b)                                                                     | 0.6892 | 0.0001 |
| 221507_at   | TNPO2         | transportin 2 (importin 3; karyopherin beta 2b)                                                                     | 0.5359 | 0.0019 |
| 221509_at   | DENR          | density-regulated protein                                                                                           | 0.5931 | 0      |
| 221520_s_at | CDCA8         | cell division cycle associated 8                                                                                    | 1.6215 | 0.0006 |
| 221521_s_at | GIN52         | GIN5 complex subunit 2 (Psf2 homolog)                                                                               | 2.4972 | 0      |
| 221522_at   | ANKRD27       | ankyrin repeat domain 27 (VPS9 domain)                                                                              | 1.0308 | 0.0001 |
| 221529_s_at | PLVAP         | plasmalemma vesicle associated protein                                                                              | 0.8373 | 0.03   |
| 221539_at   | EIF4EBP1      | eukaryotic translation initiation factor 4E binding protein 1                                                       | 1.7392 | 0.0002 |
| 221540_x_at | DKFZP686M0199 | general transcription factor IIH; polypeptide 2; 44kDa, general transcription factor IIH; polypeptide 2; 44kDa-like | 0.698  | 0.0001 |
| 221545_x_at | MED16         | mediator complex subunit 16                                                                                         | 0.6783 | 0.0001 |
| 221560_at   | MARK4         | MAP/microtubule affinity-regulating kinase 4                                                                        | 0.4213 | 0.0187 |
| 221572_s_at | SLC26A6       | solute carrier family 26; member 6                                                                                  | 0.9144 | 0.0069 |
| 221573_at   | C7orf25       | chromosome 7 open reading frame 25                                                                                  | 0.664  | 0.0037 |
| 221583_s_at | KCNMA1        | potassium large conductance calcium-activated channel; subfamily M; alpha member 1                                  | 0.4443 | 0.0456 |
| 221591_s_at | FAM64A        | family with sequence similarity 64; member A                                                                        | 1.4027 | 0.0021 |
| 221592_at   | TBC1D8        | TBC1 domain family; member 8 (with GRAM domain)                                                                     | 0.1702 | 0.0139 |
| 221595_at   |               |                                                                                                                     | 0.5937 | 0.0021 |
| 221597_s_at | HSPC171       | HSPC171 protein                                                                                                     | 0.494  | 0.0223 |
| 221598_s_at | MED27         | mediator complex subunit 27                                                                                         | 0.7028 | 0.0056 |

|             |          |                                                        |        |        |
|-------------|----------|--------------------------------------------------------|--------|--------|
| 221625_at   |          | CDNA FLJ46609 fis; clone TKIDN2010200                  | 0.3003 | 0.0008 |
| 221628_s_at | N-PAC    | cytokine-like nuclear factor n-pac                     | 0.5563 | 0.0087 |
| 221638_s_at | STX16    | syntaxin 16                                            | 0.5099 | 0.0155 |
| 221645_s_at | ZNF83    | zinc finger protein 83                                 | 0.6865 | 0.0196 |
| 221667_s_at | HSPB8    | heat shock 22kDa protein 8                             | 2.6407 | 0.0058 |
| 221673_s_at | CSNK1G1  | casein kinase 1; gamma 1                               | 0.2577 | 0.0051 |
| 221676_s_at | CORO1C   | coronin; actin binding protein; 1C                     | 1.0178 | 0.0037 |
| 221677_s_at | DONSON   | downstream neighbor of SON                             | 2.239  | 0      |
| 221683_s_at | CEP290   | centrosomal protein 290kDa                             | 1.1481 | 0.0011 |
| 221685_s_at | CCDC99   | coiled-coil domain containing 99                       | 1.8861 | 0      |
| 221691_x_at | NPM1     | nucleophosmin (nucleolar phosphoprotein B23; numatrin) | 0.5996 | 0.0066 |
| 221695_s_at | MAP3K2   | mitogen-activated protein kinase kinase kinase 2       | 0.6276 | 0.0084 |
| 221703_at   | BRIP1    | BRCA1 interacting protein C-terminal helicase 1        | 0.6278 | 0.0015 |
| 221705_s_at | SIKE     | suppressor of IKK epsilon                              | 1.1995 | 0.0004 |
| 221728_x_at | XIST     | X (inactive)-specific transcript                       | 2.7532 | 0.0489 |
| 221729_at   | COL5A2   | collagen; type V; alpha 2                              | 1.8911 | 0.0069 |
| 221730_at   | COL5A2   | collagen; type V; alpha 2                              | 1.8432 | 0.005  |
| 221734_at   | PRRC1    | proline-rich coiled-coil 1                             | 1.3737 | 0.0008 |
| 221736_at   | KIAA1219 | KIAA1219                                               | 0.5411 | 0.0094 |
| 221738_at   | KIAA1219 | KIAA1219                                               | 1.1061 | 0      |
| 221741_s_at | YTHDF1   | YTH domain family; member 1                            | 0.5946 | 0.0001 |
| 221744_at   | WDR68    | WD repeat domain 68                                    | 1.0066 | 0      |
| 221745_at   | WDR68    | WD repeat domain 68                                    | 1.5511 | 0.0001 |
| 221753_at   | SSH1     | slingshot homolog 1 (Drosophila)                       | 0.5086 | 0.0236 |
| 221762_s_at | C20orf67 | chromosome 20 open reading frame 67                    | 1.1733 | 0.0059 |
| 221764_at   | C19orf22 | chromosome 19 open reading frame 22                    | 0.5764 | 0.0129 |
| 221783_at   | WIZ      | widely interspaced zinc finger motifs                  | 0.5335 | 0.0046 |
| 221785_at   | WIZ      | widely interspaced zinc finger motifs                  | 0.3241 | 0.0128 |
| 221789_x_at | RHOT2    | ras homolog gene family; member T2                     | 0.4461 | 0.0191 |
| 221799_at   | CSG1cA-T | chondroitin sulfate glucuronyltransferase              | 0.4337 | 0.0375 |
| 221801_x_at | NEFL     | neurofilament; light polypeptide 68kDa                 | 1.2668 | 0.0164 |
| 221805_at   | NEFL     | neurofilament; light polypeptide 68kDa                 | 3.7288 | 0.0003 |
| 221812_at   | FBXO42   | F-box protein 42                                       | 0.4786 | 0.0375 |
| 221819_at   | RAB35    | RAB35; member RAS oncogene family                      | 0.4546 | 0.0017 |
| 221821_s_at | C12orf41 | chromosome 12 open reading frame 41                    | 0.613  | 0.0016 |
| 221823_at   | C5orf30  | chromosome 5 open reading frame 30                     | 1.9598 | 0      |
| 221829_s_at | TNPO1    | transportin 1                                          | 0.6783 | 0      |



|             |           |                                                                                                                                                                                                                                                      |        |        |
|-------------|-----------|------------------------------------------------------------------------------------------------------------------------------------------------------------------------------------------------------------------------------------------------------|--------|--------|
| 221842_s_at | ZNF131    | zinc finger protein 131                                                                                                                                                                                                                              | 0.3413 | 0.0236 |
| 221843_s_at | KIAA1609  | KIAA1609                                                                                                                                                                                                                                             | 1.3175 | 0      |
| 221849_s_at | LOC90379  | hypothetical protein BC002926                                                                                                                                                                                                                        | 1.1457 | 0      |
| 221850_x_at | CTGLF1    | KIAA1975 protein similar to MRIP2, centaurin; gamma-like family; member 1, centaurin; gamma-like family; member 3, centaurin; gamma-like family; member 4, centaurin; gamma-like family; member 5, centaurin; gamma-like family; member 9 pseudogene | 0.7666 | 0.0009 |
| 221851_at   | LOC90379  | hypothetical protein BC002926                                                                                                                                                                                                                        | 0.6679 | 0.0012 |
| 221853_s_at | NOMO1     | NODAL modulator 1, NODAL modulator 2, NODAL modulator 3                                                                                                                                                                                              | 0.8732 | 0      |
| 221855_at   | LOC644096 | hypothetical protein LOC644096                                                                                                                                                                                                                       | 0.5088 | 0.0083 |
| 221860_at   | HNRNPL    | heterogeneous nuclear ribonucleoprotein L                                                                                                                                                                                                            | 0.7361 | 0.0226 |
| 221864_at   | ORAI3     | ORAI calcium release-activated calcium modulator 3                                                                                                                                                                                                   | 1.2658 | 0.0107 |
| 221865_at   | C9orf91   | chromosome 9 open reading frame 91                                                                                                                                                                                                                   | 1.0551 | 0.0103 |
| 221869_at   | ZNF512B   | zinc finger protein 512B                                                                                                                                                                                                                             | 0.4046 | 0.0003 |
| 221873_at   | ZNF143    | zinc finger protein 143                                                                                                                                                                                                                              | 0.2996 | 0.0242 |
| 221876_at   | ZNF783    | zinc finger protein 783                                                                                                                                                                                                                              | 0.4307 | 0.0402 |
| 221882_s_at | TMEM8     | transmembrane protein 8 (five membrane-spanning domains)                                                                                                                                                                                             | 1.3871 | 0      |
| 221884_at   | EVI1      | ecotropic viral integration site 1                                                                                                                                                                                                                   | 1.0443 | 0.0003 |
| 221888_at   | CC2D1A    | coiled-coil and C2 domain containing 1A                                                                                                                                                                                                              | 0.2691 | 0.032  |
| 221889_at   | KCTD13    | potassium channel tetramerisation domain containing 13                                                                                                                                                                                               | 0.6684 | 0.0035 |
| 221893_s_at | ADCK2     | aarF domain containing kinase 2                                                                                                                                                                                                                      | 1.0592 | 0.0021 |
| 221895_at   | MOSPD2    | motile sperm domain containing 2                                                                                                                                                                                                                     | 0.8789 | 0.0002 |
| 221897_at   | TRIM52    | tripartite motif-containing 52                                                                                                                                                                                                                       | 1.1616 | 0.0001 |
| 221909_at   | TMEM118   | transmembrane protein 118                                                                                                                                                                                                                            | 1.9249 | 0      |
| 221916_at   | NEFL      | neurofilament; light polypeptide 68kDa                                                                                                                                                                                                               | 3.0366 | 0.0023 |
| 221919_at   | HNRNPA1   | heterogeneous nuclear ribonucleoprotein A1, hypothetical protein LOC728844                                                                                                                                                                           | 0.8601 | 0.0033 |
| 221922_at   | GPSM2     | G-protein signaling modulator 2 (AGS3-like; C. elegans)                                                                                                                                                                                              | 1.1387 | 0.0101 |
| 221923_s_at | NPM1      | nucleophosmin (nucleolar phosphoprotein B23; numatrin)                                                                                                                                                                                               | 0.6157 | 0.004  |
| 221925_s_at | CSPP1     | centrosome and spindle pole associated protein 1                                                                                                                                                                                                     | 0.5056 | 0.0115 |
| 221938_x_at | MED16     | mediator complex subunit 16                                                                                                                                                                                                                          | 0.3552 | 0.0164 |
| 221939_at   | YIPF2     | Yip1 domain family; member 2                                                                                                                                                                                                                         | 0.717  | 0.0123 |
| 221940_at   | RPUSD2    | RNA pseudouridylate synthase domain containing 2                                                                                                                                                                                                     | 0.2861 | 0.0291 |
| 221954_at   | C20orf111 | Chromosome 20 open reading frame 111                                                                                                                                                                                                                 | 0.8523 | 0.003  |
| 221957_at   | PDK3      | pyruvate dehydrogenase kinase; isozyme 3                                                                                                                                                                                                             | 1.1414 | 0.0006 |

|             |           |                                                                                                                                                                                                                      |        |        |
|-------------|-----------|----------------------------------------------------------------------------------------------------------------------------------------------------------------------------------------------------------------------|--------|--------|
| 221962_s_at | UBE2H     | ubiquitin-conjugating enzyme E2H (UBC8 homolog; yeast)                                                                                                                                                               | 0.8111 | 0.0462 |
| 221965_at   | MPHOSPH9  | M-phase phosphoprotein 9                                                                                                                                                                                             | 1.4154 | 0.0007 |
| 221971_x_at | CTGLF1    | centaurin; gamma-like family; member 1, centaurin; gamma-like family; member 2, centaurin; gamma-like family; member 6, centaurin; gamma-like family; member 7, centaurin; gamma-like family; member 9 pseudogene    | 0.9179 | 0.0004 |
| 221973_at   |           | CDNA clone IMAGE:5217021; with apparent retained intron                                                                                                                                                              | 1.6002 | 0      |
| 221986_s_at | KLHL24    | kelch-like 24 (Drosophila)                                                                                                                                                                                           | 0.9752 | 0.0205 |
| 221988_at   | CRSP7     | Cofactor required for Sp1 transcriptional activation; subunit 7; 70kDa                                                                                                                                               | 1.118  | 0.0004 |
| 221999_at   | VRK3      | vaccinia related kinase 3                                                                                                                                                                                            | 0.7373 | 0.0019 |
| 222018_at   | NACA      | NACA family member 3 pseudogene, nascent polypeptide-associated complex alpha subunit, nascent polypeptide-associated complex alpha subunit 2, nascent-polypeptide-associated complex alpha polypeptide pseudogene 1 | 1.5173 | 0.0001 |
| 222019_at   | PFDN6     | prefoldin subunit 6                                                                                                                                                                                                  | 0.245  | 0.0417 |
| 222034_at   | GNB2L1    | Guanine nucleotide binding protein (G protein); beta polypeptide 2-like 1                                                                                                                                            | 1.0216 | 0.0065 |
| 222036_s_at | MCM4      | minichromosome maintenance complex component 4                                                                                                                                                                       | 1.4103 | 0      |
| 222037_at   | MCM4      | minichromosome maintenance complex component 4                                                                                                                                                                       | 1.1531 | 0.0011 |
| 222039_at   | LOC146909 | hypothetical protein LOC146909                                                                                                                                                                                       | 1.5248 | 0.0004 |
| 222052_at   | C19orf54  | chromosome 19 open reading frame 54                                                                                                                                                                                  | 0.5521 | 0.0044 |
| 222058_at   |           |                                                                                                                                                                                                                      | 0.3792 | 0.0093 |
| 222060_at   | KRT8P12   | keratin 8 pseudogene 12                                                                                                                                                                                              | 0.3629 | 0.002  |
| 222074_at   | UROD      | uroporphyrinogen decarboxylase                                                                                                                                                                                       | 0.4647 | 0.0001 |
| 222077_s_at | RACGAP1   | Rac GTPase activating protein 1                                                                                                                                                                                      | 4.0823 | 0      |
| 222088_s_at | SLC2A14   | solute carrier family 2 (facilitated glucose transporter); member 14, solute carrier family 2 (facilitated glucose transporter); member 3                                                                            | 1.1681 | 0.0124 |
| 222094_at   | SULT1A3   | sulfotransferase family; cytosolic; 1A; phenol-preferring; member 3, sulfotransferase family; cytosolic; 1A; phenol-preferring; member 4                                                                             | 0.2851 | 0.03   |
| 222104_x_at | GTF2H3    | general transcription factor IIH; polypeptide 3; 34kDa                                                                                                                                                               | 0.5632 | 0.001  |
| 222105_s_at | NKIRAS2   | NFKB inhibitor interacting Ras-like 2                                                                                                                                                                                | 0.5201 | 0.0025 |
| 222112_at   | EPS15L1   | epidermal growth factor receptor pathway substrate 15-like 1                                                                                                                                                         | 0.1009 | 0.0114 |
| 222113_s_at | EPS15L1   | epidermal growth factor receptor pathway substrate 15-like 1                                                                                                                                                         | 0.6425 | 0.0224 |
| 222122_s_at | THOC2     | THO complex 2                                                                                                                                                                                                        | 0.9874 | 0.0012 |
| 222128_at   | NSUN6     | NOL1/NOP2/Sun domain family; member 6                                                                                                                                                                                | 0.6004 | 0.0382 |

|             |           |                                                                                                |        |        |
|-------------|-----------|------------------------------------------------------------------------------------------------|--------|--------|
| 222130_s_at | FTSJ2     | FtsJ homolog 2 (E. coli)                                                                       | 0.4608 | 0.0151 |
| 222131_x_at | RHOT2     | ras homolog gene family; member T2                                                             | 0.2613 | 0.0184 |
| 222132_s_at | AGK       | acylglycerol kinase                                                                            | 0.4416 | 0.0432 |
| 222133_s_at | PHF20L1   | PHD finger protein 20-like 1                                                                   | 0.7857 | 0.0139 |
| 222139_at   | KIAA1466  | KIAA1466 gene                                                                                  | 0.6532 | 0.0343 |
| 222140_s_at | GPR89A    | G protein-coupled receptor 89A, G protein-coupled receptor 89B, G protein-coupled receptor 89C | 0.4515 | 0.0151 |
| 222141_at   | KLHL22    | kelch-like 22 (Drosophila)                                                                     | 0.1757 | 0.0397 |
| 222147_s_at | ACTR5     | ARP5 actin-related protein 5 homolog (yeast)                                                   | 0.3978 | 0.0123 |
| 222164_at   | FGFR1     | fibroblast growth factor receptor 1 (fms-related tyrosine kinase 2; Pfeiffer syndrome)         | 0.7648 | 0.0178 |
| 222167_at   |           | CDNA FLJ11774 fis; clone HEMBA1005884                                                          | 0.6598 | 0.0137 |
| 222169_x_at | SH2D3A    | SH2 domain containing 3A                                                                       | 0.1385 | 0.0001 |
| 222174_at   |           | CDNA FLJ14025 fis; clone HEMBA1003667                                                          | 0.1408 | 0.0104 |
| 222182_s_at | CNOT2     | CCR4-NOT transcription complex; subunit 2                                                      | 0.5744 | 0.012  |
| 222190_s_at | C16orf58  | chromosome 16 open reading frame 58                                                            | 0.2637 | 0.0287 |
| 222201_s_at | CASP8AP2  | CASP8 associated protein 2                                                                     | 0.7707 | 0.0213 |
| 222206_s_at | NCLN      | nicalin homolog (zebrafish)                                                                    | 0.8424 | 0.0346 |
| 222207_x_at | LOC389517 | Williams Beuren syndrome chromosome region 19 pseudogene                                       | 0.1809 | 0.007  |
| 222208_s_at | POLR2J4   | polymerase (RNA) II (DNA directed) polypeptide J; 13.3kDa pseudogene                           | 0.3113 | 0.0001 |
| 222214_at   |           | CDNA: FLJ21335 fis; clone COL02546                                                             | 1.0201 | 0.0046 |
| 222233_s_at | DCLRE1C   | DNA cross-link repair 1C (PSO2 homolog; S. cerevisiae)                                         | 1.3643 | 0      |
| 222237_s_at | ZNF228    | zinc finger protein 228                                                                        | 1.0236 | 0.0041 |
| 222238_s_at | POLM      | polymerase (DNA directed); mu                                                                  | 0.3146 | 0.0096 |
| 222244_s_at | TUG1      | taurine upregulated gene 1                                                                     | 0.3912 | 0.013  |
| 222248_s_at | SIRT4     | sirtuin (silent mating type information regulation 2 homolog) 4 (S. cerevisiae)                | 0.5252 | 0.0139 |
| 222249_at   |           | KIAA1651 protein                                                                               | 0.1398 | 0.0211 |
| 222250_s_at | INTS7     | integrator complex subunit 7                                                                   | 1.4108 | 0.0004 |
| 222263_at   | SLC35E1   | solute carrier family 35; member E1                                                            | 0.9518 | 0      |
| 222266_at   | C19orf2   | Chromosome 19 open reading frame 2                                                             | 0.6756 | 0.0123 |
| 222272_x_at | SCIN      | scinderin                                                                                      | 0.1619 | 0.004  |
| 222282_at   |           | Transcribed locus                                                                              | 1.219  | 0.0034 |
| 222283_at   | ZNF480    | zinc finger protein 480                                                                        | 0.327  | 0.001  |
| 222307_at   | LOC282997 | hypothetical protein LOC282997                                                                 | 0.5384 | 0.0058 |
| 222313_at   |           | Transcribed locus                                                                              | 1.4747 | 0.0092 |
| 222335_at   |           | Transcribed locus                                                                              | 0.4347 | 0.0014 |
| 222341_x_at |           | Transcribed locus                                                                              | 0.2498 | 0.0001 |

|             |           |                                                                                         |        |        |
|-------------|-----------|-----------------------------------------------------------------------------------------|--------|--------|
| 222344_at   |           | Transcribed locus                                                                       | 1.3086 | 0.0135 |
| 222345_at   |           | Transcribed locus                                                                       | 0.1979 | 0.0378 |
| 222361_at   | LOC643224 | similar to tubulin; beta 8                                                              | 1.1399 | 0.0201 |
| 222368_at   |           | CDNA FLJ37098 fis; clone BRACE2019004                                                   | 0.8821 | 0.0016 |
| 222372_at   |           | Transcribed locus                                                                       | 1.3822 | 0.0013 |
| 222376_at   |           | Transcribed locus                                                                       | 1.2859 | 0.0076 |
| 222379_at   |           | Transcribed locus                                                                       | 1.336  | 0.0442 |
| 222380_s_at | PDCD6     | Programmed cell death 6                                                                 | 1.7712 | 0.0001 |
| 222382_x_at | NUP205    | nucleoporin 205kDa                                                                      | 0.2992 | 0.0163 |
| 222387_s_at | VPS35     | vacuolar protein sorting 35 homolog (S. cerevisiae)                                     | 1.9777 | 0.0004 |
| 222388_s_at | VPS35     | vacuolar protein sorting 35 homolog (S. cerevisiae)                                     | 0.4885 | 0.0044 |
| 222398_s_at | EFTUD2    | elongation factor Tu GTP binding domain containing 2                                    | 0.3827 | 0.0114 |
| 222413_s_at | MLL3      | myeloid/lymphoid or mixed-lineage leukemia 3                                            | 1.7152 | 0      |
| 222414_at   | MLL3      | myeloid/lymphoid or mixed-lineage leukemia 3                                            | 0.7278 | 0      |
| 222415_at   | MLL3      | myeloid/lymphoid or mixed-lineage leukemia 3                                            | 0.5487 | 0.0002 |
| 222416_at   | ALDH18A1  | aldehyde dehydrogenase 18 family; member A1                                             | 0.4103 | 0.0434 |
| 222424_s_at | NUCKS1    | nuclear casein kinase and cyclin-dependent kinase substrate 1                           | 0.5148 | 0.0482 |
| 222427_s_at | LARS      | leucyl-tRNA synthetase                                                                  | 0.4566 | 0.0153 |
| 222451_s_at | ZDHHC9    | zinc finger; DHHC-type containing 9                                                     | 1.1905 | 0.0006 |
| 222460_s_at | NIP30     | NEFA-interacting nuclear protein NIP30                                                  | 0.9364 | 0      |
| 222463_s_at | BACE1     | beta-site APP-cleaving enzyme 1                                                         | 0.8493 | 0.0208 |
| 222466_s_at | MRPL42    | mitochondrial ribosomal protein L42                                                     | 0.5282 | 0.0357 |
| 222473_s_at | ERBB2IP   | erbB2 interacting protein                                                               | 0.9803 | 0      |
| 222499_at   | MRPS16    | mitochondrial ribosomal protein S16                                                     | 0.4166 | 0.0114 |
| 222501_s_at | REPIN1    | replication initiator 1                                                                 | 0.5372 | 0.0196 |
| 222503_s_at | WDR41     | WD repeat domain 41                                                                     | 1.2013 | 0      |
| 222505_at   | LMBR1     | limb region 1 homolog (mouse)                                                           | 0.5591 | 0.0221 |
| 222510_s_at | MKRN2     | makorin; ring finger protein; 2                                                         | 0.8645 | 0.0029 |
| 222527_s_at | RBM22     | RNA binding motif protein 22                                                            | 1.2374 | 0.0003 |
| 222530_s_at | MKKS      | McKusick-Kaufman syndrome                                                               | 0.8126 | 0.0018 |
| 222538_s_at | APPL1     | adaptor protein; phosphotyrosine interaction; PH domain and leucine zipper containing 1 | 0.9228 | 0.0269 |
| 222544_s_at | WHSC1L1   | Wolf-Hirschhorn syndrome candidate 1-like 1                                             | 1.1665 | 0.0001 |
| 222548_s_at | MAP4K4    | mitogen-activated protein kinase kinase kinase kinase 4                                 | 0.4241 | 0.0446 |
| 222550_at   | ARMC1     | armadillo repeat containing 1                                                           | 0.3477 | 0.0168 |
| 222593_s_at | SPATS2    | spermatogenesis associated; serine-rich 2                                               | 2.0055 | 0      |
| 222594_s_at | SPATS2    | spermatogenesis associated; serine-rich 2                                               | 1.4631 | 0      |

|             |           |                                                                                   |        |        |
|-------------|-----------|-----------------------------------------------------------------------------------|--------|--------|
| 222600_s_at | UBE1L2    | ubiquitin-activating enzyme E1-like 2                                             | 1.3425 | 0      |
| 222601_at   | UBE1L2    | ubiquitin-activating enzyme E1-like 2                                             | 0.8272 | 0.0003 |
| 222605_at   | RCOR3     | REST corepressor 3                                                                | 0.8253 | 0.0012 |
| 222606_at   | ZWILCH    | Zwilch; kinetochore associated; homolog (Drosophila)                              | 2.5038 | 0      |
| 222608_s_at | ANLN      | anillin; actin binding protein                                                    | 5.0946 | 0      |
| 222613_at   | C12orf4   | chromosome 12 open reading frame 4                                                | 1.386  | 0.0001 |
| 222615_s_at | PRKRIP1   | PRKR interacting protein 1 (IL11 inducible)                                       | 0.6698 | 0.0176 |
| 222620_s_at | DNAJC1    | DnaJ (Hsp40) homolog; subfamily C; member 1                                       | 0.5238 | 0.0038 |
| 222621_at   | DNAJC1    | DnaJ (Hsp40) homolog; subfamily C; member 1                                       | 0.7299 | 0.0011 |
| 222622_at   | LOC283871 | hypothetical protein LOC283871                                                    | 0.922  | 0.0035 |
| 222628_s_at | REV1      | REV1 homolog (S. cerevisiae)                                                      | 0.8349 | 0.0082 |
| 222635_s_at | MED28     | mediator complex subunit 28                                                       | 0.4678 | 0.0109 |
| 222636_at   | MED28     | mediator complex subunit 28                                                       | 0.6225 | 0.0174 |
| 222640_at   | DNMT3A    | DNA (cytosine-5-)-methyltransferase 3 alpha                                       | 0.7878 | 0.0224 |
| 222641_s_at | C17orf63  | chromosome 17 open reading frame 63                                               | 1.0148 | 0.0005 |
| 222644_s_at | GLT25D1   | glycosyltransferase 25 domain containing 1                                        | 0.5924 | 0.0042 |
| 222645_s_at | KCTD5     | potassium channel tetramerisation domain containing 5                             | 0.536  | 0.0086 |
| 222646_s_at | ERO1L     | ERO1-like (S. cerevisiae)                                                         | 1.4779 | 0.0009 |
| 222650_s_at | SLC2A4RG  | SLC2A4 regulator                                                                  | 0.6937 | 0.0056 |
| 222652_s_at | N-PAC     | cytokine-like nuclear factor n-pac                                                | 0.5402 | 0.0441 |
| 222656_at   | UBE2W     | ubiquitin-conjugating enzyme E2W (putative)                                       | 0.4124 | 0.0473 |
| 222661_at   | AGGF1     | angiogenic factor with G patch and FHA domains 1                                  | 0.5123 | 0.026  |
| 222662_at   | LOC286044 | hypothetical protein LOC286044                                                    | 1.771  | 0.0032 |
| 222663_at   | RIOK2     | RIO kinase 2 (yeast)                                                              | 1.2722 | 0.0016 |
| 222673_x_at | FAM122B   | family with sequence similarity 122B, transmembrane protein 57                    | 0.5672 | 0.0032 |
| 222680_s_at | DTL       | denticleless homolog (Drosophila)                                                 | 2.6089 | 0.0002 |
| 222685_at   | FAM29A    | family with sequence similarity 29; member A                                      | 1.243  | 0.0003 |
| 222686_s_at | FLJ11151  | hypothetical protein FLJ11151                                                     | 1.3274 | 0.0029 |
| 222697_s_at | ABHD10    | abhydrolase domain containing 10                                                  | 0.8117 | 0.0423 |
| 222699_s_at | PLEKHF2   | pleckstrin homology domain containing; family F (with FYVE domain) member 2       | 0.8795 | 0.0384 |
| 222705_s_at | SLC25A15  | solute carrier family 25 (mitochondrial carrier; ornithine transporter) member 15 | 0.2688 | 0.0428 |
| 222716_s_at | SNX24     | sorting nexin 24                                                                  | 0.5884 | 0.0016 |
| 222718_at   | TMEM8     | transmembrane protein 8 (five membrane-spanning domains)                          | 0.7494 | 0.0002 |
| 222726_s_at | EXOC5     | exocyst complex component 5                                                       | 0.6622 | 0.0103 |

|             |          |                                                                |        |        |
|-------------|----------|----------------------------------------------------------------|--------|--------|
| 222729_at   | FBXW7    | F-box and WD repeat domain containing 7                        | 0.7398 | 0.0403 |
| 222735_at   | TMEM38B  | transmembrane protein 38B                                      | 0.5577 | 0.0101 |
| 222736_s_at | TMEM38B  | transmembrane protein 38B                                      | 1.1943 | 0.0118 |
| 222740_at   | ATAD2    | ATPase family; AAA domain containing 2                         | 1.5597 | 0.0002 |
| 222747_s_at | SCML1    | sex comb on midleg-like 1 (Drosophila)                         | 1.204  | 0.0034 |
| 222748_s_at | TXNL4B   | thioredoxin-like 4B                                            | 0.9309 | 0.0113 |
| 222752_s_at | C1orf75  | chromosome 1 open reading frame 75                             | 0.8945 | 0.0433 |
| 222758_s_at | TMEM132A | transmembrane protein 132A                                     | 0.3658 | 0.0021 |
| 222760_at   | ZNF703   | zinc finger protein 703                                        | 1.0998 | 0.0053 |
| 222767_s_at | C12orf49 | chromosome 12 open reading frame 49                            | 0.8382 | 0.0042 |
| 222768_s_at | TRMT6    | tRNA methyltransferase 6 homolog (S. cerevisiae)               | 0.5251 | 0.0168 |
| 222774_s_at | NETO2    | neuropilin (NRP) and tolloid (TLL)-like 2                      | 2.987  | 0      |
| 222777_s_at | WHSC1    | Wolf-Hirschhorn syndrome candidate 1                           | 0.8132 | 0.0169 |
| 222781_s_at | C9orf40  | chromosome 9 open reading frame 40                             | 1.5258 | 0.0003 |
| 222786_at   | CHST12   | carbohydrate (chondroitin 4) sulfotransferase 12               | 0.5367 | 0.0041 |
| 222792_s_at | CCDC59   | coiled-coil domain containing 59                               | 0.4345 | 0.03   |
| 222799_at   | WDR91    | WD repeat domain 91                                            | 0.3759 | 0.0093 |
| 222802_at   | EDN1     | endothelin 1                                                   | 0.9241 | 0.0461 |
| 222810_s_at | RASAL2   | RAS protein activator like 2                                   | 0.6825 | 0.0148 |
| 222812_s_at | RHOF     | ras homolog gene family; member F (in filopodia)               | 0.6654 | 0.0081 |
| 222821_s_at | GEMIN7   | gem (nuclear organelle) associated protein 7                   | 1.1581 | 0.0002 |
| 222841_s_at | TIMM22   | translocase of inner mitochondrial membrane 22 homolog (yeast) | 0.5691 | 0.0366 |
| 222843_at   | FIGNL1   | fidgetin-like 1                                                | 1.5503 | 0      |
| 222848_at   | CENPK    | centromere protein K                                           | 3.4383 | 0      |
| 222850_s_at | DNAJB14  | DnaJ (Hsp40) homolog; subfamily B; member 14                   | 1.032  | 0.0002 |
| 222852_at   | C10orf88 | chromosome 10 open reading frame 88                            | 0.3312 | 0.0272 |
| 222873_s_at | EHMT1    | euchromatic histone-lysine N-methyltransferase 1               | 0.6369 | 0.008  |
| 222878_s_at | OTUB2    | OTU domain; ubiquitin aldehyde binding 2                       | 0.2153 | 0.0495 |
| 222879_s_at | POLH     | polymerase (DNA directed); eta                                 | 0.3835 | 0.003  |
| 222884_at   | ZNF346   | zinc finger protein 346                                        | 0.6329 | 0.0014 |
| 222889_at   | DCLRE1B  | DNA cross-link repair 1B (PSO2 homolog; S. cerevisiae)         | 0.8996 | 0.0016 |
| 222890_at   | CCDC113  | coiled-coil domain containing 113                              | 0.7624 | 0.0323 |
| 222891_s_at | BCL11A   | B-cell CLL/lymphoma 11A (zinc finger protein)                  | 1.2845 | 0.0468 |
| 222894_x_at | C20orf7  | chromosome 20 open reading frame 7                             | 0.5584 | 0.0342 |
| 222906_at   | FLVCR1   | feline leukemia virus subgroup C cellular receptor 1           | 1.4272 | 0.0136 |

|             |          |                                                                                                                                           |        |        |
|-------------|----------|-------------------------------------------------------------------------------------------------------------------------------------------|--------|--------|
| 222909_s_at | BAG4     | BCL2-associated athanogene 4                                                                                                              | 0.4763 | 0.0395 |
| 222918_at   | RAB9B    | RAB9B; member RAS oncogene family                                                                                                         | 1.4637 | 0.0215 |
| 222929_at   | RAI16    | retinoic acid induced 16                                                                                                                  | 0.1071 | 0.0267 |
| 222947_at   | ZNF224   | Zinc finger protein 224                                                                                                                   | 0.6189 | 0.0218 |
| 222951_s_at | ANKRD5   | ankyrin repeat domain 5                                                                                                                   | 0.188  | 0.0361 |
| 222958_s_at | DEPDC1   | DEP domain containing 1                                                                                                                   | 2.2225 | 0.001  |
| 222962_s_at | MCM10    | minichromosome maintenance complex component 10                                                                                           | 0.7197 | 0.0226 |
| 222985_at   | YWHAG    | tyrosine 3-monooxygenase/tryptophan 5-monooxygenase activation protein; gamma polypeptide                                                 | 0.2172 | 0.0269 |
| 223016_x_at | ZRANB2   | zinc finger; RAN-binding domain containing 2                                                                                              | 0.5037 | 0.0139 |
| 223020_at   | CLPTM1L  | CLPTM1-like                                                                                                                               | 0.4451 | 0.0469 |
| 223024_at   | AP1M1    | adaptor-related protein complex 1; mu 1 subunit                                                                                           | 0.4361 | 0.0182 |
| 223031_s_at | TRAF7    | TNF receptor-associated factor 7                                                                                                          | 0.5747 | 0.001  |
| 223038_s_at | FAM60A   | family with sequence similarity 60; member A, similar to Protein FAM60A (Tera protein), similar to teratocarcinoma expressed; serine rich | 1.3386 | 0.0059 |
| 223065_s_at | STARD3NL | STARD3 N-terminal like                                                                                                                    | 0.4748 | 0.0048 |
| 223075_s_at | C9orf58  | chromosome 9 open reading frame 58                                                                                                        | 2.4941 | 0.0046 |
| 223078_s_at | TMOD3    | tropomodulin 3 (ubiquitous)                                                                                                               | 0.6605 | 0.0037 |
| 223080_at   | GLS      | Glutaminase                                                                                                                               | 0.5136 | 0.0055 |
| 223082_at   | SH3KBP1  | SH3-domain kinase binding protein 1                                                                                                       | 0.6447 | 0.0355 |
| 223086_x_at | MRPL51   | mitochondrial ribosomal protein L51                                                                                                       | 0.213  | 0.0364 |
| 223098_s_at | LONP2    | lon peptidase 2; peroxisomal                                                                                                              | 0.6312 | 0.0136 |
| 223099_s_at | LONP2    | lon peptidase 2; peroxisomal                                                                                                              | 0.5141 | 0.0137 |
| 223110_at   | KIAA1429 | KIAA1429                                                                                                                                  | 0.961  | 0.0001 |
| 223111_x_at | ARID4B   | AT rich interactive domain 4B (RBP1-like)                                                                                                 | 0.535  | 0.0083 |
| 223116_at   | BCAR1    | breast cancer anti-estrogen resistance 1                                                                                                  | 0.3877 | 0.0185 |
| 223158_s_at | NEK6     | NIMA (never in mitosis gene a)-related kinase 6                                                                                           | 1.636  | 0.0182 |
| 223159_s_at | NEK6     | NIMA (never in mitosis gene a)-related kinase 6                                                                                           | 1.4409 | 0.0312 |
| 223163_s_at | ZC3HC1   | zinc finger; C3HC-type containing 1                                                                                                       | 0.7065 | 0.0078 |
| 223172_s_at | MTP18    | mitochondrial protein 18 kDa                                                                                                              | 1.2071 | 0.0197 |
| 223173_at   | SPNS1    | spinster homolog 1 (Drosophila)                                                                                                           | 0.6662 | 0.0001 |
| 223186_at   | TMEM189  | transmembrane protein 189                                                                                                                 | 0.5383 | 0.0009 |
| 223188_at   | C19orf61 | chromosome 19 open reading frame 61                                                                                                       | 0.3186 | 0.003  |
| 223189_x_at | MLL5     | myeloid/lymphoid or mixed-lineage leukemia 5 (trithorax homolog; Drosophila)                                                              | 0.6494 | 0.0312 |
| 223195_s_at | SESN2    | sestrin 2                                                                                                                                 | 1.6589 | 0.0001 |

|             |          |                                                                                                                 |        |        |
|-------------|----------|-----------------------------------------------------------------------------------------------------------------|--------|--------|
| 223196_s_at | SESN2    | sestrin 2                                                                                                       | 0.7944 | 0.0007 |
| 223197_s_at | SMARCAD1 | SWI/SNF-related; matrix-associated actin-dependent regulator of chromatin; subfamily a; containing DEAD/H box 1 | 0.5619 | 0.0101 |
| 223199_at   | MKNK2    | MAP kinase interacting serine/threonine kinase 2                                                                | 0.6879 | 0.0118 |
| 223200_s_at | LSG1     | large subunit GTPase 1 homolog (S. cerevisiae)                                                                  | 0.7153 | 0.0144 |
| 223203_at   | TMEM29   | transmembrane protein 29, transmembrane protein 29B                                                             | 1.1203 | 0.0001 |
| 223212_at   | ZDHHC16  | zinc finger; DHHC-type containing 16                                                                            | 0.9854 | 0.0015 |
| 223216_x_at | FBXO16   | F-box protein 16, zinc finger protein 395                                                                       | 1.3712 | 0.0027 |
| 223219_s_at | CNOT10   | CCR4-NOT transcription complex; subunit 10                                                                      | 0.6302 | 0.0313 |
| 223229_at   | UBE2T    | ubiquitin-conjugating enzyme E2T (putative)                                                                     | 3.4965 | 0      |
| 223234_at   | MAD2L2   | MAD2 mitotic arrest deficient-like 2 (yeast)                                                                    | 0.7654 | 0.0339 |
| 223244_s_at | NDUFA12  | NADH dehydrogenase (ubiquinone) 1 alpha subcomplex; 12                                                          | 0.4505 | 0      |
| 223246_s_at | STRBP    | spermatid perinuclear RNA binding protein                                                                       | 0.7235 | 0.0248 |
| 223247_at   | MED10    | mediator complex subunit 10                                                                                     | 1.3118 | 0.0002 |
| 223248_at   | HSDL1    | hydroxysteroid dehydrogenase like 1                                                                             | 1.3342 | 0.0007 |
| 223249_at   | CLDN12   | claudin 12                                                                                                      | 0.5641 | 0.0025 |
| 223252_at   | HDGF2    | hepatoma-derived growth factor-related protein 2                                                                | 0.4146 | 0.0008 |
| 223254_s_at | KIAA1333 | KIAA1333                                                                                                        | 1.2748 | 0.0013 |
| 223255_at   | KIAA1333 | KIAA1333                                                                                                        | 0.8569 | 0.0004 |
| 223256_at   | KIAA1333 | KIAA1333                                                                                                        | 1.1218 | 0.0005 |
| 223257_at   | KIAA1333 | KIAA1333                                                                                                        | 0.9523 | 0      |
| 223258_s_at | KIAA1333 | KIAA1333                                                                                                        | 1.2968 | 0.0007 |
| 223260_s_at | POLK     | polymerase (DNA directed) kappa                                                                                 | 1.2532 | 0.0005 |
| 223261_at   | POLK     | polymerase (DNA directed) kappa                                                                                 | 0.3023 | 0.0468 |
| 223271_s_at | CTDSPL2  | CTD (carboxy-terminal domain; RNA polymerase II; polypeptide A) small phosphatase like 2                        | 1.2475 | 0.0043 |
| 223274_at   | TCF19    | transcription factor 19 (SC1)                                                                                   | 1.1166 | 0.0029 |
| 223284_at   | NAT14    | N-acetyltransferase 14                                                                                          | 1.743  | 0.0003 |
| 223287_s_at | FOXP1    | forkhead box P1                                                                                                 | 1.0323 | 0.014  |
| 223289_s_at | USP38    | ubiquitin specific peptidase 38                                                                                 | 0.8249 | 0.0044 |
| 223304_at   | SLC37A3  | solute carrier family 37 (glycerol-3-phosphate transporter); member 3                                           | 1.015  | 0      |
| 223307_at   | CDCA3    | cell division cycle associated 3                                                                                | 2.2494 | 0.0002 |
| 223308_s_at | WDR5     | WD repeat domain 5                                                                                              | 1.0174 | 0.0008 |
| 223323_x_at | TRPM7    | transient receptor potential cation channel; subfamily M; member 7                                              | 0.2096 | 0.0393 |
| 223326_s_at | FLJ22795 | hypothetical protein FLJ22795, similar to cis-Golgi matrix protein GM130                                        | 0.5048 | 0.0374 |



|             |          |                                                                                                                                                                                                                                                                                                                                                                                       |        |        |
|-------------|----------|---------------------------------------------------------------------------------------------------------------------------------------------------------------------------------------------------------------------------------------------------------------------------------------------------------------------------------------------------------------------------------------|--------|--------|
| 223332_x_at | RNF126   | ring finger protein 126                                                                                                                                                                                                                                                                                                                                                               | 0.3924 | 0.0262 |
| 223339_at   | ATPIF1   | ATPase inhibitory factor 1                                                                                                                                                                                                                                                                                                                                                            | 1.2801 | 0.0007 |
| 223348_x_at | MUM1     | melanoma associated antigen (mutated) 1                                                                                                                                                                                                                                                                                                                                               | 0.5487 | 0.0122 |
| 223358_s_at |          | CDNA FLJ33024 fis; clone THYMU1000532; moderately similar to HIGH-AFFINITY CAMP-SPECIFIC 3';5'-CYCLIC PHOSPHODIESTERASE (EC 3.1.4.17)                                                                                                                                                                                                                                                 | 0.7265 | 0.0179 |
| 223361_at   | C6orf115 | chromosome 6 open reading frame 115                                                                                                                                                                                                                                                                                                                                                   | 2.0586 | 0.0004 |
| 223363_at   | PSMG3    | proteasome (prosome; macropain) assembly chaperone 3                                                                                                                                                                                                                                                                                                                                  | 0.7802 | 0.0001 |
| 223373_s_at | PLA2G12A | phospholipase A2; group XIIA                                                                                                                                                                                                                                                                                                                                                          | 1.1658 | 0.0058 |
| 223374_s_at | B3GALNT1 | beta-1;3-N-acetylgalactosaminyltransferase 1 (globoside blood group)                                                                                                                                                                                                                                                                                                                  | 1.088  | 0.0065 |
| 223381_at   | NUF2     | NUF2; NDC80 kinetochore complex component; homolog (S. cerevisiae)                                                                                                                                                                                                                                                                                                                    | 2.9798 | 0      |
| 223388_s_at | ZFYVE1   | zinc finger; FYVE domain containing 1                                                                                                                                                                                                                                                                                                                                                 | 0.7401 | 0.0317 |
| 223396_at   | TMEM60   | transmembrane protein 60                                                                                                                                                                                                                                                                                                                                                              | 0.5595 | 0.0018 |
| 223406_x_at | NIP30    | NEFA-interacting nuclear protein NIP30                                                                                                                                                                                                                                                                                                                                                | 0.6791 | 0.0005 |
| 223407_at   | C16orf48 | chromosome 16 open reading frame 48                                                                                                                                                                                                                                                                                                                                                   | 0.8135 | 0.0399 |
| 223413_s_at | LYAR     | Ly1 antibody reactive homolog (mouse)                                                                                                                                                                                                                                                                                                                                                 | 1.0152 | 0.0012 |
| 223414_s_at | LYAR     | Ly1 antibody reactive homolog (mouse)                                                                                                                                                                                                                                                                                                                                                 | 0.2554 | 0.0415 |
| 223417_at   | RAD18    | RAD18 homolog (S. cerevisiae)                                                                                                                                                                                                                                                                                                                                                         | 0.5314 | 0.0038 |
| 223420_at   | DNAJC14  | DnaJ (Hsp40) homolog; subfamily C; member 14                                                                                                                                                                                                                                                                                                                                          | 0.4827 | 0.0114 |
| 223422_s_at | ARHGAP24 | Rho GTPase activating protein 24                                                                                                                                                                                                                                                                                                                                                      | 1.0432 | 0.0093 |
| 223423_at   | GPR160   | G protein-coupled receptor 160                                                                                                                                                                                                                                                                                                                                                        | 1.0516 | 0.0119 |
| 223424_s_at | ZSCAN21  | zinc finger and SCAN domain containing 21                                                                                                                                                                                                                                                                                                                                             | 0.7289 | 0.0244 |
| 223425_at   | RAVER1   | ribonucleoprotein; PTB-binding 1                                                                                                                                                                                                                                                                                                                                                      | 0.7205 | 0.0046 |
| 223435_s_at | PCDHA1   | protocadherin alpha 1, protocadherin alpha 10, protocadherin alpha 11, protocadherin alpha 12, protocadherin alpha 13, protocadherin alpha 2, protocadherin alpha 3, protocadherin alpha 4, protocadherin alpha 5, protocadherin alpha 6, protocadherin alpha 7, protocadherin alpha 8, protocadherin alpha 9, protocadherin alpha subfamily C; 1, protocadherin alpha subfamily C; 2 | 2.1229 | 0.0224 |
| 223440_at   | C16orf70 | chromosome 16 open reading frame 70                                                                                                                                                                                                                                                                                                                                                   | 0.7094 | 0.0008 |
| 223445_at   | DTNBP1   | dystrobrevin binding protein 1                                                                                                                                                                                                                                                                                                                                                        | 0.424  | 0.0276 |
| 223451_s_at | CKLF     | chemokine-like factor                                                                                                                                                                                                                                                                                                                                                                 | 0.5745 | 0.0092 |

|             |           |                                                                                                         |        |        |
|-------------|-----------|---------------------------------------------------------------------------------------------------------|--------|--------|
| 223456_s_at | TCHP      | trichoplein; keratin filament binding                                                                   | 0.1587 | 0.0138 |
| 223458_at   | SEZ6L2    | seizure related 6 homolog (mouse)-like 2                                                                | 0.9353 | 0.0255 |
| 223461_at   | TBC1D7    | TBC1 domain family; member 7                                                                            | 0.5335 | 0.0387 |
| 223463_at   | RAB23     | RAB23; member RAS oncogene family                                                                       | 1.0759 | 0      |
| 223465_at   | COL4A3BP  | collagen; type IV; alpha 3 (Goodpasture antigen) binding protein                                        | 0.9051 | 0.0001 |
| 223466_x_at | COL4A3BP  | collagen; type IV; alpha 3 (Goodpasture antigen) binding protein                                        | 1.0041 | 0      |
| 223470_at   | PIGM      | phosphatidylinositol glycan anchor biosynthesis; class M                                                | 0.5944 | 0.0346 |
| 223472_at   | WHSC1     | Wolf-Hirschhorn syndrome candidate 1                                                                    | 0.4161 | 0.0223 |
| 223476_s_at | C12orf65  | chromosome 12 open reading frame 65                                                                     | 1.0479 | 0      |
| 223477_s_at | C12orf65  | chromosome 12 open reading frame 65                                                                     | 0.962  | 0.0002 |
| 223488_s_at | GNB4      | guanine nucleotide binding protein (G protein); beta polypeptide 4                                      | 0.2818 | 0.04   |
| 223494_at   | MGEA5     | meningioma expressed antigen 5 (hyaluronidase)                                                          | 1.5676 | 0      |
| 223495_at   | CCDC8     | coiled-coil domain containing 8                                                                         | 1.1728 | 0.0404 |
| 223496_s_at | CCDC8     | coiled-coil domain containing 8                                                                         | 0.9473 | 0.0334 |
| 223501_at   | TNFSF13B  | tumor necrosis factor (ligand) superfamily; member 13b                                                  | 1.9138 | 0.0211 |
| 223502_s_at | TNFSF13B  | tumor necrosis factor (ligand) superfamily; member 13b                                                  | 1.7838 | 0.02   |
| 223506_at   | ZC3H8     | zinc finger CCCH-type containing 8                                                                      | 1.2542 | 0      |
| 223513_at   | CENPJ     | centromere protein J                                                                                    | 1.4962 | 0.0013 |
| 223522_at   | C9orf45   | chromosome 9 open reading frame 45                                                                      | 0.163  | 0.0181 |
| 223528_s_at | LOC731602 | methyltransferase 11 domain containing 1, similar to methyltransferase 11 domain containing 1 isoform 2 | 0.4459 | 0.0054 |
| 223531_x_at | GPR89A    | G protein-coupled receptor 89A, G protein-coupled receptor 89B, G protein-coupled receptor 89C          | 0.4465 | 0.0086 |
| 223538_at   | SERF1A    | small EDRK-rich factor 1A (telomeric), small EDRK-rich factor 1B (centromeric)                          | 0.6135 | 0.017  |
| 223539_s_at | SERF1A    | small EDRK-rich factor 1A (telomeric), small EDRK-rich factor 1B (centromeric)                          | 1.1833 | 0.0061 |
| 223542_at   | ANKRD32   | ankyrin repeat domain 32                                                                                | 2.2918 | 0      |
| 223545_at   | FANCD2    | Fanconi anemia; complementation group D2                                                                | 0.3845 | 0.0033 |
| 223547_at   | C14orf100 | chromosome 14 open reading frame 100                                                                    | 0.6934 | 0.0083 |
| 223556_at   | HELLS     | helicase; lymphoid-specific                                                                             | 1.9884 | 0.0004 |
| 223558_at   | C9orf80   | chromosome 9 open reading frame 80                                                                      | 0.4354 | 0.0184 |
| 223567_at   | SEMA6B    | sema domain; transmembrane domain (TM); and cytoplasmic domain; (semaphorin) 6B                         | 1.0864 | 0.0181 |

|             |               |                                                                      |        |        |
|-------------|---------------|----------------------------------------------------------------------|--------|--------|
| 223570_at   | MCM10         | minichromosome maintenance complex component 10                      | 0.5531 | 0.0008 |
| 223575_at   | KIAA1549      | KIAA1549 protein                                                     | 0.467  | 0.0247 |
| 223584_s_at | KBTBD2        | kelch repeat and BTB (POZ) domain containing 2                       | 1.1663 | 0.0031 |
| 223585_x_at | KBTBD2        | kelch repeat and BTB (POZ) domain containing 2                       | 0.8527 | 0.0462 |
| 223588_at   | THAP2         | THAP domain containing; apoptosis associated protein 2               | 0.6006 | 0.0106 |
| 223590_at   | ZNF700        | zinc finger protein 700                                              | 1.3211 | 0.0001 |
| 223596_at   | SLC12A6       | solute carrier family 12 (potassium/chloride transporters); member 6 | 0.2784 | 0.039  |
| 223602_at   | USP30         | ubiquitin specific peptidase 30                                      | 0.7517 | 0.0018 |
| 223614_at   | C8orf57       | chromosome 8 open reading frame 57                                   | 2.3641 | 0.0154 |
| 223621_at   | PNMA3         | paraneoplastic antigen MA3                                           | 0.9195 | 0.0304 |
| 223628_at   | TMEM191A      | transmembrane protein 191A                                           | 0.2264 | 0.0404 |
| 223629_at   | PCDHB5        | protocadherin beta 5                                                 | 1.4262 | 0.0382 |
| 223630_at   | C7orf13       | chromosome 7 open reading frame 13                                   | 0.451  | 0.041  |
| 223642_at   | ZIC2          | Zic family member 2 (odd-paired homolog; Drosophila)                 | 1.1076 | 0.0122 |
| 223643_at   | CRYGS         | Crystallin; gamma S                                                  | 0.2909 | 0.0037 |
| 223662_x_at | DDX59         | DEAD (Asp-Glu-Ala-Asp) box polypeptide 59                            | 0.3165 | 0.0068 |
| 223677_at   | ATG10         | ATG10 autophagy related 10 homolog (S. cerevisiae)                   | 0.7807 | 0.0073 |
| 223680_at   | ZNF607        | zinc finger protein 607                                              | 0.6855 | 0.0086 |
| 223684_s_at | SMUG1         | single-strand-selective monofunctional uracil-DNA glycosylase 1      | 0.4309 | 0.031  |
| 223697_x_at | C9orf64       | chromosome 9 open reading frame 64                                   | 0.5713 | 0.0036 |
| 223700_at   | MND1          | meiotic nuclear divisions 1 homolog (S. cerevisiae)                  | 2.5958 | 0      |
| 223714_at   | ZNF256        | zinc finger protein 256                                              | 0.7039 | 0.0063 |
| 223720_at   | SPINK7        | serine peptidase inhibitor; Kazal type 7 (putative)                  | 0.2226 | 0.0104 |
| 223724_s_at | DKFZP434A0131 | DKFZp434A0131 protein, STAG3-like                                    | 0.3979 | 0.0161 |
| 223728_at   | MGC16385      | hypothetical protein MGC16385                                        | 0.5674 | 0.0135 |
| 223730_at   | GPC6          | glypican 6                                                           | 0.8281 | 0.0395 |
| 223735_at   | ARL6          | ADP-ribosylation factor-like 6                                       | 0.5148 | 0.0231 |
| 223737_x_at | CHST9         | carbohydrate (N-acetylgalactosamine 4-0) sulfotransferase 9          | 0.1776 | 0.0253 |
| 223742_at   | MRPL4         | mitochondrial ribosomal protein L4                                   | 0.4628 | 0.0342 |
| 223758_s_at | GTF2H2        | general transcription factor IIH; polypeptide 2; 44kDa               | 0.7591 | 0.0457 |
| 223763_at   | DTNBP1        | dystrobrevin binding protein 1                                       | 0.2541 | 0.0148 |
| 223774_at   | C1orf79       | chromosome 1 open reading frame 79                                   | 0.6834 | 0.0234 |
| 223781_x_at | ADH4          | alcohol dehydrogenase 4 (class II); pi polypeptide                   | 0.226  | 0.0455 |

|             |           |                                                                                                         |        |        |
|-------------|-----------|---------------------------------------------------------------------------------------------------------|--------|--------|
| 223785_at   | FANCI     | Fanconi anemia; complementation group I                                                                 | 0.6627 | 0.0096 |
| 223789_s_at | GTPBP2    | GTP binding protein 2                                                                                   | 0.3575 | 0.0169 |
| 223798_at   | SLC41A2   | solute carrier family 41; member 2                                                                      | 0.7466 | 0.0255 |
| 223803_s_at | ZCCHC10   | zinc finger; CCHC domain containing 10                                                                  | 0.5413 | 0.0494 |
| 223804_s_at | THUMPD3   | THUMP domain containing 3                                                                               | 0.6019 | 0.0023 |
| 223805_at   | OSBPL6    | oxysterol binding protein-like 6                                                                        | 3.103  | 0      |
| 223815_at   | CCDC45    | Coiled-coil domain containing 45                                                                        | 0.2122 | 0.0234 |
| 223854_at   | PCDHB10   | protocadherin beta 10                                                                                   | 1.2466 | 0.0378 |
| 223875_s_at | EPC1      | enhancer of polycomb homolog 1 (Drosophila)                                                             | 0.2443 | 0.0121 |
| 223880_x_at | C20orf24  | chromosome 20 open reading frame 24                                                                     | 0.3831 | 0.0275 |
| 223888_s_at | LARS      | leucyl-tRNA synthetase                                                                                  | 0.4849 | 0.011  |
| 223917_s_at | SLC39A3   | solute carrier family 39 (zinc transporter); member 3                                                   | 0.9702 | 0.0005 |
| 223931_s_at | CHFR      | checkpoint with forkhead and ring finger domains                                                        | 0.7146 | 0.0033 |
| 223945_x_at | LOC441212 | retinitis pigmentosa 9 pseudogene                                                                       | 0.4962 | 0.0248 |
| 223981_at   | NIN       | ninein (GSK3B interacting protein)                                                                      | 0.1776 | 0.0276 |
| 223984_s_at | NUPL1     | nucleoporin like 1                                                                                      | 0.4394 | 0.0468 |
| 223988_x_at | LOC731602 | methyltransferase 11 domain containing 1, similar to methyltransferase 11 domain containing 1 isoform 2 | 0.4403 | 0.005  |
| 223994_s_at | SLC12A9   | solute carrier family 12 (potassium/chloride transporters); member 9                                    | 0.1635 | 0.0471 |
| 224010_at   | ANAPC11   | APC11 anaphase promoting complex subunit 11 homolog (yeast)                                             | 0.1403 | 0.0029 |
| 224027_at   | CCL28     | chemokine (C-C motif) ligand 28                                                                         | 1.1141 | 0.0255 |
| 224046_s_at | PDE7A     | phosphodiesterase 7A                                                                                    | 0.4161 | 0.0215 |
| 224064_s_at | DHDDS     | dehydrodolichyl diphosphate synthase                                                                    | 0.3665 | 0.0488 |
| 224068_x_at | RBM22     | RNA binding motif protein 22                                                                            | 0.6703 | 0.0003 |
| 224147_at   | C12orf48  | chromosome 12 open reading frame 48                                                                     | 0.211  | 0.0036 |
| 224159_x_at | TRIM4     | tripartite motif-containing 4                                                                           | 0.2942 | 0.0365 |
| 224165_s_at | IQCH      | IQ motif containing H                                                                                   | 0.3317 | 0.0072 |
| 224173_s_at | MRPL30    | mitochondrial ribosomal protein L30                                                                     | 0.9999 | 0.0129 |
| 224176_s_at | AXIN2     | axin 2 (conductin; axil)                                                                                | 0.2104 | 0.049  |
| 224185_at   |           | CDNA FLJ39726 fis; clone SMINT2015306                                                                   | 0.6123 | 0.0251 |
| 224188_s_at | XPNPEP3   | X-prolyl aminopeptidase (aminopeptidase P) 3; putative                                                  | 0.2613 | 0.0076 |
| 224199_at   | DKK2      | dickkopf homolog 2 (Xenopus laevis)                                                                     | 0.1694 | 0.0072 |
| 224200_s_at | RAD18     | RAD18 homolog (S. cerevisiae)                                                                           | 0.7783 | 0.0081 |
| 224210_s_at | PXMP4     | peroxisomal membrane protein 4; 24kDa                                                                   | 0.766  | 0.0247 |

|             |          |                                                                                                                                                                                                                                                                                                                                                                                       |        |        |
|-------------|----------|---------------------------------------------------------------------------------------------------------------------------------------------------------------------------------------------------------------------------------------------------------------------------------------------------------------------------------------------------------------------------------------|--------|--------|
| 224212_s_at | PCDHA1   | protocadherin alpha 1, protocadherin alpha 10, protocadherin alpha 11, protocadherin alpha 12, protocadherin alpha 13, protocadherin alpha 2, protocadherin alpha 3, protocadherin alpha 4, protocadherin alpha 5, protocadherin alpha 6, protocadherin alpha 7, protocadherin alpha 8, protocadherin alpha 9, protocadherin alpha subfamily C; 1, protocadherin alpha subfamily C; 2 | 1.4458 | 0.0292 |
| 224248_x_at | NIP30    | NEFA-interacting nuclear protein NIP30                                                                                                                                                                                                                                                                                                                                                | 0.4369 | 0.0066 |
| 224254_x_at |          |                                                                                                                                                                                                                                                                                                                                                                                       | 0.6959 | 0.0035 |
| 224284_x_at | FKSG49   | FKSG49                                                                                                                                                                                                                                                                                                                                                                                | 0.4017 | 0.0009 |
| 224288_x_at | FKSG49   | FKSG49                                                                                                                                                                                                                                                                                                                                                                                | 0.7225 | 0      |
| 224311_s_at | CAB39    | calcium binding protein 39                                                                                                                                                                                                                                                                                                                                                            | 0.7126 | 0.033  |
| 224314_s_at | EGLN1    | egl nine homolog 1 (C. elegans)                                                                                                                                                                                                                                                                                                                                                       | 0.9538 | 0.045  |
| 224320_s_at | MCM8     | minichromosome maintenance complex component 8                                                                                                                                                                                                                                                                                                                                        | 1.7059 | 0      |
| 224322_at   | ARID4B   | AT rich interactive domain 4B (RBP1-like)                                                                                                                                                                                                                                                                                                                                             | 0.2974 | 0.0114 |
| 224334_s_at | MRPL51   | mitochondrial ribosomal protein L51                                                                                                                                                                                                                                                                                                                                                   | 0.3505 | 0.0209 |
| 224365_s_at | TIGD7    | tigger transposable element derived 7                                                                                                                                                                                                                                                                                                                                                 | 2.3529 | 0      |
| 224369_s_at | FBXO38   | F-box protein 38                                                                                                                                                                                                                                                                                                                                                                      | 0.3934 | 0.0305 |
| 224370_s_at | CAPS2    | calcyphosine 2                                                                                                                                                                                                                                                                                                                                                                        | 1.602  | 0.0027 |
| 224376_s_at | C20orf24 | chromosome 20 open reading frame 24                                                                                                                                                                                                                                                                                                                                                   | 0.4873 | 0.0387 |
| 224394_at   | RNF7     | ring finger protein 7                                                                                                                                                                                                                                                                                                                                                                 | 0.2793 | 0.0029 |
| 224400_s_at | CHST9    | carbohydrate (N-acetylgalactosamine 4-0) sulfotransferase 9                                                                                                                                                                                                                                                                                                                           | 0.1734 | 0.0182 |
| 224416_s_at | MED28    | mediator complex subunit 28                                                                                                                                                                                                                                                                                                                                                           | 0.6144 | 0.0008 |
| 224428_s_at | CDCA7    | cell division cycle associated 7                                                                                                                                                                                                                                                                                                                                                      | 1.4985 | 0.0159 |
| 224452_s_at | MGC12966 | hypothetical protein LOC84792                                                                                                                                                                                                                                                                                                                                                         | 0.7599 | 0      |
| 224455_s_at | ADPGK    | ADP-dependent glucokinase                                                                                                                                                                                                                                                                                                                                                             | 0.8546 | 0.0019 |
| 224460_s_at | L2HGDH   | L-2-hydroxyglutarate dehydrogenase                                                                                                                                                                                                                                                                                                                                                    | 0.5204 | 0.0014 |
| 224468_s_at | C19orf48 | chromosome 19 open reading frame 48                                                                                                                                                                                                                                                                                                                                                   | 2.4779 | 0      |
| 224478_s_at | C7orf50  | chromosome 7 open reading frame 50                                                                                                                                                                                                                                                                                                                                                    | 1.0195 | 0.0063 |
| 224492_s_at | ZNF627   | zinc finger protein 627                                                                                                                                                                                                                                                                                                                                                               | 1.4071 | 0      |
| 224517_at   | POLR2J4  | polymerase (RNA) II (DNA directed) polypeptide J; 13.3kDa pseudogene                                                                                                                                                                                                                                                                                                                  | 1.1236 | 0.0001 |
| 224518_s_at | ZNF559   | zinc finger protein 559                                                                                                                                                                                                                                                                                                                                                               | 0.7933 | 0.0011 |
| 224521_s_at | CCDC77   | coiled-coil domain containing 77                                                                                                                                                                                                                                                                                                                                                      | 0.798  | 0.0193 |
| 224546_at   |          |                                                                                                                                                                                                                                                                                                                                                                                       | 0.205  | 0.0064 |
| 224549_x_at |          |                                                                                                                                                                                                                                                                                                                                                                                       | 0.9935 | 0.0004 |

|             |               |                                                                         |        |        |
|-------------|---------------|-------------------------------------------------------------------------|--------|--------|
| 224568_x_at | MALAT1        | metastasis associated lung adenocarcinoma transcript 1 (non-coding RNA) | 0.8821 | 0.0406 |
| 224587_at   | SUB1          | SUB1 homolog (S. cerevisiae)                                            | 0.5019 | 0.04   |
| 224588_at   | XIST          | X (inactive)-specific transcript                                        | 3.2664 | 0.0367 |
| 224589_at   | XIST          | X (inactive)-specific transcript                                        | 2.3995 | 0.029  |
| 224593_at   | ZNF664        | zinc finger protein 664                                                 | 0.4025 | 0.0267 |
| 224601_at   |               | CDNA clone IMAGE:3831740                                                | 0.5534 | 0.009  |
| 224603_at   |               | CDNA clone IMAGE:3831740                                                | 0.5239 | 0.0049 |
| 224609_at   | SLC44A2       | solute carrier family 44; member 2                                      | 1.411  | 0.0008 |
| 224610_at   | SNHG1         | small nucleolar RNA host gene (non-protein coding) 1                    | 1.1856 | 0.0032 |
| 224614_at   | DYNC1LI2      | dynein; cytoplasmic 1; light intermediate chain 2                       | 0.6209 | 0.0002 |
| 224616_at   | DYNC1LI2      | dynein; cytoplasmic 1; light intermediate chain 2                       | 0.3769 | 0.0002 |
| 224618_at   | ROD1          | ROD1 regulator of differentiation 1 (S. pombe)                          | 0.5507 | 0.0097 |
| 224623_at   | LOC728554     | THO complex 3, similar to THO complex 3                                 | 2.499  | 0      |
| 224638_at   | UNQ1887       | signal peptide peptidase 3                                              | 0.8048 | 0.0076 |
| 224639_at   | UNQ1887       | signal peptide peptidase 3                                              | 0.8227 | 0.0001 |
| 224640_at   | UNQ1887       | signal peptide peptidase 3                                              | 1.0757 | 0      |
| 224643_at   | PRRC1         | proline-rich coiled-coil 1                                              | 0.7834 | 0.0004 |
| 224656_s_at | MTPN          | myotrophin                                                              | 0.4385 | 0      |
| 224662_at   | KIF5B         | kinesin family member 5B                                                | 0.4573 | 0.0046 |
| 224667_x_at | C10orf104     | chromosome 10 open reading frame 104                                    | 0.2815 | 0.0106 |
| 224676_at   | TMED4         | transmembrane emp24 protein transport domain containing 4               | 0.7151 | 0.041  |
| 224678_at   | KIAA1219      | KIAA1219                                                                | 0.6657 | 0.0002 |
| 224682_at   | ANKIB1        | ankyrin repeat and IBR domain containing 1                              | 0.9113 | 0      |
| 224687_at   | ANKIB1        | ankyrin repeat and IBR domain containing 1                              | 0.9131 | 0      |
| 224695_at   | C2orf29       | chromosome 2 open reading frame 29                                      | 0.5216 | 0.0005 |
| 224703_at   | WDR22         | WD repeat domain 22                                                     | 0.5034 | 0.0441 |
| 224709_s_at | CDC42SE2      | CDC42 small effector 2                                                  | 0.7828 | 0.0001 |
| 224712_x_at | C19orf42      | chromosome 19 open reading frame 42                                     | 0.3621 | 0.0396 |
| 224724_at   | SULF2         | sulfatase 2                                                             | 2.5149 | 0      |
| 224726_at   | MIB1          | mindbomb homolog 1 (Drosophila)                                         | 0.6179 | 0.047  |
| 224727_at   | C19orf63      | chromosome 19 open reading frame 63                                     | 0.8727 | 0.002  |
| 224730_at   | WDR68         | WD repeat domain 68                                                     | 1.5154 | 0.0002 |
| 224740_at   | DKFZP686E2158 | hypothetical protein LOC643155                                          | 0.4206 | 0.0021 |
| 224748_at   | WDR68         | WD repeat domain 68                                                     | 0.5778 | 0.0017 |
| 224749_at   | ITFG3         | integrin alpha FG-GAP repeat containing 3                               | 0.4898 | 0.0453 |
| 224753_at   | CDCA5         | cell division cycle associated 5                                        | 2.0313 | 0.0003 |

|             |          |                                                                               |        |        |
|-------------|----------|-------------------------------------------------------------------------------|--------|--------|
| 224759_s_at | C12orf23 | chromosome 12 open reading frame 23                                           | 0.604  | 0.0005 |
| 224765_at   | MSL-1    | male-specific lethal-1 homolog                                                | 0.7539 | 0.0115 |
| 224772_at   | NAV1     | neuron navigator 1                                                            | 1.4028 | 0.0239 |
| 224773_at   | NAV1     | neuron navigator 1                                                            | 0.8428 | 0.0103 |
| 224774_s_at | NAV1     | neuron navigator 1                                                            | 1.0456 | 0.017  |
| 224779_s_at | FAM96A   | family with sequence similarity 96; member A                                  | 0.406  | 0.0094 |
| 224790_at   | DDEF1    | development and differentiation enhancing factor 1                            | 0.7485 | 0.0097 |
| 224796_at   | DDEF1    | development and differentiation enhancing factor 1                            | 0.4982 | 0.0169 |
| 224813_at   | WASL     | Wiskott-Aldrich syndrome-like                                                 | 0.5003 | 0.0001 |
| 224839_s_at | GPT2     | glutamic pyruvate transaminase (alanine aminotransferase) 2                   | 0.9961 | 0.0258 |
| 224842_at   | SMG1     | PI-3-kinase-related kinase SMG-1                                              | 0.527  | 0.0024 |
| 224846_at   | SHKBP1   | SH3KBP1 binding protein 1                                                     | 0.3946 | 0.0167 |
| 224853_at   | SLAIN2   | SLAIN motif family; member 2                                                  | 0.4265 | 0.0326 |
| 224854_s_at | SLAIN2   | SLAIN motif family; member 2                                                  | 0.4419 | 0.0056 |
| 224859_at   | CD276    | CD276 molecule                                                                | 0.5127 | 0.0146 |
| 224873_s_at | MRPS25   | mitochondrial ribosomal protein S25                                           | 0.6025 | 0.0039 |
| 224875_at   | C5orf24  | chromosome 5 open reading frame 24                                            | 0.5486 | 0.0187 |
| 224878_at   | UBFD1    | ubiquitin family domain containing 1                                          | 0.8473 | 0.0001 |
| 224882_at   | ACSS1    | acyl-CoA synthetase short-chain family member 1                               | 1.3335 | 0.0039 |
| 224896_s_at | TTL      | tubulin tyrosine ligase                                                       | 0.8076 | 0.0095 |
| 224902_at   | PDPR     | pyruvate dehydrogenase phosphatase regulatory subunit                         | 0.955  | 0.0038 |
| 224903_at   | CIRH1A   | cirrhosis; autosomal recessive 1A (cirhin)                                    | 0.4296 | 0.039  |
| 224904_at   | PDPR     | pyruvate dehydrogenase phosphatase regulatory subunit                         | 0.7107 | 0.022  |
| 224908_s_at | TTL      | tubulin tyrosine ligase                                                       | 0.8829 | 0.0008 |
| 224913_s_at | TIMM50   | translocase of inner mitochondrial membrane 50 homolog (S. cerevisiae)        | 0.5837 | 0.0027 |
| 224914_s_at | CIP29    | DnaJ (Hsp40) homolog; subfamily C; member 14, cytokine induced protein 29 kDa | 0.2624 | 0.0498 |
| 224922_at   | CSNK2A2  | casein kinase 2; alpha prime polypeptide                                      | 0.6555 | 0.0003 |
| 224935_at   | EIF2S3   | eukaryotic translation initiation factor 2; subunit 3 gamma; 52kDa            | 0.343  | 0.0379 |
| 224944_at   | TMPO     | thymopoietin                                                                  | 1.6297 | 0      |
| 224949_at   | YIPF5    | Yip1 domain family; member 5                                                  | 0.5143 | 0.0363 |
| 224951_at   | LASS5    | LAG1 homolog; ceramide synthase 5                                             | 0.6657 | 0.0026 |
| 224952_at   | TANC2    | tetratricopeptide repeat; ankyrin repeat and coiled-coil containing 2         | 1.4478 | 0.0049 |
| 224953_at   | YIPF5    | Yip1 domain family; member 5                                                  | 0.642  | 0.0236 |
| 224960_at   | SCYL2    | SCY1-like 2 (S. cerevisiae)                                                   | 0.6846 | 0.0002 |
| 224961_at   | SCYL2    | SCY1-like 2 (S. cerevisiae)                                                   | 0.741  | 0.0001 |

|             |           |                                                                                                                                                                                                                                                            |        |        |
|-------------|-----------|------------------------------------------------------------------------------------------------------------------------------------------------------------------------------------------------------------------------------------------------------------|--------|--------|
| 224962_at   | C9orf69   | chromosome 9 open reading frame 69                                                                                                                                                                                                                         | 0.9242 | 0      |
| 224993_at   | LOC729433 | myeloid/lymphoid or mixed-lineage leukemia (trithorax homolog; Drosophila); translocated to; 1, similar to myeloid/lymphoid or mixed-lineage leukemia (trithorax homolog; Drosophila); translocated to; 1                                                  | 0.3368 | 0.0232 |
| 225017_at   | CCDC14    | coiled-coil domain containing 14                                                                                                                                                                                                                           | 1.117  | 0      |
| 225024_at   | C20orf77  | chromosome 20 open reading frame 77                                                                                                                                                                                                                        | 0.5259 | 0.0063 |
| 225031_at   | CHD6      | chromodomain helicase DNA binding protein 6                                                                                                                                                                                                                | 0.7237 | 0.015  |
| 225035_x_at | CXYorf1   | CXYorf1-related protein, chromosomes X and Y open reading frame 1, family with sequence similarity 39; member B, family with sequence similarity 39; member D pseudogene, family with sequence similarity 39; member E, similar to CXYorf1-related protein | 0.4965 | 0.0175 |
| 225038_s_at | SURF6     | surfeit 6                                                                                                                                                                                                                                                  | 1.0677 | 0.0007 |
| 225042_s_at | FAM130A1  | family with sequence similarity 130; member A1                                                                                                                                                                                                             | 0.5299 | 0.0024 |
| 225052_at   | MGC14327  | hypothetical protein MGC14327                                                                                                                                                                                                                              | 0.3138 | 0.0389 |
| 225053_at   | CNOT7     | CCR4-NOT transcription complex; subunit 7                                                                                                                                                                                                                  | 0.2844 | 0.0239 |
| 225067_at   | ULK3      | unc-51-like kinase 3 (C. elegans)                                                                                                                                                                                                                          | 1.2475 | 0.0042 |
| 225068_at   | KLHL12    | kelch-like 12 (Drosophila)                                                                                                                                                                                                                                 | 0.4671 | 0.024  |
| 225075_at   | PDRG1     | p53 and DNA damage regulated 1                                                                                                                                                                                                                             | 1.5177 | 0      |
| 225079_at   | EMP2      | epithelial membrane protein 2                                                                                                                                                                                                                              | 1.2019 | 0.0331 |
| 225081_s_at | CDCA7L    | cell division cycle associated 7-like                                                                                                                                                                                                                      | 1.6065 | 0.0005 |
| 225084_at   | EXOC5     | exocyst complex component 5                                                                                                                                                                                                                                | 0.3746 | 0.0078 |
| 225087_at   | C16orf63  | chromosome 16 open reading frame 63                                                                                                                                                                                                                        | 0.3707 | 0.004  |
| 225088_at   | C16orf63  | chromosome 16 open reading frame 63                                                                                                                                                                                                                        | 1.2329 | 0.0026 |
| 225091_at   | ZCCHC3    | zinc finger; CCHC domain containing 3                                                                                                                                                                                                                      | 0.8681 | 0.0018 |
| 225094_at   | SETD8     | SET domain containing (lysine methyltransferase) 8                                                                                                                                                                                                         | 0.8655 | 0.0012 |
| 225099_at   | FBXO45    | F-box protein 45                                                                                                                                                                                                                                           | 0.9853 | 0.0006 |
| 225100_at   | FBXO45    | F-box protein 45                                                                                                                                                                                                                                           | 0.7239 | 0.0006 |
| 225104_at   | ZNF598    | zinc finger protein 598                                                                                                                                                                                                                                    | 0.6403 | 0.0023 |
| 225105_at   | OCC-1     | overexpressed in colon carcinoma-1                                                                                                                                                                                                                         | 1.9417 | 0.0088 |
| 225111_s_at | NAPB      | N-ethylmaleimide-sensitive factor attachment protein; beta                                                                                                                                                                                                 | 0.7325 | 0.0479 |
| 225119_at   | CHMP4B    | chromatin modifying protein 4B                                                                                                                                                                                                                             | 0.886  | 0.0391 |
| 225120_at   | PURB      | purine-rich element binding protein B                                                                                                                                                                                                                      | 0.4038 | 0.0143 |
| 225126_at   | MRRF      | mitochondrial ribosome recycling factor                                                                                                                                                                                                                    | 0.6232 | 0.0231 |
| 225134_at   | SPRYD3    | SPRY domain containing 3                                                                                                                                                                                                                                   | 0.3849 | 0.0402 |



|             |           |                                                             |        |        |
|-------------|-----------|-------------------------------------------------------------|--------|--------|
| 225135_at   | SIN3A     | SIN3 homolog A; transcription regulator (yeast)             | 0.9194 | 0.0031 |
| 225137_at   | RBM35B    | RNA binding motif protein 35B                               | 0.467  | 0.0385 |
| 225139_at   | RBM35B    | RNA binding motif protein 35B                               | 0.6157 | 0.0244 |
| 225141_at   | RBM35B    | RNA binding motif protein 35B                               | 0.3822 | 0.0343 |
| 225145_at   | NCOA5     | nuclear receptor coactivator 5                              | 0.4851 | 0.0493 |
| 225146_at   | C9orf25   | chromosome 9 open reading frame 25                          | 0.7868 | 0.0097 |
| 225157_at   | MLXIP     | MLX interacting protein                                     | 0.7309 | 0.0131 |
| 225170_at   | WDR5      | WD repeat domain 5                                          | 0.6529 | 0.0321 |
| 225178_at   | TTC14     | tetratricopeptide repeat domain 14                          | 0.6063 | 0.0298 |
| 225187_at   | KIAA1967  | KIAA1967                                                    | 0.4717 | 0.0318 |
| 225191_at   | CIRBP     | cold inducible RNA binding protein                          | 1.1156 | 0.0002 |
| 225208_s_at | FAM103A1  | family with sequence similarity 103; member A1              | 0.8775 | 0.0055 |
| 225210_s_at | FAM103A1  | family with sequence similarity 103; member A1              | 0.6421 | 0.0044 |
| 225219_at   | SMAD5     | SMAD family member 5                                        | 0.6097 | 0.001  |
| 225224_at   | C20orf112 | chromosome 20 open reading frame 112                        | 1.9166 | 0      |
| 225235_at   | TSPAN17   | tetraspanin 17                                              | 1.2544 | 0.0014 |
| 225246_at   | STIM2     | stromal interaction molecule 2                              | 0.8217 | 0.0018 |
| 225247_at   | C19orf6   | chromosome 19 open reading frame 6                          | 0.5545 | 0      |
| 225248_at   | SPPL2B    | signal peptide peptidase-like 2B                            | 0.4255 | 0.0084 |
| 225249_at   | SPPL2B    | signal peptide peptidase-like 2B                            | 0.5341 | 0.0004 |
| 225250_at   | STIM2     | stromal interaction molecule 2                              | 0.3307 | 0.0105 |
| 225251_at   | RAB24     | RAB24; member RAS oncogene family                           | 0.5566 | 0.012  |
| 225267_at   | KPNA4     | karyopherin alpha 4 (importin alpha 3)                      | 0.7017 | 0.0001 |
| 225268_at   | KPNA4     | karyopherin alpha 4 (importin alpha 3)                      | 0.7602 | 0      |
| 225278_at   | PRKAB2    | protein kinase; AMP-activated; beta 2 non-catalytic subunit | 2.1081 | 0      |
| 225288_at   | COL27A1   | collagen; type XXVII; alpha 1                               | 1.6227 | 0.025  |
| 225292_at   | COL27A1   | collagen; type XXVII; alpha 1                               | 1.168  | 0.0126 |
| 225296_at   | ZNF317    | zinc finger protein 317                                     | 0.9551 | 0      |
| 225300_at   | C15orf23  | chromosome 15 open reading frame 23                         | 1.7221 | 0.0001 |
| 225313_at   | C20orf177 | chromosome 20 open reading frame 177                        | 1.3535 | 0.0007 |
| 225314_at   | OCIAD2    | OCIA domain containing 2                                    | 0.814  | 0.0244 |
| 225320_at   | CCDC109A  | coiled-coil domain containing 109A                          | 0.5929 | 0.0024 |
| 225321_s_at | PILRB     | paired immunoglobulin-like type 2 receptor beta             | 0.8027 | 0.0008 |
| 225326_at   | RBM27     | RNA binding motif protein 27                                | 0.7568 | 0.0001 |
| 225342_at   | AK3L2     | adenylate kinase 3-like 2                                   | 3.7585 | 0.0001 |
| 225361_x_at | FAM122B   | family with sequence similarity 122B                        | 0.6777 | 0.0013 |

|             |          |                                                                      |        |        |
|-------------|----------|----------------------------------------------------------------------|--------|--------|
| 225362_at   | FAM122B  | family with sequence similarity 122B                                 | 1.3994 | 0.0001 |
| 225364_at   | STK4     | serine/threonine kinase 4                                            | 0.7204 | 0.0005 |
| 225385_s_at | HNRPLL   | heterogeneous nuclear ribonucleoprotein L-like                       | 0.5053 | 0.0042 |
| 225387_at   | TSPAN5   | tetraspanin 5                                                        | 1.4775 | 0.0095 |
| 225388_at   | TSPAN5   | tetraspanin 5                                                        | 0.8723 | 0.0149 |
| 225392_at   | GFM2     | G elongation factor; mitochondrial 2                                 | 0.494  | 0.0056 |
| 225425_s_at | MRPL41   | mitochondrial ribosomal protein L41                                  | 0.4615 | 0.0031 |
| 225434_at   | DEDD2    | death effector domain containing 2                                   | 0.7065 | 0.0092 |
| 225436_at   | FAM108C1 | family with sequence similarity 108; member C1                       | 1.1458 | 0.0088 |
| 225438_at   | NUDCD1   | NudC domain containing 1                                             | 0.7216 | 0.0079 |
| 225439_at   | NUDCD1   | NudC domain containing 1                                             | 0.6704 | 0.0338 |
| 225444_at   | FLJ25778 | hypothetical protein FLJ25778                                        | 0.8925 | 0.0015 |
| 225445_at   | FLJ25778 | hypothetical protein FLJ25778                                        | 0.762  | 0.0021 |
| 225446_at   | BRWD1    | bromodomain and WD repeat domain containing 1                        | 0.5911 | 0.0381 |
| 225454_at   | CCDC124  | coiled-coil domain containing 124                                    | 0.7645 | 0.0001 |
| 225457_s_at | LOC25845 | hypothetical LOC25845                                                | 0.8969 | 0.0004 |
| 225458_at   | LOC25845 | hypothetical LOC25845                                                | 0.917  | 0.0012 |
| 225463_x_at | GPR89A   | G protein-coupled receptor 89A                                       | 0.5467 | 0.0049 |
| 225465_at   | MAGI1    | membrane associated guanylate kinase; WW and PDZ domain containing 1 | 1.0716 | 0.0001 |
| 225467_s_at | RDH13    | retinol dehydrogenase 13 (all-trans/9-cis)                           | 1.4943 | 0.0005 |
| 225474_at   | MAGI1    | membrane associated guanylate kinase; WW and PDZ domain containing 1 | 1.6436 | 0.0001 |
| 225484_at   | TSGA14   | testis specific; 14                                                  | 0.6158 | 0.0039 |
| 225485_at   | TSGA14   | testis specific; 14                                                  | 0.7993 | 0.0177 |
| 225490_at   | ARID2    | AT rich interactive domain 2 (ARID; RFX-like)                        | 0.6869 | 0.0024 |
| 225527_at   | CEBPG    | CCAAT/enhancer binding protein (C/EBP); gamma                        | 1.3141 | 0.0001 |
| 225529_at   | CENTB5   | centaurin; beta 5                                                    | 0.5286 | 0.0355 |
| 225533_at   | PHF19    | PHD finger protein 19                                                | 0.7704 | 0.0157 |
| 225538_at   | ZCCHC9   | zinc finger; CCHC domain containing 9                                | 1.1164 | 0.0003 |
| 225542_at   | CENTB5   | centaurin; beta 5                                                    | 0.3039 | 0.0118 |
| 225543_at   | GTF3C4   | general transcription factor IIIC; polypeptide 4; 90kDa              | 1.0779 | 0.0029 |
| 225545_at   | EEF2K    | eukaryotic elongation factor-2 kinase                                | 0.6271 | 0.044  |
| 225554_s_at | ANAPC7   | anaphase promoting complex subunit 7                                 | 0.411  | 0.0012 |
| 225584_at   | HCG18    | HLA complex group 18                                                 | 0.3363 | 0.0053 |
| 225586_at   | WDR85    | WD repeat domain 85                                                  | 0.4864 | 0.0395 |
| 225590_at   | SH3RF1   | SH3 domain containing ring finger 1                                  | 0.4138 | 0.0154 |
| 225592_at   | NRM      | nurim (nuclear envelope membrane protein)                            | 1.0095 | 0.0013 |

|             |               |                                                                                             |        |        |
|-------------|---------------|---------------------------------------------------------------------------------------------|--------|--------|
| 225599_s_at | LOC286144     | hypothetical protein LOC286144                                                              | 0.6784 | 0.021  |
| 225600_at   | LOC286144     | hypothetical protein LOC286144                                                              | 0.8184 | 0.0438 |
| 225601_at   | HMGB3         | high-mobility group box 3                                                                   | 1.6507 | 0.0006 |
| 225609_at   | GSR           | glutathione reductase                                                                       | 0.4619 | 0.0391 |
| 225610_at   | UHRF2         | ubiquitin-like; containing PHD and RING finger domains; 2                                   | 0.5053 | 0.0132 |
| 225617_at   | ODF2          | outer dense fiber of sperm tails 2                                                          | 1.1129 | 0.0023 |
| 225620_at   | RAB35         | RAB35; member RAS oncogene family                                                           | 0.7181 | 0.0037 |
| 225623_at   | KIAA1737      | KIAA1737                                                                                    | 0.7925 | 0.0031 |
| 225625_at   | ALKBH2        | alkB; alkylation repair homolog 2 (E. coli)                                                 | 0.5409 | 0.0117 |
| 225637_at   | DEF8          | differentially expressed in FDCP 8 homolog (mouse)                                          | 0.6566 | 0.0016 |
| 225640_at   | LOC401504     | hypothetical gene supported by AK091718                                                     | 0.5447 | 0.0185 |
| 225648_at   | STK35         | serine/threonine kinase 35                                                                  | 0.5501 | 0.0404 |
| 225649_s_at | STK35         | serine/threonine kinase 35                                                                  | 0.4448 | 0.0243 |
| 225650_at   | SAMD1         | sterile alpha motif domain containing 1                                                     | 0.4717 | 0.0193 |
| 225654_at   | LOC202347     | hypothetical protein LOC202347                                                              | 0.192  | 0.0267 |
| 225655_at   | UHRF1         | ubiquitin-like; containing PHD and RING finger domains; 1                                   | 2.4233 | 0.0004 |
| 225659_at   | LOC339745     | hypothetical protein LOC339745                                                              | 0.3542 | 0.0214 |
| 225668_at   | LOC134145     | hypothetical protein LOC134145                                                              | 0.5118 | 0.001  |
| 225674_at   | BCAP29        | B-cell receptor-associated protein 29                                                       | 0.736  | 0.0049 |
| 225680_at   | DKFZp434K1815 | hypothetical protein DKFZp434K1815                                                          | 0.5029 | 0.0191 |
| 225681_at   | CTHRC1        | collagen triple helix repeat containing 1                                                   | 2.8396 | 0.0015 |
| 225683_x_at | PHPT1         | phosphohistidine phosphatase 1                                                              | 0.3203 | 0.0439 |
| 225684_at   | FAM33A        | family with sequence similarity 33; member A                                                | 1.0145 | 0      |
| 225686_at   | FAM33A        | family with sequence similarity 33; member A                                                | 1.2635 | 0.0001 |
| 225687_at   | FAM83D        | family with sequence similarity 83; member D                                                | 3.0098 | 0.0001 |
| 225700_at   | GLCC11        | glucocorticoid induced transcript 1                                                         | 0.3542 | 0.003  |
| 225702_at   | C8orf76       | chromosome 8 open reading frame 76                                                          | 0.5659 | 0.0233 |
| 225706_at   | GLCC11        | glucocorticoid induced transcript 1                                                         | 1.3487 | 0      |
| 225713_at   | STK11IP       | serine/threonine kinase 11 interacting protein                                              | 0.7991 | 0.0021 |
| 225716_at   |               | Full-length cDNA clone CS0DK008YI09 of HeLa cells Cot 25-normalized of Homo sapiens (human) | 1.5251 | 0.0004 |
| 225717_at   | KIAA1715      | KIAA1715                                                                                    | 1.4563 | 0      |
| 225718_at   | KIAA1715      | KIAA1715                                                                                    | 1.0742 | 0.0153 |
| 225723_at   | C6orf129      | chromosome 6 open reading frame 129                                                         | 0.8465 | 0.0053 |
| 225730_s_at | THUMPD3       | THUMP domain containing 3                                                                   | 0.8316 | 0.0258 |
| 225731_at   | ANKRD50       | ankyrin repeat domain 50                                                                    | 0.8031 | 0.006  |

|             |           |                                                                                                                           |        |        |
|-------------|-----------|---------------------------------------------------------------------------------------------------------------------------|--------|--------|
| 225735_at   | ANKRD50   | ankyrin repeat domain 50                                                                                                  | 1.0989 | 0.0035 |
| 225741_at   | THUMPD3   | THUMP domain containing 3                                                                                                 | 0.5257 | 0.0199 |
| 225742_at   | MDM4      | Mdm4; transformed 3T3 cell double minute 4; p53 binding protein (mouse)                                                   | 0.9691 | 0.0054 |
| 225743_at   | RPUSD3    | RNA pseudouridylate synthase domain containing 3                                                                          | 0.6636 | 0.0359 |
| 225745_at   | LRP6      | low density lipoprotein receptor-related protein 6                                                                        | 1.3194 | 0.0006 |
| 225750_at   |           | CDNA FLJ14162 fis; clone NT2RM4002504                                                                                     | 1.8434 | 0      |
| 225761_at   | PAPD4     | PAP associated domain containing 4                                                                                        | 0.5237 | 0.0086 |
| 225765_at   | TNPO1     | transportin 1                                                                                                             | 0.6398 | 0.0016 |
| 225766_s_at | TNPO1     | transportin 1                                                                                                             | 1.0306 | 0.0013 |
| 225768_at   | NR1D2     | nuclear receptor subfamily 1; group D; member 2                                                                           | 0.7591 | 0.0131 |
| 225770_at   | RSPRY1    | ring finger and SPRY domain containing 1                                                                                  | 0.8376 | 0.0008 |
| 225774_at   | RSPRY1    | ring finger and SPRY domain containing 1                                                                                  | 0.9881 | 0.0028 |
| 225777_at   | C9orf140  | chromosome 9 open reading frame 140                                                                                       | 0.6191 | 0.0026 |
| 225784_s_at | KIAA1166  | KIAA1166                                                                                                                  | 0.6816 | 0.0348 |
| 225790_at   | MSRB3     | methionine sulfoxide reductase B3                                                                                         | 1.708  | 0.0037 |
| 225806_at   | JUB       | jub; ajuba homolog (Xenopus laevis)                                                                                       | 1.403  | 0.0132 |
| 225821_s_at | FAM44A    | family with sequence similarity 44; member A                                                                              | 0.7511 | 0.005  |
| 225827_at   | EIF2C2    | eukaryotic translation initiation factor 2C; 2                                                                            | 0.9629 | 0.0207 |
| 225834_at   | FAM72A    | family with sequence similarity 72; member A, family with sequence similarity 72; member B, gastric cancer up-regulated-2 | 3.1044 | 0      |
| 225836_s_at | C12orf32  | chromosome 12 open reading frame 32                                                                                       | 1.3283 | 0.0002 |
| 225837_at   | C12orf32  | chromosome 12 open reading frame 32                                                                                       | 1.4393 | 0.0001 |
| 225839_at   | RBM33     | RNA binding motif protein 33                                                                                              | 0.4288 | 0.0188 |
| 225841_at   | C1orf59   | chromosome 1 open reading frame 59                                                                                        | 1.4325 | 0.0096 |
| 225848_at   | ZNF746    | zinc finger protein 746                                                                                                   | 0.4473 | 0.0306 |
| 225852_at   | ANKRD17   | ankyrin repeat domain 17                                                                                                  | 0.5347 | 0.0069 |
| 225857_s_at | LOC388796 | hypothetical LOC388796                                                                                                    | 0.6872 | 0.0357 |
| 225858_s_at | BIRC4     | baculoviral IAP repeat-containing 4                                                                                       | 0.5285 | 0.0339 |
| 225859_at   | BIRC4     | baculoviral IAP repeat-containing 4                                                                                       | 0.4728 | 0.0183 |
| 225864_at   | FAM84B    | family with sequence similarity 84; member B                                                                              | 0.706  | 0.0492 |
| 225868_at   | TRIM47    | tripartite motif-containing 47                                                                                            | 1.5518 | 0.0028 |
| 225879_at   | TSEN54    | tRNA splicing endonuclease 54 homolog (S. cerevisiae)                                                                     | 0.4877 | 0.0398 |
| 225881_at   | SLC35B4   | solute carrier family 35; member B4                                                                                       | 0.6903 | 0.0015 |
| 225885_at   | EEA1      | early endosome antigen 1                                                                                                  | 0.5011 | 0.0048 |

|             |               |                                                                                                                                                                     |        |        |
|-------------|---------------|---------------------------------------------------------------------------------------------------------------------------------------------------------------------|--------|--------|
| 225888_at   | C12orf30      | chromosome 12 open reading frame 30                                                                                                                                 | 0.9143 | 0      |
| 225891_at   | C9orf75       | chromosome 9 open reading frame 75                                                                                                                                  | 0.7527 | 0.0004 |
| 225898_at   | WDR54         | WD repeat domain 54                                                                                                                                                 | 1.8786 | 0.0009 |
| 225899_x_at | FLJ45445      | hypothetical LOC399844, hypothetical LOC402483, hypothetical LOC653340, hypothetical protein LOC728797, hypothetical protein LOC729660, similar to FLJ45445 protein | 1.3492 | 0.0003 |
| 225903_at   | PIGU          | phosphatidylinositol glycan anchor biosynthesis; class U                                                                                                            | 1.0231 | 0.0014 |
| 225904_at   | C1orf96       | chromosome 1 open reading frame 96                                                                                                                                  | 1.2486 | 0.0004 |
| 225912_at   | TP53INP1      | tumor protein p53 inducible nuclear protein 1                                                                                                                       | 1.0586 | 0.0016 |
| 225917_at   |               | CDNA FLJ43113 fis; clone CTONG2028208                                                                                                                               | 0.5999 | 0.0026 |
| 225921_at   | NIN           | ninein (GSK3B interacting protein)                                                                                                                                  | 0.8294 | 0.0229 |
| 225943_at   | NLN           | neurolysin (metallopeptidase M3 family)                                                                                                                             | 0.5755 | 0.0292 |
| 225944_at   | NLN           | neurolysin (metallopeptidase M3 family)                                                                                                                             | 1.4432 | 0.002  |
| 225947_at   | MYOHD1        | myosin head domain containing 1                                                                                                                                     | 0.9418 | 0.0005 |
| 225948_at   | C14orf153     | chromosome 14 open reading frame 153                                                                                                                                | 0.5156 | 0.0358 |
| 225961_at   | KLHDC5        | kelch domain containing 5                                                                                                                                           | 1.0077 | 0.0002 |
| 225963_at   | KLHDC5        | kelch domain containing 5                                                                                                                                           | 0.9641 | 0      |
| 225964_at   | ZXDC          | ZXD family zinc finger C                                                                                                                                            | 0.6989 | 0.0007 |
| 225965_at   | DDHD1         | DDHD domain containing 1                                                                                                                                            | 0.6035 | 0.0044 |
| 225969_at   | ALKBH6        | alkB; alkylation repair homolog 6 (E. coli)                                                                                                                         | 0.9171 | 0.0021 |
| 225970_at   | DDHD1         | DDHD domain containing 1                                                                                                                                            | 0.7963 | 0.0054 |
| 225971_at   |               | CDNA FLJ34209 fis; clone FCBBF3020599                                                                                                                               | 0.7505 | 0.0177 |
| 225986_x_at | CPSF2         | cleavage and polyadenylation specific factor 2; 100kDa                                                                                                              | 0.4503 | 0.0118 |
| 226003_at   | KIF21A        | kinesin family member 21A                                                                                                                                           | 0.8456 | 0.0154 |
| 226004_at   | CABLES2       | Cdk5 and Abl enzyme substrate 2                                                                                                                                     | 0.7727 | 0.0049 |
| 226009_at   | RP11-529I10.4 | deleted in a mouse model of primary ciliary dyskinesia                                                                                                              | 0.867  | 0.0026 |
| 226015_at   | ZNF12         | zinc finger protein 12                                                                                                                                              | 0.9413 | 0      |
| 226027_at   | C9orf119      | chromosome 9 open reading frame 119                                                                                                                                 | 1.1048 | 0.0033 |
| 226031_at   | CCDC132       | coiled-coil domain containing 132                                                                                                                                   | 0.6036 | 0.0085 |
| 226032_at   | CASP2         | caspase 2; apoptosis-related cysteine peptidase (neural precursor cell expressed; developmentally down-regulated 2)                                                 | 1.7098 | 0      |
| 226033_at   | USP31         | ubiquitin specific peptidase 31                                                                                                                                     | 0.5887 | 0.0083 |
| 226035_at   | USP31         | ubiquitin specific peptidase 31                                                                                                                                     | 1.4405 | 0.0001 |
| 226041_at   | NAPE-PLD      | N-acyl-phosphatidylethanolamine-hydrolyzing phospholipase D                                                                                                         | 1.0161 | 0.013  |
| 226042_at   | EDC3          | enhancer of mRNA decapping 3 homolog (S. cerevisiae)                                                                                                                | 0.4985 | 0.0003 |

|             |           |                                                                                                                                  |        |        |
|-------------|-----------|----------------------------------------------------------------------------------------------------------------------------------|--------|--------|
| 226044_at   | TDP1      | tyrosyl-DNA phosphodiesterase 1                                                                                                  | 0.4006 | 0.0072 |
| 226048_at   | MAPK8     | mitogen-activated protein kinase 8                                                                                               | 0.5904 | 0.0487 |
| 226052_at   |           | Transcribed locus                                                                                                                | 0.4574 | 0.0009 |
| 226054_at   | BRD4      | bromodomain containing 4                                                                                                         | 0.9046 | 0.0001 |
| 226062_x_at | FAM63A    | family with sequence similarity 63; member A                                                                                     | 0.5721 | 0.003  |
| 226070_at   | C9orf142  | chromosome 9 open reading frame 142                                                                                              | 0.4197 | 0.024  |
| 226076_s_at | MBD6      | methyl-CpG binding domain protein 6                                                                                              | 1.3661 | 0.0013 |
| 226082_s_at | SFRS15    | splicing factor; arginine/serine-rich 15                                                                                         | 0.5757 | 0.0226 |
| 226085_at   |           | CDNA clone IMAGE:4842353                                                                                                         | 1.4184 | 0.0011 |
| 226088_at   | ZDHHC12   | zinc finger; DHHC-type containing 12                                                                                             | 0.5176 | 0.0057 |
| 226098_at   | IFT80     | intraflagellar transport 80 homolog (Chlamydomonas)                                                                              | 0.5483 | 0.0276 |
| 226102_at   |           | Full-length cDNA clone CS0DF010YE22 of Fetal brain of Homo sapiens (human)                                                       | 0.8132 | 0.0419 |
| 226105_at   |           | Full-length cDNA clone CS0DI084YF13 of Placenta Cot 25-normalized of Homo sapiens (human)                                        | 0.5859 | 0.0237 |
| 226107_at   |           | CDNA FLJ13495 fis; clone PLACE1004425, Full-length cDNA clone CS0DI084YF13 of Placenta Cot 25-normalized of Homo sapiens (human) | 0.7771 | 0.0011 |
| 226108_at   | NHN1      | conserved nuclear protein NHN1                                                                                                   | 0.9624 | 0.0002 |
| 226113_at   | ZNF436    | zinc finger protein 436                                                                                                          | 0.947  | 0.0054 |
| 226114_at   | ZNF436    | zinc finger protein 436                                                                                                          | 0.9682 | 0.0066 |
| 226115_at   | AHCTF1    | AT hook containing transcription factor 1                                                                                        | 0.8026 | 0.0012 |
| 226117_at   | TIFA      | TRAF-interacting protein with a forkhead-associated domain                                                                       | 1.5093 | 0.0008 |
| 226118_at   | CENPO     | centromere protein O                                                                                                             | 0.8079 | 0.0075 |
| 226121_at   | DHRS13    | dehydrogenase/reductase (SDR family) member 13                                                                                   | 1.6163 | 0.0004 |
| 226124_at   | ZFP90     | zinc finger protein 90 homolog (mouse)                                                                                           | 1.0483 | 0.0033 |
| 226125_at   |           | CDNA clone IMAGE:4346813                                                                                                         | 0.5615 | 0.034  |
| 226132_s_at | MANEAL    | mannosidase; endo-alpha-like                                                                                                     | 1.6177 | 0.0004 |
| 226149_at   | C20orf198 | chromosome 20 open reading frame 198                                                                                             | 0.8272 | 0.006  |
| 226156_at   | AKT2      | v-akt murine thymoma viral oncogene homolog 2                                                                                    | 1.2178 | 0.0024 |
| 226159_at   | LOC285636 | hypothetical protein LOC285636                                                                                                   | 0.709  | 0      |
| 226163_at   | SYNGAP1   | synaptic Ras GTPase activating protein 1 homolog (rat), zinc finger and BTB domain containing 9                                  | 0.361  | 0.0454 |
| 226164_x_at | FAM80B    | Family with sequence similarity 80; member B                                                                                     | 0.9338 | 0.0277 |
| 226176_s_at | USP42     | ubiquitin specific peptidase 42                                                                                                  | 1.1462 | 0.0001 |
| 226201_at   |           | MRNA; cDNA DKFZp586P1823 (from clone DKFZp586P1823)                                                                              | 0.5625 | 0.0451 |

|             |          |                                                                                                                                                                                                                        |        |        |
|-------------|----------|------------------------------------------------------------------------------------------------------------------------------------------------------------------------------------------------------------------------|--------|--------|
| 226202_at   | ZNF398   | zinc finger protein 398                                                                                                                                                                                                | 0.9871 | 0.0035 |
| 226207_at   | FLJ39378 | hypothetical protein FLJ39378                                                                                                                                                                                          | 0.8709 | 0.0083 |
| 226209_at   | NDUFV3   | NADH dehydrogenase (ubiquinone) flavoprotein 3; 10kDa                                                                                                                                                                  | 0.4775 | 0.0183 |
| 226215_s_at | FBXL10   | F-box and leucine-rich repeat protein 10                                                                                                                                                                               | 1.7376 | 0      |
| 226216_at   | INSR     | insulin receptor                                                                                                                                                                                                       | 0.9627 | 0.0378 |
| 226221_at   | KIAA1432 | KIAA1432                                                                                                                                                                                                               | 0.5926 | 0.0004 |
| 226228_at   | AQP4     | aquaporin 4                                                                                                                                                                                                            | 0.127  | 0.0277 |
| 226247_at   | PLEKHA1  | pleckstrin homology domain containing; family A (phosphoinositide binding specific) member 1                                                                                                                           | 1.4406 | 0      |
| 226249_at   | SNX30    | sorting nexin family member 30                                                                                                                                                                                         | 0.6614 | 0.0273 |
| 226255_at   | ZBTB33   | zinc finger and BTB domain containing 33                                                                                                                                                                               | 0.4687 | 0.0447 |
| 226258_at   | AMN1     | antagonist of mitotic exit network 1 homolog (S. cerevisiae)                                                                                                                                                           | 0.9481 | 0.01   |
| 226263_at   | C6orf151 | chromosome 6 open reading frame 151                                                                                                                                                                                    | 0.4839 | 0.0333 |
| 226270_at   | EXOC2    | exocyst complex component 2                                                                                                                                                                                            | 0.3873 | 0.0469 |
| 226273_at   | CLCN5    | chloride channel 5 (nephrolithiasis 2; X-linked; Dent disease)                                                                                                                                                         | 0.9019 | 0.0054 |
| 226274_at   | CLCN5    | chloride channel 5 (nephrolithiasis 2; X-linked; Dent disease)                                                                                                                                                         | 1.4701 | 0.0023 |
| 226277_at   |          | CDNA FLJ43397 fis; clone OCBBF2009788                                                                                                                                                                                  | 0.3418 | 0.004  |
| 226279_at   | PRSS23   | protease; serine; 23                                                                                                                                                                                                   | 1.2143 | 0.0067 |
| 226287_at   | CCDC34   | coiled-coil domain containing 34                                                                                                                                                                                       | 1.0231 | 0.0018 |
| 226289_at   | CAPRN1   | cell cycle associated protein 1                                                                                                                                                                                        | 0.5491 | 0.0374 |
| 226290_at   | BDP1     | B double prime 1; subunit of RNA polymerase III transcription initiation factor IIIB                                                                                                                                   | 0.6367 | 0      |
| 226291_at   | ALS2     | amyotrophic lateral sclerosis 2 (juvenile)                                                                                                                                                                             | 0.9642 | 0.0193 |
| 226294_x_at | FAM91A1  | family with sequence similarity 91; member A1                                                                                                                                                                          | 0.3198 | 0.0099 |
| 226306_at   | C6orf1   | chromosome 6 open reading frame 1                                                                                                                                                                                      | 0.605  | 0.0376 |
| 226310_at   | RICTOR   | rapamycin-insensitive companion of mTOR                                                                                                                                                                                | 1.0578 | 0.001  |
| 226312_at   | RICTOR   | rapamycin-insensitive companion of mTOR                                                                                                                                                                                | 0.6226 | 0.0052 |
| 226313_at   | C10orf35 | chromosome 10 open reading frame 35                                                                                                                                                                                    | 0.6242 | 0      |
| 226327_at   | ZNF507   | zinc finger protein 507                                                                                                                                                                                                | 0.6874 | 0.0036 |
| 226336_at   | PPIA     | peptidylprolyl isomerase A (cyclophilin A)                                                                                                                                                                             | 0.8729 | 0.0001 |
| 226337_at   | SCYL1BP1 | SCY1-like 1 binding protein 1                                                                                                                                                                                          | 0.783  | 0.0108 |
| 226340_x_at | CXYorf1  | CXYorf1-related protein, chromosomes X and Y open reading frame 1, family with sequence similarity 39; member B, family with sequence similarity 39; member D pseudogene, family with sequence similarity 39; member E | 0.3513 | 0.0389 |

|             |           |                                                                                                                                              |        |        |
|-------------|-----------|----------------------------------------------------------------------------------------------------------------------------------------------|--------|--------|
| 226346_at   | MEX3A     | mex-3 homolog A (C. elegans)                                                                                                                 | 0.237  | 0.0208 |
| 226347_at   |           |                                                                                                                                              | 0.8152 | 0.0167 |
| 226348_at   |           |                                                                                                                                              | 0.9219 | 0.028  |
| 226350_at   | CHML      | choroideremia-like (Rab escort protein 2)                                                                                                    | 1.848  | 0      |
| 226355_at   | WDR51A    | WD repeat domain 51A                                                                                                                         | 0.7982 | 0.0039 |
| 226362_at   |           | Clone HLS_IMAGE_767345 mRNA sequence                                                                                                         | 0.8142 | 0.0022 |
| 226364_at   | HIP1      | Huntingtin interacting protein 1                                                                                                             | 0.7774 | 0.0103 |
| 226365_at   |           | CDNA FLJ40901 fis; clone UTERU2003704, Clone HLS_IMAGE_767345 mRNA sequence                                                                  | 1.3584 | 0.0003 |
| 226368_at   | CHST11    | Carbohydrate (chondroitin 4) sulfotransferase 11                                                                                             | 0.9136 | 0.0221 |
| 226369_at   | LOC338799 | hypothetical locus LOC338799                                                                                                                 | 0.4497 | 0.0044 |
| 226384_at   | PPAPDC1B  | phosphatidic acid phosphatase type 2 domain containing 1B                                                                                    | 0.9262 | 0.016  |
| 226387_at   | RSBN1L    | round spermatid basic protein 1-like                                                                                                         | 0.6623 | 0.0057 |
| 226390_at   | STARD4    | StAR-related lipid transfer (START) domain containing 4                                                                                      | 1.4431 | 0.0103 |
| 226391_at   |           | CDNA FLJ36704 fis; clone UTERU2009335                                                                                                        | 0.6024 | 0.0289 |
| 226397_s_at |           | Transcribed locus                                                                                                                            | 1.1726 | 0.0013 |
| 226404_at   | LOC643167 | RNA binding motif protein 39, similar to RNA-binding region-containing protein 2 (Hepatocellular carcinoma protein 1) (Splicing factor HCC1) | 0.9427 | 0.0058 |
| 226410_at   | LOC348180 | hypothetical protein LOC348180                                                                                                               | 0.5385 | 0.004  |
| 226412_at   | SFRS18    | splicing factor; arginine/serine-rich 18                                                                                                     | 1.0481 | 0.0001 |
| 226413_at   | LOC400027 | hypothetical gene supported by BC047417                                                                                                      | 0.6348 | 0.0197 |
| 226416_at   | THEX1     | three prime histone mRNA exonuclease 1                                                                                                       | 1.0268 | 0.0013 |
| 226418_at   | ERGIC2    | ERGIC and golgi 2                                                                                                                            | 0.6159 | 0.0038 |
| 226420_at   | EVI1      | ecotropic viral integration site 1                                                                                                           | 1.2186 | 0.0002 |
| 226422_at   | ERGIC2    | ERGIC and golgi 2                                                                                                                            | 0.5747 | 0      |
| 226428_at   | TNPO2     | transportin 2 (importin 3; karyopherin beta 2b)                                                                                              | 0.5502 | 0.0156 |
| 226430_at   | RELL1     | RELT-like 1                                                                                                                                  | 0.6764 | 0.0312 |
| 226432_at   | ETNK1     | ethanolamine kinase 1                                                                                                                        | 0.8625 | 0.005  |
| 226437_at   | YIF1B     | Yip1 interacting factor homolog B (S. cerevisiae)                                                                                            | 1.3426 | 0      |
| 226443_at   | FAM122A   | family with sequence similarity 122A                                                                                                         | 0.8425 | 0.0149 |
| 226444_at   |           | CDNA FLJ31108 fis; clone IMR322000164                                                                                                        | 1.2012 | 0.0006 |
| 226456_at   | C16orf75  | chromosome 16 open reading frame 75                                                                                                          | 3.3997 | 0      |
| 226458_at   |           | CDNA FLJ30340 fis; clone BRACE2007411                                                                                                        | 0.8289 | 0.0225 |
| 226463_at   | ATP6V1C1  | ATPase; H+ transporting; lysosomal 42kDa; V1 subunit C1                                                                                      | 0.4658 | 0.0491 |



|             |           |                                                                                 |        |        |
|-------------|-----------|---------------------------------------------------------------------------------|--------|--------|
| 226464_at   | C3orf58   | chromosome 3 open reading frame 58                                              | 0.714  | 0.0018 |
| 226469_s_at | GGTL3     | gamma-glutamyltransferase-like 3                                                | 0.4316 | 0.027  |
| 226470_at   | GGTL3     | gamma-glutamyltransferase-like 3                                                | 0.9294 | 0.005  |
| 226471_at   | GGTL3     | gamma-glutamyltransferase-like 3                                                | 0.5226 | 0.0178 |
| 226480_at   | KIF2A     | Kinesin heavy chain member 2A                                                   | 0.9544 | 0.0007 |
| 226489_at   | TMCC3     | transmembrane and coiled-coil domain family 3                                   | 0.6506 | 0.0028 |
| 226492_at   | SEMA6D    | sema domain; transmembrane domain (TM); and cytoplasmic domain; (semaphorin) 6D | 1.1795 | 0.0469 |
| 226494_at   | KIAA1543  | KIAA1543                                                                        | 0.3946 | 0.0285 |
| 226497_s_at |           | CDNA FLJ35153 fis; clone PLACE6010765                                           | 1.209  | 0.0069 |
| 226498_at   |           | CDNA FLJ35153 fis; clone PLACE6010765                                           | 1.2448 | 0.0071 |
| 226503_at   | RIF1      | RAP1 interacting factor homolog (yeast)                                         | 0.6726 | 0.0194 |
| 226513_at   | LOC145758 | hypothetical protein LOC145758                                                  | 0.9335 | 0.0057 |
| 226514_at   | ZNF71     | zinc finger protein 71                                                          | 0.3936 | 0.001  |
| 226520_at   |           | Primary neuroblastoma cDNA; clone:Nbla11485                                     | 0.9071 | 0.0046 |
| 226531_at   | ORAI1     | ORAI calcium release-activated calcium modulator 1                              | 0.848  | 0.0036 |
| 226539_s_at |           |                                                                                 | 0.3814 | 0.0061 |
| 226546_at   |           | CDNA clone IMAGE:5268696                                                        | 1.3    | 0.0006 |
| 226548_at   | SBK1      | SH3-binding domain kinase 1                                                     | 1.0096 | 0.0038 |
| 226549_at   | SBK1      | SH3-binding domain kinase 1                                                     | 0.6034 | 0.0167 |
| 226554_at   | ZBTB7A    | zinc finger and BTB domain containing 7A                                        | 0.7939 | 0.0013 |
| 226562_at   | ZSCAN29   | zinc finger and SCAN domain containing 29                                       | 0.4631 | 0.028  |
| 226569_s_at | CHTF18    | CTF18; chromosome transmission fidelity factor 18 homolog (S. cerevisiae)       | 1.0288 | 0      |
| 226583_at   | FLJ40142  | FLJ40142 protein                                                                | 1.705  | 0      |
| 226590_at   | ZNF618    | zinc finger protein 618                                                         | 0.7614 | 0.0197 |
| 226592_at   | ZNF618    | zinc finger protein 618                                                         | 1.2087 | 0.0026 |
| 226600_at   | TMTC3     | transmembrane and tetratricopeptide repeat containing 3                         | 1.5942 | 0      |
| 226603_at   | SAMD9L    | sterile alpha motif domain containing 9-like                                    | 1.1329 | 0.0457 |
| 226604_at   | TMTC3     | transmembrane and tetratricopeptide repeat containing 3                         | 0.6715 | 0.0143 |
| 226608_at   | LOC388272 | similar to RIKEN cDNA 4921524J17                                                | 1.0943 | 0.0049 |
| 226612_at   | FLJ25076  | similar to CG4502-PA                                                            | 2.0384 | 0.0073 |
| 226618_at   | FLJ25076  | similar to CG4502-PA                                                            | 1.4045 | 0.007  |
| 226619_at   | SEN1      | SUMO1/sentrin specific peptidase 1                                              | 1.1585 | 0      |
| 226628_at   | THOC2     | THO complex 2                                                                   | 0.9419 | 0.0009 |
| 226630_at   | C14orf106 | chromosome 14 open reading frame 106                                            | 1.4237 | 0.0002 |
| 226639_at   | SFT2D3    | SFT2 domain containing 3                                                        | 0.9407 | 0.0003 |

|             |           |                                                                                                |        |        |
|-------------|-----------|------------------------------------------------------------------------------------------------|--------|--------|
| 226642_s_at | NUDCD2    | NudC domain containing 2                                                                       | 0.6969 | 0.0288 |
| 226649_at   | PANK1     | pantothenate kinase 1                                                                          | 0.7342 | 0.0183 |
| 226651_at   | HOMER1    | homer homolog 1 (Drosophila)                                                                   | 1.3827 | 0.0003 |
| 226655_at   |           | Full-length cDNA clone CS0DB009YL20 of Neuroblastoma Cot 10-normalized of Homo sapiens (human) | 0.5591 | 0.0033 |
| 226661_at   | CDCA2     | cell division cycle associated 2                                                               | 1.4805 | 0.0016 |
| 226663_at   | ANKRD10   | ankyrin repeat domain 10                                                                       | 1.7089 | 0.0004 |
| 226666_at   |           | MRNA; cDNA DKFZp564M243 (from clone DKFZp564M243)                                              | 0.6837 | 0.0471 |
| 226669_at   | USP42     | ubiquitin specific peptidase 42                                                                | 0.9809 | 0.0009 |
| 226698_at   | FCHSD1    | FCH and double SH3 domains 1                                                                   | 0.3071 | 0.0187 |
| 226699_at   | FCHSD1    | FCH and double SH3 domains 1                                                                   | 0.1349 | 0.0467 |
| 226705_at   | FGFR1     | fibroblast growth factor receptor 1 (fms-related tyrosine kinase 2; Pfeiffer syndrome)         | 2.3572 | 0.0001 |
| 226720_at   | MST101    | MSTP101                                                                                        | 0.6207 | 0.0234 |
| 226732_at   | RBM33     | RNA binding motif protein 33                                                                   | 0.4002 | 0.0289 |
| 226747_at   | TXNDC16   | thioredoxin domain containing 16                                                               | 0.8771 | 0.006  |
| 226754_at   | ZNF251    | zinc finger protein 251                                                                        | 0.6284 | 0.0006 |
| 226762_at   | PURB      | purine-rich element binding protein B                                                          | 0.9016 | 0.0041 |
| 226764_at   | LOC152485 | hypothetical protein LOC152485                                                                 | 0.7925 | 0.0324 |
| 226777_at   | ADAM12    | ADAM metallopeptidase domain 12 (meltrin alpha)                                                | 1.3755 | 0.0125 |
| 226779_at   |           | CDNA FLJ37302 fis; clone BRAMY2016009                                                          | 0.6743 | 0.0025 |
| 226786_at   | RFX1      | regulatory factor X; 1 (influences HLA class II expression)                                    | 0.3834 | 0.0098 |
| 226791_at   | KIFC2     | kinesin family member C2                                                                       | 1.0919 | 0.0129 |
| 226792_s_at | KIFC2     | kinesin family member C2                                                                       | 0.527  | 0.0319 |
| 226807_at   | ZFP1      | zinc finger protein 1 homolog (mouse)                                                          | 0.9072 | 0.0018 |
| 226808_at   | LOC643641 | hypothetical protein LOC643641                                                                 | 1.7922 | 0      |
| 226819_at   |           | CDNA FLJ30735 fis; clone FEBRA2000228                                                          | 0.3739 | 0.0108 |
| 226823_at   | PHACTR4   | phosphatase and actin regulator 4                                                              | 0.6016 | 0.008  |
| 226826_at   |           | CDNA FLJ30735 fis; clone FEBRA2000228                                                          | 0.9225 | 0.027  |
| 226839_at   | TRA16     | TR4 orphan receptor associated protein TRA16                                                   | 0.8702 | 0      |
| 226840_at   | H2AFY     | H2A histone family; member Y                                                                   | 0.8015 | 0.0002 |
| 226843_s_at | PAPD5     | PAP associated domain containing 5                                                             | 1.863  | 0      |
| 226854_at   |           |                                                                                                | 0.5578 | 0.041  |
| 226855_at   |           | CDNA FLJ40954 fis; clone UTERU2010525                                                          | 2.0728 | 0      |
| 226860_at   | TMEM19    | transmembrane protein 19                                                                       | 1.8861 | 0      |
| 226862_at   | MBD1      | methyl-CpG binding domain protein 1                                                            | 0.3028 | 0.0468 |
| 226871_s_at | ATG4D     | ATG4 autophagy related 4 homolog D (S. cerevisiae)                                             | 0.3378 | 0.0145 |

|             |          |                                                               |        |        |
|-------------|----------|---------------------------------------------------------------|--------|--------|
| 226872_at   | RFX2     | regulatory factor X; 2 (influences HLA class II expression)   | 0.345  | 0.0355 |
| 226876_at   | FAM101B  | family with sequence similarity 101; member B                 | 1.2093 | 0.0033 |
| 226877_at   | RPL32P3  | ribosomal protein L32 pseudogene 3                            | 0.8209 | 0.0065 |
| 226880_at   | NUCKS1   | nuclear casein kinase and cyclin-dependent kinase substrate 1 | 0.3685 | 0.019  |
| 226881_at   | GRPEL2   | GrpE-like 2; mitochondrial (E. coli)                          | 0.9869 | 0.0002 |
| 226886_at   |          | Clone 114 tumor rejection antigen                             | 0.7975 | 0.0014 |
| 226890_at   | WDR35    | WD repeat domain 35                                           | 0.5224 | 0.0305 |
| 226891_at   | C3orf21  | chromosome 3 open reading frame 21                            | 0.3566 | 0.0051 |
| 226897_s_at | ZC3H7A   | zinc finger CCCH-type containing 7A                           | 1.5094 | 0.0001 |
| 226905_at   | FAM101B  | family with sequence similarity 101; member B                 | 0.9098 | 0.0165 |
| 226908_at   | LRIG3    | leucine-rich repeats and immunoglobulin-like domains 3        | 0.9049 | 0.002  |
| 226912_at   | ZDHHC23  | zinc finger; DHHC-type containing 23                          | 1.0948 | 0.0016 |
| 226914_at   | ARPC5L   | actin related protein 2/3 complex; subunit 5-like             | 0.8571 | 0.0037 |
| 226916_x_at | DPP9     | dipeptidyl-peptidase 9                                        | 0.3186 | 0.0475 |
| 226927_at   | KRTHB5   | Keratin; hair; basic; 5                                       | 0.4753 | 0.0208 |
| 226936_at   | C6orf173 | chromosome 6 open reading frame 173                           | 2.85   | 0      |
| 226938_at   | WDR21A   | WD repeat domain 21A                                          | 0.7105 | 0.0122 |
| 226943_at   | KRTHB5   | Keratin; hair; basic; 5                                       | 0.575  | 0.011  |
| 226945_at   | RHBDD1   | rhomoid domain containing 1                                   | 0.7134 | 0.0051 |
| 226947_at   | GUSBL2   | glucuronidase; beta-like 2                                    | 0.5136 | 0.014  |
| 226949_at   | GOLGA3   | golgi autoantigen; golgin subfamily a; 3                      | 1.1962 | 0.0004 |
| 226961_at   | PRR15    | proline rich 15                                               | 1.3704 | 0.0176 |
| 226964_at   |          | CDNA clone IMAGE:5272626                                      | 1.2711 | 0.0001 |
| 226980_at   | DEPDC1B  | DEP domain containing 1B                                      | 2.1631 | 0.0001 |
| 226983_at   | ZNF777   | zinc finger protein 777                                       | 0.3632 | 0.0029 |
| 226986_at   | WIPI2    | WD repeat domain; phosphoinositide interacting 2              | 0.926  | 0.0031 |
| 226999_at   | RNPC3    | RNA-binding region (RNP1; RRM) containing 3                   | 0.5358 | 0.0025 |
| 227004_at   |          | Transcribed locus                                             | 1.317  | 0.0061 |
| 227012_at   | SLC25A40 | solute carrier family 25; member 40                           | 1.0703 | 0.0015 |
| 227016_at   | ERICH1   | glutamate-rich 1                                              | 0.9564 | 0      |
| 227059_at   | GPC6     | glypican 6                                                    | 1.432  | 0.0479 |
| 227068_at   | PGK1     | phosphoglycerate kinase 1                                     | 0.6297 | 0.0039 |
| 227069_at   |          | CDNA clone IMAGE:4816860                                      | 0.7094 | 0.019  |
| 227072_at   | RTTN     | rotatin                                                       | 0.7442 | 0.0106 |
| 227089_at   | HBP1     | HMG-box transcription factor 1                                | 0.4508 | 0.0136 |
| 227098_at   | DUSP18   | dual specificity phosphatase 18                               | 0.5308 | 0.0378 |
| 227101_at   | ZNF800   | zinc finger protein 800                                       | 0.6417 | 0.0091 |

|             |           |                                                                                                                                              |        |        |
|-------------|-----------|----------------------------------------------------------------------------------------------------------------------------------------------|--------|--------|
| 227102_at   | TRIM35    | tripartite motif-containing 35                                                                                                               | 0.5269 | 0.011  |
| 227103_s_at | ECE2      | endothelin converting enzyme 2                                                                                                               | 0.5683 | 0.0134 |
| 227105_at   | CSPP1     | centrosome and spindle pole associated protein 1                                                                                             | 1.4509 | 0      |
| 227106_at   | LOC440104 | similar to RIKEN cDNA 1110012D08                                                                                                             | 0.4279 | 0.0431 |
| 227108_at   | STARD9    | StAR-related lipid transfer (START) domain containing 9                                                                                      | 0.2858 | 0.0184 |
| 227117_at   |           | CDNA FLJ40762 fis; clone TRACH2002847                                                                                                        | 1.1574 | 0.001  |
| 227122_at   |           | Transcribed locus                                                                                                                            | 0.6331 | 0.0195 |
| 227123_at   | RAB3B     | RAB3B; member RAS oncogene family                                                                                                            | 1.5488 | 0.0328 |
| 227124_at   | LOC221710 | Hypothetical protein LOC221710                                                                                                               | 0.9029 | 0.0078 |
| 227129_x_at | tcag7.907 | hypothetical LOC402483                                                                                                                       | 1.3361 | 0.0003 |
| 227133_at   | CXorf39   | chromosome X open reading frame 39                                                                                                           | 0.7524 | 0.0258 |
| 227146_at   | QSOX2     | quiescin Q6 sulfhydryl oxidase 2                                                                                                             | 1.5737 | 0.0004 |
| 227152_at   | C12orf35  | chromosome 12 open reading frame 35                                                                                                          | 0.9442 | 0.0083 |
| 227156_at   | TNRC8     | trinucleotide repeat containing 8                                                                                                            | 0.9359 | 0.0092 |
| 227161_at   | NOM1      | nucleolar protein with MIF4G domain 1                                                                                                        | 1.0188 | 0.0007 |
| 227162_at   | ZBTB26    | zinc finger and BTB domain containing 26                                                                                                     | 0.9642 | 0.0006 |
| 227165_at   | C13orf3   | chromosome 13 open reading frame 3                                                                                                           | 0.4473 | 0.0079 |
| 227166_at   | DNAJC18   | DnaJ (Hsp40) homolog; subfamily C; member 18                                                                                                 | 0.4769 | 0.0237 |
| 227186_s_at | MRPL41    | mitochondrial ribosomal protein L41                                                                                                          | 0.4688 | 0.0064 |
| 227187_at   |           | Full-length cDNA clone CS0CAP007YE04 of Thymus of Homo sapiens (human)                                                                       | 0.4262 | 0.0162 |
| 227191_at   |           | Transcribed locus                                                                                                                            | 1.1455 | 0.0057 |
| 227196_at   | RHPN2     | rhophilin; Rho GTPase binding protein 2                                                                                                      | 0.9265 | 0.0106 |
| 227205_at   | TAF1      | TAF1 RNA polymerase II; TATA box binding protein (TBP)-associated factor; 250kDa                                                             | 0.9323 | 0.0007 |
| 227211_at   | PHF19     | PHD finger protein 19                                                                                                                        | 1.0472 | 0.0134 |
| 227212_s_at | PHF19     | PHD finger protein 19                                                                                                                        | 1.6106 | 0.0041 |
| 227214_at   | GOPC      | golgi associated PDZ and coiled-coil motif containing                                                                                        | 0.566  | 0.0345 |
| 227215_at   | GOPC      | golgi associated PDZ and coiled-coil motif containing                                                                                        | 0.3029 | 0.0303 |
| 227220_at   | NFXL1     | nuclear transcription factor; X-box binding-like 1                                                                                           | 1.2855 | 0      |
| 227223_at   | LOC643167 | RNA binding motif protein 39, similar to RNA-binding region-containing protein 2 (Hepatocellular carcinoma protein 1) (Splicing factor HCC1) | 0.9456 | 0.0308 |
| 227245_at   | C12orf30  | chromosome 12 open reading frame 30                                                                                                          | 0.9738 | 0.0001 |
| 227247_at   |           | MRNA; cDNA DKFZp313M1034 (from clone DKFZp313M1034)                                                                                          | 2.1064 | 0      |
| 227249_at   | NDE1      | NudE nuclear distribution gene E homolog 1 (A. nidulans)                                                                                     | 1.3187 | 0      |

|             |           |                                                                                                |        |        |
|-------------|-----------|------------------------------------------------------------------------------------------------|--------|--------|
| 227255_at   | PDIK1L    | PDLIM1 interacting kinase 1 like                                                               | 0.5842 | 0.0131 |
| 227256_at   | USP31     | ubiquitin specific peptidase 31                                                                | 1.12   | 0.0006 |
| 227257_s_at | C10orf46  | chromosome 10 open reading frame 46                                                            | 0.6883 | 0.0198 |
| 227260_at   | ANKRD10   | Ankyrin repeat domain 10                                                                       | 1.4752 | 0.0103 |
| 227267_at   | C5orf37   | chromosome 5 open reading frame 37                                                             | 2.252  | 0      |
| 227270_at   | LOC285550 | hypothetical protein LOC285550                                                                 | 0.4759 | 0.0359 |
| 227284_at   | ZNF766    | zinc finger protein 766                                                                        | 0.5487 | 0.0028 |
| 227285_at   | C1orf51   | chromosome 1 open reading frame 51                                                             | 0.8635 | 0.04   |
| 227290_at   |           | CDNA FLJ13598 fis; clone PLACE1009921                                                          | 1.9072 | 0.0087 |
| 227291_s_at | BOLA3     | bolA homolog 3 (E. coli)                                                                       | 0.4287 | 0.026  |
| 227292_at   | LOC144097 | hypothetical protein BC007540                                                                  | 0.2335 | 0.0265 |
| 227295_at   | IKIP      | IKK interacting protein                                                                        | 2.2084 | 0      |
| 227301_at   | CCT6AP1   | chaperonin containing TCP1; subunit 6A (zeta 1) pseudogene 1                                   | 1.2114 | 0      |
| 227312_at   | SNTB2     | syntrophin; beta 2 (dystrophin-associated protein A1; 59kDa; basic component 2)                | 0.9017 | 0.0147 |
| 227332_at   |           | Full-length cDNA clone CS0DD005YE10 of Neuroblastoma Cot 50-normalized of Homo sapiens (human) | 0.2712 | 0.0184 |
| 227348_at   | PARS2     | prolyl-tRNA synthetase 2; mitochondrial (putative)                                             | 0.4555 | 0.0203 |
| 227349_at   |           |                                                                                                | 0.8343 | 0.0015 |
| 227350_at   |           | CDNA FLJ11381 fis; clone HEMBA1000501                                                          | 2.4395 | 0      |
| 227363_s_at | COX4NB    | COX4 neighbor                                                                                  | 0.3704 | 0.0149 |
| 227371_at   | BAIAP2L1  | BAI1-associated protein 2-like 1                                                               | 1.28   | 0.0017 |
| 227372_s_at | BAIAP2L1  | BAI1-associated protein 2-like 1                                                               | 1.0113 | 0.0122 |
| 227374_at   | EARS2     | glutamyl-tRNA synthetase 2; mitochondrial (putative)                                           | 0.5897 | 0.0365 |
| 227383_at   | LOC727820 | hypothetical protein LOC727820                                                                 | 1.3301 | 0.0018 |
| 227384_s_at | LOC727820 | hypothetical protein LOC727820                                                                 | 0.9126 | 0.0324 |
| 227402_s_at | C8orf53   | chromosome 8 open reading frame 53                                                             | 0.7452 | 0.0012 |
| 227406_at   | GABPB2    | GA binding protein transcription factor; beta subunit 2                                        | 0.8597 | 0.0039 |
| 227410_at   | FAM43A    | family with sequence similarity 43; member A                                                   | 2.1478 | 0      |
| 227415_at   | LOC283508 | hypothetical protein LOC283508                                                                 | 0.9393 | 0.0103 |
| 227421_at   | C21orf57  | chromosome 21 open reading frame 57                                                            | 0.71   | 0.0091 |
| 227426_at   |           | Transcribed locus                                                                              | 0.3633 | 0.0161 |
| 227431_at   |           | CDNA clone IMAGE:4791585                                                                       | 0.6727 | 0.033  |
| 227438_at   | ALPK1     | alpha-kinase 1                                                                                 | 0.6044 | 0.0202 |
| 227445_at   | ZNF689    | zinc finger protein 689                                                                        | 0.7246 | 0.0408 |
| 227449_at   | EPHA4     | EPH receptor A4                                                                                | 1.3811 | 0.0334 |
| 227451_s_at | CCDC90A   | Coiled-coil domain containing 90A                                                              | 1.0172 | 0.0043 |

|             |               |                                                                                             |        |        |
|-------------|---------------|---------------------------------------------------------------------------------------------|--------|--------|
| 227455_at   | C6orf136      | chromosome 6 open reading frame 136                                                         | 0.7126 | 0.0139 |
| 227465_at   | KIAA0892      | KIAA0892                                                                                    | 0.451  | 0.0272 |
| 227485_at   | DDX26B        | DEAD/H (Asp-Glu-Ala-Asp/His) box polypeptide 26B                                            | 0.9671 | 0.0001 |
| 227488_at   | MGC16121      | hypothetical protein MGC16121                                                               | 3.168  | 0      |
| 227501_at   |               | Transcribed locus                                                                           | 1.3799 | 0.0087 |
| 227504_s_at |               | MRNA; cDNA DKFZp686F09227 (from clone DKFZp686F09227)                                       | 0.6312 | 0.0042 |
| 227505_at   |               | MRNA; cDNA DKFZp686F09227 (from clone DKFZp686F09227)                                       | 0.9582 | 0.0021 |
| 227508_at   |               | CDNA FLJ40982 fis; clone UTERU2014601                                                       | 0.5607 | 0.0213 |
| 227509_x_at |               | CDNA FLJ40982 fis; clone UTERU2014601                                                       | 0.5193 | 0.0129 |
| 227510_x_at | PRO1073       | PRO1073 protein                                                                             | 1.5037 | 0.0164 |
| 227511_at   | SAMD4B        | Sterile alpha motif domain containing 4B                                                    | 0.4972 | 0.0338 |
| 227518_at   | SLC35E1       | solute carrier family 35; member E1                                                         | 0.9145 | 0.0001 |
| 227525_at   | GLCCI1        | glucocorticoid induced transcript 1                                                         | 1.0131 | 0.0016 |
| 227527_at   | MLL2          | myeloid/lymphoid or mixed-lineage leukemia 2                                                | 0.5917 | 0.0009 |
| 227528_s_at | MLL2          | myeloid/lymphoid or mixed-lineage leukemia 2                                                | 0.5619 | 0.0016 |
| 227545_at   |               | Transcribed locus                                                                           | 1.8703 | 0      |
| 227551_at   | FAM108B1      | family with sequence similarity 108; member B1                                              | 0.5246 | 0.0131 |
| 227555_s_at | KHSRP         | KH-type splicing regulatory protein (FUSE binding protein 2)                                | 0.1839 | 0.0004 |
| 227578_at   |               | CDNA clone IMAGE:5266100                                                                    | 1.0397 | 0.0003 |
| 227580_s_at | DKFZP434B0335 | DKFZP434B0335 protein                                                                       | 0.3941 | 0.0256 |
| 227594_at   | ZMYM6         | zinc finger; MYM-type 6                                                                     | 0.9225 | 0.0055 |
| 227600_at   |               | Full-length cDNA clone CS0DK012YA15 of HeLa cells Cot 25-normalized of Homo sapiens (human) | 0.7032 | 0.0153 |
| 227618_at   |               | CDNA FLJ30378 fis; clone BRACE2007953                                                       | 1.2374 | 0.035  |
| 227628_at   | LOC493869     | similar to RIKEN cDNA 2310016C16                                                            | 3.2276 | 0      |
| 227632_at   | TBC1D24       | TBC1 domain family; member 24                                                               | 0.5303 | 0.0089 |
| 227637_at   | TFCP2         | Transcription factor CP2                                                                    | 0.7736 | 0.0039 |
| 227640_s_at | LOC441212     | retinitis pigmentosa 9 (autosomal dominant), retinitis pigmentosa 9 pseudogene              | 0.4913 | 0.0306 |
| 227641_at   | FBXL16        | F-box and leucine-rich repeat protein 16                                                    | 2.0999 | 0.0178 |
| 227647_at   | KCNE3         | potassium voltage-gated channel; Isk-related family; member 3                               | 1.5891 | 0.0041 |
| 227648_at   | C22orf32      | chromosome 22 open reading frame 32                                                         | 0.2263 | 0.0469 |
| 227651_at   | BTBD14B       | BTB (POZ) domain containing 14B                                                             | 0.6051 | 0.0072 |
| 227663_at   |               | CDNA FLJ40901 fis; clone UTERU2003704                                                       | 1.1035 | 0      |
| 227670_at   | ZNF75A        | zinc finger protein 75a                                                                     | 1.3766 | 0.0001 |

|             |           |                                                                                                  |        |        |
|-------------|-----------|--------------------------------------------------------------------------------------------------|--------|--------|
| 227671_at   | XIST      | X (inactive)-specific transcript                                                                 | 2.8202 | 0.042  |
| 227677_at   | JAK3      | Janus kinase 3 (a protein tyrosine kinase; leukocyte)                                            | 1.5745 | 0.0076 |
| 227678_at   | XRCC6BP1  | XRCC6 binding protein 1                                                                          | 1.2879 | 0.0043 |
| 227687_at   | HYLS1     | hydrolethalus syndrome 1                                                                         | 1.2166 | 0.0035 |
| 227689_at   | ZNF227    | zinc finger protein 227                                                                          | 1.2279 | 0.0009 |
| 227698_s_at | RAB40C    | RAB40C; member RAS oncogene family                                                               | 1.0539 | 0      |
| 227706_at   | SPIRE2    | spire homolog 2 (Drosophila)                                                                     | 0.2093 | 0.0498 |
| 227729_at   | ZNF134    | Zinc finger protein 134                                                                          | 0.7115 | 0.0045 |
| 227732_at   | ATXN7L1   | ataxin 7-like 1                                                                                  | 0.6888 | 0.0143 |
| 227733_at   | TMEM63C   | transmembrane protein 63C                                                                        | 1.4182 | 0.001  |
| 227741_at   | PTPLB     | protein tyrosine phosphatase-like (proline instead of catalytic arginine); member b              | 0.7996 | 0.0247 |
| 227746_at   | ELAVL1    | ELAV (embryonic lethal; abnormal vision; Drosophila)-like 1 (Hu antigen R)                       | 0.9662 | 0.0017 |
| 227747_at   | MPZL3     | myelin protein zero-like 3                                                                       | 0.2918 | 0.0024 |
| 227751_at   | PDCD5     | Programmed cell death 5                                                                          | 0.6785 | 0.0225 |
| 227754_at   |           | CDNA FLJ10417 fis; clone NT2RP1000112                                                            | 0.9001 | 0      |
| 227769_at   |           | Transcribed locus                                                                                | 2.1669 | 0.0064 |
| 227796_at   | LOC643836 | similar to Zinc finger protein 62 homolog (Zfp-62) (ZT3), zinc finger protein 62 homolog (mouse) | 1.3887 | 0.0001 |
| 227798_at   | SMAD1     | SMAD family member 1                                                                             | 0.6457 | 0.0145 |
| 227801_at   | TRIM59    | tripartite motif-containing 59                                                                   | 2.2493 | 0      |
| 227810_at   | ZNF558    | zinc finger protein 558                                                                          | 0.6126 | 0.0114 |
| 227815_at   |           | Transcribed locus                                                                                | 0.5809 | 0.044  |
| 227818_at   | CCDC21    | coiled-coil domain containing 21                                                                 | 1.4844 | 0.0001 |
| 227822_at   | ZNF605    | zinc finger protein 605                                                                          | 1.3719 | 0.001  |
| 227823_at   | RGAG4     | retrotransposon gag domain containing 4                                                          | 1.2235 | 0.0003 |
| 227825_at   | C9orf90   | chromosome 9 open reading frame 90                                                               | 0.2515 | 0.0267 |
| 227833_s_at | MBD6      | methyl-CpG binding domain protein 6                                                              | 1.1545 | 0.0015 |
| 227852_at   | RP9       | retinitis pigmentosa 9 (autosomal dominant)                                                      | 0.4896 | 0.0219 |
| 227861_at   | TMEM161B  | transmembrane protein 161B                                                                       | 0.8438 | 0.0004 |
| 227884_at   | TAF15     | TAF15 RNA polymerase II; TATA box binding protein (TBP)-associated factor; 68kDa                 | 1.5736 | 0.0008 |
| 227891_s_at | TAF15     | TAF15 RNA polymerase II; TATA box binding protein (TBP)-associated factor; 68kDa                 | 1.0628 | 0.0053 |
| 227896_at   | BCCIP     | BRCA2 and CDKN1A interacting protein                                                             | 1.4235 | 0.0006 |
| 227911_at   | ARHGAP28  | Rho GTPase activating protein 28                                                                 | 1.092  | 0.0346 |
| 227918_s_at | ZYG11B    | zyg-11 homolog B (C. elegans)                                                                    | 0.5834 | 0.0217 |
| 227921_at   |           |                                                                                                  | 3.1053 | 0      |

|             |           |                                                                          |        |        |
|-------------|-----------|--------------------------------------------------------------------------|--------|--------|
| 227922_x_at | LOC441124 | hypothetical gene supported by AK093729; BX647918                        | 0.498  | 0.005  |
| 227924_at   | FLJ20309  | hypothetical protein FLJ20309                                            | 0.2263 | 0.0471 |
| 227926_s_at | NBPF11    | neuroblastoma breakpoint family; member 11                               | 0.7744 | 0.0361 |
| 227927_at   |           | Clone HLS_IMAGE_594438 mRNA sequence                                     | 0.5704 | 0.0166 |
| 227928_at   | C12orf48  | chromosome 12 open reading frame 48                                      | 1.4841 | 0.0002 |
| 227936_at   | TMEM68    | transmembrane protein 68                                                 | 0.8231 | 0.0244 |
| 227937_at   | LOC339344 | hypothetical protein LOC339344                                           | 0.3178 | 0.0212 |
| 227940_at   | LOC339803 | Hypothetical protein LOC339803                                           | 0.9404 | 0.0017 |
| 227943_at   |           |                                                                          | 0.7211 | 0.0469 |
| 227946_at   | OSBPL7    | oxysterol binding protein-like 7                                         | 0.4233 | 0.0341 |
| 227951_s_at | FAM98C    | family with sequence similarity 98; member C                             | 0.5122 | 0.0208 |
| 227972_at   | TOR2A     | torsin family 2; member A                                                | 1.334  | 0.0013 |
| 227974_at   |           | Transcribed locus                                                        | 0.9785 | 0.0196 |
| 227975_at   | GPRIN1    | G protein regulated inducer of neurite outgrowth 1                       | 0.295  | 0.0329 |
| 227978_s_at | ZADH2     | zinc binding alcohol dehydrogenase; domain containing 2                  | 0.4319 | 0.0254 |
| 227980_at   | ZNF322A   | zinc finger protein 322A                                                 | 0.3544 | 0.0126 |
| 227982_at   |           | MRNA; cDNA DKFZp434B1417 (from clone DKFZp434B1417)                      | 0.6789 | 0.0012 |
| 227986_at   | ZNF343    | zinc finger protein 343                                                  | 0.4361 | 0.0302 |
| 227994_x_at | C20orf149 | chromosome 20 open reading frame 149                                     | 0.783  | 0.0036 |
| 227999_at   | PWWP2     | PWWP domain containing 2                                                 | 0.6581 | 0.0037 |
| 228010_at   | PPP2R2C   | protein phosphatase 2 (formerly 2A); regulatory subunit B; gamma isoform | 2.0088 | 0.0323 |
| 228013_at   |           | MRNA; cDNA DKFZp586F1523 (from clone DKFZp586F1523)                      | 0.7357 | 0.0141 |
| 228014_at   | PTRH1     | peptidyl-tRNA hydrolase 1 homolog (S. cerevisiae)                        | 0.9542 | 0.011  |
| 228026_at   | SIKE      | suppressor of IKK epsilon                                                | 0.531  | 0.0038 |
| 228029_at   | ZNF721    | zinc finger protein 721                                                  | 0.8105 | 0.0037 |
| 228033_at   | E2F7      | E2F transcription factor 7                                               | 0.8723 | 0.003  |
| 228047_at   | SNORA72   | small nucleolar RNA; H/ACA box 72                                        | 0.8366 | 0.0138 |
| 228050_at   | UTP15     | UTP15; U3 small nucleolar ribonucleoprotein; homolog (S. cerevisiae)     | 0.4323 | 0.0157 |
| 228057_at   | DDIT4L    | DNA-damage-inducible transcript 4-like                                   | 2.0934 | 0.0143 |
| 228058_at   | LOC124220 | similar to common salivary protein 1                                     | 1.8864 | 0.0119 |
| 228061_at   | CCDC126   | coiled-coil domain containing 126                                        | 1.0656 | 0.0084 |
| 228068_at   | C10orf132 | chromosome 10 open reading frame 132                                     | 0.6197 | 0.0081 |
| 228069_at   | FAM54A    | family with sequence similarity 54; member A                             | 2.4388 | 0.0001 |
| 228073_at   | NANP      | N-acetylneuraminic acid phosphatase                                      | 0.4546 | 0.0264 |



|             |           |                                                                                                |        |        |
|-------------|-----------|------------------------------------------------------------------------------------------------|--------|--------|
| 228080_at   | LAYN      | layilin                                                                                        | 0.8726 | 0.0151 |
| 228087_at   | CCDC126   | coiled-coil domain containing 126                                                              | 0.6988 | 0.0212 |
| 228091_at   |           | Full-length cDNA clone CS0DB009YL20 of Neuroblastoma Cot 10-normalized of Homo sapiens (human) | 0.6024 | 0.0429 |
| 228099_at   | ZNF550    | zinc finger protein 550                                                                        | 1.6716 | 0      |
| 228106_at   | C4orf30   | chromosome 4 open reading frame 30                                                             | 0.4693 | 0.0239 |
| 228116_at   |           | Clone IMAGE:120162 mRNA sequence                                                               | 2.2255 | 0.0003 |
| 228122_at   | CCDC66    | coiled-coil domain containing 66                                                               | 0.7606 | 0.0136 |
| 228123_s_at | ABHD12    | abhydrolase domain containing 12                                                               | 0.5665 | 0.0195 |
| 228138_at   | ZNF498    | zinc finger protein 498                                                                        | 0.4964 | 0.0023 |
| 228141_at   | LOC493869 | Similar to RIKEN cDNA 2310016C16                                                               | 3.0956 | 0      |
| 228144_at   | ZNF300    | zinc finger protein 300                                                                        | 1.3344 | 0.0004 |
| 228145_s_at | ZNF398    | zinc finger protein 398                                                                        | 0.8688 | 0.005  |
| 228149_at   | FLJ31818  | hypothetical protein FLJ31818                                                                  | 1.0406 | 0      |
| 228154_at   | C19orf44  | chromosome 19 open reading frame 44                                                            | 0.202  | 0.0216 |
| 228156_at   |           | Homo sapiens; clone IMAGE:4346533; mRNA                                                        | 1.4859 | 0.0002 |
| 228160_at   | LOC400642 | hypothetical gene supported by BC041875; BX648984                                              | 0.4724 | 0.0281 |
| 228168_at   | ATP5G3    | ATP synthase; H+ transporting; mitochondrial F0 complex; subunit C3 (subunit 9)                | 0.5922 | 0.0183 |
| 228171_s_at | PLEKHG4   | pleckstrin homology domain containing; family G (with RhoGef domain) member 4                  | 2.3704 | 0.0002 |
| 228175_at   |           | CDNA FLJ31660 fis; clone NT2RI2004410                                                          | 0.6395 | 0.0342 |
| 228189_at   | BAG4      | BCL2-associated athanogene 4                                                                   | 0.5596 | 0.0004 |
| 228191_at   | FLVCR1    | feline leukemia virus subgroup C cellular receptor 1                                           | 0.959  | 0.0291 |
| 228198_s_at | FAHD2B    | Fumarylacetoacetate hydrolase domain containing 2B                                             | 0.59   | 0.0007 |
| 228199_at   | FAHD2B    | Fumarylacetoacetate hydrolase domain containing 2B                                             | 0.1936 | 0.0457 |
| 228226_s_at | ZNF775    | zinc finger protein 775                                                                        | 0.2111 | 0.0244 |
| 228229_at   | ZNF526    | zinc finger protein 526                                                                        | 0.2824 | 0.0155 |
| 228235_at   | MGC16121  | hypothetical protein MGC16121                                                                  | 3.3307 | 0      |
| 228240_at   |           | Full-length cDNA clone CS0DM002YA18 of Fetal liver of Homo sapiens (human)                     | 0.6002 | 0.0448 |
| 228242_at   |           |                                                                                                | 0.8309 | 0.0139 |
| 228244_at   |           | CDNA clone IMAGE:5736961                                                                       | 0.7659 | 0.0006 |
| 228245_s_at | LOC728715 | ovostatin 2, similar to cDNA sequence BC048546                                                 | 1.5464 | 0.0032 |
| 228250_at   | FNIP1     | folliculin interacting protein 1                                                               | 1.376  | 0.0002 |
| 228253_at   | LOXL3     | lysyl oxidase-like 3                                                                           | 1.1256 | 0.0281 |
| 228257_at   | ANKRD52   | ankyrin repeat domain 52                                                                       | 0.7708 | 0.0022 |

|             |          |                                                                            |        |        |
|-------------|----------|----------------------------------------------------------------------------|--------|--------|
| 228260_at   | ELAVL2   | ELAV (embryonic lethal; abnormal vision; Drosophila)-like 2 (Hu antigen B) | 1.4591 | 0.0119 |
| 228262_at   | MAP7D2   | MAP7 domain containing 2                                                   | 1.5707 | 0.022  |
| 228269_x_at | KCNIP3   | Kv channel interacting protein 3; calsenilin                               | 0.7618 | 0.0051 |
| 228273_at   |          | Transcribed locus                                                          | 3.4724 | 0      |
| 228280_at   | ZC3HAV1L | zinc finger CCCH-type; antiviral 1-like                                    | 0.8528 | 0.0406 |
| 228281_at   | C11orf82 | chromosome 11 open reading frame 82                                        | 1.2014 | 0.003  |
| 228286_at   | FLJ40869 | hypothetical protein FLJ40869                                              | 1.107  | 0.0027 |
| 228290_at   |          |                                                                            | 0.8622 | 0.0004 |
| 228291_s_at | C20orf19 | chromosome 20 open reading frame 19                                        | 0.4076 | 0.0413 |
| 228295_at   | WDR59    | WD repeat domain 59                                                        | 0.2691 | 0.0303 |
| 228305_at   | ZNF565   | zinc finger protein 565                                                    | 0.548  | 0.0432 |
| 228308_at   | FKBP11   | FK506 binding protein 11; 19 kDa                                           | 0.6846 | 0.0043 |
| 228318_s_at | CRIPAK   | cysteine-rich PAK1 inhibitor                                               | 0.8868 | 0.0269 |
| 228320_x_at | CCDC64   | coiled-coil domain containing 64                                           | 0.926  | 0.013  |
| 228323_at   | CASC5    | cancer susceptibility candidate 5                                          | 2.1756 | 0.0002 |
| 228324_at   | C9orf41  | chromosome 9 open reading frame 41                                         | 0.6572 | 0.027  |
| 228328_at   | KLHL28   | kelch-like 28 (Drosophila)                                                 | 0.6195 | 0.0185 |
| 228334_x_at | KIAA1712 | KIAA1712                                                                   | 0.8977 | 0.0008 |
| 228336_at   | MST101   | MSTP101                                                                    | 0.776  | 0.0032 |
| 228337_at   | MST101   | MSTP101                                                                    | 0.88   | 0.0003 |
| 228346_at   |          | Transcribed locus                                                          | 1.0392 | 0.0409 |
| 228348_at   | LINS1    | lines homolog 1 (Drosophila)                                               | 0.5785 | 0.0312 |
| 228354_at   | C10orf83 | chromosome 10 open reading frame 83                                        | 0.5626 | 0.0044 |
| 228357_at   | UNK      | unkempt homolog (Drosophila)                                               | 0.8083 | 0.0158 |
| 228358_at   | SOX12    | SRX (sex determining region Y)-box 12                                      | 0.1735 | 0.0232 |
| 228361_at   | E2F2     | E2F transcription factor 2                                                 | 0.5155 | 0.0294 |
| 228374_at   | C10orf28 | chromosome 10 open reading frame 28                                        | 0.4253 | 0.0011 |
| 228382_at   | FAM105B  | family with sequence similarity 105; member B                              | 0.2277 | 0.038  |
| 228392_at   | ZNF302   | zinc finger protein 302                                                    | 1.8879 | 0      |
| 228393_s_at | ZNF302   | zinc finger protein 302                                                    | 1.7323 | 0.0001 |
| 228401_at   | ATAD2    | ATPase family; AAA domain containing 2                                     | 1.3772 | 0.0001 |
| 228415_at   |          |                                                                            | 1.3404 | 0.0158 |
| 228426_at   | CLEC2D   | C-type lectin domain family 2; member D                                    | 0.1781 | 0.0393 |
| 228427_at   | FBXO16   | F-box protein 16                                                           | 0.6243 | 0.0149 |
| 228437_at   | CNIH4    | cornichon homolog 4 (Drosophila)                                           | 0.555  | 0.029  |
| 228443_s_at |          |                                                                            | 0.5068 | 0.0389 |

|             |           |                                                                                                                                    |        |        |
|-------------|-----------|------------------------------------------------------------------------------------------------------------------------------------|--------|--------|
| 228450_at   | PLEKHA7   | pleckstrin homology domain containing; family A member 7                                                                           | 0.5057 | 0.0093 |
| 228454_at   | LCOR      | ligand dependent nuclear receptor corepressor                                                                                      | 1.0314 | 0.0042 |
| 228455_at   | RBM15     | RNA binding motif protein 15                                                                                                       | 1.1467 | 0.017  |
| 228464_at   |           | Full-length cDNA clone CS0DF007YJ21 of Fetal brain of Homo sapiens (human)                                                         | 0.8805 | 0.0038 |
| 228468_at   | MASTL     | microtubule associated serine/threonine kinase-like                                                                                | 1.1793 | 0.0056 |
| 228476_at   | KIAA1407  | KIAA1407                                                                                                                           | 0.5723 | 0.0032 |
| 228483_s_at | TAF9B     | TAF9B RNA polymerase II; TATA box binding protein (TBP)-associated factor; 31kDa                                                   | 1.7823 | 0.003  |
| 228493_at   |           | Transcribed locus                                                                                                                  | 0.955  | 0.0031 |
| 228495_at   | CCDC75    | coiled-coil domain containing 75                                                                                                   | 0.5575 | 0.013  |
| 228499_at   | PFKFB4    | 6-phosphofructo-2-kinase/fructose-2,6-biphosphatase 4                                                                              | 2.4497 | 0.002  |
| 228500_at   | THAP8     | THAP domain containing 8                                                                                                           | 0.6487 | 0.0019 |
| 228513_at   | LOC124446 | hypothetical protein BC017488                                                                                                      | 0.6821 | 0.0003 |
| 228516_at   | CDAN1     | congenital dyserythropoietic anemia; type I                                                                                        | 1.0156 | 0.002  |
| 228519_x_at | CIRBP     | cold inducible RNA binding protein                                                                                                 | 0.4964 | 0.0089 |
| 228522_at   | LOC642031 | hypothetical protein LOC642031                                                                                                     | 0.3408 | 0.0067 |
| 228529_at   |           | Transcribed locus                                                                                                                  | 1.5877 | 0      |
| 228537_at   | GLI2      | GLI-Kruppel family member GLI2                                                                                                     | 0.4704 | 0.0271 |
| 228539_at   |           | Transcribed locus                                                                                                                  | 0.709  | 0.0055 |
| 228545_at   | ZNF148    | zinc finger protein 148                                                                                                            | 0.5058 | 0.0326 |
| 228563_at   | GJA7      | gap junction protein; alpha 7; 45kDa                                                                                               | 0.4253 | 0.008  |
| 228570_at   | BTBD11    | BTB (POZ) domain containing 11                                                                                                     | 1.561  | 0.0368 |
| 228571_at   | RBAK      | RB-associated KRAB zinc finger                                                                                                     | 0.6967 | 0.0001 |
| 228578_at   | RBM45     | RNA binding motif protein 45                                                                                                       | 0.3727 | 0.0486 |
| 228597_at   | C21orf45  | chromosome 21 open reading frame 45                                                                                                | 1.1642 | 0.001  |
| 228613_at   | RAB11FIP3 | RAB11 family interacting protein 3 (class II)                                                                                      | 0.9692 | 0.018  |
| 228619_x_at | TIPRL     | TIP41; TOR signaling pathway regulator-like (S. cerevisiae)                                                                        | 0.595  | 0.0079 |
| 228620_at   |           | CDNA FLJ46701 fis; clone TRACH3014063                                                                                              | 0.7871 | 0.0026 |
| 228626_at   |           | Transcribed locus                                                                                                                  | 0.2853 | 0.0269 |
| 228630_at   | ZNF84     | Zinc finger protein 84                                                                                                             | 0.8711 | 0.0255 |
| 228639_at   |           | Transcribed locus; moderately similar to XP_001372598.1 similar to FYVE; RhoGEF and PH domain containing 1 [Monodelphis domestica] | 0.8738 | 0.0469 |
| 228654_at   | SPIN4     | spindlin family; member 4                                                                                                          | 1.8451 | 0      |
| 228660_x_at | SEMA4F    | sema domain; immunoglobulin domain (Ig); transmembrane domain (TM) and short cytoplasmic domain; (semaphorin) 4F                   | 0.3592 | 0.0307 |
| 228663_x_at | FIZ1      | FLT3-interacting zinc finger 1                                                                                                     | 0.1421 | 0.049  |

|             |          |                                                                                               |        |        |
|-------------|----------|-----------------------------------------------------------------------------------------------|--------|--------|
| 228667_at   | AGPAT4   | 1-acylglycerol-3-phosphate O-acyltransferase 4 (lysophosphatidic acid acyltransferase; delta) | 0.4635 | 0.0203 |
| 228680_at   | KIF3A    | kinesin family member 3A                                                                      | 1.5511 | 0      |
| 228711_at   | ZNF37A   | zinc finger protein 37A                                                                       | 0.9276 | 0      |
| 228714_at   |          | CDNA FLJ46701 fis; clone TRACH3014063                                                         | 0.4452 | 0.0249 |
| 228723_at   |          | CDNA FLJ30445 fis; clone BRACE2009238                                                         | 0.6514 | 0.032  |
| 228725_x_at | PRMT2    | protein arginine methyltransferase 2                                                          | 0.9273 | 0.0073 |
| 228729_at   | CCNB1    | cyclin B1                                                                                     | 3.2148 | 0      |
| 228734_at   |          | CDNA FLJ41934 fis; clone PERIC2005111                                                         | 0.7274 | 0.0094 |
| 228741_s_at | HCN3     | hyperpolarization activated cyclic nucleotide-gated potassium channel 3                       | 0.6699 | 0.0035 |
| 228745_at   | SGTB     | small glutamine-rich tetratricopeptide repeat (TPR)-containing; beta                          | 0.9482 | 0.0082 |
| 228747_at   | SEC61A2  | Sec61 alpha 2 subunit ( <i>S. cerevisiae</i> )                                                | 0.483  | 0.0112 |
| 228748_at   | CD59     | CD59 molecule; complement regulatory protein                                                  | 1.2715 | 0.0158 |
| 228751_at   | CLK4     | CDC-like kinase 4                                                                             | 0.6599 | 0.034  |
| 228755_at   | PERQ1    | PERQ amino acid rich; with GYF domain 1                                                       | 0.3414 | 0.0024 |
| 228766_at   | CD36     | CD36 molecule (thrombospondin receptor)                                                       | 2.386  | 0.0007 |
| 228768_at   | FNIP1    | folliculin interacting protein 1                                                              | 0.352  | 0.0269 |
| 228774_at   | CEP78    | centrosomal protein 78kDa                                                                     | 0.8623 | 0.0041 |
| 228776_at   | GJA7     | gap junction protein; alpha 7; 45kDa                                                          | 3.3547 | 0      |
| 228801_at   | ORMDL1   | ORM1-like 1 ( <i>S. cerevisiae</i> )                                                          | 0.8317 | 0.0002 |
| 228816_at   | LOC92270 | hypothetical protein LOC92270                                                                 | 0.7151 | 0.0334 |
| 228835_at   |          | CDNA FLJ33090 fis; clone TRACH2000559                                                         | 0.7062 | 0.0147 |
| 228841_at   | LYRM7    | Lym7 homolog (mouse)                                                                          | 0.6056 | 0.0066 |
| 228856_at   |          | Transcribed locus                                                                             | 0.7075 | 0.0123 |
| 228859_at   | LOC91431 | prematurely terminated mRNA decay factor-like                                                 | 0.9771 | 0.0005 |
| 228864_at   | ZNF653   | zinc finger protein 653                                                                       | 0.7219 | 0.0097 |
| 228868_x_at | CDT1     | Chromatin licensing and DNA replication factor 1                                              | 1.9491 | 0.0008 |
| 228899_at   | CUL1     | Cullin 1                                                                                      | 1.1935 | 0.0001 |
| 228906_at   | CXXC6    | CXXC finger 6                                                                                 | 1.1487 | 0.0097 |
| 228907_at   |          | Transcribed locus                                                                             | 0.7269 | 0.0039 |
| 228910_at   |          | Transcribed locus                                                                             | 0.5001 | 0.0266 |
| 228911_at   | ADAMTS7  | ADAM metalloproteinase with thrombospondin type 1 motif; 7                                    | 0.5263 | 0.0013 |
| 228914_at   |          |                                                                                               | 0.9458 | 0.005  |
| 228919_at   |          |                                                                                               | 2.1503 | 0.0063 |
| 228920_at   | ZNF260   | zinc finger protein 260                                                                       | 1.1977 | 0.0002 |

|             |           |                                                                                                                               |        |        |
|-------------|-----------|-------------------------------------------------------------------------------------------------------------------------------|--------|--------|
| 228925_at   |           | Transcribed locus; weakly similar to XP_001114229.1 similar to ADAM metallopeptidase domain 30 preproprotein [Macaca mulatta] | 1.0361 | 0.0004 |
| 228927_at   | ZNF397    | zinc finger protein 397                                                                                                       | 0.8934 | 0.0024 |
| 228929_at   | DNASE1    | deoxyribonuclease I                                                                                                           | 0.3657 | 0.0063 |
| 228931_at   | COQ4      | coenzyme Q4 homolog (S. cerevisiae)                                                                                           | 0.8571 | 0.0263 |
| 228935_at   | SLC4A8    | solute carrier family 4; sodium bicarbonate cotransporter; member 8                                                           | 1.3193 | 0.0044 |
| 228946_at   | INTU      | inturned planar cell polarity effector homolog (Drosophila)                                                                   | 0.9427 | 0.0036 |
| 228951_at   |           | Transcribed locus                                                                                                             | 0.8456 | 0.002  |
| 228958_at   | ZNF19     | zinc finger protein 19                                                                                                        | 0.2505 | 0.0271 |
| 228959_at   |           | CDNA clone IMAGE:5262734                                                                                                      | 1.2645 | 0.0042 |
| 228961_at   | MIER3     | mesoderm induction early response 1; family member 3                                                                          | 0.3549 | 0.0209 |
| 228962_at   |           | Transcribed locus                                                                                                             | 0.6762 | 0.0319 |
| 228968_at   | ZNF449    | zinc finger protein 449                                                                                                       | 0.5409 | 0.0057 |
| 228982_s_at | USP42     | Ubiquitin specific peptidase 42                                                                                               | 0.1225 | 0.003  |
| 228986_at   | OSBPL8    | oxysterol binding protein-like 8                                                                                              | 0.9246 | 0.0074 |
| 228991_at   |           | CDNA FLJ27143 fis; clone SPL09242                                                                                             | 0.7553 | 0.0002 |
| 228992_at   | MED28     | Mediator of RNA polymerase II transcription; subunit 28 homolog (S. cerevisiae)                                               | 0.5005 | 0.0217 |
| 228993_s_at | LOC92482  | hypothetical protein LOC92482                                                                                                 | 1.0867 | 0      |
| 228999_at   | CHD2      | chromodomain helicase DNA binding protein 2                                                                                   | 0.632  | 0.024  |
| 229000_at   | ZNF77     | zinc finger protein 77                                                                                                        | 0.7771 | 0.0012 |
| 229001_at   | PPP1R3E   | Protein phosphatase 1; regulatory (inhibitor) subunit 3E                                                                      | 1.1414 | 0.0031 |
| 229009_at   | SIX5      | SIX homeobox 5                                                                                                                | 0.6666 | 0.0089 |
| 229022_at   | ZFX       | zinc finger protein; X-linked                                                                                                 | 0.542  | 0.0405 |
| 229027_at   |           | Transcribed locus                                                                                                             | 0.7834 | 0.0027 |
| 229033_s_at | MUM1      | melanoma associated antigen (mutated) 1                                                                                       | 0.8225 | 0.001  |
| 229038_at   | CWF19L1   | CWF19-like 1; cell cycle control (S. pombe)                                                                                   | 0.4843 | 0.0025 |
| 229043_at   | PAPD5     | PAP associated domain containing 5                                                                                            | 0.7307 | 0.0028 |
| 229050_s_at | SNHG7     | small nucleolar RNA host gene (non-protein coding) 7                                                                          | 0.8981 | 0.0047 |
| 229052_at   | ANKRD23   | ankyrin repeat domain 23, ankyrin repeat domain 39                                                                            | 0.3162 | 0.0141 |
| 229061_s_at | SLC25A13  | solute carrier family 25; member 13 (citrin)                                                                                  | 1.3863 | 0.0002 |
| 229075_at   |           | Transcribed locus                                                                                                             | 0.6574 | 0.0002 |
| 229081_at   | SLC25A13  | Solute carrier family 25; member 13 (citrin)                                                                                  | 0.2091 | 0.0267 |
| 229082_at   | CCDC125   | coiled-coil domain containing 125                                                                                             | 0.4152 | 0.0006 |
| 229090_at   | LOC220930 | hypothetical protein LOC220930                                                                                                | 1.2445 | 0.0001 |
| 229097_at   | DIAPH3    | diaphanous homolog 3 (Drosophila)                                                                                             | 2.0076 | 0.0001 |

|             |           |                                                                            |        |        |
|-------------|-----------|----------------------------------------------------------------------------|--------|--------|
| 229123_at   | ZNF225    | Zinc finger protein 225                                                    | 0.8768 | 0.0012 |
| 229126_at   | TMEM19    | transmembrane protein 19                                                   | 1.2535 | 0.0001 |
| 229129_at   |           | Transcribed locus                                                          | 1.2472 | 0.0013 |
| 229133_s_at | ZNF397    | zinc finger protein 397                                                    | 0.2168 | 0.0425 |
| 229139_at   | JPH1      | junctophilin 1                                                             | 1.0601 | 0.0348 |
| 229140_at   | ZNF579    | zinc finger protein 579                                                    | 0.4416 | 0.0067 |
| 229143_at   | CNOT3     | CCR4-NOT transcription complex; subunit 3                                  | 0.6706 | 0.0259 |
| 229159_at   | THSD7A    | Thrombospondin; type I; domain containing 7A                               | 0.7303 | 0.0368 |
| 229173_at   | KIAA1715  | KIAA1715                                                                   | 0.9193 | 0.0055 |
| 229181_s_at | CEP27     | centrosomal protein 27kDa                                                  | 0.5475 | 0.0263 |
| 229206_at   |           | CDNA FLJ13350 fis; clone OVARC1002143                                      | 0.9604 | 0.0007 |
| 229220_x_at | NOM1      | nucleolar protein with MIF4G domain 1                                      | 0.4022 | 0.0021 |
| 229224_x_at | LOC643085 | hypothetical LOC643085                                                     | 0.2155 | 0.0128 |
| 229227_at   | FLJ45244  | hypothetical locus FLJ45244                                                | 0.3086 | 0.0354 |
| 229228_at   | CREB5     | cAMP responsive element binding protein 5                                  | 1.007  | 0.0097 |
| 229231_at   | LRRC37B   | leucine rich repeat containing 37B                                         | 0.7963 | 0.0027 |
| 229243_at   |           | Transcribed locus                                                          | 0.6573 | 0.0002 |
| 229254_at   | MFSD4     | major facilitator superfamily domain containing 4                          | 0.534  | 0.0009 |
| 229256_at   | PGM2L1    | phosphoglucomutase 2-like 1                                                | 1.2926 | 0.0194 |
| 229261_at   |           | Transcribed locus                                                          | 0.5283 | 0.0178 |
| 229268_at   | FAM105B   | family with sequence similarity 105; member B                              | 1.318  | 0.0006 |
| 229271_x_at | COL11A1   | collagen; type XI; alpha 1                                                 | 1.3434 | 0.0315 |
| 229297_at   |           | Full-length cDNA clone CS0CAP006YP08 of Thymus of Homo sapiens (human)     | 0.5766 | 0.0178 |
| 229300_at   |           | CDNA FLJ37366 fis; clone BRAMY2024416                                      | 0.9059 | 0.0422 |
| 229304_s_at | MLF1IP    | MLF1 interacting protein                                                   | 0.8684 | 0.003  |
| 229305_at   | MLF1IP    | MLF1 interacting protein                                                   | 1.107  | 0.0061 |
| 229315_at   |           | Transcribed locus                                                          | 0.6969 | 0.0137 |
| 229328_at   | ZNF540    | Zinc finger protein 540                                                    | 0.6168 | 0.021  |
| 229336_at   | ST3GAL2   | ST3 beta-galactoside alpha-2;3-sialyltransferase 2                         | 0.4795 | 0.0151 |
| 229351_at   |           | Chromosome 6 isolate HA_003120 mRNA sequence                               | 0.7336 | 0.0005 |
| 229353_s_at | NUCKS1    | nuclear casein kinase and cyclin-dependent kinase substrate 1              | 0.4973 | 0.0168 |
| 229354_at   | AHRR      | aryl-hydrocarbon receptor repressor                                        | 1.1966 | 0.0235 |
| 229357_at   | ADAMTS5   | ADAM metalloproteinase with thrombospondin type 1 motif, 5 (aggrecanase-2) | 0.9761 | 0.0378 |
| 229360_at   | SUHW2     | suppressor of hairy wing homolog 2 (Drosophila)                            | 2.1769 | 0      |
| 229370_at   |           | Transcribed locus                                                          | 0.6928 | 0.0404 |
| 229388_at   |           | CDNA clone IMAGE:5295564                                                   | 0.963  | 0.0004 |

|             |           |                                                     |        |        |
|-------------|-----------|-----------------------------------------------------|--------|--------|
| 229394_s_at | GRLF1     | glucocorticoid receptor DNA binding factor 1        | 0.6831 | 0.0054 |
| 229398_at   | RAB18     | RAB18; member RAS oncogene family                   | 0.8699 | 0.0161 |
| 229399_at   | C10orf118 | chromosome 10 open reading frame 118                | 1.0371 | 0.0027 |
| 229400_at   | HOXD10    | homeobox D10                                        | 2.1986 | 0.0009 |
| 229410_at   |           | MRNA; cDNA DKFZp564G0462 (from clone DKFZp564G0462) | 0.7685 | 0.0056 |
| 229418_at   | C17orf63  | chromosome 17 open reading frame 63                 | 0.5603 | 0.0035 |
| 229425_at   |           | Transcribed locus                                   | 0.339  | 0.0061 |
| 229434_at   |           | Transcribed locus                                   | 0.5755 | 0.0328 |
| 229442_at   | C18orf54  | chromosome 18 open reading frame 54                 | 1.232  | 0.001  |
| 229455_at   |           | Full length insert cDNA clone YZ04E02               | 0.753  | 0.0257 |
| 229457_at   | ANKHD1    | ankyrin repeat and KH domain containing 1           | 1.0194 | 0.0003 |
| 229467_at   | PCBP2     | Poly(rC) binding protein 2                          | 1.273  | 0.0005 |
| 229470_at   | FAM105B   | Family with sequence similarity 105; member B       | 0.7636 | 0.0005 |
| 229473_at   | MAMDC4    | MAM domain containing 4                             | 0.8891 | 0.001  |
| 229483_at   |           | CDNA FLJ42331 fis; clone TSTOM2000588               | 1.8905 | 0.0002 |
| 229490_s_at |           | Transcribed locus                                   | 1.4311 | 0.001  |
| 229504_at   |           | Transcribed locus                                   | 0.9835 | 0.0076 |
| 229513_at   | STRBP     | Spermatid perinuclear RNA binding protein           | 0.6739 | 0.0046 |
| 229514_at   | C14orf118 | chromosome 14 open reading frame 118                | 0.6104 | 0.0359 |
| 229532_at   | ZNF502    | zinc finger protein 502                             | 0.5362 | 0.0049 |
| 229538_s_at | IQGAP3    | IQ motif containing GTPase activating protein 3     | 1.0429 | 0.0003 |
| 229539_at   |           | Full length insert cDNA clone ZD70D07               | 0.5853 | 0.0046 |
| 229546_at   | LOC653602 | hypothetical LOC653602                              | 0.6278 | 0.0345 |
| 229551_x_at | ZNF367    | zinc finger protein 367                             | 3.1438 | 0      |
| 229553_at   | PGM2L1    | phosphoglucomutase 2-like 1                         | 1.5634 | 0.0072 |
| 229558_at   |           | Transcribed locus                                   | 0.3777 | 0.002  |
| 229567_at   | LOC161247 | similar to CG10671-like                             | 1.1536 | 0.0494 |
| 229571_at   |           | Transcribed locus                                   | 0.1566 | 0.0481 |
| 229586_at   | CHD9      | chromodomain helicase DNA binding protein 9         | 1.0255 | 0.002  |
| 229603_at   | BBS12     | Bardet-Biedl syndrome 12                            | 0.8118 | 0.0082 |
| 229610_at   | CKAP2L    | cytoskeleton associated protein 2-like              | 1.0154 | 0.0022 |
| 229611_at   | LMLN      | leishmanolysin-like (metallopeptidase M8 family)    | 0.1893 | 0.0451 |
| 229614_at   | ZNF320    | zinc finger protein 320                             | 1.012  | 0.01   |
| 229615_at   |           | Transcribed locus                                   | 0.8726 | 0.0025 |
| 229618_at   | SNX16     | sorting nexin 16                                    | 1.0982 | 0.0013 |
| 229622_at   | FAM132B   | family with sequence similarity 132; member B       | 0.1844 | 0.0305 |

|             |           |                                                                        |        |        |
|-------------|-----------|------------------------------------------------------------------------|--------|--------|
| 229633_at   | INTS10    | Integrator complex subunit 10                                          | 0.5153 | 0.0189 |
| 229656_s_at | FLJ42562  | similar to echinoderm microtubule associated protein like 5            | 1.8072 | 0.0123 |
| 229660_at   | C16orf55  | chromosome 16 open reading frame 55                                    | 0.1654 | 0.0106 |
| 229671_s_at | C21orf45  | Chromosome 21 open reading frame 45                                    | 0.3125 | 0.0391 |
| 229672_at   | C20orf44  | Chromosome 20 open reading frame 44                                    | 0.7822 | 0.0252 |
| 229673_at   |           | Full-length cDNA clone CS0CAP006YP08 of Thymus of Homo sapiens (human) | 0.5092 | 0.003  |
| 229700_at   | ZNF738    | zinc finger protein 738                                                | 1.6919 | 0.016  |
| 229701_at   | DNAJC9    | DnaJ (Hsp40) homolog; subfamily C; member 9                            | 0.2975 | 0.0039 |
| 229706_at   | TCERG1    | transcription elongation regulator 1                                   | 0.6594 | 0.0182 |
| 229712_at   | SNAPC3    | small nuclear RNA activating complex; polypeptide 3; 50kDa             | 0.5576 | 0.0305 |
| 229751_s_at | PUS7L     | pseudouridylylase 7 homolog (S. cerevisiae)-like                       | 0.7102 | 0.0022 |
| 229758_at   | TIGD5     | tigger transposable element derived 5                                  | 0.3912 | 0.0385 |
| 229784_at   | MGC16121  | Hypothetical protein MGC16121                                          | 2.0049 | 0      |
| 229785_at   | KRIT1     | KRIT1; ankyrin repeat containing                                       | 0.7158 | 0.007  |
| 229794_at   | ZNF585A   | zinc finger protein 585A                                               | 0.8386 | 0.0024 |
| 229795_at   |           | Transcribed locus                                                      | 0.7343 | 0.0026 |
| 229800_at   | DCLK1     | Doublecortin-like kinase 1                                             | 0.7787 | 0.0137 |
| 229815_at   |           | CDNA clone IMAGE:4814828                                               | 0.7465 | 0.0496 |
| 229829_at   | C18orf18  | chromosome 18 open reading frame 18                                    | 0.4423 | 0.0221 |
| 229855_at   | RNF34     | ring finger protein 34                                                 | 0.2381 | 0.0046 |
| 229859_at   |           | MRNA; cDNA DKFZp434E0516 (from clone DKFZp434E0516)                    | 0.2111 | 0.0318 |
| 229869_at   |           | Transcribed locus                                                      | 0.9784 | 0.0054 |
| 229878_at   | KIAA1731  | KIAA1731                                                               | 0.4099 | 0.0241 |
| 229879_at   |           | Transcribed locus                                                      | 1.5696 | 0.0065 |
| 229882_at   | RPS15A    | ribosomal protein S15a                                                 | 0.4    | 0.0097 |
| 229886_at   | C5orf34   | chromosome 5 open reading frame 34                                     | 2.4847 | 0      |
| 229897_at   | ZNF641    | Zinc finger protein 641                                                | 1.1027 | 0.005  |
| 229899_s_at | C20orf199 | chromosome 20 open reading frame 199                                   | 1.1429 | 0.0006 |
| 229908_s_at | C16orf28  | chromosome 16 open reading frame 28                                    | 0.5923 | 0.018  |
| 229949_at   |           | Transcribed locus                                                      | 1.3598 | 0      |
| 229953_x_at | LCA5      | Leber congenital amaurosis 5                                           | 0.2842 | 0.038  |
| 229962_at   | LRRC37A3  | leucine rich repeat containing 37; member A3                           | 0.7798 | 0.0022 |
| 229983_at   | TIGD2     | tigger transposable element derived 2                                  | 1.1723 | 0.0012 |
| 230002_at   | CLCC1     | Chloride channel CLIC-like 1                                           | 1.1498 | 0.0081 |
| 230008_at   | THSD7A    | thrombospondin; type I; domain containing 7A                           | 1.3688 | 0.0123 |



|             |           |                                                                                                                                  |        |        |
|-------------|-----------|----------------------------------------------------------------------------------------------------------------------------------|--------|--------|
| 230020_at   |           | Transcribed locus                                                                                                                | 0.4883 | 0.006  |
| 230021_at   | C15orf42  | chromosome 15 open reading frame 42                                                                                              | 0.43   | 0.0076 |
| 230028_at   | KIAA0907  | KIAA0907                                                                                                                         | 0.4801 | 0.0274 |
| 230047_at   | FLJ32810  | hypothetical protein FLJ32810                                                                                                    | 0.7181 | 0.0222 |
| 230058_at   | SDCCAG3   | serologically defined colon cancer antigen 3                                                                                     | 0.5765 | 0.0043 |
| 230063_at   | ZNF264    | zinc finger protein 264                                                                                                          | 0.708  | 0.0144 |
| 230064_at   |           | Transcribed locus                                                                                                                | 0.763  | 0.012  |
| 230069_at   | SFXN1     | sideroflexin 1                                                                                                                   | 1.4527 | 0.0011 |
| 230075_at   | RAB39B    | RAB39B; member RAS oncogene family                                                                                               | 0.7703 | 0.0392 |
| 230078_at   | RAPGEF6   | Rap guanine nucleotide exchange factor (GEF) 6                                                                                   | 0.3955 | 0.0229 |
| 230085_at   |           | Transcribed locus                                                                                                                | 1.3884 | 0.0042 |
| 230091_at   |           | Transcribed locus                                                                                                                | 0.9694 | 0.0001 |
| 230097_at   | GART      | Phosphoribosylglycinamide formyltransferase;<br>phosphoribosylglycinamide synthetase;<br>phosphoribosylaminoimidazole synthetase | 1.2017 | 0.0117 |
| 230106_at   | ZXDC      | ZXD family zinc finger C                                                                                                         | 0.5351 | 0.0007 |
| 230108_at   | ERCC6     | excision repair cross-complementing rodent repair<br>deficiency; complementation group 6                                         | 0.2326 | 0.0148 |
| 230141_at   | ARID4A    | AT rich interactive domain 4A (RBP1-like)                                                                                        | 0.83   | 0.0021 |
| 230142_s_at | CIRBP     | cold inducible RNA binding protein                                                                                               | 1.1213 | 0.0169 |
| 230151_at   | C13orf1   | chromosome 13 open reading frame 1                                                                                               | 0.6226 | 0.0293 |
| 230165_at   | SGOL2     | shugoshin-like 2 (S. pombe)                                                                                                      | 2.0353 | 0.0004 |
| 230168_at   |           | Transcribed locus                                                                                                                | 0.5138 | 0.0067 |
| 230185_at   | THAP9     | THAP domain containing 9                                                                                                         | 0.7396 | 0.0009 |
| 230198_at   | WDR37     | WD repeat domain 37                                                                                                              | 0.5201 | 0.0152 |
| 230205_at   | ZNF561    | zinc finger protein 561                                                                                                          | 0.8768 | 0.005  |
| 230225_x_at |           | Transcribed locus                                                                                                                | 0.1212 | 0.0199 |
| 230229_at   | DLG1      | Discs; large homolog 1 (Drosophila)                                                                                              | 1.3619 | 0.0213 |
| 230235_at   |           | Transcribed locus                                                                                                                | 0.54   | 0.0017 |
| 230255_at   | GABRD     | gamma-aminobutyric acid (GABA) A receptor; delta                                                                                 | 0.2014 | 0.0065 |
| 230256_at   | C1orf104  | Chromosome 1 open reading frame 104                                                                                              | 1.5564 | 0.0254 |
| 230272_at   | LOC645323 | hypothetical LOC645323                                                                                                           | 1.8322 | 0.0084 |
| 230277_at   |           |                                                                                                                                  | 0.5553 | 0.029  |
| 230304_at   |           | CDNA clone IMAGE:30332316                                                                                                        | 0.9434 | 0.0031 |
| 230312_at   |           | Transcribed locus                                                                                                                | 1.4021 | 0.0001 |
| 230324_at   |           | Transcribed locus                                                                                                                | 0.5158 | 0.0009 |
| 230336_at   |           | Transcribed locus                                                                                                                | 0.5284 | 0.0017 |

|             |           |                                                                                                    |        |        |
|-------------|-----------|----------------------------------------------------------------------------------------------------|--------|--------|
| 230337_at   | SOS1      | son of sevenless homolog 1 (Drosophila)                                                            | 0.6277 | 0.0356 |
| 230345_at   |           | Transcribed locus                                                                                  | 0.8266 | 0.015  |
| 230361_at   | KIAA1833  | hypothetical protein KIAA1833                                                                      | 0.3131 | 0.0047 |
| 230375_at   | SFRS18    | splicing factor; arginine/serine-rich 18                                                           | 0.8587 | 0.0077 |
| 230387_at   |           | Transcribed locus                                                                                  | 1.4967 | 0.0001 |
| 230401_at   |           | Transcribed locus                                                                                  | 0.3313 | 0.0061 |
| 230402_at   | DUSP15    | dual specificity phosphatase 15                                                                    | 0.717  | 0.0179 |
| 230404_at   |           |                                                                                                    | 0.3826 | 0.0253 |
| 230411_at   |           | CDNA FLJ41934 fis; clone PERIC2005111                                                              | 0.643  | 0.0072 |
| 230424_at   | C5orf13   | chromosome 5 open reading frame 13                                                                 | 2.5785 | 0      |
| 230425_at   | EPHB1     | EPH receptor B1                                                                                    | 1.6701 | 0.0224 |
| 230426_at   | DLD       | dihydroipoamide dehydrogenase                                                                      | 0.5486 | 0.0372 |
| 230434_at   | PHOSPHO2  | phosphatase; orphan 2                                                                              | 0.979  | 0.0012 |
| 230450_at   |           | Transcribed locus; moderately similar to XP_517655.1 similar to KIAA0825 protein [Pan troglodytes] | 0.5909 | 0.0014 |
| 230452_at   | FLJ42351  | hypothetical gene supported by AK124342                                                            | 0.2662 | 0.0269 |
| 230461_s_at | MUM1      | Melanoma associated antigen (mutated) 1                                                            | 0.5866 | 0.0062 |
| 230462_at   | NUMB      | numb homolog (Drosophila)                                                                          | 0.6847 | 0.0025 |
| 230483_at   |           | Transcribed locus                                                                                  | 0.3339 | 0.0251 |
| 230497_at   | BRUNOL5   | bruno-like 5; RNA binding protein (Drosophila)                                                     | 0.4232 | 0.0041 |
| 230516_at   | C7orf30   | Chromosome 7 open reading frame 30                                                                 | 1.0319 | 0.0006 |
| 230521_at   | C9orf100  | chromosome 9 open reading frame 100                                                                | 0.498  | 0.0165 |
| 230522_s_at | C9orf100  | chromosome 9 open reading frame 100                                                                | 0.52   | 0.0071 |
| 230528_s_at | MGC2752   | hypothetical protein MGC2752                                                                       | 0.699  | 0.0074 |
| 230533_at   | ZMYND8    | zinc finger; MYND-type containing 8                                                                | 0.8547 | 0.014  |
| 230556_at   | IMMP1L    | IMP1 inner mitochondrial membrane peptidase-like (S. cerevisiae)                                   | 0.5094 | 0.0194 |
| 230560_at   | STXBP6    | syntaxin binding protein 6 (amisyn)                                                                | 1.7942 | 0.0158 |
| 230578_at   | ZNF471    | Zinc finger protein 471                                                                            | 0.8411 | 0.0272 |
| 230579_at   | LOC728705 | hypothetical protein LOC728705                                                                     | 0.2979 | 0.0141 |
| 230581_at   |           | CDNA FLJ32217 fis; clone PLACE6003771                                                              | 0.5358 | 0.0292 |
| 230583_s_at | ZNF75     | zinc finger protein 75 (D8C6)                                                                      | 0.2368 | 0.0353 |
| 230584_at   | ZNF75     | zinc finger protein 75 (D8C6)                                                                      | 0.2189 | 0.0258 |
| 230588_s_at | LOC285074 | Hypothetical protein LOC285074                                                                     | 0.7069 | 0.0101 |
| 230601_s_at | LRRC46    | leucine rich repeat containing 46                                                                  | 0.1932 | 0.023  |
| 230609_at   | CLINT1    | clathrin interactor 1                                                                              | 0.3697 | 0.0417 |
| 230620_at   |           | Transcribed locus                                                                                  | 0.8692 | 0.012  |
| 230629_s_at | EP400     | E1A binding protein p400                                                                           | 0.5203 | 0.0448 |

|             |           |                                                                 |        |        |
|-------------|-----------|-----------------------------------------------------------------|--------|--------|
| 230630_at   | AK3L2     | adenylate kinase 3-like 2                                       | 1.7675 | 0.006  |
| 230637_at   | SFXN4     | Sideroflexin 4                                                  | 0.6574 | 0.0125 |
| 230647_at   | TMEM53    | transmembrane protein 53                                        | 0.356  | 0.0123 |
| 230651_at   |           | Transcribed locus                                               | 1.0175 | 0.0165 |
| 230653_at   | LOC728555 | hypothetical protein LOC728555, hypothetical protein LOC730391  | 1.7035 | 0      |
| 230654_at   |           | Transcribed locus                                               | 0.4043 | 0.0139 |
| 230664_at   | MGC39900  | hypothetical protein MGC39900                                   | 0.7088 | 0.0069 |
| 230666_at   | HOXA11S   | homeo box A11; antisense                                        | 0.861  | 0.0307 |
| 230676_s_at | TMEM19    | transmembrane protein 19                                        | 0.417  | 0.0085 |
| 230684_at   | GTPBP10   | GTP-binding protein 10 (putative)                               | 0.4389 | 0.0022 |
| 230689_at   |           | Transcribed locus                                               | 0.4537 | 0.0162 |
| 230696_at   |           | Transcribed locus                                               | 0.2048 | 0.0011 |
| 230697_at   | BBS5      | Bardet-Biedl syndrome 5                                         | 0.2612 | 0.0015 |
| 230702_at   | C8orf16   | chromosome 8 open reading frame 16                              | 0.2844 | 0.0142 |
| 230710_at   |           | CDNA FLJ14189 fis; clone BRTHA2004582                           | 1.5294 | 0.0088 |
| 230725_at   |           |                                                                 | 0.1881 | 0.025  |
| 230728_at   |           | Transcribed locus                                               | 0.3941 | 0.0459 |
| 230738_at   |           | CDNA clone IMAGE:6342029                                        | 0.7947 | 0.0234 |
| 230746_s_at | STC1      | Stanniocalcin 1                                                 | 4.0012 | 0      |
| 230758_at   | GEMIN8    | gem (nuclear organelle) associated protein 8                    | 0.8586 | 0.0199 |
| 230786_at   |           | Transcribed locus                                               | 0.3224 | 0.0284 |
| 230789_at   | SUHW2     | suppressor of hairy wing homolog 2 (Drosophila)                 | 1.8453 | 0.0001 |
| 230792_at   | FAAH2     | fatty acid amide hydrolase 2                                    | 1.1039 | 0.0087 |
| 230803_s_at | ARHGAP24  | Rho GTPase activating protein 24                                | 0.4404 | 0.025  |
| 230808_at   | FNTA      | farnesyltransferase; CAAX box; alpha                            | 0.2071 | 0.0092 |
| 230838_s_at | CIAPIN1   | cytokine induced apoptosis inhibitor 1                          | 0.3397 | 0.0071 |
| 230843_at   |           | Transcribed locus                                               | 0.2646 | 0.0263 |
| 230860_at   |           | Transcribed locus                                               | 0.4504 | 0.0126 |
| 230864_at   | MGC42105  | hypothetical protein MGC42105                                   | 1.0451 | 0.0087 |
| 230876_at   | LOC169834 | hypothetical protein LOC169834                                  | 1.0302 | 0.0122 |
| 230882_at   | FLJ34048  | hypothetical protein FLJ34048                                   | 0.729  | 0.0075 |
| 230884_s_at | SPG7      | spastic paraplegia 7 (pure and complicated autosomal recessive) | 1.4179 | 0.0008 |
| 230885_at   | SPG7      | spastic paraplegia 7 (pure and complicated autosomal recessive) | 0.7957 | 0.0062 |
| 230892_at   |           | Transcribed locus                                               | 0.8288 | 0.0031 |
| 230898_at   |           | Transcribed locus                                               | 0.1998 | 0.0295 |
| 230904_at   | FSD1L     | fibronectin type III and SPRY domain containing 1-like          | 0.7674 | 0.0047 |

|             |           |                                                                                                   |        |        |
|-------------|-----------|---------------------------------------------------------------------------------------------------|--------|--------|
| 230906_at   | GALNT10   | UDP-N-acetyl-alpha-D-galactosamine:polypeptide N-acetylgalactosaminyltransferase 10 (GalNAc-T10)  | 0.7136 | 0.0221 |
| 230920_at   | LOC284542 | hypothetical protein LOC284542                                                                    | 0.314  | 0.0401 |
| 230927_at   |           | Transcribed locus                                                                                 | 0.722  | 0.0014 |
| 230959_at   | LOC730453 | hypothetical protein LOC730453                                                                    | 1.5772 | 0.0107 |
| 230961_at   |           |                                                                                                   | 1.1958 | 0.0058 |
| 230962_at   |           | Clones 24632 and 24634 mRNA sequence                                                              | 0.1859 | 0.0036 |
| 230991_at   |           | Transcribed locus                                                                                 | 0.7883 | 0.0051 |
| 230998_at   |           | Transcribed locus                                                                                 | 1.3018 | 0.0008 |
| 231012_at   | TMEM20    | transmembrane protein 20                                                                          | 0.2991 | 0.0342 |
| 231024_at   | LOC572558 | hypothetical locus LOC572558                                                                      | 0.9842 | 0.0218 |
| 231056_at   | LOC339352 | similar to ATP binding domain 3                                                                   | 0.4643 | 0.0157 |
| 231059_x_at | SCAND1    | SCAN domain containing 1                                                                          | 0.3907 | 0.049  |
| 231088_at   | LOC340544 | Hypothetical protein LOC340544                                                                    | 0.2689 | 0.0306 |
| 231090_s_at | ARID2     | AT rich interactive domain 2 (ARID; RFX-like)                                                     | 0.6665 | 0.0003 |
| 231099_at   |           | MRNA; cDNA DKFZp547C072 (from clone DKFZp547C072)                                                 | 0.1993 | 0.0365 |
| 231102_at   | CROT      | carnitine O-octanoyltransferase                                                                   | 0.9199 | 0.0071 |
| 231106_at   | BMS1P5    | BMS1 pseudogene 5, centaurin; gamma-like family; member 6, centaurin; gamma-like family; member 7 | 0.9312 | 0.0013 |
| 231108_at   | FUS       | Fusion (involved in t(12;16) in malignant liposarcoma)                                            | 1.0008 | 0.0195 |
| 231115_at   |           | Transcribed locus                                                                                 | 0.3005 | 0.0169 |
| 231125_at   |           | CDNA clone IMAGE:4453251                                                                          | 0.2457 | 0.0069 |
| 231131_at   | FAM133A   | family with sequence similarity 133; member A                                                     | 1.822  | 0.0186 |
| 231146_at   | FAM24B    | family with sequence similarity 24; member B                                                      | 0.6371 | 0.0003 |
| 231149_s_at | ULK4      | unc-51-like kinase 4 (C. elegans)                                                                 | 0.4115 | 0.0033 |
| 231152_at   | FLJ20309  | Hypothetical protein FLJ20309                                                                     | 0.2502 | 0.0148 |
| 231164_at   | LOC440331 | hypothetical gene supported by AK095200; BC042853                                                 | 0.7211 | 0.0308 |
| 231165_at   |           | Transcribed locus                                                                                 | 0.4175 | 0.0013 |
| 231173_at   | LOC642732 | pyridine nucleotide-disulphide oxidoreductase domain 1, similar to CG10721-PA                     | 0.3104 | 0.0285 |
| 231175_at   | C6orf65   | chromosome 6 open reading frame 65                                                                | 0.4984 | 0.0324 |
| 231183_s_at | JAG1      | Jagged 1 (Alagille syndrome)                                                                      | 1.9306 | 0.0002 |
| 231188_at   | ZSCAN2    | zinc finger and SCAN domain containing 2                                                          | 0.3418 | 0.0003 |
| 231207_at   |           |                                                                                                   | 1.3591 | 0.0002 |
| 231208_at   |           | CDNA FLJ13245 fis; clone OVARC1000681                                                             | 0.3016 | 0.0214 |
| 231219_at   | CMTM1     | CKLF-like MARVEL transmembrane domain containing 1                                                | 0.3992 | 0.0015 |
| 231225_at   |           |                                                                                                   | 0.5392 | 0.0001 |

|             |           |                                                                                                                                 |        |        |
|-------------|-----------|---------------------------------------------------------------------------------------------------------------------------------|--------|--------|
| 231233_at   |           |                                                                                                                                 | 0.8441 | 0.03   |
| 231235_at   | NKTR      | natural killer-tumor recognition sequence                                                                                       | 0.5058 | 0.0203 |
| 231247_s_at | LOC642441 | hypothetical LOC642441, hypothetical protein LOC730256, hypothetical protein LOC730257                                          | 0.178  | 0.0027 |
| 231249_at   |           | Transcribed locus; moderately similar to XP_001094962.1 similar to hydroxypyruvate isomerase homolog isoform 5 [Macaca mulatta] | 0.3666 | 0.0161 |
| 231282_at   | ZCD1      | Zinc finger; CDGSH-type domain 1                                                                                                | 0.1212 | 0.0346 |
| 231297_at   | DOT1L     | DOT1-like; histone H3 methyltransferase (S. cerevisiae)                                                                         | 0.4859 | 0.0231 |
| 231316_at   |           | Transcribed locus                                                                                                               | 0.618  | 0.0105 |
| 231332_at   |           | Transcribed locus                                                                                                               | 0.6603 | 0.0001 |
| 231374_at   |           | Transcribed locus                                                                                                               | 0.4182 | 0.0088 |
| 231437_at   | SLC35D2   | solute carrier family 35; member D2                                                                                             | 0.4316 | 0.0059 |
| 231471_at   |           | Transcribed locus                                                                                                               | 0.2921 | 0.0174 |
| 231487_at   | COX8C     | cytochrome c oxidase subunit 8C                                                                                                 | 0.1059 | 0.0078 |
| 231513_at   |           | Transcribed locus                                                                                                               | 1.4734 | 0.0018 |
| 231560_at   |           |                                                                                                                                 | 0.1218 | 0.0341 |
| 231569_at   | TMEM31    | transmembrane protein 31                                                                                                        | 0.5344 | 0.0441 |
| 231573_at   | FATE1     | fetal and adult testis expressed 1                                                                                              | 2.7019 | 0.0165 |
| 231576_at   |           | Transcribed locus                                                                                                               | 1.8468 | 0.001  |
| 231609_at   | C10orf82  | chromosome 10 open reading frame 82                                                                                             | 1.96   | 0.0141 |
| 231614_at   |           | Transcribed locus                                                                                                               | 0.1503 | 0.0288 |
| 231696_x_at | LOC654779 | Hypothetical gene LOC654779                                                                                                     | 0.2124 | 0.0046 |
| 231716_at   | RC3H2     | ring finger and CCCH-type zinc finger domains 2                                                                                 | 0.7478 | 0.0004 |
| 231717_s_at | ZNF226    | zinc finger protein 226                                                                                                         | 0.1238 | 0.036  |
| 231725_at   | PCDHB2    | protocadherin beta 2                                                                                                            | 0.8091 | 0.0269 |
| 231726_at   | PCDHB14   | protocadherin beta 14                                                                                                           | 0.8694 | 0.0224 |
| 231763_at   | POLR3A    | polymerase (RNA) III (DNA directed) polypeptide A; 155kDa                                                                       | 0.4511 | 0.0245 |
| 231764_at   | CHRAC1    | chromatin accessibility complex 1                                                                                               | 0.4799 | 0.0388 |
| 231772_x_at | CENPH     | centromere protein H                                                                                                            | 1.7353 | 0.0001 |
| 231775_at   | TNFRSF10A | tumor necrosis factor receptor superfamily; member 10a                                                                          | 0.9087 | 0.0054 |
| 231784_s_at | WDSOF1    | WD repeats and SOF1 domain containing                                                                                           | 0.6318 | 0.0127 |
| 231786_at   | HOXA13    | homeobox A13                                                                                                                    | 2.5177 | 0      |
| 231787_at   | SLC25A27  | solute carrier family 25; member 27                                                                                             | 0.4227 | 0.0082 |
| 231809_x_at | PDCD7     | programmed cell death 7                                                                                                         | 0.4907 | 0.0112 |
| 231810_at   | BRI3BP    | BRI3 binding protein                                                                                                            | 1.1543 | 0.0007 |
| 231819_at   |           | Homo sapiens; clone IMAGE:3885733; mRNA                                                                                         | 0.8589 | 0.0419 |
| 231820_x_at | ZNF587    | zinc finger protein 587                                                                                                         | 0.8973 | 0.001  |

|             |               |                                                                                                                                                                                                                                                                                              |        |        |
|-------------|---------------|----------------------------------------------------------------------------------------------------------------------------------------------------------------------------------------------------------------------------------------------------------------------------------------------|--------|--------|
| 231821_x_at | FLJ14186      | hypothetical LOC402483, hypothetical gene supported by AK024248; AL137733, hypothetical gene supported by AK093729; BX647918, hypothetical protein LOC284701, hypothetical protein LOC728624, hypothetical protein LOC729021, hypothetical protein LOC729033, hypothetical protein LOC731275 | 0.4738 | 0.0306 |
| 231822_at   | CTTNBP2NL     | CTTNBP2 N-terminal like                                                                                                                                                                                                                                                                      | 0.4841 | 0.0371 |
| 231825_x_at | ATF7IP        | activating transcription factor 7 interacting protein                                                                                                                                                                                                                                        | 0.7264 | 0      |
| 231827_at   |               | Full length insert cDNA clone ZE04G11                                                                                                                                                                                                                                                        | 0.389  | 0.0136 |
| 231829_at   | VISA          | virus-induced signaling adapter                                                                                                                                                                                                                                                              | 0.7513 | 0.0245 |
| 231831_at   | COX19         | COX19 cytochrome c oxidase assembly homolog (S. cerevisiae)                                                                                                                                                                                                                                  | 0.2575 | 0.0089 |
| 231833_at   | RBM33         | RNA binding motif protein 33                                                                                                                                                                                                                                                                 | 0.1471 | 0.0316 |
| 231837_at   | USP28         | ubiquitin specific peptidase 28                                                                                                                                                                                                                                                              | 0.4702 | 0.0186 |
| 231840_x_at | LYRM7         | Lyrm7 homolog (mouse)                                                                                                                                                                                                                                                                        | 1.1641 | 0.0003 |
| 231843_at   | DDX55         | DEAD (Asp-Glu-Ala-Asp) box polypeptide 55                                                                                                                                                                                                                                                    | 0.8741 | 0.0021 |
| 231844_at   | MGC27345      | hypothetical protein MGC27345                                                                                                                                                                                                                                                                | 0.561  | 0.0004 |
| 231845_at   | AARS2         | alanyl-tRNA synthetase 2; mitochondrial (putative)                                                                                                                                                                                                                                           | 0.5977 | 0.009  |
| 231846_at   | FOXRED2       | FAD-dependent oxidoreductase domain containing 2                                                                                                                                                                                                                                             | 0.7066 | 0.0452 |
| 231850_x_at | KIAA1712      | KIAA1712                                                                                                                                                                                                                                                                                     | 0.517  | 0.0012 |
| 231852_at   | THEX1         | three prime histone mRNA exonuclease 1                                                                                                                                                                                                                                                       | 0.5874 | 0.0033 |
| 231855_at   | KIAA1524      | KIAA1524                                                                                                                                                                                                                                                                                     | 1.4145 | 0.0001 |
| 231862_at   |               | CDNA clone IMAGE:4842353                                                                                                                                                                                                                                                                     | 1.7833 | 0      |
| 231866_at   | LNPEP         | leucyl/cystinyl aminopeptidase                                                                                                                                                                                                                                                               | 0.5494 | 0.0349 |
| 231869_at   | KIAA1586      | KIAA1586                                                                                                                                                                                                                                                                                     | 0.5855 | 0.0397 |
| 231871_at   | GPR180        | G protein-coupled receptor 180                                                                                                                                                                                                                                                               | 0.4347 | 0.0404 |
| 231874_at   | FAM126B       | family with sequence similarity 126; member B                                                                                                                                                                                                                                                | 1.2358 | 0.0003 |
| 231875_at   | KIF21A        | kinesin family member 21A                                                                                                                                                                                                                                                                    | 0.46   | 0.0117 |
| 231876_at   | TRIM56        | tripartite motif-containing 56                                                                                                                                                                                                                                                               | 0.4174 | 0.026  |
| 231878_at   | MVP           | Major vault protein                                                                                                                                                                                                                                                                          | 0.7428 | 0.0173 |
| 231882_at   | FLJ39632      | hypothetical LOC642477                                                                                                                                                                                                                                                                       | 3.2448 | 0      |
| 231883_at   | FBXW8         | F-box and WD repeat domain containing 8                                                                                                                                                                                                                                                      | 0.6985 | 0.0009 |
| 231886_at   | DKFZP434B2016 | similar to hypothetical protein LOC284701                                                                                                                                                                                                                                                    | 0.6869 | 0.0005 |
| 231895_at   | SASS6         | spindle assembly 6 homolog (C. elegans)                                                                                                                                                                                                                                                      | 0.621  | 0.0007 |
| 231896_s_at | DENR          | density-regulated protein                                                                                                                                                                                                                                                                    | 0.6486 | 0      |
| 231901_at   | C19orf52      | chromosome 19 open reading frame 52                                                                                                                                                                                                                                                          | 0.5012 | 0.0035 |
| 231912_s_at | DKFZP434B0335 | DKFZP434B0335 protein                                                                                                                                                                                                                                                                        | 0.4277 | 0.0143 |
| 231917_at   | GFM2          | G elongation factor; mitochondrial 2                                                                                                                                                                                                                                                         | 0.9861 | 0.0077 |

|             |               |                                                                                                                            |        |        |
|-------------|---------------|----------------------------------------------------------------------------------------------------------------------------|--------|--------|
| 231918_s_at | GFM2          | G elongation factor; mitochondrial 2                                                                                       | 1.4988 | 0.0072 |
| 231920_s_at | CSNK1G1       | casein kinase 1; gamma 1                                                                                                   | 0.2788 | 0.0304 |
| 231937_at   |               | CDNA FLJ14200 fis; clone NT2RP3002799                                                                                      | 0.3961 | 0.0073 |
| 231938_at   | SGOL1         | Shugoshin-like 1 (S. pombe)                                                                                                | 0.4576 | 0.0024 |
| 231939_s_at | BDP1          | B double prime 1; subunit of RNA polymerase III transcription initiation factor IIIB                                       | 0.4404 | 0.0004 |
| 231954_at   | DKFZP434I0714 | hypothetical protein DKFZP434I0714                                                                                         | 0.4527 | 0.014  |
| 231956_at   | KIAA1618      | KIAA1618                                                                                                                   | 0.7526 | 0.0284 |
| 231957_s_at | DPP9          | dipeptidyl-peptidase 9                                                                                                     | 0.3814 | 0.0012 |
| 231964_at   |               | MRNA; cDNA DKFZp564H1663 (from clone DKFZp564H1663)                                                                        | 1.2979 | 0.0061 |
| 231965_at   | FAM113A       | family with sequence similarity 113; member A                                                                              | 0.2082 | 0.0365 |
| 231969_at   | STOX2         | storkhead box 2                                                                                                            | 1.2214 | 0.0195 |
| 231972_at   |               | CDNA: FLJ21028 fis; clone CAE07155                                                                                         | 0.4291 | 0.0188 |
| 231973_s_at | ANAPC1        | anaphase promoting complex subunit 1                                                                                       | 1.1043 | 0.0026 |
| 231974_at   | MLL2          | myeloid/lymphoid or mixed-lineage leukemia 2                                                                               | 0.4144 | 0.0344 |
| 231975_s_at | MIER3         | mesoderm induction early response 1; family member 3                                                                       | 0.7815 | 0.0066 |
| 231976_at   | LINS1         | lines homolog 1 (Drosophila)                                                                                               | 0.5522 | 0.0381 |
| 231979_at   |               | CDNA FLJ13266 fis; clone OVARC1000960                                                                                      | 0.8343 | 0.009  |
| 231989_s_at | LOC440345     | PI-3-kinase-related kinase SMG-1 - like locus, hypothetical protein LOC440345, similar to PI-3-kinase-related kinase SMG-1 | 1.6678 | 0      |
| 231996_at   | N4BP2         | Nedd4 binding protein 2                                                                                                    | 0.5558 | 0.027  |
| 232002_at   |               | MRNA; cDNA DKFZp547I084 (from clone DKFZp547I084)                                                                          | 1.067  | 0.0082 |
| 232012_at   | CAPN1         | calpain 1; (mu/l) large subunit                                                                                            | 0.7285 | 0.001  |
| 232023_at   | TMEM67        | transmembrane protein 67                                                                                                   | 0.7933 | 0.0033 |
| 232028_at   | ZNF678        | Zinc finger protein 678                                                                                                    | 1.0737 | 0.0226 |
| 232031_s_at | KIAA1632      | KIAA1632                                                                                                                   | 0.2938 | 0.011  |
| 232034_at   | LOC203274     | hypothetical protein LOC203274                                                                                             | 0.8526 | 0.0155 |
| 232055_at   | LOC732233     | hypothetical protein LOC732233, sideroflexin 1                                                                             | 1.43   | 0      |
| 232057_at   | SLC7A6OS      | solute carrier family 7; member 6 opposite strand                                                                          | 0.4392 | 0.048  |
| 232060_at   | ROR1          | receptor tyrosine kinase-like orphan receptor 1                                                                            | 1.2247 | 0.0401 |
| 232064_at   |               | CDNA FLJ35001 fis; clone OCBBF2011887                                                                                      | 0.7946 | 0.0291 |
| 232065_x_at | CENPL         | centromere protein L                                                                                                       | 1.0983 | 0.0027 |
| 232070_at   | LOC644010     | hypothetical LOC644010                                                                                                     | 0.4008 | 0      |
| 232076_at   | ZNF707        | zinc finger protein 707                                                                                                    | 0.1736 | 0.0158 |
| 232078_at   | PVRL2         | poliovirus receptor-related 2 (herpesvirus entry mediator B)                                                               | 1.0107 | 0.0176 |
| 232087_at   | CXorf23       | chromosome X open reading frame 23                                                                                         | 0.669  | 0.0134 |

|             |           |                                                                                   |        |        |
|-------------|-----------|-----------------------------------------------------------------------------------|--------|--------|
| 232089_at   | TIGD7     | Tigger transposable element derived 7                                             | 0.2178 | 0.0133 |
| 232092_at   | MCART1    | mitochondrial carrier triple repeat 1                                             | 0.2334 | 0.0155 |
| 232094_at   |           | CDNA FLJ11404 fis; clone HEMBA1000749                                             | 0.7622 | 0.0392 |
| 232106_s_at | CCDC123   | Coiled-coil domain containing 123                                                 | 0.3502 | 0.0007 |
| 232117_at   | ZNF471    | zinc finger protein 471                                                           | 0.3472 | 0.018  |
| 232128_s_at | CLCN5     | chloride channel 5 (nephrolithiasis 2; X-linked; Dent disease)                    | 0.1937 | 0.0138 |
| 232135_at   | LOC56755  | hypothetical protein LOC56755                                                     | 0.7975 | 0.0002 |
| 232145_at   | LOC388969 | hypothetical LOC388969                                                            | 0.9075 | 0.0054 |
| 232146_at   | NDUFC1    | NADH dehydrogenase (ubiquinone) 1; subcomplex unknown; 1; 6kDa                    | 0.5169 | 0.0351 |
| 232147_at   | BTBD12    | BTB (POZ) domain containing 12                                                    | 0.3769 | 0.002  |
| 232148_at   | NSMAF     | Neutral sphingomyelinase (N-SMase) activation associated factor                   | 0.4876 | 0.0033 |
| 232149_s_at | NSMAF     | neutral sphingomyelinase (N-SMase) activation associated factor                   | 0.8639 | 0.0121 |
| 232150_at   |           | CDNA clone IMAGE:4792085                                                          | 1.1973 | 0      |
| 232152_at   | C6orf182  | chromosome 6 open reading frame 182                                               | 0.22   | 0.0181 |
| 232158_x_at | NPAL1     | NIPA-like domain containing 1                                                     | 0.1413 | 0.0095 |
| 232163_at   | WDR19     | WD repeat domain 19                                                               | 0.361  | 0.0136 |
| 232167_at   | SLC2A11   | solute carrier family 2 (facilitated glucose transporter); member 11              | 0.358  | 0.045  |
| 232168_x_at | MACF1     | microtubule-actin crosslinking factor 1                                           | 0.26   | 0.028  |
| 232169_x_at | NDUFS8    | NADH dehydrogenase (ubiquinone) Fe-S protein 8; 23kDa (NADH-coenzyme Q reductase) | 0.5707 | 0.0023 |
| 232180_at   | UGP2      | UDP-glucose pyrophosphorylase 2                                                   | 1.1404 | 0.0026 |
| 232182_at   | LOC286272 | hypothetical protein LOC286272                                                    | 0.8638 | 0.0021 |
| 232194_at   | METTL4    | methyltransferase like 4                                                          | 0.438  | 0.0147 |
| 232195_at   | GPR158    | G protein-coupled receptor 158                                                    | 1.0378 | 0.0321 |
| 232198_at   |           | CDNA FLJ12676 fis; clone NT2RM4002383                                             | 0.2836 | 0.0316 |
| 232204_at   | EBF1      | early B-cell factor 1                                                             | 1.3988 | 0.0252 |
| 232215_x_at | PRR11     | proline rich 11                                                                   | 0.3579 | 0.0072 |
| 232221_x_at | RSBN1L    | round spermatid basic protein 1-like                                              | 0.2466 | 0.0453 |
| 232230_at   | C10orf75  | Chromosome 10 open reading frame 75                                               | 0.5715 | 0.04   |
| 232236_at   |           | CDNA: FLJ22146 fis; clone HEP22153                                                | 0.3211 | 0.0003 |
| 232238_at   | ASPM      | asp (abnormal spindle) homolog; microcephaly associated (Drosophila)              | 0.8049 | 0.0042 |
| 232247_at   | ZNF502    | zinc finger protein 502                                                           | 0.5298 | 0.0209 |
| 232261_at   |           | Homo sapiens; clone IMAGE:5168282; mRNA                                           | 0.1308 | 0.0454 |
| 232264_at   |           | CDNA FLJ12142 fis; clone MAMMA1000356                                             | 1.0155 | 0.0075 |
| 232266_x_at | CDC2L5    | Cell division cycle 2-like 5 (cholinesterase-related cell division controller)    | 0.5404 | 0.0067 |



|             |           |                                                                                      |        |        |
|-------------|-----------|--------------------------------------------------------------------------------------|--------|--------|
| 232273_at   |           | CDNA: FLJ21850 fis; clone HEP01929                                                   | 0.4816 | 0.0122 |
| 232278_s_at | DEPDC1    | DEP domain containing 1                                                              | 2.2513 | 0.0013 |
| 232281_at   | LOC148189 | Hypothetical protein LOC148189                                                       | 0.2447 | 0.0199 |
| 232288_at   | PDXDC1    | pyridoxal-dependent decarboxylase domain containing 1                                | 0.5831 | 0.0133 |
| 232293_at   | LCORL     | ligand dependent nuclear receptor corepressor-like                                   | 0.8033 | 0.0036 |
| 232295_at   | GFM1      | G elongation factor; mitochondrial 1                                                 | 0.3217 | 0.0008 |
| 232301_at   | UBE3B     | ubiquitin protein ligase E3B                                                         | 0.5562 | 0      |
| 232307_at   |           | CDNA FLJ11492 fis; clone HEMBA1001939                                                | 0.8092 | 0.0238 |
| 232315_at   | LOC400713 | Zinc finger-like                                                                     | 1.3323 | 0.016  |
| 232319_at   |           | CDNA FLJ12360 fis; clone MAMMA1002356                                                | 0.3611 | 0.0093 |
| 232327_at   | THSD7B    | thrombospondin; type I; domain containing 7B                                         | 1.0553 | 0.0105 |
| 232338_at   |           | CDNA FLJ11553 fis; clone HEMBA1003034                                                | 1.22   | 0.038  |
| 232344_at   |           | CDNA FLJ11750 fis; clone HEMBA1005568                                                | 1.6385 | 0      |
| 232346_at   |           | CDNA FLJ13580 fis; clone PLACE1008851                                                | 0.2976 | 0.0485 |
| 232347_x_at |           | CDNA FLJ11379 fis; clone HEMBA1000469                                                | 1.0297 | 0.0003 |
| 232351_at   |           | CDNA FLJ12246 fis; clone MAMMA1001343                                                | 0.4443 | 0.0096 |
| 232356_at   |           | CDNA FLJ13539 fis; clone PLACE1006640                                                | 0.6494 | 0.0387 |
| 232359_at   | RDH11     | Retinol dehydrogenase 11 (all-trans/9-cis/11-cis)                                    | 0.1845 | 0.0129 |
| 232362_at   | CCDC18    | coiled-coil domain containing 18                                                     | 0.3515 | 0.0077 |
| 232363_at   |           | CDNA: FLJ20863 fis; clone ADKA01804                                                  | 0.5379 | 0.0123 |
| 232366_at   | KIAA0232  | KIAA0232                                                                             | 0.9175 | 0.0076 |
| 232385_x_at |           | CDNA: FLJ22020 fis; clone HEP08123                                                   | 0.1504 | 0.0173 |
| 232395_x_at | AGBL3     | ATP/GTP binding protein-like 3                                                       | 0.5665 | 0.0008 |
| 232398_at   | FLJ39660  | hypothetical protein FLJ39660                                                        | 0.9699 | 0.0037 |
| 232406_at   |           | CDNA FLJ13731 fis; clone PLACE3000142                                                | 1.5408 | 0.0039 |
| 232410_at   |           | MRNA differentially expressed from human RPE cell in differential display experiment | 0.313  | 0.0024 |
| 232412_at   |           | CDNA: FLJ21037 fis; clone CAE10055                                                   | 1.1722 | 0.0108 |
| 232427_at   | ZNF224    | Zinc finger protein 224                                                              | 0.6337 | 0.0009 |
| 232431_at   |           | Glucocorticoid receptor alpha mRNA; variant 3' UTR                                   | 1.4968 | 0.0004 |
| 232436_at   | ZNF274    | zinc finger protein 274                                                              | 0.5665 | 0.0089 |
| 232440_at   | ZDHHC13   | Zinc finger; DHC-type containing 13                                                  | 0.4771 | 0.0012 |
| 232441_at   | KRR1      | KRR1; small subunit (SSU) processome component; homolog (yeast)                      | 1.1224 | 0.0032 |
| 232442_at   | BCAR1     | Breast cancer anti-estrogen resistance 1                                             | 0.2314 | 0.0267 |

|             |               |                                                                     |        |        |
|-------------|---------------|---------------------------------------------------------------------|--------|--------|
| 232463_at   | CXYorf10      | chromosome X and Y open reading frame 10                            | 0.3787 | 0.003  |
| 232469_x_at | C1orf191      | Chromosome 1 open reading frame 191                                 | 0.2972 | 0.0009 |
| 232478_at   |               | CDNA clone IMAGE:4815026                                            | 1.5721 | 0.0006 |
| 232489_at   | CCDC76        | coiled-coil domain containing 76                                    | 0.9883 | 0.0023 |
| 232510_s_at | DPP3          | dipeptidyl-peptidase 3                                              | 0.5609 | 0.0417 |
| 232523_at   | MEGF10        | multiple EGF-like-domains 10                                        | 2.1382 | 0.0146 |
| 232529_at   | SP3           | Sp3 transcription factor                                            | 0.672  | 0.0036 |
| 232537_x_at | MARK3         | MAP/microtubule affinity-regulating kinase 3                        | 0.56   | 0.0113 |
| 232551_at   | SLC26A6       | solute carrier family 26; member 6                                  | 0.525  | 0.0256 |
| 232552_at   | DAAM1         | Dishevelled associated activator of morphogenesis 1                 | 0.6056 | 0.0389 |
| 232559_at   |               | CDNA FLJ11683 fis; clone HEMBA1004900                               | 0.2064 | 0.0364 |
| 232560_at   | UROS          | uroporphyrinogen III synthase (congenital erythropoietic porphyria) | 0.1594 | 0.0113 |
| 232563_at   | ZNF684        | zinc finger protein 684                                             | 1.1714 | 0.012  |
| 232569_at   |               | CDNA FLJ14193 fis; clone NT2RP3001115                               | 0.7233 | 0.0006 |
| 232579_at   |               | CDNA: FLJ22719 fis; clone HSI14307                                  | 0.5416 | 0.0163 |
| 232580_x_at |               | MRNA; cDNA DKFZp564F1171 (from clone DKFZp564F1171)                 | 0.5022 | 0.0044 |
| 232596_at   | DIAPH3        | diaphanous homolog 3 (Drosophila)                                   | 0.6558 | 0.0007 |
| 232597_x_at | SFRS2IP       | Splicing factor; arginine/serine-rich 2; interacting protein        | 0.6346 | 0.0334 |
| 232599_at   | EXOC6         | exocyst complex component 6                                         | 0.4038 | 0.0053 |
| 232611_at   | LOC92497      | hypothetical protein LOC92497                                       | 0.3097 | 0.0089 |
| 232612_s_at | ATG16L1       | ATG16 autophagy related 16-like 1 (S. cerevisiae)                   | 0.2103 | 0.0359 |
| 232615_at   |               | CDNA: FLJ22765 fis; clone KAIA1180                                  | 1.3624 | 0.0015 |
| 232627_at   |               | CDNA FLJ11421 fis; clone HEMBA1000991                               | 0.1687 | 0.0364 |
| 232632_at   |               | CDNA FLJ11757 fis; clone HEMBA1005606                               | 0.2348 | 0.0359 |
| 232635_at   | C14orf145     | chromosome 14 open reading frame 145                                | 0.3504 | 0.0023 |
| 232641_at   | ZNF596        | zinc finger protein 596                                             | 0.7179 | 0.005  |
| 232644_x_at | OCIAD1        | OCIA domain containing 1                                            | 0.2594 | 0.0039 |
| 232645_at   | LOC153684     | hypothetical protein LOC153684                                      | 0.8621 | 0.0008 |
| 232648_at   | PSMA3         | proteasome (prosome; macropain) subunit; alpha type; 3              | 0.2717 | 0.0013 |
| 232661_s_at | DKFZP564O0523 | hypothetical protein DKFZp564O0523                                  | 0.4413 | 0.0324 |
| 232691_at   | SFXN5         | sideroflexin 5                                                      | 0.1771 | 0.0467 |
| 232693_s_at | FBXO16        | F-box protein 16, zinc finger protein 395                           | 0.9567 | 0.0152 |
| 232694_at   | ZNF395        | zinc finger protein 395                                             | 0.4902 | 0.0152 |
| 232696_at   | LOC648556     | uncharacterized gastric protein ZA43P                               | 0.3444 | 0.0074 |
| 232704_s_at | LRRFIP2       | leucine rich repeat (in FLII) interacting protein 2                 | 0.3181 | 0.0316 |

|             |               |                                                                                                                                                                                                                                                |        |        |
|-------------|---------------|------------------------------------------------------------------------------------------------------------------------------------------------------------------------------------------------------------------------------------------------|--------|--------|
| 232710_at   |               | CDNA FLJ11415 fis; clone HEMBA1000942                                                                                                                                                                                                          | 0.4533 | 0.001  |
| 232740_at   | MCM3APAS      | minichromosome maintenance complex component 3 associated protein antisense                                                                                                                                                                    | 0.7004 | 0.0367 |
| 232744_x_at |               | CDNA FLJ11681 fis; clone HEMBA1004865                                                                                                                                                                                                          | 0.8234 | 0.0486 |
| 232751_at   | RBBP9         | retinoblastoma binding protein 9                                                                                                                                                                                                               | 0.6755 | 0.0411 |
| 232753_at   | ZNF346        | zinc finger protein 346                                                                                                                                                                                                                        | 0.3377 | 0.008  |
| 232754_at   |               | CDNA FLJ11563 fis; clone HEMBA1003202                                                                                                                                                                                                          | 0.2814 | 0      |
| 232759_at   |               |                                                                                                                                                                                                                                                | 0.8584 | 0.0083 |
| 232760_at   | TEX15         | testis expressed 15                                                                                                                                                                                                                            | 0.7666 | 0.0463 |
| 232768_at   | CCNB2         | Cyclin B2                                                                                                                                                                                                                                      | 0.1685 | 0.0068 |
| 232772_at   | LOC221272     | hypothetical protein LOC221272                                                                                                                                                                                                                 | 0.1463 | 0.0458 |
| 232773_at   |               | CDNA: FLJ21440 fis; clone COL04389                                                                                                                                                                                                             | 1.1279 | 0.0144 |
| 232774_x_at | ZIK1          | zinc finger protein interacting with K protein 1 homolog (mouse)                                                                                                                                                                               | 0.4278 | 0.021  |
| 232778_at   |               | CDNA: FLJ22383 fis; clone HRC07564                                                                                                                                                                                                             | 0.5738 | 0.0043 |
| 232779_at   |               | CDNA FLJ20781 fis; clone COL04235                                                                                                                                                                                                              | 0.1157 | 0.0494 |
| 232784_at   |               | CDNA FLJ12405 fis; clone MAMMA1002838                                                                                                                                                                                                          | 0.3047 | 0.0155 |
| 232794_at   | LOC153682     | Hypothetical protein LOC153682                                                                                                                                                                                                                 | 0.5783 | 0.0002 |
| 232796_at   |               | CDNA FLJ11494 fis; clone HEMBA1001942                                                                                                                                                                                                          | 0.5397 | 0.0237 |
| 232801_at   | LOC375748     | RAD26L hypothetical protein                                                                                                                                                                                                                    | 0.2698 | 0.0089 |
| 232803_at   | FLJ31958      | hypothetical protein FLJ31958                                                                                                                                                                                                                  | 0.3176 | 0.0341 |
| 232805_at   |               | CDNA FLJ11973 fis; clone HEMBB1001221                                                                                                                                                                                                          | 1.6747 | 0.0179 |
| 232814_x_at | C14orf153     | Chromosome 14 open reading frame 153                                                                                                                                                                                                           | 0.3947 | 0.0081 |
| 232816_s_at | DDX11         | DEAD/H (Asp-Glu-Ala-Asp/His) box polypeptide 11 (CHL1-like helicase homolog; S. cerevisiae), DEAD/H (Asp-Glu-Ala-Asp/His) box polypeptide 11-like, DEAD/H (Asp-Glu-Ala-Asp/His) box polypeptide 12 (CHL1-like helicase homolog; S. cerevisiae) | 0.6154 | 0.0002 |
| 232822_x_at | MGC16121      | Hypothetical protein MGC16121                                                                                                                                                                                                                  | 0.515  | 0.0001 |
| 232826_at   |               | CDNA FLJ11400 fis; clone HEMBA1000673                                                                                                                                                                                                          | 0.3576 | 0.0049 |
| 232832_at   | DKFZp434J0226 | hypothetical gene DKFZp434J0226                                                                                                                                                                                                                | 0.4064 | 0.0431 |
| 232834_at   |               | CDNA FLJ11994 fis; clone HEMBB1001436                                                                                                                                                                                                          | 0.6414 | 0.0005 |
| 232859_s_at | MAGI1         | membrane associated guanylate kinase; WW and PDZ domain containing 1                                                                                                                                                                           | 0.4959 | 0.0012 |
| 232860_x_at | RBM41         | RNA binding motif protein 41                                                                                                                                                                                                                   | 0.5773 | 0.0153 |
| 232861_at   | PDP2          | pyruvate dehydrogenase phosphatase isoenzyme 2                                                                                                                                                                                                 | 1.3263 | 0.0066 |
| 232862_at   | ABHD5         | Abhydrolase domain containing 5                                                                                                                                                                                                                | 0.1148 | 0.0171 |

|             |           |                                                           |        |        |
|-------------|-----------|-----------------------------------------------------------|--------|--------|
| 232876_at   |           | CDNA: FLJ21881 fis; clone HEP02746                        | 0.639  | 0.0249 |
| 232879_at   | CRTC3     | CREB regulated transcription coactivator 3                | 0.6205 | 0.0285 |
| 232885_at   | LOC92482  | hypothetical protein LOC92482                             | 0.3922 | 0.0078 |
| 232886_at   |           | CDNA FLJ14179 fis; clone NT2RP2003668                     | 0.1171 | 0.0095 |
| 232889_at   | GUSBP1    | glucuronidase; beta pseudogene 1                          | 1.5256 | 0      |
| 232893_at   | LMBRD2    | LMBR1 domain containing 2                                 | 0.6808 | 0.0087 |
| 232896_at   | ERBB2IP   | ErbB2 interacting protein                                 | 0.4463 | 0.0005 |
| 232910_at   | LOC92482  | hypothetical protein LOC92482                             | 0.178  | 0.0103 |
| 232911_at   | ZFP14     | zinc finger protein 14 homolog (mouse)                    | 0.2602 | 0.0332 |
| 232912_at   | GPR180    | G protein-coupled receptor 180                            | 0.2902 | 0.0012 |
| 232918_at   | LOC541471 | Hypothetical LOC541471                                    | 0.477  | 0.0015 |
| 232931_at   | ASCC3L1   | activating signal cointegrator 1 complex subunit 3-like 1 | 0.6858 | 0.0159 |
| 232940_s_at | MLL3      | myeloid/lymphoid or mixed-lineage leukemia 3              | 0.7455 | 0.0157 |
| 232945_at   | CCDC139   | Coiled-coil domain containing 139                         | 0.1719 | 0.0206 |
| 232952_at   |           | CDNA FLJ11942 fis; clone HEMBB1000652                     | 0.2778 | 0.0245 |
| 232957_x_at |           | CDNA FLJ13017 fis; clone NT2RP3000628                     | 0.1674 | 0.013  |
| 232961_at   | LOC26010  | Viral DNA polymerase-transactivated protein 6             | 0.1472 | 0.0284 |
| 232962_x_at |           | CDNA FLJ34323 fis; clone FEBRA2008866                     | 0.1485 | 0.0321 |
| 232964_at   | WBSCR19   | Williams Beuren syndrome chromosome region 19             | 0.3852 | 0.0001 |
| 232968_at   | FANK1     | fibronectin type III and ankyrin repeat domains 1         | 1.2871 | 0.0057 |
| 232975_at   |           | Homo sapiens; clone IMAGE:6152133; mRNA                   | 0.4757 | 0.0373 |
| 232991_at   | ARL17     | ADP-ribosylation factor-like 17                           | 0.9839 | 0.0018 |
| 233003_at   |           | CDNA FLJ11942 fis; clone HEMBB1000652                     | 0.6023 | 0.0052 |
| 233013_x_at | LOC220906 | hypothetical protein LOC220906                            | 0.4647 | 0.0021 |
| 233014_at   |           | CDNA FLJ12918 fis; clone NT2RP2004580                     | 1.3598 | 0.0003 |
| 233017_x_at |           | CDNA FLJ12326 fis; clone MAMMA1002132                     | 0.2605 | 0.0152 |
| 233019_at   | CNOT7     | CCR4-NOT transcription complex; subunit 7                 | 0.9613 | 0.0005 |
| 233024_at   |           | CDNA FLJ11719 fis; clone HEMBA1005275                     | 0.4707 | 0.0379 |
| 233027_at   |           | CDNA FLJ12302 fis; clone MAMMA1001864                     | 0.3642 | 0.0014 |
| 233037_at   |           | Clone FLB2932 mRNA sequence                               | 0.6438 | 0.0325 |
| 233041_x_at |           | CDNA: FLJ21356 fis; clone COL02831                        | 0.2123 | 0.0475 |
| 233050_at   | C6orf174  | chromosome 6 open reading frame 174                       | 0.3968 | 0.0085 |
| 233053_at   |           | Transcribed locus                                         | 0.2744 | 0.0157 |
| 233056_x_at | DLGAP4    | discs; large (Drosophila) homolog-associated protein 4    | 0.442  | 0.0315 |

|             |          |                                                                         |        |        |
|-------------|----------|-------------------------------------------------------------------------|--------|--------|
| 233057_at   | HSPB8    | heat shock 22kDa protein 8                                              | 0.5872 | 0.0445 |
| 233070_at   | ZNF197   | zinc finger protein 197                                                 | 0.4639 | 0.0053 |
| 233080_s_at | PRPF40A  | PRP40 pre-mRNA processing factor 40 homolog A (S. cerevisiae)           | 0.434  | 0.0452 |
| 233081_at   |          | CDNA FLJ12305 fis; clone MAMMA1001890                                   | 0.2824 | 0.0164 |
| 233087_at   | FBXL17   | F-box and leucine-rich repeat protein 17                                | 0.6814 | 0.0038 |
| 233089_at   | QRSL1    | glutaminyl-tRNA synthase (glutamine-hydrolyzing)-like 1                 | 0.3596 | 0.041  |
| 233090_at   |          | CDNA FLJ11419 fis; clone HEMBA1000985                                   | 1.401  | 0.0378 |
| 233097_x_at |          | CDNA FLJ11133 fis; clone PLACE1006357                                   | 0.2472 | 0.0021 |
| 233099_at   |          | MRNA full length insert cDNA clone EUROIMAGE 2005220                    | 0.2051 | 0.0321 |
| 233101_at   | MTMR9    | myotubularin related protein 9                                          | 0.4713 | 0.0076 |
| 233106_at   | C14orf82 | chromosome 14 open reading frame 82                                     | 0.3623 | 0.0327 |
| 233110_s_at | BCL2L12  | BCL2-like 12 (proline rich)                                             | 1.0034 | 0.003  |
| 233115_at   |          | CDNA FLJ12950 fis; clone NT2RP2005454                                   | 0.1594 | 0.0075 |
| 233133_at   |          | Clone 24993 mRNA sequence                                               | 0.426  | 0.0309 |
| 233152_x_at |          | MRNA; cDNA DKFZp564C142 (from clone DKFZp564C142)                       | 0.3483 | 0.0376 |
| 233174_at   |          | CDNA clone IMAGE:5288145                                                | 0.2623 | 0.0037 |
| 233182_x_at | ATXN3    | Ataxin 3                                                                | 0.3067 | 0.0023 |
| 233187_s_at |          | Clone IMAGE:113308 mRNA sequence                                        | 0.15   | 0.0346 |
| 233198_at   | LOC92497 | hypothetical protein LOC92497                                           | 1.1011 | 0.0025 |
| 233214_at   |          | CDNA FLJ11900 fis; clone HEMBA1007341                                   | 0.7593 | 0.0022 |
| 233219_at   |          | CDNA FLJ13365 fis; clone PLACE1000332                                   | 0.5994 | 0.0167 |
| 233224_at   |          | MRNA; cDNA DKFZp586D0924 (from clone DKFZp586D0924)                     | 0.451  | 0.0243 |
| 233229_at   | SCFD1    | sec1 family domain containing 1                                         | 0.1795 | 0.0202 |
| 233230_s_at | SLAIN2   | SLAIN motif family; member 2                                            | 0.4118 | 0.0382 |
| 233231_at   | MCCC2    | Methylcrotonoyl-Coenzyme A carboxylase 2 (beta)                         | 0.9441 | 0.0006 |
| 233241_at   | C20orf19 | chromosome 20 open reading frame 19                                     | 0.8059 | 0.0011 |
| 233243_at   |          | CDNA FLJ11533 fis; clone HEMBA1002678                                   | 0.4871 | 0.0013 |
| 233251_at   | STRBP    | Spermatid perinuclear RNA binding protein                               | 0.2251 | 0.0197 |
| 233252_s_at | STRBP    | spermatid perinuclear RNA binding protein                               | 0.6206 | 0.0469 |
| 233254_x_at | PTEN     | phosphatase and tensin homolog (mutated in multiple advanced cancers 1) | 0.5039 | 0.037  |
| 233263_at   |          | CDNA FLJ12236 fis; clone MAMMA1001244                                   | 0.3564 | 0.0082 |
| 233270_x_at |          | CDNA FLJ12039 fis; clone HEMBB1001930                                   | 0.6565 | 0.0218 |
| 233271_at   |          | CDNA FLJ11709 fis; clone HEMBA1005133                                   | 0.943  | 0.0061 |

|             |           |                                                                                                                                                                                                    |        |        |
|-------------|-----------|----------------------------------------------------------------------------------------------------------------------------------------------------------------------------------------------------|--------|--------|
| 233284_at   |           | CDNA FLJ13318 fis; clone OVARC1001600                                                                                                                                                              | 0.6668 | 0      |
| 233288_at   | ATR       | ataxia telangiectasia and Rad3 related                                                                                                                                                             | 0.5141 | 0.0005 |
| 233290_at   |           | CDNA FLJ11451 fis; clone HEMBA1001433                                                                                                                                                              | 0.4625 | 0.0015 |
| 233292_s_at | ANKHD1    | MASK-4E-BP3 alternate reading frame gene, ankyrin repeat and KH domain containing 1                                                                                                                | 1.3666 | 0.0013 |
| 233295_at   |           | Pheromone receptor (PHRET) pseudogene; partial mRNA sequence                                                                                                                                       | 0.1309 | 0.0034 |
| 233300_at   |           | CDNA FLJ11548 fis; clone HEMBA1002944                                                                                                                                                              | 0.775  | 0.0366 |
| 233313_at   |           | CDNA FLJ14302 fis; clone PLACE2000003                                                                                                                                                              | 0.3236 | 0.0434 |
| 233319_x_at |           | CDNA FLJ13845 fis; clone THYRO1000815                                                                                                                                                              | 0.2629 | 0.0231 |
| 233334_x_at | GIYD1     | GIY-YIG domain containing 1, GIY-YIG domain containing 2, sulfotransferase family; cytosolic; 1A; phenol-preferring; member 3, sulfotransferase family; cytosolic; 1A; phenol-preferring; member 4 | 0.6438 | 0.0082 |
| 233337_s_at | SEZ6L2    | seizure related 6 homolog (mouse)-like 2                                                                                                                                                           | 1.2227 | 0.0216 |
| 233340_at   | SPINK5L3  | serine PI Kazal type 5-like 3                                                                                                                                                                      | 3.4235 | 0.0001 |
| 233366_at   | FBXO4     | F-box protein 4                                                                                                                                                                                    | 0.2018 | 0.0015 |
| 233369_at   |           | CDNA FLJ11835 fis; clone HEMBA1006595                                                                                                                                                              | 1.1476 | 0.0029 |
| 233376_at   |           | G protein interaction factor 2-like mRNA sequence                                                                                                                                                  | 0.2992 | 0.0091 |
| 233399_x_at | LOC441383 | Hypothetical gene supported by AF086559; BC065734                                                                                                                                                  | 0.4046 | 0.0072 |
| 233405_at   |           | CDNA FLJ13333 fis; clone OVARC1001828                                                                                                                                                              | 0.5291 | 0.0216 |
| 233415_at   |           | Clone IMAGE:246773; mRNA sequence                                                                                                                                                                  | 0.1857 | 0.0123 |
| 233417_at   |           | CDNA FLJ11625 fis; clone HEMBA1004200                                                                                                                                                              | 0.5918 | 0.0062 |
| 233423_at   | KIAA1609  | KIAA1609                                                                                                                                                                                           | 0.3073 | 0.0025 |
| 233428_at   |           | CDNA: FLJ22144 fis; clone HEP21732                                                                                                                                                                 | 0.2808 | 0.0001 |
| 233431_x_at |           | Breast cancer estrogen-induced apoptosis 3 mRNA sequence                                                                                                                                           | 0.4683 | 0.003  |
| 233436_at   | MTBP      | Mdm2; transformed 3T3 cell double minute 2; p53 binding protein (mouse) binding protein; 104kDa                                                                                                    | 0.519  | 0.0021 |
| 233438_at   |           | CDNA FLJ14068 fis; clone HEMBB1001500                                                                                                                                                              | 0.2464 | 0.0428 |
| 233440_at   |           | CDNA FLJ12367 fis; clone MAMMA1002413                                                                                                                                                              | 0.6034 | 0.0123 |
| 233445_at   |           | Transcribed locus                                                                                                                                                                                  | 0.8018 | 0.0012 |
| 233461_x_at | ZNF226    | zinc finger protein 226                                                                                                                                                                            | 1.4072 | 0      |
| 233465_at   |           | CDNA FLJ11300 fis; clone PLACE1009886                                                                                                                                                              | 0.1317 | 0.0168 |
| 233518_at   |           | CDNA FLJ11493 fis; clone HEMBA1001940                                                                                                                                                              | 0.7786 | 0.0013 |
| 233532_x_at | IFT52     | intraflagellar transport 52 homolog (Chlamydomonas)                                                                                                                                                | 0.223  | 0.0484 |

|             |           |                                                                   |        |        |
|-------------|-----------|-------------------------------------------------------------------|--------|--------|
| 233539_at   | NAPE-PLD  | N-acyl-phosphatidylethanolamine-hydrolyzing phospholipase D       | 1.0982 | 0.0007 |
| 233548_at   |           | Clone IMAGE:35115; mRNA sequence                                  | 0.2269 | 0.0053 |
| 233555_s_at | SULF2     | sulfatase 2                                                       | 3.4706 | 0      |
| 233557_s_at | MON1B     | MON1 homolog B (yeast)                                            | 0.7483 | 0.0015 |
| 233571_x_at | C20orf149 | chromosome 20 open reading frame 149                              | 0.7293 | 0.0091 |
| 233579_at   |           | CDNA: FLJ22749 fis; clone KAIA0458                                | 0.2224 | 0.0067 |
| 233596_at   |           | Clone FLB2543                                                     | 0.5475 | 0.0322 |
| 233605_x_at | HNRPM     | heterogeneous nuclear ribonucleoprotein M                         | 0.1478 | 0.0229 |
| 233620_at   | ARHGEF12  | Rho guanine nucleotide exchange factor (GEF) 12                   | 0.1051 | 0.0245 |
| 233630_at   | CDS2      | CDP-diaclylglycerol synthase (phosphatidate cytidyltransferase) 2 | 0.289  | 0.0152 |
| 233635_at   |           | MRNA; cDNA DKFZp564G212 (from clone DKFZp564G212)                 | 0.3109 | 0.0003 |
| 233637_at   | WDR42A    | WD repeat domain 42A                                              | 0.5153 | 0.0178 |
| 233655_s_at | FAM29A    | family with sequence similarity 29; member A                      | 0.7559 | 0.0025 |
| 233658_at   |           |                                                                   | 0.4083 | 0.0011 |
| 233664_at   |           | CDNA: FLJ22803 fis; clone KAIA2685                                | 0.4162 | 0.0099 |
| 233678_at   |           |                                                                   | 0.2807 | 0.0307 |
| 233702_x_at |           | CDNA: FLJ20946 fis; clone ADSE01819                               | 0.3962 | 0.005  |
| 233713_at   |           | CDNA FLJ12119 fis; clone MAMMA1000092                             | 1.9986 | 0.0016 |
| 233732_at   | LOC222159 | Hypothetical protein LOC222159                                    | 0.3795 | 0.0119 |
| 233742_at   | C16orf68  | Chromosome 16 open reading frame 68                               | 0.342  | 0.0017 |
| 233750_s_at | C1orf25   | chromosome 1 open reading frame 25                                | 0.6397 | 0.0329 |
| 233775_x_at |           | CDNA FLJ13242 fis; clone OVARC1000578                             | 0.3161 | 0.0348 |
| 233786_at   |           | CDNA FLJ10171 fis; clone HEMBA1003807                             | 0.113  | 0.0469 |
| 233799_at   |           | CDNA FLJ11418 fis; clone HEMBA1000972                             | 0.8605 | 0.0187 |
| 233807_at   | ASB7      | ankyrin repeat and SOCS box-containing 7                          | 0.1973 | 0.009  |
| 233808_at   |           | CDNA FLJ11984 fis; clone HEMBB1001348                             | 0.205  | 0.0306 |
| 233818_at   | ZNF294    | zinc finger protein 294                                           | 0.1058 | 0.0229 |
| 233819_s_at | ZNF294    | zinc finger protein 294                                           | 0.8157 | 0.0303 |
| 233827_s_at | SUPT16H   | suppressor of Ty 16 homolog (S. cerevisiae)                       | 1.1478 | 0.0062 |
| 233834_at   |           | CDNA: FLJ21392 fis; clone COL03505                                | 0.3627 | 0.0352 |
| 233836_at   | TNRC6A    | trinucleotide repeat containing 6A                                | 0.3136 | 0.0061 |
| 233841_s_at | SUDS3     | suppressor of defective silencing 3 homolog (S. cerevisiae)       | 0.7766 | 0.0012 |
| 233852_at   | POLH      | polymerase (DNA directed); eta                                    | 0.461  | 0.0139 |

|             |               |                                                                                                                                                                    |        |        |
|-------------|---------------|--------------------------------------------------------------------------------------------------------------------------------------------------------------------|--------|--------|
| 233864_s_at | VPS35         | vacuolar protein sorting 35 homolog (S. cerevisiae)                                                                                                                | 0.4737 | 0.0009 |
| 233869_x_at | DKFZP586B0319 | DKFZP586B0319 protein                                                                                                                                              | 0.7341 | 0.0354 |
| 233870_at   | NAV1          | neuron navigator 1                                                                                                                                                 | 0.2302 | 0.0379 |
| 233873_x_at | PAPD1         | PAP associated domain containing 1                                                                                                                                 | 0.6141 | 0.0164 |
| 233874_at   | SLAIN2        | SLAIN motif family; member 2                                                                                                                                       | 0.548  | 0.0082 |
| 233882_s_at | SEMA6D        | sema domain; transmembrane domain (TM); and cytoplasmic domain; (semaphorin) 6D                                                                                    | 0.3622 | 0.0273 |
| 233884_at   |               | Homo sapiens; clone IMAGE:5180231; mRNA                                                                                                                            | 0.344  | 0.0144 |
| 233908_x_at |               | CDNA FLJ12050 fis; clone HEMBB1002002                                                                                                                              | 0.8016 | 0.016  |
| 233912_x_at |               | CDNA FLJ11463 fis; clone HEMBA1001608                                                                                                                              | 0.3044 | 0.0342 |
| 233929_x_at | FAM39DP       | CXYorf1-related protein, family with sequence similarity 39; member D pseudogene, family with sequence similarity 39; member E, similar to CXYorf1-related protein | 0.4728 | 0.0176 |
| 233940_at   |               | CDNA FLJ12739 fis; clone NT2RP2000498                                                                                                                              | 0.4111 | 0.0403 |
| 233945_at   | UGCGL2        | UDP-glucose ceramide glucosyltransferase-like 2                                                                                                                    | 0.2067 | 0.0368 |
| 233995_at   |               | Clone HQ0663 PRO0663                                                                                                                                               | 1.887  | 0      |
| 233999_s_at | TTC26         | tetratricopeptide repeat domain 26                                                                                                                                 | 0.8222 | 0.0006 |
| 234001_s_at | ARFGAP1       | ADP-ribosylation factor GTPase activating protein 1                                                                                                                | 0.7921 | 0.0112 |
| 234020_x_at |               | CDNA clone IMAGE:4698949                                                                                                                                           | 0.2814 | 0.0011 |
| 234032_at   |               | PRO1550                                                                                                                                                            | 1.2629 | 0.0069 |
| 234033_at   |               | Clone IMAGE:110218 mRNA sequence                                                                                                                                   | 0.3854 | 0.0304 |
| 234040_at   | HELLS         | helicase; lymphoid-specific                                                                                                                                        | 0.2485 | 0.0016 |
| 234042_at   | TAS2R45       | taste receptor; type 2; member 45                                                                                                                                  | 0.4599 | 0.0168 |
| 234059_at   |               | CDNA FLJ12093 fis; clone HEMBB1002603                                                                                                                              | 0.2788 | 0.0039 |
| 234075_at   |               | CDNA FLJ11204 fis; clone PLACE1007810                                                                                                                              | 0.1201 | 0.0156 |
| 234082_at   |               | CDNA FLJ11831 fis; clone HEMBA1006562                                                                                                                              | 1.8652 | 0.0105 |
| 234084_x_at |               | CDNA FLJ12075 fis; clone HEMBB1002425                                                                                                                              | 0.4613 | 0.0061 |
| 234096_at   |               | CDNA FLJ13767 fis; clone PLACE4000147                                                                                                                              | 0.1699 | 0.0173 |
| 234098_at   | SOBP          | Sine oculis binding protein homolog (Drosophila)                                                                                                                   | 0.6822 | 0.0208 |
| 234106_s_at | FLYWCH1       | FLYWCH-type zinc finger 1                                                                                                                                          | 0.6328 | 0.0361 |
| 234111_at   | ZNF81         | Zinc finger protein 81                                                                                                                                             | 0.557  | 0.0399 |
| 234140_s_at | STIM2         | stromal interaction molecule 2                                                                                                                                     | 0.5052 | 0.0024 |
| 234182_at   |               |                                                                                                                                                                    | 0.2566 | 0.0024 |
| 234196_at   |               | CDNA: FLJ21377 fis; clone COL03255                                                                                                                                 | 0.2696 | 0.0365 |
| 234210_x_at | ACTR2         | ARP2 actin-related protein 2 homolog (yeast)                                                                                                                       | 0.3514 | 0.0068 |



|             |           |                                                                                                                  |        |        |
|-------------|-----------|------------------------------------------------------------------------------------------------------------------|--------|--------|
| 234235_at   |           | MRNA; cDNA DKFZp761I2114 (from clone DKFZp761I2114)                                                              | 0.1182 | 0.02   |
| 234245_at   |           | MRNA; cDNA DKFZp761M2223 (from clone DKFZp761M2223)                                                              | 0.7857 | 0.0266 |
| 234260_at   |           | MRNA; cDNA DKFZp434E0572 (from clone DKFZp434E0572)                                                              | 0.6143 | 0.0077 |
| 234294_x_at | GATAD2A   | GATA zinc finger domain containing 2A                                                                            | 0.5883 | 0.0168 |
| 234295_at   | DBR1      | debranching enzyme homolog 1 ( <i>S. cerevisiae</i> )                                                            | 0.4792 | 0.031  |
| 234299_s_at | NIN       | ninein (GSK3B interacting protein)                                                                               | 0.4838 | 0.0051 |
| 234304_s_at | IPO11     | importin 11                                                                                                      | 0.6669 | 0.0325 |
| 234311_s_at | GTPBP10   | GTP-binding protein 10 (putative)                                                                                | 1.0436 | 0.0021 |
| 234326_at   |           | CDNA: FLJ21248 fis; clone COL01235                                                                               | 0.2965 | 0.0132 |
| 234341_x_at | LOC91548  | hypothetical protein LOC91548                                                                                    | 0.6855 | 0      |
| 234344_at   | RAP2C     | RAP2C; member of RAS oncogene family                                                                             | 0.5055 | 0.0118 |
| 234346_x_at |           | CDNA FLJ11369 fis; clone HEMBA1000338                                                                            | 0.1523 | 0.005  |
| 234423_x_at |           | CDNA clone IMAGE:4814259                                                                                         | 0.3117 | 0.0168 |
| 234428_at   |           | MRNA; cDNA DKFZp564I1316 (from clone DKFZp564I1316)                                                              | 0.1072 | 0.0046 |
| 234432_at   |           | Metastasis related protein (MB2)                                                                                 | 0.1182 | 0.0303 |
| 234445_at   | C6orf12   | chromosome 6 open reading frame 12                                                                               | 0.3372 | 0.0101 |
| 234459_at   | PPHLN1    | periphilin 1                                                                                                     | 0.2689 | 0.0365 |
| 234488_s_at | GMCL1     | germ cell-less homolog 1 ( <i>Drosophila</i> )                                                                   | 0.5409 | 0.0041 |
| 234491_s_at | SAV1      | salvador homolog 1 ( <i>Drosophila</i> )                                                                         | 0.4162 | 0.0393 |
| 234549_at   |           | MRNA; cDNA DKFZp586G1917 (from clone DKFZp586G1917)                                                              | 0.1089 | 0.0309 |
| 234562_x_at | LOC728678 | hypothetical protein LOC728678, hypothetical protein LOC731914                                                   | 0.8224 | 0.0022 |
| 234578_at   |           | MRNA; cDNA DKFZp434E1812 (from clone DKFZp434E1812)                                                              | 0.1859 | 0.0117 |
| 234604_at   |           | CDNA: FLJ21228 fis; clone COL00739                                                                               | 0.8269 | 0.003  |
| 234628_at   |           | CDNA: FLJ23374 fis; clone HEP16126                                                                               | 0.2396 | 0.0026 |
| 234643_x_at |           | CDNA: FLJ21798 fis; clone HEP00573                                                                               | 1.7766 | 0.0113 |
| 234654_at   |           | CDNA: FLJ23314 fis; clone HEP11989                                                                               | 0.2198 | 0.0083 |
| 234672_s_at | TMEM48    | transmembrane protein 48                                                                                         | 0.4994 | 0.0469 |
| 234675_x_at |           | CDNA: FLJ23566 fis; clone LNG10880                                                                               | 0.3631 | 0.014  |
| 234697_x_at | C3orf31   | chromosome 3 open reading frame 31                                                                               | 0.2691 | 0.0076 |
| 234701_at   | ANKRD11   | ankyrin repeat domain 11                                                                                         | 0.5486 | 0.0035 |
| 234723_x_at |           | CDNA: FLJ21228 fis; clone COL00739                                                                               | 0.9422 | 0.0002 |
| 234725_s_at | SEMA4B    | sema domain; immunoglobulin domain (Ig); transmembrane domain (TM) and short cytoplasmic domain; (semaphorin) 4B | 0.8094 | 0.0279 |
| 234726_s_at | TMEM168   | transmembrane protein 168                                                                                        | 0.9163 | 0.0026 |

|             |           |                                                                                                                                  |        |        |
|-------------|-----------|----------------------------------------------------------------------------------------------------------------------------------|--------|--------|
| 234728_s_at | DHX35     | DEAH (Asp-Glu-Ala-His) box polypeptide 35                                                                                        | 0.5436 | 0.019  |
| 234731_at   |           | CDNA FLJ12366 fis; clone MAMMA1002411                                                                                            | 0.3377 | 0.0131 |
| 234733_s_at | FANCM     | Fanconi anemia; complementation group M                                                                                          | 0.8829 | 0.0029 |
| 234749_s_at | WDR51A    | WD repeat domain 51A                                                                                                             | 0.4257 | 0.0047 |
| 234762_x_at | NLN       | Neurolysin (metallopeptidase M3 family)                                                                                          | 0.5918 | 0.0024 |
| 234788_x_at |           | CDNA: FLJ21166 fis; clone CAS10851                                                                                               | 0.8169 | 0.0003 |
| 234801_s_at | ACSS1     | acyl-CoA synthetase short-chain family member 1                                                                                  | 0.6111 | 0.0105 |
| 234805_at   |           | TNF receptor homolog                                                                                                             | 0.1393 | 0.0102 |
| 234825_at   |           | MRNA; cDNA DKFZp434P1019 (from clone DKFZp434P1019)                                                                              | 0.1348 | 0.0113 |
| 234863_x_at | FBXO5     | F-box protein 5                                                                                                                  | 1.0697 | 0.014  |
| 234907_x_at |           | Mutant DNA polymerase beta                                                                                                       | 0.1667 | 0.0132 |
| 234915_s_at | DENR      | density-regulated protein                                                                                                        | 1.0236 | 0.0059 |
| 234921_at   | ZNF470    | zinc finger protein 470                                                                                                          | 0.3026 | 0.0173 |
| 234941_s_at | GPHN      | gephyrin                                                                                                                         | 0.3648 | 0.0331 |
| 234944_s_at | FAM54A    | family with sequence similarity 54; member A                                                                                     | 0.7471 | 0.001  |
| 234945_at   | FAM54A    | family with sequence similarity 54; member A                                                                                     | 0.2693 | 0.0001 |
| 234949_at   | C20orf80  | Chromosome 20 open reading frame 80                                                                                              | 1.2721 | 0      |
| 234953_x_at | ZNF19     | zinc finger protein 19                                                                                                           | 0.5707 | 0      |
| 234954_at   | LOC442262 | similar to Glyceraldehyde-3-phosphate dehydrogenase (GAPDH)                                                                      | 0.9354 | 0.0005 |
| 234976_x_at | SLC4A5    | Solute carrier family 4; sodium bicarbonate cotransporter; member 5                                                              | 0.3229 | 0.0001 |
| 234977_at   | ZADH2     | zinc binding alcohol dehydrogenase; domain containing 2                                                                          | 0.3915 | 0.0075 |
| 234979_at   | BCDIN3D   | BCDIN3 domain containing                                                                                                         | 0.5873 | 0.0164 |
| 234981_x_at | CMBL      | carboxymethylenebutenolidase homolog (Pseudomonas)                                                                               | 0.3492 | 0.0017 |
| 234983_at   |           | Transcribed locus                                                                                                                | 1.1792 | 0      |
| 234984_at   | NEDD1     | neural precursor cell expressed; developmentally down-regulated 1                                                                | 0.9888 | 0      |
| 234988_at   | VCPIP1    | valosin containing protein (p97)/p47 complex interacting protein 1                                                               | 0.3252 | 0.0383 |
| 234990_at   |           | CDNA clone IMAGE:4842353                                                                                                         | 0.4301 | 0.0413 |
| 234991_at   |           | Transcribed locus; strongly similar to XP_001111447.1 transforming growth factor; beta-induced; 68kDa isoform 6 [Macaca mulatta] | 0.572  | 0.0274 |
| 234992_x_at | ECT2      | epithelial cell transforming sequence 2 oncogene                                                                                 | 0.7837 | 0.0064 |
| 234995_at   | CCDC52    | coiled-coil domain containing 52                                                                                                 | 0.908  | 0.0069 |
| 235003_at   | UHMK1     | U2AF homology motif (UHM) kinase 1                                                                                               | 0.8124 | 0.0251 |
| 235008_at   |           | CDNA FLJ25241 fis; clone STM02689                                                                                                | 0.9351 | 0.0223 |

|             |              |                                                                                                         |        |        |
|-------------|--------------|---------------------------------------------------------------------------------------------------------|--------|--------|
| 235009_at   | FAM44A       | family with sequence similarity 44; member A                                                            | 0.9547 | 0.003  |
| 235023_at   | VPS13C       | Vacuolar protein sorting 13 homolog C (S. cerevisiae)                                                   | 1.1031 | 0.0003 |
| 235025_at   | WDR89        | WD repeat domain 89                                                                                     | 0.7812 | 0.0105 |
| 235026_at   | FLJ32549     | hypothetical protein FLJ32549                                                                           | 1.113  | 0.0033 |
| 235028_at   |              | CDNA FLJ42313 fis; clone TRACH2019425                                                                   | 1.1965 | 0.002  |
| 235029_at   | GIN54        | GIN5 complex subunit 4 (Sid5 homolog)                                                                   | 0.2514 | 0.0007 |
| 235030_at   | FAM55C       | family with sequence similarity 55; member C                                                            | 0.8834 | 0.0045 |
| 235032_at   | DNAJA5       | DnaJ homology subfamily A member 5                                                                      | 0.3977 | 0.0441 |
| 235035_at   | SLC35E1      | solute carrier family 35; member E1                                                                     | 0.9278 | 0.0004 |
| 235039_x_at | LIN9         | lin-9 homolog (C. elegans)                                                                              | 0.718  | 0.0099 |
| 235060_at   | DKFZp547E087 | hypothetical gene LOC283846                                                                             | 2.2756 | 0      |
| 235061_at   | PPM1K        | protein phosphatase 1K (PP2C domain containing)                                                         | 0.7408 | 0.0215 |
| 235079_at   |              | Transcribed locus                                                                                       | 1.1659 | 0.0054 |
| 235088_at   | LOC201725    | hypothetical protein LOC201725                                                                          | 2.5061 | 0      |
| 235113_at   | PPIL5        | peptidylprolyl isomerase (cyclophilin)-like 5                                                           | 1.2726 | 0.0004 |
| 235115_at   | PDE8B        | phosphodiesterase 8B                                                                                    | 0.3796 | 0.0099 |
| 235120_at   | SEC22C       | SEC22 vesicle trafficking protein homolog C (S. cerevisiae)                                             | 0.1627 | 0.023  |
| 235123_at   |              | Transcribed locus                                                                                       | 1.7835 | 0      |
| 235130_at   | PANK2        | Pantothenate kinase 2 (Hallervorden-Spatz syndrome)                                                     | 0.3056 | 0.0379 |
| 235146_at   |              | Transcribed locus                                                                                       | 1.291  | 0.003  |
| 235147_at   |              | CDNA FLJ39330 fis; clone OCBBF2016405                                                                   | 0.8034 | 0.0417 |
| 235152_at   |              | Homo sapiens; clone IMAGE:5218412; mRNA                                                                 | 1.3381 | 0.0004 |
| 235161_at   |              | Homo sapiens; clone IMAGE:3632683; mRNA                                                                 | 0.2217 | 0.0313 |
| 235167_at   | DKFZp547E087 | hypothetical gene LOC283846                                                                             | 1.4722 | 0.0001 |
| 235170_at   | ZNF92        | zinc finger protein 92                                                                                  | 1.2016 | 0.0032 |
| 235172_at   |              | Transcribed locus                                                                                       | 0.4052 | 0.0374 |
| 235174_s_at |              | CDNA clone IMAGE:5286843                                                                                | 0.9824 | 0.015  |
| 235176_at   | ZNF545       | zinc finger protein 545                                                                                 | 0.7132 | 0.0148 |
| 235178_x_at | ESCO2        | establishment of cohesion 1 homolog 2 (S. cerevisiae)                                                   | 0.3021 | 0.0025 |
| 235179_at   | ZNF641       | zinc finger protein 641                                                                                 | 0.779  | 0.0473 |
| 235180_at   | LOC730432    | serine/threonine/tyrosine interacting protein, similar to serine/threonine/tyrosine interacting protein | 0.1946 | 0.0456 |
| 235182_at   | C20orf82     | chromosome 20 open reading frame 82                                                                     | 1.9259 | 0.044  |
| 235189_at   | NARG2        | NMDA receptor regulated 2                                                                               | 0.7535 | 0.0067 |
| 235191_at   | LOC148189    | Hypothetical protein LOC148189                                                                          | 0.4297 | 0.0443 |
| 235200_at   | ZNF561       | zinc finger protein 561                                                                                 | 0.578  | 0.0215 |

|             |               |                                                                                   |        |        |
|-------------|---------------|-----------------------------------------------------------------------------------|--------|--------|
| 235202_x_at | IKIP          | IKK interacting protein                                                           | 1.4565 | 0.0001 |
| 235205_at   | LOC346887     | similar to solute carrier family 16 (monocarboxylic acid transporters); member 14 | 1.1274 | 0.0452 |
| 235216_at   | ESCO1         | establishment of cohesion 1 homolog 1 (S. cerevisiae)                             | 0.4063 | 0.0127 |
| 235217_at   |               | CDNA clone IMAGE:5302680                                                          | 0.5587 | 0.005  |
| 235219_at   | LOC116349     | hypothetical protein BC014011                                                     | 0.397  | 0.0364 |
| 235222_x_at | BIRC4         | baculoviral IAP repeat-containing 4                                               | 0.6709 | 0.0116 |
| 235226_at   | CDC2L6        | cell division cycle 2-like 6 (CDK8-like)                                          | 1.0251 | 0.0005 |
| 235234_at   | FLJ36874      | FLJ36874 protein                                                                  | 0.6106 | 0.0146 |
| 235239_at   | QSOX2         | quiescin Q6 sulfhydryl oxidase 2                                                  | 0.3664 | 0.0058 |
| 235241_at   | FLJ90709      | hypothetical protein FLJ90709                                                     | 1.61   | 0      |
| 235253_at   | RAD1          | RAD1 homolog (S. pombe)                                                           | 0.741  | 0.0272 |
| 235255_at   | ATP6V0A2      | ATPase; H+ transporting; lysosomal V0 subunit a2                                  | 0.4396 | 0.0058 |
| 235258_at   | DCP2          | DCP2 decapping enzyme homolog (S. cerevisiae)                                     | 0.9524 | 0.0045 |
| 235263_at   | DKFZP434A0131 | DKFZp434A0131 protein                                                             | 0.724  | 0.001  |
| 235266_at   | ATAD2         | ATPase family; AAA domain containing 2                                            | 0.7147 | 0.0105 |
| 235273_at   | DYX1C1        | dyslexia susceptibility 1 candidate 1                                             | 0.3642 | 0.0301 |
| 235286_at   |               | Transcribed locus                                                                 | 1.0688 | 0.0014 |
| 235287_at   | CDK6          | cyclin-dependent kinase 6                                                         | 0.6288 | 0.0246 |
| 235288_at   |               | Transcribed locus                                                                 | 0.43   | 0.0028 |
| 235290_at   | ZNF782        | Zinc finger protein 782                                                           | 0.6156 | 0.0017 |
| 235294_at   | SIKE          | suppressor of IKK epsilon                                                         | 0.7657 | 0.0043 |
| 235302_at   |               | Full-length cDNA clone CS0CAP006YP08 of Thymus of Homo sapiens (human)            | 0.6084 | 0.0237 |
| 235304_at   |               | Transcribed locus                                                                 | 0.4639 | 0.042  |
| 235311_at   | FKBP14        | FK506 binding protein 14; 22 kDa                                                  | 0.8945 | 0.0006 |
| 235320_at   | ARL6          | ADP-ribosylation factor-like 6                                                    | 0.654  | 0.0173 |
| 235321_at   |               | Transcribed locus                                                                 | 0.4149 | 0.0144 |
| 235322_at   |               |                                                                                   | 0.6744 | 0.0074 |
| 235327_x_at | UBXD4         | UBX domain containing 4                                                           | 0.4627 | 0.0018 |
| 235328_at   | PLXNC1        | Plexin C1                                                                         | 0.4158 | 0.0154 |
| 235343_at   |               |                                                                                   | 0.539  | 0.0267 |
| 235345_at   | RUFY2         | RUN and FYVE domain containing 2                                                  | 0.1964 | 0.0177 |
| 235354_s_at | RSRC1         | Arginine/serine-rich coiled-coil 1                                                | 0.2877 | 0.0113 |
| 235363_at   |               | Transcribed locus                                                                 | 1.2231 | 0.0175 |
| 235369_at   | C14orf28      | chromosome 14 open reading frame 28                                               | 0.5055 | 0.0178 |
| 235374_at   | MDH1          | Malate dehydrogenase 1; NAD (soluble)                                             | 1.9312 | 0      |
| 235387_at   | GSTCD         | glutathione S-transferase; C-terminal domain containing                           | 0.8841 | 0.0001 |

|             |          |                                                                                                                                                         |        |        |
|-------------|----------|---------------------------------------------------------------------------------------------------------------------------------------------------------|--------|--------|
| 235388_at   | CHD9     | chromodomain helicase DNA binding protein 9                                                                                                             | 1.2382 | 0.0027 |
| 235390_at   | P18SRP   | P18SRP protein                                                                                                                                          | 1.2354 | 0.0035 |
| 235406_x_at |          | CDNA clone IMAGE:4814828                                                                                                                                | 0.7997 | 0.0069 |
| 235409_at   | MGA      | MAX gene associated                                                                                                                                     | 0.9646 | 0.0025 |
| 235411_at   | PGBD1    | piggyBac transposable element derived 1                                                                                                                 | 0.4717 | 0.0016 |
| 235412_at   | ARHGEF7  | Rho guanine nucleotide exchange factor (GEF) 7                                                                                                          | 0.5736 | 0.0113 |
| 235414_at   | ZNF383   | zinc finger protein 383                                                                                                                                 | 0.3272 | 0.0399 |
| 235422_at   |          | Full-length cDNA clone CS0DB008YK14 of Neuroblastoma Cot 10-normalized of Homo sapiens (human)                                                          | 0.4621 | 0.0083 |
| 235425_at   | SGOL2    | shugoshin-like 2 (S. pombe)                                                                                                                             | 2.0245 | 0.0003 |
| 235435_at   | AASDH    | 2-aminoadipic 6-semialdehyde dehydrogenase                                                                                                              | 0.8096 | 0.048  |
| 235441_at   |          | CDNA FLJ46476 fis; clone THYMU3024879                                                                                                                   | 0.247  | 0.046  |
| 235444_at   | FOXP1    | forkhead box P1                                                                                                                                         | 0.6906 | 0.0082 |
| 235447_at   | TRUB1    | TruB pseudouridine (psi) synthase homolog 1 (E. coli)                                                                                                   | 0.7102 | 0.0328 |
| 235452_at   |          | Transcribed locus                                                                                                                                       | 0.8192 | 0.0071 |
| 235453_at   | TOR1AIP2 | torsin A interacting protein 2                                                                                                                          | 0.4333 | 0.0287 |
| 235455_at   | FAM131C  | family with sequence similarity 131; member C                                                                                                           | 0.5056 | 0.0028 |
| 235456_at   |          | CDNA clone IMAGE:4819084                                                                                                                                | 1.2275 | 0.011  |
| 235469_at   | FAM133B  | family with sequence similarity 133; member B, hypothetical protein LOC728153, hypothetical protein LOC728408, hypothetical protein MGC40405 pseudogene | 1.0035 | 0.0005 |
| 235470_at   |          | Transcribed locus                                                                                                                                       | 1.4399 | 0      |
| 235473_at   | MED6     | Mediator of RNA polymerase II transcription; subunit 6 homolog (S. cerevisiae)                                                                          | 0.8201 | 0.0407 |
| 235476_at   | TRIM59   | tripartite motif-containing 59                                                                                                                          | 0.5271 | 0.0109 |
| 235478_at   | DCLRE1C  | DNA cross-link repair 1C (PSO2 homolog; S. cerevisiae)                                                                                                  | 0.4801 | 0.0449 |
| 235484_at   | PTAR1    | protein prenyltransferase alpha subunit repeat containing 1                                                                                             | 1.3694 | 0.0001 |
| 235486_at   | C11orf41 | chromosome 11 open reading frame 41                                                                                                                     | 0.8757 | 0.0204 |
| 235487_at   |          | Transcribed locus; strongly similar to XP_001154344.1 hypothetical protein [Pan troglodytes]                                                            | 0.1796 | 0.0121 |
| 235506_at   |          | Periodontal ligament cell specific protein 2 mRNA; partial sequence                                                                                     | 0.2308 | 0.03   |
| 235508_at   | PML      | promyelocytic leukemia                                                                                                                                  | 0.3693 | 0.0031 |
| 235511_at   |          | CDNA FLJ36727 fis; clone UTERU2012286                                                                                                                   | 0.3602 | 0.0411 |
| 235516_at   | SEPSECS  | Sep (O-phosphoserine) tRNA:Sec (selenocysteine) tRNA synthase                                                                                           | 0.3187 | 0.0011 |
| 235532_at   |          | CDNA clone IMAGE:5302913                                                                                                                                | 0.5062 | 0.0485 |
| 235533_at   | COX19    | COX19 cytochrome c oxidase assembly homolog (S. cerevisiae)                                                                                             | 0.5598 | 0.0055 |

|             |           |                                                                                                                                                                               |        |        |
|-------------|-----------|-------------------------------------------------------------------------------------------------------------------------------------------------------------------------------|--------|--------|
| 235537_at   | OCIAD1    | OCIA domain containing 1                                                                                                                                                      | 0.2708 | 0.0495 |
| 235540_at   | GNRH1     | gonadotropin-releasing hormone 1 (luteinizing-releasing hormone)                                                                                                              | 0.266  | 0.006  |
| 235545_at   | DEPDC1    | DEP domain containing 1                                                                                                                                                       | 1.7105 | 0.0007 |
| 235551_at   | WDR4      | WD repeat domain 4                                                                                                                                                            | 0.3305 | 0.0017 |
| 235555_at   |           | Transcribed locus; weakly similar to XP_001077486.1 hypothetical protein [Rattus norvegicus]                                                                                  | 0.6972 | 0.0054 |
| 235572_at   | SPC24     | SPC24; NDC80 kinetochore complex component; homolog (S. cerevisiae)                                                                                                           | 0.4696 | 0.003  |
| 235587_at   | LOC202781 | hypothetical protein LOC202781                                                                                                                                                | 0.709  | 0.0167 |
| 235588_at   | ESCO2     | establishment of cohesion 1 homolog 2 (S. cerevisiae)                                                                                                                         | 0.2906 | 0.0345 |
| 235594_at   | SCYE1     | Small inducible cytokine subfamily E; member 1 (endothelial monocyte-activating)                                                                                              | 0.3256 | 0.0029 |
| 235601_at   |           | Transcribed locus                                                                                                                                                             | 0.7957 | 0.0103 |
| 235604_x_at | ZNF493    | zinc finger protein 493                                                                                                                                                       | 0.5551 | 0.0216 |
| 235606_at   | LOC344595 | hypothetical LOC344595                                                                                                                                                        | 0.7325 | 0.0205 |
| 235607_at   |           | Transcribed locus; strongly similar to XP_517193.1 similar to Heterogeneous nuclear ribonucleoprotein D0 (hnRNP D0) (AU-rich element RNA-binding protein 1) [Pan troglodytes] | 0.5115 | 0.0004 |
| 235609_at   |           | Transcribed locus                                                                                                                                                             | 1.7493 | 0      |
| 235613_at   |           | Transcribed locus                                                                                                                                                             | 0.7905 | 0.0285 |
| 235618_at   | ZNF507    | zinc finger protein 507                                                                                                                                                       | 0.5324 | 0.0099 |
| 235621_at   | LOC285014 | hypothetical protein LOC285014                                                                                                                                                | 0.4898 | 0.0109 |
| 235640_at   |           | Transcribed locus                                                                                                                                                             | 0.281  | 0.0159 |
| 235645_at   | ESCO1     | establishment of cohesion 1 homolog 1 (S. cerevisiae)                                                                                                                         | 0.7771 | 0.0047 |
| 235650_at   | FLJ23834  | hypothetical protein FLJ23834                                                                                                                                                 | 0.1437 | 0.0104 |
| 235652_at   |           | CDNA FLJ37623 fis; clone BRCOC2014013                                                                                                                                         | 1.1325 | 0.0088 |
| 235653_s_at | THAP6     | THAP domain containing 6                                                                                                                                                      | 1.0602 | 0.0009 |
| 235678_at   | GM2A      | GM2 ganglioside activator                                                                                                                                                     | 0.9638 | 0.0065 |
| 235679_at   |           | CDNA FLJ42928 fis; clone BRSSN2007076                                                                                                                                         | 0.4399 | 0.025  |
| 235681_at   |           | CDNA clone IMAGE:4819084                                                                                                                                                      | 0.9716 | 0.0079 |
| 235690_at   | ZNF594    | zinc finger protein 594                                                                                                                                                       | 0.332  | 0.0282 |
| 235693_at   |           | Transcribed locus                                                                                                                                                             | 2.5635 | 0      |
| 235697_at   |           | Transcribed locus                                                                                                                                                             | 0.2607 | 0.0226 |
| 235698_at   | ZFP90     | zinc finger protein 90 homolog (mouse)                                                                                                                                        | 1.6473 | 0.0002 |
| 235709_at   | GAS2L3    | growth arrest-specific 2 like 3                                                                                                                                               | 2.6885 | 0      |
| 235717_at   | ZNF229    | zinc finger protein 229                                                                                                                                                       | 0.4339 | 0.0132 |
| 235727_at   | KLHL28    | kelch-like 28 (Drosophila)                                                                                                                                                    | 1.0164 | 0.0017 |
| 235729_at   | ZNF514    | zinc finger protein 514                                                                                                                                                       | 1.0904 | 0.001  |
| 235738_at   |           | Transcribed locus                                                                                                                                                             | 0.1377 | 0.0411 |

|             |           |                                                                                                |        |        |
|-------------|-----------|------------------------------------------------------------------------------------------------|--------|--------|
| 235749_at   | UGCGL2    | UDP-glucose ceramide glucosyltransferase-like 2                                                | 1.3382 | 0.0064 |
| 235752_at   |           | Transcribed locus                                                                              | 0.428  | 0.0009 |
| 235757_at   |           | Transcribed locus                                                                              | 0.6241 | 0.0466 |
| 235758_at   | PNMA6A    | paraneoplastic antigen like 6A                                                                 | 1.2925 | 0.0014 |
| 235763_at   | SLC44A5   | solute carrier family 44; member 5                                                             | 2.5248 | 0.0014 |
| 235784_at   |           | Transcribed locus                                                                              | 0.2738 | 0.0022 |
| 235785_at   |           | CDNA FLJ43152 fis; clone D3OST2003024                                                          | 0.3218 | 0.0199 |
| 235788_at   |           | Transcribed locus                                                                              | 0.3521 | 0.0152 |
| 235793_at   |           | Transcribed locus                                                                              | 0.2675 | 0.0313 |
| 235796_at   |           | Transcribed locus                                                                              | 0.3892 | 0.0451 |
| 235803_at   |           | Transcribed locus                                                                              | 0.9329 | 0.015  |
| 235804_at   |           | Transcribed locus                                                                              | 0.751  | 0.0012 |
| 235810_at   | ZNF182    | zinc finger protein 182                                                                        | 0.9051 | 0.0004 |
| 235812_at   | TMEM188   | transmembrane protein 188                                                                      | 0.4901 | 0.0253 |
| 235822_at   | COQ9      | coenzyme Q9 homolog (S. cerevisiae)                                                            | 0.7194 | 0.0009 |
| 235826_at   |           | CDNA FLJ44257 fis; clone TKIDN2015263, MRNA;<br>cDNA DKFZp564E202 (from clone<br>DKFZp564E202) | 0.2682 | 0.0066 |
| 235835_at   |           | CDNA FLJ38721 fis; clone KIDNE2010052                                                          | 0.3097 | 0.0084 |
| 235836_at   | FLJ30594  | hypothetical locus FLJ30594                                                                    | 1.0425 | 0.0413 |
| 235840_at   | C15orf40  | chromosome 15 open reading frame 40                                                            | 0.5163 | 0.0097 |
| 235846_at   |           | CDNA FLJ23692 fis; clone HEP10227                                                              | 0.7401 | 0.0474 |
| 235851_s_at | GNAS      | GNAS complex locus                                                                             | 0.2374 | 0.021  |
| 235868_at   | MGEA5     | Meningioma expressed antigen 5 (hyaluronidase)                                                 | 0.3286 | 0.0029 |
| 235880_at   | FLJ37078  | hypothetical protein FLJ37078                                                                  | 1.8854 | 0.0001 |
| 235884_at   |           | Transcribed locus                                                                              | 0.3704 | 0.0006 |
| 235901_at   |           | Transcribed locus                                                                              | 0.658  | 0.0146 |
| 235902_at   |           | CDNA FLJ42963 fis; clone BRSTN2012380                                                          | 0.7751 | 0.0068 |
| 235905_at   |           | Transcribed locus                                                                              | 0.6233 | 0.002  |
| 235918_x_at | LRR1Q2    | leucine-rich repeats and IQ motif containing 2                                                 | 0.7257 | 0.0036 |
| 235925_at   | TCF12     | Transcription factor 12 (HTF4; helix-loop-helix<br>transcription factors 4)                    | 0.7683 | 0.0359 |
| 235926_at   |           | Transcribed locus                                                                              | 1.7001 | 0      |
| 235927_at   |           |                                                                                                | 3.2541 | 0      |
| 235937_at   | LOC647859 | occludin pseudogene                                                                            | 0.1437 | 0.0121 |
| 235948_at   | FAM80A    | family with sequence similarity 80; member A                                                   | 0.7933 | 0.0165 |
| 235949_at   |           | Transcribed locus                                                                              | 0.8721 | 0.0008 |
| 235952_at   |           | Transcribed locus                                                                              | 0.3063 | 0.0162 |

|             |          |                                                                                                     |        |        |
|-------------|----------|-----------------------------------------------------------------------------------------------------|--------|--------|
| 235954_at   |          | Transcribed locus; strongly similar to XP_529692.1 hypothetical protein XP_529692 [Pan troglodytes] | 0.483  | 0.0007 |
| 235959_at   | ARID4B   | AT rich interactive domain 4B (RBP1-like)                                                           | 0.7906 | 0.041  |
| 235968_at   | CENTG2   | centaurin; gamma 2                                                                                  | 0.15   | 0.0407 |
| 235969_at   | FLJ33996 | hypothetical protein FLJ33996                                                                       | 0.414  | 0.0177 |
| 235970_at   | LCORL    | ligand dependent nuclear receptor corepressor-like                                                  | 1.9738 | 0      |
| 235971_at   |          | Transcribed locus                                                                                   | 0.1918 | 0.0359 |
| 235984_at   |          |                                                                                                     | 0.7735 | 0.0102 |
| 235996_at   | RASSF8   | Ras association (RalGDS/AF-6) domain family 8                                                       | 0.2873 | 0.0202 |
| 236000_s_at |          | Transcribed locus                                                                                   | 0.8021 | 0.0145 |
| 236002_at   |          | CDNA FLJ27180 fis; clone SYN02180                                                                   | 0.1633 | 0.0429 |
| 236006_s_at | AKAP10   | A kinase (PRKA) anchor protein 10                                                                   | 0.5268 | 0.0223 |
| 236017_at   | CDKL3    | cyclin-dependent kinase-like 3                                                                      | 0.3013 | 0.0004 |
| 236018_at   |          |                                                                                                     | 0.26   | 0.0233 |
| 236026_at   | GPATCH2  | G patch domain containing 2                                                                         | 0.8243 | 0.0006 |
| 236034_at   |          |                                                                                                     | 2.7115 | 0      |
| 236046_at   | FLJ44896 | FLJ44896 protein                                                                                    | 0.7478 | 0.0448 |
| 236047_at   | C8orf5   | chromosome 8 open reading frame 5                                                                   | 0.8019 | 0.0056 |
| 236060_at   |          | Transcribed locus                                                                                   | 0.2802 | 0.0192 |
| 236092_at   |          | CDNA clone IMAGE:4791941                                                                            | 0.3722 | 0.0299 |
| 236097_at   |          | CDNA FLJ25731 fis; clone TST05584                                                                   | 0.7666 | 0.0243 |
| 236103_at   |          | Transcribed locus                                                                                   | 0.2764 | 0.0432 |
| 236104_at   |          | CDNA FLJ35303 fis; clone PROST2009571                                                               | 0.7214 | 0.0076 |
| 236106_at   |          | Transcribed locus                                                                                   | 0.3416 | 0.0171 |
| 236122_at   |          | Transcribed locus                                                                                   | 0.6186 | 0.0202 |
| 236126_at   | ACVR2B   | activin A receptor; type IIB                                                                        | 0.763  | 0.0086 |
| 236134_at   | WDR68    | WD repeat domain 68                                                                                 | 0.5844 | 0.0086 |
| 236138_at   |          | CDNA FLJ37302 fis; clone BRAMY2016009                                                               | 0.2583 | 0.0211 |
| 236149_at   |          | Transcribed locus                                                                                   | 1.4632 | 0.0003 |
| 236156_at   | LIPA     | lipase A; lysosomal acid; cholesterol esterase (Wolman disease)                                     | 0.5113 | 0.0387 |
| 236165_at   | MSL3L1   | male-specific lethal 3-like 1 (Drosophila)                                                          | 0.2319 | 0.0441 |
| 236179_at   |          | Transcribed locus                                                                                   | 2.0989 | 0.0183 |
| 236180_at   |          | Transcribed locus                                                                                   | 0.8736 | 0.0442 |
| 236194_at   |          | Transcribed locus; moderately similar to NP_001018860.1 protein LOC401398 [Homo sapiens]            | 0.6097 | 0.0101 |
| 236207_at   | SSFA2    | sperm specific antigen 2                                                                            | 0.388  | 0.02   |
| 236210_at   |          | Transcribed locus                                                                                   | 0.4226 | 0.0128 |
| 236215_at   |          |                                                                                                     | 0.7067 | 0      |



|             |           |                                                          |        |        |
|-------------|-----------|----------------------------------------------------------|--------|--------|
| 236217_at   | SLC31A1   | solute carrier family 31 (copper transporters); member 1 | 0.8166 | 0.0269 |
| 236219_at   | TMEM20    | transmembrane protein 20                                 | 0.4278 | 0.0255 |
| 236227_at   | TMEM161B  | transmembrane protein 161B                               | 1.2577 | 0.0002 |
| 236229_at   |           | Transcribed locus                                        | 1.6141 | 0.0002 |
| 236237_at   |           | Transcribed locus                                        | 0.3417 | 0.0066 |
| 236241_at   | MED31     | mediator complex subunit 31                              | 0.9866 | 0.0013 |
| 236246_x_at | LOC653160 | Hypothetical protein LOC653160                           | 0.1459 | 0.0086 |
| 236249_at   | IKIP      | IKK interacting protein                                  | 1.8342 | 0      |
| 236259_at   | STK4      | serine/threonine kinase 4                                | 0.9301 | 0.0001 |
| 236261_at   |           | CDNA FLJ41254 fis; clone BRAMY2033594                    | 1.2788 | 0.0004 |
| 236267_at   | ZNF346    | zinc finger protein 346                                  | 0.9071 | 0.0001 |
| 236274_at   | EIF3B     | eukaryotic translation initiation factor 3; subunit B    | 0.4173 | 0.016  |
| 236282_at   |           | CDNA clone IMAGE:4826240                                 | 0.844  | 0.003  |
| 236288_at   | RNF34     | ring finger protein 34                                   | 0.591  | 0      |
| 236291_at   | RDH5      | retinol dehydrogenase 5 (11-cis/9-cis)                   | 0.327  | 0.0264 |
| 236300_at   |           | CDNA FLJ37884 fis; clone BRSTN2012451                    | 0.5687 | 0.0247 |
| 236305_at   | RFESD     | Rieske (Fe-S) domain containing                          | 0.4024 | 0.0051 |
| 236310_at   |           | Transcribed locus                                        | 0.3158 | 0.0028 |
| 236312_at   |           | Transcribed locus                                        | 1.0455 | 0      |
| 236314_at   |           | Transcribed locus                                        | 0.6488 | 0.0052 |
| 236322_at   |           | Transcribed locus                                        | 1.1826 | 0.028  |
| 236346_at   |           | Transcribed locus                                        | 1.5479 | 0.0002 |
| 236353_at   |           | CDNA FLJ43467 fis; clone OCBBF2036752                    | 0.4228 | 0.0063 |
| 236354_at   |           | Transcribed locus                                        | 0.1262 | 0.0315 |
| 236368_at   | KIAA0368  | KIAA0368                                                 | 0.9475 | 0.0037 |
| 236379_at   |           |                                                          | 0.7585 | 0.0165 |
| 236390_at   | C20orf94  | chromosome 20 open reading frame 94                      | 0.4171 | 0.0471 |
| 236408_at   |           | Transcribed locus                                        | 0.2964 | 0.002  |
| 236409_at   |           | Transcribed locus                                        | 0.5259 | 0.0376 |
| 236411_at   |           | Transcribed locus                                        | 0.4974 | 0.0466 |
| 236428_at   |           | Transcribed locus                                        | 0.3932 | 0.0341 |
| 236429_at   |           | Homo sapiens; clone IMAGE:4423835; mRNA                  | 1.5528 | 0.0002 |
| 236431_at   | SR140     | U2-associated SR140 protein                              | 0.2465 | 0.0496 |
| 236435_at   |           |                                                          | 0.9067 | 0.0086 |
| 236458_at   |           | Transcribed locus                                        | 0.456  | 0.0039 |
| 236462_at   |           | Transcribed locus                                        | 1.0711 | 0.0082 |
| 236469_at   |           | MRNA full length insert cDNA clone EUROIMAGE 110216      | 0.292  | 0.0103 |
| 236472_at   |           | Transcribed locus                                        | 0.5035 | 0.0431 |

|             |           |                                                                                               |        |        |
|-------------|-----------|-----------------------------------------------------------------------------------------------|--------|--------|
| 236474_at   |           | Transcribed locus                                                                             | 1.4663 | 0.0007 |
| 236480_at   |           | CDNA FLJ41489 fis; clone BRTHA2004582                                                         | 0.8937 | 0.0477 |
| 236487_at   | SCLT1     | sodium channel and clathrin linker 1                                                          | 0.5605 | 0.0074 |
| 236488_s_at |           | CDNA FLJ36309 fis; clone THYMU2004986                                                         | 0.9229 | 0.0009 |
| 236494_x_at |           | CDNA clone IMAGE:5175565                                                                      | 0.6783 | 0.0005 |
| 236500_at   |           | Transcribed locus                                                                             | 0.3035 | 0.044  |
| 236502_at   |           |                                                                                               | 0.2229 | 0.0141 |
| 236503_at   |           | Transcribed locus                                                                             | 0.4224 | 0.0231 |
| 236517_at   | MEGF10    | multiple EGF-like-domains 10                                                                  | 2.5874 | 0.0005 |
| 236533_at   | DDEF1     | development and differentiation enhancing factor 1                                            | 0.3729 | 0.0379 |
| 236535_at   | SMC6      | structural maintenance of chromosomes 6                                                       | 0.3491 | 0.0045 |
| 236589_at   |           |                                                                                               | 0.1503 | 0.0375 |
| 236605_at   | EIF3K     | eukaryotic translation initiation factor 3; subunit K                                         | 0.3262 | 0.0017 |
| 236607_at   |           | Transcribed locus                                                                             | 0.2588 | 0.0221 |
| 236610_at   |           | Transcribed locus                                                                             | 1.0286 | 0.0261 |
| 236612_at   |           | Transcribed locus                                                                             | 0.1213 | 0.0391 |
| 236613_at   | RBM25     | RNA binding motif protein 25                                                                  | 0.2571 | 0.0488 |
| 236619_at   |           | Transcribed locus                                                                             | 0.6394 | 0.0001 |
| 236620_at   | RIF1      | RAP1 interacting factor homolog (yeast)                                                       | 0.9098 | 0.0161 |
| 236634_at   | C8orf48   | chromosome 8 open reading frame 48                                                            | 0.5693 | 0.0085 |
| 236635_at   | ZNF667    | zinc finger protein 667                                                                       | 1.1247 | 0.0336 |
| 236637_at   |           | Transcribed locus                                                                             | 0.3823 | 0.0027 |
| 236641_at   | KIF14     | kinesin family member 14                                                                      | 2.2607 | 0.0003 |
| 236659_x_at |           | Transcribed locus                                                                             | 0.4852 | 0.0015 |
| 236664_at   | AKT2      | v-akt murine thymoma viral oncogene homolog 2                                                 | 0.3874 | 0.0288 |
| 236671_at   |           |                                                                                               | 0.2313 | 0.0468 |
| 236676_at   |           | Transcribed locus                                                                             | 0.3102 | 0.0008 |
| 236692_at   | LOC729839 | similar to DTW domain containing 2                                                            | 0.4943 | 0.0306 |
| 236696_at   | SR140     | U2-associated SR140 protein                                                                   | 0.8714 | 0.0165 |
| 236719_at   |           | Transcribed locus; moderately similar to XP_001086437.1 hypothetical protein [Macaca mulatta] | 0.2368 | 0.0274 |
| 236751_at   |           | Transcribed locus                                                                             | 0.2075 | 0.0424 |
| 236752_at   |           | Transcribed locus                                                                             | 0.868  | 0.0073 |
| 236766_at   |           | Transcribed locus                                                                             | 0.5345 | 0.0206 |
| 236777_at   |           | Full-length cDNA clone CS0DF025YH20 of Fetal brain of Homo sapiens (human)                    | 0.6142 | 0.0104 |
| 236778_at   |           | Transcribed locus                                                                             | 0.6689 | 0.0377 |
| 236780_at   |           | Transcribed locus                                                                             | 0.2599 | 0.0453 |

|             |              |                                                                                                                              |        |        |
|-------------|--------------|------------------------------------------------------------------------------------------------------------------------------|--------|--------|
| 236808_at   | FGFR1OP2     | FGFR1 oncogene partner 2                                                                                                     | 0.9436 | 0.0056 |
| 236811_at   | DMRTC2       | DMRT-like family C2                                                                                                          | 0.1164 | 0.0005 |
| 236816_at   | C12orf30     | chromosome 12 open reading frame 30                                                                                          | 0.8638 | 0.0115 |
| 236837_x_at | LOC650794    | Similar to FRAS1-related extracellular matrix protein 2 precursor (ECM3 homolog)                                             | 0.5993 | 0.0174 |
| 236841_at   | FAM39DP      | Family with sequence similarity 39; member D pseudogene                                                                      | 0.907  | 0.002  |
| 236852_at   | FBXO43       | F-box protein 43                                                                                                             | 0.3446 | 0.0081 |
| 236862_at   | GOPC         | Golgi associated PDZ and coiled-coil motif containing                                                                        | 0.4916 | 0.0013 |
| 236875_at   |              | Transcribed locus                                                                                                            | 0.5985 | 0.0024 |
| 236879_at   |              | Transcribed locus                                                                                                            | 0.5687 | 0.0123 |
| 236880_at   | RAD52        | RAD52 homolog (S. cerevisiae)                                                                                                | 0.1035 | 0.046  |
| 236883_at   |              | Transcribed locus                                                                                                            | 0.7011 | 0.0033 |
| 236910_at   | MRPL39       | Mitochondrial ribosomal protein L39                                                                                          | 0.8078 | 0.0211 |
| 236911_at   | FAM80B       | Family with sequence similarity 80; member B                                                                                 | 0.2507 | 0.0453 |
| 236915_at   |              |                                                                                                                              | 1.5122 | 0.0161 |
| 236923_x_at |              |                                                                                                                              | 0.8403 | 0.0175 |
| 236924_at   | GLMN         | glomulin; FKBP associated protein                                                                                            | 0.9561 | 0.0136 |
| 236930_at   | NUMB         | Numb homolog (Drosophila)                                                                                                    | 0.2652 | 0.0125 |
| 236935_at   |              | CDNA clone IMAGE:4813920                                                                                                     | 0.2296 | 0.0357 |
| 236953_s_at | RP11-50D16.3 | similar to RIKEN cDNA 8030451K01                                                                                             | 0.7385 | 0.0058 |
| 236955_at   |              | Transcribed locus                                                                                                            | 0.4031 | 0.0076 |
| 236957_at   | CDCA2        | cell division cycle associated 2                                                                                             | 0.632  | 0.0164 |
| 236961_at   |              | Transcribed locus                                                                                                            | 0.646  | 0.0185 |
| 236969_at   |              | Transcribed locus                                                                                                            | 0.3469 | 0.0221 |
| 236985_at   |              | CDNA FLJ37855 fis; clone BRSSN2014636                                                                                        | 0.2722 | 0.0204 |
| 236999_at   |              | CDNA FLJ33156 fis; clone UTERU2000377; weakly similar to PROBABLE PEPTIDYL-PROLYL CIS-TRANS ISOMERASE C57A10.03 (EC 5.2.1.8) | 0.2776 | 0.0426 |
| 237005_at   | LOC442075    | weakly similar to serine/threonine protein kinase Kp78                                                                       | 0.4428 | 0.0098 |
| 237034_at   |              | Full-length cDNA clone CS0DC025YP03 of Neuroblastoma Cot 25-normalized of Homo sapiens (human)                               | 0.6491 | 0.0251 |
| 237051_at   |              | Transcribed locus                                                                                                            | 0.5175 | 0.048  |
| 237061_at   | ZNF347       | zinc finger protein 347                                                                                                      | 0.2865 | 0.0068 |
| 237067_at   |              |                                                                                                                              | 0.2173 | 0.0272 |
| 237071_at   |              | Transcribed locus                                                                                                            | 0.1349 | 0.0222 |
| 237106_at   | SLC11A2      | Solute carrier family 11 (proton-coupled divalent metal ion transporters); member 2                                          | 0.4489 | 0.0119 |
| 237110_at   |              | Transcribed locus                                                                                                            | 0.2389 | 0.0125 |

|             |           |                                                                                    |        |        |
|-------------|-----------|------------------------------------------------------------------------------------|--------|--------|
| 237114_at   |           | Transcribed locus                                                                  | 0.1148 | 0.0435 |
| 237116_at   | LOC646903 | hypothetical LOC646903                                                             | 0.5585 | 0.002  |
| 237130_at   |           | Transcribed locus                                                                  | 0.1234 | 0.0375 |
| 237145_at   | EIF2AK4   | eukaryotic translation initiation factor 2 alpha kinase 4                          | 0.2711 | 0.0138 |
| 237158_s_at | MPHOSPH9  | M-phase phosphoprotein 9                                                           | 0.8127 | 0.0146 |
| 237173_at   | LOC647500 | similar to phosphodiesterase 4D interacting protein isoform 1                      | 0.1168 | 0.0375 |
| 237182_at   | LOC653479 | Similar to mitochondrial ribosomal protein L45                                     | 0.1229 | 0.0232 |
| 237184_at   |           |                                                                                    | 0.2263 | 0.0077 |
| 237195_at   |           | Transcribed locus                                                                  | 0.133  | 0.0265 |
| 237198_at   |           | Transcribed locus                                                                  | 0.3477 | 0.0039 |
| 237208_at   | WDR61     | WD repeat domain 61                                                                | 0.484  | 0.0032 |
| 237215_s_at | TFRC      | transferrin receptor (p90; CD71)                                                   | 0.869  | 0.0475 |
| 237232_at   |           | Transcribed locus                                                                  | 0.2117 | 0.0375 |
| 237246_at   |           | Transcribed locus                                                                  | 1.3485 | 0.0001 |
| 237261_at   |           |                                                                                    | 1.3581 | 0      |
| 237301_at   |           | Transcribed locus                                                                  | 0.8434 | 0.0424 |
| 237304_at   | SYCE2     | synaptonemal complex central element protein 2                                     | 0.4688 | 0.0264 |
| 237309_at   |           | Transcribed locus                                                                  | 0.2893 | 0.0231 |
| 237330_at   |           | Transcribed locus                                                                  | 0.9043 | 0.0045 |
| 237369_at   |           | Transcribed locus                                                                  | 0.2164 | 0.0049 |
| 237376_at   |           |                                                                                    | 0.2738 | 0.0037 |
| 237388_at   | GLMN      | glomulin; FKBP associated protein                                                  | 0.7762 | 0.0004 |
| 237411_at   | ADAMTS6   | ADAM metalloproteinase with thrombospondin type 1 motif, 6                         | 0.9786 | 0.0018 |
| 237418_at   | CDK5RAP2  | CDK5 regulatory subunit associated protein 2                                       | 0.5862 | 0.0008 |
| 237441_at   |           |                                                                                    | 0.7481 | 0.0425 |
| 237456_at   |           | Transcribed locus                                                                  | 0.7986 | 0.0148 |
| 237459_at   |           |                                                                                    | 0.4336 | 0.0346 |
| 237475_x_at | SEPP1     | Selenoprotein P; plasma; 1                                                         | 0.5205 | 0.0034 |
| 237483_at   |           | Transcribed locus                                                                  | 1.4484 | 0.008  |
| 237502_at   | CRLS1     | Cardiolipin synthase 1                                                             | 0.4504 | 0.011  |
| 237504_at   | INTS10    | integrator complex subunit 10                                                      | 0.2413 | 0.0425 |
| 237530_at   |           | Transcribed locus                                                                  | 3.1189 | 0.0008 |
| 237560_at   | MRPS5     | mitochondrial ribosomal protein S5                                                 | 0.361  | 0.0216 |
| 237577_at   | LOC729298 | PEST proteolytic signal containing nuclear protein, hypothetical protein LOC729298 | 0.5361 | 0.0234 |
| 237585_at   |           |                                                                                    | 0.5694 | 0.0298 |
| 237591_at   | FLJ42957  | FLJ42957 protein                                                                   | 0.9328 | 0.0171 |
| 237600_at   |           | Transcribed locus                                                                  | 1.0942 | 0.0024 |
| 237626_at   |           | Transcribed locus                                                                  | 1.5069 | 0.0007 |

|             |             |                                                                                                                                                                                                                                                                                                                         |        |        |
|-------------|-------------|-------------------------------------------------------------------------------------------------------------------------------------------------------------------------------------------------------------------------------------------------------------------------------------------------------------------------|--------|--------|
| 237632_at   |             |                                                                                                                                                                                                                                                                                                                         | 0.347  | 0.0129 |
| 237671_at   |             | Transcribed locus                                                                                                                                                                                                                                                                                                       | 0.1744 | 0.0176 |
| 237681_at   |             | Transcribed locus; weakly similar to NP_001039706.1 protein LOC518880 [Bos taurus]                                                                                                                                                                                                                                      | 0.4335 | 0.0004 |
| 237689_at   | SARS        | Seryl-tRNA synthetase                                                                                                                                                                                                                                                                                                   | 0.4294 | 0.01   |
| 237725_x_at | SMC5        | structural maintenance of chromosomes 5                                                                                                                                                                                                                                                                                 | 0.3207 | 0.0004 |
| 237737_at   | LOC375010   | hypothetical LOC375010, hypothetical LOC401131, hypothetical LOC643166, hypothetical LOC643579, hypothetical protein LOC728295, hypothetical protein LOC728364, hypothetical protein LOC728384, hypothetical protein LOC728759, hypothetical protein LOC728783, similar to Ankyrin repeat domain-containing protein 18A | 3.4826 | 0.0004 |
| 237741_at   | SLC25A36    | Solute carrier family 25; member 36                                                                                                                                                                                                                                                                                     | 0.8546 | 0.0059 |
| 237746_at   | SFRS11      | Splicing factor; arginine/serine-rich 11                                                                                                                                                                                                                                                                                | 0.3763 | 0.0256 |
| 237750_at   | XPNPEP3     | X-prolyl aminopeptidase (aminopeptidase P) 3; putative                                                                                                                                                                                                                                                                  | 0.2884 | 0.0135 |
| 237783_at   | PLAC8L1     | PLAC8-like 1                                                                                                                                                                                                                                                                                                            | 0.1859 | 0.0255 |
| 237802_at   | XKR4        | XK; Kell blood group complex subunit-related family; member 4                                                                                                                                                                                                                                                           | 1.6075 | 0.034  |
| 237803_x_at |             | Transcribed locus                                                                                                                                                                                                                                                                                                       | 0.5807 | 0.0427 |
| 237863_at   | TMPO        | thymopoietin                                                                                                                                                                                                                                                                                                            | 0.228  | 0.0053 |
| 237868_x_at |             | Transcribed locus                                                                                                                                                                                                                                                                                                       | 0.5691 | 0.0093 |
| 237878_at   |             |                                                                                                                                                                                                                                                                                                                         | 0.282  | 0.014  |
| 237884_x_at | TRPM7       | transient receptor potential cation channel; subfamily M; member 7                                                                                                                                                                                                                                                      | 0.5465 | 0      |
| 237942_at   |             | Transcribed locus; strongly similar to XP_001115106.1 similar to SNF related kinase isoform 1 [Macaca mulatta]                                                                                                                                                                                                          | 0.2004 | 0.0068 |
| 237943_at   |             |                                                                                                                                                                                                                                                                                                                         | 0.2686 | 0.0254 |
| 237951_at   |             |                                                                                                                                                                                                                                                                                                                         | 0.1892 | 0.0158 |
| 237972_at   |             |                                                                                                                                                                                                                                                                                                                         | 0.1378 | 0.0047 |
| 237984_x_at |             | Transcribed locus                                                                                                                                                                                                                                                                                                       | 0.1251 | 0.0372 |
| 237999_at   |             |                                                                                                                                                                                                                                                                                                                         | 0.3458 | 0.0116 |
| 238000_at   |             | Transcribed locus                                                                                                                                                                                                                                                                                                       | 1.0091 | 0.0004 |
| 238012_at   | DPP7        | Dipeptidyl-peptidase 7                                                                                                                                                                                                                                                                                                  | 0.7713 | 0.022  |
| 238015_at   | LOC201725   | hypothetical protein LOC201725                                                                                                                                                                                                                                                                                          | 1.575  | 0.0003 |
| 238021_s_at | hCG_1815491 | hCG1815491                                                                                                                                                                                                                                                                                                              | 2.9658 | 0      |
| 238022_at   | hCG_1815491 | hCG1815491                                                                                                                                                                                                                                                                                                              | 2.0594 | 0      |
| 238037_at   | LMLN        | leishmanolysin-like (metallopeptidase M8 family)                                                                                                                                                                                                                                                                        | 0.2469 | 0.0125 |
| 238042_at   |             | Transcribed locus                                                                                                                                                                                                                                                                                                       | 0.9707 | 0.0028 |
| 238070_at   | CHD1L       | Chromodomain helicase DNA binding protein 1-like                                                                                                                                                                                                                                                                        | 0.6024 | 0.0438 |

|             |          |                                                                                               |        |        |
|-------------|----------|-----------------------------------------------------------------------------------------------|--------|--------|
| 238075_at   |          | Transcribed locus                                                                             | 1.4454 | 0.0001 |
| 238098_at   |          | Transcribed locus                                                                             | 0.5365 | 0.0212 |
| 238108_at   |          | Transcribed locus                                                                             | 0.7685 | 0.0163 |
| 238109_at   |          | Homo sapiens; clone IMAGE:4346533; mRNA                                                       | 0.6128 | 0.0049 |
| 238114_at   | PCMTD1   | Protein-L-isoaspartate (D-aspartate) O-methyltransferase domain containing 1                  | 0.4901 | 0.0132 |
| 238119_at   |          | Transcribed locus                                                                             | 0.6889 | 0.0022 |
| 238122_at   | RBM12B   | RNA binding motif protein 12B                                                                 | 0.8778 | 0.0001 |
| 238130_at   | NFATC2IP | nuclear factor of activated T-cells; cytoplasmic; calcineurin-dependent 2 interacting protein | 0.2286 | 0.0406 |
| 238137_at   |          | Transcribed locus                                                                             | 0.154  | 0.0026 |
| 238142_at   |          | CDNA FLJ37584 fis; clone BRCOC2004950                                                         | 1.0958 | 0.0003 |
| 238146_at   |          | Transcribed locus                                                                             | 0.4348 | 0.0179 |
| 238149_at   | ZNF818   | zinc finger protein 818                                                                       | 0.5171 | 0.0375 |
| 238154_at   | CEP70    | Centrosomal protein 70kDa                                                                     | 0.4102 | 0.0353 |
| 238174_at   |          | Transcribed locus                                                                             | 0.6405 | 0.0035 |
| 238176_at   | RAPGEF2  | Rap guanine nucleotide exchange factor (GEF) 2                                                | 0.5466 | 0.0169 |
| 238193_at   |          | Transcribed locus                                                                             | 0.4332 | 0.0381 |
| 238220_at   | UTX      | ubiquitously transcribed tetratricopeptide repeat; X chromosome                               | 0.2715 | 0.0031 |
| 238229_at   | TMEM67   | Transmembrane protein 67                                                                      | 0.3462 | 0.0448 |
| 238231_at   | NFYC     | Nuclear transcription factor Y; gamma                                                         | 0.2339 | 0.0194 |
| 238279_x_at |          |                                                                                               | 0.6814 | 0.001  |
| 238295_at   | C17orf42 | Chromosome 17 open reading frame 42                                                           | 0.5835 | 0.0064 |
| 238297_at   |          |                                                                                               | 0.6048 | 0.0423 |
| 238299_at   |          |                                                                                               | 0.7755 | 0.0027 |
| 238311_at   |          | Transcribed locus                                                                             | 0.9712 | 0.007  |
| 238315_s_at | ZNF567   | zinc finger protein 567                                                                       | 0.7139 | 0.013  |
| 238320_at   | TncRNA   | trophoblast-derived noncoding RNA                                                             | 1.3891 | 0.0043 |
| 238337_s_at | DNAJA5   | DnaJ homology subfamily A member 5                                                            | 1.3312 | 0      |
| 238341_at   |          |                                                                                               | 0.9221 | 0.0001 |
| 238342_at   |          |                                                                                               | 0.5033 | 0.0109 |
| 238346_s_at | TGS1     | trimethylguanosine synthase homolog (S. cerevisiae)                                           | 0.8203 | 0.0078 |
| 238350_at   | FLJ25778 | hypothetical protein FLJ25778                                                                 | 0.6272 | 0.0095 |
| 238412_at   | CDR2     | Cerebellar degeneration-related protein 2; 62kDa                                              | 0.8225 | 0.0045 |
| 238416_x_at | NHN1     | conserved nuclear protein NHN1                                                                | 0.1886 | 0.0297 |
| 238418_at   | SLC35B4  | solute carrier family 35; member B4                                                           | 0.9675 | 0.0031 |
| 238421_at   | RC3H2    | Ring finger and CCCH-type zinc finger domains 2                                               | 0.6796 | 0.0097 |
| 238427_at   | GRPEL2   | GrpE-like 2; mitochondrial (E. coli)                                                          | 0.424  | 0.0066 |

|             |           |                                                                                                                                                 |        |        |
|-------------|-----------|-------------------------------------------------------------------------------------------------------------------------------------------------|--------|--------|
| 238435_at   |           |                                                                                                                                                 | 0.738  | 0.0001 |
| 238437_at   | ZNF805    | zinc finger protein 805                                                                                                                         | 0.5078 | 0.0292 |
| 238444_at   | ZNF618    | zinc finger protein 618                                                                                                                         | 1.1697 | 0.0007 |
| 238449_at   | LOC595101 | PI-3-kinase-related kinase SMG-1 pseudogene                                                                                                     | 1.334  | 0.0003 |
| 238457_at   |           | CDNA FLJ33029 fis; clone THYMU2000162                                                                                                           | 0.1737 | 0.0406 |
| 238464_at   | ANKRD36   | KIAA1641, ankyrin repeat domain 36, similar to ankyrin repeat domain 36, similar to protein immuno-reactive with anti-PTH polyclonal antibodies | 0.3541 | 0.0002 |
| 238466_at   |           | CDNA FLJ33443 fis; clone BRALZ1000103                                                                                                           | 0.9879 | 0.0336 |
| 238475_at   | ALG10B    | asparagine-linked glycosylation 10 homolog B (yeast; alpha-1;2-glucosyltransferase)                                                             | 0.5724 | 0.0029 |
| 238484_s_at |           | MRNA; clone CD 43T7                                                                                                                             | 0.8519 | 0.009  |
| 238490_at   | KIAA2026  | KIAA2026                                                                                                                                        | 0.4185 | 0.0317 |
| 238495_at   |           | CDNA FLJ41444 fis; clone BRSTN2001801                                                                                                           | 0.3532 | 0.022  |
| 238496_at   |           | Transcribed locus                                                                                                                               | 1.1627 | 0.0001 |
| 238508_at   | DBF4B     | DBF4 homolog B (S. cerevisiae)                                                                                                                  | 0.4046 | 0.0295 |
| 238511_at   | LOC440288 | Similar to FLJ16518 protein                                                                                                                     | 0.2248 | 0.0393 |
| 238525_at   | DDX56     | DEAD (Asp-Glu-Ala-Asp) box polypeptide 56                                                                                                       | 0.3204 | 0.0082 |
| 238529_at   |           | CDNA clone IMAGE:6342029                                                                                                                        | 0.6371 | 0.0341 |
| 238530_at   |           |                                                                                                                                                 | 0.5851 | 0.0117 |
| 238535_at   | CEP152    | centrosomal protein 152kDa                                                                                                                      | 0.2706 | 0.0388 |
| 238536_at   |           | CDNA FLJ13474 fis; clone PLACE1003593                                                                                                           | 1.2129 | 0.0044 |
| 238538_at   | ANKRD11   | ankyrin repeat domain 11                                                                                                                        | 0.3657 | 0.0142 |
| 238542_at   | ULBP2     | UL16 binding protein 2                                                                                                                          | 2.4076 | 0.0004 |
| 238548_at   |           | Transcribed locus                                                                                                                               | 0.2158 | 0.0271 |
| 238549_at   | CBFA2T2   | core-binding factor; runt domain; alpha subunit 2; translocated to; 2                                                                           | 2.2724 | 0      |
| 238551_at   | FUT11     | fucosyltransferase 11 (alpha (1;3) fucosyltransferase)                                                                                          | 0.8485 | 0.0055 |
| 238553_at   | BMS1P5    | BMS1 pseudogene 5, centaurin; gamma-like family; member 2, centaurin; gamma-like family; member 9 pseudogene, hypothetical protein LOC643564    | 0.2565 | 0.0368 |
| 238562_at   |           | Full-length cDNA clone CS0DI039YF12 of Placenta Cot 25-normalized of Homo sapiens (human)                                                       | 0.4135 | 0.0363 |
| 238563_at   |           | Transcribed locus                                                                                                                               | 0.9384 | 0.0027 |
| 238571_at   |           | Transcribed locus                                                                                                                               | 1.2461 | 0      |
| 238575_at   | OSBPL6    | oxysterol binding protein-like 6                                                                                                                | 1.5255 | 0.0028 |
| 238578_at   | TMEM182   | transmembrane protein 182                                                                                                                       | 0.2283 | 0.011  |
| 238589_s_at |           | Transcribed locus                                                                                                                               | 1.0222 | 0.0001 |

|             |           |                                                                                                                           |        |        |
|-------------|-----------|---------------------------------------------------------------------------------------------------------------------------|--------|--------|
| 238593_at   | C11orf80  | chromosome 11 open reading frame 80                                                                                       | 1.2052 | 0.0029 |
| 238596_at   | C10orf4   | chromosome 10 open reading frame 4                                                                                        | 0.2401 | 0.0316 |
| 238610_s_at |           | Transcribed locus                                                                                                         | 0.7    | 0.0129 |
| 238611_at   |           | Transcribed locus                                                                                                         | 0.6215 | 0.0339 |
| 238612_at   |           | Transcribed locus                                                                                                         | 0.564  | 0.0142 |
| 238614_x_at | ZNF430    | zinc finger protein 430                                                                                                   | 0.9685 | 0.0076 |
| 238620_at   |           | Transcribed locus                                                                                                         | 0.3632 | 0.0031 |
| 238630_at   | OPA3      | optic atrophy 3 (autosomal recessive; with chorea and spastic paraplegia)                                                 | 0.497  | 0.0117 |
| 238635_at   | C5orf28   | chromosome 5 open reading frame 28                                                                                        | 2.0817 | 0      |
| 238637_at   |           | Transcribed locus                                                                                                         | 0.46   | 0.0016 |
| 238653_at   |           | CDNA FLJ43454 fis; clone OCBBF2034906                                                                                     | 0.6178 | 0.0203 |
| 238654_at   | LOC147645 | hypothetical protein LOC147645                                                                                            | 0.8818 | 0.0093 |
| 238656_at   |           | Transcribed locus                                                                                                         | 1.1026 | 0.0003 |
| 238666_at   |           | Transcribed locus                                                                                                         | 1.6475 | 0.0102 |
| 238670_at   |           | CDNA FLJ41972 fis; clone SKNMC2003987                                                                                     | 0.3182 | 0.0397 |
| 238672_at   |           | Transcribed locus                                                                                                         | 0.6106 | 0.0127 |
| 238677_at   | WDR36     | WD repeat domain 36                                                                                                       | 0.5548 | 0.0147 |
| 238678_at   | tcag7.907 | hypothetical LOC402483                                                                                                    | 0.6399 | 0.0016 |
| 238690_at   |           |                                                                                                                           | 0.2788 | 0.0095 |
| 238695_s_at | RAB39B    | RAB39B; member RAS oncogene family                                                                                        | 0.6955 | 0.0404 |
| 238699_s_at | CASK      | calcium/calmodulin-dependent serine protein kinase (MAGUK family)                                                         | 0.7192 | 0.0114 |
| 238706_at   | PAPD4     | PAP associated domain containing 4                                                                                        | 1.0836 | 0      |
| 238722_x_at | NAPE-PLD  | N-acyl-phosphatidylethanolamine-hydrolyzing phospholipase D                                                               | 0.8305 | 0.0011 |
| 238723_at   | ATXN3     | Ataxin 3                                                                                                                  | 0.3358 | 0.0456 |
| 238733_at   |           | Transcribed locus                                                                                                         | 0.6472 | 0.0116 |
| 238735_at   |           |                                                                                                                           | 0.793  | 0.0061 |
| 238738_at   | PSMD7     | Proteasome (prosome; macropain) 26S subunit; non-ATPase; 7                                                                | 0.5973 | 0.0031 |
| 238740_at   | AARSD1    | alanyl-tRNA synthetase domain containing 1                                                                                | 0.1103 | 0.0226 |
| 238745_at   |           | Transcribed locus; strongly similar to XP_001100143.1 similar to integrator complex subunit 10 isoform 1 [Macaca mulatta] | 0.2308 | 0.0039 |
| 238750_at   | CCL28     | chemokine (C-C motif) ligand 28                                                                                           | 0.9908 | 0.0128 |
| 238756_at   | GAS2L3    | Growth arrest-specific 2 like 3                                                                                           | 4.8515 | 0      |
| 238759_at   | CCDC88A   | coiled-coil domain containing 88A                                                                                         | 0.3839 | 0.0235 |
| 238768_at   | LOC388969 | hypothetical LOC388969                                                                                                    | 0.861  | 0.0148 |
| 238775_at   |           | Transcribed locus                                                                                                         | 0.9308 | 0.0032 |



|             |           |                                                                                                                                                           |        |        |
|-------------|-----------|-----------------------------------------------------------------------------------------------------------------------------------------------------------|--------|--------|
| 238779_at   | DCP2      | DCP2 decapping enzyme homolog ( <i>S. cerevisiae</i> )                                                                                                    | 0.2451 | 0.0095 |
| 238781_at   | SFRS12    | splicing factor; arginine/serine-rich 12                                                                                                                  | 0.8162 | 0.0042 |
| 238783_at   | TMEM161B  | transmembrane protein 161B                                                                                                                                | 1.4496 | 0      |
| 238785_at   |           | Transcribed locus                                                                                                                                         | 0.995  | 0.0098 |
| 238788_at   | LOC494150 | prohibitin pseudogene                                                                                                                                     | 0.5041 | 0.0013 |
| 238791_at   | ZNF100    | zinc finger protein 100                                                                                                                                   | 0.4474 | 0.0091 |
| 238793_at   | TIGD7     | tigger transposable element derived 7                                                                                                                     | 1.566  | 0      |
| 238794_at   | C10orf78  | chromosome 10 open reading frame 78                                                                                                                       | 0.6312 | 0.0115 |
| 238795_at   | C10orf18  | chromosome 10 open reading frame 18                                                                                                                       | 0.414  | 0.0096 |
| 238796_at   |           | Transcribed locus; weakly similar to XP_001098270.1 similar to YTH domain-containing protein 1 (Putative splicing factor YT521) [ <i>Macaca mulatta</i> ] | 0.1966 | 0.049  |
| 238797_at   | TRIM11    | tripartite motif-containing 11                                                                                                                            | 0.3759 | 0.046  |
| 238803_at   | HECTD2    | HECT domain containing 2                                                                                                                                  | 0.7361 | 0.0098 |
| 238806_at   |           | Transcribed locus                                                                                                                                         | 0.4804 | 0.0078 |
| 238808_at   |           | Transcribed locus                                                                                                                                         | 1.8645 | 0.0001 |
| 238811_at   | ATP11B    | ATPase; Class VI; type 11B                                                                                                                                | 0.2779 | 0.0119 |
| 238818_at   | KIAA1429  | KIAA1429                                                                                                                                                  | 0.5175 | 0.0002 |
| 238819_at   | ZNF347    | zinc finger protein 347                                                                                                                                   | 0.6935 | 0.0035 |
| 238831_at   |           | Transcribed locus                                                                                                                                         | 0.6155 | 0.0102 |
| 238838_at   | TCERG1    | Transcription elongation regulator 1                                                                                                                      | 0.4928 | 0.0009 |
| 238842_at   |           |                                                                                                                                                           | 0.4853 | 0.0073 |
| 238848_at   | OTUD4     | OTU domain containing 4                                                                                                                                   | 0.3467 | 0.0138 |
| 238850_at   | LOC645323 | hypothetical LOC645323                                                                                                                                    | 1.5687 | 0.0107 |
| 238851_at   | ANKRD13A  | ankyrin repeat domain 13A                                                                                                                                 | 0.7935 | 0.0217 |
| 238854_at   |           | CDNA: FLJ23130 fis; clone LNG08419                                                                                                                        | 0.3787 | 0.0167 |
| 238859_at   | KIAA0974  | KIAA0974                                                                                                                                                  | 0.2134 | 0.0005 |
| 238860_at   | C6orf130  | chromosome 6 open reading frame 130                                                                                                                       | 0.71   | 0.0462 |
| 238861_at   |           | MRNA; clone CD 43T7                                                                                                                                       | 0.7724 | 0.0374 |
| 238862_at   | MFSD4     | major facilitator superfamily domain containing 4                                                                                                         | 0.1397 | 0.0095 |
| 238863_x_at |           | Transcribed locus                                                                                                                                         | 0.3129 | 0.0161 |
| 238867_at   | TMEM182   | transmembrane protein 182                                                                                                                                 | 0.4629 | 0.0171 |
| 238874_at   | FLJ43663  | Hypothetical protein FLJ43663                                                                                                                             | 0.1519 | 0.0265 |
| 238875_at   |           | Clone HLS_IMAGE_731119 mRNA sequence                                                                                                                      | 1.4315 | 0.0006 |
| 238880_at   | GTF3A     | general transcription factor IIIA                                                                                                                         | 0.8561 | 0.029  |
| 238883_at   |           | Transcribed locus                                                                                                                                         | 0.953  | 0.0241 |
| 238884_at   |           | Transcribed locus                                                                                                                                         | 0.3598 | 0.0237 |
| 238894_at   |           | Transcribed locus                                                                                                                                         | 0.3459 | 0.0036 |

|             |           |                                                                                                                                         |        |        |
|-------------|-----------|-----------------------------------------------------------------------------------------------------------------------------------------|--------|--------|
| 238896_at   |           | Transcribed locus                                                                                                                       | 0.2629 | 0.0122 |
| 238902_at   |           | Transcribed locus                                                                                                                       | 1.3235 | 0.0003 |
| 238906_s_at | RHOJ      | ras homolog gene family; member J                                                                                                       | 0.2637 | 0.0395 |
| 238907_at   |           | Transcribed locus                                                                                                                       | 1.0092 | 0.0046 |
| 238908_at   | CALU      | Calumenin                                                                                                                               | 0.81   | 0.0045 |
| 238917_s_at | MGC24039  | hypothetical protein MGC24039                                                                                                           | 0.3223 | 0.0148 |
| 238918_at   |           | CDNA FLJ42015 fis; clone SPLEN2032813                                                                                                   | 1.0783 | 0.0031 |
| 238920_at   |           |                                                                                                                                         | 0.4149 | 0.0039 |
| 238921_at   | LOC641767 | hypothetical LOC644794, hypothetical protein LOC641767                                                                                  | 0.1505 | 0.0436 |
| 238924_at   | BMS1P5    | BMS1 pseudogene 5, hypothetical protein LOC643564                                                                                       | 0.4107 | 0.0031 |
| 238925_at   | SNTB2     | syntrophin; beta 2 (dystrophin-associated protein A1; 59kDa; basic component 2)                                                         | 0.1844 | 0.0082 |
| 238932_at   |           | CDNA FLJ41867 fis; clone OCBBF2005546                                                                                                   | 1.1671 | 0.0016 |
| 238934_at   |           | Transcribed locus                                                                                                                       | 0.4979 | 0.0385 |
| 238937_at   | ZNF420    | zinc finger protein 420                                                                                                                 | 1.0757 | 0.0078 |
| 238944_at   |           |                                                                                                                                         | 2.5559 | 0      |
| 238956_at   |           | Transcribed locus; strongly similar to XP_524032.1 similar to ribosomal protein S15; rat insulinoma gene [Pan troglodytes]              | 0.7999 | 0.0387 |
| 238959_at   | LARP4     | La ribonucleoprotein domain family; member 4                                                                                            | 0.5766 | 0.0161 |
| 238960_s_at | LARP4     | La ribonucleoprotein domain family; member 4                                                                                            | 0.3533 | 0.0276 |
| 238963_at   |           | MRNA full length insert cDNA clone EUROIIMAGE 1652049                                                                                   | 0.7697 | 0.0188 |
| 238965_at   | C21orf2   | Chromosome 21 open reading frame 2                                                                                                      | 0.7812 | 0.0144 |
| 238970_at   |           | Transcribed locus                                                                                                                       | 0.7723 | 0.0131 |
| 238977_at   | MCM6      | minichromosome maintenance complex component 6                                                                                          | 0.4953 | 0.0007 |
| 238982_at   | DENR      | density-regulated protein, similar to Density-regulated protein (DRP) (DRP1 protein) (Smooth muscle cell-associated protein 3) (SMAP-3) | 0.6519 | 0.006  |
| 238996_x_at | ALDOA     | aldolase A; fructose-bisphosphate                                                                                                       | 0.5377 | 0.0043 |
| 238999_at   |           | Transcribed locus                                                                                                                       | 0.5422 | 0.0394 |
| 239002_at   | ASPM      | asp (abnormal spindle) homolog; microcephaly associated (Drosophila)                                                                    | 0.4902 | 0.0288 |
| 239005_at   |           | Transcribed locus                                                                                                                       | 0.6944 | 0.0143 |
| 239008_at   |           | CDNA clone IMAGE:4328048                                                                                                                | 0.1865 | 0.0359 |
| 239010_at   | DUXAP10   | Double homeobox A pseudogene 10                                                                                                         | 2.1542 | 0.0003 |
| 239014_at   | CCAR1     | Cell division cycle and apoptosis regulator 1                                                                                           | 0.8926 | 0.0129 |
| 239018_at   | WBSCR18   | Williams Beuren syndrome chromosome region 18                                                                                           | 0.6797 | 0.0002 |
| 239034_at   | CXorf24   | chromosome X open reading frame 24                                                                                                      | 0.7839 | 0.0005 |

|             |           |                                                                                             |        |        |
|-------------|-----------|---------------------------------------------------------------------------------------------|--------|--------|
| 239043_at   | ZNF404    | zinc finger protein 404                                                                     | 2.5577 | 0      |
| 239044_at   | ITFG1     | Integrin alpha FG-GAP repeat containing 1                                                   | 0.3233 | 0.0352 |
| 239070_at   |           | Full-length cDNA clone CS0CAP004YK07 of Thymus of Homo sapiens (human)                      | 0.2649 | 0.0034 |
| 239071_at   | RBBP4     | Retinoblastoma binding protein 4                                                            | 0.5239 | 0.0195 |
| 239083_at   | ZNF786    | zinc finger protein 786                                                                     | 0.5335 | 0.0101 |
| 239090_at   | FLJ13305  | hypothetical protein FLJ13305                                                               | 0.2153 | 0.0034 |
| 239091_at   |           | Transcribed locus                                                                           | 0.9938 | 0.0098 |
| 239106_at   |           | Homo sapiens; clone IMAGE:5244869; mRNA                                                     | 1.8466 | 0.0001 |
| 239121_at   |           | Transcribed locus                                                                           | 0.3459 | 0.027  |
| 239131_at   |           | Transcribed locus                                                                           | 0.9187 | 0.0049 |
| 239140_at   |           | Transcribed locus                                                                           | 0.3077 | 0.0121 |
| 239147_at   | ARSK      | arylsulfatase family; member K                                                              | 1.5506 | 0.0004 |
| 239149_at   |           | Transcribed locus                                                                           | 0.2134 | 0.0225 |
| 239151_at   | BMS1P5    | BMS1 pseudogene 5, hypothetical protein LOC643564                                           | 0.8796 | 0.0074 |
| 239154_at   |           | Transcribed locus; moderately similar to XP_523598.2 tousel-like kinase 2 [Pan troglodytes] | 1.2239 | 0.0001 |
| 239163_at   | UBE2B     | ubiquitin-conjugating enzyme E2B (RAD6 homolog)                                             | 0.8904 | 0.0117 |
| 239164_at   |           | Transcribed locus                                                                           | 0.4976 | 0.0027 |
| 239171_at   |           |                                                                                             | 0.3326 | 0.0036 |
| 239177_at   |           | CDNA FLJ38849 fis; clone MESAN2008936                                                       | 0.1767 | 0.0277 |
| 239179_at   |           |                                                                                             | 0.2374 | 0.0398 |
| 239188_at   | PPP2R3C   | Protein phosphatase 2 (formerly 2A); regulatory subunit B"; gamma                           | 0.4047 | 0.003  |
| 239193_at   | LOC158301 | hypothetical protein LOC158301                                                              | 1.0987 | 0.0054 |
| 239202_at   | RAB3B     | RAB3B; member RAS oncogene family                                                           | 0.8206 | 0.0333 |
| 239203_at   | C7orf53   | chromosome 7 open reading frame 53                                                          | 0.7499 | 0.0023 |
| 239208_s_at | C21orf57  | Chromosome 21 open reading frame 57                                                         | 0.3889 | 0.0272 |
| 239223_s_at | FBXL20    | F-box and leucine-rich repeat protein 20                                                    | 0.3539 | 0.0318 |
| 239228_at   |           | Transcribed locus                                                                           | 0.8688 | 0.0133 |
| 239231_at   |           | CDNA FLJ41910 fis; clone PEBLM2007834                                                       | 0.9208 | 0.0004 |
| 239233_at   | CCDC88A   | coiled-coil domain containing 88A                                                           | 0.7287 | 0.0203 |
| 239235_at   |           | Transcribed locus                                                                           | 0.1147 | 0.0485 |
| 239238_at   |           | Transcribed locus                                                                           | 1.0018 | 0.0025 |
| 239240_at   |           | Transcribed locus                                                                           | 0.9645 | 0      |
| 239243_at   | ZNF638    | Zinc finger protein 638                                                                     | 1.2661 | 0.0129 |
| 239245_at   |           | Transcribed locus                                                                           | 0.5497 | 0.0471 |
| 239251_at   |           | Transcribed locus                                                                           | 1.7939 | 0      |
| 239253_at   |           | Transcribed locus                                                                           | 0.5207 | 0.0121 |

|             |           |                                                                                                                                                                                           |        |        |
|-------------|-----------|-------------------------------------------------------------------------------------------------------------------------------------------------------------------------------------------|--------|--------|
| 239265_at   | TMEM20    | transmembrane protein 20                                                                                                                                                                  | 0.5253 | 0.045  |
| 239266_at   |           | Transcribed locus                                                                                                                                                                         | 0.5591 | 0.0016 |
| 239289_x_at | MTMR15    | myotubularin related protein 15                                                                                                                                                           | 0.8829 | 0.0025 |
| 239309_at   | DLX6      | distal-less homeobox 6                                                                                                                                                                    | 0.7249 | 0.0191 |
| 239333_x_at |           | CDNA FLJ30541 fis; clone BRAWH2001355                                                                                                                                                     | 0.252  | 0.0197 |
| 239339_at   |           | Transcribed locus                                                                                                                                                                         | 0.2246 | 0.0234 |
| 239343_at   | LOC728705 | hypothetical protein LOC728705                                                                                                                                                            | 1.1308 | 0.0003 |
| 239347_at   |           | Transcribed locus                                                                                                                                                                         | 0.4288 | 0.0022 |
| 239348_at   |           |                                                                                                                                                                                           | 0.7942 | 0.0062 |
| 239355_at   |           | Transcribed locus                                                                                                                                                                         | 0.426  | 0.0275 |
| 239358_at   |           | Transcribed locus                                                                                                                                                                         | 1.3094 | 0.023  |
| 239363_at   |           | Transcribed locus                                                                                                                                                                         | 0.8528 | 0.0111 |
| 239367_at   | BDNF      | brain-derived neurotrophic factor                                                                                                                                                         | 0.6376 | 0.0443 |
| 239376_at   |           | CDNA clone IMAGE:4333081                                                                                                                                                                  | 0.9237 | 0.0009 |
| 239377_at   | MGC11102  | hypothetical protein MGC11102                                                                                                                                                             | 0.5055 | 0.0141 |
| 239393_at   |           | Transcribed locus                                                                                                                                                                         | 0.7543 | 0.0073 |
| 239413_at   | CEP152    | centrosomal protein 152kDa                                                                                                                                                                | 1.1961 | 0.0047 |
| 239418_x_at |           | Transcribed locus                                                                                                                                                                         | 0.2618 | 0.0184 |
| 239423_at   |           |                                                                                                                                                                                           | 0.2563 | 0.0204 |
| 239429_at   |           | Transcribed locus                                                                                                                                                                         | 0.1612 | 0.0095 |
| 239432_at   | FLJ31306  | hypothetical protein FLJ31306                                                                                                                                                             | 0.7238 | 0.0177 |
| 239435_x_at | SHROOM1   | Shroom family member 1                                                                                                                                                                    | 1.3029 | 0.0017 |
| 239442_at   | CEP68     | centrosomal protein 68kDa                                                                                                                                                                 | 0.7694 | 0.0053 |
| 239448_at   |           | Transcribed locus                                                                                                                                                                         | 0.6153 | 0.0243 |
| 239462_at   | ZNF284    | zinc finger protein 284                                                                                                                                                                   | 0.4502 | 0.01   |
| 239465_at   |           | Transcribed locus; strongly similar to XP_523485.1 similar to Ubiquinol-cytochrome-c reductase complex core protein 2; mitochondrial precursor (Complex III subunit II) [Pan troglodytes] | 0.4035 | 0.0008 |
| 239478_x_at |           | Full-length cDNA clone CS0CAP006YP08 of Thymus of Homo sapiens (human)                                                                                                                    | 0.2135 | 0.0271 |
| 239481_at   | FAM133A   | family with sequence similarity 133; member A                                                                                                                                             | 1.6394 | 0.0174 |
| 239482_x_at | ZNF708    | zinc finger protein 708                                                                                                                                                                   | 0.7155 | 0.0071 |
| 239489_at   |           | Transcribed locus                                                                                                                                                                         | 0.4426 | 0.0102 |
| 239504_at   |           |                                                                                                                                                                                           | 0.2011 | 0.0232 |
| 239511_s_at | SFRS4     | splicing factor; arginine/serine-rich 4                                                                                                                                                   | 0.501  | 0.0053 |
| 239512_at   | SFRS4     | splicing factor; arginine/serine-rich 4                                                                                                                                                   | 0.7655 | 0.0245 |
| 239516_at   |           | Transcribed locus                                                                                                                                                                         | 1.7457 | 0.0001 |
| 239539_at   |           | Transcribed locus                                                                                                                                                                         | 0.2936 | 0.017  |
| 239540_at   |           |                                                                                                                                                                                           | 0.2976 | 0.0043 |
| 239545_at   |           | Transcribed locus                                                                                                                                                                         | 1.0218 | 0.0273 |

|             |          |                                                                                                |        |        |
|-------------|----------|------------------------------------------------------------------------------------------------|--------|--------|
| 239551_at   |          | Transcribed locus                                                                              | 0.207  | 0.0371 |
| 239557_at   |          | Transcribed locus                                                                              | 0.5585 | 0.0488 |
| 239559_at   |          | Partial unknown mRNA from drug-resistant melanoma cells; 3'UTR; clone DMS-9                    | 0.9297 | 0.0105 |
| 239561_at   |          | Transcribed locus                                                                              | 0.6237 | 0.0478 |
| 239576_at   | MTUS1    | Mitochondrial tumor suppressor 1                                                               | 0.9938 | 0.007  |
| 239596_at   | SLC30A7  | solute carrier family 30 (zinc transporter); member 7                                          | 0.2332 | 0.0174 |
| 239601_at   |          | Transcribed locus                                                                              | 0.2476 | 0.0012 |
| 239609_s_at | AGPAT7   | 1-acylglycerol-3-phosphate O-acyltransferase 7 (lysophosphatidic acid acyltransferase; eta)    | 0.3102 | 0.0023 |
| 239610_at   |          | Transcribed locus                                                                              | 0.1299 | 0.0167 |
| 239619_at   |          |                                                                                                | 1.9047 | 0.0009 |
| 239621_at   |          | Transcribed locus                                                                              | 0.2716 | 0.0126 |
| 239625_at   |          |                                                                                                | 0.1908 | 0.0111 |
| 239635_at   | TMEM137  | transmembrane protein 137                                                                      | 0.4451 | 0.0116 |
| 239644_at   |          | CDNA clone IMAGE:5275753                                                                       | 0.9207 | 0.0022 |
| 239646_at   |          | Transcribed locus                                                                              | 1.1005 | 0.01   |
| 239649_at   |          |                                                                                                | 0.3403 | 0.0022 |
| 239650_at   | NAP5     | Nck-associated protein 5                                                                       | 0.264  | 0.0154 |
| 239651_at   | ANAPC5   | anaphase promoting complex subunit 5                                                           | 0.8007 | 0.0001 |
| 239654_at   | CHD9     | Chromodomain helicase DNA binding protein 9                                                    | 1.4768 | 0.0004 |
| 239657_x_at |          |                                                                                                | 1.1492 | 0.0213 |
| 239679_at   |          |                                                                                                | 1.1425 | 0.0002 |
| 239680_at   |          |                                                                                                | 0.6688 | 0.0159 |
| 239682_at   |          | Full-length cDNA clone CS0DC024YB19 of Neuroblastoma Cot 25-normalized of Homo sapiens (human) | 0.5983 | 0.0363 |
| 239697_x_at | FLJ42117 | FLJ42117 protein                                                                               | 0.7994 | 0.0017 |
| 239699_s_at | PMS2L1   | postmeiotic segregation increased 2-like 1                                                     | 0.2298 | 0.0364 |
| 239716_at   |          | Transcribed locus                                                                              | 0.4434 | 0.0332 |
| 239721_at   |          |                                                                                                | 1.2081 | 0.0001 |
| 239729_at   |          | Transcribed locus                                                                              | 0.224  | 0.019  |
| 239735_at   |          | MRNA (fetal brain cDNA g6_1g)                                                                  | 1.1452 | 0      |
| 239748_x_at | OCIAD1   | OCIA domain containing 1                                                                       | 0.4286 | 0.0028 |
| 239760_at   |          | CDNA FLJ30257 fis; clone BRACE2002467                                                          | 0.3074 | 0.0055 |
| 239764_at   |          | MRNA; cDNA DKFZp686D1113 (from clone DKFZp686D1113)                                            | 0.8185 | 0.019  |
| 239771_at   | CAND1    | cullin-associated and neddylation-dissociated 1                                                | 1.206  | 0.007  |
| 239773_at   | GTPBP10  | GTP-binding protein 10 (putative)                                                              | 0.2468 | 0.0104 |
| 239790_s_at |          | Transcribed locus                                                                              | 0.2939 | 0.0006 |
| 239801_at   |          |                                                                                                | 0.3187 | 0.0234 |

|             |           |                                                                                      |        |        |
|-------------|-----------|--------------------------------------------------------------------------------------|--------|--------|
| 239811_at   |           |                                                                                      | 1.1552 | 0      |
| 239830_at   |           |                                                                                      | 0.3725 | 0.0217 |
| 239831_at   | TMEM106C  | Transmembrane protein 106C                                                           | 0.5134 | 0.0177 |
| 239832_at   |           | Transcribed locus                                                                    | 1.0187 | 0.0083 |
| 239839_at   | ZNF555    | zinc finger protein 555                                                              | 0.3006 | 0.0058 |
| 239841_at   |           | Transcribed locus                                                                    | 0.9068 | 0.0001 |
| 239842_x_at |           | Transcribed locus                                                                    | 0.7862 | 0.0014 |
| 239843_at   | RIT1      | Ras-like without CAAX 1                                                              | 0.7406 | 0.0356 |
| 239851_at   |           |                                                                                      | 0.1952 | 0.0336 |
| 239853_at   | KLC3      | kinesin light chain 3                                                                | 0.3395 | 0.0168 |
| 239857_at   |           | CDNA FLJ37227 fis; clone BRAMY2000277                                                | 0.191  | 0.0133 |
| 239863_at   |           | CDNA FLJ43322 fis; clone NT2RI2027975                                                | 0.5312 | 0.0138 |
| 239886_at   |           | Transcribed locus                                                                    | 0.3978 | 0.021  |
| 239892_at   |           | Transcribed locus                                                                    | 0.7595 | 0.0032 |
| 239895_at   | AQR       | Aquarius homolog (mouse)                                                             | 0.1911 | 0.0349 |
| 239900_x_at |           |                                                                                      | 0.2741 | 0.0032 |
| 239902_at   |           | Transcribed locus                                                                    | 0.1062 | 0.0254 |
| 239906_at   |           | Transcribed locus                                                                    | 0.526  | 0.0157 |
| 239917_at   | VPS8      | Vacuolar protein sorting 8 homolog ( <i>S. cerevisiae</i> )                          | 0.5104 | 0.0476 |
| 239924_at   | LOC91316  | Similar to bK246H3.1 (immunoglobulin lambda-like polypeptide 1; pre-B-cell specific) | 0.1926 | 0.0212 |
| 239946_at   |           | Transcribed locus                                                                    | 0.4996 | 0.0104 |
| 239950_at   | HOXA11S   | homeo box A11; antisense                                                             | 0.4756 | 0.0309 |
| 239954_at   | ZNF160    | zinc finger protein 160                                                              | 1.5616 | 0.0008 |
| 239960_x_at | LYRM7     | Lym7 homolog (mouse)                                                                 | 0.4996 | 0.014  |
| 239963_at   |           | Transcribed locus                                                                    | 0.4073 | 0.0334 |
| 239965_at   | LOC151878 | hypothetical protein LOC151878                                                       | 0.6855 | 0.0281 |
| 239969_at   |           | Transcribed locus                                                                    | 0.5105 | 0.0075 |
| 239991_at   |           | Transcribed locus                                                                    | 0.8031 | 0.0018 |
| 240000_at   |           | Transcribed locus                                                                    | 0.3003 | 0.0023 |
| 240011_at   | TTBK2     | Tau tubulin kinase 2                                                                 | 0.1875 | 0.0272 |
| 240026_x_at |           | Transcribed locus                                                                    | 0.661  | 0.0003 |
| 240046_at   |           |                                                                                      | 0.696  | 0.0004 |
| 240052_at   | ITPR1     | inositol 1;4;5-triphosphate receptor; type 1                                         | 0.8766 | 0.0246 |
| 240063_at   | LOC441046 | glucuronidase; beta pseudogene                                                       | 0.293  | 0.0456 |
| 240075_at   |           | CDNA FLJ31291 fis; clone KIDNE2007356                                                | 0.9888 | 0.0332 |
| 240080_at   |           |                                                                                      | 0.2069 | 0.0483 |
| 240094_at   |           |                                                                                      | 0.4097 | 0.0153 |
| 240105_at   |           | Transcribed locus                                                                    | 1.3922 | 0.0014 |

|             |           |                                                                                                  |        |        |
|-------------|-----------|--------------------------------------------------------------------------------------------------|--------|--------|
| 240111_at   | RHOBTB3   | Rho-related BTB domain containing 3                                                              | 1.3602 | 0.0005 |
| 240121_x_at |           | Homo sapiens; Similar to LOC148188; clone IMAGE:3867353; mRNA                                    | 0.6702 | 0.0205 |
| 240128_at   |           | Transcribed locus                                                                                | 0.4857 | 0.0131 |
| 240139_at   |           | Transcribed locus                                                                                | 0.3302 | 0.0023 |
| 240141_at   |           |                                                                                                  | 0.8071 | 0.0074 |
| 240143_at   |           |                                                                                                  | 0.6022 | 0.0439 |
| 240145_at   |           | Transcribed locus; weakly similar to NP_149931.1 dehydrogenase subunit 1 [Trichosurus vulpecula] | 0.1883 | 0.0454 |
| 240146_at   |           |                                                                                                  | 1.1614 | 0.0039 |
| 240155_x_at | ZNF493    | zinc finger protein 493, zinc finger protein 738                                                 | 1.2087 | 0.0041 |
| 240157_at   |           | Transcribed locus                                                                                | 1.8284 | 0.008  |
| 240166_x_at | RG9MTD3   | RNA (guanine-9-) methyltransferase domain containing 3                                           | 0.4068 | 0.0119 |
| 240168_at   | XPO7      | exportin 7                                                                                       | 0.5042 | 0.0155 |
| 240172_at   | ERGIC2    | ERGIC and golgi 2                                                                                | 0.8551 | 0.0007 |
| 240174_at   |           | Transcribed locus                                                                                | 0.2772 | 0.0105 |
| 240176_at   |           | Clone HLS_IMAGE_506551 mRNA sequence                                                             | 0.343  | 0.0165 |
| 240205_x_at |           |                                                                                                  | 0.4719 | 0.0054 |
| 240206_at   | TARS      | Threonyl-tRNA synthetase                                                                         | 0.4877 | 0.0116 |
| 240222_at   |           | Transcribed locus; weakly similar to XP_001480255.1 similar to pORF2 [Mus musculus]              | 0.1839 | 0.0021 |
| 240234_at   |           | Transcribed locus                                                                                | 0.3577 | 0.033  |
| 240239_at   | ZNF566    | zinc finger protein 566                                                                          | 1.2805 | 0      |
| 240247_at   |           |                                                                                                  | 0.8444 | 0.0016 |
| 240248_at   |           | Transcribed locus                                                                                | 0.3632 | 0.0093 |
| 240254_at   |           |                                                                                                  | 0.4329 | 0.0415 |
| 240258_at   | ENO1      | enolase 1; (alpha)                                                                               | 0.4924 | 0.0058 |
| 240263_at   |           | Transcribed locus                                                                                | 1.4129 | 0.0088 |
| 240269_at   |           | Transcribed locus                                                                                | 0.2791 | 0.0093 |
| 240270_x_at |           | CDNA FLJ26264 fis; clone DMC05506                                                                | 0.121  | 0.0438 |
| 240297_at   |           | Transcribed locus                                                                                | 1.1931 | 0.0038 |
| 240309_at   |           | Transcribed locus                                                                                | 0.2497 | 0.0046 |
| 240314_at   |           | Full length insert cDNA clone ZE12G01                                                            | 0.6776 | 0.0356 |
| 240324_at   |           |                                                                                                  | 0.407  | 0.0037 |
| 240335_at   | SLC35F5   | Solute carrier family 35; member F5                                                              | 0.1864 | 0.008  |
| 240339_at   |           | Transcribed locus                                                                                | 0.4754 | 0.0007 |
| 240344_x_at | LYRM7     | Lyrm7 homolog (mouse)                                                                            | 1.4642 | 0      |
| 240351_at   |           |                                                                                                  | 0.1287 | 0.0445 |
| 240365_at   | LOC647946 | hypothetical protein LOC647946                                                                   | 0.3744 | 0.0002 |

|             |           |                                                                                                               |        |        |
|-------------|-----------|---------------------------------------------------------------------------------------------------------------|--------|--------|
| 240370_at   |           | Transcribed locus                                                                                             | 0.357  | 0.0169 |
| 240392_at   |           | MRNA; cDNA DKFZp667J0523 (from clone DKFZp667J0523)                                                           | 0.5495 | 0.0314 |
| 240417_at   |           | Transcribed locus                                                                                             | 0.2245 | 0.0018 |
| 240442_at   |           |                                                                                                               | 0.1941 | 0.0151 |
| 240449_at   | ZNF341    | zinc finger protein 341                                                                                       | 0.2753 | 0.012  |
| 240472_at   |           | MRNA; cDNA DKFZp761N2217 (from clone DKFZp761N2217)                                                           | 0.1383 | 0.0171 |
| 240482_at   |           |                                                                                                               | 0.3944 | 0.0096 |
| 240485_at   |           |                                                                                                               | 0.3807 | 0      |
| 240494_at   |           | Transcribed locus                                                                                             | 0.1469 | 0.0327 |
| 240513_at   | PCID1     | PCI domain containing 1 (herpesvirus entry mediator)                                                          | 0.1618 | 0.0315 |
| 240518_at   | LOC729291 | hypothetical protein LOC729291                                                                                | 0.4398 | 0.0014 |
| 240521_at   |           |                                                                                                               | 0.2578 | 0.0076 |
| 240528_s_at | EXOC4     | exocyst complex component 4                                                                                   | 0.9232 | 0.0008 |
| 240529_at   |           |                                                                                                               | 0.4679 | 0.0041 |
| 240538_at   |           | Transcribed locus                                                                                             | 0.6339 | 0.0003 |
| 240549_at   |           |                                                                                                               | 0.5198 | 0.0256 |
| 240551_at   | ZBTB45    | zinc finger and BTB domain containing 45                                                                      | 0.3545 | 0.001  |
| 240554_at   | AKAP8L    | A kinase (PRKA) anchor protein 8-like                                                                         | 0.3191 | 0.0026 |
| 240557_at   |           | CDNA FLJ41867 fis; clone OCBBF2005546                                                                         | 1.1036 | 0.0011 |
| 240565_at   | ZFP28     | zinc finger protein 28 homolog (mouse)                                                                        | 0.1481 | 0.0403 |
| 240573_at   | LOC374443 | CLR pseudogene                                                                                                | 0.1728 | 0.0095 |
| 240574_at   |           | CDNA clone IMAGE:5262677                                                                                      | 0.8516 | 0.0433 |
| 240579_at   | NAG       | neuroblastoma-amplified protein                                                                               | 0.2022 | 0.038  |
| 240592_at   | LCORL     | ligand dependent nuclear receptor corepressor-like                                                            | 1.4077 | 0      |
| 240593_x_at |           | Transcribed locus                                                                                             | 0.4577 | 0.0166 |
| 240594_at   |           | Transcribed locus                                                                                             | 0.6283 | 0.044  |
| 240601_at   |           | Transcribed locus                                                                                             | 0.7279 | 0.0026 |
| 240622_at   |           |                                                                                                               | 0.1168 | 0.0311 |
| 240627_x_at |           | Transcribed locus; strongly similar to XP_0011101574.1 similar to KIAA1826 protein isoform 2 [Macaca mulatta] | 0.2758 | 0.0029 |
| 240637_at   | WDR41     | WD repeat domain 41                                                                                           | 0.3079 | 0.0023 |
| 240656_at   |           | Transcribed locus                                                                                             | 0.4017 | 0.0224 |
| 240659_x_at |           |                                                                                                               | 0.5353 | 0.0001 |
| 240703_s_at | HERC1     | hect (homologous to the E6-AP (UBE3A) carboxyl terminus) domain and RCC1 (CHC1)-like domain (RLD) 1           | 0.4312 | 0.0013 |
| 240733_at   |           | Transcribed locus                                                                                             | 0.3628 | 0.0176 |
| 240738_at   |           | Transcribed locus                                                                                             | 0.202  | 0.0329 |
| 240751_at   |           | Transcribed locus                                                                                             | 0.1857 | 0.0028 |



|             |         |                                                                                                              |        |        |
|-------------|---------|--------------------------------------------------------------------------------------------------------------|--------|--------|
| 240757_at   | CLASP1  | Cytoplasmic linker associated protein 1                                                                      | 0.1664 | 0.0186 |
| 240759_at   |         |                                                                                                              | 0.3952 | 0.0489 |
| 240776_at   |         |                                                                                                              | 0.111  | 0.0416 |
| 240787_at   |         |                                                                                                              | 0.1592 | 0.0056 |
| 240788_at   |         | Transcribed locus                                                                                            | 0.8902 | 0.0395 |
| 240789_at   |         |                                                                                                              | 0.2459 | 0.0248 |
| 240798_at   |         |                                                                                                              | 0.7204 | 0.0116 |
| 240800_x_at |         | Transcribed locus                                                                                            | 0.2641 | 0.0062 |
| 240824_at   |         | Transcribed locus                                                                                            | 1.1176 | 0.0006 |
| 240829_at   |         |                                                                                                              | 0.6565 | 0.0186 |
| 240839_at   |         | Transcribed locus                                                                                            | 0.1207 | 0.0279 |
| 240846_at   | PCBD2   | pterin-4 alpha-carbinolamine dehydratase/dimerization cofactor of hepatocyte nuclear factor 1 alpha (TCF1) 2 | 0.2222 | 0.0009 |
| 240859_at   | ZFYVE16 | zinc finger; FYVE domain containing 16                                                                       | 0.4929 | 0.0307 |
| 240865_at   |         |                                                                                                              | 0.8187 | 0.0068 |
| 240906_at   |         |                                                                                                              | 0.2411 | 0.0012 |
| 240908_at   |         | CDNA FLJ37304 fis; clone BRAMY2016070                                                                        | 0.7375 | 0.0034 |
| 240910_at   |         | Transcribed locus                                                                                            | 1.2601 | 0.0171 |
| 240912_x_at | TMEM84  | transmembrane protein 84                                                                                     | 0.2624 | 0.0211 |
| 240928_at   |         | CDNA FLJ32498 fis; clone SKNSH2000319                                                                        | 0.4377 | 0.0149 |
| 240934_at   |         |                                                                                                              | 0.3526 | 0.0181 |
| 240939_x_at |         | Transcribed locus                                                                                            | 0.4471 | 0.0049 |
| 240965_at   |         |                                                                                                              | 0.1318 | 0.0182 |
| 241018_at   | TMEM59  | transmembrane protein 59                                                                                     | 0.202  | 0.0349 |
| 241065_x_at | CMAS    | Cytidine monophosphate N-acetylneuraminic acid synthetase                                                    | 0.6331 | 0.0001 |
| 241066_at   | ZNF449  | zinc finger protein 449                                                                                      | 0.1719 | 0.0052 |
| 241106_at   |         |                                                                                                              | 0.1357 | 0.0426 |
| 241164_at   |         | Transcribed locus                                                                                            | 0.4116 | 0      |
| 241223_x_at |         | Transcribed locus; weakly similar to NP_001013658.1 protein LOC387873 [Homo sapiens]                         | 0.3967 | 0.0095 |
| 241226_at   |         | Transcribed locus                                                                                            | 0.1957 | 0.0144 |
| 241235_at   |         |                                                                                                              | 0.1468 | 0.0029 |
| 241241_at   | RPS14   | Ribosomal protein S14                                                                                        | 0.3899 | 0.0044 |
| 241252_at   | ESCO2   | establishment of cohesion 1 homolog 2 (S. cerevisiae)                                                        | 0.1204 | 0.0416 |
| 241268_x_at |         |                                                                                                              | 0.2484 | 0.0121 |
| 241303_x_at |         |                                                                                                              | 0.3019 | 0.0338 |
| 241328_at   | ZMAT1   | zinc finger; matrin type 1                                                                                   | 0.144  | 0.0128 |
| 241330_x_at |         |                                                                                                              | 0.1019 | 0.0071 |
| 241342_at   | TMEM65  | transmembrane protein 65                                                                                     | 1.4335 | 0.0041 |

|             |           |                                                                                                                               |        |        |
|-------------|-----------|-------------------------------------------------------------------------------------------------------------------------------|--------|--------|
| 241345_at   | ZRANB2    | zinc finger; RAN-binding domain containing 2                                                                                  | 0.4671 | 0.0273 |
| 241366_at   | RBAK      | RB-associated KRAB zinc finger                                                                                                | 0.7379 | 0.0083 |
| 241371_at   |           |                                                                                                                               | 0.5351 | 0.0244 |
| 241385_at   | LARP7     | La ribonucleoprotein domain family; member 7                                                                                  | 0.8862 | 0.0143 |
| 241386_at   |           | Transcribed locus                                                                                                             | 0.796  | 0.0011 |
| 241387_at   |           | Transcribed locus                                                                                                             | 0.582  | 0.0386 |
| 241388_at   |           | CDNA FLJ40566 fis; clone THYMU2004733                                                                                         | 0.7693 | 0.0034 |
| 241393_at   | IPP       | Intracisternal A particle-promoted polypeptide                                                                                | 0.3812 | 0.0367 |
| 241413_at   |           | Transcribed locus                                                                                                             | 0.6536 | 0.0182 |
| 241466_at   |           | Transcribed locus                                                                                                             | 0.2092 | 0.0206 |
| 241468_at   |           | Full length insert cDNA YU76E12                                                                                               | 0.1827 | 0.0143 |
| 241472_at   | DMXL1     | Dmx-like 1                                                                                                                    | 0.6753 | 0.0055 |
| 241487_at   |           | CDNA clone IMAGE:4792502                                                                                                      | 0.2032 | 0.0065 |
| 241489_at   |           | Transcribed locus                                                                                                             | 1.0536 | 0.0002 |
| 241492_at   |           | Transcribed locus                                                                                                             | 0.2193 | 0.0276 |
| 241508_at   |           |                                                                                                                               | 0.3042 | 0.0273 |
| 241509_at   |           |                                                                                                                               | 1.3912 | 0.0121 |
| 241569_at   |           | Transcribed locus                                                                                                             | 0.1257 | 0.0334 |
| 241599_at   | LSM11     | LSM11; U7 small nuclear RNA associated                                                                                        | 0.4595 | 0.0071 |
| 241611_s_at | FNDC3A    | fibronectin type III domain containing 3A                                                                                     | 0.126  | 0.0273 |
| 241613_at   |           | Transcribed locus; weakly similar to XP_001083900.1 similar to zinc finger CCHC-type and RNA binding motif 1 [Macaca mulatta] | 0.5342 | 0.0095 |
| 241624_at   | LOC389834 | hypothetical gene supported by AK123403                                                                                       | 0.2255 | 0.0302 |
| 241642_x_at | TLK1      | tousled-like kinase 1                                                                                                         | 0.2464 | 0.008  |
| 241658_at   |           | CDNA FLJ37332 fis; clone BRAMY2019710                                                                                         | 0.4588 | 0.0389 |
| 241680_at   |           |                                                                                                                               | 0.5471 | 0.0001 |
| 241688_at   |           | Transcribed locus                                                                                                             | 0.2274 | 0.0272 |
| 241692_at   |           | Transcribed locus                                                                                                             | 0.911  | 0.033  |
| 241704_x_at | ZNF320    | zinc finger protein 320                                                                                                       | 0.4848 | 0.0012 |
| 241713_s_at | DYX1C1    | dyslexia susceptibility 1 candidate 1                                                                                         | 0.2698 | 0.0426 |
| 241718_x_at |           | Transcribed locus                                                                                                             | 0.2548 | 0.0205 |
| 241720_at   | ZNF326    | zinc finger protein 326                                                                                                       | 0.3527 | 0.0017 |
| 241723_at   | IQGAP2    | IQ motif containing GTPase activating protein 2                                                                               | 0.7957 | 0.0052 |
| 241724_x_at |           | Transcribed locus                                                                                                             | 0.2394 | 0.01   |
| 241727_x_at | DHFRL1    | dihydrofolate reductase-like 1                                                                                                | 0.5214 | 0.0003 |
| 241728_at   |           | Transcribed locus                                                                                                             | 0.2615 | 0.0184 |
| 241734_at   | SRFBP1    | serum response factor binding protein 1                                                                                       | 0.9871 | 0.0021 |

|             |           |                                                   |        |        |
|-------------|-----------|---------------------------------------------------|--------|--------|
| 241737_x_at |           | Transcribed locus                                 | 0.613  | 0.0024 |
| 241738_at   |           | Transcribed locus                                 | 0.2591 | 0.0014 |
| 241744_x_at |           | Transcribed locus                                 | 0.1245 | 0.0219 |
| 241751_at   | OFD1      | oral-facial-digital syndrome 1                    | 0.7566 | 0.0029 |
| 241755_at   | UQCRC2    | ubiquinol-cytochrome c reductase core protein II  | 1.1734 | 0.0013 |
| 241757_x_at | DYNC2LI1  | dynein; cytoplasmic 2; light intermediate chain 1 | 0.4674 | 0.0023 |
| 241774_at   |           | Transcribed locus                                 | 0.8827 | 0.0017 |
| 241775_at   |           | CDNA FLJ26437 fis; clone KDN02067                 | 0.7008 | 0.011  |
| 241777_x_at |           | Transcribed locus                                 | 0.3879 | 0.0106 |
| 241779_at   | MTX3      | metaxin 3                                         | 0.2763 | 0.0022 |
| 241790_at   |           | Transcribed locus                                 | 0.5985 | 0.0081 |
| 241794_at   | ACTR6     | ARP6 actin-related protein 6 homolog (yeast)      | 0.1136 | 0.0323 |
| 241798_at   |           |                                                   | 1.0573 | 0.0018 |
| 241804_at   |           | Transcribed locus                                 | 0.3144 | 0.015  |
| 241807_x_at |           | Transcribed locus                                 | 0.3522 | 0.0442 |
| 241808_at   |           | CDNA FLJ36977 fis; clone BRACE2006344             | 1.4259 | 0      |
| 241809_at   | C1orf183  | chromosome 1 open reading frame 183               | 0.1981 | 0.0354 |
| 241814_at   |           |                                                   | 0.1774 | 0.0086 |
| 241816_at   | C14orf106 | Chromosome 14 open reading frame 106              | 1.3116 | 0      |
| 241818_at   |           | Transcribed locus                                 | 0.2621 | 0.0338 |
| 241820_at   | RIF1      | RAP1 interacting factor homolog (yeast)           | 0.8078 | 0.0025 |
| 241826_x_at |           | Transcribed locus                                 | 0.3954 | 0.0406 |
| 241832_at   | FAM98A    | family with sequence similarity 98; member A      | 0.2092 | 0.0185 |
| 241836_x_at | LRRIQ2    | leucine-rich repeats and IQ motif containing 2    | 0.1689 | 0.0194 |
| 241837_at   |           |                                                   | 0.9286 | 0.044  |
| 241838_at   |           | Transcribed locus                                 | 1.285  | 0.0049 |
| 241845_at   |           |                                                   | 0.3109 | 0.0161 |
| 241867_at   |           | Transcribed locus                                 | 0.6566 | 0.0181 |
| 241885_at   |           | Transcribed locus                                 | 0.6302 | 0.0143 |
| 241903_at   |           | Transcribed locus                                 | 1.193  | 0.0203 |
| 241906_at   |           |                                                   | 1.3212 | 0.0003 |
| 241913_at   |           | Transcribed locus                                 | 0.2729 | 0.0034 |
| 241928_at   |           | Transcribed locus                                 | 0.2758 | 0.0136 |
| 241929_at   |           | Transcribed locus                                 | 1.6666 | 0.0069 |
| 241936_x_at |           | Transcribed locus                                 | 1.1734 | 0.0001 |
| 241941_at   |           | Transcribed locus                                 | 0.7164 | 0.0009 |
| 241948_at   |           | Transcribed locus                                 | 0.7755 | 0.0033 |
| 241954_at   | FDFT1     | Farnesyl-diphosphate farnesyltransferase 1        | 1.9324 | 0.0032 |

|             |           |                                                                                                |        |        |
|-------------|-----------|------------------------------------------------------------------------------------------------|--------|--------|
| 241957_x_at | LIN7B     | lin-7 homolog B (C. elegans)                                                                   | 0.8898 | 0.0004 |
| 241970_at   |           | Transcribed locus                                                                              | 0.8915 | 0.0126 |
| 241973_x_at | DPP7      | Dipeptidyl-peptidase 7                                                                         | 0.238  | 0.0263 |
| 241988_x_at |           | Transcribed locus; weakly similar to XP_001091208.1 hypothetical protein [Macaca mulatta]      | 0.2416 | 0.0203 |
| 241993_x_at |           | Transcribed locus                                                                              | 0.5232 | 0.0043 |
| 242006_at   | LCA5      | Leber congenital amaurosis 5                                                                   | 0.3975 | 0.0073 |
| 242016_at   |           | Transcribed locus; weakly similar to XP_517655.1 similar to KIAA0825 protein [Pan troglodytes] | 0.5118 | 0.0172 |
| 242017_at   | ZNF654    | zinc finger protein 654                                                                        | 0.2817 | 0.0068 |
| 242018_at   |           | Transcribed locus                                                                              | 0.1326 | 0.035  |
| 242019_at   | LASS6     | LAG1 homolog; ceramide synthase 6                                                              | 0.5844 | 0.0202 |
| 242023_at   | ABHD4     | Abhydrolase domain containing 4                                                                | 0.3482 | 0.0339 |
| 242024_at   |           | Transcribed locus                                                                              | 0.97   | 0.0003 |
| 242028_at   | ZNF709    | zinc finger protein 709                                                                        | 0.7028 | 0.0149 |
| 242041_at   | CSPP1     | centrosome and spindle pole associated protein 1                                               | 0.3472 | 0.0151 |
| 242052_at   |           | CDNA FLJ31445 fis; clone NT2NE2000864                                                          | 1.9652 | 0.0005 |
| 242059_at   |           | Transcribed locus                                                                              | 0.6979 | 0.0478 |
| 242077_x_at | C6orf150  | chromosome 6 open reading frame 150                                                            | 0.1938 | 0.0277 |
| 242080_at   |           |                                                                                                | 0.6699 | 0.0023 |
| 242091_at   | ZNF720    | zinc finger protein 720                                                                        | 0.2248 | 0.0279 |
| 242108_at   |           | MRNA; cDNA DKFZp686F1782 (from clone DKFZp686F1782)                                            | 1.7568 | 0      |
| 242110_at   |           | Transcribed locus                                                                              | 1.2942 | 0.0003 |
| 242111_at   | METTL3    | methyltransferase like 3                                                                       | 1.2534 | 0.0002 |
| 242112_at   | LSM11     | LSM11; U7 small nuclear RNA associated                                                         | 0.2858 | 0.015  |
| 242113_at   |           | Transcribed locus                                                                              | 0.3087 | 0.0049 |
| 242115_at   |           |                                                                                                | 0.137  | 0.0016 |
| 242133_s_at | LOC654342 | Similar to lymphocyte-specific protein 1                                                       | 0.9413 | 0.0018 |
| 242139_s_at |           |                                                                                                | 0.8714 | 0.0385 |
| 242144_at   |           |                                                                                                | 1.1833 | 0.0037 |
| 242146_at   | SNRPA1    | Small nuclear ribonucleoprotein polypeptide A'                                                 | 1.2346 | 0.0078 |
| 242154_x_at | PPIL5     | peptidylprolyl isomerase (cyclophilin)-like 5                                                  | 0.2274 | 0.004  |
| 242167_at   |           |                                                                                                | 0.2857 | 0.014  |
| 242171_at   |           |                                                                                                | 0.4306 | 0.0378 |
| 242182_x_at |           | Transcribed locus                                                                              | 0.2773 | 0.0063 |
| 242189_at   |           |                                                                                                | 0.3023 | 0.0206 |
| 242191_at   | NBPF10    | neuroblastoma breakpoint family; member 10, neuroblastoma breakpoint family; member 11         | 2.0015 | 0.0001 |

|             |          |                                                                                         |        |        |
|-------------|----------|-----------------------------------------------------------------------------------------|--------|--------|
| 242201_at   | PMS2L5   | Postmeiotic segregation increased 2-like 5                                              | 1.1104 | 0.0002 |
| 242202_at   |          | CDNA clone IMAGE:5302136                                                                | 0.2399 | 0.0007 |
| 242208_at   |          | CDNA FLJ41303 fis; clone BRAMY2042131                                                   | 0.5947 | 0.0038 |
| 242216_at   |          | Transcribed locus                                                                       | 0.5217 | 0.0091 |
| 242224_at   | GPATCH2  | G patch domain containing 2                                                             | 0.8616 | 0.0064 |
| 242225_at   |          | Transcribed locus                                                                       | 1.9403 | 0      |
| 242228_at   |          |                                                                                         | 0.783  | 0.0107 |
| 242229_at   | NAPE-PLD | N-acyl-phosphatidylethanolamine-hydrolyzing phospholipase D                             | 0.5936 | 0.008  |
| 242233_at   |          | Transcribed locus                                                                       | 1.073  | 0.0006 |
| 242235_x_at | NRD1     | Nardilysin (N-arginine dibasic convertase)                                              | 0.5607 | 0.0007 |
| 242241_x_at |          | Transcribed locus                                                                       | 0.3802 | 0.0001 |
| 242248_at   | PHKB     | phosphorylase kinase; beta                                                              | 0.5913 | 0.003  |
| 242251_at   |          | Transcribed locus                                                                       | 0.5637 | 0.0074 |
| 242260_at   | MATR3    | Matrin 3                                                                                | 0.6605 | 0.0081 |
| 242261_at   |          |                                                                                         | 0.7963 | 0.0044 |
| 242265_at   | BRD8     | Bromodomain containing 8                                                                | 0.4705 | 0.0002 |
| 242272_at   | ZNF785   | zinc finger protein 785                                                                 | 0.7832 | 0.0073 |
| 242282_at   | ZFPM1    | zinc finger protein; multitype 1                                                        | 1.1568 | 0.0038 |
| 242287_at   |          |                                                                                         | 0.6719 | 0.0086 |
| 242293_at   | ING3     | inhibitor of growth family; member 3                                                    | 0.7462 | 0.0047 |
| 242307_at   | ZNF789   | zinc finger protein 789                                                                 | 0.1792 | 0.038  |
| 242309_at   |          | Transcribed locus                                                                       | 0.3028 | 0.0008 |
| 242310_at   |          | Transcribed locus                                                                       | 1.6317 | 0.0001 |
| 242323_at   |          | Full-length cDNA clone CS0DF027YF17 of Fetal brain of Homo sapiens (human)              | 0.6221 | 0.0421 |
| 242325_at   | YWHAH    | Tyrosine 3-monooxygenase/tryptophan 5-monooxygenase activation protein; eta polypeptide | 0.1215 | 0.027  |
| 242328_at   |          |                                                                                         | 0.3009 | 0.0306 |
| 242336_at   |          | MRNA; cDNA DKFZp686L15210 (from clone DKFZp686L15210)                                   | 0.3987 | 0.0261 |
| 242337_at   |          | Transcribed locus                                                                       | 0.355  | 0.0143 |
| 242343_x_at |          |                                                                                         | 1.985  | 0      |
| 242347_at   |          | CDNA clone IMAGE:4715948                                                                | 0.1824 | 0.0371 |
| 242349_at   | HECTD1   | HECT domain containing 1                                                                | 0.6708 | 0.0199 |
| 242352_at   | NIPBL    | Nipped-B homolog (Drosophila)                                                           | 1.1782 | 0.0011 |
| 242357_x_at |          |                                                                                         | 0.3841 | 0.0033 |
| 242369_x_at |          | MRNA; cDNA DKFZp313O038 (from clone DKFZp313O038)                                       | 0.6344 | 0.0016 |
| 242389_at   |          | CDNA FLJ33355 fis; clone BRACE2005151                                                   | 0.6685 | 0.0198 |

|             |           |                                                                                                                                              |        |        |
|-------------|-----------|----------------------------------------------------------------------------------------------------------------------------------------------|--------|--------|
| 242393_x_at | BMS1P5    | BMS1 pseudogene 5, centaurin; gamma-like family; member 2, centaurin; gamma-like family; member 9 pseudogene, hypothetical protein LOC643564 | 0.4505 | 0.0212 |
| 242398_x_at |           | Transcribed locus                                                                                                                            | 0.2456 | 0.0035 |
| 242417_at   | LOC283278 | hypothetical protein LOC283278                                                                                                               | 0.219  | 0.0354 |
| 242418_at   | LOC730719 | similar to Protein neurobeachin (Lysosomal trafficking regulator 2) (Protein BCL8B)                                                          | 0.573  | 0.0051 |
| 242422_at   |           | Full-length cDNA clone CS0DL005YA15 of B cells (Ramos cell line) Cot 25-normalized of Homo sapiens (human)                                   | 0.3138 | 0.0332 |
| 242423_x_at |           | Homo sapiens; clone IMAGE:4346533; mRNA                                                                                                      | 0.8002 | 0.0035 |
| 242424_at   |           | Transcribed locus                                                                                                                            | 1.2915 | 0      |
| 242426_at   | NRG4      | neuregulin 4                                                                                                                                 | 0.2426 | 0.0244 |
| 242429_at   | ZNF567    | zinc finger protein 567                                                                                                                      | 1.2025 | 0.0021 |
| 242436_at   |           | Transcribed locus                                                                                                                            | 0.2659 | 0.0476 |
| 242438_at   |           |                                                                                                                                              | 0.9158 | 0.0299 |
| 242439_s_at |           |                                                                                                                                              | 0.5308 | 0.039  |
| 242448_at   |           | CDNA FLJ33367 fis; clone BRACE2005661                                                                                                        | 1.0959 | 0.0001 |
| 242449_at   |           | Transcribed locus                                                                                                                            | 0.4034 | 0.0023 |
| 242453_at   |           | Transcribed locus                                                                                                                            | 0.2349 | 0.0165 |
| 242456_at   | MRE11A    | MRE11 meiotic recombination 11 homolog A (S. cerevisiae)                                                                                     | 0.3098 | 0.0055 |
| 242458_at   | RALGPS2   | Ral GEF with PH domain and SH3 binding motif 2                                                                                               | 0.3458 | 0.0342 |
| 242463_x_at | ZNF600    | zinc finger protein 600                                                                                                                      | 0.836  | 0.0051 |
| 242470_at   | EID2B     | EP300 interacting inhibitor of differentiation 2B                                                                                            | 1.0867 | 0.0018 |
| 242474_s_at | LOC203547 | hypothetical protein LOC203547                                                                                                               | 0.2125 | 0.0463 |
| 242476_at   |           | Transcribed locus                                                                                                                            | 1.6245 | 0.0047 |
| 242477_at   | C9orf52   | chromosome 9 open reading frame 52                                                                                                           | 0.194  | 0.0359 |
| 242486_at   |           | Transcribed locus                                                                                                                            | 0.4308 | 0.0002 |
| 242490_at   |           |                                                                                                                                              | 0.8683 | 0      |
| 242492_at   |           |                                                                                                                                              | 0.4236 | 0.0257 |
| 242512_at   | MYO9A     | myosin IXA                                                                                                                                   | 1.0343 | 0.0011 |
| 242513_x_at | KIAA2018  | KIAA2018                                                                                                                                     | 0.1643 | 0.0032 |
| 242514_at   |           | Transcribed locus                                                                                                                            | 0.3736 | 0.0182 |
| 242517_at   | KISS1R    | KISS1 receptor                                                                                                                               | 1.54   | 0.0447 |
| 242518_at   |           | CDNA FLJ43403 fis; clone OCBBF2016612                                                                                                        | 0.6214 | 0.0005 |
| 242522_at   |           | Transcribed locus                                                                                                                            | 0.1188 | 0.0241 |
| 242523_at   |           | Transcribed locus                                                                                                                            | 0.7326 | 0.0268 |
| 242526_at   |           | Transcribed locus                                                                                                                            | 0.1118 | 0.0099 |
| 242537_at   |           |                                                                                                                                              | 0.1929 | 0.0111 |

|             |           |                                                                                            |        |        |
|-------------|-----------|--------------------------------------------------------------------------------------------|--------|--------|
| 242539_at   | LOC730069 | nuclear receptor binding factor 2 pseudogene, similar to nuclear receptor binding factor 2 | 1.0489 | 0.0117 |
| 242546_at   | FLJ39632  | hypothetical LOC642477                                                                     | 2.412  | 0.0002 |
| 242555_at   | LOC388272 | similar to RIKEN cDNA 4921524J17                                                           | 0.1994 | 0.0449 |
| 242560_at   | FANCD2    | Fanconi anemia; complementation group D2                                                   | 1.5734 | 0.0001 |
| 242564_at   |           | Full length insert cDNA clone ZD66G01                                                      | 0.5993 | 0.0055 |
| 242565_x_at | C21orf57  | Chromosome 21 open reading frame 57                                                        | 0.5103 | 0.0163 |
| 242584_at   | FLJ13305  | hypothetical protein FLJ13305                                                              | 1.411  | 0.0032 |
| 242586_at   | FSD1L     | fibronectin type III and SPRY domain containing 1-like                                     | 1.413  | 0.0006 |
| 242592_at   | GPR137C   | G protein-coupled receptor 137C                                                            | 0.6393 | 0.0007 |
| 242602_x_at | ZNF254    | zinc finger protein 254                                                                    | 0.5219 | 0.0088 |
| 242609_x_at |           | Transcribed locus                                                                          | 0.5383 | 0      |
| 242612_at   | NPEPPS    | aminopeptidase puromycin sensitive                                                         | 0.7255 | 0.0134 |
| 242621_at   | ZNF498    | zinc finger protein 498                                                                    | 0.3149 | 0.0179 |
| 242628_at   |           | Transcribed locus                                                                          | 0.66   | 0.0035 |
| 242633_x_at |           |                                                                                            | 0.5898 | 0      |
| 242635_s_at | NAPE-PLD  | N-acyl-phosphatidylethanolamine-hydrolyzing phospholipase D                                | 0.6801 | 0.0064 |
| 242637_at   |           | Transcribed locus                                                                          | 0.6818 | 0.0024 |
| 242640_at   | C19orf55  | chromosome 19 open reading frame 55                                                        | 0.4244 | 0      |
| 242645_at   |           | Full length insert cDNA clone YR92A01                                                      | 0.4151 | 0.0199 |
| 242655_at   |           | Transcribed locus                                                                          | 0.5814 | 0.0014 |
| 242662_at   | PCSK6     | Proprotein convertase subtilisin/kexin type 6                                              | 1.6828 | 0.0107 |
| 242663_at   | LOC148189 | Hypothetical protein LOC148189                                                             | 0.4278 | 0.0001 |
| 242673_at   |           | Transcribed locus                                                                          | 1.5163 | 0.0004 |
| 242679_at   |           | CDNA clone IMAGE:5272988                                                                   | 0.3205 | 0.0175 |
| 242691_at   |           | CDNA FLJ41369 fis; clone BRCAN2006117                                                      | 1.2632 | 0.0375 |
| 242693_at   |           | Transcribed locus                                                                          | 0.8009 | 0.0008 |
| 242696_at   |           | Transcribed locus                                                                          | 0.5463 | 0.0112 |
| 242706_s_at | MED23     | mediator complex subunit 23                                                                | 0.8901 | 0.0484 |
| 242707_at   | MED23     | mediator complex subunit 23                                                                | 0.3393 | 0.0261 |
| 242711_x_at | FANCM     | Fanconi anemia; complementation group M                                                    | 0.814  | 0.0023 |
| 242722_at   | LMO7      | LIM domain 7                                                                               | 0.6273 | 0.04   |
| 242723_at   |           | Transcribed locus                                                                          | 0.3406 | 0.0039 |
| 242724_x_at |           |                                                                                            | 0.24   | 0.0386 |
| 242725_at   |           | CDNA FLJ42225 fis; clone THYMU2040427                                                      | 0.9061 | 0.0094 |
| 242737_at   |           | Transcribed locus                                                                          | 0.7249 | 0.0016 |
| 242739_at   | C6orf201  | Chromosome 6 open reading frame 201                                                        | 1.3866 | 0.0089 |

|             |           |                                                                                             |        |        |
|-------------|-----------|---------------------------------------------------------------------------------------------|--------|--------|
| 242741_x_at |           | Transcribed locus                                                                           | 0.1466 | 0.0135 |
| 242753_x_at | C4orf16   | chromosome 4 open reading frame 16                                                          | 0.2106 | 0.0486 |
| 242755_at   |           |                                                                                             | 0.1396 | 0.0214 |
| 242756_at   |           |                                                                                             | 0.5278 | 0.0091 |
| 242759_at   |           | Transcribed locus                                                                           | 0.7552 | 0      |
| 242772_x_at |           | Transcribed locus                                                                           | 0.3888 | 0.0208 |
| 242785_at   | FLJ42562  | similar to echinoderm microtubule associated protein like 5                                 | 0.8867 | 0.0168 |
| 242786_at   |           | Full-length cDNA clone CS0DK010YC18 of HeLa cells Cot 25-normalized of Homo sapiens (human) | 0.3136 | 0.0421 |
| 242787_at   |           | Transcribed locus                                                                           | 0.5063 | 0.0109 |
| 242796_x_at |           | Transcribed locus                                                                           | 0.1203 | 0.0235 |
| 242797_x_at |           |                                                                                             | 0.5966 | 0.0321 |
| 242804_at   | POLN      | polymerase (DNA directed) nu                                                                | 0.2216 | 0.0484 |
| 242807_at   | FSD1L     | fibronectin type III and SPRY domain containing 1-like                                      | 0.874  | 0.0185 |
| 242829_x_at | FBXL3     | F-box and leucine-rich repeat protein 3                                                     | 0.3138 | 0.023  |
| 242851_at   | KIAA1919  | KIAA1919                                                                                    | 1.1397 | 0.0011 |
| 242854_x_at | DLEU2     | deleted in lymphocytic leukemia; 2                                                          | 0.2621 | 0.0072 |
| 242857_at   |           | CDNA FLJ37981 fis; clone CTONG2010566                                                       | 0.4555 | 0.0428 |
| 242859_at   |           | Transcribed locus                                                                           | 1.3637 | 0      |
| 242872_at   | CIT       | citron (rho-interacting; serine/threonine kinase 21)                                        | 0.2516 | 0.0261 |
| 242873_at   |           | Transcribed locus                                                                           | 1.815  | 0.0129 |
| 242877_at   |           | Transcribed locus                                                                           | 0.9255 | 0.008  |
| 242881_x_at |           | Clone HLS_IMAGE_626842 mRNA sequence                                                        | 3.475  | 0      |
| 242886_at   |           | Transcribed locus                                                                           | 0.4448 | 0.025  |
| 242889_x_at | LOC645431 | hypothetical protein LOC645431                                                              | 0.1953 | 0.039  |
| 242890_at   |           | CDNA FLJ34225 fis; clone FCBBF3023372                                                       | 1.6465 | 0.0003 |
| 242894_at   |           | Transcribed locus                                                                           | 0.482  | 0.0025 |
| 242900_at   | ALG10B    | asparagine-linked glycosylation 10 homolog B (yeast; alpha-1;2-glucosyltransferase)         | 0.9203 | 0.0015 |
| 242915_at   | ZNF682    | zinc finger protein 682                                                                     | 0.8867 | 0.0112 |
| 242918_at   | NASP      | Nuclear autoantigenic sperm protein (histone-binding)                                       | 0.6008 | 0.0129 |
| 242919_at   | ZNF253    | zinc finger protein 253                                                                     | 0.6062 | 0.041  |
| 242922_at   | NOMO1     | NODAL modulator 1, NODAL modulator 2, NODAL modulator 3                                     | 0.5908 | 0.0007 |
| 242923_at   | ZNF678    | Zinc finger protein 678                                                                     | 0.5746 | 0.0375 |
| 242926_at   |           | Transcribed locus                                                                           | 0.1958 | 0.0308 |
| 242928_at   |           | Transcribed locus                                                                           | 0.1873 | 0.0163 |
| 242940_x_at | DLX6      | distal-less homeobox 6                                                                      | 1.1863 | 0.0036 |
| 242953_at   |           | Transcribed locus                                                                           | 0.36   | 0.02   |



|             |           |                                                            |        |        |
|-------------|-----------|------------------------------------------------------------|--------|--------|
| 242966_x_at |           | CDNA FLJ31511 fis; clone NT2RI1000035                      | 0.2967 | 0.0062 |
| 242968_at   |           | Transcribed locus                                          | 1.1598 | 0.0005 |
| 242969_at   |           | Transcribed locus                                          | 0.9612 | 0.0005 |
| 242974_at   | CD47      | CD47 molecule                                              | 1.1605 | 0.002  |
| 242984_at   | MKLN1     | muskelin 1; intracellular mediator containing kelch motifs | 0.3903 | 0.0167 |
| 243003_at   |           | CDNA FLJ45369 fis; clone BRHIP3017325                      | 1.1552 | 0.0186 |
| 243005_at   |           | Transcribed locus                                          | 0.3646 | 0.0004 |
| 243009_at   | LOC441242 | CDNA clone IMAGE:5302136, Hypothetical LOC441242           | 1.4058 | 0      |
| 243017_at   |           | Transcribed locus                                          | 0.5218 | 0.0312 |
| 243026_x_at | BIRC4     | baculoviral IAP repeat-containing 4                        | 1.5012 | 0.0002 |
| 243030_at   |           | Transcribed locus                                          | 0.4638 | 0.021  |
| 243031_at   |           | Transcribed locus                                          | 1.6159 | 0.0002 |
| 243042_at   | FAM73A    | family with sequence similarity 73; member A               | 0.8592 | 0.0095 |
| 243051_at   | CNIH4     | Cornichon homolog 4 (Drosophila)                           | 0.1712 | 0.0129 |
| 243055_at   |           | Transcribed locus                                          | 0.3662 | 0.0007 |
| 243069_at   |           |                                                            | 0.236  | 0.0137 |
| 243071_at   |           | Transcribed locus                                          | 0.5968 | 0.0003 |
| 243090_at   |           | Transcribed locus                                          | 0.7503 | 0.008  |
| 243091_at   |           | Transcribed locus                                          | 0.5288 | 0.0296 |
| 243108_at   |           |                                                            | 0.2467 | 0.022  |
| 243113_at   |           | Transcribed locus                                          | 0.2539 | 0.0225 |
| 243115_at   |           | Transcribed locus                                          | 0.11   | 0.02   |
| 243121_x_at |           |                                                            | 0.1894 | 0.0288 |
| 243127_x_at | DNASE1    | deoxyribonuclease I                                        | 0.1726 | 0.0095 |
| 243147_x_at |           | Transcribed locus                                          | 0.2899 | 0.0123 |
| 243150_at   |           | Transcribed locus                                          | 0.6344 | 0.0024 |
| 243159_x_at |           | Transcribed locus                                          | 0.5329 | 0.0072 |
| 243162_at   |           | Transcribed locus                                          | 0.1918 | 0.0349 |
| 243166_at   | SLC30A5   | solute carrier family 30 (zinc transporter); member 5      | 0.4404 | 0.0462 |
| 243181_at   | ANKIB1    | ankyrin repeat and IBR domain containing 1                 | 0.4398 | 0.0002 |
| 243189_at   |           |                                                            | 0.6128 | 0.0007 |
| 243196_s_at | TRAFD1    | TRAF-type zinc finger domain containing 1                  | 0.4128 | 0.0005 |
| 243210_at   |           | CDNA FLJ46024 fis; clone SPLEN2022785                      | 0.46   | 0.0231 |
| 243216_x_at |           | Transcribed locus                                          | 0.3948 | 0.0034 |
| 243224_at   |           | CDNA FLJ34623 fis; clone KIDNE2015073                      | 0.3167 | 0.0041 |
| 243226_at   |           | Transcribed locus                                          | 0.1669 | 0.0021 |
| 243229_at   |           | Transcribed locus                                          | 0.2283 | 0.0313 |

|             |          |                                                                                                                        |        |        |
|-------------|----------|------------------------------------------------------------------------------------------------------------------------|--------|--------|
| 243264_s_at | C8orf44  | chromosome 8 open reading frame 44, serum/glucocorticoid regulated kinase family; member 3                             | 0.3489 | 0.0427 |
| 243271_at   |          | Transcribed locus                                                                                                      | 0.8529 | 0.0083 |
| 243275_at   |          |                                                                                                                        | 0.4778 | 0.0004 |
| 243277_x_at | EVI1     | Ecotropic viral integration site 1                                                                                     | 0.177  | 0.0009 |
| 243282_at   | CCDC93   | Coiled-coil domain containing 93                                                                                       | 0.4746 | 0.0087 |
| 243284_at   | FLJ11506 | hypothetical protein FLJ11506                                                                                          | 0.2577 | 0.0003 |
| 243286_at   |          | Transcribed locus                                                                                                      | 0.7086 | 0.033  |
| 243287_s_at | OSTM1    | osteopetrosis associated transmembrane protein 1                                                                       | 0.1789 | 0.0134 |
| 243294_at   | ZNF780B  | zinc finger protein 780B                                                                                               | 0.43   | 0.0036 |
| 243303_at   |          | CDNA FLJ40827 fis; clone TRACH2011500                                                                                  | 0.8285 | 0.0156 |
| 243305_at   |          | Transcribed locus                                                                                                      | 0.8123 | 0.0002 |
| 243310_at   |          | Transcribed locus                                                                                                      | 0.5755 | 0.002  |
| 243315_at   |          | Transcribed locus                                                                                                      | 0.4688 | 0.0267 |
| 243316_x_at | VPS26A   | Vacuolar protein sorting 26 homolog A (S. pombe)                                                                       | 0.2301 | 0.0416 |
| 243319_at   |          | Transcribed locus                                                                                                      | 0.1627 | 0.0243 |
| 243331_at   |          | Transcribed locus                                                                                                      | 0.1971 | 0.0329 |
| 243332_at   |          | Transcribed locus                                                                                                      | 0.8744 | 0.0026 |
| 243348_at   |          |                                                                                                                        | 0.1886 | 0.001  |
| 243352_at   | ALPK1    | alpha-kinase 1                                                                                                         | 0.5335 | 0.022  |
| 243353_at   |          |                                                                                                                        | 0.196  | 0.0152 |
| 243361_at   | SFRS12   | splicing factor; arginine/serine-rich 12                                                                               | 0.5013 | 0.0038 |
| 243367_at   |          | Transcribed locus                                                                                                      | 0.7343 | 0.0017 |
| 243368_at   |          | Transcribed locus                                                                                                      | 0.1877 | 0.009  |
| 243375_at   |          | Transcribed locus                                                                                                      | 0.1397 | 0.049  |
| 243381_at   |          |                                                                                                                        | 0.175  | 0.005  |
| 243388_at   |          | Transcribed locus; strongly similar to XP_519898.1 similar to DKFZP564O0463 protein; HSPC064 protein [Pan troglodytes] | 0.5644 | 0.0316 |
| 243407_at   | MFSD8    | Major facilitator superfamily domain containing 8                                                                      | 0.3944 | 0.0008 |
| 243413_at   | TTC30B   | tetratricopeptide repeat domain 30B                                                                                    | 0.5358 | 0.0001 |
| 243428_at   | KCNQ1OT1 | KCNQ1 overlapping transcript 1                                                                                         | 0.9698 | 0.0119 |
| 243435_at   | KCNQ1OT1 | KCNQ1 overlapping transcript 1                                                                                         | 0.9253 | 0.0092 |
| 243461_at   |          | Transcribed locus                                                                                                      | 0.5976 | 0.0075 |
| 243462_s_at |          | Transcribed locus                                                                                                      | 1.2101 | 0.0045 |
| 243465_at   |          | CDNA FLJ32348 fis; clone PROST2007200                                                                                  | 0.7871 | 0.0012 |
| 243476_at   |          | Transcribed locus; moderately similar to XP_001109186.1 hypothetical protein [Macaca mulatta]                          | 0.2199 | 0.0251 |
| 243490_at   |          |                                                                                                                        | 0.4508 | 0.0002 |

|             |           |                                                                                                    |        |        |
|-------------|-----------|----------------------------------------------------------------------------------------------------|--------|--------|
| 243496_at   | RAB18     | RAB18; member RAS oncogene family                                                                  | 0.846  | 0.0433 |
| 243498_at   |           | Transcribed locus                                                                                  | 0.3451 | 0.0049 |
| 243502_at   | GJA7      | gap junction protein; alpha 7; 45kDa                                                               | 0.7246 | 0.0017 |
| 243539_at   | KIAA1841  | KIAA1841                                                                                           | 0.7205 | 0.0074 |
| 243542_at   | PREPL     | prolyl endopeptidase-like                                                                          | 0.1401 | 0.0229 |
| 243546_at   |           | Transcribed locus                                                                                  | 0.3726 | 0.0186 |
| 243551_at   |           | Transcribed locus                                                                                  | 0.1205 | 0.0159 |
| 243557_at   |           |                                                                                                    | 0.3051 | 0.0122 |
| 243558_at   |           | Transcribed locus                                                                                  | 0.2802 | 0.013  |
| 243565_at   | FLJ39660  | hypothetical protein FLJ39660                                                                      | 0.2014 | 0.0325 |
| 243578_at   |           | Transcribed locus                                                                                  | 0.3256 | 0.0091 |
| 243590_at   |           | CDNA FLJ25435 fis; clone TST08040                                                                  | 0.1602 | 0.036  |
| 243592_at   | REV1      | REV1 homolog (S. cerevisiae)                                                                       | 0.3419 | 0.0271 |
| 243594_x_at | SPIRE2    | spire homolog 2 (Drosophila)                                                                       | 0.3999 | 0.0154 |
| 243606_at   |           | Transcribed locus                                                                                  | 0.5902 | 0.04   |
| 243608_at   | COG2      | component of oligomeric golgi complex 2                                                            | 0.2918 | 0.0256 |
| 243612_at   | NSD1      | Nuclear receptor binding SET domain protein 1                                                      | 0.3181 | 0.0312 |
| 243613_at   | MGC24039  | hypothetical protein MGC24039                                                                      | 0.3621 | 0      |
| 243617_at   | LOC152485 | Hypothetical protein LOC152485                                                                     | 0.3983 | 0.0282 |
| 243630_at   | NDUFB1    | NADH dehydrogenase (ubiquinone) 1 beta subcomplex; 1; 7kDa                                         | 0.2599 | 0.0411 |
| 243641_at   |           | Transcribed locus; moderately similar to XP_517655.1 similar to KIAA0825 protein [Pan troglodytes] | 0.2556 | 0.0105 |
| 243646_at   |           |                                                                                                    | 1.0171 | 0.0008 |
| 243655_x_at |           | Transcribed locus                                                                                  | 0.1013 | 0.0339 |
| 243660_at   | CHD9      | Chromodomain helicase DNA binding protein 9                                                        | 0.3367 | 0.0116 |
| 243661_at   | ZNF273    | zinc finger protein 273                                                                            | 0.8463 | 0.001  |
| 243664_at   | TXNL1     | Thioredoxin-like 1                                                                                 | 0.7614 | 0.0221 |
| 243667_at   |           | Full length insert cDNA YI30F01                                                                    | 0.2375 | 0.0374 |
| 243673_at   |           | Transcribed locus                                                                                  | 0.6123 | 0.0109 |
| 243683_at   | MORF4L2   | Mortality factor 4 like 2                                                                          | 1.0818 | 0.035  |
| 243689_s_at | C20orf80  | Chromosome 20 open reading frame 80                                                                | 0.1477 | 0.0284 |
| 243691_at   |           |                                                                                                    | 0.7676 | 0.025  |
| 243705_at   | DDHD1     | DDHD domain containing 1                                                                           | 0.2456 | 0.0002 |
| 243709_at   | FLJ90709  | hypothetical protein FLJ90709                                                                      | 1.4481 | 0.0002 |
| 243713_at   |           | Transcribed locus                                                                                  | 0.192  | 0.0246 |
| 243736_at   |           | Transcribed locus                                                                                  | 0.8216 | 0.0205 |
| 243750_x_at | C21orf70  | chromosome 21 open reading frame 70                                                                | 0.4636 | 0.024  |
| 243751_at   | CHD2      | Chromodomain helicase DNA binding protein 2                                                        | 0.4955 | 0.0087 |

|             |          |                                                                                              |        |        |
|-------------|----------|----------------------------------------------------------------------------------------------|--------|--------|
| 243756_at   |          |                                                                                              | 1.2183 | 0.0124 |
| 243761_at   | PFTK1    | PFTAIRE protein kinase 1                                                                     | 0.2984 | 0.0137 |
| 243763_x_at |          | Transcribed locus                                                                            | 0.2072 | 0.014  |
| 243765_at   |          | Transcribed locus                                                                            | 0.2773 | 0.0063 |
| 243772_at   | SDCCAG8  | serologically defined colon cancer antigen 8                                                 | 0.3396 | 0.0037 |
| 243785_at   |          | CDNA FLJ31475 fis; clone NT2NE2001598                                                        | 0.9972 | 0.0081 |
| 243786_at   | ZDHHC20  | zinc finger; DHHC-type containing 20                                                         | 0.4053 | 0.0144 |
| 243790_at   | ZNF585A  | zinc finger protein 585A                                                                     | 1.3787 | 0.0001 |
| 243792_x_at | PTPN13   | Protein tyrosine phosphatase; non-receptor type 13 (APO-1/CD95 (Fas)-associated phosphatase) | 0.5869 | 0.0258 |
| 243801_x_at |          | Transcribed locus                                                                            | 0.351  | 0.022  |
| 243808_at   |          | Transcribed locus                                                                            | 0.8147 | 0.0495 |
| 243834_at   | TNRC6A   | trinucleotide repeat containing 6A                                                           | 0.6906 | 0.0213 |
| 243835_at   | ZDHHC21  | Zinc finger; DHHC-type containing 21                                                         | 0.5512 | 0.0385 |
| 243840_at   |          | Arsenic transactivated protein 1                                                             | 0.2701 | 0.0073 |
| 243851_at   | RAB3GAP2 | RAB3 GTPase activating protein subunit 2 (non-catalytic)                                     | 0.6358 | 0.0426 |
| 243852_at   | LUC7L2   | LUC7-like 2 (S. cerevisiae)                                                                  | 0.617  | 0.008  |
| 243857_at   | MORF4L2  | Mortality factor 4 like 2                                                                    | 1.7628 | 0.0004 |
| 243858_at   |          |                                                                                              | 0.1793 | 0.0129 |
| 243861_at   |          | Transcribed locus                                                                            | 0.5953 | 0.007  |
| 243866_x_at |          |                                                                                              | 0.2148 | 0.0033 |
| 243871_at   |          | CDNA FLJ42179 fis; clone THYMU2030796                                                        | 0.1991 | 0.0049 |
| 243894_at   | SLC41A2  | solute carrier family 41; member 2                                                           | 0.8515 | 0.0448 |
| 243907_at   |          | Transcribed locus                                                                            | 1.5813 | 0.009  |
| 243908_at   |          |                                                                                              | 0.6552 | 0.0396 |
| 243910_x_at |          | CDNA FLJ30383 fis; clone BRACE2008102                                                        | 0.6808 | 0.0325 |
| 243945_at   | TRIM2    | tripartite motif-containing 2                                                                | 0.4489 | 0.0056 |
| 243963_at   | SDCCAG8  | Serologically defined colon cancer antigen 8                                                 | 0.6072 | 0.0214 |
| 243973_at   |          | Transcribed locus                                                                            | 0.38   | 0.0008 |
| 243982_at   | KLHL28   | Kelch-like 28 (Drosophila)                                                                   | 0.4861 | 0.0403 |
| 243985_at   | GTF2A2   | General transcription factor IIA; 2; 12kDa                                                   | 0.3451 | 0.0276 |
| 243995_at   | PTAR1    | protein prenyltransferase alpha subunit repeat containing 1                                  | 0.4103 | 0.0013 |
| 244000_at   |          | CDNA FLJ14364 fis; clone HEMBA1000918                                                        | 0.6376 | 0.0191 |
| 244010_at   |          | MRNA; cDNA DKFZp686J08131 (from clone DKFZp686J08131)                                        | 1.4217 | 0.0001 |
| 244011_at   | PPM1K    | protein phosphatase 1K (PP2C domain containing)                                              | 0.2568 | 0.0205 |
| 244014_x_at |          | Transcribed locus                                                                            | 0.4854 | 0      |
| 244031_at   |          |                                                                                              | 0.5049 | 0.0014 |

|             |           |                                                                                            |        |        |
|-------------|-----------|--------------------------------------------------------------------------------------------|--------|--------|
| 244033_at   | C14orf145 | chromosome 14 open reading frame 145                                                       | 0.7664 | 0.0054 |
| 244038_at   | WDR89     | WD repeat domain 89                                                                        | 0.6473 | 0.0095 |
| 244042_x_at | LOC651466 | Similar to retinoic acid receptor responder (tazarotene induced) 2                         | 1.3955 | 0.0002 |
| 244043_at   |           | MRNA; cDNA DKFZp313O196 (from clone DKFZp313O196)                                          | 1.0315 | 0.008  |
| 244046_at   | URG4      | up-regulated gene 4                                                                        | 0.9105 | 0.0018 |
| 244062_at   | DAAM1     | dishevelled associated activator of morphogenesis 1                                        | 0.6654 | 0.0018 |
| 244075_at   |           | Transcribed locus                                                                          | 1.7228 | 0.0126 |
| 244080_at   |           | Full-length cDNA clone CS0DI011YD16 of Placenta Cot 25-normalized of Homo sapiens (human)  | 0.5247 | 0.0459 |
| 244094_at   |           | Transcribed locus                                                                          | 0.1206 | 0.0076 |
| 244112_x_at |           |                                                                                            | 1.0704 | 0.0196 |
| 244115_at   | FAM126A   | family with sequence similarity 126; member A                                              | 0.2633 | 0.0132 |
| 244125_at   |           | Transcribed locus                                                                          | 0.321  | 0.026  |
| 244132_x_at | ZNF518    | Zinc finger protein 518                                                                    | 1.1768 | 0.0009 |
| 244133_at   |           | Transcribed locus                                                                          | 0.2046 | 0.016  |
| 244139_s_at |           |                                                                                            | 0.3303 | 0.036  |
| 244153_at   |           |                                                                                            | 0.473  | 0.0001 |
| 244170_at   |           | CDNA FLJ37366 fis; clone BRAMY2024416                                                      | 1.0183 | 0.0102 |
| 244171_at   | MKLN1     | muskelin 1; intracellular mediator containing kelch motifs                                 | 0.4446 | 0.0029 |
| 244185_at   |           | Transcribed locus                                                                          | 0.8011 | 0.0228 |
| 244187_at   | APOOL     | Apolipoprotein O-like                                                                      | 0.9535 | 0.0267 |
| 244189_at   | KIAA1648  | KIAA1648 protein                                                                           | 0.6317 | 0.0473 |
| 244195_at   |           | Transcribed locus                                                                          | 0.1802 | 0.0185 |
| 244197_x_at |           |                                                                                            | 0.805  | 0.0259 |
| 244220_at   |           |                                                                                            | 0.5441 | 0.0108 |
| 244228_at   |           |                                                                                            | 0.1029 | 0.0485 |
| 244236_at   |           |                                                                                            | 0.2007 | 0.0084 |
| 244241_x_at |           | Transcribed locus                                                                          | 0.4171 | 0.0236 |
| 244265_at   |           |                                                                                            | 0.2547 | 0.007  |
| 244267_at   |           | Transcribed locus                                                                          | 0.3221 | 0.0317 |
| 244271_at   |           | Transcribed locus                                                                          | 0.5748 | 0.0006 |
| 244275_at   |           | Transcribed locus                                                                          | 0.2622 | 0.0234 |
| 244286_at   |           | Transcribed locus                                                                          | 0.4379 | 0.008  |
| 244287_at   | SFRS12    | splicing factor; arginine/serine-rich 12                                                   | 1.7757 | 0.0005 |
| 244304_at   | LOC730069 | nuclear receptor binding factor 2 pseudogene, similar to nuclear receptor binding factor 2 | 0.4704 | 0.0217 |
| 244315_at   | PLSCR1    | phospholipid scramblase 1                                                                  | 0.107  | 0.0313 |
| 244324_at   | C18orf54  | chromosome 18 open reading frame 54                                                        | 0.5006 | 0.002  |

|             |           |                                                                                                                                            |        |        |
|-------------|-----------|--------------------------------------------------------------------------------------------------------------------------------------------|--------|--------|
| 244346_at   |           | Transcribed locus                                                                                                                          | 0.601  | 0.0247 |
| 244347_at   |           | Transcribed locus                                                                                                                          | 0.332  | 0.0431 |
| 244359_s_at |           | Clone HLS_IMAGE_1699118 mRNA sequence                                                                                                      | 1.6581 | 0.0399 |
| 244382_at   |           | Transcribed locus                                                                                                                          | 0.3151 | 0.0202 |
| 244401_at   | LCA5      | Leber congenital amaurosis 5                                                                                                               | 0.305  | 0.0021 |
| 244407_at   | CYP39A1   | cytochrome P450; family 39; subfamily A; polypeptide 1                                                                                     | 0.8713 | 0.0218 |
| 244427_at   | KIF23     | Kinesin family member 23                                                                                                                   | 0.9739 | 0.001  |
| 244450_at   |           |                                                                                                                                            | 0.7488 | 0.016  |
| 244462_at   | ZNF224    | Zinc finger protein 224                                                                                                                    | 0.9771 | 0.0008 |
| 244472_at   | LOC388630 | similar to C05G5.5                                                                                                                         | 0.4225 | 0.016  |
| 244473_at   |           | Transcribed locus                                                                                                                          | 0.2086 | 0.0136 |
| 244478_at   | LRRC37A3  | Leucine rich repeat containing 37; member A3                                                                                               | 0.1491 | 0.0477 |
| 244503_at   |           | Transcribed locus                                                                                                                          | 0.7052 | 0.0367 |
| 244505_at   |           | Transcribed locus; strongly similar to XP_001085606.1 similar to phosphoribosyl pyrophosphate amidotransferase proprotein [Macaca mulatta] | 0.1677 | 0.0243 |
| 244511_at   |           | Transcribed locus                                                                                                                          | 0.2674 | 0.0268 |
| 244513_at   | TMEM161B  | transmembrane protein 161B                                                                                                                 | 0.2379 | 0.0009 |
| 244515_at   | PSMD7     | Proteasome (prosome; macropain) 26S subunit; non-ATPase; 7                                                                                 | 0.5716 | 0.0005 |
| 244565_at   | HMX2      | H6 family homeobox 2                                                                                                                       | 1.0427 | 0.0192 |
| 244567_at   |           | Transcribed locus                                                                                                                          | 0.1616 | 0.0024 |
| 244587_at   |           |                                                                                                                                            | 0.5755 | 0.0006 |
| 244607_at   |           | Transcribed locus                                                                                                                          | 0.1608 | 0.0249 |
| 244622_at   | BRWD1     | Bromodomain and WD repeat domain containing 1                                                                                              | 0.179  | 0.0092 |
| 244633_at   |           | Transcribed locus                                                                                                                          | 1.0737 | 0.0397 |
| 244638_at   |           |                                                                                                                                            | 0.2325 | 0.0076 |
| 244640_at   | LOC342892 | Hypothetical protein LOC342892                                                                                                             | 1.0805 | 0.0001 |
| 244648_at   |           | Transcribed locus                                                                                                                          | 0.591  | 0.018  |
| 244659_at   | TRIP12    | Thyroid hormone receptor interactor 12                                                                                                     | 0.595  | 0.0413 |
| 244660_at   | ELAVL1    | ELAV (embryonic lethal; abnormal vision; Drosophila)-like 1 (Hu antigen R)                                                                 | 0.5108 | 0.0199 |
| 244664_at   |           | Transcribed locus                                                                                                                          | 0.5523 | 0.0004 |
| 244673_at   |           | Transcribed locus                                                                                                                          | 0.1263 | 0.0148 |
| 244679_at   |           | Transcribed locus                                                                                                                          | 0.1974 | 0.0093 |
| 244703_x_at | IPO9      | importin 9                                                                                                                                 | 0.4001 | 0.0169 |
| 244731_at   |           |                                                                                                                                            | 0.2576 | 0.0035 |
| 244749_at   |           | Homo sapiens; clone IMAGE:5218412; mRNA                                                                                                    | 0.2732 | 0.0111 |
| 244758_at   | ZNF452    | zinc finger protein 452                                                                                                                    | 1.386  | 0.0001 |

|             |           |                                                                                                                                                                                                           |        |        |
|-------------|-----------|-----------------------------------------------------------------------------------------------------------------------------------------------------------------------------------------------------------|--------|--------|
| 244766_at   | LOC440345 | PI-3-kinase-related kinase SMG-1, PI-3-kinase-related kinase SMG-1 - like locus, PI-3-kinase-related kinase SMG-1 pseudogene, hypothetical protein LOC440345, similar to PI-3-kinase-related kinase SMG-1 | 1.1566 | 0.0001 |
| 244767_at   | C10orf4   | chromosome 10 open reading frame 4                                                                                                                                                                        | 0.1997 | 0.0034 |
| 244777_at   | DCP2      | DCP2 decapping enzyme homolog ( <i>S. cerevisiae</i> )                                                                                                                                                    | 0.9405 | 0.0028 |
| 244783_at   | YAF2      | YY1 associated factor 2                                                                                                                                                                                   | 0.4014 | 0.0274 |
| 244786_at   | SNHG10    | small nucleolar RNA host gene (non-protein coding) 10                                                                                                                                                     | 0.5841 | 0.0016 |
| 244790_at   | MTCP1     | mature T-cell proliferation 1                                                                                                                                                                             | 0.6782 | 0.0025 |
| 244795_at   | C20orf44  | Chromosome 20 open reading frame 44                                                                                                                                                                       | 0.4253 | 0.0037 |
| 244801_at   | PSMB7     | Proteasome (prosome; macropain) subunit; beta type; 7                                                                                                                                                     | 0.7626 | 0.0276 |
| 244803_at   |           | Transcribed locus                                                                                                                                                                                         | 1.2553 | 0.0222 |
| 244811_at   |           | Full-length cDNA clone CS0DF025YM09 of Fetal brain of Homo sapiens (human)                                                                                                                                | 1.6994 | 0.0005 |
| 244813_at   |           | Transcribed locus                                                                                                                                                                                         | 0.6666 | 0.0001 |
| 244842_x_at |           | Transcribed locus                                                                                                                                                                                         | 0.4282 | 0.0127 |
| 244861_at   | ZNF527    | zinc finger protein 527                                                                                                                                                                                   | 0.345  | 0.0034 |
| 244878_at   |           | Transcribed locus                                                                                                                                                                                         | 0.898  | 0.0079 |
| 244881_at   | LMLN      | leishmanolysin-like (metallopeptidase M8 family)                                                                                                                                                          | 0.9357 | 0.0018 |
| 31637_s_at  | NR1D1     | nuclear receptor subfamily 1; group D; member 1, thyroid hormone receptor; alpha (erythroblastic leukemia viral (v-erb-a) oncogene homolog; avian)                                                        | 1.7787 | 0.0004 |
| 31807_at    | DDX49     | DEAD (Asp-Glu-Ala-Asp) box polypeptide 49                                                                                                                                                                 | 0.6478 | 0.0006 |
| 31845_at    | ELF4      | E74-like factor 4 (ets domain transcription factor)                                                                                                                                                       | 2.2744 | 0      |
| 32062_at    | LRRC14    | leucine rich repeat containing 14                                                                                                                                                                         | 0.4378 | 0.0014 |
| 32069_at    | N4BP1     | Nedd4 binding protein 1                                                                                                                                                                                   | 0.6254 | 0.0008 |
| 32137_at    | JAG2      | jagged 2                                                                                                                                                                                                  | 0.6661 | 0.0249 |
| 32402_s_at  | SYMPK     | symplekin                                                                                                                                                                                                 | 0.6279 | 0.0006 |
| 33132_at    | CPSF1     | cleavage and polyadenylation specific factor 1; 160kDa                                                                                                                                                    | 0.6617 | 0.0079 |
| 33148_at    | ZFR       | zinc finger RNA binding protein                                                                                                                                                                           | 0.5803 | 0.0053 |
| 33646_g_at  | GM2A      | GM2 ganglioside activator                                                                                                                                                                                 | 0.9839 | 0.0295 |
| 33768_at    | DMWD      | dystrophia myotonica; WD repeat containing                                                                                                                                                                | 0.5592 | 0.0043 |
| 33814_at    | PAK4      | p21(CDKN1A)-activated kinase 4                                                                                                                                                                            | 1.0276 | 0      |
| 34031_i_at  | KRIT1     | KRIT1; ankyrin repeat containing                                                                                                                                                                          | 0.7542 | 0.0006 |
| 34187_at    | RBMS2     | RNA binding motif; single stranded interacting protein 2                                                                                                                                                  | 0.2632 | 0.0099 |
| 34221_at    | KIAA0194  | KIAA0194 protein                                                                                                                                                                                          | 0.8603 | 0.0002 |
| 34225_at    | WHSC2     | Wolf-Hirschhorn syndrome candidate 2                                                                                                                                                                      | 0.6729 | 0.0016 |

|            |             |                                                                                                                     |        |        |
|------------|-------------|---------------------------------------------------------------------------------------------------------------------|--------|--------|
| 34449_at   | CASP2       | caspase 2; apoptosis-related cysteine peptidase (neural precursor cell expressed; developmentally down-regulated 2) | 0.2612 | 0.0026 |
| 34697_at   | LRP6        | low density lipoprotein receptor-related protein 6                                                                  | 0.7894 | 0.0011 |
| 34726_at   | CACNB3      | calcium channel; voltage-dependent; beta 3 subunit                                                                  | 0.6333 | 0.0414 |
| 35150_at   | CD40        | CD40 molecule; TNF receptor superfamily member 5                                                                    | 0.5851 | 0.0479 |
| 35160_at   | LDB1        | LIM domain binding 1                                                                                                | 0.7782 | 0.036  |
| 35254_at   | TRAFD1      | TRAF-type zinc finger domain containing 1                                                                           | 0.8908 | 0      |
| 35436_at   | GOLGA2      | golgi autoantigen; golgin subfamily a; 2                                                                            | 0.801  | 0.0028 |
| 35666_at   | SEMA3F      | sema domain; immunoglobulin domain (Ig); short basic domain; secreted; (semaphorin) 3F                              | 1.3744 | 0.0002 |
| 35671_at   | GTF3C1      | general transcription factor IIIC; polypeptide 1; alpha 220kDa                                                      | 0.574  | 0.0007 |
| 36030_at   | HOM-TES-103 | hypothetical protein LOC25900                                                                                       | 0.9882 | 0.0002 |
| 36888_at   | KIAA0841    | KIAA0841                                                                                                            | 0.7585 | 0.0002 |
| 36994_at   | ATP6V0C     | ATPase; H+ transporting; lysosomal 16kDa; V0 subunit c                                                              | 0.3557 | 0.0232 |
| 37254_at   | ZNF133      | zinc finger protein 133                                                                                             | 1.0278 | 0      |
| 37278_at   | TAZ         | tafazzin (cardiomyopathy; dilated 3A (X-linked); endocardial fibroelastosis 2; Barth syndrome)                      | 0.3369 | 0.0337 |
| 37462_i_at | SF3A2       | splicing factor 3a; subunit 2; 66kDa                                                                                | 0.6814 | 0.0056 |
| 37547_at   | BBS9        | Bardet-Biedl syndrome 9                                                                                             | 0.5996 | 0.0306 |
| 37793_r_at | RAD51L3     | RAD51-like 3 (S. cerevisiae)                                                                                        | 0.3322 | 0.0003 |
| 37860_at   | ZNF337      | zinc finger protein 337                                                                                             | 0.9239 | 0.0001 |
| 37872_at   | JRK         | jerky homolog (mouse)                                                                                               | 0.219  | 0.0228 |
| 37892_at   | COL11A1     | collagen; type XI; alpha 1                                                                                          | 3.5002 | 0.0048 |
| 38158_at   | ESPL1       | extra spindle pole bodies homolog 1 (S. cerevisiae)                                                                 | 1.8332 | 0.0004 |
| 38269_at   | PRKD2       | protein kinase D2                                                                                                   | 1.2996 | 0      |
| 38521_at   | CD22        | CD22 molecule, myelin associated glycoprotein                                                                       | 0.752  | 0.0494 |
| 38766_at   | SRCAP       | Snf2-related CBP activator protein                                                                                  | 0.2977 | 0.0111 |
| 39313_at   | WNK1        | WNK lysine deficient protein kinase 1                                                                               | 0.5186 | 0.0018 |
| 40149_at   | SH2B1       | SH2B adaptor protein 1                                                                                              | 0.4233 | 0.0032 |
| 40255_at   | DDX28       | DEAD (Asp-Glu-Ala-Asp) box polypeptide 28                                                                           | 0.5786 | 0.0447 |
| 40465_at   | DDX23       | DEAD (Asp-Glu-Ala-Asp) box polypeptide 23                                                                           | 0.7038 | 0.0008 |
| 40472_at   | AGPAT7      | 1-acylglycerol-3-phosphate O-acyltransferase 7 (lysophosphatidic acid acyltransferase; eta)                         | 1.0115 | 0.0007 |
| 40569_at   | MZF1        | myeloid zinc finger 1                                                                                               | 0.8535 | 0.0068 |
| 41113_at   | ZNF500      | zinc finger protein 500                                                                                             | 0.5968 | 0.0001 |
| 41397_at   | LOC55565    | hypothetical protein LOC55565                                                                                       | 0.2316 | 0.0141 |
| 41512_at   |             | Transcribed locus                                                                                                   | 0.4102 | 0.0445 |



|            |           |                                                                 |        |        |
|------------|-----------|-----------------------------------------------------------------|--------|--------|
| 43544_at   | MED16     | mediator complex subunit 16                                     | 0.8256 | 0.0019 |
| 43977_at   | TMEM161A  | transmembrane protein 161A                                      | 0.7811 | 0.0002 |
| 44111_at   | VPS33B    | vacuolar protein sorting 33 homolog B (yeast)                   | 0.4232 | 0.0263 |
| 44120_at   | ADCK2     | aarF domain containing kinase 2                                 | 0.9554 | 0.0006 |
| 44617_at   | OGFOD2    | 2-oxoglutarate and iron-dependent oxygenase domain containing 2 | 0.6478 | 0.0005 |
| 44669_at   | LOC644096 | hypothetical protein LOC644096                                  | 0.6898 | 0.0023 |
| 44783_s_at | HEY1      | hairy/enhancer-of-split related with YRPW motif 1               | 1.6563 | 0.0039 |
| 44822_s_at | MIER2     | mesoderm induction early response 1; family member 2            | 0.3782 | 0.0259 |
| 45633_at   | GINS3     | GINS complex subunit 3 (Psf3 homolog)                           | 1.3263 | 0.0002 |
| 45653_at   | KCTD13    | potassium channel tetramerisation domain containing 13          | 0.8118 | 0.0036 |
| 45687_at   | PRR14     | proline rich 14                                                 | 0.5417 | 0.0104 |
| 46947_at   | GNL3L     | guanine nucleotide binding protein-like 3 (nucleolar)-like      | 0.3767 | 0.0201 |
| 47560_at   | LPHN1     | latrophilin 1                                                   | 0.8943 | 0.0203 |
| 48808_at   | DHFR      | dihydrofolate reductase                                         | 2.3657 | 0      |
| 48825_at   | ING4      | inhibitor of growth family; member 4                            | 0.5368 | 0.0105 |
| 49485_at   | PRDM4     | PR domain containing 4                                          | 1.1657 | 0.0002 |
| 50314_i_at | C20orf27  | chromosome 20 open reading frame 27                             | 0.6488 | 0.024  |
| 50376_at   | ZNF444    | zinc finger protein 444                                         | 0.4258 | 0.0151 |
| 51176_at   | MED27     | mediator complex subunit 27                                     | 0.8115 | 0.0153 |
| 51200_at   | C19orf60  | chromosome 19 open reading frame 60                             | 0.4392 | 0.0286 |
| 51228_at   | RBM12B    | RNA binding motif protein 12B                                   | 1.495  | 0      |
| 52005_at   | WIZ       | widely interspaced zinc finger motifs                           | 0.8784 | 0      |
| 52164_at   | C11orf24  | chromosome 11 open reading frame 24                             | 0.629  | 0.0455 |
| 53202_at   | C7orf25   | chromosome 7 open reading frame 25                              | 0.3381 | 0.0372 |
| 55065_at   | MARK4     | MAP/microtubule affinity-regulating kinase 4                    | 0.904  | 0      |
| 55093_at   | CSGlcA-T  | chondroitin sulfate glucuronyltransferase                       | 0.78   | 0.0011 |
| 55705_at   | C19orf22  | chromosome 19 open reading frame 22                             | 0.2916 | 0.0366 |
| 55872_at   | ZNF512B   | zinc finger protein 512B                                        | 0.9588 | 0.001  |
| 56821_at   | FLJ10815  | amino acid transporter                                          | 1.0855 | 0.0008 |
| 57516_at   | ZNF764    | zinc finger protein 764                                         | 0.7536 | 0.0033 |
| 57532_at   | DVL2      | dishevelled; dsh homolog 2 (Drosophila)                         | 0.596  | 0.0261 |
| 58367_s_at | ZNF419    | zinc finger protein 419                                         | 0.4592 | 0.0105 |
| 58994_at   | CC2D1A    | coiled-coil and C2 domain containing 1A                         | 0.6267 | 0.0006 |
| 60528_at   | PLA2G4B   | phospholipase A2; group IVB (cytosolic)                         | 0.3032 | 0.033  |
| 60794_f_at | LOC730051 | similar to Zinc finger protein 418, zinc finger protein 814     | 0.5442 | 0.0086 |

|                                   |           |                                                                         |         |        |
|-----------------------------------|-----------|-------------------------------------------------------------------------|---------|--------|
| 60815_at                          | POLR2J4   | polymerase (RNA) II (DNA directed) polypeptide J;<br>13.3kDa pseudogene | 0.995   | 0.0005 |
| 61874_at                          | C9orf7    | chromosome 9 open reading frame 7                                       | 0.4859  | 0.013  |
| 63825_at                          | ABHD2     | abhydrolase domain containing 2                                         | 0.7776  | 0.0269 |
| 64371_at                          | SFRS14    | splicing factor; arginine/serine-rich 14                                | 0.9234  | 0      |
| 64432_at                          | C12orf47  | chromosome 12 open reading frame 47                                     | 0.6311  | 0.0087 |
| 64883_at                          | MOSPD2    | motile sperm domain containing 2                                        | 0.7272  | 0.0001 |
| 64900_at                          | FLJ22167  | hypothetical protein FLJ22167                                           | 1.1386  | 0.0022 |
| 65086_at                          | YIPF2     | Yip1 domain family; member 2                                            | 0.3721  | 0.0375 |
| 65438_at                          | KIAA1609  | KIAA1609                                                                | 0.8447  | 0.0001 |
| 65770_at                          | RHOT2     | ras homolog gene family; member T2                                      | 0.3196  | 0.0416 |
| 65884_at                          | MAN1B1    | mannosidase; alpha; class 1B; member 1                                  | 0.7896  | 0.0265 |
| 74694_s_at                        | RABEP2    | rabaptin; RAB GTPase binding effector protein 2                         | 0.7748  | 0.0162 |
| 76897_s_at                        | FKBP15    | FK506 binding protein 15; 133kDa                                        | 1.0529  | 0.0159 |
| 78495_at                          | ZNF783    | zinc finger protein 783                                                 | 0.3375  | 0.0348 |
| 79005_at                          | SLC35E1   | solute carrier family 35; member E1                                     | 0.8264  | 0.0001 |
| 81737_at                          |           | Homo sapiens; clone IMAGE:4271781                                       | 0.297   | 0.0406 |
| 81811_at                          |           | CDNA FLJ37304 fis; clone BRAMY2016070                                   | 0.6823  | 0.0112 |
| 90610_at                          | LRCH4     | leucine-rich repeats and calponin homology (CH)<br>domain containing 4  | 0.4864  | 0.0435 |
| 91816_f_at                        | MEX3D     | mex-3 homolog D (C. elegans)                                            | 1.1198  | 0.0118 |
| 91952_at                          | LOC90379  | hypothetical protein BC002926                                           | 1.0566  | 0      |
| AFFX-<br>HSAC07/X00351_3_a<br>t   | ACTB      | actin; beta                                                             | 0.1015  | 0.0374 |
| AFFX-<br>HSAC07/X00351_5_a<br>t   | ACTB      | actin; beta                                                             | 0.6314  | 0.0081 |
| AFFX-<br>HSAC07/X00351_M_<br>at   | ACTB      | actin; beta                                                             | 0.3463  | 0.004  |
| AFFX-<br>HUMGAPDH/M33197<br>_3_at | GAPDH     | glyceraldehyde-3-phosphate dehydrogenase                                | 0.442   | 0      |
| AFFX-<br>HUMGAPDH/M33197<br>_5_at | GAPDH     | glyceraldehyde-3-phosphate dehydrogenase                                | 0.7362  | 0      |
| AFFX-<br>HUMGAPDH/M33197<br>_M_at | GAPDH     | glyceraldehyde-3-phosphate dehydrogenase                                | 0.7163  | 0      |
| AFFX-hum_alu_at                   |           |                                                                         | 0.1091  | 0.006  |
| 121_at                            | PAX8      | paired box 8                                                            | -0.7092 | 0.0002 |
| 1552261_at                        | WFDC2     | WAP four-disulfide core domain 2                                        | -0.1301 | 0.015  |
| 1552278_a_at                      | SLC46A1   | solute carrier family 46; member 1                                      | -1.3729 | 0.0001 |
| 1552279_a_at                      | SLC46A1   | solute carrier family 46; member 1                                      | -0.8726 | 0.0001 |
| 1552281_at                        | SLC39A5   | solute carrier family 39 (metal ion transporter);<br>member 5           | -0.2041 | 0.0325 |
| 1552303_a_at                      | LOC728772 | similar to transmembrane protein 106A,<br>transmembrane protein 106A    | -0.3029 | 0.0258 |

|              |          |                                                                    |         |        |
|--------------|----------|--------------------------------------------------------------------|---------|--------|
| 1552307_a_at | C18orf17 | chromosome 18 open reading frame 17                                | -2.3787 | 0.0003 |
| 1552309_a_at | NEXN     | nexilin (F actin binding protein)                                  | -2.5976 | 0      |
| 1552316_a_at | GIMAP1   | GTPase; IMAP family member 1                                       | -1.0167 | 0.0119 |
| 1552318_at   | GIMAP1   | GTPase; IMAP family member 1                                       | -0.4435 | 0.0212 |
| 1552320_a_at | CCDC65   | coiled-coil domain containing 65                                   | -0.2206 | 0.0119 |
| 1552329_at   | RBBP6    | retinoblastoma binding protein 6                                   | -1.1524 | 0.0091 |
| 1552349_a_at | PRSS33   | protease; serine; 33                                               | -0.1342 | 0.049  |
| 1552354_at   | C19orf26 | chromosome 19 open reading frame 26                                | -0.1703 | 0.0232 |
| 1552355_s_at | C19orf26 | chromosome 19 open reading frame 26                                | -0.1558 | 0.0317 |
| 1552364_s_at | MSI2     | musashi homolog 2 (Drosophila)                                     | -1.7858 | 0      |
| 1552377_s_at | FAM18B2  | family with sequence similarity 18; member B2                      | -0.2435 | 0.0151 |
| 1552395_at   | TSSK3    | testis-specific serine kinase 3                                    | -0.2081 | 0.0003 |
| 1552402_at   | CALML6   | calmodulin-like 6                                                  | -0.1683 | 0.0006 |
| 1552409_a_at | ODF4     | outer dense fiber of sperm tails 4                                 | -0.1156 | 0.0285 |
| 1552418_at   | TTL10    | tubulin tyrosine ligase-like family; member 10                     | -0.1344 | 0.006  |
| 1552423_at   | ETV3     | ets variant gene 3                                                 | -0.2456 | 0.0015 |
| 1552438_a_at | ANKAR    | ankyrin and armadillo repeat containing                            | -0.1179 | 0.0482 |
| 1552440_at   | ADMR     | adrenomedullin receptor                                            | -0.9897 | 0      |
| 1552459_a_at | MBD3L1   | methyl-CpG binding domain protein 3-like 1                         | -0.1657 | 0.0049 |
| 1552467_at   | DSCR10   | Down syndrome critical region gene 10                              | -0.2076 | 0.0058 |
| 1552482_at   | RAPH1    | Ras association (RalGDS/AF-6) and pleckstrin homology domains 1    | -0.2143 | 0.0099 |
| 1552489_s_at | MPP4     | membrane protein; palmitoylated 4 (MAGUK p55 subfamily member 4)   | -0.1934 | 0.005  |
| 1552491_at   | IDI2     | isopentenyl-diphosphate delta isomerase 2                          | -0.3059 | 0      |
| 1552493_s_at | CYP11B1  | cytochrome P450; family 11; subfamily B; polypeptide 1             | -3.9161 | 0.0021 |
| 1552498_at   | ZSCAN20  | zinc finger and SCAN domain containing 20                          | -0.1907 | 0.0225 |
| 1552501_a_at | GPBAR1   | G protein-coupled bile acid receptor 1                             | -0.3946 | 0      |
| 1552509_a_at | CD300LG  | CD300 molecule-like family member g                                | -0.6338 | 0.005  |
| 1552519_at   | ACVR1C   | activin A receptor; type IC                                        | -0.5458 | 0.0123 |
| 1552541_at   | TAGAP    | T-cell activation GTPase activating protein                        | -0.1693 | 0.0278 |
| 1552543_a_at | STON2    | stonin 2                                                           | -0.1151 | 0.025  |
| 1552548_at   | BSND     | Bartter syndrome; infantile; with sensorineural deafness (Barttin) | -0.1727 | 0.0056 |
| 1552549_a_at | BSND     | Bartter syndrome; infantile; with sensorineural deafness (Barttin) | -0.1413 | 0.0453 |
| 1552553_a_at | NLRC4    | NLR family; CARD domain containing 4                               | -0.488  | 0.0011 |
| 1552568_at   | RTP3     | receptor (chemosensory) transporter protein 3                      | -0.1645 | 0.0124 |
| 1552585_s_at | GTF2A1L  | general transcription factor IIA; 1-like                           | -0.1092 | 0.0313 |

|              |          |                                                                          |         |        |
|--------------|----------|--------------------------------------------------------------------------|---------|--------|
| 1552586_at   | TRPV3    | transient receptor potential cation channel; subfamily V; member 3       | -0.1404 | 0.0315 |
| 1552596_at   | GAS2L2   | growth arrest-specific 2 like 2                                          | -0.1424 | 0.0217 |
| 1552598_at   | KCNG4    | potassium voltage-gated channel; subfamily G; member 4                   | -0.1935 | 0.009  |
| 1552602_at   | CACNG5   | calcium channel; voltage-dependent; gamma subunit 5                      | -0.2009 | 0.0094 |
| 1552605_s_at | C21orf74 | chromosome 21 open reading frame 74                                      | -0.1363 | 0.0061 |
| 1552626_a_at | TMEM163  | transmembrane protein 163                                                | -0.8446 | 0.0283 |
| 1552632_a_at | ARSG     | arylsulfatase G                                                          | -0.5666 | 0.0035 |
| 1552637_at   | PTPN11   | protein tyrosine phosphatase; non-receptor type 11 (Noonan syndrome 1)   | -0.1274 | 0.0198 |
| 1552658_a_at | NAV3     | neuron navigator 3                                                       | -1.1411 | 0.0003 |
| 1552676_at   | UCN3     | urocortin 3 (stresscopin)                                                | -0.2546 | 0.0004 |
| 1552690_a_at | CACNA2D4 | calcium channel; voltage-dependent; alpha 2/delta subunit 4              | -0.1149 | 0.0124 |
| 1552701_a_at | COP1     | caspase-1 dominant-negative inhibitor pseudo-ICE                         | -1.2042 | 0.0441 |
| 1552711_a_at | CYB5D1   | cytochrome b5 domain containing 1                                        | -0.5403 | 0.0338 |
| 1552715_a_at | RXFP1    | relaxin/insulin-like family peptide receptor 1                           | -1.3949 | 0      |
| 1552725_s_at | ADAMTS17 | ADAM metalloproteinase with thrombospondin type 1 motif; 17              | -0.1818 | 0.0065 |
| 1552731_at   | ABRA     | actin-binding Rho activating protein                                     | -0.1448 | 0.0042 |
| 1552739_s_at | ST7L     | suppression of tumorigenicity 7 like                                     | -0.6041 | 0.0336 |
| 1552747_a_at | C3orf48  | chromosome 3 open reading frame 48                                       | -0.1323 | 0.0154 |
| 1552750_at   | CIB3     | calcium and integrin binding family member 3                             | -0.1767 | 0.0037 |
| 1552755_at   | C9orf66  | chromosome 9 open reading frame 66                                       | -0.4247 | 0.0032 |
| 1552757_s_at |          |                                                                          | -0.2269 | 0.0001 |
| 1552761_at   | SLC16A11 | solute carrier family 16; member 11 (monocarboxylic acid transporter 11) | -0.2171 | 0.0052 |
| 1552767_a_at | HS6ST2   | heparan sulfate 6-O-sulfotransferase 2                                   | -0.7095 | 0.0003 |
| 1552789_at   | TLOC1    | translocation protein 1                                                  | -1.1221 | 0      |
| 1552790_a_at | TLOC1    | translocation protein 1                                                  | -1.9541 | 0      |
| 1552798_a_at | TLR4     | toll-like receptor 4                                                     | -0.4149 | 0.0002 |
| 1552799_at   | TSNARE1  | t-SNARE domain containing 1                                              | -0.1347 | 0.042  |
| 1552800_at   | ABHD11   | abhydrolase domain containing 11                                         | -0.2626 | 0.0053 |
| 1552804_a_at | TIRAP    | toll-interleukin 1 receptor (TIR) domain containing adaptor protein      | -0.1514 | 0.0208 |
| 1552807_a_at | SIGLEC10 | sialic acid binding Ig-like lectin 10                                    | -0.6772 | 0.0073 |
| 1552818_a_at | BRS3     | bombesin-like receptor 3                                                 | -0.1286 | 0.0356 |
| 1552819_at   | C21orf86 | chromosome 21 open reading frame 86                                      | -0.1179 | 0.0462 |
| 1552827_s_at | SLC26A7  | solute carrier family 26; member 7                                       | -0.1279 | 0.0104 |
| 1552829_at   |          |                                                                          | -0.2603 | 0.0192 |
| 1552856_at   | TMEM148  | transmembrane protein 148                                                | -0.1393 | 0.0013 |

|              |             |                                                               |         |        |
|--------------|-------------|---------------------------------------------------------------|---------|--------|
| 1552857_a_at | HTR6        | 5-hydroxytryptamine (serotonin) receptor 6                    | -0.2154 | 0.0003 |
| 1552860_at   | TCEB3C      | transcription elongation factor B polypeptide 3C (elongin A3) | -0.2006 | 0.0032 |
| 1552863_a_at | CACNG6      | calcium channel; voltage-dependent; gamma subunit 6           | -0.2427 | 0.0195 |
| 1552865_a_at | IFLTD1      | intermediate filament tail domain containing 1                | -0.1514 | 0.0075 |
| 1552887_at   | C10orf27    | chromosome 10 open reading frame 27                           | -0.1891 | 0.0356 |
| 1552890_a_at | CABP4       | calcium binding protein 4                                     | -0.2035 | 0.0041 |
| 1552892_at   | TNFRSF13C   | tumor necrosis factor receptor superfamily; member 13C        | -0.151  | 0.0026 |
| 1552893_at   | CAMK2N2     | calcium/calmodulin-dependent protein kinase II inhibitor 2    | -0.3702 | 0      |
| 1552897_a_at | KCNG3       | potassium voltage-gated channel; subfamily G; member 3        | -1.371  | 0.0008 |
| 1552898_a_at | KCNG3       | potassium voltage-gated channel; subfamily G; member 3        | -0.1229 | 0.045  |
| 1552899_at   | RP4-662A9.2 | hypothetical protein MGC34034                                 | -0.3644 | 0.0023 |
| 1552903_at   | B4GALNT2    | beta-1,4-N-acetyl-galactosaminyl transferase 2                | -0.18   | 0.0211 |
| 1552917_at   | IL29        | interleukin 29 (interferon; lambda 1)                         | -0.1454 | 0.025  |
| 1552930_at   | MMEL1       | membrane metallo-endopeptidase-like 1                         | -0.2763 | 0.0326 |
| 1552971_at   | SGCZ        | sarcoglycan zeta                                              | -0.1561 | 0.0049 |
| 1552988_at   | C11orf65    | chromosome 11 open reading frame 65                           | -0.2009 | 0.0037 |
| 1552998_at   | DEFB125     | defensin; beta 125                                            | -0.1345 | 0.0291 |
| 1553002_at   | DEFB105A    | defensin; beta 105A, defensin; beta 105B                      | -0.1458 | 0.0032 |
| 1553009_s_at | REXO1L1     | REX1; RNA exonuclease 1 homolog (S. cerevisiae)-like 1        | -0.103  | 0.0417 |
| 1553019_at   | TMC2        | transmembrane channel-like 2                                  | -0.1278 | 0.0249 |
| 1553027_a_at | KLHL4       | kelch-like 4 (Drosophila)                                     | -2.2886 | 0.0008 |
| 1553030_a_at | SUOX        | sulfite oxidase                                               | -0.6087 | 0.0001 |
| 1553033_at   | SYTL5       | synaptotagmin-like 5                                          | -0.2721 | 0.0042 |
| 1553041_at   | HTR3C       | 5-hydroxytryptamine (serotonin) receptor 3; family member C   | -0.1565 | 0.0237 |
| 1553047_at   | PIP4K2B     | phosphatidylinositol-5-phosphate 4-kinase; type II; beta      | -0.3005 | 0.0018 |
| 1553058_at   | GIPC3       | GIPC PDZ domain containing family; member 3                   | -0.1364 | 0.0238 |
| 1553059_at   | PGLYRP3     | peptidoglycan recognition protein 3                           | -0.1253 | 0.0023 |
| 1553063_at   | GPR78       | G protein-coupled receptor 78                                 | -0.1751 | 0.0005 |
| 1553064_at   | H1FOO       | H1 histone family; member O; oocyte-specific                  | -0.1522 | 0.0461 |
| 1553071_a_at | MYOZ3       | myozenin 3                                                    | -0.158  | 0.0184 |
| 1553074_at   | ASB11       | ankyrin repeat and SOCS box-containing 11                     | -0.157  | 0.0046 |
| 1553077_at   | SDR-O       | orphan short-chain dehydrogenase / reductase                  | -0.1779 | 0.0007 |
| 1553078_at   | OR5P3       | olfactory receptor; family 5; subfamily P; member 3           | -0.1134 | 0.0127 |
| 1553082_at   | CRYGN       | crystallin; gamma N                                           | -0.2397 | 0.0015 |

|              |           |                                                                            |         |        |
|--------------|-----------|----------------------------------------------------------------------------|---------|--------|
| 1553086_at   | C11orf40  | chromosome 11 open reading frame 40                                        | -0.1259 | 0.0016 |
| 1553088_a_at | BCL2L11   | BCL2-like 11 (apoptosis facilitator)                                       | -0.1869 | 0.0447 |
| 1553089_a_at | WFDC2     | WAP four-disulfide core domain 2                                           | -0.1143 | 0.0148 |
| 1553096_s_at | BCL2L11   | BCL2-like 11 (apoptosis facilitator)                                       | -0.2471 | 0.0158 |
| 1553103_at   | NFX1      | nuclear transcription factor; X-box binding 1                              | -0.7263 | 0.0011 |
| 1553111_a_at | KBTBD6    | kelch repeat and BTB (POZ) domain containing 6                             | -0.7989 | 0.0031 |
| 1553114_a_at | PTK6      | PTK6 protein tyrosine kinase 6                                             | -0.1449 | 0.0332 |
| 1553118_at   | THEM4     | thioesterase superfamily member 4                                          | -0.8313 | 0.002  |
| 1553129_at   | SVEP1     | sushi; von Willebrand factor type A; EGF and pentraxin domain containing 1 | -0.2318 | 0.0033 |
| 1553133_at   | C9orf72   | chromosome 9 open reading frame 72                                         | -2.4106 | 0      |
| 1553134_s_at | C9orf72   | chromosome 9 open reading frame 72                                         | -0.2828 | 0.0204 |
| 1553156_at   | LHX4      | LIM homeobox 4                                                             | -0.2167 | 0      |
| 1553168_at   | GRIK5     | glutamate receptor; ionotropic; kainate 5                                  | -0.1209 | 0.0347 |
| 1553174_at   | JPH2      | junctophilin 2                                                             | -0.1951 | 0.0004 |
| 1553176_at   | SH2D1B    | SH2 domain containing 1B                                                   | -0.144  | 0.0088 |
| 1553194_at   | NEGR1     | neuronal growth regulator 1                                                | -0.2649 | 0      |
| 1553196_a_at | FCRL3     | Fc receptor-like 3                                                         | -0.144  | 0.0306 |
| 1553202_at   | STOX1     | storkhead box 1                                                            | -0.2606 | 0.0009 |
| 1553204_at   | C20orf200 | chromosome 20 open reading frame 200                                       | -0.1361 | 0.0155 |
| 1553205_at   | C20orf200 | Chromosome 20 open reading frame 200                                       | -0.3077 | 0.0001 |
| 1553207_at   | ARL10     | ADP-ribosylation factor-like 10                                            | -0.1217 | 0.0351 |
| 1553215_s_at | CCDC7     | coiled-coil domain containing 7                                            | -0.3134 | 0.0008 |
| 1553220_at   | ALS2CR13  | amyotrophic lateral sclerosis 2 (juvenile) chromosome region; candidate 13 | -0.5455 | 0.0004 |
| 1553232_at   | FAM82A    | family with sequence similarity 82; member A                               | -0.181  | 0.0006 |
| 1553239_at   | FAM124A   | family with sequence similarity 124A                                       | -0.1254 | 0.0393 |
| 1553255_at   | FLJ32214  | FLJ32214 protein                                                           | -0.1526 | 0.0236 |
| 1553257_at   | GAL3ST3   | galactose-3-O-sulfotransferase 3                                           | -0.1624 | 0.0049 |
| 1553262_a_at | UTS2R     | urotensin 2 receptor                                                       | -0.2454 | 0      |
| 1553275_s_at |           |                                                                            | -0.5562 | 0.0109 |
| 1553279_at   | BTNL9     | butyrophilin-like 9                                                        | -0.2119 | 0.0194 |
| 1553310_at   |           |                                                                            | -0.2045 | 0.0004 |
| 1553314_a_at | KIF19     | kinesin family member 19                                                   | -0.1456 | 0.0024 |
| 1553316_at   | GPR82     | G protein-coupled receptor 82                                              | -0.2249 | 0.0025 |
| 1553317_s_at | GPR82     | G protein-coupled receptor 82                                              | -0.1789 | 0.0082 |
| 1553327_a_at | C10orf30  | chromosome 10 open reading frame 30                                        | -0.1183 | 0.014  |
| 1553328_a_at | SLC18A2   | solute carrier family 18 (vesicular monoamine); member 2                   | -0.1931 | 0.0002 |

|              |           |                                                               |         |        |
|--------------|-----------|---------------------------------------------------------------|---------|--------|
| 1553330_at   | C7orf45   | chromosome 7 open reading frame 45                            | -0.1345 | 0.0228 |
| 1553350_at   | FAM123C   | family with sequence similarity 123C                          | -0.1409 | 0.0206 |
| 1553359_at   | FBXL18    | F-box and leucine-rich repeat protein 18                      | -0.1987 | 0.0211 |
| 1553367_a_at | COX6B2    | cytochrome c oxidase subunit VIb polypeptide 2 (testis)       | -0.1735 | 0.0227 |
| 1553372_at   | FLJ23865  | hypothetical protein FLJ23865                                 | -0.2212 | 0.0346 |
| 1553395_a_at | CD200R1   | CD200 receptor 1                                              | -0.1809 | 0.0074 |
| 1553396_a_at | CCDC13    | coiled-coil domain containing 13                              | -0.319  | 0.0347 |
| 1553412_at   | AGBL4     | ATP/GTP binding protein-like 4                                | -0.1294 | 0.0137 |
| 1553417_at   | C11orf44  | chromosome 11 open reading frame 44                           | -0.1671 | 0.0002 |
| 1553435_at   | C18orf15  | chromosome 18 open reading frame 15                           | -0.141  | 0.013  |
| 1553438_at   | C11orf72  | chromosome 11 open reading frame 72                           | -0.1556 | 0.0233 |
| 1553454_at   | RPTN      | repetin                                                       | -0.1023 | 0.0336 |
| 1553482_at   | C15orf32  | chromosome 15 open reading frame 32                           | -0.1092 | 0.0352 |
| 1553483_at   | TSGA10IP  | testis specific; 10 interacting protein                       | -0.1732 | 0.0198 |
| 1553486_a_at | C17orf78  | chromosome 17 open reading frame 78                           | -0.1092 | 0.043  |
| 1553502_a_at | PALM2     | PALM2-AKAP2 protein, paralemmin 2                             | -0.1168 | 0.0464 |
| 1553512_at   | HOXC12    | homeobox C12                                                  | -0.1738 | 0.0062 |
| 1553514_a_at | VNN3      | vanin 3                                                       | -0.1615 | 0.0379 |
| 1553523_at   | NLRP14    | NLR family; pyrin domain containing 14                        | -0.1149 | 0.0275 |
| 1553537_at   | KRT73     | keratin 73                                                    | -0.1733 | 0.0031 |
| 1553544_at   | GPR101    | G protein-coupled receptor 101                                | -0.1207 | 0.0349 |
| 1553545_at   | ILDR1     | immunoglobulin-like domain containing receptor 1              | -0.218  | 0.0005 |
| 1553552_at   | TAAR8     | trace amine associated receptor 8                             | -0.1117 | 0.0243 |
| 1553566_at   | C12orf53  | chromosome 12 open reading frame 53                           | -0.1385 | 0.0431 |
| 1553573_s_at | EFNA2     | ephrin-A2                                                     | -0.1357 | 0.0047 |
| 1553583_a_at | THRSP     | thyroid hormone responsive (SPOT14 homolog; rat)              | -0.3804 | 0.0003 |
| 1553586_at   | LOC283932 | hypothetical protein LOC283932                                | -0.1241 | 0.0259 |
| 1553587_a_at | POLE4     | polymerase (DNA-directed); epsilon 4 (p12 subunit)            | -1.0933 | 0.0042 |
| 1553599_a_at | SYCP3     | synaptonemal complex protein 3                                | -0.2746 | 0.0012 |
| 1553629_a_at | FAM71B    | family with sequence similarity 71; member B                  | -0.1356 | 0.0368 |
| 1553633_s_at | NHEDC1    | Na <sup>+</sup> /H <sup>+</sup> exchanger domain containing 1 | -0.2159 | 0.0043 |
| 1553637_s_at | TMCO5     | transmembrane and coiled-coil domains 5                       | -0.1291 | 0.0219 |
| 1553644_at   | C14orf49  | chromosome 14 open reading frame 49                           | -0.1681 | 0.0318 |
| 1553663_a_at | LOC653419 | similar to preproneuropeptide B                               | -0.2464 | 0.0164 |
| 1553695_a_at | NLRX1     | NLR family member X1                                          | -0.4226 | 0.0091 |

|              |           |                                                            |         |        |
|--------------|-----------|------------------------------------------------------------|---------|--------|
| 1553727_at   | B4GALNT3  | beta-1,4-N-acetyl-galactosaminyl transferase 3             | -0.2572 | 0.0011 |
| 1553730_x_at | LRRC43    | leucine rich repeat containing 43                          | -0.1353 | 0.0495 |
| 1553736_at   | CCDC131   | coiled-coil domain containing 131                          | -0.5124 | 0      |
| 1553756_at   | C9orf70   | chromosome 9 open reading frame 70                         | -0.124  | 0.0218 |
| 1553757_at   | IQCG      | IQ motif containing G                                      | -0.1394 | 0.0472 |
| 1553761_at   | C22orf30  | chromosome 22 open reading frame 30                        | -0.1242 | 0.0112 |
| 1553785_at   | RASGEF1B  | RasGEF domain family; member 1B                            | -0.1548 | 0.0103 |
| 1553787_at   | C11orf45  | chromosome 11 open reading frame 45                        | -0.4066 | 0      |
| 1553796_at   | FLJ30594  | hypothetical locus FLJ30594                                | -0.1698 | 0.0066 |
| 1553803_at   | C17orf46  | chromosome 17 open reading frame 46                        | -0.2194 | 0.0456 |
| 1553804_a_at | C17orf46  | chromosome 17 open reading frame 46                        | -0.2005 | 0.0287 |
| 1553811_at   | MGC14436  | hypothetical protein MGC14436                              | -0.1499 | 0.0063 |
| 1553826_a_at | LOC146325 | similar to hypothetical protein FLJ13841                   | -0.2172 | 0.0004 |
| 1553844_a_at | C10orf67  | chromosome 10 open reading frame 67                        | -0.1305 | 0.0111 |
| 1553845_x_at | C10orf67  | chromosome 10 open reading frame 67                        | -0.101  | 0.0412 |
| 1553847_a_at | SPERT     | spermatid associated                                       | -0.1305 | 0.0235 |
| 1553860_at   | DCST1     | DC-STAMP domain containing 1                               | -0.1374 | 0.0046 |
| 1553872_at   | MGC33894  | transcript expressed during hematopoiesis 2                | -0.1542 | 0.0335 |
| 1553880_at   | C10orf91  | chromosome 10 open reading frame 91                        | -0.1397 | 0.0262 |
| 1553882_at   |           |                                                            | -0.1414 | 0.018  |
| 1553893_at   | CCDC105   | coiled-coil domain containing 105                          | -0.1897 | 0.0116 |
| 1553895_at   | C11orf42  | chromosome 11 open reading frame 42                        | -0.1778 | 0.0013 |
| 1553906_s_at | FGD2      | FYVE; RhoGEF and PH domain containing 2                    | -2.1264 | 0      |
| 1553918_at   | C21orf129 | chromosome 21 open reading frame 129                       | -0.1759 | 0.0015 |
| 1553927_at   | C7orf33   | chromosome 7 open reading frame 33                         | -0.1391 | 0.028  |
| 1553945_at   | GPHB5     | glycoprotein hormone beta 5                                | -0.1517 | 0.0187 |
| 1553946_at   | DCD       | dermcidin                                                  | -0.1197 | 0.0261 |
| 1553954_at   | ALG14     | asparagine-linked glycosylation 14 homolog (S. cerevisiae) | -1.2447 | 0.0001 |
| 1553955_at   | CCDC128   | coiled-coil domain containing 128                          | -0.8822 | 0.0046 |
| 1553960_at   | SNX21     | sorting nexin family member 21                             | -1.6185 | 0      |
| 1553961_s_at | SNX21     | sorting nexin family member 21                             | -1.8627 | 0      |
| 1553971_a_at | GATS      | opposite strand transcription unit to STAG3                | -0.7744 | 0.0003 |
| 1553974_at   | LOC128977 | hypothetical protein LOC128977                             | -1.8195 | 0      |
| 1553978_at   | MEF2B     | myocyte enhancer factor 2B                                 | -0.8836 | 0.0035 |
| 1554003_at   | RGNEF     | Rho-guanine nucleotide exchange factor                     | -1.502  | 0.0004 |



|              |           |                                                             |         |        |
|--------------|-----------|-------------------------------------------------------------|---------|--------|
| 1554004_a_at | RGNEF     | Rho-guanine nucleotide exchange factor                      | -1.2802 | 0.0016 |
| 1554014_at   | CHD2      | chromodomain helicase DNA binding protein 2                 | -1.057  | 0.0014 |
| 1554022_at   | CCDC13    | coiled-coil domain containing 13                            | -0.116  | 0.0209 |
| 1554041_at   | C20orf141 | chromosome 20 open reading frame 141                        | -0.114  | 0.0357 |
| 1554044_a_at | MRAP      | melanocortin 2 receptor accessory protein                   | -3.903  | 0      |
| 1554049_s_at | WDR42A    | WD repeat domain 42A                                        | -0.4057 | 0.0005 |
| 1554065_at   | FAM125B   | family with sequence similarity 125; member B               | -0.1229 | 0.0325 |
| 1554069_at   | EPHA8     | EPH receptor A8                                             | -0.1374 | 0.04   |
| 1554080_at   | RQCD1     | RCD1 required for cell differentiation1 homolog (S. pombe)  | -1.136  | 0.0064 |
| 1554117_at   | CCDC60    | coiled-coil domain containing 60                            | -0.2529 | 0.0003 |
| 1554148_a_at | SLC33A1   | solute carrier family 33 (acetyl-CoA transporter); member 1 | -1.1572 | 0.0004 |
| 1554149_at   | CLDND1    | claudin domain containing 1                                 | -0.4606 | 0.0325 |
| 1554157_a_at | WFDC8     | WAP four-disulfide core domain 8                            | -0.1006 | 0.0278 |
| 1554173_at   | CD300LB   | CD300 molecule-like family member b                         | -0.2614 | 0.0109 |
| 1554176_a_at | C3orf33   | chromosome 3 open reading frame 33                          | -0.3138 | 0.0064 |
| 1554188_at   | C11orf53  | chromosome 11 open reading frame 53                         | -0.1226 | 0.0155 |
| 1554192_s_at | C4orf23   | chromosome 4 open reading frame 23                          | -0.1125 | 0.0399 |
| 1554201_at   | CABP4     | calcium binding protein 4                                   | -0.3032 | 0.0275 |
| 1554205_s_at | ICA1L     | islet cell autoantigen 1;69kDa-like                         | -0.2154 | 0.0017 |
| 1554206_at   | TMLHE     | trimethyllysine hydroxylase; epsilon                        | -0.4456 | 0.01   |
| 1554210_at   | ZCCHC13   | zinc finger; CCHC domain containing 13                      | -0.1849 | 0.002  |
| 1554222_at   | MGC45922  | hypothetical gene MGC45922                                  | -0.2569 | 0.0365 |
| 1554237_at   | SDCCAG8   | serologically defined colon cancer antigen 8                | -0.2256 | 0.0208 |
| 1554242_a_at | COCH      | coagulation factor C homolog; cochlin (Limulus polyphemus)  | -0.7185 | 0.0012 |
| 1554246_at   | C1orf210  | chromosome 1 open reading frame 210                         | -0.1685 | 0.0376 |
| 1554259_at   | GPSP1     | G-protein signaling modulator 1 (AGS3-like; C. elegans)     | -0.177  | 0.0088 |
| 1554261_at   | KLHL29    | kelch-like 29 (Drosophila)                                  | -0.1035 | 0.009  |
| 1554262_s_at | KLHL29    | kelch-like 29 (Drosophila)                                  | -0.2252 | 0.0014 |
| 1554281_at   |           |                                                             | -0.3168 | 0.0004 |
| 1554286_at   | FLJ25758  | hypothetical locus FLJ25758                                 | -0.1137 | 0.0284 |
| 1554296_at   | CYP19A1   | cytochrome P450; family 19; subfamily A; polypeptide 1      | -0.9638 | 0.0001 |
| 1554312_at   | RNF170    | ring finger protein 170                                     | -0.1601 | 0.0173 |
| 1554318_at   | LOC541473 | FK506 binding protein 6; 36kDa pseudogene                   | -0.1456 | 0.0444 |
| 1554341_a_at | HEL308    | DNA helicase HEL308                                         | -0.9075 | 0.0022 |
| 1554342_s_at | HEL308    | DNA helicase HEL308                                         | -1.2559 | 0.0002 |

|              |           |                                                                                                                                                          |         |        |
|--------------|-----------|----------------------------------------------------------------------------------------------------------------------------------------------------------|---------|--------|
| 1554344_s_at | AQP12A    | aquaporin 12A, similar to aquaporin 12A                                                                                                                  | -0.1648 | 0.0243 |
| 1554372_at   |           |                                                                                                                                                          | -0.1716 | 0.0369 |
| 1554377_a_at | CNTNAP4   | contactin associated protein-like 4                                                                                                                      | -0.1123 | 0.0339 |
| 1554380_at   | NEK11     | NIMA (never in mitosis gene a)- related kinase 11                                                                                                        | -0.1189 | 0.0012 |
| 1554386_at   | CST9      | cystatin 9 (testatin)                                                                                                                                    | -0.1382 | 0.0079 |
| 1554405_a_at | C21orf100 | chromosome 21 open reading frame 100                                                                                                                     | -0.1906 | 0.0029 |
| 1554418_s_at | SPOCK3    | sparc/osteonectin; cwcv and kazal-like domains proteoglycan (testican) 3                                                                                 | -0.1336 | 0.018  |
| 1554428_s_at | NLGN2     | neuroligin 2                                                                                                                                             | -0.1531 | 0.0399 |
| 1554438_at   | KIAA1217  | KIAA1217                                                                                                                                                 | -0.5089 | 0.0002 |
| 1554442_at   | BEST1     | bestrophin 1                                                                                                                                             | -0.3032 | 0.0041 |
| 1554443_s_at | BEST1     | bestrophin 1                                                                                                                                             | -0.2056 | 0.0017 |
| 1554459_s_at | CFHR3     | complement factor H-related 3                                                                                                                            | -0.2032 | 0      |
| 1554462_a_at | DNAJB9    | DnaJ (Hsp40) homolog; subfamily B; member 9                                                                                                              | -0.8733 | 0.0271 |
| 1554474_a_at | MOXD1     | monooxygenase; DBH-like 1                                                                                                                                | -2.7785 | 0      |
| 1554483_at   | TMEM37    | transmembrane protein 37                                                                                                                                 | -0.2996 | 0.0142 |
| 1554485_s_at | TMEM37    | transmembrane protein 37                                                                                                                                 | -1.0848 | 0.006  |
| 1554509_a_at | C10orf97  | chromosome 10 open reading frame 97                                                                                                                      | -0.6082 | 0.0081 |
| 1554517_x_at | LOC203274 | CDNA clone IMAGE:3941306, Full-length cDNA clone CS0DD001YM12 of Neuroblastoma Cot 50-normalized of Homo sapiens (human), Hypothetical protein LOC203274 | -0.1316 | 0.0396 |
| 1554531_at   | TTC12     | tetratricopeptide repeat domain 12                                                                                                                       | -0.2071 | 0.0011 |
| 1554549_a_at | WDR20     | WD repeat domain 20                                                                                                                                      | -0.4716 | 0.0023 |
| 1554559_at   | GPR62     | G protein-coupled receptor 62                                                                                                                            | -0.2523 | 0.0017 |
| 1554571_at   | APBB1IP   | amyloid beta (A4) precursor protein-binding; family B; member 1 interacting protein                                                                      | -0.1355 | 0.0038 |
| 1554594_at   | LOC201175 | hypothetical protein LOC201175                                                                                                                           | -0.1668 | 0.0012 |
| 1554616_at   | SERPINB8  | serpin peptidase inhibitor; clade B (ovalbumin); member 8                                                                                                | -0.1848 | 0.0094 |
| 1554627_a_at | ASCC1     | activating signal cointegrator 1 complex subunit 1                                                                                                       | -1.2974 | 0      |
| 1554648_a_at | DUOXA1    | dual oxidase maturation factor 1                                                                                                                         | -0.2019 | 0.0089 |
| 1554650_a_at |           | CDNA clone IMAGE:4476475                                                                                                                                 | -0.2014 | 0.0184 |
| 1554652_s_at | MAST4     | microtubule associated serine/threonine kinase family member 4                                                                                           | -0.1895 | 0.0282 |
| 1554668_a_at | C1orf179  | chromosome 1 open reading frame 179                                                                                                                      | -0.1753 | 0      |
| 1554680_s_at | KCNS2     | potassium voltage-gated channel; delayed-rectifier; subfamily S; member 2                                                                                | -0.1727 | 0.0134 |
| 1554683_a_at | MGC50722  | hypothetical MGC50722                                                                                                                                    | -0.2538 | 0.0028 |
| 1554694_at   | CCNY      | cyclin Y                                                                                                                                                 | -0.1514 | 0.0039 |

|              |              |                                                                                                   |         |        |
|--------------|--------------|---------------------------------------------------------------------------------------------------|---------|--------|
| 1554707_at   | C9orf68      | chromosome 9 open reading frame 68                                                                | -0.152  | 0.0103 |
| 1554710_at   | KCNMB1       | potassium large conductance calcium-activated channel; subfamily M; beta member 1                 | -0.1555 | 0.0061 |
| 1554732_at   | MGC24125     | hypothetical protein MGC24125                                                                     | -0.6454 | 0.0007 |
| 1554733_at   | MGC24125     | hypothetical protein MGC24125                                                                     | -1.6163 | 0.026  |
| 1554745_at   | RALGPS1      | Ral GEF with PH domain and SH3 binding motif 1                                                    | -0.1401 | 0.0188 |
| 1554751_at   |              | CDNA clone IMAGE:3528357                                                                          | -0.156  | 0.0251 |
| 1554752_a_at |              | CDNA clone IMAGE:3528357                                                                          | -0.1773 | 0.0175 |
| 1554759_at   | SNIP         | SNAP25-interacting protein                                                                        | -0.209  | 0.024  |
| 1554763_at   | UBE2DNL      | ubiquitin-conjugating enzyme E2D N-terminal like                                                  | -0.1508 | 0.039  |
| 1554765_a_at | C11orf64     | chromosome 11 open reading frame 64                                                               | -0.2003 | 0.0412 |
| 1554776_at   | ZFP42        | zinc finger protein 42 homolog (mouse)                                                            | -0.1212 | 0.0098 |
| 1554779_s_at | PHLDB2       | pleckstrin homology-like domain; family B; member 2                                               | -0.4443 | 0.0001 |
| 1554795_a_at | FBLIM1       | filamin binding LIM protein 1                                                                     | -0.2349 | 0.0268 |
| 1554801_at   | C5orf40      | chromosome 5 open reading frame 40                                                                | -0.1849 | 0.0164 |
| 1554809_at   | LOC389199    | hypothetical gene supported by BC031673                                                           | -0.2333 | 0.0038 |
| 1554821_a_at | ZBED1        | zinc finger; BED-type containing 1                                                                | -2.8822 | 0      |
| 1554827_a_at | ADCY7        | adenylate cyclase 7                                                                               | -0.1516 | 0.0047 |
| 1554833_at   | MCTP2        | multiple C2 domains; transmembrane 2                                                              | -0.162  | 0.0005 |
| 1554847_at   | ATP6V1B1     | ATPase; H+ transporting; lysosomal 56/58kDa; V1 subunit B1 (Renal tubular acidosis with deafness) | -0.1546 | 0.039  |
| 1554872_a_at | HMGCLL1      | 3-hydroxymethyl-3-methylglutaryl-Coenzyme A lyase-like 1                                          | -0.1811 | 0.0175 |
| 1554880_at   | DKFZP434K028 | DKFZP434K028 protein                                                                              | -0.1453 | 0.0047 |
| 1554895_a_at | RHBDL2       | rhomboid; veinlet-like 2 (Drosophila)                                                             | -0.1615 | 0.019  |
| 1554899_s_at | FCER1G       | Fc fragment of IgE; high affinity I; receptor for; gamma polypeptide                              | -2.5655 | 0.0004 |
| 1554906_a_at | MPHOSPH6     | M-phase phosphoprotein 6                                                                          | -0.4298 | 0.042  |
| 1554941_at   | KLHL14       | kelch-like 14 (Drosophila)                                                                        | -0.1614 | 0.0155 |
| 1554942_a_at | KLHL14       | kelch-like 14 (Drosophila)                                                                        | -0.1799 | 0.0114 |
| 1554949_at   | LOC554174    | hypothetical LOC554174                                                                            | -0.2117 | 0.0032 |
| 1554966_a_at | FILIP1L      | filamin A interacting protein 1-like                                                              | -2.0874 | 0.0029 |
| 1554970_at   | PDILT        | protein disulfide isomerase-like protein of the testis                                            | -0.1086 | 0.0171 |
| 1554974_at   | ACY3         | aspartoacylase (aminocyclase) 3                                                                   | -0.1087 | 0.0238 |
| 1554989_at   | KIAA0317     | KIAA0317                                                                                          | -0.1252 | 0.0125 |
| 1554992_at   | RASGRF1      | Ras protein-specific guanine nucleotide-releasing factor 1                                        | -0.2411 | 0.023  |
| 1555000_at   |              | OK/SW-CL.36                                                                                       | -0.159  | 0.0019 |
| 1555028_at   | BRD3         | bromodomain containing 3                                                                          | -0.1525 | 0.0006 |
| 1555031_at   |              | Angrgm-52                                                                                         | -0.1132 | 0.0103 |

|              |           |                                                                                     |         |        |
|--------------|-----------|-------------------------------------------------------------------------------------|---------|--------|
| 1555037_a_at | IDH1      | isocitrate dehydrogenase 1 (NADP+); soluble                                         | -0.7302 | 0.001  |
| 1555040_at   | C12orf33  | chromosome 12 open reading frame 33                                                 | -0.1078 | 0.0396 |
| 1555044_a_at | KBTBD5    | kelch repeat and BTB (POZ) domain containing 5                                      | -0.2338 | 0.0001 |
| 1555052_a_at | SYT9      | synaptotagmin IX                                                                    | -0.273  | 0.0036 |
| 1555053_at   | SYT9      | synaptotagmin IX                                                                    | -0.1089 | 0.0068 |
| 1555060_a_at | IKZF2     | IKAROS family zinc finger 2 (Helios)                                                | -0.1512 | 0.0317 |
| 1555076_at   | ARHGAP25  | Rho GTPase activating protein 25                                                    | -0.1383 | 0.0004 |
| 1555083_at   | MGC34774  | ribosomal protein L13A pseudogene                                                   | -0.1953 | 0.0008 |
| 1555084_at   |           |                                                                                     | -0.21   | 0.0234 |
| 1555099_at   | MPP4      | membrane protein; palmitoylated 4 (MAGUK p55 subfamily member 4)                    | -0.1296 | 0.0223 |
| 1555100_at   | C2orf13   | chromosome 2 open reading frame 13                                                  | -0.1509 | 0.0086 |
| 1555116_s_at | SLC11A1   | solute carrier family 11 (proton-coupled divalent metal ion transporters); member 1 | -0.1433 | 0.0449 |
| 1555129_at   |           |                                                                                     | -0.1136 | 0.0242 |
| 1555141_a_at | NHEDC1    | Na <sup>+</sup> /H <sup>+</sup> exchanger domain containing 1                       | -0.4663 | 0      |
| 1555142_at   | NHEDC1    | Na <sup>+</sup> /H <sup>+</sup> exchanger domain containing 1                       | -0.1125 | 0.0415 |
| 1555159_at   | TMEM74    | Transmembrane protein 74                                                            | -0.1084 | 0.0284 |
| 1555165_a_at | PGPEP1    | pyroglutamyl-peptidase I                                                            | -0.2191 | 0.0071 |
| 1555191_a_at | FHL5      | four and a half LIM domains 5                                                       | -0.7196 | 0      |
| 1555204_at   |           |                                                                                     | -0.1439 | 0.006  |
| 1555205_at   |           |                                                                                     | -0.1146 | 0.0237 |
| 1555209_at   | LOC439951 | hypothetical LOC439951                                                              | -0.1513 | 0.0036 |
| 1555212_at   | OR8B8     | olfactory receptor; family 8; subfamily B; member 8                                 | -0.1525 | 0.0049 |
| 1555217_at   | UBE2W     | ubiquitin-conjugating enzyme E2W (putative)                                         | -0.1384 | 0.0137 |
| 1555231_a_at | C21orf88  | chromosome 21 open reading frame 88                                                 | -0.1432 | 0.0263 |
| 1555236_a_at | PGC       | progastricsin (pepsinogen C)                                                        | -0.1481 | 0.0462 |
| 1555237_at   |           | CDNA clone IMAGE:4336144                                                            | -0.1331 | 0.0173 |
| 1555238_at   | TIP39     | tuberoinfundibular 39 residue protein precursor                                     | -0.2575 | 0.0031 |
| 1555245_s_at | RP1L1     | retinitis pigmentosa 1-like 1                                                       | -0.1467 | 0.0008 |
| 1555265_at   | ABCC13    | ATP-binding cassette; sub-family C (CFTR/MRP); member 13                            | -0.1058 | 0.0347 |
| 1555286_at   | CDKL1     | cyclin-dependent kinase-like 1 (CDC2-related kinase)                                | -0.108  | 0.0481 |
| 1555289_at   | SEC16B    | SEC16 homolog B ( <i>S. cerevisiae</i> )                                            | -0.1089 | 0.0308 |
| 1555298_a_at | VWA3B     | von Willebrand factor A domain containing 3B                                        | -0.1121 | 0.0053 |
| 1555304_a_at | KCNH5     | potassium voltage-gated channel; subfamily H (eag-related); member 5                | -0.239  | 0.0002 |
| 1555306_a_at | ECE2      | endothelin converting enzyme 2                                                      | -0.1524 | 0.0228 |

|              |              |                                                                 |         |        |
|--------------|--------------|-----------------------------------------------------------------|---------|--------|
| 1555313_a_at | MCF2         | MCF.2 cell line derived transforming sequence                   | -1.5122 | 0.0355 |
| 1555320_a_at | STAB1        | stabilin 1                                                      | -0.1609 | 0.0026 |
| 1555321_at   | ACOT11       | acyl-CoA thioesterase 11                                        | -0.1412 | 0.0103 |
| 1555339_at   | RAP1A        | RAP1A; member of RAS oncogene family                            | -0.1478 | 0.012  |
| 1555377_at   | OR4D2        | olfactory receptor; family 4; subfamily D; member 2             | -0.1594 | 0.0417 |
| 1555379_at   | MGC52498     | hypothetical protein MGC52498                                   | -0.1609 | 0.0088 |
| 1555395_at   | AKAP12       | A kinase (PRKA) anchor protein (gravin) 12                      | -0.1429 | 0.0119 |
| 1555396_s_at | LOC340602    | similar to CG32656-PA                                           | -0.1388 | 0.0182 |
| 1555401_at   | SOHLH2       | spermatogenesis and oogenesis specific basic helix-loop-helix 2 | -0.1111 | 0.0303 |
| 1555403_a_at | CDH19        | cadherin 19; type 2                                             | -0.2455 | 0      |
| 1555404_a_at | DUOXA1       | dual oxidase maturation factor 1                                | -0.1936 | 0.0032 |
| 1555407_s_at | FGD3         | FYVE; RhoGEF and PH domain containing 3                         | -0.1112 | 0.0161 |
| 1555456_at   |              | PRbBP-39                                                        | -0.1369 | 0.0062 |
| 1555465_at   | MCOLN2       | mucolipin 2                                                     | -0.8678 | 0.0065 |
| 1555483_x_at | FBLIM1       | filamin binding LIM protein 1                                   | -0.1369 | 0.0135 |
| 1555490_s_at | PDZD3        | PDZ domain containing 3                                         | -0.1279 | 0.0067 |
| 1555497_a_at | CYP4B1       | cytochrome P450; family 4; subfamily B; polypeptide 1           | -0.8782 | 0      |
| 1555499_a_at | IL28RA       | interleukin 28 receptor; alpha (interferon; lambda receptor)    | -0.1167 | 0.024  |
| 1555503_a_at | TMCC2        | transmembrane and coiled-coil domain family 2                   | -0.1641 | 0.0164 |
| 1555516_at   | FOXP2        | forkhead box P2                                                 | -0.1908 | 0.0225 |
| 1555523_a_at | FYCO1        | FYVE and coiled-coil domain containing 1                        | -0.1676 | 0.0283 |
| 1555540_at   | TGFB3        | transforming growth factor; beta 3                              | -0.1198 | 0.0361 |
| 1555545_at   | KLK2         | kallikrein-related peptidase 2                                  | -0.1899 | 0.0054 |
| 1555551_at   | SERPINB5     | serpin peptidase inhibitor; clade B (ovalbumin); member 5       | -0.1122 | 0.0434 |
| 1555553_a_at | SLC22A7      | solute carrier family 22 (organic anion transporter); member 7  | -0.2412 | 0.0004 |
| 1555554_at   | RP11-49G10.8 | breast cancer and salivary gland expression gene                | -0.1617 | 0.0307 |
| 1555579_s_at | PTPRM        | protein tyrosine phosphatase; receptor type; M                  | -1.0167 | 0.0272 |
| 1555580_at   |              |                                                                 | -0.1647 | 0.0472 |
| 1555585_a_at | FAM71B       | family with sequence similarity 71; member B                    | -0.2069 | 0.0061 |
| 1555587_at   | PDZRN3       | PDZ domain containing RING finger 3                             | -0.1211 | 0.0262 |
| 1555600_s_at | APOL4        | apolipoprotein L; 4                                             | -0.2458 | 0.0008 |
| 1555616_at   |              |                                                                 | -0.2466 | 0.0487 |
| 1555617_x_at |              |                                                                 | -0.2184 | 0.0173 |
| 1555620_a_at | PTGIR        | prostaglandin I2 (prostacyclin) receptor (IP)                   | -0.1815 | 0.0042 |
| 1555626_a_at | SLAMF1       | signaling lymphocytic activation molecule family member 1       | -0.2104 | 0.0026 |

|              |           |                                                                                |         |        |
|--------------|-----------|--------------------------------------------------------------------------------|---------|--------|
| 1555630_a_at | RAB34     | RAB34; member RAS oncogene family                                              | -4.0485 | 0      |
| 1555634_a_at | LILRA5    | leukocyte immunoglobulin-like receptor; subfamily A (with TM domain); member 5 | -0.146  | 0.0475 |
| 1555645_at   |           | FGF-2 activity-associated protein 2 (GAFA2)                                    | -0.1148 | 0.0131 |
| 1555646_at   |           |                                                                                | -0.119  | 0.0173 |
| 1555656_at   | CD300LG   | CD300 molecule-like family member g                                            | -0.1659 | 0.014  |
| 1555666_at   | PTPRS     | protein tyrosine phosphatase; receptor type; S                                 | -0.1504 | 0.0054 |
| 1555673_at   | LOC728285 | similar to keratin associated protein 2-4                                      | -0.1583 | 0.0064 |
| 1555678_at   | ST3GAL3   | ST3 beta-galactoside alpha-2,3-sialyltransferase 3                             | -0.199  | 0.0117 |
| 1555681_at   |           | MUSP1 (MUSP1)                                                                  | -0.1009 | 0.035  |
| 1555703_at   | ST3GAL3   | ST3 beta-galactoside alpha-2,3-sialyltransferase 3                             | -0.3986 | 0.0006 |
| 1555724_s_at | TAGLN     | transgelin                                                                     | -3.1854 | 0      |
| 1555728_a_at | MS4A4A    | membrane-spanning 4-domains; subfamily A; member 4                             | -2.1177 | 0.0007 |
| 1555740_a_at | MRAP      | melanocortin 2 receptor accessory protein                                      | -4.0406 | 0      |
| 1555741_at   | MRAP      | melanocortin 2 receptor accessory protein                                      | -2.2963 | 0      |
| 1555742_at   |           |                                                                                | -0.428  | 0.0059 |
| 1555746_at   | CD79B     | CD79b molecule; immunoglobulin-associated beta                                 | -0.2    | 0.0088 |
| 1555752_at   | STH       | saitohin                                                                       | -0.1174 | 0.0355 |
| 1555763_x_at | MKL1      | Megakaryoblastic leukemia (translocation) 1                                    | -0.2704 | 0.0168 |
| 1555764_s_at | TIMM10    | translocase of inner mitochondrial membrane 10 homolog (yeast)                 | -0.4582 | 0.0123 |
| 1555765_a_at | GNG4      | guanine nucleotide binding protein (G protein); gamma 4                        | -0.3078 | 0.0039 |
| 1555775_a_at | LOC651951 | similar to zygote arrest 1, zygote arrest 1                                    | -0.1163 | 0.0216 |
| 1555792_a_at | CCDC116   | coiled-coil domain containing 116                                              | -0.1569 | 0.0363 |
| 1555809_at   | CRISPLD2  | cysteine-rich secretory protein LCCL domain containing 2                       | -0.1825 | 0.0234 |
| 1555811_at   | ARHGDI1B  | Rho GDP dissociation inhibitor (GDI) beta                                      | -0.2092 | 0.0124 |
| 1555812_a_at | ARHGDI1B  | Rho GDP dissociation inhibitor (GDI) beta                                      | -1.1357 | 0.0126 |
| 1555819_s_at | SAMD14    | sterile alpha motif domain containing 14                                       | -0.1022 | 0.0251 |
| 1555822_at   | FAM138B   | family with sequence similarity 138; member B                                  | -0.1659 | 0.0059 |
| 1555867_at   | GNG4      | guanine nucleotide binding protein (G protein); gamma 4                        | -0.4172 | 0.012  |
| 1555872_a_at | MGC21881  | hypothetical locus MGC21881                                                    | -0.8127 | 0.0213 |
| 1555874_x_at | MGC21881  | hypothetical locus MGC21881                                                    | -1.2074 | 0.0004 |
| 1555878_at   | RPS24     | Ribosomal protein S24                                                          | -1.6418 | 0.0009 |
| 1555886_at   | PDSS2     | prenyl (decaprenyl) diphosphate synthase; subunit 2                            | -2.1594 | 0      |
| 1555889_a_at | CRTAP     | cartilage associated protein                                                   | -0.3758 | 0.027  |

|              |               |                                                                              |         |        |
|--------------|---------------|------------------------------------------------------------------------------|---------|--------|
| 1555897_at   | AOF2          | amine oxidase (flavin containing) domain 2                                   | -0.5693 | 0.0163 |
| 1555914_a_at | FLJ20433      | hypothetical protein FLJ20433                                                | -0.1408 | 0.0449 |
| 1555950_a_at | CD55          | CD55 molecule; decay accelerating factor for complement (Cromer blood group) | -2.3093 | 0      |
| 1555962_at   | B3GNT7        | UDP-GlcNAc:betaGal beta-1;3-N-acetylglucosaminyltransferase 7                | -1.5887 | 0      |
| 1555963_x_at | B3GNT7        | UDP-GlcNAc:betaGal beta-1;3-N-acetylglucosaminyltransferase 7                | -1.7404 | 0      |
| 1555979_at   | FLJ39609      | Hypothetical protein FLJ39609                                                | -0.1671 | 0.0003 |
| 1555980_a_at | FLJ39609      | Hypothetical protein FLJ39609                                                | -0.2623 | 0.0004 |
| 1555990_at   | RP1-127L4.6   | hypothetical protein LOC150297                                               | -0.1337 | 0.0091 |
| 1555995_a_at |               |                                                                              | -0.1307 | 0.0098 |
| 1555997_s_at | IGFBP5        | insulin-like growth factor binding protein 5                                 | -1.8269 | 0      |
| 1556001_at   | LOC284939     | hypothetical protein LOC284939                                               | -0.2365 | 0.0009 |
| 1556014_at   | MESP2         | mesoderm posterior 2 homolog (mouse)                                         | -0.1498 | 0.0468 |
| 1556017_at   | NBEAL2        | neurobeachin-like 2                                                          | -0.1888 | 0.0003 |
| 1556026_at   | IDS           | iduronate 2-sulfatase (Hunter syndrome)                                      | -0.3099 | 0.0477 |
| 1556030_at   | SMTN          | Smoothelin                                                                   | -0.2866 | 0      |
| 1556037_s_at | HHIP          | hedgehog interacting protein                                                 | -0.4186 | 0      |
| 1556056_at   | SNF1LK2       | SNF1-like kinase 2                                                           | -0.5153 | 0      |
| 1556075_at   |               |                                                                              | -0.1287 | 0.0411 |
| 1556107_at   |               | MRNA; cDNA DKFZp667C1617 (from clone DKFZp667C1617)                          | -0.3024 | 0.0149 |
| 1556149_at   | ARVCF         | armadillo repeat gene deletes in velocardiofacial syndrome                   | -0.118  | 0.0244 |
| 1556163_a_at | IGSF3         | immunoglobulin superfamily; member 3                                         | -0.1542 | 0.0028 |
| 1556185_a_at |               | CDNA clone IMAGE:5260162                                                     | -2.9956 | 0      |
| 1556232_at   | KIF6          | kinesin family member 6                                                      | -0.1413 | 0.0066 |
| 1556247_a_at |               | CDNA FLJ40468 fis; clone TESTI2042400                                        | -0.2314 | 0.002  |
| 1556253_s_at |               | CDNA FLJ37989 fis; clone CTONG2011676                                        | -0.4943 | 0.0237 |
| 1556271_at   |               | CDNA clone IMAGE:4830283                                                     | -0.129  | 0.0035 |
| 1556274_at   |               | CDNA clone IMAGE:5271140                                                     | -0.3309 | 0.0012 |
| 1556281_at   |               | Full length insert cDNA clone YI54A07                                        | -0.1098 | 0.0457 |
| 1556283_s_at | FGFR1OP2      | FGFR1 oncogene partner 2                                                     | -1.3272 | 0.0016 |
| 1556292_s_at | DKFZp564N2472 | hypothetical protein DKFZp564N2472                                           | -0.1353 | 0.0292 |
| 1556294_at   |               | MRNA; cDNA DKFZp547P0115 (from clone DKFZp547P0115)                          | -0.1252 | 0.037  |
| 1556296_at   |               | CDNA clone IMAGE:5295605                                                     | -0.1659 | 0.0067 |
| 1556304_s_at |               | CDNA clone IMAGE:4829494                                                     | -0.1646 | 0.0174 |
| 1556312_at   | FLJ34931      | similar to cDNA sequence BC027072                                            | -0.1039 | 0.0183 |
| 1556321_a_at |               | MRNA full length insert cDNA clone EUROIMAGE 283668                          | -0.9681 | 0      |

|              |              |                                                     |         |        |
|--------------|--------------|-----------------------------------------------------|---------|--------|
| 1556328_at   |              | CDNA clone IMAGE:5301690                            | -0.4288 | 0      |
| 1556329_a_at |              | CDNA clone IMAGE:5301690                            | -1.1963 | 0      |
| 1556332_at   |              | CDNA FLJ38412 fis; clone FEBRA2009385               | -0.4993 | 0      |
| 1556340_at   | MAPK12       | mitogen-activated protein kinase 12                 | -0.3563 | 0.0069 |
| 1556356_at   | ERICH1       | glutamate-rich 1                                    | -0.1868 | 0.008  |
| 1556361_s_at | ANKRD13C     | ankyrin repeat domain 13C                           | -1.1885 | 0      |
| 1556365_at   | RP3-398D13.1 | hypothetical protein FLJ33708                       | -0.1918 | 0.0016 |
| 1556374_s_at |              | CDNA clone IMAGE:5270126                            | -0.13   | 0.0304 |
| 1556385_at   |              | CDNA FLJ39926 fis; clone SPLEN2021157               | -0.5426 | 0      |
| 1556411_s_at | KY           | kyphoscoliosis peptidase                            | -0.2265 | 0.0002 |
| 1556413_a_at |              | Full length insert cDNA clone ZE08G04               | -0.1055 | 0.0287 |
| 1556426_at   | HEXA         | hexosaminidase A (alpha polypeptide)                | -0.2105 | 0.001  |
| 1556427_s_at | LOC221091    | similar to hypothetical protein                     | -1.9585 | 0      |
| 1556435_at   | LOC400622    | hypothetical LOC400622                              | -0.1791 | 0.0016 |
| 1556447_at   | LOC285370    | hypothetical protein LOC285370                      | -0.1049 | 0.0459 |
| 1556451_at   |              | MRNA; cDNA DKFZp667B1520 (from clone DKFZp667B1520) | -0.3653 | 0.0014 |
| 1556456_at   | FLJ39739     | hypothetical FLJ39739                               | -0.2345 | 0.0057 |
| 1556467_at   | ZNF80        | Zinc finger protein 80                              | -0.1733 | 0.007  |
| 1556477_a_at | LOC283485    | hypothetical protein LOC283485                      | -0.1297 | 0.0337 |
| 1556496_a_at |              | Full length insert cDNA clone ZD79H01               | -0.1216 | 0.0456 |
| 1556507_at   |              | CDNA clone IMAGE:5267328                            | -0.2328 | 0.0165 |
| 1556508_s_at |              | CDNA clone IMAGE:5267328                            | -0.1332 | 0.0179 |
| 1556513_at   | ZNF573       | zinc finger protein 573                             | -0.1483 | 0.0027 |
| 1556514_at   | LOC338809    | hypothetical protein LOC338809                      | -0.1361 | 0.0162 |
| 1556529_a_at | LOC285326    | hypothetical protein LOC285326                      | -0.1496 | 0.0421 |
| 1556533_at   | C17orf52     | chromosome 17 open reading frame 52                 | -0.1608 | 0.0267 |
| 1556558_s_at | FLJ36665     | hypothetical protein FLJ36665                       | -0.1961 | 0.007  |
| 1556573_s_at | LOC286178    | hypothetical protein LOC286178                      | -0.1045 | 0.0386 |
| 1556579_s_at | IGSF10       | immunoglobulin superfamily; member 10               | -1.6924 | 0.0001 |
| 1556606_at   | NAV2         | neuron navigator 2                                  | -0.6509 | 0.0005 |
| 1556607_at   | EHD4         | EH-domain containing 4                              | -0.2584 | 0.0094 |
| 1556645_s_at |              | Homo sapiens; clone IMAGE:6016214; mRNA             | -0.3754 | 0.0009 |
| 1556669_a_at |              | Full length insert cDNA clone YR71G12               | -0.1146 | 0.036  |
| 1556670_at   |              | CDNA FLJ25849 fis; clone TST08968                   | -0.1477 | 0.0082 |
| 1556671_s_at |              | CDNA FLJ25849 fis; clone TST08968                   | -0.2499 | 0.0009 |
| 1556695_a_at | FLJ42709     | Hypothetical gene supported by AK124699             | -0.6377 | 0      |
| 1556696_s_at | FLJ42709     | Hypothetical gene supported by AK124699             | -0.4996 | 0.0002 |



|              |           |                                                                                     |         |        |
|--------------|-----------|-------------------------------------------------------------------------------------|---------|--------|
| 1556706_at   |           | CDNA FLJ31687 fis; clone NT2RI2005473                                               | -0.162  | 0.0424 |
| 1556718_s_at |           | CDNA FLJ35483 fis; clone SMINT2008277                                               | -0.1803 | 0.0121 |
| 1556727_at   | PRCD      | progressive rod-cone degeneration                                                   | -0.1882 | 0.0165 |
| 1556739_at   | FLJ35785  | hypothetical protein FLJ35785, similar to golgi autoantigen; golgin subfamily a; 8A | -0.1339 | 0.0209 |
| 1556740_at   |           | CDNA FLJ35959 fis; clone TESTI2012444                                               | -0.1111 | 0.0386 |
| 1556747_a_at |           | CDNA FLJ39784 fis; clone SPLEN2002314                                               | -0.2534 | 0.0256 |
| 1556758_at   | C10orf18  | chromosome 10 open reading frame 18                                                 | -0.2862 | 0      |
| 1556775_at   |           | CDNA clone IMAGE:5271366                                                            | -0.536  | 0      |
| 1556797_at   | LOC386597 | hypothetical protein LOC386597                                                      | -0.3226 | 0.0269 |
| 1556805_at   |           | CDNA clone IMAGE:5314388                                                            | -0.4497 | 0      |
| 1556822_s_at | LOC116412 | Hypothetical protein BC012365                                                       | -0.1823 | 0.0057 |
| 1556827_at   | LOC339929 | hypothetical protein LOC339929                                                      | -0.2699 | 0.0012 |
| 1556829_at   | LOC732159 | TCDD-inducible poly(ADP-ribose) polymerase, hypothetical protein LOC732159          | -0.1859 | 0.01   |
| 1556844_at   |           | CDNA clone IMAGE:4827624                                                            | -0.1433 | 0.0071 |
| 1556852_a_at |           | CDNA FLJ33171 fis; clone ADRGL2000644                                               | -0.2783 | 0.0008 |
| 1556854_at   | LOC283501 | hypothetical protein LOC283501                                                      | -0.1923 | 0.0004 |
| 1556856_at   |           | CDNA FLJ25233 fis; clone STM01789                                                   | -0.1242 | 0.0123 |
| 1556883_a_at | LOC440896 | hypothetical gene supported by AK127288; AY343901                                   | -0.1446 | 0.0263 |
| 1556900_at   | LOC149773 | hypothetical protein LOC149773                                                      | -0.1551 | 0.0332 |
| 1556909_at   |           | CDNA clone IMAGE:4830327                                                            | -0.1659 | 0.0384 |
| 1556914_at   |           | CDNA clone IMAGE:4838482                                                            | -0.2343 | 0.0071 |
| 1556916_a_at |           | CDNA clone IMAGE:5295621                                                            | -0.1389 | 0.0362 |
| 1556928_at   |           | Full length insert cDNA clone ZE01F11                                               | -0.322  | 0      |
| 1556971_a_at |           | CDNA clone IMAGE:5272053                                                            | -0.1349 | 0.0337 |
| 1556989_at   |           | Full length insert cDNA clone YZ35C05                                               | -1.0579 | 0.0211 |
| 1556990_at   | PERP      | PERP; TP53 apoptosis effector                                                       | -0.1009 | 0.0385 |
| 1557004_at   | LOC285389 | hypothetical protein LOC285389                                                      | -0.1338 | 0.008  |
| 1557007_a_at |           | CDNA clone IMAGE:4826791                                                            | -0.1638 | 0.016  |
| 1557017_at   |           | CDNA clone IMAGE:5312582                                                            | -0.13   | 0.0076 |
| 1557018_a_at |           | CDNA clone IMAGE:5312582                                                            | -0.1923 | 0.0011 |
| 1557030_at   | GAB1      | GRB2-associated binding protein 1                                                   | -0.1235 | 0.0198 |
| 1557050_at   | HOXA2     | Homeobox A2                                                                         | -1.5376 | 0      |
| 1557051_s_at | HOXA2     | Homeobox A2                                                                         | -2.5652 | 0      |
| 1557105_a_at |           | MRNA; cDNA DKFZp686P1116 (from clone DKFZp686P1116)                                 | -0.1986 | 0.0147 |
| 1557116_at   | APOL6     | apolipoprotein L; 6                                                                 | -0.7767 | 0.0039 |
| 1557121_s_at |           | Homo sapiens; clone IMAGE:6045023; mRNA                                             | -0.6296 | 0.005  |

|              |              |                                                                                        |         |        |
|--------------|--------------|----------------------------------------------------------------------------------------|---------|--------|
| 1557122_s_at | GABRB2       | gamma-aminobutyric acid (GABA) A receptor; beta 2                                      | -1.6628 | 0      |
| 1557123_a_at | RP4-756G23.1 | hypothetical protein BC012882                                                          | -0.4557 | 0      |
| 1557146_a_at | FLJ32252     | hypothetical protein FLJ32252                                                          | -3.2077 | 0      |
| 1557226_a_at | LOC374569    | Similar to Lysophospholipase                                                           | -0.2242 | 0.0031 |
| 1557232_at   |              | CDNA clone IMAGE:4797260                                                               | -0.2399 | 0.0027 |
| 1557241_a_at |              | Full length insert cDNA clone ZD89B07                                                  | -0.212  | 0.0012 |
| 1557276_at   |              | CDNA clone IMAGE:4828503                                                               | -0.1444 | 0.0176 |
| 1557285_at   | LOC727738    | Similar to Amphiregulin precursor (AR) (Colorectum cell-derived growth factor) (CRDGF) | -0.2982 | 0.0059 |
| 1557286_at   |              | CDNA FLJ10145 fis; clone HEMBA1003322                                                  | -1.0844 | 0      |
| 1557287_at   |              | CDNA clone IMAGE:4837072                                                               | -0.1437 | 0.005  |
| 1557295_a_at |              | CDNA FLJ25198 fis; clone REC04733                                                      | -0.1099 | 0.0076 |
| 1557334_a_at | C20orf42     | chromosome 20 open reading frame 42                                                    | -0.1243 | 0.0117 |
| 1557338_x_at |              | Homo sapiens; clone IMAGE:5396883; mRNA                                                | -0.1553 | 0.0434 |
| 1557341_x_at |              | Homo sapiens; clone IMAGE:5190399; mRNA                                                | -0.1428 | 0.0109 |
| 1557349_at   | RERE         | arginine-glutamic acid dipeptide (RE) repeats                                          | -0.1773 | 0.0195 |
| 1557353_at   |              | CDNA FLJ38904 fis; clone NT2NE2001524                                                  | -0.7077 | 0.0191 |
| 1557400_at   |              | CDNA FLJ38935 fis; clone NT2NE2014681                                                  | -0.4532 | 0.0007 |
| 1557404_at   |              | CDNA clone IMAGE:5266464                                                               | -0.1235 | 0.0192 |
| 1557448_a_at |              | CDNA clone IMAGE:5298376                                                               | -0.1131 | 0.0226 |
| 1557457_at   |              | FLJ00054 protein                                                                       | -0.5459 | 0.0002 |
| 1557459_at   |              | MRNA; cDNA DKFZp547O0210 (from clone DKFZp547O0210)                                    | -1.0714 | 0.016  |
| 1557475_at   |              | CDNA clone IMAGE:5274197                                                               | -0.1036 | 0.0062 |
| 1557515_at   |              | Full length insert cDNA clone YA81F02                                                  | -0.1073 | 0.0184 |
| 1557532_at   | NDUFA7       | NADH dehydrogenase (ubiquinone) 1 alpha subcomplex; 7; 14.5kDa                         | -0.2226 | 0.0161 |
| 1557535_at   | PALLD        | Palladin; cytoskeletal associated protein                                              | -0.1304 | 0.0397 |
| 1557553_at   | PPP1R12B     | Protein phosphatase 1; regulatory (inhibitor) subunit 12B                              | -0.223  | 0.0292 |
| 1557578_at   | PHLDB2       | Pleckstrin homology-like domain; family B; member 2                                    | -1.4121 | 0.0004 |
| 1557601_s_at | KIAA1257     | KIAA1257                                                                               | -0.1181 | 0.0139 |
| 1557613_at   | FLJ39534     | hypothetical protein FLJ39534                                                          | -0.2256 | 0.0004 |
| 1557624_at   |              | CDNA FLJ34224 fis; clone FCBBF3023078                                                  | -0.4678 | 0.0016 |
| 1557628_s_at | LOC283745    | hypothetical protein LOC283745                                                         | -0.1009 | 0.0327 |
| 1557658_at   |              | CDNA FLJ33670 fis; clone BRAMY2028783                                                  | -0.1783 | 0.035  |
| 1557665_at   |              | CDNA FLJ11096 fis; clone PLACE1005480                                                  | -0.239  | 0.0004 |
| 1557669_at   |              | CDNA FLJ35343 fis; clone PROST2015932                                                  | -0.2248 | 0.0046 |

|              |           |                                                                                                                     |         |        |
|--------------|-----------|---------------------------------------------------------------------------------------------------------------------|---------|--------|
| 1557672_s_at |           | CDNA clone IMAGE:5297153                                                                                            | -0.2022 | 0.0123 |
| 1557679_at   | C8orf68   | chromosome 8 open reading frame 68                                                                                  | -0.1826 | 0.0022 |
| 1557693_at   |           | CDNA clone IMAGE:5303580                                                                                            | -0.1374 | 0.0478 |
| 1557702_at   |           | CDNA clone IMAGE:5265308                                                                                            | -0.1683 | 0.0154 |
| 1557706_at   | ZHX2      | zinc fingers and homeoboxes 2                                                                                       | -0.8972 | 0.0001 |
| 1557713_at   |           | MRNA; cDNA DKFZp686H1927 (from clone DKFZp686H1927)                                                                 | -0.1404 | 0.0082 |
| 1557723_at   | LOC285847 | hypothetical protein LOC285847                                                                                      | -0.124  | 0.0329 |
| 1557731_at   | LOC400620 | hypothetical gene supported by BC035399                                                                             | -0.1416 | 0.0452 |
| 1557753_at   |           | CDNA clone IMAGE:5265890                                                                                            | -0.1319 | 0.0041 |
| 1557761_s_at | LOC400794 | hypothetical gene supported by BC030596                                                                             | -0.1823 | 0.0345 |
| 1557774_at   |           | Homo sapiens; clone IMAGE:4498937; mRNA                                                                             | -0.1406 | 0.007  |
| 1557790_at   |           | CDNA clone IMAGE:5273123                                                                                            | -0.1912 | 0.004  |
| 1557791_at   |           | CDNA clone IMAGE:5303925                                                                                            | -0.1155 | 0.0131 |
| 1557795_s_at | NTRK3     | neurotrophic tyrosine kinase; receptor; type 3                                                                      | -0.1322 | 0.0076 |
| 1557797_a_at |           | MRNA; cDNA DKFZp566D053 (from clone DKFZp566D053)                                                                   | -0.529  | 0.0027 |
| 1557807_a_at |           | Full length insert cDNA clone ZB77E08                                                                               | -0.1982 | 0.0167 |
| 1557832_at   |           | CDNA FLJ20833 fis; clone ADKA02957                                                                                  | -0.3673 | 0.0035 |
| 1557848_at   |           | CDNA clone IMAGE:5272084                                                                                            | -0.1546 | 0.0137 |
| 1557852_at   |           | CDNA FLJ31245 fis; clone KIDNE2005062                                                                               | -0.7207 | 0.0166 |
| 1557865_at   |           | CDNA clone IMAGE:5299063                                                                                            | -0.1115 | 0.0232 |
| 1557867_s_at | C9orf117  | chromosome 9 open reading frame 117                                                                                 | -0.2018 | 0.0342 |
| 1557892_at   |           | CDNA clone IMAGE:5266893                                                                                            | -0.1218 | 0.0267 |
| 1557897_at   | CCDC85A   | Coiled-coil domain containing 85A                                                                                   | -0.1836 | 0.0084 |
| 1557898_at   |           | CDNA clone IMAGE:5297808                                                                                            | -0.1512 | 0.0106 |
| 1557907_x_at | MUC12     | mucin 12; cell surface associated                                                                                   | -0.1146 | 0.0076 |
| 1557919_a_at | LOC648232 | Hypothetical protein LOC648232                                                                                      | -0.1284 | 0.0015 |
| 1557921_s_at |           | Homo sapiens; clone IMAGE:4447022; mRNA                                                                             | -1.8013 | 0      |
| 1557943_at   | CNP       | 2';3'-cyclic nucleotide 3' phosphodiesterase                                                                        | -0.4876 | 0      |
| 1557948_at   | LOC653583 | pleckstrin homology-like domain; family B; member 3, similar to pleckstrin homology-like domain; family B; member 1 | -1.6005 | 0      |
| 1557964_at   | EIF4G2    | eukaryotic translation initiation factor 4 gamma; 2                                                                 | -0.1554 | 0.0032 |
| 1557994_at   | TTN       | titin                                                                                                               | -0.2444 | 0.0157 |
| 1558009_at   | SLC1A2    | solute carrier family 1 (glial high affinity glutamate transporter); member 2                                       | -0.1688 | 0.0047 |
| 1558010_s_at | SLC1A2    | solute carrier family 1 (glial high affinity glutamate transporter); member 2                                       | -0.248  | 0.0152 |

|              |           |                                                                                                                                          |         |        |
|--------------|-----------|------------------------------------------------------------------------------------------------------------------------------------------|---------|--------|
| 1558066_s_at | TBC1D16   | TBC1 domain family; member 16                                                                                                            | -0.1163 | 0.026  |
| 1558101_at   |           |                                                                                                                                          | -0.4534 | 0.0097 |
| 1558102_at   |           | CDNA FLJ30876 fis; clone FEBRA2004412                                                                                                    | -0.695  | 0.0075 |
| 1558121_at   |           | CDNA FLJ39178 fis; clone OCBBF2004104                                                                                                    | -0.153  | 0.0335 |
| 1558142_at   | TNRC6B    | trinucleotide repeat containing 6B                                                                                                       | -0.7672 | 0.0213 |
| 1558166_at   | MGC16275  | hypothetical protein MGC16275                                                                                                            | -0.4868 | 0      |
| 1558167_a_at | MGC16275  | hypothetical protein MGC16275                                                                                                            | -0.4654 | 0      |
| 1558168_at   | C3orf47   | chromosome 3 open reading frame 47                                                                                                       | -0.1516 | 0.0269 |
| 1558211_s_at | SRC       | v-src sarcoma (Schmidt-Ruppin A-2) viral oncogene homolog (avian)                                                                        | -0.2616 | 0.0001 |
| 1558212_at   | FLJ35024  | hypothetical LOC401491                                                                                                                   | -0.3565 | 0.0003 |
| 1558225_at   |           | CDNA clone IMAGE:5303125                                                                                                                 | -0.1372 | 0.0042 |
| 1558238_at   | TNRC18    | trinucleotide repeat containing 18                                                                                                       | -0.1348 | 0.0133 |
| 1558289_at   | LOC285398 | RFT1 homolog (S. cerevisiae), hypothetical locus LOC285398                                                                               | -0.1578 | 0.0054 |
| 1558295_a_at | PPFIA2    | protein tyrosine phosphatase; receptor type; f polypeptide (PTPRF); interacting protein (liprin); alpha 2                                | -0.1718 | 0.0082 |
| 1558300_at   | EFCAB5    | EF-hand calcium binding domain 5                                                                                                         | -0.1933 | 0.0051 |
| 1558333_at   | C22orf15  | chromosome 22 open reading frame 15                                                                                                      | -0.1617 | 0.0012 |
| 1558343_at   |           | Full length insert cDNA clone Y154B09                                                                                                    | -0.1306 | 0.0252 |
| 1558345_a_at | LOC439911 | hypothetical gene supported by NM_194304                                                                                                 | -1.7593 | 0      |
| 1558387_at   |           | CDNA clone IMAGE:4817707                                                                                                                 | -0.5422 | 0.0349 |
| 1558388_a_at |           | CDNA clone IMAGE:4817707                                                                                                                 | -1.3504 | 0.025  |
| 1558400_x_at | ANKRD24   | ankyrin repeat domain 24                                                                                                                 | -0.1172 | 0.0122 |
| 1558420_at   | LOC400258 | similar to RIKEN cDNA A530016L24 gene                                                                                                    | -0.2865 | 0      |
| 1558421_a_at | LOC400258 | similar to RIKEN cDNA A530016L24 gene                                                                                                    | -0.4479 | 0      |
| 1558437_at   |           | Epsilon ; IgE=membrane-bound IgE; epsilon m/s isoform {alternative splicing} [human; mRNA Partial; 216 nt], Immunoglobulin epsilon chain | -0.1599 | 0.0059 |
| 1558487_a_at | TMED4     | transmembrane emp24 protein transport domain containing 4                                                                                | -1.6983 | 0.0002 |
| 1558507_at   | C1orf53   | chromosome 1 open reading frame 53                                                                                                       | -0.4263 | 0.0377 |
| 1558508_a_at | C1orf53   | chromosome 1 open reading frame 53                                                                                                       | -1.5339 | 0.0038 |
| 1558546_at   | DNASE1    | deoxyribonuclease I                                                                                                                      | -0.1181 | 0.0336 |
| 1558574_at   |           | CDNA clone IMAGE:6049242                                                                                                                 | -0.1136 | 0.0349 |
| 1558584_at   | UBL4B     | ubiquitin-like 4B                                                                                                                        | -0.2    | 0.0027 |
| 1558586_at   | ZNF33B    | zinc finger protein 33B                                                                                                                  | -0.3866 | 0.0087 |
| 1558590_at   | LOC731602 | methyltransferase 11 domain containing 1, similar to methyltransferase 11 domain containing 1 isoform 2                                  | -0.173  | 0.0064 |

|              |           |                                                                |         |        |
|--------------|-----------|----------------------------------------------------------------|---------|--------|
| 1558594_at   | C14orf176 | Chromosome 14 open reading frame 176                           | -0.1679 | 0.0314 |
| 1558643_s_at | EDIL3     | EGF-like repeats and discoidin I-like domains 3                | -0.2638 | 0.0074 |
| 1558647_at   | SH3D19    | SH3 domain protein D19                                         | -0.1658 | 0.0338 |
| 1558661_at   |           | Homo sapiens; clone IMAGE:5539086; mRNA                        | -0.1188 | 0.0077 |
| 1558682_at   | HMGA2     | high mobility group AT-hook 2                                  | -0.2107 | 0.0011 |
| 1558687_a_at |           | Full length insert cDNA clone ZD83D05                          | -0.1399 | 0.0198 |
| 1558689_a_at | LOC441461 | hypothetical gene supported by BC030123                        | -0.2642 | 0.0285 |
| 1558703_at   | SLC46A1   | solute carrier family 46; member 1                             | -1.6878 | 0      |
| 1558743_at   | ZNF620    | zinc finger protein 620                                        | -0.1127 | 0.0267 |
| 1558760_at   |           | Homo sapiens; clone IMAGE:5243718; mRNA                        | -0.1706 | 0.0156 |
| 1558769_s_at | DNAH1     | dynein; axonemal; heavy chain 1                                | -0.1121 | 0.0201 |
| 1558795_at   | LOC728052 | Hypothetical protein LOC728052                                 | -0.2529 | 0.0209 |
| 1558796_a_at | LOC728052 | hypothetical protein LOC728052                                 | -0.3177 | 0.0154 |
| 1558804_at   |           | CDNA clone IMAGE:5263963                                       | -0.2499 | 0.0159 |
| 1558815_at   | SORBS2    | sorbin and SH3 domain containing 2                             | -1.9669 | 0.0006 |
| 1558827_a_at | C20orf174 | chromosome 20 open reading frame 174                           | -0.1369 | 0.0247 |
| 1558834_s_at | C1orf62   | chromosome 1 open reading frame 62                             | -0.1305 | 0.0474 |
| 1558847_at   |           | CDNA FLJ34734 fis; clone MESAN2006971                          | -0.1597 | 0.0118 |
| 1558852_at   |           | CDNA FLJ31186 fis; clone KIDNE2000335                          | -0.1071 | 0.0298 |
| 1558868_a_at | DSE       | Dermatan sulfate epimerase                                     | -0.1104 | 0.023  |
| 1558875_at   | SREBF1    | sterol regulatory element binding transcription factor 1       | -0.4111 | 0      |
| 1558881_at   | LOC145820 | hypothetical protein LOC145820                                 | -2.3211 | 0      |
| 1558894_a_at | CCDC67    | coiled-coil domain containing 67                               | -0.139  | 0.0163 |
| 1558915_a_at | PEX14     | peroxisomal biogenesis factor 14                               | -0.2146 | 0.0079 |
| 1558944_at   | CACNA1A   | Calcium channel; voltage-dependent; P/Q type; alpha 1A subunit | -0.2132 | 0.0041 |
| 1558947_at   |           | Full length insert cDNA clone ZD90B10                          | -0.1258 | 0.0142 |
| 1558950_at   |           | Homo sapiens; clone IMAGE:4647355; mRNA                        | -0.1154 | 0.0121 |
| 1558954_at   | SNORA78   | small nucleolar RNA; H/ACA box 78                              | -0.1392 | 0.0048 |
| 1558960_a_at |           | CDNA FLJ34838 fis; clone NT2NE2010654                          | -0.1383 | 0.0048 |
| 1558984_at   | MAP3K11   | mitogen-activated protein kinase kinase kinase 11              | -0.1257 | 0.0241 |
| 1559017_at   |           | CDNA FLJ38915 fis; clone NT2NE2008867                          | -0.1572 | 0.0029 |
| 1559029_at   | LOC286154 | Hypothetical protein LOC286154                                 | -0.1062 | 0.0419 |
| 1559034_at   | SIRPB2    | signal-regulatory protein beta 2                               | -0.4144 | 0.0007 |
| 1559057_at   | CXorf45   | chromosome X open reading frame 45                             | -0.2389 | 0.0154 |
| 1559061_at   | LOC253962 | hypothetical protein LOC253962                                 | -0.1992 | 0.0149 |

|              |           |                                                                         |         |        |
|--------------|-----------|-------------------------------------------------------------------------|---------|--------|
| 1559066_at   |           | Transcribed locus                                                       | -0.1078 | 0.038  |
| 1559067_a_at |           | Transcribed locus                                                       | -0.6582 | 0.0132 |
| 1559091_s_at | FGD2      | FYVE; RhoGEF and PH domain containing 2                                 | -0.2258 | 0      |
| 1559131_a_at |           | Homo sapiens; clone IMAGE:5189615; mRNA                                 | -0.1801 | 0.0334 |
| 1559138_a_at | SPATA19   | spermatogenesis associated 19                                           | -0.1008 | 0.0214 |
| 1559140_at   | FAM87A    | family with sequence similarity 87; member A                            | -0.2828 | 0.039  |
| 1559166_at   |           | CDNA FLJ38526 fis; clone HCHON2000898                                   | -0.1626 | 0.0059 |
| 1559195_at   |           | CDNA clone IMAGE:5302711                                                | -0.1065 | 0.0319 |
| 1559218_s_at | NFYC      | nuclear transcription factor Y; gamma                                   | -0.3003 | 0.0039 |
| 1559232_a_at |           | Homo sapiens; clone IMAGE:4732808; mRNA                                 | -1.2348 | 0.0005 |
| 1559239_s_at | ACAT1     | Acetyl-Coenzyme A acetyltransferase 1 (acetoacetyl Coenzyme A thiolase) | -0.3113 | 0.006  |
| 1559245_at   |           | Clone IMAGE:121018 mRNA sequence                                        | -0.1524 | 0.0322 |
| 1559254_at   | C21orf113 | chromosome 21 open reading frame 113                                    | -0.1189 | 0.034  |
| 1559272_at   | EXOC3L    | exocyst complex component 3-like                                        | -0.1626 | 0.0132 |
| 1559277_at   | FLJ35700  | hypothetical protein FLJ35700                                           | -0.2919 | 0.0006 |
| 1559321_at   |           | Homo sapiens; clone IMAGE:5528576; mRNA                                 | -0.1785 | 0.0047 |
| 1559351_at   |           | CDNA clone IMAGE:5314400                                                | -1.9522 | 0      |
| 1559362_at   |           | CDNA clone IMAGE:5302421                                                | -0.265  | 0.0155 |
| 1559376_at   | C1orf203  | chromosome 1 open reading frame 203                                     | -0.1534 | 0.0061 |
| 1559392_s_at | SYT7      | synaptotagmin VII                                                       | -0.116  | 0.0489 |
| 1559393_at   | ALDH1L2   | aldehyde dehydrogenase 1 family; member L2                              | -0.1586 | 0.0037 |
| 1559402_a_at | C1orf61   | chromosome 1 open reading frame 61                                      | -0.2221 | 0.0001 |
| 1559409_a_at | KIAA1345  | KIAA1345 protein                                                        | -0.1238 | 0.0361 |
| 1559412_at   | C21orf34  | chromosome 21 open reading frame 34                                     | -0.2464 | 0.0038 |
| 1559432_at   | CCBP2     | chemokine binding protein 2                                             | -0.1604 | 0.0003 |
| 1559478_at   |           | CDNA clone IMAGE:5270289                                                | -0.1223 | 0.02   |
| 1559526_at   |           | CDNA clone IMAGE:5285563                                                | -0.2286 | 0      |
| 1559537_at   |           | Homo sapiens; clone IMAGE:4184655; mRNA                                 | -0.1793 | 0.0188 |
| 1559559_at   | C9orf79   | chromosome 9 open reading frame 79                                      | -0.132  | 0.0073 |
| 1559571_a_at | ATP13A4   | ATPase type 13A4                                                        | -0.1565 | 0.0053 |
| 1559582_at   | RHOQ      | ras homolog gene family; member Q                                       | -0.7721 | 0.0341 |
| 1559590_at   | CHDH      | choline dehydrogenase                                                   | -0.1269 | 0.0034 |
| 1559591_s_at | CHDH      | choline dehydrogenase                                                   | -0.1662 | 0.014  |
| 1559624_at   | STK32A    | serine/threonine kinase 32A                                             | -0.1366 | 0.0114 |
| 1559635_at   | CASC4     | cancer susceptibility candidate 4                                       | -0.1223 | 0.0399 |

|              |          |                                                                  |         |        |
|--------------|----------|------------------------------------------------------------------|---------|--------|
| 1559645_at   |          | Non-coding RNA HANC                                              | -0.2254 | 0.0168 |
| 1559655_at   |          | CDNA FLJ42132 fis; clone TESTI2034997                            | -0.153  | 0.0281 |
| 1559661_at   | ODZ3     | odz; odd Oz/ten-m homolog 3 (Drosophila)                         | -0.1042 | 0.0234 |
| 1559664_at   |          | CDNA clone IMAGE:4824541                                         | -0.1431 | 0.047  |
| 1559676_a_at |          |                                                                  | -0.1321 | 0.0029 |
| 1559683_at   |          | Full length insert cDNA clone YU75B05                            | -0.202  | 0.0037 |
| 1559692_at   |          |                                                                  | -0.1121 | 0.0338 |
| 1559695_a_at |          | Full length insert cDNA clone ZC64D07                            | -0.193  | 0.0101 |
| 1559701_s_at | NDST2    | N-deacetylase/N-sulfotransferase (heparan glucosaminy) 2         | -0.4511 | 0.0001 |
| 1559715_at   |          | CDNA clone IMAGE:4822667                                         | -0.1193 | 0.0251 |
| 1559739_at   | CHPT1    | Choline phosphotransferase 1                                     | -0.976  | 0.032  |
| 1559745_at   |          | CDNA FLJ34261 fis; clone FEBRA2001772                            | -0.1324 | 0.0093 |
| 1559748_at   | ADAMTSL3 | ADAMTS-like 3                                                    | -0.2358 | 0.0003 |
| 1559753_at   |          | CDNA FLJ36163 fis; clone TESTI2026014                            | -0.149  | 0.0069 |
| 1559777_at   |          | CDNA FLJ32866 fis; clone TESTI2003718                            | -0.1    | 0.0493 |
| 1559785_at   | TPPP2    | tubulin polymerization-promoting protein family member 2         | -0.1578 | 0.0059 |
| 1559901_s_at | C21orf34 | chromosome 21 open reading frame 34                              | -0.9096 | 0      |
| 1559909_a_at | TIMM17B  | translocase of inner mitochondrial membrane 17 homolog B (yeast) | -0.1282 | 0.0085 |
| 1559910_at   |          | MRNA full length insert cDNA clone EUROIMAGE 85905               | -1.347  | 0.0025 |
| 1559915_at   |          | Homo sapiens; clone IMAGE:4723617; mRNA                          | -0.197  | 0.0064 |
| 1559917_a_at |          | CDNA clone IMAGE:5262521                                         | -0.1657 | 0.0035 |
| 1559924_at   |          | CDNA clone IMAGE:5303182                                         | -0.1853 | 0.0355 |
| 1559942_at   | MDFIC    | MyoD family inhibitor domain containing                          | -0.7596 | 0.0001 |
| 1559948_at   |          | CDNA FLJ20447 fis; clone KAT05276                                | -0.1901 | 0.0479 |
| 1559960_x_at |          | Homo sapiens; clone IMAGE:5728979; mRNA                          | -0.331  | 0.0078 |
| 1559977_a_at | SLC25A34 | solute carrier family 25; member 34                              | -1.1521 | 0      |
| 1559991_s_at |          |                                                                  | -0.1644 | 0.0417 |
| 1560024_at   |          | CDNA clone IMAGE:4825318                                         | -0.1139 | 0.039  |
| 1560059_at   | VPS37C   | vacuolar protein sorting 37 homolog C (S. cerevisiae)            | -0.2686 | 0.0004 |
| 1560074_at   | PRKCA    | protein kinase C; alpha                                          | -0.1506 | 0.0216 |
| 1560115_a_at | KIAA1217 | KIAA1217                                                         | -0.1796 | 0.0232 |
| 1560132_a_at |          | Homo sapiens; clone IMAGE:5750475; mRNA                          | -0.3    | 0.0001 |
| 1560149_at   | SLC29A2  | solute carrier family 29 (nucleoside transporters); member 2     | -0.1957 | 0.0242 |
| 1560151_x_at | SLC29A2  | solute carrier family 29 (nucleoside transporters); member 2     | -0.1322 | 0.0321 |
| 1560187_at   |          | Homo sapiens; clone IMAGE:5767628; mRNA                          | -0.1398 | 0.0476 |

|              |           |                                                                                                        |         |        |
|--------------|-----------|--------------------------------------------------------------------------------------------------------|---------|--------|
| 1560199_x_at | FLJ11903  | similar to hypothetical protein MGC40405                                                               | -0.9952 | 0.0017 |
| 1560208_at   |           |                                                                                                        | -0.1057 | 0.0284 |
| 1560219_at   | ASB3      | Ankyrin repeat and SOCS box-containing 3                                                               | -0.1403 | 0.0149 |
| 1560220_a_at | CBY1      | chibby homolog 1 (Drosophila)                                                                          | -0.1095 | 0.0238 |
| 1560240_at   |           | CDNA clone IMAGE:5418341                                                                               | -0.1193 | 0.0191 |
| 1560253_at   | LHX9      | LIM homeobox 9                                                                                         | -0.1349 | 0.0306 |
| 1560277_a_at | LOC283403 | hypothetical protein LOC283403                                                                         | -0.1422 | 0.0192 |
| 1560278_at   | LOC221122 | hypothetical protein LOC221122                                                                         | -0.1656 | 0.0147 |
| 1560285_at   |           | Homo sapiens; clone IMAGE:3446976; mRNA                                                                | -0.1164 | 0.0156 |
| 1560322_at   | RBMS3     | RNA binding motif, single stranded interacting protein                                                 | -0.1609 | 0.0173 |
| 1560378_at   | C21orf41  | Chromosome 21 open reading frame 41                                                                    | -0.1526 | 0.0193 |
| 1560402_at   | GAS5      | growth arrest-specific 5                                                                               | -0.4417 | 0.0002 |
| 1560409_at   |           | Homo sapiens; clone IMAGE:5211852; mRNA                                                                | -0.1096 | 0.0284 |
| 1560424_at   |           | CDNA FLJ40944 fis; clone UTERU2008705                                                                  | -0.2259 | 0.0213 |
| 1560435_at   |           | CDNA FLJ36444 fis; clone THYMU2012902                                                                  | -0.1219 | 0.031  |
| 1560472_at   | LOC338588 | hypothetical protein LOC338588                                                                         | -0.1397 | 0.0093 |
| 1560477_a_at | SAMD11    | sterile alpha motif domain containing 11                                                               | -0.2346 | 0.0014 |
| 1560488_at   | FLJ45224  | FLJ45224 protein                                                                                       | -0.191  | 0.0027 |
| 1560513_at   | LOC400568 | hypothetical LOC400568                                                                                 | -0.1485 | 0.0187 |
| 1560548_at   |           | CDNA clone IMAGE:4825993                                                                               | -0.1167 | 0.0139 |
| 1560550_at   |           | Homo sapiens; clone IMAGE:5180210; mRNA                                                                | -0.1017 | 0.0405 |
| 1560560_at   |           | Homo sapiens; clone IMAGE:3608699; mRNA                                                                | -0.3822 | 0      |
| 1560573_at   | LOC387895 | hypothetical gene supported by BC040060                                                                | -0.2659 | 0.0006 |
| 1560577_at   |           | CDNA clone IMAGE:4827370                                                                               | -0.2226 | 0.0233 |
| 1560582_a_at |           | Homo sapiens; clone IMAGE:5741868; mRNA                                                                | -0.1992 | 0.0059 |
| 1560619_at   | LOC255411 | hypothetical LOC255411                                                                                 | -0.1556 | 0.0012 |
| 1560634_a_at |           | CDNA clone IMAGE:4837645                                                                               | -0.1195 | 0.0096 |
| 1560639_at   |           | Homo sapiens; clone IMAGE:3935553                                                                      | -0.126  | 0.0183 |
| 1560647_at   | TSPYL1    | TSPY-like 1                                                                                            | -0.2182 | 0.0021 |
| 1560648_s_at | TSPYL1    | TSPY-like 1                                                                                            | -1.2085 | 0      |
| 1560652_at   |           | MRNA; cDNA DKFZp686L0310 (from clone DKFZp686L0310)                                                    | -0.1075 | 0.0351 |
| 1560671_at   | KIAA1652  | KIAA1652 protein                                                                                       | -0.2372 | 0.0003 |
| 1560705_at   | SLC25A28  | Solute carrier family 25; member 28                                                                    | -0.1278 | 0.0166 |
| 1560724_at   |           | CDNA FLJ33564 fis; clone BRAMY2010135                                                                  | -0.1927 | 0.0089 |
| 1560733_at   | ALG5      | Asparagine-linked glycosylation 5 homolog (S. cerevisiae; dolichyl-phosphate beta-glucosyltransferase) | -0.1722 | 0.003  |



|              |            |                                                                |         |        |
|--------------|------------|----------------------------------------------------------------|---------|--------|
| 1560762_at   | LOC285972  | hypothetical protein LOC285972                                 | -0.1446 | 0.0171 |
| 1560765_a_at | ARHGAP22   | Rho GTPase activating protein 22                               | -0.1468 | 0.0106 |
| 1560818_at   | LOC387895  | Hypothetical gene supported by BC040060                        | -0.1532 | 0.0435 |
| 1560830_a_at | LOC147646  | hypothetical protein LOC147646                                 | -0.2481 | 0.031  |
| 1560832_at   |            | Homo sapiens; clone IMAGE:4063532; mRNA                        | -0.1003 | 0.011  |
| 1560836_at   |            | Homo sapiens; clone IMAGE:5171361; mRNA                        | -0.1374 | 0.0013 |
| 1560844_at   |            | Homo sapiens; clone IMAGE:5742838; mRNA                        | -0.1444 | 0.0051 |
| 1560856_at   |            | Homo sapiens; clone IMAGE:5742065; mRNA                        | -0.1722 | 0.004  |
| 1560862_at   |            | MRNA; cDNA DKFZp434I235 (from clone DKFZp434I235)              | -0.1096 | 0.0378 |
| 1560863_a_at |            | Full length insert cDNA clone ZA92B11                          | -0.1085 | 0.0239 |
| 1560878_at   | SYT15      | synaptotagmin XV                                               | -0.2035 | 0.0323 |
| 1560891_a_at |            | Full length insert cDNA clone YY75G10                          | -0.1132 | 0.0342 |
| 1560897_a_at | KRTAP10-11 | keratin associated protein 10-11                               | -0.1731 | 0.0191 |
| 1560901_at   | LOC728789  | hypothetical protein LOC728789, hypothetical protein LOC728905 | -0.1305 | 0.008  |
| 1560940_at   |            | CDNA FLJ32834 fis; clone TESTI2003236                          | -0.1747 | 0.0251 |
| 1560957_at   |            | CDNA clone IMAGE:5268125                                       | -0.1428 | 0.0051 |
| 1560960_at   |            | Full length insert cDNA clone YX25D06                          | -0.1812 | 0.0003 |
| 1560962_at   |            | Full length insert cDNA clone YI41H11                          | -0.1795 | 0.0038 |
| 1560964_at   |            | Full length insert cDNA clone ZE16D09                          | -0.131  | 0.0075 |
| 1560971_a_at |            | Full length insert cDNA YQ76C04                                | -0.1534 | 0.0175 |
| 1560978_at   |            | Full length insert cDNA clone ZD58F01                          | -0.1449 | 0.0489 |
| 1560989_at   |            | Full length insert cDNA clone YY93H10                          | -0.1299 | 0.0167 |
| 1561000_at   |            | MRNA; cDNA DKFZp667A015 (from clone DKFZp667A015)              | -0.183  | 0.0028 |
| 1561003_at   |            | Full length insert cDNA clone YY79F12                          | -0.15   | 0.0032 |
| 1561019_at   |            | Full length insert cDNA clone ZD95A07                          | -0.1158 | 0.0336 |
| 1561034_at   |            | CDNA clone IMAGE:5285971                                       | -0.1408 | 0.0019 |
| 1561041_at   |            | Homo sapiens; clone IMAGE:5534210; mRNA                        | -0.2292 | 0.0014 |
| 1561044_at   |            | Homo sapiens; clone IMAGE:5548255; mRNA                        | -0.4058 | 0.005  |
| 1561045_a_at |            | Homo sapiens; clone IMAGE:5548255; mRNA                        | -0.147  | 0.007  |
| 1561060_at   |            | CDNA clone IMAGE:5298862                                       | -0.133  | 0.0119 |
| 1561064_a_at |            | CDNA clone IMAGE:3885734                                       | -0.1118 | 0.0282 |
| 1561076_at   |            | CDNA clone IMAGE:5267701                                       | -0.1096 | 0.0238 |
| 1561078_at   |            | CDNA clone IMAGE:4828251                                       | -0.1817 | 0.0044 |
| 1561083_at   |            | CDNA clone IMAGE:4827605                                       | -0.102  | 0.0284 |
| 1561100_at   |            | CDNA clone IMAGE:5269545                                       | -0.1152 | 0.0273 |

|              |               |                                                                                                                                                                     |         |        |
|--------------|---------------|---------------------------------------------------------------------------------------------------------------------------------------------------------------------|---------|--------|
| 1561102_at   |               | CDNA clone IMAGE:5267652                                                                                                                                            | -0.1924 | 0.0032 |
| 1561103_at   |               | CDNA clone IMAGE:5264111                                                                                                                                            | -0.1914 | 0.0043 |
| 1561106_at   | C6orf217      | chromosome 6 open reading frame 217                                                                                                                                 | -0.391  | 0      |
| 1561133_at   |               | Full length insert cDNA clone ZD60A10                                                                                                                               | -0.1773 | 0.0176 |
| 1561153_at   |               | Full length insert cDNA YP99H09                                                                                                                                     | -0.4638 | 0.0094 |
| 1561169_at   | LOC727818     | similar to PRP38 pre-mRNA processing factor 38 (yeast) domain containing B                                                                                          | -0.2333 | 0.0001 |
| 1561171_a_at | FLJ36131      | FLJ40198 protein, hypothetical protein FLJ36131, similar to Golgin subfamily A member 2 (Cis-Golgi matrix protein GM130), similar to cis-Golgi matrix protein GM130 | -0.2094 | 0.0238 |
| 1561185_at   | CLONE795723   | hypothetical transcript 795723                                                                                                                                      | -0.2768 | 0.0081 |
| 1561202_at   |               | CDNA clone IMAGE:4830882                                                                                                                                            | -0.1183 | 0.0257 |
| 1561211_at   |               | CDNA clone IMAGE:5265906                                                                                                                                            | -0.1315 | 0.0127 |
| 1561214_at   |               | CDNA clone IMAGE:5271518                                                                                                                                            | -0.2095 | 0.0038 |
| 1561228_at   |               | CDNA clone IMAGE:5267471                                                                                                                                            | -0.177  | 0.039  |
| 1561243_at   | TMEM105       | transmembrane protein 105                                                                                                                                           | -0.1461 | 0.0167 |
| 1561256_at   |               | CDNA clone IMAGE:5272683                                                                                                                                            | -0.1338 | 0.0226 |
| 1561277_at   | LOC339298     | hypothetical protein LOC339298                                                                                                                                      | -0.1239 | 0.0072 |
| 1561279_at   |               | CDNA clone IMAGE:4821609                                                                                                                                            | -0.1365 | 0.0246 |
| 1561288_at   |               | CDNA clone IMAGE:4838258                                                                                                                                            | -0.1408 | 0.012  |
| 1561304_a_at | C6orf86       | chromosome 6 open reading frame 86                                                                                                                                  | -0.1927 | 0.0028 |
| 1561327_at   | C6orf122      | chromosome 6 open reading frame 122                                                                                                                                 | -0.1535 | 0.0001 |
| 1561336_at   | DNASE1L3      | deoxyribonuclease I-like 3                                                                                                                                          | -0.504  | 0      |
| 1561352_at   |               | Homo sapiens; clone IMAGE:5528391; mRNA                                                                                                                             | -0.1094 | 0.0302 |
| 1561355_at   | LOC692247     | hypothetical locus LOC692247                                                                                                                                        | -0.3598 | 0.0024 |
| 1561383_at   | LOC284661     | hypothetical protein LOC284661                                                                                                                                      | -0.1521 | 0.0083 |
| 1561384_a_at | LOC284661     | hypothetical protein LOC284661                                                                                                                                      | -0.1603 | 0.0172 |
| 1561387_a_at | FAM55A        | family with sequence similarity 55; member A                                                                                                                        | -0.1012 | 0.0332 |
| 1561390_at   | FAM41AY       | family with sequence similarity 41; member A; Y-linked                                                                                                              | -0.1862 | 0.0082 |
| 1561394_s_at | RP5-1054A22.3 | KIAA1755 protein                                                                                                                                                    | -0.2094 | 0.0001 |
| 1561409_at   |               | CDNA FLJ40393 fis; clone TESTI2036922                                                                                                                               | -0.1151 | 0.0356 |
| 1561418_at   |               | Homo sapiens; clone IMAGE:5403381; mRNA                                                                                                                             | -0.1587 | 0.0004 |
| 1561431_at   |               | CDNA clone IMAGE:5259382                                                                                                                                            | -0.1046 | 0.0348 |
| 1561446_at   |               | CDNA clone IMAGE:4829179                                                                                                                                            | -0.2683 | 0.003  |
| 1561449_at   | TSPAN18       | tetraspanin 18                                                                                                                                                      | -0.1219 | 0.0429 |
| 1561452_at   |               | CDNA FLJ35945 fis; clone TESTI2011915                                                                                                                               | -0.1392 | 0.0029 |
| 1561462_at   |               | CDNA FLJ36107 fis; clone TESTI2021819                                                                                                                               | -0.1237 | 0.0233 |
| 1561463_at   |               |                                                                                                                                                                     | -0.1761 | 0.0222 |

|              |           |                                                                                                 |         |        |
|--------------|-----------|-------------------------------------------------------------------------------------------------|---------|--------|
| 1561471_at   | LOC441009 | Hypothetical LOC441009                                                                          | -0.1171 | 0.0056 |
| 1561481_at   |           | CDNA clone IMAGE:4827393                                                                        | -0.1238 | 0.0154 |
| 1561502_x_at | LOC348180 | Hypothetical protein LOC348180                                                                  | -0.2663 | 0.0087 |
| 1561537_at   | LOC388906 | hypothetical gene supported by BC039496                                                         | -0.1226 | 0.0333 |
| 1561538_at   |           | CDNA clone IMAGE:5271875                                                                        | -0.179  | 0.0061 |
| 1561539_at   |           | CDNA clone IMAGE:5303543                                                                        | -0.2032 | 0.0052 |
| 1561543_at   |           | CDNA clone IMAGE:5299981                                                                        | -0.1567 | 0.0288 |
| 1561546_at   |           | CDNA clone IMAGE:4827685                                                                        | -0.1511 | 0.0087 |
| 1561554_at   |           | CDNA clone IMAGE:4813826                                                                        | -0.1449 | 0.0177 |
| 1561571_at   | LOC730139 | hypothetical protein LOC730139                                                                  | -0.2383 | 0.0368 |
| 1561579_at   | LOC728445 | hypothetical protein LOC728445                                                                  | -0.1636 | 0.0071 |
| 1561590_a_at | BC038740  | BC038740                                                                                        | -0.1535 | 0.013  |
| 1561602_at   |           | CDNA FLJ25733 fis; clone TST05652                                                               | -0.154  | 0.0278 |
| 1561612_at   |           | CDNA clone IMAGE:5275628                                                                        | -0.1078 | 0.0442 |
| 1561619_at   |           | CDNA clone IMAGE:5269924                                                                        | -0.1234 | 0.049  |
| 1561624_at   |           | CDNA clone IMAGE:5270007                                                                        | -0.1649 | 0.0447 |
| 1561638_at   |           | Full length insert cDNA clone YI46C04                                                           | -0.1278 | 0.0072 |
| 1561650_s_at | LOC285692 | hypothetical protein LOC285692                                                                  | -0.128  | 0.0033 |
| 1561666_a_at | KIAA1908  | KIAA1908 protein                                                                                | -0.182  | 0.0365 |
| 1561668_at   |           | CDNA clone IMAGE:5269842                                                                        | -0.1241 | 0.006  |
| 1561679_at   |           | MRNA; cDNA DKFZp434I039 (from clone DKFZp434I039)                                               | -0.1142 | 0.0249 |
| 1561688_at   |           | CDNA clone IMAGE:5267671                                                                        | -0.1372 | 0.0406 |
| 1561693_at   | LOC400794 | hypothetical gene supported by BC030596                                                         | -0.101  | 0.0179 |
| 1561707_at   |           | Hypothetical gene supported by AK057431; mRNA (cDNA clone MGC:126199 IMAGE:40033953)            | -0.1546 | 0.0231 |
| 1561708_at   | C6orf150  | chromosome 6 open reading frame 150                                                             | -0.11   | 0.0226 |
| 1561723_at   | LOC339894 | hypothetical protein LOC339894                                                                  | -0.1197 | 0.0177 |
| 1561728_a_at | LOC400238 | hypothetical gene supported by AK093266                                                         | -0.1182 | 0.0395 |
| 1561872_at   |           |                                                                                                 | -0.145  | 0.0035 |
| 1561880_a_at | SIGLECP16 | sialic acid binding Ig-like lectin; pseudogene 16                                               | -0.1722 | 0.0425 |
| 1561908_a_at | HS3ST3B1  | Heparan sulfate (glucosamine) 3-O-sulfotransferase 3B1                                          | -0.1873 | 0.0011 |
| 1561910_at   |           | CDNA clone IMAGE:5300947                                                                        | -0.1571 | 0.011  |
| 1561927_at   | C3orf16   | chromosome 3 open reading frame 16                                                              | -0.1118 | 0.0345 |
| 1561940_at   | POLE      | polymerase (DNA directed); epsilon                                                              | -0.1624 | 0.0056 |
| 1561942_x_at |           | CDNA FLJ34475 fis; clone HLUNG2003716; moderately similar to RETROVIRUS-RELATED ENV POLYPROTEIN | -0.3626 | 0.0169 |
| 1561984_at   |           | CDNA clone IMAGE:4822215                                                                        | -0.1161 | 0.0187 |
| 1561997_at   | LOC440061 | Hypothetical LOC440061                                                                          | -0.1562 | 0.0109 |

|              |           |                                                                                                                 |         |        |
|--------------|-----------|-----------------------------------------------------------------------------------------------------------------|---------|--------|
| 1562002_at   | MYOZ3     | myozenin 3                                                                                                      | -0.2057 | 0.0013 |
| 1562004_x_at | MYOZ3     | myozenin 3                                                                                                      | -0.1545 | 0.0052 |
| 1562006_at   |           | CDNA clone IMAGE:5286322                                                                                        | -0.1103 | 0.0107 |
| 1562044_at   |           | CDNA clone IMAGE:5270804                                                                                        | -0.1446 | 0.006  |
| 1562059_at   |           | CDNA FLJ90139 fis; clone HEMBB1001026; highly similar to Transmembrane 9 superfamily protein member 3 precursor | -0.2387 | 0.0071 |
| 1562065_at   |           | CDNA clone IMAGE:5270453                                                                                        | -0.1434 | 0.0419 |
| 1562073_at   |           | CDNA clone IMAGE:4830065                                                                                        | -0.1314 | 0.0436 |
| 1562078_at   |           | CDNA FLJ32953 fis; clone TESTI2008099                                                                           | -0.1235 | 0.0246 |
| 1562144_at   |           | Full length insert cDNA YR39D03                                                                                 | -1.5362 | 0      |
| 1562194_at   |           | Full length insert cDNA clone YW28D08                                                                           | -1.5737 | 0.0001 |
| 1562234_a_at | LOC652725 | neuron navigator 3, similar to neuron navigator 3                                                               | -0.2127 | 0.0048 |
| 1562247_at   | LOC286058 | hypothetical protein LOC286058                                                                                  | -0.2463 | 0.0001 |
| 1562260_at   |           | MRNA; cDNA DKFZp667M0710 (from clone DKFZp667M0710)                                                             | -0.7272 | 0.0018 |
| 1562261_at   | AMZ1      | archaemetzincin-1                                                                                               | -0.1246 | 0.0453 |
| 1562264_at   | LOC339685 | hypothetical protein LOC339685                                                                                  | -0.1404 | 0.0315 |
| 1562265_at   |           | MRNA; cDNA DKFZp3131020 (from clone DKFZp3131020)                                                               | -0.4562 | 0.0028 |
| 1562275_at   |           | MRNA; cDNA DKFZp667P1024 (from clone DKFZp667P1024)                                                             | -0.8684 | 0.0177 |
| 1562286_at   |           | CDNA clone IMAGE:4274877                                                                                        | -0.1287 | 0.0137 |
| 1562288_at   |           | CDNA clone IMAGE:5262193                                                                                        | -0.1522 | 0.0297 |
| 1562296_at   |           | CDNA clone IMAGE:4828037                                                                                        | -0.1103 | 0.0161 |
| 1562308_at   | LOC283682 | hypothetical protein LOC283682                                                                                  | -0.142  | 0.0011 |
| 1562310_at   |           | CDNA clone IMAGE:4838759                                                                                        | -0.1013 | 0.0368 |
| 1562317_at   | LOC121006 | hypothetical protein LOC121006                                                                                  | -0.1443 | 0.0062 |
| 1562319_at   | FLJ39743  | hypothetical protein FLJ39743                                                                                   | -0.1801 | 0.0025 |
| 1562321_at   | PDK4      | pyruvate dehydrogenase kinase; isozyme 4                                                                        | -1.7098 | 0.042  |
| 1562323_at   |           | MRNA; cDNA DKFZp313M0331 (from clone DKFZp313M0331)                                                             | -0.1631 | 0.0237 |
| 1562324_a_at |           | MRNA; cDNA DKFZp313M0331 (from clone DKFZp313M0331)                                                             | -0.1788 | 0.0045 |
| 1562348_at   | LOC400680 | hypothetical gene supported by AK097381; BC040866                                                               | -0.3096 | 0.0004 |
| 1562358_at   |           | Homo sapiens; clone IMAGE:4430231; mRNA                                                                         | -0.1515 | 0.0143 |
| 1562389_at   |           | CDNA clone IMAGE:4818734                                                                                        | -0.1331 | 0.0122 |
| 1562414_at   |           | CDNA clone IMAGE:4797124                                                                                        | -0.1127 | 0.0226 |
| 1562416_at   |           | CDNA clone IMAGE:5272221                                                                                        | -0.2673 | 0.0099 |
| 1562425_at   | FARP1     | FERM; RhoGEF (ARHGEF) and pleckstrin domain protein 1 (chondrocyte-derived)                                     | -0.1089 | 0.0167 |
| 1562449_s_at |           | Homo sapiens; clone IMAGE:5170410; mRNA                                                                         | -0.1945 | 0.0001 |
| 1562453_at   |           | MRNA; cDNA DKFZp686F1318 (from clone DKFZp686F1318)                                                             | -0.1403 | 0.0313 |

|              |           |                                                                         |         |        |
|--------------|-----------|-------------------------------------------------------------------------|---------|--------|
| 1562456_at   |           | MRNA; cDNA DKFZp566C0924 (from clone DKFZp566C0924)                     | -0.1766 | 0.0105 |
| 1562462_at   | DNAH10    | dynein; axonemal; heavy chain 10                                        | -0.2282 | 0.0026 |
| 1562480_at   |           | CDNA clone IMAGE:5269961                                                | -0.1022 | 0.0404 |
| 1562495_at   | ANKFY1    | Ankyrin repeat and FYVE domain containing 1                             | -0.1177 | 0.0187 |
| 1562509_at   |           | CDNA clone IMAGE:5284659                                                | -0.1139 | 0.033  |
| 1562510_at   | LOC339442 | hypothetical protein LOC339442                                          | -0.1042 | 0.0402 |
| 1562511_at   | LYST      | lysosomal trafficking regulator                                         | -0.1685 | 0.0043 |
| 1562563_at   | HCN1      | hyperpolarization activated cyclic nucleotide-gated potassium channel 1 | -0.1228 | 0.0297 |
| 1562573_at   | CYP17A1   | cytochrome P450; family 17; subfamily A; polypeptide 1                  | -1.5344 | 0.0017 |
| 1562577_at   |           | Homo sapiens; clone IMAGE:4546564; mRNA                                 | -0.1487 | 0.0205 |
| 1562586_at   |           | CDNA clone IMAGE:4903593                                                | -0.1685 | 0.0322 |
| 1562601_at   | UNQ6975   | NGNL6975                                                                | -0.1896 | 0.0033 |
| 1562604_at   |           | CDNA FLJ37024 fis; clone BRACE2010837                                   | -0.1996 | 0.0178 |
| 1562610_at   |           | CDNA clone IMAGE:4830466                                                | -0.1415 | 0.0244 |
| 1562617_at   | LOC340074 | hypothetical protein LOC340074                                          | -0.1457 | 0.0159 |
| 1562637_at   | SAMD12    | sterile alpha motif domain containing 12                                | -0.1879 | 0.0077 |
| 1562643_at   |           | CDNA clone IMAGE:5297062                                                | -0.1853 | 0.0084 |
| 1562671_s_at |           | CDNA FLJ35982 fis; clone TESTI2013604                                   | -0.1259 | 0.0389 |
| 1562674_at   |           | Homo sapiens; clone IMAGE:5165176; mRNA                                 | -0.1304 | 0.0402 |
| 1562689_at   | LOC151484 | hypothetical protein LOC151484                                          | -0.1922 | 0.0006 |
| 1562693_at   |           | CDNA FLJ40517 fis; clone TESTI2046686                                   | -0.1079 | 0.0375 |
| 1562713_a_at | NETO1     | neuropilin (NRP) and tolloid (TLL)-like 1                               | -0.1149 | 0.0297 |
| 1562724_at   | LOC286114 | hypothetical protein LOC286114                                          | -0.1291 | 0.0022 |
| 1562728_at   |           | CDNA FLJ40174 fis; clone TESTI2016996                                   | -0.1524 | 0.0026 |
| 1562729_at   |           | CDNA clone IMAGE:4110098                                                | -0.1794 | 0.0177 |
| 1562740_at   | LOC285224 | hypothetical protein LOC285224                                          | -0.1543 | 0.0039 |
| 1562748_at   | LOC253044 | hypothetical protein LOC253044                                          | -0.1517 | 0.0092 |
| 1562749_at   | LOC641912 | hypothetical LOC644090, hypothetical protein LOC641912                  | -0.1332 | 0.0231 |
| 1562751_at   |           | CDNA clone IMAGE:4826129                                                | -0.1792 | 0.0151 |
| 1562771_at   |           | Homo sapiens; clone IMAGE:5759435; mRNA                                 | -0.1265 | 0.0419 |
| 1562785_at   | HERC6     | Hect domain and RLD 6                                                   | -0.1295 | 0.0165 |
| 1562790_at   | NCALD     | neurocalcin delta                                                       | -0.1008 | 0.0101 |
| 1562834_at   |           | CDNA clone IMAGE:5284619                                                | -0.1954 | 0.0082 |
| 1562841_at   | LOC339666 | hypothetical protein LOC339666                                          | -0.1744 | 0.0128 |
| 1562847_at   |           | Homo sapiens; clone IMAGE:5590223; mRNA                                 | -0.1062 | 0.013  |
| 1562852_at   |           | Homo sapiens; clone IMAGE:5440917; mRNA                                 | -0.352  | 0.0001 |

|              |           |                                                          |         |        |
|--------------|-----------|----------------------------------------------------------|---------|--------|
| 1562853_x_at |           | Homo sapiens; clone IMAGE:5440917; mRNA                  | -0.1546 | 0.0028 |
| 1562864_at   |           | Homo sapiens; clone IMAGE:5168221; mRNA                  | -0.2215 | 0.0089 |
| 1562866_at   |           | Homo sapiens; clone IMAGE:4730399; mRNA                  | -0.1297 | 0.0167 |
| 1562885_at   |           | Homo sapiens; clone IMAGE:5750288; mRNA                  | -0.1022 | 0.0112 |
| 1562890_at   |           | CDNA clone IMAGE:4301684                                 | -0.1505 | 0.0027 |
| 1562898_at   |           | MRNA; cDNA DKFZp667K1916 (from clone DKFZp667K1916)      | -0.2116 | 0.0442 |
| 1562906_at   | LOC340069 | hypothetical protein LOC340069                           | -0.137  | 0.0027 |
| 1562910_at   | SH3PXD2B  | SH3 and PX domains 2B                                    | -0.2375 | 0.0008 |
| 1562915_at   |           | CDNA clone IMAGE:4823328                                 | -0.182  | 0.0137 |
| 1562916_at   | LOC729062 | Hypothetical protein LOC729062                           | -0.2008 | 0.0013 |
| 1562945_at   |           | CDNA clone IMAGE:3920381                                 | -0.1344 | 0.0167 |
| 1562965_at   |           | Homo sapiens; clone IMAGE:5744268; mRNA                  | -0.1207 | 0.0096 |
| 1562966_at   | KIAA1217  | KIAA1217                                                 | -0.1956 | 0.0083 |
| 1562972_at   | LOC503519 | hypothetical LOC503519                                   | -0.1474 | 0.009  |
| 1562974_at   |           | CDNA clone IMAGE:5302821                                 | -0.1666 | 0.0059 |
| 1563035_x_at | GPD1      | glycerol-3-phosphate dehydrogenase 1 (soluble)           | -0.1258 | 0.005  |
| 1563036_at   |           | CDNA clone IMAGE:4795841                                 | -0.1108 | 0.0449 |
| 1563038_at   |           | Homo sapiens; clone IMAGE:3917623; mRNA                  | -0.1269 | 0.0264 |
| 1563042_at   | LOC338694 | hypothetical protein LOC338694                           | -0.2118 | 0      |
| 1563064_at   |           | Homo sapiens; clone IMAGE:5760168; mRNA                  | -0.1304 | 0.0478 |
| 1563071_at   |           | CDNA clone IMAGE:5223358                                 | -0.2864 | 0      |
| 1563078_at   |           | Homo sapiens; clone IMAGE:5749668; mRNA                  | -0.124  | 0.006  |
| 1563081_at   |           | Homo sapiens; clone IMAGE:5744960; mRNA                  | -0.1452 | 0.0087 |
| 1563086_at   |           | CDNA clone IMAGE:5526877                                 | -0.1252 | 0.0252 |
| 1563090_at   | CCDC33    | coiled-coil domain containing 33                         | -0.1961 | 0.0148 |
| 1563108_at   | LRRC62    | leucine rich repeat containing 62                        | -0.101  | 0.0487 |
| 1563113_at   | UBR4      | ubiquitin protein ligase E3 component n-recognin 4       | -0.3457 | 0      |
| 1563118_at   |           | CDNA: FLJ20923 fis; clone ADSE00893                      | -0.111  | 0.0382 |
| 1563142_at   |           | Homo sapiens; clone IMAGE:5721993; mRNA                  | -0.2446 | 0.0041 |
| 1563157_at   |           | Homo sapiens; clone IMAGE:5744232; mRNA                  | -0.1465 | 0.0109 |
| 1563165_at   |           | CDNA clone IMAGE:3638910                                 | -0.1411 | 0.0398 |
| 1563171_at   |           | CDNA clone IMAGE:5165280                                 | -0.2139 | 0.0034 |
| 1563178_at   |           | Homo sapiens; clone IMAGE:5538207; mRNA                  | -0.13   | 0.0181 |
| 1563182_at   |           | CDNA clone IMAGE:4796641                                 | -0.2961 | 0.0045 |
| 1563243_at   |           | MRNA; cDNA DKFZp434M242 (from clone DKFZp434M242)        | -0.1786 | 0.0443 |
| 1563263_at   | PLCG2     | Phospholipase C; gamma 2 (phosphatidylinositol-specific) | -0.1619 | 0.0084 |

|              |           |                                                           |         |        |
|--------------|-----------|-----------------------------------------------------------|---------|--------|
| 1563300_at   | LOC387826 | Hypothetical LOC387826                                    | -0.1256 | 0.0337 |
| 1563324_at   | LOC389457 | hypothetical protein LOC389457                            | -0.1312 | 0.0453 |
| 1563327_a_at | CXorf31   | chromosome X open reading frame 31                        | -0.1376 | 0.0133 |
| 1563357_at   |           | MRNA; cDNA DKFZp564C203 (from clone DKFZp564C203)         | -1.3247 | 0.0012 |
| 1563373_at   |           | CDNA clone IMAGE:5417528                                  | -0.1123 | 0.0058 |
| 1563405_at   | ATP4B     | ATPase; H+/K+ exchanging; beta polypeptide                | -0.2588 | 0.0062 |
| 1563407_x_at | ATP4B     | ATPase; H+/K+ exchanging; beta polypeptide                | -0.2559 | 0.0041 |
| 1563414_at   |           | Full length insert cDNA clone YW28F05                     | -1.3927 | 0.0001 |
| 1563425_at   |           | Clone IMAGE:429302; mRNA sequence                         | -0.1326 | 0.0201 |
| 1563466_at   | MYLK      | myosin; light chain kinase                                | -0.1329 | 0.0087 |
| 1563489_at   | LOC285638 | hypothetical protein LOC285638                            | -0.1257 | 0.0235 |
| 1563536_at   |           | MRNA; cDNA DKFZp564N093 (from clone DKFZp564N093)         | -0.1063 | 0.0472 |
| 1563541_at   |           | MRNA; cDNA DKFZp686N1648 (from clone DKFZp686N1648)       | -0.1689 | 0.0132 |
| 1563571_at   | LOC285463 | hypothetical protein LOC285463                            | -0.1738 | 0.0027 |
| 1563587_at   | CDH4      | cadherin 4; type 1; R-cadherin (retinal)                  | -0.1355 | 0.0361 |
| 1563597_at   |           | MRNA; cDNA DKFZp666P238 (from clone DKFZp666P238)         | -0.2374 | 0.0079 |
| 1563610_at   | LOC157273 | hypothetical protein LOC157273                            | -0.1241 | 0.0412 |
| 1563632_at   | LOC220980 | hypothetical protein LOC220980                            | -0.129  | 0.0358 |
| 1563639_a_at | FHAD1     | forkhead-associated (FHA) phosphopeptide binding domain 1 | -0.2    | 0.0279 |
| 1563658_a_at | SYT9      | synaptotagmin IX                                          | -0.5278 | 0.001  |
| 1563792_at   | AMN       | Amnionless homolog (mouse)                                | -0.1045 | 0.0329 |
| 1563793_at   |           | CDNA FLJ36795 fis; clone ADRGL2006767                     | -0.5387 | 0      |
| 1563800_at   | LOC283140 | hypothetical protein LOC283140                            | -0.3164 | 0.0008 |
| 1563808_at   | MCF2L     | MCF.2 cell line derived transforming sequence-like        | -0.3036 | 0.0082 |
| 1563834_a_at | C1orf62   | chromosome 1 open reading frame 62                        | -0.1373 | 0.0422 |
| 1563840_at   |           |                                                           | -0.1404 | 0.0341 |
| 1563842_at   | PIGG      | phosphatidylinositol glycan anchor biosynthesis; class G  | -0.2763 | 0.0221 |
| 1563860_at   | LOC400965 | hypothetical gene supported by AK098018                   | -0.1419 | 0.0021 |
| 1563868_a_at | C9orf79   | chromosome 9 open reading frame 79                        | -0.1677 | 0.0091 |
| 1563878_a_at | LOC338963 | hypothetical protein LOC338963                            | -0.1316 | 0.03   |
| 1563898_at   |           | CDNA FLJ34764 fis; clone NT2NE2002311                     | -0.1546 | 0.042  |
| 1563900_at   | FAM83B    | family with sequence similarity 83; member B              | -0.1371 | 0.0059 |
| 1563902_at   |           | CDNA FLJ23888 fis; clone LNG14336                         | -0.2312 | 0.0001 |
| 1563903_x_at |           | CDNA FLJ23888 fis; clone LNG14336                         | -0.1785 | 0.0001 |

|              |           |                                                                      |         |        |
|--------------|-----------|----------------------------------------------------------------------|---------|--------|
| 1563943_at   | PPARGC1B  | peroxisome proliferator-activated receptor gamma; coactivator 1 beta | -0.1883 | 0.0011 |
| 1563946_at   |           |                                                                      | -0.1766 | 0.0202 |
| 1564000_at   | ANKRD31   | ankyrin repeat domain 31                                             | -0.125  | 0.0493 |
| 1564021_at   |           | CDNA FLJ37693 fis; clone BRHIP2014954                                | -0.1551 | 0.0263 |
| 1564022_at   | ZNF804B   | zinc finger protein 804B                                             | -0.1093 | 0.027  |
| 1564044_at   | KNCN      | kinocilin                                                            | -0.1142 | 0.0408 |
| 1564056_at   |           | MRNA; cDNA DKFZp667N093 (from clone DKFZp667N093)                    | -0.163  | 0.0094 |
| 1564060_at   | LOC144742 | hypothetical protein LOC144742                                       | -0.1867 | 0.0023 |
| 1564117_at   | HMCN2     | hemicentin 2                                                         | -0.1995 | 0.001  |
| 1564122_at   | LOC283875 | hypothetical protein LOC283875                                       | -0.1864 | 0.0062 |
| 1564125_at   | LOC285857 | hypothetical protein LOC285857                                       | -0.1261 | 0.0428 |
| 1564144_at   |           | CDNA FLJ35206 fis; clone PLACE6018843                                | -0.106  | 0.038  |
| 1564149_at   |           | CDNA FLJ40615 fis; clone THYMU2012882                                | -0.1307 | 0.0235 |
| 1564193_at   | FLJ39061  | hypothetical protein FLJ39061                                        | -0.2415 | 0.0059 |
| 1564198_a_at | C10orf90  | chromosome 10 open reading frame 90                                  | -0.2591 | 0.0001 |
| 1564203_at   | LOC147004 | hypothetical protein LOC147004                                       | -0.1203 | 0.029  |
| 1564224_x_at | UNQ2963   | hypothetical protein LOC283314                                       | -0.1871 | 0.0199 |
| 1564242_at   |           | CDNA FLJ32713 fis; clone TESTI2000756                                | -0.215  | 0.0149 |
| 1564251_at   | EMID1     | EMI domain containing 1                                              | -0.1066 | 0.009  |
| 1564254_at   | KY        | kyphoscoliosis peptidase                                             | -0.1341 | 0.0196 |
| 1564263_at   | LOC144817 | hypothetical protein LOC144817                                       | -0.1711 | 0.0031 |
| 1564264_at   |           | Homo sapiens; clone IMAGE:5590162; mRNA                              | -0.2357 | 0.0017 |
| 1564281_at   | LOC285708 | hypothetical protein LOC285708                                       | -0.2896 | 0.0191 |
| 1564319_at   | C19orf16  | chromosome 19 open reading frame 16                                  | -0.1521 | 0.0321 |
| 1564358_at   |           | CDNA: FLJ22631 fis; clone HSI06451                                   | -0.3045 | 0.0119 |
| 1564379_at   |           |                                                                      | -0.1687 | 0.0024 |
| 1564386_at   | TXNDC8    | thioredoxin domain containing 8 (spermatozoa)                        | -0.1551 | 0.002  |
| 1564391_at   |           | CDNA: FLJ20911 fis; clone ADSE00547                                  | -0.1361 | 0.0215 |
| 1564403_at   | TOPORS    | topoisomerase I binding; arginine/serine-rich                        | -0.2253 | 0.0015 |
| 1564413_at   |           |                                                                      | -0.1199 | 0.0453 |
| 1564421_at   |           | CDNA FLJ36093 fis; clone TESTI2020579                                | -0.1368 | 0.0014 |
| 1564429_at   |           | MRNA; cDNA DKFZp434C2216 (from clone DKFZp434C2216)                  | -0.1467 | 0.0142 |
| 1564431_a_at | FLJ45224  | FLJ45224 protein                                                     | -0.1599 | 0.0122 |
| 1564460_at   | LOC286442 | hypothetical protein LOC286442                                       | -0.1723 | 0.0031 |
| 1564520_s_at | PRMT5     | protein arginine methyltransferase 5                                 | -0.4558 | 0.0377 |
| 1564537_a_at | ASB10     | ankyrin repeat and SOCS box-containing 10                            | -0.1299 | 0.0307 |



|              |           |                                                                    |         |        |
|--------------|-----------|--------------------------------------------------------------------|---------|--------|
| 1564573_at   | LOC402778 | similar to RIKEN cDNA 6330512M04 gene (mouse)                      | -1.5356 | 0.0003 |
| 1564584_at   |           | CDNA FLJ25771 fis; clone TST06415                                  | -0.1194 | 0.0447 |
| 1564595_at   |           | Homo sapiens; clone IMAGE:5745181; mRNA                            | -0.1188 | 0.0228 |
| 1564603_at   | NUT       | nuclear protein in testis                                          | -0.1725 | 0.0199 |
| 1564620_at   |           |                                                                    | -0.1069 | 0.0251 |
| 1564660_at   |           | CDNA FLJ36900 fis; clone BRACE2001954                              | -0.1143 | 0.0316 |
| 1564685_a_at |           | Homo sapiens; clone IMAGE:5168221; mRNA                            | -0.1421 | 0.0295 |
| 1564713_a_at | FOXN4     | forkhead box N4                                                    | -0.1727 | 0.0366 |
| 1564729_at   |           | Homo sapiens; clone IMAGE:3891207; mRNA                            | -0.2136 | 0.0012 |
| 1564760_at   |           | CDNA clone IMAGE:4694535                                           | -0.1126 | 0.0199 |
| 1564778_at   |           | MRNA; cDNA DKFZp434D2122 (from clone DKFZp434D2122)                | -0.1934 | 0.0048 |
| 1564783_x_at | OFCC1     | orofacial cleft 1 candidate 1                                      | -0.1353 | 0.0254 |
| 1564796_at   | EMP1      | epithelial membrane protein 1                                      | -1.329  | 0.0003 |
| 1564816_at   | C14orf178 | chromosome 14 open reading frame 178                               | -0.2091 | 0.0127 |
| 1564828_at   | KIAA1211  | KIAA1211 protein                                                   | -0.1275 | 0.0107 |
| 1564840_at   |           | MRNA; cDNA DKFZp564B236 (from clone DKFZp564B236)                  | -0.3298 | 0      |
| 1564876_s_at | FOXP2     | forkhead box P2                                                    | -0.1158 | 0.0355 |
| 1564905_at   |           | EST from clone DKFZp434P1912; 3' end                               | -0.1891 | 0.0039 |
| 1564921_at   | KRTAP13-1 | keratin associated protein 13-1                                    | -0.155  | 0.0059 |
| 1564985_a_at | SLC8A1    | solute carrier family 8 (sodium/calcium exchanger); member 1       | -0.1882 | 0.0032 |
| 1565002_at   |           | CDNA FLJ20229 fis; clone COLF5247                                  | -0.1298 | 0.0021 |
| 1565082_x_at | SRC       | v-src sarcoma (Schmidt-Ruppin A-2) viral oncogene homolog (avian)  | -0.1037 | 0.0077 |
| 1565105_at   |           |                                                                    | -0.1305 | 0.0449 |
| 1565107_x_at |           |                                                                    | -0.1185 | 0.0492 |
| 1565132_at   | RBM3AP    | RNA binding motif protein; Y-linked; family 3; member A pseudogene | -0.1189 | 0.0474 |
| 1565162_s_at | MGST1     | microsomal glutathione S-transferase 1                             | -2.2369 | 0.0201 |
| 1565282_at   |           |                                                                    | -0.1982 | 0.004  |
| 1565320_at   | RBM3AP    | RNA binding motif protein; Y-linked; family 3; member A pseudogene | -0.4517 | 0.0084 |
| 1565337_at   | DNAH6     | dynein; axonemal; heavy chain 6                                    | -0.1956 | 0.0068 |
| 1565358_at   | RARA      | retinoic acid receptor; alpha                                      | -0.2269 | 0.0008 |
| 1565537_at   | NKX1-1    | NK1 homeobox 1                                                     | -0.1176 | 0.0463 |
| 1565556_at   | LOC127841 | hypothetical protein LOC127841                                     | -0.1181 | 0.0249 |
| 1565562_at   | MAGIX     | MAGI family member; X-linked                                       | -0.1864 | 0.0371 |
| 1565581_at   |           | CDNA clone IMAGE:4828937                                           | -0.2303 | 0.0002 |
| 1565587_at   |           | CDNA clone IMAGE:4828283                                           | -0.1163 | 0.0266 |

|              |           |                                                       |         |        |
|--------------|-----------|-------------------------------------------------------|---------|--------|
| 1565598_at   |           | Homo sapiens; clone IMAGE:4275461; mRNA               | -1.1599 | 0.0012 |
| 1565603_at   | PWP2      | PWP2 periodic tryptophan protein homolog (yeast)      | -0.1714 | 0.0268 |
| 1565612_at   | DYNLRB1   | Dynein; light chain; roadblock-type 1                 | -0.1417 | 0.0148 |
| 1565613_at   |           | CDNA clone IMAGE:6573900                              | -0.1386 | 0.0164 |
| 1565628_at   |           | Full length insert cDNA clone ZD55G10                 | -0.2596 | 0.0008 |
| 1565638_at   |           | MRNA; cDNA DKFZp686P21116 (from clone DKFZp686P21116) | -0.2271 | 0.0146 |
| 1565639_a_at |           | MRNA; cDNA DKFZp686P21116 (from clone DKFZp686P21116) | -0.5686 | 0.0104 |
| 1565650_at   |           |                                                       | -0.1159 | 0.0462 |
| 1565651_at   | ARF1      | ADP-ribosylation factor 1                             | -0.4804 | 0.0099 |
| 1565656_x_at |           | CDNA FLJ36440 fis; clone THYMU2012565                 | -0.1248 | 0.0143 |
| 1565660_at   | FUT6      | Fucosyltransferase 6 (alpha (1;3) fucosyltransferase) | -0.2564 | 0      |
| 1565661_x_at | FUT6      | Fucosyltransferase 6 (alpha (1;3) fucosyltransferase) | -0.1661 | 0.007  |
| 1565674_at   | FCGR2A    | Fc fragment of IgG; low affinity IIa; receptor (CD32) | -0.2954 | 0.0097 |
| 1565714_at   |           | Full length insert cDNA clone YS05E02                 | -0.2178 | 0.0018 |
| 1565730_at   |           | MRNA; cDNA DKFZp434E145 (from clone DKFZp434E145)     | -0.1132 | 0.0275 |
| 1565751_at   |           | Transcribed locus                                     | -0.1268 | 0.0193 |
| 1565752_at   | FGD2      | FYVE; RhoGEF and PH domain containing 2               | -0.2377 | 0.05   |
| 1565768_at   |           | Homo sapiens; clone IMAGE:4272620; mRNA               | -0.1431 | 0.0188 |
| 1565784_at   |           | CDNA FLJ36796 fis; clone ADRGL2006817                 | -0.1286 | 0.0087 |
| 1565795_at   | DUOX1     | dual oxidase 1                                        | -0.1478 | 0.001  |
| 1565801_at   |           | CDNA clone IMAGE:4796818                              | -0.1087 | 0.0412 |
| 1565805_at   | LOC728011 | hypothetical protein LOC728011                        | -0.1004 | 0.0284 |
| 1565814_at   | TRIM36    | tripartite motif-containing 36                        | -0.132  | 0.0278 |
| 1565832_at   | ANKRD15   | Ankyrin repeat domain 15                              | -0.1426 | 0.0482 |
| 1565843_s_at | BRPF3     | bromodomain and PHD finger containing; 3              | -0.1303 | 0.0265 |
| 1565879_at   |           | Full length insert cDNA clone YQ73D03                 | -0.2019 | 0.0043 |
| 1565882_at   |           | CDNA FLJ12064 fis; clone HEMBB1002232                 | -0.1948 | 0.0102 |
| 1565911_at   |           | MRNA full length insert cDNA clone EUROIMAGE 209544   | -0.2296 | 0.0115 |
| 1565918_a_at |           | MRNA from chromosome 5q21-22; clone:LI26              | -0.1321 | 0.0046 |
| 1565974_at   |           | CDNA FLJ23646 fis; clone COL03258                     | -0.1372 | 0.0013 |
| 1565998_at   | LOC286299 | hypothetical protein LOC286299                        | -0.1931 | 0.001  |
| 1566002_at   |           | CDNA FLJ38745 fis; clone KIDNE2012291                 | -0.2224 | 0.0084 |
| 1566003_x_at |           | CDNA FLJ38745 fis; clone KIDNE2012291                 | -0.1817 | 0.0286 |
| 1566038_at   | DGCR7     | DiGeorge syndrome critical region gene 7              | -0.187  | 0.0127 |

|              |           |                                                                |         |        |
|--------------|-----------|----------------------------------------------------------------|---------|--------|
| 1566079_at   | LOC647190 | similar to 40S ribosomal protein S16                           | -1.5446 | 0.0016 |
| 1566086_at   |           | MRNA; cDNA DKFZp667A1714 (from clone DKFZp667A1714)            | -0.1347 | 0.0162 |
| 1566097_at   |           | MRNA; cDNA DKFZp761K02121 (from clone DKFZp761K02121)          | -0.1075 | 0.0197 |
| 1566115_at   |           | MRNA; cDNA DKFZp666E186 (from clone DKFZp666E186)              | -0.4054 | 0.0037 |
| 1566123_at   | FABP6     | fatty acid binding protein 6; ileal (gastrotropin)             | -0.1414 | 0.012  |
| 1566136_at   |           |                                                                | -0.1519 | 0.0385 |
| 1566140_at   | HOP       | homeodomain-only protein                                       | -0.4978 | 0.0003 |
| 1566141_at   |           | CDNA FLJ37949 fis; clone CTONG2009156                          | -0.1239 | 0.0245 |
| 1566149_at   | CALML4    | Calmodulin-like 4                                              | -0.1533 | 0.0207 |
| 1566156_at   |           | Homo sapiens; clone IMAGE:5198544; mRNA                        | -0.1181 | 0.0429 |
| 1566171_at   | RFFL      | ring finger and FYVE-like domain containing 1                  | -0.2019 | 0.0135 |
| 1566195_at   |           | MRNA; cDNA DKFZp313O2015 (from clone DKFZp313O2015)            | -0.1474 | 0.0035 |
| 1566208_at   | TCEA1     | transcription elongation factor A (SII); 1                     | -0.1361 | 0.0289 |
| 1566209_at   |           | CDNA clone IMAGE:4795866                                       | -0.1211 | 0.0025 |
| 1566231_at   |           | MRNA; cDNA DKFZp667I0318 (from clone DKFZp667I0318)            | -0.1456 | 0.003  |
| 1566232_at   |           | MRNA; cDNA DKFZp667I0318 (from clone DKFZp667I0318)            | -0.3564 | 0      |
| 1566236_at   | DGCR12    | DiGeorge syndrome critical region gene 12                      | -0.1409 | 0.0431 |
| 1566242_at   |           | MRNA; cDNA DKFZp547L144 (from clone DKFZp547L144)              | -0.1449 | 0.0178 |
| 1566268_at   |           | Full length insert cDNA YR25G06                                | -0.2978 | 0.003  |
| 1566301_at   | PPP1R11   | Protein phosphatase 1; regulatory (inhibitor) subunit 11       | -0.1314 | 0.0074 |
| 1566324_a_at | MAF       | v-maf musculoaponeurotic fibrosarcoma oncogene homolog (avian) | -0.2676 | 0.0004 |
| 1566362_at   | DNTT      | Deoxynucleotidyltransferase; terminal                          | -0.1347 | 0.0301 |
| 1566427_at   |           | MRNA; cDNA DKFZp667B046 (from clone DKFZp667B046)              | -0.1211 | 0.041  |
| 1566432_at   |           |                                                                | -0.2002 | 0.0021 |
| 1566438_at   | LOC283475 | Hypothetical protein LOC283475                                 | -0.1749 | 0.0004 |
| 1566454_at   |           | FLJ00403 protein                                               | -0.1948 | 0.0074 |
| 1566459_at   |           | CDNA clone IMAGE:4801197                                       | -0.147  | 0.0057 |
| 1566463_at   |           | MRNA; cDNA DKFZp667M159 (from clone DKFZp667M159)              | -0.1248 | 0.0084 |
| 1566471_at   | LOC647305 | similar to all-trans-13;14-dihydroretinol saturase             | -0.1966 | 0.0199 |
| 1566472_s_at | RETSAT    | retinol saturase (all-trans-retinol 13;14-reductase)           | -1.5704 | 0      |
| 1566474_at   |           | MRNA; cDNA DKFZp451O1018 (from clone DKFZp451O1018)            | -0.2095 | 0.0062 |
| 1566476_at   |           |                                                                | -0.1223 | 0.0144 |
| 1566477_at   |           | MRNA; cDNA DKFZp547F1316 (from clone DKFZp547F1316)            | -0.2992 | 0.0001 |

|              |             |                                                                                                  |         |        |
|--------------|-------------|--------------------------------------------------------------------------------------------------|---------|--------|
| 1566484_at   |             | MRNA; cDNA DKFZp666K2010 (from clone DKFZp666K2010)                                              | -0.2197 | 0.0008 |
| 1566490_at   |             | MRNA; cDNA DKFZp547C018 (from clone DKFZp547C018)                                                | -0.1407 | 0.0148 |
| 1566500_at   |             |                                                                                                  | -0.1254 | 0.0152 |
| 1566501_at   |             | CDNA FLJ20787 fis; clone COL02178                                                                | -0.196  | 0.0011 |
| 1566503_at   |             | CDNA clone IMAGE:5265199                                                                         | -0.1215 | 0.0382 |
| 1566509_s_at | FBXO9       | F-box protein 9                                                                                  | -1.2004 | 0.0013 |
| 1566512_at   |             |                                                                                                  | -0.1352 | 0.0124 |
| 1566517_at   |             |                                                                                                  | -0.1057 | 0.0213 |
| 1566537_at   |             | CDNA FLJ33736 fis; clone BRAWH2018514                                                            | -0.1141 | 0.0438 |
| 1566538_at   |             | MRNA; cDNA DKFZp586G081 (from clone DKFZp586G081)                                                | -0.1313 | 0.0404 |
| 1566543_at   |             | CDNA FLJ40975 fis; clone UTERU2013502                                                            | -0.1112 | 0.0417 |
| 1566548_at   |             | MRNA; cDNA DKFZp564C1382 (from clone DKFZp564C1382)                                              | -0.185  | 0.0004 |
| 1566577_at   |             | MRNA; cDNA DKFZp547I1410 (from clone DKFZp547I1410)                                              | -0.1334 | 0.0253 |
| 1566580_at   |             | MRNA; cDNA DKFZp667C1424 (from clone DKFZp667C1424)                                              | -0.1673 | 0.0008 |
| 1566630_at   | LOC652806   | hypothetical protein LOC652806, protein phosphatase 2 (formerly 2A); regulatory subunit B"; beta | -0.3394 | 0.006  |
| 1566677_at   | MMP2        | Matrix metalloproteinase 2 (gelatinase A; 72kDa gelatinase; 72kDa type IV collagenase)           | -0.1327 | 0.0289 |
| 1566689_at   |             | CDNA clone IMAGE:5273707                                                                         | -0.1261 | 0.0179 |
| 1566693_at   |             | CDNA: FLJ20947 fis; clone ADSE01841                                                              | -0.1083 | 0.0098 |
| 1566696_at   |             | CDNA clone IMAGE:5289071                                                                         | -0.1438 | 0.0137 |
| 1566700_at   | VRK3        | vaccinia related kinase 3                                                                        | -0.1198 | 0.0031 |
| 1566701_at   | VRK3        | vaccinia related kinase 3                                                                        | -0.1506 | 0.0128 |
| 1566737_at   | hCG_2036596 | HCG2036596                                                                                       | -0.1092 | 0.0173 |
| 1566760_at   | FLJ34208    | hypothetical gene supported by AK091527                                                          | -0.1443 | 0.0364 |
| 1566763_at   |             | CDNA clone IMAGE:5277680                                                                         | -0.1    | 0.0399 |
| 1566775_at   | DNAH1       | dynein; axonemal; heavy chain 1                                                                  | -0.1935 | 0.0358 |
| 1566779_at   |             | MRNA; cDNA DKFZp547C083 (from clone DKFZp547C083)                                                | -0.1747 | 0.0117 |
| 1566803_at   |             | CDNA: FLJ20901 fis; clone ADSE00109                                                              | -0.1331 | 0.0387 |
| 1566807_a_at |             | CDNA clone IMAGE:5272727                                                                         | -0.1024 | 0.0221 |
| 1566814_at   | FGF22       | Fibroblast growth factor 22                                                                      | -0.1507 | 0.0328 |
| 1566816_at   | FGF22       | Fibroblast growth factor 22                                                                      | -0.12   | 0.0198 |
| 1566821_at   |             | CDNA FLJ32664 fis; clone TEST11000088                                                            | -0.1319 | 0.0313 |
| 1566835_at   |             | MRNA; cDNA DKFZp666I029 (from clone DKFZp666I029)                                                | -0.223  | 0.0005 |
| 1566884_at   | C17orf84    | Chromosome 17 open reading frame 84                                                              | -0.1644 | 0.002  |
| 1566903_at   |             | MRNA; cDNA DKFZp547G039 (from clone DKFZp547G039)                                                | -0.1255 | 0.0318 |

|              |           |                                                                  |         |        |
|--------------|-----------|------------------------------------------------------------------|---------|--------|
| 1566926_at   | C21orf104 | chromosome 21 open reading frame 104                             | -0.1413 | 0.0461 |
| 1566935_at   | TYRO3P    | TYRO3P protein tyrosine kinase pseudogene                        | -0.1083 | 0.034  |
| 1566937_at   |           | CDNA FLJ20009 fis; clone ADKA03183                               | -0.1071 | 0.0318 |
| 1566948_at   |           | MRNA; cDNA DKFZp547K228 (from clone DKFZp547K228)                | -0.8199 | 0.0021 |
| 1566957_at   | OR7E104P  | olfactory receptor; family 7; subfamily E; member 104 pseudogene | -0.4753 | 0.0139 |
| 1566963_at   |           |                                                                  | -0.1589 | 0.0013 |
| 1566967_at   |           | CDNA: FLJ20903 fis; clone ADSE00222                              | -0.1731 | 0.0178 |
| 1566974_at   |           | MRNA; cDNA DKFZp434M1135 (from clone DKFZp434M1135)              | -0.1487 | 0.0061 |
| 1566989_at   | ARID1B    | AT rich interactive domain 1B (SWI1-like)                        | -0.2415 | 0.0141 |
| 1566990_x_at | ARID1B    | AT rich interactive domain 1B (SWI1-like)                        | -0.2723 | 0.0028 |
| 1567022_at   | OR5AK4P   | olfactory receptor; family 5; subfamily AK; member 4 pseudogene  | -0.237  | 0.0133 |
| 1567023_at   | OR5AK4P   | olfactory receptor; family 5; subfamily AK; member 4 pseudogene  | -0.1487 | 0.0051 |
| 1567027_at   | SH3GLP2   | SH3-domain GRB2-like pseudogene 2                                | -0.1233 | 0.0058 |
| 1567036_at   | C20orf181 | chromosome 20 open reading frame 181                             | -0.1314 | 0.0341 |
| 1567068_at   | OR4D1     | olfactory receptor; family 4; subfamily D; member 1              | -0.1386 | 0.0452 |
| 1567140_at   |           | TTY2 gene; clone TTY2L12A                                        | -0.1277 | 0.0198 |
| 1567166_at   |           |                                                                  | -0.1849 | 0.0014 |
| 1567219_at   |           |                                                                  | -0.6592 | 0      |
| 1567223_at   | HMGA2     | high mobility group AT-hook 2                                    | -0.1772 | 0.0041 |
| 1567252_at   | OR10D3P   | olfactory receptor; family 10; subfamily D; member 3 pseudogene  | -0.1182 | 0.0258 |
| 1567256_at   | OR1J2     | olfactory receptor; family 1; subfamily J; member 2              | -0.1394 | 0.0172 |
| 1567274_at   |           |                                                                  | -0.1325 | 0.0295 |
| 1567282_at   | OR1J4     | olfactory receptor; family 1; subfamily J; member 4              | -0.1421 | 0.0077 |
| 1567284_at   | OR1J4     | olfactory receptor; family 1; subfamily J; member 4              | -0.1283 | 0.0059 |
| 1567297_at   | OR13C4    | olfactory receptor; family 13; subfamily C; member 4             | -0.1554 | 0.0122 |
| 1567298_at   | OR13C4    | olfactory receptor; family 13; subfamily C; member 4             | -0.1731 | 0.0038 |
| 1567319_at   | LOC57802  | putative ATP-binding cassette protein                            | -0.1808 | 0.0045 |
| 1567320_at   | LOC57802  | putative ATP-binding cassette protein                            | -0.1344 | 0.0187 |
| 1567333_at   |           | MRNA adjacent to 3' end of integrated HPV16 (INT421)             | -0.1298 | 0.0238 |
| 1567341_at   | FOXD4     | forkhead box D4                                                  | -0.1889 | 0.0007 |
| 1567375_at   |           | Trapped 3' terminal exon; clone B2E8                             | -0.1883 | 0.0268 |
| 1567376_at   | DNAH1     | dynein; axonemal; heavy chain 1                                  | -0.109  | 0.0479 |

|              |           |                                                                           |         |        |
|--------------|-----------|---------------------------------------------------------------------------|---------|--------|
| 1567389_at   |           | Trapped 3' terminal exon; clone C2B5                                      | -0.1516 | 0.0033 |
| 1567410_at   | ZNF135    | zinc finger protein 135                                                   | -0.141  | 0.0291 |
| 1567519_at   | PLXNA3    | plexin A3                                                                 | -0.155  | 0.0247 |
| 1567539_at   | SPAG10    | sperm associated antigen 10                                               | -0.1197 | 0.0406 |
| 1567540_at   | SPAG10    | sperm associated antigen 10                                               | -0.1494 | 0.0208 |
| 1567624_at   | TREML2P   | triggering receptor expressed on myeloid cells-like 2 pseudogene          | -0.1311 | 0.01   |
| 1567628_at   | CD74      | CD74 molecule; major histocompatibility complex; class II invariant chain | -2.1967 | 0.0051 |
| 1568190_at   |           |                                                                           | -0.2747 | 0      |
| 1568191_at   |           |                                                                           | -0.2333 | 0.0021 |
| 1568406_at   |           |                                                                           | -0.1919 | 0.0364 |
| 1568554_x_at | C6orf142  | Chromosome 6 open reading frame 142                                       | -0.1301 | 0.028  |
| 1568589_at   |           | Clone FLB3512 mRNA sequence                                               | -0.1561 | 0.0434 |
| 1568592_at   | TRIM69    | tripartite motif-containing 69                                            | -0.9387 | 0.0298 |
| 1568612_at   | GABRG2    | gamma-aminobutyric acid (GABA) A receptor; gamma 2                        | -0.4118 | 0.0344 |
| 1568613_at   | RSPH3     | radial spoke head 3 homolog (Chlamydomonas)                               | -0.271  | 0.02   |
| 1568616_a_at |           |                                                                           | -0.2773 | 0.0001 |
| 1568633_a_at |           | CDNA clone IMAGE:3878708                                                  | -0.6269 | 0.0034 |
| 1568663_a_at |           | CDNA clone IMAGE:5266772                                                  | -0.2979 | 0.0067 |
| 1568666_at   | LSDP5     | lipid storage droplet protein 5                                           | -0.1481 | 0.0016 |
| 1568675_at   | CHRNA10   | Cholinergic receptor; nicotinic; alpha 10                                 | -0.2328 | 0.0003 |
| 1568685_at   |           | Homo sapiens; clone IMAGE:4992489; mRNA                                   | -0.1986 | 0      |
| 1568718_at   | C6orf85   | chromosome 6 open reading frame 85                                        | -0.1016 | 0.0312 |
| 1568719_s_at | C6orf85   | chromosome 6 open reading frame 85                                        | -0.1784 | 0.0457 |
| 1568728_s_at | RNF207    | ring finger protein 207                                                   | -0.1915 | 0.0051 |
| 1568735_at   |           | CDNA clone IMAGE:4795078                                                  | -0.3412 | 0.0008 |
| 1568736_s_at |           | CDNA clone IMAGE:4795078                                                  | -0.9132 | 0.0002 |
| 1568739_at   | LOC285692 | hypothetical protein LOC285692                                            | -0.1741 | 0.0081 |
| 1568748_at   |           | Homo sapiens; clone IMAGE:5193340; mRNA                                   | -0.2585 | 0.0002 |
| 1568754_at   |           | CDNA clone IMAGE:5267015                                                  | -0.1482 | 0.0488 |
| 1568760_at   | MYH11     | myosin; heavy chain 11; smooth muscle                                     | -0.1414 | 0.007  |
| 1568768_s_at | BRE       | brain and reproductive organ-expressed (TNFRSF1A modulator)               | -4.7912 | 0      |
| 1568789_at   | C6orf107  | chromosome 6 open reading frame 107                                       | -0.1677 | 0.0001 |
| 1568796_at   | LOC550631 | hypothetical LOC550631                                                    | -0.1534 | 0.0208 |
| 1568821_at   | TTC23     | tetratricopeptide repeat domain 23                                        | -0.2264 | 0.001  |
| 1568830_at   | IRAK3     | Interleukin-1 receptor-associated kinase 3                                | -0.1514 | 0.0104 |
| 1568845_at   |           |                                                                           | -0.1223 | 0.0455 |

|              |             |                                                                   |         |        |
|--------------|-------------|-------------------------------------------------------------------|---------|--------|
| 1568850_at   | CCBP2       | Chemokine binding protein 2                                       | -0.1306 | 0.0142 |
| 1568859_a_at | SLC8A3      | solute carrier family 8 (sodium-calcium exchanger); member 3      | -0.1681 | 0.0201 |
| 1568902_at   |             | CDNA clone IMAGE:4914456; with apparent retained intron           | -0.139  | 0.0103 |
| 1568921_at   |             | CDNA clone IMAGE:5266271                                          | -0.1023 | 0.0186 |
| 1568943_at   | INPP5D      | inositol polyphosphate-5-phosphatase; 145kDa                      | -0.1891 | 0.0292 |
| 1568978_s_at | C11orf21    | chromosome 11 open reading frame 21                               | -0.1632 | 0.0404 |
| 1569020_at   | NEDD9       | neural precursor cell expressed; developmentally down-regulated 9 | -0.3183 | 0.0008 |
| 1569034_a_at | LOC440864   | hypothetical gene supported by BC040724                           | -0.1903 | 0.0017 |
| 1569063_at   |             | CDNA clone IMAGE:4106796                                          | -0.271  | 0.0063 |
| 1569076_a_at | FLJ16287    | FLJ16287 protein                                                  | -1.2233 | 0.0155 |
| 1569077_x_at | FLJ16287    | FLJ16287 protein                                                  | -1.3394 | 0.0122 |
| 1569095_at   | LOC731424   | hypothetical protein LOC731424                                    | -0.1761 | 0.0187 |
| 1569099_at   |             | Homo sapiens; clone IMAGE:4861097; mRNA                           | -0.1408 | 0.0217 |
| 1569153_at   |             | Homo sapiens; clone IMAGE:4551281; mRNA                           | -1.654  | 0      |
| 1569154_a_at |             | Homo sapiens; clone IMAGE:4551281; mRNA                           | -1.5558 | 0      |
| 1569159_at   | LZTS1       | Leucine zipper; putative tumor suppressor 1                       | -0.1077 | 0.013  |
| 1569171_a_at | FXR1        | Fragile X mental retardation; autosomal homolog 1                 | -0.1037 | 0.0047 |
| 1569193_at   |             | CDNA clone IMAGE:4821290                                          | -0.1282 | 0.0041 |
| 1569205_at   |             |                                                                   | -0.1327 | 0.0057 |
| 1569208_a_at |             | Homo sapiens; clone IMAGE:4704474; mRNA                           | -0.8225 | 0      |
| 1569235_a_at | LOC729303   | hypothetical protein LOC729303                                    | -0.1808 | 0.0263 |
| 1569257_at   | FMNL1       | formin-like 1                                                     | -0.2513 | 0.005  |
| 1569263_at   |             | Pp10472                                                           | -0.1158 | 0.0265 |
| 1569283_at   | hCG_1646157 | hCG1646157                                                        | -0.4601 | 0.0059 |
| 1569290_s_at | GRIA3       | glutamate receptor; ionotropic; AMPA 3                            | -1.5397 | 0.0303 |
| 1569300_at   | C1orf148    | chromosome 1 open reading frame 148                               | -0.1784 | 0.0099 |
| 1569303_s_at | RGS20       | regulator of G-protein signaling 20                               | -0.1711 | 0.0014 |
| 1569305_a_at |             | Homo sapiens; clone IMAGE:5184855; mRNA                           | -0.1651 | 0.0026 |
| 1569325_at   | ARPC5       | Actin related protein 2/3 complex; subunit 5; 16kDa               | -0.1812 | 0.0255 |
| 1569337_at   | SLC5A9      | solute carrier family 5 (sodium/glucose cotransporter); member 9  | -0.1498 | 0.0013 |
| 1569378_at   | FLJ33297    | Hypothetical gene supported by AK090616                           | -0.1148 | 0.0059 |
| 1569393_at   | MGC15885    | hypothetical protein MGC15885                                     | -0.1032 | 0.0231 |
| 1569401_at   | CLEC12A     | C-type lectin domain family 12; member A                          | -0.1227 | 0.0334 |
| 1569421_at   | CLDN4       | claudin 4                                                         | -0.1167 | 0.0109 |

|              |               |                                                                     |         |        |
|--------------|---------------|---------------------------------------------------------------------|---------|--------|
| 1569434_at   | C14orf105     | chromosome 14 open reading frame 105                                | -0.1558 | 0.0288 |
| 1569459_a_at |               | Homo sapiens; clone IMAGE:5191120; mRNA                             | -0.1342 | 0.0211 |
| 1569465_at   | LOC729830     | similar to CG3558-PA; isoform A                                     | -0.2083 | 0.0091 |
| 1569473_s_at | LOC791120     | hypothetical LOC791120, zinc finger protein 783                     | -0.1192 | 0.021  |
| 1569487_at   | TACC3         | Transforming; acidic coiled-coil containing protein 3               | -0.1094 | 0.0068 |
| 1569496_s_at | SPON2         | Spondin 2; extracellular matrix protein                             | -0.2615 | 0.0023 |
| 1569516_at   |               | Homo sapiens; clone IMAGE:5585187; mRNA                             | -0.2163 | 0.0002 |
| 1569518_at   |               | Homo sapiens; clone IMAGE:4153775; mRNA                             | -0.1959 | 0.0022 |
| 1569523_a_at |               | Homo sapiens; clone IMAGE:4424208; mRNA                             | -0.1241 | 0.0154 |
| 1569536_at   | FLVCR2        | feline leukemia virus subgroup C cellular receptor family; member 2 | -0.4458 | 0      |
| 1569615_at   |               | Homo sapiens; clone IMAGE:5163959; mRNA                             | -0.1144 | 0.036  |
| 1569631_at   | NMNAT1        | nicotinamide nucleotide adenyltransferase 1                         | -0.4189 | 0.0066 |
| 1569644_at   |               | Homo sapiens; clone IMAGE:4708652; mRNA                             | -0.1347 | 0.0277 |
| 1569647_at   | LOC643623     | hypothetical LOC643623                                              | -0.192  | 0.0001 |
| 1569670_at   |               | Pp12613                                                             | -0.181  | 0.0006 |
| 1569683_at   | XYLB          | xylulokinase homolog (H. influenzae)                                | -0.2186 | 0.0024 |
| 1569722_s_at | LOC219731     | hypothetical protein LOC219731                                      | -0.1461 | 0.0301 |
| 1569730_at   | FLJ40243      | hypothetical protein FLJ40243                                       | -0.1936 | 0.0056 |
| 1569741_at   |               | CDNA clone IMAGE:4831311                                            | -0.1865 | 0.0057 |
| 1569763_at   |               | CDNA clone IMAGE:4823272                                            | -0.2134 | 0      |
| 1569785_at   |               | CDNA clone IMAGE:5287047                                            | -0.3577 | 0      |
| 1569793_at   | SLC25A18      | solute carrier family 25 (mitochondrial carrier); member 18         | -0.3392 | 0.0015 |
| 1569817_at   |               | CDNA clone IMAGE:4827374                                            | -0.1429 | 0.019  |
| 1569840_at   |               | Homo sapiens; Similar to HSPC182 protein; clone IMAGE:4431648; mRNA | -0.1172 | 0.0385 |
| 1569847_at   | CGNL1         | Cingulin-like 1                                                     | -0.1703 | 0.0092 |
| 1569887_a_at | LOC286135     | hypothetical protein LOC286135                                      | -0.1282 | 0.0149 |
| 1569905_at   | HSD11B1L      | hydroxysteroid (11-beta) dehydrogenase 1-like                       | -0.212  | 0.0078 |
| 1569909_at   | KRT79         | keratin 79                                                          | -0.1524 | 0.0148 |
| 1569910_at   |               | CDNA clone IMAGE:5095848                                            | -0.1313 | 0.0229 |
| 1569926_s_at | SLC34A3       | solute carrier family 34 (sodium phosphate); member 3               | -0.1068 | 0.0226 |
| 1569932_at   | RP11-262D11.5 | similar to Nance-Horan syndrome protein                             | -0.1887 | 0.002  |
| 1569933_at   |               | CDNA clone IMAGE:4547814                                            | -0.1509 | 0.0226 |
| 1569937_at   |               | CDNA clone IMAGE:4799216                                            | -0.1514 | 0.0042 |
| 1569953_at   |               | CDNA clone IMAGE:4310445                                            | -0.1105 | 0.0019 |
| 1569956_at   |               | Homo sapiens; clone IMAGE:4413783; mRNA                             | -0.1648 | 0.0005 |



|              |           |                                                                                   |         |        |
|--------------|-----------|-----------------------------------------------------------------------------------|---------|--------|
| 1569963_at   |           | Homo sapiens; clone IMAGE:4662750; mRNA                                           | -0.2048 | 0.0033 |
| 1569979_at   | HKR1      | GLI-Kruppel family member HKR1                                                    | -0.3089 | 0      |
| 1569980_x_at | HKR1      | GLI-Kruppel family member HKR1                                                    | -0.1409 | 0.0024 |
| 1569991_at   | KY        | kyphoscoliosis peptidase                                                          | -0.1654 | 0.0156 |
| 1569998_at   | MMD2      | monocyte to macrophage differentiation-associated 2                               | -0.1231 | 0.0344 |
| 1570038_at   | ZNF718    | Zinc finger protein 718                                                           | -0.1011 | 0.0493 |
| 1570040_at   |           | CDNA clone IMAGE:5267944                                                          | -0.179  | 0.0018 |
| 1570065_at   |           | Homo sapiens; clone IMAGE:4340753; mRNA                                           | -0.1327 | 0.0378 |
| 1570082_x_at |           | CDNA clone IMAGE:4825288                                                          | -0.2008 | 0.0147 |
| 1570105_at   |           | Homo sapiens; clone IMAGE:4638342; mRNA                                           | -0.1986 | 0      |
| 1570116_at   |           | CDNA clone IMAGE:3343139                                                          | -0.1538 | 0.0024 |
| 1570121_at   | ZNF365    | zinc finger protein 365                                                           | -0.1652 | 0.0005 |
| 1570123_at   |           | CDNA clone IMAGE:4123798                                                          | -0.1838 | 0.0019 |
| 1570140_at   | LOC653110 | hypothetical LOC653110                                                            | -0.1424 | 0.0113 |
| 1570167_at   |           | Homo sapiens; clone IMAGE:4214536; mRNA                                           | -0.1119 | 0.0258 |
| 1570171_at   |           | CDNA clone IMAGE:5200896                                                          | -0.1333 | 0.0176 |
| 1570186_at   | GRASPOS   | GRP1-associated scaffold protein opposite strand                                  | -0.1378 | 0.0053 |
| 1570225_at   | LOC284417 | hCG1651476                                                                        | -0.1487 | 0.0012 |
| 1570235_at   | MGC27382  | hypothetical protein MGC27382                                                     | -0.13   | 0.0307 |
| 1570238_at   | ZNF527    | zinc finger protein 527                                                           | -0.1196 | 0.0401 |
| 1570239_a_at | MIST      | mast cell immunoreceptor signal transducer                                        | -0.1841 | 0.0255 |
| 1570259_at   | LIMS1     | LIM and senescent cell antigen-like domains 1                                     | -1.2556 | 0.001  |
| 1570266_x_at |           | Homo sapiens; Similar to otoconin 90; clone IMAGE:4044247; mRNA                   | -0.3038 | 0.0214 |
| 1570274_at   | UNQ9391   | tryptophan/serine protease                                                        | -0.1311 | 0.0392 |
| 1570279_at   | ABCA1     | ATP-binding cassette; sub-family A (ABC1); member 1                               | -0.1907 | 0.0343 |
| 1570281_at   |           | CDNA clone IMAGE:5312241                                                          | -0.2232 | 0.003  |
| 1570282_at   |           |                                                                                   | -0.1303 | 0.0042 |
| 1570302_at   |           | Homo sapiens; clone IMAGE:4178694; mRNA                                           | -0.1072 | 0.0378 |
| 1570315_at   | LOC283902 | hypothetical gene supported by BC019009                                           | -0.1118 | 0.0136 |
| 1570330_at   |           | Homo sapiens; clone IMAGE:4151631; mRNA                                           | -0.2729 | 0.0008 |
| 1570344_at   |           | CDNA clone IMAGE:4838056                                                          | -0.1864 | 0.0215 |
| 1570350_at   |           | Homo sapiens; Similar to hypothetical protein FLJ20234; clone IMAGE:5210552; mRNA | -0.1393 | 0.0095 |
| 1570364_at   | ZNF709    | zinc finger protein 709                                                           | -0.2359 | 0.03   |
| 1570382_at   |           |                                                                                   | -0.1726 | 0.0002 |
| 1570385_at   |           | Homo sapiens; clone IMAGE:4040324; mRNA                                           | -0.1553 | 0.0017 |
| 1570405_at   |           | Homo sapiens; clone IMAGE:4543009; mRNA                                           | -0.2121 | 0.0044 |

|              |           |                                                                                                                                     |         |        |
|--------------|-----------|-------------------------------------------------------------------------------------------------------------------------------------|---------|--------|
| 1570470_at   | C14orf161 | chromosome 14 open reading frame 161                                                                                                | -0.1043 | 0.0226 |
| 1570474_s_at | LOC338579 | hypothetical protein LOC338579                                                                                                      | -0.1455 | 0.031  |
| 1570506_at   |           | Homo sapiens; clone IMAGE:4093039; mRNA                                                                                             | -0.3911 | 0.0006 |
| 1570511_at   | ARHGEF10L | Rho guanine nucleotide exchange factor (GEF) 10-like                                                                                | -0.4309 | 0.0001 |
| 1570536_at   |           |                                                                                                                                     | -0.1111 | 0.0142 |
| 1570546_a_at | TACC2     | transforming; acidic coiled-coil containing protein 2                                                                               | -0.1366 | 0.0018 |
| 1570552_at   | C18orf50  | chromosome 18 open reading frame 50                                                                                                 | -0.9678 | 0.0001 |
| 1570569_at   |           |                                                                                                                                     | -0.2474 | 0.0002 |
| 1570601_at   |           | CDNA clone IMAGE:4213015                                                                                                            | -0.1439 | 0.0162 |
| 1570627_at   | TCEB3     | transcription elongation factor B (SIII); polypeptide 3 (110kDa; elongin A)                                                         | -0.1094 | 0.0439 |
| 1570630_at   |           | CDNA clone IMAGE:4826992                                                                                                            | -0.1893 | 0.0091 |
| 1598_g_at    | GAS6      | growth arrest-specific 6                                                                                                            | -1.4818 | 0.0001 |
| 177_at       | PLD1      | phospholipase D1; phosphatidylcholine-specific                                                                                      | -1.0824 | 0      |
| 179_at       | PMS2L11   | postmeiotic segregation increased 2-like 11                                                                                         | -0.1827 | 0.0388 |
| 200000_s_at  | PRPF8     | PRP8 pre-mRNA processing factor 8 homolog ( <i>S. cerevisiae</i> )                                                                  | -0.7586 | 0      |
| 200006_at    | PARK7     | Parkinson disease (autosomal recessive; early onset) 7                                                                              | -0.3237 | 0.0002 |
| 200010_at    | RPL11     | ribosomal protein L11                                                                                                               | -0.2398 | 0.027  |
| 200012_x_at  | LOC653737 | 60S ribosomal protein L21 pseudogene, ribosomal protein L21, similar to 60S ribosomal protein L21, similar to ribosomal protein L21 | -0.3996 | 0.0006 |
| 200013_at    | RPL24     | ribosomal protein L24                                                                                                               | -0.1918 | 0.0195 |
| 200017_at    | RPS27A    | ribosomal protein S27a                                                                                                              | -0.2095 | 0.0015 |
| 200018_at    | RPS13     | ribosomal protein S13                                                                                                               | -0.1822 | 0.0041 |
| 200019_s_at  | FAU       | Finkel-Biskis-Reilly murine sarcoma virus (FBR-MuSV) ubiquitously expressed                                                         | -0.4717 | 0.0002 |
| 200023_s_at  | EIF3F     | eukaryotic translation initiation factor 3; subunit F                                                                               | -0.482  | 0.008  |
| 200025_s_at  | RPL27     | ribosomal protein L27                                                                                                               | -0.1797 | 0.0024 |
| 200026_at    | LOC342994 | hypothetical protein LOC729536, ribosomal protein L34, similar to ribosomal protein L34                                             | -0.154  | 0.0016 |
| 200029_at    | LOC392557 | ribosomal protein L19, similar to ribosomal protein L19                                                                             | -0.2384 | 0.0025 |
| 200033_at    | DDX5      | DEAD (Asp-Glu-Ala-Asp) box polypeptide 5                                                                                            | -0.299  | 0.0036 |
| 200035_at    | DULLARD   | dullard homolog ( <i>Xenopus laevis</i> )                                                                                           | -0.2949 | 0.0291 |
| 200036_s_at  | RPL10A    | ribosomal protein L10a                                                                                                              | -0.3689 | 0.0051 |
| 200038_s_at  | C18orf32  | chromosome 18 open reading frame 32, hCG22804, hCG39912, ribosomal protein L17                                                      | -0.2273 | 0.0131 |
| 200042_at    | C22orf28  | chromosome 22 open reading frame 28                                                                                                 | -0.4287 | 0.033  |

|             |           |                                                                                                                        |         |        |
|-------------|-----------|------------------------------------------------------------------------------------------------------------------------|---------|--------|
| 200048_s_at | JTB       | jumping translocation breakpoint                                                                                       | -0.2391 | 0.0268 |
| 200055_at   | TAF10     | TAF10 RNA polymerase II; TATA box binding protein (TBP)-associated factor; 30kDa                                       | -0.7108 | 0.0006 |
| 200056_s_at | C1D       | nuclear DNA-binding protein, similar to nuclear DNA-binding protein                                                    | -0.3317 | 0.0276 |
| 200061_s_at | RPS24     | ribosomal protein S24                                                                                                  | -0.1423 | 0.0252 |
| 200070_at   | C2orf24   | chromosome 2 open reading frame 24                                                                                     | -0.8424 | 0.0004 |
| 200074_s_at | LOC649821 | ribosomal protein L14, ribosomal protein L14-like, similar to 60S ribosomal protein L14 (CAG-ISL 7)                    | -0.2602 | 0.0176 |
| 200075_s_at | GUK1      | guanylate kinase 1                                                                                                     | -0.5282 | 0.0039 |
| 200081_s_at | RPS6      | ribosomal protein S6                                                                                                   | -0.2484 | 0.0484 |
| 200084_at   | C11orf58  | chromosome 11 open reading frame 58                                                                                    | -0.2779 | 0.0149 |
| 200088_x_at | RPL12     | ribosomal protein L12                                                                                                  | -0.2055 | 0.0261 |
| 200091_s_at | RPS25     | ribosomal protein S25                                                                                                  | -0.2746 | 0.0003 |
| 200095_x_at | RPS10     | ribosomal protein S10                                                                                                  | -0.1469 | 0.0191 |
| 200614_at   | CLTC      | clathrin; heavy chain (Hc)                                                                                             | -0.1977 | 0.0241 |
| 200620_at   | TMEM59    | transmembrane protein 59                                                                                               | -0.342  | 0.0163 |
| 200621_at   | CSRP1     | cysteine and glycine-rich protein 1                                                                                    | -2.6839 | 0      |
| 200642_at   | SOD1      | superoxide dismutase 1; soluble (amyotrophic lateral sclerosis 1 (adult))                                              | -0.2015 | 0.0336 |
| 200645_at   | GABARAP   | GABA(A) receptor-associated protein                                                                                    | -0.3061 | 0.0003 |
| 200648_s_at | GLUL      | glutamate-ammonia ligase (glutamine synthetase)                                                                        | -0.9416 | 0.0446 |
| 200652_at   | SSR2      | signal sequence receptor; beta (translocon-associated protein beta)                                                    | -0.5263 | 0.0031 |
| 200654_at   | P4HB      | procollagen-proline; 2-oxoglutarate 4-dioxygenase (proline 4-hydroxylase); beta polypeptide                            | -0.203  | 0.0362 |
| 200659_s_at | PHB       | prohibitin                                                                                                             | -0.3642 | 0.0498 |
| 200668_s_at | UBE2D2    | ubiquitin-conjugating enzyme E2D 2 (UBC4/5 homolog; yeast), ubiquitin-conjugating enzyme E2D 3 (UBC4/5 homolog; yeast) | -0.2189 | 0.0301 |
| 200670_at   | XBP1      | X-box binding protein 1                                                                                                | -1.6696 | 0.0002 |
| 200672_x_at | SPTBN1    | spectrin; beta; non-erythrocytic 1                                                                                     | -1.4178 | 0.0127 |
| 200674_s_at | RPL32     | ribosomal protein L32                                                                                                  | -0.1636 | 0.0204 |
| 200676_s_at | UBE2L3    | ubiquitin-conjugating enzyme E2L 3                                                                                     | -0.692  | 0.0092 |
| 200685_at   | SFRS11    | splicing factor; arginine/serine-rich 11                                                                               | -0.73   | 0.0349 |
| 200696_s_at | GSN       | gelsolin (amyloidosis; Finnish type)                                                                                   | -0.5516 | 0.0464 |
| 200705_s_at | EEF1B2    | eukaryotic translation elongation factor 1 beta 2, eukaryotic translation elongation factor 1 beta 2-like, hCG1983058  | -0.3311 | 0.0147 |
| 200710_at   | ACADVL    | acyl-Coenzyme A dehydrogenase; very long chain                                                                         | -1.0009 | 0      |
| 200715_x_at | RPL13A    | ribosomal protein L13a                                                                                                 | -0.3048 | 0.011  |
| 200724_at   | RPL10     | ribosomal protein L10                                                                                                  | -0.1531 | 0.0298 |

|             |         |                                                                                                         |         |        |
|-------------|---------|---------------------------------------------------------------------------------------------------------|---------|--------|
| 200725_x_at | RPL10   | ribosomal protein L10                                                                                   | -0.1645 | 0.0254 |
| 200730_s_at | PTP4A1  | protein tyrosine phosphatase type IVA; member 1                                                         | -0.9957 | 0.021  |
| 200731_s_at | PTP4A1  | protein tyrosine phosphatase type IVA; member 1                                                         | -0.8061 | 0.0088 |
| 200732_s_at | PTP4A1  | protein tyrosine phosphatase type IVA; member 1                                                         | -0.8671 | 0.0007 |
| 200733_s_at | PTP4A1  | protein tyrosine phosphatase type IVA; member 1                                                         | -0.5526 | 0.0248 |
| 200736_s_at | GPX1    | glutathione peroxidase 1                                                                                | -0.5777 | 0.0076 |
| 200741_s_at | RPS27   | ribosomal protein S27 (metalloprotein 1)                                                                | -0.2078 | 0.0006 |
| 200742_s_at | TPP1    | tripeptidyl peptidase I                                                                                 | -0.7973 | 0.0282 |
| 200743_s_at | TPP1    | tripeptidyl peptidase I                                                                                 | -0.5117 | 0.0253 |
| 200747_s_at | NUMA1   | nuclear mitotic apparatus protein 1                                                                     | -0.5568 | 0.0421 |
| 200748_s_at | FTH1    | ferritin; heavy polypeptide 1, ferritin; heavy polypeptide-like 11, ferritin; heavy polypeptide-like 16 | -0.452  | 0.0079 |
| 200752_s_at | CAPN1   | calpain 1; (mu/l) large subunit                                                                         | -0.5279 | 0.0374 |
| 200753_x_at | SFRS2   | splicing factor; arginine/serine-rich 2                                                                 | -0.4751 | 0.031  |
| 200761_s_at | ARL6IP5 | ADP-ribosylation-like factor 6 interacting protein 5                                                    | -0.3941 | 0.0255 |
| 200762_at   | DPYSL2  | dihydropyrimidinase-like 2                                                                              | -0.8062 | 0.0041 |
| 200766_at   | CTSD    | cathepsin D                                                                                             | -0.6744 | 0.0317 |
| 200768_s_at | MAT2A   | methionine adenosyltransferase II; alpha                                                                | -0.8065 | 0      |
| 200776_s_at | BZW1    | basic leucine zipper and W2 domains 1, similar to basic leucine zipper and W2 domains 1                 | -0.8211 | 0.0027 |
| 200777_s_at | BZW1    | basic leucine zipper and W2 domains 1, similar to basic leucine zipper and W2 domains 1                 | -0.5157 | 0      |
| 200784_s_at | LRP1    | low density lipoprotein-related protein 1 (alpha-2-macroglobulin receptor)                              | -0.4443 | 0.007  |
| 200785_s_at | LRP1    | low density lipoprotein-related protein 1 (alpha-2-macroglobulin receptor)                              | -1.1563 | 0.0003 |
| 200792_at   | XRCC6   | X-ray repair complementing defective repair in Chinese hamster cells 6 (Ku autoantigen; 70kDa)          | -0.6096 | 0.0035 |
| 200797_s_at | MCL1    | myeloid cell leukemia sequence 1 (BCL2-related)                                                         | -0.4634 | 0.0102 |
| 200798_x_at | MCL1    | myeloid cell leukemia sequence 1 (BCL2-related)                                                         | -0.9196 | 0.0051 |
| 200807_s_at | HSPD1   | heat shock 60kDa protein 1 (chaperonin)                                                                 | -0.1493 | 0.0377 |
| 200809_x_at | RPL12   | ribosomal protein L12                                                                                   | -0.2022 | 0.0211 |
| 200817_x_at | RPS10   | ribosomal protein S10                                                                                   | -0.193  | 0.0069 |
| 200823_x_at | RPL29   | ribosomal protein L29                                                                                   | -0.2542 | 0.0105 |
| 200824_at   | GSTP1   | glutathione S-transferase pi                                                                            | -2.1568 | 0.0004 |
| 200830_at   | PSMD2   | proteasome (prosome; macropain) 26S subunit; non-ATPase; 2                                              | -0.269  | 0.0089 |
| 200845_s_at | PRDX6   | peroxiredoxin 6                                                                                         | -0.3902 | 0.0112 |
| 200848_at   | AHCYL1  | S-adenosylhomocysteine hydrolase-like 1                                                                 | -0.8998 | 0      |

|             |           |                                                                                        |         |        |
|-------------|-----------|----------------------------------------------------------------------------------------|---------|--------|
| 200849_s_at | AHCYL1    | S-adenosylhomocysteine hydrolase-like 1                                                | -0.8901 | 0      |
| 200850_s_at | AHCYL1    | S-adenosylhomocysteine hydrolase-like 1                                                | -0.5938 | 0      |
| 200854_at   | NCOR1     | nuclear receptor co-repressor 1                                                        | -0.5714 | 0.0012 |
| 200856_x_at | C20orf191 | chromosome 20 open reading frame 191, nuclear receptor co-repressor 1                  | -0.6038 | 0.0023 |
| 200858_s_at | RPS8      | ribosomal protein S8                                                                   | -0.2392 | 0.0075 |
| 200862_at   | DHCR24    | 24-dehydrocholesterol reductase                                                        | -0.728  | 0.0031 |
| 200872_at   | S100A10   | S100 calcium binding protein A10                                                       | -1.0711 | 0.0302 |
| 200878_at   | EPAS1     | endothelial PAS domain protein 1                                                       | -1.4351 | 0.0002 |
| 200881_s_at | DNAJA1    | DnaJ (Hsp40) homolog; subfamily A; member 1                                            | -0.4696 | 0.019  |
| 200884_at   | CKB       | creatine kinase; brain                                                                 | -2.0099 | 0      |
| 200888_s_at | RPL23     | ribosomal protein L23                                                                  | -0.2231 | 0.0103 |
| 200893_at   | SFRS10    | splicing factor; arginine/serine-rich 10 (transformer 2 homolog; Drosophila)           | -0.252  | 0.0011 |
| 200897_s_at | PALLD     | palladin; cytoskeletal associated protein                                              | -1.8377 | 0.0027 |
| 200902_at   | 15-Sep    | 15 kDa selenoprotein                                                                   | -0.338  | 0.0242 |
| 200904_at   | HLA-E     | major histocompatibility complex; class I; E                                           | -0.8829 | 0.0223 |
| 200906_s_at | PALLD     | palladin; cytoskeletal associated protein                                              | -1.1275 | 0.0174 |
| 200907_s_at | PALLD     | palladin; cytoskeletal associated protein                                              | -2.1618 | 0.0039 |
| 200908_s_at | RPLP2     | ribosomal protein; large; P2                                                           | -0.2254 | 0.0004 |
| 200909_s_at | RPLP2     | ribosomal protein; large; P2                                                           | -0.2572 | 0.0134 |
| 200918_s_at | SRPR      | signal recognition particle receptor ('docking protein')                               | -0.4713 | 0.0186 |
| 200919_at   | PHC2      | polyhomeotic homolog 2 (Drosophila)                                                    | -1.162  | 0      |
| 200937_s_at | RPL5      | ribosomal protein L5                                                                   | -0.3836 | 0.0013 |
| 200938_s_at | RERE      | arginine-glutamic acid dipeptide (RE) repeats                                          | -0.1991 | 0.0113 |
| 200940_s_at | RERE      | arginine-glutamic acid dipeptide (RE) repeats                                          | -0.9757 | 0.0013 |
| 200946_x_at | GLUD1     | glutamate dehydrogenase 1                                                              | -1.082  | 0.0002 |
| 200947_s_at | GLUD1     | glutamate dehydrogenase 1                                                              | -0.9863 | 0      |
| 200963_x_at | RPL31     | ribosomal protein L31                                                                  | -0.1589 | 0.0268 |
| 200965_s_at | ABLIM1    | actin binding LIM protein 1                                                            | -3.6306 | 0      |
| 200969_at   | SERP1     | stress-associated endoplasmic reticulum protein 1                                      | -0.4031 | 0.0389 |
| 200970_s_at | SERP1     | stress-associated endoplasmic reticulum protein 1                                      | -0.5106 | 0.0021 |
| 200971_s_at | SERP1     | stress-associated endoplasmic reticulum protein 1                                      | -0.5698 | 0.0002 |
| 200986_at   | SERPING1  | serpin peptidase inhibitor; clade G (C1 inhibitor); member 1; (angioedema; hereditary) | -3.4558 | 0      |
| 200991_s_at | SNX17     | sorting nexin 17                                                                       | -0.4729 | 0.0148 |
| 200994_at   | IPO7      | Importin 7                                                                             | -0.3289 | 0.0159 |

|             |          |                                                                                                                                      |         |        |
|-------------|----------|--------------------------------------------------------------------------------------------------------------------------------------|---------|--------|
| 200995_at   | IPO7     | Importin 7                                                                                                                           | -0.3398 | 0.0465 |
| 201005_at   | CD9      | CD9 molecule                                                                                                                         | -1.0389 | 0.0274 |
| 201007_at   | HADHB    | hydroxyacyl-Coenzyme A dehydrogenase/3-ketoacyl-Coenzyme A thiolase/enoyl-Coenzyme A hydratase (trifunctional protein); beta subunit | -0.5285 | 0      |
| 201015_s_at | JUP      | junction plakoglobin                                                                                                                 | -0.815  | 0.0055 |
| 201041_s_at | DUSP1    | dual specificity phosphatase 1                                                                                                       | -0.8361 | 0      |
| 201044_x_at | DUSP1    | dual specificity phosphatase 1                                                                                                       | -2.0201 | 0.0001 |
| 201056_at   | GOLGB1   | golgin B1; golgi integral membrane protein                                                                                           | -0.5614 | 0.0094 |
| 201059_at   | CTTN     | cortactin                                                                                                                            | -0.6693 | 0.0001 |
| 201069_at   | MMP2     | matrix metalloproteinase 2 (gelatinase A; 72kDa gelatinase; 72kDa type IV collagenase)                                               | -4.2588 | 0      |
| 201076_at   | NHP2L1   | NHP2 non-histone chromosome protein 2-like 1 (S. cerevisiae)                                                                         | -1.0461 | 0      |
| 201077_s_at | NHP2L1   | NHP2 non-histone chromosome protein 2-like 1 (S. cerevisiae)                                                                         | -0.9382 | 0      |
| 201080_at   | PIP4K2B  | phosphatidylinositol-5-phosphate 4-kinase; type II; beta                                                                             | -0.6057 | 0.002  |
| 201092_at   | RBBP7    | retinoblastoma binding protein 7                                                                                                     | -0.4932 | 0.0022 |
| 201094_at   | RPS29    | ribosomal protein S29                                                                                                                | -0.2406 | 0.0066 |
| 201106_at   | GPX4     | glutathione peroxidase 4 (phospholipid hydroperoxidase)                                                                              | -0.3398 | 0.0119 |
| 201107_s_at | THBS1    | thrombospondin 1                                                                                                                     | -0.2649 | 0      |
| 201108_s_at | THBS1    | thrombospondin 1                                                                                                                     | -1.734  | 0      |
| 201109_s_at | THBS1    | thrombospondin 1                                                                                                                     | -3.2646 | 0      |
| 201110_s_at | THBS1    | thrombospondin 1                                                                                                                     | -2.9702 | 0      |
| 201116_s_at | CPE      | carboxypeptidase E                                                                                                                   | -2.0244 | 0.0003 |
| 201117_s_at | CPE      | carboxypeptidase E                                                                                                                   | -2.1288 | 0      |
| 201135_at   | ECHS1    | enoyl Coenzyme A hydratase; short chain; 1; mitochondrial                                                                            | -0.3314 | 0.0433 |
| 201137_s_at | HLA-DPB1 | major histocompatibility complex; class II; DP beta 1                                                                                | -2.0011 | 0.0029 |
| 201146_at   | NFE2L2   | nuclear factor (erythroid-derived 2)-like 2                                                                                          | -0.3088 | 0.0429 |
| 201150_s_at | TIMP3    | TIMP metalloproteinase inhibitor 3 (Sorsby fundus dystrophy; pseudoinflammatory)                                                     | -1.4615 | 0.0064 |
| 201153_s_at | MBNL1    | muscleblind-like (Drosophila)                                                                                                        | -0.3079 | 0.0216 |
| 201160_s_at | CSDA     | cold shock domain protein A                                                                                                          | -0.4835 | 0.0029 |
| 201173_x_at | NUDC     | nuclear distribution gene C homolog (A. nidulans)                                                                                    | -0.5683 | 0.0016 |
| 201175_at   | TXNDC14  | thioredoxin domain containing 14                                                                                                     | -0.4731 | 0.0159 |
| 201178_at   | FBXO7    | F-box protein 7                                                                                                                      | -0.538  | 0.0044 |
| 201190_s_at | PITPNA   | phosphatidylinositol transfer protein; alpha                                                                                         | -0.5511 | 0.0002 |
| 201191_at   | PITPNA   | phosphatidylinositol transfer protein; alpha                                                                                         | -0.7681 | 0.0002 |
| 201193_at   | IDH1     | isocitrate dehydrogenase 1 (NADP+); soluble                                                                                          | -0.6736 | 0.0007 |

|             |           |                                                                                                                     |         |        |
|-------------|-----------|---------------------------------------------------------------------------------------------------------------------|---------|--------|
| 201200_at   | CREG1     | cellular repressor of E1A-stimulated genes 1                                                                        | -1.2008 | 0      |
| 201217_x_at | RPL3      | ribosomal protein L3                                                                                                | -0.1963 | 0.0062 |
| 201219_at   | CTBP2     | C-terminal binding protein 2                                                                                        | -0.6275 | 0.0369 |
| 201225_s_at | SRRM1     | serine/arginine repetitive matrix 1                                                                                 | -0.4046 | 0.0023 |
| 201232_s_at | PSMD13    | proteasome (prosome; macropain) 26S subunit; non-ATPase; 13                                                         | -0.4231 | 0.0476 |
| 201234_at   | ILK       | integrin-linked kinase                                                                                              | -0.7059 | 0.0012 |
| 201235_s_at | BTG2      | BTG family; member 2                                                                                                | -1.1634 | 0.0001 |
| 201236_s_at | BTG2      | BTG family; member 2                                                                                                | -2.7235 | 0      |
| 201239_s_at | LOC653566 | signal peptidase complex subunit 2 homolog (S. cerevisiae), signal peptidase complex subunit 2 homolog pseudogene   | -0.4271 | 0.0364 |
| 201240_s_at | SPCS2     | signal peptidase complex subunit 2 homolog (S. cerevisiae)                                                          | -0.3218 | 0.0031 |
| 201241_at   | DDX1      | DEAD (Asp-Glu-Ala-Asp) box polypeptide 1                                                                            | -0.3441 | 0.023  |
| 201254_x_at | RPS6      | ribosomal protein S6                                                                                                | -0.2106 | 0.014  |
| 201255_x_at | BAT3      | HLA-B associated transcript 3                                                                                       | -0.3132 | 0.031  |
| 201256_at   | COX7A2L   | cytochrome c oxidase subunit VIIa polypeptide 2 like                                                                | -0.2481 | 0.0202 |
| 201261_x_at | BGN       | biglycan                                                                                                            | -1.0101 | 0.011  |
| 201272_at   | AKR1B1    | aldo-keto reductase family 1; member B1 (aldose reductase)                                                          | -0.8727 | 0.0002 |
| 201288_at   | ARHGDI1B  | Rho GDP dissociation inhibitor (GDI) beta                                                                           | -1.0147 | 0.0015 |
| 201289_at   | CYR61     | cysteine-rich; angiogenic inducer; 61                                                                               | -2.5734 | 0.0001 |
| 201290_at   | SEC11A    | SEC11 homolog A (S. cerevisiae)                                                                                     | -0.2487 | 0.0137 |
| 201300_s_at | PRNP      | prion protein (p27-30) (Creutzfeldt-Jakob disease; Gerstmann-Strausler-Scheinker syndrome; fatal familial insomnia) | -0.6641 | 0.0489 |
| 201303_at   | EIF4A3    | eukaryotic translation initiation factor 4A; isoform 3                                                              | -1.2708 | 0      |
| 201315_x_at | IFITM2    | interferon induced transmembrane protein 2 (1-8D)                                                                   | -0.9118 | 0.0006 |
| 201318_s_at | MRCL3     | myosin regulatory light chain MRCL3, myosin regulatory light chain MRCL2                                            | -0.2171 | 0.0425 |
| 201319_at   | LOC645094 | myosin regulatory light chain MRCL3, similar to myosin regulatory light chain-like                                  | -0.3121 | 0.0138 |
| 201324_at   | EMP1      | epithelial membrane protein 1                                                                                       | -1.9902 | 0.0003 |
| 201325_s_at | EMP1      | epithelial membrane protein 1                                                                                       | -1.497  | 0.0002 |
| 201328_at   | ETS2      | v-ets erythroblastosis virus E26 oncogene homolog 2 (avian)                                                         | -1.6994 | 0.0002 |
| 201329_s_at | ETS2      | v-ets erythroblastosis virus E26 oncogene homolog 2 (avian)                                                         | -0.8299 | 0.001  |
| 201334_s_at | ARHGEF12  | Rho guanine nucleotide exchange factor (GEF) 12                                                                     | -0.5399 | 0.0002 |
| 201336_at   | VAMP3     | vesicle-associated membrane protein 3 (cellubrevin)                                                                 | -0.2827 | 0.0053 |
| 201338_x_at | GTF3A     | general transcription factor IIIA                                                                                   | -0.5589 | 0.0179 |
| 201339_s_at | SCP2      | sterol carrier protein 2                                                                                            | -0.5079 | 0.0276 |

|             |           |                                                                                     |         |        |
|-------------|-----------|-------------------------------------------------------------------------------------|---------|--------|
| 201347_x_at | GRHPR     | glyoxylate reductase/hydroxypyruvate reductase                                      | -0.663  | 0.0153 |
| 201348_at   | GPX3      | glutathione peroxidase 3 (plasma)                                                   | -2.5368 | 0.0002 |
| 201349_at   | SLC9A3R1  | solute carrier family 9 (sodium/hydrogen exchanger); member 3 regulator 1           | -2.5392 | 0.0001 |
| 201356_at   | SF3A1     | splicing factor 3a; subunit 1; 120kDa                                               | -0.5864 | 0.038  |
| 201367_s_at | ZFP36L2   | zinc finger protein 36; C3H type-like 2                                             | -0.9818 | 0.0144 |
| 201368_at   | ZFP36L2   | zinc finger protein 36; C3H type-like 2                                             | -1.0946 | 0      |
| 201369_s_at | ZFP36L2   | zinc finger protein 36; C3H type-like 2                                             | -1.6946 | 0.0001 |
| 201382_at   | CACYBP    | calcyclin binding protein                                                           | -0.2248 | 0.0218 |
| 201384_s_at | LOC727732 | neighbor of BRCA1 gene 1, similar to neighbor of BRCA1 gene 1                       | -0.4184 | 0.0009 |
| 201400_at   | PSMB3     | proteasome (prosome; macropain) subunit; beta type; 3                               | -0.4055 | 0.0005 |
| 201407_s_at | PPP1CB    | protein phosphatase 1; catalytic subunit; beta isoform                              | -0.3851 | 0.0073 |
| 201408_at   | PPP1CB    | protein phosphatase 1; catalytic subunit; beta isoform                              | -0.8646 | 0.0034 |
| 201409_s_at | PPP1CB    | protein phosphatase 1; catalytic subunit; beta isoform                              | -0.4323 | 0.0065 |
| 201413_at   | HSD17B4   | hydroxysteroid (17-beta) dehydrogenase 4                                            | -0.4815 | 0.0098 |
| 201425_at   | ALDH2     | aldehyde dehydrogenase 2 family (mitochondrial)                                     | -0.9988 | 0.0032 |
| 201427_s_at | SEPP1     | selenoprotein P; plasma; 1                                                          | -0.6942 | 0.0015 |
| 201432_at   | CAT       | catalase                                                                            | -1.3665 | 0      |
| 201445_at   | CNN3      | calponin 3; acidic                                                                  | -0.8088 | 0.0458 |
| 201455_s_at | NPEPPS    | aminopeptidase puromycin sensitive                                                  | -0.5084 | 0.0115 |
| 201460_at   | MAPKAPK2  | mitogen-activated protein kinase-activated protein kinase 2                         | -1.0257 | 0      |
| 201461_s_at | MAPKAPK2  | mitogen-activated protein kinase-activated protein kinase 2                         | -1.0001 | 0.0016 |
| 201463_s_at | TALDO1    | transaldolase 1                                                                     | -0.5467 | 0.0023 |
| 201473_at   | JUNB      | jun B proto-oncogene                                                                | -2.032  | 0      |
| 201474_s_at | ITGA3     | integrin; alpha 3 (antigen CD49C; alpha 3 subunit of VLA-3 receptor)                | -0.8179 | 0.0015 |
| 201484_at   | SUPT4H1   | suppressor of Ty 4 homolog 1 (S. cerevisiae)                                        | -0.5271 | 0.0155 |
| 201494_at   | PRCP      | prolylcarboxypeptidase (angiotensinase C)                                           | -0.4325 | 0.03   |
| 201497_x_at | MYH11     | myosin; heavy chain 11; smooth muscle                                               | -1.1538 | 0.018  |
| 201502_s_at | NFKBIA    | nuclear factor of kappa light polypeptide gene enhancer in B-cells inhibitor; alpha | -1.0435 | 0      |
| 201506_at   | TGFBI     | transforming growth factor; beta-induced; 68kDa                                     | -1.6288 | 0.0122 |
| 201508_at   | IGFBP4    | insulin-like growth factor binding protein 4                                        | -2.3087 | 0.0001 |
| 201516_at   | SRM       | spermidine synthase                                                                 | -0.5377 | 0.0408 |
| 201517_at   | NCBP2     | nuclear cap binding protein subunit 2; 20kDa                                        | -0.4648 | 0.0002 |



|             |           |                                                                                          |         |        |
|-------------|-----------|------------------------------------------------------------------------------------------|---------|--------|
| 201525_at   | APOD      | apolipoprotein D                                                                         | -3.4519 | 0      |
| 201530_x_at | EIF4A1    | eukaryotic translation initiation factor 4A; isoform 1                                   | -0.2387 | 0.0155 |
| 201531_at   | ZFP36     | zinc finger protein 36; C3H type; homolog (mouse)                                        | -1.8644 | 0.0001 |
| 201540_at   | FHL1      | four and a half LIM domains 1                                                            | -1.8166 | 0.0002 |
| 201547_at   | JARID1B   | jumonji; AT rich interactive domain 1B                                                   | -0.1223 | 0.0301 |
| 201556_s_at | VAMP2     | vesicle-associated membrane protein 2 (synaptobrevin 2)                                  | -0.832  | 0.0008 |
| 201557_at   | VAMP2     | vesicle-associated membrane protein 2 (synaptobrevin 2)                                  | -0.9649 | 0      |
| 201560_at   | CLIC4     | chloride intracellular channel 4                                                         | -0.5548 | 0.0102 |
| 201562_s_at | LOC653381 | similar to Sorbitol dehydrogenase (L-iditol 2-dehydrogenase), sorbitol dehydrogenase     | -0.9098 | 0.0093 |
| 201563_at   | SORD      | sorbitol dehydrogenase                                                                   | -1.3068 | 0.0004 |
| 201572_x_at | DCTD      | dCMP deaminase                                                                           | -0.3651 | 0.0306 |
| 201573_s_at | ETF1      | eukaryotic translation termination factor 1                                              | -0.5571 | 0.0148 |
| 201578_at   | PODXL     | podocalyxin-like                                                                         | -0.7909 | 0.019  |
| 201586_s_at | SFPQ      | splicing factor proline/glutamine-rich (polypyrimidine tract binding protein associated) | -0.3515 | 0.0453 |
| 201595_s_at | ZC3H15    | zinc finger CCCH-type containing 15                                                      | -0.3703 | 0.0122 |
| 201599_at   | OAT       | ornithine aminotransferase (gyrate atrophy)                                              | -0.4359 | 0.0335 |
| 201601_x_at | IFITM1    | interferon induced transmembrane protein 1 (9-27)                                        | -1.3026 | 0.0032 |
| 201605_x_at | CNN2      | calponin 2                                                                               | -0.5493 | 0.0056 |
| 201612_at   | ALDH9A1   | aldehyde dehydrogenase 9 family; member A1                                               | -0.3113 | 0.0058 |
| 201616_s_at | CALD1     | caldesmon 1                                                                              | -1.2892 | 0.0042 |
| 201617_x_at | CALD1     | caldesmon 1                                                                              | -1.3894 | 0.0024 |
| 201628_s_at | RRAGA     | Ras-related GTP binding A                                                                | -0.5215 | 0.0029 |
| 201631_s_at | IER3      | immediate early response 3                                                               | -3.69   | 0      |
| 201637_s_at | FXR1      | fragile X mental retardation; autosomal homolog 1                                        | -0.4116 | 0.0113 |
| 201650_at   | KRT19     | keratin 19                                                                               | -0.2641 | 0.0109 |
| 201651_s_at | PACSIN2   | protein kinase C and casein kinase substrate in neurons 2                                | -0.6089 | 0.0004 |
| 201662_s_at | ACSL3     | acyl-CoA synthetase long-chain family member 3                                           | -0.4732 | 0.0031 |
| 201665_x_at | RPS17     | ribosomal protein S17                                                                    | -0.1313 | 0.0152 |
| 201667_at   | GJA1      | gap junction protein; alpha 1; 43kDa                                                     | -0.8707 | 0.0207 |
| 201677_at   | C3orf37   | Chromosome 3 open reading frame 37                                                       | -0.6007 | 0.0017 |
| 201681_s_at | DLG5      | discs; large homolog 5 (Drosophila)                                                      | -0.6618 | 0.0004 |
| 201687_s_at | API5      | apoptosis inhibitor 5                                                                    | -0.7566 | 0      |
| 201693_s_at | EGR1      | early growth response 1                                                                  | -3.3174 | 0      |
| 201694_s_at | EGR1      | early growth response 1                                                                  | -2.4073 | 0.0001 |
| 201703_s_at | PPP1R10   | protein phosphatase 1; regulatory (inhibitor) subunit 10                                 | -0.79   | 0.0327 |

|             |           |                                                                                                                                         |         |        |
|-------------|-----------|-----------------------------------------------------------------------------------------------------------------------------------------|---------|--------|
| 201706_s_at | PEX19     | peroxisomal biogenesis factor 19                                                                                                        | -0.8751 | 0      |
| 201707_at   | PEX19     | peroxisomal biogenesis factor 19                                                                                                        | -0.7718 | 0      |
| 201711_x_at | RANBP2    | RAN binding protein 2                                                                                                                   | -1.4384 | 0.0009 |
| 201712_s_at | RANBP2    | RAN binding protein 2                                                                                                                   | -2.2623 | 0      |
| 201713_s_at | RANBP2    | RAN binding protein 2                                                                                                                   | -1.8732 | 0      |
| 201717_at   | MRPL49    | mitochondrial ribosomal protein L49                                                                                                     | -0.9818 | 0.0001 |
| 201719_s_at | EPB41L2   | erythrocyte membrane protein band 4.1-like 2                                                                                            | -0.8166 | 0.0469 |
| 201721_s_at | LAPTM5    | lysosomal associated multispinning membrane protein 5                                                                                   | -1.1177 | 0.0069 |
| 201729_s_at | KIAA0100  | KIAA0100                                                                                                                                | -0.9337 | 0.0004 |
| 201734_at   | CLCN3     | Chloride channel 3                                                                                                                      | -0.6255 | 0.0065 |
| 201739_at   | SGK       | serum/glucocorticoid regulated kinase                                                                                                   | -1.9961 | 0      |
| 201740_at   | NDUFS3    | NADH dehydrogenase (ubiquinone) Fe-S protein 3; 30kDa (NADH-coenzyme Q reductase)                                                       | -0.6397 | 0.0004 |
| 201743_at   | CD14      | CD14 molecule                                                                                                                           | -4.1525 | 0      |
| 201744_s_at | LUM       | lumican                                                                                                                                 | -3.0717 | 0.0008 |
| 201749_at   | ECE1      | Endothelin converting enzyme 1                                                                                                          | -0.8795 | 0      |
| 201751_at   | JOSD1     | Josephin domain containing 1                                                                                                            | -1.1467 | 0.0004 |
| 201758_at   | TSG101    | tumor susceptibility gene 101                                                                                                           | -0.4348 | 0.004  |
| 201767_s_at | ELAC2     | elaC homolog 2 (E. coli)                                                                                                                | -0.4847 | 0.0157 |
| 201778_s_at | KIAA0494  | KIAA0494                                                                                                                                | -0.5393 | 0      |
| 201783_s_at | RELA      | v-rel reticuloendotheliosis viral oncogene homolog A; nuclear factor of kappa light polypeptide gene enhancer in B-cells 3; p65 (avian) | -0.3509 | 0.023  |
| 201784_s_at | C11orf58  | chromosome 11 open reading frame 58                                                                                                     | -0.3977 | 0.0345 |
| 201785_at   | RNASE1    | ribonuclease; RNase A family; 1 (pancreatic)                                                                                            | -1.6462 | 0.0036 |
| 201787_at   | FBLN1     | fibulin 1                                                                                                                               | -2.0942 | 0.0001 |
| 201792_at   | AEBP1     | AE binding protein 1                                                                                                                    | -2.4258 | 0.0002 |
| 201799_s_at | OSBP      | oxysterol binding protein                                                                                                               | -0.8555 | 0.0059 |
| 201800_s_at | OSBP      | oxysterol binding protein                                                                                                               | -0.7858 | 0      |
| 201808_s_at | ENG       | endoglin (Osler-Rendu-Weber syndrome 1)                                                                                                 | -0.1472 | 0.0421 |
| 201809_s_at | ENG       | endoglin (Osler-Rendu-Weber syndrome 1)                                                                                                 | -1.3266 | 0.0001 |
| 201810_s_at | SH3BP5    | SH3-domain binding protein 5 (BTK-associated)                                                                                           | -0.9897 | 0.0119 |
| 201811_x_at | SH3BP5    | SH3-domain binding protein 5 (BTK-associated)                                                                                           | -0.6238 | 0.0187 |
| 201812_s_at | LOC201725 | hypothetical protein LOC201725, translocase of outer mitochondrial membrane 7 homolog (yeast)                                           | -0.2657 | 0.0323 |
| 201814_at   | TBC1D5    | TBC1 domain family; member 5                                                                                                            | -0.4741 | 0.0021 |
| 201816_s_at | GBAS      | glioblastoma amplified sequence                                                                                                         | -0.9414 | 0.0001 |
| 201825_s_at | SCCPDH    | saccharopine dehydrogenase (putative)                                                                                                   | -2.1071 | 0      |

|             |          |                                                                                          |         |        |
|-------------|----------|------------------------------------------------------------------------------------------|---------|--------|
| 201826_s_at | SCCPDH   | saccharopine dehydrogenase (putative)                                                    | -1.6944 | 0      |
| 201842_s_at | EFEMP1   | EGF-containing fibulin-like extracellular matrix protein 1                               | -2.8959 | 0.0021 |
| 201843_s_at | EFEMP1   | EGF-containing fibulin-like extracellular matrix protein 1                               | -2.7909 | 0.0008 |
| 201859_at   | SRGN     | serglycin                                                                                | -0.7271 | 0.0043 |
| 201860_s_at | PLAT     | plasminogen activator; tissue                                                            | -4.0632 | 0      |
| 201871_s_at | LOC51035 | SAPK substrate protein 1                                                                 | -1.0005 | 0.0001 |
| 201882_x_at | B4GALT1  | UDP-Gal:betaGlcNAc beta 1;4-galactosyltransferase; polypeptide 1                         | -0.1846 | 0.0148 |
| 201883_s_at | B4GALT1  | UDP-Gal:betaGlcNAc beta 1;4-galactosyltransferase; polypeptide 1                         | -0.9818 | 0      |
| 201887_at   | IL13RA1  | interleukin 13 receptor; alpha 1                                                         | -0.7755 | 0.0035 |
| 201893_x_at | DCN      | decorin                                                                                  | -3.7936 | 0.0008 |
| 201909_at   | RPS4Y1   | ribosomal protein S4; Y-linked 1                                                         | -3.9755 | 0.003  |
| 201921_at   | GNG10    | guanine nucleotide binding protein (G protein); gamma 10, hypothetical protein LOC552891 | -0.2488 | 0.0393 |
| 201924_at   | AFF1     | AF4/FMR2 family; member 1                                                                | -0.393  | 0.0152 |
| 201925_s_at | CD55     | CD55 molecule; decay accelerating factor for complement (Cromer blood group)             | -2.5472 | 0      |
| 201926_s_at | CD55     | CD55 molecule; decay accelerating factor for complement (Cromer blood group)             | -2.6316 | 0      |
| 201931_at   | ETFA     | electron-transfer-flavoprotein; alpha polypeptide (glutaric aciduria II)                 | -0.5895 | 0.0007 |
| 201936_s_at | EIF4G3   | eukaryotic translation initiation factor 4 gamma; 3                                      | -0.3752 | 0.02   |
| 201949_x_at | CAPZB    | capping protein (actin filament) muscle Z-line; beta                                     | -0.1642 | 0.0487 |
| 201957_at   | PPP1R12B | protein phosphatase 1; regulatory (inhibitor) subunit 12B                                | -0.8603 | 0.0016 |
| 201966_at   | NDUFS2   | NADH dehydrogenase (ubiquinone) Fe-S protein 2; 49kDa (NADH-coenzyme Q reductase)        | -0.7409 | 0.0005 |
| 201968_s_at | PGM1     | phosphoglucomutase 1                                                                     | -0.688  | 0.0037 |
| 201978_s_at | KIAA0141 | KIAA0141                                                                                 | -0.6444 | 0.0013 |
| 201988_s_at | CREBL2   | cAMP responsive element binding protein-like 2                                           | -1.6316 | 0.0001 |
| 201989_s_at | CREBL2   | cAMP responsive element binding protein-like 2                                           | -1.0604 | 0      |
| 201990_s_at | CREBL2   | cAMP responsive element binding protein-like 2                                           | -1.6918 | 0      |
| 202000_at   | NDUFA6   | NADH dehydrogenase (ubiquinone) 1 alpha subcomplex; 6; 14kDa                             | -0.857  | 0.0213 |
| 202003_s_at | ACAA2    | acetyl-Coenzyme A acyltransferase 2 (mitochondrial 3-oxoacyl-Coenzyme A thiolase)        | -1.7004 | 0.0002 |
| 202007_at   | NID1     | nidogen 1                                                                                | -1.4298 | 0.0007 |
| 202008_s_at | NID1     | nidogen 1                                                                                | -0.5577 | 0.031  |
| 202010_s_at | ZNF410   | zinc finger protein 410                                                                  | -0.8052 | 0.0003 |
| 202016_at   | MEST     | mesoderm specific transcript homolog (mouse)                                             | -1.6687 | 0.012  |
| 202017_at   | EPHX1    | epoxide hydrolase 1; microsomal (xenobiotic)                                             | -0.5906 | 0.0416 |

|             |         |                                                                                 |         |        |
|-------------|---------|---------------------------------------------------------------------------------|---------|--------|
| 202021_x_at | EIF1    | eukaryotic translation initiation factor 1                                      | -0.2416 | 0.003  |
| 202023_at   | EFNA1   | ephrin-A1                                                                       | -0.7683 | 0.028  |
| 202025_x_at | ACAA1   | acetyl-Coenzyme A acyltransferase 1 (peroxisomal 3-oxoacyl-Coenzyme A thiolase) | -0.4509 | 0.0017 |
| 202026_at   | SDHD    | succinate dehydrogenase complex; subunit D; integral membrane protein           | -0.5313 | 0.0103 |
| 202028_s_at | RPL38   | ribosomal protein L38                                                           | -0.4826 | 0.037  |
| 202029_x_at | RPL38   | ribosomal protein L38                                                           | -0.1633 | 0.0486 |
| 202038_at   | UBE4A   | ubiquitination factor E4A (UFD2 homolog; yeast)                                 | -0.331  | 0.0203 |
| 202048_s_at | CBX6    | chromobox homolog 6                                                             | -0.5449 | 0.0038 |
| 202053_s_at | ALDH3A2 | aldehyde dehydrogenase 3 family; member A2                                      | -1.2416 | 0      |
| 202054_s_at | ALDH3A2 | aldehyde dehydrogenase 3 family; member A2                                      | -1.5267 | 0      |
| 202055_at   | KPNA1   | karyopherin alpha 1 (importin alpha 5)                                          | -0.3662 | 0.0221 |
| 202057_at   | KPNA1   | karyopherin alpha 1 (importin alpha 5)                                          | -0.6988 | 0.0005 |
| 202060_at   | CTR9    | Ctr9; Paf1/RNA polymerase II complex component; homolog (S. cerevisiae)         | -0.4966 | 0.0034 |
| 202071_at   | SDC4    | syndecan 4                                                                      | -1.4405 | 0.0031 |
| 202075_s_at | PLTP    | phospholipid transfer protein                                                   | -3.088  | 0      |
| 202081_at   | IER2    | immediate early response 2                                                      | -1.2042 | 0      |
| 202082_s_at | SEC14L1 | SEC14-like 1 (S. cerevisiae)                                                    | -0.8382 | 0.0043 |
| 202083_s_at | SEC14L1 | SEC14-like 1 (S. cerevisiae)                                                    | -1.8109 | 0      |
| 202084_s_at | SEC14L1 | SEC14-like 1 (S. cerevisiae)                                                    | -1.1379 | 0      |
| 202096_s_at | TSPO    | translocator protein (18kDa)                                                    | -1.3419 | 0.0155 |
| 202108_at   | PEPD    | peptidase D                                                                     | -0.4634 | 0.007  |
| 202109_at   | ARFIP2  | ADP-ribosylation factor interacting protein 2 (arfaptin 2)                      | -0.7011 | 0.0086 |
| 202121_s_at | CHMP2A  | chromatin modifying protein 2A                                                  | -0.217  | 0.0466 |
| 202125_s_at | TRAK2   | trafficking protein; kinesin binding 2                                          | -0.7182 | 0.0089 |
| 202126_at   | PRPF4B  | PRP4 pre-mRNA processing factor 4 homolog B (yeast)                             | -0.3248 | 0.017  |
| 202135_s_at | ACTR1B  | ARP1 actin-related protein 1 homolog B; centractin beta (yeast)                 | -0.5761 | 0.0009 |
| 202139_at   | AKR7A2  | aldo-keto reductase family 7; member A2 (aflatoxin aldehyde reductase)          | -1.5239 | 0      |
| 202149_at   | NEDD9   | neural precursor cell expressed; developmentally down-regulated 9               | -2.0846 | 0      |
| 202150_s_at | NEDD9   | neural precursor cell expressed; developmentally down-regulated 9               | -0.9901 | 0      |
| 202157_s_at | CUGBP2  | CUG triplet repeat; RNA binding protein 2                                       | -1.698  | 0.0153 |
| 202172_at   | VEZF1   | vascular endothelial zinc finger 1                                              | -0.493  | 0.0127 |
| 202177_at   | GAS6    | growth arrest-specific 6                                                        | -1.16   | 0      |
| 202178_at   | PRKCZ   | protein kinase C; zeta                                                          | -1.036  | 0.0091 |
| 202192_s_at | GAS7    | growth arrest-specific 7                                                        | -0.7206 | 0.0317 |

|             |          |                                                                                                        |         |        |
|-------------|----------|--------------------------------------------------------------------------------------------------------|---------|--------|
| 202196_s_at | DKK3     | dickkopf homolog 3 ( <i>Xenopus laevis</i> )                                                           | -3.0544 | 0      |
| 202197_at   | MTMR3    | myotubularin related protein 3                                                                         | -0.6493 | 0.0398 |
| 202211_at   | ARFGAP3  | ADP-ribosylation factor GTPase activating protein 3                                                    | -1.3904 | 0      |
| 202218_s_at | FADS2    | fatty acid desaturase 2                                                                                | -0.6835 | 0.0397 |
| 202222_s_at | DES      | desmin                                                                                                 | -0.1346 | 0.0403 |
| 202225_at   | CRK      | v-crk sarcoma virus CT10 oncogene homolog (avian)                                                      | -0.516  | 0.0059 |
| 202231_at   | EIF3M    | eukaryotic translation initiation factor 3; subunit M                                                  | -0.4142 | 0.0021 |
| 202232_s_at | EIF3M    | eukaryotic translation initiation factor 3; subunit M                                                  | -0.4202 | 0.0128 |
| 202237_at   | NNMT     | nicotinamide N-methyltransferase                                                                       | -2.3359 | 0.0031 |
| 202238_s_at | NNMT     | nicotinamide N-methyltransferase                                                                       | -1.695  | 0.0107 |
| 202239_at   | PARP4    | poly (ADP-ribose) polymerase family; member 4                                                          | -0.5173 | 0.0106 |
| 202241_at   | TRIB1    | tribbles homolog 1 ( <i>Drosophila</i> )                                                               | -1.6159 | 0.002  |
| 202250_s_at | WDR42A   | WD repeat domain 42A                                                                                   | -0.6626 | 0.0251 |
| 202258_s_at | PFAAP5   | phosphonoformate immuno-associated protein 5                                                           | -0.6532 | 0.0141 |
| 202271_at   | FBXO28   | F-box protein 28                                                                                       | -0.759  | 0.007  |
| 202280_at   |          |                                                                                                        | -0.1524 | 0.0275 |
| 202283_at   | SERPINF1 | serpin peptidase inhibitor; clade F (alpha-2 antiplasmin; pigment epithelium derived factor); member 1 | -2.7235 | 0.0005 |
| 202287_s_at | TACSTD2  | tumor-associated calcium signal transducer 2                                                           | -0.1705 | 0.0047 |
| 202291_s_at | MGP      | matrix Gla protein                                                                                     | -1.5657 | 0.0001 |
| 202294_at   | STAG1    | stromal antigen 1                                                                                      | -0.5627 | 0.003  |
| 202295_s_at | CTSH     | cathepsin H                                                                                            | -1.3945 | 0.0019 |
| 202305_s_at | FEZ2     | fasciculation and elongation protein zeta 2 (zygin II)                                                 | -0.5005 | 0.0475 |
| 202308_at   | SREBF1   | sterol regulatory element binding transcription factor 1                                               | -2.4836 | 0      |
| 202317_s_at | UBE4B    | ubiquitination factor E4B (UFD2 homolog; yeast)                                                        | -0.9938 | 0.0013 |
| 202318_s_at | SENP6    | SUMO1/sentrin specific peptidase 6                                                                     | -0.3858 | 0.0452 |
| 202321_at   | GGPS1    | geranylgeranyl diphosphate synthase 1                                                                  | -0.7808 | 0.0224 |
| 202340_x_at | NR4A1    | nuclear receptor subfamily 4; group A; member 1                                                        | -2.6239 | 0      |
| 202350_s_at | MATN2    | matrilin 2                                                                                             | -3.3857 | 0      |
| 202351_at   | ITGAV    | integrin; alpha V (vitronectin receptor; alpha polypeptide; antigen CD51)                              | -0.4461 | 0.0143 |
| 202352_s_at | PSMD12   | proteasome (prosome; macropain) 26S subunit; non-ATPase; 12                                            | -0.7514 | 0.0029 |
| 202359_s_at | SNX19    | sorting nexin 19                                                                                       | -0.9854 | 0.0016 |
| 202377_at   | LEPROT   | leptin receptor overlapping transcript                                                                 | -0.6117 | 0.0017 |
| 202387_at   | BAG1     | BCL2-associated athanogene                                                                             | -0.8107 | 0.0015 |
| 202388_at   | RGS2     | regulator of G-protein signaling 2; 24kDa                                                              | -2.1377 | 0.0003 |

|             |         |                                                                                  |         |        |
|-------------|---------|----------------------------------------------------------------------------------|---------|--------|
| 202390_s_at | HD      | huntingtin (Huntington disease)                                                  | -0.5828 | 0.0148 |
| 202394_s_at | ABCF3   | ATP-binding cassette; sub-family F (GCN20); member 3                             | -0.7683 | 0.0061 |
| 202426_s_at | RXRA    | retinoid X receptor; alpha                                                       | -0.3277 | 0.0165 |
| 202427_s_at | BRP44   | brain protein 44                                                                 | -0.6002 | 0.0458 |
| 202429_s_at | PPP3CA  | protein phosphatase 3 (formerly 2B); catalytic subunit; alpha isoform            | -0.6869 | 0.0012 |
| 202431_s_at | MYC     | v-myc myelocytomatosis viral oncogene homolog (avian)                            | -2.3576 | 0      |
| 202432_at   | PPP3CB  | protein phosphatase 3 (formerly 2B); catalytic subunit; beta isoform             | -0.498  | 0.0001 |
| 202435_s_at | CYP1B1  | cytochrome P450; family 1; subfamily B; polypeptide 1                            | -1.9162 | 0.0006 |
| 202436_s_at | CYP1B1  | cytochrome P450; family 1; subfamily B; polypeptide 1                            | -2.7869 | 0.0001 |
| 202437_s_at | CYP1B1  | cytochrome P450; family 1; subfamily B; polypeptide 1                            | -3.1938 | 0      |
| 202449_s_at | RXRA    | retinoid X receptor; alpha                                                       | -1.2703 | 0.0001 |
| 202454_s_at | ERBB3   | v-erb-b2 erythroblastic leukemia viral oncogene homolog 3 (avian)                | -0.2781 | 0.0011 |
| 202468_s_at | CTNNA1  | catenin (cadherin-associated protein); alpha-like 1                              | -0.7368 | 0.0131 |
| 202481_at   | DHRS3   | dehydrogenase/reductase (SDR family) member 3                                    | -0.7723 | 0.0475 |
| 202484_s_at | MBD2    | methyl-CpG binding domain protein 2                                              | -0.6562 | 0      |
| 202485_s_at | MBD2    | methyl-CpG binding domain protein 2                                              | -0.1017 | 0.0138 |
| 202488_s_at | FXD3    | FXD domain containing ion transport regulator 3                                  | -0.3961 | 0.0022 |
| 202500_at   | DNAJB2  | DnaJ (Hsp40) homolog; subfamily B; member 2                                      | -0.6698 | 0.0021 |
| 202502_at   | ACADM   | acyl-Coenzyme A dehydrogenase; C-4 to C-12 straight chain                        | -0.5796 | 0.006  |
| 202509_s_at | TNFAIP2 | tumor necrosis factor; alpha-induced protein 2                                   | -0.3273 | 0.0001 |
| 202510_s_at | TNFAIP2 | tumor necrosis factor; alpha-induced protein 2                                   | -1.7852 | 0.0009 |
| 202523_s_at | SPOCK2  | sparc/osteonectin; cwcv and kazal-like domains proteoglycan (testican) 2         | -1.0676 | 0      |
| 202524_s_at | SPOCK2  | sparc/osteonectin; cwcv and kazal-like domains proteoglycan (testican) 2         | -2.8028 | 0      |
| 202526_at   | SMAD4   | SMAD family member 4                                                             | -0.3355 | 0.0001 |
| 202537_s_at | CHMP2B  | chromatin modifying protein 2B                                                   | -0.5644 | 0.01   |
| 202541_at   | SCYE1   | small inducible cytokine subfamily E; member 1 (endothelial monocyte-activating) | -0.651  | 0.0005 |
| 202546_at   | VAMP8   | vesicle-associated membrane protein 8 (endobrevin)                               | -2.1593 | 0.0002 |
| 202550_s_at | VAPB    | VAMP (vesicle-associated membrane protein)-associated protein B and C            | -0.5167 | 0.0012 |
| 202551_s_at | CRIM1   | cysteine rich transmembrane BMP regulator 1 (chordin-like)                       | -0.8354 | 0.0158 |
| 202552_s_at | CRIM1   | cysteine rich transmembrane BMP regulator 1 (chordin-like)                       | -1.0252 | 0.0041 |
| 202553_s_at | SYF2    | SYF2 homolog; RNA splicing factor (S. cerevisiae)                                | -0.4083 | 0.0017 |

|             |          |                                                                                                |         |        |
|-------------|----------|------------------------------------------------------------------------------------------------|---------|--------|
| 202555_s_at | MYLK     | myosin; light chain kinase                                                                     | -3.0704 | 0      |
| 202565_s_at | SVIL     | supervillin                                                                                    | -1.8426 | 0.0007 |
| 202568_s_at | MARK3    | MAP/microtubule affinity-regulating kinase 3                                                   | -0.532  | 0.0342 |
| 202584_at   | NFX1     | nuclear transcription factor; X-box binding 1                                                  | -0.6257 | 0.0007 |
| 202590_s_at | PDK2     | pyruvate dehydrogenase kinase; isozyme 2                                                       | -1.5921 | 0.0001 |
| 202595_s_at | LEPROTL1 | leptin receptor overlapping transcript-like 1                                                  | -0.4714 | 0.0446 |
| 202598_at   | S100A13  | S100 calcium binding protein A13                                                               | -1.3498 | 0.0467 |
| 202609_at   | EPS8     | epidermal growth factor receptor pathway substrate 8                                           | -1.1663 | 0.0023 |
| 202615_at   | GNAQ     | Guanine nucleotide binding protein (G protein); q polypeptide                                  | -0.4011 | 0.0154 |
| 202623_at   | EAPP     | E2F-associated phosphoprotein                                                                  | -0.5028 | 0.003  |
| 202625_at   | LYN      | v-yes-1 Yamaguchi sarcoma viral related oncogene homolog                                       | -1.3    | 0.0058 |
| 202626_s_at | LYN      | v-yes-1 Yamaguchi sarcoma viral related oncogene homolog                                       | -1.3812 | 0.0134 |
| 202630_at   | APPBP2   | amyloid beta precursor protein (cytoplasmic tail) binding protein 2                            | -0.5775 | 0.013  |
| 202637_s_at | ICAM1    | intercellular adhesion molecule 1 (CD54); human rhinovirus receptor                            | -1.0454 | 0.0495 |
| 202646_s_at | CSDE1    | cold shock domain containing E1; RNA-binding, neuroblastoma RAS viral (v-ras) oncogene homolog | -0.6816 | 0.0001 |
| 202650_s_at | KIAA0195 | KIAA0195                                                                                       | -0.8009 | 0.0101 |
| 202664_at   | WIPF1    | WAS/WASL interacting protein family; member 1                                                  | -1.3476 | 0.0098 |
| 202668_at   | EFNB2    | ephrin-B2                                                                                      | -0.9687 | 0.0489 |
| 202672_s_at | ATF3     | activating transcription factor 3                                                              | -3.114  | 0.0001 |
| 202673_at   | DPM1     | dolichyl-phosphate mannosyltransferase polypeptide 1; catalytic subunit                        | -0.3859 | 0.0188 |
| 202675_at   | SDHB     | succinate dehydrogenase complex; subunit B; iron sulfur (lp)                                   | -0.4971 | 0.0358 |
| 202679_at   | NPC1     | Niemann-Pick disease; type C1                                                                  | -2.1672 | 0      |
| 202681_at   | USP4     | ubiquitin specific peptidase 4 (proto-oncogene)                                                | -0.3824 | 0.0248 |
| 202684_s_at | RNMT     | RNA (guanine-7-) methyltransferase                                                             | -0.5269 | 0.0002 |
| 202685_s_at | AXL      | AXL receptor tyrosine kinase                                                                   | -0.6279 | 0      |
| 202686_s_at | AXL      | AXL receptor tyrosine kinase                                                                   | -3.8518 | 0      |
| 202687_s_at | TNFSF10  | tumor necrosis factor (ligand) superfamily; member 10                                          | -1.4905 | 0.0001 |
| 202688_at   | TNFSF10  | tumor necrosis factor (ligand) superfamily; member 10                                          | -1.4601 | 0.0001 |
| 202689_at   | RBM15B   | RNA binding motif protein 15B                                                                  | -0.3107 | 0.0373 |
| 202692_s_at | UBTF     | upstream binding transcription factor; RNA polymerase I                                        | -0.4468 | 0.0358 |
| 202701_at   | BMP1     | bone morphogenetic protein 1                                                                   | -0.8004 | 0.0136 |
| 202704_at   | TOB1     | transducer of ERBB2; 1                                                                         | -1.3777 | 0      |
| 202709_at   | FMOD     | fibromodulin                                                                                   | -1.1379 | 0.0001 |
| 202725_at   | POLR2A   | polymerase (RNA) II (DNA directed) polypeptide A; 220kDa                                       | -0.8255 | 0.0073 |

|             |          |                                                                                   |         |        |
|-------------|----------|-----------------------------------------------------------------------------------|---------|--------|
| 202740_at   | ACY1     | aminoacylase 1                                                                    | -0.7966 | 0.0199 |
| 202746_at   | ITM2A    | integral membrane protein 2A                                                      | -2.0634 | 0.0001 |
| 202747_s_at | ITM2A    | integral membrane protein 2A                                                      | -1.022  | 0.0016 |
| 202748_at   | GBP2     | guanylate binding protein 2; interferon-inducible                                 | -2.4656 | 0.0001 |
| 202764_at   | STIM1    | stromal interaction molecule 1                                                    | -0.2159 | 0.0429 |
| 202768_at   | FOSB     | FBJ murine osteosarcoma viral oncogene homolog B                                  | -4.3781 | 0      |
| 202772_at   | HMGCL    | 3-hydroxymethyl-3-methylglutaryl-Coenzyme A lyase (hydroxymethylglutaricaciduria) | -0.8186 | 0.0006 |
| 202776_at   | DNTTIP2  | deoxynucleotidyltransferase; terminal; interacting protein 2                      | -0.6058 | 0.0012 |
| 202781_s_at | SKIP     | skeletal muscle and kidney enriched inositol phosphatase                          | -0.6621 | 0.0001 |
| 202782_s_at | SKIP     | skeletal muscle and kidney enriched inositol phosphatase                          | -0.4782 | 0.0053 |
| 202792_s_at | SAPS2    | SAPS domain family; member 2                                                      | -0.9155 | 0.0012 |
| 202803_s_at | ITGB2    | integrin; beta 2 (complement component 3 receptor 3 and 4 subunit)                | -1.2845 | 0.0318 |
| 202807_s_at | TOM1     | target of myb1 (chicken)                                                          | -0.4893 | 0.0083 |
| 202808_at   | C10orf26 | chromosome 10 open reading frame 26                                               | -0.8422 | 0.0009 |
| 202810_at   | DRG1     | developmentally regulated GTP binding protein 1                                   | -0.7556 | 0.0018 |
| 202814_s_at | HEXIM1   | hexamethylene bis-acetamide inducible 1                                           | -1.746  | 0      |
| 202815_s_at | HEXIM1   | hexamethylene bis-acetamide inducible 1                                           | -1.7209 | 0      |
| 202817_s_at | SS18     | synovial sarcoma translocation; chromosome 18                                     | -0.9032 | 0.0116 |
| 202822_at   | LPP      | LIM domain containing preferred translocation partner in lipoma                   | -0.923  | 0      |
| 202832_at   | GCC2     | GRIP and coiled-coil domain containing 2                                          | -0.586  | 0.0149 |
| 202838_at   | FUCA1    | fucosidase; alpha-L- 1; tissue                                                    | -0.8129 | 0.0112 |
| 202842_s_at | DNAJB9   | DnaJ (Hsp40) homolog; subfamily B; member 9                                       | -0.6165 | 0.0119 |
| 202843_at   | DNAJB9   | DnaJ (Hsp40) homolog; subfamily B; member 9                                       | -0.9332 | 0.0058 |
| 202853_s_at | RYK      | RYK receptor-like tyrosine kinase                                                 | -0.5435 | 0.0052 |
| 202861_at   | PER1     | period homolog 1 (Drosophila)                                                     | -1.6052 | 0      |
| 202862_at   | FAH      | fumarylacetoacetate hydrolase (fumarylacetoacetase)                               | -0.9465 | 0.0092 |
| 202863_at   | SP100    | SP100 nuclear antigen                                                             | -0.8039 | 0.0221 |
| 202867_s_at | DNAJB12  | DnaJ (Hsp40) homolog; subfamily B; member 12                                      | -0.5178 | 0.0286 |
| 202883_s_at | PPP2R1B  | protein phosphatase 2 (formerly 2A); regulatory subunit A; beta isoform           | -1.5916 | 0.0004 |
| 202885_s_at | PPP2R1B  | protein phosphatase 2 (formerly 2A); regulatory subunit A; beta isoform           | -0.1358 | 0.0008 |
| 202886_s_at | PPP2R1B  | protein phosphatase 2 (formerly 2A); regulatory subunit A; beta isoform           | -1.5564 | 0.0003 |



|             |           |                                                                                   |         |        |
|-------------|-----------|-----------------------------------------------------------------------------------|---------|--------|
| 202889_x_at | MAP7      | microtubule-associated protein 7                                                  | -0.5471 | 0.0003 |
| 202890_at   | MAP7      | microtubule-associated protein 7                                                  | -1.9706 | 0      |
| 202891_at   | NIT1      | nitrilase 1                                                                       | -0.7781 | 0.0007 |
| 202893_at   | UNC13B    | unc-13 homolog B (C. elegans)                                                     | -0.6635 | 0.0407 |
| 202900_s_at | NUP88     | nucleoporin 88kDa                                                                 | -0.9059 | 0.0025 |
| 202916_s_at | FAM20B    | family with sequence similarity 20; member B                                      | -0.4674 | 0.0139 |
| 202917_s_at | S100A8    | S100 calcium binding protein A8                                                   | -1.9245 | 0.0197 |
| 202918_s_at | MOBKL3    | MOB1; Mps One Binder kinase activator-like 3 (yeast)                              | -1.1957 | 0.0069 |
| 202919_at   | MOBKL3    | MOB1; Mps One Binder kinase activator-like 3 (yeast)                              | -0.9789 | 0.008  |
| 202920_at   | ANK2      | ankyrin 2; neuronal                                                               | -2.5882 | 0.0031 |
| 202930_s_at | SUCLA2    | succinate-CoA ligase; ADP-forming; beta subunit                                   | -0.8166 | 0.0013 |
| 202931_x_at | BIN1      | bridging integrator 1                                                             | -1.2242 | 0.0052 |
| 202941_at   | NDUFV2    | NADH dehydrogenase (ubiquinone) flavoprotein 2; 24kDa                             | -0.5557 | 0.0002 |
| 202947_s_at | GYPC      | glycophorin C (Gerbich blood group)                                               | -2.69   | 0      |
| 202948_at   | IL1R1     | interleukin 1 receptor; type I                                                    | -1.532  | 0.0009 |
| 202949_s_at | FHL2      | four and a half LIM domains 2                                                     | -1.5636 | 0.0091 |
| 202953_at   | C1QB      | complement component 1; q subcomponent; B chain                                   | -2.2889 | 0.0005 |
| 202957_at   | HCLS1     | hematopoietic cell-specific Lyn substrate 1                                       | -2.99   | 0      |
| 202962_at   | KIF13B    | kinesin family member 13B                                                         | -0.6237 | 0.0321 |
| 202967_at   | GSTA4     | glutathione S-transferase A4                                                      | -1.5287 | 0      |
| 202974_at   | MPP1      | membrane protein; palmitoylated 1; 55kDa                                          | -0.7252 | 0.0253 |
| 202982_s_at | ACOT1     | acyl-CoA thioesterase 1, acyl-CoA thioesterase 2                                  | -1.509  | 0.0002 |
| 202988_s_at | RGS1      | regulator of G-protein signaling 1                                                | -1.5591 | 0.0276 |
| 202990_at   | PYGL      | phosphorylase; glycogen; liver (Hers disease; glycogen storage disease type VI)   | -1.8906 | 0      |
| 202992_at   | C7        | complement component 7                                                            | -2.116  | 0.0008 |
| 202994_s_at | FBLN1     | fibulin 1                                                                         | -4.328  | 0      |
| 202995_s_at | FBLN1     | fibulin 1                                                                         | -4.7971 | 0      |
| 203002_at   | AMOTL2    | angiomin like 2                                                                   | -1.2061 | 0.0145 |
| 203003_at   | MEF2D     | myocyte enhancer factor 2D                                                        | -0.3791 | 0.0019 |
| 203004_s_at | MEF2D     | myocyte enhancer factor 2D                                                        | -0.2696 | 0.0337 |
| 203010_at   | STAT5A    | signal transducer and activator of transcription 5A                               | -1.5908 | 0      |
| 203012_x_at | RPL23A    | ribosomal protein L23a                                                            | -0.1679 | 0.0013 |
| 203028_s_at | CYBA      | cytochrome b-245; alpha polypeptide                                               | -1.167  | 0.022  |
| 203034_s_at | hCG_21078 | hCG21078, ribosomal protein L27a                                                  | -0.1807 | 0.0111 |
| 203039_s_at | NDUFS1    | NADH dehydrogenase (ubiquinone) Fe-S protein 1; 75kDa (NADH-coenzyme Q reductase) | -0.6239 | 0.001  |
| 203043_at   | ZBED1     | zinc finger; BED-type containing 1                                                | -2.5333 | 0      |

|             |              |                                                                                                        |         |        |
|-------------|--------------|--------------------------------------------------------------------------------------------------------|---------|--------|
| 203045_at   | NINJ1        | ninjurin 1                                                                                             | -0.8968 | 0.0243 |
| 203052_at   | C2           | complement component 2                                                                                 | -0.6948 | 0.0452 |
| 203053_at   | BCAS2        | breast carcinoma amplified sequence 2                                                                  | -0.719  | 0.0015 |
| 203054_s_at | TCTA         | T-cell leukemia translocation altered gene                                                             | -1.1446 | 0.0143 |
| 203058_s_at | PAPSS2       | 3'-phosphoadenosine 5'-phosphosulfate synthase 2                                                       | -1.51   | 0.0138 |
| 203059_s_at | PAPSS2       | 3'-phosphoadenosine 5'-phosphosulfate synthase 2                                                       | -1.1787 | 0.0206 |
| 203060_s_at | PAPSS2       | 3'-phosphoadenosine 5'-phosphosulfate synthase 2                                                       | -1.2381 | 0.0301 |
| 203063_at   | PPM1F        | protein phosphatase 1F (PP2C domain containing)                                                        | -0.7191 | 0.0005 |
| 203064_s_at | FOXK2        | forkhead box K2                                                                                        | -1.5461 | 0      |
| 203066_at   | GALNAC4S-6ST | B cell RAG associated protein                                                                          | -2.2152 | 0.0001 |
| 203071_at   | SEMA3B       | sema domain; immunoglobulin domain (Ig); short basic domain; secreted; (semaphorin) 3B                 | -3.3549 | 0      |
| 203074_at   | ANXA8        | annexin A8, annexin A8-like 1, annexin A8-like 2                                                       | -0.2844 | 0.0031 |
| 203075_at   | SMAD2        | SMAD family member 2                                                                                   | -0.5516 | 0.0082 |
| 203088_at   | FBLN5        | fibulin 5                                                                                              | -3.9232 | 0      |
| 203090_at   | SDF2         | stromal cell-derived factor 2                                                                          | -1.2469 | 0      |
| 203102_s_at | MGAT2        | mannosyl (alpha-1;6-)-glycoprotein beta-1;2-N-acetylglucosaminyltransferase                            | -0.3977 | 0.0229 |
| 203104_at   | CSF1R        | colony stimulating factor 1 receptor; formerly McDonough feline sarcoma viral (v-fms) oncogene homolog | -2.6776 | 0      |
| 203111_s_at | PTK2B        | PTK2B protein tyrosine kinase 2 beta                                                                   | -0.1916 | 0.0069 |
| 203113_s_at | EEF1D        | eukaryotic translation elongation factor 1 delta (guanine nucleotide exchange protein)                 | -0.4109 | 0.0459 |
| 203114_at   | SSSCA1       | Sjogren's syndrome/scleroderma autoantigen 1                                                           | -0.7326 | 0.0003 |
| 203115_at   | FECH         | ferrochelatase (protoporphyrin)                                                                        | -0.6445 | 0.0043 |
| 203116_s_at | FECH         | ferrochelatase (protoporphyrin)                                                                        | -0.5507 | 0.0134 |
| 203126_at   | IMPA2        | inositol(myo)-1(or 4)-monophosphatase 2                                                                | -1.0809 | 0.0006 |
| 203131_at   | PDGFRA       | platelet-derived growth factor receptor; alpha polypeptide                                             | -5.0204 | 0      |
| 203143_s_at | KIAA0040     | KIAA0040                                                                                               | -0.5277 | 0.0215 |
| 203144_s_at | KIAA0040     | KIAA0040                                                                                               | -0.3918 | 0.0005 |
| 203152_at   | MRPL40       | mitochondrial ribosomal protein L40                                                                    | -1.0138 | 0.0005 |
| 203153_at   | IFIT1        | interferon-induced protein with tetratricopeptide repeats 1                                            | -0.7975 | 0.0412 |
| 203156_at   | AKAP11       | A kinase (PRKA) anchor protein 11                                                                      | -0.4621 | 0.0285 |
| 203157_s_at | GLS          | glutaminase                                                                                            | -1.2174 | 0.0242 |
| 203159_at   | GLS          | glutaminase                                                                                            | -1.0295 | 0.0057 |
| 203161_s_at | RNF8         | ring finger protein 8                                                                                  | -0.2582 | 0.0001 |
| 203164_at   | SLC33A1      | solute carrier family 33 (acetyl-CoA transporter); member 1                                            | -1.6538 | 0      |

|             |          |                                                                                   |         |        |
|-------------|----------|-----------------------------------------------------------------------------------|---------|--------|
| 203165_s_at | SLC33A1  | solute carrier family 33 (acetyl-CoA transporter); member 1                       | -1.35   | 0      |
| 203170_at   | KIAA0409 | KIAA0409                                                                          | -0.1947 | 0.0028 |
| 203178_at   | GATM     | glycine amidinotransferase (L-arginine:glycine amidinotransferase)                | -1.5061 | 0.0237 |
| 203179_at   | GALT     | galactose-1-phosphate uridylyltransferase                                         | -0.5729 | 0.0236 |
| 203180_at   | ALDH1A3  | aldehyde dehydrogenase 1 family; member A3                                        | -2.3242 | 0.0014 |
| 203185_at   | RASSF2   | Ras association (RalGDS/AF-6) domain family 2                                     | -2.5797 | 0      |
| 203186_s_at | S100A4   | S100 calcium binding protein A4                                                   | -2.0781 | 0.0023 |
| 203188_at   | B3GNT1   | UDP-GlcNAc:betaGal beta-1;3-N-acetylglucosaminyltransferase 1                     | -0.5558 | 0.0133 |
| 203189_s_at | NDUFS8   | NADH dehydrogenase (ubiquinone) Fe-S protein 8; 23kDa (NADH-coenzyme Q reductase) | -0.6846 | 0.0014 |
| 203190_at   | NDUFS8   | NADH dehydrogenase (ubiquinone) Fe-S protein 8; 23kDa (NADH-coenzyme Q reductase) | -0.588  | 0.0003 |
| 203197_s_at | C1orf123 | chromosome 1 open reading frame 123                                               | -0.6385 | 0.0038 |
| 203200_s_at | MTRR     | 5-methyltetrahydrofolate-homocysteine methyltransferase reductase                 | -0.5156 | 0.0363 |
| 203206_at   | FAM53B   | family with sequence similarity 53; member B                                      | -0.675  | 0.0035 |
| 203233_at   | IL4R     | interleukin 4 receptor                                                            | -1.1061 | 0.0001 |
| 203237_s_at | NOTCH3   | Notch homolog 3 (Drosophila)                                                      | -0.1417 | 0.0164 |
| 203240_at   | FCGBP    | Fc fragment of IgG binding protein                                                | -3.1634 | 0.0001 |
| 203241_at   | UVRAG    | UV radiation resistance associated gene                                           | -1.0895 | 0      |
| 203243_s_at | PDLIM5   | PDZ and LIM domain 5                                                              | -0.565  | 0.0269 |
| 203252_at   | CDK2AP2  | CDK2-associated protein 2                                                         | -2.3935 | 0      |
| 203255_at   | FBXO11   | F-box protein 11                                                                  | -0.7945 | 0.0047 |
| 203259_s_at | HDDC2    | HD domain containing 2                                                            | -0.9339 | 0      |
| 203260_at   | HDDC2    | HD domain containing 2                                                            | -0.6201 | 0.0178 |
| 203266_s_at | MAP2K4   | mitogen-activated protein kinase kinase 4                                         | -0.4696 | 0.0148 |
| 203267_s_at | DRG2     | developmentally regulated GTP binding protein 2                                   | -0.3271 | 0.0246 |
| 203268_s_at | DRG2     | developmentally regulated GTP binding protein 2                                   | -0.2554 | 0.0328 |
| 203292_s_at | VPS11    | vacuolar protein sorting 11 homolog (S. cerevisiae)                               | -0.7823 | 0.0001 |
| 203303_at   | DYNLT3   | dynein; light chain; Tctex-type 3                                                 | -0.7665 | 0.0012 |
| 203305_at   | F13A1    | coagulation factor XIII; A1 polypeptide                                           | -3.7126 | 0      |
| 203310_at   | STXBP3   | syntaxin binding protein 3                                                        | -0.3801 | 0.0254 |
| 203314_at   | GTPBP6   | GTP binding protein 6 (putative)                                                  | -0.5451 | 0.0215 |
| 203320_at   | SH2B3    | SH2B adaptor protein 3                                                            | -1.1425 | 0.0005 |
| 203327_at   | IDE      | insulin-degrading enzyme                                                          | -0.5959 | 0.0124 |
| 203330_s_at | STX5     | syntaxin 5                                                                        | -0.4712 | 0.0028 |

|             |          |                                                             |         |        |
|-------------|----------|-------------------------------------------------------------|---------|--------|
| 203331_s_at | INPP5D   | inositol polyphosphate-5-phosphatase; 145kDa                | -0.2317 | 0.0088 |
| 203335_at   | PHYH     | phytanoyl-CoA 2-hydroxylase                                 | -0.5641 | 0.0015 |
| 203341_at   | CEBPZ    | CCAAT/enhancer binding protein zeta                         | -0.5123 | 0.0072 |
| 203343_at   | UGDH     | UDP-glucose dehydrogenase                                   | -0.962  | 0.0004 |
| 203363_s_at | KIAA0652 | KIAA0652                                                    | -0.4014 | 0.0115 |
| 203364_s_at | KIAA0652 | KIAA0652                                                    | -0.4804 | 0.0103 |
| 203371_s_at | NDUFB3   | NADH dehydrogenase (ubiquinone) 1 beta subcomplex; 3; 12kDa | -0.2645 | 0.0259 |
| 203372_s_at | SOCS2    | suppressor of cytokine signaling 2                          | -2.1473 | 0.0001 |
| 203373_at   | SOCS2    | suppressor of cytokine signaling 2                          | -1.8435 | 0      |
| 203380_x_at | SFRS5    | splicing factor; arginine/serine-rich 5                     | -0.5285 | 0.0002 |
| 203381_s_at | APOE     | apolipoprotein E                                            | -1.5197 | 0.0048 |
| 203382_s_at | APOE     | apolipoprotein E                                            | -1.642  | 0.0033 |
| 203385_at   | DGKA     | diacylglycerol kinase; alpha 80kDa                          | -1.711  | 0.001  |
| 203386_at   | TBC1D4   | TBC1 domain family; member 4                                | -1.1377 | 0.0001 |
| 203387_s_at | TBC1D4   | TBC1 domain family; member 4                                | -1.849  | 0.0001 |
| 203388_at   | ARRB2    | arrestin; beta 2                                            | -1.7151 | 0      |
| 203391_at   | FKBP2    | FK506 binding protein 2; 13kDa                              | -0.4887 | 0.001  |
| 203401_at   | PRPS2    | phosphoribosyl pyrophosphate synthetase 2                   | -2.981  | 0.0002 |
| 203413_at   | NELL2    | NEL-like 2 (chicken)                                        | -0.8753 | 0.0094 |
| 203414_at   | MMD      | monocyte to macrophage differentiation-associated           | -1.6495 | 0.0004 |
| 203416_at   | CD53     | CD53 molecule                                               | -2.0035 | 0.0024 |
| 203420_at   | FAM8A1   | family with sequence similarity 8; member A1                | -0.3238 | 0.0024 |
| 203424_s_at | IGFBP5   | insulin-like growth factor binding protein 5                | -3.2291 | 0      |
| 203425_s_at | IGFBP5   | insulin-like growth factor binding protein 5                | -1.7855 | 0      |
| 203426_s_at | IGFBP5   | insulin-like growth factor binding protein 5                | -0.7388 | 0      |
| 203430_at   | HEBP2    | heme binding protein 2                                      | -1.24   | 0.0046 |
| 203440_at   | CDH2     | cadherin 2; type 1; N-cadherin (neuronal)                   | -3.6018 | 0.0005 |
| 203441_s_at | CDH2     | cadherin 2; type 1; N-cadherin (neuronal)                   | -2.2382 | 0.0006 |
| 203442_x_at | EML3     | echinoderm microtubule associated protein like 3            | -0.6345 | 0.0007 |
| 203443_at   | EML3     | echinoderm microtubule associated protein like 3            | -0.1712 | 0.0204 |
| 203447_at   | PSMD5    | proteasome (prosome; macropain) 26S subunit; non-ATPase; 5  | -0.5815 | 0.0184 |
| 203450_at   | CBY1     | chibby homolog 1 (Drosophila)                               | -0.7012 | 0.0035 |
| 203453_at   | SCNN1A   | sodium channel; nonvoltage-gated 1 alpha                    | -5.0139 | 0      |
| 203455_s_at | SAT1     | spermidine/spermine N1-acetyltransferase 1                  | -0.6313 | 0.0003 |
| 203465_at   | MRPL19   | mitochondrial ribosomal protein L19                         | -0.4333 | 0.0334 |
| 203466_at   | MPV17    | MpV17 mitochondrial inner membrane protein                  | -1.2028 | 0.0004 |

|             |           |                                                                                                                  |         |        |
|-------------|-----------|------------------------------------------------------------------------------------------------------------------|---------|--------|
| 203467_at   | PMM1      | phosphomannomutase 1                                                                                             | -0.6336 | 0.0346 |
| 203471_s_at | PLEK      | pleckstrin                                                                                                       | -1.1296 | 0.0192 |
| 203472_s_at | SLCO2B1   | solute carrier organic anion transporter family; member 2B1                                                      | -0.4836 | 0.0121 |
| 203473_at   | SLCO2B1   | solute carrier organic anion transporter family; member 2B1                                                      | -2.9263 | 0      |
| 203475_at   | CYP19A1   | cytochrome P450; family 19; subfamily A; polypeptide 1                                                           | -1.7957 | 0.0036 |
| 203499_at   | EPHA2     | EPH receptor A2                                                                                                  | -1.0971 | 0      |
| 203504_s_at | ABCA1     | ATP-binding cassette; sub-family A (ABC1); member 1                                                              | -2.2855 | 0.0001 |
| 203505_at   | ABCA1     | ATP-binding cassette; sub-family A (ABC1); member 1                                                              | -1.3596 | 0.0001 |
| 203508_at   | TNFRSF1B  | tumor necrosis factor receptor superfamily; member 1B                                                            | -0.7977 | 0.041  |
| 203511_s_at | TRAPPC3   | trafficking protein particle complex 3                                                                           | -0.653  | 0.0448 |
| 203512_at   | TRAPPC3   | trafficking protein particle complex 3                                                                           | -0.6045 | 0.0172 |
| 203514_at   | MAP3K3    | mitogen-activated protein kinase kinase kinase 3                                                                 | -0.4347 | 0.0469 |
| 203515_s_at | PMVK      | phosphomevalonate kinase                                                                                         | -1.0075 | 0.0005 |
| 203518_at   | LYST      | lysosomal trafficking regulator                                                                                  | -0.7322 | 0.0116 |
| 203522_at   | CCS       | copper chaperone for superoxide dismutase                                                                        | -0.6757 | 0.0093 |
| 203528_at   | SEMA4D    | sema domain; immunoglobulin domain (Ig); transmembrane domain (TM) and short cytoplasmic domain; (semaphorin) 4D | -1.3249 | 0.0007 |
| 203531_at   | CUL5      | cullin 5                                                                                                         | -0.5031 | 0.0027 |
| 203533_s_at | CUL5      | cullin 5                                                                                                         | -0.2575 | 0.0272 |
| 203540_at   | GFAP      | glial fibrillary acidic protein                                                                                  | -0.1787 | 0.0102 |
| 203542_s_at | KLF9      | Kruppel-like factor 9                                                                                            | -1.0062 | 0.0291 |
| 203543_s_at | KLF9      | Kruppel-like factor 9                                                                                            | -1.1801 | 0.0011 |
| 203545_at   | ALG8      | asparagine-linked glycosylation 8 homolog (S. cerevisiae; alpha-1;3-glucosyltransferase)                         | -0.5756 | 0.003  |
| 203547_at   | CD4       | CD4 molecule                                                                                                     | -0.6876 | 0.0335 |
| 203551_s_at | COX11     | COX11 homolog; cytochrome c oxidase assembly protein (yeast)                                                     | -0.5906 | 0.0022 |
| 203556_at   | ZHX2      | zinc fingers and homeoboxes 2                                                                                    | -0.7468 | 0.0172 |
| 203557_s_at | PCBD1     | pterin-4 alpha-carbinolamine dehydratase/dimerization cofactor of hepatocyte nuclear factor 1 alpha (TCF1)       | -0.8188 | 0.032  |
| 203559_s_at | ABP1      | amiloride binding protein 1 (amine oxidase (copper-containing))                                                  | -0.1208 | 0.0391 |
| 203561_at   | FCGR2A    | Fc fragment of IgG; low affinity IIa; receptor (CD32)                                                            | -1.3657 | 0.0047 |
| 203571_s_at | C10orf116 | chromosome 10 open reading frame 116                                                                             | -2.0896 | 0      |
| 203574_at   | NFIL3     | nuclear factor; interleukin 3 regulated                                                                          | -2.6989 | 0      |
| 203576_at   | BCAT2     | branched chain aminotransferase 2; mitochondrial                                                                 | -0.7668 | 0.0052 |
| 203585_at   | ZNF185    | zinc finger protein 185 (LIM domain)                                                                             | -3.3754 | 0      |

|             |          |                                                                                                                                                                                              |         |        |
|-------------|----------|----------------------------------------------------------------------------------------------------------------------------------------------------------------------------------------------|---------|--------|
| 203592_s_at | FSTL3    | follistatin-like 3 (secreted glycoprotein)                                                                                                                                                   | -2.1327 | 0      |
| 203599_s_at | WBP4     | WW domain binding protein 4 (formin binding protein 21)                                                                                                                                      | -0.8931 | 0.025  |
| 203603_s_at | ZEB2     | zinc finger E-box binding homeobox 2                                                                                                                                                         | -2.0998 | 0      |
| 203608_at   | ALDH5A1  | aldehyde dehydrogenase 5 family; member A1 (succinate-semialdehyde dehydrogenase)                                                                                                            | -1.5072 | 0.0008 |
| 203615_x_at | SULT1A1  | sulfotransferase family; cytosolic; 1A; phenol-preferring; member 1                                                                                                                          | -1.0278 | 0.0278 |
| 203618_at   | FAIM2    | Fas apoptotic inhibitory molecule 2                                                                                                                                                          | -0.1744 | 0.014  |
| 203620_s_at | FCHSD2   | FCH and double SH3 domains 2                                                                                                                                                                 | -0.5133 | 0.0374 |
| 203621_at   | NDUFB5   | NADH dehydrogenase (ubiquinone) 1 beta subcomplex; 5; 16kDa                                                                                                                                  | -0.3174 | 0.0105 |
| 203632_s_at | GPRC5B   | G protein-coupled receptor; family C; group 5; member B                                                                                                                                      | -1.3978 | 0.0109 |
| 203633_at   | CPT1A    | carnitine palmitoyltransferase 1A (liver)                                                                                                                                                    | -1.1247 | 0.0003 |
| 203638_s_at | FGFR2    | fibroblast growth factor receptor 2 (bacteria-expressed kinase; keratinocyte growth factor receptor; craniofacial dysostosis 1; Crouzon syndrome; Pfeiffer syndrome; Jackson-Weiss syndrome) | -2.443  | 0.0036 |
| 203639_s_at | FGFR2    | fibroblast growth factor receptor 2 (bacteria-expressed kinase; keratinocyte growth factor receptor; craniofacial dysostosis 1; Crouzon syndrome; Pfeiffer syndrome; Jackson-Weiss syndrome) | -1.736  | 0.0016 |
| 203640_at   | MBNL2    | muscleblind-like 2 (Drosophila)                                                                                                                                                              | -0.8607 | 0.0173 |
| 203641_s_at | COBLL1   | COBL-like 1                                                                                                                                                                                  | -2.9911 | 0      |
| 203642_s_at | COBLL1   | COBL-like 1                                                                                                                                                                                  | -2.101  | 0      |
| 203645_s_at | CD163    | CD163 molecule                                                                                                                                                                               | -2.9706 | 0.0001 |
| 203646_at   | FDX1     | ferredoxin 1                                                                                                                                                                                 | -0.6882 | 0.0251 |
| 203647_s_at | FDX1     | ferredoxin 1                                                                                                                                                                                 | -0.8616 | 0.0072 |
| 203650_at   | PROCR    | protein C receptor; endothelial (EPCR)                                                                                                                                                       | -0.5836 | 0.0305 |
| 203657_s_at | CTSF     | cathepsin F                                                                                                                                                                                  | -1.4884 | 0.0001 |
| 203658_at   | SLC25A20 | solute carrier family 25 (carnitine/acylcarnitine translocase); member 20                                                                                                                    | -0.9657 | 0.0003 |
| 203661_s_at | TMOD1    | tropomodulin 1                                                                                                                                                                               | -2.7978 | 0      |
| 203662_s_at | TMOD1    | tropomodulin 1                                                                                                                                                                               | -3.3048 | 0      |
| 203666_at   | CXCL12   | chemokine (C-X-C motif) ligand 12 (stromal cell-derived factor 1)                                                                                                                            | -2.1494 | 0      |
| 203668_at   | MAN2C1   | mannosidase; alpha; class 2C; member 1                                                                                                                                                       | -1.2785 | 0      |
| 203669_s_at | DGAT1    | diacylglycerol O-acyltransferase homolog 1 (mouse)                                                                                                                                           | -1.497  | 0.0018 |
| 203671_at   | TPMT     | thiopurine S-methyltransferase                                                                                                                                                               | -0.5721 | 0.0005 |
| 203672_x_at | TPMT     | thiopurine S-methyltransferase                                                                                                                                                               | -0.7712 | 0.0001 |
| 203673_at   | TG       | thyroglobulin                                                                                                                                                                                | -0.3238 | 0.0031 |
| 203682_s_at | IVD      | isovaleryl Coenzyme A dehydrogenase                                                                                                                                                          | -0.6639 | 0.0486 |

|             |           |                                                                                  |         |        |
|-------------|-----------|----------------------------------------------------------------------------------|---------|--------|
| 203688_at   | PKD2      | polycystic kidney disease 2 (autosomal dominant)                                 | -0.8109 | 0.0031 |
| 203699_s_at | DIO2      | deiodinase; iodothyronine; type II                                               | -1.223  | 0      |
| 203700_s_at | DIO2      | deiodinase; iodothyronine; type II                                               | -1.5091 | 0      |
| 203704_s_at |           |                                                                                  | -0.4822 | 0.0003 |
| 203711_s_at | HIBCH     | 3-hydroxyisobutyryl-Coenzyme A hydrolase                                         | -1.6332 | 0      |
| 203733_at   | DEXI      | dexamethasone-induced transcript                                                 | -0.8049 | 0.0149 |
| 203749_s_at | RARA      | retinoic acid receptor; alpha                                                    | -1.4124 | 0      |
| 203751_x_at | JUND      | jun D proto-oncogene                                                             | -0.6963 | 0.0432 |
| 203756_at   | ARHGEF17  | Rho guanine nucleotide exchange factor (GEF) 17                                  | -0.3837 | 0.0032 |
| 203759_at   | ST3GAL4   | ST3 beta-galactoside alpha-2,3-sialyltransferase 4                               | -1.1018 | 0      |
| 203760_s_at | SLA       | Src-like-adaptor                                                                 | -1.2414 | 0.0003 |
| 203761_at   | SLA       | Src-like-adaptor                                                                 | -2.7188 | 0      |
| 203766_s_at | LMOD1     | leiomodlin 1 (smooth muscle)                                                     | -4.4445 | 0      |
| 203781_at   | MRPL33    | mitochondrial ribosomal protein L33                                              | -1.0545 | 0      |
| 203786_s_at | TPD52L1   | tumor protein D52-like 1                                                         | -1.3716 | 0.0044 |
| 203793_x_at | PCGF2     | polycomb group ring finger 2                                                     | -0.3683 | 0.0315 |
| 203794_at   | CDC42BPA  | CDC42 binding protein kinase alpha (DMPK-like)                                   | -0.5932 | 0.0418 |
| 203797_at   | VSNL1     | visinin-like 1                                                                   | -2.5365 | 0.0016 |
| 203798_s_at | VSNL1     | visinin-like 1                                                                   | -2.216  | 0.0037 |
| 203799_at   | CD302     | CD302 molecule                                                                   | -2.2984 | 0      |
| 203801_at   | MRPS14    | mitochondrial ribosomal protein S14                                              | -0.7478 | 0.0042 |
| 203810_at   | DNAJB4    | DnaJ (Hsp40) homolog; subfamily B; member 4                                      | -0.8921 | 0.0027 |
| 203812_at   |           | CDNA clone IMAGE:5922621                                                         | -1.4535 | 0      |
| 203813_s_at | SLIT3     | slit homolog 3 (Drosophila)                                                      | -1.3778 | 0.0004 |
| 203814_s_at | NQO2      | NAD(P)H dehydrogenase; quinone 2                                                 | -0.9894 | 0.0041 |
| 203821_at   | HBEGF     | heparin-binding EGF-like growth factor                                           | -1.2611 | 0.0034 |
| 203826_s_at | PITPNM1   | phosphatidylinositol transfer protein; membrane-associated 1                     | -1.0401 | 0.0001 |
| 203835_at   | LRRC32    | leucine rich repeat containing 32                                                | -2.3679 | 0      |
| 203836_s_at | MAP3K5    | mitogen-activated protein kinase kinase kinase 5                                 | -1.9337 | 0.0001 |
| 203837_at   | LOC729144 | hypothetical protein LOC729144, mitogen-activated protein kinase kinase kinase 5 | -1.6017 | 0      |
| 203838_s_at | TNK2      | tyrosine kinase; non-receptor; 2                                                 | -0.224  | 0.0191 |
| 203851_at   | IGFBP6    | insulin-like growth factor binding protein 6                                     | -4.1769 | 0      |
| 203860_at   | PCCA      | propionyl Coenzyme A carboxylase; alpha polypeptide                              | -1.1785 | 0.0005 |
| 203866_at   | NLE1      | notchless homolog 1 (Drosophila)                                                 | -0.2255 | 0      |
| 203867_s_at | NLE1      | notchless homolog 1 (Drosophila)                                                 | -0.3353 | 0.0312 |
| 203869_at   | USP46     | ubiquitin specific peptidase 46                                                  | -0.9408 | 0.0027 |

|             |         |                                                                                                   |         |        |
|-------------|---------|---------------------------------------------------------------------------------------------------|---------|--------|
| 203870_at   | USP46   | ubiquitin specific peptidase 46                                                                   | -0.7921 | 0.0082 |
| 203874_s_at | SMARCA1 | SWI/SNF related; matrix associated; actin dependent regulator of chromatin; subfamily a; member 1 | -0.8923 | 0.0099 |
| 203875_at   | SMARCA1 | SWI/SNF related; matrix associated; actin dependent regulator of chromatin; subfamily a; member 1 | -0.6604 | 0.0447 |
| 203877_at   |         |                                                                                                   | -0.1577 | 0.0052 |
| 203881_s_at | DMD     | dystrophin (muscular dystrophy; Duchenne and Becker types)                                        | -1.8686 | 0.0023 |
| 203887_s_at | THBD    | thrombomodulin                                                                                    | -2.0684 | 0.0016 |
| 203888_at   | THBD    | thrombomodulin                                                                                    | -1.3654 | 0.0016 |
| 203897_at   | LYRM1   | LYR motif containing 1                                                                            | -0.6466 | 0.0137 |
| 203903_s_at | HEPH    | hephaestin                                                                                        | -2.8606 | 0.0008 |
| 203911_at   | RAP1GAP | RAP1 GTPase activating protein                                                                    | -1.2869 | 0.0054 |
| 203916_at   | NDST2   | N-deacetylase/N-sulfotransferase (heparan glucosaminyl) 2                                         | -0.4662 | 0.0133 |
| 203920_at   | NR1H3   | nuclear receptor subfamily 1; group H; member 3                                                   | -1.5613 | 0.0004 |
| 203922_s_at | CYBB    | cytochrome b-245; beta polypeptide (chronic granulomatous disease)                                | -0.5863 | 0.0307 |
| 203923_s_at | CYBB    | cytochrome b-245; beta polypeptide (chronic granulomatous disease)                                | -2.5812 | 0      |
| 203924_at   | GSTA1   | glutathione S-transferase A1                                                                      | -3.5296 | 0.004  |
| 203925_at   | GCLM    | glutamate-cysteine ligase; modifier subunit                                                       | -1.3266 | 0.0014 |
| 203932_at   | HLA-DMB | major histocompatibility complex; class II; DM beta                                               | -1.5143 | 0.0027 |
| 203934_at   | KDR     | kinase insert domain receptor (a type III receptor tyrosine kinase)                               | -0.9921 | 0.0158 |
| 203941_at   | INTS9   | integrator complex subunit 9                                                                      | -0.9131 | 0.0084 |
| 203946_s_at | ARG2    | arginase; type II                                                                                 | -1.7414 | 0.0219 |
| 203949_at   | MPO     | myeloperoxidase                                                                                   | -0.1419 | 0.0008 |
| 203951_at   | CNN1    | calponin 1; basic; smooth muscle                                                                  | -1.1657 | 0      |
| 203960_s_at | C1orf41 | chromosome 1 open reading frame 41                                                                | -0.8087 | 0.0011 |
| 203970_s_at | PEX3    | peroxisomal biogenesis factor 3                                                                   | -0.7931 | 0.004  |
| 203972_s_at | PEX3    | peroxisomal biogenesis factor 3                                                                   | -0.8221 | 0.0254 |
| 203973_s_at | CEBPD   | CCAAT/enhancer binding protein (C/EBP); delta                                                     | -1.258  | 0.0001 |
| 203980_at   | FABP4   | fatty acid binding protein 4; adipocyte                                                           | -2.5515 | 0.0092 |
| 203982_s_at | ABCD4   | ATP-binding cassette; sub-family D (ALD); member 4                                                | -0.1762 | 0.0059 |
| 203984_s_at | CASP9   | caspase 9; apoptosis-related cysteine peptidase                                                   | -3.8023 | 0      |
| 203996_s_at | C21orf2 | chromosome 21 open reading frame 2                                                                | -0.2032 | 0.0324 |
| 203999_at   | SYT1    | synaptotagmin I                                                                                   | -1.1236 | 0.0091 |
| 204002_s_at | ICA1    | islet cell autoantigen 1; 69kDa                                                                   | -0.2565 | 0.0002 |
| 204004_at   | PAWR    | PRKC; apoptosis; WT1; regulator                                                                   | -1.7464 | 0.0047 |
| 204011_at   | SPRY2   | sprouty homolog 2 (Drosophila)                                                                    | -1.4799 | 0.001  |



|             |          |                                                                                  |         |        |
|-------------|----------|----------------------------------------------------------------------------------|---------|--------|
| 204018_x_at | HBA1     | hemoglobin; alpha 1, hemoglobin; alpha 2                                         | -1.3636 | 0.0245 |
| 204025_s_at | PDCD2    | programmed cell death 2                                                          | -0.7403 | 0.0034 |
| 204034_at   | ETHE1    | ethylmalonic encephalopathy 1                                                    | -1.1793 | 0.0038 |
| 204036_at   | EDG2     | endothelial differentiation; lysophosphatidic acid G-protein-coupled receptor; 2 | -2.601  | 0.0006 |
| 204037_at   | EDG2     | endothelial differentiation; lysophosphatidic acid G-protein-coupled receptor; 2 | -1.0254 | 0.0018 |
| 204038_s_at | EDG2     | endothelial differentiation; lysophosphatidic acid G-protein-coupled receptor; 2 | -0.6934 | 0.0111 |
| 204040_at   | RNF144A  | ring finger protein 144A                                                         | -0.8284 | 0.0148 |
| 204041_at   | MAOB     | monoamine oxidase B                                                              | -1.7016 | 0.0311 |
| 204043_at   | TCN2     | transcobalamin II; macrocytic anemia                                             | -0.9281 | 0.0019 |
| 204046_at   | PLCB2    | phospholipase C; beta 2                                                          | -0.2465 | 0.033  |
| 204048_s_at | PHACTR2  | phosphatase and actin regulator 2                                                | -0.9457 | 0.0289 |
| 204049_s_at | PHACTR2  | phosphatase and actin regulator 2                                                | -1.0113 | 0.0218 |
| 204057_at   | IRF8     | interferon regulatory factor 8                                                   | -1.6558 | 0.0001 |
| 204067_at   | SUOX     | sulfite oxidase                                                                  | -1.2707 | 0.0007 |
| 204070_at   | RARRES3  | retinoic acid receptor responder (tazarotene induced) 3                          | -1.5573 | 0.0032 |
| 204071_s_at | TOPORS   | topoisomerase I binding; arginine/serine-rich                                    | -0.4789 | 0.0252 |
| 204079_at   | TPST2    | tyrosylprotein sulfotransferase 2                                                | -0.8932 | 0.0359 |
| 204082_at   | PBX3     | pre-B-cell leukemia homeobox 3                                                   | -1.4359 | 0.0008 |
| 204083_s_at | TPM2     | tropomyosin 2 (beta)                                                             | -1.4336 | 0.0095 |
| 204085_s_at | CLN5     | ceroid-lipofuscinosis; neuronal 5                                                | -0.9373 | 0.0385 |
| 204093_at   | CCNH     | cyclin H                                                                         | -0.6469 | 0.0087 |
| 204105_s_at | NRCAM    | neuronal cell adhesion molecule                                                  | -2.8504 | 0.0025 |
| 204106_at   | TESK1    | testis-specific kinase 1                                                         | -0.9484 | 0.0079 |
| 204111_at   | HNMT     | histamine N-methyltransferase                                                    | -0.2576 | 0.0016 |
| 204112_s_at | HNMT     | histamine N-methyltransferase                                                    | -2.3823 | 0.0005 |
| 204121_at   | GADD45G  | growth arrest and DNA-damage-inducible; gamma                                    | -0.9315 | 0.0119 |
| 204122_at   | TYROBP   | TYRO protein tyrosine kinase binding protein                                     | -1.8785 | 0.0014 |
| 204135_at   | FILIP1L  | filamin A interacting protein 1-like                                             | -2.2307 | 0.001  |
| 204142_at   | ENOSF1   | enolase superfamily member 1                                                     | -0.8866 | 0.0001 |
| 204143_s_at | ENOSF1   | enolase superfamily member 1                                                     | -1.0162 | 0.0003 |
| 204150_at   | STAB1    | stabilin 1                                                                       | -3.2391 | 0      |
| 204153_s_at | MFNG     | MFNG O-fucosylpeptide 3-beta-N-acetylglucosaminyltransferase                     | -0.9246 | 0      |
| 204155_s_at | KIAA0999 | KIAA0999 protein                                                                 | -0.3887 | 0.0187 |
| 204157_s_at | KIAA0999 | KIAA0999 protein                                                                 | -0.9107 | 0.0069 |
| 204158_s_at | TCIRG1   | T-cell; immune regulator 1; ATPase; H+ transporting; lysosomal V0 subunit A3     | -2.112  | 0.0075 |

|             |          |                                                                                          |         |        |
|-------------|----------|------------------------------------------------------------------------------------------|---------|--------|
| 204160_s_at | ENPP4    | ectonucleotide pyrophosphatase/phosphodiesterase 4 (putative function)                   | -1.4276 | 0.0312 |
| 204163_at   | EMILIN1  | elastin microfibril interfacier 1                                                        | -1.1464 | 0      |
| 204167_at   | BTD      | biotinidase                                                                              | -0.6495 | 0.0003 |
| 204174_at   | ALOX5AP  | arachidonate 5-lipoxygenase-activating protein                                           | -2.8845 | 0.0002 |
| 204183_s_at | ADRBK2   | adrenergic; beta; receptor kinase 2                                                      | -0.3007 | 0.0265 |
| 204187_at   | GMPR     | guanosine monophosphate reductase                                                        | -1.2179 | 0.0012 |
| 204193_at   | CHKB     | carnitine palmitoyltransferase 1B (muscle), choline kinase beta                          | -1.3201 | 0.0002 |
| 204205_at   | APOBEC3G | apolipoprotein B mRNA editing enzyme; catalytic polypeptide-like 3G                      | -1.9937 | 0.0007 |
| 204213_at   | PIGR     | polymeric immunoglobulin receptor                                                        | -0.2215 | 0.011  |
| 204218_at   | C11orf51 | chromosome 11 open reading frame 51                                                      | -1.1237 | 0      |
| 204220_at   | GMFG     | glia maturation factor; gamma                                                            | -0.9372 | 0.0133 |
| 204223_at   | PRELP    | proline/arginine-rich end leucine-rich repeat protein                                    | -2.8009 | 0      |
| 204225_at   | HDAC4    | histone deacetylase 4                                                                    | -0.8867 | 0.0482 |
| 204231_s_at | FAAH     | fatty acid amide hydrolase                                                               | -0.5642 | 0.0005 |
| 204232_at   | FCER1G   | Fc fragment of IgE; high affinity I; receptor for; gamma polypeptide                     | -2.2664 | 0.0005 |
| 204238_s_at | C6orf108 | chromosome 6 open reading frame 108                                                      | -1.2285 | 0.0005 |
| 204239_s_at | NNAT     | neuronatin                                                                               | -0.2944 | 0.0006 |
| 204258_at   | CHD1     | chromodomain helicase DNA binding protein 1                                              | -1.2069 | 0      |
| 204264_at   | CPT2     | carnitine palmitoyltransferase II                                                        | -0.6189 | 0.007  |
| 204265_s_at | GPSM3    | G-protein signaling modulator 3 (AGS3-like; C. elegans)                                  | -0.8837 | 0.0192 |
| 204271_s_at | EDNRB    | endothelin receptor type B                                                               | -1.6084 | 0.0155 |
| 204273_at   | EDNRB    | endothelin receptor type B                                                               | -2.229  | 0.0011 |
| 204288_s_at | SORBS2   | sorbin and SH3 domain containing 2                                                       | -2.2884 | 0.0014 |
| 204290_s_at | ALDH6A1  | aldehyde dehydrogenase 6 family; member A1                                               | -0.8611 | 0.0391 |
| 204294_at   | AMT      | aminomethyltransferase                                                                   | -3.011  | 0      |
| 204295_at   | SURF1    | surfeit 1                                                                                | -0.6345 | 0.0041 |
| 204297_at   | PIK3C3   | phosphoinositide-3-kinase; class 3                                                       | -0.3634 | 0.0307 |
| 204301_at   | KBTD11   | kelch repeat and BTB (POZ) domain containing 11                                          | -1.3829 | 0.0255 |
| 204305_at   | MIPEP    | mitochondrial intermediate peptidase                                                     | -0.5344 | 0.0355 |
| 204307_at   | KIAA0329 | KIAA0329                                                                                 | -0.3953 | 0.0017 |
| 204310_s_at | NPR2     | natriuretic peptide receptor B/guanylate cyclase B (atrionatriuretic peptide receptor B) | -0.8365 | 0.0006 |
| 204319_s_at | RGS10    | regulator of G-protein signaling 10                                                      | -1.3383 | 0.0173 |
| 204326_x_at | MT1X     | metallothionein 1X                                                                       | -0.9381 | 0.0061 |
| 204332_s_at | AGA      | aspartylglucosaminidase                                                                  | -0.956  | 0.0169 |

|             |         |                                                                                |         |        |
|-------------|---------|--------------------------------------------------------------------------------|---------|--------|
| 204336_s_at | RGS19   | regulator of G-protein signaling 19                                            | -0.9884 | 0.0051 |
| 204363_at   | F3      | coagulation factor III (thromboplastin; tissue factor)                         | -1.2225 | 0.0133 |
| 204367_at   | SP2     | Sp2 transcription factor                                                       | -0.4027 | 0.0047 |
| 204368_at   | SLCO2A1 | solute carrier organic anion transporter family; member 2A1                    | -3.827  | 0      |
| 204385_at   | KYNU    | kynureninase (L-kynurenine hydrolase)                                          | -0.3502 | 0.0024 |
| 204386_s_at | MRP63   | mitochondrial ribosomal protein 63                                             | -0.3015 | 0.036  |
| 204390_at   |         |                                                                                | -0.1666 | 0.0051 |
| 204392_at   | CAMK1   | calcium/calmodulin-dependent protein kinase I                                  | -2.9403 | 0      |
| 204396_s_at | GRK5    | G protein-coupled receptor kinase 5                                            | -1.9831 | 0.0021 |
| 204400_at   | EFS     | embryonal Fyn-associated substrate                                             | -0.6833 | 0.0031 |
| 204404_at   | SLC12A2 | solute carrier family 12 (sodium/potassium/chloride transporters); member 2    | -1.4542 | 0.012  |
| 204409_s_at | EIF1AY  | eukaryotic translation initiation factor 1A; Y-linked                          | -3.3156 | 0.0007 |
| 204410_at   | EIF1AY  | eukaryotic translation initiation factor 1A; Y-linked                          | -2.0633 | 0.0045 |
| 204412_s_at | NEFH    | neurofilament; heavy polypeptide 200kDa                                        | -1.1193 | 0.0127 |
| 204414_at   | LARGE   | like-glycosyltransferase                                                       | -0.1388 | 0.0187 |
| 204416_x_at | APOC1   | apolipoprotein C-I                                                             | -2.8878 | 0.0003 |
| 204417_at   | GALC    | galactosylceramidase                                                           | -0.6848 | 0.037  |
| 204418_x_at | GSTM2   | glutathione S-transferase M2 (muscle)                                          | -1.4421 | 0.0338 |
| 204420_at   | FOSL1   | FOS-like antigen 1                                                             | -0.9312 | 0.0005 |
| 204430_s_at | SLC2A5  | solute carrier family 2 (facilitated glucose/fructose transporter); member 5   | -1.8619 | 0.0003 |
| 204431_at   | TLE2    | transducin-like enhancer of split 2 (E(sp1) homolog; Drosophila)               | -0.9856 | 0      |
| 204436_at   | PLEKHQ1 | pleckstrin homology domain containing; family Q member 1                       | -1.0175 | 0.002  |
| 204437_s_at | FOLR1   | folate receptor 1 (adult)                                                      | -0.7376 | 0      |
| 204438_at   | MRC1    | mannose receptor; C type 1, mannose receptor; C type 1-like 1                  | -3.5147 | 0      |
| 204446_s_at | ALOX5   | arachidonate 5-lipoxygenase                                                    | -2.9644 | 0.0001 |
| 204451_at   | FZD1    | frizzled homolog 1 (Drosophila)                                                | -1.1295 | 0.0022 |
| 204457_s_at | GAS1    | growth arrest-specific 1                                                       | -1.7931 | 0.0004 |
| 204462_s_at | SLC16A2 | solute carrier family 16; member 2 (monocarboxylic acid transporter 8)         | -2.3685 | 0.0002 |
| 204470_at   | CXCL1   | chemokine (C-X-C motif) ligand 1 (melanoma growth stimulating activity; alpha) | -0.3412 | 0.0177 |
| 204472_at   | GEM     | GTP binding protein overexpressed in skeletal muscle                           | -2.6998 | 0      |
| 204476_s_at | PC      | pyruvate carboxylase                                                           | -2.0518 | 0      |
| 204480_s_at | C9orf16 | chromosome 9 open reading frame 16                                             | -0.6542 | 0.041  |
| 204485_s_at | TOM1L1  | target of myb1 (chicken)-like 1                                                | -0.9733 | 0.006  |

|             |               |                                                                                                                                 |         |        |
|-------------|---------------|---------------------------------------------------------------------------------------------------------------------------------|---------|--------|
| 204487_s_at | KCNQ1         | potassium voltage-gated channel; KQT-like subfamily; member 1                                                                   | -4.1956 | 0      |
| 204501_at   | NOV           | nephroblastoma overexpressed gene                                                                                               | -3.3997 | 0.0014 |
| 204503_at   | EVPL          | envoplakin                                                                                                                      | -0.1872 | 0.0346 |
| 204509_at   | CA12          | carbonic anhydrase XII                                                                                                          | -0.1682 | 0.0132 |
| 204516_at   | ATXN7         | ataxin 7                                                                                                                        | -0.6452 | 0.0012 |
| 204522_at   | DOM3Z         | dom-3 homolog Z (C. elegans)                                                                                                    | -1.3064 | 0.0001 |
| 204534_at   | VTN           | vitronectin                                                                                                                     | -1.9859 | 0.0045 |
| 204564_at   | PCGF3         | polycomb group ring finger 3                                                                                                    | -0.4853 | 0.0005 |
| 204567_s_at | ABCG1         | ATP-binding cassette; sub-family G (WHITE); member 1                                                                            | -2.4868 | 0.0005 |
| 204569_at   | ICK           | intestinal cell (MAK-like) kinase                                                                                               | -0.8081 | 0.0482 |
| 204570_at   | COX7A1        | cytochrome c oxidase subunit VIIa polypeptide 1 (muscle)                                                                        | -1.4595 | 0.0121 |
| 204575_s_at | LOC732415     | matrix metalloproteinase 19, similar to Matrix metalloproteinase-19 precursor (MMP-19) (Matrix metalloproteinase RASI) (MMP-18) | -1.3103 | 0.0085 |
| 204584_at   | L1CAM         | L1 cell adhesion molecule                                                                                                       | -0.7627 | 0.0107 |
| 204588_s_at | SLC7A7        | solute carrier family 7 (cationic amino acid transporter; y+ system); member 7                                                  | -1.1099 | 0.009  |
| 204610_s_at | CCDC85B       | coiled-coil domain containing 85B                                                                                               | -1.1059 | 0.0007 |
| 204613_at   | PLCG2         | phospholipase C; gamma 2 (phosphatidylinositol-specific)                                                                        | -1.4598 | 0.0105 |
| 204616_at   | UCHL3         | ubiquitin carboxyl-terminal esterase L3 (ubiquitin thiolesterase)                                                               | -0.8235 | 0.0083 |
| 204619_s_at | VCAN          | versican                                                                                                                        | -2.5271 | 0.0034 |
| 204620_s_at | VCAN          | versican                                                                                                                        | -2.629  | 0.0078 |
| 204621_s_at | NR4A2         | nuclear receptor subfamily 4; group A; member 2                                                                                 | -5.4471 | 0      |
| 204622_x_at | NR4A2         | nuclear receptor subfamily 4; group A; member 2                                                                                 | -5.7822 | 0      |
| 204623_at   | TFF3          | trefoil factor 3 (intestinal)                                                                                                   | -0.6157 | 0.0003 |
| 204629_at   | PARVB         | parvin; beta                                                                                                                    | -1.2706 | 0.0007 |
| 204636_at   | COL17A1       | collagen; type XVII; alpha 1                                                                                                    | -0.1479 | 0.0059 |
| 204637_at   | CGA           | glycoprotein hormones; alpha polypeptide                                                                                        | -0.2952 | 0      |
| 204642_at   | EDG1          | endothelial differentiation; sphingolipid G-protein-coupled receptor; 1                                                         | -0.5606 | 0.009  |
| 204646_at   | DPYD          | dihydropyrimidine dehydrogenase                                                                                                 | -2.29   | 0.0007 |
| 204664_at   | ALPP          | alkaline phosphatase; placental (Regan isozyme)                                                                                 | -0.1338 | 0.0345 |
| 204670_x_at | HLA-DRB1      | hypothetical protein LOC730415, major histocompatibility complex; class II; DR beta 1                                           | -1.9601 | 0.0027 |
| 204686_at   | IRS1          | insulin receptor substrate 1                                                                                                    | -1.6039 | 0.0004 |
| 204687_at   | DKFZP564O0823 | DKFZP564O0823 protein                                                                                                           | -1.8692 | 0.0001 |
| 204688_at   | SGCE          | sarcoglycan; epsilon                                                                                                            | -1.3708 | 0.0237 |
| 204690_at   | STX8          | syntaxin 8                                                                                                                      | -0.7974 | 0      |

|             |          |                                                                                       |         |        |
|-------------|----------|---------------------------------------------------------------------------------------|---------|--------|
| 204693_at   | CDC42EP1 | CDC42 effector protein (Rho GTPase binding) 1                                         | -0.9124 | 0.0155 |
| 204697_s_at | CHGA     | chromogranin A (parathyroid secretory protein 1)                                      | -2.3983 | 0.0004 |
| 204708_at   | MAPK4    | mitogen-activated protein kinase 4                                                    | -0.1783 | 0.0011 |
| 204718_at   | EPHB6    | EPH receptor B6                                                                       | -0.5494 | 0      |
| 204719_at   | ABCA8    | ATP-binding cassette; sub-family A (ABC1); member 8                                   | -2.6817 | 0.0033 |
| 204735_at   | PDE4A    | phosphodiesterase 4A; cAMP-specific (phosphodiesterase E2 dunce homolog; Drosophila)  | -1.3054 | 0.0001 |
| 204739_at   | CENPC1   | centromere protein C 1                                                                | -0.3812 | 0.0213 |
| 204743_at   | TAGLN3   | transgelin 3                                                                          | -0.5623 | 0.0046 |
| 204745_x_at | MT1G     | metallothionein 1G                                                                    | -1.5087 | 0      |
| 204748_at   | PTGS2    | prostaglandin-endoperoxide synthase 2 (prostaglandin G/H synthase and cyclooxygenase) | -2.5823 | 0.0001 |
| 204751_x_at | DSC2     | desmocollin 2                                                                         | -0.2177 | 0.0126 |
| 204753_s_at | HLF      | hepatic leukemia factor                                                               | -1.9421 | 0.0343 |
| 204754_at   | HLF      | hepatic leukemia factor                                                               | -1.8149 | 0.0081 |
| 204759_at   | RCBTB2   | regulator of chromosome condensation (RCC1) and BTB (POZ) domain containing protein 2 | -1.1448 | 0      |
| 204765_at   | ARHGEF5  | Rho guanine nucleotide exchange factor (GEF) 5                                        | -0.4906 | 0.0023 |
| 204781_s_at | FAS      | Fas (TNF receptor superfamily; member 6)                                              | -1.391  | 0.0068 |
| 204787_at   | VSIG4    | V-set and immunoglobulin domain containing 4                                          | -3.329  | 0      |
| 204788_s_at | PPOX     | protoporphyrinogen oxidase                                                            | -0.6651 | 0.0039 |
| 204793_at   | GPRASP1  | G protein-coupled receptor associated sorting protein 1                               | -1.6377 | 0.0021 |
| 204800_s_at | DHRS12   | dehydrogenase/reductase (SDR family) member 12                                        | -0.6478 | 0.0094 |
| 204813_at   | MAPK10   | mitogen-activated protein kinase 10                                                   | -1.1693 | 0.0308 |
| 204821_at   | BTN3A3   | butyrophilin; subfamily 3; member A3                                                  | -0.8702 | 0.0154 |
| 204823_at   | NAV3     | neuron navigator 3                                                                    | -3.2796 | 0      |
| 204829_s_at | FOLR2    | folate receptor 2 (fetal)                                                             | -2.2184 | 0      |
| 204834_at   | FGL2     | fibrinogen-like 2                                                                     | -1.5482 | 0.0008 |
| 204850_s_at | DCX      | doublecortin; lissencephaly; X-linked (doublecortin)                                  | -0.1338 | 0.0063 |
| 204851_s_at | DCX      | doublecortin; lissencephaly; X-linked (doublecortin)                                  | -0.1372 | 0.0097 |
| 204862_s_at | NME3     | non-metastatic cells 3; protein expressed in                                          | -0.6662 | 0.0487 |
| 204863_s_at | IL6ST    | interleukin 6 signal transducer (gp130; oncostatin M receptor)                        | -0.8791 | 0.042  |
| 204866_at   | PHF16    | PHD finger protein 16                                                                 | -1.2151 | 0.0032 |
| 204868_at   | ICT1     | immature colon carcinoma transcript 1                                                 | -0.6583 | 0.0153 |
| 204880_at   | MGMT     | O-6-methylguanine-DNA methyltransferase                                               | -0.7912 | 0.0087 |
| 204882_at   | ARHGAP25 | Rho GTPase activating protein 25                                                      | -0.535  | 0.0012 |

|             |           |                                                                                                                                                                   |         |        |
|-------------|-----------|-------------------------------------------------------------------------------------------------------------------------------------------------------------------|---------|--------|
| 204894_s_at | AOC3      | amine oxidase; copper containing 3 (vascular adhesion protein 1)                                                                                                  | -1.5973 | 0.0336 |
| 204896_s_at | PTGER4    | prostaglandin E receptor 4 (subtype EP4)                                                                                                                          | -0.1494 | 0.0008 |
| 204897_at   | PTGER4    | prostaglandin E receptor 4 (subtype EP4)                                                                                                                          | -3.8737 | 0      |
| 204904_at   | GJA4      | gap junction protein; alpha 4; 37kDa                                                                                                                              | -0.4331 | 0.0476 |
| 204906_at   | RPS6KA2   | ribosomal protein S6 kinase; 90kDa; polypeptide 2                                                                                                                 | -1.0104 | 0.0189 |
| 204908_s_at | BCL3      | B-cell CLL/lymphoma 3                                                                                                                                             | -0.6628 | 0.0254 |
| 204909_at   | DDX6      | DEAD (Asp-Glu-Ala-Asp) box polypeptide 6                                                                                                                          | -0.4527 | 0.0002 |
| 204911_s_at | TRIM3     | tripartite motif-containing 3                                                                                                                                     | -0.1476 | 0.0364 |
| 204912_at   | IL10RA    | interleukin 10 receptor; alpha                                                                                                                                    | -2.5362 | 0      |
| 204916_at   | RAMP1     | receptor (G protein-coupled) activity modifying protein 1                                                                                                         | -0.4453 | 0      |
| 204923_at   | CXorf9    | chromosome X open reading frame 9                                                                                                                                 | -1.2598 | 0.0008 |
| 204924_at   | TLR2      | toll-like receptor 2                                                                                                                                              | -1.1383 | 0.0063 |
| 204925_at   | CTNS      | cystinosis; nephropathic                                                                                                                                          | -0.8566 | 0.0056 |
| 204926_at   | INHBA     | inhibin; beta A                                                                                                                                                   | -0.1065 | 0.0267 |
| 204929_s_at | VAMP5     | vesicle-associated membrane protein 5 (myobrevin)                                                                                                                 | -1.8153 | 0.0003 |
| 204931_at   | TCF21     | transcription factor 21                                                                                                                                           | -1.9732 | 0      |
| 204932_at   | TNFRSF11B | tumor necrosis factor receptor superfamily; member 11b (osteoprotegerin)                                                                                          | -0.6286 | 0.0086 |
| 204933_s_at | TNFRSF11B | tumor necrosis factor receptor superfamily; member 11b (osteoprotegerin)                                                                                          | -0.5884 | 0.0017 |
| 204938_s_at | PLN       | phospholamban                                                                                                                                                     | -0.8896 | 0      |
| 204939_s_at | PLN       | phospholamban                                                                                                                                                     | -2.6934 | 0      |
| 204940_at   | PLN       | phospholamban                                                                                                                                                     | -1.2297 | 0.0002 |
| 204944_at   | PTPRG     | protein tyrosine phosphatase; receptor type; G                                                                                                                    | -1.3503 | 0.0117 |
| 204952_at   | LYPD3     | LY6/PLAUR domain containing 3                                                                                                                                     | -1.1756 | 0      |
| 204955_at   | SRPX      | sushi-repeat-containing protein; X-linked                                                                                                                         | -1.7784 | 0.0225 |
| 204956_at   | MTAP      | methylthioadenosine phosphorylase                                                                                                                                 | -0.3808 | 0.0006 |
| 204959_at   | MNDA      | myeloid cell nuclear differentiation antigen                                                                                                                      | -2.3569 | 0.0007 |
| 204961_s_at | NCF1      | neutrophil cytosolic factor 1; (chronic granulomatous disease; autosomal 1), neutrophil cytosolic factor 1B pseudogene, neutrophil cytosolic factor 1C pseudogene | -0.3678 | 0.0137 |
| 204963_at   | SSPN      | sarcospan (Kras oncogene-associated gene)                                                                                                                         | -1.3444 | 0.0019 |
| 204969_s_at | RDX       | radixin                                                                                                                                                           | -1.1152 | 0.0382 |
| 204971_at   | CSTA      | cystatin A (stefin A)                                                                                                                                             | -1.381  | 0.0343 |
| 204973_at   | GJB1      | gap junction protein; beta 1; 32kDa                                                                                                                               | -0.2077 | 0.0072 |
| 204979_s_at | SH3BGR    | SH3 domain binding glutamic acid-rich protein                                                                                                                     | -1.2104 | 0.0077 |
| 204984_at   | GPC4      | glypican 4                                                                                                                                                        | -1.3579 | 0.0274 |

|             |           |                                                                    |         |        |
|-------------|-----------|--------------------------------------------------------------------|---------|--------|
| 204985_s_at | TRAPPC6A  | trafficking protein particle complex 6A                            | -0.6723 | 0.035  |
| 204990_s_at | ITGB4     | integrin; beta 4                                                   | -0.2022 | 0.0181 |
| 204991_s_at | NF2       | neurofibromin 2 (bilateral acoustic neuroma)                       | -0.1928 | 0.013  |
| 205000_at   | DDX3Y     | DEAD (Asp-Glu-Ala-Asp) box polypeptide 3; Y-linked                 | -3.7682 | 0.0017 |
| 205007_s_at | CIB2      | calcium and integrin binding family member 2                       | -0.4289 | 0.0443 |
| 205008_s_at | CIB2      | calcium and integrin binding family member 2                       | -1.1344 | 0.0059 |
| 205011_at   | LOH11CR2A | loss of heterozygosity; 11; chromosomal region 2; gene A           | -1.3268 | 0.0148 |
| 205012_s_at | HAGH      | hydroxyacylglutathione hydrolase                                   | -1.0367 | 0.0065 |
| 205013_s_at | ADORA2A   | adenosine A2a receptor                                             | -0.2682 | 0.0034 |
| 205014_at   | FGFBP1    | fibroblast growth factor binding protein 1                         | -0.1559 | 0.0032 |
| 205019_s_at | VIPR1     | vasoactive intestinal peptide receptor 1                           | -0.7316 | 0      |
| 205021_s_at | FOXN3     | forkhead box N3                                                    | -0.4195 | 0      |
| 205022_s_at | FOXN3     | forkhead box N3                                                    | -0.6085 | 0.0237 |
| 205027_s_at | MAP3K8    | mitogen-activated protein kinase kinase kinase 8                   | -1.8687 | 0.0001 |
| 205029_s_at | FABP7     | fatty acid binding protein 7; brain                                | -0.1143 | 0.0019 |
| 205032_at   | ITGA2     | integrin; alpha 2 (CD49B; alpha 2 subunit of VLA-2 receptor)       | -0.916  | 0.0466 |
| 205052_at   | AUH       | AU RNA binding protein/enoyl-Coenzyme A hydratase                  | -0.9316 | 0.0023 |
| 205054_at   | NEB       | nebulin                                                            | -1.2901 | 0      |
| 205077_s_at | PIGF      | phosphatidylinositol glycan anchor biosynthesis; class F           | -0.6435 | 0.0008 |
| 205078_at   | PIGF      | phosphatidylinositol glycan anchor biosynthesis; class F           | -1.1551 | 0.0008 |
| 205080_at   | RARB      | retinoic acid receptor; beta                                       | -0.7647 | 0.0288 |
| 205082_s_at | AOX1      | aldehyde oxidase 1                                                 | -3.0199 | 0      |
| 205083_at   | AOX1      | aldehyde oxidase 1                                                 | -2.6958 | 0      |
| 205098_at   | CCR1      | chemokine (C-C motif) receptor 1                                   | -1.7783 | 0.0025 |
| 205099_s_at | CCR1      | chemokine (C-C motif) receptor 1                                   | -0.7717 | 0.0366 |
| 205102_at   | TMPRSS2   | transmembrane protease; serine 2                                   | -0.1922 | 0.0054 |
| 205116_at   | LAMA2     | laminin; alpha 2 (merosin; congenital muscular dystrophy)          | -1.2127 | 0.0042 |
| 205119_s_at | FPR1      | formyl peptide receptor 1                                          | -1.456  | 0.0152 |
| 205133_s_at | HSPE1     | heat shock 10kDa protein 1 (chaperonin 10)                         | -0.4872 | 0.0028 |
| 205136_s_at | NUFIP1    | nuclear fragile X mental retardation protein interacting protein 1 | -0.4411 | 0.0192 |
| 205137_x_at | USH1C     | Usher syndrome 1C (autosomal recessive; severe)                    | -0.1336 | 0.0304 |
| 205147_x_at | NCF4      | neutrophil cytosolic factor 4; 40kDa                               | -0.9094 | 0.0013 |
| 205154_at   | LRRN2     | leucine rich repeat neuronal 2                                     | -0.3031 | 0.0399 |
| 205155_s_at | SPTBN2    | spectrin; beta; non-erythrocytic 2                                 | -0.3204 | 0.0029 |
| 205160_at   | PEX11A    | Peroxisomal biogenesis factor 11A                                  | -0.8465 | 0.0027 |
| 205163_at   | MYLPF     | fast skeletal myosin light chain 2                                 | -0.1738 | 0.0386 |

|             |         |                                                                                                |         |        |
|-------------|---------|------------------------------------------------------------------------------------------------|---------|--------|
| 205168_at   | DDR2    | discoidin domain receptor family; member 2                                                     | -1.3594 | 0.0435 |
| 205177_at   | TNNI1   | troponin I type 1 (skeletal; slow)                                                             | -0.1628 | 0.0273 |
| 205184_at   | GNG4    | guanine nucleotide binding protein (G protein); gamma 4                                        | -0.3406 | 0.0007 |
| 205193_at   | MAFF    | v-maf musculoaponeurotic fibrosarcoma oncogene homolog F (avian)                               | -2.3728 | 0      |
| 205200_at   | CLEC3B  | C-type lectin domain family 3; member B                                                        | -3.1983 | 0      |
| 205203_at   | PLD1    | phospholipase D1; phosphatidylcholine-specific                                                 | -1.0989 | 0      |
| 205204_at   | NMB     | neuromedin B                                                                                   | -1.9946 | 0      |
| 205208_at   | ALDH1L1 | aldehyde dehydrogenase 1 family; member L1                                                     | -2.4187 | 0.0001 |
| 205225_at   | ESR1    | estrogen receptor 1                                                                            | -1.6156 | 0      |
| 205229_s_at | COCH    | coagulation factor C homolog; cochlin (Limulus polyphemus)                                     | -2.1296 | 0      |
| 205231_s_at | EPM2A   | epilepsy; progressive myoclonus type 2A; Lafora disease (laforin)                              | -0.579  | 0.0078 |
| 205234_at   | SLC16A4 | solute carrier family 16; member 4 (monocarboxylic acid transporter 5)                         | -1.3494 | 0      |
| 205241_at   | SCO2    | SCO cytochrome oxidase deficient homolog 2 (yeast)                                             | -1.2203 | 0.0058 |
| 205245_at   | PARD6A  | par-6 partitioning defective 6 homolog alpha (C. elegans)                                      | -0.3637 | 0.0029 |
| 205251_at   | PER2    | period homolog 2 (Drosophila)                                                                  | -0.8409 | 0.0187 |
| 205269_at   | LCP2    | lymphocyte cytosolic protein 2 (SH2 domain containing leukocyte protein of 76kDa)              | -1.9924 | 0.0001 |
| 205270_s_at | LCP2    | lymphocyte cytosolic protein 2 (SH2 domain containing leukocyte protein of 76kDa)              | -1.2902 | 0.0039 |
| 205275_at   | GTPBP1  | GTP binding protein 1                                                                          | -0.1481 | 0.0125 |
| 205276_s_at | GTPBP1  | GTP binding protein 1                                                                          | -0.226  | 0.049  |
| 205281_s_at | PIGA    | phosphatidylinositol glycan anchor biosynthesis; class A (paroxysmal nocturnal hemoglobinuria) | -1.0171 | 0.0019 |
| 205297_s_at | CD79B   | CD79b molecule; immunoglobulin-associated beta                                                 | -0.2251 | 0.0345 |
| 205303_at   | KCNJ8   | potassium inwardly-rectifying channel; subfamily J; member 8                                   | -2.0764 | 0      |
| 205304_s_at | KCNJ8   | potassium inwardly-rectifying channel; subfamily J; member 8                                   | -2.4313 | 0      |
| 205307_s_at | KMO     | kynurenine 3-monooxygenase (kynurenine 3-hydroxylase)                                          | -0.1936 | 0.003  |
| 205311_at   | DDC     | dopa decarboxylase (aromatic L-amino acid decarboxylase)                                       | -1.0696 | 0.0018 |
| 205312_at   | SPI1    | spleen focus forming virus (SFFV) proviral integration oncogene spi1                           | -0.2188 | 0.0378 |
| 205314_x_at | SNTB2   | syntrophin; beta 2 (dystrophin-associated protein A1; 59kDa; basic component 2)                | -0.1488 | 0.0466 |
| 205320_at   | APC2    | adenomatosis polyposis coli 2                                                                  | -0.174  | 0.0425 |
| 205322_s_at | MTF1    | metal-regulatory transcription factor 1                                                        | -1.041  | 0      |
| 205323_s_at | MTF1    | metal-regulatory transcription factor 1                                                        | -0.5811 | 0.0006 |



|             |         |                                                                                    |         |        |
|-------------|---------|------------------------------------------------------------------------------------|---------|--------|
| 205325_at   | PHYHIP  | phytanoyl-CoA 2-hydroxylase interacting protein                                    | -3.8157 | 0      |
| 205326_at   | RAMP3   | receptor (G protein-coupled) activity modifying protein 3                          | -1.5769 | 0.0006 |
| 205333_s_at | RCE1    | RCE1 homolog; prenyl protein peptidase ( <i>S. cerevisiae</i> )                    | -0.3076 | 0.0198 |
| 205334_at   | S100A1  | S100 calcium binding protein A1                                                    | -0.2178 | 0.0045 |
| 205353_s_at | PEBP1   | phosphatidylethanolamine binding protein 1                                         | -0.4896 | 0.0025 |
| 205356_at   | USP13   | ubiquitin specific peptidase 13 (isopeptidase T-3)                                 | -1.6472 | 0      |
| 205357_s_at | AGTR1   | angiotensin II receptor; type 1                                                    | -1.7866 | 0.0416 |
| 205360_at   |         |                                                                                    | -0.177  | 0.0179 |
| 205364_at   | ACOX2   | acyl-Coenzyme A oxidase 2; branched chain                                          | -1.269  | 0.0129 |
| 205382_s_at | CFD     | complement factor D (adipsin)                                                      | -3.0787 | 0      |
| 205384_at   | FXYD1   | FXYD domain containing ion transport regulator 1 (phospholemman)                   | -0.8662 | 0      |
| 205388_at   | TNNC2   | troponin C type 2 (fast)                                                           | -0.4639 | 0.0003 |
| 205392_s_at | CCL14   | chemokine (C-C motif) ligand 14, chemokine (C-C motif) ligand 15                   | -2.9977 | 0      |
| 205404_at   | HSD11B1 | hydroxysteroid (11-beta) dehydrogenase 1                                           | -1.6272 | 0      |
| 205407_at   | RECK    | reversion-inducing-cysteine-rich protein with kazal motifs                         | -0.934  | 0.002  |
| 205409_at   | FOSL2   | FOS-like antigen 2                                                                 | -1.6564 | 0      |
| 205412_at   | ACAT1   | acetyl-Coenzyme A acetyltransferase 1 (acetoacetyl Coenzyme A thiolase)            | -1.0147 | 0      |
| 205417_s_at | DAG1    | dystroglycan 1 (dystrophin-associated glycoprotein 1)                              | -0.4222 | 0.028  |
| 205418_at   | FES     | feline sarcoma oncogene                                                            | -0.6179 | 0      |
| 205419_at   | EBI2    | Epstein-Barr virus induced gene 2 (lymphocyte-specific G protein-coupled receptor) | -1.614  | 0.0043 |
| 205420_at   | PEX7    | peroxisomal biogenesis factor 7                                                    | -0.908  | 0.0007 |
| 205421_at   | SLC22A3 | solute carrier family 22 (extraneuronal monoamine transporter); member 3           | -1.4005 | 0.0191 |
| 205423_at   | AP1B1   | adaptor-related protein complex 1; beta 1 subunit                                  | -0.8015 | 0.0008 |
| 205440_s_at | NPY1R   | neuropeptide Y receptor Y1                                                         | -3.9671 | 0      |
| 205471_s_at | DACH1   | dachshund homolog 1 ( <i>Drosophila</i> )                                          | -1.6501 | 0.0399 |
| 205475_at   | SCRG1   | scrapie responsive protein 1                                                       | -0.3343 | 0.0011 |
| 205478_at   | PPP1R1A | protein phosphatase 1; regulatory (inhibitor) subunit 1A                           | -0.7264 | 0.0002 |
| 205487_s_at | VGLL1   | vestigial like 1 ( <i>Drosophila</i> )                                             | -0.1609 | 0.0105 |
| 205490_x_at | GJB3    | gap junction protein; beta 3; 31kDa                                                | -0.126  | 0.0399 |
| 205491_s_at | GJB3    | gap junction protein; beta 3; 31kDa                                                | -0.1122 | 0.0375 |
| 205499_at   | SRPX2   | sushi-repeat-containing protein; X-linked 2                                        | -1.7456 | 0      |
| 205506_at   | VIL1    | villin 1                                                                           | -0.1518 | 0.0295 |
| 205508_at   | SCN1B   | sodium channel; voltage-gated; type I; beta                                        | -0.8937 | 0.0004 |

|             |          |                                                                                                        |         |        |
|-------------|----------|--------------------------------------------------------------------------------------------------------|---------|--------|
| 205518_s_at | CMAH     | cytidine monophosphate-N-acetylneuraminic acid hydroxylase (CMP-N-acetylneuraminic acid monooxygenase) | -1.2846 | 0.0042 |
| 205525_at   | CALD1    | caldesmon 1                                                                                            | -1.5326 | 0.0009 |
| 205530_at   | ETFDH    | electron-transferring-flavoprotein dehydrogenase                                                       | -1.109  | 0.0001 |
| 205543_at   | HSPA4L   | heat shock 70kDa protein 4-like                                                                        | -0.6505 | 0.0454 |
| 205547_s_at | TAGLN    | transgelin                                                                                             | -2.979  | 0      |
| 205550_s_at | BRE      | brain and reproductive organ-expressed (TNFRSF1A modulator)                                            | -1.9464 | 0      |
| 205554_s_at | DNASE1L3 | deoxyribonuclease I-like 3                                                                             | -4.547  | 0      |
| 205557_at   | BPI      | bactericidal/permeability-increasing protein                                                           | -0.15   | 0.0421 |
| 205563_at   | KISS1    | KiSS-1 metastasis-suppressor                                                                           | -0.1988 | 0.0128 |
| 205564_at   | PAGE4    | P antigen family; member 4 (prostate associated)                                                       | -0.3751 | 0.0081 |
| 205571_at   | LIPT1    | lipoyltransferase 1                                                                                    | -0.8933 | 0.0021 |
| 205577_at   | PYGM     | phosphorylase; glycogen; muscle (McArdle syndrome; glycogen storage disease type V)                    | -0.4338 | 0      |
| 205582_s_at | GGTLA1   | gamma-glutamyltransferase-like activity 1                                                              | -1.9103 | 0      |
| 205583_s_at | CXorf45  | chromosome X open reading frame 45                                                                     | -0.7799 | 0.0215 |
| 205589_at   | MYL3     | myosin; light chain 3; alkali; ventricular; skeletal; slow                                             | -0.1698 | 0      |
| 205609_at   | ANGPT1   | angiopoietin 1                                                                                         | -1.2212 | 0.0055 |
| 205611_at   | TNFSF12  | tumor necrosis factor (ligand) superfamily; member 12                                                  | -0.7971 | 0      |
| 205633_s_at | ALAS1    | aminolevulinate; delta-; synthase 1                                                                    | -1.7221 | 0      |
| 205639_at   | AOAH     | acyloxyacyl hydrolase (neutrophil)                                                                     | -0.5935 | 0.0337 |
| 205640_at   | ALDH3B1  | aldehyde dehydrogenase 3 family; member B1                                                             | -2.0828 | 0      |
| 205651_x_at | RAPGEF4  | Rap guanine nucleotide exchange factor (GEF) 4                                                         | -3.0702 | 0.0001 |
| 205653_at   | CTSG     | cathepsin G                                                                                            | -0.2225 | 0.0069 |
| 205657_at   | HAO      | 3-hydroxyanthranilate 3,4-dioxygenase                                                                  | -0.3193 | 0      |
| 205666_at   | FMO1     | flavin containing monooxygenase 1                                                                      | -1.6826 | 0.0071 |
| 205672_at   | XPA      | xeroderma pigmentosum; complementation group A                                                         | -0.4409 | 0.0296 |
| 205682_x_at | APOM     | apolipoprotein M                                                                                       | -0.6077 | 0      |
| 205692_s_at | CD38     | CD38 molecule                                                                                          | -0.6837 | 0.0023 |
| 205695_at   | SDS      | serine dehydratase                                                                                     | -1.4327 | 0.0098 |
| 205696_s_at | GFRA1    | GDNF family receptor alpha 1                                                                           | -0.1332 | 0.0487 |
| 205703_at   |          |                                                                                                        | -0.1018 | 0.0183 |
| 205711_x_at | ATP5C1   | ATP synthase; H+ transporting; mitochondrial F1 complex; gamma polypeptide 1                           | -0.2485 | 0.0309 |
| 205737_at   | KCNQ2    | potassium voltage-gated channel; KQT-like subfamily; member 2                                          | -0.2598 | 0.0118 |
| 205752_s_at | GSTM5    | glutathione S-transferase M5                                                                           | -0.972  | 0      |

|             |         |                                                                                                                           |         |        |
|-------------|---------|---------------------------------------------------------------------------------------------------------------------------|---------|--------|
| 205756_s_at | F8      | coagulation factor VIII; procoagulant component (hemophilia A)                                                            | -0.7943 | 0.0488 |
| 205768_s_at | SLC27A2 | solute carrier family 27 (fatty acid transporter); member 2                                                               | -1.5319 | 0.0364 |
| 205771_s_at | AKAP7   | A kinase (PRKA) anchor protein 7                                                                                          | -1.0356 | 0.0088 |
| 205776_at   | FMO5    | flavin containing monooxygenase 5                                                                                         | -1.0224 | 0.0001 |
| 205778_at   | KLK7    | kallikrein-related peptidase 7                                                                                            | -0.1466 | 0.0251 |
| 205786_s_at | ITGAM   | integrin; alpha M (complement component 3 receptor 3 subunit)                                                             | -2.1624 | 0      |
| 205790_at   | SKAP1   | src kinase associated phosphoprotein 1                                                                                    | -1.2461 | 0.0058 |
| 205814_at   | GRM3    | glutamate receptor; metabotropic 3                                                                                        | -0.4927 | 0.0009 |
| 205819_at   | MARCO   | macrophage receptor with collagenous structure                                                                            | -1.3578 | 0      |
| 205824_at   | HSPB2   | heat shock 27kDa protein 2                                                                                                | -0.3599 | 0.0007 |
| 205832_at   | CPA4    | carboxypeptidase A4                                                                                                       | -0.5135 | 0      |
| 205834_s_at | PART1   | prostate androgen-regulated transcript 1                                                                                  | -0.1459 | 0.0388 |
| 205838_at   | GYPA    | glycophorin A (MNS blood group)                                                                                           | -0.1091 | 0.0371 |
| 205839_s_at | BZRAP1  | benzodiazapine receptor (peripheral) associated protein 1                                                                 | -0.3879 | 0.02   |
| 205843_x_at | CRAT    | carnitine acetyltransferase                                                                                               | -0.314  | 0.0162 |
| 205846_at   | PTPRB   | protein tyrosine phosphatase; receptor type; B                                                                            | -1.0232 | 0      |
| 205853_at   | ZBTB7B  | zinc finger and BTB domain containing 7B                                                                                  | -0.2867 | 0.0051 |
| 205856_at   | SLC14A1 | solute carrier family 14 (urea transporter); member 1 (Kidd blood group)                                                  | -0.4265 | 0      |
| 205857_at   | SLC18A2 | solute carrier family 18 (vesicular monoamine); member 2                                                                  | -0.2904 | 0.0028 |
| 205858_at   | NGFR    | nerve growth factor receptor (TNFR superfamily; member 16)                                                                | -1.3077 | 0      |
| 205859_at   | LY86    | lymphocyte antigen 86                                                                                                     | -1.7174 | 0.0017 |
| 205866_at   | FCN3    | ficolin (collagen/fibrinogen domain containing) 3 (Hakata antigen)                                                        | -1.7644 | 0.0021 |
| 205877_s_at | ZC3H7B  | zinc finger CCCH-type containing 7B                                                                                       | -0.5584 | 0      |
| 205879_x_at | RET     | ret proto-oncogene                                                                                                        | -0.3477 | 0.0018 |
| 205894_at   | ARSE    | arylsulfatase E (chondrodysplasia punctata 1)                                                                             | -0.1304 | 0.0147 |
| 205896_at   | SLC22A4 | solute carrier family 22 (organic cation transporter); member 4                                                           | -0.589  | 0.0444 |
| 205907_s_at | OMD     | osteomodulin                                                                                                              | -2.2502 | 0      |
| 205908_s_at | OMD     | osteomodulin                                                                                                              | -1.6962 | 0      |
| 205911_at   | PTH1R   | parathyroid hormone receptor 1                                                                                            | -4.1114 | 0      |
| 205913_at   | PLIN    | perilipin                                                                                                                 | -1.4131 | 0      |
| 205914_s_at | GRIN1   | glutamate receptor; ionotropic; N-methyl D-aspartate 1, similar to glutamate receptor; ionotropic; N-methyl D-aspartate 1 | -0.2286 | 0.0322 |
| 205915_x_at | GRIN1   | glutamate receptor; ionotropic; N-methyl D-aspartate 1                                                                    | -0.1506 | 0.0391 |
| 205919_at   | HBE1    | hemoglobin; epsilon 1                                                                                                     | -0.1556 | 0.042  |
| 205933_at   | SETBP1  | SET binding protein 1                                                                                                     | -1.3979 | 0      |

|             |            |                                                                            |         |        |
|-------------|------------|----------------------------------------------------------------------------|---------|--------|
| 205934_at   | PLCL1      | phospholipase C-like 1                                                     | -0.9178 | 0.0099 |
| 205936_s_at | HK3        | hexokinase 3 (white cell)                                                  | -0.4503 | 0.0131 |
| 205944_s_at | CLTCL1     | clathrin; heavy chain-like 1                                               | -1.0914 | 0.0002 |
| 205954_at   | RXRG       | retinoid X receptor; gamma                                                 | -0.1797 | 0.0014 |
| 205969_at   | AADAC      | arylacetamide deacetylase (esterase)                                       | -5.9773 | 0      |
| 205977_s_at | EPHA1      | EPH receptor A1                                                            | -0.1717 | 0.0189 |
| 205982_x_at | SFTPC      | surfactant; pulmonary-associated protein C                                 | -0.1122 | 0.0166 |
| 205983_at   | DPEP1      | dipeptidase 1 (renal)                                                      | -0.2629 | 0.0003 |
| 205984_at   | CRHBP      | corticotropin releasing hormone binding protein                            | -1.7507 | 0      |
| 206001_at   | NPY        | neuropeptide Y                                                             | -0.5397 | 0      |
| 206002_at   | GPR64      | G protein-coupled receptor 64                                              | -0.2327 | 0.0023 |
| 206020_at   | SOCS6      | suppressor of cytokine signaling 6                                         | -0.4675 | 0.0064 |
| 206030_at   | ASPA       | aspartoacylase (Canavan disease)                                           | -1.3446 | 0.0015 |
| 206032_at   | DSC3       | desmocollin 3                                                              | -0.1532 | 0.029  |
| 206034_at   | SERPINB8   | serpin peptidase inhibitor; clade B (ovalbumin); member 8                  | -0.5725 | 0.005  |
| 206035_at   | REL        | v-rel reticuloendotheliosis viral oncogene homolog (avian)                 | -0.1609 | 0.0023 |
| 206036_s_at | REL        | v-rel reticuloendotheliosis viral oncogene homolog (avian)                 | -0.8967 | 0.0228 |
| 206045_s_at | NOL4       | nucleolar protein 4                                                        | -0.2011 | 0.0002 |
| 206050_s_at | RNH1       | ribonuclease/angiogenin inhibitor 1                                        | -0.4247 | 0.0039 |
| 206051_at   | ELAVL4     | ELAV (embryonic lethal; abnormal vision; Drosophila)-like 4 (Hu antigen D) | -0.5311 | 0.0001 |
| 206057_x_at | SPN        | sialophorin (leukosialin; CD43)                                            | -0.1664 | 0.0161 |
| 206065_s_at | DPYS       | dihydropyrimidinase                                                        | -1.9451 | 0      |
| 206066_s_at | RAD51C     | RAD51 homolog C (S. cerevisiae)                                            | -0.5504 | 0.0026 |
| 206072_at   | UCN        | urocortin                                                                  | -0.6313 | 0.0046 |
| 206080_at   | PLCH2      | phospholipase C; eta 2                                                     | -0.2445 | 0.0295 |
| 206085_s_at | CTH        | cystathionase (cystathionine gamma-lyase)                                  | -4.7201 | 0      |
| 206097_at   | SLC22A18AS | solute carrier family 22 (organic cation transporter); member 18 antisense | -0.1333 | 0.0171 |
| 206101_at   | ECM2       | extracellular matrix protein 2; female organ and adipocyte specific        | -1.9108 | 0.0123 |
| 206107_at   | RGS11      | regulator of G-protein signaling 11                                        | -0.1681 | 0.0335 |
| 206111_at   | RNASE2     | ribonuclease; RNase A family; 2 (liver; eosinophil-derived neurotoxin)     | -0.6696 | 0.0263 |
| 206115_at   | EGR3       | early growth response 3                                                    | -3.9831 | 0      |
| 206120_at   | CD33       | CD33 molecule                                                              | -0.7365 | 0.0002 |
| 206123_at   | LLGL1      | lethal giant larvae homolog 1 (Drosophila)                                 | -0.3839 | 0.003  |
| 206124_s_at | LLGL1      | lethal giant larvae homolog 1 (Drosophila)                                 | -0.133  | 0.0432 |

|             |         |                                                                                       |         |        |
|-------------|---------|---------------------------------------------------------------------------------------|---------|--------|
| 206126_at   | BLR1    | Burkitt lymphoma receptor 1; GTP binding protein (chemokine (C-X-C motif) receptor 5) | -0.1814 | 0.0476 |
| 206136_at   | FZD5    | frizzled homolog 5 (Drosophila)                                                       | -0.3463 | 0.0001 |
| 206137_at   | RIMS2   | regulating synaptic membrane exocytosis 2                                             | -1.3618 | 0.019  |
| 206154_at   | RLBP1   | retinaldehyde binding protein 1                                                       | -0.1208 | 0.0132 |
| 206158_s_at | CNBP    | CCHC-type zinc finger; nucleic acid binding protein                                   | -0.282  | 0.0058 |
| 206170_at   | ADRB2   | adrenergic; beta-2-; receptor; surface                                                | -0.2561 | 0.0223 |
| 206171_at   | ADORA3  | adenosine A3 receptor                                                                 | -2.0512 | 0      |
| 206179_s_at | TPPP    | tubulin polymerization promoting protein                                              | -0.1776 | 0.0482 |
| 206185_at   | CRYBB1  | crystallin; beta B1                                                                   | -0.3027 | 0.0003 |
| 206187_at   | PTGIR   | prostaglandin I2 (prostacyclin) receptor (IP)                                         | -0.4281 | 0      |
| 206189_at   | UNC5C   | unc-5 homolog C (C. elegans)                                                          | -0.3234 | 0.0374 |
| 206190_at   | GPR17   | G protein-coupled receptor 17                                                         | -0.1069 | 0.021  |
| 206195_x_at | GH2     | growth hormone 2                                                                      | -0.1687 | 0.0228 |
| 206203_at   | RCVRN   | recoverin                                                                             | -0.153  | 0.0172 |
| 206204_at   | GRB14   | growth factor receptor-bound protein 14                                               | -2.044  | 0.0121 |
| 206210_s_at | CETP    | cholesteryl ester transfer protein; plasma                                            | -0.3694 | 0.0443 |
| 206211_at   | SELE    | selectin E (endothelial adhesion molecule 1)                                          | -0.9899 | 0.0268 |
| 206212_at   | CPA2    | carboxypeptidase A2 (pancreatic)                                                      | -0.216  | 0.0032 |
| 206219_s_at | VAV1    | vav 1 guanine nucleotide exchange factor                                              | -0.3452 | 0.0008 |
| 206220_s_at | RASA3   | RAS p21 protein activator 3                                                           | -0.1502 | 0.0491 |
| 206233_at   | B4GALT6 | UDP-Gal:betaGlcNAc beta 1;4-galactosyltransferase; polypeptide 6                      | -2.0088 | 0      |
| 206242_at   | TM4SF5  | transmembrane 4 L six family member 5                                                 | -0.1363 | 0.0404 |
| 206243_at   | TIMP4   | TIMP metalloproteinase inhibitor 4                                                    | -2.6143 | 0      |
| 206244_at   | CR1     | complement component (3b/4b) receptor 1 (Knops blood group)                           | -0.134  | 0.0291 |
| 206250_x_at | AVPR1A  | arginine vasopressin receptor 1A                                                      | -0.1458 | 0.0104 |
| 206251_s_at | AVPR1A  | arginine vasopressin receptor 1A                                                      | -0.6976 | 0      |
| 206252_s_at | AVPR1A  | arginine vasopressin receptor 1A                                                      | -0.9471 | 0      |
| 206253_at   | DLG2    | discs; large homolog 2; chapsyn-110 (Drosophila)                                      | -0.602  | 0.0462 |
| 206255_at   | BLK     | B lymphoid tyrosine kinase                                                            | -0.1209 | 0.0402 |
| 206256_at   | CPN1    | carboxypeptidase N; polypeptide 1                                                     | -0.1682 | 0.0267 |
| 206270_at   | PRKCG   | protein kinase C; gamma                                                               | -0.1446 | 0.0142 |
| 206283_s_at | TAL1    | T-cell acute lymphocytic leukemia 1                                                   | -0.5807 | 0.0059 |
| 206289_at   | HOXA4   | homeobox A4                                                                           | -0.4336 | 0.0133 |
| 206290_s_at | RGS7    | regulator of G-protein signaling 7                                                    | -1.375  | 0.0261 |
| 206294_at   | HSD3B2  | hydroxy-delta-5-steroid dehydrogenase; 3 beta- and steroid delta-isomerase 2          | -3.7826 | 0.0009 |

|             |          |                                                                                  |         |        |
|-------------|----------|----------------------------------------------------------------------------------|---------|--------|
| 206295_at   | IL18     | interleukin 18 (interferon-gamma-inducing factor)                                | -0.7293 | 0.0103 |
| 206305_s_at | C8A      | complement component 8; alpha polypeptide                                        | -0.1904 | 0.0037 |
| 206309_at   | LECT1    | leukocyte cell derived chemotaxin 1                                              | -0.1804 | 0.0044 |
| 206313_at   | HLA-DOA  | major histocompatibility complex; class II; DO alpha                             | -0.3172 | 0.008  |
| 206315_at   | CRLF1    | cytokine receptor-like factor 1                                                  | -0.6529 | 0.0002 |
| 206323_x_at | OPHN1    | oligophrenin 1                                                                   | -0.2895 | 0.0074 |
| 206330_s_at | SHC3     | SHC (Src homology 2 domain containing) transforming protein 3                    | -1.2636 | 0.0001 |
| 206339_at   | CARTPT   | CART prepropeptide                                                               | -0.9346 | 0.0003 |
| 206341_at   | IL2RA    | interleukin 2 receptor; alpha                                                    | -0.1805 | 0.0285 |
| 206344_at   | PON1     | paraoxonase 1                                                                    | -0.3683 | 0.0002 |
| 206345_s_at | PON1     | paraoxonase 1                                                                    | -3.6453 | 0      |
| 206354_at   | SLCO1B3  | solute carrier organic anion transporter family; member 1B3                      | -0.1345 | 0.0239 |
| 206359_at   | SOCS3    | suppressor of cytokine signaling 3                                               | -1.1123 | 0.002  |
| 206360_s_at | SOCS3    | suppressor of cytokine signaling 3                                               | -0.3534 | 0.0041 |
| 206362_x_at | MAP3K10  | mitogen-activated protein kinase kinase kinase 10                                | -0.2027 | 0.0366 |
| 206363_at   | MAF      | v-maf musculoaponeurotic fibrosarcoma oncogene homolog (avian)                   | -1.351  | 0.0123 |
| 206380_s_at | CFP      | complement factor properdin                                                      | -0.8399 | 0      |
| 206395_at   | DGKG     | diacylglycerol kinase; gamma 90kDa                                               | -0.5565 | 0.0118 |
| 206399_x_at | CACNA1A  | calcium channel; voltage-dependent; P/Q type; alpha 1A subunit                   | -0.2594 | 0.0158 |
| 206407_s_at | CCL13    | chemokine (C-C motif) ligand 13                                                  | -0.8617 | 0      |
| 206417_at   | CNGA1    | cyclic nucleotide gated channel alpha 1                                          | -0.4012 | 0.0001 |
| 206421_s_at | SERPINB7 | serpin peptidase inhibitor; clade B (ovalbumin); member 7                        | -0.1477 | 0.0037 |
| 206423_at   | ANGPTL7  | angiopoietin-like 7                                                              | -0.1953 | 0      |
| 206428_s_at | ZNF143   | zinc finger protein 143                                                          | -0.1365 | 0.0034 |
| 206430_at   | CDX1     | caudal type homeobox 1                                                           | -0.3622 | 0.0001 |
| 206434_at   | SPOCK3   | sparc/osteonectin; cwcv and kazal-like domains proteoglycan (testican) 3         | -0.1408 | 0.033  |
| 206437_at   | EDG6     | endothelial differentiation; lysophosphatidic acid G-protein-coupled receptor; 6 | -0.2995 | 0.0199 |
| 206450_at   | DBH      | dopamine beta-hydroxylase (dopamine beta-monooxygenase)                          | -1.1984 | 0.0004 |
| 206453_s_at | NDRG2    | NDRG family member 2                                                             | -1.6297 | 0.0001 |
| 206458_s_at | WNT2B    | wingless-type MMTV integration site family; member 2B                            | -0.1708 | 0.0041 |
| 206459_s_at | WNT2B    | wingless-type MMTV integration site family; member 2B                            | -0.1205 | 0.0192 |
| 206461_x_at | MT1H     | metallothionein 1 pseudogene 2, metallothionein 1H                               | -0.876  | 0.0006 |
| 206462_s_at | NTRK3    | neurotrophic tyrosine kinase; receptor; type 3                                   | -0.2395 | 0      |

|             |          |                                                                                                                                                    |         |        |
|-------------|----------|----------------------------------------------------------------------------------------------------------------------------------------------------|---------|--------|
| 206465_at   | ACSBG1   | acyl-CoA synthetase bubblegum family member 1                                                                                                      | -1.609  | 0.0004 |
| 206466_at   | ACSBG1   | acyl-CoA synthetase bubblegum family member 1                                                                                                      | -0.2004 | 0.0068 |
| 206469_x_at | AKR7A3   | aldo-keto reductase family 7; member A3 (aflatoxin aldehyde reductase)                                                                             | -1.6039 | 0      |
| 206475_x_at | CSH1     | chorionic somatomammotropin hormone 1 (placental lactogen)                                                                                         | -0.1498 | 0.0025 |
| 206480_at   | LTC4S    | leukotriene C4 synthase                                                                                                                            | -0.551  | 0      |
| 206489_s_at | DLGAP1   | discs; large (Drosophila) homolog-associated protein 1                                                                                             | -0.6367 | 0      |
| 206490_at   | DLGAP1   | discs; large (Drosophila) homolog-associated protein 1                                                                                             | -0.8429 | 0      |
| 206492_at   | FHIT     | fragile histidine triad gene                                                                                                                       | -1.198  | 0.0141 |
| 206496_at   | FMO3     | flavin containing monooxygenase 3                                                                                                                  | -3.6079 | 0      |
| 206502_s_at | INSM1    | insulinoma-associated 1                                                                                                                            | -0.6967 | 0.0044 |
| 206525_at   | GABRR1   | gamma-aminobutyric acid (GABA) receptor; rho 1                                                                                                     | -0.1852 | 0      |
| 206538_at   | MRAS     | muscle RAS oncogene homolog                                                                                                                        | -1.0906 | 0      |
| 206540_at   | GLB1L    | galactosidase; beta 1-like                                                                                                                         | -0.4533 | 0.0015 |
| 206542_s_at | SMARCA2  | SWI/SNF related; matrix associated; actin dependent regulator of chromatin; subfamily a; member 2                                                  | -0.6431 | 0.0062 |
| 206549_at   | INSL4    | insulin-like 4 (placenta)                                                                                                                          | -0.1468 | 0.001  |
| 206552_s_at | TAC1     | tachykinin; precursor 1 (substance K; substance P; neurokinin 1; neurokinin 2; neuromedin L; neurokinin alpha; neuropeptide K; neuropeptide gamma) | -2.9932 | 0      |
| 206554_x_at | SETMAR   | SET domain and mariner transposase fusion gene                                                                                                     | -0.674  | 0.0083 |
| 206569_at   | IL24     | interleukin 24                                                                                                                                     | -0.1169 | 0.0104 |
| 206575_at   | CDKL5    | cyclin-dependent kinase-like 5                                                                                                                     | -0.155  | 0.0087 |
| 206577_at   | VIP      | vasoactive intestinal peptide                                                                                                                      | -0.1742 | 0.0056 |
| 206580_s_at | EFEMP2   | EGF-containing fibulin-like extracellular matrix protein 2                                                                                         | -1.9611 | 0.0002 |
| 206590_x_at | DRD2     | dopamine receptor D2                                                                                                                               | -0.1415 | 0.0092 |
| 206595_at   | CST6     | cystatin E/M                                                                                                                                       | -0.1247 | 0.0247 |
| 206598_at   | INS      | insulin                                                                                                                                            | -0.1435 | 0.0153 |
| 206608_s_at | RPGRIP1  | retinitis pigmentosa GTPase regulator interacting protein 1                                                                                        | -0.1069 | 0.0415 |
| 206610_s_at | F11      | coagulation factor XI (plasma thromboplastin antecedent)                                                                                           | -0.1722 | 0.0291 |
| 206612_at   | CACNG1   | calcium channel; voltage-dependent; gamma subunit 1                                                                                                | -0.3298 | 0.0003 |
| 206619_at   | DKK4     | dickkopf homolog 4 (Xenopus laevis)                                                                                                                | -0.1104 | 0.0095 |
| 206624_at   | USP9Y    | ubiquitin specific peptidase 9; Y-linked (fat facets-like; Drosophila)                                                                             | -1.3696 | 0.0311 |
| 206625_at   | PRPH2    | peripherin 2 (retinal degeneration; slow)                                                                                                          | -0.2992 | 0.0056 |
| 206629_at   | ADAMTSL2 | ADAMTS-like 2                                                                                                                                      | -1.1028 | 0      |
| 206634_at   | SIX3     | SIX homeobox 3                                                                                                                                     | -0.1526 | 0.0336 |

|             |         |                                                                                         |         |        |
|-------------|---------|-----------------------------------------------------------------------------------------|---------|--------|
| 206635_at   | CHRN2   | cholinergic receptor; nicotinic; beta 2 (neuronal)                                      | -0.2621 | 0.0091 |
| 206637_at   | P2RY14  | purinergic receptor P2Y; G-protein coupled; 14                                          | -0.5074 | 0.0469 |
| 206638_at   | HTR2B   | 5-hydroxytryptamine (serotonin) receptor 2B                                             | -4.2302 | 0      |
| 206642_at   | DSG1    | desmoglein 1                                                                            | -0.1199 | 0.0291 |
| 206648_at   | ZNF571  | zinc finger protein 571                                                                 | -2.7621 | 0      |
| 206662_at   | GLRX    | glutaredoxin (thioltransferase)                                                         | -0.8022 | 0.0003 |
| 206674_at   | FLT3    | fms-related tyrosine kinase 3                                                           | -0.1535 | 0.0116 |
| 206677_at   | KRT31   | keratin 31                                                                              | -0.2052 | 0.0039 |
| 206678_at   | GABRA1  | gamma-aminobutyric acid (GABA) A receptor; alpha 1                                      | -0.1567 | 0.0076 |
| 206682_at   | CLEC10A | C-type lectin domain family 10; member A                                                | -0.5466 | 0.0269 |
| 206689_x_at | HTATIP  | HIV-1 Tat interacting protein; 60kDa                                                    | -0.4321 | 0.0019 |
| 206690_at   | ACCN1   | amiloride-sensitive cation channel 1; neuronal (degenerin)                              | -0.3642 | 0      |
| 206692_at   | KCNJ10  | potassium inwardly-rectifying channel; subfamily J; member 10                           | -0.2204 | 0.0013 |
| 206699_x_at | NPAS1   | neuronal PAS domain protein 1                                                           | -0.172  | 0.0411 |
| 206700_s_at | JARID1D | jumonji; AT rich interactive domain 1D                                                  | -3.643  | 0.001  |
| 206702_at   | TEK     | TEK tyrosine kinase; endothelial (venous malformations; multiple cutaneous and mucosal) | -3.0319 | 0      |
| 206705_at   | TULP1   | tubby like protein 1                                                                    | -0.2078 | 0.0036 |
| 206706_at   | NTF3    | neurotrophin 3                                                                          | -0.3009 | 0      |
| 206710_s_at | EPB41L3 | erythrocyte membrane protein band 4.1-like 3                                            | -1.9514 | 0.0005 |
| 206714_at   | ALOX15B | arachidonate 15-lipoxygenase; type B                                                    | -0.706  | 0.0002 |
| 206716_at   | UMOD    | uromodulin (uromucoid; Tamm-Horsfall glycoprotein)                                      | -0.1066 | 0.0427 |
| 206726_at   | PGDS    | prostaglandin D2 synthase; hematopoietic                                                | -0.8354 | 0.0058 |
| 206728_at   | ECE2    | endothelin converting enzyme 2                                                          | -0.1948 | 0.0095 |
| 206729_at   | TNFRSF8 | tumor necrosis factor receptor superfamily; member 8                                    | -0.131  | 0.019  |
| 206737_at   | WNT11   | wingless-type MMTV integration site family; member 11                                   | -1.0932 | 0.0038 |
| 206767_at   | RBMS3   | RNA binding motif; single stranded interacting protein                                  | -0.8702 | 0.0085 |
| 206769_at   | TMSB4Y  | thymosin; beta 4; Y-linked                                                              | -0.359  | 0.0001 |
| 206771_at   | UPK3A   | uroplakin 3A                                                                            | -0.163  | 0.0203 |
| 206782_s_at | DNAJC4  | DnaJ (Hsp40) homolog; subfamily C; member 4                                             | -0.7922 | 0.0014 |
| 206790_s_at | NDUFB1  | NADH dehydrogenase (ubiquinone) 1 beta subcomplex; 1; 7kDa                              | -0.2237 | 0.0175 |
| 206793_at   | PNMT    | phenylethanolamine N-methyltransferase                                                  | -1.0508 | 0.0011 |
| 206795_at   | F2RL2   | coagulation factor II (thrombin) receptor-like 2                                        | -0.136  | 0.0049 |
| 206796_at   | WISP1   | WNT1 inducible signaling pathway protein 1                                              | -1.1122 | 0.0089 |
| 206800_at   | MTHFR   | 5;10-methylenetetrahydrofolate reductase (NADPH)                                        | -0.2953 | 0.0057 |



|             |          |                                                                                                           |         |        |
|-------------|----------|-----------------------------------------------------------------------------------------------------------|---------|--------|
| 206802_at   | PAX5     | paired box 5                                                                                              | -0.1601 | 0.039  |
| 206803_at   | PDYN     | prodynorphin                                                                                              | -0.1101 | 0.0224 |
| 206804_at   | CD3G     | CD3g molecule; gamma (CD3-TCR complex)                                                                    | -0.2542 | 0.0158 |
| 206815_at   | SPAG8    | sperm associated antigen 8                                                                                | -0.1594 | 0.0291 |
| 206816_s_at | SPAG8    | sperm associated antigen 8                                                                                | -0.2124 | 0.0279 |
| 206818_s_at | CNNM2    | cyclin M2                                                                                                 | -0.6607 | 0.0186 |
| 206826_at   | PMP2     | peripheral myelin protein 2                                                                               | -0.1694 | 0.0013 |
| 206831_s_at | ARSD     | arylsulfatase D                                                                                           | -0.1733 | 0.0327 |
| 206833_s_at | ACYP2    | acylphosphatase 2; muscle type                                                                            | -0.8251 | 0.0066 |
| 206839_at   | C22orf31 | chromosome 22 open reading frame 31                                                                       | -0.1782 | 0.0242 |
| 206844_at   | FBP2     | fructose-1,6-bisphosphatase 2                                                                             | -0.1857 | 0.0023 |
| 206848_at   | HOXA7    | homeobox A7                                                                                               | -1.0978 | 0.0398 |
| 206851_at   | RNASE3   | ribonuclease; RNase A family; 3 (eosinophil cationic protein)                                             | -0.1828 | 0.0092 |
| 206853_s_at | MAP3K7   | mitogen-activated protein kinase kinase kinase 7                                                          | -0.4516 | 0.0212 |
| 206867_at   | GCKR     | glucokinase (hexokinase 4) regulator                                                                      | -0.3491 | 0.0008 |
| 206868_at   | STARD8   | StAR-related lipid transfer (START) domain containing 8                                                   | -0.5518 | 0      |
| 206869_at   | CHAD     | chondroadherin                                                                                            | -2.0245 | 0      |
| 206878_at   | DAO      | D-amino-acid oxidase                                                                                      | -0.1191 | 0.0449 |
| 206880_at   | P2RXL1   | purinergic receptor P2X-like 1; orphan receptor                                                           | -0.2034 | 0.0074 |
| 206890_at   | IL12RB1  | interleukin 12 receptor; beta 1                                                                           | -0.159  | 0.0056 |
| 206894_at   | APOA4    | apolipoprotein A-IV                                                                                       | -0.1967 | 0.0446 |
| 206897_at   | PAGE1    | P antigen family; member 1 (prostate associated)                                                          | -0.3067 | 0      |
| 206898_at   | CDH19    | cadherin 19; type 2                                                                                       | -1.6907 | 0      |
| 206908_s_at | CLDN11   | claudin 11 (oligodendrocyte transmembrane protein)                                                        | -0.1518 | 0.0026 |
| 206910_x_at | CFHR2    | complement factor H-related 2                                                                             | -0.5571 | 0.0002 |
| 206931_at   | ZNF141   | zinc finger protein 141                                                                                   | -2.4523 | 0      |
| 206932_at   | CH25H    | cholesterol 25-hydroxylase                                                                                | -1.438  | 0      |
| 206936_x_at |          |                                                                                                           | -0.2621 | 0.0207 |
| 206939_at   | DCC      | deleted in colorectal carcinoma                                                                           | -0.1481 | 0.0069 |
| 206955_at   | AQP7     | aquaporin 7                                                                                               | -0.4166 | 0.0007 |
| 206963_s_at | NAT8     | N-acetyltransferase 8, N-acetyltransferase 8B (gene/pseudogene)                                           | -0.1617 | 0.0176 |
| 206973_at   | PPFIA2   | protein tyrosine phosphatase; receptor type; f polypeptide (PTPRF); interacting protein (liprin); alpha 2 | -0.1951 | 0.003  |
| 206982_at   | CRYBA1   | crystallin; beta A1                                                                                       | -0.1231 | 0.0367 |
| 206988_at   | CCL25    | chemokine (C-C motif) ligand 25                                                                           | -0.1411 | 0.0351 |
| 206993_at   | ATP5S    | ATP synthase; H+ transporting; mitochondrial F0 complex; subunit s (factor B)                             | -0.6062 | 0.0109 |

|             |           |                                                                                                    |         |        |
|-------------|-----------|----------------------------------------------------------------------------------------------------|---------|--------|
| 207006_s_at | CCDC106   | coiled-coil domain containing 106                                                                  | -0.6017 | 0.0069 |
| 207009_at   | PHOX2B    | paired-like homeobox 2b                                                                            | -0.4378 | 0.0013 |
| 207024_at   | CHRND     | cholinergic receptor; nicotinic; delta                                                             | -0.2294 | 0.0046 |
| 207025_at   | GJA12     | gap junction protein; alpha 12; 47kDa                                                              | -0.2625 | 0.0045 |
| 207027_at   | HGFAC     | HGF activator                                                                                      | -0.1426 | 0.0197 |
| 207028_at   | MYCNOS    | v-myc myelocytomatosis viral related oncogene; neuroblastoma derived (avian) opposite strand       | -0.1808 | 0.0084 |
| 207037_at   | TNFRSF11A | tumor necrosis factor receptor superfamily; member 11a; NFKB activator                             | -0.1623 | 0.0306 |
| 207040_s_at | ST13      | suppression of tumorigenicity 13 (colon carcinoma) (Hsp70 interacting protein)                     | -0.5545 | 0.0068 |
| 207043_s_at | SLC6A9    | solute carrier family 6 (neurotransmitter transporter; glycine); member 9                          | -1.2654 | 0.0013 |
| 207044_at   | THRB      | thyroid hormone receptor; beta (erythroblastic leukemia viral (v-erb-a) oncogene homolog 2; avian) | -0.2574 | 0.0002 |
| 207048_at   | SLC6A11   | solute carrier family 6 (neurotransmitter transporter; GABA); member 11                            | -0.1598 | 0.0102 |
| 207055_at   | GPR37L1   | G protein-coupled receptor 37 like 1                                                               | -0.123  | 0.0165 |
| 207058_s_at | PARK2     | Parkinson disease (autosomal recessive; juvenile) 2; parkin                                        | -0.2785 | 0.0145 |
| 207059_at   | PAX9      | paired box 9                                                                                       | -0.1377 | 0.0297 |
| 207061_at   | ERN1      | endoplasmic reticulum to nucleus signaling 1                                                       | -0.2817 | 0.0008 |
| 207063_at   | CYorf14   | chromosome Y open reading frame 14                                                                 | -1.3146 | 0      |
| 207070_at   | RGR       | retinal G protein coupled receptor                                                                 | -0.2564 | 0.0082 |
| 207071_s_at | ACO1      | aconitase 1; soluble                                                                               | -1.3982 | 0      |
| 207074_s_at | SLC18A1   | solute carrier family 18 (vesicular monoamine); member 1                                           | -0.5871 | 0.0031 |
| 207075_at   | NLRP3     | NLR family; pyrin domain containing 3                                                              | -0.2591 | 0.02   |
| 207082_at   | CSF1      | colony stimulating factor 1 (macrophage)                                                           | -0.4771 | 0.0001 |
| 207092_at   | LEP       | leptin (obesity homolog; mouse)                                                                    | -0.2396 | 0.0017 |
| 207095_at   | SLC10A2   | solute carrier family 10 (sodium/bile acid cotransporter family); member 2                         | -0.1378 | 0.0421 |
| 207113_s_at | TNF       | tumor necrosis factor (TNF superfamily; member 2)                                                  | -0.1666 | 0.004  |
| 207114_at   | LY6G6C    | lymphocyte antigen 6 complex; locus G6C                                                            | -0.1447 | 0.0231 |
| 207119_at   | PRKG1     | protein kinase; cGMP-dependent; type I                                                             | -0.4986 | 0.0009 |
| 207122_x_at | SULT1A2   | sulfotransferase family; cytosolic; 1A; phenol-preferring; member 2                                | -0.6673 | 0.0288 |
| 207131_x_at | GGT1      | gamma-glutamyltransferase 1                                                                        | -0.2021 | 0.0378 |
| 207138_at   | PHF2      | PHD finger protein 2                                                                               | -0.1263 | 0.0364 |
| 207139_at   | ATP4A     | ATPase; H+/K+ exchanging; alpha polypeptide                                                        | -1.9626 | 0.0093 |

|             |           |                                                                                         |         |        |
|-------------|-----------|-----------------------------------------------------------------------------------------|---------|--------|
| 207152_at   | NTRK2     | neurotrophic tyrosine kinase; receptor; type 2                                          | -0.1727 | 0.0079 |
| 207175_at   | ADIPOQ    | adiponectin; C1Q and collagen domain containing                                         | -2.5519 | 0      |
| 207191_s_at | ISLR      | immunoglobulin superfamily containing leucine-rich repeat                               | -1.742  | 0      |
| 207195_at   | CNTN6     | contactin 6                                                                             | -1.2302 | 0.0101 |
| 207205_at   | CEACAM4   | carcinoembryonic antigen-related cell adhesion molecule 4                               | -0.1646 | 0.0181 |
| 207212_at   | SLC9A3    | solute carrier family 9 (sodium/hydrogen exchanger); member 3                           | -0.1204 | 0.0034 |
| 207220_at   | ART4      | ADP-ribosyltransferase 4 (Dombrock blood group)                                         | -0.5548 | 0.0004 |
| 207224_s_at | SIGLEC7   | sialic acid binding Ig-like lectin 7                                                    | -0.6994 | 0.0128 |
| 207225_at   | AANAT     | arylalkylamine N-acetyltransferase                                                      | -0.1223 | 0.0002 |
| 207226_at   | HIST1H2BN | histone cluster 1; H2bn                                                                 | -0.1862 | 0.0071 |
| 207230_at   | CDON      | Cdon homolog (mouse)                                                                    | -0.2301 | 0.0001 |
| 207233_s_at | MITF      | microphthalmia-associated transcription factor                                          | -0.94   | 0.034  |
| 207237_at   | KCNA3     | potassium voltage-gated channel; shaker-related subfamily; member 3                     | -0.1162 | 0.0089 |
| 207252_at   | INE1      | inactivation escape 1                                                                   | -0.1868 | 0.0096 |
| 207259_at   | C17orf73  | chromosome 17 open reading frame 73                                                     | -0.1102 | 0.0237 |
| 207260_at   | FEV       | FEV (ETS oncogene family)                                                               | -0.2131 | 0.0228 |
| 207277_at   | CD209     | CD209 molecule                                                                          | -0.6786 | 0.0399 |
| 207302_at   | SGCG      | sarcoglycan; gamma (35kDa dystrophin-associated glycoprotein)                           | -0.2813 | 0.0003 |
| 207309_at   | NOS1      | nitric oxide synthase 1 (neuronal)                                                      | -0.2188 | 0.0213 |
| 207313_x_at | KIR3DL2   | killer cell immunoglobulin-like receptor; three domains; long cytoplasmic tail; 2       | -0.1901 | 0.0005 |
| 207330_at   | PZP       | pregnancy-zone protein                                                                  | -0.1326 | 0.0463 |
| 207349_s_at | UCP3      | uncoupling protein 3 (mitochondrial; proton carrier)                                    | -0.1906 | 0.0071 |
| 207355_at   | SLC1A7    | solute carrier family 1 (glutamate transporter); member 7                               | -0.1834 | 0.0206 |
| 207356_at   | DEFB4     | defensin; beta 4, defensin; beta 4; pseudogene                                          | -0.1336 | 0.046  |
| 207358_x_at | MACF1     | microtubule-actin crosslinking factor 1                                                 | -0.5707 | 0.0101 |
| 207363_at   | RS1       | retinoschisis (X-linked; juvenile) 1                                                    | -0.1191 | 0.0333 |
| 207364_at   | TEX28     | testis expressed 28, testis expressed 28 pseudogene 1, testis expressed 28 pseudogene 2 | -0.1732 | 0.0079 |
| 207368_at   | HTR1D     | 5-hydroxytryptamine (serotonin) receptor 1D                                             | -0.1344 | 0.0071 |
| 207376_at   | VENTX     | VENT homeobox homolog ( <i>Xenopus laevis</i> )                                         | -0.1533 | 0.0233 |
| 207377_at   | PPP1R2P9  | protein phosphatase 1; regulatory (inhibitor) subunit 2 pseudogene 9                    | -0.1738 | 0.0071 |
| 207390_s_at | SMTN      | smoothelin                                                                              | -1.283  | 0      |
| 207399_at   | BFSP2     | beaded filament structural protein 2; phakinin                                          | -0.1964 | 0.0055 |
| 207400_at   | NPY5R     | neuropeptide Y receptor Y5                                                              | -0.8692 | 0      |

|             |         |                                                                                                  |         |        |
|-------------|---------|--------------------------------------------------------------------------------------------------|---------|--------|
| 207403_at   | IRS4    | insulin receptor substrate 4                                                                     | -0.1172 | 0.0479 |
| 207422_at   | ADAM20  | ADAM metallopeptidase domain 20                                                                  | -0.1203 | 0.0362 |
| 207423_s_at | ADAM20  | ADAM metallopeptidase domain 20                                                                  | -0.1657 | 0.02   |
| 207428_x_at | CDC2L1  | cell division cycle 2-like 1 (PITSLRE proteins), cell division cycle 2-like 2 (PITSLRE proteins) | -0.4187 | 0.0103 |
| 207433_at   | IL10    | interleukin 10                                                                                   | -0.4669 | 0.0002 |
| 207441_at   | SMR3B   | submaxillary gland androgen regulated protein 3 homolog B (mouse)                                | -0.5196 | 0      |
| 207448_at   | POFUT2  | protein O-fucosyltransferase 2                                                                   | -0.1836 | 0.001  |
| 207459_x_at | GYPB    | glycophorin B (MNS blood group)                                                                  | -0.1296 | 0.0022 |
| 207462_at   | GLRA2   | glycine receptor; alpha 2                                                                        | -0.1409 | 0.0264 |
| 207468_s_at | SFRP5   | secreted frizzled-related protein 5                                                              | -0.2805 | 0.0003 |
| 207473_at   | MLN     | motilin                                                                                          | -0.1691 | 0.0176 |
| 207480_s_at | MEIS2   | Meis homeobox 2                                                                                  | -1.2268 | 0.0056 |
| 207490_at   | TUBA4B  | tubulin; alpha 4b (pseudogene)                                                                   | -0.1499 | 0.0467 |
| 207494_s_at | ZNF76   | zinc finger protein 76 (expressed in testis)                                                     | -0.3995 | 0.0041 |
| 207501_s_at | FGF12   | fibroblast growth factor 12                                                                      | -2.8042 | 0      |
| 207502_at   | GUCA2B  | guanylate cyclase activator 2B (uroguanylin)                                                     | -0.1225 | 0.0434 |
| 207505_at   | PRKG2   | protein kinase; cGMP-dependent; type II                                                          | -0.1755 | 0.0088 |
| 207511_s_at | C2orf24 | chromosome 2 open reading frame 24                                                               | -0.7779 | 0.0012 |
| 207517_at   | LAMC2   | laminin; gamma 2                                                                                 | -0.1738 | 0.0026 |
| 207519_at   | SLC6A4  | solute carrier family 6 (neurotransmitter transporter; serotonin); member 4                      | -0.1486 | 0.0349 |
| 207524_at   | ST7     | suppression of tumorigenicity 7                                                                  | -0.9006 | 0.0009 |
| 207526_s_at | IL1RL1  | interleukin 1 receptor-like 1                                                                    | -3.4915 | 0      |
| 207527_at   | KCNJ9   | potassium inwardly-rectifying channel; subfamily J; member 9                                     | -0.1501 | 0.026  |
| 207537_at   | PFKFB1  | 6-phosphofructo-2-kinase/fructose-2,6-biphosphatase 1                                            | -0.1519 | 0.0178 |
| 207538_at   | IL4     | interleukin 4                                                                                    | -0.1472 | 0.0059 |
| 207540_s_at | SYK     | spleen tyrosine kinase                                                                           | -0.6443 | 0.0065 |
| 207550_at   | MPL     | myeloproliferative leukemia virus oncogene                                                       | -0.2235 | 0.0001 |
| 207571_x_at | C1orf38 | chromosome 1 open reading frame 38                                                               | -1.6351 | 0.0029 |
| 207573_x_at | ATP5L   | ATP synthase; H+ transporting; mitochondrial F0 complex; subunit G                               | -0.5202 | 0.001  |
| 207574_s_at | GADD45B | growth arrest and DNA-damage-inducible; beta                                                     | -0.8156 | 0.0369 |
| 207576_x_at | OXT     | oxytocin; prepro- (neurophysin I)                                                                | -0.3655 | 0      |
| 207578_s_at | HTR4    | 5-hydroxytryptamine (serotonin) receptor 4                                                       | -0.2583 | 0.027  |
| 207585_s_at | RPL36AL | ribosomal protein L36a-like                                                                      | -0.4331 | 0.004  |
| 207587_at   | CRYGA   | crystallin; gamma A                                                                              | -0.133  | 0.0295 |

|             |          |                                                                                                      |         |        |
|-------------|----------|------------------------------------------------------------------------------------------------------|---------|--------|
| 207609_s_at | CYP1A2   | cytochrome P450; family 1; subfamily A; polypeptide 2                                                | -0.1879 | 0.0026 |
| 207613_s_at | CAMK2A   | calcium/calmodulin-dependent protein kinase (CaM kinase) II alpha                                    | -0.1469 | 0.0081 |
| 207618_s_at | BCS1L    | BCS1-like (yeast)                                                                                    | -0.6322 | 0.0211 |
| 207621_s_at | PEMT     | phosphatidylethanolamine N-methyltransferase                                                         | -0.6372 | 0.0017 |
| 207630_s_at | CREM     | cAMP responsive element modulator                                                                    | -2.8361 | 0      |
| 207632_at   | MUSK     | muscle; skeletal; receptor tyrosine kinase                                                           | -0.1306 | 0.0013 |
| 207635_s_at | KCNH1    | potassium voltage-gated channel; subfamily H (eag-related); member 1                                 | -0.1581 | 0.0232 |
| 207640_x_at | NTN2L    | netrin 2-like (chicken)                                                                              | -0.1715 | 0.0186 |
| 207643_s_at | TNFRSF1A | tumor necrosis factor receptor superfamily; member 1A                                                | -0.6191 | 0.0094 |
| 207648_at   | DRP2     | dystrophin related protein 2                                                                         | -0.2207 | 0.0073 |
| 207649_at   | KRT37    | keratin 37                                                                                           | -0.1068 | 0.0154 |
| 207652_s_at | CMKLR1   | chemokine-like receptor 1                                                                            | -0.254  | 0.0047 |
| 207656_s_at | ACOX1    | acyl-Coenzyme A oxidase 1; palmitoyl                                                                 | -0.1372 | 0.0071 |
| 207667_s_at | MAP2K3   | mitogen-activated protein kinase kinase 3                                                            | -0.462  | 0.0055 |
| 207670_at   | KRT85    | keratin 85                                                                                           | -0.1484 | 0.0033 |
| 207672_at   |          |                                                                                                      | -0.1686 | 0.0055 |
| 207677_s_at | NCF4     | neutrophil cytosolic factor 4; 40kDa                                                                 | -1.0559 | 0.0023 |
| 207679_at   | PAX3     | paired box 3                                                                                         | -0.1074 | 0.0259 |
| 207688_s_at | INHBC    | inhibin; beta C                                                                                      | -0.7662 | 0.0075 |
| 207689_at   | TBX10    | T-box 10                                                                                             | -0.1934 | 0.0015 |
| 207695_s_at | IGSF1    | immunoglobulin superfamily; member 1                                                                 | -0.2535 | 0.0369 |
| 207698_at   | C6orf123 | chromosome 6 open reading frame 123                                                                  | -0.1085 | 0.0358 |
| 207703_at   | NLGN4Y   | neuroligin 4; Y-linked                                                                               | -0.5368 | 0.0216 |
| 207752_x_at | PRB1     | proline-rich protein BstNI subfamily 1, proline-rich protein BstNI subfamily 2                       | -0.371  | 0.0059 |
| 207762_at   | LPAL2    | lipoprotein; Lp(a)-like 2                                                                            | -0.1171 | 0.0329 |
| 207763_at   | S100A5   | S100 calcium binding protein A5                                                                      | -0.1393 | 0.0125 |
| 207778_at   | REGL     | regenerating islet-derived-like; pancreatic stone protein-like; pancreatic thread protein-like (rat) | -0.1468 | 0.0339 |
| 207814_at   | DEFA6    | defensin; alpha 6; Paneth cell-specific                                                              | -0.1464 | 0.0026 |
| 207820_at   | ADH1A    | alcohol dehydrogenase 1A (class I); alpha polypeptide                                                | -0.2645 | 0.023  |
| 207834_at   | FBLN1    | fibulin 1                                                                                            | -0.1012 | 0.0013 |
| 207835_at   | FBLN1    | fibulin 1                                                                                            | -0.1514 | 0.0282 |
| 207837_at   | RBPMS    | RNA binding protein with multiple splicing                                                           | -0.2013 | 0.0424 |
| 207842_s_at | CASC3    | cancer susceptibility candidate 3                                                                    | -0.5214 | 0.0036 |
| 207843_x_at | CYB5A    | cytochrome b5 type A (microsomal)                                                                    | -2.3808 | 0      |

|             |         |                                                                                |         |        |
|-------------|---------|--------------------------------------------------------------------------------|---------|--------|
| 207844_at   | IL13    | interleukin 13                                                                 | -0.1941 | 0.0207 |
| 207857_at   | LILRA2  | leukocyte immunoglobulin-like receptor; subfamily A (with TM domain); member 2 | -0.8308 | 0      |
| 207859_s_at | CHRN3   | cholinergic receptor; nicotinic; beta 3                                        | -0.1139 | 0.0307 |
| 207864_at   | SCN7A   | sodium channel; voltage-gated; type VII; alpha                                 | -0.4099 | 0      |
| 207866_at   | BMP8A   | bone morphogenetic protein 8a                                                  | -0.147  | 0.0051 |
| 207868_at   | CHRNA2  | cholinergic receptor; nicotinic; alpha 2 (neuronal)                            | -0.1487 | 0.0275 |
| 207878_at   | KRT76   | keratin 76                                                                     | -0.1161 | 0.0313 |
| 207888_at   |         |                                                                                | -0.1111 | 0.0411 |
| 207897_at   | CRHR2   | corticotropin releasing hormone receptor 2                                     | -0.1563 | 0.0039 |
| 207900_at   | CCL17   | chemokine (C-C motif) ligand 17                                                | -0.1276 | 0.0428 |
| 207914_x_at | EVX1    | even-skipped homeobox 1                                                        | -0.4566 | 0.0025 |
| 207921_x_at | PAX8    | paired box 8                                                                   | -0.1846 | 0.0153 |
| 207923_x_at | PAX8    | paired box 8                                                                   | -0.1877 | 0.0231 |
| 207924_x_at | PAX8    | paired box 8                                                                   | -0.1444 | 0.0429 |
| 207933_at   | ZP2     | zona pellucida glycoprotein 2 (sperm receptor)                                 | -0.1169 | 0.0182 |
| 207935_s_at | KRT13   | keratin 13                                                                     | -0.1733 | 0.0022 |
| 207944_at   | LOC4951 | parvalbumin                                                                    | -0.1108 | 0.0304 |
| 207946_at   |         |                                                                                | -0.1226 | 0.0474 |
| 207954_at   | GATA2   | GATA binding protein 2                                                         | -0.1039 | 0.0282 |
| 207960_at   |         |                                                                                | -0.1307 | 0.0318 |
| 207961_x_at | MYH11   | myosin; heavy chain 11; smooth muscle                                          | -0.9661 | 0.0184 |
| 207962_at   | CAPN11  | calpain 11                                                                     | -0.1249 | 0.0184 |
| 207977_s_at | DPT     | dermatopontin                                                                  | -1.0134 | 0      |
| 207978_s_at | NR4A3   | nuclear receptor subfamily 4; group A; member 3                                | -3.1947 | 0      |
| 207992_s_at | AMPD3   | adenosine monophosphate deaminase (isoform E)                                  | -1.8517 | 0.012  |
| 207994_s_at | OPRM1   | opioid receptor; mu 1                                                          | -0.1348 | 0.029  |
| 207996_s_at | C18orf1 | chromosome 18 open reading frame 1                                             | -1.6103 | 0.0055 |
| 208007_at   |         |                                                                                | -0.1578 | 0.0297 |
| 208017_s_at | MCF2    | MCF.2 cell line derived transforming sequence                                  | -2.9426 | 0.0007 |
| 208018_s_at | HCK     | hemopoietic cell kinase                                                        | -1.8953 | 0.0002 |
| 208041_at   | GRK1    | G protein-coupled receptor kinase 1                                            | -0.1588 | 0.0171 |
| 208052_x_at | CEACAM3 | carcinoembryonic antigen-related cell adhesion molecule 3                      | -0.2148 | 0.0124 |
| 208060_at   | PAX7    | paired box 7                                                                   | -0.1765 | 0.0022 |
| 208063_s_at | CAPN9   | calpain 9                                                                      | -0.1913 | 0.0111 |
| 208066_s_at | GTF2B   | general transcription factor IIB                                               | -0.8497 | 0.0011 |

|             |          |                                                                                                                                                                                   |         |        |
|-------------|----------|-----------------------------------------------------------------------------------------------------------------------------------------------------------------------------------|---------|--------|
| 208069_x_at | CSH1     | chorionic somatomammotropin hormone 1 (placental lactogen), chorionic somatomammotropin hormone 2, chorionic somatomammotropin hormone-like 1, growth hormone 1, growth hormone 2 | -0.1433 | 0.0021 |
| 208078_s_at | SNF1LK   | SNF1-like kinase                                                                                                                                                                  | -2.0479 | 0.0006 |
| 208084_at   | ITGB6    | integrin; beta 6                                                                                                                                                                  | -0.155  | 0.0017 |
| 208085_s_at | ARHGAP6  | Rho GTPase activating protein 6                                                                                                                                                   | -0.1853 | 0.0021 |
| 208090_s_at | AIRE     | autoimmune regulator                                                                                                                                                              | -0.1569 | 0.0325 |
| 208092_s_at | FAM49A   | family with sequence similarity 49; member A                                                                                                                                      | -0.9454 | 0.01   |
| 208093_s_at | NDEL1    | nudE nuclear distribution gene E homolog (A. nidulans)-like 1                                                                                                                     | -1.4724 | 0      |
| 208116_s_at | MAN1A1   | mannosidase; alpha; class 1A; member 1                                                                                                                                            | -1.9702 | 0.003  |
| 208123_at   | KCNB2    | potassium voltage-gated channel; Shab-related subfamily; member 2                                                                                                                 | -0.126  | 0.041  |
| 208128_x_at | KIF25    | kinesin family member 25                                                                                                                                                          | -0.1197 | 0.0027 |
| 208130_s_at | TBXAS1   | thromboxane A synthase 1 (platelet; cytochrome P450; family 5; subfamily A)                                                                                                       | -0.9699 | 0      |
| 208131_s_at | PTGIS    | prostaglandin I2 (prostacyclin) synthase                                                                                                                                          | -1.5382 | 0.0048 |
| 208133_at   | RFC1     | replication factor C (activator 1) 1; 145kDa                                                                                                                                      | -0.1388 | 0.0092 |
| 208136_s_at | MGC3771  | hypothetical protein MGC3771                                                                                                                                                      | -0.1029 | 0.0465 |
| 208138_at   | GAST     | gastrin                                                                                                                                                                           | -0.1743 | 0.0016 |
| 208158_s_at | OSBPL1A  | oxysterol binding protein-like 1A                                                                                                                                                 | -0.6045 | 0.0263 |
| 208160_at   | FLJ10232 | hypothetical protein FLJ10232                                                                                                                                                     | -0.1298 | 0.0079 |
| 208161_s_at | ABCC3    | ATP-binding cassette; sub-family C (CFTR/MRP); member 3                                                                                                                           | -2.6836 | 0.0005 |
| 208169_s_at | PTGER3   | prostaglandin E receptor 3 (subtype EP3)                                                                                                                                          | -0.1609 | 0.0047 |
| 208173_at   | IFNB1    | interferon; beta 1; fibroblast                                                                                                                                                    | -0.1716 | 0.013  |
| 208183_at   | TACR3    | tachykinin receptor 3                                                                                                                                                             | -0.1436 | 0.0244 |
| 208188_at   | KRT9     | keratin 9 (epidermolytic palmoplantar keratoderma)                                                                                                                                | -0.102  | 0.0458 |
| 208189_s_at | MYO7A    | myosin VIIA                                                                                                                                                                       | -2.3613 | 0      |
| 208201_at   | DUX3     | double homeobox; 3, double homeobox; 4, similar to double homeobox 4c, similar to double homeobox; 4                                                                              | -0.2121 | 0.0001 |
| 208204_s_at | CAV3     | caveolin 3                                                                                                                                                                        | -0.1405 | 0.0164 |
| 208206_s_at | RASGRP2  | RAS guanyl releasing protein 2 (calcium and DAG-regulated)                                                                                                                        | -0.791  | 0      |
| 208210_at   | MAS1     | MAS1 oncogene                                                                                                                                                                     | -0.1253 | 0.0369 |
| 208215_x_at | DRD4     | dopamine receptor D4                                                                                                                                                              | -0.1081 | 0.0458 |
| 208217_at   | GABRR2   | gamma-aminobutyric acid (GABA) receptor; rho 2                                                                                                                                    | -0.187  | 0.032  |

|             |              |                                                                                                                                                                                                                                                                                                                                                       |         |        |
|-------------|--------------|-------------------------------------------------------------------------------------------------------------------------------------------------------------------------------------------------------------------------------------------------------------------------------------------------------------------------------------------------------|---------|--------|
| 208228_s_at | FGFR2        | fibroblast growth factor receptor 2 (bacteria-expressed kinase; keratinocyte growth factor receptor; craniofacial dysostosis 1; Crouzon syndrome; Pfeiffer syndrome; Jackson-Weiss syndrome)                                                                                                                                                          | -2.1561 | 0.0041 |
| 208234_x_at | FGFR2        | fibroblast growth factor receptor 2 (bacteria-expressed kinase; keratinocyte growth factor receptor; craniofacial dysostosis 1; Crouzon syndrome; Pfeiffer syndrome; Jackson-Weiss syndrome)                                                                                                                                                          | -0.2345 | 0.0102 |
| 208242_at   | RAX          | retina and anterior neural fold homeobox                                                                                                                                                                                                                                                                                                              | -0.1737 | 0.0275 |
| 208250_s_at | DMBT1        | deleted in malignant brain tumors 1                                                                                                                                                                                                                                                                                                                   | -0.1894 | 0.003  |
| 208251_at   | KCNC4        | potassium voltage-gated channel; Shaw-related subfamily; member 4                                                                                                                                                                                                                                                                                     | -0.2065 | 0.0004 |
| 208253_at   | SIGLEC8      | sialic acid binding Ig-like lectin 8                                                                                                                                                                                                                                                                                                                  | -0.5409 | 0      |
| 208254_at   | C15orf31     | chromosome 15 open reading frame 31                                                                                                                                                                                                                                                                                                                   | -0.1254 | 0.0033 |
| 208259_x_at | IFNA7        | interferon; alpha 7                                                                                                                                                                                                                                                                                                                                   | -0.1019 | 0.033  |
| 208265_at   | DKFZp547H025 | hypothetical protein DKFZp547H025                                                                                                                                                                                                                                                                                                                     | -0.1822 | 0.0072 |
| 208266_at   | C8orf17      | chromosome 8 open reading frame 17                                                                                                                                                                                                                                                                                                                    | -0.1355 | 0.0075 |
| 208284_x_at | GGT1         | gamma-glutamyltransferase 1                                                                                                                                                                                                                                                                                                                           | -0.2048 | 0.013  |
| 208288_at   | ABCB11       | ATP-binding cassette; sub-family B (MDR/TAP); member 11                                                                                                                                                                                                                                                                                               | -0.117  | 0.0473 |
| 208291_s_at | TH           | tyrosine hydroxylase                                                                                                                                                                                                                                                                                                                                  | -1.7825 | 0      |
| 208297_s_at | EVI5         | ecotropic viral integration site 5                                                                                                                                                                                                                                                                                                                    | -0.2873 | 0.005  |
| 208299_at   | CACNA1I      | calcium channel; voltage-dependent; T type; alpha 1I subunit                                                                                                                                                                                                                                                                                          | -0.136  | 0.0263 |
| 208306_x_at | HLA-DRB1     | Major histocompatibility complex; class II; DR beta 1                                                                                                                                                                                                                                                                                                 | -1.6792 | 0.0058 |
| 208307_at   | RBM1A1       | RNA binding motif protein; Y-linked; family 1; member A1, RNA binding motif protein; Y-linked; family 1; member B, RNA binding motif protein; Y-linked; family 1; member D, RNA binding motif protein; Y-linked; family 1; member E, RNA binding motif protein; Y-linked; family 1; member F, RNA binding motif protein; Y-linked; family 1; member J | -0.1165 | 0.0254 |
| 208313_s_at | SF1          | splicing factor 1                                                                                                                                                                                                                                                                                                                                     | -0.6899 | 0.0006 |
| 208329_at   | PBOV1        | prostate and breast cancer overexpressed 1                                                                                                                                                                                                                                                                                                            | -0.2091 | 0.0112 |
| 208338_at   | P2RX3        | purinergic receptor P2X; ligand-gated ion channel; 3                                                                                                                                                                                                                                                                                                  | -0.1143 | 0.0347 |
| 208344_x_at | IFNA1        | interferon; alpha 1, interferon; alpha 13                                                                                                                                                                                                                                                                                                             | -0.1702 | 0.0447 |
| 208373_s_at | P2RY6        | pyrimidinergic receptor P2Y; G-protein coupled; 6                                                                                                                                                                                                                                                                                                     | -0.2677 | 0.0072 |
| 208380_at   | LBX1         | ladybird homeobox 1                                                                                                                                                                                                                                                                                                                                   | -0.1539 | 0.0011 |
| 208387_s_at | MMP24        | matrix metalloproteinase 24 (membrane-inserted)                                                                                                                                                                                                                                                                                                       | -0.1122 | 0.0406 |



|             |          |                                                                                                          |         |        |
|-------------|----------|----------------------------------------------------------------------------------------------------------|---------|--------|
| 208389_s_at | SLC1A2   | solute carrier family 1 (glial high affinity glutamate transporter); member 2                            | -1.0422 | 0      |
| 208397_x_at | KCNJ5    | potassium inwardly-rectifying channel; subfamily J; member 5                                             | -0.3294 | 0.0007 |
| 208399_s_at | EDN3     | endothelin 3                                                                                             | -0.7649 | 0.0246 |
| 208404_x_at | KCNJ5    | potassium inwardly-rectifying channel; subfamily J; member 5                                             | -1.2414 | 0      |
| 208407_s_at | CTNND1   | catenin (cadherin-associated protein); delta 1                                                           | -0.8276 | 0.0162 |
| 208410_x_at | AMELX    | amelogenin (amelogenesis imperfecta 1; X-linked)                                                         | -0.102  | 0.016  |
| 208417_at   | FGF6     | fibroblast growth factor 6                                                                               | -0.2912 | 0.0131 |
| 208420_x_at | SUPT6H   | suppressor of Ty 6 homolog (S. cerevisiae)                                                               | -0.7399 | 0.0003 |
| 208437_at   | CLCN1    | chloride channel 1; skeletal muscle (Thomsen disease; autosomal dominant)                                | -0.1533 | 0.0473 |
| 208438_s_at | FGR      | Gardner-Rasheed feline sarcoma viral (v-fgr) oncogene homolog                                            | -1.0445 | 0.0164 |
| 208449_s_at | FGF8     | fibroblast growth factor 8 (androgen-induced)                                                            | -0.1431 | 0.0101 |
| 208461_at   | HIC1     | hypermethylated in cancer 1                                                                              | -0.1242 | 0.0384 |
| 208462_s_at | ABCC9    | ATP-binding cassette; sub-family C (CFTR/MRP); member 9                                                  | -0.1466 | 0.0057 |
| 208465_at   | GRM2     | glutamate receptor; metabotropic 2                                                                       | -0.1247 | 0.0247 |
| 208468_at   | SOX21    | SRY (sex determining region Y)-box 21                                                                    | -0.1881 | 0.0039 |
| 208483_x_at | KRT33A   | keratin 33A                                                                                              | -0.1305 | 0.0175 |
| 208487_at   | LMX1B    | LIM homeobox transcription factor 1; beta                                                                | -0.1075 | 0.0471 |
| 208489_at   | GJA8     | gap junction protein; alpha 8; 50kDa                                                                     | -0.25   | 0.0085 |
| 208495_at   | TLX3     | T-cell leukemia homeobox 3                                                                               | -0.2129 | 0.0005 |
| 208507_at   | OR7C2    | olfactory receptor; family 7; subfamily C; member 2                                                      | -0.1243 | 0.0101 |
| 208513_at   | FOXB1    | forkhead box B1                                                                                          | -0.1651 | 0.0175 |
| 208514_at   | KCNE1    | potassium voltage-gated channel; Isk-related family; member 1                                            | -0.1358 | 0.0202 |
| 208526_at   | OR2F1    | olfactory receptor; family 2; subfamily F; member 1, olfactory receptor; family 2; subfamily F; member 2 | -0.1986 | 0.0033 |
| 208533_at   | SOX1     | SRY (sex determining region Y)-box 1                                                                     | -0.126  | 0.0273 |
| 208534_s_at | FLJ21767 | RAS p21 protein activator 4, hypothetical protein FLJ21767                                               | -0.7024 | 0.0189 |
| 208538_at   | ANP32C   | acidic (leucine-rich) nuclear phosphoprotein 32 family; member C                                         | -0.144  | 0.0213 |
| 208556_at   | GPR31    | G protein-coupled receptor 31                                                                            | -0.1582 | 0.0112 |
| 208557_at   | HOXA6    | homeobox A6                                                                                              | -0.302  | 0.0131 |
| 208559_at   | PDX1     | pancreatic and duodenal homeobox 1                                                                       | -0.1945 | 0.0133 |
| 208560_at   | KCNA10   | potassium voltage-gated channel; shaker-related subfamily; member 10                                     | -0.1558 | 0.023  |
| 208561_at   | ABCC9    | ATP-binding cassette; sub-family C (CFTR/MRP); member 9                                                  | -0.3189 | 0.0196 |

|             |         |                                                                                                                                                                                                                            |         |        |
|-------------|---------|----------------------------------------------------------------------------------------------------------------------------------------------------------------------------------------------------------------------------|---------|--------|
| 208564_at   | KCNA2   | potassium voltage-gated channel; shaker-related subfamily; member 2                                                                                                                                                        | -0.1991 | 0.0078 |
| 208566_at   | KCNJ12  | potassium inwardly-rectifying channel; subfamily J; member 12                                                                                                                                                              | -0.1523 | 0.0038 |
| 208568_at   | MC2R    | melanocortin 2 receptor (adrenocorticotrophic hormone)                                                                                                                                                                     | -2.1446 | 0.0115 |
| 208571_at   | ANP32A  | acidic (leucine-rich) nuclear phosphoprotein 32 family; member A, acidic (leucine-rich) nuclear phosphoprotein 32 family; member C, acidic (leucine-rich) nuclear phosphoprotein 32 family; member D, hepatopoietin PCn127 | -0.1525 | 0.0304 |
| 208572_at   | HIST3H3 | histone cluster 3; H3                                                                                                                                                                                                      | -0.1009 | 0.0115 |
| 208578_at   | SCN10A  | sodium channel; voltage-gated; type X; alpha subunit                                                                                                                                                                       | -0.1688 | 0.0302 |
| 208581_x_at | MT1X    | metallothionein 1X                                                                                                                                                                                                         | -0.876  | 0.0016 |
| 208584_at   | SNCG    | synuclein; gamma (breast cancer-specific protein 1)                                                                                                                                                                        | -0.1698 | 0.0098 |
| 208585_at   | BTN2A3  | butyrophilin; subfamily 2; member A3                                                                                                                                                                                       | -0.1452 | 0.017  |
| 208588_at   | FKSG2   | apoptosis inhibitor                                                                                                                                                                                                        | -0.2162 | 0.0016 |
| 208604_s_at | HOXA3   | homeobox A3                                                                                                                                                                                                                | -0.1411 | 0.0147 |
| 208607_s_at | SAA1    | serum amyloid A1, serum amyloid A2                                                                                                                                                                                         | -0.4519 | 0.0031 |
| 208613_s_at | FLNB    | filamin B; beta (actin binding protein 278)                                                                                                                                                                                | -1.2014 | 0.0014 |
| 208614_s_at | FLNB    | filamin B; beta (actin binding protein 278)                                                                                                                                                                                | -1.2978 | 0.0008 |
| 208615_s_at | PTP4A2  | protein tyrosine phosphatase type IVA; member 2                                                                                                                                                                            | -0.5239 | 0.0152 |
| 208617_s_at | PTP4A2  | protein tyrosine phosphatase type IVA; member 2                                                                                                                                                                            | -0.556  | 0.0008 |
| 208619_at   | DDB1    | damage-specific DNA binding protein 1; 127kDa                                                                                                                                                                              | -0.4207 | 0.0021 |
| 208620_at   | PCBP1   | poly(rC) binding protein 1                                                                                                                                                                                                 | -0.4375 | 0.0044 |
| 208622_s_at | VIL2    | villin 2 (ezrin)                                                                                                                                                                                                           | -1.0545 | 0.0149 |
| 208623_s_at | VIL2    | villin 2 (ezrin)                                                                                                                                                                                                           | -0.8514 | 0      |
| 208626_s_at | VAT1    | vesicle amine transport protein 1 homolog (T. californica)                                                                                                                                                                 | -0.8294 | 0.0072 |
| 208630_at   | HADHA   | hydroxyacyl-Coenzyme A dehydrogenase/3-ketoacyl-Coenzyme A thiolase/enoyl-Coenzyme A hydratase (trifunctional protein); alpha subunit                                                                                      | -0.5399 | 0      |
| 208631_s_at | HADHA   | hydroxyacyl-Coenzyme A dehydrogenase/3-ketoacyl-Coenzyme A thiolase/enoyl-Coenzyme A hydratase (trifunctional protein); alpha subunit                                                                                      | -0.6708 | 0.0024 |
| 208634_s_at | MACF1   | microtubule-actin crosslinking factor 1                                                                                                                                                                                    | -0.504  | 0.0023 |
| 208643_s_at | XRCC5   | X-ray repair complementing defective repair in Chinese hamster cells 5 (double-strand-break rejoining; Ku autoantigen; 80kDa)                                                                                              | -0.3997 | 0.008  |
| 208666_s_at | ST13    | suppression of tumorigenicity 13 (colon carcinoma) (Hsp70 interacting protein)                                                                                                                                             | -0.8133 | 0.0037 |

|             |           |                                                                                                |         |        |
|-------------|-----------|------------------------------------------------------------------------------------------------|---------|--------|
| 208667_s_at | ST13      | suppression of tumorigenicity 13 (colon carcinoma) (Hsp70 interacting protein)                 | -0.3938 | 0.0286 |
| 208669_s_at | EID1      | EP300 interacting inhibitor of differentiation 1                                               | -0.2976 | 0.0479 |
| 208672_s_at | SFRS3     | splicing factor; arginine/serine-rich 3                                                        | -0.3811 | 0.0005 |
| 208673_s_at | SFRS3     | splicing factor; arginine/serine-rich 3                                                        | -0.3947 | 0.0161 |
| 208683_at   | CAPN2     | calpain 2; (m/II) large subunit                                                                | -0.3108 | 0.0206 |
| 208690_s_at | PDLIM1    | PDZ and LIM domain 1 (elfin)                                                                   | -0.9613 | 0.041  |
| 208706_s_at | EIF5      | eukaryotic translation initiation factor 5                                                     | -0.5488 | 0.0111 |
| 208728_s_at | CDC42     | cell division cycle 42 (GTP binding protein; 25kDa)                                            | -0.1987 | 0.0421 |
| 208730_x_at | RAB2A     | RAB2A; member RAS oncogene family                                                              | -0.2903 | 0.0321 |
| 208745_at   | ATP5L     | ATP synthase; H+ transporting; mitochondrial F0 complex; subunit G                             | -0.7718 | 0.0001 |
| 208746_x_at | ATP5L     | ATP synthase; H+ transporting; mitochondrial F0 complex; subunit G                             | -0.5141 | 0.0008 |
| 208747_s_at | C1S       | complement component 1; s subcomponent                                                         | -1.9138 | 0.002  |
| 208749_x_at | FLOT1     | flotillin 1                                                                                    | -0.784  | 0      |
| 208768_x_at | RPL22     | ribosomal protein L22                                                                          | -0.2716 | 0.0057 |
| 208771_s_at | LTA4H     | leukotriene A4 hydrolase                                                                       | -0.474  | 0.0002 |
| 208780_x_at | VAPA      | VAMP (vesicle-associated membrane protein)-associated protein A; 33kDa                         | -0.2656 | 0.0064 |
| 208782_at   | FSTL1     | folliculin-like 1                                                                              | -0.6834 | 0.0436 |
| 208788_at   | ELOVL5    | ELOVL family member 5; elongation of long chain fatty acids (FEN1/Elo2; SUR4/Elo3-like; yeast) | -0.4161 | 0.0275 |
| 208804_s_at | SFRS6     | splicing factor; arginine/serine-rich 6                                                        | -0.6537 | 0.0001 |
| 208806_at   | CHD3      | chromodomain helicase DNA binding protein 3                                                    | -0.5218 | 0.0302 |
| 208813_at   | GOT1      | glutamic-oxaloacetic transaminase 1; soluble (aspartate aminotransferase 1)                    | -1.3924 | 0.0002 |
| 208825_x_at | RPL23A    | ribosomal protein L23a                                                                         | -0.1488 | 0.0008 |
| 208827_at   | PSMB6     | proteasome (prosome; macropain) subunit; beta type; 6                                          | -0.4594 | 0.002  |
| 208830_s_at | SUPT6H    | suppressor of Ty 6 homolog (S. cerevisiae)                                                     | -0.614  | 0.0044 |
| 208831_x_at | SUPT6H    | suppressor of Ty 6 homolog (S. cerevisiae)                                                     | -0.6891 | 0.0011 |
| 208832_at   | ATXN10    | ataxin 10                                                                                      | -1.2123 | 0      |
| 208833_s_at | ATXN10    | ataxin 10                                                                                      | -0.7115 | 0.0001 |
| 208834_x_at | hCG_16001 | ribosomal protein L23a, similar to ribosomal protein L23A                                      | -0.1292 | 0.0014 |
| 208836_at   | ATP1B3    | ATPase; Na+/K+ transporting; beta 3 polypeptide                                                | -1.7356 | 0      |
| 208863_s_at | SFRS1     | splicing factor; arginine/serine-rich 1 (splicing factor 2; alternate splicing factor)         | -0.3606 | 0.0206 |

|             |         |                                                                                  |         |        |
|-------------|---------|----------------------------------------------------------------------------------|---------|--------|
| 208870_x_at | ATP5C1  | ATP synthase; H+ transporting; mitochondrial F1 complex; gamma polypeptide 1     | -0.217  | 0.0408 |
| 208877_at   | PAK2    | p21 (CDKN1A)-activated kinase 2                                                  | -0.5394 | 0.0146 |
| 208894_at   | HLA-DRA | major histocompatibility complex; class II; DR alpha                             | -1.998  | 0.0051 |
| 208896_at   | DDX18   | DEAD (Asp-Glu-Ala-Asp) box polypeptide 18                                        | -0.3849 | 0.0257 |
| 208898_at   | ATP6V1D | ATPase; H+ transporting; lysosomal 34kDa; V1 subunit D                           | -0.6266 | 0.0003 |
| 208899_x_at | ATP6V1D | ATPase; H+ transporting; lysosomal 34kDa; V1 subunit D                           | -0.5356 | 0.022  |
| 208903_at   | RPS28   | ribosomal protein S28                                                            | -0.633  | 0.024  |
| 208910_s_at | C1QBP   | complement component 1; q subcomponent binding protein                           | -0.4642 | 0.0142 |
| 208911_s_at | PDHB    | pyruvate dehydrogenase (lipoamide) beta                                          | -0.4463 | 0.0218 |
| 208912_s_at | CNP     | 2',3'-cyclic nucleotide 3' phosphodiesterase                                     | -0.6009 | 0.0275 |
| 208916_at   | SLC1A5  | solute carrier family 1 (neutral amino acid transporter); member 5               | -0.8528 | 0.0001 |
| 208919_s_at | NADK    | NAD kinase                                                                       | -0.5977 | 0.0074 |
| 208920_at   | SRI     | sorcini                                                                          | -0.8504 | 0.0326 |
| 208922_s_at | NXF1    | nuclear RNA export factor 1                                                      | -0.7625 | 0.0001 |
| 208923_at   | CYFIP1  | cytoplasmic FMR1 interacting protein 1                                           | -0.38   | 0.0332 |
| 208924_at   | RNF11   | ring finger protein 11                                                           | -0.505  | 0.0027 |
| 208937_s_at | ID1     | inhibitor of DNA binding 1; dominant negative helix-loop-helix protein           | -2.1292 | 0.0012 |
| 208943_s_at | TLOC1   | translocation protein 1                                                          | -0.2707 | 0.0069 |
| 208944_at   | TGFBR2  | transforming growth factor; beta receptor II (70/80kDa)                          | -1.6087 | 0.0002 |
| 208945_s_at | BECN1   | beclin 1 (coiled-coil; myosin-like BCL2 interacting protein)                     | -0.4456 | 0.0453 |
| 208946_s_at | BECN1   | beclin 1 (coiled-coil; myosin-like BCL2 interacting protein)                     | -0.518  | 0.0021 |
| 208950_s_at | ALDH7A1 | aldehyde dehydrogenase 7 family; member A1                                       | -0.6516 | 0.004  |
| 208951_at   | ALDH7A1 | aldehyde dehydrogenase 7 family; member A1                                       | -0.6831 | 0.0062 |
| 208962_s_at | FADS1   | fatty acid desaturase 1                                                          | -1.3193 | 0.0142 |
| 208963_x_at | FADS1   | fatty acid desaturase 1                                                          | -1.2876 | 0.0158 |
| 208964_s_at | FADS1   | fatty acid desaturase 1                                                          | -1.428  | 0.0057 |
| 208970_s_at | UROD    | uroporphyrinogen decarboxylase                                                   | -0.4723 | 0.0088 |
| 208984_x_at | RBM10   | RNA binding motif protein 10                                                     | -0.4602 | 0.0189 |
| 208991_at   | STAT3   | signal transducer and activator of transcription 3 (acute-phase response factor) | -0.493  | 0.0112 |
| 208997_s_at | UCP2    | uncoupling protein 2 (mitochondrial; proton carrier)                             | -1.3841 | 0.0264 |
| 208998_at   | UCP2    | uncoupling protein 2 (mitochondrial; proton carrier)                             | -1.9593 | 0.0038 |
| 209005_at   | FBXL5   | F-box and leucine-rich repeat protein 5                                          | -0.7696 | 0.0121 |
| 209008_x_at | KRT8    | keratin 8                                                                        | -1.246  | 0.0217 |
| 209018_s_at | PINK1   | PTEN induced putative kinase 1                                                   | -0.9136 | 0.0196 |

|             |          |                                                                              |         |        |
|-------------|----------|------------------------------------------------------------------------------|---------|--------|
| 209019_s_at | PINK1    | PTEN induced putative kinase 1                                               | -0.7671 | 0.0013 |
| 209021_x_at | KIAA0652 | KIAA0652                                                                     | -0.4466 | 0.0001 |
| 209034_at   | PNRC1    | proline-rich nuclear receptor coactivator 1                                  | -0.3473 | 0.0174 |
| 209072_at   | MBP      | myelin basic protein                                                         | -0.2403 | 0.0087 |
| 209075_s_at | ISCU     | iron-sulfur cluster scaffold homolog (E. coli)                               | -0.3914 | 0.0286 |
| 209076_s_at | WDR45L   | WDR45-like                                                                   | -0.8924 | 0      |
| 209077_at   | TXN2     | thioredoxin 2                                                                | -0.7542 | 0.0008 |
| 209078_s_at | TXN2     | thioredoxin 2                                                                | -0.8118 | 0.0129 |
| 209083_at   | CORO1A   | coronin; actin binding protein; 1A                                           | -1.435  | 0.001  |
| 209086_x_at | MCAM     | melanoma cell adhesion molecule                                              | -0.7229 | 0.0179 |
| 209087_x_at | MCAM     | melanoma cell adhesion molecule                                              | -1.1353 | 0.004  |
| 209094_at   | DDAH1    | dimethylarginine dimethylaminohydrolase 1                                    | -1.7911 | 0.002  |
| 209101_at   | CTGF     | connective tissue growth factor                                              | -3.0808 | 0.0005 |
| 209102_s_at | HBP1     | HMG-box transcription factor 1                                               | -0.4781 | 0.0006 |
| 209105_at   | NCOA1    | nuclear receptor coactivator 1                                               | -0.6239 | 0.0421 |
| 209106_at   | NCOA1    | nuclear receptor coactivator 1                                               | -0.6537 | 0.0036 |
| 209109_s_at | TSPAN6   | tetraspanin 6                                                                | -0.7182 | 0.0318 |
| 209111_at   | RNF5     | ring finger protein 5                                                        | -0.366  | 0.0399 |
| 209116_x_at | HBB      | hemoglobin; beta                                                             | -1.781  | 0.0208 |
| 209120_at   | NR2F2    | nuclear receptor subfamily 2; group F; member 2                              | -0.819  | 0.0002 |
| 209121_x_at | NR2F2    | nuclear receptor subfamily 2; group F; member 2                              | -0.6865 | 0.0455 |
| 209122_at   | ADFP     | adipose differentiation-related protein                                      | -1.5798 | 0.0028 |
| 209129_at   | TRIP6    | thyroid hormone receptor interactor 6                                        | -1.52   | 0.0072 |
| 209134_s_at | RPS6     | ribosomal protein S6                                                         | -0.1841 | 0.0205 |
| 209139_s_at | PRKRA    | protein kinase; interferon-inducible double stranded RNA dependent activator | -0.3523 | 0.0335 |
| 209143_s_at | CLNS1A   | chloride channel; nucleotide-sensitive; 1A                                   | -0.4112 | 0.0033 |
| 209147_s_at | PPAP2A   | phosphatidic acid phosphatase type 2A                                        | -0.6507 | 0.0176 |
| 209159_s_at | NDRG4    | NDRG family member 4                                                         | -3.0758 | 0.0042 |
| 209163_at   | CYB561   | cytochrome b-561                                                             | -1.3001 | 0.0104 |
| 209167_at   | GPM6B    | glycoprotein M6B                                                             | -3.2524 | 0      |
| 209168_at   | GPM6B    | glycoprotein M6B                                                             | -0.6722 | 0      |
| 209169_at   | GPM6B    | glycoprotein M6B                                                             | -0.6948 | 0      |
| 209170_s_at | GPM6B    | glycoprotein M6B                                                             | -3.061  | 0      |
| 209174_s_at | QRICH1   | glutamine-rich 1                                                             | -0.4914 | 0.0026 |
| 209177_at   | C3orf60  | chromosome 3 open reading frame 60                                           | -0.9618 | 0.0004 |
| 209182_s_at | C10orf10 | chromosome 10 open reading frame 10                                          | -0.6203 | 0.0075 |

|             |          |                                                                             |         |        |
|-------------|----------|-----------------------------------------------------------------------------|---------|--------|
| 209183_s_at | C10orf10 | chromosome 10 open reading frame 10                                         | -2.1175 | 0.0001 |
| 209186_at   | ATP2A2   | ATPase; Ca <sup>++</sup> transporting; cardiac muscle; slow twitch 2        | -0.4239 | 0.009  |
| 209189_at   | FOS      | v-fos FBJ murine osteosarcoma viral oncogene homolog                        | -2.7161 | 0.0003 |
| 209192_x_at | HTATIP   | HIV-1 Tat interacting protein; 60kDa                                        | -0.3448 | 0.0084 |
| 209199_s_at | MEF2C    | myocyte enhancer factor 2C                                                  | -0.8005 | 0.0121 |
| 209200_at   | MEF2C    | myocyte enhancer factor 2C                                                  | -1.0754 | 0.0089 |
| 209208_at   | MPDU1    | mannose-P-dolichol utilization defect 1                                     | -0.7125 | 0.0031 |
| 209210_s_at | PLEKHC1  | pleckstrin homology domain containing; family C (with FERM domain) member 1 | -0.7928 | 0.042  |
| 209211_at   | KLF5     | Kruppel-like factor 5 (intestinal)                                          | -0.997  | 0.0005 |
| 209212_s_at | KLF5     | Kruppel-like factor 5 (intestinal)                                          | -0.6745 | 0.0026 |
| 209214_s_at | EWSR1    | Ewing sarcoma breakpoint region 1                                           | -0.452  | 0.0071 |
| 209216_at   | WDR45    | WD repeat domain 45                                                         | -0.7072 | 0.0053 |
| 209217_s_at | WDR45    | WD repeat domain 45                                                         | -0.6243 | 0.0159 |
| 209219_at   | RDBP     | RD RNA binding protein                                                      | -0.5702 | 0.0142 |
| 209220_at   | GPC3     | glypican 3                                                                  | -2.2201 | 0      |
| 209230_s_at | NUPR1    | nuclear protein 1                                                           | -1.7185 | 0.0386 |
| 209234_at   | KIF1B    | kinesin family member 1B                                                    | -1.024  | 0.0057 |
| 209236_at   | SLC23A2  | solute carrier family 23 (nucleobase transporters); member 2                | -1.527  | 0.0006 |
| 209239_at   | NFKB1    | nuclear factor of kappa light polypeptide gene enhancer in B-cells 1 (p105) | -0.9345 | 0.0024 |
| 209244_s_at | KIF1C    | kinesin family member 1C                                                    | -0.3886 | 0.0013 |
| 209253_at   | SORBS3   | sorbin and SH3 domain containing 3                                          | -0.585  | 0.0256 |
| 209263_x_at | TSPAN4   | tetraspanin 4                                                               | -1.4634 | 0.0009 |
| 209264_s_at | TSPAN4   | tetraspanin 4                                                               | -1.0332 | 0.046  |
| 209268_at   | VPS45    | vacuolar protein sorting 45 homolog (S. cerevisiae)                         | -0.8698 | 0.0002 |
| 209269_s_at | SYK      | spleen tyrosine kinase                                                      | -0.2289 | 0.007  |
| 209272_at   | NAB1     | NGFI-A binding protein 1 (EGR1 binding protein 1)                           | -0.5451 | 0.0063 |
| 209273_s_at | ISCA1    | iron-sulfur cluster assembly 1 homolog (S. cerevisiae)                      | -0.5333 | 0.0062 |
| 209274_s_at | ISCA1    | iron-sulfur cluster assembly 1 homolog (S. cerevisiae)                      | -0.6195 | 0.0009 |
| 209276_s_at | GLRX     | glutaredoxin (thioltransferase)                                             | -1.5399 | 0.0001 |
| 209283_at   | CRYAB    | crystallin; alpha B                                                         | -1.8925 | 0.0049 |
| 209286_at   | CDC42EP3 | CDC42 effector protein (Rho GTPase binding) 3                               | -1.0416 | 0.0253 |
| 209287_s_at | CDC42EP3 | CDC42 effector protein (Rho GTPase binding) 3                               | -0.2481 | 0.0261 |
| 209288_s_at | CDC42EP3 | CDC42 effector protein (Rho GTPase binding) 3                               | -1.1199 | 0.0253 |
| 209290_s_at | NFIB     | nuclear factor I/B                                                          | -0.3845 | 0.0231 |
| 209298_s_at | ITSN1    | intersectin 1 (SH3 domain protein)                                          | -0.779  | 0.0117 |

|             |          |                                                                                                            |         |        |
|-------------|----------|------------------------------------------------------------------------------------------------------------|---------|--------|
| 209304_x_at | GADD45B  | growth arrest and DNA-damage-inducible; beta                                                               | -0.8857 | 0.0343 |
| 209312_x_at | HLA-DRB1 | hypothetical protein LOC730415, major histocompatibility complex; class II; DR beta 1                      | -2.0029 | 0.0045 |
| 209323_at   | PRKRIR   | protein-kinase; interferon-inducible double stranded RNA dependent inhibitor; repressor of (P58 repressor) | -0.6827 | 0.002  |
| 209335_at   | DCN      | decorin                                                                                                    | -4.2802 | 0      |
| 209339_at   | SIAH2    | seven in absentia homolog 2 (Drosophila)                                                                   | -0.7737 | 0.0098 |
| 209340_at   | UAP1     | UDP-N-acetylglucosamine pyrophosphorylase 1                                                                | -1.207  | 0      |
| 209348_s_at | MAF      | v-maf musculoaponeurotic fibrosarcoma oncogene homolog (avian)                                             | -1.3557 | 0.0069 |
| 209351_at   | KRT14    | keratin 14 (epidermolysis bullosa simplex; Dowling-Meara; Koebner)                                         | -0.1977 | 0.0017 |
| 209353_s_at |          |                                                                                                            | -0.1719 | 0.0062 |
| 209354_at   | TNFRSF14 | tumor necrosis factor receptor superfamily; member 14 (herpesvirus entry mediator)                         | -0.8799 | 0.0051 |
| 209355_s_at | PPAP2B   | phosphatidic acid phosphatase type 2B                                                                      | -1.7774 | 0.0009 |
| 209356_x_at | EFEMP2   | EGF-containing fibulin-like extracellular matrix protein 2                                                 | -1.7338 | 0.0003 |
| 209364_at   | BAD      | BCL2-antagonist of cell death                                                                              | -0.4638 | 0.0319 |
| 209365_s_at | ECM1     | extracellular matrix protein 1                                                                             | -1.2951 | 0.0079 |
| 209366_x_at | CYB5A    | cytochrome b5 type A (microsomal)                                                                          | -2.4596 | 0      |
| 209368_at   | EPHX2    | epoxide hydrolase 2; cytoplasmic                                                                           | -2.6223 | 0      |
| 209370_s_at | SH3BP2   | SH3-domain binding protein 2                                                                               | -0.3297 | 0.0034 |
| 209386_at   | TM4SF1   | transmembrane 4 L six family member 1                                                                      | -1.9466 | 0.0002 |
| 209387_s_at | TM4SF1   | transmembrane 4 L six family member 1                                                                      | -2.4501 | 0.0001 |
| 209397_at   | ME2      | malic enzyme 2; NAD(+)-dependent; mitochondrial                                                            | -0.5727 | 0.0271 |
| 209407_s_at | DEAF1    | deformed epidermal autoregulatory factor 1 (Drosophila)                                                    | -1.0988 | 0.0042 |
| 209414_at   | FZR1     | fizzy/cell division cycle 20 related 1 (Drosophila)                                                        | -0.5129 | 0.0224 |
| 209417_s_at | IFI35    | interferon-induced protein 35                                                                              | -2.2009 | 0      |
| 209427_at   | SMTN     | smoothelin                                                                                                 | -1.3439 | 0      |
| 209429_x_at | EIF2B4   | eukaryotic translation initiation factor 2B; subunit 4 delta; 67kDa                                        | -0.8618 | 0.003  |
| 209436_at   | SPON1    | spondin 1; extracellular matrix protein                                                                    | -4.1679 | 0      |
| 209437_s_at | SPON1    | spondin 1; extracellular matrix protein                                                                    | -0.6768 | 0      |
| 209451_at   | TANK     | TRAF family member-associated NFKB activator                                                               | -0.6198 | 0.0052 |
| 209454_s_at | TEAD3    | TEA domain family member 3                                                                                 | -0.4416 | 0.0095 |
| 209457_at   | DUSP5    | dual specificity phosphatase 5                                                                             | -1.1306 | 0.0278 |
| 209458_x_at | HBA1     | hemoglobin; alpha 1, hemoglobin; alpha 2                                                                   | -1.4089 | 0.0276 |

|             |                     |                                                                                                                        |         |        |
|-------------|---------------------|------------------------------------------------------------------------------------------------------------------------|---------|--------|
| 209467_s_at | MKNK1               | MAP kinase interacting serine/threonine kinase 1                                                                       | -1.095  | 0.0019 |
| 209468_at   | LRP5                | low density lipoprotein receptor-related protein 5                                                                     | -1.529  | 0.0004 |
| 209469_at   | GPM6A               | glycoprotein M6A                                                                                                       | -2.2815 | 0      |
| 209470_s_at | GPM6A               | glycoprotein M6A                                                                                                       | -2.5626 | 0      |
| 209472_at   | CCBL2               | cysteine conjugate-beta lyase 2                                                                                        | -1.1198 | 0.0002 |
| 209479_at   | CCDC28A             | coiled-coil domain containing 28A                                                                                      | -0.8505 | 0      |
| 209481_at   | SNRK                | SNF related kinase                                                                                                     | -0.3799 | 0.0349 |
| 209486_at   | SAS10               | disrupter of silencing 10                                                                                              | -0.5788 | 0.0009 |
| 209487_at   | RBPMS               | RNA binding protein with multiple splicing                                                                             | -1.5274 | 0.0015 |
| 209488_s_at | RBPMS               | RNA binding protein with multiple splicing                                                                             | -1.4633 | 0.0024 |
| 209493_at   | PDZD2               | PDZ domain containing 2                                                                                                | -0.7724 | 0.0053 |
| 209496_at   | RARRES2             | retinoic acid receptor responder (tazarotene induced) 2                                                                | -2.1468 | 0.0102 |
| 209499_x_at | TNFSF12-<br>TNFSF13 | tumor necrosis factor (ligand) superfamily; member 12-member 13, tumor necrosis factor (ligand) superfamily; member 13 | -1.8603 | 0      |
| 209500_x_at | TNFSF12-<br>TNFSF13 | tumor necrosis factor (ligand) superfamily; member 12-member 13, tumor necrosis factor (ligand) superfamily; member 13 | -1.8359 | 0      |
| 209503_s_at | PSMC5               | proteasome (prosome; macropain) 26S subunit; ATPase; 5                                                                 | -0.5038 | 0.0026 |
| 209505_at   | NR2F1               | Nuclear receptor subfamily 2; group F; member 1                                                                        | -2.939  | 0      |
| 209506_s_at | NR2F1               | nuclear receptor subfamily 2; group F; member 1                                                                        | -1.988  | 0      |
| 209512_at   | HSDL2               | hydroxysteroid dehydrogenase like 2                                                                                    | -1.1324 | 0.0009 |
| 209513_s_at | HSDL2               | hydroxysteroid dehydrogenase like 2                                                                                    | -0.9009 | 0.0005 |
| 209521_s_at | AMOT                | angiomin                                                                                                               | -0.1002 | 0.0481 |
| 209525_at   | HDGFRP3             | Hepatoma-derived growth factor; related protein 3                                                                      | -0.2934 | 0.0163 |
| 209531_at   | GSTZ1               | glutathione transferase zeta 1 (maleylacetoacetate isomerase)                                                          | -1.0696 | 0.0011 |
| 209540_at   | IGF1                | insulin-like growth factor 1 (somatomedin C)                                                                           | -2.622  | 0      |
| 209541_at   | IGF1                | insulin-like growth factor 1 (somatomedin C)                                                                           | -2.4101 | 0      |
| 209542_x_at | IGF1                | insulin-like growth factor 1 (somatomedin C)                                                                           | -0.8266 | 0.0006 |
| 209543_s_at | CD34                | CD34 molecule                                                                                                          | -0.6076 | 0.005  |
| 209552_at   | PAX8                | paired box 8                                                                                                           | -0.4708 | 0.0011 |
| 209558_s_at | HIP1R               | huntingtin interacting protein 1 related, similar to huntingtin interacting protein 1 related                          | -1.8124 | 0      |
| 209559_at   | HIP1R               | huntingtin interacting protein 1 related                                                                               | -0.5279 | 0.0031 |
| 209580_s_at | MBD4                | methyl-CpG binding domain protein 4                                                                                    | -0.6201 | 0.0018 |
| 209581_at   | HRASLS3             | HRAS-like suppressor 3                                                                                                 | -1.6591 | 0.0029 |



|             |          |                                                                                                             |         |        |
|-------------|----------|-------------------------------------------------------------------------------------------------------------|---------|--------|
| 209595_at   | GTF2F2   | general transcription factor IIF; polypeptide 2; 30kDa                                                      | -0.4887 | 0.0141 |
| 209596_at   | MXRA5    | matrix-remodelling associated 5                                                                             | -2.7465 | 0.0088 |
| 209600_s_at | ACOX1    | acyl-Coenzyme A oxidase 1; palmitoyl                                                                        | -1.1286 | 0.0029 |
| 209605_at   | TST      | thiosulfate sulfurtransferase (rhodanese)                                                                   | -1.2718 | 0.0064 |
| 209610_s_at | SLC1A4   | solute carrier family 1 (glutamate/neutral amino acid transporter); member 4                                | -1.6002 | 0.0008 |
| 209612_s_at | ADH1B    | alcohol dehydrogenase 1C (class I); gamma polypeptide, alcohol dehydrogenase 1B (class I); beta polypeptide | -6.142  | 0      |
| 209613_s_at | ADH1B    | alcohol dehydrogenase 1C (class I); gamma polypeptide, alcohol dehydrogenase 1B (class I); beta polypeptide | -6.1984 | 0      |
| 209614_at   | ADH1C    | alcohol dehydrogenase 1C (class I); gamma polypeptide                                                       | -3.6659 | 0      |
| 209616_s_at | CES1     | carboxylesterase 1 (monocyte/macrophage serine esterase 1)                                                  | -1.7303 | 0.0393 |
| 209619_at   | CD74     | CD74 molecule; major histocompatibility complex; class II invariant chain                                   | -1.7451 | 0.0024 |
| 209633_at   | PPP2R3A  | protein phosphatase 2 (formerly 2A); regulatory subunit B"; alpha                                           | -0.866  | 0.0037 |
| 209641_s_at | ABCC3    | ATP-binding cassette; sub-family C (CFTR/MRP); member 3                                                     | -2.5544 | 0.0001 |
| 209643_s_at | PLD2     | phospholipase D2                                                                                            | -0.303  | 0.0287 |
| 209650_s_at | TBC1D22A | TBC1 domain family; member 22A                                                                              | -0.4471 | 0.0009 |
| 209664_x_at | NFATC1   | nuclear factor of activated T-cells; cytoplasmic; calcineurin-dependent 1                                   | -0.1014 | 0.042  |
| 209674_at   | CRY1     | cryptochrome 1 (photolyase-like)                                                                            | -0.6295 | 0.0017 |
| 209681_at   | SLC19A2  | solute carrier family 19 (thiamine transporter); member 2                                                   | -1.4032 | 0.0002 |
| 209683_at   | FAM49A   | family with sequence similarity 49; member A                                                                | -1.8282 | 0.0022 |
| 209686_at   | S100B    | S100 calcium binding protein B                                                                              | -0.7532 | 0      |
| 209687_at   | CXCL12   | chemokine (C-X-C motif) ligand 12 (stromal cell-derived factor 1)                                           | -5.1303 | 0      |
| 209696_at   | FBP1     | fructose-1,6-bisphosphatase 1                                                                               | -2.7121 | 0      |
| 209706_at   | NKX3-1   | NK3 homeobox 1                                                                                              | -0.9456 | 0.0156 |
| 209708_at   | MOXD1    | monooxygenase; DBH-like 1                                                                                   | -2.9858 | 0      |
| 209716_at   | CSF1     | colony stimulating factor 1 (macrophage)                                                                    | -0.9892 | 0.0002 |
| 209717_at   | EVI5     | ecotropic viral integration site 5                                                                          | -0.9019 | 0.0006 |
| 209718_at   | NCAPH2   | non-SMC condensin II complex; subunit H2                                                                    | -0.1839 | 0.0366 |
| 209723_at   | SERPINB9 | serpin peptidase inhibitor; clade B (ovalbumin); member 9                                                   | -3.4238 | 0      |
| 209734_at   | NCKAP1L  | NCK-associated protein 1-like                                                                               | -0.8901 | 0.0065 |
| 209735_at   | ABCG2    | ATP-binding cassette; sub-family G (WHITE); member 2                                                        | -1.7991 | 0      |
| 209736_at   | SOX13    | SRY (sex determining region Y)-box 13                                                                       | -0.3121 | 0.0352 |

|             |          |                                                                                        |         |        |
|-------------|----------|----------------------------------------------------------------------------------------|---------|--------|
| 209747_at   | TGFB3    | transforming growth factor; beta 3                                                     | -0.602  | 0.0061 |
| 209751_s_at | SEDLP    | spondyloepiphyseal dysplasia; late; pseudogene, trafficking protein particle complex 2 | -0.7869 | 0.0009 |
| 209758_s_at | MFAP5    | microfibrillar associated protein 5                                                    | -2.0052 | 0      |
| 209763_at   | CHRD1    | chordin-like 1                                                                         | -1.5945 | 0      |
| 209771_x_at | CD24     | CD24 molecule                                                                          | -1.4488 | 0.0275 |
| 209774_x_at | CXCL2    | chemokine (C-X-C motif) ligand 2                                                       | -2.5442 | 0.0011 |
| 209789_at   | CORO2B   | coronin; actin binding protein; 2B                                                     | -0.877  | 0      |
| 209794_at   | SRGAP3   | SLIT-ROBO Rho GTPase activating protein 3                                              | -0.9791 | 0      |
| 209798_at   | NPAT     | nuclear protein; ataxia-telangiectasia locus                                           | -0.743  | 0.0031 |
| 209821_at   | IL33     | interleukin 33                                                                         | -2.5483 | 0      |
| 209824_s_at | ARNTL    | aryl hydrocarbon receptor nuclear translocator-like                                    | -1.9109 | 0      |
| 209827_s_at | IL16     | interleukin 16 (lymphocyte chemoattractant factor)                                     | -0.3749 | 0.0333 |
| 209828_s_at | IL16     | interleukin 16 (lymphocyte chemoattractant factor)                                     | -0.2138 | 0.006  |
| 209830_s_at | SLC9A3R2 | solute carrier family 9 (sodium/hydrogen exchanger); member 3 regulator 2              | -0.1856 | 0.0075 |
| 209840_s_at | LRRN3    | leucine rich repeat neuronal 3                                                         | -3.2733 | 0.0006 |
| 209841_s_at | LRRN3    | leucine rich repeat neuronal 3                                                         | -3.227  | 0.0002 |
| 209842_at   | SOX10    | SRY (sex determining region Y)-box 10                                                  | -0.2572 | 0.008  |
| 209843_s_at | SOX10    | SRY (sex determining region Y)-box 10                                                  | -0.2402 | 0.0121 |
| 209850_s_at | CDC42EP2 | CDC42 effector protein (Rho GTPase binding) 2                                          | -0.3557 | 0      |
| 209851_at   | ZC3H13   | zinc finger CCCH-type containing 13                                                    | -0.2096 | 0.0031 |
| 209879_at   | SELPLG   | selectin P ligand                                                                      | -1.0635 | 0.0099 |
| 209888_s_at | MYL1     | myosin; light chain 1; alkali; skeletal; fast                                          | -0.1509 | 0.009  |
| 209897_s_at | SLIT2    | slit homolog 2 (Drosophila)                                                            | -3.254  | 0.0009 |
| 209898_x_at | ITSN2    | intersectin 2                                                                          | -0.4096 | 0.0258 |
| 209901_x_at | AIF1     | allograft inflammatory factor 1                                                        | -3.0142 | 0      |
| 209904_at   | TNNC1    | troponin C type 1 (slow)                                                               | -0.7637 | 0      |
| 209906_at   | C3AR1    | complement component 3a receptor 1                                                     | -1.7644 | 0.0011 |
| 209907_s_at | ITSN2    | intersectin 2                                                                          | -0.6566 | 0.0271 |
| 209939_x_at | CFLAR    | CASP8 and FADD-like apoptosis regulator                                                | -0.6717 | 0.0178 |
| 209943_at   | FBXL4    | F-box and leucine-rich repeat protein 4                                                | -0.6173 | 0.0105 |
| 209944_at   | ZNF410   | zinc finger protein 410                                                                | -0.6638 | 0.0001 |
| 209948_at   | KCNMB1   | potassium large conductance calcium-activated channel; subfamily M; beta member 1      | -0.2664 | 0.0345 |
| 209950_s_at | VILL     | villin-like                                                                            | -0.318  | 0.0007 |
| 209959_at   | NR4A3    | nuclear receptor subfamily 4; group A; member 3                                        | -3.8063 | 0      |

|             |           |                                                                                                                |         |        |
|-------------|-----------|----------------------------------------------------------------------------------------------------------------|---------|--------|
| 209960_at   | HGF       | hepatocyte growth factor (hepapoietin A; scatter factor)                                                       | -3.757  | 0      |
| 209964_s_at | ATXN7     | ataxin 7                                                                                                       | -1.0069 | 0.0012 |
| 209967_s_at | CREM      | cAMP responsive element modulator                                                                              | -2.0119 | 0      |
| 209981_at   | CSDC2     | cold shock domain containing C2; RNA binding                                                                   | -2.8498 | 0.0002 |
| 209987_s_at | ASCL1     | achaete-scute complex homolog 1 (Drosophila)                                                                   | -0.1643 | 0.0024 |
| 209993_at   | ABCB1     | ATP-binding cassette; sub-family B (MDR/TAP); member 1                                                         | -2.5109 | 0.0014 |
| 209994_s_at | ABCB1     | ATP-binding cassette; sub-family B (MDR/TAP); member 1, ATP-binding cassette; sub-family B (MDR/TAP); member 4 | -2.2004 | 0.0043 |
| 210000_s_at | SOCS1     | suppressor of cytokine signaling 1                                                                             | -0.1093 | 0.0112 |
| 210002_at   | GATA6     | GATA binding protein 6                                                                                         | -1.5192 | 0.0025 |
| 210006_at   | ABHD14A   | abhydrolase domain containing 14A                                                                              | -0.8581 | 0.0044 |
| 210016_at   | MYT1L     | myelin transcription factor 1-like                                                                             | -0.1229 | 0.035  |
| 210027_s_at | APEX1     | APEX nuclease (multifunctional DNA repair enzyme) 1                                                            | -0.4977 | 0.0018 |
| 210042_s_at | CTSZ      | cathepsin Z                                                                                                    | -1.1245 | 0.0158 |
| 210044_s_at | LYL1      | lymphoblastic leukemia derived sequence 1                                                                      | -0.5378 | 0.0105 |
| 210055_at   | TSHR      | thyroid stimulating hormone receptor                                                                           | -0.1433 | 0.0492 |
| 210058_at   | MAPK13    | mitogen-activated protein kinase 13                                                                            | -2.167  | 0.0006 |
| 210059_s_at | MAPK13    | mitogen-activated protein kinase 13                                                                            | -1.7428 | 0.0003 |
| 210063_at   | SARDH     | sarcosine dehydrogenase                                                                                        | -0.2275 | 0.0006 |
| 210066_s_at | AQP4      | aquaporin 4                                                                                                    | -0.1484 | 0.0015 |
| 210073_at   | ST8SIA1   | ST8 alpha-N-acetyl-neuraminide alpha-2;8-sialyltransferase 1                                                   | -1.4116 | 0      |
| 210078_s_at | KCNAB1    | potassium voltage-gated channel; shaker-related subfamily; beta member 1                                       | -1.0038 | 0      |
| 210079_x_at | KCNAB1    | potassium voltage-gated channel; shaker-related subfamily; beta member 1                                       | -0.1408 | 0.0165 |
| 210082_at   | ABCA4     | ATP-binding cassette; sub-family A (ABC1); member 4                                                            | -0.1878 | 0.0043 |
| 210090_at   | ARC       | activity-regulated cytoskeleton-associated protein                                                             | -0.1472 | 0.0316 |
| 210096_at   | CYP4B1    | cytochrome P450; family 4; subfamily B; polypeptide 1                                                          | -3.3613 | 0      |
| 210099_at   | ABCA2     | ATP-binding cassette; sub-family A (ABC1); member 2                                                            | -0.1501 | 0.0177 |
| 210102_at   | LOH11CR2A | loss of heterozygosity; 11; chromosomal region 2; gene A                                                       | -1.3794 | 0.006  |
| 210121_at   | B3GALT2   | UDP-Gal:betaGlcNAc beta 1;3-galactosyltransferase; polypeptide 2                                               | -0.311  | 0.0152 |
| 210130_s_at | TM7SF2    | transmembrane 7 superfamily member 2                                                                           | -2.0505 | 0.0046 |
| 210139_s_at | PMP22     | peripheral myelin protein 22                                                                                   | -1.3755 | 0.0024 |
| 210142_x_at | FLOT1     | flotillin 1                                                                                                    | -0.8727 | 0      |
| 210144_at   | TBC1D22A  | TBC1 domain family; member 22A                                                                                 | -0.4811 | 0.0054 |

|             |         |                                                                                           |         |        |
|-------------|---------|-------------------------------------------------------------------------------------------|---------|--------|
| 210145_at   | PLA2G4A | phospholipase A2; group IVA (cytosolic; calcium-dependent)                                | -4.7472 | 0      |
| 210155_at   | MYOC    | myocilin; trabecular meshwork inducible glucocorticoid response                           | -0.1966 | 0.0023 |
| 210162_s_at | NFATC1  | nuclear factor of activated T-cells; cytoplasmic; calcineurin-dependent 1                 | -0.3215 | 0.0155 |
| 210168_at   | C6      | complement component 6                                                                    | -0.5964 | 0      |
| 210171_s_at | CREM    | cAMP responsive element modulator                                                         | -0.3192 | 0.0023 |
| 210190_at   | STX11   | syntaxin 11                                                                               | -0.2385 | 0.0042 |
| 210198_s_at | PLP1    | proteolipid protein 1 (Pelizaeus-Merzbacher disease; spastic paraplegia 2; uncomplicated) | -0.7638 | 0.0059 |
| 210199_at   | CRYAA   | crystallin; alpha A                                                                       | -0.1693 | 0.0006 |
| 210201_x_at | BIN1    | bridging integrator 1                                                                     | -1.1695 | 0.0053 |
| 210202_s_at | BIN1    | bridging integrator 1                                                                     | -1.7158 | 0.0046 |
| 210205_at   | B3GALT4 | UDP-Gal:betaGlcNAc beta 1;3-galactosyltransferase; polypeptide 4                          | -0.5371 | 0.0114 |
| 210208_x_at | BAT3    | HLA-B associated transcript 3                                                             | -0.2709 | 0.0415 |
| 210214_s_at | BMPR2   | bone morphogenetic protein receptor; type II (serine/threonine kinase)                    | -0.6872 | 0.0029 |
| 210221_at   | CHRNA3  | cholinergic receptor; nicotinic; alpha 3                                                  | -0.9501 | 0.0322 |
| 210225_x_at | LILRB3  | leukocyte immunoglobulin-like receptor; subfamily B (with TM and ITIM domains); member 3  | -0.2968 | 0.0334 |
| 210227_at   | DLGAP2  | discs; large (Drosophila) homolog-associated protein 2                                    | -0.1086 | 0.0307 |
| 210229_s_at | CSF2    | colony stimulating factor 2 (granulocyte-macrophage)                                      | -0.1395 | 0.0416 |
| 210239_at   | IRX5    | iroquois homeobox 5                                                                       | -0.204  | 0.0003 |
| 210243_s_at | B4GALT3 | UDP-Gal:betaGlcNAc beta 1;4-galactosyltransferase; polypeptide 3                          | -0.41   | 0.0457 |
| 210245_at   | ABCC8   | ATP-binding cassette; sub-family C (CFTR/MRP); member 8                                   | -0.1578 | 0.0246 |
| 210246_s_at | ABCC8   | ATP-binding cassette; sub-family C (CFTR/MRP); member 8                                   | -0.2626 | 0.0031 |
| 210248_at   | WNT7A   | wingless-type MMTV integration site family; member 7A                                     | -0.1508 | 0.0065 |
| 210253_at   | HTATIP2 | HIV-1 Tat interactive protein 2; 30kDa                                                    | -1.031  | 0.0141 |
| 210254_at   | MS4A3   | membrane-spanning 4-domains; subfamily A; member 3 (hematopoietic cell-specific)          | -0.1197 | 0.0152 |
| 210255_at   | RAD51L1 | RAD51-like 1 (S. cerevisiae)                                                              | -0.1739 | 0.023  |
| 210261_at   | KCNK2   | potassium channel; subfamily K; member 2                                                  | -2.9588 | 0      |
| 210262_at   | CRISP2  | cysteine-rich secretory protein 2                                                         | -0.1538 | 0.0093 |
| 210263_at   | KCNF1   | potassium voltage-gated channel; subfamily F; member 1                                    | -0.1829 | 0.0275 |
| 210270_at   | RGS6    | regulator of G-protein signaling 6                                                        | -0.1701 | 0.0282 |
| 210275_s_at | ZFAND5  | zinc finger; AN1-type domain 5                                                            | -0.7827 | 0      |
| 210289_at   | NAT8    | N-acetyltransferase 8, N-acetyltransferase 8B (gene/pseudogene)                           | -0.1275 | 0.0185 |

|             |                 |                                                                                                                        |         |        |
|-------------|-----------------|------------------------------------------------------------------------------------------------------------------------|---------|--------|
| 210292_s_at | PCDH11X         | protocadherin 11 X-linked, protocadherin 11 Y-linked                                                                   | -0.2364 | 0.0047 |
| 210293_s_at | SEC23B          | Sec23 homolog B ( <i>S. cerevisiae</i> )                                                                               | -0.307  | 0.0117 |
| 210295_at   | MAGEA10         | melanoma antigen family A; 10                                                                                          | -0.1385 | 0.0276 |
| 210298_x_at | FHL1            | four and a half LIM domains 1                                                                                          | -0.5602 | 0.0437 |
| 210299_s_at | FHL1            | four and a half LIM domains 1                                                                                          | -1.7985 | 0      |
| 210300_at   | REM1            | RAS (RAD and GEM)-like GTP-binding 1                                                                                   | -0.5298 | 0      |
| 210304_at   | PDE6B           | phosphodiesterase 6B; cGMP-specific; rod; beta (congenital stationary night blindness 3; autosomal dominant)           | -0.135  | 0.0277 |
| 210314_x_at | TNFSF12-TNFSF13 | tumor necrosis factor (ligand) superfamily; member 12-member 13, tumor necrosis factor (ligand) superfamily; member 13 | -2.4626 | 0      |
| 210316_at   | FLT4            | fms-related tyrosine kinase 4                                                                                          | -0.1167 | 0.0494 |
| 210318_at   | RBP3            | retinol binding protein 3; interstitial                                                                                | -0.1636 | 0.0097 |
| 210324_at   | C8G             | complement component 8; gamma polypeptide                                                                              | -0.2645 | 0.0007 |
| 210340_s_at | CSF2RA          | colony stimulating factor 2 receptor; alpha; low-affinity (granulocyte-macrophage)                                     | -0.3224 | 0.0009 |
| 210342_s_at | TPO             | thyroid peroxidase                                                                                                     | -0.1753 | 0.0011 |
| 210363_s_at | SCN2B           | sodium channel; voltage-gated; type II; beta                                                                           | -0.2221 | 0.0018 |
| 210372_s_at | TPD52L1         | tumor protein D52-like 1                                                                                               | -2.216  | 0.0005 |
| 210375_at   | PTGER3          | prostaglandin E receptor 3 (subtype EP3)                                                                               | -0.5387 | 0.0008 |
| 210381_s_at | CCKBR           | cholecystokinin B receptor                                                                                             | -0.1479 | 0.0263 |
| 210390_s_at | CCL14           | chemokine (C-C motif) ligand 14, chemokine (C-C motif) ligand 15                                                       | -0.1511 | 0.0232 |
| 210403_s_at | KCNJ1           | potassium inwardly-rectifying channel; subfamily J; member 1                                                           | -0.1748 | 0.0108 |
| 210408_s_at | CPNE6           | copine VI (neuronal)                                                                                                   | -0.1037 | 0.0133 |
| 210422_x_at | SLC11A1         | solute carrier family 11 (proton-coupled divalent metal ion transporters); member 1                                    | -0.3635 | 0      |
| 210423_s_at | SLC11A1         | solute carrier family 11 (proton-coupled divalent metal ion transporters); member 1                                    | -0.9505 | 0.0209 |
| 210442_at   | IL1RL1          | interleukin 1 receptor-like 1                                                                                          | -0.1374 | 0.0162 |
| 210445_at   | FABP6           | fatty acid binding protein 6; ileal (gastrotropin)                                                                     | -2.1875 | 0.0171 |
| 210450_at   | LOC90925        | hypothetical protein LOC90925                                                                                          | -0.1885 | 0.0222 |
| 210451_at   | PKLR            | pyruvate kinase; liver and RBC                                                                                         | -0.1071 | 0.0459 |
| 210453_x_at | ATP5L           | ATP synthase; H <sup>+</sup> transporting; mitochondrial F0 complex; subunit G                                         | -0.532  | 0.0007 |
| 210461_s_at | ABLIM1          | actin binding LIM protein 1                                                                                            | -1.6952 | 0      |
| 210469_at   | DLG5            | discs; large homolog 5 ( <i>Drosophila</i> )                                                                           | -1.2845 | 0.0005 |
| 210471_s_at | KCNAB1          | potassium voltage-gated channel; shaker-related subfamily; beta member 1                                               | -0.3234 | 0.0002 |

|             |         |                                                                                                        |         |        |
|-------------|---------|--------------------------------------------------------------------------------------------------------|---------|--------|
| 210474_s_at | CDC2L1  | cell division cycle 2-like 1 (PITSLRE proteins), cell division cycle 2-like 2 (PITSLRE proteins)       | -0.2812 | 0.0307 |
| 210475_at   | POU3F1  | POU class 3 homeobox 1                                                                                 | -0.5747 | 0.0006 |
| 210487_at   | DNTT    | deoxynucleotidyltransferase; terminal                                                                  | -0.1045 | 0.038  |
| 210506_at   | FUT7    | fucosyltransferase 7 (alpha (1;3) fucosyltransferase)                                                  | -0.1294 | 0.0126 |
| 210515_at   | TCF1    | transcription factor 1; hepatic; LF-B1; hepatic nuclear factor (HNF1); albumin proximal factor         | -0.1521 | 0.0319 |
| 210517_s_at | AKAP12  | A kinase (PRKA) anchor protein (gravin) 12                                                             | -2.018  | 0.0018 |
| 210524_x_at |         |                                                                                                        | -1.1686 | 0.0086 |
| 210532_s_at | C14orf2 | chromosome 14 open reading frame 2                                                                     | -0.2341 | 0.0225 |
| 210536_s_at | SPAM1   | sperm adhesion molecule 1 (PH-20 hyaluronidase; zona pellucida binding)                                | -0.1297 | 0.0145 |
| 210544_s_at | ALDH3A2 | aldehyde dehydrogenase 3 family; member A2                                                             | -1.9591 | 0      |
| 210545_at   | ITSN2   | intersectin 2                                                                                          | -0.1543 | 0.006  |
| 210548_at   | CCL23   | chemokine (C-C motif) ligand 23                                                                        | -0.2837 | 0      |
| 210549_s_at | CCL23   | chemokine (C-C motif) ligand 23                                                                        | -0.3966 | 0.0006 |
| 210557_x_at | CSF1    | colony stimulating factor 1 (macrophage)                                                               | -0.2272 | 0.0064 |
| 210560_at   | GBX2    | gastrulation brain homeobox 2                                                                          | -0.1373 | 0.032  |
| 210563_x_at | CFLAR   | CASP8 and FADD-like apoptosis regulator                                                                | -0.7464 | 0.0185 |
| 210565_at   | GCGR    | glucagon receptor                                                                                      | -0.1182 | 0.0162 |
| 210569_s_at | SIGLEC9 | sialic acid binding Ig-like lectin 9                                                                   | -0.3057 | 0.001  |
| 210571_s_at | CMAH    | cytidine monophosphate-N-acetylneuraminic acid hydroxylase (CMP-N-acetylneuraminic acid monooxygenase) | -0.4206 | 0.0043 |
| 210574_s_at | NUDC    | nuclear distribution gene C homolog (A. nidulans)                                                      | -0.4949 | 0.0009 |
| 210575_at   | NUDC    | nuclear distribution gene C homolog (A. nidulans)                                                      | -0.1707 | 0.0002 |
| 210579_s_at | TRIM10  | tripartite motif-containing 10                                                                         | -0.1074 | 0.0229 |
| 210583_at   | POLDIP3 | polymerase (DNA-directed); delta interacting protein 3                                                 | -0.1527 | 0.0283 |
| 210592_s_at | SAT1    | spermidine/spermine N1-acetyltransferase 1                                                             | -0.7714 | 0.0001 |
| 210597_x_at | PRB1    | proline-rich protein BstNI subfamily 1, proline-rich protein BstNI subfamily 2                         | -0.3783 | 0.013  |
| 210609_s_at | TP53I3  | tumor protein p53 inducible protein 3                                                                  | -1.2023 | 0.0479 |
| 210613_s_at | SYNGR1  | synaptogyrin 1                                                                                         | -1.1168 | 0.019  |
| 210618_at   | RAP1GAP | RAP1 GTPase activating protein                                                                         | -0.1448 | 0.0095 |
| 210626_at   | AKAP1   | A kinase (PRKA) anchor protein 1                                                                       | -0.2291 | 0.0012 |
| 210628_x_at | LTBP4   | latent transforming growth factor beta binding protein 4                                               | -0.3736 | 0.0001 |
| 210629_x_at | LST1    | leukocyte specific transcript 1                                                                        | -0.6177 | 0.0231 |

|             |          |                                                                                         |         |        |
|-------------|----------|-----------------------------------------------------------------------------------------|---------|--------|
| 210632_s_at | SGCA     | sarcoglycan; alpha (50kDa dystrophin-associated glycoprotein)                           | -0.1319 | 0.04   |
| 210638_s_at | FBXO9    | F-box protein 9                                                                         | -0.8816 | 0      |
| 210644_s_at | LAIR1    | leukocyte-associated immunoglobulin-like receptor 1                                     | -0.9991 | 0.0472 |
| 210653_s_at | BCKDHB   | branched chain keto acid dehydrogenase E1; beta polypeptide (maple syrup urine disease) | -0.8431 | 0.0006 |
| 210657_s_at | 4-Sep    | septin 4                                                                                | -3.465  | 0      |
| 210659_at   | CMKLR1   | chemokine-like receptor 1                                                               | -0.3613 | 0.0001 |
| 210660_at   | LILRA1   | leukocyte immunoglobulin-like receptor; subfamily A (with TM domain); member 1          | -0.2572 | 0.0062 |
| 210663_s_at | KYNU     | kynureninase (L-kynurenine hydrolase)                                                   | -0.4017 | 0.0191 |
| 210677_at   | SOAT2    | sterol O-acyltransferase 2                                                              | -0.1398 | 0.0045 |
| 210687_at   | CPT1A    | carnitine palmitoyltransferase 1A (liver)                                               | -0.5442 | 0      |
| 210702_s_at | PTGIS    | prostaglandin I2 (prostacyclin) synthase                                                | -0.1208 | 0.0311 |
| 210705_s_at | TRIM5    | tripartite motif-containing 5                                                           | -0.4969 | 0.0116 |
| 210715_s_at | SPINT2   | serine peptidase inhibitor; Kunitz type; 2                                              | -1.2756 | 0.0063 |
| 210728_s_at | CALCA    | calcitonin/calcitonin-related polypeptide; alpha                                        | -0.1438 | 0.029  |
| 210737_at   | TUB      | tubby homolog (mouse)                                                                   | -0.2282 | 0.0032 |
| 210750_s_at | DLGAP1   | discs; large (Drosophila) homolog-associated protein 1                                  | -0.2074 | 0.0027 |
| 210751_s_at | RGN      | regucalcin (senescence marker protein-30)                                               | -1.6886 | 0.0002 |
| 210752_s_at | MLX      | MAX-like protein X                                                                      | -0.3787 | 0.0059 |
| 210764_s_at | CYR61    | cysteine-rich; angiogenic inducer; 61                                                   | -3.2213 | 0.0001 |
| 210773_s_at | FPRL1    | formyl peptide receptor-like 1                                                          | -0.1178 | 0.0129 |
| 210774_s_at | NCOA4    | nuclear receptor coactivator 4                                                          | -0.2435 | 0.0268 |
| 210775_x_at | CASP9    | caspase 9; apoptosis-related cysteine peptidase                                         | -4.3135 | 0      |
| 210781_x_at | GRIN1    | glutamate receptor; ionotropic; N-methyl D-aspartate 1                                  | -0.2064 | 0.0055 |
| 210785_s_at | C1orf38  | chromosome 1 open reading frame 38                                                      | -1.639  | 0.0058 |
| 210789_x_at | CEACAM3  | carcinoembryonic antigen-related cell adhesion molecule 3                               | -0.1698 | 0.0397 |
| 210793_s_at | NUP98    | nucleoporin 98kDa                                                                       | -1.366  | 0.0001 |
| 210798_x_at | MASP2    | mannan-binding lectin serine peptidase 2                                                | -0.1794 | 0.0029 |
| 210810_s_at | SLC6A5   | solute carrier family 6 (neurotransmitter transporter; glycine); member 5               | -0.1053 | 0.0483 |
| 210817_s_at | CALCOCO2 | calcium binding and coiled-coil domain 2                                                | -0.8056 | 0      |
| 210819_x_at | DIO2     | deiodinase; iodothyronine; type II                                                      | -0.1369 | 0.0253 |
| 210825_s_at | PEBP1    | phosphatidylethanolamine binding protein 1                                              | -0.3242 | 0.0099 |
| 210838_s_at | ACVRL1   | activin A receptor type II-like 1                                                       | -0.3669 | 0      |

|             |         |                                                                                                                                      |         |        |
|-------------|---------|--------------------------------------------------------------------------------------------------------------------------------------|---------|--------|
| 210841_s_at | NRP2    | neuropilin 2                                                                                                                         | -0.217  | 0.0346 |
| 210847_x_at | PLEKHG5 | pleckstrin homology domain containing; family G (with RhoGef domain) member 5, tumor necrosis factor receptor superfamily; member 25 | -0.2347 | 0.0335 |
| 210864_x_at | HFE     | hemochromatosis                                                                                                                      | -0.1974 | 0.0174 |
| 210869_s_at | MCAM    | melanoma cell adhesion molecule                                                                                                      | -0.9124 | 0.0376 |
| 210880_s_at | EFS     | embryonal Fyn-associated substrate                                                                                                   | -0.2078 | 0.0095 |
| 210909_x_at | LPAL2   | lipoprotein; Lp(a)-like 2                                                                                                            | -0.1538 | 0.0199 |
| 210923_at   | SLC1A7  | solute carrier family 1 (glutamate transporter); member 7                                                                            | -0.1435 | 0.0297 |
| 210924_at   | OLFM1   | olfactomedin 1                                                                                                                       | -0.1417 | 0.0391 |
| 210942_s_at | ST3GAL6 | ST3 beta-galactoside alpha-2;3-sialyltransferase 6                                                                                   | -1.592  | 0.0016 |
| 210946_at   | PPAP2A  | phosphatidic acid phosphatase type 2A                                                                                                | -0.8751 | 0.0021 |
| 210952_at   | AP4S1   | adaptor-related protein complex 4; sigma 1 subunit                                                                                   | -0.1883 | 0.0267 |
| 210955_at   | CASP10  | caspase 10; apoptosis-related cysteine peptidase                                                                                     | -0.2198 | 0.022  |
| 210958_s_at | MAST4   | microtubule associated serine/threonine kinase family member 4                                                                       | -0.6689 | 0.0398 |
| 210960_at   | ADRA1D  | adrenergic; alpha-1D-; receptor                                                                                                      | -0.167  | 0.0068 |
| 210967_x_at | CACNB1  | calcium channel; voltage-dependent; beta 1 subunit                                                                                   | -0.1724 | 0.0151 |
| 210971_s_at | ARNTL   | aryl hydrocarbon receptor nuclear translocator-like                                                                                  | -1.1503 | 0.0032 |
| 210982_s_at | HLA-DRA | major histocompatibility complex; class II; DR alpha                                                                                 | -2.2024 | 0.0075 |
| 210986_s_at | TPM1    | tropomyosin 1 (alpha)                                                                                                                | -0.5418 | 0.0213 |
| 211001_at   | TRIM29  | tripartite motif-containing 29                                                                                                       | -0.1204 | 0.0265 |
| 211002_s_at | TRIM29  | tripartite motif-containing 29                                                                                                       | -0.1387 | 0.0474 |
| 211004_s_at | ALDH3B1 | aldehyde dehydrogenase 3 family; member B1                                                                                           | -0.8552 | 0      |
| 211023_at   | PDHB    | pyruvate dehydrogenase (lipoamide) beta                                                                                              | -0.5755 | 0      |
| 211032_at   | COBLL1  | COBL-like 1                                                                                                                          | -0.9049 | 0      |
| 211033_s_at | PEX7    | peroxisomal biogenesis factor 7                                                                                                      | -1.004  | 0.0006 |
| 211067_s_at | GAS7    | growth arrest-specific 7                                                                                                             | -0.2961 | 0.0062 |
| 211069_s_at | SUMO1   | SMT3 suppressor of mif two 3 homolog 1 (S. cerevisiae)                                                                               | -0.2555 | 0.042  |
| 211073_x_at | RPL3    | ribosomal protein L3                                                                                                                 | -0.1917 | 0.0114 |
| 211101_x_at | LILRA2  | leukocyte immunoglobulin-like receptor; subfamily A (with TM domain); member 2                                                       | -0.251  | 0.0038 |
| 211102_s_at | LILRA2  | leukocyte immunoglobulin-like receptor; subfamily A (with TM domain); member 2                                                       | -0.1263 | 0.0427 |
| 211104_s_at | MYO7A   | myosin VIIA                                                                                                                          | -0.2031 | 0.0481 |
| 211105_s_at | NFATC1  | nuclear factor of activated T-cells; cytoplasmic; calcineurin-dependent 1                                                            | -0.8792 | 0.0006 |



|             |          |                                                                                          |         |        |
|-------------|----------|------------------------------------------------------------------------------------------|---------|--------|
| 211113_s_at | ABCG1    | ATP-binding cassette; sub-family G (WHITE); member 1                                     | -1.4341 | 0.0013 |
| 211125_x_at | GRIN1    | glutamate receptor; ionotropic; N-methyl D-aspartate 1                                   | -0.1725 | 0.0087 |
| 211135_x_at | LILRB3   | leukocyte immunoglobulin-like receptor; subfamily B (with TM and ITIM domains); member 3 | -0.4031 | 0.026  |
| 211142_x_at | HLA-DOA  | major histocompatibility complex; class II; DO alpha                                     | -0.2616 | 0.0106 |
| 211143_x_at | NR4A1    | nuclear receptor subfamily 4; group A; member 1                                          | -1.1459 | 0      |
| 211149_at   | UTY      | ubiquitously transcribed tetratricopeptide repeat gene; Y-linked                         | -1.2118 | 0.0198 |
| 211175_at   | GPR45    | G protein-coupled receptor 45                                                            | -0.1369 | 0.0166 |
| 211177_s_at | TXNRD2   | thioredoxin reductase 2                                                                  | -0.9615 | 0.0001 |
| 211181_x_at | RUNX1    | runt-related transcription factor 1 (acute myeloid leukemia 1; aml1 oncogene)            | -0.1103 | 0.0434 |
| 211182_x_at | RUNX1    | runt-related transcription factor 1 (acute myeloid leukemia 1; aml1 oncogene)            | -0.1545 | 0.0025 |
| 211184_s_at | USH1C    | Usher syndrome 1C (autosomal recessive; severe)                                          | -0.2241 | 0.0011 |
| 211197_s_at | ICOSLG   | inducible T-cell co-stimulator ligand                                                    | -0.413  | 0      |
| 211198_s_at | ICOSLG   | inducible T-cell co-stimulator ligand                                                    | -0.1443 | 0.035  |
| 211199_s_at | ICOSLG   | inducible T-cell co-stimulator ligand                                                    | -0.1279 | 0.0248 |
| 211203_s_at | CNTN1    | contactin 1                                                                              | -0.3464 | 0.0091 |
| 211215_x_at | DIO2     | deiodinase; iodothyronine; type II                                                       | -0.2536 | 0.0001 |
| 211217_s_at | KCNQ1    | potassium voltage-gated channel; KQT-like subfamily; member 1                            | -3.3918 | 0      |
| 211218_at   | PRO1848  | PRO1848 protein                                                                          | -0.1056 | 0.0226 |
| 211223_at   | PROP1    | PROP paired-like homeobox 1                                                              | -0.1642 | 0.0169 |
| 211226_at   | GALR2    | galanin receptor 2                                                                       | -0.1053 | 0.03   |
| 211231_x_at | CYP4A11  | cytochrome P450; family 4; subfamily A; polypeptide 11                                   | -0.1678 | 0.0143 |
| 211235_s_at | ESR1     | estrogen receptor 1                                                                      | -0.1462 | 0.0307 |
| 211240_x_at | CTNND1   | catenin (cadherin-associated protein); delta 1                                           | -0.3237 | 0.049  |
| 211241_at   | ANXA2P3  | annexin A2 pseudogene 3                                                                  | -0.2319 | 0.0389 |
| 211242_x_at | KIR2DL4  | killer cell immunoglobulin-like receptor; two domains; long cytoplasmic tail; 4          | -0.2254 | 0.0009 |
| 211248_s_at | CHRD     | chordin                                                                                  | -0.4335 | 0.0038 |
| 211253_x_at | PYY      | peptide YY                                                                               | -0.1451 | 0.0327 |
| 211261_at   |          |                                                                                          | -0.1717 | 0.0189 |
| 211269_s_at | IL2RA    | interleukin 2 receptor; alpha                                                            | -0.3497 | 0.0015 |
| 211275_s_at | GYG1     | glycogenin 1                                                                             | -0.6367 | 0.006  |
| 211276_at   | TCEAL2   | transcription elongation factor A (SII)-like 2                                           | -1.3259 | 0.02   |
| 211282_x_at | TNFRSF25 | tumor necrosis factor receptor superfamily; member 25                                    | -0.3348 | 0.004  |

|             |           |                                                                                                                                                                        |         |        |
|-------------|-----------|------------------------------------------------------------------------------------------------------------------------------------------------------------------------|---------|--------|
| 211289_x_at | CDC2L1    | cell division cycle 2-like 1 (PITSLRE proteins), cell division cycle 2-like 2 (PITSLRE proteins)                                                                       | -0.3351 | 0.0268 |
| 211304_x_at | KCNJ5     | potassium inwardly-rectifying channel; subfamily J; member 5                                                                                                           | -0.4122 | 0.0003 |
| 211307_s_at | FCAR      | Fc fragment of IgA; receptor for                                                                                                                                       | -0.1747 | 0.0062 |
| 211313_s_at | BAZ1B     | bromodomain adjacent to zinc finger domain; 1B                                                                                                                         | -0.2133 | 0.0344 |
| 211315_s_at | CACNA1G   | calcium channel; voltage-dependent; T type; alpha 1G subunit                                                                                                           | -0.1807 | 0.0336 |
| 211324_s_at | RGPD5     | RANBP2-like and GRIP domain containing 5, RANBP2-like and GRIP domain containing 6, RANBP2-like and GRIP domain containing 7, RANBP2-like and GRIP domain containing 8 | -0.4899 | 0.0121 |
| 211340_s_at | MCAM      | melanoma cell adhesion molecule                                                                                                                                        | -0.8037 | 0.0134 |
| 211359_s_at | OPRM1     | opioid receptor; mu 1                                                                                                                                                  | -0.1079 | 0.0474 |
| 211377_x_at | MYCN      | v-myc myelocytomatosis viral related oncogene; neuroblastoma derived (avian)                                                                                           | -0.1218 | 0.0377 |
| 211381_x_at | SPAG11B   | sperm associated antigen 11B                                                                                                                                           | -0.1765 | 0.0047 |
| 211384_s_at | CASR      | calcium-sensing receptor (hypocalciuric hypercalcemia 1; severe neonatal hyperparathyroidism)                                                                          | -0.1426 | 0.0419 |
| 211385_x_at | SULT1A2   | sulfotransferase family; cytosolic; 1A; phenol-preferring; member 2                                                                                                    | -0.6562 | 0.0283 |
| 211407_at   | NDUFB7    | NADH dehydrogenase (ubiquinone) 1 beta subcomplex; 7; 18kDa                                                                                                            | -0.1586 | 0.0453 |
| 211413_s_at | PADI4     | peptidyl arginine deiminase; type IV                                                                                                                                   | -0.1997 | 0.0328 |
| 211414_at   | GLS       | glutaminase                                                                                                                                                            | -0.1191 | 0.0281 |
| 211421_s_at | RET       | ret proto-oncogene                                                                                                                                                     | -0.9713 | 0.0048 |
| 211436_at   |           | Clone FLB4228 PRO1095                                                                                                                                                  | -0.1032 | 0.0427 |
| 211438_at   | TRHR      | thyrotropin-releasing hormone receptor                                                                                                                                 | -0.1013 | 0.0493 |
| 211439_at   | SFRS7     | splicing factor; arginine/serine-rich 7; 35kDa                                                                                                                         | -0.244  | 0.0002 |
| 211447_s_at | PDE4A     | phosphodiesterase 4A; cAMP-specific (phosphodiesterase E2 dunce homolog; Drosophila)                                                                                   | -0.2641 | 0.0172 |
| 211455_at   | LOC651198 | similar to IFP38                                                                                                                                                       | -0.1507 | 0.005  |
| 211456_x_at | MT1P2     | metallothionein 1 pseudogene 2                                                                                                                                         | -0.6553 | 0.0015 |
| 211460_at   | TTY9A     | testis-specific transcript; Y-linked 9A, testis-specific transcript; Y-linked 9B                                                                                       | -0.1176 | 0.0195 |
| 211461_at   | CSPG4LYP1 | chondroitin sulfate proteoglycan 4-like; Y-linked pseudogene 1, chondroitin sulfate proteoglycan 4-like; Y-linked pseudogene 2                                         | -0.1621 | 0.0033 |
| 211472_at   | PLXNB2    | Plexin B2                                                                                                                                                              | -0.1412 | 0.0266 |
| 211473_s_at | COL4A6    | collagen; type IV; alpha 6                                                                                                                                             | -0.1352 | 0.0093 |
| 211474_s_at | SERPINB6  | serpin peptidase inhibitor; clade B (ovalbumin); member 6                                                                                                              | -0.5873 | 0.002  |
| 211475_s_at | BAG1      | BCL2-associated athanogene                                                                                                                                             | -0.7841 | 0.0073 |

|             |                     |                                                                                                                        |         |        |
|-------------|---------------------|------------------------------------------------------------------------------------------------------------------------|---------|--------|
| 211485_s_at | FGF18               | fibroblast growth factor 18                                                                                            | -0.1149 | 0.0407 |
| 211495_x_at | TNFSF12-<br>TNFSF13 | tumor necrosis factor (ligand) superfamily; member 12-member 13, tumor necrosis factor (ligand) superfamily; member 13 | -1.1103 | 0      |
| 211498_s_at | NKX3-1              | NK3 homeobox 1                                                                                                         | -0.187  | 0.0277 |
| 211531_x_at | PRB1                | proline-rich protein BstNI subfamily 1, proline-rich protein BstNI subfamily 2                                         | -0.4899 | 0.0074 |
| 211542_x_at | RPS10               | ribosomal protein S10                                                                                                  | -0.1778 | 0.0085 |
| 211557_x_at | SLCO2B1             | solute carrier organic anion transporter family; member 2B1                                                            | -0.8645 | 0.0002 |
| 211562_s_at | LMOD1               | leiomodoin 1 (smooth muscle)                                                                                           | -0.8205 | 0      |
| 211566_x_at | BRE                 | brain and reproductive organ-expressed (TNFRSF1A modulator)                                                            | -1.8506 | 0      |
| 211567_at   |                     |                                                                                                                        | -0.1282 | 0.048  |
| 211571_s_at | VCAN                | versican                                                                                                               | -2.3491 | 0.0075 |
| 211577_s_at | IGF1                | insulin-like growth factor 1 (somatomedin C)                                                                           | -0.5241 | 0.0023 |
| 211581_x_at | LST1                | leukocyte specific transcript 1                                                                                        | -0.7826 | 0.0177 |
| 211582_x_at | LST1                | leukocyte specific transcript 1                                                                                        | -1.0068 | 0.0078 |
| 211597_s_at | HOP                 | homeodomain-only protein                                                                                               | -3.5845 | 0.0001 |
| 211608_at   |                     | Rearranged TCR Vbeta 12.3 mRNA for T cell receptor                                                                     | -0.1212 | 0.0494 |
| 211619_s_at | ALPP                | alkaline phosphatase; placental (Regan isozyme), alkaline phosphatase; placental-like 2                                | -0.1837 | 0.005  |
| 211620_x_at | RUNX1               | runt-related transcription factor 1 (acute myeloid leukemia 1; aml1 oncogene)                                          | -0.1332 | 0.0005 |
| 211628_x_at | FTHP1               | ferritin; heavy polypeptide pseudogene 1                                                                               | -0.3603 | 0.0073 |
| 211641_x_at |                     | Isolate Middle91 immunoglobulin heavy chain variable region (IGVH)                                                     | -0.1299 | 0.0382 |
| 211656_x_at | HLA-DQB1            | major histocompatibility complex; class II; DQ beta 1                                                                  | -1.3141 | 0.0399 |
| 211659_at   | GPR135              | G protein-coupled receptor 135                                                                                         | -0.3226 | 0.0008 |
| 211663_x_at | PTGDS               | prostaglandin D2 synthase 21kDa (brain)                                                                                | -3.8751 | 0      |
| 211666_x_at | RPL3                | ribosomal protein L3                                                                                                   | -0.31   | 0.0213 |
| 211667_x_at |                     | T cell receptor alpha chain (TRCAV2S1-N-AJ41-C) mRNA; anti-melanoma cytotoxic T lymphocyte clone MU-45; -63; -79       | -0.1406 | 0.0254 |
| 211694_at   | TSSK1B              | testis-specific serine kinase 1B                                                                                       | -0.1384 | 0.0068 |
| 211696_x_at | HBB                 | hemoglobin; beta                                                                                                       | -1.5903 | 0.021  |
| 211697_x_at | PNO1                | partner of NOB1 homolog (S. cerevisiae)                                                                                | -0.3953 | 0.0224 |
| 211698_at   | EID1                | EP300 interacting inhibitor of differentiation 1                                                                       | -0.424  | 0.0074 |
| 211699_x_at | HBA1                | hemoglobin; alpha 1, hemoglobin; alpha 2                                                                               | -1.3365 | 0.0398 |
| 211703_s_at | TM2D1               | TM2 domain containing 1                                                                                                | -0.8764 | 0.0215 |
| 211705_s_at | SORBS1              | sorbin and SH3 domain containing 1                                                                                     | -0.1436 | 0.0068 |

|             |          |                                                                                                                                                                                                                                                                                                                                                                                                                                                                                      |         |        |
|-------------|----------|--------------------------------------------------------------------------------------------------------------------------------------------------------------------------------------------------------------------------------------------------------------------------------------------------------------------------------------------------------------------------------------------------------------------------------------------------------------------------------------|---------|--------|
| 211717_at   | ANKRD40  | ankyrin repeat domain 40                                                                                                                                                                                                                                                                                                                                                                                                                                                             | -0.3085 | 0.049  |
| 211726_s_at | FMO2     | flavin containing monooxygenase 2 (non-functional)                                                                                                                                                                                                                                                                                                                                                                                                                                   | -5.5456 | 0      |
| 211730_s_at | POLR2L   | polymerase (RNA) II (DNA directed) polypeptide L; 7.6kDa                                                                                                                                                                                                                                                                                                                                                                                                                             | -0.4894 | 0.0014 |
| 211733_x_at | SCP2     | sterol carrier protein 2                                                                                                                                                                                                                                                                                                                                                                                                                                                             | -0.4556 | 0.0012 |
| 211735_x_at | SFTPC    | surfactant; pulmonary-associated protein C                                                                                                                                                                                                                                                                                                                                                                                                                                           | -0.132  | 0.0397 |
| 211742_s_at | EVI2B    | ecotropic viral integration site 2B                                                                                                                                                                                                                                                                                                                                                                                                                                                  | -1.4289 | 0.0075 |
| 211745_x_at | HBA1     | hemoglobin; alpha 1                                                                                                                                                                                                                                                                                                                                                                                                                                                                  | -1.3329 | 0.0273 |
| 211748_x_at | PTGDS    | prostaglandin D2 synthase 21kDa (brain)                                                                                                                                                                                                                                                                                                                                                                                                                                              | -5.3206 | 0      |
| 211754_s_at | SLC25A17 | solute carrier family 25 (mitochondrial carrier; peroxisomal membrane protein; 34kDa); member 17                                                                                                                                                                                                                                                                                                                                                                                     | -0.6113 | 0.0053 |
| 211760_s_at | VAMP4    | vesicle-associated membrane protein 4                                                                                                                                                                                                                                                                                                                                                                                                                                                | -0.8002 | 0.0096 |
| 211764_s_at | UBE2D1   | ubiquitin-conjugating enzyme E2D 1 (UBC4/5 homolog; yeast)                                                                                                                                                                                                                                                                                                                                                                                                                           | -0.7678 | 0.005  |
| 211772_x_at | CHRNA3   | cholinergic receptor; nicotinic; alpha 3                                                                                                                                                                                                                                                                                                                                                                                                                                             | -0.2503 | 0.0096 |
| 211776_s_at | EPB41L3  | erythrocyte membrane protein band 4.1-like 3                                                                                                                                                                                                                                                                                                                                                                                                                                         | -1.8695 | 0.0015 |
| 211781_x_at |          |                                                                                                                                                                                                                                                                                                                                                                                                                                                                                      | -0.2228 | 0.0062 |
| 211784_s_at | SFRS1    | splicing factor; arginine/serine-rich 1 (splicing factor 2; alternate splicing factor)                                                                                                                                                                                                                                                                                                                                                                                               | -0.2677 | 0.0163 |
| 211787_s_at | EIF4A1   | eukaryotic translation initiation factor 4A; isoform 1                                                                                                                                                                                                                                                                                                                                                                                                                               | -0.2986 | 0.0033 |
| 211813_x_at | DCN      | decorin                                                                                                                                                                                                                                                                                                                                                                                                                                                                              | -3.9598 | 0.0004 |
| 211815_s_at | GGA3     | golgi associated; gamma adaptin ear containing; ARF binding protein 3                                                                                                                                                                                                                                                                                                                                                                                                                | -0.1561 | 0.0267 |
| 211817_s_at | KCNJ5    | potassium inwardly-rectifying channel; subfamily J; member 5                                                                                                                                                                                                                                                                                                                                                                                                                         | -0.9938 | 0.0006 |
| 211819_s_at | SORBS1   | sorbin and SH3 domain containing 1                                                                                                                                                                                                                                                                                                                                                                                                                                                   | -0.1731 | 0.001  |
| 211826_s_at | AFF1     | AF4/FMR2 family; member 1                                                                                                                                                                                                                                                                                                                                                                                                                                                            | -0.1022 | 0.0177 |
| 211835_at   | C12orf32 | chromosome 12 open reading frame 32, immunoglobulin heavy constant alpha 1, immunoglobulin heavy constant alpha 2 (A2m marker), immunoglobulin heavy constant delta, immunoglobulin heavy constant gamma 1 (G1m marker), immunoglobulin heavy constant gamma 3 (G3m marker), immunoglobulin heavy constant gamma 4 (G4m marker), immunoglobulin heavy constant mu, immunoglobulin heavy locus, immunoglobulin heavy variable 3-48, immunoglobulin heavy variable 4-31, interleukin 8 | -0.1011 | 0.0219 |
| 211839_s_at | CSF1     | colony stimulating factor 1 (macrophage)                                                                                                                                                                                                                                                                                                                                                                                                                                             | -0.2986 | 0.0001 |
| 211841_s_at | TNFRSF25 | tumor necrosis factor receptor superfamily; member 25                                                                                                                                                                                                                                                                                                                                                                                                                                | -0.268  | 0.0015 |

|             |          |                                                                                                       |         |        |
|-------------|----------|-------------------------------------------------------------------------------------------------------|---------|--------|
| 211845_at   | PVRL1    | poliovirus receptor-related 1 (herpesvirus entry mediator C)                                          | -0.3156 | 0.0005 |
| 211848_s_at | CEACAM7  | carcinoembryonic antigen-related cell adhesion molecule 7                                             | -0.1407 | 0.0092 |
| 211852_s_at | ATRN     | attractin                                                                                             | -0.9342 | 0.0022 |
| 211873_s_at | PCDHGA9  | protocadherin gamma subfamily A; 9                                                                    | -0.1149 | 0.0189 |
| 211885_x_at | FUT6     | fucosyltransferase 6 (alpha (1;3) fucosyltransferase)                                                 | -0.3005 | 0.0005 |
| 211886_s_at | TBX5     | T-box 5                                                                                               | -0.1458 | 0.0345 |
| 211896_s_at | DCN      | decorin                                                                                               | -4.0977 | 0.0003 |
| 211897_s_at | CRHR1    | corticotropin releasing hormone receptor 1                                                            | -0.1237 | 0.0011 |
| 211903_s_at | MPL      | myeloproliferative leukemia virus oncogene                                                            | -0.1899 | 0.0076 |
| 211922_s_at | CAT      | catalase                                                                                              | -2.0499 | 0      |
| 211941_s_at | PEBP1    | phosphatidylethanolamine binding protein 1                                                            | -0.4825 | 0.0013 |
| 211943_x_at | TPT1     | tumor protein; translationally-controlled 1                                                           | -0.1332 | 0.0017 |
| 211950_at   | UBR4     | ubiquitin protein ligase E3 component n-recognin 4                                                    | -0.5278 | 0.0214 |
| 211958_at   | IGFBP5   | insulin-like growth factor binding protein 5                                                          | -2.8957 | 0      |
| 211959_at   | IGFBP5   | insulin-like growth factor binding protein 5                                                          | -2.9215 | 0.0001 |
| 211975_at   | ZNF289   | zinc finger protein 289; ID1 regulated                                                                | -0.835  | 0.0063 |
| 211976_at   |          | CDNA: FLJ22515 fis; clone HRC12122; highly similar to AF052101 Homo sapiens clone 23872 mRNA sequence | -0.6473 | 0.0021 |
| 211986_at   | AHNAK    | AHNAK nucleoprotein                                                                                   | -1.1368 | 0.0058 |
| 211990_at   | HLA-DPA1 | major histocompatibility complex; class II; DP alpha 1                                                | -1.5358 | 0.0019 |
| 211991_s_at | HLA-DPA1 | major histocompatibility complex; class II; DP alpha 1                                                | -2.3026 | 0.003  |
| 211998_at   | H3F3B    | H3 histone; family 3B (H3.3B)                                                                         | -1.4987 | 0.0006 |
| 212010_s_at | CDV3     | CDV3 homolog (mouse)                                                                                  | -0.3399 | 0.0087 |
| 212024_x_at | FLII     | flightless I homolog (Drosophila)                                                                     | -0.315  | 0.0135 |
| 212026_s_at | EXOC7    | exocyst complex component 7                                                                           | -0.632  | 0.0165 |
| 212039_x_at | RPL3     | ribosomal protein L3                                                                                  | -0.1678 | 0.037  |
| 212040_at   | TGOLN2   | trans-golgi network protein 2                                                                         | -0.4581 | 0.0204 |
| 212043_at   | TGOLN2   | trans-golgi network protein 2                                                                         | -0.4051 | 0.0001 |
| 212044_s_at | RPL27A   | Ribosomal protein L27a                                                                                | -0.5818 | 0.0006 |
| 212055_at   | C18orf10 | chromosome 18 open reading frame 10                                                                   | -0.5319 | 0.0433 |
| 212063_at   | CD44     | CD44 molecule (Indian blood group)                                                                    | -1.8845 | 0.0048 |
| 212067_s_at | C1R      | complement component 1; r subcomponent                                                                | -1.6886 | 0.0073 |
| 212071_s_at | SPTBN1   | spectrin; beta; non-erythrocytic 1                                                                    | -0.865  | 0      |
| 212077_at   | CALD1    | caldesmon 1                                                                                           | -1.082  | 0.0004 |
| 212083_at   | TEX261   | testis expressed 261                                                                                  | -0.8862 | 0.0005 |

|             |         |                                                                            |         |        |
|-------------|---------|----------------------------------------------------------------------------|---------|--------|
| 212092_at   | PEG10   | paternally expressed 10                                                    | -2.3812 | 0.0198 |
| 212094_at   | PEG10   | paternally expressed 10                                                    | -1.5928 | 0.0109 |
| 212099_at   | RHOB    | ras homolog gene family; member B                                          | -0.6601 | 0.0036 |
| 212103_at   | KPNA6   | karyopherin alpha 6 (importin alpha 7)                                     | -0.3207 | 0.0429 |
| 212117_at   | RHOQ    | ras homolog gene family; member Q                                          | -0.5107 | 0.0366 |
| 212119_at   | RHOQ    | ras homolog gene family; member Q                                          | -0.7477 | 0.0063 |
| 212120_at   | RHOQ    | ras homolog gene family; member Q                                          | -0.7661 | 0.0011 |
| 212122_at   | RHOQ    | ras homolog gene family; member Q                                          | -0.9147 | 0.0007 |
| 212130_x_at | EIF1    | eukaryotic translation initiation factor 1                                 | -0.2185 | 0.005  |
| 212134_at   | PHLDB1  | pleckstrin homology-like domain; family B; member 1                        | -0.374  | 0.0399 |
| 212136_at   | ATP2B4  | ATPase; Ca <sup>++</sup> transporting; plasma membrane 4                   | -0.5396 | 0.0237 |
| 212146_at   | PLEKHM2 | pleckstrin homology domain containing; family M (with RUN domain) member 2 | -0.6854 | 0.0013 |
| 212148_at   | PBX1    | pre-B-cell leukemia homeobox 1                                             | -1.0845 | 0.0033 |
| 212151_at   | PBX1    | pre-B-cell leukemia homeobox 1                                             | -0.8588 | 0.0307 |
| 212168_at   | RBM12   | RNA binding motif protein 12                                               | -0.7721 | 0.0069 |
| 212169_at   | FKBP9   | FK506 binding protein 9; 63 kDa                                            | -0.4833 | 0.0449 |
| 212185_x_at | MT2A    | metallothionein 2A                                                         | -0.7562 | 0.0003 |
| 212186_at   | ACACA   | acetyl-Coenzyme A carboxylase alpha                                        | -0.5098 | 0.0359 |
| 212187_x_at | PTGDS   | prostaglandin D2 synthase 21kDa (brain)                                    | -5.0038 | 0      |
| 212188_at   | KCTD12  | potassium channel tetramerisation domain containing 12                     | -0.9977 | 0.0306 |
| 212192_at   | KCTD12  | potassium channel tetramerisation domain containing 12                     | -1.1888 | 0.0105 |
| 212195_at   | IL6ST   | Interleukin 6 signal transducer (gp130; oncostatin M receptor)             | -0.4684 | 0.0001 |
| 212196_at   | IL6ST   | Interleukin 6 signal transducer (gp130; oncostatin M receptor)             | -0.6666 | 0.0097 |
| 212197_x_at | M-RIP   | myosin phosphatase-Rho interacting protein                                 | -0.6415 | 0.0004 |
| 212203_x_at | IFITM3  | interferon induced transmembrane protein 3 (1-8U)                          | -0.6621 | 0.0032 |
| 212224_at   | ALDH1A1 | aldehyde dehydrogenase 1 family; member A1                                 | -3.7727 | 0.0002 |
| 212226_s_at | PPAP2B  | phosphatidic acid phosphatase type 2B                                      | -1.5279 | 0.0008 |
| 212227_x_at | EIF1    | eukaryotic translation initiation factor 1                                 | -0.2382 | 0.0031 |
| 212230_at   | PPAP2B  | phosphatidic acid phosphatase type 2B                                      | -1.6512 | 0.0001 |
| 212242_at   | TUBA4A  | tubulin; alpha 4a                                                          | -1.5448 | 0.0105 |
| 212245_at   | MCFD2   | multiple coagulation factor deficiency 2                                   | -0.3083 | 0.0045 |
| 212246_at   | MCFD2   | multiple coagulation factor deficiency 2                                   | -0.5651 | 0.0442 |
| 212260_at   | TNRC15  | trinucleotide repeat containing 15                                         | -0.5538 | 0.0342 |

|             |          |                                                                                |         |        |
|-------------|----------|--------------------------------------------------------------------------------|---------|--------|
| 212261_at   | TNRC15   | trinucleotide repeat containing 15                                             | -0.54   | 0.0159 |
| 212262_at   | QKI      | quaking homolog; KH domain RNA binding (mouse)                                 | -0.7453 | 0.014  |
| 212266_s_at | SFRS5    | splicing factor; arginine/serine-rich 5                                        | -0.3026 | 0.0219 |
| 212268_at   | SERPINB1 | serpin peptidase inhibitor; clade B (ovalbumin); member 1                      | -0.6704 | 0.0286 |
| 212270_x_at | C18orf32 | chromosome 18 open reading frame 32, hCG22804, hCG39912, ribosomal protein L17 | -0.2248 | 0.0072 |
| 212293_at   | HIPK1    | homeodomain interacting protein kinase 1                                       | -0.6937 | 0      |
| 212294_at   | GNG12    | guanine nucleotide binding protein (G protein); gamma 12                       | -0.7414 | 0.025  |
| 212313_at   | CHMP7    | CHMP family; member 7                                                          | -0.7529 | 0.0011 |
| 212319_at   | SGSM2    | small G protein signaling modulator 2                                          | -0.7427 | 0.0004 |
| 212325_at   | LIMCH1   | LIM and calponin homology domains 1                                            | -1.4934 | 0.0038 |
| 212326_at   | VPS13D   | vacuolar protein sorting 13 homolog D (S. cerevisiae)                          | -0.689  | 0.0004 |
| 212327_at   | LIMCH1   | LIM and calponin homology domains 1                                            | -2.2815 | 0.0004 |
| 212328_at   | LIMCH1   | LIM and calponin homology domains 1                                            | -1.9823 | 0.0005 |
| 212329_at   | SCAP     | SREBF chaperone                                                                | -1.0199 | 0.0228 |
| 212338_at   | MYO1D    | myosin ID                                                                      | -0.8022 | 0.0355 |
| 212345_s_at | CREB3L2  | cAMP responsive element binding protein 3-like 2                               | -0.5739 | 0.0182 |
| 212361_s_at | ATP2A2   | ATPase; Ca <sup>++</sup> transporting; cardiac muscle; slow twitch 2           | -1.6712 | 0      |
| 212386_at   | TCF4     | transcription factor 4                                                         | -0.6011 | 0.038  |
| 212393_at   | SBF1     | SET binding factor 1                                                           | -0.4539 | 0.0383 |
| 212394_at   | KIAA0090 | KIAA0090                                                                       | -0.414  | 0.0007 |
| 212397_at   | RDX      | radixin                                                                        | -0.8107 | 0      |
| 212398_at   | RDX      | radixin                                                                        | -0.9479 | 0.0132 |
| 212401_s_at | CDC2L2   | cell division cycle 2-like 2 (PITSLRE proteins)                                | -0.7609 | 0.0019 |
| 212405_s_at | KIAA0859 | KIAA0859                                                                       | -0.4826 | 0.0344 |
| 212408_at   | TOR1AIP1 | torsin A interacting protein 1                                                 | -0.5923 | 0.0017 |
| 212410_at   | EFHA1    | EF-hand domain family; member A1                                               | -0.5587 | 0.0024 |
| 212412_at   | PDLIM5   | PDZ and LIM domain 5                                                           | -0.6617 | 0.0013 |
| 212418_at   | ELF1     | E74-like factor 1 (ets domain transcription factor)                            | -0.8262 | 0.003  |
| 212419_at   | C10orf56 | chromosome 10 open reading frame 56                                            | -1.3639 | 0.0001 |
| 212420_at   | ELF1     | E74-like factor 1 (ets domain transcription factor)                            | -0.5809 | 0.0328 |
| 212421_at   | C22orf9  | chromosome 22 open reading frame 9                                             | -0.841  | 0.0007 |
| 212423_at   | C10orf56 | chromosome 10 open reading frame 56                                            | -0.9251 | 0.0005 |
| 212434_at   | GRPEL1   | GrpE-like 1; mitochondrial (E. coli)                                           | -0.4919 | 0.0187 |
| 212435_at   | TRIM33   | tripartite motif-containing 33                                                 | -0.3952 | 0.0079 |
| 212440_at   | RY1      | putative nucleic acid binding protein RY-1                                     | -0.2533 | 0.0427 |

|             |           |                                                                                |         |        |
|-------------|-----------|--------------------------------------------------------------------------------|---------|--------|
| 212448_at   | NEDD4L    | neural precursor cell expressed; developmentally down-regulated 4-like         | -1.158  | 0.0058 |
| 212450_at   | KIAA0256  | KIAA0256 gene product                                                          | -0.5016 | 0.0107 |
| 212459_x_at | SUCLG2    | succinate-CoA ligase; GDP-forming; beta subunit                                | -1.0134 | 0      |
| 212460_at   | C14orf147 | chromosome 14 open reading frame 147                                           | -0.7747 | 0.0156 |
| 212472_at   | MICAL2    | microtubule associated monooxygenase; calponin and LIM domain containing 2     | -1.084  | 0      |
| 212473_s_at | MICAL2    | microtubule associated monooxygenase; calponin and LIM domain containing 2     | -1.9271 | 0.0003 |
| 212480_at   | SPECC1L   | SPECC1-like                                                                    | -0.6347 | 0.0453 |
| 212490_at   | DNAJC8    | DnaJ (Hsp40) homolog; subfamily C; member 8                                    | -0.3777 | 0.0024 |
| 212494_at   | TENC1     | tensin like C1 domain containing phosphatase (tensin 2)                        | -1.0849 | 0.0206 |
| 212501_at   | CEBPB     | CCAAT/enhancer binding protein (C/EBP); beta                                   | -0.6527 | 0      |
| 212508_at   | MOAP1     | modulator of apoptosis 1                                                       | -0.8711 | 0.0003 |
| 212510_at   | GPD1L     | glycerol-3-phosphate dehydrogenase 1-like                                      | -0.8313 | 0.0012 |
| 212513_s_at | USP33     | ubiquitin specific peptidase 33                                                | -0.2948 | 0.0458 |
| 212516_at   | CENTD2    | centaurin; delta 2                                                             | -0.7565 | 0.0002 |
| 212526_at   | SPG20     | spastic paraplegia 20 (Troyer syndrome)                                        | -0.7914 | 0.0075 |
| 212527_at   | D15Wsu75e | DNA segment; Chr 15; Wayne State University 75; expressed                      | -1.2374 | 0.0017 |
| 212528_at   |           | CDNA clone IMAGE:3878236                                                       | -0.686  | 0.0264 |
| 212530_at   | NEK7      | NIMA (never in mitosis gene a)-related kinase 7                                | -0.6443 | 0.0002 |
| 212535_at   | MEF2A     | myocyte enhancer factor 2A                                                     | -0.3973 | 0.0158 |
| 212537_x_at | C18orf32  | chromosome 18 open reading frame 32, hCG22804, hCG39912, ribosomal protein L17 | -0.2474 | 0.0032 |
| 212538_at   | DOCK9     | dedicator of cytokinesis 9                                                     | -0.8493 | 0.0177 |
| 212549_at   | STAT5B    | signal transducer and activator of transcription 5B                            | -1.512  | 0      |
| 212550_at   | STAT5B    | signal transducer and activator of transcription 5B                            | -0.7895 | 0      |
| 212552_at   | HPCAL1    | hippocalcin-like 1                                                             | -0.7869 | 0.0337 |
| 212558_at   | SPRY1     | sprouty homolog 1; antagonist of FGF signaling (Drosophila)                    | -1.5959 | 0.0016 |
| 212578_x_at | RPS17     | ribosomal protein S17                                                          | -0.1284 | 0.0217 |
| 212588_at   | PTPRC     | protein tyrosine phosphatase; receptor type; C                                 | -1.2756 | 0.0485 |
| 212589_at   | RRAS2     | related RAS viral (r-ras) oncogene homolog 2                                   | -1.087  | 0.016  |
| 212590_at   | RRAS2     | related RAS viral (r-ras) oncogene homolog 2                                   | -0.9043 | 0.0153 |
| 212597_s_at | HMG2L1    | high-mobility group protein 2-like 1                                           | -0.6002 | 0.0101 |
| 212603_at   | MRPS31    | mitochondrial ribosomal protein S31                                            | -0.6243 | 0.0469 |
| 212604_at   | MRPS31    | mitochondrial ribosomal protein S31                                            | -0.663  | 0.0413 |



|             |          |                                                                                                                                                                                                                                |         |        |
|-------------|----------|--------------------------------------------------------------------------------------------------------------------------------------------------------------------------------------------------------------------------------|---------|--------|
| 212605_s_at |          | AF034176 Human mRNA (Tripodis and Ragoussis)<br>Homo sapiens cDNA clone ntcon5 contig                                                                                                                                          | -0.8804 | 0.0145 |
| 212607_at   | AKT3     | v-akt murine thymoma viral oncogene homolog 3<br>(protein kinase B; gamma)                                                                                                                                                     | -1.7609 | 0.0028 |
| 212609_s_at | AKT3     | V-akt murine thymoma viral oncogene homolog 3<br>(protein kinase B; gamma)                                                                                                                                                     | -2.0669 | 0      |
| 212627_s_at | EXOSC7   | exosome component 7                                                                                                                                                                                                            | -0.6299 | 0.0007 |
| 212636_at   | QKI      | quaking homolog; KH domain RNA binding (mouse)                                                                                                                                                                                 | -1.0672 | 0.0189 |
| 212643_at   | C14orf32 | chromosome 14 open reading frame 32                                                                                                                                                                                            | -0.2448 | 0.0491 |
| 212645_x_at | BRE      | brain and reproductive organ-expressed<br>(TNFRSF1A modulator)                                                                                                                                                                 | -1.6865 | 0      |
| 212646_at   | RFTN1    | raftlin; lipid raft linker 1                                                                                                                                                                                                   | -1.5527 | 0.001  |
| 212647_at   | RRAS     | related RAS viral (r-ras) oncogene homolog                                                                                                                                                                                     | -1.4073 | 0.0011 |
| 212653_s_at | EHBP1    | EH domain binding protein 1                                                                                                                                                                                                    | -0.9603 | 0.008  |
| 212665_at   | TIPARP   | TCDD-inducible poly(ADP-ribose) polymerase                                                                                                                                                                                     | -4.0215 | 0      |
| 212671_s_at | HLA-DQA1 | major histocompatibility complex; class II; DQ alpha<br>1, major histocompatibility complex; class II; DQ<br>alpha 2, similar to HLA class II histocompatibility<br>antigen; DQ(1) alpha chain precursor (DC-4 alpha<br>chain) | -2.9832 | 0.0031 |
| 212681_at   | EPB41L3  | erythrocyte membrane protein band 4.1-like 3                                                                                                                                                                                   | -1.8964 | 0.0002 |
| 212687_at   | LIMS1    | LIM and senescent cell antigen-like domains 1                                                                                                                                                                                  | -0.8951 | 0      |
| 212693_at   | MDN1     | MDN1; midasin homolog (yeast)                                                                                                                                                                                                  | -0.9676 | 0.001  |
| 212694_s_at | PCCB     | propionyl Coenzyme A carboxylase; beta<br>polypeptide                                                                                                                                                                          | -0.9965 | 0.0001 |
| 212695_at   | CRY2     | cryptochrome 2 (photolyase-like)                                                                                                                                                                                               | -1.3486 | 0.0001 |
| 212701_at   |          | Clone 23962 mRNA sequence                                                                                                                                                                                                      | -0.3815 | 0.0491 |
| 212703_at   | TLN2     | talin 2                                                                                                                                                                                                                        | -0.4655 | 0.0015 |
| 212704_at   | ZCCHC11  | zinc finger; CCHC domain containing 11                                                                                                                                                                                         | -0.5789 | 0.0307 |
| 212705_x_at | PNPLA2   | patatin-like phospholipase domain containing 2                                                                                                                                                                                 | -0.3398 | 0.0384 |
| 212707_s_at | FLJ21767 | RAS p21 protein activator 4, hypothetical protein<br>FLJ21767                                                                                                                                                                  | -0.3988 | 0.0151 |
| 212713_at   | MFAP4    | microfibrillar-associated protein 4                                                                                                                                                                                            | -1.0327 | 0.0035 |
| 212717_at   | PLEKHM1  | pleckstrin homology domain containing; family M<br>(with RUN domain) member 1                                                                                                                                                  | -0.5814 | 0.0072 |
| 212719_at   | PHLPP    | PH domain and leucine rich repeat protein<br>phosphatase                                                                                                                                                                       | -1.4423 | 0.0006 |
| 212724_at   | RND3     | Rho family GTPase 3                                                                                                                                                                                                            | -1.1391 | 0.0189 |
| 212731_at   | ANKRD46  | ankyrin repeat domain 46                                                                                                                                                                                                       | -1.0071 | 0.0017 |
| 212740_at   | PIK3R4   | phosphoinositide-3-kinase; regulatory subunit 4;<br>p150                                                                                                                                                                       | -0.4488 | 0.0078 |
| 212747_at   | ANKS1A   | ankyrin repeat and sterile alpha motif domain<br>containing 1A                                                                                                                                                                 | -1.7921 | 0      |

|             |              |                                                                               |         |        |
|-------------|--------------|-------------------------------------------------------------------------------|---------|--------|
| 212753_at   | PCGF3        | polycomb group ring finger 3                                                  | -0.7316 | 0.001  |
| 212760_at   | UBR2         | ubiquitin protein ligase E3 component n-recognin 2                            | -0.7075 | 0.0017 |
| 212787_at   | YLPM1        | YLP motif containing 1                                                        | -0.5958 | 0.0062 |
| 212793_at   | DAAM2        | dishevelled associated activator of morphogenesis 2                           | -2.8119 | 0.0009 |
| 212810_s_at | SLC1A4       | solute carrier family 1 (glutamate/neutral amino acid transporter); member 4  | -1.7868 | 0.0004 |
| 212811_x_at | SLC1A4       | solute carrier family 1 (glutamate/neutral amino acid transporter); member 4  | -1.5236 | 0.0019 |
| 212813_at   | JAM3         | junctional adhesion molecule 3                                                | -1.3751 | 0.0044 |
| 212817_at   | DNAJB5       | DnaJ (Hsp40) homolog; subfamily B; member 5                                   | -0.4295 | 0.0334 |
| 212823_s_at | PLEKHG3      | pleckstrin homology domain containing; family G (with RhoGef domain) member 3 | -0.2606 | 0.0418 |
| 212829_at   | PIP4K2A      | phosphatidylinositol-5-phosphate 4-kinase; type II; alpha                     | -0.9898 | 0.0116 |
| 212841_s_at | PPFIBP2      | PTPRF interacting protein; binding protein 2 (liprin beta 2)                  | -1.1405 | 0.0106 |
| 212845_at   | SAMD4A       | sterile alpha motif domain containing 4A                                      | -0.8893 | 0.0247 |
| 212848_s_at | C9orf3       | chromosome 9 open reading frame 3                                             | -1.5956 | 0      |
| 212856_at   | DIP          | death-inducing-protein                                                        | -3.3266 | 0      |
| 212859_x_at | MT1E         | metallothionein 1E                                                            | -1.0716 | 0.0032 |
| 212873_at   | HMHA1        | histocompatibility (minor) HA-1                                               | -0.7792 | 0.0137 |
| 212874_at   | APOE         | Apolipoprotein E                                                              | -0.1934 | 0.0023 |
| 212880_at   | WDR7         | WD repeat domain 7                                                            | -0.5999 | 0.0012 |
| 212883_at   | APOE         | Apolipoprotein E                                                              | -0.4592 | 0.0001 |
| 212884_x_at | APOE         | Apolipoprotein E                                                              | -0.8054 | 0.0073 |
| 212890_at   | MGC15523     | hypothetical protein MGC15523                                                 | -0.9055 | 0.0034 |
| 212908_at   | DNAJC16      | DnaJ (Hsp40) homolog; subfamily C; member 16                                  | -0.7702 | 0.0297 |
| 212911_at   | DNAJC16      | DnaJ (Hsp40) homolog; subfamily C; member 16                                  | -1.3909 | 0.0001 |
| 212912_at   | RPS6KA2      | ribosomal protein S6 kinase; 90kDa; polypeptide 2                             | -1.5365 | 0.008  |
| 212914_at   | CBX7         | chromobox homolog 7                                                           | -1.1053 | 0.0001 |
| 212915_at   | PDZRN3       | PDZ domain containing RING finger 3                                           | -3.4462 | 0      |
| 212923_s_at | C6orf145     | chromosome 6 open reading frame 145                                           | -0.9287 | 0.0012 |
| 212928_at   | TSPYL4       | TSPYL-like 4                                                                  | -1.022  | 0      |
| 212933_x_at | RPL13        | ribosomal protein L13                                                         | -0.1159 | 0.048  |
| 212939_at   | COL6A1       | collagen; type VI; alpha 1                                                    | -0.1626 | 0.0003 |
| 212946_at   | RP11-125A7.3 | KIAA0564 protein                                                              | -1.2333 | 0.0004 |
| 212947_at   | SLC9A8       | solute carrier family 9 (sodium/hydrogen exchanger); member 8                 | -0.6343 | 0.0013 |
| 212950_at   | GPR116       | G protein-coupled receptor 116                                                | -1.9415 | 0      |
| 212951_at   | GPR116       | G protein-coupled receptor 116                                                | -1.7063 | 0.0001 |

|             |           |                                                                                                |         |        |
|-------------|-----------|------------------------------------------------------------------------------------------------|---------|--------|
| 212952_at   |           | Transcribed locus                                                                              | -0.6582 | 0.0011 |
| 212961_x_at | CXorf40B  | chromosome X open reading frame 40B                                                            | -1.8444 | 0      |
| 212963_at   | TM2D1     | TM2 domain containing 1                                                                        | -0.2017 | 0.0209 |
| 212969_x_at | EML3      | echinoderm microtubule associated protein like 3                                               | -0.516  | 0.0061 |
| 212970_at   |           | Full-length cDNA clone CS0DC015YK09 of Neuroblastoma Cot 25-normalized of Homo sapiens (human) | -0.6059 | 0.043  |
| 212973_at   | RPIA      | ribose 5-phosphate isomerase A (ribose 5-phosphate epimerase)                                  | -0.4733 | 0.0458 |
| 212974_at   | DENND3    | DENN/MADD domain containing 3                                                                  | -0.2487 | 0.0096 |
| 212975_at   | DENND3    | DENN/MADD domain containing 3                                                                  | -0.5713 | 0.0001 |
| 212976_at   |           |                                                                                                | -0.8256 | 0.0018 |
| 212978_at   | LRRC8B    | Leucine rich repeat containing 8 family; member B                                              | -2.2097 | 0      |
| 212987_at   | FBXO9     | F-box protein 9                                                                                | -0.8615 | 0      |
| 212989_at   | SGMS1     | sphingomyelin synthase 1                                                                       | -1.2209 | 0      |
| 212991_at   | FBXO9     | F-box protein 9                                                                                | -1.1616 | 0.0017 |
| 212993_at   |           | MRNA; cDNA DKFZp667B1718 (from clone DKFZp667B1718)                                            | -0.8325 | 0.0163 |
| 212998_x_at | HLA-DQB1  | major histocompatibility complex; class II; DQ beta 1                                          | -2.4294 | 0.0081 |
| 213003_s_at | CEBPD     | CCAAT/enhancer binding protein (C/EBP); delta                                                  | -0.3454 | 0      |
| 213005_s_at | ANKRD15   | ankyrin repeat domain 15                                                                       | -1.1675 | 0.0091 |
| 213006_at   | CEBPD     | CCAAT/enhancer binding protein (C/EBP); delta                                                  | -1.8387 | 0.0001 |
| 213010_at   | PRKCDBP   | protein kinase C; delta binding protein                                                        | -0.7675 | 0.0194 |
| 213019_at   | RANBP6    | RAN binding protein 6                                                                          | -0.3738 | 0.0123 |
| 213020_at   | GOSR1     | golgi SNAP receptor complex member 1                                                           | -0.546  | 0.0087 |
| 213029_at   | NFIB      | nuclear factor I/B                                                                             | -0.6873 | 0.0158 |
| 213034_at   | KIAA0999  | KIAA0999 protein                                                                               | -0.7129 | 0.0127 |
| 213038_at   | RNF19B    | ring finger protein 19B                                                                        | -1.5823 | 0      |
| 213041_s_at | ATP5D     | ATP synthase; H <sup>+</sup> transporting; mitochondrial F1 complex; delta subunit             | -0.2813 | 0.0458 |
| 213056_at   | FRMD4B    | FERM domain containing 4B                                                                      | -1.638  | 0.0003 |
| 213058_at   | TTC28     | tetratricopeptide repeat domain 28                                                             | -0.9675 | 0.0055 |
| 213059_at   | CREB3L1   | cAMP responsive element binding protein 3-like 1                                               | -0.9316 | 0.0394 |
| 213068_at   | DPT       | dermatopontin                                                                                  | -2.6413 | 0      |
| 213070_at   | PIK3C2A   | phosphoinositide-3-kinase; class 2; alpha polypeptide                                          | -0.4228 | 0.0114 |
| 213071_at   | DPT       | dermatopontin                                                                                  | -1.8037 | 0      |
| 213080_x_at | RPL5      | ribosomal protein L5                                                                           | -0.2978 | 0      |
| 213084_x_at | hCG_16001 | ribosomal protein L23a, similar to ribosomal protein L23A                                      | -0.1452 | 0.0035 |
| 213087_s_at |           | CDNA clone IMAGE:4838699                                                                       | -0.1448 | 0.0353 |
| 213093_at   | PRKCA     | protein kinase C; alpha                                                                        | -2.2868 | 0.0019 |

|             |           |                                                                                                                  |         |        |
|-------------|-----------|------------------------------------------------------------------------------------------------------------------|---------|--------|
| 213094_at   | GPR126    | G protein-coupled receptor 126                                                                                   | -1.2716 | 0      |
| 213095_x_at | AIF1      | allograft inflammatory factor 1                                                                                  | -2.3329 | 0      |
| 213102_at   | ACTR3     | ARP3 actin-related protein 3 homolog (yeast)                                                                     | -0.4565 | 0.0021 |
| 213103_at   | STARD13   | StAR-related lipid transfer (START) domain containing 13                                                         | -1.046  | 0.0119 |
| 213106_at   |           |                                                                                                                  | -1.7064 | 0.0003 |
| 213111_at   | PIP5K3    | phosphatidylinositol-3-phosphate/phosphatidylinositol 5-kinase; type III                                         | -0.4254 | 0.0441 |
| 213132_s_at | MCAT      | malonyl CoA:ACP acyltransferase (mitochondrial)                                                                  | -0.5795 | 0.0302 |
| 213146_at   | JMJD3     | jumonji domain containing 3                                                                                      | -0.823  | 0.0115 |
| 213158_at   |           | Homo sapiens; clone IMAGE:4214654; mRNA                                                                          | -0.8726 | 0.0168 |
| 213160_at   | DOCK2     | dedicator of cytokinesis 2                                                                                       | -0.8914 | 0.034  |
| 213179_at   | RQCD1     | RCD1 required for cell differentiation1 homolog (S. pombe)                                                       | -0.6234 | 0.0351 |
| 213181_s_at | MOCS1     | molybdenum cofactor synthesis 1                                                                                  | -0.8004 | 0.0405 |
| 213182_x_at | CDKN1C    | cyclin-dependent kinase inhibitor 1C (p57; Kip2)                                                                 | -3.385  | 0      |
| 213183_s_at | CDKN1C    | Cyclin-dependent kinase inhibitor 1C (p57; Kip2)                                                                 | -2.9501 | 0      |
| 213195_at   | LOC201229 | hypothetical protein LOC201229                                                                                   | -1.3554 | 0      |
| 213220_at   | LOC92482  | hypothetical protein LOC92482                                                                                    | -0.3771 | 0.028  |
| 213221_s_at |           |                                                                                                                  | -1.6631 | 0      |
| 213236_at   | SASH1     | SAM and SH3 domain containing 1                                                                                  | -0.5039 | 0.0441 |
| 213247_at   | SVEP1     | sushi; von Willebrand factor type A; EGF and pentraxin domain containing 1                                       | -2.4628 | 0      |
| 213252_at   | SH3PXD2A  | SH3 and PX domains 2A                                                                                            | -0.229  | 0.0055 |
| 213260_at   | FOXC1     | forkhead box C1                                                                                                  | -0.5108 | 0.0141 |
| 213263_s_at | PCBP2     | poly(rC) binding protein 2                                                                                       | -0.7139 | 0.0073 |
| 213264_at   | PCBP2     | poly(rC) binding protein 2                                                                                       | -0.7221 | 0.0053 |
| 213265_at   | PGA3      | pepsinogen 3; group I (pepsinogen A), pepsinogen 4; group I (pepsinogen A), pepsinogen 5; group I (pepsinogen A) | -0.3348 | 0.001  |
| 213271_s_at | DOPEY1    | dopey family member 1                                                                                            | -0.3826 | 0.025  |
| 213273_at   | ODZ4      | odz; odd Oz/ten-m homolog 4 (Drosophila)                                                                         | -0.5995 | 0.0356 |
| 213279_at   | DHRS1     | dehydrogenase/reductase (SDR family) member 1                                                                    | -1.6049 | 0      |
| 213290_at   | COL6A2    | collagen; type VI; alpha 2                                                                                       | -0.7719 | 0.0005 |
| 213293_s_at | TRIM22    | tripartite motif-containing 22                                                                                   | -2.0877 | 0.001  |
| 213296_at   | RER1      | RER1 retention in endoplasmic reticulum 1 homolog (S. cerevisiae)                                                | -1.1403 | 0      |
| 213306_at   | MPDZ      | multiple PDZ domain protein                                                                                      | -1.2956 | 0.0026 |
| 213315_x_at | CXorf40A  | chromosome X open reading frame 40A                                                                              | -1.8197 | 0      |
| 213316_at   | KIAA1462  | KIAA1462                                                                                                         | -0.8787 | 0.0396 |
| 213317_at   | CLIC5     | chloride intracellular channel 5                                                                                 | -0.6481 | 0.0192 |

|             |           |                                                                                                |         |        |
|-------------|-----------|------------------------------------------------------------------------------------------------|---------|--------|
| 213318_s_at | BAT3      | HLA-B associated transcript 3                                                                  | -0.3066 | 0.041  |
| 213321_at   | BCKDHB    | branched chain keto acid dehydrogenase E1; beta polypeptide (maple syrup urine disease)        | -0.375  | 0.0045 |
| 213323_s_at | ZC3H7B    | zinc finger CCCH-type containing 7B                                                            | -0.3427 | 0.0008 |
| 213324_at   | SRC       | v-src sarcoma (Schmidt-Ruppin A-2) viral oncogene homolog (avian)                              | -0.8216 | 0.0127 |
| 213327_s_at | USP12     | ubiquitin specific peptidase 12                                                                | -0.5155 | 0.0079 |
| 213331_s_at | NEK1      | NIMA (never in mitosis gene a)-related kinase 1                                                | -0.6714 | 0.0388 |
| 213344_s_at | H2AFX     | H2A histone family; member X                                                                   | -0.2455 | 0.0124 |
| 213348_at   | CDKN1C    | cyclin-dependent kinase inhibitor 1C (p57; Kip2)                                               | -3.7474 | 0      |
| 213350_at   | RPS11     | Ribosomal protein S11                                                                          | -0.5498 | 0.0008 |
| 213355_at   | ST3GAL6   | ST3 beta-galactoside alpha-2,3-sialyltransferase 6                                             | -1.5434 | 0.0014 |
| 213357_at   | GTF2H5    | general transcription factor IIH; polypeptide 5                                                | -0.6433 | 0.0001 |
| 213366_x_at | ATP5C1    | ATP synthase; H+ transporting; mitochondrial F1 complex; gamma polypeptide 1                   | -0.2512 | 0.014  |
| 213374_x_at | HIBCH     | 3-hydroxyisobutyryl-Coenzyme A hydrolase                                                       | -1.7348 | 0      |
| 213375_s_at | CG018     | hypothetical gene CG018                                                                        | -1.0593 | 0.0064 |
| 213379_at   | COQ2      | coenzyme Q2 homolog; prenyltransferase (yeast)                                                 | -0.9064 | 0.0005 |
| 213381_at   | C10orf72  | Chromosome 10 open reading frame 72                                                            | -1.2673 | 0.0198 |
| 213382_at   | MST1      | macrophage stimulating 1 (hepatocyte growth factor-like), macrophage stimulating; pseudogene 9 | -0.1054 | 0.047  |
| 213383_at   |           | Full-length cDNA clone CS0DF026YC16 of Fetal brain of Homo sapiens (human)                     | -0.2287 | 0.0279 |
| 213398_s_at | C14orf124 | chromosome 14 open reading frame 124                                                           | -0.5968 | 0.0021 |
| 213403_at   |           | Clone 23908 mRNA sequence                                                                      | -0.1614 | 0.0331 |
| 213411_at   |           | MRNA; cDNA DKFZp434E0528 (from clone DKFZp434E0528)                                            | -1.5977 | 0.0007 |
| 213413_at   | STON1     | stonin 1                                                                                       | -2.7396 | 0      |
| 213418_at   | HSPA6     | heat shock 70kDa protein 6 (HSP70B')                                                           | -1.1733 | 0.0437 |
| 213421_x_at | PRSS3     | protease; serine; 3 (mesotrypsin)                                                              | -0.1537 | 0.0317 |
| 213422_s_at | LOC727882 | matrix-remodelling associated 8, similar to matrix-remodelling associated 8                    | -1.1693 | 0.0042 |
| 213429_at   | BICC1     | bicaudal C homolog 1 (Drosophila)                                                              | -1.9895 | 0.0001 |
| 213450_s_at | ICOSLG    | inducible T-cell co-stimulator ligand                                                          | -0.5222 | 0      |
| 213469_at   | PGAP1     | GPI deacylase                                                                                  | -3.0419 | 0      |
| 213489_at   | MAPRE2    | Microtubule-associated protein; RP/EB family; member 2                                         | -0.683  | 0.041  |
| 213497_at   | ABTB2     | ankyrin repeat and BTB (POZ) domain containing 2                                               | -3.9806 | 0      |
| 213500_at   |           | Clone 24627 mRNA sequence                                                                      | -1.4364 | 0.0001 |

|             |               |                                                                             |         |        |
|-------------|---------------|-----------------------------------------------------------------------------|---------|--------|
| 213508_at   | C14orf147     | chromosome 14 open reading frame 147                                        | -1.3452 | 0.0005 |
| 213519_s_at | LAMA2         | laminin; alpha 2 (merosin; congenital muscular dystrophy)                   | -2.6441 | 0.0002 |
| 213521_at   | PTPN18        | protein tyrosine phosphatase; non-receptor type 18 (brain-derived)          | -0.5009 | 0.0387 |
| 213524_s_at | G0S2          | G0/G1switch 2                                                               | -2.4084 | 0.0056 |
| 213537_at   | HLA-DPA1      | major histocompatibility complex; class II; DP alpha 1                      | -2.6073 | 0.0006 |
| 213540_at   | HSD17B8       | hydroxysteroid (17-beta) dehydrogenase 8                                    | -1.6954 | 0      |
| 213547_at   | CAND2         | cullin-associated and neddylation-dissociated 2 (putative)                  | -0.8205 | 0.0134 |
| 213550_s_at | TMCO6         | transmembrane and coiled-coil domains 6                                     | -0.3002 | 0.0193 |
| 213551_x_at | PCGF2         | polycomb group ring finger 2                                                | -0.3948 | 0.0468 |
| 213553_x_at | APOC1         | apolipoprotein C-I                                                          | -1.9441 | 0.0005 |
| 213554_s_at | CDV3          | CDV3 homolog (mouse)                                                        | -0.6463 | 0.0213 |
| 213560_at   | GADD45B       | Growth arrest and DNA-damage-inducible; beta                                | -0.2584 | 0.0023 |
| 213563_s_at | TUBGCP2       | Tubulin; gamma complex associated protein 2                                 | -0.4328 | 0      |
| 213566_at   | RNASE6        | ribonuclease; RNase A family; k6                                            | -2.6582 | 0.0001 |
| 213572_s_at | SERPINB1      | serpin peptidase inhibitor; clade B (ovalbumin); member 1                   | -1.0509 | 0.0004 |
| 213581_at   | PDCD2         | programmed cell death 2                                                     | -0.732  | 0.0103 |
| 213582_at   | ATP11A        | ATPase; Class VI; type 11A                                                  | -0.329  | 0.015  |
| 213588_x_at | RPL14         | ribosomal protein L14                                                       | -0.2109 | 0.0146 |
| 213591_at   | ALDH7A1       | aldehyde dehydrogenase 7 family; member A1                                  | -0.5565 | 0.001  |
| 213604_at   | TCEB3         | transcription elongation factor B (SIII); polypeptide 3 (110kDa; elongin A) | -0.3828 | 0.0166 |
| 213624_at   | SMPDL3A       | sphingomyelin phosphodiesterase; acid-like 3A                               | -1.0285 | 0.002  |
| 213628_at   | CLCC1         | chloride channel CLIC-like 1                                                | -0.3606 | 0.0324 |
| 213629_x_at | MT1F          | metallothionein 1F                                                          | -1.4739 | 0.0057 |
| 213636_at   | KIAA1045      | KIAA1045                                                                    | -0.1087 | 0.0424 |
| 213648_at   | EXOSC7        | exosome component 7                                                         | -0.6378 | 0.0068 |
| 213661_at   | DKFZP586H2123 | regeneration associated muscle protease                                     | -1.2533 | 0.0001 |
| 213673_x_at | NENF          | Neuron derived neurotrophic factor                                          | -0.2017 | 0.0111 |
| 213674_x_at | IGHD          | immunoglobulin heavy constant delta                                         | -0.1015 | 0.0454 |
| 213675_at   |               | CDNA FLJ25106 fis; clone CBR01467                                           | -1.6679 | 0      |
| 213687_s_at | RPL35A        | ribosomal protein L35a                                                      | -0.3945 | 0.0015 |
| 213695_at   | PON3          | paraoxonase 3                                                               | -1.4617 | 0.0002 |
| 213705_at   |               | CDNA FLJ30007 fis; clone 3NB692000012                                       | -0.5394 | 0.0024 |
| 213706_at   | GPD1          | glycerol-3-phosphate dehydrogenase 1 (soluble)                              | -0.5865 | 0.0005 |
| 213711_at   | KRT81         | keratin 81                                                                  | -0.1899 | 0.0364 |
| 213715_s_at | ANKRD47       | ankyrin repeat domain 47                                                    | -0.3626 | 0.0043 |

|             |           |                                                                                                                                                                                                                                                                                             |         |        |
|-------------|-----------|---------------------------------------------------------------------------------------------------------------------------------------------------------------------------------------------------------------------------------------------------------------------------------------------|---------|--------|
| 213724_s_at | PDK2      | pyruvate dehydrogenase kinase; isozyme 2                                                                                                                                                                                                                                                    | -1.1549 | 0      |
| 213732_at   | TCF3      | Transcription factor 3 (E2A immunoglobulin enhancer binding factors E12/E47)                                                                                                                                                                                                                | -0.1131 | 0.016  |
| 213733_at   | MYO1F     | myosin IF                                                                                                                                                                                                                                                                                   | -1.1703 | 0.0028 |
| 213738_s_at | ATP5A1    | ATP synthase; H+ transporting; mitochondrial F1 complex; alpha subunit 1; cardiac muscle                                                                                                                                                                                                    | -0.1911 | 0.01   |
| 213744_at   | ATRNL1    | attractin-like 1                                                                                                                                                                                                                                                                            | -1.6434 | 0      |
| 213755_s_at | SKI       | V-ski sarcoma viral oncogene homolog (avian)                                                                                                                                                                                                                                                | -0.1417 | 0.0288 |
| 213764_s_at | MFAP5     | microfibrillar associated protein 5                                                                                                                                                                                                                                                         | -2.3357 | 0      |
| 213765_at   | MFAP5     | microfibrillar associated protein 5                                                                                                                                                                                                                                                         | -1.8968 | 0      |
| 213768_s_at | ASCL1     | achaete-scute complex homolog 1 (Drosophila)                                                                                                                                                                                                                                                | -0.2177 | 0.0054 |
| 213769_at   | KSR1      | kinase suppressor of ras 1                                                                                                                                                                                                                                                                  | -0.2226 | 0.0092 |
| 213774_s_at |           |                                                                                                                                                                                                                                                                                             | -0.1295 | 0.0078 |
| 213777_s_at |           |                                                                                                                                                                                                                                                                                             | -0.1086 | 0.0412 |
| 213789_at   | TBC1D25   | TBC1 domain family; member 25                                                                                                                                                                                                                                                               | -0.9056 | 0.0338 |
| 213791_at   | PENK      | proenkephalin                                                                                                                                                                                                                                                                               | -2.7119 | 0      |
| 213800_at   | CFH       | complement factor H                                                                                                                                                                                                                                                                         | -2.7997 | 0      |
| 213801_x_at | LOC387867 | ribosomal protein SA, ribosomal protein SA pseudogene, similar to 40S ribosomal protein SA (p40) (34/67 kDa laminin receptor) (Colon carcinoma laminin-binding protein) (NEM/1CHD4) (Multidrug resistance-associated protein MGR1-Ag), similar to laminin receptor 1 (ribosomal protein SA) | -0.2218 | 0.0227 |
| 213806_at   | PURA      | Purine-rich element binding protein A                                                                                                                                                                                                                                                       | -0.103  | 0.0486 |
| 213813_x_at |           |                                                                                                                                                                                                                                                                                             | -0.3617 | 0.0054 |
| 213817_at   |           | CDNA FLJ13601 fis; clone PLACE1010069                                                                                                                                                                                                                                                       | -2.0997 | 0      |
| 213819_s_at | FLOT1     | Flotillin 1                                                                                                                                                                                                                                                                                 | -0.1336 | 0.0011 |
| 213824_at   | OLIG2     | oligodendrocyte lineage transcription factor 2                                                                                                                                                                                                                                              | -0.1713 | 0.0013 |
| 213826_s_at |           |                                                                                                                                                                                                                                                                                             | -0.3674 | 0.0017 |
| 213844_at   | HOXA5     | homeobox A5                                                                                                                                                                                                                                                                                 | -3.8358 | 0      |
| 213847_at   | PRPH      | peripherin                                                                                                                                                                                                                                                                                  | -0.2524 | 0.0047 |
| 213848_at   |           | MRNA; cDNA DKFZp586F2224 (from clone DKFZp586F2224)                                                                                                                                                                                                                                         | -0.6775 | 0.0015 |
| 213852_at   | RBM8A     | RNA binding motif protein 8A                                                                                                                                                                                                                                                                | -0.6521 | 0.0093 |
| 213854_at   | SYNGR1    | synaptogyrin 1                                                                                                                                                                                                                                                                              | -0.3507 | 0.0049 |
| 213862_at   | PNPLA2    | Patatin-like phospholipase domain containing 2                                                                                                                                                                                                                                              | -0.1677 | 0.0195 |
| 213871_s_at | C6orf108  | Chromosome 6 open reading frame 108                                                                                                                                                                                                                                                         | -0.2398 | 0.0038 |
| 213883_s_at | TM2D1     | TM2 domain containing 1                                                                                                                                                                                                                                                                     | -0.4477 | 0.0027 |
| 213884_s_at | TRIM3     | tripartite motif-containing 3                                                                                                                                                                                                                                                               | -0.2163 | 0.0026 |
| 213891_s_at | TCF4      | transcription factor 4                                                                                                                                                                                                                                                                      | -0.735  | 0.035  |

|             |           |                                                                                                 |         |        |
|-------------|-----------|-------------------------------------------------------------------------------------------------|---------|--------|
| 213895_at   | EMP1      | epithelial membrane protein 1                                                                   | -0.4065 | 0.0064 |
| 213897_s_at | MRPL23    | mitochondrial ribosomal protein L23                                                             | -1.1041 | 0.001  |
| 213900_at   | C9orf61   | chromosome 9 open reading frame 61                                                              | -0.9422 | 0.0092 |
| 213904_at   |           | Clone 23555 mRNA sequence                                                                       | -2.0262 | 0.0026 |
| 213905_x_at | BGN       | biglycan                                                                                        | -1.1597 | 0.0148 |
| 213907_at   | EEF1E1    | Eukaryotic translation elongation factor 1 epsilon 1                                            | -0.2326 | 0.0014 |
| 213914_s_at | SPTBN1    | Spectrin; beta; non-erythrocytic 1                                                              | -0.2014 | 0.0007 |
| 213921_at   | SST       | somatostatin                                                                                    | -1.1908 | 0.0001 |
| 213923_at   | RAP2B     | RAP2B; member of RAS oncogene family                                                            | -0.7919 | 0.0223 |
| 213933_at   | PTGER3    | prostaglandin E receptor 3 (subtype EP3)                                                        | -2.019  | 0.0001 |
| 213935_at   | ABHD5     | abhydrolase domain containing 5                                                                 | -0.4932 | 0.0081 |
| 213942_at   | MEGF6     | multiple EGF-like-domains 6                                                                     | -0.2322 | 0.0001 |
| 213948_x_at | CADM3     | cell adhesion molecule 3                                                                        | -0.1365 | 0.0357 |
| 213952_s_at | ALOX5     | Arachidonate 5-lipoxygenase                                                                     | -0.1322 | 0.0056 |
| 213960_at   |           | CDNA FLJ37610 fis; clone BRCOC2011398                                                           | -0.5474 | 0      |
| 213961_s_at |           |                                                                                                 | -0.151  | 0.0095 |
| 213967_at   | RALYL     | RALY RNA binding protein-like                                                                   | -3.784  | 0.0001 |
| 213969_x_at | RPL29     | ribosomal protein L29                                                                           | -0.2096 | 0.0016 |
| 213970_at   | LOC653256 | RAB; member of RAS oncogene family-like 3, similar to RAB; member of RAS oncogene family-like 3 | -1.5724 | 0.0001 |
| 213974_at   | ADAMTSL3  | ADAMTS-like 3                                                                                   | -2.2369 | 0      |
| 213982_s_at | RABGAP1L  | RAB GTPase activating protein 1-like                                                            | -1.3595 | 0.0013 |
| 213987_s_at | CDC2L5    | cell division cycle 2-like 5 (cholinesterase-related cell division controller)                  | -0.1277 | 0.0496 |
| 213988_s_at | SAT1      | spermidine/spermine N1-acetyltransferase 1                                                      | -0.9678 | 0.0002 |
| 213991_s_at | HS3ST1    | Heparan sulfate (glucosamine) 3-O-sulfotransferase 1                                            | -0.1498 | 0.0179 |
| 213993_at   | SPON1     | spondin 1; extracellular matrix protein                                                         | -2.0441 | 0      |
| 213994_s_at | SPON1     | spondin 1; extracellular matrix protein                                                         | -3.3632 | 0      |
| 213999_at   | YIPF4     | Yip1 domain family; member 4                                                                    | -0.142  | 0.0129 |
| 214001_x_at |           | CDNA: FLJ21700 fis; clone COL09849; highly similar to HSU14972 Human ribosomal protein S10 mRNA | -0.2695 | 0.0056 |
| 214005_at   | GGCX      | gamma-glutamyl carboxylase                                                                      | -0.7025 | 0.0193 |
| 214012_at   | ARTS-1    | type 1 tumor necrosis factor receptor shedding aminopeptidase regulator                         | -1.1856 | 0.0127 |
| 214014_at   | CDC42EP2  | CDC42 effector protein (Rho GTPase binding) 2                                                   | -0.2878 | 0.0001 |
| 214022_s_at | IFITM1    | interferon induced transmembrane protein 1 (9-27)                                               | -1.1963 | 0.0055 |



|             |               |                                                                                                                                                                                                                                                                                                                                                                                |         |        |
|-------------|---------------|--------------------------------------------------------------------------------------------------------------------------------------------------------------------------------------------------------------------------------------------------------------------------------------------------------------------------------------------------------------------------------|---------|--------|
| 214024_s_at | DGCR6L        | DiGeorge syndrome critical region gene 6-like                                                                                                                                                                                                                                                                                                                                  | -0.1532 | 0.0011 |
| 214027_x_at | DES           | desmin, family with sequence similarity 48; member A                                                                                                                                                                                                                                                                                                                           | -0.3504 | 0.049  |
| 214029_at   | SLC25A42      | Solute carrier family 25; member 42                                                                                                                                                                                                                                                                                                                                            | -0.1502 | 0.0067 |
| 214030_at   | DKFZp667G2110 | hypothetical protein DKFZp667G2110                                                                                                                                                                                                                                                                                                                                             | -1.0672 | 0.0013 |
| 214031_s_at | KRT7          | Keratin 7                                                                                                                                                                                                                                                                                                                                                                      | -0.1116 | 0.036  |
| 214038_at   | CCL8          | chemokine (C-C motif) ligand 8                                                                                                                                                                                                                                                                                                                                                 | -2.5479 | 0      |
| 214042_s_at | RPL22         | ribosomal protein L22                                                                                                                                                                                                                                                                                                                                                          | -0.5279 | 0.0002 |
| 214047_s_at | MBD4          | methyl-CpG binding domain protein 4                                                                                                                                                                                                                                                                                                                                            | -0.6657 | 0.002  |
| 214054_at   | DOK2          | docking protein 2; 56kDa                                                                                                                                                                                                                                                                                                                                                       | -0.5874 | 0.006  |
| 214056_at   | MCL1          | Myeloid cell leukemia sequence 1 (BCL2-related)                                                                                                                                                                                                                                                                                                                                | -1.4231 | 0      |
| 214057_at   | MCL1          | Myeloid cell leukemia sequence 1 (BCL2-related)                                                                                                                                                                                                                                                                                                                                | -0.4243 | 0.002  |
| 214064_at   | TF            | transferrin                                                                                                                                                                                                                                                                                                                                                                    | -0.2429 | 0.0018 |
| 214066_x_at | NPR2          | natriuretic peptide receptor B/guanylate cyclase B (atrionatriuretic peptide receptor B)                                                                                                                                                                                                                                                                                       | -1.0032 | 0      |
| 214072_x_at | NENF          | Neuron derived neurotrophic factor                                                                                                                                                                                                                                                                                                                                             | -0.2168 | 0.0094 |
| 214073_at   | CTTN          | cortactin                                                                                                                                                                                                                                                                                                                                                                      | -1.9811 | 0.0001 |
| 214074_s_at | CTTN          | cortactin                                                                                                                                                                                                                                                                                                                                                                      | -0.983  | 0.0029 |
| 214077_x_at | MEIS3P1       | Meis homeobox 3 pseudogene 1                                                                                                                                                                                                                                                                                                                                                   | -1.1604 | 0.0018 |
| 214083_at   | PPP2R5C       | Protein phosphatase 2; regulatory subunit B'; gamma isoform                                                                                                                                                                                                                                                                                                                    | -1.0296 | 0      |
| 214084_x_at | LOC648998     | neutrophil cytosolic factor 1; (chronic granulomatous disease; autosomal 1), neutrophil cytosolic factor 1B pseudogene, neutrophil cytosolic factor 1C pseudogene, similar to Neutrophil cytosol factor 1 (NCF-1) (Neutrophil NADPH oxidase factor 1) (47 kDa neutrophil oxidase factor) (p47-phox) (NCF-47K) (47 kDa autosomal chronic granulomatous disease protein) (NOXO2) | -0.4561 | 0.0138 |
| 214091_s_at | GPX3          | glutathione peroxidase 3 (plasma)                                                                                                                                                                                                                                                                                                                                              | -2.8054 | 0.0001 |
| 214101_s_at |               | Transcribed locus                                                                                                                                                                                                                                                                                                                                                              | -0.4534 | 0.0272 |
| 214103_s_at | RAP2A         | RAP2A; member of RAS oncogene family                                                                                                                                                                                                                                                                                                                                           | -0.2229 | 0.0003 |
| 214106_s_at | GMDS          | GDP-mannose 4;6-dehydratase                                                                                                                                                                                                                                                                                                                                                    | -0.2964 | 0.0481 |
| 214110_s_at | LOC654342     | Similar to lymphocyte-specific protein 1                                                                                                                                                                                                                                                                                                                                       | -0.8435 | 0.0032 |
| 214112_s_at | CXorf40A      | chromosome X open reading frame 40A, chromosome X open reading frame 40B                                                                                                                                                                                                                                                                                                       | -1.6366 | 0      |
| 214115_at   | VAMP5         | Vesicle-associated membrane protein 5 (myobrevin)                                                                                                                                                                                                                                                                                                                              | -0.1466 | 0.0246 |
| 214124_x_at | FGFR1OP       | FGFR1 oncogene partner                                                                                                                                                                                                                                                                                                                                                         | -0.5114 | 0.034  |
| 214127_s_at | ARS2          | ARS2 protein                                                                                                                                                                                                                                                                                                                                                                   | -0.1394 | 0.0231 |
| 214135_at   | CLDN18        | claudin 18                                                                                                                                                                                                                                                                                                                                                                     | -0.136  | 0.0269 |

|             |              |                                                                                                  |         |        |
|-------------|--------------|--------------------------------------------------------------------------------------------------|---------|--------|
| 214141_x_at | SFRS7        | splicing factor; arginine/serine-rich 7; 35kDa                                                   | -0.5681 | 0.0246 |
| 214143_x_at | RPL24        | ribosomal protein L24, solute carrier family 36 (proton/amino acid symporter); member 2          | -0.2102 | 0.001  |
| 214149_s_at | ATP6V0E1     | ATPase; H+ transporting; lysosomal 9kDa; V0 subunit e1                                           | -0.4338 | 0.0212 |
| 214153_at   | ELOVL5       | ELOVL family member 5; elongation of long chain fatty acids (FEN1/Elo2; SUR4/Elo3-like; yeast)   | -0.9678 | 0.0003 |
| 214161_at   | OSGIN2       | Oxidative stress induced growth inhibitor family member 2                                        | -0.105  | 0.0216 |
| 214181_x_at | LST1         | leukocyte specific transcript 1                                                                  | -1.0002 | 0.0086 |
| 214183_s_at | TKTL1        | transketolase-like 1                                                                             | -0.1385 | 0.0219 |
| 214191_at   | ICA1         | islet cell autoantigen 1; 69kDa                                                                  | -0.1467 | 0.0063 |
| 214194_at   | DIS3         | DIS3 mitotic control homolog (S. cerevisiae)                                                     | -0.4785 | 0.0489 |
| 214207_s_at | CARD10       | Caspase recruitment domain family; member 10                                                     | -0.1681 | 0.0079 |
| 214210_at   | SLC25A17     | solute carrier family 25 (mitochondrial carrier; peroxisomal membrane protein; 34kDa); member 17 | -0.5885 | 0      |
| 214211_at   | FTH1         | ferritin; heavy polypeptide 1, ferritin; heavy polypeptide-like 16                               | -0.8761 | 0.0045 |
| 214214_s_at | C1QBP        | complement component 1; q subcomponent binding protein                                           | -0.5698 | 0.0005 |
| 214231_s_at | RP11-125A7.3 | KIAA0564 protein                                                                                 | -0.6805 | 0.0001 |
| 214233_at   | GGA2         | Golgi associated; gamma adaptin ear containing; ARF binding protein 2                            | -0.2185 | 0.0018 |
| 214239_x_at | PCGF2        | polycomb group ring finger 2                                                                     | -0.9203 | 0.0104 |
| 214243_s_at | SERHL        | serine hydrolase-like, serine hydrolase-like 2                                                   | -0.4226 | 0.0009 |
| 214247_s_at | DKK3         | dickkopf homolog 3 (Xenopus laevis)                                                              | -3.5191 | 0      |
| 214255_at   | ATP10A       | ATPase; Class V; type 10A                                                                        | -3.2664 | 0      |
| 214256_at   | ATP10A       | ATPase; Class V; type 10A                                                                        | -0.1802 | 0.0124 |
| 214258_x_at | HTATIP       | HIV-1 Tat interacting protein; 60kDa                                                             | -0.4022 | 0.0296 |
| 214259_s_at | AKR7A2       | aldo-keto reductase family 7; member A2 (aflatoxin aldehyde reductase)                           | -1.2244 | 0      |
| 214262_at   | TRIP6        | thyroid hormone receptor interactor 6                                                            | -0.1586 | 0.0108 |
| 214265_at   | ITGA8        | integrin; alpha 8                                                                                | -1.5206 | 0.001  |
| 214274_s_at | ACAA1        | acetyl-Coenzyme A acyltransferase 1 (peroxisomal 3-oxoacyl-Coenzyme A thiolase)                  | -0.7853 | 0      |
| 214275_at   | MED12        | Mediator of RNA polymerase II transcription; subunit 12 homolog (S. cerevisiae)                  | -0.1267 | 0.0008 |
| 214278_s_at | NDRG2        | NDRG family member 2                                                                             | -0.2279 | 0.0003 |
| 214279_s_at | NDRG2        | NDRG family member 2                                                                             | -2.4094 | 0.0003 |
| 214309_s_at | C21orf2      | Chromosome 21 open reading frame 2                                                               | -0.1308 | 0.0271 |
| 214317_x_at | RPS9         | ribosomal protein S9                                                                             | -0.165  | 0.002  |

|             |          |                                                                                                                                                       |         |        |
|-------------|----------|-------------------------------------------------------------------------------------------------------------------------------------------------------|---------|--------|
| 214321_at   | NOV      | nephroblastoma overexpressed gene                                                                                                                     | -3.0072 | 0.004  |
| 214325_at   | GP2      | glycoprotein 2 (zymogen granule membrane)                                                                                                             | -0.1077 | 0.0204 |
| 214326_x_at | JUND     | jun D proto-oncogene                                                                                                                                  | -0.7003 | 0.008  |
| 214327_x_at | TPT1     | tumor protein; translationally-controlled 1                                                                                                           | -0.147  | 0.0216 |
| 214329_x_at | TNFSF10  | tumor necrosis factor (ligand) superfamily; member 10                                                                                                 | -1.4974 | 0.0002 |
| 214330_at   | ATPAF2   | ATP synthase mitochondrial F1 complex assembly factor 2                                                                                               | -0.5802 | 0      |
| 214342_at   | ATXN7L1  | ataxin 7-like 1                                                                                                                                       | -0.1318 | 0.028  |
| 214344_at   | LOC92973 | hypothetical protein LOC92973                                                                                                                         | -0.1508 | 0.0031 |
| 214347_s_at | DDC      | dopa decarboxylase (aromatic L-amino acid decarboxylase)                                                                                              | -0.1846 | 0.0046 |
| 214350_at   | SNTB2    | Syntrophin; beta 2 (dystrophin-associated protein A1; 59kDa; basic component 2)                                                                       | -0.1284 | 0.0362 |
| 214360_at   | SMARCA4  | SWI/SNF related; matrix associated; actin dependent regulator of chromatin; subfamily a; member 4                                                     | -0.105  | 0.01   |
| 214366_s_at | ALOX5    | arachidonate 5-lipoxygenase                                                                                                                           | -0.3482 | 0.0005 |
| 214368_at   | RASGRP2  | RAS guanyl releasing protein 2 (calcium and DAG-regulated)                                                                                            | -0.3584 | 0.0114 |
| 214369_s_at | RASGRP2  | RAS guanyl releasing protein 2 (calcium and DAG-regulated)                                                                                            | -1.0093 | 0      |
| 214379_at   |          | Transcribed locus                                                                                                                                     | -0.2049 | 0.005  |
| 214382_at   | UNC93A   | unc-93 homolog A (C. elegans)                                                                                                                         | -0.1262 | 0.0337 |
| 214391_x_at | PTGER1   | prostaglandin E receptor 1 (subtype EP1); 42kDa                                                                                                       | -0.1143 | 0.0221 |
| 214393_at   | RND2     | Rho family GTPase 2                                                                                                                                   | -0.1581 | 0.0081 |
| 214394_x_at | EEF1D    | eukaryotic translation elongation factor 1 delta (guanine nucleotide exchange protein), eukaryotic translation elongation factor 1 delta pseudogene 1 | -0.3126 | 0.0232 |
| 214395_x_at |          | CDNA clone IMAGE:4838699                                                                                                                              | -0.2429 | 0.0333 |
| 214396_s_at | MBD2     | methyl-CpG binding domain protein 2                                                                                                                   | -0.1246 | 0.0228 |
| 214399_s_at | KRT4     | Keratin 4                                                                                                                                             | -0.1033 | 0.043  |
| 214404_x_at | SPDEF    | SAM pointed domain containing ets transcription factor                                                                                                | -0.2733 | 0.004  |
| 214414_x_at | HBA2     | hemoglobin; alpha 2                                                                                                                                   | -1.3601 | 0.0196 |
| 214417_s_at | FETUB    | Fetuin B                                                                                                                                              | -0.103  | 0.0239 |
| 214424_s_at |          | CDNA FLJ46657 fis; clone TRACH3006264                                                                                                                 | -0.1053 | 0.0378 |
| 214429_at   | MTMR6    | myotubularin related protein 6                                                                                                                        | -1.0387 | 0      |
| 214433_s_at | SELENBP1 | selenium binding protein 1                                                                                                                            | -2.9006 | 0      |
| 214434_at   | HSPA12A  | heat shock 70kDa protein 12A                                                                                                                          | -1.2313 | 0.0208 |
| 214439_x_at | BIN1     | bridging integrator 1                                                                                                                                 | -1.6205 | 0.0037 |
| 214446_at   | ELL2     | elongation factor; RNA polymerase II; 2                                                                                                               | -1.3629 | 0      |
| 214449_s_at | RHOQ     | ras homolog gene family; member Q                                                                                                                     | -0.6053 | 0.0406 |

|             |          |                                                                                                                                      |         |        |
|-------------|----------|--------------------------------------------------------------------------------------------------------------------------------------|---------|--------|
| 214451_at   | TFAP2B   | transcription factor AP-2 beta (activating enhancer binding protein 2 beta)                                                          | -0.2919 | 0.0012 |
| 214454_at   | ADAMTS2  | ADAM metalloproteinase with thrombospondin type 1 motif, 2                                                                           | -0.4785 | 0      |
| 214456_x_at | SAA1     | serum amyloid A1                                                                                                                     | -1.014  | 0      |
| 214457_at   | HOXA2    | homeobox A2                                                                                                                          | -0.9483 | 0      |
| 214467_at   | GPR65    | G protein-coupled receptor 65                                                                                                        | -0.6414 | 0.0233 |
| 214480_at   | ETV3     | ets variant gene 3                                                                                                                   | -0.1214 | 0.0067 |
| 214490_at   | ARSF     | arylsulfatase F                                                                                                                      | -0.2375 | 0.0073 |
| 214503_x_at | GPR135   | G protein-coupled receptor 135                                                                                                       | -0.138  | 0.047  |
| 214506_at   | ADMR     | adrenomedullin receptor                                                                                                              | -0.5037 | 0      |
| 214508_x_at | CREM     | cAMP responsive element modulator                                                                                                    | -3.3046 | 0      |
| 214521_at   | HES2     | hairy and enhancer of split 2 (Drosophila)                                                                                           | -0.1659 | 0.0071 |
| 214524_at   | GHRH     | growth hormone releasing hormone                                                                                                     | -0.2051 | 0.0024 |
| 214528_s_at | PAX8     | paired box 8                                                                                                                         | -0.2128 | 0.0002 |
| 214534_at   | HIST1H1B | histone cluster 1; H1b                                                                                                               | -0.169  | 0.0029 |
| 214535_s_at | ADAMTS2  | ADAM metalloproteinase with thrombospondin type 1 motif, 2                                                                           | -0.2164 | 0.0009 |
| 214536_at   | SLURP1   | secreted LY6/PLAUR domain containing 1                                                                                               | -0.1755 | 0.038  |
| 214538_x_at | RGS6     | regulator of G-protein signaling 6                                                                                                   | -0.1419 | 0.0124 |
| 214565_s_at | SMR3A    | submaxillary gland androgen regulated protein 3 homolog A (mouse), submaxillary gland androgen regulated protein 3 homolog B (mouse) | -0.4011 | 0      |
| 214574_x_at | LST1     | leukocyte specific transcript 1                                                                                                      | -1.1403 | 0.0019 |
| 214583_at   | DDI2     | DDI1; DNA-damage inducible 1; homolog 2 (S. cerevisiae)                                                                              | -0.8822 | 0      |
| 214585_s_at | VPS52    | vacuolar protein sorting 52 homolog (S. cerevisiae)                                                                                  | -0.6178 | 0.0008 |
| 214589_at   | FGF12    | fibroblast growth factor 12                                                                                                          | -1.7715 | 0      |
| 214591_at   | KLHL4    | kelch-like 4 (Drosophila)                                                                                                            | -4.2891 | 0      |
| 214599_at   | IVL      | involucrin                                                                                                                           | -0.1883 | 0.0181 |
| 214602_at   | COL4A4   | collagen; type IV; alpha 4                                                                                                           | -1.8991 | 0      |
| 214607_at   | PAK3     | p21 (CDKN1A)-activated kinase 3                                                                                                      | -0.7626 | 0.001  |
| 214609_at   | PHOX2A   | paired-like homeobox 2a                                                                                                              | -0.3761 | 0.0009 |
| 214610_at   | CYP11B1  | cytochrome P450; family 11; subfamily B; polypeptide 1                                                                               | -3.3192 | 0.0058 |
| 214622_at   | CYP21A2  | cytochrome P450; family 21; subfamily A; polypeptide 2                                                                               | -1.7906 | 0.0216 |
| 214625_s_at | MINK1    | misshapen-like kinase 1 (zebrafish)                                                                                                  | -0.2566 | 0.0284 |
| 214630_at   | CYP11B2  | cytochrome P450; family 11; subfamily B; polypeptide 2                                                                               | -1.5415 | 0.0311 |
| 214635_at   | CLDN9    | claudin 9                                                                                                                            | -0.1824 | 0.0422 |
| 214636_at   | CALCB    | calcitonin-related polypeptide; beta                                                                                                 | -0.1482 | 0.0036 |
| 214637_at   | OSM      | oncostatin M                                                                                                                         | -0.1273 | 0.0487 |
| 214641_at   | COL4A3   | collagen; type IV; alpha 3 (Goodpasture antigen)                                                                                     | -1.7863 | 0      |

|             |          |                                                                                                             |         |        |
|-------------|----------|-------------------------------------------------------------------------------------------------------------|---------|--------|
| 214643_x_at | BIN1     | bridging integrator 1                                                                                       | -0.4348 | 0.0256 |
| 214648_at   | GPX5     | glutathione peroxidase 5 (epididymal androgen-related protein)                                              | -0.1383 | 0.0199 |
| 214665_s_at | CHP      | calcium binding protein P22                                                                                 | -0.2823 | 0.0223 |
| 214674_at   | USP19    | ubiquitin specific peptidase 19                                                                             | -0.4813 | 0      |
| 214683_s_at | CLK1     | CDC-like kinase 1                                                                                           | -0.9496 | 0      |
| 214684_at   | MEF2A    | myocyte enhancer factor 2A                                                                                  | -0.3789 | 0.0184 |
| 214688_at   | TLE4     | transducin-like enhancer of split 4 (E(sp1) homolog; Drosophila)                                            | -0.2383 | 0.0027 |
| 214689_at   | PAPPA2   | pappalysin 2                                                                                                | -0.1976 | 0.0108 |
| 214696_at   | MGC14376 | hypothetical protein MGC14376                                                                               | -2.5527 | 0      |
| 214708_at   | SNTB1    | syntrophin; beta 1 (dystrophin-associated protein A1; 59kDa; basic component 1)                             | -1.8689 | 0.0012 |
| 214713_at   | YLPM1    | YLP motif containing 1                                                                                      | -0.2577 | 0.0173 |
| 214721_x_at | CDC42EP4 | CDC42 effector protein (Rho GTPase binding) 4                                                               | -1.253  | 0      |
| 214724_at   | DIXDC1   | DIX domain containing 1                                                                                     | -1.1448 | 0.0115 |
| 214733_s_at | YIPF1    | Yip1 domain family; member 1                                                                                | -0.4274 | 0.0229 |
| 214744_s_at |          | Transcribed locus; strongly similar to XP_001102967.1 similar to 60S ribosomal protein L23 [Macaca mulatta] | -0.7108 | 0      |
| 214770_at   | MSR1     | macrophage scavenger receptor 1                                                                             | -1.9671 | 0.0004 |
| 214771_x_at | M-RIP    | myosin phosphatase-Rho interacting protein                                                                  | -0.6034 | 0.0006 |
| 214774_x_at | TOX3     | TOX high mobility group box family member 3                                                                 | -0.4443 | 0.0116 |
| 214779_s_at | SGSM3    | small G protein signaling modulator 3                                                                       | -0.6143 | 0.0068 |
| 214792_x_at | VAMP2    | vesicle-associated membrane protein 2 (synaptobrevin 2)                                                     | -1.2094 | 0.0007 |
| 214801_at   |          | CDNA FLJ11392 fis; clone HEMBA1000575                                                                       | -0.8137 | 0.0007 |
| 214805_at   | EIF4A1   | Eukaryotic translation initiation factor 4A; isoform 1                                                      | -1.4415 | 0.0008 |
| 214822_at   | FAM5B    | family with sequence similarity 5; member B                                                                 | -1.3663 | 0      |
| 214823_at   | ZNF204   | zinc finger protein 204                                                                                     | -0.7661 | 0.0348 |
| 214824_at   |          |                                                                                                             | -0.2362 | 0.001  |
| 214835_s_at | SUCLG2   | succinate-CoA ligase; GDP-forming; beta subunit                                                             | -1.0389 | 0      |
| 214847_s_at | GPSM3    | G-protein signaling modulator 3 (AGS3-like; C. elegans)                                                     | -0.2441 | 0.0205 |
| 214858_at   |          | Pp14571                                                                                                     | -0.163  | 0.0018 |
| 214864_s_at | GRHPR    | glyoxylate reductase/hydroxypyruvate reductase                                                              | -0.5842 | 0.0124 |
| 214880_x_at | CALD1    | caldesmon 1                                                                                                 | -0.4563 | 0.0144 |
| 214894_x_at | MACF1    | microtubule-actin crosslinking factor 1                                                                     | -0.6142 | 0.0007 |
| 214910_s_at | APOM     | apolipoprotein M                                                                                            | -0.394  | 0.0001 |

|             |           |                                                                                                         |         |        |
|-------------|-----------|---------------------------------------------------------------------------------------------------------|---------|--------|
| 214919_s_at | EIF4EBP3  | MASK-4E-BP3 alternate reading frame gene, eukaryotic translation initiation factor 4E binding protein 3 | -1.1281 | 0.0012 |
| 214921_at   | KCNMA1    | potassium large conductance calcium-activated channel; subfamily M; alpha member 1                      | -0.1225 | 0.0497 |
| 214940_s_at | SMG6      | Smg-6 homolog; nonsense mediated mRNA decay factor (C. elegans)                                         | -0.3813 | 0.0031 |
| 214945_at   | LOC202134 | NY-REN-7 antigen, hypothetical protein LOC202134, hypothetical protein LOC653316                        | -2.4362 | 0.0015 |
| 214955_at   | TMPRSS6   | transmembrane protease; serine 6                                                                        | -0.1821 | 0.0271 |
| 214956_at   | AAK1      | AP2 associated kinase 1                                                                                 | -0.2219 | 0.013  |
| 214957_at   | ACTL8     | actin-like 8                                                                                            | -0.1652 | 0.0333 |
| 214965_at   | SPATA2L   | spermatogenesis associated 2-like                                                                       | -1.2032 | 0.0001 |
| 214979_at   | ABCC3     | ATP-binding cassette; sub-family C (CFTR/MRP); member 3                                                 | -0.1776 | 0.0033 |
| 214990_at   |           |                                                                                                         | -0.2208 | 0.0421 |
| 214998_at   | AAK1      | AP2 associated kinase 1                                                                                 | -0.1665 | 0.0034 |
| 215000_s_at | FEZ2      | fasciculation and elongation protein zeta 2 (zygin II)                                                  | -0.761  | 0.0025 |
| 215001_s_at | GLUL      | glutamate-ammonia ligase (glutamine synthetase)                                                         | -1.1124 | 0.0004 |
| 215016_x_at | DST       | dystonin                                                                                                | -0.5202 | 0.0306 |
| 215019_x_at | ZNF528    | zinc finger protein 528                                                                                 | -0.1994 | 0.0147 |
| 215025_at   | NTRK3     | neurotrophic tyrosine kinase; receptor; type 3                                                          | -0.165  | 0.01   |
| 215028_at   | SEMA6A    | sema domain; transmembrane domain (TM); and cytoplasmic domain; (semaphorin) 6A                         | -4.1665 | 0      |
| 215034_s_at | TM4SF1    | transmembrane 4 L six family member 1                                                                   | -2.7156 | 0.0001 |
| 215036_at   |           | Immunoglobulin anti-HBsAg lambda light chain (LM25)                                                     | -0.1317 | 0.005  |
| 215041_s_at | DOCK9     | dedicator of cytokinesis 9                                                                              | -0.1353 | 0.0134 |
| 215042_at   | BMP6      | bone morphogenetic protein 6                                                                            | -0.1687 | 0.0072 |
| 215049_x_at | CD163     | CD163 molecule                                                                                          | -3.0707 | 0      |
| 215050_x_at | MAPKAPK2  | mitogen-activated protein kinase-activated protein kinase 2                                             | -0.7372 | 0.0002 |
| 215051_x_at | AIF1      | allograft inflammatory factor 1                                                                         | -2.7352 | 0      |
| 215055_at   | B3GNTL1   | UDP-GlcNAc:betaGal beta-1;3-N-acetylglucosaminyltransferase-like 1                                      | -0.2339 | 0.0021 |
| 215061_at   | LOC399818 | similar to CG9643-PA                                                                                    | -0.1391 | 0.0285 |
| 215065_at   | PHF8      | PHD finger protein 8                                                                                    | -0.1194 | 0.0257 |
| 215073_s_at | NR2F2     | nuclear receptor subfamily 2; group F; member 2                                                         | -1.3188 | 0.0007 |
| 215081_at   | KIAA1024  | KIAA1024 protein                                                                                        | -2.7825 | 0      |
| 215085_x_at | DLEC1     | deleted in lung and esophageal cancer 1                                                                 | -0.2852 | 0.001  |
| 215088_s_at | SDHC      | succinate dehydrogenase complex; subunit C; integral membrane protein; 15kDa                            | -0.5791 | 0.0114 |
| 215091_s_at | GTF3A     | general transcription factor IIIA                                                                       | -0.5952 | 0.0071 |

|             |           |                                                                                                                                              |         |        |
|-------------|-----------|----------------------------------------------------------------------------------------------------------------------------------------------|---------|--------|
| 215106_at   | TTC22     | tetratricopeptide repeat domain 22                                                                                                           | -0.1106 | 0.0222 |
| 215108_x_at | TOX3      | TOX high mobility group box family member 3                                                                                                  | -0.3324 | 0.0042 |
| 215115_x_at | NTRK3     | neurotrophic tyrosine kinase; receptor; type 3                                                                                               | -0.2225 | 0.0105 |
| 215129_at   | PIK3C2G   | phosphoinositide-3-kinase; class 2; gamma polypeptide                                                                                        | -0.2315 | 0.0002 |
| 215137_at   | KIAA0508  | KIAA0508 protein                                                                                                                             | -0.1748 | 0.0156 |
| 215141_at   | C4orf10   | chromosome 4 open reading frame 10                                                                                                           | -0.1374 | 0.0067 |
| 215146_s_at | TTC28     | tetratricopeptide repeat domain 28                                                                                                           | -0.5101 | 0.0486 |
| 215154_at   | ULK2      | Unc-51-like kinase 2 (C. elegans)                                                                                                            | -0.4075 | 0      |
| 215173_at   | LRRC50    | leucine rich repeat containing 50                                                                                                            | -0.1525 | 0.0107 |
| 215183_at   |           | Clone HQ0072                                                                                                                                 | -0.1326 | 0.0038 |
| 215193_x_at | HLA-DRB1  | hypothetical protein LOC730415, major histocompatibility complex; class II; DR beta 1, major histocompatibility complex; class II; DR beta 3 | -2.05   | 0.0046 |
| 215195_at   | PRKCA     | protein kinase C; alpha                                                                                                                      | -1.3015 | 0.0064 |
| 215198_s_at | CALD1     | caldesmon 1                                                                                                                                  | -0.4972 | 0.005  |
| 215199_at   | CALD1     | caldesmon 1                                                                                                                                  | -0.9597 | 0      |
| 215217_at   |           |                                                                                                                                              | -0.139  | 0.0182 |
| 215225_s_at | GPR17     | G protein-coupled receptor 17                                                                                                                | -0.1226 | 0.0091 |
| 215237_at   | DOCK9     | dedicator of cytokinesis 9                                                                                                                   | -0.1905 | 0.0106 |
| 215243_s_at | GJB3      | gap junction protein; beta 3; 31kDa                                                                                                          | -0.2113 | 0.0091 |
| 215261_at   |           | Clone 23578 mRNA sequence                                                                                                                    | -0.1317 | 0.0265 |
| 215265_at   | EMX1      | empty spiracles homeobox 1                                                                                                                   | -0.196  | 0.0084 |
| 215266_at   | DNAH3     | dynein; axonemal; heavy chain 3                                                                                                              | -0.1707 | 0.0195 |
| 215271_at   | TNN       | tenascin N                                                                                                                                   | -0.2484 | 0      |
| 215273_s_at | TADA3L    | transcriptional adaptor 3 (NGG1 homolog; yeast)-like                                                                                         | -0.775  | 0.0039 |
| 215288_at   | LOC650465 | similar to Short transient receptor potential channel 2 (TrpC2) (mTrp2)                                                                      | -0.1397 | 0.0005 |
| 215292_s_at | MKL1      | megakaryoblastic leukemia (translocation) 1                                                                                                  | -0.2404 | 0.0024 |
| 215294_s_at | SMARCA1   | SWI/SNF related; matrix associated; actin dependent regulator of chromatin; subfamily a; member 1                                            | -0.9429 | 0.0242 |
| 215299_x_at | SULT1A1   | sulfotransferase family; cytosolic; 1A; phenol-preferring; member 1                                                                          | -0.9174 | 0.0284 |
| 215305_at   | PDGFRA    | platelet-derived growth factor receptor; alpha polypeptide                                                                                   | -0.4312 | 0      |
| 215306_at   |           | MRNA; cDNA DKFZp586N2020 (from clone DKFZp586N2020)                                                                                          | -1.1919 | 0      |
| 215311_at   |           | CDNA FLJ37610 fis; clone BRCOC2011398                                                                                                        | -0.3622 | 0      |
| 215325_x_at | C19orf26  | chromosome 19 open reading frame 26                                                                                                          | -0.2335 | 0.0007 |
| 215332_s_at | CD8B      | CD8b molecule                                                                                                                                | -0.1634 | 0.0287 |
| 215333_x_at | GSTM1     | glutathione S-transferase M1                                                                                                                 | -1.3214 | 0.0393 |
| 215353_at   |           |                                                                                                                                              | -0.1288 | 0.0254 |

|             |           |                                                                                                                                                                                                                                                                                                                                |         |        |
|-------------|-----------|--------------------------------------------------------------------------------------------------------------------------------------------------------------------------------------------------------------------------------------------------------------------------------------------------------------------------------|---------|--------|
| 215388_s_at | CFH       | complement factor H, complement factor H-related 1                                                                                                                                                                                                                                                                             | -2.2632 | 0      |
| 215389_s_at | TNNT2     | troponin T type 2 (cardiac)                                                                                                                                                                                                                                                                                                    | -0.2772 | 0.0003 |
| 215393_s_at | COBLL1    | COBL-like 1                                                                                                                                                                                                                                                                                                                    | -0.3995 | 0      |
| 215403_at   |           | CDNA: FLJ21207 fis; clone COL00362                                                                                                                                                                                                                                                                                             | -0.1649 | 0.0094 |
| 215405_at   |           | CDNA: FLJ21419 fis; clone COL04084                                                                                                                                                                                                                                                                                             | -0.101  | 0.0442 |
| 215410_at   | LOC392713 | PMS2 postmeiotic segregation increased 2 (S. cerevisiae)-like, postmeiotic segregation increased 2-like 1, postmeiotic segregation increased 2-like 2, postmeiotic segregation increased 2-like 5, similar to PMS1 protein homolog 2 (DNA mismatch repair protein PMS2), similar to postmeiotic segregation increased 2-like 2 | -0.1483 | 0.0457 |
| 215414_at   | FARS2     | Phenylalanyl-tRNA synthetase 2; mitochondrial                                                                                                                                                                                                                                                                                  | -0.1754 | 0.0056 |
| 215418_at   | PARVA     | parvin; alpha                                                                                                                                                                                                                                                                                                                  | -0.4028 | 0.0013 |
| 215423_at   |           | Cri-du-chat region mRNA; clone NIBB11                                                                                                                                                                                                                                                                                          | -0.3015 | 0      |
| 215442_s_at | TSHR      | thyroid stimulating hormone receptor                                                                                                                                                                                                                                                                                           | -0.1422 | 0.0462 |
| 215444_s_at | TRIM31    | tripartite motif-containing 31                                                                                                                                                                                                                                                                                                 | -0.1364 | 0.0141 |
| 215449_at   | BZRPL1    | benzodiazapine receptor (peripheral)-like 1                                                                                                                                                                                                                                                                                    | -0.1405 | 0.0095 |
| 215471_s_at | MAP7      | microtubule-associated protein 7                                                                                                                                                                                                                                                                                               | -0.4433 | 0.0019 |
| 215479_at   |           | CDNA FLJ20780 fis; clone COL04256                                                                                                                                                                                                                                                                                              | -1.3928 | 0      |
| 215482_s_at | EIF2B4    | eukaryotic translation initiation factor 2B; subunit 4 delta; 67kDa                                                                                                                                                                                                                                                            | -0.8275 | 0.0007 |
| 215490_at   | C1orf69   | chromosome 1 open reading frame 69                                                                                                                                                                                                                                                                                             | -0.2596 | 0.0006 |
| 215496_at   | SAMD4A    | sterile alpha motif domain containing 4A                                                                                                                                                                                                                                                                                       | -0.1469 | 0.0049 |
| 215534_at   |           | MRNA; cDNA DKFZp586C1923 (from clone DKFZp586C1923)                                                                                                                                                                                                                                                                            | -0.1242 | 0.018  |
| 215543_s_at | LARGE     | like-glycosyltransferase                                                                                                                                                                                                                                                                                                       | -0.4954 | 0.0295 |
| 215552_s_at | ESR1      | estrogen receptor 1                                                                                                                                                                                                                                                                                                            | -0.1228 | 0.0295 |
| 215583_at   | TMEM63A   | Transmembrane protein 63A                                                                                                                                                                                                                                                                                                      | -0.2088 | 0.0225 |
| 215584_at   | HECW1     | HECT; C2 and WW domain containing E3 ubiquitin protein ligase 1                                                                                                                                                                                                                                                                | -0.1439 | 0.0316 |
| 215594_at   |           | PTR2 mRNA for repetitive sequence                                                                                                                                                                                                                                                                                              | -0.1072 | 0.0399 |
| 215598_at   | TTC12     | Tetratricopeptide repeat domain 12                                                                                                                                                                                                                                                                                             | -0.1816 | 0.0066 |
| 215602_at   | FGD2      | FYVE; RhoGEF and PH domain containing 2                                                                                                                                                                                                                                                                                        | -0.162  | 0.0152 |
| 215610_at   | LOC728263 | similar to beta-1,4-mannosyltransferase                                                                                                                                                                                                                                                                                        | -0.1537 | 0.0135 |
| 215617_at   |           | CDNA FLJ11754 fis; clone HEMBA1005588                                                                                                                                                                                                                                                                                          | -0.3866 | 0.0061 |
| 215630_at   |           | CDNA FLJ14102 fis; clone MAMMA1000940                                                                                                                                                                                                                                                                                          | -0.1392 | 0.0181 |
| 215633_x_at | LST1      | leukocyte specific transcript 1                                                                                                                                                                                                                                                                                                | -0.8485 | 0.009  |



|             |           |                                                                                                                                                                                                       |         |        |
|-------------|-----------|-------------------------------------------------------------------------------------------------------------------------------------------------------------------------------------------------------|---------|--------|
| 215643_at   |           | CDNA FLJ11740 fis; clone HEMBA1005500                                                                                                                                                                 | -0.3232 | 0.0001 |
| 215646_s_at | VCAN      | versican                                                                                                                                                                                              | -2.4715 | 0.0107 |
| 215651_at   |           |                                                                                                                                                                                                       | -0.1189 | 0.026  |
| 215662_at   |           | CDNA: FLJ21699 fis; clone COL09829                                                                                                                                                                    | -0.3191 | 0.0028 |
| 215665_at   | HSD3B2    | hydroxy-delta-5-steroid dehydrogenase; 3 beta- and steroid delta-isomerase 2, similar to 3 beta-hydroxysteroid dehydrogenase/delta 5-->4-isomerase type I (3Beta-HSD I) (Trophoblast antigen FDO161G) | -4.3715 | 0      |
| 215677_s_at | BRF1      | BRF1 homolog; subunit of RNA polymerase III transcription initiation factor IIIB ( <i>S. cerevisiae</i> )                                                                                             | -0.139  | 0.0151 |
| 215678_at   | LOC440792 | proline dehydrogenase (oxidase) 1 pseudogene                                                                                                                                                          | -0.1161 | 0.044  |
| 215684_s_at | ASCC2     | activating signal cointegrator 1 complex subunit 2                                                                                                                                                    | -0.9485 | 0.0011 |
| 215686_x_at | TFAP2B    | transcription factor AP-2 beta (activating enhancer binding protein 2 beta)                                                                                                                           | -0.1537 | 0.0247 |
| 215689_s_at | SHBG      | sex hormone-binding globulin                                                                                                                                                                          | -0.1637 | 0.0118 |
| 215693_x_at | DDX27     | DEAD (Asp-Glu-Ala-Asp) box polypeptide 27                                                                                                                                                             | -0.5549 | 0.0054 |
| 215709_at   | PRIM2     | primase; DNA; polypeptide 2 (58kDa)                                                                                                                                                                   | -0.1433 | 0.0389 |
| 215723_s_at | PLD1      | phospholipase D1; phosphatidylcholine-specific                                                                                                                                                        | -1.186  | 0.0001 |
| 215724_at   | PLD1      | phospholipase D1; phosphatidylcholine-specific                                                                                                                                                        | -0.2265 | 0.0015 |
| 215725_at   | DGCR11    | DiGeorge syndrome critical region gene 11                                                                                                                                                             | -0.2038 | 0.0429 |
| 215726_s_at | CYB5A     | cytochrome b5 type A (microsomal)                                                                                                                                                                     | -2.4928 | 0      |
| 215748_at   | FLJ33790  | Hypothetical protein FLJ33790                                                                                                                                                                         | -0.1371 | 0.0019 |
| 215759_at   | ANKRD53   | ankyrin repeat domain 53                                                                                                                                                                              | -0.1959 | 0.0031 |
| 215771_x_at | RET       | ret proto-oncogene                                                                                                                                                                                    | -0.2918 | 0.0148 |
| 215772_x_at | SUCLG2    | succinate-CoA ligase; GDP-forming; beta subunit                                                                                                                                                       | -0.971  | 0      |
| 215775_at   | THBS1     | Thrombospondin 1                                                                                                                                                                                      | -0.3979 | 0      |
| 215792_s_at | DNAJC11   | DnaJ (Hsp40) homolog; subfamily C; member 11                                                                                                                                                          | -0.494  | 0.0065 |
| 215794_x_at | GLUD2     | glutamate dehydrogenase 2                                                                                                                                                                             | -0.8581 | 0.0221 |
| 215800_at   | DUOX1     | dual oxidase 1                                                                                                                                                                                        | -0.4181 | 0.0031 |
| 215804_at   | EPHA1     | EPH receptor A1                                                                                                                                                                                       | -0.1496 | 0.0147 |
| 215809_at   | CYP2D6    | cytochrome P450; family 2; subfamily D; polypeptide 6                                                                                                                                                 | -0.1404 | 0.0229 |
| 215834_x_at | SCARB1    | scavenger receptor class B; member 1                                                                                                                                                                  | -1.0513 | 0.0329 |
| 215835_at   | SCARB1    | scavenger receptor class B; member 1                                                                                                                                                                  | -0.183  | 0.0048 |
| 215839_at   | LILRA5    | leukocyte immunoglobulin-like receptor; subfamily A (with TM domain); member 5                                                                                                                        | -0.1119 | 0.037  |
| 215849_x_at |           | CDNA FLJ12173 fis; clone MAMMA1000696                                                                                                                                                                 | -0.2709 | 0      |

|             |           |                                                                                                                                                                                                                                                                                          |         |        |
|-------------|-----------|------------------------------------------------------------------------------------------------------------------------------------------------------------------------------------------------------------------------------------------------------------------------------------------|---------|--------|
| 215865_at   | SYT12     | Synaptotagmin XII                                                                                                                                                                                                                                                                        | -0.1725 | 0.0012 |
| 215869_at   |           | CDNA FLJ12192 fis; clone MAMMA1000851                                                                                                                                                                                                                                                    | -0.1744 | 0.011  |
| 215872_at   |           |                                                                                                                                                                                                                                                                                          | -0.1702 | 0.0007 |
| 215875_at   |           | CDNA: FLJ23167 fis; clone LNG09902                                                                                                                                                                                                                                                       | -0.1473 | 0.04   |
| 215881_x_at | LOC652163 | similar to synovial sarcoma; X breakpoint 9, synovial sarcoma; X breakpoint 2, synovial sarcoma; X breakpoint 2B, synovial sarcoma; X breakpoint 3, synovial sarcoma; X breakpoint 5, synovial sarcoma; X breakpoint 7, synovial sarcoma; X breakpoint 9                                 | -0.1574 | 0.0433 |
| 215918_s_at | SPTBN1    | spectrin; beta; non-erythrocytic 1                                                                                                                                                                                                                                                       | -0.8865 | 0.0003 |
| 215935_at   | FAM75A1   | family with sequence similarity 75; member A1, family with sequence similarity 75; member A2, family with sequence similarity 75; member A3, family with sequence similarity 75; member A4, family with sequence similarity 75; member A5, family with sequence similarity 75; member A7 | -0.1791 | 0.006  |
| 215937_at   | PTGDR     | prostaglandin D2 receptor (DP)                                                                                                                                                                                                                                                           | -0.1831 | 0.0005 |
| 215951_at   | TBC1D2B   | TBC1 domain family; member 2B                                                                                                                                                                                                                                                            | -0.142  | 0.0065 |
| 215963_x_at | LOC642741 | similar to ribosomal protein L3 isoform a                                                                                                                                                                                                                                                | -0.2816 | 0.0023 |
| 215975_x_at | GK        | glycerol kinase                                                                                                                                                                                                                                                                          | -0.1551 | 0.0083 |
| 215982_s_at | DOM3Z     | dom-3 homolog Z (C. elegans)                                                                                                                                                                                                                                                             | -1.4918 | 0.0011 |
| 215983_s_at | UBXD6     | UBX domain containing 6                                                                                                                                                                                                                                                                  | -0.7824 | 0.0028 |
| 216001_at   | PRAMEF12  | PRAME family member 12                                                                                                                                                                                                                                                                   | -0.1188 | 0.0461 |
| 216042_at   | TNFRSF25  | tumor necrosis factor receptor superfamily; member 25                                                                                                                                                                                                                                    | -0.2338 | 0.0033 |
| 216061_x_at | PDGFB     | platelet-derived growth factor beta polypeptide (simian sarcoma viral (v-sis) oncogene homolog)                                                                                                                                                                                          | -0.3171 | 0.0431 |
| 216064_s_at | AGA       | aspartylglucosaminidase                                                                                                                                                                                                                                                                  | -1.0914 | 0.0186 |
| 216065_at   |           | Transcribed locus; strongly similar to XP_530916.1 hypothetical protein XP_530916 [Pan troglodytes]                                                                                                                                                                                      | -0.1717 | 0.0049 |
| 216079_at   | EPM2A     | epilepsy; progressive myoclonus type 2A; Lafora disease (laforin)                                                                                                                                                                                                                        | -0.135  | 0.0086 |
| 216082_at   | NEU3      | sialidase 3 (membrane sialidase)                                                                                                                                                                                                                                                         | -0.2338 | 0.0246 |
| 216102_at   | PHLDB1    | pleckstrin homology-like domain; family B; member 1                                                                                                                                                                                                                                      | -0.1852 | 0.0014 |
| 216122_at   |           | CDNA: FLJ20890 fis; clone ADKA03323                                                                                                                                                                                                                                                      | -0.1599 | 0.0317 |
| 216133_at   |           | T cell receptor V alpha gene segment V-alpha-w23; clone IGRa01                                                                                                                                                                                                                           | -0.1266 | 0.0204 |
| 216137_s_at | MAPK8IP3  | Mitogen-activated protein kinase 8 interacting protein 3                                                                                                                                                                                                                                 | -0.14   | 0.0188 |
| 216141_at   |           |                                                                                                                                                                                                                                                                                          | -0.186  | 0.0086 |
| 216143_at   |           | MRNA; cDNA DKFZp434L092 (from clone DKFZp434L092)                                                                                                                                                                                                                                        | -0.1784 | 0.0129 |

|             |           |                                                                        |         |        |
|-------------|-----------|------------------------------------------------------------------------|---------|--------|
| 216145_at   |           | Velo-cardio-facial syndrome 22q11 region mRNA sequence                 | -0.1711 | 0.0124 |
| 216152_at   |           | CDNA FLJ11571 fis; clone HEMBA1003328                                  | -0.1282 | 0.0329 |
| 216164_at   | LRRN2     | leucine rich repeat neuronal 2                                         | -0.1791 | 0.0061 |
| 216177_at   | LOC391132 | similar to 60S ribosomal protein L29 (P23)                             | -0.4285 | 0.0034 |
| 216179_x_at |           | CDNA: FLJ23520 fis; clone LNG04926                                     | -0.1994 | 0.0085 |
| 216182_at   | SYNJ2     | Synaptojanin 2                                                         | -0.156  | 0.0277 |
| 216184_s_at | RIMS1     | regulating synaptic membrane exocytosis 1                              | -0.1597 | 0.0364 |
| 216217_at   | PLCL2     | phospholipase C-like 2                                                 | -0.2376 | 0.0069 |
| 216225_at   |           | Clone IMAGE 25997                                                      | -1.1469 | 0      |
| 216233_at   | CD163     | CD163 molecule                                                         | -2.1217 | 0      |
| 216240_at   |           |                                                                        | -0.1412 | 0.0151 |
| 216246_at   |           |                                                                        | -0.3465 | 0.0037 |
| 216248_s_at | NR4A2     | nuclear receptor subfamily 4; group A; member 2                        | -5.8788 | 0      |
| 216253_s_at | PARVB     | parvin; beta                                                           | -0.3232 | 0.029  |
| 216257_at   | HSHUR7SEQ | UV-B repressed sequence; HUR 7                                         | -0.1203 | 0.0429 |
| 216260_at   | DICER1    | Dicer1; Dcr-1 homolog (Drosophila)                                     | -0.1851 | 0.0065 |
| 216270_at   | ILVBL     | ilvB (bacterial acetolactate synthase)-like                            | -0.157  | 0.0041 |
| 216271_x_at | SYDE1     | synapse defective 1; Rho GTPase; homolog 1 (C. elegans)                | -0.1359 | 0.0273 |
| 216293_at   | CLTA      | Clathrin; light chain (Lca)                                            | -0.2423 | 0.0114 |
| 216300_x_at | RARA      | retinoic acid receptor; alpha                                          | -0.4321 | 0.0005 |
| 216301_at   |           | Ig lambda light chain variable region                                  | -0.1727 | 0.0151 |
| 216308_x_at | GRHPR     | glyoxylate reductase/hydroxypyruvate reductase                         | -0.6263 | 0.0081 |
| 216311_at   | LOC644099 | similar to ovo-like 2 isoform A                                        | -0.103  | 0.0428 |
| 216324_at   |           |                                                                        | -0.1234 | 0.0136 |
| 216328_at   | SIGLEC8   | sialic acid binding Ig-like lectin 8                                   | -0.1692 | 0.0328 |
| 216336_x_at | MT1A      | metallothionein 1 pseudogene 2, metallothionein 1A, metallothionein 1M | -1.1144 | 0.0004 |
| 216340_s_at | CYP2A7P1  | cytochrome P450; family 2; subfamily A; polypeptide 7 pseudogene 1     | -0.226  | 0.0014 |
| 216343_at   | PCDHGA3   | protocadherin gamma subfamily A; 3                                     | -0.1821 | 0.0009 |
| 216348_at   | LOC402057 | ribosomal protein S17, similar to 40S ribosomal protein S17            | -0.4075 | 0.0018 |
| 216349_at   | LOC341651 | similar to Fumarate hydratase; mitochondrial precursor (Fumarase)      | -0.192  | 0.0235 |
| 216350_s_at | ZNF10     | zinc finger protein 10                                                 | -1.2415 | 0      |
| 216354_at   |           |                                                                        | -0.2141 | 0.0009 |
| 216363_at   |           |                                                                        | -0.2064 | 0.0022 |
| 216365_x_at | CPVL      | carboxypeptidase; vitellogenic-like, immunoglobulin lambda locus       | -0.133  | 0.0117 |

|             |             |                                                                                                                                                                                                                   |         |        |
|-------------|-------------|-------------------------------------------------------------------------------------------------------------------------------------------------------------------------------------------------------------------|---------|--------|
| 216367_at   | COL4A3      | collagen; type IV; alpha 3 (Goodpasture antigen)                                                                                                                                                                  | -0.1117 | 0.0117 |
| 216369_at   |             |                                                                                                                                                                                                                   | -0.1181 | 0.0302 |
| 216371_at   |             |                                                                                                                                                                                                                   | -0.3419 | 0.0017 |
| 216376_x_at |             |                                                                                                                                                                                                                   | -0.162  | 0.0028 |
| 216379_x_at | CD24        | CD24 molecule                                                                                                                                                                                                     | -1.4134 | 0.0323 |
| 216381_x_at | AKR7A3      | aldo-keto reductase family 7; member A3 (aflatoxin aldehyde reductase)                                                                                                                                            | -1.6502 | 0      |
| 216382_s_at | TNRC21      | trinucleotide repeat containing 21                                                                                                                                                                                | -0.1492 | 0.0049 |
| 216383_at   | hCG_2040224 | hCG2040224, ribosomal protein L18a, similar to ribosomal protein L18a, similar to ribosomal protein L18a; 60S ribosomal protein L18a                                                                              | -0.2044 | 0.0424 |
| 216409_at   | ACSL6       | Acyl-CoA synthetase long-chain family member 6                                                                                                                                                                    | -0.1312 | 0.0365 |
| 216410_at   | LOC643875   | similar to calponin 3; acidic                                                                                                                                                                                     | -0.1259 | 0.0285 |
| 216412_x_at | IVD         | Isovaleryl Coenzyme A dehydrogenase                                                                                                                                                                               | -0.1648 | 0.0354 |
| 216414_at   |             |                                                                                                                                                                                                                   | -0.1373 | 0.0261 |
| 216416_at   |             | CDNA: FLJ23601 fis; clone LNG15501                                                                                                                                                                                | -0.1301 | 0.0247 |
| 216421_at   |             |                                                                                                                                                                                                                   | -0.338  | 0.017  |
| 216431_at   |             |                                                                                                                                                                                                                   | -0.1202 | 0.0443 |
| 216434_at   | FLJ20699    | Hypothetical protein FLJ20699                                                                                                                                                                                     | -0.2255 | 0.0215 |
| 216438_s_at | TMSB4X      | thymosin-like 3, thymosin; beta 4; X-linked                                                                                                                                                                       | -0.1737 | 0.0399 |
| 216443_at   |             | CDNA: FLJ20962 fis; clone ADSh00804                                                                                                                                                                               | -0.1295 | 0.0232 |
| 216451_at   | STK38       | Serine/threonine kinase 38                                                                                                                                                                                        | -0.1726 | 0.0379 |
| 216456_at   |             | MRNA; cDNA DKFZp761L0812 (from clone DKFZp761L0812); partial cds                                                                                                                                                  | -0.2061 | 0.0103 |
| 216457_s_at | SF3A1       | splicing factor 3a; subunit 1; 120kDa                                                                                                                                                                             | -0.7989 | 0.0114 |
| 216477_at   |             |                                                                                                                                                                                                                   | -0.1374 | 0.0133 |
| 216479_at   | LOC387753   | 60S ribosomal protein L21 pseudogene, ribosomal protein L21, ribosomal protein L21 pseudogene, similar to 60S ribosomal protein L21, similar to ribosomal protein L21, similar to ribosomal protein L21 isoform 1 | -0.3859 | 0.0005 |
| 216490_x_at | LOC442175   | similar to 60S acidic ribosomal protein P2 (NY-REN-44 antigen)                                                                                                                                                    | -0.2482 | 0.0004 |
| 216492_at   | KIR3DX1     | killer cell immunoglobulin-like receptor; three domains; X1                                                                                                                                                       | -0.2368 | 0.0009 |
| 216495_x_at | IVD         | Isovaleryl Coenzyme A dehydrogenase                                                                                                                                                                               | -0.1945 | 0.002  |
| 216502_at   | ISG20L2     | interferon stimulated exonuclease gene 20kDa-like 2                                                                                                                                                               | -0.1541 | 0.023  |
| 216505_x_at | LOC133569   | ribosomal protein S10, ribosomal protein S10 pseudogene 3, similar to 40S ribosomal protein S10, similar to ribosomal protein S10                                                                                 | -0.3723 | 0.0021 |
| 216507_at   | TAPT1       | transmembrane anterior posterior transformation 1                                                                                                                                                                 | -0.1511 | 0.038  |

|             |             |                                                                                                                                                                  |         |        |
|-------------|-------------|------------------------------------------------------------------------------------------------------------------------------------------------------------------|---------|--------|
| 216513_at   | DCT         | dopachrome tautomerase (dopachrome delta-isomerase; tyrosine-related protein 2)                                                                                  | -0.1141 | 0.0409 |
| 216516_at   |             |                                                                                                                                                                  | -0.1483 | 0.0186 |
| 216520_s_at | TPT1        | tumor protein; translationally-controlled 1                                                                                                                      | -0.1611 | 0.0013 |
| 216547_at   | LOC127406   | similar to laminin receptor 1 (ribosomal protein SA)                                                                                                             | -0.3    | 0.0022 |
| 216562_at   |             |                                                                                                                                                                  | -0.1618 | 0.0005 |
| 216564_at   |             |                                                                                                                                                                  | -0.1076 | 0.0345 |
| 216565_x_at | LOC391020   | interferon induced transmembrane protein pseudogene                                                                                                              | -0.4987 | 0.0035 |
| 216566_at   |             | Immunoglobulin (mAb56) light chain V region mRNA; partial sequence                                                                                               | -0.1122 | 0.0174 |
| 216567_at   |             |                                                                                                                                                                  | -0.1248 | 0.0253 |
| 216570_x_at | LOC646417   | similar to 60S ribosomal protein L29 (P23)                                                                                                                       | -0.3828 | 0.0007 |
| 216577_at   |             |                                                                                                                                                                  | -0.1693 | 0.0236 |
| 216580_at   | hCG_2015956 | hCG2015956, hCG31916, hypothetical LOC120872, hypothetical LOC439954, ribosomal protein L7, similar to 60S ribosomal protein L7                                  | -0.1047 | 0.0478 |
| 216581_at   | KRT18P38    | keratin 18 pseudogene 38                                                                                                                                         | -0.1147 | 0.0449 |
| 216598_s_at | CCL2        | chemokine (C-C motif) ligand 2                                                                                                                                   | -4.9062 | 0      |
| 216613_at   |             | MRNA; cDNA DKFZp566L0824 (from clone DKFZp566L0824)                                                                                                              | -0.1109 | 0.0245 |
| 216615_s_at | HTR3A       | 5-hydroxytryptamine (serotonin) receptor 3A                                                                                                                      | -0.13   | 0.0218 |
| 216623_x_at | TOX3        | TOX high mobility group box family member 3                                                                                                                      | -0.4383 | 0.0375 |
| 216631_s_at | LOC642043   | similar to HLA class II histocompatibility antigen; DP alpha chain precursor (HLA-SB alpha chain) (MHC class II DP3-alpha) (DP(W3)) (DP(W4))                     | -0.1985 | 0.0164 |
| 216635_at   |             | MRNA; cDNA DKFZp566M0524 (from clone DKFZp566M0524)                                                                                                              | -0.1268 | 0.0408 |
| 216636_at   |             | MRNA; cDNA DKFZp566M0524 (from clone DKFZp566M0524)                                                                                                              | -0.1369 | 0.0178 |
| 216637_at   |             | MRNA; cDNA DKFZp586A0617 (from clone DKFZp586A0617)                                                                                                              | -0.1513 | 0.0145 |
| 216650_at   | LOC650303   | similar to 60S ribosomal protein L29 (Cell surface heparin binding protein HIP), similar to 60S ribosomal protein L29 (Cell surface heparin-binding protein HIP) | -0.3611 | 0.0003 |
| 216654_at   | TNXB        | tenascin XB                                                                                                                                                      | -0.1502 | 0.015  |
| 216679_at   | TIGD1L      | tigger transposable element derived 1-like                                                                                                                       | -0.234  | 0.0194 |
| 216696_s_at | PRODH2      | proline dehydrogenase (oxidase) 2                                                                                                                                | -0.1838 | 0.0428 |

|             |           |                                                                                                                                                                                                                                                                                                                                     |         |        |
|-------------|-----------|-------------------------------------------------------------------------------------------------------------------------------------------------------------------------------------------------------------------------------------------------------------------------------------------------------------------------------------|---------|--------|
| 216698_x_at | LOC441453 | olfactory receptor; family 7; subfamily E; member 18 pseudogene, olfactory receptor; family 7; subfamily E; member 35 pseudogene, olfactory receptor; family 7; subfamily E; member 37 pseudogene, olfactory receptor; family 7; subfamily E; member 47 pseudogene, similar to olfactory receptor; family 7; subfamily A; member 17 | -0.2169 | 0.0409 |
| 216700_at   | TRIO      | Triple functional domain (PTPRF interacting)                                                                                                                                                                                                                                                                                        | -0.1203 | 0.0135 |
| 216703_at   |           |                                                                                                                                                                                                                                                                                                                                     | -0.1189 | 0.0239 |
| 216704_at   |           | MRNA; cDNA DKFZp761P1114 (from clone DKFZp761P1114)                                                                                                                                                                                                                                                                                 | -0.1575 | 0.0081 |
| 216707_at   |           | MRNA; cDNA DKFZp761L0812 (from clone DKFZp761L0812); partial cds                                                                                                                                                                                                                                                                    | -0.192  | 0.0168 |
| 216708_x_at | IGL@      | Immunoglobulin lambda locus                                                                                                                                                                                                                                                                                                         | -0.2069 | 0.0073 |
| 216710_x_at | ZNF287    | zinc finger protein 287                                                                                                                                                                                                                                                                                                             | -0.1338 | 0.013  |
| 216715_at   |           |                                                                                                                                                                                                                                                                                                                                     | -0.1494 | 0.0361 |
| 216739_at   |           | CDNA: FLJ20874 fis; clone ADKA02818                                                                                                                                                                                                                                                                                                 | -0.1261 | 0.0389 |
| 216756_at   |           | CDNA: FLJ21342 fis; clone COL02673                                                                                                                                                                                                                                                                                                  | -0.3241 | 0.0169 |
| 216784_at   |           | CDNA: FLJ21769 fis; clone COLF7354                                                                                                                                                                                                                                                                                                  | -0.252  | 0.0218 |
| 216790_at   |           | CDNA: FLJ22812 fis; clone KAIA2955                                                                                                                                                                                                                                                                                                  | -0.1329 | 0.0168 |
| 216795_at   |           | CDNA: FLJ23194 fis; clone REC00490                                                                                                                                                                                                                                                                                                  | -0.1725 | 0.0106 |
| 216800_at   |           | CDNA: FLJ23416 fis; clone HEP20790                                                                                                                                                                                                                                                                                                  | -0.1269 | 0.0353 |
| 216806_at   | LOC652411 | similar to laminin receptor 1 (ribosomal protein SA)                                                                                                                                                                                                                                                                                | -0.1688 | 0.0245 |
| 216811_at   |           |                                                                                                                                                                                                                                                                                                                                     | -0.1336 | 0.0467 |
| 216815_at   |           |                                                                                                                                                                                                                                                                                                                                     | -0.1187 | 0.0124 |
| 216817_s_at | OR2H1     | olfactory receptor; family 2; subfamily H; member 1                                                                                                                                                                                                                                                                                 | -0.1346 | 0.0082 |
| 216819_at   | LOC391076 | similar to 3 beta-hydroxysteroid dehydrogenase/delta 5-->4-isomerase type II (3Beta-HSD II)                                                                                                                                                                                                                                         | -0.4218 | 0      |
| 216823_at   | LOC146053 | 40S ribosomal protein S3a pseudogene, ribosomal protein S3A, similar to 40S ribosomal protein S3a, similar to 40S ribosomal protein S3a (V-fos transformation effector protein), similar to ribosomal protein S3a                                                                                                                   | -0.3017 | 0.0001 |
| 216824_at   |           |                                                                                                                                                                                                                                                                                                                                     | -0.1105 | 0.0395 |
| 216826_at   |           |                                                                                                                                                                                                                                                                                                                                     | -0.1723 | 0.0005 |
| 216834_at   | RGS1      | regulator of G-protein signaling 1                                                                                                                                                                                                                                                                                                  | -1.2862 | 0.0167 |
| 216840_s_at | LAMA2     | laminin; alpha 2 (merosin; congenital muscular dystrophy)                                                                                                                                                                                                                                                                           | -2.2635 | 0.0001 |
| 216848_at   | KIAA1660  | KIAA1660 protein                                                                                                                                                                                                                                                                                                                    | -0.1437 | 0.0281 |
| 216854_at   | GDF11     | growth differentiation factor 11                                                                                                                                                                                                                                                                                                    | -0.1106 | 0.0456 |

|             |           |                                                                               |         |        |
|-------------|-----------|-------------------------------------------------------------------------------|---------|--------|
| 216872_at   | HR44      | Hr44 antigen                                                                  | -0.1369 | 0.0013 |
| 216875_x_at | HAB1      | B1 for mucin                                                                  | -0.1275 | 0.0219 |
| 216881_x_at | PRB4      | proline-rich protein BstNI subfamily 4                                        | -0.4021 | 0.0035 |
| 216886_at   | CHRNA4    | cholinergic receptor; nicotinic; alpha 4                                      | -0.1128 | 0.0382 |
| 216893_s_at | COL4A3    | collagen; type IV; alpha 3 (Goodpasture antigen)                              | -0.6882 | 0      |
| 216894_x_at | CDKN1C    | cyclin-dependent kinase inhibitor 1C (p57; Kip2)                              | -2.3755 | 0      |
| 216898_s_at | COL4A3    | collagen; type IV; alpha 3 (Goodpasture antigen)                              | -1.0985 | 0      |
| 216909_at   | RRP12     | ribosomal RNA processing 12 homolog (S. cerevisiae)                           | -0.1422 | 0.007  |
| 216914_at   | CDC25C    | cell division cycle 25 homolog C (S. pombe)                                   | -0.1143 | 0.0302 |
| 216932_at   |           |                                                                               | -0.1094 | 0.0295 |
| 216936_at   |           |                                                                               | -0.2886 | 0.0014 |
| 216938_x_at | DRD2      | dopamine receptor D2                                                          | -0.1924 | 0.0058 |
| 216946_at   | HLA-DOA   | major histocompatibility complex; class II; DO alpha                          | -0.202  | 0.0015 |
| 216953_s_at | WT1       | Wilms tumor 1                                                                 | -0.1316 | 0.0472 |
| 216958_s_at | IVD       | isovaleryl Coenzyme A dehydrogenase                                           | -0.9379 | 0.0101 |
| 216962_at   | OR5T2     | RPA interacting protein, olfactory receptor; family 5; subfamily T; member 2  | -0.1989 | 0.0002 |
| 216965_x_at | SPG20     | spastic paraplegia 20 (Troyer syndrome)                                       | -0.3088 | 0.0001 |
| 216979_at   | NR4A3     | nuclear receptor subfamily 4; group A; member 3                               | -1.8729 | 0      |
| 216981_x_at | SPN       | sialophorin (leukosialin; CD43)                                               | -0.2171 | 0.0033 |
| 216991_at   | ZNF224    | zinc finger protein 224                                                       | -0.115  | 0.0292 |
| 217000_at   | KRT18P50  | keratin 18 pseudogene 50                                                      | -0.1801 | 0.0188 |
| 217001_x_at | HLA-DOA   | major histocompatibility complex; class II; DO alpha                          | -0.1837 | 0.0081 |
| 217004_s_at | MCF2      | MCF.2 cell line derived transforming sequence                                 | -1.7667 | 0.0098 |
| 217005_at   | LDLR      | low density lipoprotein receptor (familial hypercholesterolemia)              | -0.1471 | 0.0067 |
| 217014_s_at | AZGP1     | alpha-2-glycoprotein 1; zinc-binding, similar to alpha-2-glycoprotein 1; zinc | -0.2317 | 0.0175 |
| 217015_at   | LOC727842 | similar to retinoblastoma binding protein 4                                   | -0.115  | 0.0149 |
| 217017_at   | OSBPL10   | oxysterol binding protein-like 10                                             | -0.183  | 0.0013 |
| 217021_at   | CYB5A     | cytochrome b5 type A (microsomal)                                             | -0.186  | 0.0016 |
| 217035_at   |           | Immunoglobulin heavy chain variable region (clone Agamma5-3)                  | -0.2666 | 0.0041 |
| 217036_at   |           | Immunoglobulin kappa chain; V-region (SPK.3)                                  | -0.1776 | 0.0039 |
| 217041_at   | NPTXR     | neuronal pentraxin receptor                                                   | -0.2037 | 0.008  |
| 217047_s_at | FAM13A1   | family with sequence similarity 13; member A1                                 | -0.5997 | 0.05   |
| 217058_at   | GNAS      | GNAS complex locus                                                            | -0.2552 | 0.0312 |
| 217072_at   | CD300A    | CD300a molecule                                                               | -0.1092 | 0.0191 |

|             |              |                                                                                                                                                         |         |        |
|-------------|--------------|---------------------------------------------------------------------------------------------------------------------------------------------------------|---------|--------|
| 217083_at   | MAPKAPK5     | Mitogen-activated protein kinase-activated protein kinase 5                                                                                             | -0.1183 | 0.0152 |
| 217087_at   | C1orf68      | chromosome 1 open reading frame 68                                                                                                                      | -0.1667 | 0.0016 |
| 217088_s_at | NCR1         | natural cytotoxicity triggering receptor 1                                                                                                              | -0.1729 | 0.0016 |
| 217095_x_at | NCR1         | natural cytotoxicity triggering receptor 1                                                                                                              | -0.2392 | 0.0009 |
| 217103_at   | LDLR         | low density lipoprotein receptor (familial hypercholesterolemia)                                                                                        | -0.1544 | 0.0097 |
| 217113_at   | AMACR        | alpha-methylacyl-CoA racemase                                                                                                                           | -0.1188 | 0.0175 |
| 217118_s_at | C22orf9      | chromosome 22 open reading frame 9                                                                                                                      | -1.2137 | 0.004  |
| 217120_s_at | MED14        | mediator complex subunit 14                                                                                                                             | -0.1511 | 0.0058 |
| 217122_s_at | LOC728661    | similar to solute carrier family 35; member E2, solute carrier family 35; member E2                                                                     | -0.5476 | 0.0142 |
| 217127_at   | CTH          | cystathionase (cystathionine gamma-lyase)                                                                                                               | -5.9921 | 0      |
| 217131_at   |              |                                                                                                                                                         | -0.1903 | 0.0052 |
| 217144_at   | LOC648390    | similar to ubiquitin B precursor, ubiquitin B                                                                                                           | -0.5153 | 0.0386 |
| 217149_x_at | TNK1         | tyrosine kinase; non-receptor; 1                                                                                                                        | -0.1831 | 0.0172 |
| 217153_at   | ARHGAP1      | Rho GTPase activating protein 1                                                                                                                         | -0.1373 | 0.0073 |
| 217156_at   |              |                                                                                                                                                         | -0.2192 | 0.0268 |
| 217159_x_at | SIGLEC7      | sialic acid binding Ig-like lectin 7                                                                                                                    | -0.1774 | 0.0269 |
| 217162_at   | TSPY1        | testis specific protein; Y-linked 1                                                                                                                     | -0.1764 | 0.0165 |
| 217165_x_at | MT1F         | metallothionein 1F                                                                                                                                      | -1.5125 | 0.003  |
| 217174_s_at | APC2         | adenomatosis polyposis coli 2                                                                                                                           | -0.1118 | 0.0388 |
| 217177_s_at |              | CDNA FLJ13658 fis; clone PLACE1011567                                                                                                                   | -0.5186 | 0      |
| 217182_at   | MUC5AC       | mucin 5AC; oligomeric mucus/gel-forming                                                                                                                 | -0.2342 | 0.0205 |
| 217187_at   | MUC5AC       | mucin 5AC; oligomeric mucus/gel-forming                                                                                                                 | -0.243  | 0.0492 |
| 217190_x_at | ESR1         | estrogen receptor 1                                                                                                                                     | -0.1569 | 0.0025 |
| 217193_x_at | IL8          | Interleukin 8                                                                                                                                           | -0.181  | 0.0094 |
| 217198_x_at | IGH@         | immunoglobulin heavy constant delta, immunoglobulin heavy constant gamma 1 (G1m marker), immunoglobulin heavy locus, immunoglobulin heavy variable 4-31 | -0.1848 | 0.0058 |
| 217202_s_at | GLUL         | glutamate-ammonia ligase (glutamine synthetase)                                                                                                         | -1.0653 | 0.0264 |
| 217205_at   |              |                                                                                                                                                         | -0.1881 | 0.0012 |
| 217207_s_at | BTNL3        | butyrophilin-like 3                                                                                                                                     | -0.2282 | 0.027  |
| 217217_at   | SKAP2        | Immunoglobulin epsilon chain, Src kinase associated phosphoprotein 2                                                                                    | -0.1331 | 0.0041 |
| 217219_at   | DKFZP434A062 | DKFZP434A062 protein                                                                                                                                    | -0.2758 | 0.0068 |
| 217230_at   | VIL2         | villin 2 (ezrin)                                                                                                                                        | -0.2097 | 0.0006 |
| 217232_x_at | HBB          | hemoglobin; beta                                                                                                                                        | -1.7628 | 0.0245 |
| 217233_at   |              |                                                                                                                                                         | -0.1524 | 0.023  |
| 217252_at   | SQSTM1       | sequestosome 1                                                                                                                                          | -0.1001 | 0.0362 |



|             |           |                                                                                                                                                           |         |        |
|-------------|-----------|-----------------------------------------------------------------------------------------------------------------------------------------------------------|---------|--------|
| 217263_x_at | RUNX1     | runt-related transcription factor 1 (acute myeloid leukemia 1; aml1 oncogene)                                                                             | -0.1533 | 0.004  |
| 217266_at   | LOC646672 | ribosomal protein L15, similar to ribosomal protein L15                                                                                                   | -0.3347 | 0.0322 |
| 217273_at   | LOC645399 | PRAME family member 10, similar to PRAME family member 10                                                                                                 | -0.113  | 0.0347 |
| 217283_at   |           | Homeobox protein Ogl2 (OGL12)                                                                                                                             | -0.168  | 0.0149 |
| 217286_s_at | NDRG3     | NDRG family member 3                                                                                                                                      | -0.4187 | 0.0479 |
| 217291_at   | CEACAM5   | carcinoembryonic antigen-related cell adhesion molecule 5                                                                                                 | -0.1452 | 0.0032 |
| 217303_s_at | ADRB3     | adrenergic; beta-3-; receptor                                                                                                                             | -0.1202 | 0.0376 |
| 217307_at   |           |                                                                                                                                                           | -0.1829 | 0.018  |
| 217332_at   | LOC647288 | similar to CTAGE family; member 5                                                                                                                         | -0.1206 | 0.0403 |
| 217333_at   | KRT18P44  | keratin 18 pseudogene 44                                                                                                                                  | -0.159  | 0.0189 |
| 217336_at   | LOC133569 | hypothetical LOC376693, ribosomal protein S10, ribosomal protein S10 pseudogene 3, similar to 40S ribosomal protein S10, similar to ribosomal protein S10 | -0.4466 | 0.0413 |
| 217340_at   | LOC645452 | similar to 60S ribosomal protein L21                                                                                                                      | -0.2523 | 0.0004 |
| 217341_at   |           |                                                                                                                                                           | -0.2174 | 0.0454 |
| 217347_at   | LOC643653 | similar to 60S ribosomal protein L35                                                                                                                      | -0.3369 | 0.0083 |
| 217350_at   | KRT19P2   | keratin 19 pseudogene 2                                                                                                                                   | -0.1134 | 0.022  |
| 217358_at   | DNAJC16   | DnaJ (Hsp40) homolog; subfamily C; member 16                                                                                                              | -0.1674 | 0.0158 |
| 217361_at   |           |                                                                                                                                                           | -0.1237 | 0.0394 |
| 217362_x_at | HLA-DRB6  | major histocompatibility complex; class II; DR beta 6 (pseudogene)                                                                                        | -0.8866 | 0.0032 |
| 217363_x_at |           |                                                                                                                                                           | -0.3178 | 0      |
| 217367_s_at | ZHX3      | zinc fingers and homeoboxes 3                                                                                                                             | -0.5506 | 0.0382 |
| 217377_x_at | NTRK3     | neurotrophic tyrosine kinase; receptor; type 3                                                                                                            | -0.3524 | 0.0013 |
| 217379_at   | LOC442171 | similar to ribosomal protein L10                                                                                                                          | -0.4023 | 0.0027 |
| 217388_s_at | KYNU      | kynureninase (L-kynurenine hydrolase)                                                                                                                     | -1.9463 | 0.0003 |
| 217395_at   | MT4       | metallothionein 4                                                                                                                                         | -0.1279 | 0.0196 |
| 217397_at   | TRA@      | T cell receptor V alpha gene segment V-alpha-w24; clone IGRa02, T cell receptor alpha locus                                                               | -0.1237 | 0.0304 |
| 217408_at   | MRPS18B   | mitochondrial ribosomal protein S18B                                                                                                                      | -0.2351 | 0.0404 |
| 217412_at   |           | Rearranged T-cell receptor alpha chain mRNA; variable region                                                                                              | -0.1053 | 0.0075 |
| 217413_s_at | TNXB      | tenascin XB                                                                                                                                               | -0.1393 | 0.0387 |
| 217414_x_at | HBA1      | hemoglobin; alpha 1, hemoglobin; alpha 2                                                                                                                  | -1.371  | 0.0325 |
| 217421_at   | PIWIL2    | piwi-like 2 (Drosophila)                                                                                                                                  | -0.159  | 0.0014 |
| 217425_at   | MC2R      | melanocortin 2 receptor (adrenocorticotrophic hormone)                                                                                                    | -1.1314 | 0      |
| 217433_at   | TACC1     | transforming; acidic coiled-coil containing protein 1                                                                                                     | -0.127  | 0.0433 |
| 217434_at   | MC2R      | melanocortin 2 receptor (adrenocorticotrophic hormone)                                                                                                    | -2.6817 | 0.0019 |

|             |           |                                                                                     |         |        |
|-------------|-----------|-------------------------------------------------------------------------------------|---------|--------|
| 217449_at   |           | MRNA; cDNA DKFZp434D1516 (from clone DKFZp434D1516)                                 | -0.1138 | 0.0394 |
| 217452_s_at | B3GALT2   | UDP-Gal:betaGlcNAc beta 1;3-galactosyltransferase; polypeptide 2                    | -0.3813 | 0.0036 |
| 217454_at   |           |                                                                                     | -0.1634 | 0.0295 |
| 217459_at   |           | MRNA; cDNA DKFZp434L1016 (from clone DKFZp434L1016)                                 | -0.1701 | 0.0075 |
| 217464_at   |           |                                                                                     | -0.2217 | 0.0027 |
| 217473_x_at | SLC11A1   | solute carrier family 11 (proton-coupled divalent metal ion transporters); member 1 | -0.2247 | 0.0255 |
| 217478_s_at | HLA-DMA   | major histocompatibility complex; class II; DM alpha                                | -2.5251 | 0.0009 |
| 217493_x_at | NCR2      | natural cytotoxicity triggering receptor 2                                          | -0.1495 | 0.0464 |
| 217499_x_at | OR7E37P   | olfactory receptor; family 7; subfamily E; member 37 pseudogene                     | -0.9575 | 0.0385 |
| 217504_at   | ABCA6     | ATP-binding cassette; sub-family A (ABC1); member 6                                 | -1.3988 | 0      |
| 217507_at   | SLC11A1   | solute carrier family 11 (proton-coupled divalent metal ion transporters); member 1 | -0.3759 | 0.0059 |
| 217513_at   | C17orf60  | chromosome 17 open reading frame 60                                                 | -0.198  | 0.0352 |
| 217515_s_at | CACNA1S   | calcium channel; voltage-dependent; L type; alpha 1S subunit                        | -0.2368 | 0.0031 |
| 217525_at   | OLFML1    | olfactomedin-like 1                                                                 | -1.1436 | 0      |
| 217532_x_at |           | Transcribed locus                                                                   | -0.31   | 0.0002 |
| 217546_at   | MT1M      | metallothionein 1M                                                                  | -3.5843 | 0      |
| 217559_at   | RPL10L    | ribosomal protein L10-like                                                          | -0.3058 | 0.0006 |
| 217570_x_at |           |                                                                                     | -0.1575 | 0.0045 |
| 217582_at   |           |                                                                                     | -0.2059 | 0.0065 |
| 217584_at   | NPC1      | Niemann-Pick disease; type C1                                                       | -2.6289 | 0      |
| 217590_s_at | TRPA1     | transient receptor potential cation channel; subfamily A; member 1                  | -0.1248 | 0.0082 |
| 217597_x_at | RAB40B    | RAB40B; member RAS oncogene family                                                  | -0.2445 | 0.0119 |
| 217600_at   | SCUBE3    | Signal peptide; CUB domain; EGF-like 3                                              | -0.2324 | 0.0007 |
| 217604_at   |           | Transcribed locus                                                                   | -0.6926 | 0.0361 |
| 217614_at   |           | Transcribed locus                                                                   | -0.1429 | 0.0135 |
| 217616_at   |           | Transcribed locus                                                                   | -0.1353 | 0.0205 |
| 217622_at   | RHBDD3    | rhomboid domain containing 3                                                        | -0.293  | 0.025  |
| 217625_x_at |           | Homo sapiens; clone IMAGE:3851018; mRNA                                             | -0.4894 | 0.046  |
| 217629_at   |           | Transcribed locus                                                                   | -0.137  | 0.0122 |
| 217631_at   | GTPBP4    | GTP binding protein 4                                                               | -1.1499 | 0      |
| 217633_at   | URB1      | URB1 ribosome biogenesis 1 homolog (S. cerevisiae)                                  | -0.2245 | 0.0006 |
| 217634_at   | LOC645954 | similar to supervillin isoform 2                                                    | -0.1443 | 0.0159 |
| 217641_at   | GPR135    | G protein-coupled receptor 135                                                      | -0.4884 | 0.0012 |
| 217645_at   | C14orf112 | chromosome 14 open reading frame 112                                                | -1.8957 | 0      |

|             |           |                                                                                                                                                                                                     |         |        |
|-------------|-----------|-----------------------------------------------------------------------------------------------------------------------------------------------------------------------------------------------------|---------|--------|
| 217647_at   |           | CDNA FLJ40920 fis; clone UTERU2005905                                                                                                                                                               | -0.1211 | 0.0495 |
| 217649_at   | LOC732229 | Similar to Zinc finger A20 domain-containing protein 2 (Zinc finger protein 216)                                                                                                                    | -1.6808 | 0.0002 |
| 217652_at   | KIAA0892  | KIAA0892                                                                                                                                                                                            | -0.105  | 0.0019 |
| 217670_at   | RPLP2     | Ribosomal protein; large; P2                                                                                                                                                                        | -0.2495 | 0.0001 |
| 217672_x_at |           |                                                                                                                                                                                                     | -0.2009 | 0.0115 |
| 217674_at   |           | Transcribed locus                                                                                                                                                                                   | -0.1464 | 0.0115 |
| 217676_at   |           | Transcribed locus; moderately similar to XP_001090216.1 ATP synthase; H <sup>+</sup> transporting; mitochondrial F1 complex; O subunit (oligomycin sensitivity conferring protein) [Macaca mulatta] | -0.1886 | 0.0034 |
| 217681_at   | LOC647836 | similar to wingless-type MMTV integration site family; member 7B precursor, wingless-type MMTV integration site family; member 7B                                                                   | -0.1894 | 0.0204 |
| 217683_at   | HBE1      | Hemoglobin; epsilon 1                                                                                                                                                                               | -0.1167 | 0.0001 |
| 217685_at   | SLC16A3   | Solute carrier family 16; member 3 (monocarboxylic acid transporter 4)                                                                                                                              | -0.1752 | 0.0069 |
| 217687_at   | ADCY2     | adenylate cyclase 2 (brain)                                                                                                                                                                         | -0.1754 | 0.003  |
| 217689_at   | PTPN1     | Protein tyrosine phosphatase; non-receptor type 1                                                                                                                                                   | -0.1478 | 0.0372 |
| 217702_at   | IL27RA    | interleukin 27 receptor; alpha                                                                                                                                                                      | -0.1818 | 0.0104 |
| 217707_x_at | SMARCA2   | SWI/SNF related; matrix associated; actin dependent regulator of chromatin; subfamily a; member 2                                                                                                   | -0.8026 | 0.0044 |
| 217708_x_at |           | Transcribed locus                                                                                                                                                                                   | -0.1708 | 0.044  |
| 217710_x_at | ITPK1     | inositol 1;3;4-triphosphate 5/6 kinase                                                                                                                                                              | -0.1766 | 0.0286 |
| 217719_at   | EIF3EIP   | eukaryotic translation initiation factor 3; subunit E interacting protein                                                                                                                           | -0.5557 | 0.0009 |
| 217721_at   |           | Full-length cDNA clone CS0DB003YD12 of Neuroblastoma Cot 10-normalized of Homo sapiens (human)                                                                                                      | -0.2236 | 0.0271 |
| 217723_x_at |           |                                                                                                                                                                                                     | -0.1635 | 0.0409 |
| 217728_at   | S100A6    | S100 calcium binding protein A6                                                                                                                                                                     | -1.8237 | 0.0017 |
| 217730_at   | TMBIM1    | transmembrane BAX inhibitor motif containing 1                                                                                                                                                      | -1.4268 | 0.0003 |
| 217731_s_at | ITM2B     | integral membrane protein 2B                                                                                                                                                                        | -0.2538 | 0.0243 |
| 217732_s_at | ITM2B     | integral membrane protein 2B                                                                                                                                                                        | -0.3462 | 0.0032 |
| 217734_s_at | WDR6      | WD repeat domain 6                                                                                                                                                                                  | -0.726  | 0.0143 |
| 217738_at   | PBEF1     | pre-B-cell colony enhancing factor 1                                                                                                                                                                | -0.53   | 0.033  |
| 217739_s_at | PBEF1     | pre-B-cell colony enhancing factor 1                                                                                                                                                                | -0.8235 | 0.0015 |
| 217741_s_at | ZFAND5    | zinc finger; AN1-type domain 5                                                                                                                                                                      | -1.291  | 0      |
| 217747_s_at | RPS9      | ribosomal protein S9                                                                                                                                                                                | -0.323  | 0.0075 |
| 217757_at   | A2M       | alpha-2-macroglobulin                                                                                                                                                                               | -0.6772 | 0.0079 |
| 217762_s_at | RAB31     | RAB31; member RAS oncogene family                                                                                                                                                                   | -0.8607 | 0.0113 |

|             |           |                                                                                     |         |        |
|-------------|-----------|-------------------------------------------------------------------------------------|---------|--------|
| 217763_s_at | RAB31     | RAB31; member RAS oncogene family                                                   | -0.9226 | 0.0229 |
| 217764_s_at | RAB31     | RAB31; member RAS oncogene family                                                   | -1.0361 | 0.003  |
| 217766_s_at | TMEM50A   | transmembrane protein 50A                                                           | -0.9233 | 0.0021 |
| 217767_at   | LOC653879 | similar to Complement C3 precursor                                                  | -3.3996 | 0.0017 |
| 217771_at   | GOLM1     | golgi membrane protein 1                                                            | -1.0855 | 0.0044 |
| 217774_s_at | HSPC152   | hypothetical protein HSPC152                                                        | -0.1753 | 0.0452 |
| 217779_s_at | PNRC2     | proline-rich nuclear receptor coactivator 2                                         | -0.4363 | 0.019  |
| 217783_s_at | YPEL5     | yippee-like 5 (Drosophila)                                                          | -0.5184 | 0.0015 |
| 217797_at   | UFC1      | ubiquitin-fold modifier conjugating enzyme 1                                        | -0.5455 | 0.0001 |
| 217806_s_at | POLDIP2   | polymerase (DNA-directed); delta interacting protein 2                              | -0.7885 | 0.0001 |
| 217807_s_at | GLTSCR2   | glioma tumor suppressor candidate region gene 2                                     | -0.3087 | 0.0115 |
| 217817_at   | ARPC4     | actin related protein 2/3 complex; subunit 4; 20kDa                                 | -0.3681 | 0.0427 |
| 217824_at   | UBE2J1    | ubiquitin-conjugating enzyme E2; J1 (UBC6 homolog; yeast)                           | -1.2814 | 0      |
| 217825_s_at | UBE2J1    | ubiquitin-conjugating enzyme E2; J1 (UBC6 homolog; yeast)                           | -1.1572 | 0      |
| 217830_s_at | NSFL1C    | NSFL1 (p97) cofactor (p47)                                                          | -0.8828 | 0.001  |
| 217831_s_at | NSFL1C    | NSFL1 (p97) cofactor (p47)                                                          | -0.4851 | 0.0093 |
| 217837_s_at | VPS24     | vacuolar protein sorting 24 homolog (S. cerevisiae)                                 | -0.4367 | 0.006  |
| 217838_s_at | EVL       | Enah/Vasp-like                                                                      | -0.7364 | 0.0173 |
| 217843_s_at | MED4      | mediator complex subunit 4                                                          | -0.5145 | 0.0279 |
| 217844_at   | CTDSP1    | CTD (carboxy-terminal domain; RNA polymerase II; polypeptide A) small phosphatase 1 | -0.3567 | 0.0258 |
| 217845_x_at | HIGD1A    | HIG1 domain family; member 1A                                                       | -0.3814 | 0.0134 |
| 217848_s_at | PPA1      | pyrophosphatase (inorganic) 1                                                       | -0.5851 | 0.0046 |
| 217850_at   | GNL3      | guanine nucleotide binding protein-like 3 (nucleolar)                               | -0.4103 | 0.0337 |
| 217853_at   | TNS3      | tensin 3                                                                            | -0.8585 | 0.0467 |
| 217868_s_at | METTL9    | methyltransferase like 9                                                            | -0.4637 | 0.0088 |
| 217874_at   | SUCLG1    | succinate-CoA ligase; GDP-forming; alpha subunit                                    | -0.4095 | 0.0038 |
| 217875_s_at | TMEPAI    | transmembrane; prostate androgen induced RNA                                        | -2.021  | 0      |
| 217886_at   | EPS15     | epidermal growth factor receptor pathway substrate 15                               | -1.1077 | 0.0001 |
| 217887_s_at | EPS15     | epidermal growth factor receptor pathway substrate 15                               | -0.8297 | 0.0006 |
| 217889_s_at | CYBRD1    | cytochrome b reductase 1                                                            | -2.5295 | 0      |
| 217890_s_at | PARVA     | parvin; alpha                                                                       | -1.9599 | 0      |
| 217892_s_at | LIMA1     | LIM domain and actin binding 1                                                      | -1.2615 | 0.0086 |
| 217894_at   | KCTD3     | potassium channel tetramerisation domain containing 3                               | -0.7393 | 0.0112 |
| 217908_s_at | IQWD1     | IQ motif and WD repeats 1                                                           | -0.9578 | 0.0006 |
| 217922_at   | MAN1A2    | mannosidase; alpha; class 1A; member 2                                              | -0.9257 | 0.0001 |

|             |          |                                                                                      |         |        |
|-------------|----------|--------------------------------------------------------------------------------------|---------|--------|
| 217923_at   | PEF1     | penta-EF-hand domain containing 1                                                    | -0.4006 | 0.0237 |
| 217932_at   | MRPS7    | mitochondrial ribosomal protein S7                                                   | -0.7242 | 0.0048 |
| 217955_at   | BCL2L13  | BCL2-like 13 (apoptosis facilitator)                                                 | -0.8168 | 0.0013 |
| 217958_at   | TRAPPC4  | trafficking protein particle complex 4                                               | -0.3355 | 0.0319 |
| 217964_at   | TTC19    | tetratricopeptide repeat domain 19                                                   | -0.7237 | 0      |
| 217969_at   | C11orf2  | chromosome 11 open reading frame2                                                    | -1.2013 | 0.0001 |
| 217980_s_at | MRPL16   | mitochondrial ribosomal protein L16                                                  | -0.8333 | 0      |
| 217987_at   | ASNSD1   | asparagine synthetase domain containing 1                                            | -0.4553 | 0.0005 |
| 217995_at   | SQRDL    | sulfide quinone reductase-like (yeast)                                               | -2.0792 | 0.0002 |
| 217996_at   | PHLDA1   | pleckstrin homology-like domain; family A; member 1                                  | -2.0997 | 0.01   |
| 218004_at   | BSDC1    | BSD domain containing 1                                                              | -0.5145 | 0.0053 |
| 218016_s_at | POLR3E   | polymerase (RNA) III (DNA directed) polypeptide E (80kD)                             | -0.6888 | 0.006  |
| 218026_at   | CCDC56   | coiled-coil domain containing 56                                                     | -0.4256 | 0.0039 |
| 218031_s_at | FOXN3    | forkhead box N3                                                                      | -0.9807 | 0.0016 |
| 218032_at   | SNN      | stannin                                                                              | -0.7888 | 0.0034 |
| 218035_s_at | FLJ20273 | RNA-binding protein                                                                  | -0.6209 | 0.0319 |
| 218041_x_at | SLC38A2  | solute carrier family 38; member 2                                                   | -0.3623 | 0.0382 |
| 218043_s_at | AZI2     | 5-azacytidine induced 2                                                              | -0.56   | 0.0003 |
| 218044_x_at | PTMS     | parathymosin                                                                         | -0.1951 | 0.0112 |
| 218047_at   | OSBPL9   | oxysterol binding protein-like 9                                                     | -0.5632 | 0.0055 |
| 218050_at   | UFM1     | ubiquitin-fold modifier 1                                                            | -0.4537 | 0.0128 |
| 218062_x_at | CDC42EP4 | CDC42 effector protein (Rho GTPase binding) 4                                        | -1.601  | 0      |
| 218065_s_at | TMEM9B   | TMEM9 domain family; member B                                                        | -0.5395 | 0.0021 |
| 218072_at   | COMMD9   | COMM domain containing 9                                                             | -0.6504 | 0.0005 |
| 218077_s_at | ZDHHC3   | zinc finger; DHHC-type containing 3                                                  | -0.5632 | 0.0015 |
| 218078_s_at | ZDHHC3   | zinc finger; DHHC-type containing 3                                                  | -1.2043 | 0      |
| 218087_s_at | SORBS1   | sorbin and SH3 domain containing 1                                                   | -2.618  | 0      |
| 218091_at   | HRB      | HIV-1 Rev binding protein                                                            | -0.759  | 0.002  |
| 218098_at   | ARFGEF2  | ADP-ribosylation factor guanine nucleotide-exchange factor 2 (brefeldin A-inhibited) | -0.4949 | 0.0019 |
| 218101_s_at | NDUFC2   | NADH dehydrogenase (ubiquinone) 1; subcomplex unknown; 2; 14.5kDa                    | -0.4664 | 0      |
| 218103_at   | FTSJ3    | FtsJ homolog 3 (E. coli)                                                             | -0.5038 | 0.0132 |
| 218109_s_at | MFSD1    | major facilitator superfamily domain containing 1                                    | -0.3491 | 0.0405 |
| 218124_at   | RETSAT   | retinol saturase (all-trans-retinol 13;14-reductase)                                 | -1.4313 | 0      |
| 218150_at   | ARL5A    | ADP-ribosylation factor-like 5A                                                      | -0.4995 | 0.0002 |
| 218153_at   | CARS2    | cysteinyI-tRNA synthetase 2; mitochondrial (putative)                                | -0.7567 | 0.0078 |
| 218157_x_at | CDC42SE1 | CDC42 small effector 1                                                               | -0.4689 | 0.0006 |

|             |           |                                                                                                                                     |         |        |
|-------------|-----------|-------------------------------------------------------------------------------------------------------------------------------------|---------|--------|
| 218162_at   | OLFML3    | olfactomedin-like 3                                                                                                                 | -4.7311 | 0      |
| 218164_at   | SPATA20   | spermatogenesis associated 20                                                                                                       | -1.5534 | 0.0011 |
| 218166_s_at | RSF1      | remodeling and spacing factor 1                                                                                                     | -0.6483 | 0.0249 |
| 218168_s_at | CABC1     | chaperone; ABC1 activity of bc1 complex homolog (S. pombe)                                                                          | -1.2014 | 0.0021 |
| 218177_at   | CHMP1B    | chromatin modifying protein 1B                                                                                                      | -1.1149 | 0.0004 |
| 218178_s_at | CHMP1B    | chromatin modifying protein 1B                                                                                                      | -0.9247 | 0.0005 |
| 218182_s_at | CLDN1     | claudin 1                                                                                                                           | -1.0215 | 0.0354 |
| 218187_s_at | C8orf33   | chromosome 8 open reading frame 33                                                                                                  | -0.6034 | 0.0207 |
| 218190_s_at | UCRC      | ubiquinol-cytochrome c reductase complex (7.2 kD)                                                                                   | -0.2442 | 0.0486 |
| 218191_s_at | LMBRD1    | LMBR1 domain containing 1                                                                                                           | -0.8974 | 0      |
| 218202_x_at | MRPL44    | mitochondrial ribosomal protein L44                                                                                                 | -0.361  | 0.0023 |
| 218203_at   | ALG5      | asparagine-linked glycosylation 5 homolog (S. cerevisiae; dolichyl-phosphate beta-glucosyltransferase)                              | -0.6377 | 0.0089 |
| 218204_s_at | FYCO1     | FYVE and coiled-coil domain containing 1                                                                                            | -1.3008 | 0      |
| 218208_at   | PQLC1     | PQ loop repeat containing 1                                                                                                         | -0.5943 | 0.0009 |
| 218213_s_at | C11orf10  | chromosome 11 open reading frame 10                                                                                                 | -0.2249 | 0.0061 |
| 218217_at   | SCPEP1    | serine carboxypeptidase 1                                                                                                           | -1.057  | 0      |
| 218221_at   | ARNT      | aryl hydrocarbon receptor nuclear translocator                                                                                      | -0.9663 | 0.0003 |
| 218223_s_at | PLEKHO1   | pleckstrin homology domain containing; family O member 1                                                                            | -2.0304 | 0      |
| 218224_at   | PNMA1     | paraneoplastic antigen MA1                                                                                                          | -0.4769 | 0.0337 |
| 218226_s_at | LOC727762 | NADH dehydrogenase (ubiquinone) 1 beta subcomplex; 4; 15kDa, similar to NADH dehydrogenase (ubiquinone) 1 beta subcomplex; 4; 15kDa | -0.4194 | 0      |
| 218232_at   | C1QA      | complement component 1; q subcomponent; A chain                                                                                     | -2.57   | 0      |
| 218233_s_at | C6orf49   | chromosome 6 open reading frame 49                                                                                                  | -0.3247 | 0.0027 |
| 218235_s_at | UTP11L    | UTP11-like; U3 small nucleolar ribonucleoprotein; (yeast)                                                                           | -1.2203 | 0.0001 |
| 218238_at   | GTPBP4    | GTP binding protein 4                                                                                                               | -0.9187 | 0.0155 |
| 218239_s_at | GTPBP4    | GTP binding protein 4                                                                                                               | -0.7549 | 0.0012 |
| 218247_s_at | MEX3C     | mex-3 homolog C (C. elegans)                                                                                                        | -0.4719 | 0.0264 |
| 218253_s_at | LGTN      | ligatin                                                                                                                             | -1.5166 | 0      |
| 218265_at   | SECISBP2  | SECIS binding protein 2                                                                                                             | -0.3686 | 0.0246 |
| 218267_at   | CINP      | cyclin-dependent kinase 2-interacting protein                                                                                       | -0.2779 | 0.0195 |
| 218270_at   | MRPL24    | mitochondrial ribosomal protein L24                                                                                                 | -0.5913 | 0      |
| 218272_at   | FLJ20699  | hypothetical protein FLJ20699                                                                                                       | -0.8594 | 0.0023 |
| 218273_s_at | PPM2C     | protein phosphatase 2C; magnesium-dependent; catalytic subunit                                                                      | -1.452  | 0.009  |
| 218281_at   | MRPL48    | mitochondrial ribosomal protein L48                                                                                                 | -0.8925 | 0.0003 |

|             |           |                                                                                           |         |        |
|-------------|-----------|-------------------------------------------------------------------------------------------|---------|--------|
| 218285_s_at | BDH2      | 3-hydroxybutyrate dehydrogenase; type 2                                                   | -0.9012 | 0.0076 |
| 218288_s_at | CCDC90B   | coiled-coil domain containing 90B                                                         | -0.8374 | 0      |
| 218289_s_at | UBE1DC1   | ubiquitin-activating enzyme E1-domain containing 1                                        | -0.6477 | 0.016  |
| 218297_at   | C10orf97  | chromosome 10 open reading frame 97                                                       | -0.6938 | 0.0001 |
| 218301_at   | RNPEPL1   | arginyl aminopeptidase (aminopeptidase B)-like 1                                          | -0.4018 | 0.0115 |
| 218307_at   | RSAD1     | radical S-adenosyl methionine domain containing 1                                         | -0.7534 | 0.0054 |
| 218310_at   | RABGEF1   | RAB guanine nucleotide exchange factor (GEF) 1                                            | -0.4704 | 0.0011 |
| 218319_at   | PELI1     | pellino homolog 1 (Drosophila)                                                            | -0.9524 | 0.0058 |
| 218322_s_at | ACSL5     | acyl-CoA synthetase long-chain family member 5                                            | -0.8417 | 0.0006 |
| 218326_s_at | LGR4      | leucine-rich repeat-containing G protein-coupled receptor 4                               | -1.4037 | 0.001  |
| 218333_at   | DERL2     | Der1-like domain family; member 2                                                         | -0.5421 | 0      |
| 218334_at   | THOC7     | THO complex 7 homolog (Drosophila)                                                        | -0.5489 | 0.0001 |
| 218342_s_at | ERMP1     | endoplasmic reticulum metalloproteinase 1                                                 | -2.1789 | 0.0001 |
| 218347_at   | TYW1      | tRNA-yW synthesizing protein 1 homolog (S. cerevisiae)                                    | -0.7109 | 0.0064 |
| 218352_at   | RCBTB1    | regulator of chromosome condensation (RCC1) and BTB (POZ) domain containing protein 1     | -0.7959 | 0.0138 |
| 218354_at   | TRAPPC2L  | trafficking protein particle complex 2-like                                               | -0.5498 | 0.0374 |
| 218358_at   | CRELD2    | cysteine-rich with EGF-like domains 2                                                     | -0.5665 | 0.0419 |
| 218360_at   | RAB22A    | RAB22A; member RAS oncogene family                                                        | -0.5256 | 0.0397 |
| 218379_at   | RBM7      | RNA binding motif protein 7                                                               | -0.8639 | 0.0183 |
| 218383_at   | C14orf94  | chromosome 14 open reading frame 94                                                       | -0.6883 | 0.0498 |
| 218391_at   | SNF8      | SNF8; ESCRT-II complex subunit; homolog (S. cerevisiae)                                   | -0.3991 | 0.0499 |
| 218406_x_at | NENF      | neuron derived neurotrophic factor                                                        | -0.1817 | 0.0314 |
| 218408_at   | TIMM10    | translocase of inner mitochondrial membrane 10 homolog (yeast)                            | -0.4869 | 0.022  |
| 218418_s_at | ANKRD25   | ankyrin repeat domain 25                                                                  | -0.6317 | 0.0154 |
| 218419_s_at | TMUB2     | transmembrane and ubiquitin-like domain containing 2                                      | -0.5116 | 0.0004 |
| 218421_at   | CERK      | ceramide kinase                                                                           | -2.6166 | 0      |
| 218440_at   | MCCC1     | methylcrotonoyl-Coenzyme A carboxylase 1 (alpha)                                          | -0.8029 | 0.0003 |
| 218443_s_at | DAZAP1    | DAZ associated protein 1                                                                  | -1.048  | 0      |
| 218444_at   | ALG12     | asparagine-linked glycosylation 12 homolog (S. cerevisiae; alpha-1,6-mannosyltransferase) | -0.3412 | 0.018  |
| 218446_s_at | FAM18B    | family with sequence similarity 18; member B                                              | -0.5588 | 0.0015 |
| 218449_at   | C4orf20   | chromosome 4 open reading frame 20                                                        | -0.3886 | 0.0293 |
| 218467_at   | TNFSF5IP1 | tumor necrosis factor superfamily; member 5-induced protein 1                             | -0.2502 | 0.0252 |

|             |          |                                                                              |         |        |
|-------------|----------|------------------------------------------------------------------------------|---------|--------|
| 218471_s_at | BBS1     | Bardet-Biedl syndrome 1                                                      | -0.5995 | 0.0111 |
| 218475_at   | HTF9C    | HpalI tiny fragments locus 9C                                                | -0.2902 | 0.034  |
| 218480_at   | AGBL5    | ATP/GTP binding protein-like 5                                               | -0.758  | 0.0094 |
| 218486_at   | KLF11    | Kruppel-like factor 11                                                       | -0.8003 | 0.0226 |
| 218487_at   | ALAD     | aminolevulinate; delta-; dehydratase                                         | -1.4584 | 0      |
| 218488_at   | EIF2B3   | eukaryotic translation initiation factor 2B; subunit 3 gamma; 58kDa          | -0.9864 | 0.0006 |
| 218489_s_at | ALAD     | aminolevulinate; delta-; dehydratase                                         | -1.2016 | 0.002  |
| 218501_at   | ARHGEF3  | Rho guanine nucleotide exchange factor (GEF) 3                               | -1.0618 | 0.0059 |
| 218503_at   | KIAA1797 | KIAA1797                                                                     | -0.8088 | 0.0021 |
| 218511_s_at | PNPO     | pyridoxamine 5'-phosphate oxidase                                            | -0.514  | 0.0082 |
| 218523_at   | LHPP     | phospholysine phosphohistidine inorganic pyrophosphate phosphatase           | -1.2707 | 0.0004 |
| 218526_s_at | RANGRF   | RAN guanine nucleotide release factor                                        | -0.6003 | 0.0053 |
| 218527_at   | APTX     | aprataxin                                                                    | -0.5331 | 0.0459 |
| 218540_at   | THTPA    | thiamine triphosphatase                                                      | -1.2264 | 0      |
| 218541_s_at | C8orf4   | chromosome 8 open reading frame 4                                            | -1.6533 | 0.0023 |
| 218544_s_at | RCL1     | RNA terminal phosphate cyclase-like 1                                        | -0.5789 | 0.0021 |
| 218552_at   | ECHDC2   | enoyl Coenzyme A hydratase domain containing 2                               | -1.1167 | 0      |
| 218560_s_at | JMJD4    | jumonji domain containing 4                                                  | -1.0397 | 0      |
| 218561_s_at | LYRM4    | LYR motif containing 4                                                       | -0.459  | 0.0378 |
| 218570_at   | KBTBD4   | kelch repeat and BTB (POZ) domain containing 4                               | -0.3041 | 0.037  |
| 218583_s_at | DCUN1D1  | DCN1; defective in cullin neddylation 1; domain containing 1 (S. cerevisiae) | -0.5363 | 0.001  |
| 218589_at   | P2RY5    | purinergic receptor P2Y; G-protein coupled; 5                                | -1.8022 | 0.0002 |
| 218591_s_at | NOL10    | nucleolar protein 10                                                         | -0.1231 | 0.0146 |
| 218592_s_at | CECR5    | cat eye syndrome chromosome region; candidate 5                              | -0.5565 | 0.0182 |
| 218600_at   | LIMD2    | LIM domain containing 2                                                      | -0.1979 | 0.0318 |
| 218605_at   | TFB2M    | transcription factor B2; mitochondrial                                       | -0.6798 | 0.0006 |
| 218612_s_at | TSSC4    | tumor suppressing subtransferable candidate 4                                | -0.2963 | 0.0162 |
| 218613_at   | PSD3     | pleckstrin and Sec7 domain containing 3                                      | -1.4342 | 0.0489 |
| 218618_s_at | FNDC3B   | fibronectin type III domain containing 3B                                    | -0.5638 | 0.0332 |
| 218620_s_at | HEMK1    | HemK methyltransferase family member 1                                       | -0.6957 | 0.0214 |
| 218623_at   | HMP19    | HMP19 protein                                                                | -0.2743 | 0.0201 |
| 218627_at   | DRAM     | damage-regulated autophagy modulator                                         | -0.9647 | 0.0162 |
| 218631_at   | AVPI1    | arginine vasopressin-induced 1                                               | -2.8172 | 0      |
| 218638_s_at | SPON2    | spondin 2; extracellular matrix protein                                      | -2.7674 | 0      |



|             |           |                                                           |         |        |
|-------------|-----------|-----------------------------------------------------------|---------|--------|
| 218644_at   | PLEK2     | pleckstrin 2                                              | -3.4462 | 0.0001 |
| 218656_s_at | LHFP      | lipoma HMGIC fusion partner                               | -1.584  | 0.002  |
| 218664_at   | MECR      | mitochondrial trans-2-enoyl-CoA reductase                 | -0.4599 | 0.0194 |
| 218665_at   | FZD4      | frizzled homolog 4 (Drosophila)                           | -1.4325 | 0.0006 |
| 218678_at   | NES       | nestin                                                    | -0.6232 | 0.03   |
| 218680_x_at | HYPK      | Huntingtin interacting protein K                          | -0.5596 | 0.0012 |
| 218684_at   | LRRC8D    | leucine rich repeat containing 8 family; member D         | -0.9284 | 0.0097 |
| 218688_at   | DAK       | dihydroxyacetone kinase 2 homolog (S. cerevisiae)         | -4.3836 | 0      |
| 218692_at   | GOLSYN    | Golgi-localized protein                                   | -1.9298 | 0.0149 |
| 218696_at   | EIF2AK3   | eukaryotic translation initiation factor 2-alpha kinase 3 | -0.7125 | 0.0001 |
| 218698_at   | APIP      | APAF1 interacting protein                                 | -0.6383 | 0.0196 |
| 218701_at   | LACTB2    | lactamase; beta 2                                         | -1.019  | 0.01   |
| 218704_at   | RNF43     | ring finger protein 43                                    | -0.9721 | 0.048  |
| 218706_s_at | GRAMD3    | GRAM domain containing 3                                  | -2.6685 | 0      |
| 218710_at   | TTC27     | tetratricopeptide repeat domain 27                        | -1.0387 | 0.0008 |
| 218730_s_at | OGN       | osteoglycin                                               | -3.2417 | 0      |
| 218732_at   | PTRH2     | peptidyl-tRNA hydrolase 2                                 | -0.8612 | 0.011  |
| 218736_s_at | PALMD     | palmdelphin                                               | -1.5047 | 0.0088 |
| 218743_at   | CHMP6     | chromatin modifying protein 6                             | -0.279  | 0.0478 |
| 218744_s_at | PACSIN3   | protein kinase C and casein kinase substrate in neurons 3 | -1.0089 | 0      |
| 218752_at   | ZMAT5     | zinc finger; matrin type 5                                | -0.4837 | 0.0284 |
| 218754_at   | NOL9      | nucleolar protein 9                                       | -0.6768 | 0.006  |
| 218756_s_at | MGC4172   | short-chain dehydrogenase/reductase                       | -0.8393 | 0.007  |
| 218760_at   | COQ6      | coenzyme Q6 homolog; monooxygenase (S. cerevisiae)        | -0.8125 | 0.0045 |
| 218765_at   | SIDT2     | SID1 transmembrane family; member 2                       | -0.4855 | 0.0068 |
| 218773_s_at | MSRB2     | methionine sulfoxide reductase B2                         | -0.5311 | 0.0019 |
| 218789_s_at | C11orf71  | chromosome 11 open reading frame 71                       | -1.1184 | 0.0063 |
| 218792_s_at | BSPRY     | B-box and SPRY domain containing                          | -0.2686 | 0.0176 |
| 218795_at   | ACP6      | acid phosphatase 6; lysophosphatidic                      | -0.8558 | 0.0205 |
| 218796_at   | C20orf42  | chromosome 20 open reading frame 42                       | -1.727  | 0.0018 |
| 218805_at   | GIMAP5    | GTPase; IMAP family member 5                              | -1.6634 | 0      |
| 218810_at   | ZC3H12A   | zinc finger CCCH-type containing 12A                      | -2.782  | 0      |
| 218814_s_at | C1orf75   | chromosome 1 open reading frame 75                        | -0.1549 | 0.0304 |
| 218818_at   | FHL3      | four and a half LIM domains 3                             | -0.3839 | 0.0002 |
| 218820_at   | C14orf132 | chromosome 14 open reading frame 132                      | -1.643  | 0.0005 |
| 218828_at   | PLSCR3    | phospholipid scramblase 3                                 | -0.3638 | 0.0257 |

|             |          |                                                                                              |         |        |
|-------------|----------|----------------------------------------------------------------------------------------------|---------|--------|
| 218831_s_at | FCGRT    | Fc fragment of IgG; receptor; transporter; alpha                                             | -2.3732 | 0      |
| 218843_at   | FNDC4    | fibronectin type III domain containing 4                                                     | -3.0786 | 0      |
| 218844_at   | FLJ20920 | hypothetical protein FLJ20920                                                                | -1.7388 | 0      |
| 218845_at   | DUSP22   | dual specificity phosphatase 22                                                              | -0.5636 | 0.0455 |
| 218853_s_at | MOSPD1   | motile sperm domain containing 1                                                             | -0.7479 | 0.0317 |
| 218854_at   | DSE      | dermatan sulfate epimerase                                                                   | -1.6332 | 0      |
| 218858_at   | DEPDC6   | DEP domain containing 6                                                                      | -2.2162 | 0.0003 |
| 218864_at   | TNS1     | tensin 1                                                                                     | -0.8429 | 0.0092 |
| 218865_at   | MOSC1    | MOCO sulphurase C-terminal domain containing 1                                               | -0.5664 | 0.0005 |
| 218872_at   | TESC     | tescalcin                                                                                    | -2.6764 | 0      |
| 218878_s_at | SIRT1    | sirtuin (silent mating type information regulation 2 homolog) 1 (S. cerevisiae)              | -2.4468 | 0      |
| 218880_at   | FOSL2    | FOS-like antigen 2                                                                           | -2.2196 | 0.0001 |
| 218881_s_at | FOSL2    | FOS-like antigen 2                                                                           | -1.8136 | 0      |
| 218901_at   | PLSCR4   | phospholipid scramblase 4                                                                    | -1.2659 | 0.0147 |
| 218915_at   | NF2      | neurofibromin 2 (bilateral acoustic neuroma)                                                 | -0.6683 | 0.0092 |
| 218935_at   | EHD3     | EH-domain containing 3                                                                       | -2.0816 | 0      |
| 218946_at   | NFU1     | NFU1 iron-sulfur cluster scaffold homolog (S. cerevisiae)                                    | -0.842  | 0      |
| 218957_s_at | PAAF1    | proteasomal ATPase-associated factor 1                                                       | -0.7191 | 0.0115 |
| 218970_s_at | CUTC     | cutC copper transporter homolog (E. coli)                                                    | -0.5978 | 0.006  |
| 218972_at   | TTC17    | tetratricopeptide repeat domain 17                                                           | -0.8481 | 0.0205 |
| 218976_at   | DNAJC12  | DnaJ (Hsp40) homolog; subfamily C; member 12                                                 | -2.4387 | 0.0011 |
| 218980_at   | FHOD3    | formin homology 2 domain containing 3                                                        | -1.2756 | 0.0239 |
| 218983_at   | C1RL     | complement component 1; r subcomponent-like                                                  | -1.5683 | 0.002  |
| 218997_at   | POLR1E   | polymerase (RNA) I polypeptide E; 53kDa                                                      | -0.6459 | 0.0174 |
| 219008_at   | C2orf43  | chromosome 2 open reading frame 43                                                           | -0.494  | 0.0177 |
| 219011_at   | PLEKHA4  | pleckstrin homology domain containing; family A (phosphoinositide binding specific) member 4 | -0.4463 | 0.0003 |
| 219015_s_at | ALG13    | asparagine-linked glycosylation 13 homolog (S. cerevisiae)                                   | -0.9506 | 0.0403 |
| 219016_at   | FASTKD5  | FAST kinase domains 5                                                                        | -0.6369 | 0.0137 |
| 219021_at   | RNF121   | ring finger protein 121                                                                      | -0.2788 | 0.0092 |
| 219044_at   | THNSL2   | threonine synthase-like 2 (S. cerevisiae)                                                    | -1.2088 | 0.0319 |
| 219046_s_at | PKNOX2   | PBX/knotted 1 homeobox 2                                                                     | -0.3746 | 0.0004 |
| 219049_at   | ChGn     | chondroitin beta1;4 N-acetylgalactosaminyltransferase                                        | -1.8035 | 0.0125 |
| 219058_x_at | TINAGL1  | tubulointerstitial nephritis antigen-like 1                                                  | -0.3842 | 0.0066 |

|             |         |                                                                |         |        |
|-------------|---------|----------------------------------------------------------------|---------|--------|
| 219059_s_at | LYVE1   | lymphatic vessel endothelial hyaluronan receptor 1             | -2.2074 | 0.0132 |
| 219070_s_at | MOSPD3  | motile sperm domain containing 3                               | -0.5762 | 0.0117 |
| 219076_s_at | PXMP2   | peroxisomal membrane protein 2; 22kDa                          | -1.1256 | 0.0011 |
| 219087_at   | ASPN    | asporin                                                        | -2.4042 | 0.0004 |
| 219093_at   | PID1    | phosphotyrosine interaction domain containing 1                | -3.0075 | 0.0001 |
| 219102_at   | RCN3    | reticulocalbin 3; EF-hand calcium binding domain               | -0.2395 | 0.0448 |
| 219104_at   | RNF141  | ring finger protein 141                                        | -1.3766 | 0      |
| 219107_at   | BCAN    | brevican                                                       | -0.2411 | 0.0051 |
| 219108_x_at | DDX27   | DEAD (Asp-Glu-Ala-Asp) box polypeptide 27                      | -0.49   | 0.0361 |
| 219115_s_at | IL20RA  | interleukin 20 receptor; alpha                                 | -1.5108 | 0.0002 |
| 219126_at   | PHF10   | PHD finger protein 10                                          | -1.7657 | 0.0001 |
| 219131_at   | UBIAD1  | UbiA prenyltransferase domain containing 1                     | -0.395  | 0.0072 |
| 219132_at   | PELI2   | pellino homolog 2 (Drosophila)                                 | -1.3222 | 0.0003 |
| 219138_at   | RPL14   | ribosomal protein L14                                          | -0.2772 | 0.0108 |
| 219140_s_at | RBP4    | retinol binding protein 4; plasma                              | -3.5531 | 0      |
| 219144_at   | DUSP26  | dual specificity phosphatase 26 (putative)                     | -0.9121 | 0      |
| 219157_at   | KLHL2   | kelch-like 2; Mayven (Drosophila)                              | -0.8936 | 0.002  |
| 219169_s_at | TFB1M   | transcription factor B1; mitochondrial                         | -0.6383 | 0.0328 |
| 219173_at   | MYO15B  | myosin XVB pseudogene                                          | -0.3933 | 0.0061 |
| 219176_at   | C2orf47 | chromosome 2 open reading frame 47                             | -0.3762 | 0.0189 |
| 219179_at   | DACT1   | dapper; antagonist of beta-catenin; homolog 1 (Xenopus laevis) | -1.3356 | 0.0102 |
| 219183_s_at | PSCD4   | pleckstrin homology; Sec7 and coiled-coil domains 4            | -0.5687 | 0.0109 |
| 219192_at   | UBAP2   | ubiquitin associated protein 2                                 | -0.71   | 0.002  |
| 219197_s_at | SCUBE2  | signal peptide; CUB domain; EGF-like 2                         | -0.5097 | 0.0001 |
| 219202_at   | RHBDP2  | rhomoid 5 homolog 2 (Drosophila)                               | -0.6495 | 0.0022 |
| 219204_s_at | SRR     | serine racemase                                                | -0.8719 | 0.0014 |
| 219205_at   | SRR     | serine racemase                                                | -1.1529 | 0.001  |
| 219213_at   | JAM2    | junctional adhesion molecule 2                                 | -2.1307 | 0.0025 |
| 219214_s_at | NT5C    | 5'; 3'-nucleotidase; cytosolic                                 | -0.4372 | 0.0014 |
| 219217_at   | NARS2   | asparaginyl-tRNA synthetase 2; mitochondrial (putative)        | -1.0602 | 0.0009 |
| 219220_x_at | MRPS22  | mitochondrial ribosomal protein S22                            | -0.5698 | 0.0002 |
| 219222_at   | RBKS    | ribokinase                                                     | -1.5839 | 0.0009 |
| 219228_at   | ZNF331  | zinc finger protein 331                                        | -3.4676 | 0      |
| 219238_at   | PIGV    | phosphatidylinositol glycan anchor biosynthesis; class V       | -0.8574 | 0.0009 |
| 219241_x_at | SSH3    | slingshot homolog 3 (Drosophila)                               | -0.3671 | 0.0035 |
| 219242_at   | CEP63   | centrosomal protein 63kDa                                      | -0.6214 | 0.0079 |
| 219243_at   | GIMAP4  | GTPase; IMAP family member 4                                   | -1.0576 | 0.0073 |

|             |           |                                                                     |         |        |
|-------------|-----------|---------------------------------------------------------------------|---------|--------|
| 219244_s_at | MRPL46    | mitochondrial ribosomal protein L46                                 | -0.8996 | 0.0063 |
| 219254_at   | FLJ22222  | hypothetical protein FLJ22222                                       | -0.3551 | 0.0364 |
| 219255_x_at | IL17RB    | interleukin 17 receptor B                                           | -0.1854 | 0.0034 |
| 219272_at   | TRIM62    | tripartite motif-containing 62                                      | -0.7244 | 0.0011 |
| 219276_x_at | C9orf82   | chromosome 9 open reading frame 82                                  | -0.6145 | 0.0136 |
| 219279_at   | DOCK10    | dedicator of cytokinesis 10                                         | -1.345  | 0.0219 |
| 219283_at   | C1GALT1C1 | C1GALT1-specific chaperone 1                                        | -0.8456 | 0.0036 |
| 219284_at   | HSPBAP1   | HSPB (heat shock 27kDa) associated protein 1                        | -1.0835 | 0.0005 |
| 219286_s_at | RBM15     | RNA binding motif protein 15                                        | -0.327  | 0.0418 |
| 219298_at   | ECHDC3    | enoyl Coenzyme A hydratase domain containing 3                      | -3.5487 | 0      |
| 219304_s_at | PDGFD     | platelet derived growth factor D                                    | -2.88   | 0.0003 |
| 219314_s_at | ZNF219    | zinc finger protein 219                                             | -0.4707 | 0.0469 |
| 219315_s_at | C16orf30  | chromosome 16 open reading frame 30                                 | -1.6704 | 0      |
| 219316_s_at | FLVCR2    | feline leukemia virus subgroup C cellular receptor family; member 2 | -2.875  | 0      |
| 219323_s_at |           |                                                                     | -0.1366 | 0.0381 |
| 219324_at   | NOL12     | TRIO and F-actin binding protein, nucleolar protein 12              | -0.9469 | 0.0003 |
| 219325_s_at | ELAC1     | elaC homolog 1 (E. coli)                                            | -0.259  | 0.0046 |
| 219329_s_at | C2orf28   | chromosome 2 open reading frame 28                                  | -0.2558 | 0.004  |
| 219331_s_at | KLHDC8A   | kelch domain containing 8A                                          | -1.2324 | 0.025  |
| 219332_at   | MICALL2   | MICAL-like 2                                                        | -1.0104 | 0.0172 |
| 219333_s_at | CAPN10    | calpain 10                                                          | -0.2493 | 0.0417 |
| 219334_s_at | OBFC2A    | oligonucleotide/oligosaccharide-binding fold containing 2A          | -0.2401 | 0.035  |
| 219336_s_at | ASCC1     | activating signal cointegrator 1 complex subunit 1                  | -1.019  | 0      |
| 219342_at   | CASD1     | CAS1 domain containing 1                                            | -0.9471 | 0.0048 |
| 219343_at   | CDC37L1   | cell division cycle 37 homolog (S. cerevisiae)-like 1               | -1.1322 | 0.0001 |
| 219348_at   | MDS032    | uncharacterized hematopoietic stem/progenitor cells protein MDS032  | -0.6166 | 0.0266 |
| 219358_s_at | CENTA2    | centaurin; alpha 2                                                  | -1.8928 | 0      |
| 219367_s_at |           | CDNA: FLJ21027 fis; clone CAE07110                                  | -0.509  | 0.0015 |
| 219370_at   | RPRM      | reprimo; TP53 dependent G2 arrest mediator candidate                | -1.9982 | 0.0055 |
| 219371_s_at | KLF2      | Kruppel-like factor 2 (lung)                                        | -1.5278 | 0.0001 |
| 219373_at   | DPM3      | dolichyl-phosphate mannosyltransferase polypeptide 3                | -0.5801 | 0.0074 |
| 219377_at   | FAM59A    | family with sequence similarity 59; member A                        | -1.7543 | 0.0003 |
| 219379_x_at | ZNF358    | zinc finger protein 358                                             | -0.464  | 0.0277 |
| 219388_at   | GRHL2     | grainyhead-like 2 (Drosophila)                                      | -0.1367 | 0.0375 |
| 219396_s_at | NEIL1     | nei endonuclease VIII-like 1 (E. coli)                              | -1.3087 | 0.0002 |
| 219397_at   | COQ10B    | coenzyme Q10 homolog B (S. cerevisiae)                              | -0.3781 | 0.0194 |

|             |           |                                                                  |         |        |
|-------------|-----------|------------------------------------------------------------------|---------|--------|
| 219398_at   | CIDEC     | cell death-inducing DFFA-like effector c                         | -0.8376 | 0.0001 |
| 219403_s_at | HPSE      | heparanase                                                       | -1.2717 | 0.0149 |
| 219404_at   | EPS8L3    | EPS8-like 3                                                      | -0.1733 | 0.0088 |
| 219413_at   | ACBD4     | acyl-Coenzyme A binding domain containing 4                      | -0.536  | 0.0003 |
| 219419_at   | C18orf22  | chromosome 18 open reading frame 22                              | -0.9484 | 0      |
| 219423_x_at | TNFRSF25  | tumor necrosis factor receptor superfamily; member 25            | -0.5869 | 0.008  |
| 219424_at   | EBI3      | Epstein-Barr virus induced gene 3                                | -0.6912 | 0.0001 |
| 219431_at   | ARHGAP10  | Rho GTPase activating protein 10                                 | -0.8011 | 0      |
| 219436_s_at | EMCN      | endomucin                                                        | -2.4203 | 0      |
| 219438_at   | FAM77C    | family with sequence similarity 77; member C                     | -2.9135 | 0      |
| 219440_at   | RAI2      | retinoic acid induced 2                                          | -2.4841 | 0      |
| 219441_s_at | LRRK1     | leucine-rich repeat kinase 1                                     | -0.3161 | 0.0025 |
| 219473_at   | GDAP2     | ganglioside induced differentiation associated protein 2         | -0.1667 | 0.03   |
| 219478_at   | WFDC1     | WAP four-disulfide core domain 1                                 | -5.1569 | 0      |
| 219480_at   | SNAI1     | snail homolog 1 (Drosophila)                                     | -0.6158 | 0.0001 |
| 219483_s_at | PORCN     | porcupine homolog (Drosophila)                                   | -1.514  | 0.0023 |
| 219488_at   | A4GALT    | alpha 1,4-galactosyltransferase (globotriaosylceramide synthase) | -0.3288 | 0.0051 |
| 219491_at   | LRFN4     | leucine rich repeat and fibronectin type III domain containing 4 | -0.4684 | 0.0319 |
| 219492_at   | CHIC2     | cysteine-rich hydrophobic domain 2                               | -0.53   | 0.0408 |
| 219500_at   | CLCF1     | cardiotrophin-like cytokine factor 1                             | -0.3335 | 0.0008 |
| 219519_s_at | SIGLEC1   | sialic acid binding Ig-like lectin 1; sialoadhesin               | -2.1598 | 0.0003 |
| 219520_s_at | WWC3      | WWC family member 3                                              | -1.0889 | 0.0008 |
| 219521_at   | B3GAT1    | beta-1,3-glucuronyltransferase 1 (glucuronosyltransferase P)     | -0.1524 | 0.0095 |
| 219525_at   | SLC47A1   | solute carrier family 47; member 1                               | -1.8239 | 0.0058 |
| 219534_x_at | CDKN1C    | cyclin-dependent kinase inhibitor 1C (p57; Kip2)                 | -3.1025 | 0      |
| 219543_at   | PBLD      | phenazine biosynthesis-like protein domain containing            | -1.4943 | 0.0002 |
| 219545_at   | KCTD14    | potassium channel tetramerisation domain containing 14           | -2.5505 | 0.0004 |
| 219547_at   | COX15     | COX15 homolog; cytochrome c oxidase assembly protein (yeast)     | -0.3783 | 0.0447 |
| 219550_at   | ROBO3     | roundabout; axon guidance receptor; homolog 3 (Drosophila)       | -0.7849 | 0      |
| 219561_at   | COPZ2     | coatamer protein complex; subunit zeta 2                         | -1.9229 | 0.0001 |
| 219563_at   | C14orf139 | chromosome 14 open reading frame 139                             | -1.5419 | 0.0037 |
| 219565_at   | CYP20A1   | cytochrome P450; family 20; subfamily A; polypeptide 1           | -0.7332 | 0.0061 |
| 219570_at   | C20orf23  | chromosome 20 open reading frame 23                              | -1.1539 | 0.0003 |
| 219574_at   |           | 1-Mar membrane-associated ring finger (C3HC4) 1                  | -0.7811 | 0.0396 |
| 219579_at   | RAB3IL1   | RAB3A interacting protein (rabin3)-like 1                        | -0.2559 | 0.0465 |

|             |          |                                                                                     |         |        |
|-------------|----------|-------------------------------------------------------------------------------------|---------|--------|
| 219582_at   | OGFRL1   | opioid growth factor receptor-like 1                                                | -0.5026 | 0.0327 |
| 219587_at   | TTC12    | tetratricopeptide repeat domain 12                                                  | -0.4986 | 0.0206 |
| 219597_s_at | DUOX1    | dual oxidase 1                                                                      | -2.325  | 0      |
| 219600_s_at | TMEM50B  | transmembrane protein 50B                                                           | -0.8378 | 0.0394 |
| 219603_s_at | ZNF226   | zinc finger protein 226                                                             | -0.7091 | 0.0162 |
| 219607_s_at | MS4A4A   | membrane-spanning 4-domains; subfamily A; member 4                                  | -3.0925 | 0.0001 |
| 219609_at   | WDR25    | WD repeat domain 25                                                                 | -0.4025 | 0.0002 |
| 219610_at   | RGNEF    | Rho-guanine nucleotide exchange factor                                              | -2.0261 | 0      |
| 219615_s_at | KCNK5    | potassium channel; subfamily K; member 5                                            | -2.0334 | 0      |
| 219620_x_at | C9orf167 | chromosome 9 open reading frame 167                                                 | -0.3427 | 0.0015 |
| 219622_at   | RAB20    | RAB20; member RAS oncogene family                                                   | -2.599  | 0      |
| 219636_s_at | ARMC9    | armadillo repeat containing 9                                                       | -0.7255 | 0      |
| 219637_at   | ARMC9    | armadillo repeat containing 9                                                       | -1.5364 | 0.0001 |
| 219654_at   | PTPLA    | protein tyrosine phosphatase-like (proline instead of catalytic arginine); member A | -1.4222 | 0.0036 |
| 219655_at   | C7orf10  | chromosome 7 open reading frame 10                                                  | -2.8292 | 0      |
| 219656_at   | PCDH12   | protocadherin 12                                                                    | -0.8031 | 0.0001 |
| 219659_at   | ATP8A2   | ATPase; aminophospholipid transporter-like; Class I; type 8A; member 2              | -0.5534 | 0.0009 |
| 219660_s_at | ATP8A2   | ATPase; aminophospholipid transporter-like; Class I; type 8A; member 2              | -0.2436 | 0.0053 |
| 219666_at   | MS4A6A   | membrane-spanning 4-domains; subfamily A; member 6A                                 | -3.3321 | 0      |
| 219669_at   | CD177    | CD177 molecule                                                                      | -0.163  | 0.0385 |
| 219680_at   | NLRX1    | NLR family member X1                                                                | -0.7189 | 0      |
| 219687_at   | HHAT     | hedgehog acyltransferase                                                            | -0.6942 | 0.0001 |
| 219704_at   | YBX2     | Y box binding protein 2                                                             | -0.2085 | 0.0392 |
| 219713_at   | CARKL    | carbohydrate kinase-like                                                            | -0.5751 | 0      |
| 219716_at   | APOL6    | apolipoprotein L; 6                                                                 | -0.7081 | 0.0062 |
| 219718_at   | FLJ10986 | hypothetical protein FLJ10986                                                       | -0.8634 | 0.0008 |
| 219734_at   | SIDT1    | SID1 transmembrane family; member 1                                                 | -0.4759 | 0.0111 |
| 219737_s_at | PCDH9    | protocadherin 9                                                                     | -1.5024 | 0.0083 |
| 219738_s_at | PCDH9    | protocadherin 9                                                                     | -0.6453 | 0.0248 |
| 219741_x_at | ZNF552   | zinc finger protein 552                                                             | -0.3024 | 0.0044 |
| 219761_at   | CLEC1A   | C-type lectin domain family 1; member A                                             | -0.413  | 0.0101 |
| 219771_at   | TBC1D8B  | TBC1 domain family; member 8B (with GRAM domain)                                    | -1.233  | 0.0022 |
| 219776_s_at |          |                                                                                     | -0.1651 | 0.0418 |
| 219777_at   | GIMAP6   | GTPase; IMAP family member 6                                                        | -1.7754 | 0.0002 |
| 219778_at   | ZFPM2    | zinc finger protein; multitype 2                                                    | -1.4885 | 0.0175 |

|             |           |                                                                     |         |        |
|-------------|-----------|---------------------------------------------------------------------|---------|--------|
| 219791_s_at | NBLA00301 | putative protein product of Nbla00301                               | -0.6618 | 0.0078 |
| 219798_s_at | MEPCE     | methylphosphate capping enzyme                                      | -1.0518 | 0.0003 |
| 219806_s_at | C11orf75  | chromosome 11 open reading frame 75                                 | -1.2286 | 0.02   |
| 219815_at   | GAL3ST4   | galactose-3-O-sulfotransferase 4                                    | -0.419  | 0.0093 |
| 219839_x_at | TCL6      | T-cell leukemia/lymphoma 6                                          | -0.1673 | 0.0254 |
| 219847_at   | HDAC11    | histone deacetylase 11                                              | -0.2597 | 0.0028 |
| 219859_at   | CLEC4E    | C-type lectin domain family 4; member E                             | -0.1904 | 0.0002 |
| 219860_at   | LY6G5C    | lymphocyte antigen 6 complex; locus G5C                             | -0.1468 | 0.0163 |
| 219866_at   | CLIC5     | chloride intracellular channel 5                                    | -0.2289 | 0.0208 |
| 219873_at   | COLEC11   | collectin sub-family member 11                                      | -2.6301 | 0      |
| 219896_at   | DRD1IP    | dopamine receptor D1 interacting protein                            | -0.2421 | 0.0083 |
| 219902_at   | BHMT2     | betaine-homocysteine methyltransferase 2                            | -1.9087 | 0.0024 |
| 219912_s_at |           |                                                                     | -0.1263 | 0.0324 |
| 219920_s_at | GMPPB     | GDP-mannose pyrophosphorylase B                                     | -1.0449 | 0.0016 |
| 219932_at   | SLC27A6   | solute carrier family 27 (fatty acid transporter); member 6         | -4.0209 | 0      |
| 219934_s_at | SULT1E1   | sulfotransferase family 1E; estrogen-preferring; member 1           | -1.0532 | 0      |
| 219939_s_at | CSDE1     | cold shock domain containing E1; RNA-binding                        | -0.4119 | 0.0019 |
| 219943_s_at | FLJ11850  | hypothetical protein FLJ11850                                       | -0.1469 | 0.0143 |
| 219952_s_at | MCOLN1    | mucolipin 1                                                         | -0.6734 | 0.0285 |
| 219955_at   | L1TD1     | LINE-1 type transposase domain containing 1                         | -0.145  | 0.001  |
| 219959_at   | MOCOS     | molybdenum cofactor sulfurase                                       | -1.7891 | 0.0052 |
| 219970_at   | GIPC2     | GIPC PDZ domain containing family; member 2                         | -4.1034 | 0      |
| 219973_at   | ARSJ      | arylsulfatase family; member J                                      | -0.5884 | 0.0354 |
| 219985_at   | HS3ST3A1  | heparan sulfate (glucosamine) 3-O-sulfotransferase 3A1              | -1.6164 | 0.0004 |
| 219991_at   | SLC2A9    | solute carrier family 2 (facilitated glucose transporter); member 9 | -0.3365 | 0.0058 |
| 219999_at   | MAN2A2    | mannosidase; alpha; class 2A; member 2                              | -0.6543 | 0.0164 |
| 220000_at   | SIGLEC5   | sialic acid binding Ig-like lectin 5                                | -0.2322 | 0.0026 |
| 220002_at   | KIF26B    | kinesin family member 26B                                           | -0.275  | 0.0019 |
| 220005_at   | P2RY13    | purinergic receptor P2Y; G-protein coupled; 13                      | -1.2808 | 0.0002 |
| 220006_at   | CCDC48    | coiled-coil domain containing 48                                    | -0.2181 | 0.004  |
| 220013_at   | ABHD9     | abhydrolase domain containing 9                                     | -0.113  | 0.0284 |
| 220015_at   | CASZ1     | castor zinc finger 1                                                | -0.2114 | 0.0372 |
| 220016_at   | AHNAK     | AHNAK nucleoprotein                                                 | -0.3477 | 0.0005 |
| 220025_at   | TBR1      | T-box; brain; 1                                                     | -0.119  | 0.0325 |
| 220031_at   | OTUD7B    | OTU domain containing 7B                                            | -0.1697 | 0.0065 |
| 220034_at   | IRAK3     | interleukin-1 receptor-associated kinase 3                          | -0.359  | 0.0082 |

|             |          |                                                                                           |         |        |
|-------------|----------|-------------------------------------------------------------------------------------------|---------|--------|
| 220037_s_at | LYVE1    | lymphatic vessel endothelial hyaluronan receptor 1                                        | -2.0004 | 0.0348 |
| 220046_s_at | CCNL1    | cyclin L1                                                                                 | -0.6491 | 0.0093 |
| 220050_at   | C9orf9   | chromosome 9 open reading frame 9                                                         | -0.7344 | 0.0004 |
| 220053_at   | GDF3     | growth differentiation factor 3                                                           | -0.1545 | 0.0052 |
| 220061_at   | FLJ20581 | hypothetical protein FLJ20581                                                             | -0.6671 | 0.0013 |
| 220065_at   | TNMD     | tenomodulin                                                                               | -0.164  | 0.0141 |
| 220076_at   | ANKH     | ankylosis; progressive homolog (mouse)                                                    | -0.2189 | 0.0086 |
| 220077_at   | CCDC134  | coiled-coil domain containing 134                                                         | -0.3347 | 0.0072 |
| 220078_at   | USP48    | ubiquitin specific peptidase 48                                                           | -0.5178 | 0.002  |
| 220079_s_at | USP48    | ubiquitin specific peptidase 48                                                           | -1.0444 | 0      |
| 220088_at   | C5AR1    | complement component 5a receptor 1                                                        | -2.3728 | 0.0003 |
| 220092_s_at | ANTXR1   | anthrax toxin receptor 1                                                                  | -0.5928 | 0.0002 |
| 220093_at   | ANTXR1   | anthrax toxin receptor 1                                                                  | -0.3729 | 0.0005 |
| 220097_s_at | TMEM104  | transmembrane protein 104                                                                 | -0.3634 | 0.0049 |
| 220108_at   | GNA14    | guanine nucleotide binding protein (G protein); alpha 14                                  | -0.9609 | 0      |
| 220110_s_at | NXF3     | nuclear RNA export factor 3                                                               | -0.2577 | 0      |
| 220116_at   | KCNN2    | potassium intermediate/small conductance calcium-activated channel; subfamily N; member 2 | -3.2742 | 0.0001 |
| 220118_at   | ZBTB32   | zinc finger and BTB domain containing 32                                                  | -0.1516 | 0.0312 |
| 220136_s_at | CRYBA2   | crystallin; beta A2                                                                       | -0.1489 | 0.0077 |
| 220137_at   | FLJ20674 | hypothetical protein FLJ20674                                                             | -0.3453 | 0.0075 |
| 220140_s_at | SNX11    | sorting nexin 11                                                                          | -0.4743 | 0.006  |
| 220142_at   | HAPLN2   | hyaluronan and proteoglycan link protein 2                                                | -0.1892 | 0.0271 |
| 220152_at   | C10orf95 | chromosome 10 open reading frame 95                                                       | -0.1643 | 0.0125 |
| 220153_at   | ENTPD7   | ectonucleoside triphosphate diphosphohydrolase 7                                          | -1.0424 | 0.0003 |
| 220162_s_at | CARD9    | caspase recruitment domain family; member 9                                               | -0.2462 | 0.0429 |
| 220165_at   | FLJ20309 | hypothetical protein FLJ20309                                                             | -0.1666 | 0.05   |
| 220170_at   | FHL5     | four and a half LIM domains 5                                                             | -0.8379 | 0      |
| 220180_at   | CCDC68   | coiled-coil domain containing 68                                                          | -1.6746 | 0      |
| 220187_at   | STEAP4   | STEAP family member 4                                                                     | -1.5343 | 0.0052 |
| 220191_at   | GKN1     | gastrokine 1                                                                              | -0.9288 | 0      |
| 220204_s_at | BMP8A    | bone morphogenetic protein 8a                                                             | -0.1676 | 0.0485 |
| 220209_at   | PYY2     | peptide YY; 2 (seminalplasmin)                                                            | -1.2535 | 0      |
| 220211_at   | FLJ13224 | hypothetical protein FLJ13224                                                             | -0.1561 | 0.0083 |
| 220212_s_at | THADA    | thyroid adenoma associated                                                                | -0.4147 | 0.0148 |
| 220217_x_at | SPANXC   | SPANX family; member C                                                                    | -0.2599 | 0.0079 |
| 220218_at   | C9orf68  | chromosome 9 open reading frame 68                                                        | -0.1649 | 0.0173 |
| 220248_x_at | NSFL1C   | NSFL1 (p97) cofactor (p47)                                                                | -0.4368 | 0.0066 |



|             |           |                                                                                 |         |        |
|-------------|-----------|---------------------------------------------------------------------------------|---------|--------|
| 220249_at   | HYAL4     | hyaluronoglucosaminidase 4                                                      | -0.1775 | 0.0061 |
| 220256_s_at | OXCT2     | 3-oxoacid CoA transferase 2                                                     | -0.3748 | 0.0001 |
| 220266_s_at | KLF4      | Kruppel-like factor 4 (gut)                                                     | -2.8342 | 0      |
| 220287_at   | ADAMTS9   | ADAM metalloproteinase with thrombospondin type 1 motif; 9                      | -1.2831 | 0.0056 |
| 220290_at   | AIM1L     | absent in melanoma 1-like                                                       | -0.1566 | 0.0265 |
| 220297_at   | BTBD7     | BTB (POZ) domain containing 7                                                   | -0.2172 | 0.0039 |
| 220298_s_at | SPATA6    | spermatogenesis associated 6                                                    | -0.5418 | 0.0182 |
| 220299_at   | SPATA6    | spermatogenesis associated 6                                                    | -0.5068 | 0.0098 |
| 220307_at   | CD244     | CD244 molecule; natural killer cell receptor 2B4                                | -0.1907 | 0.0202 |
| 220308_at   | CCDC19    | coiled-coil domain containing 19                                                | -0.1726 | 0.0034 |
| 220309_at   | TTC22     | tetratricopeptide repeat domain 22                                              | -0.119  | 0.0156 |
| 220318_at   | EPN3      | epsin 3                                                                         | -0.8484 | 0.0002 |
| 220319_s_at | MYLIP     | myosin regulatory light chain interacting protein                               | -1.3479 | 0.0017 |
| 220320_at   | DOK3      | docking protein 3                                                               | -0.1969 | 0.0005 |
| 220323_at   | CNTD2     | cyclin N-terminal domain containing 2                                           | -0.2381 | 0.0011 |
| 220326_s_at | FLJ10357  | hypothetical protein FLJ10357                                                   | -0.9118 | 0.028  |
| 220327_at   | VGLL3     | vestigial like 3 (Drosophila)                                                   | -0.5536 | 0      |
| 220330_s_at | SAMSN1    | SAM domain; SH3 domain and nuclear localization signals 1                       | -1.6358 | 0.0068 |
| 220332_at   | CLDN16    | claudin 16                                                                      | -0.1061 | 0.0074 |
| 220344_at   | C11orf16  | chromosome 11 open reading frame 16                                             | -0.239  | 0.0086 |
| 220348_at   | KLHL29    | kelch-like 29 (Drosophila)                                                      | -0.3665 | 0      |
| 220351_at   | CCRL1     | chemokine (C-C motif) receptor-like 1                                           | -0.2854 | 0.0401 |
| 220358_at   | SNFT      | Jun dimerization protein p21SNFT                                                | -0.3883 | 0.0268 |
| 220370_s_at | USP36     | ubiquitin specific peptidase 36                                                 | -1.0856 | 0.0007 |
| 220373_at   | DCHS2     | dachsous 2 (Drosophila)                                                         | -0.1868 | 0.0013 |
| 220383_at   | ABCG5     | ATP-binding cassette; sub-family G (WHITE); member 5 (sterolin 1)               | -0.4726 | 0      |
| 220420_at   | CPLX3     | complexin 3, lectin; mannose-binding; 1 like                                    | -0.1555 | 0.024  |
| 220421_at   | BTNL8     | butyrophilin-like 8, similar to Butyrophilin-like protein 8 precursor           | -0.1906 | 0.0275 |
| 220424_at   | NPHS2     | nephrosis 2; idiopathic; steroid-resistant (podocin)                            | -0.1188 | 0.019  |
| 220431_at   | TMPRSS11E | transmembrane protease; serine 11E, transmembrane protease; serine 11E2         | -0.132  | 0.0204 |
| 220437_at   | LOC55908  | hepatocellular carcinoma-associated gene TD26                                   | -0.193  | 0.0002 |
| 220439_at   | RIN3      | Ras and Rab interactor 3                                                        | -0.16   | 0.0167 |
| 220453_at   | PQLC2     | PQ loop repeat containing 2                                                     | -0.2042 | 0.0126 |
| 220454_s_at | SEMA6A    | sema domain; transmembrane domain (TM); and cytoplasmic domain; (semaphorin) 6A | -2.2255 | 0      |
| 220478_at   | APOL5     | apolipoprotein L; 5                                                             | -0.1016 | 0.0489 |

|             |          |                                                                            |         |        |
|-------------|----------|----------------------------------------------------------------------------|---------|--------|
| 220480_at   | HAND2    | heart and neural crest derivatives expressed 2                             | -0.1581 | 0.0248 |
| 220484_at   | MCOLN3   | mucopolin 3                                                                | -2.8949 | 0.001  |
| 220488_s_at | BCAS3    | breast carcinoma amplified sequence 3                                      | -0.6369 | 0.009  |
| 220490_at   |          |                                                                            | -0.1994 | 0.0084 |
| 220501_at   | ACTL7A   | actin-like 7A                                                              | -0.1503 | 0.002  |
| 220505_at   | C9orf53  | chromosome 9 open reading frame 53                                         | -0.1215 | 0.026  |
| 220507_s_at | UPB1     | ureidopropionase; beta                                                     | -0.1806 | 0.0011 |
| 220514_at   |          | PRO0943                                                                    | -0.239  | 0.0035 |
| 220516_at   | ZSCAN2   | zinc finger and SCAN domain containing 2                                   | -0.1107 | 0.0281 |
| 220526_s_at | MRPL20   | mitochondrial ribosomal protein L20                                        | -0.395  | 0.0134 |
| 220529_at   | FLJ11710 | hypothetical protein FLJ11710                                              | -0.3414 | 0.0006 |
| 220531_at   | FLJ14126 | hypothetical protein FLJ14126                                              | -0.4159 | 0      |
| 220538_at   | ADM2     | adrenomedullin 2                                                           | -0.1606 | 0.0281 |
| 220541_at   | MMP26    | matrix metalloproteinase 26                                                | -0.1325 | 0.0323 |
| 220543_at   | C21orf62 | chromosome 21 open reading frame 62                                        | -0.187  | 0.003  |
| 220547_s_at | FAM35A   | family with sequence similarity 35; member A                               | -0.5607 | 0      |
| 220554_at   | SLC22A7  | solute carrier family 22 (organic anion transporter); member 7             | -0.2503 | 0.0252 |
| 220556_at   | ATP1B4   | ATPase; (Na <sup>+</sup> )/K <sup>+</sup> transporting; beta 4 polypeptide | -0.1636 | 0.0046 |
| 220557_s_at | PACS1    | phosphofurin acidic cluster sorting protein 1                              | -0.1437 | 0.0214 |
| 220566_at   | PIK3R5   | phosphoinositide-3-kinase; regulatory subunit 5; p101                      | -0.195  | 0.0045 |
| 220569_at   |          |                                                                            | -0.1569 | 0.0162 |
| 220573_at   | KLK14    | kallikrein-related peptidase 14                                            | -0.2049 | 0.009  |
| 220576_at   | PGAP1    | GPI deacylase                                                              | -4.0807 | 0      |
| 220578_at   | ADAMTSL4 | ADAMTS-like 4                                                              | -0.1197 | 0.0121 |
| 220580_at   | BICC1    | bicaudal C homolog 1 (Drosophila)                                          | -0.4162 | 0.0001 |
| 220598_at   | CARD14   | caspase recruitment domain family; member 14                               | -0.1292 | 0.0456 |
| 220612_at   |          | Clone HQ0641 PRO0641                                                       | -1.811  | 0      |
| 220614_s_at | C6orf103 | chromosome 6 open reading frame 103                                        | -0.113  | 0.0231 |
| 220616_at   |          |                                                                            | -0.1719 | 0.0111 |
| 220618_s_at | ZCWPW1   | zinc finger; CW type with PWWP domain 1                                    | -0.359  | 0.0009 |
| 220630_s_at | CHIA     | chitinase; acidic                                                          | -0.1996 | 0.002  |
| 220635_at   | PSORS1C2 | psoriasis susceptibility 1 candidate 2                                     | -0.2024 | 0.0104 |
| 220645_at   | FAM55D   | family with sequence similarity 55; member D                               | -0.2056 | 0.0132 |
| 220647_s_at | CHCHD8   | coiled-coil-helix-coiled-coil-helix domain containing 8                    | -0.6259 | 0      |
| 220657_at   | KLHL11   | kelch-like 11 (Drosophila)                                                 | -0.1081 | 0.0439 |
| 220665_at   | LUZP4    | leucine zipper protein 4                                                   | -0.1133 | 0.041  |

|             |          |                                                                                  |         |        |
|-------------|----------|----------------------------------------------------------------------------------|---------|--------|
| 220670_at   |          |                                                                                  | -0.1113 | 0.042  |
| 220677_s_at | ADAMTS8  | ADAM metalloproteinase with thrombospondin type 1 motif; 8                       | -0.1505 | 0.0136 |
| 220681_at   | C22orf26 | chromosome 22 open reading frame 26                                              | -0.1572 | 0.0431 |
| 220682_s_at |          |                                                                                  | -0.1688 | 0.0282 |
| 220689_at   |          |                                                                                  | -0.1244 | 0.0459 |
| 220714_at   | PRDM14   | PR domain containing 14                                                          | -0.1461 | 0.0481 |
| 220722_s_at | SLC5A7   | solute carrier family 5 (choline transporter); member 7                          | -0.2897 | 0      |
| 220732_at   | DEPDC2   | DEP domain containing 2                                                          | -0.1489 | 0.0216 |
| 220733_at   | SLC26A1  | solute carrier family 26 (sulfate transporter); member 1                         | -0.1839 | 0.0131 |
| 220736_at   | SLC19A3  | solute carrier family 19; member 3                                               | -0.1622 | 0.0425 |
| 220742_s_at | NGLY1    | N-glycanase 1                                                                    | -0.7806 | 0.0001 |
| 220743_at   |          |                                                                                  | -0.1782 | 0.0267 |
| 220745_at   | IL19     | interleukin 19                                                                   | -0.1344 | 0.0341 |
| 220751_s_at | C5orf4   | chromosome 5 open reading frame 4                                                | -1.3767 | 0.0027 |
| 220753_s_at | CRYL1    | crystallin; lambda 1                                                             | -1.8276 | 0      |
| 220765_s_at | LIMS2    | LIM and senescent cell antigen-like domains 2                                    | -0.4473 | 0.0017 |
| 220767_at   |          |                                                                                  | -0.1255 | 0.0018 |
| 220777_at   | KIF13A   | kinesin family member 13A                                                        | -0.3944 | 0.0306 |
| 220784_s_at | UTS2     | urotensin 2                                                                      | -2.3835 | 0.0058 |
| 220786_s_at | SLC38A4  | solute carrier family 38; member 4                                               | -0.3468 | 0.0001 |
| 220795_s_at | BEGAIN   | brain-enriched guanylate kinase-associated homolog (rat)                         | -0.3645 | 0.0004 |
| 220804_s_at | TP73     | tumor protein p73                                                                | -0.1541 | 0.0247 |
| 220806_x_at | GNG13    | guanine nucleotide binding protein (G protein); gamma 13                         | -0.1731 | 0.0046 |
| 220808_at   | THEG     | Theg homolog (mouse)                                                             | -0.1468 | 0.0077 |
| 220816_at   | EDG7     | endothelial differentiation; lysophosphatidic acid G-protein-coupled receptor; 7 | -0.2891 | 0.0013 |
| 220819_at   | FRMD1    | FERM domain containing 1                                                         | -0.1135 | 0.0266 |
| 220825_s_at | KIRREL   | kin of IRRE like (Drosophila)                                                    | -0.2123 | 0.018  |
| 220834_at   | MS4A12   | membrane-spanning 4-domains; subfamily A; member 12                              | -0.1184 | 0.0357 |
| 220835_s_at | ZNF407   | zinc finger protein 407                                                          | -0.147  | 0.0226 |
| 220848_x_at | OBP2A    | odorant binding protein 2A                                                       | -0.1221 | 0.0427 |
| 220852_at   | PRO1768  | PRO1768 protein                                                                  | -0.1401 | 0.0185 |
| 220858_at   | SORBS2   | sorbin and SH3 domain containing 2                                               | -1.5457 | 0.0051 |
| 220863_at   | MIP      | major intrinsic protein of lens fiber                                            | -0.1467 | 0.0126 |
| 220873_at   |          | PRO0386                                                                          | -0.1177 | 0.0405 |
| 220875_at   |          |                                                                                  | -0.15   | 0.0052 |
| 220881_at   |          | PRO1787                                                                          | -0.1121 | 0.0466 |
| 220886_at   | GABRQ    | gamma-aminobutyric acid (GABA) receptor; theta                                   | -0.165  | 0.0048 |

|             |            |                                                                                                              |         |        |
|-------------|------------|--------------------------------------------------------------------------------------------------------------|---------|--------|
| 220887_at   | C14orf162  | chromosome 14 open reading frame 162                                                                         | -0.1537 | 0.0318 |
| 220918_at   | C21orf96   | chromosome 21 open reading frame 96                                                                          | -0.3806 | 0.0137 |
| 220921_at   | SPANXB1    | SPANX family; member B1, SPANX family; member B2                                                             | -0.1385 | 0.0406 |
| 220924_s_at | SLC38A2    | solute carrier family 38; member 2                                                                           | -0.3767 | 0.0421 |
| 220943_s_at | C2orf56    | chromosome 2 open reading frame 56                                                                           | -0.4673 | 0.0239 |
| 220944_at   | PGLYRP4    | peptidoglycan recognition protein 4                                                                          | -0.1837 | 0.0061 |
| 220960_x_at | RPL22      | ribosomal protein L22                                                                                        | -0.2223 | 0.0037 |
| 220964_s_at | RAB1B      | RAB1B; member RAS oncogene family                                                                            | -0.4528 | 0.01   |
| 220965_s_at | RSHL1      | radial spokehead-like 1                                                                                      | -0.2321 | 0.0151 |
| 220970_s_at | KRTAP2-4   | keratin associated protein 2-4, similar to keratin associated protein 2-4                                    | -0.1481 | 0.0035 |
| 220975_s_at | C1QTNF1    | C1q and tumor necrosis factor related protein 1                                                              | -1.7247 | 0.0001 |
| 220976_s_at | KRTAP1-1   | keratin associated protein 1-1, similar to keratin associated protein 1-1                                    | -0.1155 | 0.0461 |
| 220979_s_at | ST6GALNAC5 | ST6 (alpha-N-acetyl-neuraminy-2;3-beta-galactosyl-1;3)-N-acetylgalactosaminide alpha-2;6-sialyltransferase 5 | -3.6553 | 0      |
| 220984_s_at | SLCO5A1    | solute carrier organic anion transporter family; member 5A1                                                  | -0.1242 | 0.0215 |
| 220990_s_at | MIRN21     | microRNA 21, transmembrane protein 49                                                                        | -0.544  | 0.0048 |
| 220998_s_at | UNC93B1    | unc-93 homolog B1 (C. elegans)                                                                               | -0.3809 | 0.0124 |
| 221001_at   | C15orf49   | chromosome 15 open reading frame 49                                                                          | -0.1705 | 0.0089 |
| 221003_s_at | CAB39L     | calcium binding protein 39-like                                                                              | -0.7442 | 0      |
| 221005_s_at | PTDSS2     | phosphatidylserine synthase 2                                                                                | -0.3878 | 0.0092 |
| 221015_s_at | CDADC1     | cytidine and dCMP deaminase domain containing 1                                                              | -0.3333 | 0.0063 |
| 221016_s_at | TCF7L1     | transcription factor 7-like 1 (T-cell specific; HMG-box)                                                     | -0.3247 | 0.0324 |
| 221017_s_at | LRRC3      | leucine rich repeat containing 3                                                                             | -0.145  | 0.0037 |
| 221024_s_at | SLC2A10    | solute carrier family 2 (facilitated glucose transporter); member 10                                         | -1.5901 | 0.0328 |
| 221044_s_at | TRIM34     | tripartite motif-containing 34, tripartite motif-containing 6 and tripartite motif-containing 34             | -1.3156 | 0      |
| 221060_s_at | TLR4       | toll-like receptor 4                                                                                         | -0.7344 | 0.0002 |
| 221061_at   | PKD2L1     | polycystic kidney disease 2-like 1                                                                           | -0.1777 | 0.0024 |
| 221068_at   | ANKRD25    | ankyrin repeat domain 25                                                                                     | -0.173  | 0.0083 |
| 221072_at   | C9orf31    | chromosome 9 open reading frame 31                                                                           | -0.1328 | 0.041  |
| 221074_at   | NCR2       | Natural cytotoxicity triggering receptor 2                                                                   | -0.1543 | 0.0273 |
| 221081_s_at | DENND2D    | DENN/MADD domain containing 2D                                                                               | -0.8794 | 0.037  |
| 221083_at   | KCNQ4      | potassium voltage-gated channel; KQT-like subfamily; member 4                                                | -0.3088 | 0.0046 |
| 221085_at   | TNFSF15    | tumor necrosis factor (ligand) superfamily; member 15                                                        | -0.1434 | 0.0176 |

|             |           |                                                          |         |        |
|-------------|-----------|----------------------------------------------------------|---------|--------|
| 221087_s_at | APOL3     | apolipoprotein L; 3                                      | -1.1409 | 0.0001 |
| 221096_s_at | TMCO6     | transmembrane and coiled-coil domains 6                  | -0.7801 | 0.0027 |
| 221105_at   |           |                                                          | -0.1306 | 0.0056 |
| 221107_at   | CHRNA9    | cholinergic receptor; nicotinic; alpha 9                 | -0.1353 | 0.047  |
| 221108_at   | LOC51233  | hypothetical protein LOC51233                            | -0.1038 | 0.002  |
| 221114_at   | AMBN      | ameloblastin (enamel matrix protein)                     | -0.2301 | 0.0209 |
| 221119_at   | FLJ20184  | hypothetical protein FLJ20184                            | -0.195  | 0.0076 |
| 221127_s_at | RIG       | regulated in glioma                                      | -1.6952 | 0      |
| 221129_at   | C17orf88  | chromosome 17 open reading frame 88                      | -0.1463 | 0.0016 |
| 221131_at   | A4GNT     | alpha-1;4-N-acetylglucosaminyltransferase                | -0.1247 | 0.0237 |
| 221151_at   | PRDM9     | PR domain containing 9                                   | -0.1579 | 0.0277 |
| 221157_s_at | FBXO24    | F-box protein 24                                         | -0.1818 | 0.023  |
| 221160_s_at | CABP5     | calcium binding protein 5                                | -0.1822 | 0.0002 |
| 221162_at   | HHLA1     | HERV-H LTR-associating 1                                 | -0.3569 | 0.0003 |
| 221163_s_at | MLXIPL    | MLX interacting protein-like                             | -0.7792 | 0.0078 |
| 221166_at   | FGF23     | fibroblast growth factor 23                              | -0.1741 | 0.0111 |
| 221186_at   |           | CDNA FLJ12781 fis; clone NT2RP2001861                    | -0.2296 | 0.0017 |
| 221188_s_at | CIDEB     | cell death-inducing DFFA-like effector b                 | -1.0785 | 0.0337 |
| 221207_s_at | NBEA      | neurobeachin                                             | -1.6202 | 0.0014 |
| 221229_s_at | FLJ20628  | hypothetical protein FLJ20628                            | -0.776  | 0.0044 |
| 221235_s_at | LOC644617 | Hypothetical LOC644617                                   | -1.1174 | 0      |
| 221236_s_at | STMN4     | stathmin-like 4                                          | -0.2141 | 0.0002 |
| 221237_s_at | OSBP2     | oxysterol binding protein 2                              | -0.3179 | 0.0046 |
| 221245_s_at | FZD5      | frizzled homolog 5 (Drosophila)                          | -1.5399 | 0.0001 |
| 221246_x_at | TNS1      | tensin 1                                                 | -0.4768 | 0.0003 |
| 221249_s_at | FAM117A   | family with sequence similarity 117; member A            | -0.6633 | 0.0094 |
| 221251_x_at | ZNHIT4    | zinc finger; HIT type 4                                  | -0.2559 | 0.0345 |
| 221256_s_at | HDHD3     | haloacid dehalogenase-like hydrolase domain containing 3 | -1.2968 | 0.0131 |
| 221263_s_at | SF3B5     | splicing factor 3b; subunit 5; 10kDa                     | -0.4582 | 0.0009 |
| 221271_at   | IL21      | interleukin 21                                           | -0.1067 | 0.0192 |
| 221272_s_at | C1orf21   | chromosome 1 open reading frame 21                       | -1.1482 | 0.0106 |
| 221273_s_at | RNF208    | ring finger protein 208                                  | -0.367  | 0.0134 |
| 221278_at   | HOXB8     | homeobox B8                                              | -0.1437 | 0.0007 |
| 221283_at   | RUNX2     | runt-related transcription factor 2                      | -0.1473 | 0.007  |
| 221292_at   | PTCH2     | patched homolog 2 (Drosophila)                           | -0.144  | 0.0108 |
| 221293_s_at | DEF6      | differentially expressed in FDCP 6 homolog (mouse)       | -0.1989 | 0.0179 |
| 221299_at   | GPR173    | G protein-coupled receptor 173                           | -0.1039 | 0.0329 |

|             |          |                                                                                                                                  |         |        |
|-------------|----------|----------------------------------------------------------------------------------------------------------------------------------|---------|--------|
| 221301_at   | C6orf27  | chromosome 6 open reading frame 27                                                                                               | -0.1295 | 0.0306 |
| 221310_at   | FGF14    | fibroblast growth factor 14                                                                                                      | -0.2302 | 0      |
| 221313_at   | GPR52    | G protein-coupled receptor 52                                                                                                    | -0.2619 | 0.0005 |
| 221318_at   | NEUROD4  | neurogenic differentiation 4                                                                                                     | -0.1766 | 0.0339 |
| 221320_at   | BCL2L10  | BCL2-like 10 (apoptosis facilitator)                                                                                             | -0.2086 | 0.0016 |
| 221329_at   | OR52A1   | olfactory receptor; family 52; subfamily A; member 1                                                                             | -0.1685 | 0.0029 |
| 221334_s_at | FOXP3    | forkhead box P3                                                                                                                  | -0.1373 | 0.0344 |
| 221336_at   | ATOH1    | atonal homolog 1 (Drosophila)                                                                                                    | -0.2255 | 0.0024 |
| 221338_at   | LY6G6E   | lymphocyte antigen 6 complex; locus G6E                                                                                          | -0.1658 | 0.001  |
| 221339_at   | OR10C1   | olfactory receptor; family 10; subfamily C; member 1                                                                             | -0.1175 | 0.0162 |
| 221341_s_at | OR1D4    | olfactory receptor; family 1; subfamily D; member 4, olfactory receptor; family 1; subfamily D; member 5                         | -0.1071 | 0.03   |
| 221342_at   | C6orf25  | chromosome 6 open reading frame 25                                                                                               | -0.206  | 0.0038 |
| 221345_at   | FFAR2    | free fatty acid receptor 2                                                                                                       | -0.1694 | 0.0026 |
| 221347_at   | CHRM5    | cholinergic receptor; muscarinic 5                                                                                               | -0.2484 | 0.0072 |
| 221352_at   | HUMBINDC | DNA binding protein for surfactant protein B                                                                                     | -0.126  | 0.035  |
| 221354_s_at | MCHR1    | melanin-concentrating hormone receptor 1                                                                                         | -0.1638 | 0.001  |
| 221355_at   | CHRNA3   | cholinergic receptor; nicotinic; gamma                                                                                           | -0.1477 | 0.0058 |
| 221357_at   | CHRM4    | cholinergic receptor; muscarinic 4                                                                                               | -0.1691 | 0.0092 |
| 221369_at   | MTNR1A   | melatonin receptor 1A                                                                                                            | -0.1097 | 0.0201 |
| 221371_at   | TNFSF18  | tumor necrosis factor (ligand) superfamily; member 18                                                                            | -0.1302 | 0.0488 |
| 221373_x_at | PSPN     | persephin                                                                                                                        | -0.1303 | 0.0342 |
| 221374_at   | FGF16    | fibroblast growth factor 16                                                                                                      | -0.174  | 0.0027 |
| 221375_at   | OR1G1    | olfactory receptor; family 1; subfamily G; member 1                                                                              | -0.1432 | 0.0065 |
| 221378_at   | CER1     | cerberus 1; cysteine knot superfamily; homolog (Xenopus laevis)                                                                  | -0.1368 | 0.0265 |
| 221379_at   |          |                                                                                                                                  | -0.2111 | 0.004  |
| 221382_at   |          |                                                                                                                                  | -0.1075 | 0.0305 |
| 221383_at   | NMUR1    | neuromedin U receptor 1                                                                                                          | -0.1436 | 0.01   |
| 221384_at   | UCP1     | uncoupling protein 1 (mitochondrial; proton carrier)                                                                             | -0.1961 | 0.0051 |
| 221385_s_at | FFAR3    | G protein-coupled receptor 42, free fatty acid receptor 3, similar to Free fatty acid receptor 3 (G-protein coupled receptor 41) | -0.1577 | 0.0105 |
| 221389_at   | PLA2G2E  | phospholipase A2; group IIE                                                                                                      | -0.2106 | 0.001  |
| 221390_s_at | MTMR8    | myotubularin related protein 8                                                                                                   | -0.2257 | 0.0159 |
| 221393_at   | TAAR3    | trace amine associated receptor 3                                                                                                | -0.1035 | 0.0116 |
| 221401_at   | CACNG5   | calcium channel; voltage-dependent; gamma subunit 5                                                                              | -0.1806 | 0.0199 |

|             |             |                                                                                                                                                                                                                                                            |         |        |
|-------------|-------------|------------------------------------------------------------------------------------------------------------------------------------------------------------------------------------------------------------------------------------------------------------|---------|--------|
| 221402_at   | OR1F1       | olfactory receptor; family 1; subfamily F; member 1                                                                                                                                                                                                        | -0.1179 | 0.046  |
| 221404_at   | IL1F6       | interleukin 1 family; member 6 (epsilon)                                                                                                                                                                                                                   | -0.1457 | 0.0302 |
| 221411_at   | HOXD12      | homeobox D12                                                                                                                                                                                                                                               | -0.1414 | 0.0196 |
| 221416_at   | PLA2G2F     | phospholipase A2; group IIF                                                                                                                                                                                                                                | -0.1374 | 0.0091 |
| 221425_s_at | ISCA1       | iron-sulfur cluster assembly 1 homolog (S. cerevisiae)                                                                                                                                                                                                     | -0.6828 | 0.0384 |
| 221432_s_at | SLC25A28    | solute carrier family 25; member 28                                                                                                                                                                                                                        | -1.2487 | 0      |
| 221435_x_at | HYI         | hydroxypyruvate isomerase homolog (E. coli)                                                                                                                                                                                                                | -0.6371 | 0.0017 |
| 221437_s_at | MRPS15      | mitochondrial ribosomal protein S15                                                                                                                                                                                                                        | -0.5641 | 0.0361 |
| 221439_at   | RBBP9       | retinoblastoma binding protein 9                                                                                                                                                                                                                           | -0.1307 | 0.0267 |
| 221442_at   | MC3R        | melanocortin 3 receptor                                                                                                                                                                                                                                    | -0.1472 | 0.0011 |
| 221445_at   | OR1A2       | olfactory receptor; family 1; subfamily A; member 2                                                                                                                                                                                                        | -0.1505 | 0.0307 |
| 221451_s_at | OR2W1       | olfactory receptor; family 2; subfamily W; member 1                                                                                                                                                                                                        | -0.1219 | 0.0235 |
| 221452_s_at | TMEM14B     | transmembrane protein 14B                                                                                                                                                                                                                                  | -0.9016 | 0.0002 |
| 221459_at   | TAAR5       | trace amine associated receptor 5                                                                                                                                                                                                                          | -0.2151 | 0.0019 |
| 221472_at   | SERINC3     | serine incorporator 3                                                                                                                                                                                                                                      | -0.3215 | 0.0309 |
| 221474_at   | MRLC2       | myosin regulatory light chain MRLC2                                                                                                                                                                                                                        | -0.2156 | 0.0021 |
| 221486_at   | ENSA        | endosulfine alpha                                                                                                                                                                                                                                          | -0.986  | 0.0003 |
| 221488_s_at | CUTA        | cutA divalent cation tolerance homolog (E. coli)                                                                                                                                                                                                           | -0.3844 | 0.0161 |
| 221490_at   | UBAP1       | ubiquitin associated protein 1                                                                                                                                                                                                                             | -0.9347 | 0      |
| 221491_x_at | hCG_1998957 | hypothetical protein LOC730415, major histocompatibility complex; class II; DR beta 1, major histocompatibility complex; class II; DR beta 3, major histocompatibility complex; class II; DR beta 4, major histocompatibility complex; class II; DR beta 5 | -2.2284 | 0.0035 |
| 221493_at   | TSPYL1      | TSPY-like 1                                                                                                                                                                                                                                                | -0.6244 | 0      |
| 221496_s_at | TOB2        | transducer of ERBB2; 2                                                                                                                                                                                                                                     | -0.8131 | 0.0288 |
| 221512_at   | C1orf160    | chromosome 1 open reading frame 160                                                                                                                                                                                                                        | -0.4278 | 0.0376 |
| 221518_s_at | USP47       | ubiquitin specific peptidase 47                                                                                                                                                                                                                            | -0.5406 | 0.0017 |
| 221541_at   | CRISPLD2    | cysteine-rich secretory protein LCCL domain containing 2                                                                                                                                                                                                   | -3.0853 | 0      |
| 221546_at   | PRPF18      | PRP18 pre-mRNA processing factor 18 homolog (S. cerevisiae)                                                                                                                                                                                                | -0.1158 | 0.0302 |
| 221547_at   | PRPF18      | PRP18 pre-mRNA processing factor 18 homolog (S. cerevisiae)                                                                                                                                                                                                | -0.447  | 0.0402 |
| 221559_s_at | MIS12       | MIS12; MIND kinetochore complex component; homolog (yeast)                                                                                                                                                                                                 | -0.3721 | 0.0196 |
| 221561_at   | SOAT1       | sterol O-acyltransferase (acyl-Coenzyme A: cholesterol acyltransferase) 1                                                                                                                                                                                  | -0.878  | 0.0069 |
| 221562_s_at | SIRT3       | sirtuin (silent mating type information regulation 2 homolog) 3 (S. cerevisiae)                                                                                                                                                                            | -0.4358 | 0.0227 |
| 221568_s_at | LIN7C       | lin-7 homolog C (C. elegans)                                                                                                                                                                                                                               | -0.4599 | 0.0001 |

|             |           |                                                                               |         |        |
|-------------|-----------|-------------------------------------------------------------------------------|---------|--------|
| 221581_s_at | LAT2      | linker for activation of T cells family; member 2                             | -0.6671 | 0.0115 |
| 221585_at   | CACNG4    | calcium channel; voltage-dependent; gamma subunit 4                           | -0.1629 | 0.0211 |
| 221589_s_at | ALDH6A1   | aldehyde dehydrogenase 6 family; member A1                                    | -1.0928 | 0.0041 |
| 221599_at   | C11orf67  | chromosome 11 open reading frame 67                                           | -1.0946 | 0      |
| 221600_s_at | C11orf67  | chromosome 11 open reading frame 67                                           | -1.159  | 0.0008 |
| 221605_s_at | PIPOX     | pipecolic acid oxidase                                                        | -0.2749 | 0.028  |
| 221614_s_at | RPH3AL    | rabphilin 3A-like (without C2 domains)                                        | -1.4918 | 0      |
| 221622_s_at | TMEM126B  | transmembrane protein 126B                                                    | -0.7114 | 0.0013 |
| 221636_s_at | MOSC2     | MOCO sulphurase C-terminal domain containing 2                                | -0.8143 | 0.0499 |
| 221641_s_at | ACOT9     | acyl-CoA thioesterase 9                                                       | -0.5147 | 0.009  |
| 221644_s_at | SLC45A2   | solute carrier family 45; member 2                                            | -0.1382 | 0.0047 |
| 221656_s_at | ARHGEF10L | Rho guanine nucleotide exchange factor (GEF) 10-like                          | -0.7965 | 0      |
| 221662_s_at | SLC22A7   | solute carrier family 22 (organic anion transporter); member 7                | -0.2129 | 0.0028 |
| 221669_s_at | ACAD8     | acyl-Coenzyme A dehydrogenase family; member 8                                | -1.3088 | 0.0001 |
| 221675_s_at | CHPT1     | choline phosphotransferase 1                                                  | -0.7053 | 0.003  |
| 221678_at   | ABHD6     | abhydrolase domain containing 6                                               | -0.1486 | 0.0316 |
| 221688_s_at | IMP3      | IMP3; U3 small nucleolar ribonucleoprotein; homolog (yeast)                   | -0.6204 | 0.0033 |
| 221689_s_at | PIGP      | phosphatidylinositol glycan anchor biosynthesis; class P                      | -0.7496 | 0.0018 |
| 221698_s_at | CLEC7A    | C-type lectin domain family 7; member A                                       | -1.9002 | 0.0005 |
| 221704_s_at | VPS37B    | vacuolar protein sorting 37 homolog B (S. cerevisiae)                         | -2.6283 | 0      |
| 221714_s_at | LOC730092 | RRN3 RNA polymerase I transcription factor homolog (S. cerevisiae) pseudogene | -0.1488 | 0.0166 |
| 221717_at   |           |                                                                               | -0.2237 | 0.0005 |
| 221719_s_at | LZTS1     | leucine zipper; putative tumor suppressor 1                                   | -0.2383 | 0.0096 |
| 221721_s_at | LZTS1     | leucine zipper; putative tumor suppressor 1                                   | -0.1032 | 0.0287 |
| 221725_at   | WASF2     | WAS protein family; member 2                                                  | -0.7346 | 0.0257 |
| 221731_x_at | VCAN      | versican                                                                      | -2.6689 | 0.0105 |
| 221740_x_at | LRRC37A2  | CDNA clone IMAGE:4902949, Leucine rich repeat containing 37; member A2        | -0.6236 | 0.0031 |
| 221747_at   | TNS1      | Tensin 1                                                                      | -1.7138 | 0.0005 |
| 221748_s_at | TNS1      | tensin 1                                                                      | -1.2596 | 0.0026 |
| 221760_at   | MAN1A1    | mannosidase; alpha; class 1A; member 1                                        | -1.8185 | 0.0002 |
| 221767_x_at | HDLBP     | high density lipoprotein binding protein (vigilin)                            | -0.242  | 0.0319 |
| 221769_at   | SPSB3     | splA/ryanodine receptor domain and SOCS box containing 3                      | -0.5973 | 0.0073 |
| 221773_at   | ELK3      | ELK3; ETS-domain protein (SRF accessory protein 2)                            | -1.3751 | 0.0034 |



|             |           |                                                                                          |         |        |
|-------------|-----------|------------------------------------------------------------------------------------------|---------|--------|
| 221775_x_at | RPL22     | ribosomal protein L22                                                                    | -0.2815 | 0.005  |
| 221787_at   | C6orf120  | chromosome 6 open reading frame 120                                                      | -0.6999 | 0.01   |
| 221788_at   |           | CDNA FLJ11614 fis; clone HEMBA1004015                                                    | -1.3254 | 0.0003 |
| 221808_at   | RAB9A     | RAB9A; member RAS oncogene family                                                        | -0.6649 | 0.0251 |
| 221809_at   | RANBP10   | RAN binding protein 10                                                                   | -0.9369 | 0.0192 |
| 221816_s_at | PHF11     | PHD finger protein 11                                                                    | -1.238  | 0.0001 |
| 221822_at   | CCDC101   | coiled-coil domain containing 101                                                        | -0.4169 | 0.0007 |
| 221824_s_at | 8-Mar     | membrane-associated ring finger (C3HC4) 8                                                | -0.6881 | 0.0023 |
| 221831_at   | LUZP1     | leucine zipper protein 1                                                                 | -0.6335 | 0.0001 |
| 221832_s_at | LUZP1     | leucine zipper protein 1                                                                 | -0.7353 | 0.0002 |
| 221839_s_at | UBAP2     | ubiquitin associated protein 2                                                           | -0.5041 | 0.0224 |
| 221840_at   | PTPRE     | protein tyrosine phosphatase; receptor type; E                                           | -1.5327 | 0.0156 |
| 221841_s_at | KLF4      | Kruppel-like factor 4 (gut)                                                              | -2.3871 | 0      |
| 221844_x_at |           | CDNA clone IMAGE:6208446                                                                 | -0.3881 | 0.014  |
| 221846_s_at | CASKIN2   | CASK interacting protein 2                                                               | -0.6934 | 0.0034 |
| 221847_at   |           | Full-length cDNA clone CS0DE005YD08 of Placenta of Homo sapiens (human)                  | -0.5875 | 0.0098 |
| 221872_at   | RARRES1   | retinoic acid receptor responder (tazarotene induced) 1                                  | -1.982  | 0.0007 |
| 221885_at   | DENND2A   | DENN/MADD domain containing 2A                                                           | -0.3357 | 0      |
| 221900_at   | COL8A2    | collagen; type VIII; alpha 2                                                             | -0.313  | 0.0359 |
| 221904_at   | FAM131A   | family with sequence similarity 131; member A                                            | -0.6985 | 0.0102 |
| 221907_at   | C14orf172 | chromosome 14 open reading frame 172                                                     | -0.3158 | 0.0066 |
| 221913_at   | SIRT3     | sirtuin (silent mating type information regulation 2 homolog) 3 ( <i>S. cerevisiae</i> ) | -0.2235 | 0.0097 |
| 221921_s_at | CADM3     | cell adhesion molecule 3                                                                 | -0.2639 | 0.0155 |
| 221928_at   | ACACB     | acetyl-Coenzyme A carboxylase beta                                                       | -0.5802 | 0.0186 |
| 221929_at   | RBM12B    | RNA binding motif protein 12B                                                            | -0.2257 | 0.0146 |
| 221930_at   | PHF7      | PHD finger protein 7                                                                     | -0.1184 | 0.0146 |
| 221931_s_at | SEH1L     | SEH1-like ( <i>S. cerevisiae</i> )                                                       | -0.421  | 0.0207 |
| 221947_at   |           |                                                                                          | -0.1874 | 0.0097 |
| 221949_at   | LOC222070 | hypothetical protein LOC222070                                                           | -0.6151 | 0      |
| 221951_at   | TMEM80    | transmembrane protein 80                                                                 | -1.3854 | 0      |
| 221979_at   | TOPORS    | Topoisomerase I binding; arginine/serine-rich                                            | -1.1235 | 0.0001 |
| 221980_at   | EMILIN2   | Elastin microfibril interfacer 2                                                         | -0.1172 | 0.0444 |
| 221990_at   | PAX8      | paired box 8                                                                             | -0.1891 | 0.0022 |
| 221995_s_at |           |                                                                                          | -0.5245 | 0.0013 |
| 222002_at   | C7orf26   | Chromosome 7 open reading frame 26                                                       | -0.1004 | 0.0153 |
| 222005_s_at | GNG3      | guanine nucleotide binding protein (G protein); gamma 3                                  | -0.2858 | 0.0008 |

|             |              |                                                                                                    |         |        |
|-------------|--------------|----------------------------------------------------------------------------------------------------|---------|--------|
| 222015_at   | CSNK1E       | Casein kinase 1; epsilon                                                                           | -0.407  | 0.0213 |
| 222043_at   | CLU          | clusterin                                                                                          | -1.1084 | 0.0166 |
| 222044_at   | C20orf67     | chromosome 20 open reading frame 67                                                                | -0.8658 | 0      |
| 222045_s_at | C20orf67     | chromosome 20 open reading frame 67                                                                | -0.5553 | 0.0046 |
| 222049_s_at | RBP4         | Retinol binding protein 4; plasma                                                                  | -0.1581 | 0.0001 |
| 222064_s_at | AARSD1       | alanyl-tRNA synthetase domain containing 1                                                         | -0.8008 | 0.0004 |
| 222065_s_at | FLII         | flightless I homolog (Drosophila)                                                                  | -0.334  | 0.0264 |
| 222066_at   | EPB41L1      | Erythrocyte membrane protein band 4.1-like 1                                                       | -0.2027 | 0.0226 |
| 222069_s_at |              |                                                                                                    | -0.1292 | 0.0396 |
| 222073_at   | COL4A3       | collagen; type IV; alpha 3 (Goodpasture antigen)                                                   | -4.5202 | 0      |
| 222078_at   |              | Transcribed locus                                                                                  | -0.1401 | 0.0464 |
| 222084_s_at | SBF1         | SET binding factor 1                                                                               | -0.1598 | 0.0083 |
| 222093_s_at | ZNHIT4       | zinc finger; HIT type 4                                                                            | -0.3104 | 0.02   |
| 222095_s_at | C1orf76      | chromosome 1 open reading frame 76                                                                 | -0.3586 | 0.0039 |
| 222100_at   | CYP2E1       | Cytochrome P450; family 2; subfamily E; polypeptide 1                                              | -0.1847 | 0.0153 |
| 222116_s_at | TBC1D16      | TBC1 domain family; member 16                                                                      | -0.9888 | 0.0019 |
| 222125_s_at | PH-4         | hypoxia-inducible factor prolyl 4-hydroxylase                                                      | -0.7639 | 0.0272 |
| 222148_s_at | RHOT1        | ras homolog gene family; member T1                                                                 | -0.3769 | 0.0156 |
| 222162_s_at | ADAMTS1      | ADAM metalloproteinase with thrombospondin type 1 motif; 1                                         | -2.7806 | 0      |
| 222171_s_at | PKNOX2       | PBX/knotted 1 homeobox 2                                                                           | -0.4064 | 0      |
| 222192_s_at | C2orf43      | chromosome 2 open reading frame 43                                                                 | -0.5651 | 0.0235 |
| 222200_s_at | BSDC1        | BSD domain containing 1                                                                            | -0.3515 | 0.0077 |
| 222209_s_at | TMEM135      | transmembrane protein 135                                                                          | -0.8563 | 0.0347 |
| 222229_x_at | LOC392501    | similar to 60S ribosomal protein L26                                                               | -0.3566 | 0.0001 |
| 222231_s_at | LRRC59       | leucine rich repeat containing 59                                                                  | -0.5294 | 0.0004 |
| 222234_s_at | DBNDD1       | dysbindin (dystrobrevin binding protein 1) domain containing 1                                     | -0.2403 | 0.0336 |
| 222243_s_at | TOB2         | transducer of ERBB2; 2                                                                             | -1.1886 | 0.0003 |
| 222256_s_at | PLA2G4B      | phospholipase A2; group IVB (cytosolic)                                                            | -0.3731 | 0.0024 |
| 222261_at   | KIAA1609     | KIAA1609                                                                                           | -0.1041 | 0.0427 |
| 222268_x_at | MUC5B        | mucin 5B; oligomeric mucus/gel-forming                                                             | -0.1323 | 0.0244 |
| 222279_at   | RP3-377H14.5 | hypothetical protein FLJ35429                                                                      | -0.4456 | 0.017  |
| 222288_at   |              | Transcribed locus; moderately similar to XP_517655.1 similar to KIAA0825 protein [Pan troglodytes] | -1.6297 | 0.0056 |

|             |           |                                                                                                                                                                                                                                                                                    |         |        |
|-------------|-----------|------------------------------------------------------------------------------------------------------------------------------------------------------------------------------------------------------------------------------------------------------------------------------------|---------|--------|
| 222290_at   | LOC730421 | olfactory receptor; family 2; subfamily A; member 20 pseudogene, olfactory receptor; family 2; subfamily A; member 9 pseudogene, region containing olfactory receptor; family 2; subfamily A; member 9 pseudogene; olfactory receptor; family 2; subfamily A; member 20 pseudogene | -0.1917 | 0.0127 |
| 222294_s_at |           | CDNA clone IMAGE:5745639                                                                                                                                                                                                                                                           | -0.9517 | 0.0222 |
| 222297_x_at | LOC390612 | similar to ribosomal protein L18                                                                                                                                                                                                                                                   | -0.1595 | 0.0255 |
| 222302_at   |           |                                                                                                                                                                                                                                                                                    | -1.0635 | 0.0004 |
| 222303_at   |           |                                                                                                                                                                                                                                                                                    | -2.0592 | 0.0004 |
| 222304_x_at | OR7E47P   | olfactory receptor; family 7; subfamily E; member 47 pseudogene                                                                                                                                                                                                                    | -0.1996 | 0.0239 |
| 222321_at   | AGTR2     | angiotensin II receptor; type 2                                                                                                                                                                                                                                                    | -0.3373 | 0.0046 |
| 222327_x_at | OR7E156P  | olfactory receptor; family 7; subfamily E; member 156 pseudogene                                                                                                                                                                                                                   | -0.3313 | 0.0007 |
| 222332_at   |           |                                                                                                                                                                                                                                                                                    | -0.1341 | 0.0448 |
| 222333_at   | ALS2CL    | ALS2 C-terminal like                                                                                                                                                                                                                                                               | -0.3649 | 0.0327 |
| 222334_at   |           |                                                                                                                                                                                                                                                                                    | -0.1268 | 0.0247 |
| 222351_at   | PPP2R1B   | protein phosphatase 2 (formerly 2A); regulatory subunit A; beta isoform                                                                                                                                                                                                            | -0.554  | 0.0003 |
| 222355_at   |           | Transcribed locus                                                                                                                                                                                                                                                                  | -0.1182 | 0.037  |
| 222365_at   |           | Transcribed locus                                                                                                                                                                                                                                                                  | -0.2776 | 0.0012 |
| 222377_at   | TBX10     | T-box 10                                                                                                                                                                                                                                                                           | -0.27   | 0.0103 |
| 222391_at   | TMEM30A   | transmembrane protein 30A                                                                                                                                                                                                                                                          | -0.3283 | 0.0495 |
| 222401_s_at | TMEM50A   | transmembrane protein 50A                                                                                                                                                                                                                                                          | -0.5611 | 0.0044 |
| 222408_s_at | YPEL5     | yippee-like 5 (Drosophila)                                                                                                                                                                                                                                                         | -0.4105 | 0.0153 |
| 222411_s_at | SSR3      | signal sequence receptor; gamma (translocon-associated protein gamma)                                                                                                                                                                                                              | -0.4217 | 0.0392 |
| 222425_s_at | POLDIP2   | polymerase (DNA-directed); delta interacting protein 2                                                                                                                                                                                                                             | -0.8477 | 0      |
| 222426_at   | MAPKAP1   | mitogen-activated protein kinase associated protein 1                                                                                                                                                                                                                              | -0.5462 | 0.0236 |
| 222433_at   | ENAH      | enabled homolog (Drosophila)                                                                                                                                                                                                                                                       | -0.3814 | 0.0437 |
| 222436_s_at | VPS24     | vacuolar protein sorting 24 homolog (S. cerevisiae)                                                                                                                                                                                                                                | -0.5381 | 0.0452 |
| 222438_at   | MED4      | mediator complex subunit 4                                                                                                                                                                                                                                                         | -0.9581 | 0.0002 |
| 222440_s_at | THRAP3    | thyroid hormone receptor associated protein 3                                                                                                                                                                                                                                      | -0.5438 | 0.0001 |
| 222447_at   | METTL9    | methyltransferase like 9                                                                                                                                                                                                                                                           | -0.7488 | 0.0287 |
| 222449_at   | TMEPAI    | transmembrane; prostate androgen induced RNA                                                                                                                                                                                                                                       | -3.1447 | 0      |
| 222450_at   | TMEPAI    | transmembrane; prostate androgen induced RNA                                                                                                                                                                                                                                       | -2.1465 | 0      |
| 222453_at   | CYBRD1    | cytochrome b reductase 1                                                                                                                                                                                                                                                           | -2.5998 | 0      |
| 222454_s_at | PARVA     | parvin; alpha                                                                                                                                                                                                                                                                      | -1.5371 | 0      |

|             |            |                                                                                                              |         |        |
|-------------|------------|--------------------------------------------------------------------------------------------------------------|---------|--------|
| 222455_s_at | PARVA      | parvin; alpha                                                                                                | -1.728  | 0      |
| 222457_s_at | LIMA1      | LIM domain and actin binding 1                                                                               | -1.0113 | 0.0401 |
| 222465_at   | C15orf15   | chromosome 15 open reading frame 15, similar to ribosomal protein L24-like                                   | -0.298  | 0.0437 |
| 222468_at   | KIAA0319L  | KIAA0319-like                                                                                                | -0.3281 | 0.0128 |
| 222469_s_at | TOLLIP     | toll interacting protein                                                                                     | -0.4673 | 0.0348 |
| 222474_s_at | TOMM22     | translocase of outer mitochondrial membrane 22 homolog (yeast)                                               | -0.7642 | 0.0053 |
| 222478_at   | VPS36      | vacuolar protein sorting 36 homolog (S. cerevisiae)                                                          | -1.1143 | 0.0045 |
| 222481_at   | FXC1       | fracture callus 1 homolog (rat)                                                                              | -0.7886 | 0.0102 |
| 222486_s_at | ADAMTS1    | ADAM metalloproteinase with thrombospondin type 1 motif; 1                                                   | -2.0448 | 0      |
| 222490_at   | POLR3E     | polymerase (RNA) III (DNA directed) polypeptide E (80kD)                                                     | -1.149  | 0.0001 |
| 222494_at   | FOXN3      | forkhead box N3                                                                                              | -0.9025 | 0.0005 |
| 222495_at   | C1orf119   | chromosome 1 open reading frame 119, similar to K07F5.15                                                     | -0.4074 | 0.0188 |
| 222496_s_at | FLJ20273   | RNA-binding protein                                                                                          | -0.6944 | 0.0366 |
| 222498_at   | AZI2       | 5-azacytidine induced 2                                                                                      | -0.7282 | 0      |
| 222500_at   | PPIL1      | peptidylprolyl isomerase (cyclophilin)-like 1                                                                | -1.1516 | 0.0002 |
| 222513_s_at | SORBS1     | sorbin and SH3 domain containing 1                                                                           | -0.9521 | 0.0004 |
| 222517_at   | AP3M1      | adaptor-related protein complex 3; mu 1 subunit                                                              | -1.0767 | 0.0026 |
| 222518_at   | ARFGEF2    | ADP-ribosylation factor guanine nucleotide-exchange factor 2 (brefeldin A-inhibited)                         | -0.575  | 0.0104 |
| 222520_s_at | IFT57      | intraflagellar transport 57 homolog (Chlamydomonas)                                                          | -0.6162 | 0      |
| 222521_x_at | NDUFC2     | NADH dehydrogenase (ubiquinone) 1; subcomplex unknown; 2; 14.5kDa                                            | -0.3688 | 0.0091 |
| 222537_s_at | CDC42SE1   | CDC42 small effector 1                                                                                       | -1.1868 | 0.0012 |
| 222541_at   | RSF1       | remodeling and spacing factor 1                                                                              | -1.1252 | 0.0001 |
| 222546_s_at | EPS8L2     | EPS8-like 2                                                                                                  | -0.1537 | 0.0182 |
| 222549_at   | CLDN1      | Claudin 1                                                                                                    | -1.6319 | 0.0252 |
| 222558_at   | P15RS      | hypothetical protein FLJ10656                                                                                | -1.0086 | 0.0048 |
| 222559_s_at | P15RS      | hypothetical protein FLJ10656                                                                                | -1.2171 | 0.0005 |
| 222570_at   | FREQ       | frequenin homolog (Drosophila)                                                                               | -0.8611 | 0.0001 |
| 222571_at   | ST6GALNAC6 | ST6 (alpha-N-acetyl-neuraminy-2,3-beta-galactosyl-1,3)-N-acetylgalactosaminide alpha-2,6-sialyltransferase 6 | -0.6102 | 0.0001 |
| 222572_at   | PPM2C      | protein phosphatase 2C; magnesium-dependent; catalytic subunit                                               | -1.0178 | 0.0009 |
| 222578_s_at | UBE1DC1    | ubiquitin-activating enzyme E1-domain containing 1                                                           | -0.7987 | 0.0126 |
| 222579_at   | UBE1DC1    | ubiquitin-activating enzyme E1-domain containing 1                                                           | -0.7359 | 0.0075 |
| 222580_at   | ZNF644     | zinc finger protein 644                                                                                      | -0.4737 | 0.0215 |

|             |          |                                                                                   |         |        |
|-------------|----------|-----------------------------------------------------------------------------------|---------|--------|
| 222592_s_at | ACSL5    | acyl-CoA synthetase long-chain family member 5                                    | -0.4068 | 0.031  |
| 222603_at   | ERMP1    | endoplasmic reticulum metalloproteinase 1                                         | -1.6264 | 0.0005 |
| 222618_at   | SMU1     | smu-1 suppressor of mec-8 and unc-52 homolog (C. elegans)                         | -0.4203 | 0.0062 |
| 222624_s_at | ZNF639   | zinc finger protein 639                                                           | -0.7318 | 0.0013 |
| 222671_s_at | JMJD4    | jumonji domain containing 4                                                       | -0.3955 | 0      |
| 222672_at   | LYRM4    | LYR motif containing 4                                                            | -0.4493 | 0.0248 |
| 222677_x_at |          |                                                                                   | -0.2281 | 0.0045 |
| 222692_s_at | FNDC3B   | fibronectin type III domain containing 3B                                         | -1.3548 | 0.0005 |
| 222693_at   | FNDC3B   | fibronectin type III domain containing 3B                                         | -0.9669 | 0.0064 |
| 222706_at   | CCDC49   | coiled-coil domain containing 49                                                  | -0.5474 | 0.0001 |
| 222709_at   | ATG7     | ATG7 autophagy related 7 homolog (S. cerevisiae)                                  | -0.4847 | 0.0191 |
| 222710_at   | GMPPB    | GDP-mannose pyrophosphorylase B                                                   | -0.5701 | 0.0059 |
| 222711_s_at | RHBDF1   | rhomboid 5 homolog 1 (Drosophila)                                                 | -0.1862 | 0.0095 |
| 222714_s_at | LACTB2   | lactamase; beta 2                                                                 | -0.9096 | 0.0159 |
| 222717_at   | SDPR     | serum deprivation response (phosphatidylserine binding protein)                   | -1.8654 | 0.0043 |
| 222722_at   | OGN      | osteoglycin                                                                       | -5.2066 | 0      |
| 222730_s_at | ZDHHC2   | zinc finger; DHHC-type containing 2                                               | -1.8917 | 0.004  |
| 222731_at   | ZDHHC2   | zinc finger; DHHC-type containing 2                                               | -2.2423 | 0.0008 |
| 222732_at   | TRIM39   | tripartite motif-containing 39                                                    | -0.3681 | 0.0299 |
| 222734_at   | WARS2    | tryptophanyl tRNA synthetase 2; mitochondrial                                     | -1.13   | 0.008  |
| 222743_s_at | C11orf71 | chromosome 11 open reading frame 71                                               | -0.6373 | 0.0007 |
| 222746_s_at | BSPRY    | B-box and SPRY domain containing                                                  | -0.2561 | 0.0102 |
| 222756_s_at | ARRB1    | arrestin; beta 1                                                                  | -0.6004 | 0.0013 |
| 222783_s_at | SMOC1    | SPARC related modular calcium binding 1                                           | -0.1988 | 0.0057 |
| 222784_at   | SMOC1    | SPARC related modular calcium binding 1                                           | -0.3992 | 0.0003 |
| 222785_x_at | C11orf1  | chromosome 11 open reading frame 1                                                | -0.9753 | 0.0025 |
| 222803_at   | PRTFDC1  | phosphoribosyl transferase domain containing 1                                    | -1.7494 | 0.0044 |
| 222808_at   | ALG13    | asparagine-linked glycosylation 13 homolog (S. cerevisiae)                        | -0.6632 | 0.0136 |
| 222818_at   | OSBPL10  | oxysterol binding protein-like 10                                                 | -0.1397 | 0.0279 |
| 222828_at   | IL20RA   | interleukin 20 receptor; alpha                                                    | -0.1996 | 0.014  |
| 222829_s_at | IL20RA   | interleukin 20 receptor; alpha                                                    | -0.518  | 0.0016 |
| 222840_at   | ATG2B    | ATG2 autophagy related 2 homolog B (S. cerevisiae)                                | -0.3719 | 0.0234 |
| 222857_s_at | KCNMB4   | potassium large conductance calcium-activated channel; subfamily M; beta member 4 | -2.1604 | 0.0249 |
| 222860_s_at | PDGFD    | platelet derived growth factor D                                                  | -1.9751 | 0.0007 |
| 222865_x_at | C16orf30 | chromosome 16 open reading frame 30                                               | -0.171  | 0.0052 |

|             |          |                                                                     |         |        |
|-------------|----------|---------------------------------------------------------------------|---------|--------|
| 222866_s_at | FLVCR2   | feline leukemia virus subgroup C cellular receptor family; member 2 | -1.6518 | 0      |
| 222871_at   | KLHDC8A  | kelch domain containing 8A                                          | -2.3333 | 0.0027 |
| 222876_s_at | CENTA2   | centaurin; alpha 2                                                  | -1.8858 | 0      |
| 222877_at   |          | CDNA: FLJ21027 fis; clone CAE07110                                  | -1.7354 | 0.0011 |
| 222881_at   | HPSE     | heparanase                                                          | -0.8424 | 0      |
| 222885_at   | EMCN     | endomucin                                                           | -2.6498 | 0      |
| 222899_at   | ITGA11   | integrin; alpha 11                                                  | -0.3995 | 0.0104 |
| 222907_x_at | TMEM50B  | transmembrane protein 50B                                           | -0.8876 | 0.0028 |
| 222912_at   | ARRB1    | arrestin; beta 1                                                    | -1.1703 | 0.0002 |
| 222913_at   | KLF3     | Kruppel-like factor 3 (basic)                                       | -0.3293 | 0.0015 |
| 222916_s_at | HDLBP    | high density lipoprotein binding protein (vigilin)                  | -0.9496 | 0.0001 |
| 222924_at   | SLMAP    | sarcolemma associated protein                                       | -0.3574 | 0.0364 |
| 222933_at   | MORN1    | MORN repeat containing 1                                            | -0.1071 | 0.0465 |
| 222934_s_at | CLEC4E   | C-type lectin domain family 4; member E                             | -0.6618 | 0.0161 |
| 222937_s_at | MMP28    | matrix metalloproteinase 28                                         | -0.1787 | 0.0314 |
| 222940_at   | SULT1E1  | sulfotransferase family 1E; estrogen-preferring; member 1           | -1.1168 | 0      |
| 222967_at   | SLC5A7   | solute carrier family 5 (choline transporter); member 7             | -1.24   | 0      |
| 222968_at   |          |                                                                     | -0.3172 | 0.0346 |
| 222980_at   | RAB10    | RAB10; member RAS oncogene family                                   | -0.3156 | 0.0033 |
| 222981_s_at | RAB10    | RAB10; member RAS oncogene family                                   | -0.6297 | 0.0046 |
| 222982_x_at | SLC38A2  | solute carrier family 38; member 2                                  | -0.3856 | 0.0097 |
| 222997_s_at | MRPS21   | mitochondrial ribosomal protein S21                                 | -0.5578 | 0.0003 |
| 223009_at   | C11orf59 | chromosome 11 open reading frame 59                                 | -0.5169 | 0.0001 |
| 223015_at   | EIF2A    | eukaryotic translation initiation factor 2A; 65kDa                  | -0.4205 | 0.0019 |
| 223019_at   | FAM129B  | family with sequence similarity 129; member B                       | -1.0609 | 0.0228 |
| 223027_at   | SNX9     | sorting nexin 9                                                     | -1.0819 | 0      |
| 223030_at   | TRAF7    | TNF receptor-associated factor 7                                    | -0.1215 | 0.0426 |
| 223033_s_at | SCYL1    | SCY1-like 1 (S. cerevisiae)                                         | -0.5232 | 0.0326 |
| 223044_at   | SLC40A1  | solute carrier family 40 (iron-regulated transporter); member 1     | -1.4087 | 0.0002 |
| 223058_at   | FAM107B  | family with sequence similarity 107; member B                       | -2.3592 | 0.0025 |
| 223059_s_at | FAM107B  | family with sequence similarity 107; member B                       | -2.2423 | 0.0036 |
| 223063_at   | C1orf198 | chromosome 1 open reading frame 198                                 | -0.5632 | 0.0059 |
| 223070_at   | SELK     | selenoprotein K                                                     | -0.7446 | 0.0001 |
| 223072_s_at | WBP1     | WW domain binding protein 1                                         | -0.4119 | 0.0029 |
| 223084_s_at | CCNDBP1  | cyclin D-type binding-protein 1                                     | -0.6601 | 0.0323 |
| 223085_at   | RNF19A   | ring finger protein 19A                                             | -0.7891 | 0.0055 |

|             |           |                                                                                    |         |        |
|-------------|-----------|------------------------------------------------------------------------------------|---------|--------|
| 223092_at   | ANKH      | ankylosis; progressive homolog (mouse)                                             | -1.3633 | 0.0032 |
| 223093_at   | ANKH      | ankylosis; progressive homolog (mouse)                                             | -0.4697 | 0.0191 |
| 223103_at   | STARD10   | StAR-related lipid transfer (START) domain containing 10                           | -2.3587 | 0.0013 |
| 223104_at   | JAGN1     | jagunal homolog 1 (Drosophila)                                                     | -0.461  | 0.0419 |
| 223105_s_at | TMEM14B   | transmembrane protein 14B, transmembrane protein 14C                               | -0.4456 | 0.0002 |
| 223106_at   | TMEM14C   | transmembrane protein 14C                                                          | -0.4513 | 0.0004 |
| 223113_at   | TMEM138   | transmembrane protein 138                                                          | -0.6948 | 0.0024 |
| 223115_at   | MED17     | mediator complex subunit 17                                                        | -0.2691 | 0.05   |
| 223117_s_at | USP47     | ubiquitin specific peptidase 47                                                    | -0.6424 | 0.0035 |
| 223119_s_at | USP47     | ubiquitin specific peptidase 47                                                    | -0.59   | 0.0115 |
| 223125_s_at | C1orf21   | chromosome 1 open reading frame 21                                                 | -1.259  | 0.0183 |
| 223126_s_at | C1orf21   | chromosome 1 open reading frame 21                                                 | -2.5205 | 0      |
| 223129_x_at | MYLIP     | myosin regulatory light chain interacting protein                                  | -1.5165 | 0.0003 |
| 223130_s_at | MYLIP     | myosin regulatory light chain interacting protein                                  | -1.8477 | 0.0001 |
| 223133_at   | TMEM14B   | transmembrane protein 14B                                                          | -0.7953 | 0      |
| 223155_at   | HDHD2     | haloacid dehalogenase-like hydrolase domain containing 2                           | -0.4896 | 0.0006 |
| 223167_s_at | USP25     | ubiquitin specific peptidase 25                                                    | -0.6483 | 0.0227 |
| 223170_at   | LOC440181 | hypothetical LOC440181, transmembrane protein 98                                   | -1.6052 | 0.0034 |
| 223176_at   | KCTD20    | potassium channel tetramerisation domain containing 20                             | -1.2421 | 0.0025 |
| 223177_at   | NT5DC1    | 5'-nucleotidase domain containing 1                                                | -0.5608 | 0.0302 |
| 223191_at   | C14orf112 | chromosome 14 open reading frame 112                                               | -0.3952 | 0.0147 |
| 223192_at   | SLC25A28  | solute carrier family 25; member 28                                                | -1.1767 | 0      |
| 223204_at   | C4orf18   | chromosome 4 open reading frame 18                                                 | -0.5911 | 0.042  |
| 223205_s_at | L3MBTL2   | l(3)mbt-like 2 (Drosophila)                                                        | -0.4326 | 0.028  |
| 223211_at   | HACL1     | 2-hydroxyacyl-CoA lyase 1                                                          | -0.6514 | 0.0302 |
| 223217_s_at | NFKBIZ    | nuclear factor of kappa light polypeptide gene enhancer in B-cells inhibitor; zeta | -1.1042 | 0.02   |
| 223218_s_at | NFKBIZ    | nuclear factor of kappa light polypeptide gene enhancer in B-cells inhibitor; zeta | -2.5097 | 0.0001 |
| 223222_at   | SLC25A19  | solute carrier family 25 (mitochondrial thiamine pyrophosphate carrier); member 19 | -2.2897 | 0      |
| 223227_at   | BBS2      | Bardet-Biedl syndrome 2                                                            | -0.6131 | 0.0129 |
| 223228_at   | LDOC1L    | leucine zipper; down-regulated in cancer 1-like                                    | -0.731  | 0.0154 |
| 223230_at   | PRPF38A   | PRP38 pre-mRNA processing factor 38 (yeast) domain containing A                    | -0.6326 | 0.0019 |
| 223235_s_at | SMOC2     | SPARC related modular calcium binding 2                                            | -2.2794 | 0.0002 |
| 223238_s_at | PBRM1     | polybromo 1                                                                        | -0.457  | 0.042  |

|             |           |                                                                                              |         |        |
|-------------|-----------|----------------------------------------------------------------------------------------------|---------|--------|
| 223239_at   | C14orf129 | chromosome 14 open reading frame 129                                                         | -1.1044 | 0.0004 |
| 223264_at   | MESDC1    | mesoderm development candidate 1                                                             | -1.4587 | 0      |
| 223266_at   | ALS2CR2   | amyotrophic lateral sclerosis 2 (juvenile) chromosome region; candidate 2                    | -0.865  | 0.0017 |
| 223267_at   | RG9MTD1   | RNA (guanine-9-) methyltransferase domain containing 1                                       | -0.8507 | 0.0013 |
| 223268_at   | C11orf54  | chromosome 11 open reading frame 54                                                          | -1.6262 | 0      |
| 223269_at   | POLR3GL   | polymerase (RNA) III (DNA directed) polypeptide G (32kD)-like                                | -0.6835 | 0.0004 |
| 223277_at   | TMEM103   | transmembrane protein 103                                                                    | -0.4038 | 0.0254 |
| 223280_x_at | MS4A6A    | membrane-spanning 4-domains; subfamily A; member 6A                                          | -2.6998 | 0      |
| 223299_at   | SEC11C    | SEC11 homolog C ( <i>S. cerevisiae</i> )                                                     | -0.6208 | 0.0463 |
| 223306_at   | EBPL      | emopamil binding protein-like                                                                | -1.0607 | 0.0004 |
| 223309_x_at | PNPLA8    | patatin-like phospholipase domain containing 8                                               | -0.9753 | 0.0028 |
| 223310_x_at | PNPLA8    | patatin-like phospholipase domain containing 8                                               | -0.6874 | 0.0003 |
| 223311_s_at | MTA3      | metastasis associated 1 family; member 3                                                     | -1.6298 | 0      |
| 223321_s_at | FGFRL1    | fibroblast growth factor receptor-like 1                                                     | -1.1251 | 0.0171 |
| 223329_x_at | SUGT1     | SGT1; suppressor of G2 allele of SKP1 ( <i>S. cerevisiae</i> )                               | -0.5542 | 0.0103 |
| 223330_s_at | SUGT1     | SGT1; suppressor of G2 allele of SKP1 ( <i>S. cerevisiae</i> )                               | -1.0311 | 0.0028 |
| 223334_at   | TMEM126A  | transmembrane protein 126A                                                                   | -0.7034 | 0.0084 |
| 223343_at   | MS4A7     | membrane-spanning 4-domains; subfamily A; member 7                                           | -2.6836 | 0.0001 |
| 223344_s_at | MS4A7     | membrane-spanning 4-domains; subfamily A; member 7                                           | -2.342  | 0.0001 |
| 223350_x_at | LIN7C     | lin-7 homolog C ( <i>C. elegans</i> )                                                        | -0.7358 | 0      |
| 223370_at   | PLEKHA3   | pleckstrin homology domain containing; family A (phosphoinositide binding specific) member 3 | -0.547  | 0.0038 |
| 223371_s_at | DNAJC4    | DnaJ (Hsp40) homolog; subfamily C; member 4                                                  | -0.4055 | 0.0003 |
| 223375_at   | TBC1D22B  | TBC1 domain family; member 22B                                                               | -0.9031 | 0      |
| 223380_s_at | LATS2     | LATS; large tumor suppressor; homolog 2 ( <i>Drosophila</i> )                                | -1.0361 | 0.0007 |
| 223386_at   | FAM118B   | family with sequence similarity 118; member B                                                | -0.6693 | 0.0355 |
| 223395_at   | ABI3BP    | ABI gene family; member 3 (NESH) binding protein                                             | -2.2484 | 0.0114 |
| 223405_at   | NPL       | N-acetylneuraminate pyruvate lyase (dihydrodipicolinate synthase)                            | -0.8115 | 0.0252 |
| 223408_s_at |           |                                                                                              | -0.7345 | 0      |
| 223409_at   |           |                                                                                              | -0.3736 | 0.0002 |
| 223410_s_at |           |                                                                                              | -0.3307 | 0      |
| 223411_at   | MIF4GD    | MIF4G domain containing                                                                      | -0.8874 | 0.0209 |
| 223418_x_at | ANKRD13C  | ankyrin repeat domain 13C                                                                    | -0.7583 | 0.0054 |



|             |           |                                                                                 |         |        |
|-------------|-----------|---------------------------------------------------------------------------------|---------|--------|
| 223426_s_at | EPB41L4B  | erythrocyte membrane protein band 4.1 like 4B                                   | -0.191  | 0.025  |
| 223430_at   | SNF1LK2   | SNF1-like kinase 2                                                              | -1.4022 | 0.0006 |
| 223432_at   | OSBP2     | oxysterol binding protein 2                                                     | -0.6668 | 0.0046 |
| 223442_at   | NICN1     | nicolin 1                                                                       | -1.1699 | 0      |
| 223448_x_at | MRPS22    | mitochondrial ribosomal protein S22                                             | -0.6195 | 0.0002 |
| 223449_at   | SEMA6A    | sema domain; transmembrane domain (TM); and cytoplasmic domain; (semaphorin) 6A | -3.8915 | 0      |
| 223459_s_at | C1orf56   | chromosome 1 open reading frame 56                                              | -1.3428 | 0      |
| 223464_at   | OSBPL5    | oxysterol binding protein-like 5                                                | -0.3805 | 0.0001 |
| 223467_at   | RASD1     | RAS; dexamethasone-induced 1                                                    | -2.7572 | 0      |
| 223468_s_at | RGMA      | RGM domain family; member A                                                     | -0.5219 | 0      |
| 223480_s_at | MRPL47    | mitochondrial ribosomal protein L47                                             | -0.3157 | 0.0247 |
| 223482_at   | TMEM120A  | transmembrane protein 120A                                                      | -0.5781 | 0.0315 |
| 223486_at   | GTPBP8    | GTP-binding protein 8 (putative)                                                | -0.6745 | 0.0117 |
| 223503_at   | TMEM163   | transmembrane protein 163                                                       | -1.4121 | 0.0197 |
| 223504_at   | RBJ       | rab and DnaJ domain containing                                                  | -0.5491 | 0.0474 |
| 223509_at   | CLDN2     | claudin 2                                                                       | -0.4768 | 0      |
| 223516_s_at | C6orf49   | chromosome 6 open reading frame 49                                              | -0.3657 | 0.0398 |
| 223520_s_at | KIF13A    | kinesin family member 13A                                                       | -0.3498 | 0.0001 |
| 223523_at   | TMEM108   | transmembrane protein 108                                                       | -1.3234 | 0.0032 |
| 223524_s_at | TMEM108   | transmembrane protein 108                                                       | -2.288  | 0.0002 |
| 223527_s_at | CDADC1    | cytidine and dCMP deaminase domain containing 1                                 | -0.7838 | 0.0417 |
| 223529_at   | SYT4      | synaptotagmin IV                                                                | -0.6918 | 0.0127 |
| 223549_s_at | ESPN      | espin                                                                           | -0.2793 | 0.0131 |
| 223552_at   | LRRC4     | leucine rich repeat containing 4                                                | -1.6698 | 0      |
| 223560_s_at | C2orf56   | chromosome 2 open reading frame 56                                              | -0.9195 | 0.0067 |
| 223576_at   | C6orf203  | chromosome 6 open reading frame 203                                             | -0.5537 | 0.0099 |
| 223582_at   | GPR98     | G protein-coupled receptor 98                                                   | -4.3016 | 0.0001 |
| 223583_at   | TNFAIP8L2 | tumor necrosis factor; alpha-induced protein 8-like 2                           | -0.7237 | 0.0001 |
| 223587_s_at | AMN       | amniotless homolog (mouse)                                                      | -0.1748 | 0.0007 |
| 223598_at   | RAD23B    | RAD23 homolog B (S. cerevisiae)                                                 | -0.6166 | 0.0181 |
| 223603_at   | ZNF179    | zinc finger protein 179                                                         | -0.2233 | 0.0001 |
| 223605_at   | SLC25A18  | solute carrier family 25 (mitochondrial carrier); member 18                     | -0.2841 | 0.0001 |
| 223608_at   | EFCAB2    | EF-hand calcium binding domain 2                                                | -1.0888 | 0.0063 |
| 223611_s_at | LNX1      | ligand of numb-protein X 1                                                      | -0.6181 | 0.0195 |
| 223615_at   | ABI3      | ABI gene family; member 3                                                       | -0.3633 | 0.0084 |
| 223620_at   | GPR34     | G protein-coupled receptor 34                                                   | -2.7171 | 0.0002 |
| 223622_s_at | HYI       | hydroxypyruvate isomerase homolog (E. coli)                                     | -0.7223 | 0.0011 |

|             |          |                                                                                     |         |        |
|-------------|----------|-------------------------------------------------------------------------------------|---------|--------|
| 223623_at   | C2orf40  | chromosome 2 open reading frame 40                                                  | -3.276  | 0      |
| 223624_at   | ANUBL1   | AN1; ubiquitin-like; homolog (Xenopus laevis)                                       | -0.6209 | 0.007  |
| 223631_s_at | C19orf33 | chromosome 19 open reading frame 33                                                 | -1.12   | 0      |
| 223637_s_at | C11orf56 | chromosome 11 open reading frame 56                                                 | -0.5261 | 0.0054 |
| 223640_at   | HCST     | hematopoietic cell signal transducer                                                | -0.7878 | 0.0248 |
| 223647_x_at | HSCB     | HscB iron-sulfur cluster co-chaperone homolog (E. coli)                             | -0.6257 | 0.0134 |
| 223652_at   | AS3MT    | arsenic (+3 oxidation state) methyltransferase, chromosome 10 open reading frame 32 | -2.0687 | 0.0063 |
| 223657_at   | C1orf90  | chromosome 1 open reading frame 90                                                  | -1.1612 | 0.0001 |
| 223658_at   | KCNK6    | potassium channel; subfamily K; member 6                                            | -0.274  | 0.0024 |
| 223659_at   | TMPRSS13 | transmembrane protease; serine 13                                                   | -0.1286 | 0.0101 |
| 223660_at   | ADORA3   | adenosine A3 receptor                                                               | -2.9715 | 0      |
| 223670_s_at | HEMGN    | hemogen                                                                             | -0.1524 | 0.0416 |
| 223681_s_at | INADL    | InaD-like (Drosophila)                                                              | -1.1472 | 0.0017 |
| 223695_s_at | ARSD     | arylsulfatase D                                                                     | -0.6356 | 0.0205 |
| 223696_at   | ARSD     | arylsulfatase D                                                                     | -1.1418 | 0.0002 |
| 223699_at   | CNDP1    | carnosine dipeptidase 1 (metallopeptidase M20 family)                               | -0.113  | 0.0187 |
| 223703_at   | C10orf11 | chromosome 10 open reading frame 11                                                 | -1.8782 | 0.0001 |
| 223710_at   | CCL26    | chemokine (C-C motif) ligand 26                                                     | -0.4117 | 0.0001 |
| 223721_s_at | DNAJC12  | DnaJ (Hsp40) homolog; subfamily C; member 12                                        | -2.9601 | 0      |
| 223722_at   | DNAJC12  | DnaJ (Hsp40) homolog; subfamily C; member 12                                        | -2.5795 | 0      |
| 223727_at   | KCNIP2   | Kv channel interacting protein 2                                                    | -0.4392 | 0.0059 |
| 223745_at   | FBXO31   | F-box protein 31                                                                    | -0.1326 | 0.0421 |
| 223752_at   | CFC1     | cripto; FRL-1; cryptic family 1                                                     | -0.1896 | 0.0008 |
| 223753_s_at | CFC1     | cripto; FRL-1; cryptic family 1, similar to cryptic                                 | -0.1724 | 0.0154 |
| 223754_at   | MGC13057 | hypothetical protein MGC13057                                                       | -0.5908 | 0      |
| 223757_at   | DIO3OS   | deiodinase; iodothyronine; type III opposite strand                                 | -0.2953 | 0.0012 |
| 223767_at   | GPR84    | G protein-coupled receptor 84                                                       | -0.3521 | 0.0007 |
| 223769_x_at | HYI      | hydroxypyruvate isomerase homolog (E. coli)                                         | -0.7041 | 0.0004 |
| 223775_at   | HHIP     | hedgehog interacting protein                                                        | -0.3991 | 0.0122 |
| 223776_x_at | TINF2    | TERF1 (TRF1)-interacting nuclear factor 2                                           | -0.536  | 0.0068 |
| 223778_at   | KIF9     | kinesin family member 9                                                             | -0.2021 | 0.0199 |
| 223800_s_at | LIMS3    | LIM and senescent cell antigen-like domains 3                                       | -1.9517 | 0      |
| 223801_s_at | APOL4    | apolipoprotein L; 4                                                                 | -0.2351 | 0.0066 |

|             |           |                                                                                                                                  |         |        |
|-------------|-----------|----------------------------------------------------------------------------------------------------------------------------------|---------|--------|
| 223808_s_at | NDUFS3    | NADH dehydrogenase (ubiquinone) Fe-S protein 3; 30kDa (NADH-coenzyme Q reductase), protein tyrosine phosphatase; mitochondrial 1 | -1.0551 | 0      |
| 223811_s_at | C7orf20   | chromosome 7 open reading frame 20                                                                                               | -0.5796 | 0.0362 |
| 223812_at   | LOC51252  | hypothetical protein LOC51252                                                                                                    | -0.2049 | 0.037  |
| 223813_at   | PRND      | prion protein 2 (dublet)                                                                                                         | -0.1057 | 0.0055 |
| 223828_s_at | LGALS12   | lectin; galactoside-binding; soluble; 12 (galectin 12)                                                                           | -0.2826 | 0.0003 |
| 223836_at   | FGFBP2    | fibroblast growth factor binding protein 2                                                                                       | -0.2418 | 0.0013 |
| 223843_at   | SCARA3    | scavenger receptor class A; member 3                                                                                             | -0.7132 | 0.0121 |
| 223845_at   | LOC144305 | hypothetical protein BC001437                                                                                                    | -0.4074 | 0.0024 |
| 223873_s_at | VN1R3     | vomeronal 1 receptor 3                                                                                                           | -0.1262 | 0.0045 |
| 223874_at   | ARP11     | actin-related Arp11                                                                                                              | -1.8274 | 0      |
| 223876_at   | SPATA16   | spermatogenesis associated 16                                                                                                    | -0.2245 | 0.0159 |
| 223881_at   | ICA1L     | islet cell autoantigen 1;69kDa-like                                                                                              | -0.1406 | 0.0093 |
| 223884_at   | OPTC      | opticin                                                                                                                          | -0.1764 | 0.0322 |
| 223887_at   | GPR132    | G protein-coupled receptor 132                                                                                                   | -0.2396 | 0.0029 |
| 223895_s_at | EPN3      | epsin 3                                                                                                                          | -1.387  | 0.0002 |
| 223899_at   | PBRM1     | polybromo 1                                                                                                                      | -0.1655 | 0.0164 |
| 223907_s_at | PINX1     | PIN2-interacting protein 1                                                                                                       | -0.3227 | 0.0492 |
| 223910_at   | ERN2      | endoplasmic reticulum to nucleus signaling 2                                                                                     | -0.2577 | 0.0072 |
| 223911_at   | MGC2664   | hypothetical protein MGC2664                                                                                                     | -0.1296 | 0.0442 |
| 223919_at   | P53AIP1   | p53-regulated apoptosis-inducing protein 1                                                                                       | -0.219  | 0.0053 |
| 223922_x_at | MS4A6A    | membrane-spanning 4-domains; subfamily A; member 6A                                                                              | -2.15   | 0      |
| 223923_at   | C21orf62  | chromosome 21 open reading frame 62                                                                                              | -0.1139 | 0.0444 |
| 223938_at   | C1orf49   | chromosome 1 open reading frame 49                                                                                               | -0.1759 | 0.0173 |
| 223944_at   | NLRP12    | NLR family; pyrin domain containing 12                                                                                           | -0.1392 | 0.0383 |
| 223946_at   | MED23     | mediator complex subunit 23                                                                                                      | -0.4241 | 0.0055 |
| 223951_at   | C21orf116 | chromosome 21 open reading frame 116                                                                                             | -0.1671 | 0.0409 |
| 223953_s_at | ZBTB37    | zinc finger and BTB domain containing 37                                                                                         | -0.1704 | 0.0191 |
| 223955_at   | EFCAB4B   | EF-hand calcium binding domain 4B                                                                                                | -0.1058 | 0.01   |
| 223982_s_at | PNPLA8    | patatin-like phospholipase domain containing 8                                                                                   | -0.8109 | 0      |
| 223986_x_at | DMRT2     | doublesex and mab-3 related transcription factor 2                                                                               | -0.1271 | 0.0155 |
| 223992_x_at | ZCWPW1    | zinc finger; CW type with PWWP domain 1                                                                                          | -0.1762 | 0.008  |
| 224000_at   | C2orf16   | chromosome 2 open reading frame 16                                                                                               | -0.1822 | 0.0441 |
| 224007_at   | HSFY1     | heat shock transcription factor; Y linked 2, heat shock transcription factor; Y-linked 1                                         | -0.1955 | 0.01   |

|             |              |                                                                                                  |         |        |
|-------------|--------------|--------------------------------------------------------------------------------------------------|---------|--------|
| 224011_at   |              | CDNA clone IMAGE:3446313                                                                         | -0.2135 | 0.0072 |
| 224019_at   | SCD5         | stearoyl-CoA desaturase 5                                                                        | -0.1625 | 0.0034 |
| 224023_s_at | C3orf10      | chromosome 3 open reading frame 10                                                               | -0.2375 | 0.0037 |
| 224042_at   | UPB1         | ureidopropionase; beta                                                                           | -0.1032 | 0.0334 |
| 224051_at   |              |                                                                                                  | -0.1434 | 0.0162 |
| 224054_at   |              |                                                                                                  | -0.1673 | 0.0138 |
| 224061_at   | INMT         | indolethylamine N-methyltransferase                                                              | -4.6695 | 0      |
| 224066_s_at | HIPK2        | homeodomain interacting protein kinase 2                                                         | -0.1235 | 0.0074 |
| 224074_at   | VSX1         | visual system homeobox 1                                                                         | -0.2029 | 0.0003 |
| 224087_at   |              |                                                                                                  | -0.1732 | 0.0376 |
| 224088_at   | NMUR2        | neuromedin U receptor 2                                                                          | -0.1153 | 0.0242 |
| 224093_at   | IFNK         | interferon; kappa                                                                                | -0.1299 | 0.0062 |
| 224108_at   |              |                                                                                                  | -0.1107 | 0.0194 |
| 224112_at   |              | Clone FLC0461 PRO2812                                                                            | -0.131  | 0.0118 |
| 224117_at   | LOC284912    | hypothetical gene supported by BC001801                                                          | -0.1601 | 0.0253 |
| 224119_at   |              | CDNA clone IMAGE:3139291                                                                         | -0.1058 | 0.0415 |
| 224122_at   |              |                                                                                                  | -0.1397 | 0.0411 |
| 224123_at   | DKFZp434F142 | hypothetical protein DKFZp434F142                                                                | -0.1232 | 0.0303 |
| 224129_s_at | HDPY-30      | dpy-30-like protein                                                                              | -0.3078 | 0.0124 |
| 224151_s_at | AK3          | adenylate kinase 3                                                                               | -0.6732 | 0.0012 |
| 224156_x_at | IL17RB       | interleukin 17 receptor B                                                                        | -0.2402 | 0.0028 |
| 224157_at   | KAAG1        | kidney associated antigen 1                                                                      | -0.1532 | 0.0041 |
| 224160_s_at | ACAD9        | acyl-Coenzyme A dehydrogenase family; member 9                                                   | -0.7005 | 0.0032 |
| 224174_at   | TTY11        | testis-specific transcript; Y-linked 11                                                          | -0.1223 | 0.0179 |
| 224175_s_at | TRIM34       | tripartite motif-containing 34, tripartite motif-containing 6 and tripartite motif-containing 34 | -0.2685 | 0.0213 |
| 224178_s_at | SOX6         | SRY (sex determining region Y)-box 6                                                             | -0.2088 | 0.001  |
| 224184_s_at | BOC          | Boc homolog (mouse)                                                                              | -0.7516 | 0      |
| 224197_s_at | C1QTNF1      | C1q and tumor necrosis factor related protein 1                                                  | -0.75   | 0      |
| 224198_at   | ELA1         | elastase 1; pancreatic                                                                           | -0.6685 | 0      |
| 224207_x_at | MMP28        | matrix metalloproteinase 28                                                                      | -0.3603 | 0.0016 |
| 224208_at   | PLEKHA8      | pleckstrin homology domain containing; family A (phosphoinositide binding specific) member 8     | -0.1309 | 0.0198 |
| 224215_s_at | DLL1         | delta-like 1 (Drosophila)                                                                        | -1.4943 | 0.0039 |
| 224235_at   |              |                                                                                                  | -0.2326 | 0.0034 |
| 224238_at   |              |                                                                                                  | -0.2063 | 0.0045 |
| 224245_at   | INGX         | inhibitor of growth family; X-linked; pseudogene                                                 | -0.1496 | 0.0251 |
| 224256_at   |              | Full length insert cDNA clone YB31B05                                                            | -0.185  | 0.0088 |

|             |         |                                                           |         |        |
|-------------|---------|-----------------------------------------------------------|---------|--------|
| 224261_at   |         | PRO3098                                                   | -0.4996 | 0.0109 |
| 224273_at   | C3orf20 | chromosome 3 open reading frame 20                        | -0.2213 | 0.0013 |
| 224280_s_at | FAM54B  | family with sequence similarity 54; member B              | -0.5338 | 0.0111 |
| 224283_x_at | IL18BP  | interleukin 18 binding protein                            | -0.2036 | 0.0038 |
| 224291_at   | CACNG6  | calcium channel; voltage-dependent; gamma subunit 6       | -0.1056 | 0.0236 |
| 224309_s_at | SUGT1   | SGT1; suppressor of G2 allele of SKP1 (S. cerevisiae)     | -0.5799 | 0.0106 |
| 224324_at   | MRO     | maestro                                                   | -0.2181 | 0.0026 |
| 224330_s_at | MRPL27  | mitochondrial ribosomal protein L27                       | -0.4332 | 0.0047 |
| 224336_s_at | DUSP16  | dual specificity phosphatase 16                           | -0.9577 | 0.0302 |
| 224339_s_at | ANGPTL1 | angiopoietin-like 1                                       | -3.0973 | 0      |
| 224341_x_at | TLR4    | toll-like receptor 4                                      | -1.973  | 0      |
| 224346_at   |         |                                                           | -0.1622 | 0.0258 |
| 224348_s_at |         |                                                           | -0.8511 | 0      |
| 224356_x_at | MS4A6A  | membrane-spanning 4-domains; subfamily A; member 6A       | -2.874  | 0      |
| 224357_s_at | MS4A4A  | membrane-spanning 4-domains; subfamily A; member 4        | -1.5645 | 0      |
| 224358_s_at | MS4A7   | membrane-spanning 4-domains; subfamily A; member 7        | -1.4114 | 0.0001 |
| 224360_s_at | PACSIN1 | protein kinase C and casein kinase substrate in neurons 1 | -0.125  | 0.0287 |
| 224361_s_at | IL17RB  | interleukin 17 receptor B                                 | -0.2117 | 0.0009 |
| 224379_at   | FTHL17  | ferritin; heavy polypeptide-like 17                       | -0.2275 | 0      |
| 224390_s_at | RGS8    | regulator of G-protein signaling 8                        | -0.16   | 0.0068 |
| 224391_s_at | SIAE    | sialic acid acetyltransferase                             | -1.1284 | 0.0124 |
| 224393_s_at | CECR6   | cat eye syndrome chromosome region; candidate 6           | -0.2072 | 0.0126 |
| 224415_s_at | HINT2   | histidine triad nucleotide binding protein 2              | -0.7619 | 0.0072 |
| 224432_at   | SH3GLB2 | SH3-domain GRB2-like endophilin B2                        | -0.1532 | 0.0243 |
| 224443_at   | C1orf97 | chromosome 1 open reading frame 97                        | -0.7598 | 0.0258 |
| 224444_s_at | C1orf97 | chromosome 1 open reading frame 97                        | -0.6141 | 0.0043 |
| 224445_s_at | ZFYVE21 | zinc finger; FYVE domain containing 21                    | -0.7165 | 0.0137 |
| 224449_at   | DDI2    | DDI1; DNA-damage inducible 1; homolog 2 (S. cerevisiae)   | -0.1418 | 0.0047 |
| 224450_s_at | RIOK1   | RIO kinase 1 (yeast)                                      | -0.4037 | 0.0194 |
| 224454_at   | ETNK1   | ethanolamine kinase 1                                     | -0.1297 | 0.0309 |
| 224475_at   |         |                                                           | -0.1613 | 0.0131 |
| 224488_s_at | SPON1   | spondin 1; extracellular matrix protein                   | -0.2691 | 0.0008 |
| 224500_s_at | MON1A   | MON1 homolog A (yeast)                                    | -0.4651 | 0.0418 |
| 224512_s_at | LSMD1   | LSM domain containing 1                                   | -0.549  | 0.0006 |
| 224522_s_at | DCAKD   | dephospho-CoA kinase domain containing                    | -0.6279 | 0.0028 |
| 224523_s_at | C3orf26 | chromosome 3 open reading frame 26                        | -0.5197 | 0.0086 |

|             |          |                                                                                   |         |        |
|-------------|----------|-----------------------------------------------------------------------------------|---------|--------|
| 224537_at   | PCDHGC5  | protocadherin gamma subfamily C; 5                                                | -0.1093 | 0.0362 |
| 224538_s_at | PARD6G   | par-6 partitioning defective 6 homolog gamma (C. elegans)                         | -0.1556 | 0.0053 |
| 224543_at   | SVEP1    | sushi; von Willebrand factor type A; EGF and pentraxin domain containing 1        | -0.1708 | 0.0413 |
| 224548_at   | HES7     | hairy and enhancer of split 7 (Drosophila)                                        | -0.2261 | 0.0361 |
| 224552_s_at | KCNK4    | potassium channel; subfamily K; member 4                                          | -0.1919 | 0.0004 |
| 224560_at   | TIMP2    | TIMP metalloproteinase inhibitor 2                                                | -1.0918 | 0.0165 |
| 224573_at   | MGC71993 | similar to DNA segment; Chr 11; Brigham & Womens Genetics 0434 expressed          | -0.3219 | 0.0024 |
| 224622_at   | TBC1D14  | TBC1 domain family; member 14                                                     | -0.4404 | 0.0109 |
| 224633_s_at | GPATCH4  | G patch domain containing 4                                                       | -0.2117 | 0.0071 |
| 224635_s_at | BIRC6    | baculoviral IAP repeat-containing 6 (apollon)                                     | -0.4006 | 0.0171 |
| 224646_x_at | H19      | H19; imprinted maternally expressed untranslated mRNA                             | -4.8514 | 0      |
| 224654_at   | DDX21    | DEAD (Asp-Glu-Ala-Asp) box polypeptide 21                                         | -0.3967 | 0.0409 |
| 224655_at   | AK3      | adenylate kinase 3                                                                | -0.5186 | 0      |
| 224657_at   | ERRFI1   | ERBB receptor feedback inhibitor 1                                                | -1.6542 | 0.0003 |
| 224658_x_at | PACS1    | phosphofurin acidic cluster sorting protein 1                                     | -0.3803 | 0.0196 |
| 224659_at   | SEPN1    | selenoprotein N; 1                                                                | -0.5915 | 0.0011 |
| 224660_at   | PIGY     | phosphatidylinositol glycan anchor biosynthesis; class Y                          | -0.3135 | 0.009  |
| 224666_at   | NSMCE1   | non-SMC element 1 homolog (S. cerevisiae)                                         | -0.7455 | 0.0054 |
| 224672_x_at | MESDC2   | mesoderm development candidate 2                                                  | -0.4013 | 0.0014 |
| 224677_x_at | C11orf31 | chromosome 11 open reading frame 31                                               | -0.4138 | 0.0168 |
| 224679_at   | MESDC2   | mesoderm development candidate 2                                                  | -0.431  | 0.0411 |
| 224683_at   | FBXO18   | F-box protein; helicase; 18                                                       | -0.4633 | 0.0026 |
| 224694_at   | ANTXR1   | anthrax toxin receptor 1                                                          | -1.3392 | 0.002  |
| 224698_at   | FAM62B   | family with sequence similarity 62 (C2 domain containing) member B                | -0.4449 | 0.0069 |
| 224700_at   | STT3B    | STT3; subunit of the oligosaccharyltransferase complex; homolog B (S. cerevisiae) | -0.415  | 0.0103 |
| 224707_at   | C5orf32  | chromosome 5 open reading frame 32                                                | -0.6966 | 0.0409 |
| 224710_at   | RAB34    | RAB34; member RAS oncogene family                                                 | -3.6311 | 0      |
| 224729_s_at | ATPAF1   | ATP synthase mitochondrial F1 complex assembly factor 1                           | -0.7919 | 0.0007 |
| 224735_at   | CYBASC3  | cytochrome b; ascorbate dependent 3                                               | -2.1209 | 0      |
| 224746_at   | KIAA1522 | KIAA1522                                                                          | -0.8634 | 0.0194 |
| 224750_at   | RNF185   | ring finger protein 185                                                           | -0.4716 | 0.0305 |
| 224755_at   | TM9SF3   | transmembrane 9 superfamily member 3                                              | -0.9806 | 0.0018 |

|             |              |                                                                                                |         |        |
|-------------|--------------|------------------------------------------------------------------------------------------------|---------|--------|
| 224764_at   | ARHGAP21     | Rho GTPase activating protein 21                                                               | -0.7791 | 0.0015 |
| 224780_at   | RBM17        | RNA binding motif protein 17                                                                   | -0.6473 | 0.0179 |
| 224784_at   | MLLT6        | myeloid/lymphoid or mixed-lineage leukemia (trithorax homolog; Drosophila); translocated to; 6 | -0.8151 | 0.0001 |
| 224789_at   | WDR40A       | WD repeat domain 40A                                                                           | -0.5405 | 0.0046 |
| 224799_at   | NDFIP2       | Nedd4 family interacting protein 2                                                             | -0.9061 | 0.0079 |
| 224801_at   | NDFIP2       | Nedd4 family interacting protein 2                                                             | -0.726  | 0.0478 |
| 224802_at   | NDFIP2       | Nedd4 family interacting protein 2                                                             | -1.0043 | 0.0049 |
| 224808_s_at | C7orf20      | chromosome 7 open reading frame 20                                                             | -0.6463 | 0.0025 |
| 224809_x_at | TINF2        | TERF1 (TRF1)-interacting nuclear factor 2                                                      | -0.5139 | 0.0082 |
| 224811_at   |              | CDNA FLJ30652 fis; clone DFNES2000011                                                          | -1.0207 | 0      |
| 224812_at   | HIBADH       | 3-hydroxyisobutyrate dehydrogenase                                                             | -0.586  | 0.0051 |
| 224816_at   | C7orf20      | Chromosome 7 open reading frame 20                                                             | -1.17   | 0      |
| 224817_at   | SH3PXD2A     | SH3 and PX domains 2A                                                                          | -1.42   | 0.0003 |
| 224820_at   | FAM36A       | family with sequence similarity 36; member A                                                   | -0.9877 | 0.0016 |
| 224821_at   | ABHD14B      | abhydrolase domain containing 14B                                                              | -1.1432 | 0.0056 |
| 224823_at   | MYLK         | myosin; light chain kinase                                                                     | -3.3193 | 0      |
| 224826_at   | RP5-1022P6.2 | hypothetical protein KIAA1434                                                                  | -0.9485 | 0.0184 |
| 224831_at   | CPEB4        | cytoplasmic polyadenylation element binding protein 4                                          | -0.448  | 0.0433 |
| 224833_at   | ETS1         | v-ets erythroblastosis virus E26 oncogene homolog 1 (avian)                                    | -0.7991 | 0.0018 |
| 224840_at   | FKBP5        | FK506 binding protein 5                                                                        | -0.8225 | 0.0391 |
| 224861_at   | GNAQ         | Guanine nucleotide binding protein (G protein); q polypeptide                                  | -0.9397 | 0      |
| 224862_at   | GNAQ         | Guanine nucleotide binding protein (G protein); q polypeptide                                  | -0.7582 | 0.0007 |
| 224865_at   | MLSTD2       | male sterility domain containing 2                                                             | -0.6231 | 0.0377 |
| 224871_at   | FAM79A       | family with sequence similarity 79; member A                                                   | -0.6344 | 0.0099 |
| 224887_at   | GNPTG        | N-acetylglucosamine-1-phosphate transferase; gamma subunit                                     | -0.6114 | 0.0223 |
| 224900_at   | ANKFY1       | ankyrin repeat and FYVE domain containing 1                                                    | -0.5275 | 0.0143 |
| 224901_at   | SCD5         | stearoyl-CoA desaturase 5                                                                      | -1.0111 | 0.0317 |
| 224906_at   | TMEM16F      | transmembrane protein 16F                                                                      | -0.5528 | 0.0119 |
| 224912_at   | TTC7A        | tetratricopeptide repeat domain 7A                                                             | -0.918  | 0.0002 |
| 224916_at   | TMEM173      | transmembrane protein 173                                                                      | -0.8937 | 0.0022 |
| 224918_x_at | MGST1        | microsomal glutathione S-transferase 1                                                         | -1.9818 | 0.0436 |
| 224923_at   | TTC7A        | tetratricopeptide repeat domain 7A                                                             | -0.936  | 0      |
| 224924_at   | TTC7A        | tetratricopeptide repeat domain 7A                                                             | -0.4516 | 0.0001 |
| 224928_at   | SETD7        | SET domain containing (lysine methyltransferase) 7                                             | -0.8088 | 0.0049 |
| 224929_at   | TMEM173      | transmembrane protein 173                                                                      | -1.4946 | 0      |

|             |          |                                                                         |         |        |
|-------------|----------|-------------------------------------------------------------------------|---------|--------|
| 224937_at   | PTGFRN   | prostaglandin F2 receptor negative regulator                            | -1.2177 | 0.0246 |
| 224940_s_at | PAPPA    | pregnancy-associated plasma protein A; pappalysin 1                     | -1.8315 | 0.0069 |
| 224958_at   | NUFIP2   | nuclear fragile X mental retardation protein interacting protein 2      | -0.5532 | 0.0108 |
| 224964_s_at | GNG2     | guanine nucleotide binding protein (G protein); gamma 2                 | -1.9836 | 0.0013 |
| 224970_at   | NFIA     | nuclear factor I/A                                                      | -1.0771 | 0.0001 |
| 224975_at   | NFIA     | nuclear factor I/A                                                      | -1.1254 | 0      |
| 224976_at   | NFIA     | nuclear factor I/A                                                      | -1.2079 | 0.0041 |
| 224978_s_at | USP36    | ubiquitin specific peptidase 36                                         | -1.5984 | 0      |
| 224979_s_at | USP36    | ubiquitin specific peptidase 36                                         | -0.4938 | 0.0024 |
| 224989_at   |          | Full-length cDNA clone CS0DE011YO20 of Placenta of Homo sapiens (human) | -0.844  | 0.0183 |
| 224990_at   | C4orf34  | chromosome 4 open reading frame 34                                      | -0.874  | 0.001  |
| 224995_at   | SPIRE1   | spire homolog 1 (Drosophila)                                            | -0.7206 | 0.0002 |
| 224997_x_at | H19      | H19; imprinted maternally expressed untranslated mRNA                   | -4.2894 | 0      |
| 225003_at   | MGC3205  | MBC3205, hypothetical protein MGC3205                                   | -0.5401 | 0.0338 |
| 225012_at   | HDLBP    | high density lipoprotein binding protein (vigilin)                      | -1.6507 | 0      |
| 225013_at   | LZTS2    | leucine zipper; putative tumor suppressor 2                             | -0.115  | 0.0198 |
| 225016_at   | APCDD1   | adenomatosis polyposis coli down-regulated 1                            | -2.0703 | 0.0174 |
| 225032_at   | FNDC3B   | fibronectin type III domain containing 3B                               | -0.6709 | 0.0003 |
| 225044_at   | NT5C3L   | 5'-nucleotidase; cytosolic III-like                                     | -0.5673 | 0.0401 |
| 225048_at   | PHF10    | PHD finger protein 10                                                   | -0.9248 | 0.0012 |
| 225055_at   |          | Homo sapiens; clone IMAGE:3345917; mRNA                                 | -0.4829 | 0.0458 |
| 225065_x_at | C17orf45 | chromosome 17 open reading frame 45                                     | -1.5016 | 0.0008 |
| 225069_at   | PCYT1A   | Phosphate cytidylyltransferase 1; choline; alpha                        | -0.5878 | 0.0062 |
| 225070_at   | NUS1     | nuclear undecaprenyl pyrophosphate synthase 1 homolog (S. cerevisiae)   | -0.81   | 0.0091 |
| 225083_at   | GTF3C6   | general transcription factor IIIC; polypeptide 6; alpha 35kDa           | -0.3343 | 0.0033 |
| 225093_at   | UTRN     | utrophin                                                                | -0.7524 | 0.0007 |
| 225095_at   | SPTLC2   | Serine palmitoyltransferase; long chain base subunit 2                  | -0.5626 | 0.0404 |
| 225108_at   | HEATR2   | HEAT repeat containing 2                                                | -1.5604 | 0.0015 |
| 225110_at   | OGFOD1   | 2-oxoglutarate and iron-dependent oxygenase domain containing 1         | -0.3513 | 0.0499 |
| 225121_at   | TBC1D23  | TBC1 domain family; member 23                                           | -0.9103 | 0.0004 |
| 225122_at   | RNF31    | ring finger protein 31                                                  | -0.1802 | 0.0057 |
| 225124_at   | PPP1R9B  | protein phosphatase 1; regulatory (inhibitor) subunit 9B                | -0.9048 | 0.002  |
| 225130_at   | ZRANB1   | zinc finger; RAN-binding domain containing 1                            | -1.5157 | 0.0003 |



|             |           |                                                                                                                 |         |        |
|-------------|-----------|-----------------------------------------------------------------------------------------------------------------|---------|--------|
| 225131_at   | ZRANB1    | zinc finger; RAN-binding domain containing 1                                                                    | -1.7393 | 0      |
| 225132_at   | FBXL3     | F-box and leucine-rich repeat protein 3                                                                         | -0.7765 | 0.0004 |
| 225138_at   | ZRANB1    | zinc finger; RAN-binding domain containing 1                                                                    | -1.6644 | 0      |
| 225144_at   | BMPR2     | bone morphogenetic protein receptor; type II (serine/threonine kinase)                                          | -0.9705 | 0      |
| 225148_at   | RPS19BP1  | ribosomal protein S19 binding protein 1                                                                         | -1.004  | 0.0022 |
| 225151_at   | RTKN      | rhotekin                                                                                                        | -0.1289 | 0.034  |
| 225162_at   | SH3D19    | SH3 domain protein D19                                                                                          | -2.7992 | 0      |
| 225165_at   | PPP1R1B   | protein phosphatase 1; regulatory (inhibitor) subunit 1B (dopamine and cAMP regulated phosphoprotein; DARPP-32) | -0.5681 | 0.0024 |
| 225166_at   | ARHGAP18  | Rho GTPase activating protein 18                                                                                | -1.9895 | 0      |
| 225171_at   | ARHGAP18  | Rho GTPase activating protein 18                                                                                | -0.858  | 0.0012 |
| 225173_at   | ARHGAP18  | Rho GTPase activating protein 18                                                                                | -0.9403 | 0.0129 |
| 225177_at   | RAB11FIP1 | RAB11 family interacting protein 1 (class I)                                                                    | -0.5064 | 0.0478 |
| 225182_at   | TMEM50B   | transmembrane protein 50B                                                                                       | -0.9654 | 0.0008 |
| 225185_at   | MRAS      | muscle RAS oncogene homolog                                                                                     | -1.978  | 0.0002 |
| 225186_at   | RAPH1     | Ras association (RalGDS/AF-6) and pleckstrin homology domains 1                                                 | -0.7792 | 0.0001 |
| 225188_at   | RAPH1     | Ras association (RalGDS/AF-6) and pleckstrin homology domains 1                                                 | -2.3751 | 0      |
| 225189_s_at | RAPH1     | Ras association (RalGDS/AF-6) and pleckstrin homology domains 1                                                 | -2.1005 | 0      |
| 225190_x_at | RPL35A    | ribosomal protein L35a                                                                                          | -0.2768 | 0.0009 |
| 225206_s_at | MTRF1L    | mitochondrial translational release factor 1-like                                                               | -0.5005 | 0.0037 |
| 225207_at   | PKD4      | pyruvate dehydrogenase kinase; isozyme 4                                                                        | -0.8915 | 0.0316 |
| 225212_at   | SLC25A25  | solute carrier family 25 (mitochondrial carrier; phosphate carrier); member 25                                  | -2.0204 | 0      |
| 225213_at   | PPTC7     | PTC7 protein phosphatase homolog (S. cerevisiae)                                                                | -0.5992 | 0.0115 |
| 225225_at   | KRTAP4-7  | Keratin associated protein 4-7                                                                                  | -0.4843 | 0.0201 |
| 225227_at   |           | CDNA clone IMAGE:5299642                                                                                        | -0.6912 | 0.0416 |
| 225228_at   | TMEM77    | transmembrane protein 77                                                                                        | -0.7074 | 0.0036 |
| 225231_at   | CBL       | Cas-Br-M (murine) ecotropic retroviral transforming sequence                                                    | -1.0534 | 0.0006 |
| 225238_at   | MSI2      | musashi homolog 2 (Drosophila)                                                                                  | -1.0743 | 0.0069 |
| 225240_s_at | MSI2      | musashi homolog 2 (Drosophila)                                                                                  | -0.8181 | 0.0034 |
| 225243_s_at | SLMAP     | sarcolemma associated protein                                                                                   | -0.3897 | 0.0207 |
| 225244_at   | C1orf142  | chromosome 1 open reading frame 142                                                                             | -1.0427 | 0      |
| 225255_at   | MRPL35    | mitochondrial ribosomal protein L35                                                                             | -0.4932 | 0.0097 |
| 225258_at   | FBLIM1    | filamin binding LIM protein 1                                                                                   | -1.7133 | 0.0001 |
| 225262_at   | FOSL2     | FOS-like antigen 2                                                                                              | -1.8624 | 0      |

|             |          |                                                                                                                                                                                                                                                                      |         |        |
|-------------|----------|----------------------------------------------------------------------------------------------------------------------------------------------------------------------------------------------------------------------------------------------------------------------|---------|--------|
| 225263_at   | HS6ST1   | heparan sulfate 6-O-sulfotransferase 1                                                                                                                                                                                                                               | -1.2203 | 0.0019 |
| 225264_at   | RARS2    | arginyl-tRNA synthetase 2; mitochondrial (putative)                                                                                                                                                                                                                  | -0.8531 | 0.0028 |
| 225272_at   | SAT2     | spermidine/spermine N1-acetyltransferase 2                                                                                                                                                                                                                           | -0.8043 | 0.0005 |
| 225273_at   | WWC3     | WWC family member 3                                                                                                                                                                                                                                                  | -0.9757 | 0.0031 |
| 225275_at   | EDIL3    | EGF-like repeats and discoidin I-like domains 3                                                                                                                                                                                                                      | -2.4998 | 0.0014 |
| 225280_x_at | ARSD     | arylsulfatase D                                                                                                                                                                                                                                                      | -0.7709 | 0.0018 |
| 225282_at   | SMAP1L   | stromal membrane-associated protein 1-like                                                                                                                                                                                                                           | -0.644  | 0.014  |
| 225284_at   | DNAJC3   | DnaJ (Hsp40) homolog; subfamily C; member 3, hypothetical protein LOC144871                                                                                                                                                                                          | -0.8212 | 0.0025 |
| 225286_at   | ARSD     | arylsulfatase D                                                                                                                                                                                                                                                      | -1.5023 | 0      |
| 225289_at   | STAT3    | signal transducer and activator of transcription 3 (acute-phase response factor)                                                                                                                                                                                     | -0.6892 | 0.0043 |
| 225298_at   | PNKD     | paroxysmal nonkinesigenic dyskinesia                                                                                                                                                                                                                                 | -1.2768 | 0      |
| 225302_at   | TXNDC10  | thioredoxin domain containing 10                                                                                                                                                                                                                                     | -0.4437 | 0.0402 |
| 225303_at   | KIRREL   | kin of IRRE like (Drosophila)                                                                                                                                                                                                                                        | -1.8133 | 0      |
| 225305_at   | SLC25A29 | solute carrier family 25; member 29                                                                                                                                                                                                                                  | -1.0546 | 0.0002 |
| 225306_s_at | SLC25A29 | solute carrier family 25; member 29                                                                                                                                                                                                                                  | -1.2691 | 0.0001 |
| 225308_s_at | TANC1    | tetratricopeptide repeat; ankyrin repeat and coiled-coil containing 1                                                                                                                                                                                                | -0.8768 | 0.0104 |
| 225311_at   | IVD      | isovaleryl Coenzyme A dehydrogenase                                                                                                                                                                                                                                  | -1.0474 | 0.0044 |
| 225312_at   | COMMD6   | COMM domain containing 6                                                                                                                                                                                                                                             | -0.7028 | 0      |
| 225325_at   | FLJ20160 | FLJ20160 protein                                                                                                                                                                                                                                                     | -0.9483 | 0.0367 |
| 225330_at   | IGF1R    | insulin-like growth factor 1 receptor                                                                                                                                                                                                                                | -1.1134 | 0.0176 |
| 225334_at   | C10orf32 | chromosome 10 open reading frame 32                                                                                                                                                                                                                                  | -0.4197 | 0.0111 |
| 225338_at   | ZYG11B   | zyg-11 homolog B (C. elegans)                                                                                                                                                                                                                                        | -0.456  | 0.0017 |
| 225344_at   | NCOA7    | nuclear receptor coactivator 7                                                                                                                                                                                                                                       | -0.9871 | 0      |
| 225348_at   | FUSIP1   | FUS interacting protein (serine/arginine-rich) 1, similar to FUS-interacting serine-arginine-rich protein 1 (TLS-associated protein with Ser-Arg repeats) (TASR) (TLS-associated serine-arginine protein) (TLS-associated SR protein) (Neural-specific SR protein... | -0.9166 | 0.0248 |
| 225352_at   | TLOC1    | translocation protein 1                                                                                                                                                                                                                                              | -0.4488 | 0.0243 |
| 225353_s_at | C1QC     | complement component 1; q subcomponent; C chain                                                                                                                                                                                                                      | -1.8714 | 0.0005 |
| 225354_s_at | SH3BGR2  | SH3 domain binding glutamic acid-rich protein like 2                                                                                                                                                                                                                 | -0.6041 | 0.0174 |
| 225358_at   | DNAJC19  | DnaJ (Hsp40) homolog; subfamily C; member 19                                                                                                                                                                                                                         | -0.5537 | 0.037  |
| 225359_at   | DNAJC19  | DnaJ (Hsp40) homolog; subfamily C; member 19                                                                                                                                                                                                                         | -0.7359 | 0.0065 |

|             |             |                                                                                                     |         |        |
|-------------|-------------|-----------------------------------------------------------------------------------------------------|---------|--------|
| 225363_at   | PTEN        | phosphatase and tensin homolog (mutated in multiple advanced cancers 1)                             | -0.4745 | 0.0217 |
| 225367_at   | PGM2        | phosphoglucomutase 2                                                                                | -0.6226 | 0.034  |
| 225372_at   | C10orf54    | chromosome 10 open reading frame 54                                                                 | -0.4706 | 0      |
| 225373_at   | C10orf54    | chromosome 10 open reading frame 54                                                                 | -0.9746 | 0.0044 |
| 225375_at   | C17orf32    | chromosome 17 open reading frame 32                                                                 | -0.7106 | 0.0022 |
| 225381_at   | LOC399959   | hypothetical gene supported by BX647608                                                             | -2.5982 | 0.0008 |
| 225390_s_at | KLF13       | Kruppel-like factor 13                                                                              | -1.1443 | 0.0102 |
| 225396_at   |             | CDNA FLJ31794 fis; clone NT2RI2008808                                                               | -0.6955 | 0.0202 |
| 225404_at   | C1orf212    | chromosome 1 open reading frame 212                                                                 | -0.9548 | 0.0002 |
| 225407_at   | MBP         | myelin basic protein                                                                                | -0.6668 | 0.0113 |
| 225420_at   | GPAM        | glycerol-3-phosphate acyltransferase; mitochondrial                                                 | -1.2166 | 0.0293 |
| 225424_at   | GPAM        | glycerol-3-phosphate acyltransferase; mitochondrial                                                 | -1.4297 | 0.0142 |
| 225427_s_at | APOA1BP     | apolipoprotein A-I binding protein                                                                  | -0.559  | 0.0135 |
| 225435_at   | SSR1        | Signal sequence receptor; alpha (translocon-associated protein alpha)                               | -0.9221 | 0.025  |
| 225441_x_at | LSMD1       | LSM domain containing 1                                                                             | -0.4862 | 0.0019 |
| 225442_at   | DDR2        | Discoidin domain receptor family; member 2                                                          | -1.6955 | 0.0136 |
| 225448_at   | NAPG        | N-ethylmaleimide-sensitive factor attachment protein; gamma                                         | -0.6922 | 0.0001 |
| 225464_at   | FRMD6       | FERM domain containing 6                                                                            | -1.9546 | 0.0009 |
| 225475_at   | MIER1       | mesoderm induction early response 1 homolog (Xenopus laevis)                                        | -0.8881 | 0.0002 |
| 225479_at   | LRRC58      | leucine rich repeat containing 58                                                                   | -1.1061 | 0      |
| 225481_at   | FRMD6       | FERM domain containing 6                                                                            | -1.8332 | 0.0006 |
| 225491_at   | SLC1A2      | solute carrier family 1 (glial high affinity glutamate transporter); member 2                       | -3.4488 | 0      |
| 225494_at   |             | Transcribed locus; strongly similar to XP_530050.1 hypothetical protein XP_530050 [Pan troglodytes] | -0.5089 | 0.0024 |
| 225504_at   |             | MRNA; cDNA DKFZp686E0389 (from clone DKFZp686E0389)                                                 | -0.5991 | 0.0226 |
| 225511_at   | GPRC5B      | G protein-coupled receptor; family C; group 5; member B                                             | -0.4554 | 0.0144 |
| 225512_at   | ZBTB38      | zinc finger and BTB domain containing 38                                                            | -0.7073 | 0.0002 |
| 225516_at   | SLC7A2      | solute carrier family 7 (cationic amino acid transporter; y+ system); member 2                      | -1.4749 | 0.0149 |
| 225523_at   | MRPL53      | mitochondrial ribosomal protein L53                                                                 | -0.658  | 0.0001 |
| 225524_at   | ANTXR2      | anthrax toxin receptor 2                                                                            | -1.4118 | 0.007  |
| 225525_at   | CTA-221G9.4 | KIAA1671 protein                                                                                    | -0.7773 | 0.0155 |
| 225534_at   | C8orf40     | chromosome 8 open reading frame 40                                                                  | -0.5087 | 0.0234 |

|             |           |                                                                                                                         |         |        |
|-------------|-----------|-------------------------------------------------------------------------------------------------------------------------|---------|--------|
| 225539_at   | ZNF295    | zinc finger protein 295                                                                                                 | -2.1293 | 0      |
| 225546_at   | EEF2K     | eukaryotic elongation factor-2 kinase                                                                                   | -0.543  | 0.0417 |
| 225550_at   | C1orf71   | chromosome 1 open reading frame 71                                                                                      | -0.5711 | 0.0251 |
| 225557_at   | AXUD1     | AXIN1 up-regulated 1                                                                                                    | -2.3467 | 0      |
| 225564_at   | SPATA13   | spermatogenesis associated 13                                                                                           | -1.0348 | 0.0151 |
| 225566_at   | NRP2      | neuropilin 2                                                                                                            | -1.3332 | 0.0016 |
| 225571_at   | LIFR      | leukemia inhibitory factor receptor alpha                                                                               | -1.7642 | 0.0008 |
| 225574_at   | RWDD4A    | RWD domain containing 4A                                                                                                | -1.1563 | 0.0012 |
| 225575_at   | LIFR      | leukemia inhibitory factor receptor alpha                                                                               | -2.4614 | 0.0002 |
| 225579_at   | PQLC3     | PQ loop repeat containing 3                                                                                             | -1.2894 | 0.0002 |
| 225591_at   | FBXO25    | F-box protein 25                                                                                                        | -1.5751 | 0      |
| 225611_at   |           |                                                                                                                         | -1.0524 | 0.0141 |
| 225615_at   | LOC126917 | hypothetical protein LOC126917                                                                                          | -1.0271 | 0      |
| 225618_at   | ARHGAP27  | Rho GTPase activating protein 27                                                                                        | -0.2942 | 0.0353 |
| 225627_s_at | CACHD1    | cache domain containing 1                                                                                               | -1.8938 | 0.002  |
| 225629_s_at | ZBTB4     | zinc finger and BTB domain containing 4                                                                                 | -0.8849 | 0.0001 |
| 225632_s_at | ISY1      | ISY1 splicing factor homolog ( <i>S. cerevisiae</i> ), RAB43; member RAS oncogene family                                | -0.2735 | 0.047  |
| 225641_at   | MEF2D     | myocyte enhancer factor 2D                                                                                              | -0.2934 | 0.036  |
| 225660_at   | SEMA6A    | sema domain; transmembrane domain (TM); and cytoplasmic domain; (semaphorin) 6A                                         | -3.0882 | 0      |
| 225664_at   | COL12A1   | collagen; type XII; alpha 1                                                                                             | -2.7591 | 0      |
| 225678_at   | POLR3H    | polymerase (RNA) III (DNA directed) polypeptide H (22.9kD)                                                              | -0.7899 | 0      |
| 225685_at   |           | CDNA FLJ31353 fis; clone MESAN2000264                                                                                   | -1.531  | 0.0024 |
| 225688_s_at | PHLDB2    | pleckstrin homology-like domain; family B; member 2                                                                     | -2.0677 | 0.0002 |
| 225692_at   | CAMTA1    | calmodulin binding transcription activator 1                                                                            | -0.3463 | 0.0252 |
| 225699_at   | C7orf40   | chromosome 7 open reading frame 40                                                                                      | -0.6629 | 0.0388 |
| 225714_s_at |           |                                                                                                                         | -0.1324 | 0.0004 |
| 225720_at   | SYNPO2    | synaptopodin 2                                                                                                          | -2.2956 | 0      |
| 225721_at   | SYNPO2    | synaptopodin 2                                                                                                          | -1.5302 | 0.0009 |
| 225728_at   | SORBS2    | sorbin and SH3 domain containing 2                                                                                      | -2.3293 | 0.0013 |
| 225729_at   | C6orf89   | chromosome 6 open reading frame 89                                                                                      | -0.7705 | 0.0018 |
| 225762_x_at | LOC284801 | hypothetical protein LOC284801                                                                                          | -0.4963 | 0.0046 |
| 225763_at   | RCSD1     | RCSD domain containing 1                                                                                                | -0.9834 | 0.009  |
| 225767_at   |           |                                                                                                                         | -2.4714 | 0.0002 |
| 225780_at   | DDI2      | DDI1; DNA-damage inducible 1; homolog 2 ( <i>S. cerevisiae</i> ), regulatory solute carrier protein; family 1; member 1 | -1.3742 | 0      |

|             |               |                                                                             |         |        |
|-------------|---------------|-----------------------------------------------------------------------------|---------|--------|
| 225783_at   | UBE2F         | ubiquitin-conjugating enzyme E2F (putative)                                 | -0.5208 | 0.0063 |
| 225785_at   | REEP3         | receptor accessory protein 3                                                | -0.3686 | 0.0129 |
| 225787_at   | UBE2F         | ubiquitin-conjugating enzyme E2F (putative)                                 | -0.5205 | 0.0037 |
| 225789_at   | CENTG3        | centaurin; gamma 3                                                          | -0.6201 | 0.0158 |
| 225792_at   | HOOK1         | hook homolog 1 (Drosophila)                                                 | -1.1662 | 0.0171 |
| 225794_s_at | C22orf32      | chromosome 22 open reading frame 32                                         | -0.9218 | 0.0001 |
| 225795_at   | C22orf32      | chromosome 22 open reading frame 32                                         | -0.947  | 0.0015 |
| 225796_at   | PXK           | PX domain containing serine/threonine kinase                                | -0.5088 | 0.0175 |
| 225798_at   | JAZF1         | JAZF zinc finger 1                                                          | -1.5228 | 0.0005 |
| 225800_at   | JAZF1         | JAZF zinc finger 1                                                          | -2.0575 | 0      |
| 225804_at   | CYB5D2        | cytochrome b5 domain containing 2                                           | -1.0924 | 0.0001 |
| 225809_at   | DKFZP564O0823 | DKFZP564O0823 protein                                                       | -2.7836 | 0.0003 |
| 225810_at   | MTMR10        | myotubularin related protein 10                                             | -0.8673 | 0.0007 |
| 225811_at   |               | Transcribed locus                                                           | -1.0103 | 0      |
| 225817_at   | CGNL1         | cingulin-like 1                                                             | -2.3147 | 0.0112 |
| 225819_at   | TBRG1         | transforming growth factor beta regulator 1                                 | -0.8516 | 0      |
| 225822_at   | TMEM125       | transmembrane protein 125                                                   | -0.2787 | 0      |
| 225831_at   | LUZP1         | leucine zipper protein 1                                                    | -1.2114 | 0      |
| 225835_at   | SLC12A2       | solute carrier family 12 (sodium/potassium/chloride transporters); member 2 | -0.7299 | 0.0338 |
| 225842_at   | PHLDA1        | pleckstrin homology-like domain; family A; member 1                         | -1.54   | 0.0308 |
| 225844_at   | POLE4         | polymerase (DNA-directed); epsilon 4 (p12 subunit)                          | -0.8985 | 0.0038 |
| 225845_at   | ZBTB44        | zinc finger and BTB domain containing 44                                    | -0.4586 | 0.0047 |
| 225847_at   | AADA1         | arylacetamide deacetylase-like 1                                            | -1.6961 | 0.0001 |
| 225849_s_at | SFT2D1        | SFT2 domain containing 1                                                    | -0.5331 | 0.0376 |
| 225855_at   | EPB41L5       | erythrocyte membrane protein band 4.1 like 5                                | -1.362  | 0.0001 |
| 225867_at   | VASN          | vasorin                                                                     | -1.2374 | 0.0004 |
| 225869_s_at | UNC93B1       | unc-93 homolog B1 (C. elegans)                                              | -0.2853 | 0.0227 |
| 225872_at   | SLC35F5       | solute carrier family 35; member F5                                         | -0.5728 | 0.0022 |
| 225884_s_at | GZF1          | GDNF-inducible zinc finger protein 1                                        | -1.3339 | 0      |
| 225886_at   |               | Full-length cDNA clone CS0DF030YM05 of Fetal brain of Homo sapiens (human)  | -0.6851 | 0.0063 |
| 225893_at   |               | Clone TESTIS-724 mRNA sequence                                              | -0.8134 | 0.0026 |
| 225894_at   | SYNPO2        | synaptopodin 2                                                              | -0.2988 | 0.0075 |
| 225895_at   | SYNPO2        | synaptopodin 2                                                              | -2.1506 | 0.0006 |
| 225901_at   | PTPMT1        | protein tyrosine phosphatase; mitochondrial 1                               | -1.1844 | 0      |
| 225908_at   | IAH1          | isoamyl acetate-hydrolyzing esterase 1 homolog (S. cerevisiae)              | -0.7497 | 0.0025 |

|             |           |                                                                                                                     |         |        |
|-------------|-----------|---------------------------------------------------------------------------------------------------------------------|---------|--------|
| 225910_at   | HELZ      | helicase with zinc finger                                                                                           | -0.5674 | 0.0349 |
| 225914_s_at | CAB39L    | calcium binding protein 39-like                                                                                     | -2.5106 | 0      |
| 225915_at   | CAB39L    | calcium binding protein 39-like                                                                                     | -4.1423 | 0      |
| 225919_s_at | C9orf72   | chromosome 9 open reading frame 72                                                                                  | -1.5176 | 0.0007 |
| 225923_at   |           | CDNA FLJ41394 fis; clone BRCAN2026197                                                                               | -1.2739 | 0.0014 |
| 225925_s_at | USP48     | ubiquitin specific peptidase 48                                                                                     | -1.144  | 0      |
| 225926_at   | VTI1B     | vesicle transport through interaction with t-SNAREs homolog 1B (yeast)                                              | -0.558  | 0.0121 |
| 225939_at   | EIF4E3    | eukaryotic translation initiation factor 4E family member 3                                                         | -0.5195 | 0.0167 |
| 225940_at   | EIF4E3    | eukaryotic translation initiation factor 4E family member 3                                                         | -0.853  | 0.0058 |
| 225941_at   | EIF4E3    | eukaryotic translation initiation factor 4E family member 3                                                         | -1.0868 | 0.0043 |
| 225953_at   | P15RS     | hypothetical protein FLJ10656                                                                                       | -1.0365 | 0      |
| 225954_s_at | MIDN      | midnolin                                                                                                            | -0.78   | 0.0172 |
| 225955_at   | LOC653506 | meteorin; glial cell differentiation regulator-like, similar to meteorin; glial cell differentiation regulator-like | -1.4089 | 0.003  |
| 225966_at   | C17orf89  | chromosome 17 open reading frame 89                                                                                 | -0.1788 | 0.0318 |
| 225975_at   | PCDH18    | protocadherin 18                                                                                                    | -1.511  | 0.02   |
| 225982_at   | UBTF      | upstream binding transcription factor; RNA polymerase I                                                             | -0.4406 | 0.0182 |
| 225987_at   | STEAP4    | STEAP family member 4                                                                                               | -4.0636 | 0      |
| 225990_at   | BOC       | Boc homolog (mouse)                                                                                                 | -1.7804 | 0      |
| 225991_at   | TMEM41A   | transmembrane protein 41A                                                                                           | -0.5973 | 0.0434 |
| 225996_at   | LONRF2    | LON peptidase N-terminal domain and ring finger 2                                                                   | -2.3161 | 0.0004 |
| 226008_at   | NDNL2     | necdin-like 2                                                                                                       | -0.5806 | 0.0039 |
| 226011_at   | CCDC12    | coiled-coil domain containing 12                                                                                    | -0.6134 | 0.0006 |
| 226012_at   | ANKRD11   | ankyrin repeat domain 11                                                                                            | -0.9339 | 0.0001 |
| 226013_at   | TRAK1     | trafficking protein; kinesin binding 1                                                                              | -0.5308 | 0.0176 |
| 226014_at   | EIF3S5    | Eukaryotic translation initiation factor 3; subunit 5 epsilon; 47kDa                                                | -0.1048 | 0.0457 |
| 226018_at   | C7orf41   | chromosome 7 open reading frame 41                                                                                  | -0.5808 | 0.0138 |
| 226019_at   | OMA1      | OMA1 homolog; zinc metallopeptidase (S. cerevisiae)                                                                 | -0.6157 | 0.0152 |
| 226020_s_at | DAB1      | OMA1 homolog; zinc metallopeptidase (S. cerevisiae), disabled homolog 1 (Drosophila)                                | -0.6774 | 0.0442 |
| 226021_at   | RDH10     | retinol dehydrogenase 10 (all-trans)                                                                                | -1.5732 | 0.0013 |
| 226024_at   | COMMD1    | copper metabolism (Murr1) domain containing 1                                                                       | -0.6828 | 0      |
| 226026_at   | DIRC2     | disrupted in renal carcinoma 2                                                                                      | -0.9423 | 0.0005 |
| 226028_at   | ROBO4     | roundabout homolog 4; magic roundabout (Drosophila)                                                                 | -0.6444 | 0.0183 |
| 226030_at   | ACADSB    | acyl-Coenzyme A dehydrogenase; short/branched chain                                                                 | -2.4166 | 0      |
| 226038_at   | LONRF1    | LON peptidase N-terminal domain and ring finger 1                                                                   | -0.6333 | 0.0131 |

|             |           |                                                                                                 |         |        |
|-------------|-----------|-------------------------------------------------------------------------------------------------|---------|--------|
| 226039_at   | MGAT4A    | mannosyl (alpha-1;3-)-glycoprotein beta-1;4-N-acetylglucosaminyltransferase; isozyme A          | -1.0753 | 0.0493 |
| 226047_at   | MRVI1     | murine retrovirus integration site 1 homolog                                                    | -1.2991 | 0.001  |
| 226051_at   | SELM      | selenoprotein M                                                                                 | -1.818  | 0.0019 |
| 226056_at   | CDGAP     | Cdc42 GTPase-activating protein                                                                 | -0.3798 | 0.0054 |
| 226066_at   | MITF      | microphthalmia-associated transcription factor                                                  | -1.2122 | 0.0112 |
| 226068_at   | SYK       | spleen tyrosine kinase                                                                          | -1.1159 | 0.0044 |
| 226073_at   | LOC219854 | hypothetical protein LOC219854                                                                  | -1.0631 | 0.0012 |
| 226074_at   | PPM1M     | protein phosphatase 1M (PP2C domain containing)                                                 | -0.7813 | 0.0006 |
| 226089_at   | LOC653256 | RAB; member of RAS oncogene family-like 3, similar to RAB; member of RAS oncogene family-like 3 | -0.6393 | 0.0439 |
| 226096_at   | FNDC5     | fibronectin type III domain containing 5                                                        | -3.7036 | 0      |
| 226097_at   | FNDC5     | fibronectin type III domain containing 5                                                        | -0.63   | 0      |
| 226099_at   | ELL2      | elongation factor; RNA polymerase II; 2                                                         | -2.4299 | 0.0001 |
| 226103_at   | NEXN      | nexilin (F actin binding protein)                                                               | -3.0119 | 0      |
| 226106_at   | RNF141    | ring finger protein 141                                                                         | -0.8182 | 0      |
| 226112_at   | SGCB      | sarcoglycan; beta (43kDa dystrophin-associated glycoprotein)                                    | -0.5932 | 0.0352 |
| 226119_at   | PCMTD1    | protein-L-isoaspartate (D-aspartate) O-methyltransferase domain containing 1                    | -0.5909 | 0.0013 |
| 226134_s_at |           | Transcribed locus                                                                               | -0.9653 | 0.0004 |
| 226135_at   | C6orf107  | chromosome 6 open reading frame 107                                                             | -0.8798 | 0.0083 |
| 226139_at   |           | Full length insert cDNA clone ZA04F06                                                           | -0.2308 | 0.0457 |
| 226148_at   | ZBTB44    | zinc finger and BTB domain containing 44                                                        | -0.2761 | 0.0409 |
| 226162_at   | SLC30A6   | solute carrier family 30 (zinc transporter); member 6                                           | -0.1475 | 0.0042 |
| 226169_at   | SBF2      | SET binding factor 2                                                                            | -0.4846 | 0.0174 |
| 226179_at   | SLC25A37  | solute carrier family 25; member 37                                                             | -0.5922 | 0.0453 |
| 226184_at   | FMNL2     | formin-like 2                                                                                   | -1.2011 | 0.0012 |
| 226188_at   | HSPC159   | galectin-related protein                                                                        | -0.6047 | 0.0421 |
| 226190_at   |           | Homo sapiens; clone IMAGE:4294444; mRNA                                                         | -0.7405 | 0.0036 |
| 226206_at   | MAFK      | v-maf musculoaponeurotic fibrosarcoma oncogene homolog K (avian)                                | -0.7895 | 0.0368 |
| 226213_at   | ERBB3     | v-erb-b2 erythroblastic leukemia viral oncogene homolog 3 (avian)                               | -0.3596 | 0.0006 |
| 226214_at   | MIR16     | membrane interacting protein of RGS16                                                           | -0.5568 | 0.0129 |
| 226219_at   | ARHGAP30  | Rho GTPase activating protein 30                                                                | -1.0066 | 0.0179 |
| 226220_at   | METTL9    | Methyltransferase like 9                                                                        | -0.4788 | 0.0043 |
| 226223_at   |           | Transcribed locus                                                                               | -1.7877 | 0.0012 |

|             |               |                                                                            |         |        |
|-------------|---------------|----------------------------------------------------------------------------|---------|--------|
| 226224_at   | FO XK2        | forkhead box K2                                                            | -1.7413 | 0      |
| 226229_s_at | SSU72         | SSU72 RNA polymerase II CTD phosphatase homolog ( <i>S. cerevisiae</i> )   | -1.2696 | 0      |
| 226230_at   | SMEK2         | SMEK homolog 2; suppressor of mek1 ( <i>Dictyostelium</i> )                | -0.7843 | 0.0001 |
| 226231_at   |               | Transcribed locus                                                          | -1.1283 | 0.0005 |
| 226236_at   | LOC388789     | hypothetical gene supported by AF147354                                    | -0.3196 | 0.0406 |
| 226237_at   |               | MRNA full length insert cDNA clone EUROIMAGE 1913076                       | -2.4037 | 0.0002 |
| 226238_at   | MCEE          | methylmalonyl CoA epimerase                                                | -1.6046 | 0.0001 |
| 226239_at   | TMEM150       | transmembrane protein 150                                                  | -0.3274 | 0.0401 |
| 226243_at   | LOC391356     | similar to CG14903-PA                                                      | -0.9362 | 0      |
| 226245_at   | KCTD1         | potassium channel tetramerisation domain containing 1                      | -1.2401 | 0.0047 |
| 226246_at   | KCTD1         | potassium channel tetramerisation domain containing 1                      | -0.8843 | 0.0114 |
| 226250_at   |               | CDNA FLJ34585 fis; clone KIDNE2008758                                      | -0.6966 | 0.0304 |
| 226257_x_at | MRPS22        | mitochondrial ribosomal protein S22                                        | -0.5317 | 0.0004 |
| 226264_at   | SUSD1         | sushi domain containing 1                                                  | -0.7247 | 0.0098 |
| 226278_at   | DKFZp313A2432 | hypothetical protein DKFZp313A2432                                         | -0.9953 | 0.0394 |
| 226280_at   |               | CDNA FLJ43545 fis; clone PROST2011631                                      | -1.1046 | 0.001  |
| 226281_at   | DNER          | delta/notch-like EGF repeat containing                                     | -2.2868 | 0.0111 |
| 226282_at   |               | Full length insert cDNA clone ZE03F06                                      | -0.9912 | 0.0019 |
| 226296_s_at | MRPS15        | mitochondrial ribosomal protein S15                                        | -0.3183 | 0.0268 |
| 226297_at   | HIPK3         | Homeodomain interacting protein kinase 3                                   | -0.6897 | 0.0001 |
| 226300_at   | MED19         | mediator complex subunit 19                                                | -0.9894 | 0.0079 |
| 226302_at   | ATP8B1        | ATPase; Class I; type 8B; member 1                                         | -1.3938 | 0.001  |
| 226303_at   | PGM5          | phosphoglucomutase 5                                                       | -1.843  | 0.004  |
| 226321_at   | LYSMD3        | LysM; putative peptidoglycan-binding; domain containing 3                  | -0.6283 | 0.0062 |
| 226326_at   | PCGF5         | polycomb group ring finger 5                                               | -0.7919 | 0.0062 |
| 226342_at   | SPTBN1        | spectrin; beta; non-erythrocytic 1                                         | -2.0546 | 0      |
| 226345_at   | ARL5B         | ADP-ribosylation factor-like 5B                                            | -1.234  | 0.0081 |
| 226357_at   | USP19         | ubiquitin specific peptidase 19                                            | -0.3555 | 0.0043 |
| 226360_at   | ZNRF3         | zinc and ring finger 3                                                     | -1.7731 | 0.0172 |
| 226370_at   | KLHL15        | kelch-like 15 ( <i>Drosophila</i> )                                        | -1.088  | 0.0018 |
| 226374_at   |               | Full-length cDNA clone CS0DF012YG01 of Fetal brain of Homo sapiens (human) | -0.986  | 0.032  |
| 226380_at   | PTPN21        | protein tyrosine phosphatase; non-receptor type 21                         | -0.9674 | 0.0061 |
| 226381_at   | PS1TP4        | HBV preS1-transactivated protein 4                                         | -0.7846 | 0.0004 |
| 226392_at   |               | CDNA: FLJ21652 fis; clone COL08582                                         | -0.3861 | 0.0257 |
| 226395_at   | LOC286170     | hypothetical protein LOC286170                                             | -0.5439 | 0.0395 |



|             |           |                                                                            |         |        |
|-------------|-----------|----------------------------------------------------------------------------|---------|--------|
| 226396_at   | CDK3      | cyclin-dependent kinase 3                                                  | -0.4418 | 0.0251 |
| 226415_at   | KIAA1576  | KIAA1576 protein                                                           | -2.6057 | 0.0034 |
| 226417_at   | RHOB      | Ras homolog gene family; member B                                          | -0.1483 | 0.0023 |
| 226431_at   | ALS2CR13  | amyotrophic lateral sclerosis 2 (juvenile) chromosome region; candidate 13 | -1.4182 | 0.0003 |
| 226434_at   | C7orf47   | chromosome 7 open reading frame 47                                         | -1.2293 | 0.0141 |
| 226435_at   | PAPLN     | papilin; proteoglycan-like sulfated glycoprotein                           | -1.6382 | 0      |
| 226436_at   | RASSF4    | Ras association (RalGDS/AF-6) domain family 4                              | -1.437  | 0.0158 |
| 226438_at   |           | CDNA: FLJ21447 fis; clone COL04468                                         | -1.7096 | 0.0028 |
| 226439_s_at | NBEA      | neurobeachin                                                               | -1.4242 | 0.0065 |
| 226442_at   | ABTB1     | ankyrin repeat and BTB (POZ) domain containing 1                           | -0.1599 | 0.0128 |
| 226448_at   | FAM89A    | family with sequence similarity 89; member A                               | -1.8323 | 0.0004 |
| 226452_at   | PDK1      | pyruvate dehydrogenase kinase; isozyme 1                                   | -1.2181 | 0.0042 |
| 226453_at   | RNASEH2C  | ribonuclease H2; subunit C                                                 | -0.5045 | 0.0132 |
| 226479_at   | KBTBD6    | kelch repeat and BTB (POZ) domain containing 6                             | -1.4248 | 0      |
| 226482_s_at | F11R      | F11 receptor                                                               | -2.702  | 0      |
| 226484_at   | ZBTB47    | zinc finger and BTB domain containing 47                                   | -0.7078 | 0.0015 |
| 226500_at   | ZBTB47    | zinc finger and BTB domain containing 47                                   | -0.2225 | 0.0186 |
| 226522_at   | PODN      | podocan                                                                    | -0.5122 | 0.0003 |
| 226523_at   | TAGLN     | Transgelin                                                                 | -0.9675 | 0      |
| 226535_at   | ITGB6     | integrin; beta 6                                                           | -0.1008 | 0.0167 |
| 226550_at   |           | Homo sapiens; Similar to LOC169932; clone IMAGE:4499203; mRNA              | -1.0503 | 0.0092 |
| 226553_at   | TMPRSS2   | transmembrane protease; serine 2                                           | -0.2016 | 0.0021 |
| 226556_at   |           | Homo sapiens; clone IMAGE:4294444; mRNA                                    | -1.1657 | 0.0007 |
| 226561_at   | LOC285086 | hypothetical protein LOC285086                                             | -0.7158 | 0.0384 |
| 226568_at   | FAM102B   | family with sequence similarity 102; member B                              | -0.9509 | 0.0403 |
| 226570_at   | ATP1B3    | ATPase; Na <sup>+</sup> /K <sup>+</sup> transporting; beta 3 polypeptide   | -0.9074 | 0      |
| 226578_s_at | DUSP1     | Dual specificity phosphatase 1                                             | -0.4232 | 0.0007 |
| 226591_at   |           | CDNA FLJ33569 fis; clone BRAMY2010317                                      | -1.2607 | 0.0392 |
| 226595_at   | SNX21     | sorting nexin family member 21                                             | -0.7004 | 0      |
| 226610_at   | PRR6      | proline rich 6                                                             | -1.0936 | 0.0253 |
| 226611_s_at | PRR6      | proline rich 6                                                             | -1.6123 | 0.0057 |
| 226616_s_at | NDUFV3    | NADH dehydrogenase (ubiquinone) flavoprotein 3; 10kDa                      | -0.6198 | 0.0191 |
| 226617_at   | ARL5A     | ADP-ribosylation factor-like 5A                                            | -0.5631 | 0.0002 |
| 226620_x_at | DAZAP1    | DAZ associated protein 1                                                   | -0.5755 | 0      |

|             |           |                                                                      |         |        |
|-------------|-----------|----------------------------------------------------------------------|---------|--------|
| 226632_at   | CYGB      | cytoglobin                                                           | -0.8962 | 0.0101 |
| 226633_at   | RAB8B     | RAB8B; member RAS oncogene family                                    | -0.5759 | 0.0041 |
| 226636_at   | PLD1      | phospholipase D1; phosphatidylcholine-specific                       | -2.1588 | 0      |
| 226645_at   | KLF2      | Kruppel-like factor 2 (lung)                                         | -0.1363 | 0.0212 |
| 226646_at   | KLF2      | Kruppel-like factor 2 (lung)                                         | -0.1778 | 0.0094 |
| 226647_at   | TMEM25    | transmembrane protein 25                                             | -0.9445 | 0.0049 |
| 226652_at   | USP3      | ubiquitin specific peptidase 3                                       | -0.654  | 0.0072 |
| 226657_at   | MGC33894  | transcript expressed during hematopoiesis 2                          | -0.3347 | 0.047  |
| 226660_at   | RPS6KB1   | ribosomal protein S6 kinase; 70kDa; polypeptide 1                    | -0.7192 | 0.0141 |
| 226665_at   | AHSA2     | AHA1; activator of heat shock 90kDa protein ATPase homolog 2 (yeast) | -1.4249 | 0.0157 |
| 226680_at   | IKZF5     | IKAROS family zinc finger 5 (Pegasus)                                | -0.5145 | 0.0306 |
| 226682_at   | LOC283666 | hypothetical protein LOC283666                                       | -1.0341 | 0.0308 |
| 226684_at   | ATG2B     | ATG2 autophagy related 2 homolog B (S. cerevisiae)                   | -0.8366 | 0.0001 |
| 226688_at   | C3orf23   | chromosome 3 open reading frame 23                                   | -0.661  | 0.0089 |
| 226694_at   | AKAP2     | A kinase (PRKA) anchor protein 2, PALM2-AKAP2 protein                | -0.8784 | 0.0321 |
| 226707_at   | NAPRT1    | nicotinate phosphoribosyltransferase domain containing 1             | -1.7905 | 0.0007 |
| 226713_at   | CCDC50    | coiled-coil domain containing 50                                     | -1.8235 | 0.0006 |
| 226718_at   | AMIGO1    | adhesion molecule with Ig-like domain 1                              | -1.513  | 0.0003 |
| 226719_at   |           | CDNA FLJ34899 fis; clone NT2NE2018594                                | -1.0557 | 0      |
| 226722_at   | FAM20C    | family with sequence similarity 20; member C                         | -1.171  | 0.0037 |
| 226727_at   | CISD3     | CDGSH iron sulfur domain 3                                           | -1.4653 | 0      |
| 226729_at   | USP37     | ubiquitin specific peptidase 37                                      | -0.5601 | 0.0115 |
| 226730_s_at | USP37     | ubiquitin specific peptidase 37                                      | -1.0926 | 0.0047 |
| 226731_at   | PELO      | Pelota homolog (Drosophila)                                          | -1.2112 | 0.0184 |
| 226735_at   | TAPT1     | transmembrane anterior posterior transformation 1                    | -1.0242 | 0.0001 |
| 226738_at   | WDR81     | WD repeat domain 81                                                  | -0.8588 | 0.002  |
| 226746_s_at | UBE4B     | Ubiquitination factor E4B (UFD2 homolog; yeast)                      | -0.2882 | 0.0021 |
| 226750_at   | LARP2     | La ribonucleoprotein domain family; member 2                         | -1.0458 | 0.0015 |
| 226751_at   | C2orf32   | chromosome 2 open reading frame 32                                   | -1.2692 | 0.0112 |
| 226765_at   | SPTBN1    | Spectrin; beta; non-erythrocytic 1                                   | -0.9311 | 0      |
| 226769_at   | FIBIN     | fin bud initiation factor                                            | -1.3626 | 0.0017 |
| 226774_at   | FAM120B   | family with sequence similarity 120B                                 | -0.512  | 0.0308 |
| 226780_s_at | C7orf55   | chromosome 7 open reading frame 55                                   | -0.5849 | 0.0047 |
| 226781_at   | C7orf55   | chromosome 7 open reading frame 55                                   | -0.4424 | 0.0382 |

|             |           |                                                                            |         |        |
|-------------|-----------|----------------------------------------------------------------------------|---------|--------|
| 226789_at   | LOC647121 | similar to embigin homolog                                                 | -3.392  | 0.0004 |
| 226790_at   | MORN2     | MORN repeat containing 2                                                   | -0.5524 | 0.0116 |
| 226798_at   | BCL2L13   | BCL2-like 13 (apoptosis facilitator)                                       | -0.3192 | 0.0047 |
| 226806_s_at |           |                                                                            | -1.229  | 0      |
| 226810_at   |           | MRNA full length insert cDNA clone EUROIIMAGE 1509279                      | -2.9208 | 0      |
| 226813_at   | C1orf57   | chromosome 1 open reading frame 57                                         | -0.6913 | 0.011  |
| 226817_at   | DSC2      | desmocollin 2                                                              | -1.0988 | 0.0003 |
| 226818_at   | MPEG1     | macrophage expressed gene 1                                                | -2.6123 | 0      |
| 226821_at   |           | Full-length cDNA clone CS0DF029YD16 of Fetal brain of Homo sapiens (human) | -0.5577 | 0.0436 |
| 226833_at   | CYB5D1    | cytochrome b5 domain containing 1                                          | -0.9748 | 0.0054 |
| 226834_at   |           | Transcribed locus                                                          | -3.0664 | 0.0003 |
| 226836_at   | SFT2D1    | SFT2 domain containing 1                                                   | -0.1994 | 0.0074 |
| 226841_at   | MPEG1     | macrophage expressed gene 1                                                | -2.4675 | 0      |
| 226846_at   | PHYHD1    | phytanoyl-CoA dioxygenase domain containing 1                              | -2.2172 | 0      |
| 226850_at   | SUMF1     | sulfatase modifying factor 1                                               | -0.5456 | 0.0115 |
| 226852_at   | MTA3      | metastasis associated 1 family; member 3                                   | -0.5754 | 0.0007 |
| 226865_at   |           | MRNA; cDNA DKFZp564O0862 (from clone DKFZp564O0862)                        | -1.0653 | 0.0176 |
| 226867_at   | DENND4C   | DENN/MADD domain containing 4C                                             | -0.327  | 0.0349 |
| 226878_at   | HLA-DOA   | major histocompatibility complex; class II; DO alpha                       | -1.6692 | 0.0025 |
| 226879_at   | HVCN1     | hydrogen voltage-gated channel 1                                           | -0.8697 | 0.0006 |
| 226885_at   |           | Transcribed locus                                                          | -1.2875 | 0.0123 |
| 226900_at   | GABPB2    | GA binding protein transcription factor; beta subunit 2                    | -0.1118 | 0.0251 |
| 226902_at   |           | CDNA FLJ34165 fis; clone FCBBF3014770                                      | -2.0687 | 0      |
| 226911_at   | EGFLAM    | EGF-like; fibronectin type III and laminin G domains                       | -1.108  | 0      |
| 226920_at   | CSNK1A1   | Casein kinase 1; alpha 1                                                   | -0.1731 | 0.0076 |
| 226922_at   | RANBP2    | RAN binding protein 2                                                      | -2.2631 | 0      |
| 226932_at   |           | Transcribed locus                                                          | -1.968  | 0.0003 |
| 226940_at   | FAM69B    | Family with sequence similarity 69; member B                               | -0.1674 | 0.0094 |
| 226950_at   | ACVRL1    | activin A receptor type II-like 1                                          | -0.9    | 0.0004 |
| 226956_at   | MTMR3     | myotubularin related protein 3                                             | -0.5794 | 0.0038 |
| 226958_s_at | MED11     | mediator complex subunit 11                                                | -1.2584 | 0      |
| 226974_at   |           | Full-length cDNA clone CS0DF038YD07 of Fetal brain of Homo sapiens (human) | -1.2814 | 0.0002 |
| 226982_at   | ELL2      | elongation factor; RNA polymerase II; 2                                    | -3.0276 | 0      |
| 226993_at   |           | CDNA FLJ46626 fis; clone TRACH2001612                                      | -0.5932 | 0.0022 |
| 227002_at   | FAM78A    | family with sequence similarity 78; member A                               | -0.5753 | 0.0012 |

|             |           |                                                                               |         |        |
|-------------|-----------|-------------------------------------------------------------------------------|---------|--------|
| 227009_at   |           | MRNA; cDNA DKFZp667E0114 (from clone DKFZp667E0114)                           | -0.7722 | 0.0003 |
| 227011_at   | ZNF672    | Zinc finger protein 672                                                       | -0.1567 | 0.0496 |
| 227013_at   | LATS2     | LATS; large tumor suppressor; homolog 2 (Drosophila)                          | -1.3065 | 0.001  |
| 227020_at   | YPEL2     | yippee-like 2 (Drosophila)                                                    | -1.0676 | 0.0039 |
| 227024_s_at | MRPL55    | Mitochondrial ribosomal protein L55                                           | -0.1661 | 0.0148 |
| 227026_at   | HSMPP8    | M-phase phosphoprotein; mpp8                                                  | -0.4221 | 0.0376 |
| 227029_at   | C14orf24  | chromosome 14 open reading frame 24                                           | -0.8662 | 0.0022 |
| 227043_at   | LOC126075 | hypothetical protein LOC126075                                                | -1.3136 | 0      |
| 227047_x_at | ZBTB4     | zinc finger and BTB domain containing 4                                       | -0.689  | 0.0043 |
| 227050_at   | ODZ3      | Odz; odd Oz/ten-m homolog 3 (Drosophila)                                      | -0.1575 | 0.0023 |
| 227052_at   |           | Full-length cDNA clone CS0DE011YO20 of Placenta of Homo sapiens (human)       | -0.7542 | 0.0014 |
| 227054_at   | N6AMT2    | N-6 adenine-specific DNA methyltransferase 2 (putative)                       | -0.6352 | 0.0107 |
| 227056_at   | KIAA0141  | KIAA0141                                                                      | -0.7347 | 0.0318 |
| 227058_at   | C13orf33  | chromosome 13 open reading frame 33                                           | -0.3198 | 0.0209 |
| 227060_at   | RELT      | RELT tumor necrosis factor receptor                                           | -0.3309 | 0.0089 |
| 227063_at   | C17orf61  | chromosome 17 open reading frame 61                                           | -0.8846 | 0.0007 |
| 227064_at   | ANKRD40   | ankyrin repeat domain 40                                                      | -0.7305 | 0.0003 |
| 227066_at   | MOBK12C   | MOB1; Mps One Binder kinase activator-like 2C (yeast)                         | -0.6313 | 0.0001 |
| 227070_at   | GLT8D2    | glycosyltransferase 8 domain containing 2                                     | -2.1731 | 0.0034 |
| 227073_at   | MAP3K2    | mitogen-activated protein kinase kinase kinase 2                              | -0.3652 | 0.0071 |
| 227080_at   | ZNF697    | zinc finger protein 697                                                       | -1.1461 | 0.0065 |
| 227081_at   | DNALI1    | dynein; axonemal; light intermediate chain 1                                  | -1.9012 | 0      |
| 227086_at   | LOC128977 | hypothetical protein LOC128977                                                | -0.2948 | 0.0295 |
| 227088_at   | PDE5A     | phosphodiesterase 5A; cGMP-specific                                           | -1.5898 | 0.01   |
| 227093_at   | USP36     | Ubiquitin specific peptidase 36                                               | -1.3315 | 0.0009 |
| 227095_at   | LEPROT    | leptin receptor overlapping transcript                                        | -0.6568 | 0.0059 |
| 227099_s_at | LOC387763 | hypothetical LOC387763                                                        | -2.2974 | 0      |
| 227110_at   | HNRNPC    | heterogeneous nuclear ribonucleoprotein C (C1/C2)                             | -0.3837 | 0.033  |
| 227126_at   |           | Transcribed locus                                                             | -1.6201 | 0.0007 |
| 227128_s_at | TACSTD2   | Tumor-associated calcium signal transducer 2                                  | -0.1109 | 0.0288 |
| 227131_at   | MAP3K3    | mitogen-activated protein kinase kinase kinase 3                              | -0.3844 | 0.0267 |
| 227138_at   | CRTAP     | cartilage associated protein                                                  | -0.3931 | 0.026  |
| 227142_at   | PLEKHG5   | pleckstrin homology domain containing; family G (with RhoGef domain) member 5 | -0.4826 | 0.0001 |
| 227144_at   | C22orf9   | chromosome 22 open reading frame 9                                            | -0.7379 | 0      |

|             |           |                                                                                                                                                                            |         |        |
|-------------|-----------|----------------------------------------------------------------------------------------------------------------------------------------------------------------------------|---------|--------|
| 227145_at   | LOXL4     | lysyl oxidase-like 4                                                                                                                                                       | -0.462  | 0.0008 |
| 227150_at   | MTF1      | metal-regulatory transcription factor 1                                                                                                                                    | -1.1159 | 0      |
| 227151_at   | SH3PX3    | SH3 and PX domain containing 3                                                                                                                                             | -0.8995 | 0      |
| 227154_at   | IGSF21    | immunoglobulin superfamily; member 21                                                                                                                                      | -0.6392 | 0.0127 |
| 227158_at   | C14orf126 | chromosome 14 open reading frame 126                                                                                                                                       | -0.6877 | 0.0045 |
| 227159_at   | GHDC      | GH3 domain containing                                                                                                                                                      | -0.9741 | 0.0085 |
| 227167_s_at |           | Mesenchymal stem cell protein DSC96                                                                                                                                        | -0.6536 | 0.0449 |
| 227173_s_at | BACH2     | BTB and CNC homology 1; basic leucine zipper transcription factor 2                                                                                                        | -0.1897 | 0.0465 |
| 227175_at   | MCL1      | Myeloid cell leukemia sequence 1 (BCL2-related)                                                                                                                            | -0.1253 | 0.0089 |
| 227184_at   |           |                                                                                                                                                                            | -0.8385 | 0.0048 |
| 227190_at   | TMEM37    | transmembrane protein 37                                                                                                                                                   | -1.0822 | 0.0016 |
| 227195_at   | ZNF503    | zinc finger protein 503                                                                                                                                                    | -1.5624 | 0.0056 |
| 227197_at   | SGEF      | Src homology 3 domain-containing guanine nucleotide exchange factor                                                                                                        | -0.8278 | 0.0179 |
| 227200_at   |           |                                                                                                                                                                            | -0.6373 | 0.0193 |
| 227202_at   | CNTN1     | Contactin 1                                                                                                                                                                | -0.9093 | 0.0109 |
| 227209_at   | CNTN1     | Contactin 1                                                                                                                                                                | -1.5128 | 0.0003 |
| 227226_at   | C6orf117  | chromosome 6 open reading frame 117                                                                                                                                        | -1.1208 | 0      |
| 227235_at   |           | CDNA clone IMAGE:5302158                                                                                                                                                   | -1.5772 | 0.0043 |
| 227240_at   | NGEF      | neuronal guanine nucleotide exchange factor                                                                                                                                | -2.3775 | 0.0068 |
| 227250_at   | KREMEN1   | kringle containing transmembrane protein 1                                                                                                                                 | -1.309  | 0      |
| 227265_at   | FGL2      | fibrinogen-like 2                                                                                                                                                          | -2.4521 | 0.0001 |
| 227268_at   | LOC51136  | PTD016 protein                                                                                                                                                             | -0.8759 | 0.0157 |
| 227271_at   | FGF11     | fibroblast growth factor 11                                                                                                                                                | -2.2531 | 0.0021 |
| 227274_at   |           | Transcribed locus; strongly similar to XP_524440.1 similar to Phospholipid hydroperoxide glutathione peroxidase; mitochondrial precursor (PHGPx) (GPX-4) [Pan troglodytes] | -0.4192 | 0.0068 |
| 227278_at   |           |                                                                                                                                                                            | -0.5445 | 0.0103 |
| 227298_at   | FLJ37798  | hypothetical gene supported by AK095117                                                                                                                                    | -0.3941 | 0.0387 |
| 227302_s_at | FLII      | flightless I homolog (Drosophila), lethal giant larvae homolog 1 (Drosophila)                                                                                              | -0.1777 | 0.0022 |
| 227314_at   | ITGA2     | integrin; alpha 2 (CD49B; alpha 2 subunit of VLA-2 receptor)                                                                                                               | -1.8495 | 0.0081 |
| 227317_at   | LMCD1     | LIM and cysteine-rich domains 1                                                                                                                                            | -0.124  | 0.0254 |
| 227328_at   | CAMTA1    | Calmodulin binding transcription activator 1                                                                                                                               | -0.8055 | 0.0091 |
| 227338_at   | LOC440983 | hypothetical gene supported by BC066916                                                                                                                                    | -0.292  | 0.028  |
| 227344_at   | IKZF1     | IKAROS family zinc finger 1 (Ikaros)                                                                                                                                       | -0.3103 | 0.0264 |

|             |           |                                                                                               |         |        |
|-------------|-----------|-----------------------------------------------------------------------------------------------|---------|--------|
| 227345_at   | TNFRSF10D | tumor necrosis factor receptor superfamily; member 10d; decoy with truncated death domain     | -0.4531 | 0.0006 |
| 227351_at   | C16orf52  | chromosome 16 open reading frame 52                                                           | -0.7    | 0.0025 |
| 227353_at   | TMC8      | transmembrane channel-like 8                                                                  | -0.5846 | 0.0102 |
| 227356_at   |           | CDNA: FLJ22198 fis; clone HRC01218                                                            | -0.8899 | 0.0038 |
| 227366_at   | RILP      | Rab interacting lysosomal protein                                                             | -1.2387 | 0      |
| 227368_at   |           | Transcribed locus; moderately similar to XP_001091208.1 hypothetical protein [Macaca mulatta] | -1.3831 | 0.016  |
| 227370_at   | KIAA1946  | KIAA1946                                                                                      | -2.2033 | 0.0006 |
| 227375_at   | ANKRD13C  | ankyrin repeat domain 13C                                                                     | -0.778  | 0.0008 |
| 227379_at   | MBOAT1    | membrane bound O-acyltransferase domain containing 1                                          | -0.5531 | 0.042  |
| 227380_x_at | C16orf13  | Chromosome 16 open reading frame 13                                                           | -0.1283 | 0.0174 |
| 227381_at   | CEECAM1   | Cerebral endothelial cell adhesion molecule 1                                                 | -0.1476 | 0.0023 |
| 227386_s_at | TTMB      | TTMB protein                                                                                  | -0.9891 | 0.01   |
| 227397_at   | TPM2      | tropomyosin 2 (beta)                                                                          | -0.2705 | 0.0097 |
| 227399_at   | VGLL3     | vestigial like 3 (Drosophila)                                                                 | -1.7128 | 0      |
| 227404_s_at | EGR1      | Early growth response 1                                                                       | -2.2171 | 0.0006 |
| 227407_at   | TAPT1     | transmembrane anterior posterior transformation 1                                             | -0.8248 | 0.0098 |
| 227419_x_at | PLAC9     | placenta-specific 9                                                                           | -0.9134 | 0.0001 |
| 227433_at   | KIAA2018  | KIAA2018                                                                                      | -0.6805 | 0.0097 |
| 227436_at   | OTUD7B    | OTU domain containing 7B                                                                      | -1.1157 | 0.0002 |
| 227443_at   | C9orf150  | chromosome 9 open reading frame 150                                                           | -2.213  | 0.0001 |
| 227444_at   | ARMCX4    | Armadillo repeat containing; X-linked 4                                                       | -1.5666 | 0.0072 |
| 227466_at   | LOC285550 | hypothetical protein LOC285550                                                                | -0.785  | 0.0006 |
| 227470_at   | ZNF553    | zinc finger protein 553                                                                       | -0.7225 | 0.0002 |
| 227474_at   | LOC654433 | Hypothetical LOC654433                                                                        | -1.4751 | 0.019  |
| 227478_at   | LOC284262 | hypothetical protein LOC284262                                                                | -1.9017 | 0      |
| 227480_at   | SUSD2     | sushi domain containing 2                                                                     | -1.9781 | 0      |
| 227486_at   | NT5E      | 5'-nucleotidase; ecto (CD73)                                                                  | -0.298  | 0.002  |
| 227491_at   |           | CDNA: FLJ22539 fis; clone HRC13227                                                            | -1.5473 | 0.0006 |
| 227502_at   | KIAA1147  | KIAA1147                                                                                      | -0.2685 | 0.0062 |
| 227506_at   | SLC16A9   | solute carrier family 16; member 9 (monocarboxylic acid transporter 9)                        | -3.8929 | 0      |
| 227516_at   | SF3A1     | splicing factor 3a; subunit 1; 120kDa                                                         | -0.5905 | 0.0081 |
| 227529_s_at | AKAP12    | A kinase (PRKA) anchor protein (gravin) 12                                                    | -1.0621 | 0.0056 |
| 227530_at   | AKAP12    | A kinase (PRKA) anchor protein (gravin) 12                                                    | -2.3014 | 0      |
| 227542_at   | SOCS6     | suppressor of cytokine signaling 6                                                            | -0.7093 | 0.0032 |

|             |           |                                                                                                       |         |        |
|-------------|-----------|-------------------------------------------------------------------------------------------------------|---------|--------|
| 227546_x_at | AURKAIP1  | aurora kinase A interacting protein 1, similar to Cyclin-L2 (Paneth cell-enhanced expression protein) | -0.2316 | 0.0323 |
| 227550_at   | LOC143381 | hypothetical protein LOC143381                                                                        | -0.668  | 0      |
| 227557_at   | SCARF2    | scavenger receptor class F; member 2                                                                  | -0.3275 | 0.0005 |
| 227561_at   | DDR2      | Discoidin domain receptor family; member 2                                                            | -1.3974 | 0.0232 |
| 227582_at   | KLHDC9    | kelch domain containing 9                                                                             | -0.9767 | 0.0154 |
| 227588_s_at | C7orf20   | Chromosome 7 open reading frame 20                                                                    | -0.2261 | 0.0002 |
| 227591_at   | SH3BP5    | SH3-domain binding protein 5 (BTK-associated)                                                         | -0.431  | 0.001  |
| 227598_at   | C7orf29   | chromosome 7 open reading frame 29                                                                    | -1.8712 | 0.0055 |
| 227599_at   | C3orf59   | chromosome 3 open reading frame 59                                                                    | -1.168  | 0.0321 |
| 227613_at   | ZNF331    | zinc finger protein 331                                                                               | -4.4878 | 0      |
| 227616_at   | BCL9L     | B-cell CLL/lymphoma 9-like                                                                            | -0.7239 | 0.0088 |
| 227620_at   | SLC44A1   | solute carrier family 44; member 1                                                                    | -1.1275 | 0.0024 |
| 227629_at   | PRLR      | Prolactin receptor                                                                                    | -2.585  | 0.01   |
| 227630_at   |           | CDNA FLJ34250 fis; clone FCBBF4000529                                                                 | -1.2548 | 0.0001 |
| 227635_at   | LOC730111 | hypothetical protein LOC730111                                                                        | -0.1848 | 0.0134 |
| 227645_at   | PIK3R5    | phosphoinositide-3-kinase; regulatory subunit 5; p101                                                 | -0.7208 | 0.0004 |
| 227654_at   | C20orf175 | chromosome 20 open reading frame 175                                                                  | -3.5156 | 0      |
| 227656_at   | C6orf70   | chromosome 6 open reading frame 70                                                                    | -0.4431 | 0.0376 |
| 227657_at   | RNF150    | ring finger protein 150                                                                               | -1.5323 | 0.0151 |
| 227660_at   | ANTXR1    | anthrax toxin receptor 1                                                                              | -0.8181 | 0.0003 |
| 227662_at   | SYNPO2    | synaptopodin 2                                                                                        | -1.3167 | 0.0248 |
| 227667_at   | CUEDC1    | CUE domain containing 1                                                                               | -0.6548 | 0.0006 |
| 227669_at   | BRP44     | brain protein 44                                                                                      | -1.089  | 0.0006 |
| 227676_at   | FAM3D     | family with sequence similarity 3; member D                                                           | -0.1762 | 0.0448 |
| 227681_at   | ZFP36L2   | Zinc finger protein 36; C3H type-like 2                                                               | -0.1669 | 0.0016 |
| 227693_at   | WDR20     | WD repeat domain 20                                                                                   | -0.8736 | 0.0002 |
| 227697_at   | SOCS3     | suppressor of cytokine signaling 3                                                                    | -2.3451 | 0.0005 |
| 227702_at   | CYP4X1    | cytochrome P450; family 4; subfamily X; polypeptide 1                                                 | -1.5428 | 0      |
| 227703_s_at | SYTL4     | synaptotagmin-like 4 (granuphilin-a)                                                                  | -0.7881 | 0      |
| 227704_at   | C19orf12  | chromosome 19 open reading frame 12                                                                   | -0.6453 | 0      |
| 227705_at   | TCEAL7    | transcription elongation factor A (SII)-like 7                                                        | -1.357  | 0.0023 |
| 227708_at   | EEF1A1    | eukaryotic translation elongation factor 1 alpha 1                                                    | -1.5046 | 0      |
| 227710_s_at | LOC728913 | Pp13759, Similar to Reticulocalbin-1 precursor                                                        | -0.3386 | 0.0164 |
| 227727_at   | MRGPRF    | MAS-related GPR; member F                                                                             | -0.5169 | 0.0007 |
| 227730_at   |           | CDNA clone IMAGE:40018609                                                                             | -0.7338 | 0.0001 |

|             |           |                                                                               |         |        |
|-------------|-----------|-------------------------------------------------------------------------------|---------|--------|
| 227731_at   |           | CDNA FLJ11631 fis; clone HEMBA1004267                                         | -0.938  | 0.0002 |
| 227735_s_at | C10orf99  | chromosome 10 open reading frame 99                                           | -0.1848 | 0.0305 |
| 227748_at   | CCBL2     | cysteine conjugate-beta lyase 2                                               | -0.9564 | 0.0128 |
| 227749_at   |           | Transcribed locus                                                             | -0.3082 | 0.02   |
| 227755_at   |           | CDNA clone IMAGE:4077090                                                      | -1.895  | 0.0008 |
| 227758_at   | RERG      | RAS-like; estrogen-regulated; growth inhibitor                                | -2.122  | 0.0038 |
| 227761_at   | MYO5A     | myosin VA (heavy chain 12; myoxin)                                            | -0.6091 | 0.0324 |
| 227771_at   | LIFR      | leukemia inhibitory factor receptor alpha                                     | -1.083  | 0.0458 |
| 227777_at   | C10orf18  | chromosome 10 open reading frame 18                                           | -0.8472 | 0.0104 |
| 227782_at   | ZBTB7C    | zinc finger and BTB domain containing 7C                                      | -1.3794 | 0.0023 |
| 227783_at   | CCDC57    | coiled-coil domain containing 57, similar to coiled-coil domain containing 57 | -0.281  | 0.0003 |
| 227788_at   |           | CDNA FLJ34165 fis; clone FCBBF3014770                                         | -1.3785 | 0      |
| 227791_at   | SLC9A9    | solute carrier family 9 (sodium/hydrogen exchanger); member 9                 | -0.8449 | 0.0139 |
| 227806_at   | C16orf74  | chromosome 16 open reading frame 74                                           | -0.188  | 0.0206 |
| 227819_at   | LGR6      | leucine-rich repeat-containing G protein-coupled receptor 6                   | -0.1969 | 0.0176 |
| 227821_at   | LGI4      | leucine-rich repeat LGI family; member 4                                      | -0.2371 | 0.0025 |
| 227826_s_at |           | CDNA clone IMAGE:4791597                                                      | -4.9033 | 0      |
| 227827_at   |           | CDNA clone IMAGE:4791597                                                      | -4.7891 | 0      |
| 227838_at   |           | CDNA FLJ12425 fis; clone MAMMA1003104                                         | -2.3263 | 0.0005 |
| 227840_at   | LOC130355 | hypothetical protein LOC130355                                                | -0.5986 | 0.0223 |
| 227850_x_at | CDC42EP5  | CDC42 effector protein (Rho GTPase binding) 5                                 | -1.0228 | 0.0456 |
| 227855_at   | FLJ10357  | hypothetical protein FLJ10357                                                 | -0.7443 | 0.0275 |
| 227863_at   | CTSD      | cathepsin D                                                                   | -3.0306 | 0.0001 |
| 227865_at   | C9orf103  | chromosome 9 open reading frame 103                                           | -1.6113 | 0      |
| 227867_at   | LOC129293 | hypothetical protein LOC129293                                                | -0.2484 | 0.0131 |
| 227874_at   |           | MRNA; cDNA DKFZp586N0121 (from clone DKFZp586N0121)                           | -3.3745 | 0      |
| 227879_at   | ALKBH7    | AlkB; alkylation repair homolog 7 (E. coli)                                   | -0.2369 | 0.0009 |
| 227881_s_at | C18orf17  | Chromosome 18 open reading frame 17                                           | -0.16   | 0.0105 |
| 227885_at   | LOC400236 | Hypothetical LOC400236                                                        | -0.2224 | 0.0294 |
| 227887_at   | LOC400236 | hypothetical LOC400236                                                        | -0.6721 | 0      |
| 227893_at   | C9orf130  | chromosome 9 open reading frame 130                                           | -0.2916 | 0.0043 |
| 227899_at   | VIT       | vitrin                                                                        | -0.2031 | 0.0168 |
| 227900_at   | CBLB      | Cas-Br-M (murine) ecotropic retroviral transforming sequence b                | -0.8845 | 0.0064 |



|             |           |                                                                                              |         |        |
|-------------|-----------|----------------------------------------------------------------------------------------------|---------|--------|
| 227925_at   | FLJ39051  | Hypothetical gene supported by AK096370                                                      | -2.3217 | 0      |
| 227932_at   | ARIH2     | ariadne homolog 2 (Drosophila)                                                               | -0.8333 | 0.0032 |
| 227935_s_at | PCGF5     | polycomb group ring finger 5                                                                 | -1.4567 | 0.0019 |
| 227947_at   | PHACTR2   | phosphatase and actin regulator 2                                                            | -1.2114 | 0.0034 |
| 227957_at   | GSN       | Gelsolin (amyloidosis; Finnish type)                                                         | -0.1133 | 0.0182 |
| 227958_s_at | GSN       | Gelsolin (amyloidosis; Finnish type)                                                         | -0.121  | 0.0164 |
| 227962_at   | ACOX1     | acyl-Coenzyme A oxidase 1; palmitoyl                                                         | -1.4882 | 0.0004 |
| 227968_at   | PDDC1     | Parkinson disease 7 domain containing 1                                                      | -0.4534 | 0.0048 |
| 227969_at   | LOC400960 | hypothetical gene supported by BC040598                                                      | -0.5177 | 0.0001 |
| 227971_at   | NRK       | Nik related kinase                                                                           | -2.3405 | 0.0181 |
| 227973_at   | FLJ38973  | hypothetical protein FLJ38973                                                                | -0.4447 | 0.011  |
| 227979_at   |           | CDNA FLJ36727 fis; clone UTERU2012286                                                        | -0.7108 | 0.0393 |
| 227989_at   | LTBP4     | Latent transforming growth factor beta binding protein 4                                     | -0.1822 | 0.0084 |
| 227995_at   |           | MRNA; cDNA DKFZp564O0862 (from clone DKFZp564O0862)                                          | -1.3498 | 0.0003 |
| 227998_at   | S100A16   | S100 calcium binding protein A16                                                             | -2.8141 | 0      |
| 228000_at   | ADC       | arginine decarboxylase                                                                       | -0.3182 | 0.0087 |
| 228002_at   | GTPBP4    | GTP binding protein 4, isopentenyl-diphosphate delta isomerase 2                             | -1.6356 | 0      |
| 228006_at   | PTEN      | phosphatase and tensin homolog (mutated in multiple advanced cancers 1)                      | -1.0696 | 0.0018 |
| 228015_s_at | TRIM8     | Tripartite motif-containing 8                                                                | -0.1115 | 0.036  |
| 228019_s_at | MRPS18C   | mitochondrial ribosomal protein S18C                                                         | -0.484  | 0.0061 |
| 228022_at   | CCDC18    | coiled-coil domain containing 18                                                             | -0.1241 | 0.0121 |
| 228025_s_at | PPP2R2C   | protein phosphatase 2 (formerly 2A); regulatory subunit B; gamma isoform                     | -0.1392 | 0.0077 |
| 228037_at   |           | CDNA clone IMAGE:5162874                                                                     | -1.2549 | 0      |
| 228042_at   | ADPRH     | ADP-ribosylarginine hydrolase                                                                | -0.3636 | 0.0082 |
| 228045_at   |           | MRNA; cDNA DKFZp451K063 (from clone DKFZp451K063)                                            | -1.4443 | 0.0018 |
| 228048_at   | C10orf41  | chromosome 10 open reading frame 41                                                          | -0.2881 | 0.0142 |
| 228049_x_at |           | Transcribed locus; strongly similar to XP_001172939.1 hypothetical protein [Pan troglodytes] | -0.763  | 0.0126 |
| 228059_x_at | MRPS22    | mitochondrial ribosomal protein S22                                                          | -0.5147 | 0.0001 |
| 228062_at   | NAP1L5    | nucleosome assembly protein 1-like 5                                                         | -2.4002 | 0.003  |
| 228063_s_at | NAP1L5    | nucleosome assembly protein 1-like 5                                                         | -2.278  | 0.0039 |
| 228065_at   | BCL9L     | B-cell CLL/lymphoma 9-like                                                                   | -0.5059 | 0.0108 |
| 228070_at   |           | CDNA FLJ34250 fis; clone FCBBF4000529                                                        | -0.4247 | 0.0108 |
| 228071_at   | GIMAP7    | GTPase; IMAP family member 7                                                                 | -1.3743 | 0.0008 |
| 228072_at   | SYT12     | synaptotagmin XII                                                                            | -0.7622 | 0.0002 |

|             |           |                                                                             |         |        |
|-------------|-----------|-----------------------------------------------------------------------------|---------|--------|
| 228075_x_at | TFB1M     | transcription factor B1; mitochondrial                                      | -0.6992 | 0.0255 |
| 228083_at   | CACNA2D4  | calcium channel; voltage-dependent; alpha 2/delta subunit 4                 | -0.5105 | 0.0094 |
| 228089_x_at | LOC374395 | similar to RIKEN cDNA 1810059G22                                            | -0.6086 | 0.0069 |
| 228092_at   | CREM      | cAMP responsive element modulator                                           | -3.2275 | 0      |
| 228096_at   | C1orf151  | chromosome 1 open reading frame 151                                         | -0.3868 | 0.0192 |
| 228097_at   | MYLIP     | myosin regulatory light chain interacting protein                           | -0.7139 | 0.002  |
| 228098_s_at | MYLIP     | myosin regulatory light chain interacting protein                           | -1.7353 | 0.0012 |
| 228103_s_at | NRP2      | Neuropilin 2                                                                | -0.1328 | 0.0119 |
| 228115_at   |           | Full length insert cDNA clone ZE05E03                                       | -2.0856 | 0      |
| 228127_at   |           | CDNA FLJ41679 fis; clone HCASM2003212                                       | -1.3831 | 0.0141 |
| 228128_x_at | PAPPA     | pregnancy-associated plasma protein A; pappalysin 1                         | -2.0938 | 0.0023 |
| 228139_at   | RIPK3     | receptor-interacting serine-threonine kinase 3                              | -0.1662 | 0.0327 |
| 228142_at   | UCRC      | ubiquinol-cytochrome c reductase complex (7.2 kD)                           | -0.8721 | 0.0227 |
| 228143_at   | CP        | ceruloplasmin (ferroxidase)                                                 | -0.7753 | 0.0004 |
| 228159_at   |           | CDNA FLJ38039 fis; clone CTONG2013934                                       | -0.9024 | 0.0096 |
| 228178_s_at | HAS3      | hyaluronan synthase 3                                                       | -0.1883 | 0.0128 |
| 228183_s_at | RPAIN     | RPA interacting protein                                                     | -0.3702 | 0.039  |
| 228186_s_at | RSPO3     | R-spondin 3 homolog (Xenopus laevis)                                        | -5.1589 | 0      |
| 228188_at   |           |                                                                             | -2.211  | 0      |
| 228193_s_at | C13orf15  | Chromosome 13 open reading frame 15                                         | -0.1353 | 0.0313 |
| 228195_at   | MGC13057  | hypothetical protein MGC13057                                               | -0.6875 | 0.0214 |
| 228202_at   | PLN       | Phospholamban                                                               | -1.6163 | 0      |
| 228203_at   | B3GNT1    | UDP-GlcNAc:betaGal beta-1;3-N-acetylglucosaminyltransferase 1               | -0.1489 | 0.0047 |
| 228204_at   | PSMB4     | Proteasome (prosome; macropain) subunit; beta type; 4                       | -0.7233 | 0.0138 |
| 228224_at   | PRELP     | proline/arginine-rich end leucine-rich repeat protein                       | -2.1775 | 0      |
| 228233_at   | FREM1     | FRAS1 related extracellular matrix 1                                        | -0.6796 | 0      |
| 228249_at   | C11orf74  | chromosome 11 open reading frame 74                                         | -0.7963 | 0.0003 |
| 228254_at   |           | Transcribed locus                                                           | -0.7961 | 0.0011 |
| 228263_at   | GRASP     | GRP1 (general receptor for phosphoinositides 1)-associated scaffold protein | -0.487  | 0.003  |
| 228264_at   | PHACS     | 1-aminocyclopropane-1-carboxylate synthase                                  | -0.9469 | 0.0003 |
| 228265_at   |           | CDNA clone IMAGE:6214748                                                    | -0.1176 | 0.0208 |
| 228268_at   | FMO2      | flavin containing monooxygenase 2 (non-functional)                          | -6.2067 | 0      |
| 228275_at   |           | CDNA FLJ32438 fis; clone SKMUS2001402                                       | -0.5785 | 0.0349 |

|             |           |                                                                                                                |         |        |
|-------------|-----------|----------------------------------------------------------------------------------------------------------------|---------|--------|
| 228292_at   |           | Transcribed locus; moderately similar to XP_001084705.1 similar to bile acid beta-glucosidase [Macaca mulatta] | -0.7989 | 0.0442 |
| 228294_s_at | ZNF775    | Zinc finger protein 775                                                                                        | -0.1362 | 0.0144 |
| 228298_at   | FAM113B   | family with sequence similarity 113; member B                                                                  | -1.9488 | 0.0072 |
| 228299_at   | KCTD20    | Potassium channel tetramerisation domain containing 20                                                         | -0.9418 | 0.0008 |
| 228314_at   | LRRC8C    | leucine rich repeat containing 8 family; member C                                                              | -1.0782 | 0.0034 |
| 228317_at   | ZFAND5    | Zinc finger; AN1-type domain 5                                                                                 | -0.1445 | 0.0188 |
| 228325_at   | KIAA0146  | KIAA0146                                                                                                       | -2.7058 | 0      |
| 228332_s_at | C11orf31  | chromosome 11 open reading frame 31                                                                            | -0.4425 | 0.0012 |
| 228333_at   |           | Full length insert cDNA clone YT94E02                                                                          | -2.0216 | 0      |
| 228335_at   | CLDN11    | claudin 11 (oligodendrocyte transmembrane protein)                                                             | -2.5863 | 0      |
| 228349_at   | KIAA1958  | KIAA1958                                                                                                       | -1.5829 | 0      |
| 228370_at   | SNRPN     | Small nuclear ribonucleoprotein polypeptide N                                                                  | -1.9402 | 0.0035 |
| 228375_at   | IGSF11    | immunoglobulin superfamily; member 11                                                                          | -2.4962 | 0      |
| 228376_at   | GGTA1     | glycoprotein; alpha-galactosyltransferase 1, similar to glycoprotein galactosyltransferase alpha 1; 3          | -2.4467 | 0      |
| 228380_at   |           | Transcribed locus                                                                                              | -0.5733 | 0.0006 |
| 228381_at   | ATF7IP2   | Activating transcription factor 7 interacting protein 2                                                        | -1.9881 | 0.0006 |
| 228383_at   | PNPLA7    | patatin-like phospholipase domain containing 7                                                                 | -0.3748 | 0.0001 |
| 228384_s_at | C10orf33  | chromosome 10 open reading frame 33                                                                            | -1.3229 | 0      |
| 228391_at   | CYP4V2    | cytochrome P450; family 4; subfamily V; polypeptide 2                                                          | -1.5171 | 0.0208 |
| 228395_at   | GLT8D1    | Glycosyltransferase 8 domain containing 1                                                                      | -0.5974 | 0      |
| 228396_at   | PRKG1     | protein kinase; cGMP-dependent; type I                                                                         | -2.2005 | 0.0001 |
| 228399_at   | OSR1      | odd-skipped related 1 (Drosophila)                                                                             | -0.2241 | 0.0037 |
| 228407_at   | SCUBE3    | signal peptide; CUB domain; EGF-like 3                                                                         | -2.8508 | 0      |
| 228409_at   | KIAA1881  | KIAA1881                                                                                                       | -0.7321 | 0.0001 |
| 228411_at   | PARD3B    | par-3 partitioning defective 3 homolog B (C. elegans)                                                          | -0.6667 | 0.0001 |
| 228420_at   | PDCD2     | programmed cell death 2                                                                                        | -0.6537 | 0      |
| 228421_s_at | EFEMP1    | EGF-containing fibulin-like extracellular matrix protein 1                                                     | -0.1004 | 0.0204 |
| 228425_at   | LOC654433 | hypothetical LOC654433                                                                                         | -1.1463 | 0.0377 |
| 228428_at   | LOC729758 | hypothetical protein LOC729758                                                                                 | -0.2127 | 0.0013 |
| 228436_at   | KCNC4     | potassium voltage-gated channel; Shaw-related subfamily; member 4                                              | -0.3775 | 0      |
| 228444_at   |           | Transcribed locus                                                                                              | -0.2043 | 0.0346 |
| 228448_at   | MAP6      | microtubule-associated protein 6                                                                               | -1.2388 | 0.0003 |

|             |           |                                                                                                                                    |         |        |
|-------------|-----------|------------------------------------------------------------------------------------------------------------------------------------|---------|--------|
| 228449_at   |           | Transcribed locus; strongly similar to NP_694589.1 protein LOC150291 [Homo sapiens]                                                | -0.2056 | 0.0149 |
| 228452_at   | C17orf39  | chromosome 17 open reading frame 39                                                                                                | -0.4317 | 0.0093 |
| 228456_s_at | LOC149832 | hypothetical protein LOC149832                                                                                                     | -0.6572 | 0.0076 |
| 228466_at   | MGC29891  | hypothetical protein MGC29891                                                                                                      | -0.4127 | 0.0499 |
| 228469_at   | PPID      | Peptidylprolyl isomerase D (cyclophilin D)                                                                                         | -2.1576 | 0      |
| 228477_at   | FLJ10154  | hypothetical protein FLJ10154                                                                                                      | -0.5526 | 0.0229 |
| 228479_at   | SOAT1     | sterol O-acyltransferase (acyl-Coenzyme A: cholesterol acyltransferase) 1                                                          | -1.3698 | 0      |
| 228482_at   | CDRT4     | CMT1A duplicated region transcript 4                                                                                               | -0.6941 | 0.0493 |
| 228488_at   | TBC1D16   | TBC1 domain family; member 16                                                                                                      | -0.244  | 0.0496 |
| 228491_at   | KRT19     | Keratin 19                                                                                                                         | -0.1369 | 0.0066 |
| 228492_at   | USP9Y     | ubiquitin specific peptidase 9; Y-linked (fat facets-like; Drosophila)                                                             | -2.8581 | 0.0012 |
| 228494_at   | PPP1R9A   | protein phosphatase 1; regulatory (inhibitor) subunit 9A                                                                           | -1.1003 | 0.0029 |
| 228496_s_at | CRIM1     | Cysteine rich transmembrane BMP regulator 1 (chordin-like)                                                                         | -1.0476 | 0.0087 |
| 228498_at   |           | Transcribed locus; strongly similar to XP_531236.1 hypothetical protein XP_531236 [Pan troglodytes]                                | -1.3278 | 0.0005 |
| 228504_at   |           | Transcribed locus                                                                                                                  | -4.5805 | 0      |
| 228508_at   | MAML3     | mastermind-like 3 (Drosophila)                                                                                                     | -0.1232 | 0.0309 |
| 228523_at   | NANOS1    | nanos homolog 1 (Drosophila)                                                                                                       | -3.6717 | 0      |
| 228524_at   | ADCK5     | aarF domain containing kinase 5                                                                                                    | -0.6675 | 0.0002 |
| 228525_at   |           | Transcribed locus; strongly similar to XP_512572.1 similar to low density lipoprotein receptor-related protein 3 [Pan troglodytes] | -0.4018 | 0.0392 |
| 228526_at   | NANOS1    | Nanos homolog 1 (Drosophila)                                                                                                       | -0.2932 | 0.0008 |
| 228528_at   |           | CDNA FLJ41270 fis; clone BRAMY2036387                                                                                              | -2.9181 | 0      |
| 228532_at   | C1orf162  | chromosome 1 open reading frame 162                                                                                                | -3.5684 | 0      |
| 228533_at   |           |                                                                                                                                    | -0.1537 | 0.0132 |
| 228534_s_at |           |                                                                                                                                    | -0.1064 | 0.0391 |
| 228536_at   | LOC90826  | hypothetical protein BC004337                                                                                                      | -2.9974 | 0      |
| 228540_at   | QKI       | quaking homolog; KH domain RNA binding (mouse)                                                                                     | -0.4001 | 0.0007 |
| 228543_at   | CSRP2BP   | CSRP2 binding protein                                                                                                              | -0.5448 | 0.0343 |
| 228555_at   | CAMK2D    | Calcium/calmodulin-dependent protein kinase (CaM kinase) II delta                                                                  | -1.3228 | 0.0005 |
| 228557_at   | L3MBTL4   | l(3)mbt-like 4 (Drosophila)                                                                                                        | -0.7452 | 0      |
| 228560_at   |           | Full length insert cDNA clone YY51E04                                                                                              | -0.5576 | 0.0095 |
| 228562_at   |           | Transcribed locus                                                                                                                  | -0.5826 | 0.0462 |
| 228565_at   | KIAA1804  | mixed lineage kinase 4                                                                                                             | -1.1225 | 0.0019 |
| 228568_at   | Gcom1     | GRINL1A combined protein                                                                                                           | -1.6475 | 0.0043 |

|             |           |                                                                                                    |         |        |
|-------------|-----------|----------------------------------------------------------------------------------------------------|---------|--------|
| 228572_at   | GRB2      | growth factor receptor-bound protein 2                                                             | -0.389  | 0.0013 |
| 228573_at   |           | Full-length cDNA clone CS0DD001YA12 of Neuroblastoma Cot 50-normalized of Homo sapiens (human)     | -1.7848 | 0.0004 |
| 228576_s_at | MXRA8     | Matrix-remodelling associated 8                                                                    | -0.1235 | 0.0038 |
| 228586_at   | ENG       | Endoglin (Osler-Rendu-Weber syndrome 1)                                                            | -0.1382 | 0.0035 |
| 228591_at   | TNRC6C    | Trinucleotide repeat containing 6C                                                                 | -0.1279 | 0.0149 |
| 228593_at   | LOC339483 | hypothetical LOC339483                                                                             | -0.7371 | 0.0001 |
| 228598_at   | DPP10     | dipeptidyl-peptidase 10                                                                            | -1.771  | 0.0364 |
| 228599_at   | MS4A1     | membrane-spanning 4-domains; subfamily A; member 1                                                 | -0.149  | 0.0075 |
| 228603_at   |           | Transcribed locus                                                                                  | -0.8153 | 0.0498 |
| 228612_at   |           | CDNA clone IMAGE:5277380                                                                           | -0.9089 | 0.0045 |
| 228615_at   | LOC286161 | hypothetical protein LOC286161                                                                     | -1.1762 | 0      |
| 228618_at   | PEAR1     | platelet endothelial aggregation receptor 1                                                        | -1.1887 | 0      |
| 228622_s_at | DNAJC4    | DnaJ (Hsp40) homolog; subfamily C; member 4                                                        | -0.9429 | 0      |
| 228634_s_at | CSDA      | Cold shock domain protein A                                                                        | -0.1271 | 0.0062 |
| 228635_at   | PCDH10    | protocadherin 10                                                                                   | -1.6903 | 0      |
| 228642_at   | HOXA2     | Homeobox A2                                                                                        | -2.5386 | 0      |
| 228661_s_at |           | CDNA FLJ11489 fis; clone HEMBA1001915                                                              | -1.343  | 0.0016 |
| 228665_at   | CYYR1     | cysteine/tyrosine-rich 1                                                                           | -2.3053 | 0.0001 |
| 228670_at   | TEP1      | telomerase-associated protein 1                                                                    | -0.992  | 0.0015 |
| 228673_s_at | EML4      | Echinoderm microtubule associated protein like 4                                                   | -0.1747 | 0.0037 |
| 228678_at   | FAM116B   | family with sequence similarity 116; member B                                                      | -0.2276 | 0.0013 |
| 228689_at   | NDUFA11   | NADH dehydrogenase (ubiquinone) 1 alpha subcomplex; 11; 14.7kDa                                    | -0.219  | 0.0306 |
| 228692_at   |           | CDNA FLJ13569 fis; clone PLACE1008369                                                              | -0.5316 | 0.0056 |
| 228696_at   | SLC45A3   | solute carrier family 45; member 3                                                                 | -0.5036 | 0.0001 |
| 228698_at   | SOX7      | SRY (sex determining region Y)-box 7                                                               | -0.9702 | 0.0483 |
| 228701_at   | C8orf46   | chromosome 8 open reading frame 46                                                                 | -0.1827 | 0.0118 |
| 228716_at   | THRB      | thyroid hormone receptor; beta (erythroblastic leukemia viral (v-erb-a) oncogene homolog 2; avian) | -2.5979 | 0      |
| 228726_at   | SERPINB1  | serpin peptidase inhibitor; clade B (ovalbumin); member 1                                          | -1.272  | 0.0002 |
| 228727_at   | ANXA11    | annexin A11                                                                                        | -0.2608 | 0.0157 |
| 228730_s_at | SCRN2     | secernin 2                                                                                         | -0.5262 | 0.0472 |
| 228731_at   |           | CDNA clone IMAGE:5273964                                                                           | -1.3084 | 0.0111 |
| 228732_at   |           | CDNA clone IMAGE:5273964                                                                           | -0.4244 | 0.0383 |
| 228733_at   | PUSL1     | pseudouridylylase synthase-like 1                                                                  | -0.6767 | 0.0025 |
| 228736_at   | HEL308    | DNA helicase HEL308                                                                                | -0.7802 | 0.0194 |
| 228739_at   | CYS1      | cystin 1                                                                                           | -0.4345 | 0.0071 |

|             |           |                                                                                                                                                                                                                                   |         |        |
|-------------|-----------|-----------------------------------------------------------------------------------------------------------------------------------------------------------------------------------------------------------------------------------|---------|--------|
| 228746_s_at | CDV3      | CDV3 homolog (mouse)                                                                                                                                                                                                              | -1.0979 | 0.0042 |
| 228749_at   | ZDBF2     | zinc finger; DBF-type containing 2                                                                                                                                                                                                | -1.7411 | 0.0001 |
| 228754_at   | SLC6A6    | solute carrier family 6 (neurotransmitter transporter; taurine); member 6                                                                                                                                                         | -1.5728 | 0      |
| 228763_at   | CHMP4A    | chromatin modifying protein 4A, magnesium-dependent phosphatase 1                                                                                                                                                                 | -0.5456 | 0.0138 |
| 228771_at   | ADRBK2    | adrenergic; beta; receptor kinase 2                                                                                                                                                                                               | -1.8387 | 0.0002 |
| 228772_at   | HNMT      | histamine N-methyltransferase                                                                                                                                                                                                     | -1.3891 | 0.0001 |
| 228775_at   |           |                                                                                                                                                                                                                                   | -0.9011 | 0.0152 |
| 228777_at   | KBTBD3    | kelch repeat and BTB (POZ) domain containing 3                                                                                                                                                                                    | -0.5165 | 0.0007 |
| 228779_at   | LOC440456 | similar to pleckstrin homology domain containing; family M (with RUN domain) member 1; adapter protein 162, similar to similar to pleckstrin homology domain containing; family M (with RUN domain) member 1; adapter protein 162 | -0.1946 | 0.0064 |
| 228780_at   |           | MRNA; clone ICRFp507B0451                                                                                                                                                                                                         | -0.1395 | 0.0286 |
| 228789_at   | MTMR6     | myotubularin related protein 6                                                                                                                                                                                                    | -0.8947 | 0      |
| 228807_at   |           |                                                                                                                                                                                                                                   | -0.4221 | 0.0018 |
| 228809_at   | CXorf40A  | chromosome X open reading frame 40A                                                                                                                                                                                               | -4.196  | 0      |
| 228811_at   |           | Transcribed locus                                                                                                                                                                                                                 | -1.1372 | 0.0013 |
| 228812_at   |           | Transcribed locus                                                                                                                                                                                                                 | -1.3297 | 0.0006 |
| 228813_at   | HDAC4     | histone deacetylase 4                                                                                                                                                                                                             | -1.1021 | 0.0018 |
| 228826_at   |           | Homo sapiens; clone IMAGE:5215917; mRNA                                                                                                                                                                                           | -0.4548 | 0.0092 |
| 228828_at   |           | Homo sapiens; clone IMAGE:5215917; mRNA                                                                                                                                                                                           | -0.4045 | 0.0017 |
| 228834_at   | TOB1      | transducer of ERBB2; 1                                                                                                                                                                                                            | -1.9046 | 0.0032 |
| 228840_at   | AMOTL1    | angiomin like 1                                                                                                                                                                                                                   | -0.1514 | 0.05   |
| 228844_at   | SLC13A5   | solute carrier family 13 (sodium-dependent citrate transporter); member 5                                                                                                                                                         | -0.8019 | 0.0153 |
| 228845_at   | P76       | hypothetical protein LOC196463                                                                                                                                                                                                    | -1.0221 | 0.0153 |
| 228850_s_at |           |                                                                                                                                                                                                                                   | -3.0971 | 0.0001 |
| 228855_at   | LOC729777 | similar to Peroxisomal coenzyme A diphosphatase NUDT7 (Nucleoside diphosphate-linked moiety X motif 7) (Nudix motif 7)                                                                                                            | -1.328  | 0.0269 |
| 228857_at   | LOC285831 | hypothetical protein LOC285831                                                                                                                                                                                                    | -0.4765 | 0.0302 |
| 228870_at   | FAM84B    | family with sequence similarity 84; member B                                                                                                                                                                                      | -0.1109 | 0.0239 |
| 228871_at   |           |                                                                                                                                                                                                                                   | -0.2918 | 0      |
| 228874_at   | LOC653583 | Similar to pleckstrin homology-like domain; family B; member 1                                                                                                                                                                    | -0.1631 | 0.0179 |
| 228877_at   | RGL3      | ral guanine nucleotide dissociation stimulator-like 3                                                                                                                                                                             | -1.0815 | 0.0295 |
| 228879_at   |           |                                                                                                                                                                                                                                   | -0.8642 | 0.0085 |

|             |          |                                                                                                   |         |        |
|-------------|----------|---------------------------------------------------------------------------------------------------|---------|--------|
| 228882_at   | TUB      | tubby homolog (mouse)                                                                             | -1.6185 | 0.0016 |
| 228885_at   | MAMDC2   | MAM domain containing 2                                                                           | -2.9308 | 0.0001 |
| 228888_at   | STAC2    | SH3 and cysteine rich domain 2                                                                    | -0.3656 | 0.0191 |
| 228890_at   | ATOH8    | atonal homolog 8 (Drosophila)                                                                     | -0.4149 | 0.0302 |
| 228892_at   | SH3RF2   | SH3 domain containing ring finger 2                                                               | -0.2102 | 0.0121 |
| 228893_at   |          | CDNA clone IMAGE:30332316                                                                         | -0.15   | 0.019  |
| 228896_at   |          | Transcribed locus                                                                                 | -0.212  | 0.0027 |
| 228898_s_at | SMARCB1  | SWI/SNF related; matrix associated; actin dependent regulator of chromatin; subfamily b; member 1 | -0.3695 | 0.0012 |
| 228903_at   | FLJ37464 | hypothetical protein FLJ37464                                                                     | -0.279  | 0.007  |
| 228915_at   | DACH1    | dachshund homolog 1 (Drosophila)                                                                  | -2.4214 | 0.0053 |
| 228916_at   | CWF19L2  | CWF19-like 2; cell cycle control (S. pombe)                                                       | -0.7269 | 0.0053 |
| 228918_at   |          | CDNA FLJ32207 fis; clone PLACE6003204                                                             | -0.2191 | 0.0467 |
| 228922_at   | SHF      | Src homology 2 domain containing F                                                                | -1.0322 | 0      |
| 228924_s_at | UBE2J1   | Ubiquitin-conjugating enzyme E2; J1 (UBC6 homolog; yeast)                                         | -0.1935 | 0.0054 |
| 228937_at   | C13orf31 | chromosome 13 open reading frame 31                                                               | -1.643  | 0.0004 |
| 228939_at   | OAF      | OAF homolog (Drosophila)                                                                          | -0.2286 | 0.0264 |
| 228943_at   | MAP6     | microtubule-associated protein 6                                                                  | -1.1438 | 0.004  |
| 228947_x_at | C16orf30 | chromosome 16 open reading frame 30                                                               | -0.2153 | 0.0005 |
| 228967_at   | EIF1     | Eukaryotic translation initiation factor 1                                                        | -0.8164 | 0.0003 |
| 228973_at   | DLG2     | discs; large homolog 2; chapsyn-110 (Drosophila)                                                  | -1.4792 | 0.0008 |
| 228976_at   | ICOSLG   | inducible T-cell co-stimulator ligand                                                             | -0.2583 | 0.0047 |
| 229005_at   |          | CDNA: FLJ23331 fis; clone HEP12664                                                                | -0.1823 | 0.0364 |
| 229011_at   |          | Transcribed locus                                                                                 | -0.6049 | 0.0015 |
| 229012_at   | C9orf24  | chromosome 9 open reading frame 24                                                                | -0.4213 | 0.0001 |
| 229014_at   | FLJ42709 | hypothetical gene supported by AK124699                                                           | -2.135  | 0.0002 |
| 229021_at   |          | CDNA: FLJ23331 fis; clone HEP12664                                                                | -0.5531 | 0.0002 |
| 229023_at   | SFT2D3   | SFT2 domain containing 3                                                                          | -0.2205 | 0.0167 |
| 229024_at   |          | CDNA FLJ10151 fis; clone HEMBA1003402                                                             | -2.0559 | 0.0019 |
| 229031_at   |          | CDNA FLJ25763 fis; clone TST06294                                                                 | -0.4223 | 0.0144 |
| 229048_at   |          | Full length insert cDNA clone ZD86A03                                                             | -0.1815 | 0.0144 |
| 229058_at   | ANKRD16  | ankyrin repeat domain 16                                                                          | -0.3836 | 0.0497 |
| 229063_s_at | CCDC107  | coiled-coil domain containing 107                                                                 | -0.6274 | 0.0028 |
| 229076_s_at |          | Transcribed locus                                                                                 | -0.22   | 0.0362 |

|             |           |                                                                                                |         |        |
|-------------|-----------|------------------------------------------------------------------------------------------------|---------|--------|
| 229083_at   |           | Full-length cDNA clone CS0DC006YB07 of Neuroblastoma Cot 25-normalized of Homo sapiens (human) | -1.0633 | 0.0005 |
| 229088_at   |           |                                                                                                | -0.746  | 0.0075 |
| 229091_s_at | CCNJ      | cyclin J                                                                                       | -0.6089 | 0.0163 |
| 229092_at   |           | Full length insert cDNA clone YX37E06                                                          | -0.6614 | 0.009  |
| 229098_s_at | C5orf24   | Chromosome 5 open reading frame 24                                                             | -0.1211 | 0.0162 |
| 229101_at   | LOC150166 | Hypothetical protein LOC150166                                                                 | -0.9562 | 0.0097 |
| 229106_at   | DYNLL2    | dynein; light chain; LC8-type 2                                                                | -1.6489 | 0      |
| 229110_at   |           | CDNA clone IMAGE:4794876                                                                       | -0.8619 | 0.0122 |
| 229113_s_at | C1orf86   | chromosome 1 open reading frame 86                                                             | -1.2907 | 0      |
| 229116_at   | CNKSR2    | connector enhancer of kinase suppressor of Ras 2                                               | -0.6498 | 0.0269 |
| 229119_s_at | ZSWIM7    | zinc finger; SWIM-type containing 7                                                            | -1.7717 | 0.0001 |
| 229120_s_at | CDC42SE1  | CDC42 small effector 1                                                                         | -0.6637 | 0.0002 |
| 229121_at   |           | CDNA FLJ44441 fis; clone UTERU2020242                                                          | -1.2686 | 0      |
| 229124_at   | PROK1     | prokineticin 1                                                                                 | -1.2409 | 0.0026 |
| 229125_at   | ANKRD38   | ankyrin repeat domain 38                                                                       | -0.1883 | 0.0029 |
| 229127_at   |           | CDNA FLJ31517 fis; clone NT2RI2000007                                                          | -2.8184 | 0.0003 |
| 229136_s_at |           | Transcribed locus                                                                              | -0.2219 | 0.0215 |
| 229146_at   | C7orf31   | chromosome 7 open reading frame 31                                                             | -0.9782 | 0.0005 |
| 229149_at   |           |                                                                                                | -0.1952 | 0.0015 |
| 229151_at   | SLC14A1   | Solute carrier family 14 (urea transporter); member 1 (Kidd blood group)                       | -0.3591 | 0      |
| 229154_at   | WNT10A    | Wingless-type MMTV integration site family; member 10A                                         | -0.1324 | 0.0186 |
| 229156_s_at |           | CDNA clone IMAGE:5274141                                                                       | -0.2878 | 0.0057 |
| 229157_at   |           | CDNA clone IMAGE:5274141                                                                       | -0.3252 | 0.0003 |
| 229160_at   | MUM1L1    | melanoma associated antigen (mutated) 1-like 1                                                 | -2.8423 | 0      |
| 229164_s_at | ABTB1     | ankyrin repeat and BTB (POZ) domain containing 1                                               | -0.5526 | 0.0039 |
| 229168_at   | COL23A1   | collagen; type XXIII; alpha 1                                                                  | -0.1632 | 0.0064 |
| 229171_at   | MGC16385  | Hypothetical protein MGC16385                                                                  | -0.1032 | 0.0096 |
| 229172_at   | HSPA12B   | heat shock 70kD protein 12B                                                                    | -0.4802 | 0.0004 |
| 229175_at   | SMYD4     | SET and MYND domain containing 4                                                               | -2.0023 | 0      |
| 229176_at   | ANKH      | ankylosis; progressive homolog (mouse)                                                         | -0.1685 | 0.0095 |
| 229177_at   | MGC45438  | hypothetical protein MGC45438                                                                  | -0.5392 | 0      |
| 229185_at   |           | CDNA clone IMAGE:4829282                                                                       | -0.1001 | 0.0486 |
| 229201_at   |           | Full-length cDNA clone CS0DF014YC15 of Fetal brain of Homo sapiens (human)                     | -0.6114 | 0.0058 |
| 229204_at   | HP1BP3    | Heterochromatin protein 1; binding protein 3                                                   | -0.4504 | 0.0126 |



|             |           |                                                                                                |         |        |
|-------------|-----------|------------------------------------------------------------------------------------------------|---------|--------|
| 229210_at   | RNASEH2B  | ribonuclease H2; subunit B                                                                     | -0.447  | 0.0008 |
| 229213_at   |           | Transcribed locus                                                                              | -0.3646 | 0      |
| 229221_at   | CD44      | CD44 molecule (Indian blood group)                                                             | -0.1107 | 0.0426 |
| 229230_at   | OSTalpha  | organic solute transporter alpha                                                               | -2.0661 | 0.0322 |
| 229239_x_at | SLCO4A1   | Solute carrier organic anion transporter family; member 4A1                                    | -0.1827 | 0.0071 |
| 229242_at   |           | Transcribed locus                                                                              | -0.7964 | 0.0093 |
| 229245_at   | PLEKHA6   | pleckstrin homology domain containing; family A member 6                                       | -0.6449 | 0      |
| 229253_at   | THEM4     | thioesterase superfamily member 4                                                              | -1.1674 | 0      |
| 229258_at   | KIF12     | kinesin family member 12                                                                       | -0.1287 | 0.0326 |
| 229265_at   | SKI       | v-ski sarcoma viral oncogene homolog (avian)                                                   | -1.3366 | 0.0002 |
| 229277_at   |           | Beta-1 adrenergic receptor mRNA; 3' UTR                                                        | -0.1437 | 0.0067 |
| 229280_s_at | FLJ22536  | hypothetical locus LOC401237                                                                   | -1.8409 | 0.0013 |
| 229287_at   | PCNX      | pecanex homolog (Drosophila)                                                                   | -1.0148 | 0.0021 |
| 229290_at   | DAPL1     | death associated protein-like 1                                                                | -5.8202 | 0      |
| 229295_at   | LOC150166 | hypothetical protein LOC150166                                                                 | -1.1664 | 0.0001 |
| 229296_at   |           | CDNA FLJ34873 fis; clone NT2NE2014950                                                          | -0.4028 | 0.006  |
| 229301_at   |           |                                                                                                | -0.1963 | 0.026  |
| 229308_at   |           | Transcribed locus                                                                              | -2.1364 | 0      |
| 229310_at   | KLHL29    | kelch-like 29 (Drosophila)                                                                     | -3.6287 | 0      |
| 229313_at   | TMEM16E   | transmembrane protein 16E                                                                      | -1.6744 | 0.0002 |
| 229319_at   |           | CDNA FLJ34311 fis; clone FEBRA2008255                                                          | -1.1964 | 0.0008 |
| 229320_at   | C2orf55   | chromosome 2 open reading frame 55                                                             | -0.309  | 0.0104 |
| 229323_at   | LOC387723 | hypothetical LOC387723, hypothetical protein LOC651940                                         | -1.0118 | 0      |
| 229326_at   | TNFSF13   | Tumor necrosis factor (ligand) superfamily; member 13                                          | -0.2151 | 0.0003 |
| 229329_s_at | SSU72     | SSU72 RNA polymerase II CTD phosphatase homolog (S. cerevisiae)                                | -0.1439 | 0.0135 |
| 229337_at   | USP2      | ubiquitin specific peptidase 2                                                                 | -1.5238 | 0.0071 |
| 229348_at   | UBIAD1    | UbiA prenyltransferase domain containing 1                                                     | -0.8187 | 0      |
| 229367_s_at | GIMAP6    | GTPase; IMAP family member 6                                                                   | -1.0484 | 0.0121 |
| 229368_s_at | ZFAND5    | Zinc finger; AN1-type domain 5                                                                 | -0.2858 | 0      |
| 229375_at   |           | Full-length cDNA clone CS0DC020YH17 of Neuroblastoma Cot 25-normalized of Homo sapiens (human) | -0.1645 | 0.0057 |
| 229377_at   | GRTP1     | growth hormone regulated TBC protein 1                                                         | -0.9752 | 0.0338 |
| 229378_at   | STOX1     | storkhead box 1                                                                                | -1.2314 | 0      |
| 229379_at   | AHDC1     | AT hook; DNA binding motif; containing 1                                                       | -0.1008 | 0.0354 |
| 229383_at   |           | CDNA FLJ34016 fis; clone FCBBF2002541                                                          | -0.9881 | 0.0091 |

|             |               |                                                                              |         |        |
|-------------|---------------|------------------------------------------------------------------------------|---------|--------|
| 229395_at   | STX4          | syntaxin 4                                                                   | -0.5055 | 0.0091 |
| 229396_at   | OVOL1         | ovo-like 1(Drosophila)                                                       | -0.1283 | 0.0274 |
| 229402_at   | SAMD13        | sterile alpha motif domain containing 13                                     | -1.0732 | 0.0001 |
| 229403_at   | B4GALT1       | UDP-Gal:betaGlcNAc beta 1,4-galactosyltransferase; polypeptide 1             | -0.1169 | 0.0252 |
| 229408_at   | HDAC5         | histone deacetylase 5                                                        | -0.1913 | 0.0167 |
| 229415_at   | CYCS          | cytochrome c; somatic                                                        | -1.2825 | 0.0027 |
| 229424_s_at | ARHGAP27      | Rho GTPase activating protein 27                                             | -0.1784 | 0.0354 |
| 229443_at   | C6orf125      | Chromosome 6 open reading frame 125                                          | -0.1295 | 0.0037 |
| 229444_at   | LOC729776     | hypothetical protein LOC729776                                               | -0.886  | 0.0207 |
| 229452_at   | TMEM88        | transmembrane protein 88                                                     | -1.1378 | 0      |
| 229458_s_at | GALK1         | Galactokinase 1                                                              | -0.1665 | 0.0104 |
| 229461_x_at | NEGR1         | neuronal growth regulator 1                                                  | -2.1615 | 0      |
| 229469_at   | CTD-2267G17.3 | X antigen family; member 2, X antigen family; member 2-like                  | -0.1879 | 0.0365 |
| 229471_s_at | SFRS2B        | Splicing factor; arginine/serine-rich 2B                                     | -0.1767 | 0.0109 |
| 229474_at   | MICAL3        | microtubule associated monooxygenase; calponin and LIM domain containing 3   | -0.2976 | 0.0131 |
| 229476_s_at | THRSP         | thyroid hormone responsive (SPOT14 homolog; rat)                             | -1.4331 | 0.0003 |
| 229477_at   | THRSP         | thyroid hormone responsive (SPOT14 homolog; rat)                             | -0.8351 | 0.0011 |
| 229480_at   |               | MRNA; cDNA DKFZp686I18116 (from clone DKFZp686I18116)                        | -1.2226 | 0.0013 |
| 229486_s_at | TMEM132A      | Transmembrane protein 132A                                                   | -0.2428 | 0.0134 |
| 229488_at   | OTUD7B        | OTU domain containing 7B                                                     | -0.3485 | 0.0355 |
| 229492_at   | VANGL1        | vang-like 1 (van gogh; Drosophila)                                           | -0.7563 | 0.0018 |
| 229496_at   | CLP1          | CLP1; cleavage and polyadenylation factor I subunit; homolog (S. cerevisiae) | -0.2487 | 0.0012 |
| 229499_at   | CAPN13        | calpain 13                                                                   | -0.1349 | 0.0222 |
| 229501_s_at | USP8          | Ubiquitin specific peptidase 8                                               | -0.425  | 0.0387 |
| 229503_at   | SLC15A4       | Solute carrier family 15; member 4                                           | -0.1401 | 0.0216 |
| 229505_at   | NAP1L4        | Nucleosome assembly protein 1-like 4                                         | -0.1324 | 0.0347 |
| 229508_at   | U2AF2         | U2 small nuclear RNA auxiliary factor 2                                      | -0.1711 | 0.021  |
| 229510_at   | NYD-SP21      | MS4A13 protein                                                               | -0.6341 | 0.0003 |
| 229515_at   | PAWR          | PRKC; apoptosis; WT1; regulator                                              | -0.8008 | 0.0007 |
| 229523_at   | TTMA          | Two transmembrane domain family member A                                     | -2.0466 | 0      |
| 229525_at   |               |                                                                              | -0.2181 | 0.0047 |
| 229526_at   | AQP11         | aquaporin 11                                                                 | -1.3741 | 0.0113 |
| 229529_at   | TCF21         | transcription factor 21                                                      | -0.5544 | 0      |
| 229535_at   | PTPMT1        | protein tyrosine phosphatase; mitochondrial 1                                | -0.8363 | 0      |

|             |           |                                                                                                                                                                              |         |        |
|-------------|-----------|------------------------------------------------------------------------------------------------------------------------------------------------------------------------------|---------|--------|
| 229537_at   |           | Transcribed locus; strongly similar to XP_513538.1 similar to LIM domain transcription factor LMO4 (LIM-only protein 4) (LMO-4) (Breast tumor autoantigen) [Pan troglodytes] | -0.1624 | 0.0197 |
| 229541_at   |           |                                                                                                                                                                              | -0.274  | 0.0315 |
| 229542_at   | C20orf85  | chromosome 20 open reading frame 85                                                                                                                                          | -0.1302 | 0.0042 |
| 229544_at   |           | CDNA clone IMAGE:4791887, MRNA; cDNA DKFZp564C0762 (from clone DKFZp564C0762)                                                                                                | -0.8384 | 0.0299 |
| 229554_at   |           | Transcribed locus                                                                                                                                                            | -3.7384 | 0      |
| 229563_s_at | RPL10A    | ribosomal protein L10a                                                                                                                                                       | -0.1685 | 0.0108 |
| 229565_x_at | TBX3      | T-box 3 (ulnar mammary syndrome)                                                                                                                                             | -0.1924 | 0.0372 |
| 229580_at   |           | Transcribed locus                                                                                                                                                            | -0.7892 | 0.0243 |
| 229582_at   | C18orf37  | chromosome 18 open reading frame 37                                                                                                                                          | -0.6797 | 0.0029 |
| 229594_at   | SPTY2D1   | SPT2; Suppressor of Ty; domain containing 1 (S. cerevisiae)                                                                                                                  | -0.7735 | 0.0001 |
| 229596_at   | AMDHD1    | amidohydrolase domain containing 1                                                                                                                                           | -4.0841 | 0      |
| 229598_at   | COBLL1    | COBL-like 1                                                                                                                                                                  | -1.809  | 0      |
| 229604_at   | CMAH      | cytidine monophosphate-N-acetylneuraminic acid hydroxylase (CMP-N-acetylneuraminic acid monooxygenase)                                                                       | -0.3628 | 0.0013 |
| 229619_at   | FOLR2     | Folate receptor 2 (fetal)                                                                                                                                                    | -0.2665 | 0.0041 |
| 229620_at   | SEPP1     | selenoprotein P; plasma; 1                                                                                                                                                   | -0.9707 | 0.0004 |
| 229623_at   | FLJ12993  | Hypothetical LOC441027                                                                                                                                                       | -2.2476 | 0.0001 |
| 229624_at   |           | Transcribed locus                                                                                                                                                            | -0.4272 | 0.0012 |
| 229630_s_at | WTAP      | Wilms tumor 1 associated protein                                                                                                                                             | -0.4075 | 0.0142 |
| 229634_at   | TMEM139   | transmembrane protein 139                                                                                                                                                    | -0.2906 | 0.0016 |
| 229638_at   | IRX3      | iroquois homeobox 3                                                                                                                                                          | -2.2334 | 0.0001 |
| 229639_s_at | SLC19A1   | Solute carrier family 19 (folate transporter); member 1                                                                                                                      | -0.1616 | 0.0258 |
| 229640_x_at |           | CDNA FLJ26856 fis; clone PRS08123                                                                                                                                            | -0.6819 | 0.0016 |
| 229641_at   |           | Transcribed locus                                                                                                                                                            | -1.9234 | 0.0257 |
| 229647_at   |           |                                                                                                                                                                              | -0.7205 | 0.0238 |
| 229652_s_at | LOC400236 | hypothetical LOC400236                                                                                                                                                       | -0.1004 | 0.0156 |
| 229657_at   | THRB      | thyroid hormone receptor; beta (erythroblastic leukemia viral (v-erb-a) oncogene homolog 2; avian)                                                                           | -1.7914 | 0      |
| 229668_at   | LOC90393  | hypothetical protein LOC90393                                                                                                                                                | -1.0753 | 0      |
| 229670_at   |           | 5.5 kb mRNA upregulated in retinoic acid treated HL-60 neutrophilic cells                                                                                                    | -1.1484 | 0      |
| 229678_at   | LOC728431 | Hypothetical protein LOC728431                                                                                                                                               | -1.2851 | 0.0001 |
| 229683_s_at | KCTD15    | Potassium channel tetramerisation domain containing 15                                                                                                                       | -0.1759 | 0.0021 |
| 229687_s_at |           | Full length insert cDNA clone ZD53C10                                                                                                                                        | -0.3176 | 0.0049 |
| 229688_at   |           | Full length insert cDNA clone ZD53C10                                                                                                                                        | -0.1937 | 0.0161 |

|             |           |                                                                                                                                                                                                             |         |        |
|-------------|-----------|-------------------------------------------------------------------------------------------------------------------------------------------------------------------------------------------------------------|---------|--------|
| 229689_s_at |           | Transcribed locus                                                                                                                                                                                           | -0.7151 | 0.0004 |
| 229691_at   |           | Full-length cDNA clone CS0DH005Y118 of T cells (Jurkat cell line) of Homo sapiens (human)                                                                                                                   | -0.2728 | 0.0336 |
| 229693_at   | LOC388335 | similar to RIKEN cDNA A730055C05 gene                                                                                                                                                                       | -2.0313 | 0      |
| 229696_at   |           | Transcribed locus                                                                                                                                                                                           | -0.5699 | 0      |
| 229699_at   |           | CDNA FLJ45384 fis; clone BRHIP3021987                                                                                                                                                                       | -1.44   | 0      |
| 229708_at   | C9orf167  | Chromosome 9 open reading frame 167                                                                                                                                                                         | -0.122  | 0.0494 |
| 229709_at   | ATP1B3    | ATPase; Na <sup>+</sup> /K <sup>+</sup> transporting; beta 3 polypeptide                                                                                                                                    | -0.7907 | 0      |
| 229727_x_at | NLF2      | nuclear localized factor 2                                                                                                                                                                                  | -0.1925 | 0.0402 |
| 229739_s_at | FAM116B   | family with sequence similarity 116; member B                                                                                                                                                               | -0.3769 | 0.0047 |
| 229740_at   | LOC643008 | PP12104                                                                                                                                                                                                     | -0.1994 | 0.0043 |
| 229753_at   |           |                                                                                                                                                                                                             | -0.1024 | 0.0357 |
| 229755_x_at | DLL3      | Delta-like 3 (Drosophila)                                                                                                                                                                                   | -0.1602 | 0.0335 |
| 229756_at   |           | Transcribed locus; strongly similar to XP_515285.1 similar to inhibitor of DNA binding 2; inhibitor of differentiation 2; DNA-binding protein inhibitor ID2; helix-loop-helix protein ID2 [Pan troglodytes] | -0.7633 | 0.0006 |
| 229757_at   |           | Transcribed locus                                                                                                                                                                                           | -0.4496 | 0.0448 |
| 229771_at   | TMEM41A   | Transmembrane protein 41A                                                                                                                                                                                   | -0.542  | 0      |
| 229779_at   | COL4A4    | collagen; type IV; alpha 4                                                                                                                                                                                  | -4.162  | 0      |
| 229780_at   | MTSS1     | Metastasis suppressor 1                                                                                                                                                                                     | -0.1996 | 0.0328 |
| 229783_at   | LOC728163 | hypothetical protein LOC728163                                                                                                                                                                              | -0.1285 | 0.0457 |
| 229786_at   |           | CDNA clone IMAGE:4819555                                                                                                                                                                                    | -0.5048 | 0      |
| 229797_at   | MCOLN3    | mucolipin 3                                                                                                                                                                                                 | -2.4965 | 0.0048 |
| 229799_s_at | NCAM1     | neural cell adhesion molecule 1                                                                                                                                                                             | -0.2043 | 0.0004 |
| 229802_at   |           | CDNA FLJ14388 fis; clone HEMBA1002716                                                                                                                                                                       | -2.8194 | 0.0006 |
| 229806_at   | QRICH1    | Glutamine-rich 1                                                                                                                                                                                            | -0.2821 | 0      |
| 229807_s_at | MAZ       | MYC-associated zinc finger protein (purine-binding transcription factor)                                                                                                                                    | -0.1443 | 0.0065 |
| 229810_at   |           | Transcribed locus                                                                                                                                                                                           | -0.6057 | 0.0298 |
| 229812_at   | USP48     | ubiquitin specific peptidase 48                                                                                                                                                                             | -2.2319 | 0      |
| 229813_x_at | DAZAP1    | DAZ associated protein 1                                                                                                                                                                                    | -0.5892 | 0.0002 |
| 229820_at   | LOC440993 | hypothetical gene supported by AK128346                                                                                                                                                                     | -0.2571 | 0.0197 |
| 229823_at   |           | Transcribed locus                                                                                                                                                                                           | -1.6255 | 0.0144 |
| 229824_at   |           | CDNA FLJ45325 fis; clone BRHIP3006717                                                                                                                                                                       | -3.0076 | 0      |
| 229825_at   | PLK3      | Polo-like kinase 3 (Drosophila)                                                                                                                                                                             | -0.1275 | 0.008  |
| 229826_at   | LOC440957 | similar to CG32736-PA                                                                                                                                                                                       | -0.9638 | 0.0413 |
| 229827_at   | BUB3      | BUB3 budding uninhibited by benzimidazoles 3 homolog (yeast)                                                                                                                                                | -0.1708 | 0.004  |
| 229833_at   |           | CDNA FLJ90099 fis; clone HEMBA1006016                                                                                                                                                                       | -0.2857 | 0.0452 |

|             |           |                                                                                                                                          |         |        |
|-------------|-----------|------------------------------------------------------------------------------------------------------------------------------------------|---------|--------|
| 229840_at   | IQSEC2    | IQ motif and Sec7 domain 2                                                                                                               | -0.5658 | 0.0041 |
| 229848_at   | ZNF10     | zinc finger protein 10                                                                                                                   | -0.9595 | 0.0032 |
| 229851_s_at | C11orf54  | chromosome 11 open reading frame 54                                                                                                      | -1.2672 | 0      |
| 229856_s_at | C1orf128  | Chromosome 1 open reading frame 128                                                                                                      | -0.1384 | 0.0135 |
| 229857_s_at | LOC644246 | Hypothetical protein LOC644246                                                                                                           | -0.15   | 0.0239 |
| 229865_at   | FNDC3B    | fibronectin type III domain containing 3B                                                                                                | -0.5604 | 0.016  |
| 229867_at   | BTBD9     | BTB (POZ) domain containing 9                                                                                                            | -0.4527 | 0.0041 |
| 229874_x_at | LOC729604 | hypothetical protein LOC729604                                                                                                           | -0.6787 | 0.0391 |
| 229884_s_at | MRPL2     | mitochondrial ribosomal protein L2                                                                                                       | -0.7163 | 0.0255 |
| 229885_at   |           | Transcribed locus                                                                                                                        | -0.7463 | 0.0023 |
| 229888_at   | C12orf60  | chromosome 12 open reading frame 60                                                                                                      | -2.5925 | 0      |
| 229893_at   | FRMD3     | FERM domain containing 3                                                                                                                 | -1.7843 | 0      |
| 229894_s_at | RAB43     | RAB43; member RAS oncogene family                                                                                                        | -0.2375 | 0.0122 |
| 229898_at   |           | Transcribed locus                                                                                                                        | -0.6556 | 0.0001 |
| 229902_at   | FLT4      | fms-related tyrosine kinase 4                                                                                                            | -0.4835 | 0.009  |
| 229904_at   |           | Homo sapiens; clone IMAGE:4186245; mRNA                                                                                                  | -0.1282 | 0.024  |
| 229907_at   |           | Homo sapiens; clone IMAGE:6176018; mRNA                                                                                                  | -0.5188 | 0.0033 |
| 229910_at   | SHE       | Src homology 2 domain containing E                                                                                                       | -2.1525 | 0      |
| 229922_at   | GPRIN1    | G protein regulated inducer of neurite outgrowth 1                                                                                       | -0.1847 | 0.0389 |
| 229923_at   | ZDHHC21   | zinc finger; DHHC-type containing 21                                                                                                     | -0.151  | 0.0498 |
| 229928_at   |           |                                                                                                                                          | -0.2057 | 0.0335 |
| 229931_at   | ZNF775    | Zinc finger protein 775                                                                                                                  | -0.1072 | 0.0481 |
| 229932_at   | RNF181    | Ring finger protein 181                                                                                                                  | -0.3094 | 0.0083 |
| 229934_at   |           | Mir-223 transcript variant 1 mRNA; complete sequence                                                                                     | -0.5013 | 0.0074 |
| 229936_at   | GFRA3     | GDNF family receptor alpha 3                                                                                                             | -0.3209 | 0.0028 |
| 229940_at   | SETD3     | SET domain containing 3                                                                                                                  | -0.544  | 0      |
| 229941_at   | LOC730112 | similar to CG18335-PA                                                                                                                    | -2.1321 | 0.0125 |
| 229942_at   | BNC2      | basonuclin 2                                                                                                                             | -0.3728 | 0.0315 |
| 229948_at   |           | Transcribed locus; strongly similar to XP_001092008.1 similar to family with sequence similarity 98; member B isoform 1 [Macaca mulatta] | -1.5558 | 0      |
| 229950_s_at |           |                                                                                                                                          | -0.1388 | 0.0194 |
| 229954_at   |           | Transcribed locus; strongly similar to XP_001082768.1 similar to choline dehydrogenase [Macaca mulatta]                                  | -0.6322 | 0      |
| 229969_at   | SEC63     | SEC63 homolog (S. cerevisiae)                                                                                                            | -1.069  | 0.0002 |
| 229973_at   | C1orf173  | chromosome 1 open reading frame 173                                                                                                      | -1.0325 | 0      |

|             |           |                                                                                                                                                    |         |        |
|-------------|-----------|----------------------------------------------------------------------------------------------------------------------------------------------------|---------|--------|
| 229974_at   | EVC2      | Ellis van Creveld syndrome 2 (limbin)                                                                                                              | -0.3317 | 0.0003 |
| 229991_s_at | SYTL4     | Synaptotagmin-like 4 (granuphilin-a)                                                                                                               | -0.6874 | 0      |
| 229996_s_at | PCGF5     | Polycomb group ring finger 5                                                                                                                       | -0.1907 | 0.0039 |
| 230009_at   | FAM118B   | family with sequence similarity 118; member B                                                                                                      | -0.693  | 0.0015 |
| 230023_at   | NSUN4     | NOL1/NOP2/Sun domain family; member 4                                                                                                              | -0.5545 | 0.0488 |
| 230025_at   | GJC1      | gap junction protein; chi 1; 31.9kDa                                                                                                               | -0.3935 | 0.0009 |
| 230030_at   | HS6ST2    | heparan sulfate 6-O-sulfotransferase 2                                                                                                             | -0.3959 | 0.0062 |
| 230031_at   | HSPA5     | heat shock 70kDa protein 5 (glucose-regulated protein; 78kDa)                                                                                      | -1.4404 | 0.0003 |
| 230041_at   |           | CDNA FLJ14057 fis; clone HEMBB1000337                                                                                                              | -0.1837 | 0.0405 |
| 230045_at   | CNTN2     | contactin 2 (axonal)                                                                                                                               | -0.1156 | 0.0242 |
| 230048_at   |           | Transcribed locus                                                                                                                                  | -0.9536 | 0.0004 |
| 230051_at   | C10orf47  | chromosome 10 open reading frame 47                                                                                                                | -0.258  | 0.002  |
| 230054_at   | PRRT1     | Proline-rich transmembrane protein 1                                                                                                               | -0.3527 | 0.0258 |
| 230067_at   | FAM124A   | Family with sequence similarity 124A                                                                                                               | -0.2265 | 0.0378 |
| 230080_at   | HOXA4     | Homeobox A4                                                                                                                                        | -0.3441 | 0.0001 |
| 230081_at   | PLCXD3    | phosphatidylinositol-specific phospholipase C; X domain containing 3                                                                               | -3.1341 | 0.0001 |
| 230083_at   | USP53     | ubiquitin specific peptidase 53                                                                                                                    | -3.2019 | 0      |
| 230087_at   | PRIMA1    | proline rich membrane anchor 1                                                                                                                     | -0.8992 | 0      |
| 230110_at   | MCOLN2    | mucolipin 2                                                                                                                                        | -1.8812 | 0.0003 |
| 230117_at   | VSTM2A    | V-set and transmembrane domain containing 2A                                                                                                       | -0.2927 | 0.0008 |
| 230130_at   | SLIT2     | Slit homolog 2 (Drosophila)                                                                                                                        | -3.5994 | 0.0003 |
| 230131_x_at | ARSD      | arylsulfatase D                                                                                                                                    | -0.6957 | 0.0007 |
| 230135_at   |           | Homo sapiens; clone IMAGE:4690669; mRNA                                                                                                            | -2.2822 | 0.0001 |
| 230138_at   | FREQ      | Frequenin homolog (Drosophila)                                                                                                                     | -0.1677 | 0.0092 |
| 230140_at   | PTPN9     | Protein tyrosine phosphatase; non-receptor type 9                                                                                                  | -0.1028 | 0.0064 |
| 230154_at   |           | Transcribed locus; strongly similar to XP_001106227.1 similar to WW domain-containing adapter with a coiled-coil region isoform 1 [Macaca mulatta] | -0.3756 | 0.0132 |
| 230156_x_at | CHD2      | Chromodomain helicase DNA binding protein 2                                                                                                        | -0.2327 | 0.0415 |
| 230159_at   |           |                                                                                                                                                    | -0.1432 | 0.0229 |
| 230163_at   | LOC143381 | Hypothetical protein LOC143381                                                                                                                     | -0.2545 | 0      |
| 230166_at   | KIAA1958  | KIAA1958                                                                                                                                           | -0.8736 | 0.0071 |
| 230172_at   | FAM14B    | Family with sequence similarity 14; member B                                                                                                       | -1.0377 | 0.0007 |
| 230176_at   |           | Transcribed locus                                                                                                                                  | -0.5306 | 0.0071 |
| 230178_s_at |           | CDNA FLJ38461 fis; clone FEBRA2020977                                                                                                              | -1.3763 | 0      |

|             |          |                                                                                                                                         |         |        |
|-------------|----------|-----------------------------------------------------------------------------------------------------------------------------------------|---------|--------|
| 230184_at   |          | CDNA FLJ39179 fis; clone OCBBF2004147                                                                                                   | -0.1761 | 0.0102 |
| 230188_at   | ICHTHYIN | ichthyin protein                                                                                                                        | -0.2561 | 0.0044 |
| 230189_x_at |          | Transcribed locus                                                                                                                       | -0.1742 | 0.037  |
| 230190_at   | NDFIP2   | Nedd4 family interacting protein 2                                                                                                      | -0.1013 | 0.0093 |
| 230192_at   | TRIM13   | tripartite motif-containing 13                                                                                                          | -0.5824 | 0.0478 |
| 230195_at   |          | Hypothetical protein (ORF1); clone 00275                                                                                                | -0.155  | 0.0018 |
| 230196_x_at | ARHGAP23 | Rho GTPase activating protein 23                                                                                                        | -0.2125 | 0.036  |
| 230197_s_at | TPPP     | Tubulin polymerization promoting protein                                                                                                | -0.1277 | 0.0407 |
| 230202_at   | RELA     | V-rel reticuloendotheliosis viral oncogene homolog A; nuclear factor of kappa light polypeptide gene enhancer in B-cells 3; p65 (avian) | -0.2543 | 0.0049 |
| 230203_at   | FLJ46875 | hypothetical LOC440918                                                                                                                  | -0.4135 | 0.034  |
| 230216_at   | C12orf51 | Chromosome 12 open reading frame 51                                                                                                     | -0.2122 | 0.0018 |
| 230218_at   | HIC1     | hypermethylated in cancer 1                                                                                                             | -1.103  | 0      |
| 230231_at   | FGF14    | fibroblast growth factor 14                                                                                                             | -0.2368 | 0.0008 |
| 230233_at   |          | Transcribed locus                                                                                                                       | -2.0995 | 0.0001 |
| 230234_at   |          | Transcribed locus                                                                                                                       | -0.2253 | 0.0467 |
| 230239_at   | ROCK1    | Rho-associated; coiled-coil containing protein kinase 1                                                                                 | -0.3077 | 0.0085 |
| 230241_at   |          | Transcribed locus                                                                                                                       | -1.2497 | 0.0015 |
| 230247_at   |          | Transcribed locus                                                                                                                       | -0.1953 | 0.0413 |
| 230250_at   | PTPRB    | Protein tyrosine phosphatase; receptor type; B                                                                                          | -3.299  | 0      |
| 230251_at   | C6orf176 | Chromosome 6 open reading frame 176                                                                                                     | -5.9406 | 0      |
| 230252_at   | GPR92    | G protein-coupled receptor 92                                                                                                           | -1.0815 | 0      |
| 230253_at   | SCUBE3   | Signal peptide; CUB domain; EGF-like 3                                                                                                  | -0.2024 | 0.0248 |
| 230260_s_at |          |                                                                                                                                         | -0.1156 | 0.0036 |
| 230262_at   | ST8SIA3  | ST8 alpha-N-acetyl-neuraminide alpha-2,8-sialyltransferase 3                                                                            | -0.3008 | 0.0063 |
| 230268_at   |          | Transcribed locus                                                                                                                       | -0.453  | 0      |
| 230269_at   |          | Transcribed locus                                                                                                                       | -0.1436 | 0.0129 |
| 230274_s_at | NUP88    | Nucleoporin 88kDa                                                                                                                       | -0.3308 | 0.0012 |
| 230276_at   |          |                                                                                                                                         | -0.7761 | 0.0011 |
| 230279_at   |          | CDNA FLJ37891 fis; clone BRTHA2003436                                                                                                   | -0.214  | 0.0273 |
| 230288_at   | FGF14    | fibroblast growth factor 14                                                                                                             | -0.3991 | 0.0005 |
| 230290_at   | SCUBE3   | signal peptide; CUB domain; EGF-like 3                                                                                                  | -0.4739 | 0      |
| 230296_at   | C16orf52 | Chromosome 16 open reading frame 52                                                                                                     | -0.5565 | 0.0049 |
| 230303_at   | SYNPR    | synaptopodin                                                                                                                            | -0.1189 | 0.0346 |
| 230305_at   |          | Transcribed locus                                                                                                                       | -2.3985 | 0      |
| 230309_at   |          | Transcribed locus                                                                                                                       | -1.8957 | 0.0007 |
| 230317_x_at | TMCO3    | Transmembrane and coiled-coil domains 3                                                                                                 | -0.131  | 0.0064 |

|             |           |                                                                                                                                                        |         |        |
|-------------|-----------|--------------------------------------------------------------------------------------------------------------------------------------------------------|---------|--------|
| 230320_at   | TBRG1     | transforming growth factor beta regulator 1                                                                                                            | -0.4726 | 0.033  |
| 230321_at   |           |                                                                                                                                                        | -0.3508 | 0.0359 |
| 230322_at   | NFAM1     | NFAT activating protein with ITAM motif 1                                                                                                              | -0.3417 | 0.0013 |
| 230326_s_at | C11orf73  | chromosome 11 open reading frame 73                                                                                                                    | -0.3711 | 0.045  |
| 230333_at   |           | Transcribed locus                                                                                                                                      | -0.8551 | 0.046  |
| 230335_at   | C9orf50   | chromosome 9 open reading frame 50                                                                                                                     | -0.1881 | 0.0025 |
| 230349_at   | XKRX      | XK; Kell blood group complex subunit-related; X-linked                                                                                                 | -0.2208 | 0.0136 |
| 230351_at   | LOC283481 | hypothetical protein LOC283481                                                                                                                         | -1.4455 | 0      |
| 230352_at   | PRPS2     | Phosphoribosyl pyrophosphate synthetase 2                                                                                                              | -2.9322 | 0      |
| 230353_at   | LOC284112 | hypothetical protein LOC284112                                                                                                                         | -1.4796 | 0      |
| 230354_at   |           | Transcribed locus                                                                                                                                      | -0.4775 | 0      |
| 230358_at   | ZER1      | Zer-1 homolog (C. elegans)                                                                                                                             | -0.1483 | 0.0086 |
| 230360_at   | GLDN      | gliomedin                                                                                                                                              | -1.6785 | 0.0039 |
| 230364_at   | CHPT1     | choline phosphotransferase 1                                                                                                                           | -1.0659 | 0.002  |
| 230371_at   | HPS6      | Hermansky-Pudlak syndrome 6                                                                                                                            | -0.1875 | 0.0071 |
| 230377_s_at | TBC1D2B   | TBC1 domain family; member 2B                                                                                                                          | -0.1178 | 0.0285 |
| 230378_at   | SCGB3A1   | secretoglobin; family 3A; member 1                                                                                                                     | -0.1988 | 0.0216 |
| 230379_x_at | C2orf56   | chromosome 2 open reading frame 56                                                                                                                     | -0.7836 | 0.0021 |
| 230380_at   | THAP2     | THAP domain containing; apoptosis associated protein 2                                                                                                 | -4.8926 | 0      |
| 230385_at   | LOC153277 | hypothetical protein LOC153277                                                                                                                         | -0.3251 | 0.0045 |
| 230388_s_at | LOC644246 | hypothetical protein LOC644246                                                                                                                         | -2.8717 | 0      |
| 230391_at   | CD84      | CD84 molecule                                                                                                                                          | -1.2995 | 0.0097 |
| 230410_at   | NRP2      | Neuropilin 2                                                                                                                                           | -0.1193 | 0.0286 |
| 230416_at   |           | Transcribed locus                                                                                                                                      | -1.1128 | 0.006  |
| 230422_at   | FPRL2     | formyl peptide receptor-like 2                                                                                                                         | -1.4555 | 0.0021 |
| 230433_at   | LOC729970 | hypothetical protein LOC729970                                                                                                                         | -1.1994 | 0.0209 |
| 230435_at   | LOC375190 | hypothetical LOC375190                                                                                                                                 | -0.6501 | 0.0091 |
| 230443_at   | NHP2L1    | NHP2 non-histone chromosome protein 2-like 1 (S. cerevisiae)                                                                                           | -0.1849 | 0.0243 |
| 230449_x_at |           | Transcribed locus; weakly similar to XP_519878.1 similar to ubiquitin-conjugating enzyme E2 variant 1 isoform c; DNA-binding protein [Pan troglodytes] | -0.9139 | 0.012  |
| 230455_at   | PPP1R9B   | protein phosphatase 1; regulatory (inhibitor) subunit 9B                                                                                               | -0.149  | 0.0482 |
| 230459_s_at | SHB       | Src homology 2 domain containing adaptor protein B                                                                                                     | -0.1319 | 0.0088 |
| 230463_at   |           | CDNA FLJ36891 fis; clone BRACE2000368                                                                                                                  | -0.7755 | 0      |
| 230467_at   | TMEM52    | transmembrane protein 52                                                                                                                               | -1.2294 | 0.0358 |
| 230468_s_at | C1orf56   | Chromosome 1 open reading frame 56                                                                                                                     | -0.1802 | 0.0019 |
| 230470_at   | DSCR9     | Down syndrome critical region gene 9                                                                                                                   | -0.166  | 0.0112 |



|             |            |                                                                                                               |         |        |
|-------------|------------|---------------------------------------------------------------------------------------------------------------|---------|--------|
| 230473_s_at | HMGB4      | high-mobility group box 4                                                                                     | -0.1598 | 0.0488 |
| 230479_at   |            | Transcribed locus                                                                                             | -0.8194 | 0.0019 |
| 230482_at   | ST6GALNAC5 | ST6 (alpha-N-acetyl-neuraminyl-2;3-beta-galactosyl-1;3)-N-acetylgalactosaminide alpha-2,6-sialyltransferase 5 | -1.8006 | 0      |
| 230488_s_at | LOC138948  | BPR                                                                                                           | -0.3024 | 0.0007 |
| 230491_at   |            | MRNA; cDNA DKFZp686J01116 (from clone DKFZp686J01116)                                                         | -0.6689 | 0.0336 |
| 230502_s_at | LOC149832  | Hypothetical protein LOC149832                                                                                | -0.2861 | 0.038  |
| 230510_at   | HSPB9      | heat shock protein; alpha-crystallin-related; B9                                                              | -0.1469 | 0.0101 |
| 230511_at   | CREM       | cAMP responsive element modulator                                                                             | -3.7468 | 0      |
| 230512_x_at | TMEM165    | Transmembrane protein 165                                                                                     | -0.1651 | 0.0234 |
| 230514_s_at | LYZL1      | lysozyme-like 1, lysozyme-like 2                                                                              | -0.127  | 0.0172 |
| 230515_at   |            |                                                                                                               | -0.1252 | 0.0119 |
| 230517_at   | tcag7.1196 | similar to GLI-Kruppel family member HKR1                                                                     | -0.1251 | 0.0276 |
| 230519_at   | FAM124A    | family with sequence similarity 124A                                                                          | -0.2134 | 0.0212 |
| 230520_at   | AIG1       | androgen-induced 1                                                                                            | -0.241  | 0.0114 |
| 230523_at   | QSOX1      | quiescin Q6 sulfhydryl oxidase 1                                                                              | -0.2281 | 0.0005 |
| 230529_at   | HECA       | headcase homolog (Drosophila)                                                                                 | -0.2355 | 0.0093 |
| 230530_at   |            |                                                                                                               | -0.2265 | 0.0107 |
| 230544_at   | RPS6KA4    | Ribosomal protein S6 kinase; 90kDa; polypeptide 4                                                             | -0.1986 | 0.0071 |
| 230549_at   | ELK4       | ELK4; ETS-domain protein (SRF accessory protein 1)                                                            | -0.1114 | 0.0493 |
| 230550_at   | MS4A6A     | membrane-spanning 4-domains; subfamily A; member 6A                                                           | -2.4545 | 0      |
| 230553_at   |            |                                                                                                               | -0.1663 | 0.005  |
| 230563_at   | RASGEF1A   | RasGEF domain family; member 1A                                                                               | -1.1729 | 0.0355 |
| 230564_at   | SIPA1L3    | Signal-induced proliferation-associated 1 like 3                                                              | -0.1561 | 0.0035 |
| 230572_at   | C4orf38    | chromosome 4 open reading frame 38                                                                            | -0.1022 | 0.0414 |
| 230574_at   |            |                                                                                                               | -0.2172 | 0.0148 |
| 230577_at   |            | Transcribed locus                                                                                             | -0.9512 | 0.0083 |
| 230589_at   |            |                                                                                                               | -0.1212 | 0.0381 |
| 230595_at   | LOC572558  | hypothetical locus LOC572558                                                                                  | -3.2003 | 0      |
| 230608_at   | C1orf182   | chromosome 1 open reading frame 182                                                                           | -0.2025 | 0.03   |
| 230611_at   | SYPL2      | synaptophysin-like 2                                                                                          | -0.8192 | 0.0082 |
| 230619_at   | ARNT       | aryl hydrocarbon receptor nuclear translocator                                                                | -0.7561 | 0.0019 |
| 230631_s_at |            | Full-length cDNA clone CS0DI051YA02 of Placenta Cot 25-normalized of Homo sapiens (human)                     | -0.1489 | 0.0429 |
| 230633_at   | TMEM102    | transmembrane protein 102                                                                                     | -0.4377 | 0      |
| 230642_at   |            | Transcribed locus                                                                                             | -0.2243 | 0.0041 |

|             |           |                                                                                                        |         |        |
|-------------|-----------|--------------------------------------------------------------------------------------------------------|---------|--------|
| 230643_at   | WNT9A     | wingless-type MMTV integration site family; member 9A                                                  | -0.5437 | 0.0004 |
| 230644_at   | LRFN5     | leucine rich repeat and fibronectin type III domain containing 5                                       | -1.2586 | 0      |
| 230645_at   | FRMD3     | FERM domain containing 3                                                                               | -2.344  | 0.0001 |
| 230648_at   | LOC283663 | hypothetical protein LOC283663                                                                         | -0.1609 | 0.0183 |
| 230657_at   |           | Transcribed locus                                                                                      | -1.7422 | 0      |
| 230658_at   | SLC7A2    | solute carrier family 7 (cationic amino acid transporter; y+ system); member 2                         | -0.1175 | 0.0062 |
| 230665_at   |           | CDNA FLJ40823 fis; clone TRACH2011093                                                                  | -0.2714 | 0.0095 |
| 230670_at   | IGSF10    | immunoglobulin superfamily; member 10                                                                  | -2.8156 | 0      |
| 230673_at   | PKHD1L1   | polycystic kidney and hepatic disease 1 (autosomal recessive)-like 1                                   | -0.3513 | 0      |
| 230677_at   | C14orf73  | chromosome 14 open reading frame 73                                                                    | -0.1594 | 0.0212 |
| 230680_at   |           | Transcribed locus                                                                                      | -2.4973 | 0.0003 |
| 230691_at   | STX1B     | syntaxin 1B                                                                                            | -0.1828 | 0.0027 |
| 230699_at   | PGLS      | 6-phosphogluconolactonase                                                                              | -0.2518 | 0.0036 |
| 230700_at   | RTN4RL1   | reticulon 4 receptor-like 1                                                                            | -0.4492 | 0.0024 |
| 230706_s_at | CAMK2N2   | calcium/calmodulin-dependent protein kinase II inhibitor 2                                             | -1.9648 | 0      |
| 230709_x_at | ZBTB7A    | Zinc finger and BTB domain containing 7A                                                               | -0.2337 | 0.0042 |
| 230711_at   |           | CDNA FLJ13510 fis; clone PLACE1005146                                                                  | -0.2137 | 0.0244 |
| 230715_at   | KIAA1729  | KIAA1729 protein                                                                                       | -0.4554 | 0.0202 |
| 230716_at   | LOC285733 | hypothetical protein LOC285733                                                                         | -0.252  | 0      |
| 230721_at   | C16orf52  | chromosome 16 open reading frame 52                                                                    | -0.7782 | 0      |
| 230727_at   | CISD3     | CDGSH iron sulfur domain 3                                                                             | -0.5517 | 0.0026 |
| 230729_at   |           | Transcribed locus; strongly similar to XP_001115485.1 similar to exportin 1 isoform 1 [Macaca mulatta] | -0.5217 | 0.0027 |
| 230740_at   |           |                                                                                                        | -0.9449 | 0      |
| 230743_at   | LOC404266 | hypothetical LOC404266                                                                                 | -0.182  | 0.0298 |
| 230744_at   |           | Transcribed locus                                                                                      | -1.3862 | 0      |
| 230747_s_at | C18orf17  | Chromosome 18 open reading frame 17                                                                    | -2.3112 | 0      |
| 230749_s_at | CAMK2D    | calcium/calmodulin-dependent protein kinase (CaM kinase) II delta                                      | -0.1579 | 0.0167 |
| 230750_at   |           | Transcribed locus                                                                                      | -0.2253 | 0.0033 |
| 230754_at   | ZBTB38    | zinc finger and BTB domain containing 38                                                               | -0.3947 | 0      |
| 230760_at   | ZFY       | Zinc finger protein; Y-linked                                                                          | -0.8594 | 0.0182 |
| 230769_at   | DENND2C   | DENN/MADD domain containing 2C                                                                         | -0.2011 | 0.0292 |
| 230774_at   | ZADH1     | zinc binding alcohol dehydrogenase; domain containing 1                                                | -0.658  | 0.0067 |
| 230776_at   |           | CDNA FLJ36181 fis; clone TESTI2026794                                                                  | -0.1201 | 0.0232 |

|             |           |                                                                                     |         |        |
|-------------|-----------|-------------------------------------------------------------------------------------|---------|--------|
| 230780_at   | LOC730091 | hypothetical protein LOC730091                                                      | -0.4562 | 0.0224 |
| 230781_at   |           |                                                                                     | -1.4537 | 0.0047 |
| 230782_at   | LOC653381 | similar to Sorbitol dehydrogenase (L-idoitol 2-dehydrogenase)                       | -0.9856 | 0.0052 |
| 230788_at   | GCNT2     | glucosaminyl (N-acetyl) transferase 2; I-branching enzyme (I blood group)           | -0.1737 | 0.038  |
| 230790_x_at |           |                                                                                     | -0.4959 | 0.0124 |
| 230810_at   | JMJD4     | jumonji domain containing 4                                                         | -0.2634 | 0.0007 |
| 230816_at   | C9orf166  | Chromosome 9 open reading frame 166                                                 | -0.2365 | 0.0001 |
| 230822_at   | TMEM61    | transmembrane protein 61                                                            | -0.8745 | 0      |
| 230831_at   |           |                                                                                     | -2.1984 | 0.0032 |
| 230833_at   | ACRBP     | acrosin binding protein                                                             | -0.2233 | 0.0244 |
| 230839_at   | PRMT8     | protein arginine methyltransferase 8                                                | -0.1611 | 0.0073 |
| 230863_at   | LRP2      | low density lipoprotein-related protein 2                                           | -0.1548 | 0.0356 |
| 230870_at   | MUS81     | MUS81 endonuclease homolog (S. cerevisiae)                                          | -0.1467 | 0.0064 |
| 230871_at   | DHX30     | DEAH (Asp-Glu-Ala-His) box polypeptide 30                                           | -0.7833 | 0.0198 |
| 230875_s_at | ATP11A    | ATPase; Class VI; type 11A                                                          | -1.1607 | 0.0026 |
| 230877_at   | IGHD      | immunoglobulin heavy constant delta                                                 | -0.1388 | 0.0244 |
| 230894_s_at |           | Transcribed locus                                                                   | -0.973  | 0.0007 |
| 230899_at   | SETD4     | SET domain containing 4                                                             | -0.1762 | 0.006  |
| 230911_at   | SIX1      | SIX homeobox 1                                                                      | -0.1226 | 0.0294 |
| 230913_at   |           | Full length insert cDNA clone ZE12B03                                               | -1.5595 | 0.0074 |
| 230921_s_at |           | Transcribed locus                                                                   | -0.24   | 0.029  |
| 230922_x_at | FUNDC2    | FUN14 domain containing 2                                                           | -0.3506 | 0.0193 |
| 230923_at   | FAM19A1   | family with sequence similarity 19 (chemokine (C-C motif)-like); member A1          | -0.1238 | 0.0397 |
| 230924_at   | TTLL6     | tubulin tyrosine ligase-like family; member 6                                       | -0.1391 | 0.0378 |
| 230925_at   | APBB1IP   | amyloid beta (A4) precursor protein-binding; family B; member 1 interacting protein | -1.2924 | 0.0052 |
| 230938_x_at | ATF5      | activating transcription factor 5                                                   | -0.202  | 0.029  |
| 230939_at   |           |                                                                                     | -0.1778 | 0.0224 |
| 230950_at   |           | Transcribed locus                                                                   | -0.1248 | 0.0333 |
| 230958_s_at |           | Transcribed locus                                                                   | -1.24   | 0.0004 |
| 230963_at   | EMX2OS    | empty spiracles homeobox 2 opposite strand                                          | -0.1681 | 0.0103 |
| 230965_at   | USP2      | ubiquitin specific peptidase 2                                                      | -0.2419 | 0.0347 |
| 230977_at   | NPM2      | nucleophosmin/nucleoplasmin; 2                                                      | -0.8969 | 0      |
| 230979_at   |           | Transcribed locus                                                                   | -0.1299 | 0.0227 |

|             |           |                                                                                                                                            |         |        |
|-------------|-----------|--------------------------------------------------------------------------------------------------------------------------------------------|---------|--------|
| 230980_x_at |           | Transcribed locus; strongly similar to XP_001101257.1 similar to sterol regulatory element-binding transcription factor 2 [Macaca mulatta] | -0.2322 | 0.0306 |
| 230985_at   | C9orf131  | chromosome 9 open reading frame 131                                                                                                        | -0.2281 | 0.0336 |
| 230989_s_at | TSSK6     | testis-specific serine kinase 6                                                                                                            | -0.1666 | 0.0036 |
| 230999_at   | FLJ39051  | Hypothetical gene supported by AK096370                                                                                                    | -1.3053 | 0.002  |
| 231000_at   |           |                                                                                                                                            | -0.1378 | 0.0474 |
| 231001_at   | FIBIN     | fin bud initiation factor                                                                                                                  | -0.4272 | 0.0189 |
| 231002_s_at | RABEP1    | Rabaptin; RAB GTPase binding effector protein 1                                                                                            | -0.4028 | 0.0002 |
| 231011_at   | LARP2     | La ribonucleoprotein domain family; member 2                                                                                               | -0.1995 | 0.0112 |
| 231016_s_at |           | Transcribed locus                                                                                                                          | -0.5292 | 0.0005 |
| 231017_at   | STK11     | serine/threonine kinase 11                                                                                                                 | -0.4684 | 0.0329 |
| 231019_x_at | STK11     | Serine/threonine kinase 11                                                                                                                 | -0.4788 | 0.0001 |
| 231020_at   |           |                                                                                                                                            | -0.1249 | 0.0379 |
| 231033_at   |           | Full length insert cDNA clone Y140A07                                                                                                      | -0.144  | 0.0006 |
| 231035_s_at |           | Transcribed locus                                                                                                                          | -0.4558 | 0.0063 |
| 231045_x_at | C11orf31  | chromosome 11 open reading frame 31                                                                                                        | -0.3936 | 0.0148 |
| 231050_at   | HRASLS5   | HRAS-like suppressor family; member 5                                                                                                      | -0.4069 | 0      |
| 231058_at   | FXYD4     | FXYD domain containing ion transport regulator 4                                                                                           | -0.1172 | 0.0326 |
| 231066_s_at | CLCN4     | Chloride channel 4                                                                                                                         | -0.1524 | 0.0156 |
| 231067_s_at |           | Transcribed locus                                                                                                                          | -0.6081 | 0.0003 |
| 231069_at   |           | Transcribed locus                                                                                                                          | -1.1432 | 0.007  |
| 231072_at   | MIDN      | midnolin                                                                                                                                   | -0.1122 | 0.0494 |
| 231073_at   | C1orf168  | chromosome 1 open reading frame 168                                                                                                        | -0.122  | 0.0409 |
| 231078_at   |           | Transcribed locus; strongly similar to XP_001106001.1 similar to mitochondrial solute carrier-like protein isoform 2 [Macaca mulatta]      | -0.5098 | 0.002  |
| 231083_at   |           |                                                                                                                                            | -0.1558 | 0.0102 |
| 231086_at   |           | Transcribed locus; weakly similar to XP_001094263.1 beta-site APP-cleaving enzyme 1 isoform 5 [Macaca mulatta]                             | -0.4225 | 0.0036 |
| 231091_x_at |           | Transcribed locus                                                                                                                          | -0.1803 | 0.0066 |
| 231097_at   |           | CDNA: FLJ22240 fis; clone HRC02512                                                                                                         | -0.1578 | 0.0139 |
| 231098_at   |           | Transcribed locus                                                                                                                          | -0.3516 | 0.0007 |
| 231110_at   |           | Transcribed locus                                                                                                                          | -0.2819 | 0.0002 |
| 231118_at   | ANKRD35   | ankyrin repeat domain 35                                                                                                                   | -0.3607 | 0.0001 |
| 231121_at   | HPS3      | Hermansky-Pudlak syndrome 3                                                                                                                | -0.2915 | 0.0301 |
| 231132_at   | LOC348120 | Hypothetical protein LOC348120                                                                                                             | -0.166  | 0.0066 |
| 231136_at   |           |                                                                                                                                            | -0.2742 | 0.0035 |

|             |           |                                                                                               |         |        |
|-------------|-----------|-----------------------------------------------------------------------------------------------|---------|--------|
| 231137_at   |           | Transcribed locus                                                                             | -0.2595 | 0.0001 |
| 231140_at   | TPPP2     | tubulin polymerization-promoting protein family member 2                                      | -0.1281 | 0.013  |
| 231141_at   |           | CDNA clone IMAGE:4838568                                                                      | -0.1694 | 0.0087 |
| 231148_at   | IGFL2     | IGF-like family member 2                                                                      | -0.1343 | 0.0233 |
| 231157_at   | TTLL11    | tubulin tyrosine ligase-like family; member 11                                                | -0.7383 | 0.0017 |
| 231159_at   |           |                                                                                               | -0.2003 | 0.0151 |
| 231163_at   | C1orf111  | chromosome 1 open reading frame 111                                                           | -0.148  | 0.0122 |
| 231174_s_at |           | Transcribed locus                                                                             | -0.1229 | 0.0379 |
| 231181_at   |           | Transcribed locus                                                                             | -0.7286 | 0      |
| 231182_at   | WIPF1     | WAS/WASL interacting protein family; member 1                                                 | -0.2206 | 0.0198 |
| 231189_at   | MGC40574  | hypothetical protein MGC40574                                                                 | -0.1828 | 0.0235 |
| 231195_at   | KLRG2     | killer cell lectin-like receptor subfamily G; member 2                                        | -0.1611 | 0.0037 |
| 231209_at   | C14orf73  | chromosome 14 open reading frame 73                                                           | -0.2039 | 0.0037 |
| 231210_at   | LOC283129 | hypothetical protein LOC283129                                                                | -0.1484 | 0.048  |
| 231211_s_at | LOC541469 | hypothetical protein LOC541469                                                                | -0.2032 | 0.0375 |
| 231213_at   | PDE1A     | phosphodiesterase 1A; calmodulin-dependent                                                    | -0.9105 | 0.0328 |
| 231216_at   | TMEM179   | Transmembrane protein 179                                                                     | -0.1455 | 0.0387 |
| 231222_at   |           | Transcribed locus                                                                             | -0.1402 | 0.005  |
| 231231_at   | FMNL3     | Formin-like 3                                                                                 | -0.1532 | 0.0102 |
| 231240_at   | DIO2      | deiodinase; iodothyronine; type II                                                            | -1.1121 | 0      |
| 231244_at   | CASD1     | CAS1 domain containing 1                                                                      | -0.1408 | 0.0032 |
| 231245_s_at |           |                                                                                               | -0.2117 | 0.0103 |
| 231270_at   | CA13      | carbonic anhydrase XIII                                                                       | -1.1292 | 0.0205 |
| 231275_at   | FLJ42875  | FLJ42875 protein                                                                              | -0.1833 | 0.0021 |
| 231279_at   | PATE      | expressed in prostate and testis                                                              | -0.1791 | 0.0109 |
| 231280_at   |           | Transcribed locus                                                                             | -0.1616 | 0.0005 |
| 231311_at   |           | CDNA FLJ11417 fis; clone HEMBA1000960                                                         | -0.5762 | 0.0346 |
| 231317_at   |           | Transcribed locus                                                                             | -0.1641 | 0.0295 |
| 231341_at   | SLC35D3   | solute carrier family 35; member D3                                                           | -0.205  | 0.0045 |
| 231343_at   |           |                                                                                               | -0.1323 | 0.0305 |
| 231354_at   | LOC780529 | hypothetical LOC780529                                                                        | -0.1356 | 0.0261 |
| 231358_at   |           | Transcribed locus                                                                             | -0.3163 | 0.0207 |
| 231363_at   | LELP1     | late cornified envelope-like proline-rich 1                                                   | -0.2756 | 0.0055 |
| 231367_s_at | LOC647131 | hypothetical LOC647131                                                                        | -0.6832 | 0.0001 |
| 231371_at   | TDRD10    | tudor domain containing 10                                                                    | -0.6386 | 0      |
| 231377_at   | LOC158830 | similar to Ab2-183                                                                            | -0.1444 | 0.032  |
| 231378_at   |           | Transcribed locus; moderately similar to XP_001095369.1 hypothetical protein [Macaca mulatta] | -0.2147 | 0.0156 |

|             |           |                                                                                                     |         |        |
|-------------|-----------|-----------------------------------------------------------------------------------------------------|---------|--------|
| 231387_at   |           | Transcribed locus                                                                                   | -0.2006 | 0.0143 |
| 231390_at   | LOC730116 | hypothetical protein LOC730116                                                                      | -0.1028 | 0.0214 |
| 231398_at   | SLC22A7   | solute carrier family 22 (organic anion transporter); member 7                                      | -0.1018 | 0.0476 |
| 231400_s_at |           | Transcribed locus                                                                                   | -0.1285 | 0.0137 |
| 231409_at   |           | Transcribed locus                                                                                   | -0.1178 | 0.0149 |
| 231411_at   | LHFP      | Lipoma HMGIC fusion partner                                                                         | -1.2034 | 0.0002 |
| 231418_at   |           | Transcribed locus                                                                                   | -0.1286 | 0.0009 |
| 231423_s_at | ANKRD16   | ankyrin repeat domain 16                                                                            | -0.2445 | 0.0115 |
| 231424_at   |           | MRNA; cDNA DKFZp564G223 (from clone DKFZp564G223)                                                   | -0.1543 | 0.0264 |
| 231427_at   | LOC284648 | hypothetical protein LOC284648                                                                      | -0.1172 | 0.0357 |
| 231434_at   | LOC728460 | similar to zinc finger protein 474                                                                  | -0.1581 | 0.0257 |
| 231445_at   |           | Transcribed locus; strongly similar to XP_530274.1 hypothetical protein XP_530274 [Pan troglodytes] | -0.1301 | 0.0163 |
| 231452_at   | HRASLS5   | HRAS-like suppressor family; member 5                                                               | -0.2471 | 0.0013 |
| 231456_at   |           | Transcribed locus                                                                                   | -0.1242 | 0.0279 |
| 231458_at   |           | CDNA clone IMAGE:5266545                                                                            | -0.1579 | 0.005  |
| 231462_at   | LOC283953 | Hypothetical LOC283953                                                                              | -0.2054 | 0.006  |
| 231470_at   | ZNF493    | Zinc finger protein 493                                                                             | -1.6318 | 0.0001 |
| 231473_at   |           | Transcribed locus                                                                                   | -0.1402 | 0.0003 |
| 231482_at   |           | MRNA; cDNA DKFZp781G0123 (from clone DKFZp781G0123)                                                 | -0.137  | 0.0356 |
| 231491_at   | C21orf23  | chromosome 21 open reading frame 23                                                                 | -0.1015 | 0.0267 |
| 231492_at   |           | Transcribed locus                                                                                   | -0.1387 | 0.0381 |
| 231496_at   | FCAMR     | Fc receptor; IgA; IgM; high affinity                                                                | -0.1276 | 0.012  |
| 231498_at   |           | CDNA clone IMAGE:4827941                                                                            | -0.1273 | 0.0195 |
| 231506_at   |           | Transcribed locus                                                                                   | -0.107  | 0.034  |
| 231530_s_at | C11orf1   | chromosome 11 open reading frame 1                                                                  | -0.9796 | 0.0034 |
| 231538_at   | C11orf1   | Chromosome 11 open reading frame 1                                                                  | -0.269  | 0.0052 |
| 231542_at   |           | Homo sapiens; clone IMAGE:3464359; mRNA                                                             | -0.2169 | 0.0079 |
| 231545_at   |           |                                                                                                     | -0.103  | 0.0341 |
| 231555_at   |           | Transcribed locus                                                                                   | -0.2646 | 0      |
| 231566_at   | C14orf148 | chromosome 14 open reading frame 148                                                                | -0.1064 | 0.0354 |
| 231567_s_at | CCDC62    | coiled-coil domain containing 62                                                                    | -0.1724 | 0.0179 |

|             |           |                                                                                                                                                                                                                                                                                                                                                                                                                         |         |        |
|-------------|-----------|-------------------------------------------------------------------------------------------------------------------------------------------------------------------------------------------------------------------------------------------------------------------------------------------------------------------------------------------------------------------------------------------------------------------------|---------|--------|
| 231568_at   | CT47.7    | cancer/testis CT47 family; member 1, cancer/testis CT47 family; member 10, cancer/testis CT47 family; member 11, cancer/testis CT47 family; member 2, cancer/testis CT47 family; member 3, cancer/testis CT47 family; member 4, cancer/testis CT47 family; member 5, cancer/testis CT47 family; member 6, cancer/testis CT47 family; member 7, cancer/testis CT47 family; member 8, cancer/testis CT47 family; member 9 | -0.1863 | 0.0189 |
| 231571_at   | LOC285827 | hypothetical protein LOC285827                                                                                                                                                                                                                                                                                                                                                                                          | -0.1923 | 0.0227 |
| 231572_at   | LOC136242 | similar to RIKEN cDNA 1700016G05                                                                                                                                                                                                                                                                                                                                                                                        | -0.1819 | 0.0278 |
| 231574_at   |           | Transcribed locus                                                                                                                                                                                                                                                                                                                                                                                                       | -0.1267 | 0.0173 |
| 231579_s_at | TIMP2     | TIMP metalloproteinase inhibitor 2                                                                                                                                                                                                                                                                                                                                                                                      | -1.0486 | 0.0218 |
| 231580_at   | LOC729464 | hypothetical protein LOC729464                                                                                                                                                                                                                                                                                                                                                                                          | -0.1455 | 0.0378 |
| 231589_at   |           |                                                                                                                                                                                                                                                                                                                                                                                                                         | -0.1811 | 0.0049 |
| 231593_at   |           | Transcribed locus                                                                                                                                                                                                                                                                                                                                                                                                       | -0.1349 | 0.0095 |
| 231595_at   |           | CDNA clone MGC:40177 IMAGE:5167345                                                                                                                                                                                                                                                                                                                                                                                      | -0.359  | 0      |
| 231596_at   |           | Transcribed locus                                                                                                                                                                                                                                                                                                                                                                                                       | -0.1311 | 0.0237 |
| 231604_at   |           | Transcribed locus                                                                                                                                                                                                                                                                                                                                                                                                       | -0.2841 | 0.0064 |
| 231605_at   |           | Transcribed locus                                                                                                                                                                                                                                                                                                                                                                                                       | -0.1092 | 0.0234 |
| 231611_at   |           | Transcribed locus; weakly similar to XP_001104477.1 hypothetical protein [Macaca mulatta]                                                                                                                                                                                                                                                                                                                               | -0.1771 | 0.0459 |
| 231619_at   |           | Transcribed locus                                                                                                                                                                                                                                                                                                                                                                                                       | -0.2165 | 0.031  |
| 231631_at   |           | Transcribed locus                                                                                                                                                                                                                                                                                                                                                                                                       | -0.1926 | 0.0015 |
| 231635_x_at | RNF31     | Ring finger protein 31                                                                                                                                                                                                                                                                                                                                                                                                  | -0.1427 | 0.0073 |
| 231639_at   |           | CDNA clone IMAGE:5277868                                                                                                                                                                                                                                                                                                                                                                                                | -0.2429 | 0.0153 |
| 231644_at   |           | Transcribed locus                                                                                                                                                                                                                                                                                                                                                                                                       | -1.5071 | 0.008  |
| 231651_at   |           | CDNA FLJ36110 fis; clone TESTI2021939                                                                                                                                                                                                                                                                                                                                                                                   | -0.1575 | 0.049  |
| 231652_at   |           | Homo sapiens; clone IMAGE:5744200; mRNA                                                                                                                                                                                                                                                                                                                                                                                 | -0.1179 | 0.0357 |
| 231659_at   | ST3GAL3   | ST3 beta-galactoside alpha-2;3-sialyltransferase 3                                                                                                                                                                                                                                                                                                                                                                      | -0.146  | 0.0353 |
| 231667_at   | SLC39A5   | solute carrier family 39 (metal ion transporter); member 5                                                                                                                                                                                                                                                                                                                                                              | -0.16   | 0.0322 |
| 231669_at   | SEPP1     | Selenoprotein P; plasma; 1                                                                                                                                                                                                                                                                                                                                                                                              | -0.2404 | 0.0159 |
| 231670_at   |           |                                                                                                                                                                                                                                                                                                                                                                                                                         | -0.1805 | 0.0068 |
| 231671_at   | FGA       | Fibrinogen alpha chain                                                                                                                                                                                                                                                                                                                                                                                                  | -0.1469 | 0.0368 |
| 231681_x_at | HIST3H2A  | Histone cluster 3; H2a                                                                                                                                                                                                                                                                                                                                                                                                  | -0.1495 | 0.0002 |
| 231687_at   |           | MRNA; cDNA DKFZp781F2222 (from clone DKFZp781F2222)                                                                                                                                                                                                                                                                                                                                                                     | -0.1067 | 0.0101 |
| 231699_at   | NFKBIA    | Nuclear factor of kappa light polypeptide gene enhancer in B-cells inhibitor; alpha                                                                                                                                                                                                                                                                                                                                     | -0.2427 | 0.0004 |
| 231700_at   | GUCA1A    | guanylate cyclase activator 1A (retina)                                                                                                                                                                                                                                                                                                                                                                                 | -0.1688 | 0.0159 |

|             |          |                                                                        |         |        |
|-------------|----------|------------------------------------------------------------------------|---------|--------|
| 231705_at   | HRSP12   | Heat-responsive protein 12                                             | -0.1694 | 0.032  |
| 231706_s_at | EVX1     | even-skipped homeobox 1                                                | -0.164  | 0.0086 |
| 231707_at   |          |                                                                        | -0.2127 | 0.0155 |
| 231722_at   | CASP14   | caspase 14; apoptosis-related cysteine peptidase                       | -0.2082 | 0.0004 |
| 231734_at   | RBP2     | retinol binding protein 2; cellular                                    | -0.1206 | 0.0322 |
| 231735_s_at | PRO1073  | PRO1073 protein                                                        | -0.6339 | 0.0081 |
| 231736_x_at | MGST1    | microsomal glutathione S-transferase 1                                 | -2.0238 | 0.0399 |
| 231746_at   | MIXL1    | Mix1 homeobox-like 1 ( <i>Xenopus laevis</i> )                         | -0.2006 | 0.0035 |
| 231748_at   | ULBP3    | UL16 binding protein 3                                                 | -0.1124 | 0.0265 |
| 231751_at   | ABCG8    | ATP-binding cassette; sub-family G (WHITE); member 8 (sterolin 2)      | -0.1156 | 0.0458 |
| 231752_at   | NPBWR1   | neuropeptides B/W receptor 1                                           | -0.1799 | 0.0414 |
| 231756_at   | ZP4      | zona pellucida glycoprotein 4                                          | -0.1079 | 0.0449 |
| 231766_s_at | COL12A1  | collagen; type XII; alpha 1                                            | -1.0214 | 0.0004 |
| 231769_at   | FBXO6    | F-box protein 6                                                        | -0.9191 | 0.044  |
| 231773_at   | ANGPTL1  | angiopoietin-like 1                                                    | -3.5791 | 0      |
| 231778_at   | DLX3     | distal-less homeobox 3                                                 | -0.1711 | 0.0257 |
| 231783_at   | CHRM1    | cholinergic receptor; muscarinic 1                                     | -0.1454 | 0.0243 |
| 231785_at   | NTF5     | neurotrophin 5 (neurotrophin 4/5)                                      | -0.1149 | 0.0423 |
| 231788_at   | GPR92    | G protein-coupled receptor 92                                          | -0.176  | 0.0259 |
| 231790_at   | DMGDH    | dimethylglycine dehydrogenase                                          | -0.4733 | 0.0298 |
| 231795_at   | STON1    | stonin 1                                                               | -0.1532 | 0.001  |
| 231796_at   | EPHA8    | EPH receptor A8                                                        | -0.2542 | 0.0034 |
| 231804_at   | RXFP1    | relaxin/insulin-like family peptide receptor 1                         | -2.7908 | 0      |
| 231807_at   | KIAA1217 | KIAA1217                                                               | -2.0259 | 0.0001 |
| 231817_at   | USP53    | ubiquitin specific peptidase 53                                        | -2.8469 | 0      |
| 231835_at   | C1orf93  | chromosome 1 open reading frame 93                                     | -1.8586 | 0.0001 |
| 231851_at   | RAVER2   | ribonucleoprotein; PTB-binding 2                                       | -0.7411 | 0.0286 |
| 231857_s_at | AGBL5    | ATP/GTP binding protein-like 5                                         | -0.3876 | 0.0319 |
| 231867_at   | ODZ2     | odz; odd Oz/ten-m homolog 2 ( <i>Drosophila</i> )                      | -0.7147 | 0.001  |
| 231873_at   | BMPR2    | bone morphogenetic protein receptor; type II (serine/threonine kinase) | -0.8284 | 0.0052 |
| 231879_at   | COL12A1  | collagen; type XII; alpha 1                                            | -0.6464 | 0.0025 |
| 231881_at   | CALD1    | caldesmon 1                                                            | -0.1777 | 0.002  |
| 231899_at   | ZC3H12C  | zinc finger CCCH-type containing 12C                                   | -1.2681 | 0.0011 |
| 231910_at   | NUDT14   | Nudix (nucleoside diphosphate linked moiety X)-type motif 14           | -0.1072 | 0.0181 |
| 231914_at   | NUDT14   | nudix (nucleoside diphosphate linked moiety X)-type motif 14           | -0.5783 | 0.0202 |
| 231919_at   | DBT      | dihydroipoamide branched chain transacylase E2                         | -0.7813 | 0.0004 |
| 231923_at   | FLJ12993 | hypothetical LOC441027                                                 | -1.5493 | 0.0001 |



|             |           |                                                                                                           |         |        |
|-------------|-----------|-----------------------------------------------------------------------------------------------------------|---------|--------|
| 231930_at   | ELMOD1    | ELMO/CED-12 domain containing 1                                                                           | -0.585  | 0.0029 |
| 231948_s_at | UBE2F     | ubiquitin-conjugating enzyme E2F (putative)                                                               | -0.4714 | 0.0078 |
| 231983_at   | C1orf69   | chromosome 1 open reading frame 69                                                                        | -0.2985 | 0.0181 |
| 231984_at   | MTAP      | methylthioadenosine phosphorylase                                                                         | -1.5367 | 0      |
| 231987_at   | LOC728264 | hypothetical protein LOC728264                                                                            | -0.2869 | 0.0441 |
| 231995_at   | C9orf82   | chromosome 9 open reading frame 82                                                                        | -0.5466 | 0.0211 |
| 232003_at   | KIAA1183  | KIAA1183 protein                                                                                          | -1.4325 | 0.0004 |
| 232006_at   | STK35     | Serine/threonine kinase 35                                                                                | -0.1032 | 0.0102 |
| 232042_at   | TTYH2     | tweety homolog 2 (Drosophila)                                                                             | -0.2415 | 0.0049 |
| 232068_s_at | TLR4      | toll-like receptor 4                                                                                      | -1.1399 | 0      |
| 232073_at   | PPFIA2    | protein tyrosine phosphatase; receptor type; f polypeptide (PTPRF); interacting protein (liprin); alpha 2 | -0.2581 | 0.0298 |
| 232081_at   |           | EST from clone 208499; full insert                                                                        | -2.5643 | 0.0001 |
| 232088_x_at |           | CDNA clone IMAGE:4829494                                                                                  | -0.2535 | 0.041  |
| 232090_at   |           | CDNA FLJ11481 fis; clone HEMBA1001803                                                                     | -1.0212 | 0.0035 |
| 232093_at   | LOC147650 | hypothetical protein LOC147650, hypothetical protein LOC729781                                            | -0.217  | 0.0024 |
| 232104_at   | C1orf95   | chromosome 1 open reading frame 95                                                                        | -0.1417 | 0.0322 |
| 232110_at   |           | CDNA FLJ12136 fis; clone MAMMA1000312                                                                     | -0.1172 | 0.0126 |
| 232115_at   | SLC39A3   | solute carrier family 39 (zinc transporter); member 3                                                     | -0.1535 | 0.0261 |
| 232122_s_at | VEPH1     | ventricular zone expressed PH domain homolog 1 (zebrafish)                                                | -3.1425 | 0.0009 |
| 232142_at   |           | CDNA FLJ13973 fis; clone Y79AA1001555                                                                     | -0.1131 | 0.0282 |
| 232153_at   | SPEG      | SPEG complex locus                                                                                        | -0.2451 | 0.0038 |
| 232170_at   | S100A7A   | S100 calcium binding protein A7A                                                                          | -0.1067 | 0.0235 |
| 232172_at   | LOC401577 | hypothetical protein LOC401577                                                                            | -0.3323 | 0      |
| 232175_at   | ARF1      | ADP-ribosylation factor 1                                                                                 | -0.3795 | 0.0136 |
| 232177_at   |           | Homo sapiens; clone IMAGE:5415705                                                                         | -0.2324 | 0.0027 |
| 232183_at   | SERAC1    | serine active site containing 1                                                                           | -0.6548 | 0.0295 |
| 232185_at   | C20orf132 | chromosome 20 open reading frame 132                                                                      | -0.2918 | 0      |
| 232187_at   | PALMD     | palmelphin                                                                                                | -0.277  | 0.005  |
| 232189_at   |           | CDNA: FLJ22806 fis; clone KAIA2845                                                                        | -0.1472 | 0.0056 |
| 232191_at   | C21orf105 | chromosome 21 open reading frame 105                                                                      | -0.1418 | 0.0015 |
| 232201_at   | NKD2      | naked cuticle homolog 2 (Drosophila)                                                                      | -0.6304 | 0      |
| 232213_at   | PELI1     | Pellino homolog 1 (Drosophila)                                                                            | -0.5545 | 0.0323 |
| 232220_at   | S100A7A   | S100 calcium binding protein A7A                                                                          | -0.1863 | 0.0188 |
| 232227_at   |           | HSPC324                                                                                                   | -0.2243 | 0.0007 |
| 232241_at   |           |                                                                                                           | -0.1889 | 0.0003 |

|             |              |                                                                           |         |        |
|-------------|--------------|---------------------------------------------------------------------------|---------|--------|
| 232243_at   | MCPH1        | microcephaly; primary autosomal recessive 1                               | -0.1445 | 0.0191 |
| 232245_at   | SLC25A34     | solute carrier family 25; member 34                                       | -0.8862 | 0      |
| 232248_at   |              | CDNA: FLJ22566 fis; clone HSI01980                                        | -0.1643 | 0.0234 |
| 232250_at   | KIAA1257     | KIAA1257                                                                  | -0.1212 | 0.01   |
| 232252_at   | DUSP27       | dual specificity phosphatase 27 (putative)                                | -0.2803 | 0      |
| 232259_s_at | LOC100009676 | hypothetical LOC100009676                                                 | -0.2259 | 0.0188 |
| 232262_at   | PIGL         | phosphatidylinositol glycan anchor biosynthesis; class L                  | -0.6058 | 0.0001 |
| 232270_at   | C9orf3       | Chromosome 9 open reading frame 3                                         | -1.1795 | 0      |
| 232280_at   | SLC25A29     | Solute carrier family 25; member 29                                       | -0.3334 | 0.0018 |
| 232284_at   | PSMD6        | Proteasome (prosome; macropain) 26S subunit; non-ATPase; 6                | -0.2261 | 0.0115 |
| 232287_at   | PGBD3        | piggyBac transposable element derived 3                                   | -0.1663 | 0.0257 |
| 232291_at   | MIRH1        | microRNA host gene (non-protein coding) 1                                 | -0.5059 | 0.0004 |
| 232292_at   |              | CDNA FLJ13509 fis; clone PLACE1005108                                     | -0.1903 | 0.0105 |
| 232304_at   | PELI1        | Pellino homolog 1 (Drosophila)                                            | -0.9432 | 0.0202 |
| 232305_at   | HMGCLL1      | 3-hydroxymethyl-3-methylglutaryl-Coenzyme A lyase-like 1                  | -0.2014 | 0.0145 |
| 232310_at   | LOC388889    | hypothetical LOC388889                                                    | -0.2249 | 0.0005 |
| 232313_at   | TMEM132C     | transmembrane protein 132C                                                | -0.647  | 0      |
| 232322_x_at | STARD10      | StAR-related lipid transfer (START) domain containing 10                  | -2.0152 | 0.002  |
| 232325_at   |              | MRNA full length insert cDNA clone EUROIMAGE 196784                       | -0.1001 | 0.0312 |
| 232326_at   | C8orf56      | chromosome 8 open reading frame 56                                        | -0.1599 | 0.0024 |
| 232332_at   | RP13-347D8.3 | KIAA1210 protein                                                          | -2.3421 | 0      |
| 232336_at   | ZSWIM5       | zinc finger; SWIM-type containing 5                                       | -1.0532 | 0.0077 |
| 232345_at   | C18orf8      | Chromosome 18 open reading frame 8                                        | -0.5091 | 0.0002 |
| 232348_at   | C18orf8      | Chromosome 18 open reading frame 8                                        | -0.8134 | 0      |
| 232349_x_at | IQWD1        | IQ motif and WD repeats 1                                                 | -0.9326 | 0.0036 |
| 232354_at   |              | CDNA FLJ12021 fis; clone HEMBB1001756                                     | -0.5707 | 0.0271 |
| 232367_x_at | ZNF598       | zinc finger protein 598                                                   | -0.2423 | 0.0436 |
| 232374_s_at |              |                                                                           | -0.1903 | 0.0247 |
| 232377_at   | NXPH1        | neurexophilin 1                                                           | -4.9585 | 0      |
| 232394_at   |              | MRNA; cDNA DKFZp434L231 (from clone DKFZp434L231)                         | -0.1733 | 0.0326 |
| 232401_at   | KCNS2        | potassium voltage-gated channel; delayed-rectifier; subfamily S; member 2 | -0.1296 | 0.0246 |
| 232419_at   | TMEM132A     | transmembrane protein 132A                                                | -0.3184 | 0.0038 |
| 232422_at   | RP11-151A6.2 | hypothetical protein BC004360                                             | -0.5146 | 0.0063 |
| 232433_at   | KIAA1683     | KIAA1683                                                                  | -0.1617 | 0.0442 |
| 232434_at   | DIRC3        | disrupted in renal carcinoma 3                                            | -0.2251 | 0.0184 |

|             |               |                                                                                        |         |        |
|-------------|---------------|----------------------------------------------------------------------------------------|---------|--------|
| 232435_at   | CXorf45       | chromosome X open reading frame 45                                                     | -0.1879 | 0.0071 |
| 232443_at   | LOC441052     | hypothetical gene supported by AF131741                                                | -0.167  | 0.0048 |
| 232456_at   | C10orf71      | chromosome 10 open reading frame 71                                                    | -0.1696 | 0.0192 |
| 232460_at   |               | CDNA: FLJ22870 fis; clone KAT02506; highly similar to D84064 Homo sapiens mRNA for Hrs | -0.1217 | 0.0183 |
| 232472_at   |               | CDNA FLJ12399 fis; clone MAMMA1002780                                                  | -0.8534 | 0.0173 |
| 232493_at   |               | Transcribed locus                                                                      | -0.48   | 0.0142 |
| 232499_at   | ITPKB         | inositol 1;4;5-trisphosphate 3-kinase B                                                | -0.1473 | 0.0301 |
| 232520_s_at | NSFL1C        | NSFL1 (p97) cofactor (p47)                                                             | -0.4004 | 0.0043 |
| 232527_at   |               | CDNA FLJ13309 fis; clone OVARC1001442                                                  | -1.2121 | 0      |
| 232539_at   |               | MRNA; cDNA DKFZp761H1023 (from clone DKFZp761H1023)                                    | -0.4204 | 0.006  |
| 232583_at   |               | CDNA FLJ11435 fis; clone HEMBA1001208                                                  | -0.3777 | 0.0445 |
| 232589_at   |               | CDNA FLJ11489 fis; clone HEMBA1001915                                                  | -0.5933 | 0.0446 |
| 232605_s_at | LOC646871     | hypothetical LOC646871                                                                 | -0.2352 | 0.0061 |
| 232617_at   | CTSS          | cathepsin S                                                                            | -1.0282 | 0.0485 |
| 232618_at   | CYorf15A      | chromosome Y open reading frame 15A                                                    | -1.4837 | 0.0119 |
| 232620_at   | LOC56964      | hypothetical protein from EUROIMAGE 384293                                             | -0.1582 | 0.0348 |
| 232623_at   |               | CDNA: FLJ20888 fis; clone ADKA03289                                                    | -0.1911 | 0.01   |
| 232634_at   | DKFZp566F0947 | hypothetical gene DKFZp566F0947                                                        | -0.166  | 0.0334 |
| 232636_at   | SLITRK4       | SLIT and NTRK-like family; member 4                                                    | -4.3399 | 0      |
| 232655_at   | UGT1A6        | UDP glucuronosyltransferase 1 family; polypeptide A6                                   | -0.1401 | 0.0063 |
| 232657_at   |               | CDNA FLJ13400 fis; clone PLACE1001414                                                  | -0.1596 | 0.0034 |
| 232678_at   | SLC2A9        | solute carrier family 2 (facilitated glucose transporter); member 9                    | -0.2183 | 0.0032 |
| 232697_at   | LRFN2         | leucine rich repeat and fibronectin type III domain containing 2                       | -0.1346 | 0.0347 |
| 232698_at   | BPIL1         | bactericidal/permeability-increasing protein-like 1                                    | -0.1929 | 0.005  |
| 232709_at   |               | CDNA FLJ13427 fis; clone PLACE1002477                                                  | -0.2336 | 0.0482 |
| 232715_at   |               | CDNA FLJ11544 fis; clone HEMBA1002826                                                  | -0.2126 | 0.0002 |
| 232719_at   | BRUNOL4       | bruno-like 4; RNA binding protein (Drosophila)                                         | -0.1576 | 0.0042 |
| 232724_at   | MS4A6A        | membrane-spanning 4-domains; subfamily A; member 6A                                    | -0.5267 | 0.0013 |
| 232725_s_at | MS4A6A        | membrane-spanning 4-domains; subfamily A; member 6A                                    | -0.1645 | 0.0172 |
| 232726_at   |               | CDNA: FLJ21303 fis; clone COL02107                                                     | -2.0804 | 0.0006 |
| 232743_at   |               | MRNA; cDNA DKFZp761K1112 (from clone DKFZp761K1112)                                    | -0.1422 | 0.0269 |
| 232750_at   | TNS1          | Tensin 1                                                                               | -1.6725 | 0.0019 |

|             |             |                                                                                                                |         |        |
|-------------|-------------|----------------------------------------------------------------------------------------------------------------|---------|--------|
| 232763_at   | TLN1        | Talin 1                                                                                                        | -0.346  | 0.0001 |
| 232765_x_at | LOC146429   | hypothetical protein LOC146429                                                                                 | -0.1692 | 0.0095 |
| 232766_at   | C20orf179   | chromosome 20 open reading frame 179                                                                           | -0.1313 | 0.0118 |
| 232776_at   |             | CDNA FLJ11646 fis; clone HEMBA1004394                                                                          | -0.7479 | 0.0177 |
| 232783_at   |             | CDNA FLJ13625 fis; clone PLACE1011032                                                                          | -0.1298 | 0.0293 |
| 232795_at   |             | CDNA FLJ10145 fis; clone HEMBA1003322                                                                          | -0.3464 | 0      |
| 232807_at   | FAM131A     | family with sequence similarity 131; member A                                                                  | -0.1641 | 0.0415 |
| 232808_at   |             | CDNA FLJ12293 fis; clone MAMMA1001815                                                                          | -0.3893 | 0.0053 |
| 232811_x_at | PRICKLE1    | Prickle homolog 1 (Drosophila)                                                                                 | -0.1935 | 0.0302 |
| 232820_s_at | FAM112A     | family with sequence similarity 112; member A                                                                  | -0.2072 | 0.0107 |
| 232821_at   | FAM112A     | family with sequence similarity 112; member A                                                                  | -0.1431 | 0.0163 |
| 232831_at   |             | CDNA FLJ11910 fis; clone HEMBB1000113                                                                          | -0.3292 | 0      |
| 232835_at   |             | Transcribed locus                                                                                              | -0.5888 | 0.0005 |
| 232837_at   | KIF13A      | kinesin family member 13A                                                                                      | -0.3296 | 0.0017 |
| 232856_at   | LRRC55      | Leucine rich repeat containing 55                                                                              | -0.167  | 0.0167 |
| 232863_at   | ZNF815      | zinc finger protein 815                                                                                        | -0.1213 | 0.048  |
| 232887_at   | hCG_1776018 | HCG1776018                                                                                                     | -0.1715 | 0.0103 |
| 232892_at   | C20orf166   | chromosome 20 open reading frame 166                                                                           | -0.2471 | 0.0114 |
| 232899_at   | FAM41C      | family with sequence similarity 41; member C, ribosomal protein L23a pseudogene 7, similar to RPL23AP7 protein | -0.6413 | 0.0191 |
| 232902_s_at | RARS2       | arginyl-tRNA synthetase 2; mitochondrial (putative)                                                            | -0.9525 | 0.0395 |
| 232926_x_at | ANKRD19     | ankyrin repeat domain 19                                                                                       | -0.1116 | 0.027  |
| 232949_at   |             | CDNA FLJ11873 fis; clone HEMBA1007066                                                                          | -0.1814 | 0.017  |
| 232956_at   |             | CDNA FLJ12293 fis; clone MAMMA1001815                                                                          | -0.1168 | 0.0329 |
| 232983_s_at | SERGEF      | secretion regulating guanine nucleotide exchange factor                                                        | -0.5249 | 0.0053 |
| 232992_at   | C6orf64     | Chromosome 6 open reading frame 64                                                                             | -0.1762 | 0.0028 |
| 232994_s_at | RGNEF       | Rho-guanine nucleotide exchange factor                                                                         | -1.9547 | 0.0001 |
| 232995_at   |             | CDNA: FLJ21725 fis; clone COLF1013                                                                             | -0.2288 | 0.0204 |
| 233001_at   | SAMD10      | sterile alpha motif domain containing 10                                                                       | -0.1289 | 0.0104 |
| 233031_at   | ZEB2        | zinc finger E-box binding homeobox 2                                                                           | -0.347  | 0      |
| 233051_at   | SLITRK2     | SLIT and NTRK-like family; member 2                                                                            | -0.2084 | 0.0107 |
| 233059_at   |             | CDNA: FLJ22731 fis; clone HSI15841                                                                             | -0.2028 | 0.0046 |
| 233060_at   | ZMIZ1       | zinc finger; MIZ-type containing 1                                                                             | -0.1872 | 0.0169 |
| 233085_s_at | OBFC2A      | oligonucleotide/oligosaccharide-binding fold containing 2A                                                     | -1.1708 | 0.0248 |

|             |              |                                                                                             |         |        |
|-------------|--------------|---------------------------------------------------------------------------------------------|---------|--------|
| 233091_at   | ATAD3B       | ATPase family; AAA domain containing 3B                                                     | -0.1613 | 0.0399 |
| 233103_at   |              | CDNA FLJ14109 fis; clone MAMMA1001322; moderately similar to B-CELL GROWTH FACTOR PRECURSOR | -0.1326 | 0.0413 |
| 233107_at   |              | CDNA: FLJ23530 fis; clone LNG06055                                                          | -0.2011 | 0.0021 |
| 233109_at   | COL12A1      | Collagen; type XII; alpha 1                                                                 | -0.5317 | 0.0005 |
| 233113_at   | LOC730057    | Hypothetical protein LOC730057                                                              | -0.1457 | 0.0164 |
| 233116_at   |              | CDNA FLJ25090 fis; clone CBL08887                                                           | -0.7    | 0.0316 |
| 233119_at   | FLJ14213     | Hypothetical protein FLJ14213                                                               | -0.1154 | 0.0328 |
| 233121_at   |              | CDNA FLJ12299 fis; clone MAMMA1001851                                                       | -0.574  | 0.0011 |
| 233127_at   |              | CDNA FLJ12412 fis; clone MAMMA1003004                                                       | -4.076  | 0      |
| 233130_at   |              | CDNA FLJ12202 fis; clone MAMMA1000908                                                       | -0.8878 | 0.0007 |
| 233131_at   | C10orf80     | chromosome 10 open reading frame 80                                                         | -0.2037 | 0.0014 |
| 233134_at   | RPH3AL       | rabphilin 3A-like (without C2 domains)                                                      | -0.1906 | 0      |
| 233136_at   | PABPC5       | poly(A) binding protein; cytoplasmic 5                                                      | -0.7138 | 0.0299 |
| 233150_at   | GALNTL5      | UDP-N-acetyl-alpha-D-galactosamine:polypeptide N-acetylgalactosaminyltransferase-like 5     | -0.1057 | 0.0295 |
| 233156_at   | RNASEH2B     | ribonuclease H2; subunit B                                                                  | -0.1031 | 0.044  |
| 233158_at   | KRT82        | keratin 82                                                                                  | -0.1648 | 0.0366 |
| 233159_at   | STARD13      | START domain containing 13                                                                  | -0.1063 | 0.0412 |
| 233166_at   | DEFB126      | defensin; beta 126                                                                          | -0.2162 | 0.0008 |
| 233168_s_at | RP3-402G11.5 | selenoprotein O                                                                             | -0.6247 | 0.0126 |
| 233181_at   |              | Full length insert cDNA clone ZD76B01                                                       | -0.1491 | 0.0288 |
| 233189_at   |              | Clone 24974 mRNA sequence                                                                   | -0.135  | 0.005  |
| 233200_at   |              |                                                                                             | -0.1775 | 0.0029 |
| 233204_at   | FLJ11903     | similar to hypothetical protein MGC40405                                                    | -0.1886 | 0.0187 |
| 233221_at   | DEFB118      | defensin; beta 118                                                                          | -0.2276 | 0.0059 |
| 233223_at   |              | CDNA FLJ20843 fis; clone ADKA01954                                                          | -1.0241 | 0.0034 |
| 233236_at   | TSPAN16      | tetraspanin 16                                                                              | -0.1044 | 0.0333 |
| 233245_at   | C6orf107     | chromosome 6 open reading frame 107                                                         | -0.1997 | 0.0051 |
| 233247_x_at | ZDHHC21      | zinc finger; DHHC-type containing 21                                                        | -0.1699 | 0.0028 |
| 233260_at   |              | CDNA FLJ13528 fis; clone PLACE1006143                                                       | -0.1299 | 0.0164 |
| 233266_at   |              | CDNA FLJ13844 fis; clone THYRO1000805                                                       | -0.1854 | 0.0257 |
| 233267_at   | SELENBP1     | Selenium binding protein 1                                                                  | -0.1161 | 0.0322 |
| 233274_at   |              | CDNA FLJ11615 fis; clone HEMBA1004024                                                       | -0.2968 | 0.0155 |

|             |             |                                                                    |         |        |
|-------------|-------------|--------------------------------------------------------------------|---------|--------|
| 233285_at   |             | CDNA FLJ13635 fis; clone PLACE1011143                              | -0.1191 | 0.045  |
| 233291_at   |             | CDNA FLJ11962 fis; clone HEMBB1001047                              | -0.3772 | 0.028  |
| 233301_at   | OXCT2       | 3-oxoacid CoA transferase 2                                        | -0.1778 | 0      |
| 233317_at   | CD9         | CD9 molecule                                                       | -0.2337 | 0.0104 |
| 233335_at   |             | MRNA; cDNA DKFZp586J1717 (from clone DKFZp586J1717)                | -0.1265 | 0.028  |
| 233342_at   | LOC90520    | hypothetical protein LOC90520                                      | -0.1106 | 0.0322 |
| 233365_at   |             | CDNA FLJ12285 fis; clone MAMMA1001764                              | -1.0398 | 0.0101 |
| 233375_at   | EFCAB2      | EF-hand calcium binding domain 2                                   | -1.0841 | 0.0021 |
| 233378_at   | LOC731419   | hypothetical protein LOC731419                                     | -0.1427 | 0.0094 |
| 233387_s_at | PCNT        | pericentrin (kendrin)                                              | -0.1337 | 0.0423 |
| 233416_at   |             | CDNA FLJ30762 fis; clone FEBRA2000575                              | -0.1739 | 0.0165 |
| 233442_at   |             | CDNA FLJ12196 fis; clone MAMMA1000867                              | -1.291  | 0.0303 |
| 233460_at   |             | Clone FLB3043                                                      | -0.1532 | 0.0065 |
| 233479_at   |             | CDNA FLJ12362 fis; clone MAMMA1002360                              | -4.1426 | 0      |
| 233486_at   | LOC729940   | hypothetical protein LOC729940                                     | -0.1755 | 0.0349 |
| 233506_at   |             | Full length insert cDNA clone ZB81B12                              | -2.3039 | 0      |
| 233513_at   |             | CDNA FLJ12999 fis; clone NT2RP3000324                              | -0.142  | 0.0381 |
| 233524_at   | C9orf44     | chromosome 9 open reading frame 44                                 | -0.1588 | 0.0301 |
| 233531_at   | SLC46A1     | Solute carrier family 46; member 1                                 | -0.1394 | 0.0296 |
| 233537_at   | KRTAP3-1    | keratin associated protein 3-1                                     | -0.159  | 0.0034 |
| 233542_at   |             | Clone IMAGE:241742; mRNA sequence                                  | -0.1051 | 0.0121 |
| 233584_at   |             |                                                                    | -0.18   | 0.0011 |
| 233585_at   | SDK2        | sidekick homolog 2 (chicken)                                       | -0.1471 | 0.0492 |
| 233586_s_at | KLK12       | kallikrein-related peptidase 12                                    | -0.2266 | 0.0297 |
| 233589_x_at | C9orf167    | chromosome 9 open reading frame 167                                | -0.2319 | 0.0022 |
| 233597_at   | PNPLA5      | patatin-like phospholipase domain containing 5                     | -0.1376 | 0.0022 |
| 233598_at   | hCG_2045828 | hCG2045828                                                         | -0.1552 | 0.0099 |
| 233601_at   |             |                                                                    | -0.177  | 0.0342 |
| 233611_at   |             | CDNA FLJ12106 fis; clone HEMBB1002702                              | -1.429  | 0.0034 |
| 233619_at   |             |                                                                    | -0.1328 | 0.0228 |
| 233623_at   |             | Clone FLB3107                                                      | -0.2589 | 0.0001 |
| 233634_at   | MARVELD3    | MARVEL domain containing 3                                         | -0.1232 | 0.0412 |
| 233636_at   | MIRH1       | microRNA host gene (non-protein coding) 1                          | -0.1298 | 0.0123 |
| 233639_at   | POMGNT1     | protein O-linked mannanose beta1,2-N-acetylglucosaminyltransferase | -0.1265 | 0.0349 |
| 233647_s_at | CDADC1      | cytidine and dCMP deaminase domain containing 1                    | -1.0567 | 0.0017 |
| 233648_at   |             | CDNA: FLJ23261 fis; clone COL05862                                 | -2.4369 | 0      |

|             |           |                                                           |         |        |
|-------------|-----------|-----------------------------------------------------------|---------|--------|
| 233650_at   | CEP63     | centrosomal protein 63kDa                                 | -0.1725 | 0.0006 |
| 233657_at   | OPN5      | opsin 5                                                   | -0.1329 | 0.0149 |
| 233668_at   |           | Clone IMAGE:113399 mRNA sequence                          | -0.1717 | 0.0003 |
| 233669_s_at | TRIM54    | tripartite motif-containing 54                            | -0.3217 | 0.0001 |
| 233686_at   | ASXL3     | additional sex combs like 3 (Drosophila)                  | -0.1114 | 0.0194 |
| 233690_at   |           | CDNA: FLJ23090 fis; clone LNG07119                        | -0.4575 | 0.0447 |
| 233691_at   |           | CDNA: FLJ21706 fis; clone COL09945                        | -1.899  | 0      |
| 233695_s_at | CECR2     | cat eye syndrome chromosome region; candidate 2           | -0.1411 | 0.0099 |
| 233696_at   |           | CDNA: FLJ21357 fis; clone COL02835                        | -0.2844 | 0.0036 |
| 233720_at   | SORBS2    | Sorbin and SH3 domain containing 2                        | -2.1405 | 0.0002 |
| 233725_at   |           |                                                           | -0.1269 | 0.0261 |
| 233731_at   |           | MRNA; cDNA DKFZp564D123 (from clone DKFZp564D123)         | -0.2183 | 0.0042 |
| 233734_s_at | OSBPL5    | oxysterol binding protein-like 5                          | -0.3878 | 0.0007 |
| 233739_at   |           | MRNA; cDNA DKFZp564M093 (from clone DKFZp564M093)         | -0.1134 | 0.0184 |
| 233740_at   | PRO1268   | PRO1268 protein                                           | -0.134  | 0.0071 |
| 233741_at   | FTCD      | formiminotransferase cyclodeaminase                       | -0.1563 | 0.0317 |
| 233746_x_at | HYPK      | Huntingtin interacting protein K                          | -0.5042 | 0.0018 |
| 233749_at   | MSN       | Moesin                                                    | -0.1206 | 0.0377 |
| 233751_at   | ZFHX3     | zinc finger homeobox 3                                    | -0.1071 | 0.0096 |
| 233767_at   |           | CDNA FLJ12557 fis; clone NT2RM4000783                     | -0.1485 | 0.0238 |
| 233785_at   | ADAMTS9   | ADAM metallopeptidase with thrombospondin type 1 motif; 9 | -0.1393 | 0.0083 |
| 233795_at   | ODF3      | outer dense fiber of sperm tails 3                        | -0.1909 | 0.0228 |
| 233798_at   |           | CDNA FLJ10285 fis; clone HEMBB1001369                     | -0.1494 | 0.002  |
| 233806_at   |           | CDNA FLJ10073 fis; clone HEMBA1001731                     | -0.1492 | 0.0266 |
| 233812_at   |           |                                                           | -0.1726 | 0.0296 |
| 233820_at   |           | CDNA: FLJ22542 fis; clone HSI00196                        | -0.3824 | 0.0013 |
| 233843_at   | ZBTB12    | zinc finger and BTB domain containing 12                  | -0.1045 | 0.0211 |
| 233846_at   | CCDC85A   | coiled-coil domain containing 85A                         | -0.1879 | 0.0407 |
| 233855_at   | LOC284017 | hypothetical protein LOC284017                            | -0.1884 | 0.0009 |
| 233863_at   | CASZ1     | castor zinc finger 1                                      | -0.1636 | 0.0063 |
| 233892_at   | GRIN3B    | glutamate receptor; ionotropic; N-methyl-D-aspartate 3B   | -0.11   | 0.0416 |
| 233900_at   |           | Expressed unknown mRNA                                    | -0.1079 | 0.0335 |
| 233913_at   | WFDC10A   | WAP four-disulfide core domain 10A                        | -0.1727 | 0.0071 |
| 233920_at   |           | CDNA FLJ12016 fis; clone HEMBB1001707                     | -0.1328 | 0.0205 |
| 233925_at   |           | MRNA; cDNA DKFZp586D0724 (from clone DKFZp586D0724)       | -0.135  | 0.0337 |

|             |           |                                                                                                                  |         |        |
|-------------|-----------|------------------------------------------------------------------------------------------------------------------|---------|--------|
| 233930_at   | DMRT3     | doublesex and mab-3 related transcription factor 3                                                               | -0.1121 | 0.0301 |
| 233938_at   | FLJ22675  | hypothetical gene supported by AK026328                                                                          | -0.5224 | 0.0011 |
| 233952_s_at | ZNF295    | zinc finger protein 295                                                                                          | -1.9774 | 0      |
| 233962_at   | C20orf120 | chromosome 20 open reading frame 120                                                                             | -0.1722 | 0.0378 |
| 233965_at   | LOC255480 | hypothetical protein LOC255480                                                                                   | -0.1282 | 0.0049 |
| 233966_at   |           | CDNA: FLJ22271 fis; clone HRC03191                                                                               | -0.1303 | 0.0195 |
| 233985_x_at | PPP1R9A   | protein phosphatase 1; regulatory (inhibitor) subunit 9A                                                         | -0.2897 | 0.0482 |
| 233991_at   |           | Clone 24894 mRNA sequence                                                                                        | -0.2041 | 0.0101 |
| 233994_at   |           | Clone 24894 mRNA sequence                                                                                        | -1.112  | 0.0001 |
| 234009_at   |           | CDNA FLJ13777 fis; clone PLACE4000392                                                                            | -0.1597 | 0.009  |
| 234012_at   |           | MRNA; chromosome 1 specific transcript KIAA0497                                                                  | -0.1951 | 0.0089 |
| 234014_at   |           | CDNA FLJ10003 fis; clone HEMBA1000050                                                                            | -0.1676 | 0.0035 |
| 234018_s_at | SEL1L2    | sel-1 suppressor of lin-12-like 2 (C. elegans)                                                                   | -0.1723 | 0.0006 |
| 234024_at   | CBLN4     | cerebellin 4 precursor                                                                                           | -1.6538 | 0      |
| 234027_at   | CCDC129   | coiled-coil domain containing 129                                                                                | -0.1353 | 0.0187 |
| 234044_at   |           | CDNA: FLJ22608 fis; clone HSI04854                                                                               | -0.1489 | 0.0044 |
| 234045_x_at | BHLHB4    | basic helix-loop-helix domain containing; class B; 4                                                             | -0.1523 | 0.0103 |
| 234055_s_at | GZF1      | GDNF-inducible zinc finger protein 1                                                                             | -1.7299 | 0      |
| 234064_at   |           | CDNA: FLJ21247 fis; clone COL01205                                                                               | -0.1432 | 0.0069 |
| 234066_at   | IL1RL1    | Interleukin 1 receptor-like 1                                                                                    | -1.4732 | 0      |
| 234070_at   |           | CDNA FLJ10289 fis; clone MAMMA1002319                                                                            | -0.161  | 0.0002 |
| 234072_at   | SEMA4A    | sema domain; immunoglobulin domain (Ig); transmembrane domain (TM) and short cytoplasmic domain; (semaphorin) 4A | -0.1294 | 0.0451 |
| 234077_at   |           | CDNA FLJ11664 fis; clone HEMBA1004632                                                                            | -0.2268 | 0.0283 |
| 234078_at   | LOC730057 | Hypothetical protein LOC730057                                                                                   | -0.2621 | 0.0131 |
| 234089_at   |           | CDNA FLJ12210 fis; clone MAMMA1000968                                                                            | -0.1525 | 0.0075 |
| 234102_at   | RASL11B   | RAS-like; family 11; member B                                                                                    | -0.102  | 0.0471 |
| 234109_x_at | ONECUT3   | one cut homeobox 3                                                                                               | -0.1228 | 0.0437 |
| 234115_s_at | C6orf12   | chromosome 6 open reading frame 12                                                                               | -0.1599 | 0.0059 |
| 234116_at   | CX40.1    | connexin40.1                                                                                                     | -0.2232 | 0.0068 |
| 234126_at   |           | MRNA; cDNA DKFZp761M1112 (from clone DKFZp761M1112)                                                              | -0.1223 | 0.0072 |
| 234128_at   |           | Clone HQ0670                                                                                                     | -0.1552 | 0.0066 |
| 234138_at   |           | CDNA FLJ13320 fis; clone OVARC1001611                                                                            | -0.1371 | 0.0136 |
| 234143_at   |           | CDNA FLJ24013 fis; clone LNG12005                                                                                | -0.2828 | 0.002  |



|             |           |                                                                                                 |         |        |
|-------------|-----------|-------------------------------------------------------------------------------------------------|---------|--------|
| 234156_at   |           | CDNA: FLJ23252 fis; clone COL04668                                                              | -0.2271 | 0.0102 |
| 234167_at   | MKI67IP   | MKI67 (FHA domain) interacting nucleolar phosphoprotein                                         | -0.1297 | 0.0019 |
| 234176_at   |           | CDNA: FLJ21224 fis; clone COL00694                                                              | -0.1101 | 0.0493 |
| 234191_at   | BCL2L14   | BCL2-like 14 (apoptosis facilitator)                                                            | -0.1484 | 0.0392 |
| 234195_at   |           | CDNA: FLJ22426 fis; clone HRC08780                                                              | -0.1199 | 0.0305 |
| 234206_at   |           | CDNA: FLJ21271 fis; clone COL01751                                                              | -0.1767 | 0.0387 |
| 234232_at   | KBTBD2    | kelch repeat and BTB (POZ) domain containing 2                                                  | -0.1781 | 0.0148 |
| 234233_s_at | KBTBD2    | kelch repeat and BTB (POZ) domain containing 2                                                  | -0.118  | 0.0191 |
| 234247_at   |           | MRNA; cDNA DKFZp761D1723 (from clone DKFZp761D1723)                                             | -0.1198 | 0.028  |
| 234264_at   |           | MRNA partial cDNA sequence from cDNA selection; DCR1-8.0                                        | -0.1192 | 0.0105 |
| 234271_at   | OTOP2     | otopetrin 2                                                                                     | -0.1142 | 0.0246 |
| 234273_at   |           | MRNA; cDNA DKFZp434M031 (from clone DKFZp434M031)                                               | -0.1922 | 0.0097 |
| 234284_at   | GNG8      | guanine nucleotide binding protein (G protein); gamma 8                                         | -0.3678 | 0.0016 |
| 234285_at   | SYNGAP1   | synaptic Ras GTPase activating protein 1 homolog (rat), zinc finger and BTB domain containing 9 | -0.2919 | 0.0064 |
| 234289_x_at |           |                                                                                                 | -0.1411 | 0.0273 |
| 234298_at   | LOC652231 | L1 protein                                                                                      | -0.1964 | 0.0059 |
| 234301_s_at |           | Neuroblastoma cDNA; clone:Nbla00136; full insert sequence                                       | -0.1084 | 0.0111 |
| 234309_at   | TTY7      | testis-specific transcript; Y-linked 7                                                          | -0.1095 | 0.0078 |
| 234310_s_at | SUSD2     | sushi domain containing 2                                                                       | -0.2973 | 0      |
| 234314_at   | C20orf74  | chromosome 20 open reading frame 74                                                             | -2.5974 | 0.0172 |
| 234318_x_at | NDOR1     | NADPH dependent diflavin oxidoreductase 1                                                       | -0.1434 | 0.0211 |
| 234324_at   | NHSL1     | NHS-like 1                                                                                      | -0.1392 | 0.0156 |
| 234327_at   |           | CDNA: FLJ22687 fis; clone HSI10991                                                              | -0.1752 | 0.0453 |
| 234329_at   | CLIC5     | chloride intracellular channel 5                                                                | -0.1178 | 0.0267 |
| 234338_s_at | ZBTB47    | zinc finger and BTB domain containing 47                                                        | -0.1847 | 0.0333 |
| 234339_s_at | GLTSCR2   | glioma tumor suppressor candidate region gene 2                                                 | -0.4453 | 0.0091 |
| 234353_at   | C19orf15  | chromosome 19 open reading frame 15                                                             | -0.1245 | 0.0346 |
| 234355_s_at | PTCHD2    | patched domain containing 2                                                                     | -0.1889 | 0.0036 |
| 234364_at   | IGL@      | Immunoglobulin lambda locus                                                                     | -0.1647 | 0.0051 |
| 234376_at   | MYCN      | v-myc myelocytomatosis viral related oncogene; neuroblastoma derived (avian)                    | -0.124  | 0.0169 |
| 234388_at   | LOC731848 | hypothetical protein LOC731848                                                                  | -0.1203 | 0.0221 |
| 234401_at   |           | TCR V-alpha w31                                                                                 | -0.1749 | 0.0418 |
| 234407_s_at | TRPC7     | transient receptor potential cation channel; subfamily C; member 7                              | -0.1097 | 0.0246 |

|             |            |                                                                                                                                               |         |        |
|-------------|------------|-----------------------------------------------------------------------------------------------------------------------------------------------|---------|--------|
| 234408_at   | IL17F      | interleukin 17F                                                                                                                               | -0.1161 | 0.0366 |
| 234417_at   |            | Mutant dystrophin                                                                                                                             | -0.2653 | 0.0003 |
| 234418_x_at | CD44       | CD44 molecule (Indian blood group)                                                                                                            | -0.154  | 0.0269 |
| 234422_at   |            |                                                                                                                                               | -0.1905 | 0.0049 |
| 234427_at   | TRA@       | T cell receptor alpha chain (TRCAV2S1-N-AJ41-C) mRNA; anti-melanoma cytotoxic T lymphocyte clone MU-45; -63; -79, T cell receptor alpha locus | -0.1841 | 0.0045 |
| 234430_at   | ANTXR1     | Anthrax toxin receptor 1                                                                                                                      | -0.108  | 0.0181 |
| 234454_at   |            |                                                                                                                                               | -0.1451 | 0.0133 |
| 234456_at   | TRAPPC4    | trafficking protein particle complex 4                                                                                                        | -0.1205 | 0.016  |
| 234458_at   | ANPEP      | Alanyl (membrane) aminopeptidase (aminopeptidase N; aminopeptidase M; microsomal aminopeptidase; CD13; p150)                                  | -0.1322 | 0.0174 |
| 234460_at   |            |                                                                                                                                               | -0.1481 | 0.002  |
| 234463_at   | LOC646701  | similar to developmental pluripotency associated 5                                                                                            | -0.1693 | 0.0239 |
| 234466_at   |            | MRNA; cDNA DKFZp547C074 (from clone DKFZp547C074)                                                                                             | -0.2295 | 0.02   |
| 234468_at   | hCG_401283 | hCG401283                                                                                                                                     | -0.1869 | 0.0196 |
| 234477_at   | IGHA1      | immunoglobulin heavy constant alpha 1                                                                                                         | -0.1221 | 0.0245 |
| 234482_at   |            |                                                                                                                                               | -0.164  | 0.0121 |
| 234483_at   | ACSS1      | acyl-CoA synthetase short-chain family member 1                                                                                               | -0.1148 | 0.0143 |
| 234485_at   | LOC340947  | hypothetical protein LOC732107, similar to eukaryotic translation initiation factor 3; subunit 6 interacting protein                          | -0.242  | 0.0258 |
| 234498_at   | LOC130951  | Hypothetical protein BC014602                                                                                                                 | -0.1518 | 0.0211 |
| 234502_at   |            | MRNA; cDNA DKFZp564D043 (from clone DKFZp564D043)                                                                                             | -0.1191 | 0.0277 |
| 234504_at   | SPAG4L     | sperm associated antigen 4-like                                                                                                               | -0.1039 | 0.0373 |
| 234508_at   |            |                                                                                                                                               | -0.2849 | 0.0059 |
| 234527_at   |            |                                                                                                                                               | -0.1356 | 0.0053 |
| 234534_at   |            | CDNA FLJ20100 fis; clone COL04648                                                                                                             | -0.1101 | 0.0494 |
| 234553_at   |            | CDNA FLJ20012 fis; clone ADKA03438                                                                                                            | -0.1762 | 0.0006 |
| 234554_at   | KCNK16     | potassium channel; subfamily K; member 16                                                                                                     | -0.1199 | 0.0075 |
| 234555_at   |            | CDNA FLJ20083 fis; clone COL03440                                                                                                             | -0.2416 | 0.0042 |
| 234556_at   |            | MRNA; cDNA DKFZp434P2450 (from clone DKFZp434P2450)                                                                                           | -0.1573 | 0.0195 |
| 234561_at   | SLC2A13    | solute carrier family 2 (facilitated glucose transporter); member 13                                                                          | -0.1319 | 0.0046 |
| 234566_at   |            | MRNA; cDNA DKFZp761E11121 (from clone DKFZp761E11121)                                                                                         | -0.1042 | 0.0263 |
| 234568_at   | SCAMP5     | Secretory carrier membrane protein 5                                                                                                          | -0.2612 | 0.0074 |
| 234575_at   | ZNF71      | zinc finger protein 71                                                                                                                        | -0.1455 | 0.0286 |

|             |           |                                                                                                              |         |        |
|-------------|-----------|--------------------------------------------------------------------------------------------------------------|---------|--------|
| 234576_at   | ANPEP     | Alanyl (membrane) aminopeptidase (aminopeptidase N; aminopeptidase M; microsomal aminopeptidase; CD13; p150) | -0.147  | 0.0011 |
| 234580_at   | TMEM106A  | Transmembrane protein 106A                                                                                   | -0.1749 | 0.0232 |
| 234591_at   |           | CDNA: FLJ21261 fis; clone COL01461                                                                           | -0.1775 | 0.0015 |
| 234594_at   | C14orf85  | chromosome 14 open reading frame 85                                                                          | -0.161  | 0.0163 |
| 234600_at   |           | CDNA: FLJ21209 fis; clone COL00396                                                                           | -0.1276 | 0.0262 |
| 234627_at   | FLJ21408  | hypothetical gene supported by AK025061                                                                      | -0.1207 | 0.0482 |
| 234670_at   |           | CDNA: FLJ23600 fis; clone LNG15477                                                                           | -0.1297 | 0.0138 |
| 234671_at   | KRTAP4-2  | keratin associated protein 4-2                                                                               | -0.1665 | 0.0292 |
| 234679_at   | KRTAP9-3  | keratin associated protein 9-3                                                                               | -0.1163 | 0.0135 |
| 234683_at   | KRTAP4-15 | keratin associated protein 4-15, keratin associated protein 4-6                                              | -0.142  | 0.0185 |
| 234696_at   | LOC138652 | similar to testicular serine protease 2                                                                      | -0.2326 | 0.0039 |
| 234705_at   |           | CATX-1                                                                                                       | -0.1377 | 0.011  |
| 234707_x_at | IGLV1-44  | immunoglobulin lambda variable 1-44                                                                          | -0.1456 | 0.0211 |
| 234722_x_at | OBP2A     | odorant binding protein 2A, odorant binding protein 2B                                                       | -0.1237 | 0.0461 |
| 234742_at   | SIRPG     | Signal-regulatory protein gamma                                                                              | -0.1699 | 0.0381 |
| 234743_at   | LIMD1     | LIM domains containing 1                                                                                     | -0.1121 | 0.0406 |
| 234745_at   |           | Clone IMAGE:111995; mRNA sequence                                                                            | -0.13   | 0.0185 |
| 234750_at   | CACNG8    | calcium channel; voltage-dependent; gamma subunit 8                                                          | -0.1155 | 0.0405 |
| 234754_at   | SLC37A1   | solute carrier family 37 (glycerol-3-phosphate transporter); member 1                                        | -0.1412 | 0.005  |
| 234757_at   |           | CDNA FLJ38091 fis; clone CTONG2026770                                                                        | -0.1201 | 0.0345 |
| 234766_at   | OR8D2     | olfactory receptor; family 8; subfamily D; member 2                                                          | -0.1396 | 0.0117 |
| 234770_at   |           |                                                                                                              | -0.2186 | 0.0006 |
| 234773_x_at |           | MRNA; cDNA DKFZp434A0226 (from clone DKFZp434A0226)                                                          | -0.163  | 0.0024 |
| 234784_at   |           |                                                                                                              | -0.1385 | 0.0029 |
| 234791_at   | GSX1      | GS homeobox 1                                                                                                | -0.1716 | 0.0251 |
| 234797_at   |           |                                                                                                              | -0.128  | 0.0359 |
| 234798_x_at | C20orf66  | chromosome 20 open reading frame 66                                                                          | -0.1415 | 0.0048 |
| 234822_at   |           | Pregnancy-induced hypertension syndrome-related protein (PIH1)                                               | -0.1162 | 0.019  |
| 234828_at   |           | MRNA; cDNA DKFZp434J0721 (from clone DKFZp434J0721)                                                          | -0.1895 | 0.0059 |
| 234829_at   | C20orf57  | chromosome 20 open reading frame 57                                                                          | -0.1508 | 0.0105 |
| 234832_at   | ANTXR1    | Anthrax toxin receptor 1                                                                                     | -0.241  | 0.0002 |
| 234834_at   |           |                                                                                                              | -0.1691 | 0.0052 |
| 234838_at   |           | Pregnancy-induced hypertension syndrome-related protein (PIH1)                                               | -0.1329 | 0.0265 |

|             |              |                                                                                                                                                     |         |        |
|-------------|--------------|-----------------------------------------------------------------------------------------------------------------------------------------------------|---------|--------|
| 234841_x_at | OBP2A        | odorant binding protein 2A, odorant binding protein 2B                                                                                              | -0.1081 | 0.0388 |
| 234847_at   | DKFZp434G179 | hypothetical protein DKFZp434G179                                                                                                                   | -0.1328 | 0.0131 |
| 234851_at   | IGL@         | Immunoglobulin lambda locus                                                                                                                         | -0.1396 | 0.0328 |
| 234865_at   | TRBC1        | (1.3) mRNA for T-cell receptor beta chain, T cell receptor beta constant 1, T-cell receptor rearranged beta-chain V-region (V-D-J) mRNA; clone ph15 | -0.1897 | 0.0016 |
| 234868_s_at | GFRA4        | GDNF family receptor alpha 4                                                                                                                        | -0.1279 | 0.0432 |
| 234874_at   | ATE1         | arginyltransferase 1                                                                                                                                | -0.1205 | 0.0053 |
| 234876_at   | COX6A1       | cytochrome c oxidase subunit VIa polypeptide 1                                                                                                      | -0.1374 | 0.0165 |
| 234877_x_at |              |                                                                                                                                                     | -0.1769 | 0.0043 |
| 234878_at   | ZC3H12B      | zinc finger CCCH-type containing 12B                                                                                                                | -0.1769 | 0.0294 |
| 234888_at   | CACHD1       | Cache domain containing 1                                                                                                                           | -0.1716 | 0.0293 |
| 234896_at   |              |                                                                                                                                                     | -0.1057 | 0.0369 |
| 234897_s_at | C6orf21      | chromosome 6 open reading frame 21                                                                                                                  | -0.1131 | 0.0254 |
| 234898_at   |              |                                                                                                                                                     | -0.1613 | 0.0456 |
| 234904_x_at | ELAVL4       | ELAV (embryonic lethal; abnormal vision; Drosophila)-like 4 (Hu antigen D)                                                                          | -0.1334 | 0.0074 |
| 234910_at   | RASAL2       | RAS protein activator like 2                                                                                                                        | -0.1683 | 0.0033 |
| 234936_s_at | KIAA1345     | KIAA1345 protein                                                                                                                                    | -0.7418 | 0.005  |
| 234943_at   | CSNK1E       | casein kinase 1; epsilon                                                                                                                            | -0.161  | 0.0383 |
| 234951_s_at | COL12A1      | collagen; type XII; alpha 1                                                                                                                         | -0.1319 | 0.0151 |
| 234952_s_at | KIAA1542     | CTD-binding SR-like protein rA9                                                                                                                     | -0.2302 | 0.0463 |
| 234961_at   |              |                                                                                                                                                     | -0.1039 | 0.027  |
| 234966_at   | KLK15        | kallikrein-related peptidase 15                                                                                                                     | -0.1317 | 0.0415 |
| 234971_x_at | PLCD3        | phospholipase C; delta 3                                                                                                                            | -0.3755 | 0.0063 |
| 234974_at   | GALM         | Galactose mutarotase (aldose 1-epimerase)                                                                                                           | -0.8929 | 0.0006 |
| 234980_at   | TMEM56       | transmembrane protein 56                                                                                                                            | -0.9467 | 0.041  |
| 234986_at   | GCLM         | glutamate-cysteine ligase; modifier subunit                                                                                                         | -1.1195 | 0.0002 |
| 234994_at   | KIAA1913     | KIAA1913                                                                                                                                            | -2.4214 | 0.0075 |
| 235001_at   | DNAJA5       | DnaJ homology subfamily A member 5                                                                                                                  | -0.1186 | 0.046  |
| 235010_at   | LOC729013    | hypothetical protein LOC729013                                                                                                                      | -1.3284 | 0.0038 |
| 235033_at   | NPEPL1       | Aminopeptidase-like 1                                                                                                                               | -0.5404 | 0.0477 |
| 235044_at   | CYYR1        | cysteine/tyrosine-rich 1                                                                                                                            | -2.6209 | 0.0001 |
| 235054_at   | NUDT16       | nudix (nucleoside diphosphate linked moiety X)-type motif 16                                                                                        | -0.7938 | 0.0087 |
| 235065_at   |              | Full length insert cDNA clone ZE05E03                                                                                                               | -1.5678 | 0.0003 |
| 235066_at   | MAP4         | microtubule-associated protein 4                                                                                                                    | -0.1217 | 0.0063 |
| 235072_s_at |              | Transcribed locus                                                                                                                                   | -0.9319 | 0.0004 |
| 235076_at   | CALCOCO2     | calcium binding and coiled-coil domain 2                                                                                                            | -1.0294 | 0      |

|             |          |                                                                                          |         |        |
|-------------|----------|------------------------------------------------------------------------------------------|---------|--------|
| 235086_at   | THBS1    | Thrombospondin 1                                                                         | -2.0826 | 0      |
| 235090_at   | ZNF710   | Zinc finger protein 710                                                                  | -0.1439 | 0.0093 |
| 235102_x_at |          | Transcribed locus                                                                        | -0.4419 | 0.0358 |
| 235108_at   |          | CDNA FLJ41679 fis; clone HCASM2003212                                                    | -1.9106 | 0.0038 |
| 235117_at   | CHAC2    | ChaC; cation transport regulator homolog 2 (E. coli)                                     | -0.9817 | 0.0235 |
| 235127_at   | PMP2     | peripheral myelin protein 2                                                              | -0.146  | 0.005  |
| 235129_at   | PPP1R1A  | protein phosphatase 1; regulatory (inhibitor) subunit 1A                                 | -0.2793 | 0.0018 |
| 235139_at   | GNGT2    | guanine nucleotide binding protein (G protein); gamma transducing activity polypeptide 2 | -0.2353 | 0.0151 |
| 235175_at   | GBP4     | guanylate binding protein 4                                                              | -0.4226 | 0.0234 |
| 235192_at   | TP53RK   | TP53 regulating kinase                                                                   | -0.4417 | 0.0289 |
| 235194_at   | TPCN2    | two pore segment channel 2                                                               | -0.2289 | 0.0019 |
| 235195_at   | FBXW2    | F-box and WD repeat domain containing 2                                                  | -1.0456 | 0.0032 |
| 235204_at   | COX15    | COX15 homolog; cytochrome c oxidase assembly protein (yeast)                             | -2.3272 | 0      |
| 235211_at   |          | Transcribed locus                                                                        | -0.6041 | 0.0001 |
| 235214_at   | C1orf190 | chromosome 1 open reading frame 190                                                      | -0.2115 | 0.0054 |
| 235225_at   | SCN2B    | sodium channel; voltage-gated; type II; beta                                             | -0.2372 | 0      |
| 235242_at   |          | CDNA FLJ41375 fis; clone BRCAN2007700                                                    | -0.9677 | 0.0183 |
| 235245_at   | TMEM92   | transmembrane protein 92                                                                 | -0.1995 | 0.0054 |
| 235248_at   | BTBD9    | BTB (POZ) domain containing 9                                                            | -0.5294 | 0.0001 |
| 235256_s_at | GALM     | galactose mutarotase (aldose 1-epimerase)                                                | -1.3238 | 0.0001 |
| 235269_at   | FAM83F   | family with sequence similarity 83; member F                                             | -0.1375 | 0.032  |
| 235276_at   | EPST11   | epithelial stromal interaction 1 (breast)                                                | -0.9192 | 0.0161 |
| 235277_at   | AMOTL1   | angiomin like 1                                                                          | -0.2019 | 0.013  |
| 235279_at   |          | CDNA FLJ25106 fis; clone CBR01467                                                        | -1.0383 | 0      |
| 235282_at   |          | CDNA clone IMAGE:5206119                                                                 | -0.4878 | 0.0294 |
| 235306_at   | GIMAP8   | GTPase; IMAP family member 8                                                             | -1.5697 | 0.0022 |
| 235307_at   | LMTK2    | lemur tyrosine kinase 2                                                                  | -0.1202 | 0.0167 |
| 235309_at   |          | CDNA clone IMAGE:4140029                                                                 | -0.9584 | 0.0186 |
| 235313_at   | NRAP     | nebulin-related anchoring protein                                                        | -0.1475 | 0.0176 |
| 235333_at   | B4GALT6  | UDP-Gal:betaGlcNAc beta 1;4-galactosyltransferase; polypeptide 6                         | -2.0228 | 0.0001 |
| 235335_at   | ABCA9    | ATP-binding cassette; sub-family A (ABC1); member 9                                      | -0.2211 | 0.0025 |
| 235342_at   | SPOCK3   | sparc/osteonectin; cwcv and kazal-like domains proteoglycan (testican) 3                 | -1.0146 | 0.0017 |
| 235349_at   | FAM82A   | family with sequence similarity 82; member A                                             | -1.8953 | 0.0001 |
| 235359_at   | LRRC33   | leucine rich repeat containing 33                                                        | -0.5746 | 0.007  |
| 235360_at   |          | CDNA clone IMAGE:30408657                                                                | -2.4837 | 0      |

|             |           |                                                                            |         |        |
|-------------|-----------|----------------------------------------------------------------------------|---------|--------|
| 235361_at   |           | Transcribed locus                                                          | -0.2747 | 0.0069 |
| 235367_at   | MYPN      | myopalladin                                                                | -0.236  | 0.0005 |
| 235371_at   | GLT8D4    | glycosyltransferase 8 domain containing 4                                  | -1.5775 | 0.0021 |
| 235381_at   |           | Homo sapiens; clone IMAGE:3457110; mRNA                                    | -0.573  | 0.0148 |
| 235392_at   |           | Transcribed locus                                                          | -2.3319 | 0      |
| 235403_at   |           | Transcribed locus                                                          | -0.1166 | 0.0357 |
| 235405_at   | GSTA4     | glutathione S-transferase A4                                               | -1.4603 | 0.0098 |
| 235407_at   |           | Transcribed locus                                                          | -0.8291 | 0.0002 |
| 235413_at   | GGCX      | gamma-glutamyl carboxylase                                                 | -0.8321 | 0.0001 |
| 235419_at   |           | Transcribed locus                                                          | -1.365  | 0.0194 |
| 235421_at   | MAP3K8    | CDNA clone IMAGE:4689481, Mitogen-activated protein kinase kinase kinase 8 | -1.1941 | 0.0059 |
| 235427_at   |           | Transcribed locus                                                          | -1.9712 | 0      |
| 235434_at   |           | CDNA FLJ30141 fis; clone BRACE2000148                                      | -1.9365 | 0.0007 |
| 235450_at   | FBXL4     | F-box and leucine-rich repeat protein 4                                    | -0.6857 | 0.0056 |
| 235454_at   | HNRPA2B1  | Heterogeneous nuclear ribonucleoprotein A2/B1                              | -0.1115 | 0.0123 |
| 235467_s_at | KCNC4     | potassium voltage-gated channel; Shaw-related subfamily; member 4          | -0.5298 | 0      |
| 235471_at   | C10orf72  | Chromosome 10 open reading frame 72                                        | -1.5286 | 0.0148 |
| 235477_at   |           | Transcribed locus                                                          | -0.177  | 0.0143 |
| 235492_at   | RNF217    | ring finger protein 217                                                    | -0.3795 | 0.024  |
| 235495_at   | CCDC97    | coiled-coil domain containing 97                                           | -0.1459 | 0.0023 |
| 235499_at   | ZNF775    | Zinc finger protein 775                                                    | -0.2234 | 0.005  |
| 235514_at   | SASP      | skin aspartic protease                                                     | -0.1846 | 0.0254 |
| 235521_at   | HOXA3     | homeobox A3                                                                | -0.5324 | 0.0114 |
| 235523_at   |           | Transcribed locus                                                          | -0.207  | 0.0007 |
| 235527_at   | LOC284214 | hypothetical protein LOC284214                                             | -2.1247 | 0      |
| 235546_at   | SPINT1    | Serine peptidase inhibitor; Kunitz type 1                                  | -0.1453 | 0.0359 |
| 235570_at   |           | CDNA FLJ36544 fis; clone TRACH2006378                                      | -2.7983 | 0      |
| 235578_at   | ABCC9     | ATP-binding cassette; sub-family C (CFTR/MRP); member 9                    | -0.1453 | 0.0032 |
| 235580_at   | ZNF141    | zinc finger protein 141                                                    | -2.6868 | 0      |
| 235583_at   | ILDR1     | immunoglobulin-like domain containing receptor 1                           | -0.3459 | 0.0006 |
| 235592_at   |           | CDNA FLJ36210 fis; clone THYMU2000155                                      | -2.1104 | 0.0012 |
| 235593_at   | ZEB2      | zinc finger E-box binding homeobox 2                                       | -3.349  | 0      |
| 235603_at   | HNRNPU    | heterogeneous nuclear ribonucleoprotein U (scaffold attachment factor A)   | -2.0073 | 0      |
| 235608_at   |           | Transcribed locus                                                          | -0.2242 | 0.0295 |
| 235616_at   | TSHZ2     | teashirt zinc finger homeobox 2                                            | -1.3825 | 0.0164 |

|             |           |                                                                            |         |        |
|-------------|-----------|----------------------------------------------------------------------------|---------|--------|
| 235630_at   |           | Transcribed locus                                                          | -0.1972 | 0.027  |
| 235636_at   |           | CDNA FLJ23896 fis; clone LNG15157                                          | -0.1045 | 0.0302 |
| 235639_at   |           | Transcribed locus                                                          | -0.527  | 0      |
| 235658_at   |           | Transcribed locus                                                          | -0.2715 | 0.0157 |
| 235660_at   |           | MRNA; cDNA DKFZp667E0114 (from clone DKFZp667E0114)                        | -0.4118 | 0.0094 |
| 235666_at   | ITGA8     | integrin; alpha 8                                                          | -2.293  | 0      |
| 235667_at   | LOC643783 | hypothetical LOC643783                                                     | -0.3853 | 0.003  |
| 235670_at   |           | Transcribed locus                                                          | -1.0808 | 0      |
| 235672_at   | MAP6      | microtubule-associated protein 6                                           | -0.4048 | 0.001  |
| 235703_at   | PLB1      | phospholipase B1                                                           | -0.2706 | 0.0194 |
| 235708_at   | KLB       | klotho beta                                                                | -0.1762 | 0.0181 |
| 235712_at   | GAS5      | Growth arrest-specific 5                                                   | -0.2366 | 0.0171 |
| 235724_at   | ACSS1     | Acyl-CoA synthetase short-chain family member 1                            | -0.2413 | 0.0092 |
| 235725_at   |           | Transcribed locus                                                          | -0.9887 | 0      |
| 235739_at   |           | Transcribed locus                                                          | -3.5922 | 0      |
| 235745_at   | ERN1      | endoplasmic reticulum to nucleus signaling 1                               | -4.1177 | 0      |
| 235746_s_at | PLA2R1    | phospholipase A2 receptor 1; 180kDa                                        | -0.8909 | 0.0001 |
| 235766_x_at |           | CDNA clone IMAGE:5745639                                                   | -1.009  | 0.0214 |
| 235768_at   | SH3RF2    | SH3 domain containing ring finger 2                                        | -0.1191 | 0.0117 |
| 235769_at   |           |                                                                            | -0.1281 | 0.0239 |
| 235772_at   |           | Transcribed locus                                                          | -0.6475 | 0.0004 |
| 235782_at   |           | Transcribed locus                                                          | -0.352  | 0.042  |
| 235791_x_at | CHD1      | chromodomain helicase DNA binding protein 1                                | -1.263  | 0      |
| 235797_x_at | LOC727754 | Similar to hemicentin 1                                                    | -0.1767 | 0.0343 |
| 235798_at   |           |                                                                            | -0.833  | 0.0052 |
| 235806_at   | CENTD3    | centaurin; delta 3                                                         | -0.1044 | 0.014  |
| 235821_at   |           | CDNA FLJ14388 fis; clone HEMBA1002716                                      | -1.5072 | 0.0014 |
| 235827_at   | MAP3K7IP1 | mitogen-activated protein kinase kinase kinase 7 interacting protein 1     | -0.1187 | 0.0206 |
| 235830_at   |           | Transcribed locus                                                          | -0.4047 | 0.0139 |
| 235834_at   | CALD1     | Caldesmon 1                                                                | -0.9579 | 0.0001 |
| 235837_at   |           | Transcribed locus                                                          | -0.7932 | 0.0001 |
| 235838_at   | NLGN2     | Neuroigin 2                                                                | -0.1199 | 0.0255 |
| 235841_at   |           | Full-length cDNA clone CS0DM006YA12 of Fetal liver of Homo sapiens (human) | -0.3422 | 0.0235 |
| 235848_x_at |           | Transcribed locus                                                          | -1.1227 | 0.0084 |
| 235855_at   |           | Transcribed locus                                                          | -0.2197 | 0.0242 |
| 235867_at   | GSTM3     | glutathione S-transferase M3 (brain)                                       | -1.0824 | 0.0162 |
| 235885_at   | P2RY12    | purinergic receptor P2Y; G-protein coupled; 12                             | -1.5626 | 0.0001 |

|             |              |                                                                                                                        |         |        |
|-------------|--------------|------------------------------------------------------------------------------------------------------------------------|---------|--------|
| 235887_at   |              | Transcribed locus                                                                                                      | -0.2968 | 0      |
| 235890_at   |              | Transcribed locus                                                                                                      | -0.6743 | 0.0002 |
| 235891_at   |              |                                                                                                                        | -0.3513 | 0.0054 |
| 235898_at   |              | Transcribed locus; strongly similar to XP_515434.1 hypothetical protein XP_515434 [Pan troglodytes]                    | -0.3141 | 0.0001 |
| 235906_at   | TAF10        | TAF10 RNA polymerase II; TATA box binding protein (TBP)-associated factor; 30kDa                                       | -0.1219 | 0.0416 |
| 235928_at   |              | Transcribed locus                                                                                                      | -0.4448 | 0.0021 |
| 235933_at   | RP11-93B14.6 | hypothetical protein FLJ32154                                                                                          | -0.1986 | 0.0005 |
| 235936_at   | LOC254559    | hypothetical protein LOC254559                                                                                         | -0.2413 | 0.0104 |
| 235938_at   |              | Transcribed locus                                                                                                      | -0.5699 | 0.0058 |
| 235962_at   |              | Transcribed locus                                                                                                      | -0.607  | 0      |
| 235964_x_at |              | Full-length cDNA clone CS0DI067YM20 of Placenta Cot 25-normalized of Homo sapiens (human)                              | -0.5742 | 0.0342 |
| 235972_at   | TMEM131      | transmembrane protein 131                                                                                              | -0.1518 | 0.0427 |
| 235977_at   | LONRF2       | LON peptidase N-terminal domain and ring finger 2                                                                      | -2.5528 | 0.0001 |
| 235978_at   | FABP4        | Fatty acid binding protein 4; adipocyte                                                                                | -1.0238 | 0.0037 |
| 235979_at   | C7           | complement component 7                                                                                                 | -3.0869 | 0      |
| 235980_at   | PIK3CA       | Phosphoinositide-3-kinase; catalytic; alpha polypeptide                                                                | -0.5001 | 0.0051 |
| 235981_at   | C8orf22      | chromosome 8 open reading frame 22                                                                                     | -0.1476 | 0.0017 |
| 235982_at   | FCRL1        | Fc receptor-like 1                                                                                                     | -0.1558 | 0.002  |
| 235990_at   |              | CDNA FLJ38836 fis; clone MESAN2002519; weakly similar to Mus musculus cell cycle checkpoint control protein Mrad9 gene | -0.2687 | 0.0349 |
| 235995_at   |              |                                                                                                                        | -0.1945 | 0.0034 |
| 236011_at   | FOXK1        | forkhead box K1                                                                                                        | -0.1007 | 0.0248 |
| 236024_at   | GPM6A        | glycoprotein M6A                                                                                                       | -0.2485 | 0.0002 |
| 236031_x_at | FREM1        | FRAS1 related extracellular matrix 1                                                                                   | -0.2202 | 0.02   |
| 236035_at   |              | Transcribed locus                                                                                                      | -0.484  | 0      |
| 236038_at   |              | Transcribed locus                                                                                                      | -2.2533 | 0.0004 |
| 236040_at   | XAGE3        | X antigen family; member 3                                                                                             | -0.1518 | 0.0025 |
| 236052_at   | LOC388610    | hypothetical LOC388610                                                                                                 | -0.1713 | 0.0105 |
| 236053_at   |              | CDNA FLJ43003 fis; clone BRTHA2013262                                                                                  | -0.2117 | 0.0127 |
| 236054_at   |              | Transcribed locus                                                                                                      | -0.234  | 0.0161 |
| 236063_at   |              | Transcribed locus                                                                                                      | -0.1372 | 0.0063 |
| 236082_at   | PHLDB3       | pleckstrin homology-like domain; family B; member 3                                                                    | -0.2948 | 0.0001 |
| 236084_at   |              | Transcribed locus                                                                                                      | -0.1791 | 0.0186 |
| 236086_at   |              | Transcribed locus                                                                                                      | -0.2031 | 0.0007 |



|           |           |                                                                                               |         |        |
|-----------|-----------|-----------------------------------------------------------------------------------------------|---------|--------|
| 236118_at | LOC728473 | hypothetical protein LOC728473                                                                | -1.928  | 0.0004 |
| 236123_at | ST7L      | Suppression of tumorigenicity 7 like                                                          | -0.5047 | 0.0001 |
| 236132_at |           |                                                                                               | -0.7465 | 0.0001 |
| 236137_at |           | Transcribed locus                                                                             | -0.1553 | 0.0189 |
| 236140_at | GCLM      | glutamate-cysteine ligase; modifier subunit                                                   | -0.6371 | 0.0035 |
| 236141_at | NBLA00301 | putative protein product of Nbla00301                                                         | -0.7111 | 0.0135 |
| 236150_at | LOC123688 | similar to RIKEN cDNA C630028N24 gene                                                         | -0.4037 | 0.0043 |
| 236154_at | QKI       | Quaking homolog; KH domain RNA binding (mouse)                                                | -0.3483 | 0.0253 |
| 236171_at | ATP2C2    | ATPase; Ca++ transporting; type 2C; member 2                                                  | -0.1463 | 0.0318 |
| 236176_at | LOC645757 | hypothetical LOC645757                                                                        | -0.2271 | 0.0087 |
| 236183_at | DYNC1H1   | dynein; cytoplasmic 1; heavy chain 1                                                          | -0.1027 | 0.0172 |
| 236184_at |           | Transcribed locus                                                                             | -0.3106 | 0.008  |
| 236191_at |           | Transcribed locus                                                                             | -0.2044 | 0.0185 |
| 236200_at | FAF1      | Fas (TNFRSF6) associated factor 1                                                             | -0.1965 | 0.0071 |
| 236211_at |           | Transcribed locus                                                                             | -0.1432 | 0.0018 |
| 236225_at | GGT6      | gamma-glutamyltransferase 6 homolog (rat)                                                     | -0.1952 | 0.0094 |
| 236231_at |           | Transcribed locus                                                                             | -0.2692 | 0.0051 |
| 236245_at | ODF3L1    | outer dense fiber of sperm tails 3-like 1                                                     | -0.1582 | 0.0008 |
| 236247_at | NSUN4     | NOL1/NOP2/Sun domain family; member 4                                                         | -1.0744 | 0      |
| 236260_at |           | Transcribed locus; moderately similar to XP_001104560.1 hypothetical protein [Macaca mulatta] | -0.1322 | 0.03   |
| 236273_at | NBPF1     | neuroblastoma breakpoint family; member 1                                                     | -1.3393 | 0.0243 |
| 236277_at |           | Primary neuroblastoma cDNA; clone:Nbla04246; full insert sequence                             | -0.2428 | 0.0485 |
| 236303_at |           |                                                                                               | -0.1274 | 0.012  |
| 236307_at |           | Transcribed locus                                                                             | -0.9361 | 0      |
| 236308_at | VSTM2A    | V-set and transmembrane domain containing 2A                                                  | -0.3204 | 0.0104 |
| 236313_at | CDKN2B    | cyclin-dependent kinase inhibitor 2B (p15; inhibits CDK4)                                     | -0.9905 | 0.0222 |
| 236323_at |           | Transcribed locus                                                                             | -0.173  | 0.0195 |
| 236335_at |           | CDNA clone IMAGE:5273964                                                                      | -1.2551 | 0.0052 |
| 236340_at |           | Transcribed locus; strongly similar to XP_001146557.1 hypothetical protein [Pan troglodytes]  | -0.1842 | 0.039  |
| 236344_at |           | Transcribed locus                                                                             | -0.2112 | 0.0011 |
| 236345_at |           | Transcribed locus                                                                             | -0.2112 | 0.0064 |
| 236350_at |           | Transcribed locus                                                                             | -0.4179 | 0.0031 |
| 236358_at |           |                                                                                               | -1.0188 | 0.0001 |
| 236359_at | SCN4B     | sodium channel; voltage-gated; type IV; beta                                                  | -2.1062 | 0      |

|             |           |                                                                                                                         |         |        |
|-------------|-----------|-------------------------------------------------------------------------------------------------------------------------|---------|--------|
| 236373_at   |           | Transcribed locus                                                                                                       | -0.1843 | 0.0311 |
| 236383_at   |           | Transcribed locus                                                                                                       | -2.0386 | 0.0015 |
| 236387_at   |           | Transcribed locus                                                                                                       | -0.1411 | 0.009  |
| 236394_at   |           |                                                                                                                         | -0.1497 | 0.0091 |
| 236396_at   |           | Transcribed locus                                                                                                       | -0.5055 | 0.0025 |
| 236401_at   |           | Full-length cDNA clone CS0DI016YI23 of Placenta Cot 25-normalized of Homo sapiens (human)                               | -0.3093 | 0.003  |
| 236406_at   | ZNF324B   | Zinc finger protein 324B                                                                                                | -0.1631 | 0.0021 |
| 236434_at   | PES1      | pescadillo homolog 1; containing BRCT domain (zebrafish)                                                                | -0.1851 | 0.0072 |
| 236440_at   |           | CDNA FLJ14325 fis; clone BRAMY2046871                                                                                   | -0.121  | 0.0318 |
| 236451_at   |           | CDNA FLJ14635 fis; clone NT2RP2001196                                                                                   | -0.1641 | 0.0129 |
| 236452_at   |           | Transcribed locus                                                                                                       | -0.1528 | 0.0151 |
| 236455_at   |           | Transcribed locus                                                                                                       | -0.1743 | 0.0064 |
| 236475_at   | MICAL2    | Microtubule associated monooxygenase; calponin and LIM domain containing 2                                              | -0.2455 | 0.0041 |
| 236479_at   |           |                                                                                                                         | -0.2049 | 0.006  |
| 236491_at   | BCL2L10   | BCL2-like 10 (apoptosis facilitator)                                                                                    | -0.2792 | 0.0228 |
| 236497_at   | LOC729683 | hypothetical protein LOC729683                                                                                          | -0.1451 | 0.0337 |
| 236504_x_at | C6orf52   | chromosome 6 open reading frame 52                                                                                      | -0.2592 | 0.0094 |
| 236515_at   |           | Transcribed locus; strongly similar to XP_529424.1 hypothetical protein XP_529424 [Pan troglodytes]                     | -0.8593 | 0      |
| 236516_at   |           |                                                                                                                         | -0.238  | 0.0054 |
| 236536_at   | GALNT13   | UDP-N-acetyl-alpha-D-galactosamine:polypeptide N-acetylgalactosaminyltransferase 13 (GalNAc-T13)                        | -0.307  | 0.0401 |
| 236541_at   | ARSA      | Arylsulfatase A                                                                                                         | -0.3138 | 0.0002 |
| 236547_at   |           |                                                                                                                         | -0.2031 | 0.0041 |
| 236548_at   | GIPC2     | GIPC PDZ domain containing family; member 2                                                                             | -3.8571 | 0      |
| 236554_x_at | TMC8      | transmembrane channel-like 8                                                                                            | -0.1537 | 0.027  |
| 236573_at   | MIB1      | Mindbomb homolog 1 (Drosophila)                                                                                         | -0.179  | 0.0068 |
| 236575_at   |           | CDNA clone IMAGE:4823793                                                                                                | -0.1323 | 0.0106 |
| 236583_at   |           | Transcribed locus                                                                                                       | -0.6769 | 0      |
| 236593_at   |           | Transcribed locus; strongly similar to XP_001097428.1 similar to putative membrane-bound dipeptidase 2 [Macaca mulatta] | -0.1713 | 0.0498 |
| 236594_at   | LLGL1     | lethal giant larvae homolog 1 (Drosophila)                                                                              | -0.5778 | 0.0001 |
| 236598_at   |           | CDNA FLJ14635 fis; clone NT2RP2001196                                                                                   | -0.1147 | 0.0409 |
| 236600_at   | SPG20     | spastic paraplegia 20 (Troyer syndrome)                                                                                 | -2.3997 | 0      |

|             |           |                                                                                                       |         |        |
|-------------|-----------|-------------------------------------------------------------------------------------------------------|---------|--------|
| 236601_at   |           | Transcribed locus                                                                                     | -0.1366 | 0.0354 |
| 236628_at   |           | Transcribed locus                                                                                     | -0.1501 | 0.0091 |
| 236629_at   | C1orf69   | chromosome 1 open reading frame 69                                                                    | -0.6902 | 0.0002 |
| 236632_at   | LOC646576 | hypothetical LOC646576                                                                                | -0.2662 | 0.0017 |
| 236640_at   | LOC399959 | Hypothetical gene supported by BX647608                                                               | -0.2546 | 0.0007 |
| 236644_at   | RNF180    | ring finger protein 180                                                                               | -0.5278 | 0.0105 |
| 236647_at   |           | Transcribed locus                                                                                     | -0.1261 | 0.0167 |
| 236656_s_at |           | Full length insert cDNA YI37C01                                                                       | -1.6863 | 0.0001 |
| 236657_at   |           | Full length insert cDNA YI37C01                                                                       | -0.2863 | 0.0158 |
| 236663_at   |           | Transcribed locus                                                                                     | -0.3352 | 0.0013 |
| 236669_at   |           | (clone 33) macronuclear mRNA                                                                          | -0.4638 | 0      |
| 236675_at   |           | MSTP075 (MST075)                                                                                      | -0.2929 | 0.0001 |
| 236677_at   | NGB       | neuroglobin                                                                                           | -0.3473 | 0.0007 |
| 236686_at   | MVK       | mevalonate kinase (mevalonic aciduria)                                                                | -0.2618 | 0.0072 |
| 236690_at   | RHBDD1    | Rhomboid domain containing 1                                                                          | -0.1833 | 0.0043 |
| 236694_at   | CYorf15A  | chromosome Y open reading frame 15A                                                                   | -2.6105 | 0.001  |
| 236713_at   | ACTR1A    | ARP1 actin-related protein 1 homolog A; centractin alpha (yeast)                                      | -0.1757 | 0.0271 |
| 236717_at   | LOC165186 | similar to RIKEN cDNA 4632412N22 gene                                                                 | -0.4218 | 0.0001 |
| 236730_at   | GIPC3     | GIPC PDZ domain containing family; member 3                                                           | -0.1131 | 0.0353 |
| 236753_at   | LOC154822 | hypothetical protein LOC154822                                                                        | -0.1704 | 0.0211 |
| 236760_at   | AMMECR1   | Alport syndrome; mental retardation; midface hypoplasia and elliptocytosis chromosomal region; gene 1 | -0.1965 | 0.0336 |
| 236770_at   | SUGT1L1   | SGT1; suppressor of G2 allele of SKP1 like 1 (S. cerevisiae)                                          | -0.274  | 0      |
| 236772_s_at |           | Transcribed locus                                                                                     | -0.805  | 0      |
| 236774_at   |           | Transcribed locus                                                                                     | -0.1769 | 0.0055 |
| 236775_s_at |           | Transcribed locus                                                                                     | -0.1765 | 0.015  |
| 236781_at   |           | Transcribed locus                                                                                     | -0.3781 | 0.0243 |
| 236784_s_at | LOC646808 | Hypothetical LOC646808                                                                                | -0.2849 | 0.022  |
| 236796_at   | BACH2     | BTB and CNC homology 1; basic leucine zipper transcription factor 2                                   | -0.9598 | 0.001  |
| 236797_at   |           | Transcribed locus                                                                                     | -0.279  | 0.0012 |
| 236798_at   |           | CDNA FLJ32438 fis; clone SKMUS2001402                                                                 | -0.6501 | 0.0365 |
| 236810_at   |           | Transcribed locus; moderately similar to XP_001087864.1 integrin; beta 7 [Macaca mulatta]             | -0.1166 | 0.0241 |
| 236812_at   |           |                                                                                                       | -0.1756 | 0.0049 |
| 236823_at   | IDS       | iduronate 2-sulfatase (Hunter syndrome)                                                               | -0.1065 | 0.0417 |
| 236836_at   |           | CDNA FLJ46538 fis; clone THYMU3037827                                                                 | -0.7244 | 0.009  |
| 236844_at   | DHX30     | DEAH (Asp-Glu-Ala-His) box polypeptide 30                                                             | -0.1434 | 0.0263 |

|             |           |                                                                                            |         |        |
|-------------|-----------|--------------------------------------------------------------------------------------------|---------|--------|
| 236889_at   |           | Transcribed locus                                                                          | -0.8699 | 0.0241 |
| 236893_at   | LOC404266 | Hypothetical LOC404266                                                                     | -0.1347 | 0.0266 |
| 236901_at   |           | Transcribed locus                                                                          | -1.0809 | 0      |
| 236909_at   | LOC129881 | hypothetical LOC129881                                                                     | -0.1354 | 0.0224 |
| 236922_at   |           | CDNA FLJ38215 fis; clone FCBBF2000291                                                      | -0.4009 | 0.0285 |
| 236927_at   | SVEP1     | sushi; von Willebrand factor type A; EGF and pentraxin domain containing 1                 | -0.3824 | 0.0001 |
| 236932_s_at | GATAD2A   | GATA zinc finger domain containing 2A                                                      | -0.131  | 0.0025 |
| 236934_at   |           | CDNA FLJ34654 fis; clone KIDNE2018294                                                      | -0.8785 | 0      |
| 236950_s_at | LOC157381 | hypothetical protein LOC157381                                                             | -0.1273 | 0.0224 |
| 236959_s_at |           | Transcribed locus                                                                          | -0.125  | 0.0391 |
| 236964_at   |           | Transcribed locus                                                                          | -0.1156 | 0.0444 |
| 236965_at   | UBQLNL    | ubiquilin-like                                                                             | -0.2355 | 0.0159 |
| 236973_at   |           | CDNA FLJ45218 fis; clone BRCAN2019653                                                      | -0.1142 | 0.0281 |
| 236975_at   |           | Transcribed locus                                                                          | -0.4099 | 0      |
| 236979_at   | C1orf178  | chromosome 1 open reading frame 178                                                        | -0.1363 | 0.0011 |
| 236988_x_at | ITGB2     | integrin; beta 2 (complement component 3 receptor 3 and 4 subunit)                         | -0.2883 | 0.0004 |
| 236991_at   |           | Transcribed locus                                                                          | -0.1717 | 0.0115 |
| 236996_at   |           | Transcribed locus                                                                          | -0.1787 | 0.0116 |
| 237002_at   | NCDN      | Neurochondrin                                                                              | -0.1142 | 0.0163 |
| 237004_at   |           | Transcribed locus                                                                          | -0.1618 | 0.0434 |
| 237016_at   | C6orf128  | chromosome 6 open reading frame 128                                                        | -0.5759 | 0.0345 |
| 237022_at   |           |                                                                                            | -0.1323 | 0.0065 |
| 237024_at   | C3orf45   | chromosome 3 open reading frame 45                                                         | -0.1351 | 0.0182 |
| 237025_at   |           | Transcribed locus                                                                          | -0.465  | 0.0004 |
| 237027_at   |           |                                                                                            | -0.1666 | 0.0285 |
| 237044_s_at |           |                                                                                            | -0.482  | 0.0447 |
| 237052_x_at |           |                                                                                            | -0.4088 | 0.0001 |
| 237055_at   |           | Transcribed locus; weakly similar to XP_524364.2 zinc finger protein 649 [Pan troglodytes] | -0.1773 | 0.0271 |
| 237056_at   | INSC      | inscuteable homolog (Drosophila)                                                           | -0.1433 | 0.0014 |
| 237068_at   |           | Transcribed locus                                                                          | -0.1677 | 0.0016 |
| 237073_at   |           |                                                                                            | -0.3723 | 0.0019 |
| 237078_at   |           | Transcribed locus                                                                          | -0.1008 | 0.0035 |
| 237081_at   |           | Transcribed locus                                                                          | -1.0095 | 0.0003 |
| 237089_at   |           |                                                                                            | -0.1582 | 0.0072 |
| 237090_at   |           | MRNA; cDNA DKFZp4341192 (from clone DKFZp4341192)                                          | -0.1276 | 0.0498 |
| 237091_at   |           |                                                                                            | -0.1544 | 0.0147 |

|             |           |                                                                                                                                                                                  |         |        |
|-------------|-----------|----------------------------------------------------------------------------------------------------------------------------------------------------------------------------------|---------|--------|
| 237093_at   |           |                                                                                                                                                                                  | -0.1742 | 0.0192 |
| 237108_x_at | FLJ42875  | FLJ42875 protein                                                                                                                                                                 | -0.324  | 0.0008 |
| 237111_at   |           |                                                                                                                                                                                  | -0.2008 | 0.0102 |
| 237112_at   |           |                                                                                                                                                                                  | -0.4076 | 0.0005 |
| 237115_at   |           | Transcribed locus; strongly similar to XP_530679.1 hypothetical protein XP_530679 [Pan troglodytes]                                                                              | -0.1467 | 0.0159 |
| 237127_at   |           | Transcribed locus                                                                                                                                                                | -0.7856 | 0      |
| 237128_at   |           | Transcribed locus                                                                                                                                                                | -0.1521 | 0.0147 |
| 237146_at   |           | Transcribed locus                                                                                                                                                                | -0.1503 | 0.0375 |
| 237154_at   |           | Transcribed locus                                                                                                                                                                | -1.2604 | 0      |
| 237166_at   |           | CDNA FLJ31536 fis; clone NT2RI2000689                                                                                                                                            | -0.135  | 0.003  |
| 237167_at   | KIAA1217  | KIAA1217                                                                                                                                                                         | -0.1545 | 0.0457 |
| 237170_at   |           |                                                                                                                                                                                  | -0.1392 | 0.0332 |
| 237172_at   |           | Transcribed locus                                                                                                                                                                | -0.167  | 0.0063 |
| 237176_at   |           | Transcribed locus                                                                                                                                                                | -0.2811 | 0.0215 |
| 237186_at   |           | MRNA; cDNA DKFZp779F2345 (from clone DKFZp779F2345)                                                                                                                              | -3.2803 | 0      |
| 237190_at   |           | CDNA FLJ38935 fis; clone NT2NE2014681                                                                                                                                            | -0.2488 | 0.0008 |
| 237191_x_at |           | Transcribed locus                                                                                                                                                                | -0.1253 | 0.0048 |
| 237192_at   |           | Full length insert cDNA clone ZD75H06                                                                                                                                            | -0.14   | 0.0053 |
| 237204_at   |           | Transcribed locus; weakly similar to XP_213396.4 similar to diphtheria toxin resistance protein required for diphthamide biosynthesis (Saccharomyces)-like 1 [Rattus norvegicus] | -1.6198 | 0      |
| 237235_at   |           | Transcribed locus                                                                                                                                                                | -0.1208 | 0.0103 |
| 237236_x_at | LOC731789 | similar to amyloid beta (A4) precursor protein-binding; family B; member 1 interacting protein                                                                                   | -0.1577 | 0.0069 |
| 237237_at   |           | Transcribed locus                                                                                                                                                                | -0.1792 | 0.0201 |
| 237252_at   | THBD      | thrombomodulin                                                                                                                                                                   | -0.3101 | 0.0393 |
| 237254_at   | SLC5A11   | solute carrier family 5 (sodium/glucose cotransporter); member 11                                                                                                                | -0.2708 | 0.0007 |
| 237255_at   |           |                                                                                                                                                                                  | -0.1873 | 0.0184 |
| 237262_at   |           | Full length insert cDNA clone ZE05E03                                                                                                                                            | -1.0625 | 0.001  |
| 237271_at   | LOC154872 | hypothetical LOC154872                                                                                                                                                           | -0.1381 | 0.0111 |
| 237274_at   |           | Transcribed locus                                                                                                                                                                | -0.2402 | 0.0309 |
| 237279_at   |           | Transcribed locus                                                                                                                                                                | -0.1535 | 0.0219 |
| 237280_at   | TCTE1     | t-complex-associated-testis-expressed 1                                                                                                                                          | -0.1849 | 0.0028 |
| 237283_at   |           | Transcribed locus                                                                                                                                                                | -0.2278 | 0.0123 |
| 237285_at   | SORBS2    | sorbin and SH3 domain containing 2                                                                                                                                               | -0.8941 | 0.0001 |
| 237288_at   | TGM7      | transglutaminase 7                                                                                                                                                               | -0.1453 | 0.0192 |

|             |           |                                                                                   |         |        |
|-------------|-----------|-----------------------------------------------------------------------------------|---------|--------|
| 237290_at   |           | Transcribed locus                                                                 | -0.4287 | 0.0135 |
| 237303_at   |           | Transcribed locus                                                                 | -0.1181 | 0.0243 |
| 237307_at   |           | Transcribed locus                                                                 | -0.2505 | 0.0014 |
| 237312_at   | LOC731477 | hypothetical protein LOC731477                                                    | -0.1586 | 0.0132 |
| 237313_at   |           | Homo sapiens; clone IMAGE:5225774; mRNA                                           | -1.103  | 0.0002 |
| 237329_at   |           | Transcribed locus                                                                 | -0.612  | 0      |
| 237342_at   | TOLLIP    | Toll interacting protein                                                          | -0.2635 | 0.0002 |
| 237345_at   |           |                                                                                   | -0.2398 | 0.0057 |
| 237349_at   | TSHR      | Thyroid stimulating hormone receptor                                              | -0.1212 | 0.0432 |
| 237350_at   | LOC143941 | similar to CDNA sequence BC021608                                                 | -0.2287 | 0.0133 |
| 237351_at   |           | CDNA clone IMAGE:5311297                                                          | -0.1318 | 0.0127 |
| 237355_at   |           | Transcribed locus                                                                 | -0.2458 | 0.0065 |
| 237358_at   |           |                                                                                   | -0.1805 | 0.0006 |
| 237359_at   |           | Transcribed locus                                                                 | -0.1392 | 0.0012 |
| 237360_at   | ACTRT2    | actin-related protein T2                                                          | -0.1794 | 0.0046 |
| 237366_at   |           |                                                                                   | -0.1269 | 0.0402 |
| 237378_at   | FLJ46321  | FLJ46321 protein                                                                  | -0.2021 | 0.0259 |
| 237380_at   | FBXO46    | F-box protein 46                                                                  | -0.207  | 0.0208 |
| 237394_at   |           | Transcribed locus                                                                 | -0.1336 | 0.0123 |
| 237395_at   | CYP4Z1    | cytochrome P450; family 4; subfamily Z; polypeptide 1                             | -0.1751 | 0.0002 |
| 237397_at   |           | Full length insert cDNA YQ55F05                                                   | -0.2181 | 0.002  |
| 237400_at   | ATP5S     | ATP synthase; H+ transporting; mitochondrial F0 complex; subunit s (factor B)     | -0.7572 | 0.0473 |
| 237401_at   | ACTN1     | Actinin; alpha 1                                                                  | -0.1852 | 0.0248 |
| 237403_at   | GFI1B     | growth factor independent 1B (potential regulator of CDKN1A; translocated in CML) | -0.1332 | 0.0297 |
| 237407_at   | HS1BP3    | HCLS1 binding protein 3                                                           | -0.2577 | 0.024  |
| 237408_at   |           | CDNA FLJ38454 fis; clone FEBRA2019690                                             | -0.5777 | 0      |
| 237413_at   |           | Transcribed locus                                                                 | -0.5311 | 0.0065 |
| 237420_at   |           |                                                                                   | -0.142  | 0.0155 |
| 237431_at   | LOC731851 | hypothetical protein LOC731851                                                    | -0.2258 | 0.001  |
| 237443_at   |           |                                                                                   | -0.1488 | 0.0021 |
| 237444_at   |           | Transcribed locus                                                                 | -0.4905 | 0.0005 |
| 237451_x_at |           | Transcribed locus                                                                 | -0.9882 | 0      |
| 237453_at   | ZNF529    | Zinc finger protein 529                                                           | -0.1245 | 0.0098 |
| 237460_x_at | LOC283551 | hypothetical protein LOC283551                                                    | -2.4227 | 0      |
| 237465_at   | USP53     | ubiquitin specific peptidase 53                                                   | -1.5722 | 0      |
| 237466_s_at | HHIP      | hedgehog interacting protein                                                      | -0.7971 | 0.0011 |
| 237476_at   |           | Transcribed locus                                                                 | -0.2352 | 0.0096 |

|           |           |                                                                                               |         |        |
|-----------|-----------|-----------------------------------------------------------------------------------------------|---------|--------|
| 237484_at | LOC440087 | hypothetical gene supported by AK092637                                                       | -0.172  | 0.0156 |
| 237494_at |           | Transcribed locus                                                                             | -0.251  | 0.0454 |
| 237496_at |           |                                                                                               | -1.9517 | 0      |
| 237497_at |           | Transcribed locus                                                                             | -0.2279 | 0.0083 |
| 237500_at |           | Transcribed locus                                                                             | -0.1995 | 0.0095 |
| 237501_at |           | CDNA FLJ37024 fis; clone BRACE2010837                                                         | -0.1207 | 0.0117 |
| 237508_at |           |                                                                                               | -0.1195 | 0.0094 |
| 237513_at | TRY1      | trypsin X3                                                                                    | -0.159  | 0.011  |
| 237515_at | TMEM56    | transmembrane protein 56                                                                      | -1.5718 | 0.0002 |
| 237529_at |           | CDNA clone IMAGE:4825924                                                                      | -0.1681 | 0.006  |
| 237536_at |           | CDNA clone IMAGE:4819956                                                                      | -0.3366 | 0.0037 |
| 237547_at |           |                                                                                               | -0.1221 | 0.0202 |
| 237550_at |           | Transcribed locus                                                                             | -0.1056 | 0.0449 |
| 237584_at |           | Transcribed locus                                                                             | -0.1283 | 0.0116 |
| 237590_at |           |                                                                                               | -0.1693 | 0.008  |
| 237592_at | C6orf94   | chromosome 6 open reading frame 94                                                            | -0.1184 | 0.0292 |
| 237595_at | LMX1A     | LIM homeobox transcription factor 1; alpha                                                    | -0.1363 | 0.0347 |
| 237603_at | C1orf100  | chromosome 1 open reading frame 100                                                           | -0.1659 | 0.0137 |
| 237604_at | BC038740  | BC038740                                                                                      | -0.1721 | 0.0192 |
| 237610_at | LOC643194 | hypothetical LOC643194                                                                        | -0.1142 | 0.0328 |
| 237612_at |           | Transcribed locus                                                                             | -0.19   | 0.0019 |
| 237617_at |           | Transcribed locus; moderately similar to XP_001085521.1 hypothetical protein [Macaca mulatta] | -0.1251 | 0.0012 |
| 237622_at |           | Transcribed locus                                                                             | -1.0911 | 0.0009 |
| 237627_at |           | Transcribed locus                                                                             | -0.2293 | 0.0146 |
| 237631_at |           | Transcribed locus                                                                             | -0.1152 | 0.0344 |
| 237638_at |           |                                                                                               | -0.1495 | 0.0052 |
| 237639_at | UNQ846    | SRSR846                                                                                       | -0.1683 | 0.017  |
| 237643_at |           | Transcribed locus                                                                             | -0.497  | 0      |
| 237656_at | WWC2      | WW and C2 domain containing 2                                                                 | -0.1134 | 0.0221 |
| 237657_at |           |                                                                                               | -0.1367 | 0.0428 |
| 237661_at |           | Transcribed locus                                                                             | -0.1262 | 0.0287 |
| 237674_at |           | Transcribed locus                                                                             | -0.1174 | 0.0151 |
| 237676_at |           | Transcribed locus                                                                             | -0.115  | 0.0443 |
| 237685_at | LOC339760 | hypothetical LOC339760, hypothetical protein LOC651281                                        | -0.1809 | 0.0005 |
| 237694_at |           | Transcribed locus                                                                             | -0.1519 | 0.0095 |
| 237704_at |           | Transcribed locus                                                                             | -0.1394 | 0.0187 |
| 237706_at | STXBP4    | Syntaxin binding protein 4                                                                    | -0.3629 | 0.0063 |
| 237714_at |           | Transcribed locus                                                                             | -0.1885 | 0.0014 |

|             |           |                                                                     |         |        |
|-------------|-----------|---------------------------------------------------------------------|---------|--------|
| 237718_at   | EIF4E     | eukaryotic translation initiation factor 4E                         | -0.693  | 0      |
| 237731_at   | LOC154092 | hypothetical protein LOC154092                                      | -0.1329 | 0.0226 |
| 237734_s_at |           | CDNA clone IMAGE:5296164                                            | -0.1526 | 0.0071 |
| 237738_at   |           | CDNA clone IMAGE:5742524                                            | -0.1361 | 0.0061 |
| 237740_at   |           | Transcribed locus                                                   | -0.1765 | 0.0101 |
| 237742_at   |           | Transcribed locus                                                   | -0.1442 | 0.0353 |
| 237744_at   |           |                                                                     | -0.244  | 0.0028 |
| 237754_at   |           | CDNA FLJ32805 fis; clone TESTI2002690                               | -0.1626 | 0.0018 |
| 237755_s_at | WDR16     | WD repeat domain 16                                                 | -0.1081 | 0.0284 |
| 237757_at   |           | Transcribed locus                                                   | -0.1267 | 0.027  |
| 237765_at   | C14orf68  | chromosome 14 open reading frame 68                                 | -0.1289 | 0.0244 |
| 237780_at   |           | Transcribed locus                                                   | -0.122  | 0.0434 |
| 237781_at   | HORMAD2   | HORMA domain containing 2                                           | -0.1191 | 0.0235 |
| 237801_at   |           |                                                                     | -0.161  | 0.0279 |
| 237811_at   |           | Transcribed locus                                                   | -0.1197 | 0.0162 |
| 237818_at   |           | Transcribed locus                                                   | -0.1938 | 0.0002 |
| 237822_at   |           | Transcribed locus                                                   | -0.1205 | 0.0358 |
| 237824_at   |           | Transcribed locus                                                   | -0.116  | 0.0346 |
| 237847_at   | NTN1      | Netrin 1                                                            | -0.1716 | 0.0175 |
| 237849_at   |           | Transcribed locus                                                   | -2.3589 | 0      |
| 237855_at   | ZNF777    | zinc finger protein 777                                             | -0.1937 | 0.0284 |
| 237861_at   | LOC729556 | hypothetical protein LOC729556                                      | -0.153  | 0.0436 |
| 237881_at   |           | Transcribed locus                                                   | -0.8928 | 0.0006 |
| 237887_at   |           |                                                                     | -0.2618 | 0.001  |
| 237894_at   | C3orf22   | chromosome 3 open reading frame 22                                  | -0.1034 | 0.043  |
| 237896_at   | NODAL     | nodal homolog (mouse)                                               | -0.1096 | 0.0075 |
| 237900_at   | KLHDC4    | kelch domain containing 4                                           | -0.2196 | 0.0001 |
| 237904_at   |           | Transcribed locus                                                   | -0.5992 | 0      |
| 237914_s_at |           | Transcribed locus                                                   | -0.1393 | 0.015  |
| 237925_at   |           | Transcribed locus                                                   | -0.1484 | 0.0138 |
| 237929_at   | C17orf50  | chromosome 17 open reading frame 50                                 | -0.1079 | 0.0142 |
| 237935_at   |           | Transcribed locus                                                   | -0.1677 | 0.0088 |
| 237940_s_at |           | Transcribed locus                                                   | -0.2157 | 0.0023 |
| 237960_at   |           |                                                                     | -0.1285 | 0.0083 |
| 237970_at   |           |                                                                     | -0.1396 | 0.039  |
| 237994_at   |           | Transcribed locus                                                   | -0.132  | 0.0281 |
| 238003_at   | HEPACAM   | cancer susceptibility gene HEPN1, hepatocyte cell adhesion molecule | -0.224  | 0.0021 |



|             |             |                                                                                                                                            |         |        |
|-------------|-------------|--------------------------------------------------------------------------------------------------------------------------------------------|---------|--------|
| 238007_at   |             | Transcribed locus; moderately similar to XP_001099461.1 similar to pyrroline-5-carboxylate synthetase isoform 2 isoform 2 [Macaca mulatta] | -0.8471 | 0      |
| 238017_at   | RDHE2       | epidermal retinal dehydrogenase 2                                                                                                          | -0.1284 | 0.0258 |
| 238018_at   | hCG_1990170 | hypothetical protein LOC285016                                                                                                             | -1.6281 | 0.0197 |
| 238026_at   | RPL35A      | ribosomal protein L35a                                                                                                                     | -0.7798 | 0      |
| 238035_at   | SP3         | Sp3 transcription factor                                                                                                                   | -0.5453 | 0.0433 |
| 238036_at   | SHE         | Src homology 2 domain containing E                                                                                                         | -0.8455 | 0      |
| 238041_at   |             | Transcribed locus                                                                                                                          | -0.3985 | 0.0057 |
| 238048_at   | CLASP2      | Cytoplasmic linker associated protein 2                                                                                                    | -0.1163 | 0.0073 |
| 238049_at   | GRAMD3      | GRAM domain containing 3                                                                                                                   | -1.1963 | 0      |
| 238050_at   |             | Transcribed locus                                                                                                                          | -0.2762 | 0.0004 |
| 238053_at   | DHRX        | dehydrogenase/reductase (SDR family) X-linked                                                                                              | -0.5739 | 0.0004 |
| 238062_at   | LOC338328   | high density lipoprotein-binding protein                                                                                                   | -0.5928 | 0.0037 |
| 238067_at   | TBC1D8B     | TBC1 domain family; member 8B (with GRAM domain)                                                                                           | -1.5178 | 0.0003 |
| 238073_at   |             |                                                                                                                                            | -0.3058 | 0.0205 |
| 238084_at   | PCGF3       | polycomb group ring finger 3                                                                                                               | -0.6138 | 0.0001 |
| 238087_at   | RTCD1       | RNA terminal phosphate cyclase domain 1                                                                                                    | -0.2314 | 0.0438 |
| 238088_at   |             | CDNA clone IMAGE:5259414                                                                                                                   | -0.1841 | 0.008  |
| 238091_at   |             | CDNA clone IMAGE:5200118                                                                                                                   | -2.4773 | 0      |
| 238092_at   |             | Transcribed locus                                                                                                                          | -0.2941 | 0.0046 |
| 238095_at   | GATA5       | GATA binding protein 5                                                                                                                     | -0.3395 | 0.0002 |
| 238100_at   | AAK1        | AP2 associated kinase 1                                                                                                                    | -0.2236 | 0.0033 |
| 238102_s_at | LOC149478   | Hypothetical protein LOC149478                                                                                                             | -0.1672 | 0.0388 |
| 238106_at   |             | Transcribed locus                                                                                                                          | -2.0054 | 0      |
| 238112_at   | LOC283177   | hypothetical protein LOC283177                                                                                                             | -0.1595 | 0.0142 |
| 238121_at   | GK5         | glycerol kinase 5 (putative)                                                                                                               | -1.7198 | 0      |
| 238134_at   |             |                                                                                                                                            | -0.1351 | 0.0279 |
| 238152_at   | MGC3032     | hypothetical protein MGC3032                                                                                                               | -0.1347 | 0.0169 |
| 238153_at   | PDE6B       | phosphodiesterase 6B; cGMP-specific; rod; beta (congenital stationary night blindness 3; autosomal dominant)                               | -0.1698 | 0.039  |
| 238157_at   |             | Transcribed locus                                                                                                                          | -0.1335 | 0.0468 |
| 238165_at   | PDZRN3      | PDZ domain containing RING finger 3                                                                                                        | -0.5135 | 0.0071 |
| 238169_at   |             | Transcribed locus                                                                                                                          | -0.4712 | 0.0139 |
| 238178_at   |             | Transcribed locus                                                                                                                          | -1.3997 | 0      |
| 238187_at   | C2orf57     | chromosome 2 open reading frame 57                                                                                                         | -0.1968 | 0.0008 |
| 238197_at   | GATA5       | GATA binding protein 5                                                                                                                     | -0.8501 | 0.0002 |
| 238201_at   |             | Transcribed locus                                                                                                                          | -0.2118 | 0.0013 |

|             |           |                                                                                                               |         |        |
|-------------|-----------|---------------------------------------------------------------------------------------------------------------|---------|--------|
| 238203_at   |           |                                                                                                               | -0.1205 | 0.0086 |
| 238206_at   |           | Transcribed locus                                                                                             | -2.9396 | 0      |
| 238215_at   | SLC6A18   | solute carrier family 6; member 18                                                                            | -0.1864 | 0.0094 |
| 238222_at   | GKN2      | gastrokine 2                                                                                                  | -0.1585 | 0.0124 |
| 238223_at   |           | Transcribed locus                                                                                             | -0.1985 | 0.0016 |
| 238228_at   |           |                                                                                                               | -0.4759 | 0.0059 |
| 238233_at   |           | Transcribed locus                                                                                             | -0.1097 | 0.0243 |
| 238242_at   |           | CDNA FLJ45493 fis; clone BRTHA2008598                                                                         | -0.2237 | 0.0442 |
| 238249_at   |           | Transcribed locus                                                                                             | -0.1848 | 0.0031 |
| 238250_at   |           | Transcribed locus                                                                                             | -0.1353 | 0.0124 |
| 238255_at   |           |                                                                                                               | -0.1678 | 0.0403 |
| 238275_at   | HAP1      | huntingtin-associated protein 1 (neuroan 1)                                                                   | -0.1945 | 0.0094 |
| 238284_at   |           | Transcribed locus; strongly similar to XP_001156258.1 hypothetical protein [Pan troglodytes]                  | -0.1125 | 0.04   |
| 238288_at   |           | Transcribed locus                                                                                             | -0.1302 | 0.018  |
| 238300_s_at | DAZAP2    | DAZ associated protein 2                                                                                      | -0.1744 | 0.0485 |
| 238310_at   |           |                                                                                                               | -0.1693 | 0.0106 |
| 238319_at   | LOC641912 | hypothetical LOC644090, hypothetical protein LOC641912                                                        | -0.264  | 0.0006 |
| 238329_at   | M-RIP     | Myosin phosphatase-Rho interacting protein                                                                    | -0.2908 | 0.003  |
| 238332_at   | ANKRD29   | ankyrin repeat domain 29                                                                                      | -1.5262 | 0.017  |
| 238338_at   |           | Transcribed locus                                                                                             | -0.1144 | 0.0464 |
| 238351_x_at |           | Transcribed locus                                                                                             | -0.1954 | 0.0045 |
| 238352_s_at |           | Transcribed locus                                                                                             | -0.1369 | 0.0115 |
| 238389_s_at |           | Transcribed locus; moderately similar to XP_001093747.1 tumor protein p53 binding protein; 2 [Macaca mulatta] | -1.1809 | 0.0015 |
| 238397_at   |           | Transcribed locus                                                                                             | -0.2331 | 0.0027 |
| 238399_x_at |           |                                                                                                               | -0.152  | 0.003  |
| 238415_at   |           | Transcribed locus                                                                                             | -0.1676 | 0.0073 |
| 238419_at   | PHLDB2    | pleckstrin homology-like domain; family B; member 2                                                           | -0.2891 | 0.0054 |
| 238431_at   |           | Transcribed locus                                                                                             | -1.0894 | 0.0009 |
| 238432_at   | FLJ35776  | hypothetical protein LOC649446                                                                                | -2.2211 | 0      |
| 238440_at   | CLYBL     | citrate lyase beta like                                                                                       | -1.8182 | 0      |
| 238447_at   | RBMS3     | RNA binding motif, single stranded interacting protein                                                        | -1.9976 | 0.0008 |
| 238467_at   |           | CDNA FLJ41419 fis; clone BRHIP2002339                                                                         | -0.7787 | 0.0488 |
| 238472_at   | FBXO9     | F-box protein 9                                                                                               | -1.5716 | 0      |
| 238480_at   | C18orf50  | Chromosome 18 open reading frame 50                                                                           | -2.6141 | 0.0001 |
| 238481_at   | MGP       | matrix Gla protein                                                                                            | -3.2941 | 0      |
| 238497_at   | TMEM136   | transmembrane protein 136                                                                                     | -1.0128 | 0.0017 |

|             |           |                                                                                                                                    |         |        |
|-------------|-----------|------------------------------------------------------------------------------------------------------------------------------------|---------|--------|
| 238498_at   |           | MRNA full length insert cDNA clone EUROIMAGE 1090207                                                                               | -0.3355 | 0.0001 |
| 238506_at   | LRR58     | leucine rich repeat containing 58                                                                                                  | -0.9647 | 0.0001 |
| 238507_at   |           | Transcribed locus                                                                                                                  | -0.268  | 0.0081 |
| 238512_at   |           | Transcribed locus                                                                                                                  | -0.3316 | 0.0106 |
| 238516_at   | BMP2      | bone morphogenetic protein receptor; type II (serine/threonine kinase)                                                             | -0.5525 | 0.0021 |
| 238518_x_at | GLYTK     | glycerate kinase                                                                                                                   | -0.2241 | 0.0335 |
| 238519_at   | DDI2      | DDI1; DNA-damage inducible 1; homolog 2 (S. cerevisiae)                                                                            | -0.9372 | 0.0008 |
| 238521_at   |           | Transcribed locus                                                                                                                  | -3.3841 | 0.0001 |
| 238524_at   |           |                                                                                                                                    | -0.2785 | 0.0487 |
| 238531_x_at |           | Transcribed locus; weakly similar to XP_001117086.1 similar to Olfactory receptor 10T2 (Olfactory receptor OR1-3) [Macaca mulatta] | -0.1598 | 0.0085 |
| 238544_at   |           | Transcribed locus                                                                                                                  | -0.5095 | 0.0004 |
| 238554_at   | CY5B      | cytochrome b5 type B (outer mitochondrial membrane)                                                                                | -1.1086 | 0.0159 |
| 238568_s_at |           | Transcribed locus                                                                                                                  | -2.6596 | 0      |
| 238569_at   | GABBR1    | Gamma-aminobutyric acid (GABA) B receptor; 1                                                                                       | -1.0607 | 0      |
| 238572_at   | MGC16211  | hypothetical protein MGC16211                                                                                                      | -0.3474 | 0      |
| 238573_at   |           | Transcribed locus                                                                                                                  | -0.463  | 0.0105 |
| 238576_at   |           | Homo sapiens; clone IMAGE:4414697; mRNA                                                                                            | -0.5856 | 0.0373 |
| 238577_s_at | TSHZ2     | Teashirt zinc finger homeobox 2                                                                                                    | -1.7502 | 0.0014 |
| 238597_at   | ANKRD13C  | Ankyrin repeat domain 13C                                                                                                          | -0.4725 | 0.002  |
| 238624_at   | NLK       | Nemo-like kinase                                                                                                                   | -1.5245 | 0.0033 |
| 238629_x_at |           | Transcribed locus; weakly similar to XP_001117086.1 similar to Olfactory receptor 10T2 (Olfactory receptor OR1-3) [Macaca mulatta] | -0.1304 | 0.0355 |
| 238633_at   | EPC1      | Enhancer of polycomb homolog 1 (Drosophila)                                                                                        | -0.4925 | 0      |
| 238638_at   | SLC37A2   | solute carrier family 37 (glycerol-3-phosphate transporter); member 2                                                              | -2.5246 | 0      |
| 238639_x_at | LOC730496 | hypothetical protein LOC730496                                                                                                     | -0.2456 | 0.0015 |
| 238640_at   |           | Transcribed locus                                                                                                                  | -0.4275 | 0      |
| 238641_at   | FLJ43806  | Hypothetical protein FLJ43806                                                                                                      | -0.1536 | 0.008  |
| 238647_at   | C14orf28  | chromosome 14 open reading frame 28                                                                                                | -0.3427 | 0.0394 |
| 238648_at   | FLJ42291  | hypothetical LOC346547                                                                                                             | -0.2085 | 0.0279 |
| 238659_at   |           | CDNA FLJ36185 fis; clone TESTI2026936                                                                                              | -0.2168 | 0.007  |
| 238668_at   |           | Transcribed locus                                                                                                                  | -1.0623 | 0.003  |
| 238674_at   |           | Transcribed locus                                                                                                                  | -0.1131 | 0.0308 |
| 238682_at   | CCDC96    | coiled-coil domain containing 96                                                                                                   | -0.559  | 0.0002 |
| 238709_at   |           | CDNA FLJ38461 fis; clone FEBRA2020977                                                                                              | -0.1599 | 0.0277 |
| 238747_at   |           | CDNA clone IMAGE:4796172                                                                                                           | -0.1309 | 0.0129 |

|             |           |                                                                                                                                                                                                 |         |        |
|-------------|-----------|-------------------------------------------------------------------------------------------------------------------------------------------------------------------------------------------------|---------|--------|
| 238751_at   |           | CDNA clone IMAGE:4791597                                                                                                                                                                        | -3.6038 | 0      |
| 238753_at   | FREQ      | frequenin homolog (Drosophila)                                                                                                                                                                  | -0.4864 | 0.0014 |
| 238758_at   |           | Transcribed locus                                                                                                                                                                               | -0.3454 | 0.0275 |
| 238762_at   | MTHFD2L   | methylenetetrahydrofolate dehydrogenase (NADP+ dependent) 2-like                                                                                                                                | -1.5658 | 0.0002 |
| 238776_x_at | OBSL1     | Obscurin-like 1                                                                                                                                                                                 | -0.2025 | 0.0054 |
| 238780_s_at |           | MRNA; cDNA DKFZp779F2345 (from clone DKFZp779F2345)                                                                                                                                             | -5.3413 | 0      |
| 238798_at   | TAPT1     | transmembrane anterior posterior transformation 1                                                                                                                                               | -0.4141 | 0.0189 |
| 238824_at   |           | CDNA FLJ30581 fis; clone BRAWH2007069                                                                                                                                                           | -0.5089 | 0.0154 |
| 238825_at   | ACRC      | acidic repeat containing                                                                                                                                                                        | -1.5363 | 0.0177 |
| 238835_at   |           | Transcribed locus                                                                                                                                                                               | -6.0925 | 0      |
| 238846_at   | TNFRSF11A | tumor necrosis factor receptor superfamily; member 11a; NFKB activator                                                                                                                          | -0.9063 | 0.0069 |
| 238872_at   |           | CDNA FLJ43312 fis; clone NT2RI2012659                                                                                                                                                           | -0.1561 | 0.0022 |
| 238873_at   |           | Transcribed locus                                                                                                                                                                               | -0.3793 | 0      |
| 238904_at   |           | MRNA; cDNA DKFZp547A0515 (from clone DKFZp547A0515)                                                                                                                                             | -0.1757 | 0.035  |
| 238914_at   |           | Transcribed locus                                                                                                                                                                               | -0.2133 | 0.0004 |
| 238919_at   |           | Full-length cDNA clone CS0DF024YN04 of Fetal brain of Homo sapiens (human)                                                                                                                      | -1.348  | 0.0093 |
| 238933_at   | IRS1      | Insulin receptor substrate 1                                                                                                                                                                    | -2.7484 | 0      |
| 238935_at   | RPS27L    | ribosomal protein S27-like                                                                                                                                                                      | -0.828  | 0.0074 |
| 238974_at   | FLJ38973  | hypothetical protein FLJ38973                                                                                                                                                                   | -0.5168 | 0      |
| 238979_at   |           | Transcribed locus; strongly similar to XP_507970.1 similar to Hermansky-Pudlak syndrome 1 protein isoform a; Hermansky-Pudlak syndrome gene; Hermansky-Pudlak syndrome type 1 [Pan troglodytes] | -0.1904 | 0.0064 |
| 238987_at   | B4GALT1   | UDP-Gal:betaGlcNAc beta 1;4-galactosyltransferase; polypeptide 1                                                                                                                                | -1.8898 | 0      |
| 238989_at   | C1GALT1C1 | C1GALT1-specific chaperone 1                                                                                                                                                                    | -1.0706 | 0      |
| 238998_x_at | OTUD1     | OTU domain containing 1                                                                                                                                                                         | -0.1611 | 0.0009 |
| 239001_at   | MGST1     | Microsomal glutathione S-transferase 1                                                                                                                                                          | -1.8068 | 0.0119 |
| 239009_at   | KIAA0754  | hypothetical LOC643314                                                                                                                                                                          | -0.1159 | 0.032  |
| 239023_at   |           | CDNA FLJ30352 fis; clone BRACE2007646                                                                                                                                                           | -0.2221 | 0.0094 |
| 239030_at   |           |                                                                                                                                                                                                 | -0.1309 | 0.0155 |
| 239033_at   |           | MRNA; cDNA DKFZp666M079 (from clone DKFZp666M079)                                                                                                                                               | -1.6255 | 0.0017 |
| 239037_at   | GNAS      | GNAS complex locus                                                                                                                                                                              | -0.11   | 0.0047 |
| 239045_at   |           | Transcribed locus                                                                                                                                                                               | -2.3691 | 0      |
| 239053_at   | CIAO1     | Cytosolic iron-sulfur protein assembly 1 homolog (S. cerevisiae)                                                                                                                                | -0.2838 | 0.0298 |
| 239057_at   | LMOD2     | leiomodoin 2 (cardiac)                                                                                                                                                                          | -0.1313 | 0.0262 |

|             |           |                                                                                                                    |         |        |
|-------------|-----------|--------------------------------------------------------------------------------------------------------------------|---------|--------|
| 239058_at   |           | Transcribed locus                                                                                                  | -0.5368 | 0.0029 |
| 239059_at   | DNAH1     | dynein; axonemal; heavy chain 1                                                                                    | -0.1743 | 0.0012 |
| 239060_at   |           | Transcribed locus                                                                                                  | -0.2813 | 0.0161 |
| 239062_at   |           | CDNA clone IMAGE:5286005                                                                                           | -0.1579 | 0.0038 |
| 239064_at   |           | CDNA FLJ36582 fis; clone TRACH2013081                                                                              | -0.2759 | 0.0061 |
| 239066_at   |           | Transcribed locus                                                                                                  | -1.9394 | 0.0015 |
| 239068_at   | LOC285831 | hypothetical protein LOC285831                                                                                     | -0.2208 | 0.0023 |
| 239085_at   |           | Transcribed locus                                                                                                  | -0.1704 | 0.0389 |
| 239089_at   |           | Transcribed locus                                                                                                  | -0.3692 | 0      |
| 239094_at   | LOC730961 | hypothetical protein LOC730961                                                                                     | -0.1767 | 0.033  |
| 239105_at   |           | Transcribed locus                                                                                                  | -3.5347 | 0      |
| 239118_at   | KCNA2     | potassium voltage-gated channel; shaker-related subfamily; member 2                                                | -0.2034 | 0.0029 |
| 239119_at   | DNAJC3    | DnaJ (Hsp40) homolog; subfamily C; member 3                                                                        | -0.1422 | 0.0367 |
| 239120_at   |           | CDNA FLJ38312 fis; clone FCBBF3021506                                                                              | -0.2135 | 0.0057 |
| 239138_at   |           | CDNA clone IMAGE:4797099                                                                                           | -0.5039 | 0      |
| 239148_at   | MARVELD3  | MARVEL domain containing 3                                                                                         | -0.1308 | 0.0254 |
| 239161_at   | FDX1      | ferredoxin 1                                                                                                       | -1.5415 | 0.0066 |
| 239172_x_at | MDFIC     | MyoD family inhibitor domain containing                                                                            | -0.1057 | 0.0388 |
| 239178_at   | FGF9      | fibroblast growth factor 9 (glia-activating factor)                                                                | -1.4537 | 0.0196 |
| 239183_at   | ANGPTL1   | angiopoietin-like 1                                                                                                | -2.7205 | 0      |
| 239185_at   | ABCA9     | ATP-binding cassette; sub-family A (ABC1); member 9                                                                | -0.2112 | 0.0013 |
| 239217_x_at | ABCC3     | ATP-binding cassette; sub-family C (CFTR/MRP); member 3                                                            | -1.5766 | 0      |
| 239218_at   |           | CDNA FLJ43039 fis; clone BRTHA3003023                                                                              | -0.3473 | 0.0001 |
| 239221_at   | GPR123    | G protein-coupled receptor 123                                                                                     | -0.2545 | 0.0012 |
| 239232_at   | MSI2      | Musashi homolog 2 (Drosophila)                                                                                     | -1.0897 | 0.0008 |
| 239267_at   | NEK6      | NIMA (never in mitosis gene a)-related kinase 6                                                                    | -0.1476 | 0.0295 |
| 239270_at   | PLCXD3    | phosphatidylinositol-specific phospholipase C; X domain containing 3                                               | -2.6493 | 0.0005 |
| 239272_at   | MMP28     | matrix metalloproteinase 28                                                                                        | -0.2943 | 0.0065 |
| 239273_s_at | MMP28     | matrix metalloproteinase 28                                                                                        | -0.2774 | 0.0013 |
| 239275_at   | FRMPD2    | FERM and PDZ domain containing 2, FERM and PDZ domain containing 2 like 1, FERM and PDZ domain containing 2 like 2 | -0.1455 | 0.0009 |
| 239276_at   |           | Transcribed locus                                                                                                  | -0.1522 | 0.0076 |
| 239277_at   |           |                                                                                                                    | -0.5689 | 0.007  |
| 239283_at   | TMED5     | transmembrane emp24 protein transport domain containing 5                                                          | -1.2643 | 0      |
| 239294_at   |           | Transcribed locus                                                                                                  | -0.799  | 0.0144 |
| 239296_at   |           | Transcribed locus                                                                                                  | -1.2943 | 0.001  |

|             |          |                                                                     |         |        |
|-------------|----------|---------------------------------------------------------------------|---------|--------|
| 239299_at   | DDI1     | DDI1; DNA-damage inducible 1; homolog 1 (S. cerevisiae)             | -0.1076 | 0.0211 |
| 239305_at   |          | Transcribed locus                                                   | -0.3873 | 0.0001 |
| 239317_at   | CEACAM21 | carcinoembryonic antigen-related cell adhesion molecule 21          | -0.1001 | 0.0328 |
| 239336_at   | THBS1    | Thrombospondin 1                                                    | -0.8486 | 0      |
| 239341_at   |          |                                                                     | -0.2373 | 0.0025 |
| 239345_at   | SLC19A3  | solute carrier family 19; member 3                                  | -0.1476 | 0.0461 |
| 239356_at   |          | Clone IMAGE:1257951; mRNA sequence                                  | -0.1579 | 0.0261 |
| 239369_at   | LCN8     | lipocalin 8                                                         | -0.1236 | 0.0183 |
| 239370_at   |          | Full length insert cDNA clone ZE01A04                               | -0.1934 | 0.0044 |
| 239371_at   |          | Transcribed locus                                                   | -0.3246 | 0.0001 |
| 239372_at   |          | Transcribed locus                                                   | -0.1793 | 0.0212 |
| 239381_at   | KLK7     | kallikrein-related peptidase 7                                      | -0.2142 | 0.0272 |
| 239412_at   | IRF5     | interferon regulatory factor 5                                      | -0.6485 | 0.0264 |
| 239417_x_at | C6orf52  | chromosome 6 open reading frame 52                                  | -0.2762 | 0.0371 |
| 239421_at   | FLJ35776 | Hypothetical protein LOC649446                                      | -0.2569 | 0.0023 |
| 239426_at   | SLC2A8   | Solute carrier family 2; (facilitated glucose transporter) member 8 | -0.549  | 0.0303 |
| 239434_at   |          |                                                                     | -0.2225 | 0.0041 |
| 239437_at   |          | Transcribed locus                                                   | -1.2044 | 0      |
| 239440_at   |          | Transcribed locus                                                   | -0.1221 | 0.0345 |
| 239451_at   |          | CDNA FLJ26407 fis; clone HRT09288                                   | -1.2583 | 0.0032 |
| 239452_at   |          | Transcribed locus                                                   | -0.3318 | 0      |
| 239454_at   | SCARF2   | scavenger receptor class F; member 2                                | -0.1006 | 0.0296 |
| 239483_at   | FLJ37035 | FLJ37035 protein                                                    | -0.2047 | 0.0178 |
| 239499_at   | DNAH2    | dynein; axonemal; heavy chain 2                                     | -0.1526 | 0.0276 |
| 239510_at   | C1orf212 | chromosome 1 open reading frame 212                                 | -0.103  | 0.016  |
| 239517_at   |          | Transcribed locus                                                   | -0.2091 | 0.0074 |
| 239518_at   |          | Transcribed locus                                                   | -0.11   | 0.0334 |
| 239526_x_at | PTPN1    | Protein tyrosine phosphatase; non-receptor type 1                   | -0.1862 | 0.0026 |
| 239528_at   | PROM2    | prominin 2                                                          | -0.1736 | 0.0112 |
| 239544_at   |          | Transcribed locus                                                   | -0.3632 | 0.0002 |
| 239548_at   | NEGR1    | neuronal growth regulator 1                                         | -0.2179 | 0.0002 |
| 239564_at   |          | CDNA clone IMAGE:4824791                                            | -0.1465 | 0.0033 |
| 239565_at   |          | CDNA FLJ37010 fis; clone BRACE2009732                               | -0.3179 | 0.0034 |
| 239566_at   |          | Transcribed locus                                                   | -0.1948 | 0.0004 |
| 239567_at   |          | Transcribed locus                                                   | -0.8214 | 0.0009 |
| 239569_at   | FLJ31485 | hypothetical gene supported by AK056047; AK056281; AK123838         | -0.1186 | 0.0065 |
| 239574_at   |          | Transcribed locus                                                   | -0.2303 | 0.0336 |

|             |           |                                                                        |         |        |
|-------------|-----------|------------------------------------------------------------------------|---------|--------|
| 239584_at   |           | CDNA FLJ35805 fis; clone TESTI2005982                                  | -0.6487 | 0      |
| 239595_at   | GPX2      | Glutathione peroxidase 2 (gastrointestinal)                            | -0.2523 | 0.0011 |
| 239603_x_at |           |                                                                        | -0.2675 | 0.0111 |
| 239604_at   |           | Transcribed locus                                                      | -0.5438 | 0.001  |
| 239606_at   |           | CDNA FLJ25345 fis; clone TST01118                                      | -0.1127 | 0.0394 |
| 239617_at   | SEC13     | SEC13 homolog (S. cerevisiae)                                          | -0.1591 | 0.0433 |
| 239618_at   | SEC16B    | SEC16 homolog B (S. cerevisiae)                                        | -0.1224 | 0.0482 |
| 239626_x_at | TM9SF3    | Transmembrane 9 superfamily member 3                                   | -0.1749 | 0.0047 |
| 239627_at   | TMED9     | Transmembrane emp24 protein transport domain containing 9              | -0.2243 | 0.0319 |
| 239652_at   |           | Transcribed locus                                                      | -0.1308 | 0.0238 |
| 239676_x_at | LOC642031 | hypothetical protein LOC642031                                         | -0.102  | 0.0172 |
| 239677_at   |           | Transcribed locus                                                      | -0.2438 | 0.0031 |
| 239683_at   |           |                                                                        | -0.5105 | 0.0004 |
| 239686_at   |           | Transcribed locus                                                      | -0.1897 | 0.0134 |
| 239704_at   | RNF144B   | ring finger 144B                                                       | -0.2011 | 0.0069 |
| 239708_at   |           | Transcribed locus                                                      | -0.3915 | 0.0098 |
| 239725_at   | PGAP1     | GPI deacylase                                                          | -3.5593 | 0      |
| 239746_at   | MESDC2    | mesoderm development candidate 2                                       | -0.1507 | 0.0063 |
| 239747_s_at |           | MRNA full length insert cDNA clone EUROIMAGE 381867                    | -0.1666 | 0.039  |
| 239749_at   | FAF1      | Fas (TNFRSF6) associated factor 1                                      | -0.1255 | 0.05   |
| 239750_x_at | VAPA      | VAMP (vesicle-associated membrane protein)-associated protein A; 33kDa | -0.2114 | 0.0011 |
| 239763_at   | PRDM11    | PR domain containing 11                                                | -0.5824 | 0      |
| 239772_x_at | DHX30     | DEAH (Asp-Glu-Ala-His) box polypeptide 30                              | -0.3572 | 0.0004 |
| 239777_at   | LOC283551 | hypothetical protein LOC283551                                         | -1.2439 | 0.0058 |
| 239782_at   |           | Transcribed locus                                                      | -0.244  | 0.0048 |
| 239786_at   |           | Transcribed locus                                                      | -0.1769 | 0.0033 |
| 239789_at   | C11orf49  | chromosome 11 open reading frame 49                                    | -0.1475 | 0.0298 |
| 239791_at   | LOC404266 | Hypothetical LOC404266                                                 | -0.237  | 0.0008 |
| 239820_at   | RNF7      | Ring finger protein 7                                                  | -0.1251 | 0.0267 |
| 239821_at   | FLJ30064  | hypothetical protein LOC644975                                         | -0.1213 | 0.0069 |
| 239822_at   |           | CDNA clone IMAGE:4816129                                               | -0.1163 | 0.0376 |
| 239828_at   | FLJ25791  | hypothetical protein FLJ25791                                          | -0.1779 | 0.006  |
| 239845_at   |           | Transcribed locus                                                      | -0.4067 | 0.0046 |
| 239849_at   |           | Transcribed locus                                                      | -0.7078 | 0      |
| 239855_at   | PPM1L     | Protein phosphatase 1 (formerly 2C)-like                               | -0.1049 | 0.0068 |
| 239865_at   |           | Transcribed locus                                                      | -0.1969 | 0.0012 |
| 239866_at   |           | CDNA FLJ14392 fis; clone HEMBA1003166                                  | -0.9916 | 0.0176 |

|             |           |                                                                                                                                                                                                                |         |        |
|-------------|-----------|----------------------------------------------------------------------------------------------------------------------------------------------------------------------------------------------------------------|---------|--------|
| 239875_at   | LOC729207 | hypothetical protein LOC729207                                                                                                                                                                                 | -0.1171 | 0.0444 |
| 239882_at   |           | Non-coding transcript; polyA signal; clone 48-E/2.4Kb                                                                                                                                                          | -0.1028 | 0.0337 |
| 239891_x_at | RAB12     | RAB12; member RAS oncogene family                                                                                                                                                                              | -0.3336 | 0.0016 |
| 239898_x_at | ZNF286A   | zinc finger protein 286A                                                                                                                                                                                       | -0.2159 | 0.0025 |
| 239899_at   | RNF145    | Ring finger protein 145                                                                                                                                                                                        | -0.1988 | 0.0017 |
| 239916_at   | WDR16     | WD repeat domain 16                                                                                                                                                                                            | -0.111  | 0.0116 |
| 239925_at   |           | Transcribed locus; moderately similar to XP_001117448.1 hypothetical protein [Macaca mulatta]                                                                                                                  | -0.1476 | 0.0364 |
| 239932_at   |           | Transcribed locus                                                                                                                                                                                              | -0.1686 | 0.0217 |
| 239940_at   |           | Transcribed locus                                                                                                                                                                                              | -0.1507 | 0.0376 |
| 239959_x_at |           |                                                                                                                                                                                                                | -0.1451 | 0.0379 |
| 239961_at   |           | Transcribed locus                                                                                                                                                                                              | -0.122  | 0.0491 |
| 239964_at   | TCL6      | T-cell leukemia/lymphoma 6                                                                                                                                                                                     | -0.1948 | 0.0009 |
| 239966_at   |           | Transcribed locus                                                                                                                                                                                              | -0.2222 | 0.0478 |
| 239967_at   |           | Transcribed locus                                                                                                                                                                                              | -0.1188 | 0.0191 |
| 239968_at   | C21orf84  | chromosome 21 open reading frame 84                                                                                                                                                                            | -0.598  | 0      |
| 239975_at   | HLA-DPB2  | major histocompatibility complex; class II; DP beta 2 (pseudogene)                                                                                                                                             | -0.8101 | 0.0068 |
| 239981_x_at | LOC728902 | hypothetical protein LOC728902                                                                                                                                                                                 | -0.2083 | 0.0005 |
| 239984_at   |           |                                                                                                                                                                                                                | -0.6309 | 0      |
| 239989_at   |           | Transcribed locus                                                                                                                                                                                              | -0.2373 | 0.0251 |
| 239993_at   | LOC390705 | similar to protein phosphatase 2A 48 kDa regulatory subunit isoform 1; serine/threonine protein phosphatase 2A; 48kDa regulatory subunit; PP2A; subunit B; PR48 isoform; PP2A B subunit PR48; NY-REN-8 antigen | -0.15   | 0.0018 |
| 239998_at   | C10orf53  | chromosome 10 open reading frame 53                                                                                                                                                                            | -0.2599 | 0.0003 |
| 239999_at   | C21orf34  | Chromosome 21 open reading frame 34                                                                                                                                                                            | -1.1992 | 0.0194 |
| 240009_at   |           | Transcribed locus                                                                                                                                                                                              | -0.1809 | 0.0061 |
| 240010_at   |           | Transcribed locus                                                                                                                                                                                              | -0.1607 | 0.0073 |
| 240017_at   | LOC400960 | Hypothetical gene supported by BC040598                                                                                                                                                                        | -0.147  | 0.017  |
| 240021_at   |           | Transcribed locus                                                                                                                                                                                              | -0.2404 | 0.0009 |
| 240023_at   |           | Transcribed locus                                                                                                                                                                                              | -0.1803 | 0.0178 |
| 240024_at   | SEC14L2   | SEC14-like 2 (S. cerevisiae)                                                                                                                                                                                   | -0.1356 | 0.0073 |
| 240030_at   | COMMD6    | COMM domain containing 6                                                                                                                                                                                       | -0.1733 | 0.0045 |
| 240035_at   |           | Transcribed locus                                                                                                                                                                                              | -0.1392 | 0.0235 |
| 240038_at   |           | Transcribed locus                                                                                                                                                                                              | -2.6024 | 0      |
| 240039_at   | PLA2R1    | phospholipase A2 receptor 1; 180kDa                                                                                                                                                                            | -0.182  | 0.0086 |
| 240041_at   | PTCHD1    | patched domain containing 1                                                                                                                                                                                    | -0.1525 | 0.0067 |



|             |           |                                                                                                                        |         |        |
|-------------|-----------|------------------------------------------------------------------------------------------------------------------------|---------|--------|
| 240060_at   |           | Full-length cDNA clone CS0DF025YK13 of Fetal brain of Homo sapiens (human)                                             | -2.9245 | 0      |
| 240064_at   |           | Transcribed locus; strongly similar to XP_529518.1 hypothetical protein XP_529518 [Pan troglodytes]                    | -0.2066 | 0.0382 |
| 240074_at   |           | Transcribed locus                                                                                                      | -0.2542 | 0.0175 |
| 240077_at   |           | Transcribed locus                                                                                                      | -0.1632 | 0.0035 |
| 240082_s_at | C17orf74  | chromosome 17 open reading frame 74                                                                                    | -0.1732 | 0.0033 |
| 240085_at   |           |                                                                                                                        | -0.1847 | 0.0091 |
| 240108_at   |           | Transcribed locus                                                                                                      | -0.3497 | 0.0083 |
| 240110_at   | HMGCS2    | 3-hydroxy-3-methylglutaryl-Coenzyme A synthase 2 (mitochondrial)                                                       | -0.2064 | 0.001  |
| 240115_at   |           | MRNA; cDNA DKFZp686I01132 (from clone DKFZp686I01132)                                                                  | -0.2285 | 0.0051 |
| 240119_at   | TEPP      | testis/prostate/placenta-expressed protein                                                                             | -0.4831 | 0.0002 |
| 240120_at   |           | Transcribed locus                                                                                                      | -2.4231 | 0.0003 |
| 240123_at   |           | Transcribed locus                                                                                                      | -0.1453 | 0.0078 |
| 240142_at   |           | Transcribed locus; strongly similar to XP_001108111.1 similar to adipocyte-specific adhesion molecule [Macaca mulatta] | -0.2295 | 0.0066 |
| 240163_at   | LOC283666 | hypothetical protein LOC283666                                                                                         | -0.1463 | 0.0139 |
| 240169_at   |           | Full length insert cDNA clone YO64F11                                                                                  | -0.1651 | 0.0405 |
| 240175_at   |           | Transcribed locus                                                                                                      | -0.4264 | 0.0006 |
| 240180_at   |           | MRNA full length insert cDNA clone EUROIMAGE 1090207                                                                   | -0.3816 | 0      |
| 240188_at   |           |                                                                                                                        | -1.1834 | 0.008  |
| 240203_at   |           | Transcribed locus                                                                                                      | -0.1408 | 0.0097 |
| 240217_s_at |           | Transcribed locus                                                                                                      | -0.1696 | 0.0108 |
| 240219_at   |           | MRNA; cDNA DKFZp313E1940 (from clone DKFZp313E1940)                                                                    | -0.1459 | 0.0048 |
| 240220_at   |           | Transcribed locus                                                                                                      | -0.1253 | 0.0129 |
| 240227_at   | MIER1     | mesoderm induction early response 1 homolog (Xenopus laevis)                                                           | -0.1483 | 0.0419 |
| 240245_at   |           |                                                                                                                        | -1.3866 | 0.0031 |
| 240257_at   | SYNJ2     | synaptojanin 2                                                                                                         | -0.1652 | 0.0287 |
| 240272_at   | KRT223P   | keratin 223 pseudogene                                                                                                 | -0.1113 | 0.0051 |
| 240274_at   |           |                                                                                                                        | -0.2375 | 0.0041 |
| 240281_at   |           | Transcribed locus                                                                                                      | -0.1256 | 0.0127 |
| 240283_at   |           |                                                                                                                        | -0.2058 | 0.0137 |
| 240287_at   | LOC730249 | similar to Immune-responsive protein 1                                                                                 | -0.1416 | 0.0347 |
| 240293_at   | LOC283152 | hypothetical protein LOC283152                                                                                         | -0.1659 | 0.004  |
| 240312_at   | LOC389895 | similar to CG4768-PA                                                                                                   | -2.9751 | 0      |
| 240323_at   |           | Transcribed locus                                                                                                      | -0.1262 | 0.0149 |

|             |             |                                                                                                                                                                                                        |         |        |
|-------------|-------------|--------------------------------------------------------------------------------------------------------------------------------------------------------------------------------------------------------|---------|--------|
| 240329_at   | PTP4A1      | protein tyrosine phosphatase type IVA; member 1                                                                                                                                                        | -0.2366 | 0.0009 |
| 240333_at   |             | Transcribed locus                                                                                                                                                                                      | -0.2599 | 0.0002 |
| 240334_at   |             |                                                                                                                                                                                                        | -0.1312 | 0.009  |
| 240337_at   | RHOA        | Ras homolog gene family; member A                                                                                                                                                                      | -0.1038 | 0.0237 |
| 240340_at   | SPATA3      | spermatogenesis associated 3                                                                                                                                                                           | -0.2005 | 0.0017 |
| 240343_at   |             | Transcribed locus                                                                                                                                                                                      | -0.1287 | 0.0258 |
| 240346_at   | LOC644222   | hypothetical LOC644222                                                                                                                                                                                 | -0.1187 | 0.0093 |
| 240360_at   | BRD4        | bromodomain containing 4                                                                                                                                                                               | -0.1262 | 0.0437 |
| 240372_at   |             | Transcribed locus                                                                                                                                                                                      | -0.3013 | 0.0006 |
| 240374_at   |             |                                                                                                                                                                                                        | -0.1209 | 0.0313 |
| 240380_at   | hCG_1813624 | hCG1813624                                                                                                                                                                                             | -0.1043 | 0.0497 |
| 240384_at   |             | Transcribed locus; strongly similar to XP_511070.1 similar to Nedd-4-like E3 ubiquitin-protein ligase WWP2 (WW domain-containing protein 2) (Atropin-1 interacting protein 2) (AIP2) [Pan troglodytes] | -0.1432 | 0.0206 |
| 240385_at   |             |                                                                                                                                                                                                        | -2.1363 | 0      |
| 240387_at   | STS-1       | Cbl-interacting protein Sts-1                                                                                                                                                                          | -0.1725 | 0.04   |
| 240398_at   |             | Transcribed locus                                                                                                                                                                                      | -0.2782 | 0.0458 |
| 240402_at   | KIRREL3     | kin of IRRE like 3 (Drosophila)                                                                                                                                                                        | -0.1809 | 0.0276 |
| 240404_at   |             | Transcribed locus                                                                                                                                                                                      | -0.1528 | 0.0154 |
| 240409_at   | SUGT1L1     | SGT1; suppressor of G2 allele of SKP1 like 1 (S. cerevisiae)                                                                                                                                           | -0.2592 | 0.0003 |
| 240410_at   |             | Transcribed locus                                                                                                                                                                                      | -0.2124 | 0.0234 |
| 240412_s_at | FLJ40243    | hypothetical protein FLJ40243                                                                                                                                                                          | -0.1377 | 0.0369 |
| 240430_at   | KCMF1       | potassium channel modulatory factor 1                                                                                                                                                                  | -0.2239 | 0.0198 |
| 240437_at   |             |                                                                                                                                                                                                        | -0.9247 | 0      |
| 240455_at   |             | Transcribed locus                                                                                                                                                                                      | -0.2424 | 0.036  |
| 240459_at   | YTHDC1      | YTH domain containing 1                                                                                                                                                                                | -0.1969 | 0.0311 |
| 240465_at   | C4orf32     | chromosome 4 open reading frame 32                                                                                                                                                                     | -0.1546 | 0.0126 |
| 240471_at   |             |                                                                                                                                                                                                        | -0.1269 | 0.012  |
| 240473_at   |             |                                                                                                                                                                                                        | -0.1702 | 0.0141 |
| 240476_at   |             | Transcribed locus                                                                                                                                                                                      | -0.1202 | 0.0188 |
| 240481_at   |             | Transcribed locus                                                                                                                                                                                      | -0.1475 | 0.0428 |
| 240486_at   | HELZ        | Helicase with zinc finger                                                                                                                                                                              | -0.1933 | 0.0417 |
| 240495_at   |             | CDNA clone IMAGE:5266735                                                                                                                                                                               | -0.1625 | 0.0294 |
| 240496_at   |             | Transcribed locus                                                                                                                                                                                      | -0.2472 | 0.0204 |
| 240508_at   |             |                                                                                                                                                                                                        | -0.2137 | 0.0083 |
| 240519_at   |             | Transcribed locus; strongly similar to XP_001143029.1 hypothetical protein [Pan troglodytes]                                                                                                           | -0.1395 | 0.0202 |
| 240527_at   |             |                                                                                                                                                                                                        | -0.2712 | 0.0156 |
| 240532_at   | SLC32A1     | solute carrier family 32 (GABA vesicular transporter); member 1                                                                                                                                        | -0.1208 | 0.0205 |

|             |           |                                                                                                     |         |        |
|-------------|-----------|-----------------------------------------------------------------------------------------------------|---------|--------|
| 240534_at   |           | Transcribed locus                                                                                   | -0.128  | 0.0045 |
| 240560_at   |           |                                                                                                     | -0.1318 | 0.0214 |
| 240576_at   | MGC51025  | hypothetical protein MGC51025, zinc finger protein 286A                                             | -0.1495 | 0.0217 |
| 240582_x_at |           | Transcribed locus                                                                                   | -0.255  | 0.013  |
| 240588_at   |           |                                                                                                     | -0.1678 | 0.0008 |
| 240590_at   | LOC348761 | hypothetical protein LOC348761                                                                      | -0.1174 | 0.0217 |
| 240598_at   |           |                                                                                                     | -0.1496 | 0.0375 |
| 240623_at   |           | Transcribed locus                                                                                   | -0.1543 | 0.0149 |
| 240629_at   |           | Transcribed locus                                                                                   | -0.4871 | 0      |
| 240630_at   |           | Transcribed locus                                                                                   | -0.2545 | 0.0045 |
| 240632_at   |           |                                                                                                     | -0.1523 | 0.0173 |
| 240633_at   | DOK7      | docking protein 7                                                                                   | -0.171  | 0.0092 |
| 240643_at   | TTBK1     | tau tubulin kinase 1                                                                                | -0.1275 | 0.0012 |
| 240644_at   |           | Transcribed locus                                                                                   | -0.2409 | 0.0093 |
| 240645_at   |           |                                                                                                     | -0.1113 | 0.0232 |
| 240648_at   |           | Transcribed locus; strongly similar to XP_530233.1 hypothetical protein XP_530233 [Pan troglodytes] | -0.2594 | 0.0015 |
| 240650_at   | CACNA1E   | Calcium channel; voltage-dependent; R type; alpha 1E subunit                                        | -0.1465 | 0.0105 |
| 240651_at   |           | Transcribed locus                                                                                   | -1.9386 | 0.0003 |
| 240652_at   |           |                                                                                                     | -0.335  | 0.028  |
| 240661_at   | LOC284475 | hypothetical protein LOC284475                                                                      | -0.1071 | 0.0427 |
| 240672_at   |           |                                                                                                     | -0.1616 | 0.0287 |
| 240679_at   |           | Transcribed locus                                                                                   | -0.1489 | 0.0041 |
| 240682_at   | BEYLA     | hypothetical LOC497634                                                                              | -0.1873 | 0.0026 |
| 240683_at   |           |                                                                                                     | -0.1288 | 0.0204 |
| 240689_at   | LOC283677 | hypothetical LOC283677                                                                              | -0.2136 | 0.0036 |
| 240693_at   |           | Transcribed locus                                                                                   | -0.1373 | 0.0213 |
| 240694_at   |           | Transcribed locus                                                                                   | -0.1553 | 0.0043 |
| 240695_at   |           |                                                                                                     | -0.151  | 0.0139 |
| 240696_at   |           | Transcribed locus                                                                                   | -0.1427 | 0.0104 |
| 240707_at   |           | Transcribed locus                                                                                   | -0.1493 | 0.0023 |
| 240722_at   |           | Transcribed locus                                                                                   | -0.1462 | 0.0197 |
| 240740_at   |           | Transcribed locus                                                                                   | -0.1578 | 0.0101 |
| 240743_at   |           |                                                                                                     | -0.1089 | 0.0151 |
| 240744_at   | CPA5      | carboxypeptidase A5                                                                                 | -0.1311 | 0.037  |
| 240747_at   |           | Transcribed locus                                                                                   | -0.1093 | 0.0273 |
| 240752_at   | PCGF2     | Polycomb group ring finger 2                                                                        | -0.2106 | 0.0026 |
| 240753_at   |           | Transcribed locus                                                                                   | -0.1141 | 0.0332 |
| 240756_at   |           | CDNA FLJ34247 fis; clone FCBBF4000192                                                               | -0.3287 | 0      |

|             |           |                                                                                                                                                                                              |         |        |
|-------------|-----------|----------------------------------------------------------------------------------------------------------------------------------------------------------------------------------------------|---------|--------|
| 240767_x_at | VPS13A    | Vacuolar protein sorting 13 homolog A ( <i>S. cerevisiae</i> )                                                                                                                               | -0.1388 | 0.0425 |
| 240781_x_at |           | CDNA FLJ38454 fis; clone FEBRA2019690                                                                                                                                                        | -0.239  | 0.003  |
| 240783_at   |           | Transcribed locus                                                                                                                                                                            | -0.1556 | 0.046  |
| 240785_at   |           | Transcribed locus                                                                                                                                                                            | -0.1772 | 0.0043 |
| 240786_at   | NOTCH4    | Notch homolog 4 ( <i>Drosophila</i> )                                                                                                                                                        | -0.1889 | 0.0129 |
| 240792_at   |           |                                                                                                                                                                                              | -0.1939 | 0.0451 |
| 240794_at   | NPAS4     | Neuronal PAS domain protein 4                                                                                                                                                                | -0.1633 | 0.0102 |
| 240795_at   |           | CDNA clone IMAGE:5288566                                                                                                                                                                     | -0.1891 | 0.048  |
| 240804_at   |           |                                                                                                                                                                                              | -0.1706 | 0.0341 |
| 240818_at   |           | Transcribed locus; moderately similar to XP_001101446.1 similar to ovochymase 1 [ <i>Macaca mulatta</i> ]                                                                                    | -0.1105 | 0.0338 |
| 240821_at   |           | Transcribed locus                                                                                                                                                                            | -0.2163 | 0.0477 |
| 240822_at   | TDP1      | Tyrosyl-DNA phosphodiesterase 1                                                                                                                                                              | -0.142  | 0.0152 |
| 240826_at   |           | Transcribed locus                                                                                                                                                                            | -0.1568 | 0.0076 |
| 240827_at   |           | Homo sapiens; clone IMAGE:4498705; mRNA                                                                                                                                                      | -0.1404 | 0.0272 |
| 240831_at   |           | Transcribed locus                                                                                                                                                                            | -0.189  | 0.0185 |
| 240837_at   | FNDC7     | fibronectin type III domain containing 7                                                                                                                                                     | -0.1778 | 0.004  |
| 240849_at   |           |                                                                                                                                                                                              | -0.194  | 0.0118 |
| 240852_at   |           |                                                                                                                                                                                              | -0.1019 | 0.0121 |
| 240853_at   |           |                                                                                                                                                                                              | -0.2284 | 0.0112 |
| 240860_at   |           | Transcribed locus                                                                                                                                                                            | -0.1573 | 0.0008 |
| 240862_at   | RASGRP4   | RAS guanyl releasing protein 4                                                                                                                                                               | -0.1238 | 0.0038 |
| 240863_at   | CYP19A1   | cytochrome P450; family 19; subfamily A; polypeptide 1                                                                                                                                       | -0.4711 | 0      |
| 240871_at   | C9orf128  | chromosome 9 open reading frame 128                                                                                                                                                          | -0.1353 | 0.0222 |
| 240891_at   | FSTL1     | Follistatin-like 1                                                                                                                                                                           | -0.3358 | 0.0002 |
| 240892_at   |           | Transcribed locus                                                                                                                                                                            | -0.2698 | 0.0063 |
| 240894_at   |           | Transcribed locus                                                                                                                                                                            | -0.1092 | 0.0495 |
| 240896_at   |           |                                                                                                                                                                                              | -0.1164 | 0.0006 |
| 240897_at   |           | Transcribed locus                                                                                                                                                                            | -0.2137 | 0.0017 |
| 240903_at   |           | Transcribed locus                                                                                                                                                                            | -0.2142 | 0.0022 |
| 240913_at   | FGFR2     | fibroblast growth factor receptor 2 (bacteria-expressed kinase; keratinocyte growth factor receptor; craniofacial dysostosis 1; Crouzon syndrome; Pfeiffer syndrome; Jackson-Weiss syndrome) | -0.1493 | 0.0413 |
| 240916_x_at |           |                                                                                                                                                                                              | -0.1346 | 0.0379 |
| 240920_at   |           | Transcribed locus                                                                                                                                                                            | -0.1444 | 0.0408 |
| 240923_at   |           | Transcribed locus                                                                                                                                                                            | -0.1777 | 0.0013 |
| 240925_at   |           | Transcribed locus                                                                                                                                                                            | -0.1607 | 0.0155 |
| 240929_at   |           |                                                                                                                                                                                              | -0.4885 | 0.0042 |
| 240937_at   | LOC389662 | similar to septin 10 isoform 1                                                                                                                                                               | -0.1118 | 0.027  |

|             |           |                                                             |         |        |
|-------------|-----------|-------------------------------------------------------------|---------|--------|
| 240944_at   |           | CDNA clone IMAGE:5532261                                    | -0.1079 | 0.0025 |
| 240948_at   |           | Transcribed locus                                           | -0.697  | 0      |
| 240954_at   |           | Transcribed locus                                           | -0.1419 | 0.0215 |
| 240977_at   |           |                                                             | -0.1118 | 0.0169 |
| 240999_at   | LOC401351 | hypothetical gene supported by BC040831                     | -0.1415 | 0.0484 |
| 241003_at   |           |                                                             | -0.1273 | 0.0302 |
| 241017_at   | TBC1D8    | TBC1 domain family; member 8 (with GRAM domain)             | -0.4931 | 0.0005 |
| 241030_at   |           |                                                             | -0.1156 | 0.0247 |
| 241042_at   |           |                                                             | -0.1252 | 0.0066 |
| 241045_at   |           |                                                             | -0.2373 | 0.0152 |
| 241046_at   |           | Transcribed locus                                           | -0.1598 | 0.0127 |
| 241051_at   |           |                                                             | -0.1546 | 0.0417 |
| 241054_at   |           | Transcribed locus                                           | -0.2055 | 0.0231 |
| 241057_x_at |           |                                                             | -0.1894 | 0.0205 |
| 241059_at   |           | Transcribed locus                                           | -0.1095 | 0.0356 |
| 241067_at   |           | Transcribed locus                                           | -0.1282 | 0.0493 |
| 241087_at   |           |                                                             | -0.1664 | 0.0204 |
| 241088_at   |           | Transcribed locus                                           | -0.1001 | 0.0278 |
| 241112_at   |           |                                                             | -0.231  | 0.0018 |
| 241114_s_at |           | Transcribed locus                                           | -0.8425 | 0      |
| 241119_at   |           |                                                             | -0.1784 | 0.0032 |
| 241129_at   |           | Transcribed locus                                           | -0.1232 | 0.018  |
| 241137_at   | DPCR1     | diffuse panbronchiolitis critical region 1                  | -0.1023 | 0.0305 |
| 241143_at   |           | Transcribed locus                                           | -0.1354 | 0.0243 |
| 241145_at   |           |                                                             | -0.1002 | 0.0159 |
| 241155_at   |           |                                                             | -0.1417 | 0.003  |
| 241160_at   |           | Transcribed locus                                           | -0.1057 | 0.0103 |
| 241175_at   |           | Transcribed locus                                           | -0.269  | 0.0001 |
| 241178_at   |           |                                                             | -0.1644 | 0.0275 |
| 241181_x_at |           | Transcribed locus                                           | -0.1004 | 0.0498 |
| 241187_at   |           | Transcribed locus                                           | -0.2074 | 0.0337 |
| 241189_at   |           |                                                             | -0.2218 | 0.0086 |
| 241193_at   | ETS2      | V-ets erythroblastosis virus E26 oncogene homolog 2 (avian) | -0.1622 | 0.0097 |
| 241196_at   | LOC728777 | hypothetical protein LOC728777                              | -0.1643 | 0.0083 |
| 241212_at   |           | Transcribed locus                                           | -0.1268 | 0.0039 |
| 241213_x_at |           | Transcribed locus                                           | -0.366  | 0.0015 |
| 241215_at   |           | Transcribed locus                                           | -0.7242 | 0.0084 |
| 241230_at   |           |                                                             | -0.1635 | 0.0087 |
| 241240_at   |           | Transcribed locus                                           | -0.137  | 0.032  |
| 241243_at   |           | Transcribed locus                                           | -0.1672 | 0.0428 |

|             |           |                                                                                               |         |        |
|-------------|-----------|-----------------------------------------------------------------------------------------------|---------|--------|
| 241248_at   |           |                                                                                               | -0.1317 | 0.0163 |
| 241258_at   |           | Transcribed locus                                                                             | -0.1667 | 0.0013 |
| 241276_at   |           |                                                                                               | -0.2216 | 0.0243 |
| 241279_at   |           |                                                                                               | -0.1199 | 0.0225 |
| 241280_at   | ALDOB     | Aldolase B; fructose-bisphosphate                                                             | -0.1263 | 0.0431 |
| 241282_at   |           | Transcribed locus                                                                             | -0.1409 | 0.0344 |
| 241288_at   |           |                                                                                               | -0.16   | 0.002  |
| 241295_at   |           | Transcribed locus                                                                             | -0.1303 | 0.0088 |
| 241299_at   |           | Transcribed locus                                                                             | -0.2714 | 0.0049 |
| 241302_at   |           | Transcribed locus                                                                             | -3.0599 | 0      |
| 241308_at   | LOC729589 | hypothetical protein LOC729589                                                                | -0.1422 | 0.001  |
| 241323_at   |           | Transcribed locus                                                                             | -0.1167 | 0.0242 |
| 241326_at   | AK7       | adenylate kinase 7                                                                            | -0.1416 | 0.0375 |
| 241332_at   |           | Transcribed locus                                                                             | -0.1012 | 0.0156 |
| 241337_at   | LOC728347 | Hypothetical protein LOC728347                                                                | -0.131  | 0.0337 |
| 241349_at   |           | Transcribed locus                                                                             | -0.1473 | 0.0039 |
| 241359_at   |           | CDNA FLJ20031 fis; clone ADSU02180                                                            | -1.7957 | 0.0007 |
| 241363_at   | FLJ20433  | hypothetical protein FLJ20433                                                                 | -0.3    | 0      |
| 241364_at   | TMEM57    | transmembrane protein 57                                                                      | -1.2488 | 0      |
| 241368_at   | LSDP5     | lipid storage droplet protein 5                                                               | -0.2435 | 0.0364 |
| 241373_at   |           | Transcribed locus                                                                             | -0.481  | 0.0001 |
| 241378_at   | MIB2      | Mindbomb homolog 2 (Drosophila)                                                               | -0.18   | 0.0148 |
| 241384_x_at | GK5       | glycerol kinase 5 (putative)                                                                  | -0.6534 | 0      |
| 241395_at   | NIT1      | Nitrilase 1                                                                                   | -1.097  | 0      |
| 241396_at   | NEDD4L    | neural precursor cell expressed; developmentally down-regulated 4-like                        | -1.2631 | 0      |
| 241398_at   | MPPED1    | Metallophosphoesterase domain containing 1                                                    | -0.1266 | 0.0292 |
| 241416_at   |           | Transcribed locus                                                                             | -0.764  | 0.0067 |
| 241428_x_at | TCEA2     | transcription elongation factor A (SII); 2                                                    | -0.3401 | 0.0192 |
| 241442_at   |           | Transcribed locus                                                                             | -0.2401 | 0.0004 |
| 241451_s_at |           | Homo sapiens; clone IMAGE:4523945; mRNA                                                       | -0.153  | 0.0352 |
| 241459_at   |           | Transcribed locus                                                                             | -0.9225 | 0.015  |
| 241477_at   | NEIL1     | nei endonuclease VIII-like 1 (E. coli)                                                        | -0.2972 | 0.0046 |
| 241486_at   | HGSNAT    | Heparan-alpha-glucosaminide N-acetyltransferase                                               | -0.2877 | 0.0437 |
| 241493_at   |           | Transcribed locus                                                                             | -0.235  | 0.0046 |
| 241504_at   |           | Transcribed locus; moderately similar to XP_001111131.1 hypothetical protein [Macaca mulatta] | -0.203  | 0.001  |
| 241511_at   |           |                                                                                               | -0.1365 | 0.0092 |
| 241516_at   |           |                                                                                               | -0.1208 | 0.0303 |

|             |           |                                                                                     |         |        |
|-------------|-----------|-------------------------------------------------------------------------------------|---------|--------|
| 241521_at   |           | Transcribed locus                                                                   | -0.2173 | 0.0028 |
| 241523_at   |           |                                                                                     | -0.1766 | 0.0021 |
| 241536_at   |           | Full length insert cDNA YO61A08                                                     | -0.1178 | 0.0178 |
| 241540_at   |           |                                                                                     | -0.3455 | 0.0017 |
| 241552_at   |           | AA02 pseudogene mRNA; partial sequence                                              | -0.2053 | 0.0132 |
| 241561_at   |           | Transcribed locus                                                                   | -0.3134 | 0.026  |
| 241566_at   |           |                                                                                     | -0.1087 | 0.0089 |
| 241568_at   |           | Transcribed locus                                                                   | -0.1603 | 0.0458 |
| 241580_at   | KIAA1729  | KIAA1729 protein                                                                    | -0.3135 | 0.002  |
| 241582_at   |           | Transcribed locus                                                                   | -0.1422 | 0.0072 |
| 241587_at   |           | Transcribed locus                                                                   | -0.1054 | 0.0282 |
| 241591_at   |           |                                                                                     | -0.1281 | 0.0002 |
| 241594_at   | LOC643449 | hypothetical LOC643449                                                              | -0.1088 | 0.021  |
| 241597_at   |           |                                                                                     | -0.2042 | 0.0001 |
| 241602_at   | ZNF582    | zinc finger protein 582                                                             | -0.619  | 0.0006 |
| 241603_at   | ATP11A    | ATPase; Class VI; type 11A                                                          | -0.1012 | 0.0465 |
| 241605_at   | TRUB1     | TruB pseudouridine (psi) synthase homolog 1 (E. coli)                               | -0.1361 | 0.0007 |
| 241610_x_at |           | Transcribed locus                                                                   | -0.2846 | 0.001  |
| 241615_x_at |           | Transcribed locus                                                                   | -0.2451 | 0.0001 |
| 241640_at   | BCAP29    | B-cell receptor-associated protein 29                                               | -0.3274 | 0.0413 |
| 241648_at   |           | Transcribed locus                                                                   | -0.1005 | 0.0326 |
| 241677_x_at |           |                                                                                     | -0.1999 | 0.0088 |
| 241679_at   |           |                                                                                     | -0.618  | 0.0004 |
| 241684_at   |           | Transcribed locus                                                                   | -0.194  | 0.0002 |
| 241703_at   | RPIB9     | Rap2-binding protein 9                                                              | -1.0922 | 0.0303 |
| 241721_at   |           | CDNA FLJ37844 fis; clone BRSSN2012622                                               | -0.8134 | 0.0156 |
| 241739_at   | OGFOD1    | 2-oxoglutarate and iron-dependent oxygenase domain containing 1                     | -1.0822 | 0.0166 |
| 241740_at   |           | Transcribed locus                                                                   | -2.081  | 0      |
| 241743_at   |           | CDNA FLJ31091 fis; clone IMR321000155; highly similar to 60S RIBOSOMAL PROTEIN L35A | -0.1743 | 0.0476 |
| 241764_at   |           |                                                                                     | -0.1161 | 0.0249 |
| 241771_at   | RIMBP2    | RIMS binding protein 2                                                              | -0.1298 | 0.0275 |
| 241789_at   |           | CDNA FLJ36544 fis; clone TRACH2006378                                               | -1.9106 | 0      |
| 241791_at   | TTN       | titin                                                                               | -0.2263 | 0.0163 |
| 241801_at   | PGAP1     | GPI deacylase                                                                       | -2.5902 | 0      |
| 241824_at   |           | Transcribed locus                                                                   | -2.1108 | 0.0003 |
| 241835_at   |           | CDNA clone IMAGE:4822225                                                            | -0.7326 | 0.025  |
| 241839_at   |           | Transcribed locus                                                                   | -0.2129 | 0.0308 |
| 241841_at   |           | Transcribed locus                                                                   | -0.28   | 0.0053 |

|             |          |                                                                          |         |        |
|-------------|----------|--------------------------------------------------------------------------|---------|--------|
| 241842_x_at | C19orf45 | chromosome 19 open reading frame 45                                      | -0.2142 | 0.0431 |
| 241855_s_at |          |                                                                          | -0.1581 | 0.0257 |
| 241859_at   |          | Transcribed locus                                                        | -0.276  | 0.001  |
| 241862_x_at | C19orf45 | chromosome 19 open reading frame 45                                      | -0.3049 | 0.0013 |
| 241864_x_at |          | Transcribed locus                                                        | -0.6299 | 0.0008 |
| 241878_at   |          | Transcribed locus                                                        | -0.2149 | 0.0063 |
| 241894_at   | VMO1     | vitelline membrane outer layer 1 homolog (chicken)                       | -0.1855 | 0.0278 |
| 241896_at   |          |                                                                          | -0.1349 | 0.0037 |
| 241907_at   |          | Full length insert cDNA clone YR58A05                                    | -0.1891 | 0.0418 |
| 241919_x_at | WDR31    | WD repeat domain 31                                                      | -0.2179 | 0.0088 |
| 241922_at   |          |                                                                          | -0.171  | 0.0452 |
| 241939_at   | IQGAP3   | IQ motif containing GTPase activating protein 3                          | -0.1748 | 0.0026 |
| 241945_at   |          |                                                                          | -0.14   | 0.0406 |
| 241949_at   | ACOT6    | acyl-CoA thioesterase 6                                                  | -0.1654 | 0.0066 |
| 241952_at   | SLC16A11 | Solute carrier family 16; member 11 (monocarboxylic acid transporter 11) | -0.2391 | 0.0105 |
| 241962_at   |          | Transcribed locus                                                        | -0.3734 | 0.0003 |
| 241980_at   | MAP6     | microtubule-associated protein 6                                         | -0.1529 | 0.0049 |
| 241991_at   |          | Transcribed locus                                                        | -1.0709 | 0.0077 |
| 242004_x_at |          | Transcribed locus                                                        | -0.1631 | 0.0011 |
| 242032_at   |          | Transcribed locus                                                        | -0.1554 | 0.0226 |
| 242033_at   | RNF180   | ring finger protein 180                                                  | -1.0231 | 0.0005 |
| 242048_at   | PFDN6    | prefoldin subunit 6                                                      | -0.2055 | 0.0372 |
| 242071_x_at | ITGA8    | integrin; alpha 8                                                        | -0.2906 | 0.0123 |
| 242086_at   | SPATA6   | spermatogenesis associated 6                                             | -1.3399 | 0      |
| 242090_x_at |          | Transcribed locus                                                        | -0.1094 | 0.0211 |
| 242093_at   | SYTL5    | synaptotagmin-like 5                                                     | -4.0107 | 0      |
| 242123_at   | PAQR7    | progesterone and adipoQ receptor family member VII                       | -0.6904 | 0      |
| 242125_at   |          | CDNA FLJ36209 fis; clone THYMU2000022                                    | -0.4035 | 0.0024 |
| 242137_at   |          | CDNA FLJ36544 fis; clone TRACH2006378                                    | -0.4784 | 0.0387 |
| 242151_at   |          | Transcribed locus                                                        | -0.1647 | 0.0152 |
| 242177_at   |          | Transcribed locus                                                        | -0.1399 | 0.0334 |
| 242185_at   | SFRS12   | Splicing factor; arginine/serine-rich 12                                 | -0.2346 | 0.0023 |
| 242205_at   |          | Transcribed locus                                                        | -0.3136 | 0.0021 |
| 242220_at   | SPTBN1   | spectrin; beta; non-erythrocytic 1                                       | -0.2739 | 0      |
| 242226_at   |          | Clone IMAGp998D064417Q2 mRNA sequence                                    | -0.1802 | 0.0342 |
| 242230_at   | ATXN1    | ataxin 1                                                                 | -0.2525 | 0.0403 |
| 242255_at   | WDR37    | WD repeat domain 37                                                      | -2.0467 | 0      |



|             |           |                                                                                                     |         |        |
|-------------|-----------|-----------------------------------------------------------------------------------------------------|---------|--------|
| 242262_x_at |           | CDNA clone IMAGE:5272066                                                                            | -0.1663 | 0.0118 |
| 242263_at   | TMED5     | transmembrane emp24 protein transport domain containing 5                                           | -1.2894 | 0.0007 |
| 242267_x_at |           | Transcribed locus                                                                                   | -0.1213 | 0.0359 |
| 242278_at   |           | Transcribed locus                                                                                   | -0.1234 | 0.0308 |
| 242281_at   |           |                                                                                                     | -0.4886 | 0.0487 |
| 242285_at   |           | Transcribed locus                                                                                   | -0.1369 | 0.0114 |
| 242300_at   |           | Ubiquitin B (UBB) mRNA; 3' UTR and genetic suppressor element                                       | -1.3624 | 0.0024 |
| 242304_at   | WIBG      | within bgcn homolog (Drosophila)                                                                    | -1.1365 | 0.0018 |
| 242315_at   |           | Transcribed locus                                                                                   | -0.2471 | 0.0182 |
| 242317_at   |           | Transcribed locus                                                                                   | -1.1852 | 0.0012 |
| 242319_at   | DGKG      | diacylglycerol kinase; gamma 90kDa                                                                  | -0.1092 | 0.037  |
| 242320_at   |           | Homo sapiens; clone IMAGE:4769230; mRNA                                                             | -0.6512 | 0.0181 |
| 242332_at   | LOC283904 | hypothetical protein LOC283904                                                                      | -0.2907 | 0.0018 |
| 242340_at   |           | Transcribed locus                                                                                   | -0.2578 | 0      |
| 242341_x_at | GLYCTK    | glycerate kinase                                                                                    | -0.187  | 0.0225 |
| 242342_at   |           | CDNA FLJ40823 fis; clone TRACH2011093                                                               | -0.8107 | 0.0013 |
| 242344_at   | GABRB2    | gamma-aminobutyric acid (GABA) A receptor; beta 2                                                   | -2.429  | 0      |
| 242363_at   |           | Full-length cDNA clone CS0DF025YA01 of Fetal brain of Homo sapiens (human)                          | -0.9199 | 0.0439 |
| 242365_at   |           | Transcribed locus                                                                                   | -0.1491 | 0.0222 |
| 242367_at   |           |                                                                                                     | -0.1556 | 0.0158 |
| 242382_at   |           | Homo sapiens; clone IMAGE:5539086; mRNA                                                             | -0.1236 | 0.0154 |
| 242386_x_at |           |                                                                                                     | -0.2376 | 0.0052 |
| 242399_at   |           |                                                                                                     | -0.181  | 0.0242 |
| 242411_at   | ARL10     | ADP-ribosylation factor-like 10                                                                     | -0.1299 | 0.0215 |
| 242419_at   |           | Transcribed locus; strongly similar to XP_530243.1 hypothetical protein XP_530243 [Pan troglodytes] | -0.1309 | 0.0109 |
| 242435_at   | PDE4A     | Phosphodiesterase 4A; cAMP-specific (phosphodiesterase E2 dunce homolog; Drosophila)                | -0.2367 | 0.003  |
| 242454_at   |           | Transcribed locus                                                                                   | -0.1936 | 0.0158 |
| 242461_at   |           |                                                                                                     | -0.4161 | 0.0192 |
| 242464_at   |           | Transcribed locus                                                                                   | -0.1032 | 0.0327 |
| 242489_at   |           | Transcribed locus                                                                                   | -0.2842 | 0.002  |
| 242495_at   |           |                                                                                                     | -0.1153 | 0.0288 |
| 242496_at   |           | CDNA FLJ23728 fis; clone HEP14243                                                                   | -0.656  | 0.0005 |
| 242501_at   |           | Transcribed locus                                                                                   | -0.1962 | 0.007  |
| 242505_at   |           | Transcribed locus                                                                                   | -0.2438 | 0.0137 |
| 242515_x_at | C11orf17  | chromosome 11 open reading frame 17                                                                 | -0.6811 | 0.0095 |

|             |          |                                                                                                                                                                                                                                                                                                                                                                       |         |        |
|-------------|----------|-----------------------------------------------------------------------------------------------------------------------------------------------------------------------------------------------------------------------------------------------------------------------------------------------------------------------------------------------------------------------|---------|--------|
| 242524_at   | CBLN4    | cerebellin 4 precursor                                                                                                                                                                                                                                                                                                                                                | -3.4275 | 0      |
| 242528_at   | HOXA4    | Homeobox A4                                                                                                                                                                                                                                                                                                                                                           | -0.278  | 0.0001 |
| 242541_at   | ABCA9    | ATP-binding cassette; sub-family A (ABC1); member 9                                                                                                                                                                                                                                                                                                                   | -0.4878 | 0.0001 |
| 242545_at   | TTLL11   | tubulin tyrosine ligase-like family; member 11                                                                                                                                                                                                                                                                                                                        | -0.4155 | 0.0001 |
| 242548_x_at | ANKRD37  | ankyrin repeat domain 37                                                                                                                                                                                                                                                                                                                                              | -0.1756 | 0.0127 |
| 242551_at   |          |                                                                                                                                                                                                                                                                                                                                                                       | -1.2638 | 0.001  |
| 242553_at   | ABCC3    | ATP-binding cassette; sub-family C (CFTR/MRP); member 3                                                                                                                                                                                                                                                                                                               | -0.4042 | 0.0272 |
| 242566_at   | VASH1    | Vasohibin 1                                                                                                                                                                                                                                                                                                                                                           | -0.1943 | 0.0159 |
| 242581_at   | MAP3K15  | Mitogen-activated protein kinase kinase kinase 15                                                                                                                                                                                                                                                                                                                     | -0.4635 | 0      |
| 242582_at   |          | Transcribed locus                                                                                                                                                                                                                                                                                                                                                     | -0.1182 | 0.0293 |
| 242600_at   | FRMD3    | FERM domain containing 3                                                                                                                                                                                                                                                                                                                                              | -0.3613 | 0.0081 |
| 242632_at   | FGD2     | FYVE; RhoGEF and PH domain containing 2                                                                                                                                                                                                                                                                                                                               | -0.1194 | 0.0149 |
| 242638_at   |          | CDNA FLJ27401 fis; clone WMC03071                                                                                                                                                                                                                                                                                                                                     | -0.1561 | 0.004  |
| 242642_at   |          |                                                                                                                                                                                                                                                                                                                                                                       | -0.8208 | 0      |
| 242651_at   |          | Transcribed locus                                                                                                                                                                                                                                                                                                                                                     | -0.8916 | 0      |
| 242657_at   |          | Transcribed locus                                                                                                                                                                                                                                                                                                                                                     | -0.5585 | 0.0006 |
| 242661_x_at | ALS2CR12 | amyotrophic lateral sclerosis 2 (juvenile) chromosome region; candidate 12                                                                                                                                                                                                                                                                                            | -0.1263 | 0.0281 |
| 242676_at   |          | Transcribed locus                                                                                                                                                                                                                                                                                                                                                     | -0.1359 | 0.0178 |
| 242680_at   |          | Transcribed locus                                                                                                                                                                                                                                                                                                                                                     | -5.6818 | 0      |
| 242686_at   | STARD13  | StAR-related lipid transfer (START) domain containing 13                                                                                                                                                                                                                                                                                                              | -0.1928 | 0.0065 |
| 242712_x_at | RANBP2   | RAN binding protein 2, RANBP2-like and GRIP domain containing 1, RANBP2-like and GRIP domain containing 2, RANBP2-like and GRIP domain containing 3, RANBP2-like and GRIP domain containing 4, RANBP2-like and GRIP domain containing 5, RANBP2-like and GRIP domain containing 6, RANBP2-like and GRIP domain containing 7, RANBP2-like and GRIP domain containing 8 | -2.4851 | 0      |
| 242714_at   |          |                                                                                                                                                                                                                                                                                                                                                                       | -0.8838 | 0      |
| 242716_at   | SLC30A1  | solute carrier family 30 (zinc transporter); member 1                                                                                                                                                                                                                                                                                                                 | -0.1536 | 0.0008 |
| 242720_at   | ITIH4    | inter-alpha (globulin) inhibitor H4 (plasma Kallikrein-sensitive glycoprotein)                                                                                                                                                                                                                                                                                        | -0.5383 | 0.0024 |
| 242731_x_at |          | Transcribed locus                                                                                                                                                                                                                                                                                                                                                     | -0.1963 | 0.0141 |
| 242736_at   |          |                                                                                                                                                                                                                                                                                                                                                                       | -0.5039 | 0.0006 |
| 242747_at   |          |                                                                                                                                                                                                                                                                                                                                                                       | -0.2489 | 0.0023 |
| 242751_at   |          | Transcribed locus                                                                                                                                                                                                                                                                                                                                                     | -1.1464 | 0.0075 |

|             |           |                                                                                                                              |         |        |
|-------------|-----------|------------------------------------------------------------------------------------------------------------------------------|---------|--------|
| 242754_at   |           | Transcribed locus; strongly similar to XP_001101513.1 similar to ribosomal protein S12 [Macaca mulatta]                      | -0.1332 | 0.0354 |
| 242763_at   |           |                                                                                                                              | -0.232  | 0.0001 |
| 242779_at   |           | Transcribed locus                                                                                                            | -0.272  | 0.0012 |
| 242794_at   | MAML3     | mastermind-like 3 (Drosophila)                                                                                               | -1.3301 | 0.0273 |
| 242803_at   |           | Transcribed locus                                                                                                            | -0.268  | 0.0082 |
| 242809_at   | IL1RL1    | Interleukin 1 receptor-like 1                                                                                                | -2.6653 | 0      |
| 242814_at   | SERPINB9  | serpin peptidase inhibitor; clade B (ovalbumin); member 9                                                                    | -2.8322 | 0.0001 |
| 242821_at   | C9orf93   | chromosome 9 open reading frame 93                                                                                           | -0.1332 | 0.0304 |
| 242832_at   | PER1      | period homolog 1 (Drosophila)                                                                                                | -0.2782 | 0      |
| 242835_s_at | LOC728730 | Hypothetical protein LOC728730                                                                                               | -0.2475 | 0.0199 |
| 242836_at   |           | Transcribed locus                                                                                                            | -5.3061 | 0      |
| 242845_at   |           | MRNA; cDNA DKFZp564B213 (from clone DKFZp564B213)                                                                            | -0.1622 | 0.0113 |
| 242846_at   |           | Transcribed locus                                                                                                            | -0.408  | 0.0052 |
| 242868_at   |           | Transcribed locus                                                                                                            | -1.2281 | 0.0268 |
| 242871_at   | PAQR5     | progesterin and adipoQ receptor family member V                                                                              | -2.1463 | 0.005  |
| 242901_at   |           | MRNA; cDNA DKFZp686G24244 (from clone DKFZp686G24244)                                                                        | -0.1275 | 0.0499 |
| 242905_at   | PNO1      | partner of NOB1 homolog (S. cerevisiae)                                                                                      | -0.8391 | 0.0013 |
| 242907_at   |           |                                                                                                                              | -1.8348 | 0.0044 |
| 242931_at   |           |                                                                                                                              | -1.6592 | 0.0087 |
| 242938_s_at | FOXK2     | forkhead box K2                                                                                                              | -0.5515 | 0.0127 |
| 242941_x_at | TBX1      | T-box 1                                                                                                                      | -0.168  | 0.0009 |
| 242960_at   |           | Transcribed locus                                                                                                            | -0.4517 | 0      |
| 242978_x_at |           | Transcribed locus                                                                                                            | -0.4422 | 0.0025 |
| 242987_x_at |           | Transcribed locus                                                                                                            | -0.1535 | 0.0182 |
| 242992_at   | ZNF551    | Zinc finger protein 551                                                                                                      | -0.1361 | 0.0154 |
| 242994_at   |           | Transcribed locus; strongly similar to XP_001105075.1 similar to nardilysin (N-arginine dibasic convertase) [Macaca mulatta] | -0.1797 | 0.0209 |
| 243010_at   | MSI2      | musashi homolog 2 (Drosophila)                                                                                               | -2.0023 | 0.0001 |
| 243012_at   |           | Transcribed locus                                                                                                            | -0.4293 | 0.0015 |
| 243022_at   |           | Transcribed locus                                                                                                            | -0.104  | 0.0477 |
| 243034_at   |           | Transcribed locus                                                                                                            | -0.2716 | 0      |
| 243039_at   |           |                                                                                                                              | -2.349  | 0      |
| 243041_s_at |           | Transcribed locus                                                                                                            | -0.6959 | 0.0032 |
| 243050_at   |           | Transcribed locus                                                                                                            | -0.1776 | 0.0269 |
| 243052_at   | MOBK2C    | MOB1; Mps One Binder kinase activator-like 2C (yeast)                                                                        | -0.1601 | 0.0197 |
| 243053_x_at |           | CDNA clone IMAGE:5274492                                                                                                     | -0.1684 | 0.0459 |
| 243056_at   | C12orf60  | Chromosome 12 open reading frame 60                                                                                          | -1.4316 | 0      |

|             |              |                                                                                                            |         |        |
|-------------|--------------|------------------------------------------------------------------------------------------------------------|---------|--------|
| 243066_at   | NPL          | N-acetylneuraminate pyruvate lyase (dihydrodipicolinate synthase)                                          | -0.1226 | 0.0436 |
| 243083_at   | LOC401351    | hypothetical gene supported by BC040831                                                                    | -0.1081 | 0.0323 |
| 243085_at   |              |                                                                                                            | -0.1263 | 0.049  |
| 243087_at   | WDR63        | WD repeat domain 63                                                                                        | -2.6057 | 0.0002 |
| 243095_at   |              | Transcribed locus                                                                                          | -0.1751 | 0.0125 |
| 243096_at   |              | Transcribed locus                                                                                          | -0.1892 | 0      |
| 243099_at   | NFAM1        | NFAT activating protein with ITAM motif 1                                                                  | -0.3242 | 0.0035 |
| 243104_at   |              | Transcribed locus                                                                                          | -0.1656 | 0.0461 |
| 243107_at   |              |                                                                                                            | -0.1452 | 0.0333 |
| 243120_at   |              |                                                                                                            | -0.1521 | 0.0452 |
| 243123_at   |              | Transcribed locus                                                                                          | -0.1548 | 0.0152 |
| 243129_at   |              |                                                                                                            | -1.5418 | 0      |
| 243137_at   |              | Transcribed locus                                                                                          | -0.1204 | 0.0052 |
| 243138_at   |              | Transcribed locus                                                                                          | -0.1593 | 0.0097 |
| 243151_at   | ANKRD42      | Ankyrin repeat domain 42                                                                                   | -0.1687 | 0.001  |
| 243157_at   |              | Transcribed locus                                                                                          | -0.1231 | 0.0148 |
| 243176_at   |              | CDNA FLJ30090 fis; clone BNGH41000015                                                                      | -1.1135 | 0.0001 |
| 243177_at   |              |                                                                                                            | -0.1794 | 0.0097 |
| 243185_at   |              | Full-length cDNA clone CS0DL010YP06 of B cells (Ramos cell line) Cot 25-normalized of Homo sapiens (human) | -0.1768 | 0.021  |
| 243201_at   | HNRPH2       | Heterogeneous nuclear ribonucleoprotein H2 (H')                                                            | -0.3295 | 0.0212 |
| 243202_at   | FAM102B      | Family with sequence similarity 102; member B                                                              | -0.1505 | 0.0153 |
| 243208_x_at | MGC33407     | hypothetical protein MGC33407                                                                              | -0.21   | 0.0053 |
| 243213_at   | STAT3        | signal transducer and activator of transcription 3 (acute-phase response factor)                           | -0.6387 | 0      |
| 243225_at   | LOC283481    | hypothetical protein LOC283481                                                                             | -0.6121 | 0      |
| 243242_at   |              | Transcribed locus                                                                                          | -0.1221 | 0.0221 |
| 243256_at   | MKNK1        | MAP kinase interacting serine/threonine kinase 1                                                           | -1.1872 | 0.0008 |
| 243258_at   | KIAA0664     | KIAA0664                                                                                                   | -0.2294 | 0.0292 |
| 243259_at   |              | Transcribed locus                                                                                          | -0.3339 | 0.0019 |
| 243261_at   | LOC154822    | hypothetical protein LOC154822                                                                             | -0.2149 | 0.0139 |
| 243269_s_at | C9orf144     | chromosome 9 open reading frame 144                                                                        | -0.2424 | 0.0023 |
| 243291_at   |              | Transcribed locus                                                                                          | -0.2098 | 0.0119 |
| 243296_at   | PBEF1        | Pre-B-cell colony enhancing factor 1                                                                       | -2.0322 | 0.0009 |
| 243307_at   |              | Transcribed locus                                                                                          | -0.1384 | 0.0239 |
| 243311_at   | RP5-1103G7.6 | defensin; beta 32                                                                                          | -0.1453 | 0.0338 |
| 243320_at   |              |                                                                                                            | -0.1363 | 0.0193 |

|             |           |                                                                                                                                                                                                                                                  |         |        |
|-------------|-----------|--------------------------------------------------------------------------------------------------------------------------------------------------------------------------------------------------------------------------------------------------|---------|--------|
| 243328_at   |           | Transcribed locus; strongly similar to XP_531234.1 hypothetical protein XP_531234 [Pan troglodytes]                                                                                                                                              | -0.1157 | 0.0332 |
| 243344_at   |           | Homo sapiens; clone IMAGE:5194137; mRNA                                                                                                                                                                                                          | -0.1679 | 0.01   |
| 243349_at   | KIAA1324  | KIAA1324                                                                                                                                                                                                                                         | -0.1202 | 0.008  |
| 243357_at   | NEGR1     | neuronal growth regulator 1                                                                                                                                                                                                                      | -0.9131 | 0      |
| 243372_at   | HSPD1     | heat shock 60kDa protein 1 (chaperonin), similar to 60 kDa heat shock protein; mitochondrial precursor (Hsp60) (60 kDa chaperonin) (CPN60) (Heat shock protein 60) (HSP-60) (Mitochondrial matrix protein P1) (P60 lymphocyte protein) (HuCHA60) | -1.0199 | 0.0261 |
| 243383_at   |           | Transcribed locus                                                                                                                                                                                                                                | -0.2328 | 0.0031 |
| 243394_at   |           |                                                                                                                                                                                                                                                  | -0.1702 | 0.0446 |
| 243395_at   |           | Transcribed locus                                                                                                                                                                                                                                | -2.6894 | 0      |
| 243399_at   |           | Transcribed locus; strongly similar to XP_515434.1 hypothetical protein XP_515434 [Pan troglodytes]                                                                                                                                              | -0.2214 | 0.0016 |
| 243402_at   | LOC643406 | hypothetical protein LOC643406                                                                                                                                                                                                                   | -0.1927 | 0.0162 |
| 243406_at   | LOC440268 | hypothetical LOC440268                                                                                                                                                                                                                           | -0.1986 | 0.0004 |
| 243408_at   |           | Transcribed locus                                                                                                                                                                                                                                | -0.1323 | 0.0402 |
| 243415_at   |           |                                                                                                                                                                                                                                                  | -0.1458 | 0.004  |
| 243418_at   |           |                                                                                                                                                                                                                                                  | -0.1702 | 0.0208 |
| 243425_at   |           | Transcribed locus                                                                                                                                                                                                                                | -0.1925 | 0.0068 |
| 243429_at   |           | Transcribed locus                                                                                                                                                                                                                                | -0.1499 | 0.0209 |
| 243451_at   |           | Transcribed locus                                                                                                                                                                                                                                | -0.1374 | 0.0113 |
| 243452_at   | LOC646778 | hypothetical LOC646778                                                                                                                                                                                                                           | -0.2871 | 0.0015 |
| 243459_x_at |           |                                                                                                                                                                                                                                                  | -0.1301 | 0.0497 |
| 243467_at   |           | CDNA FLJ46553 fis; clone THYMU3038879                                                                                                                                                                                                            | -0.1138 | 0.0089 |
| 243472_at   |           | Transcribed locus                                                                                                                                                                                                                                | -0.1452 | 0.0318 |
| 243493_at   |           | Transcribed locus                                                                                                                                                                                                                                | -0.1409 | 0.0019 |
| 243508_at   | C20orf196 | chromosome 20 open reading frame 196                                                                                                                                                                                                             | -0.1915 | 0.0096 |
| 243526_at   | WDR86     | WD repeat domain 86                                                                                                                                                                                                                              | -0.3961 | 0      |
| 243531_at   | ORAOV1    | oral cancer overexpressed 1                                                                                                                                                                                                                      | -0.2834 | 0.0012 |
| 243544_at   | ADH1B     | Alcohol dehydrogenase IB (class I); beta polypeptide                                                                                                                                                                                             | -0.1209 | 0.0152 |
| 243553_x_at |           | Transcribed locus                                                                                                                                                                                                                                | -0.2129 | 0.0104 |
| 243564_at   |           | CDNA FLJ43039 fis; clone BRTHA3003023                                                                                                                                                                                                            | -0.1177 | 0.0386 |
| 243570_at   |           |                                                                                                                                                                                                                                                  | -0.3649 | 0.0066 |
| 243575_at   | MAST4     | microtubule associated serine/threonine kinase family member 4                                                                                                                                                                                   | -0.1829 | 0.0107 |
| 243579_at   | MSI2      | musashi homolog 2 (Drosophila)                                                                                                                                                                                                                   | -2.1729 | 0      |

|             |           |                                                                                              |         |        |
|-------------|-----------|----------------------------------------------------------------------------------------------|---------|--------|
| 243580_at   | GNA14     | guanine nucleotide binding protein (G protein); alpha 14                                     | -0.2736 | 0      |
| 243596_at   |           | Transcribed locus                                                                            | -0.1353 | 0.01   |
| 243607_at   |           | Transcribed locus                                                                            | -0.1054 | 0.0354 |
| 243614_s_at | PRODH2    | proline dehydrogenase (oxidase) 2                                                            | -0.25   | 0.0058 |
| 243615_at   |           | Transcribed locus                                                                            | -0.1263 | 0.0303 |
| 243616_at   |           | Transcribed locus                                                                            | -0.1367 | 0.037  |
| 243622_at   | LOC145694 | hypothetical protein LOC145694                                                               | -0.1575 | 0.0035 |
| 243634_at   |           | Full-length cDNA clone CS0DE011YO20 of Placenta of Homo sapiens (human)                      | -0.8303 | 0.0026 |
| 243642_x_at |           |                                                                                              | -0.1102 | 0.0228 |
| 243653_at   | SHROOM3   | Shroom family member 3                                                                       | -0.2049 | 0.0033 |
| 243659_at   |           | CDNA FLJ36210 fis; clone THYMU2000155                                                        | -1.3285 | 0      |
| 243669_s_at | PRAP1     | proline-rich acidic protein 1                                                                | -0.2436 | 0.0017 |
| 243680_at   |           | Transcribed locus; strongly similar to XP_001152474.1 hypothetical protein [Pan troglodytes] | -0.2782 | 0.0279 |
| 243697_at   |           | Transcribed locus                                                                            | -0.1846 | 0.0033 |
| 243698_at   |           | Transcribed locus                                                                            | -0.2017 | 0.0055 |
| 243700_x_at | FAM47A    | family with sequence similarity 47; member A                                                 | -0.1146 | 0.0108 |
| 243717_at   | EPHA10    | EPH receptor A10                                                                             | -0.1069 | 0.0241 |
| 243719_at   | STK19     | serine/threonine kinase 19                                                                   | -0.732  | 0      |
| 243721_at   |           | Transcribed locus; strongly similar to XP_001171836.1 hypothetical protein [Pan troglodytes] | -0.1355 | 0.0048 |
| 243724_at   |           | Transcribed locus                                                                            | -0.3608 | 0.0004 |
| 243725_at   |           | Transcribed locus                                                                            | -0.1112 | 0.0091 |
| 243726_at   |           | Transcribed locus                                                                            | -0.1642 | 0.0152 |
| 243732_at   |           | Transcribed locus                                                                            | -0.1183 | 0.0277 |
| 243740_at   |           | Transcribed locus                                                                            | -0.1877 | 0.0431 |
| 243741_at   |           | Transcribed locus                                                                            | -0.1136 | 0.023  |
| 243744_at   | LOC348751 | Hypothetical protein LOC348751                                                               | -0.1059 | 0.0319 |
| 243757_at   |           | Transcribed locus                                                                            | -0.1343 | 0.0247 |
| 243769_at   |           |                                                                                              | -0.1364 | 0.0401 |
| 243778_at   |           | Transcribed locus                                                                            | -0.1169 | 0.0186 |
| 243782_at   |           | Transcribed locus                                                                            | -0.2284 | 0.0019 |
| 243783_at   |           | CDNA FLJ36183 fis; clone TESTI2026854                                                        | -0.1328 | 0.0484 |
| 243803_at   | LOC643037 | hypothetical LOC643037                                                                       | -0.1005 | 0.0275 |
| 243809_at   | HEL308    | DNA helicase HEL308                                                                          | -0.4532 | 0.0023 |
| 243814_at   | ZMYND8    | Zinc finger; MYND-type containing 8                                                          | -0.2848 | 0.003  |
| 243825_at   | BCL6B     | B-cell CLL/lymphoma 6; member B (zinc finger protein)                                        | -0.1731 | 0.015  |
| 243831_at   |           | Transcribed locus                                                                            | -0.1277 | 0.0175 |

|             |           |                                                                                             |         |        |
|-------------|-----------|---------------------------------------------------------------------------------------------|---------|--------|
| 243837_x_at |           | Transcribed locus                                                                           | -0.1144 | 0.0195 |
| 243842_at   |           | Transcribed locus                                                                           | -0.461  | 0.0062 |
| 243843_at   | CG018     | hypothetical gene CG018                                                                     | -0.2709 | 0.0072 |
| 243845_at   | HSPD1     | Heat shock 60kDa protein 1 (chaperonin)                                                     | -0.2072 | 0.003  |
| 243847_at   |           | Transcribed locus                                                                           | -0.1723 | 0.003  |
| 243848_at   |           | Transcribed locus                                                                           | -0.1826 | 0.0091 |
| 243879_at   |           | CDNA FLJ36891 fis; clone BRACE2000368                                                       | -0.4094 | 0      |
| 243881_at   |           | CDNA FLJ45325 fis; clone BRHIP3006717                                                       | -0.2218 | 0.0366 |
| 243883_at   | MMP15     | matrix metalloproteinase 15 (membrane-inserted)                                             | -0.1404 | 0.0232 |
| 243884_at   | C13orf26  | chromosome 13 open reading frame 26                                                         | -0.1523 | 0.0009 |
| 243900_at   | WDR38     | WD repeat domain 38                                                                         | -0.1681 | 0.0035 |
| 243941_at   |           | Transcribed locus                                                                           | -0.1241 | 0.0242 |
| 243943_x_at | C6orf52   | chromosome 6 open reading frame 52                                                          | -0.3012 | 0.0177 |
| 243944_at   |           |                                                                                             | -0.1921 | 0.0045 |
| 243947_s_at |           | Transcribed locus                                                                           | -0.3202 | 0.0019 |
| 243951_at   | ABCB1     | ATP-binding cassette; sub-family B (MDR/TAP); member 1                                      | -3.1225 | 0      |
| 243955_at   |           | Transcribed locus                                                                           | -0.1636 | 0.027  |
| 243978_at   | C20orf175 | chromosome 20 open reading frame 175                                                        | -0.1527 | 0.0134 |
| 243979_at   |           | Transcribed locus                                                                           | -0.1175 | 0.0195 |
| 243990_at   |           | Transcribed locus                                                                           | -0.166  | 0.0011 |
| 243994_at   | LOC730168 | hypothetical protein LOC730168                                                              | -0.1164 | 0.0149 |
| 244012_x_at |           |                                                                                             | -0.2657 | 0.0226 |
| 244023_at   | SYK       | spleen tyrosine kinase                                                                      | -0.4336 | 0.006  |
| 244025_at   |           |                                                                                             | -0.3721 | 0.0057 |
| 244026_at   |           | Transcribed locus                                                                           | -2.3764 | 0      |
| 244050_at   | PTPLAD2   | protein tyrosine phosphatase-like A domain containing 2                                     | -3.1056 | 0      |
| 244057_s_at | C10orf72  | chromosome 10 open reading frame 72                                                         | -0.5312 | 0.0463 |
| 244064_at   |           | Transcribed locus                                                                           | -0.1463 | 0.0314 |
| 244079_at   |           | Transcribed locus; strongly similar to XP_001104786.1 hypothetical protein [Macaca mulatta] | -0.1271 | 0.0081 |
| 244088_at   |           | Transcribed locus                                                                           | -0.1444 | 0.045  |
| 244089_at   | MYC       | V-myc myelocytomatosis viral oncogene homolog (avian)                                       | -0.2365 | 0.0019 |
| 244095_at   |           |                                                                                             | -0.1613 | 0.0474 |
| 244103_at   | C1orf55   | chromosome 1 open reading frame 55                                                          | -0.4184 | 0.0428 |
| 244108_at   | SYNPO2    | synaptopodin 2                                                                              | -0.2793 | 0.0028 |
| 244109_at   | WDR38     | WD repeat domain 38                                                                         | -0.1509 | 0.0021 |
| 244120_at   | LOC340178 | hypothetical protein LOC340178                                                              | -0.1619 | 0.0134 |

|             |           |                                                                                                                                                  |         |        |
|-------------|-----------|--------------------------------------------------------------------------------------------------------------------------------------------------|---------|--------|
| 244123_at   |           | Transcribed locus                                                                                                                                | -0.1461 | 0.0288 |
| 244126_at   | PEX11G    | peroxisomal biogenesis factor 11 gamma                                                                                                           | -0.517  | 0.0001 |
| 244136_at   |           | CDNA clone IMAGE:5272580                                                                                                                         | -0.1884 | 0.0061 |
| 244141_at   |           | Full length insert cDNA clone ZC19C04                                                                                                            | -0.1064 | 0.0146 |
| 244147_at   |           | Transcribed locus                                                                                                                                | -0.2364 | 0      |
| 244152_at   |           | Transcribed locus                                                                                                                                | -0.1399 | 0.0286 |
| 244166_at   | APLN      | Apelin; AGTRL1 ligand                                                                                                                            | -1.9518 | 0.0001 |
| 244176_at   | LOC401913 | hypothetical LOC401913                                                                                                                           | -0.1807 | 0.006  |
| 244191_at   | RPLP1     | Ribosomal protein; large; P1                                                                                                                     | -0.1895 | 0.0322 |
| 244192_x_at |           |                                                                                                                                                  | -0.1492 | 0.0117 |
| 244199_at   | TWF1      | Twinfilin; actin-binding protein; homolog 1 (Drosophila)                                                                                         | -0.2578 | 0.0047 |
| 244209_at   | LOC282992 | hypothetical protein LOC282992                                                                                                                   | -0.1943 | 0.0209 |
| 244215_at   |           | Transcribed locus                                                                                                                                | -0.2223 | 0.0039 |
| 244218_at   |           |                                                                                                                                                  | -0.23   | 0.0009 |
| 244229_at   | PARVG     | Parvin; gamma                                                                                                                                    | -0.1349 | 0.0127 |
| 244231_at   | LOC149684 | hypothetical protein LOC149684                                                                                                                   | -0.3261 | 0      |
| 244232_at   |           |                                                                                                                                                  | -0.1483 | 0.0022 |
| 244239_at   |           | Full length insert cDNA YN63H06                                                                                                                  | -0.3792 | 0.0155 |
| 244251_at   | LCP2      | Lymphocyte cytosolic protein 2 (SH2 domain containing leukocyte protein of 76kDa)                                                                | -0.256  | 0.0498 |
| 244264_at   | KLRG2     | killer cell lectin-like receptor subfamily G; member 2                                                                                           | -0.205  | 0.0064 |
| 244266_at   | AKR1C2    | Aldo-keto reductase family 1; member C2 (dihydrodiol dehydrogenase 2; bile acid binding protein; 3-alpha hydroxysteroid dehydrogenase; type III) | -0.1492 | 0.0036 |
| 244294_at   |           | CDNA FLJ26260 fis; clone DMC05193                                                                                                                | -0.3739 | 0.0087 |
| 244320_at   | NHLRC2    | NHL repeat containing 2                                                                                                                          | -0.2315 | 0.011  |
| 244321_at   | PGAP1     | GPI deacylase                                                                                                                                    | -2.5441 | 0      |
| 244329_at   |           |                                                                                                                                                  | -0.1633 | 0.0296 |
| 244339_at   |           | Transcribed locus                                                                                                                                | -0.1276 | 0.0052 |
| 244361_at   | LOC728981 | hypothetical protein LOC728981                                                                                                                   | -0.1087 | 0.0053 |
| 244368_x_at |           | MRNA; cDNA DKFZp451K063 (from clone DKFZp451K063)                                                                                                | -0.296  | 0.0031 |
| 244379_at   |           |                                                                                                                                                  | -0.1815 | 0.0225 |
| 244381_at   |           | Transcribed locus                                                                                                                                | -0.1534 | 0.0042 |
| 244388_at   |           | Transcribed locus                                                                                                                                | -0.1623 | 0.0011 |
| 244394_at   |           | Transcribed locus                                                                                                                                | -0.1677 | 0.0073 |
| 244408_at   |           | Transcribed locus                                                                                                                                | -0.1932 | 0.0195 |
| 244410_at   | PKHD1     | polycystic kidney and hepatic disease 1 (autosomal recessive)                                                                                    | -0.1431 | 0.0127 |
| 244430_at   | LOC201164 | Similar to CG12314 gene product                                                                                                                  | -0.1131 | 0.0328 |
| 244432_at   |           | Transcribed locus                                                                                                                                | -0.1336 | 0.0205 |



|             |                  |                                                                                                               |         |        |
|-------------|------------------|---------------------------------------------------------------------------------------------------------------|---------|--------|
| 244434_at   |                  |                                                                                                               | -0.8765 | 0.0008 |
| 244446_at   |                  | CDNA clone IMAGE:5266114                                                                                      | -0.1178 | 0.0273 |
| 244448_at   | TMEM17           | Transmembrane protein 17                                                                                      | -0.135  | 0.0064 |
| 244453_at   | ANKRD53          | ankyrin repeat domain 53                                                                                      | -0.3182 | 0.0002 |
| 244467_at   | C22:CTA-250D10.9 | transmembrane protein 46-like                                                                                 | -2.8791 | 0.0002 |
| 244489_at   |                  |                                                                                                               | -0.347  | 0.0005 |
| 244494_at   | ZDHHC1           | Zinc finger; DHHC-type containing 1                                                                           | -0.227  | 0.0246 |
| 244499_at   | CCDC131          | coiled-coil domain containing 131                                                                             | -0.9589 | 0      |
| 244524_at   |                  | Transcribed locus                                                                                             | -0.2437 | 0.0299 |
| 244533_at   |                  |                                                                                                               | -0.6582 | 0.0122 |
| 244537_at   |                  |                                                                                                               | -0.272  | 0.0171 |
| 244543_s_at |                  | Homo sapiens; clone IMAGE:3910487; mRNA                                                                       | -0.1699 | 0.0054 |
| 244545_at   |                  | CDNA clone IMAGE:5296106                                                                                      | -0.134  | 0.0252 |
| 244549_at   | FEZ2             | Fasciculation and elongation protein zeta 2 (zygin II)                                                        | -0.1876 | 0.0054 |
| 244555_at   |                  | Transcribed locus; moderately similar to XP_001093747.1 tumor protein p53 binding protein; 2 [Macaca mulatta] | -0.3997 | 0.0011 |
| 244556_at   | LCP2             | Lymphocyte cytosolic protein 2 (SH2 domain containing leukocyte protein of 76kDa)                             | -0.2501 | 0.0018 |
| 244562_s_at |                  |                                                                                                               | -0.1858 | 0.0017 |
| 244564_at   | FLJ37638         | Hypothetical gene supported by AK094957                                                                       | -0.1708 | 0.0119 |
| 244571_s_at | TTC12            | Tetratricopeptide repeat domain 12                                                                            | -0.1865 | 0.0489 |
| 244572_at   | KY               | kyphoscoliosis peptidase                                                                                      | -0.7132 | 0.0004 |
| 244573_at   |                  | MRNA full length insert cDNA clone EUROIMAGE 200247                                                           | -0.1711 | 0.0189 |
| 244576_at   |                  | Transcribed locus                                                                                             | -0.1298 | 0.0467 |
| 244578_at   | LCP2             | lymphocyte cytosolic protein 2 (SH2 domain containing leukocyte protein of 76kDa)                             | -0.1821 | 0.006  |
| 244582_at   |                  | Transcribed locus                                                                                             | -0.1026 | 0.0181 |
| 244591_x_at | RNF207           | Ring finger protein 207                                                                                       | -0.2302 | 0.0474 |
| 244598_at   |                  | Full length insert cDNA clone ZD66F04                                                                         | -0.3244 | 0.008  |
| 244600_at   |                  | Transcribed locus; strongly similar to XP_001157267.1 hypothetical protein [Pan troglodytes]                  | -0.1378 | 0.0367 |
| 244617_at   | GPR26            | G protein-coupled receptor 26                                                                                 | -0.2376 | 0.0138 |
| 244626_at   |                  |                                                                                                               | -0.1375 | 0.0036 |
| 244627_at   | DAK              | dihydroxyacetone kinase 2 homolog (S. cerevisiae)                                                             | -2.7187 | 0      |
| 244629_s_at |                  |                                                                                                               | -0.1902 | 0.0157 |
| 244645_at   |                  | Transcribed locus                                                                                             | -0.1188 | 0.0263 |
| 244652_at   |                  | Transcribed locus                                                                                             | -0.1572 | 0.035  |
| 244653_at   | SETD7            | SET domain containing (lysine methyltransferase) 7                                                            | -0.1702 | 0.042  |

|             |          |                                                                                                        |         |        |
|-------------|----------|--------------------------------------------------------------------------------------------------------|---------|--------|
| 244661_at   | SOAT1    | sterol O-acyltransferase (acyl-Coenzyme A: cholesterol acyltransferase) 1                              | -1.3972 | 0.0002 |
| 244672_at   | WDR1     | WD repeat domain 1                                                                                     | -0.169  | 0.0153 |
| 244677_at   |          | Transcribed locus                                                                                      | -1.4045 | 0.001  |
| 244681_at   | C3orf46  | chromosome 3 open reading frame 46                                                                     | -0.1515 | 0.0144 |
| 244701_at   |          | CDNA FLJ33712 fis; clone BRAWH2008255                                                                  | -0.2027 | 0.0091 |
| 244713_at   |          | Transcribed locus                                                                                      | -0.1645 | 0.017  |
| 244717_x_at | SV2B     | synaptic vesicle glycoprotein 2B                                                                       | -0.185  | 0.0038 |
| 244720_at   |          |                                                                                                        | -0.1094 | 0.0219 |
| 244739_at   |          | Transcribed locus                                                                                      | -0.6701 | 0.0014 |
| 244745_at   | RERG     | RAS-like; estrogen-regulated; growth inhibitor                                                         | -2.1106 | 0.0082 |
| 244746_at   | SEMA6D   | Sema domain; transmembrane domain (TM); and cytoplasmic domain; (semaphorin) 6D                        | -0.1495 | 0.0348 |
| 244759_x_at | RNF207   | Ring finger protein 207                                                                                | -0.21   | 0.0008 |
| 244763_at   | MTRF1    | mitochondrial translational release factor 1                                                           | -0.3762 | 0.0037 |
| 244779_at   |          | CDNA FLJ34038 fis; clone FCBBF2005645                                                                  | -2.1285 | 0.0001 |
| 244787_at   |          | Full-length cDNA clone CS0DF030YH04 of Fetal brain of Homo sapiens (human)                             | -0.7167 | 0.0001 |
| 244798_at   |          | Transcribed locus; moderately similar to XP_001099403.1 hypothetical protein [Macaca mulatta]          | -0.1135 | 0.0293 |
| 244800_x_at |          |                                                                                                        | -0.1585 | 0.0216 |
| 244807_at   | C17orf45 | Chromosome 17 open reading frame 45                                                                    | -0.141  | 0.0319 |
| 244815_at   |          | Transcribed locus                                                                                      | -0.2116 | 0.0026 |
| 244824_at   |          | Transcribed locus; strongly similar to XP_001151354.1 hypothetical protein isoform 1 [Pan troglodytes] | -0.1423 | 0.0338 |
| 244827_at   |          |                                                                                                        | -0.1588 | 0.0149 |
| 244828_x_at | LOC92345 | hypothetical protein BC008207                                                                          | -0.8482 | 0.001  |
| 244840_x_at | DOCK4    | dedicator of cytokinesis 4                                                                             | -0.4595 | 0.0189 |
| 244847_at   |          | Transcribed locus                                                                                      | -0.2578 | 0.0219 |
| 244855_at   |          | Transcribed locus                                                                                      | -0.9721 | 0      |
| 244860_at   |          | Transcribed locus                                                                                      | -0.3817 | 0.0364 |
| 244867_at   |          | Transcribed locus                                                                                      | -0.1639 | 0.0024 |
| 244868_at   |          | Transcribed locus                                                                                      | -0.6962 | 0.0001 |
| 244870_at   | TES      | testis derived transcript (3 LIM domains)                                                              | -0.2012 | 0.0078 |
| 244880_at   |          | Transcribed locus                                                                                      | -0.1623 | 0.0275 |
| 244890_at   |          |                                                                                                        | -0.2175 | 0.0023 |
| 31799_at    |          | Clone 24627 mRNA sequence                                                                              | -0.983  | 0      |
| 31837_at    | TMEM112B | transmembrane protein 112B                                                                             | -0.4448 | 0.0385 |
| 31874_at    | GAS2L1   | growth arrest-specific 2 like 1                                                                        | -1.0318 | 0.0147 |

|            |          |                                                                                               |         |        |
|------------|----------|-----------------------------------------------------------------------------------------------|---------|--------|
| 32811_at   | MYO1C    | myosin IC                                                                                     | -0.5886 | 0.0306 |
| 33197_at   | MYO7A    | myosin VIIA                                                                                   | -2.4226 | 0      |
| 33494_at   | ETFDH    | electron-transferring-flavoprotein dehydrogenase                                              | -1.1858 | 0.0002 |
| 336_at     | TBXA2R   | thromboxane A2 receptor                                                                       | -1.2288 | 0.0269 |
| 33767_at   | NEFH     | neurofilament; heavy polypeptide 200kDa                                                       | -1.7365 | 0.0126 |
| 33778_at   | TBC1D22A | TBC1 domain family; member 22A                                                                | -0.7496 | 0.0029 |
| 34206_at   | CENTD2   | centaurin; delta 2                                                                            | -0.7735 | 0.0001 |
| 34846_at   | CAMK2B   | Calcium/calmodulin-dependent protein kinase (CaM kinase) II beta                              | -0.1568 | 0.0205 |
| 35265_at   | FXR2     | fragile X mental retardation; autosomal homolog 2                                             | -0.4097 | 0.0159 |
| 35685_at   | RING1    | ring finger protein 1                                                                         | -0.4006 | 0.0222 |
| 36129_at   | SGSM2    | small G protein signaling modulator 2                                                         | -0.9275 | 0.0096 |
| 36553_at   | ASMTL    | acetylserotonin O-methyltransferase-like                                                      | -0.8483 | 0.008  |
| 36554_at   | ASMTL    | acetylserotonin O-methyltransferase-like                                                      | -1.1913 | 0.0074 |
| 36564_at   | RNF19B   | ring finger protein 19B                                                                       | -1.7107 | 0      |
| 36566_at   | CTNS     | cystinosis; nephropathic                                                                      | -0.7267 | 0.0022 |
| 36711_at   | MAFF     | v-maf musculoaponeurotic fibrosarcoma oncogene homolog F (avian)                              | -2.8389 | 0.0001 |
| 36829_at   | PER1     | period homolog 1 (Drosophila)                                                                 | -1.713  | 0      |
| 36830_at   | MIPEP    | mitochondrial intermediate peptidase                                                          | -0.6159 | 0.0234 |
| 37012_at   | CAPZB    | capping protein (actin filament) muscle Z-line; beta                                          | -0.309  | 0.0033 |
| 37022_at   | PRELP    | proline/arginine-rich end leucine-rich repeat protein                                         | -1.2854 | 0      |
| 37384_at   | PPM1F    | protein phosphatase 1F (PP2C domain containing)                                               | -0.6529 | 0.0007 |
| 37965_at   | PARVB    | parvin; beta                                                                                  | -1.2881 | 0.0011 |
| 37966_at   | PARVB    | parvin; beta                                                                                  | -0.8231 | 0.0135 |
| 38037_at   | HBEGF    | heparin-binding EGF-like growth factor                                                        | -0.6649 | 0.011  |
| 38157_at   | DOM3Z    | dom-3 homolog Z (C. elegans)                                                                  | -1.6063 | 0.0004 |
| 38241_at   | BTN3A3   | butyrophilin; subfamily 3; member A3                                                          | -0.7221 | 0.0442 |
| 38340_at   | HIP1R    | huntingtin interacting protein 1 related, similar to huntingtin interacting protein 1 related | -1.6663 | 0      |
| 38487_at   | STAB1    | stabilin 1                                                                                    | -3.308  | 0      |
| 38918_at   | SOX13    | SRY (sex determining region Y)-box 13                                                         | -0.5621 | 0.0072 |
| 38964_r_at | WAS      | Wiskott-Aldrich syndrome (eczema-thrombocytopenia)                                            | -0.521  | 0.0042 |
| 39817_s_at | C6orf108 | chromosome 6 open reading frame 108                                                           | -1.3328 | 0      |
| 39835_at   | SBF1     | SET binding factor 1                                                                          | -0.791  | 0.0069 |
| 40612_at   | DOPEY1   | dopey family member 1                                                                         | -0.3139 | 0.001  |
| 40665_at   | FMO3     | flavin containing monooxygenase 3                                                             | -4.5933 | 0      |

|            |           |                                                                                                                  |         |        |
|------------|-----------|------------------------------------------------------------------------------------------------------------------|---------|--------|
| 40687_at   | GJA4      | gap junction protein; alpha 4; 37kDa                                                                             | -0.7701 | 0.0016 |
| 40837_at   | TLE2      | transducin-like enhancer of split 2 (E(sp1) homolog; Drosophila)                                                 | -1.8601 | 0      |
| 41047_at   | C9orf16   | chromosome 9 open reading frame 16                                                                               | -0.6458 | 0.0319 |
| 41386_i_at | JMJD3     | jumonji domain containing 3                                                                                      | -0.7659 | 0.0123 |
| 41387_r_at | JMJD3     | jumonji domain containing 3                                                                                      | -0.3798 | 0.0006 |
| 41553_at   | OSGIN2    | Oxidative stress induced growth inhibitor family member 2                                                        | -0.1506 | 0.0012 |
| 43427_at   | ACACB     | acetyl-Coenzyme A carboxylase beta                                                                               | -0.6879 | 0.0408 |
| 44673_at   | SIGLEC1   | sialic acid binding Ig-like lectin 1; sialoadhesin                                                               | -1.4085 | 0.0004 |
| 44702_at   | SYDE1     | synapse defective 1; Rho GTPase; homolog 1 (C. elegans)                                                          | -0.5124 | 0.0156 |
| 46256_at   | SPSB3     | splA/ryanodine receptor domain and SOCS box containing 3                                                         | -0.5649 | 0.0128 |
| 46270_at   | UBAP1     | ubiquitin associated protein 1                                                                                   | -0.8754 | 0      |
| 46665_at   | SEMA4C    | sema domain; immunoglobulin domain (Ig); transmembrane domain (TM) and short cytoplasmic domain; (semaphorin) 4C | -0.6315 | 0.0117 |
| 48030_i_at | C5orf4    | chromosome 5 open reading frame 4                                                                                | -0.7825 | 0.0004 |
| 48031_r_at | C5orf4    | chromosome 5 open reading frame 4                                                                                | -0.7839 | 0.0034 |
| 48106_at   | FLJ20489  | hypothetical protein FLJ20489                                                                                    | -0.8393 | 0.0417 |
| 48117_at   | CCDC101   | coiled-coil domain containing 101                                                                                | -0.4255 | 0.0024 |
| 49327_at   | SIRT3     | sirtuin (silent mating type information regulation 2 homolog) 3 (S. cerevisiae)                                  | -0.2255 | 0.0428 |
| 49452_at   | ACACB     | acetyl-Coenzyme A carboxylase beta                                                                               | -0.7473 | 0.0343 |
| 49878_at   | PEX16     | peroxisomal biogenesis factor 16                                                                                 | -0.3369 | 0.0175 |
| 50400_at   | PAOX      | polyamine oxidase (exo-N4-amino)                                                                                 | -0.2936 | 0.0132 |
| 51146_at   | PIGV      | phosphatidylinositol glycan anchor biosynthesis; class V                                                         | -0.7413 | 0.0001 |
| 51192_at   | SSH3      | slingshot homolog 3 (Drosophila)                                                                                 | -0.2806 | 0.0426 |
| 51774_s_at | LOC222070 | hypothetical protein LOC222070                                                                                   | -0.8263 | 0.0024 |
| 52078_at   | C1orf160  | chromosome 1 open reading frame 160                                                                              | -0.3635 | 0.0403 |
| 52159_at   | HEMK1     | HemK methyltransferase family member 1                                                                           | -0.6098 | 0.0134 |
| 52741_at   | C14orf172 | chromosome 14 open reading frame 172                                                                             | -0.3008 | 0.0028 |
| 53071_s_at | FLJ22222  | hypothetical protein FLJ22222                                                                                    | -0.9442 | 0.0063 |
| 53912_at   | SNX11     | sorting nexin 11                                                                                                 | -0.2095 | 0.0381 |
| 53968_at   | INTS5     | integrator complex subunit 5                                                                                     | -0.3671 | 0.0367 |
| 53987_at   | RANBP10   | RAN binding protein 10                                                                                           | -0.6162 | 0.0467 |
| 53991_at   | DENND2A   | DENN/MADD domain containing 2A                                                                                   | -0.2793 | 0.0041 |
| 54632_at   | THADA     | thyroid adenoma associated                                                                                       | -0.4802 | 0.0308 |
| 55616_at   | PERLD1    | per1-like domain containing 1                                                                                    | -0.3752 | 0.023  |
| 56197_at   | PLSCR3    | phospholipid scramblase 3                                                                                        | -0.5299 | 0.0109 |

|                       |           |                                                        |         |        |
|-----------------------|-----------|--------------------------------------------------------|---------|--------|
| 56256_at              | SIDT2     | SID1 transmembrane family; member 2                    | -0.7382 | 0.0309 |
| 57540_at              | RBKS      | ribokinase                                             | -1.8819 | 0.0006 |
| 58308_at              | TRIM62    | tripartite motif-containing 62                         | -0.81   | 0.0003 |
| 58780_s_at            | FLJ10357  | hypothetical protein FLJ10357                          | -0.6743 | 0.0264 |
| 58900_at              | LOC222070 | hypothetical protein LOC222070                         | -0.6438 | 0.0031 |
| 58916_at              | KCTD14    | potassium channel tetramerisation domain containing 14 | -2.9154 | 0.0004 |
| 59375_at              | MYO15B    | myosin XVB pseudogene                                  | -0.4155 | 0.0252 |
| 59705_at              | SCLY      | selenocysteine lyase                                   | -0.2436 | 0.0006 |
| 60474_at              | C20orf42  | chromosome 20 open reading frame 42                    | -1.5853 | 0.0028 |
| 61297_at              | CASKIN2   | CASK interacting protein 2                             | -0.8421 | 0.0071 |
| 63305_at              | PKNOX2    | PBX/knotted 1 homeobox 2                               | -0.4787 | 0.0001 |
| 64064_at              | GIMAP5    | GTPase; IMAP family member 5                           | -1.1464 | 0      |
| 64438_at              | FLJ22222  | hypothetical protein FLJ22222                          | -0.2504 | 0.0215 |
| 65630_at              | TMEM80    | transmembrane protein 80                               | -1.088  | 0      |
| 78383_at              | TOPORS    | Topoisomerase I binding; arginine/serine-rich          | -0.7482 | 0.0001 |
| 89948_at              | C20orf67  | chromosome 20 open reading frame 67                    | -0.4792 | 0      |
| 89977_at              | FLJ20581  | hypothetical protein FLJ20581                          | -0.6776 | 0.0041 |
| AFFX-M27830_3_at      |           |                                                        | -0.1413 | 0.0073 |
| AFFX-ThrX-3_at        |           |                                                        | -0.1172 | 0.0006 |
| AFFX-r2-Bs-phe-5_at   |           |                                                        | -0.1177 | 0.0237 |
| AFFX-r2-Bs-thr-5_s_at |           |                                                        | -0.1284 | 0.0078 |
| AFFX-r2-Bs-thr-M_s_at |           |                                                        | -0.1761 | 0.0005 |

\*For the difference in expression

**Supplemental Table 4.** Biological processes Significantly ( $P < 0.05$ ) changed in tumors from ACC patients with high *MET* expression relative to tumors with low *MET* expression (dataset GSE10927) as presented in Figure 2a.

|    | BIOLOGICAL PROCESS                                            | CANCER HALLMARK*     | Z SCORE      | P-VALUE     |
|----|---------------------------------------------------------------|----------------------|--------------|-------------|
| 1  | Pyrimidine nucleotide metabolic process                       | 1, 10                | 1.499438242  | 0.04288499  |
| 2  | Negative regulation of progression through mitotic cell cycle | 1,2                  | -1.543647742 | 0.029661017 |
| 3  | Nucleotide metabolic process                                  | 1, 10                | 1.548759866  | 0.044534413 |
| 4  | Activation of NF-kappaB-inducing kinase                       | 1, 2, 5, 6, 7, 9, 10 | 1.586722687  | 0.011650485 |
| 5  | MAPKKK cascade                                                | 1, 5, 6, 7, 9        | 1.612826018  | 0.015180266 |
| 6  | Centrosome organization and biogenesis                        | 1                    | 1.675998689  | 0.009960159 |
| 7  | Activation of MAPK activity                                   | 1, 2, 5, 6, 7, 9     | 1.711905776  | 0.003992016 |
| 8  | Cell death                                                    | 9                    | -1.534593    | 0.018072289 |
| 9  | Focal adhesion formation                                      | 6                    | 1.487977151  | 0.039840637 |
| 10 | Cytoskeleton organization and biogenesis                      | 6                    | 1.526306096  | 0.014403292 |
| 11 | Bone resorption                                               | 6                    | 1.603841653  | 0.025225225 |
| 12 | Cell fate determination                                       | 4                    | -1.595906386 | 0.031180401 |
| 13 | Telomere maintenance                                          | 4                    | 1.74593275   | 0.009140768 |
| 14 | Regulation of angiogenesis                                    | 7                    | -1.550155228 | 0.042769857 |
| 15 | Electron transport                                            | 10                   | 1.395095008  | 0.035885167 |
| 16 | Mitochondrial electron transport; NADH to ubiquinone          | 10                   | 1.546833289  | 0.039215686 |
| 17 | Proton transport                                              | 10                   | 1.58760142   | 0.035087719 |
| 18 | ATP synthesis coupled proton transport                        | 10                   | 1.746648657  | 0.007692308 |
| 19 | Very-long-chain fatty acid metabolic process                  | 10                   | 1.790811372  | 0.004016064 |
| 20 | Nucleotide-excision repair                                    | 8                    | -1.521036899 | 0.024793388 |
| 21 | DNA catabolic process                                         | 11                   | 1.573891525  | 0.022494888 |
| 22 | Chondroitin sulfate biosynthetic process                      | 11                   | 1.570318173  | 0.03649635  |
| 23 | Prostaglandin biosynthetic process                            | 11                   | 1.627218291  | 0.034749035 |
| 24 | Regulation of DNA recombination                               | 11                   | 1.575376444  | 0.037848606 |
| 25 | Mesodermal cell fate determination                            | 11                   | -1.879388652 | 0.002070393 |
| 26 | Tissue development                                            | 11                   | -1.616216646 | 0.018329939 |
| 27 | Adrenal gland development                                     | 11                   | -1.711306937 | 0.006147541 |
| 28 | Adult behavior                                                | 11                   | 1.531725059  | 0.028747433 |
| 29 | B cell receptor signaling pathway                             | 11                   | 1.681609165  | 0.021696252 |
| 30 | Brown fat cell differentiation                                | 11                   | 1.657664146  | 0.005988024 |
| 31 | Cellular defense response                                     | 11                   | 1.819418382  | 0.016494845 |
| 32 | Clathrin cage assembly                                        | 11                   | 1.528170616  | 0.032520325 |
| 33 | Cobalamin transport                                           | 11                   | 1.537551673  | 0.025490196 |
| 34 | Collagen fibril organization                                  | 11                   | -1.569978901 | 0.041575492 |

|    |                                                               |    |              |             |
|----|---------------------------------------------------------------|----|--------------|-------------|
| 35 | Embryonic limb morphogenesis                                  | 11 | -1.628136141 | 0.013015184 |
| 36 | Histone methylation                                           | 11 | -1.664856993 | 0.014198783 |
| 37 | Immune response                                               | 11 | 1.651209711  | 0.029680365 |
| 38 | Leukocyte adhesion                                            | 11 | 1.585713858  | 0.03030303  |
| 39 | Lipid glycosylation                                           | 11 | 1.521583405  | 0.033826638 |
| 40 | Lymph node development                                        | 11 | 1.845834239  | 0           |
| 41 | Melanocyte differentiation                                    | 11 | 1.672639818  | 0.021653543 |
| 42 | Membrane organization and biogenesis                          | 11 | -1.605267216 | 0.010775862 |
| 43 | Mesoderm formation                                            | 11 | -1.555068684 | 0.044303797 |
| 44 | Metanephros development                                       | 11 | -2.017658478 | 0           |
| 45 | Midbrain development                                          | 11 | -1.621103083 | 0.025193798 |
| 46 | Muscle cell differentiation                                   | 11 | -1.723137357 | 0.002159827 |
| 47 | Myoblast fusion                                               | 11 | 1.530277549  | 0.030737705 |
| 48 | N-glycan processing                                           | 11 | 1.567483984  | 0.046601942 |
| 49 | Negative regulation of follicle-stimulating hormone secretion | 11 | -1.560491868 | 0.026262626 |
| 50 | Negative regulation of transcription                          | 11 | -1.414760592 | 0.048       |
| 51 | Neuron recognition                                            | 11 | -1.598478784 | 0.035789474 |
| 52 | Pathogenesis                                                  | 11 | 1.552054324  | 0.040685225 |
| 53 | Phagocytosis; engulfment                                      | 11 | 1.631471838  | 0.002008032 |
| 54 | Phosphoenolpyruvate-dependent sugar phosphotransferase system | 11 | -1.639881228 | 0.008752735 |
| 55 | Post-Golgi vesicle-mediated transport                         | 11 | 1.734607659  | 0.008438819 |
| 56 | Proximal/distal pattern formation                             | 11 | -1.513014572 | 0.045364892 |
| 57 | Receptor-mediated endocytosis                                 | 11 | 1.575458839  | 0.027944112 |
| 58 | Signal complex assembly                                       | 11 | 1.668547312  | 0.004237288 |
| 59 | Skeletal development                                          | 11 | -1.500785369 | 0.040772532 |
| 60 | Sphingomyelin metabolic process                               | 11 | 1.529533146  | 0.038387716 |
| 61 | T-helper 1 type immune response                               | 11 | 1.642101531  | 0.036121673 |
| 62 | Unsaturated fatty acid biosynthetic process                   | 11 | -1.481707191 | 0.047131148 |
| 63 | Vesicle-mediated transport                                    | 11 | 1.478172666  | 0.034482759 |

\* The cancer hallmarks that each biological process may be related to are as follows: 1 = sustained proliferation; 2 = evasion of growth suppression; 3 = escape from immune surveillance; 4 = replicative immortality; 5 = tumor inflammation; 6 = metastasis and invasion; 7 = tumor angiogenesis; 8 = genomic instability and mutation; 9 = resistance to cell death; 10 = deregulating cellular energetics (energy metabolism); 11 = no relation to a cancer hallmark.

**Supplemental Table 5.** Genes significantly ( $P \leq 0.05$ , absolute value of log ratio  $> 0.1$ ) changed in tumors from ACC patients with high *MET* expression compared to those with low *MET* expression (dataset GSE10927).

| PROBE        | GENE SYMBOL | GENE NAME                                                         | FOLD CHANGE (LOG RATIO) | P-VALUE* |
|--------------|-------------|-------------------------------------------------------------------|-------------------------|----------|
| 1053_at      | RFC2        | replication factor C (activator 1) 2; 40kDa                       | 0.7609                  | 0.0197   |
| 1552276_a_at | VPS18       | vacuolar protein sorting 18 homolog (S. cerevisiae)               | 0.1835                  | 0.0082   |
| 1552291_at   | PIGX        | phosphatidylinositol glycan anchor biosynthesis; class X          | 0.5513                  | 0.0291   |
| 1552302_at   | LOC728772   | similar to transmembrane protein 106A, transmembrane protein 106A | 0.4852                  | 0.0452   |
| 1552315_at   | GIMAP1      | GTPase; IMAP family member 1                                      | 0.2057                  | 0.0271   |
| 1552316_a_at | GIMAP1      | GTPase; IMAP family member 1                                      | 1.0108                  | 0.0219   |
| 1552330_at   | MGC16385    | hypothetical protein MGC16385                                     | 1.1341                  | 0.0379   |
| 1552373_s_at | C4orf33     | chromosome 4 open reading frame 33                                | 0.3728                  | 0.0013   |
| 1552381_at   | SRrp35      | serine-arginine repressor protein (35 kDa)                        | 0.293                   | 0.0349   |
| 1552386_at   | C5orf29     | chromosome 5 open reading frame 29                                | 0.3527                  | 0.0098   |
| 1552389_at   | C8orf47     | chromosome 8 open reading frame 47                                | 0.4816                  | 0.0425   |
| 1552390_a_at | C8orf47     | chromosome 8 open reading frame 47                                | 1.1017                  | 0.0428   |
| 1552398_a_at | CLEC12A     | C-type lectin domain family 12; member A                          | 0.206                   | 0.0413   |
| 1552400_a_at | C15orf27    | chromosome 15 open reading frame 27                               | 0.841                   | 0.0296   |
| 1552430_at   | WDR17       | WD repeat domain 17                                               | 0.4173                  | 0.0345   |
| 1552470_a_at | ABHD11      | abhydrolase domain containing 11                                  | 0.4954                  | 0.0063   |
| 1552484_at   | SMCR8       | Smith-Magenis syndrome chromosome region; candidate 8             | 0.1364                  | 0.0364   |
| 1552485_at   | LACTB       | lactamase; beta                                                   | 1.1511                  | 0.0427   |
| 1552486_s_at | LACTB       | lactamase; beta                                                   | 1.3269                  | 0.0135   |
| 1552553_a_at | NLRC4       | NLR family; CARD domain containing 4                              | 0.3826                  | 0.0422   |
| 1552557_a_at | ZDHHC15     | zinc finger; DHHC-type containing 15                              | 0.516                   | 0.0405   |
| 1552573_s_at | MIPOL1      | mirror-image polydactyly 1                                        | 0.4642                  | 0.0316   |
| 1552584_at   | IL12RB1     | interleukin 12 receptor; beta 1                                   | 0.4521                  | 0.0278   |
| 1552612_at   | CDC42SE2    | CDC42 small effector 2                                            | 0.6359                  | 0.0484   |
| 1552651_a_at | RFFL        | ring finger and FYVE-like domain containing 1                     | 0.2428                  | 0.0487   |
| 1552671_a_at | SLC9A7      | solute carrier family 9 (sodium/hydrogen exchanger); member 7     | 0.5016                  | 0.0011   |
| 1552691_at   | ARL11       | ADP-ribosylation factor-like 11                                   | 0.2974                  | 0.0274   |
| 1552696_at   | NIPA1       | non imprinted in Prader-Willi/Angelman syndrome 1                 | 0.6391                  | 0.0047   |
| 1552758_at   | HDAC9       | histone deacetylase 9                                             | 0.1505                  | 0.0375   |
| 1552806_a_at | SIGLEC10    | sialic acid binding Ig-like lectin 10                             | 0.2043                  | 0.0205   |
| 1552868_at   | C19orf23    | chromosome 19 open reading frame 23                               | 0.2104                  | 0.0072   |
| 1552902_a_at | FOXP2       | forkhead box P2                                                   | 0.167                   | 0.0415   |
| 1552964_at   | C10orf93    | chromosome 10 open reading frame 93                               | 0.1091                  | 0.0243   |
| 1552980_at   | HAS3        | hyaluronan synthase 3                                             | 0.2215                  | 0.0077   |
| 1553031_at   | GPR115      | G protein-coupled receptor 115                                    | 0.4651                  | 0.0008   |
| 1553055_a_at | SLFN5       | schlafen family member 5                                          | 0.6394                  | 0.0091   |
| 1553105_s_at | DSG2        | desmoglein 2                                                      | 1.3277                  | 0.0096   |
| 1553158_at   | C3orf34     | chromosome 3 open reading frame 34                                | 0.477                   | 0.014    |
| 1553172_at   | ZNF777      | zinc finger protein 777                                           | 0.4416                  | 0.0179   |
| 1553204_at   | C20orf200   | chromosome 20 open reading frame 200                              | 0.1491                  | 0.0219   |
| 1553207_at   | ARL10       | ADP-ribosylation factor-like 10                                   | 0.1367                  | 0.0205   |
| 1553239_at   | FAM124A     | family with sequence similarity 124A                              | 0.1643                  | 0.0368   |
| 1553269_at   | ZNF718      | zinc finger protein 718                                           | 1.3112                  | 0.0212   |
| 1553297_a_at | CSF3R       | colony stimulating factor 3 receptor (granulocyte)                | 0.6878                  | 0.017    |
| 1553321_a_at | SULT1C4     | sulfotransferase family; cytosolic; 1C; member 4                  | 0.1652                  | 0.0053   |
| 1553351_at   | OTUD7A      | OTU domain containing 7A                                          | 0.2478                  | 0.0362   |
| 1553395_a_at | CD200R1     | CD200 receptor 1                                                  | 0.229                   | 0.0026   |
| 1553409_at   | ADAMTS20    | ADAM metalloproteinase with thrombospondin type 1 motif; 20       | 0.1185                  | 0.0324   |
| 1553533_at   | JPH1        | junctophilin 1                                                    | 0.166                   | 0.0234   |
| 1553622_a_at | FSIP1       | fibrous sheath interacting protein 1                              | 0.1093                  | 0.0475   |



|              |           |                                                                                                                                               |        |        |
|--------------|-----------|-----------------------------------------------------------------------------------------------------------------------------------------------|--------|--------|
| 1553635_s_at | TCTEX1D1  | Tctex1 domain containing 1                                                                                                                    | 0.2331 | 0.0253 |
| 1553646_at   | HDX       | highly divergent homeobox                                                                                                                     | 0.5584 | 0.0046 |
| 1553655_at   | CDC20B    | cell division cycle 20 homolog B ( <i>S. cerevisiae</i> )                                                                                     | 0.1198 | 0.0135 |
| 1553681_a_at | PRF1      | perforin 1 (pore forming protein)                                                                                                             | 0.3312 | 0.0127 |
| 1553743_at   | FAM119A   | family with sequence similarity 119; member A                                                                                                 | 0.6938 | 0.0492 |
| 1553752_at   | C20orf165 | chromosome 20 open reading frame 165                                                                                                          | 0.1282 | 0.0442 |
| 1553778_at   | WBSCR27   | Williams Beuren syndrome chromosome region 27                                                                                                 | 0.2655 | 0.0238 |
| 1553785_at   | RASGEF1B  | RasGEF domain family; member 1B                                                                                                               | 0.1669 | 0.0352 |
| 1553815_a_at |           |                                                                                                                                               | 0.5066 | 0.0122 |
| 1553835_a_at | FLJ35880  | hypothetical protein FLJ35880                                                                                                                 | 0.2427 | 0.0096 |
| 1553876_at   | SAMD3     | sterile alpha motif domain containing 3                                                                                                       | 0.1129 | 0.0165 |
| 1553978_at   | MEF2B     | myocyte enhancer factor 2B                                                                                                                    | 0.9034 | 0.0257 |
| 1553987_at   | C12orf47  | chromosome 12 open reading frame 47                                                                                                           | 0.9626 | 0.0073 |
| 1553994_at   | NT5E      | 5'-nucleotidase; ecto (CD73)                                                                                                                  | 1.1665 | 0.0058 |
| 1553995_a_at | NT5E      | 5'-nucleotidase; ecto (CD73)                                                                                                                  | 0.8174 | 0.0141 |
| 1553997_a_at | ASPHD1    | aspartate beta-hydroxylase domain containing 1                                                                                                | 1.3672 | 0.0356 |
| 1554050_at   | SMPDL3B   | sphingomyelin phosphodiesterase; acid-like 3B                                                                                                 | 0.2739 | 0.0199 |
| 1554077_a_at | TMEM53    | transmembrane protein 53                                                                                                                      | 1.1765 | 0.0293 |
| 1554093_a_at | SNAPC5    | small nuclear RNA activating complex; polypeptide 5; 19kDa                                                                                    | 0.7153 | 0.0101 |
| 1554119_at   | C16orf57  | chromosome 16 open reading frame 57                                                                                                           | 0.1884 | 0.0107 |
| 1554157_a_at | WFDC8     | WAP four-disulfide core domain 8                                                                                                              | 0.1077 | 0.0467 |
| 1554171_at   | ZMYM3     | zinc finger; MYM-type 3                                                                                                                       | 0.5468 | 0.0234 |
| 1554172_a_at | ZMYM3     | zinc finger; MYM-type 3                                                                                                                       | 0.4253 | 0.0246 |
| 1554175_at   | CD300LB   | CD300 molecule-like family member b                                                                                                           | 0.1656 | 0.0271 |
| 1554206_at   | TMLHE     | trimethyllysine hydroxylase; epsilon                                                                                                          | 0.3176 | 0.0266 |
| 1554214_at   |           |                                                                                                                                               | 0.1451 | 0.032  |
| 1554240_a_at | ITGAL     | integrin; alpha L (antigen CD11A (p180); lymphocyte function-associated antigen 1; alpha polypeptide)                                         | 0.9059 | 0.0112 |
| 1554258_a_at | DNAJC5B   | DnaJ (Hsp40) homolog; subfamily C; member 5 beta                                                                                              | 0.3563 | 0.018  |
| 1554279_a_at | CXorf34   | chromosome X open reading frame 34                                                                                                            | 0.4921 | 0.0021 |
| 1554285_at   | HAVCR2    | hepatitis A virus cellular receptor 2                                                                                                         | 0.2537 | 0.037  |
| 1554317_s_at | C14orf172 | chromosome 14 open reading frame 172                                                                                                          | 0.3187 | 0.006  |
| 1554331_a_at | LRRC18    | leucine rich repeat containing 18                                                                                                             | 0.1552 | 0.0134 |
| 1554335_at   | PSCD4     | pleckstrin homology; Sec7 and coiled-coil domains 4                                                                                           | 0.1955 | 0.0035 |
| 1554371_at   | PKD1L2    | polycystic kidney disease 1-like 2                                                                                                            | 0.6615 | 0.0102 |
| 1554406_a_at | CLEC7A    | C-type lectin domain family 7; member A                                                                                                       | 0.4507 | 0.0367 |
| 1554414_a_at | OSGIN2    | oxidative stress induced growth inhibitor family member 2                                                                                     | 0.8236 | 0.0447 |
| 1554447_at   | LOC554203 | hypothetical LOC554203                                                                                                                        | 0.8725 | 0.0167 |
| 1554481_a_at | EPB41     | erythrocyte membrane protein band 4.1 (elliptocytosis 1; RH-linked)                                                                           | 0.2315 | 0.0004 |
| 1554508_at   | PIK3AP1   | phosphoinositide-3-kinase adaptor protein 1                                                                                                   | 0.3183 | 0.0232 |
| 1554519_at   | CD80      | CD80 molecule                                                                                                                                 | 0.2109 | 0.0225 |
| 1554531_at   | TTC12     | tetratricopeptide repeat domain 12                                                                                                            | 0.129  | 0.0284 |
| 1554536_at   | DPYD      | dihydropyrimidine dehydrogenase                                                                                                               | 0.1701 | 0.0401 |
| 1554537_at   | TMEM126B  | transmembrane protein 126B                                                                                                                    | 0.2183 | 0.0083 |
| 1554580_a_at | WWP2      | WW domain containing E3 ubiquitin protein ligase 2                                                                                            | 0.1324 | 0.0283 |
| 1554652_s_at | MAST4     | microtubule associated serine/threonine kinase family member 4                                                                                | 0.2248 | 0.0374 |
| 1554689_a_at | NLGN4X    | neuroligin 4; X-linked                                                                                                                        | 0.2015 | 0.0387 |
| 1554702_at   | NALCN     | sodium leak channel; non-selective                                                                                                            | 0.1212 | 0.0133 |
| 1554728_at   | SLC9A1    | solute carrier family 9 (sodium/hydrogen exchanger); member 1 (antiporter; Na+/H+; amiloride sensitive)                                       | 0.128  | 0.0374 |
| 1554730_at   | MCTP1     | multiple C2 domains; transmembrane 1                                                                                                          | 0.2596 | 0.0001 |
| 1554741_s_at | FGF7      | fibroblast growth factor 7 (keratinocyte growth factor), keratinocyte growth factor-like protein 1, keratinocyte growth factor-like protein 2 | 1.0659 | 0.0238 |
| 1554841_at   | MTHFD2L   | methylenetetrahydrofolate dehydrogenase (NADP+ dependent) 2-like                                                                              | 0.6492 | 0.0002 |
| 1554899_s_at | FCER1G    | Fc fragment of IgE; high affinity I; receptor for; gamma polypeptide                                                                          | 2.1423 | 0.0058 |

|              |           |                                                                                                                |        |        |
|--------------|-----------|----------------------------------------------------------------------------------------------------------------|--------|--------|
| 1554930_a_at | FUT8      | fucosyltransferase 8 (alpha (1;6) fucosyltransferase)                                                          | 1.1586 | 0.0036 |
| 1555097_a_at | PTGFR     | prostaglandin F receptor (FP)                                                                                  | 0.6937 | 0.0369 |
| 1555118_at   | ENTPD3    | ectonucleoside triphosphate diphosphohydrolase 3                                                               | 0.1609 | 0.008  |
| 1555120_at   | CD96      | CD96 molecule                                                                                                  | 0.1681 | 0.0282 |
| 1555220_a_at | AKR1CL2   | aldo-keto reductase family 1; member C-like 2                                                                  | 0.7045 | 0.0411 |
| 1555236_a_at | PGC       | progastricsin (pepsinogen C)                                                                                   | 0.1388 | 0.0431 |
| 1555255_a_at | HISPPD2A  | histidine acid phosphatase domain containing 2A                                                                | 0.6855 | 0.0154 |
| 1555292_at   | FAM40B    | family with sequence similarity 40; member B                                                                   | 0.5431 | 0.0483 |
| 1555349_a_at | ITGB2     | integrin; beta 2 (complement component 3 receptor 3 and 4 subunit)                                             | 1.3521 | 0.0165 |
| 1555419_a_at | ASAH1     | N-acylsphingosine amidohydrolase (acid ceramidase) 1                                                           | 0.8165 | 0.0342 |
| 1555426_a_at | OTUD5     | OTU domain containing 5                                                                                        | 0.5025 | 0.0156 |
| 1555441_at   | UBE1L2    | ubiquitin-activating enzyme E1-like 2                                                                          | 0.2416 | 0.0397 |
| 1555464_at   | IFIH1     | interferon induced with helicase C domain 1                                                                    | 0.2689 | 0.0218 |
| 1555610_at   | AGK       | acylglycerol kinase                                                                                            | 0.1201 | 0.0191 |
| 1555613_a_at | ZAP70     | zeta-chain (TCR) associated protein kinase 70kDa                                                               | 0.2604 | 0.0492 |
| 1555628_a_at | HAVCR2    | hepatitis A virus cellular receptor 2                                                                          | 0.1805 | 0.0393 |
| 1555638_a_at | SAMSN1    | SAM domain; SH3 domain and nuclear localization signals 1                                                      | 0.5818 | 0.0151 |
| 1555691_a_at | KLRC4     | killer cell lectin-like receptor subfamily C; member 4, killer cell lectin-like receptor subfamily K; member 1 | 0.2645 | 0.0226 |
| 1555722_at   | SCAMPER   | sphingolipid Ca2+ release mediating protein of endoplasmic reticulum                                           | 0.1908 | 0.0067 |
| 1555728_a_at | MS4A4A    | membrane-spanning 4-domains; subfamily A; member 4                                                             | 1.5553 | 0.0347 |
| 1555734_x_at | AP1S3     | adaptor-related protein complex 1; sigma 3 subunit                                                             | 0.1826 | 0.0119 |
| 1555745_a_at | LYZ       | lysozyme (renal amyloidosis)                                                                                   | 1.585  | 0.0148 |
| 1555756_a_at | CLEC7A    | C-type lectin domain family 7; member A                                                                        | 1.252  | 0.0049 |
| 1555764_s_at | TIMM10    | translocase of inner mitochondrial membrane 10 homolog (yeast)                                                 | 0.6468 | 0.0051 |
| 1555779_a_at | CD79A     | CD79a molecule; immunoglobulin-associated alpha                                                                | 0.1808 | 0.013  |
| 1555784_s_at | IRAK1     | interleukin-1 receptor-associated kinase 1                                                                     | 0.5911 | 0.0115 |
| 1555800_at   | ZNF533    | zinc finger protein 533                                                                                        | 1.4054 | 0.003  |
| 1555801_s_at | ZNF533    | zinc finger protein 533                                                                                        | 1.9056 | 0.0029 |
| 1555852_at   |           |                                                                                                                | 2.1496 | 0.0003 |
| 1555862_s_at | MICALL2   | MICAL-like 2                                                                                                   | 0.2607 | 0.0335 |
| 1555883_s_at | SPIN3     | spindlin family; member 3                                                                                      | 0.6849 | 0.0165 |
| 1555902_at   | ARMCX5    | armadillo repeat containing; X-linked 5                                                                        | 0.5795 | 0.0073 |
| 1555910_at   | PTCD2     | pentatricopeptide repeat domain 2                                                                              | 0.8025 | 0.0079 |
| 1555961_a_at | HINT1     | histidine triad nucleotide binding protein 1                                                                   | 0.3404 | 0.019  |
| 1556026_at   | IDS       | iduronate 2-sulfatase (Hunter syndrome)                                                                        | 0.3186 | 0.0271 |
| 1556042_s_at | LOC338799 | hypothetical locus LOC338799                                                                                   | 0.5349 | 0.0016 |
| 1556129_at   | LOC642533 | hypothetical LOC642533                                                                                         | 0.4159 | 0.0144 |
| 1556134_a_at | B3GNT5    | UDP-GlcNAc:betaGal beta-1;3-N-acetylglucosaminyltransferase 5                                                  | 0.3117 | 0.018  |
| 1556167_at   | LOC339766 | hypothetical protein LOC339766                                                                                 | 0.1791 | 0.0133 |
| 1556168_s_at | LOC339766 | hypothetical protein LOC339766                                                                                 | 0.1148 | 0.0047 |
| 1556182_x_at | hCG_20426 | hCG20426                                                                                                       | 0.3226 | 0.0188 |
| 1556285_s_at | PPA2      | pyrophosphatase (inorganic) 2                                                                                  | 1.0776 | 0.0165 |
| 1556321_a_at |           | MRNA full length insert cDNA clone EUROIMAGE 283668                                                            | 0.2539 | 0.0136 |
| 1556323_at   | CUGBP2    | CUG triplet repeat; RNA binding protein 2                                                                      | 0.2358 | 0.0254 |
| 1556336_at   | RBMX      | RNA binding motif protein; X-linked                                                                            | 0.6972 | 0.042  |
| 1556385_at   |           | CDNA FLJ39926 fis; clone SPLEN2021157                                                                          | 0.2308 | 0.0223 |
| 1556397_at   |           | CDNA FLJ37122 fis; clone BRACE2022448                                                                          | 0.1394 | 0.0175 |
| 1556588_at   | C15orf37  | chromosome 15 open reading frame 37                                                                            | 0.4809 | 0.0239 |
| 1556638_at   | LOC284530 | hypothetical protein LOC284530                                                                                 | 0.1195 | 0.0481 |
| 1556667_at   | LOC348751 | hypothetical protein LOC348751                                                                                 | 0.5574 | 0.0131 |
| 1556698_a_at | GPRIN3    | GPRIN family member 3                                                                                          | 0.3234 | 0.0073 |
| 1556739_at   | FLJ35785  | hypothetical protein FLJ35785, similar to golgi autoantigen; golgin subfamily a; 8A                            | 0.1228 | 0.0153 |
| 1556766_at   | ERICH1    | Glutamate-rich 1                                                                                               | 0.1095 | 0.0461 |
| 1556771_a_at | BC038740  | BC038740                                                                                                       | 0.2245 | 0.003  |

|              |           |                                                                                     |        |        |
|--------------|-----------|-------------------------------------------------------------------------------------|--------|--------|
| 1556967_at   | ZDHC14    | zinc finger; DHHC-type containing 14                                                | 0.1268 | 0.0462 |
| 1557078_at   | SLFN5     | schlafen family member 5                                                            | 1.1294 | 0.0005 |
| 1557105_a_at |           | MRNA; cDNA DKFZp686P1116 (from clone DKFZp686P1116)                                 | 0.2219 | 0.0259 |
| 1557119_a_at | ZNF575    | zinc finger protein 575                                                             | 0.4182 | 0.002  |
| 1557195_at   |           | MRNA; cDNA DKFZp547B198 (from clone DKFZp547B198)                                   | 0.2874 | 0.0427 |
| 1557263_s_at |           | CDNA FLJ35536 fis; clone SPLEN2002451                                               | 0.3044 | 0.0344 |
| 1557383_a_at |           | CDNA FLJ38112 fis; clone D3OST2002272                                               | 0.761  | 0.0466 |
| 1557518_a_at |           | Full length insert cDNA clone YB25F11                                               | 0.1654 | 0.0013 |
| 1557567_a_at | LOC148987 | hypothetical protein LOC148987                                                      | 0.1346 | 0.0492 |
| 1557626_at   |           | CDNA FLJ39805 fis; clone SPLEN2007951                                               | 0.7282 | 0.0121 |
| 1557914_s_at |           | CDNA FLJ13785 fis; clone PLACE4000612                                               | 0.1843 | 0.0315 |
| 1558000_at   | ARID5B    | AT rich interactive domain 5B (MRF1-like)                                           | 0.1817 | 0.0207 |
| 1558105_a_at |           | Homo sapiens; Similar to LOC169932; clone IMAGE:4499203; mRNA                       | 0.8939 | 0.0242 |
| 1558177_at   | C14orf83  | chromosome 14 open reading frame 83                                                 | 0.2287 | 0.0356 |
| 1558195_at   | LOC283404 | hypothetical protein LOC283404                                                      | 0.3299 | 0.0173 |
| 1558334_a_at | C22orf15  | chromosome 22 open reading frame 15                                                 | 0.1522 | 0.0109 |
| 1558368_s_at | C1orf187  | chromosome 1 open reading frame 187                                                 | 0.1452 | 0.0332 |
| 1558484_s_at | LRR27     | leucine rich repeat containing 27                                                   | 0.134  | 0.0474 |
| 1558522_at   |           | Homo sapiens; clone IMAGE:3459334; mRNA                                             | 1.3508 | 0.0012 |
| 1558523_at   | C6orf60   | chromosome 6 open reading frame 60                                                  | 0.299  | 0.0387 |
| 1558527_at   |           | CDNA clone IMAGE:5259766                                                            | 0.639  | 0.0332 |
| 1558529_s_at |           | Homo sapiens; clone IMAGE:4778855                                                   | 0.5424 | 0.035  |
| 1558546_at   | DNASE1    | deoxyribonuclease I                                                                 | 0.1536 | 0.0108 |
| 1558662_s_at | BANK1     | B-cell scaffold protein with ankyrin repeats 1                                      | 0.9347 | 0.0383 |
| 1558770_a_at | C17orf38  | chromosome 17 open reading frame 38                                                 | 0.1924 | 0.008  |
| 1558785_a_at | RGS5      | Regulator of G-protein signalling 5                                                 | 0.1686 | 0.0139 |
| 1558847_at   |           | CDNA FLJ34734 fis; clone MESAN2006971                                               | 0.1592 | 0.037  |
| 1558857_at   |           | CDNA clone IMAGE:4818155                                                            | 0.1103 | 0.047  |
| 1558964_at   | FAT3      | FAT tumor suppressor homolog 3 (Drosophila)                                         | 0.1623 | 0.0306 |
| 1559020_a_at |           | CDNA FLJ14081 fis; clone HEMBB1002280                                               | 0.4738 | 0.0007 |
| 1559062_at   |           | Homo sapiens; clone IMAGE:5730164; mRNA                                             | 0.2572 | 0.0133 |
| 1559140_at   | FAM87A    | family with sequence similarity 87; member A                                        | 0.4761 | 0.0026 |
| 1559141_s_at | FAM87A    | family with sequence similarity 87; member A                                        | 0.674  | 0.0049 |
| 1559205_s_at |           | Homo sapiens; clone IMAGE:5745627; mRNA                                             | 0.1763 | 0.0139 |
| 1559263_s_at | PPIL4     | peptidylprolyl isomerase (cyclophilin)-like 4, zinc finger CCCH-type containing 12D | 0.519  | 0.0275 |
| 1559297_at   | LOC730092 | RRN3 RNA polymerase I transcription factor homolog (S. cerevisiae) pseudogene       | 0.1471 | 0.0091 |
| 1559333_at   |           | Homo sapiens; clone IMAGE:5206016; mRNA                                             | 0.5109 | 0.0155 |
| 1559399_s_at | ZCCHC10   | zinc finger; CCHC domain containing 10                                              | 1.0595 | 0.0271 |
| 1559402_a_at | C1orf61   | chromosome 1 open reading frame 61                                                  | 0.1402 | 0.0183 |
| 1559502_s_at | LRR25     | leucine rich repeat containing 25                                                   | 1.5698 | 0.0141 |
| 1559584_a_at | C16orf54  | chromosome 16 open reading frame 54, similar to chromosome 16 open reading frame 54 | 0.7509 | 0.0469 |
| 1559645_at   |           | Non-coding RNA HANC                                                                 | 0.242  | 0.013  |
| 1559777_at   |           | CDNA FLJ32866 fis; clone TEST12003718                                               | 0.1327 | 0.0269 |
| 1560071_a_at |           |                                                                                     | 0.4627 | 0.0304 |
| 1560435_at   |           | CDNA FLJ36444 fis; clone THYMU2012902                                               | 0.1363 | 0.0089 |
| 1560457_x_at | LSDP5     | Lipid storage droplet protein 5                                                     | 0.1267 | 0.0295 |
| 1560472_at   | LOC338588 | hypothetical protein LOC338588                                                      | 0.1298 | 0.0139 |
| 1560488_at   | FLJ45224  | FLJ45224 protein                                                                    | 0.173  | 0.0154 |
| 1560565_at   |           | Homo sapiens; clone IMAGE:5170127; mRNA                                             | 0.1513 | 0.0035 |
| 1560618_at   |           | Homo sapiens; clone IMAGE:5186867; mRNA                                             | 0.1174 | 0.0425 |
| 1560706_at   |           | MRNA; cDNA DKFZp667N1617 (from clone DKFZp667N1617)                                 | 0.1683 | 0.0356 |
| 1560727_at   | HEATR4    | HEAT repeat containing 4                                                            | 0.1395 | 0.0311 |
| 1561004_at   |           | Full length insert cDNA clone YY74A01                                               | 0.1374 | 0.0072 |
| 1561062_a_at |           | CDNA clone IMAGE:5287572                                                            | 0.1403 | 0.0353 |
| 1561400_at   |           | CDNA clone IMAGE:5297865                                                            | 0.1583 | 0.0298 |

|              |           |                                                                                                                          |        |        |
|--------------|-----------|--------------------------------------------------------------------------------------------------------------------------|--------|--------|
| 1561414_at   | LOC401497 | similar to PRO2738                                                                                                       | 0.148  | 0.0197 |
| 1561459_at   |           | CDNA clone IMAGE:4837993                                                                                                 | 0.1239 | 0.0367 |
| 1561523_at   | CCDC65    | coiled-coil domain containing 65                                                                                         | 0.1217 | 0.016  |
| 1561666_a_at | KIAA1908  | KIAA1908 protein                                                                                                         | 0.2764 | 0.0209 |
| 1561700_at   |           | CDNA clone IMAGE:4830876                                                                                                 | 0.1186 | 0.0362 |
| 1561795_at   |           | Homo sapiens; clone IMAGE:4276820; mRNA                                                                                  | 0.1034 | 0.0391 |
| 1561860_at   |           | CDNA clone IMAGE:4796386                                                                                                 | 0.1007 | 0.0155 |
| 1561871_at   |           | Homo sapiens; clone IMAGE:4300626; mRNA                                                                                  | 0.1261 | 0.0435 |
| 1562084_at   |           | CDNA clone IMAGE:5288020                                                                                                 | 0.1435 | 0.0484 |
| 1562211_a_at | ZNF491    | zinc finger protein 491                                                                                                  | 0.1516 | 0.0187 |
| 1562264_at   | LOC339685 | hypothetical protein LOC339685                                                                                           | 0.1819 | 0.0144 |
| 1562289_at   |           | MRNA; cDNA DKFZp434N0220 (from clone DKFZp434N0220)                                                                      | 0.3211 | 0.0263 |
| 1562463_at   |           | Homo sapiens; clone IMAGE:3921647; mRNA                                                                                  | 0.1352 | 0.0329 |
| 1562568_at   | LOC400541 | hypothetical gene supported by AK096066                                                                                  | 0.1515 | 0.0037 |
| 1562577_at   |           | Homo sapiens; clone IMAGE:4546564; mRNA                                                                                  | 0.2248 | 0.0019 |
| 1562736_at   | LHX9      | LIM homeobox 9                                                                                                           | 0.1377 | 0.0329 |
| 1562741_at   | UBXD2     | UBX domain containing 2                                                                                                  | 0.1715 | 0.0091 |
| 1562896_at   | KIAA1856  | KIAA1856 protein                                                                                                         | 0.227  | 0.0107 |
| 1562934_at   |           | Homo sapiens; clone IMAGE:5519753; mRNA                                                                                  | 0.1865 | 0.0078 |
| 1562966_at   | KIAA1217  | KIAA1217                                                                                                                 | 0.2136 | 0.0155 |
| 1563086_at   |           | CDNA clone IMAGE:5526877                                                                                                 | 0.1375 | 0.0373 |
| 1563111_a_at | PIGX      | phosphatidylinositol glycan anchor biosynthesis; class X                                                                 | 1.1944 | 0.0007 |
| 1563160_at   | F11       | coagulation factor XI (plasma thromboplastin antecedent)                                                                 | 0.1342 | 0.0149 |
| 1563165_at   |           | CDNA clone IMAGE:3638910                                                                                                 | 0.2002 | 0.006  |
| 1563178_at   |           | Homo sapiens; clone IMAGE:5538207; mRNA                                                                                  | 0.1152 | 0.0443 |
| 1563182_at   |           | CDNA clone IMAGE:4796641                                                                                                 | 0.2216 | 0.0454 |
| 1563253_s_at | ERBB3     | v-erb-b2 erythroblastic leukemia viral oncogene homolog 3 (avian)                                                        | 0.1034 | 0.0437 |
| 1563318_s_at | MAGIX     | MAGI family member; X-linked                                                                                             | 0.22   | 0.026  |
| 1563385_at   | D21S2091E | D21S2091E                                                                                                                | 0.1184 | 0.0438 |
| 1563445_x_at | CTSLL3    | cathepsin L-like 3                                                                                                       | 0.2779 | 0.0441 |
| 1563473_at   |           | MRNA; cDNA DKFZp761L0320 (from clone DKFZp761L0320)                                                                      | 0.2353 | 0.0319 |
| 1563528_at   | LOC91149  | hypothetical protein LOC91149                                                                                            | 0.1215 | 0.0154 |
| 1563796_s_at | EARS2     | glutamyl-tRNA synthetase 2; mitochondrial (putative)                                                                     | 0.6983 | 0.0489 |
| 1563839_at   | TBC1D7    | TBC1 domain family; member 7                                                                                             | 0.126  | 0.0069 |
| 1563840_at   |           |                                                                                                                          | 0.1405 | 0.0488 |
| 1564138_at   | FBXW12    | F-box and WD repeat domain containing 12                                                                                 | 0.1059 | 0.0479 |
| 1564202_at   |           | CDNA FLJ38820 fis; clone LIVER2008473                                                                                    | 0.102  | 0.011  |
| 1564310_a_at | PARP15    | poly (ADP-ribose) polymerase family; member 15                                                                           | 0.1476 | 0.0407 |
| 1564331_at   | LOC162993 | hypothetical protein LOC162993                                                                                           | 0.2336 | 0.0022 |
| 1564469_at   | LMOD3     | leiomodrin 3 (fetal)                                                                                                     | 0.2588 | 0.0002 |
| 1564475_s_at | LOC728723 | hypothetical protein LOC728723                                                                                           | 0.2437 | 0.0382 |
| 1564595_at   |           | Homo sapiens; clone IMAGE:5745181; mRNA                                                                                  | 0.1041 | 0.0442 |
| 1564637_a_at | FAM98B    | family with sequence similarity 98; member B                                                                             | 0.6604 | 0.0049 |
| 1564662_at   | LOC285346 | hypothetical protein LOC285346                                                                                           | 0.2064 | 0.0053 |
| 1564837_at   | LOC151760 | hypothetical LOC151760                                                                                                   | 0.3853 | 0.0382 |
| 1564886_at   |           | MRNA; cDNA DKFZp547M115 (from clone DKFZp547M115)                                                                        | 0.1828 | 0.0375 |
| 1564907_s_at | LOC727839 | matrin 3, similar to Matrin-3 (Nuclear scaffold protein P130/MAT3), small nucleolar RNA host gene (non-protein coding) 4 | 0.2513 | 0.0052 |
| 1564931_at   |           | MRNA; cDNA DKFZp667G014 (from clone DKFZp667G014)                                                                        | 0.1481 | 0.0312 |
| 1565150_at   |           | EST from clone 76558; 5' end                                                                                             | 0.3342 | 0.0156 |
| 1565579_at   |           | CDNA clone IMAGE:3689276                                                                                                 | 0.2217 | 0.023  |
| 1565627_a_at |           | Full length insert cDNA clone ZD55G10                                                                                    | 0.1843 | 0.0309 |
| 1565656_x_at |           | CDNA FLJ36440 fis; clone THYMU2012565                                                                                    | 0.1281 | 0.0306 |
| 1565752_at   | FGD2      | FYVE; RhoGEF and PH domain containing 2                                                                                  | 0.3881 | 0.0149 |
| 1565754_x_at | FGD2      | FYVE; RhoGEF and PH domain containing 2                                                                                  | 0.4458 | 0.0222 |

|              |           |                                                                           |        |        |
|--------------|-----------|---------------------------------------------------------------------------|--------|--------|
| 1565759_at   | RPL13     | Ribosomal protein L13                                                     | 0.1968 | 0.0258 |
| 1565868_at   | CD44      | CD44 molecule (Indian blood group)                                        | 0.1713 | 0.0207 |
| 1566101_at   | TTL5      | Tubulin tyrosine ligase-like family; member 5                             | 0.1446 | 0.0161 |
| 1566302_at   | PPP1R11   | protein phosphatase 1; regulatory (inhibitor) subunit 11                  | 0.1572 | 0.0229 |
| 1566437_at   | LOC283475 | Hypothetical protein LOC283475                                            | 0.1003 | 0.0278 |
| 1566504_at   |           | CDNA clone IMAGE:5265199                                                  | 0.1308 | 0.0487 |
| 1566555_at   | FLJ90757  | hypothetical protein LOC440465                                            | 0.1083 | 0.0363 |
| 1566680_at   |           | CDNA FLJ37017 fis; clone BRACE2010642                                     | 0.1025 | 0.0286 |
| 1566700_at   | VRK3      | vaccinia related kinase 3                                                 | 0.1376 | 0.0005 |
| 1566772_at   |           | MRNA; cDNA DKFZp547L1918 (from clone DKFZp547L1918)                       | 0.316  | 0.0229 |
| 1566844_at   | PER4      | period 4 pseudogene                                                       | 0.1147 | 0.0421 |
| 1566984_at   | LOC651250 | hypothetical protein LOC651250, hypothetical protein LOC729074            | 0.1596 | 0.0407 |
| 1567080_s_at | CLN6      | ceroid-lipofuscinosis; neuronal 6; late infantile; variant                | 0.8995 | 0.009  |
| 1567379_at   |           | Partial mRNA; ID band56                                                   | 0.1479 | 0.0098 |
| 1567623_at   | ABLIM2    | Actin binding LIM protein family; member 2                                | 0.1795 | 0.0271 |
| 1567628_at   | CD74      | CD74 molecule; major histocompatibility complex; class II invariant chain | 1.9159 | 0.01   |
| 1568191_at   |           |                                                                           | 0.1966 | 0.0127 |
| 1568592_at   | TRIM69    | tripartite motif-containing 69                                            | 1.501  | 0.001  |
| 1568593_a_at | NUDT16P   | nudix (nucleoside diphosphate linked moiety X)-type motif 16 pseudogene   | 0.4563 | 0.0213 |
| 1568646_x_at | ZNF208    | zinc finger protein 208                                                   | 0.1435 | 0.0434 |
| 1568743_at   | ATP10A    | ATPase; Class V; type 10A                                                 | 0.1687 | 0.0108 |
| 1568830_at   | IRAK3     | Interleukin-1 receptor-associated kinase 3                                | 0.1291 | 0.0352 |
| 1568931_at   |           | CDNA clone IMAGE:4799464                                                  | 0.3099 | 0.0146 |
| 1569039_s_at | ZNF677    | zinc finger protein 677                                                   | 0.6632 | 0.0401 |
| 1569289_at   | BIVM      | Basic; immunoglobulin-like variable motif containing                      | 0.1418 | 0.0134 |
| 1569393_at   | MGC15885  | hypothetical protein MGC15885                                             | 0.1586 | 0.0031 |
| 1569403_at   |           | CDNA clone IMAGE:4706427                                                  | 1.532  | 0.0052 |
| 1569640_s_at | KIAA1706  | KIAA1706 protein                                                          | 0.1581 | 0.0408 |
| 1569660_at   |           | Pp13439                                                                   | 0.2122 | 0.0001 |
| 1569689_s_at | LOC730017 | similar to gamma-aminobutyric acid (GABA) A receptor; beta 3              | 0.1414 | 0.0254 |
| 1569765_at   |           | CDNA clone IMAGE:4812570                                                  | 0.219  | 0.0019 |
| 1569792_a_at | MGC50559  | hypothetical protein MGC50559                                             | 0.4705 | 0.0137 |
| 1569846_at   |           | CDNA clone IMAGE:4838270                                                  | 0.1732 | 0.0465 |
| 1569867_at   | EME2      | essential meiotic endonuclease 1 homolog 2 (S. pombe)                     | 0.653  | 0.0078 |
| 1569868_s_at | EME2      | essential meiotic endonuclease 1 homolog 2 (S. pombe)                     | 0.7538 | 0.0355 |
| 1569898_a_at |           | CDNA clone IMAGE:5259766                                                  | 1.0739 | 0.0003 |
| 1569986_x_at | TNNT3     | troponin T type 3 (skeletal; fast)                                        | 0.4565 | 0.022  |
| 1569995_at   | LOC152586 | similar to RIKEN cDNA 4933434I20                                          | 0.194  | 0.0047 |
| 1570100_at   |           | Homo sapiens; clone IMAGE:4780054; mRNA                                   | 0.1032 | 0.0223 |
| 1570125_at   |           | Homo sapiens; clone IMAGE:5229457; mRNA                                   | 0.3122 | 0.0037 |
| 1570234_at   |           | Homo sapiens; clone IMAGE:5169759; mRNA                                   | 0.1323 | 0.0192 |
| 1570239_a_at | MIST      | mast cell immunoreceptor signal transducer                                | 0.1907 | 0.0393 |
| 1570301_at   |           | CDNA clone IMAGE:4696931                                                  | 0.2298 | 0.0319 |
| 1570330_at   |           | Homo sapiens; clone IMAGE:4151631; mRNA                                   | 0.1529 | 0.0284 |
| 1570375_at   |           | Homo sapiens; clone IMAGE:4475530; mRNA                                   | 0.1534 | 0.028  |
| 1570410_at   | CYGB      | cytoglobin                                                                | 0.1146 | 0.0303 |
| 1570490_at   |           | CDNA clone IMAGE:4248504                                                  | 0.1101 | 0.0233 |
| 1570523_s_at | ATG10     | ATG10 autophagy related 10 homolog (S. cerevisiae)                        | 1.0363 | 0.0057 |
| 1598_g_at    | GAS6      | growth arrest-specific 6                                                  | 0.9307 | 0.0478 |
| 200046_at    | DAD1      | defender against cell death 1                                             | 0.4546 | 0.0265 |
| 200093_s_at  | HINT1     | histidine triad nucleotide binding protein 1                              | 0.4586 | 0.0165 |
| 200600_at    | MSN       | moesin                                                                    | 0.9341 | 0.0469 |
| 200609_s_at  | WDR1      | WD repeat domain 1                                                        | 0.5496 | 0.0207 |
| 200628_s_at  | WARS      | tryptophanyl-tRNA synthetase                                              | 1.2684 | 0.0063 |
| 200629_at    | WARS      | tryptophanyl-tRNA synthetase                                              | 1.3775 | 0.0066 |
| 200655_s_at  | CALM1     | calmodulin 1 (phosphorylase kinase; delta)                                | 0.4555 | 0.0115 |

|             |          |                                                                                                                        |        |        |
|-------------|----------|------------------------------------------------------------------------------------------------------------------------|--------|--------|
| 200657_at   | SLC25A5  | solute carrier family 25 (mitochondrial carrier; adenine nucleotide translocator); member 5                            | 0.7344 | 0.0074 |
| 200659_s_at | PHB      | prohibitin                                                                                                             | 0.5773 | 0.0121 |
| 200668_s_at | UBE2D2   | ubiquitin-conjugating enzyme E2D 2 (UBC4/5 homolog; yeast), ubiquitin-conjugating enzyme E2D 3 (UBC4/5 homolog; yeast) | 0.2858 | 0.0448 |
| 200678_x_at | GRN      | granulin                                                                                                               | 0.743  | 0.0169 |
| 200690_at   | HSPA9    | heat shock 70kDa protein 9 (mortalin)                                                                                  | 0.9543 | 0.0434 |
| 200691_s_at | HSPA9    | heat shock 70kDa protein 9 (mortalin)                                                                                  | 0.4647 | 0.0205 |
| 200692_s_at | HSPA9    | heat shock 70kDa protein 9 (mortalin)                                                                                  | 0.5755 | 0.035  |
| 200704_at   | LITAF    | lipopolysaccharide-induced TNF factor                                                                                  | 0.5961 | 0.0125 |
| 200724_at   | RPL10    | ribosomal protein L10                                                                                                  | 0.2323 | 0.0023 |
| 200725_x_at | RPL10    | ribosomal protein L10                                                                                                  | 0.2114 | 0.0355 |
| 200742_s_at | TPP1     | tripeptidyl peptidase I                                                                                                | 1.0111 | 0.0093 |
| 200743_s_at | TPP1     | tripeptidyl peptidase I                                                                                                | 0.6727 | 0.009  |
| 200790_at   | ODC1     | ornithine decarboxylase 1                                                                                              | 0.9756 | 0.0498 |
| 200801_x_at | ACTB     | actin; beta                                                                                                            | 0.1045 | 0.0241 |
| 200808_s_at | ZYX      | zyxin                                                                                                                  | 1.6631 | 0.0012 |
| 200824_at   | GSTP1    | glutathione S-transferase pi                                                                                           | 1.8919 | 0.0124 |
| 200830_at   | PSMD2    | proteasome (prosome; macropain) 26S subunit; non-ATPase; 2                                                             | 0.2597 | 0.0362 |
| 200852_x_at | GNB2     | guanine nucleotide binding protein (G protein); beta polypeptide 2                                                     | 0.4077 | 0.0269 |
| 200883_at   | UQCRC2   | ubiquinol-cytochrome c reductase core protein II                                                                       | 0.6989 | 0.0169 |
| 200893_at   | SFRS10   | splicing factor; arginine/serine-rich 10 (transformer 2 homolog; Drosophila)                                           | 0.1453 | 0.0247 |
| 200904_at   | HLA-E    | major histocompatibility complex; class I; E                                                                           | 1.1664 | 0.0105 |
| 200905_x_at | HLA-E    | major histocompatibility complex; class I; E                                                                           | 0.869  | 0.0057 |
| 200915_x_at | KTN1     | kinectin 1 (kinesin receptor)                                                                                          | 0.2579 | 0.0363 |
| 200933_x_at | RPS4X    | ribosomal protein S4; X-linked                                                                                         | 0.1524 | 0.041  |
| 200954_at   | ATP6V0C  | ATPase; H+ transporting; lysosomal 16kDa; V0 subunit c                                                                 | 0.5907 | 0.0253 |
| 200961_at   | SEPHS2   | selenophosphate synthetase 2                                                                                           | 0.739  | 0.0177 |
| 201023_at   | TAF7     | TAF7 RNA polymerase II; TATA box binding protein (TBP)-associated factor; 55kDa                                        | 0.4358 | 0.0426 |
| 201035_s_at | HADH     | hydroxyacyl-Coenzyme A dehydrogenase                                                                                   | 0.7072 | 0.0352 |
| 201038_s_at | ANP32A   | Acidic (leucine-rich) nuclear phosphoprotein 32 family; member A                                                       | 0.5071 | 0.0441 |
| 201068_s_at | PSMC2    | proteasome (prosome; macropain) 26S subunit; ATPase; 2                                                                 | 0.2491 | 0.0474 |
| 201079_at   | SYNGR2   | synaptogyrin 2                                                                                                         | 0.9481 | 0.0278 |
| 201089_at   | ATP6V1B2 | ATPase; H+ transporting; lysosomal 56/58kDa; V1 subunit B2                                                             | 0.9626 | 0.0014 |
| 201132_at   | HNRPH2   | heterogeneous nuclear ribonucleoprotein H2 (H')                                                                        | 0.6657 | 0.0055 |
| 201134_x_at | COX7C    | cytochrome c oxidase subunit VIIc                                                                                      | 0.3111 | 0.0278 |
| 201136_at   | PLP2     | proteolipid protein 2 (colonic epithelium-enriched)                                                                    | 0.6758 | 0.0184 |
| 201137_s_at | HLA-DPB1 | major histocompatibility complex; class II; DP beta 1                                                                  | 1.7782 | 0.0153 |
| 201140_s_at | RAB5C    | RAB5C; member RAS oncogene family                                                                                      | 0.4595 | 0.0476 |
| 201156_s_at | RAB5C    | RAB5C; member RAS oncogene family                                                                                      | 0.8915 | 0.0132 |
| 201197_at   | AMD1     | adenosylmethionine decarboxylase 1                                                                                     | 0.4218 | 0.0021 |
| 201200_at   | CREG1    | cellular repressor of E1A-stimulated genes 1                                                                           | 0.7398 | 0.0128 |
| 201212_at   | LGMN     | legumain                                                                                                               | 0.8585 | 0.0448 |
| 201237_at   | CAPZA2   | capping protein (actin filament) muscle Z-line; alpha 2                                                                | 0.633  | 0.0113 |
| 201238_s_at | CAPZA2   | capping protein (actin filament) muscle Z-line; alpha 2                                                                | 0.5556 | 0.0087 |
| 201264_at   | COPE     | coatomer protein complex; subunit epsilon                                                                              | 0.413  | 0.0426 |
| 201266_at   | TXNRD1   | thioredoxin reductase 1                                                                                                | 0.586  | 0.0296 |
| 201274_at   | PSMA5    | proteasome (prosome; macropain) subunit; alpha type; 5                                                                 | 0.6803 | 0.0422 |
| 201282_at   | OGDH     | oxoglutarate (alpha-ketoglutarate) dehydrogenase (lipoamide)                                                           | 0.8725 | 0.0064 |
| 201311_s_at | SH3BGRL  | SH3 domain binding glutamic acid-rich protein like                                                                     | 1.0176 | 0.0027 |
| 201312_s_at | SH3BGRL  | SH3 domain binding glutamic acid-rich protein like                                                                     | 0.6209 | 0.0025 |
| 201317_s_at | PSMA2    | proteasome (prosome; macropain) subunit; alpha type; 2                                                                 | 0.3871 | 0.0492 |

|             |           |                                                                                               |        |        |
|-------------|-----------|-----------------------------------------------------------------------------------------------|--------|--------|
| 201349_at   | SLC9A3R1  | solute carrier family 9 (sodium/hydrogen exchanger); member 3 regulator 1                     | 1.8496 | 0.018  |
| 201361_at   | TMEM109   | transmembrane protein 109                                                                     | 0.6135 | 0.016  |
| 201364_s_at | OAZ2      | ornithine decarboxylase antizyme 2                                                            | 0.9501 | 0.0152 |
| 201365_at   | OAZ2      | ornithine decarboxylase antizyme 2                                                            | 0.5847 | 0.0078 |
| 201381_x_at | CACYBP    | calcyclin binding protein                                                                     | 0.4023 | 0.0417 |
| 201391_at   | TRAP1     | TNF receptor-associated protein 1                                                             | 0.6264 | 0.0374 |
| 201412_at   | LRP10     | low density lipoprotein receptor-related protein 10                                           | 0.3965 | 0.0199 |
| 201422_at   | IFI30     | interferon; gamma-inducible protein 30                                                        | 1.4598 | 0.0317 |
| 201430_s_at | DPYSL3    | dihydropyrimidinase-like 3                                                                    | 0.7054 | 0.0096 |
| 201431_s_at | DPYSL3    | dihydropyrimidinase-like 3                                                                    | 1.5575 | 0.0147 |
| 201434_at   | TTC1      | tetratricopeptide repeat domain 1                                                             | 1.0279 | 0.0208 |
| 201435_s_at | EIF4E     | eukaryotic translation initiation factor 4E                                                   | 0.8421 | 0.0122 |
| 201440_at   | DDX23     | DEAD (Asp-Glu-Ala-Asp) box polypeptide 23                                                     | 0.493  | 0.0233 |
| 201453_x_at | RHEB      | Ras homolog enriched in brain                                                                 | 0.2525 | 0.0464 |
| 201472_at   | VBP1      | von Hippel-Lindau binding protein 1                                                           | 0.6493 | 0.0063 |
| 201479_at   | DKC1      | dyskeratosis congenita 1; dyskerin                                                            | 0.5431 | 0.031  |
| 201491_at   | AHSA1     | AHA1; activator of heat shock 90kDa protein ATPase homolog 1 (yeast)                          | 0.4998 | 0.0468 |
| 201526_at   | ARF5      | ADP-ribosylation factor 5                                                                     | 0.5045 | 0.0056 |
| 201527_at   | ATP6V1F   | ATPase; H+ transporting; lysosomal 14kDa; V1 subunit F                                        | 0.4152 | 0.0266 |
| 201532_at   | PSMA3     | proteasome (prosome; macropain) subunit; alpha type; 3                                        | 0.6707 | 0.0146 |
| 201562_s_at | LOC653381 | similar to Sorbitol dehydrogenase (L-iditol 2-dehydrogenase), sorbitol dehydrogenase          | 1.0022 | 0.0178 |
| 201573_s_at | ETF1      | eukaryotic translation termination factor 1                                                   | 0.6895 | 0.0184 |
| 201575_at   | SNW1      | SNW domain containing 1                                                                       | 0.304  | 0.0201 |
| 201581_at   | TXNDC13   | thioredoxin domain containing 13                                                              | 0.752  | 0.0158 |
| 201605_x_at | CNN2      | calponin 2                                                                                    | 0.5295 | 0.0263 |
| 201607_at   | PWP1      | PWP1 homolog (S. cerevisiae)                                                                  | 0.6403 | 0.0276 |
| 201646_at   | SCARB2    | scavenger receptor class B; member 2                                                          | 0.8371 | 0.033  |
| 201695_s_at | NP        | nucleoside phosphorylase                                                                      | 1.8609 | 0.001  |
| 201705_at   | PSMD7     | proteasome (prosome; macropain) 26S subunit; non-ATPase; 7                                    | 0.3297 | 0.0452 |
| 201743_at   | CD14      | CD14 molecule                                                                                 | 1.6027 | 0.0451 |
| 201756_at   | RPA2      | replication protein A2; 32kDa                                                                 | 0.7197 | 0.0287 |
| 201765_s_at | HEXA      | hexosaminidase A (alpha polypeptide)                                                          | 0.7301 | 0.0162 |
| 201769_at   | CLINT1    | clathrin interactor 1                                                                         | 0.5738 | 0.0084 |
| 201801_s_at | SLC29A1   | solute carrier family 29 (nucleoside transporters); member 1                                  | 2.0087 | 0.0092 |
| 201802_at   | SLC29A1   | solute carrier family 29 (nucleoside transporters); member 1                                  | 1.1594 | 0.0084 |
| 201812_s_at | LOC201725 | hypothetical protein LOC201725, translocase of outer mitochondrial membrane 7 homolog (yeast) | 0.3369 | 0.0419 |
| 201831_s_at | VDP       | vesicle docking protein p115                                                                  | 0.8717 | 0.011  |
| 201832_s_at | VDP       | vesicle docking protein p115                                                                  | 0.496  | 0.0039 |
| 201840_at   | NEDD8     | neural precursor cell expressed; developmentally down-regulated 8                             | 0.3655 | 0.0169 |
| 201857_at   | ZFR       | zinc finger RNA binding protein                                                               | 0.2192 | 0.0453 |
| 201880_at   | ARIH1     | Ariadne homolog; ubiquitin-conjugating enzyme E2 binding protein; 1 (Drosophila)              | 0.4796 | 0.0467 |
| 201891_s_at | B2M       | beta-2-microglobulin                                                                          | 0.2972 | 0.0054 |
| 201895_at   | ARAF      | v-raf murine sarcoma 3611 viral oncogene homolog                                              | 0.6255 | 0.0168 |
| 201898_s_at | UBE2A     | ubiquitin-conjugating enzyme E2A (RAD6 homolog)                                               | 0.6582 | 0.0094 |
| 201899_s_at | UBE2A     | ubiquitin-conjugating enzyme E2A (RAD6 homolog)                                               | 0.7077 | 0.0008 |
| 201903_at   | UQCRC1    | ubiquinol-cytochrome c reductase core protein I                                               | 0.399  | 0.0317 |
| 201905_s_at | CTDSPL    | CTD (carboxy-terminal domain; RNA polymerase II; polypeptide A) small phosphatase-like        | 0.3518 | 0.0284 |
| 201931_at   | ETFA      | electron-transfer-flavoprotein; alpha polypeptide (glutaric aciduria II)                      | 0.5184 | 0.0143 |
| 201972_at   | ATP6V1A   | ATPase; H+ transporting; lysosomal 70kDa; V1 subunit A                                        | 0.3965 | 0.0193 |

|             |          |                                                                                                                                                                                    |        |        |
|-------------|----------|------------------------------------------------------------------------------------------------------------------------------------------------------------------------------------|--------|--------|
| 201974_s_at | C7orf28A | chromosome 7 open reading frame 28A, chromosome 7 open reading frame 28B, similar to CG14980-PB                                                                                    | 0.1157 | 0.0416 |
| 202009_at   | TWF2     | twinfilin; actin-binding protein; homolog 2 (Drosophila)                                                                                                                           | 0.7684 | 0.001  |
| 202032_s_at | MAN2A2   | mannosidase; alpha; class 2A; member 2                                                                                                                                             | 0.689  | 0.0325 |
| 202063_s_at | SEL1L    | sel-1 suppressor of lin-12-like (C. elegans)                                                                                                                                       | 0.3124 | 0.0037 |
| 202069_s_at | IDH3A    | isocitrate dehydrogenase 3 (NAD+) alpha                                                                                                                                            | 1.2765 | 0.021  |
| 202070_s_at | IDH3A    | isocitrate dehydrogenase 3 (NAD+) alpha                                                                                                                                            | 1.1269 | 0.0444 |
| 202071_at   | SDC4     | syndecan 4                                                                                                                                                                         | 1.3543 | 0.0309 |
| 202077_at   | NDUFAB1  | NADH dehydrogenase (ubiquinone) 1; alpha/beta subcomplex; 1; 8kDa                                                                                                                  | 0.4802 | 0.0025 |
| 202078_at   | COPS3    | COP9 constitutive photomorphogenic homolog subunit 3 (Arabidopsis)                                                                                                                 | 0.4641 | 0.036  |
| 202085_at   | TJP2     | tight junction protein 2 (zona occludens 2)                                                                                                                                        | 1.1331 | 0.031  |
| 202087_s_at | CTSL1    | cathepsin L1                                                                                                                                                                       | 0.4098 | 0.0155 |
| 202090_s_at | TMEM54   | transmembrane protein 54, ubiquinol-cytochrome c reductase; 6.4kDa subunit                                                                                                         | 0.3476 | 0.0199 |
| 202105_at   | IGBP1    | immunoglobulin (CD79A) binding protein 1                                                                                                                                           | 0.561  | 0.0431 |
| 202110_at   | COX7B    | cytochrome c oxidase subunit VIIb                                                                                                                                                  | 0.6052 | 0.0039 |
| 202113_s_at | SNX2     | sorting nexin 2                                                                                                                                                                    | 0.8103 | 0.0416 |
| 202114_at   | SNX2     | sorting nexin 2                                                                                                                                                                    | 0.4886 | 0.015  |
| 202177_at   | GAS6     | growth arrest-specific 6                                                                                                                                                           | 0.7733 | 0.0104 |
| 202201_at   | BLVRB    | biliverdin reductase B (flavin reductase (NADPH))                                                                                                                                  | 1.2976 | 0.01   |
| 202209_at   | LSM3     | LSM3 homolog; U6 small nuclear RNA associated (S. cerevisiae)                                                                                                                      | 0.5586 | 0.034  |
| 202266_at   | TTRAP    | TRAF and TNF receptor associated protein                                                                                                                                           | 0.3912 | 0.034  |
| 202267_at   | LAMC2    | laminin; gamma 2                                                                                                                                                                   | 0.2    | 0.0395 |
| 202276_at   | SHFM1    | split hand/foot malformation (ectrodactyly) type 1                                                                                                                                 | 0.3118 | 0.018  |
| 202279_at   | C14orf2  | chromosome 14 open reading frame 2                                                                                                                                                 | 0.6809 | 0.0375 |
| 202298_at   | NDUFA1   | NADH dehydrogenase (ubiquinone) 1 alpha subcomplex; 1; 7.5kDa                                                                                                                      | 0.5958 | 0.0016 |
| 202307_s_at | TAP1     | transporter 1; ATP-binding cassette; sub-family B (MDR/TAP)                                                                                                                        | 1.4557 | 0.0112 |
| 202329_at   | CSK      | c-src tyrosine kinase                                                                                                                                                              | 0.7759 | 0.001  |
| 202345_s_at | FABP5    | fatty acid binding protein 5 (psoriasis-associated), similar to Fatty acid-binding protein; epidermal (E-FABP) (Psoriasis-associated fatty acid-binding protein homolog) (PA-FABP) | 1.9987 | 0.002  |
| 202357_s_at | CFB      | complement factor B                                                                                                                                                                | 1.0102 | 0.0411 |
| 202382_s_at | GNPDA1   | glucosamine-6-phosphate deaminase 1                                                                                                                                                | 0.9234 | 0.0094 |
| 202387_at   | BAG1     | BCL2-associated athanogene                                                                                                                                                         | 0.7276 | 0.0236 |
| 202395_at   | NSF      | N-ethylmaleimide-sensitive factor                                                                                                                                                  | 0.4661 | 0.0443 |
| 202430_s_at | PLSCR1   | phospholipid scramblase 1                                                                                                                                                          | 0.9022 | 0.0313 |
| 202471_s_at | IDH3G    | isocitrate dehydrogenase 3 (NAD+) gamma                                                                                                                                            | 0.571  | 0.0275 |
| 202504_at   | TRIM29   | tripartite motif-containing 29                                                                                                                                                     | 0.1863 | 0.0351 |
| 202511_s_at | ATG5     | ATG5 autophagy related 5 homolog (S. cerevisiae)                                                                                                                                   | 0.5821 | 0.0343 |
| 202517_at   | CRMP1    | collapsin response mediator protein 1                                                                                                                                              | 1.7957 | 0.0104 |
| 202518_at   | BCL7B    | B-cell CLL/lymphoma 7B                                                                                                                                                             | 1.0076 | 0.0013 |
| 202531_at   | IRF1     | interferon regulatory factor 1                                                                                                                                                     | 1.2884 | 0.0093 |
| 202535_at   | FADD     | Fas (TNFRSF6)-associated via death domain                                                                                                                                          | 0.6063 | 0.0243 |
| 202536_at   | CHMP2B   | chromatin modifying protein 2B                                                                                                                                                     | 0.8543 | 0.0147 |
| 202541_at   | SCYE1    | small inducible cytokine subfamily E; member 1 (endothelial monocyte-activating)                                                                                                   | 0.6463 | 0.0012 |
| 202591_s_at | SSBP1    | single-stranded DNA binding protein 1                                                                                                                                              | 0.4601 | 0.0147 |
| 202592_at   | BLOC1S1  | biogenesis of lysosome-related organelles complex-1; subunit 1                                                                                                                     | 0.6741 | 0.0229 |
| 202601_s_at | HTATSF1  | HIV-1 Tat specific factor 1                                                                                                                                                        | 0.7624 | 0.0167 |
| 202602_s_at | HTATSF1  | HIV-1 Tat specific factor 1                                                                                                                                                        | 0.4958 | 0.0268 |
| 202625_at   | LYN      | v-yes-1 Yamaguchi sarcoma viral related oncogene homolog                                                                                                                           | 1.5517 | 0.0055 |
| 202626_s_at | LYN      | v-yes-1 Yamaguchi sarcoma viral related oncogene homolog                                                                                                                           | 1.8978 | 0.0035 |
| 202667_s_at | SLC39A7  | solute carrier family 39 (zinc transporter); member 7                                                                                                                              | 0.3811 | 0.0463 |



|             |           |                                                                                                        |        |        |
|-------------|-----------|--------------------------------------------------------------------------------------------------------|--------|--------|
| 202677_at   | RASA1     | RAS p21 protein activator (GTPase activating protein) 1                                                | 0.6755 | 0.0185 |
| 202687_s_at | TNFSF10   | tumor necrosis factor (ligand) superfamily; member 10                                                  | 0.967  | 0.0097 |
| 202688_at   | TNFSF10   | tumor necrosis factor (ligand) superfamily; member 10                                                  | 0.9517 | 0.0219 |
| 202693_s_at | STK17A    | serine/threonine kinase 17a                                                                            | 1.0949 | 0.0268 |
| 202694_at   | STK17A    | serine/threonine kinase 17a                                                                            | 0.9085 | 0.0186 |
| 202695_s_at | STK17A    | serine/threonine kinase 17a                                                                            | 1.6233 | 0.0201 |
| 202702_at   | TRIM26    | tripartite motif-containing 26                                                                         | 0.5733 | 0.0084 |
| 202713_s_at | KIAA0391  | KIAA0391                                                                                               | 0.7825 | 0.0043 |
| 202716_at   | PTPN1     | protein tyrosine phosphatase; non-receptor type 1                                                      | 0.6647 | 0.0223 |
| 202720_at   | TES       | testis derived transcript (3 LIM domains)                                                              | 1.5386 | 0.0479 |
| 202750_s_at | TFIP11    | tuftelin interacting protein 11                                                                        | 0.5437 | 0.0341 |
| 202751_at   | TFIP11    | tuftelin interacting protein 11                                                                        | 0.3027 | 0.0094 |
| 202753_at   | PSMD6     | proteasome (prosome; macropain) 26S subunit; non-ATPase; 6                                             | 0.5274 | 0.0136 |
| 202758_s_at | RFXANK    | regulatory factor X-associated ankyrin-containing protein                                              | 0.5614 | 0.0264 |
| 202787_s_at | MAPKAPK3  | mitogen-activated protein kinase-activated protein kinase 3                                            | 1.1338 | 0.0378 |
| 202788_at   | MAPKAPK3  | mitogen-activated protein kinase-activated protein kinase 3                                            | 1.3903 | 0.0133 |
| 202803_s_at | ITGB2     | integrin; beta 2 (complement component 3 receptor 3 and 4 subunit)                                     | 1.5226 | 0.0382 |
| 202829_s_at | SYBL1     | synaptobrevin-like 1                                                                                   | 0.7146 | 0.0083 |
| 202833_s_at | SERPINA1  | serpin peptidase inhibitor; clade A (alpha-1 antiproteinase; antitrypsin); member 1                    | 1.8061 | 0.0023 |
| 202838_at   | FUCA1     | fucosidase; alpha-L- 1; tissue                                                                         | 0.94   | 0.0334 |
| 202848_s_at | GRK6      | G protein-coupled receptor kinase 6                                                                    | 0.38   | 0.0393 |
| 202852_s_at | FLJ11506  | hypothetical protein FLJ11506                                                                          | 0.5632 | 0.027  |
| 202872_at   | ATP6V1C1  | ATPase; H+ transporting; lysosomal 42kDa; V1 subunit C1                                                | 0.5333 | 0.0287 |
| 202874_s_at | ATP6V1C1  | ATPase; H+ transporting; lysosomal 42kDa; V1 subunit C1                                                | 0.5545 | 0.0237 |
| 202886_s_at | PPP2R1B   | protein phosphatase 2 (formerly 2A); regulatory subunit A; beta isoform                                | 1.1165 | 0.0429 |
| 202895_s_at | SIRPA     | signal-regulatory protein alpha                                                                        | 0.4071 | 0.0236 |
| 202896_s_at | SIRPA     | signal-regulatory protein alpha                                                                        | 1.0136 | 0.0285 |
| 202897_at   | SIRPA     | signal-regulatory protein alpha                                                                        | 1.0279 | 0.0346 |
| 202904_s_at | LSM5      | LSM5 homolog; U6 small nuclear RNA associated (S. cerevisiae)                                          | 0.9379 | 0.0364 |
| 202905_x_at | NBN       | nibrin                                                                                                 | 0.8661 | 0.0143 |
| 202906_s_at | NBN       | nibrin                                                                                                 | 0.3919 | 0.028  |
| 202907_s_at | NBN       | nibrin                                                                                                 | 0.7515 | 0.0045 |
| 202921_s_at | ANK2      | ankyrin 2; neuronal                                                                                    | 0.4749 | 0.0384 |
| 202953_at   | C1QB      | complement component 1; q subcomponent; B chain                                                        | 1.9306 | 0.0108 |
| 202957_at   | HCLS1     | hematopoietic cell-specific Lyn substrate 1                                                            | 1.5502 | 0.0297 |
| 202958_at   | PTPN9     | protein tyrosine phosphatase; non-receptor type 9                                                      | 0.5001 | 0.0475 |
| 202974_at   | MPP1      | membrane protein; palmitoylated 1; 55kDa                                                               | 1.2444 | 0.0021 |
| 202982_s_at | ACOT1     | acyl-CoA thioesterase 1, acyl-CoA thioesterase 2                                                       | 1.8477 | 0      |
| 202985_s_at | BAG5      | BCL2-associated athanogene 5                                                                           | 0.5254 | 0.0367 |
| 202996_at   | POLD4     | polymerase (DNA-directed); delta 4                                                                     | 0.4251 | 0.0475 |
| 203016_s_at | SSX2IP    | synovial sarcoma; X breakpoint 2 interacting protein                                                   | 1.3035 | 0.028  |
| 203017_s_at | SSX2IP    | synovial sarcoma; X breakpoint 2 interacting protein                                                   | 1.0541 | 0.0439 |
| 203018_s_at | SSX2IP    | synovial sarcoma; X breakpoint 2 interacting protein                                                   | 0.6667 | 0.031  |
| 203019_x_at | SSX2IP    | synovial sarcoma; X breakpoint 2 interacting protein                                                   | 0.4853 | 0.0292 |
| 203041_s_at | LAMP2     | lysosomal-associated membrane protein 2                                                                | 1.0108 | 0.0227 |
| 203042_at   | LAMP2     | lysosomal-associated membrane protein 2                                                                | 0.7472 | 0.0222 |
| 203047_at   | STK10     | serine/threonine kinase 10                                                                             | 0.8892 | 0.0038 |
| 203051_at   | BAHD1     | bromo adjacent homology domain containing 1                                                            | 0.922  | 0.001  |
| 203072_at   | LOC390588 | myosin IE, similar to CDK105 protein                                                                   | 0.517  | 0.0409 |
| 203097_s_at | RAPGEF2   | Rap guanine nucleotide exchange factor (GEF) 2                                                         | 0.615  | 0.0105 |
| 203104_at   | CSF1R     | colony stimulating factor 1 receptor; formerly McDonough feline sarcoma viral (v-fms) oncogene homolog | 2.0244 | 0.0024 |

|             |          |                                                                                                            |        |        |
|-------------|----------|------------------------------------------------------------------------------------------------------------|--------|--------|
| 203108_at   | GPRC5A   | G protein-coupled receptor; family C; group 5; member A                                                    | 1.4019 | 0.0416 |
| 203123_s_at | SLC11A2  | solute carrier family 11 (proton-coupled divalent metal ion transporters); member 2                        | 1.2644 | 0.0147 |
| 203124_s_at | SLC11A2  | solute carrier family 11 (proton-coupled divalent metal ion transporters); member 2                        | 0.9391 | 0.013  |
| 203125_x_at | SLC11A2  | solute carrier family 11 (proton-coupled divalent metal ion transporters); member 2                        | 0.8493 | 0.0133 |
| 203142_s_at | AP3B1    | adaptor-related protein complex 3; beta 1 subunit                                                          | 0.7876 | 0.0253 |
| 203143_s_at | KIAA0040 | KIAA0040                                                                                                   | 0.7628 | 0.0021 |
| 203144_s_at | KIAA0040 | KIAA0040                                                                                                   | 0.3081 | 0.0172 |
| 203151_at   | MAP1A    | microtubule-associated protein 1A                                                                          | 1.2138 | 0.0311 |
| 203200_s_at | MTRR     | 5-methyltetrahydrofolate-homocysteine methyltransferase reductase                                          | 0.8155 | 0.0061 |
| 203207_s_at | MTFR1    | mitochondrial fission regulator 1                                                                          | 0.8099 | 0.0461 |
| 203218_at   | MAPK9    | mitogen-activated protein kinase 9                                                                         | 0.8108 | 0.0343 |
| 203234_at   | UPP1     | uridine phosphorylase 1                                                                                    | 1.0411 | 0.0313 |
| 203236_s_at | LGALS9   | lectin; galactoside-binding; soluble; 9 (galectin 9)                                                       | 1.0006 | 0.0164 |
| 203253_s_at | HISPPD1  | histidine acid phosphatase domain containing 1                                                             | 0.4682 | 0.04   |
| 203262_s_at | FAM50A   | family with sequence similarity 50; member A                                                               | 0.541  | 0.0493 |
| 203267_s_at | DRG2     | developmentally regulated GTP binding protein 2                                                            | 0.2962 | 0.0422 |
| 203268_s_at | DRG2     | developmentally regulated GTP binding protein 2                                                            | 0.2842 | 0.043  |
| 203272_s_at | TUSC2    | tumor suppressor candidate 2                                                                               | 0.7629 | 0.0291 |
| 203274_at   | F8A1     | coagulation factor VIII-associated (intronic transcript) 1                                                 | 0.6829 | 0.0329 |
| 203290_at   | HLA-DQA1 | major histocompatibility complex; class II; DQ alpha 1                                                     | 2.9528 | 0.0015 |
| 203291_at   | CNOT4    | CCR4-NOT transcription complex; subunit 4                                                                  | 0.6326 | 0.0236 |
| 203300_x_at | AP1S2    | adaptor-related protein complex 1; sigma 2 subunit                                                         | 1.0122 | 0.003  |
| 203302_at   | DCK      | deoxycytidine kinase                                                                                       | 0.6374 | 0.02   |
| 203305_at   | F13A1    | coagulation factor XIII; A1 polypeptide                                                                    | 1.4166 | 0.0455 |
| 203314_at   | GTPBP6   | GTP binding protein 6 (putative)                                                                           | 0.5974 | 0.0394 |
| 203320_at   | SH2B3    | SH2B adaptor protein 3                                                                                     | 0.881  | 0.0175 |
| 203339_at   | SLC25A12 | solute carrier family 25 (mitochondrial carrier; Aralar); member 12                                        | 1.1052 | 0.0067 |
| 203342_at   | TIMM17B  | translocase of inner mitochondrial membrane 17 homolog B (yeast)                                           | 1.0382 | 0.0142 |
| 203365_s_at | MMP15    | matrix metalloproteinase 15 (membrane-inserted)                                                            | 1.0689 | 0.0167 |
| 203388_at   | ARRB2    | arrestin; beta 2                                                                                           | 1.1382 | 0.0036 |
| 203406_at   | MFAP1    | microfibrillar-associated protein 1                                                                        | 0.9483 | 0.0046 |
| 203407_at   | PPL      | periplakin                                                                                                 | 1.5691 | 0.024  |
| 203413_at   | NELL2    | NEL-like 2 (chicken)                                                                                       | 0.4905 | 0.0005 |
| 203416_at   | CD53     | CD53 molecule                                                                                              | 1.7608 | 0.0218 |
| 203454_s_at | ATOX1    | ATX1 antioxidant protein 1 homolog (yeast)                                                                 | 0.6232 | 0.0157 |
| 203457_at   | STX7     | syntaxin 7                                                                                                 | 0.6522 | 0.0044 |
| 203470_s_at | PLEK     | pleckstrin                                                                                                 | 0.6669 | 0.034  |
| 203471_s_at | PLEK     | pleckstrin                                                                                                 | 1.2275 | 0.0198 |
| 203472_s_at | SLCO2B1  | solute carrier organic anion transporter family; member 2B1                                                | 0.5013 | 0.0006 |
| 203473_at   | SLCO2B1  | solute carrier organic anion transporter family; member 2B1                                                | 1.8711 | 0.0021 |
| 203478_at   | NDUFC1   | NADH dehydrogenase (ubiquinone) 1; subcomplex unknown; 1; 6kDa                                             | 0.2205 | 0.0369 |
| 203485_at   | RTN1     | reticulon 1                                                                                                | 1.693  | 0.0154 |
| 203502_at   | BPGM     | 2;3-bisphosphoglycerate mutase                                                                             | 1.0947 | 0.0009 |
| 203510_at   | MET      | met proto-oncogene (hepatocyte growth factor receptor)                                                     | 3.9422 | 0      |
| 203514_at   | MAP3K3   | mitogen-activated protein kinase kinase kinase 3                                                           | 0.5419 | 0.0426 |
| 203518_at   | LYST     | lysosomal trafficking regulator                                                                            | 0.9794 | 0.0039 |
| 203527_s_at | APC      | adenomatous polyposis coli                                                                                 | 0.5627 | 0.0238 |
| 203547_at   | CD4      | CD4 molecule                                                                                               | 1.0724 | 0.0046 |
| 203557_s_at | PCBD1    | pterin-4 alpha-carbinolamine dehydratase/dimerization cofactor of hepatocyte nuclear factor 1 alpha (TCF1) | 1.0523 | 0.0155 |
| 203561_at   | FCGR2A   | Fc fragment of IgG; low affinity IIa; receptor (CD32)                                                      | 1.1815 | 0.021  |
| 203565_s_at | MNAT1    | menage a trois homolog 1; cyclin H assembly factor (Xenopus laevis)                                        | 0.8291 | 0.045  |

|             |          |                                                                                                                  |        |        |
|-------------|----------|------------------------------------------------------------------------------------------------------------------|--------|--------|
| 203570_at   | LOXL1    | lysyl oxidase-like 1                                                                                             | 1.112  | 0.0478 |
| 203585_at   | ZNF185   | zinc finger protein 185 (LIM domain)                                                                             | 2.7748 | 0.0068 |
| 203591_s_at | CSF3R    | colony stimulating factor 3 receptor (granulocyte)                                                               | 0.2385 | 0.0333 |
| 203606_at   | NDUFS6   | NADH dehydrogenase (ubiquinone) Fe-S protein 6; 13kDa (NADH-coenzyme Q reductase)                                | 0.4931 | 0.0389 |
| 203609_s_at | ALDH5A1  | aldehyde dehydrogenase 5 family; member A1 (succinate-semialdehyde dehydrogenase)                                | 0.1459 | 0.0476 |
| 203635_at   | DSCR3    | Down syndrome critical region gene 3                                                                             | 0.9588 | 0.0088 |
| 203644_s_at | MON1B    | MON1 homolog B (yeast)                                                                                           | 0.7523 | 0.0013 |
| 203661_s_at | TMOD1    | tropomodulin 1                                                                                                   | 1.4404 | 0.0208 |
| 203662_s_at | TMOD1    | tropomodulin 1                                                                                                   | 1.6492 | 0.0131 |
| 203663_s_at | COX5A    | cytochrome c oxidase subunit Va                                                                                  | 0.5334 | 0.0019 |
| 203667_at   | TBCA     | tubulin folding cofactor A                                                                                       | 0.257  | 0.0321 |
| 203678_at   | MTMR15   | myotubularin related protein 15                                                                                  | 0.4603 | 0.0495 |
| 203688_at   | PKD2     | polycystic kidney disease 2 (autosomal dominant)                                                                 | 0.6842 | 0.0461 |
| 203692_s_at | E2F3     | E2F transcription factor 3                                                                                       | 0.9523 | 0.0052 |
| 203695_s_at | DFNA5    | deafness; autosomal dominant 5                                                                                   | 2.7494 | 0.0143 |
| 203696_s_at | RFC2     | replication factor C (activator 1) 2; 40kDa                                                                      | 0.9511 | 0.0335 |
| 203707_at   | ZNF263   | zinc finger protein 263                                                                                          | 0.7508 | 0.0435 |
| 203730_s_at | ZKSCAN5  | zinc finger with KRAB and SCAN domains 5                                                                         | 0.6652 | 0.0399 |
| 203731_s_at | ZKSCAN5  | zinc finger with KRAB and SCAN domains 5                                                                         | 0.3544 | 0.0232 |
| 203733_at   | DEX1     | dexamethasone-induced transcript                                                                                 | 0.934  | 0.0361 |
| 203738_at   | C5orf22  | chromosome 5 open reading frame 22                                                                               | 0.7676 | 0.0332 |
| 203745_at   | HCCS     | holocytochrome c synthase (cytochrome c heme-lyase)                                                              | 0.9139 | 0.0398 |
| 203746_s_at | HCCS     | holocytochrome c synthase (cytochrome c heme-lyase)                                                              | 1.0674 | 0.0161 |
| 203760_s_at | SLA      | Src-like-adaptor                                                                                                 | 0.5873 | 0.021  |
| 203761_at   | SLA      | Src-like-adaptor                                                                                                 | 1.3751 | 0.0279 |
| 203767_s_at | STS      | steroid sulfatase (microsomal); isozyme S                                                                        | 1.6419 | 0.0049 |
| 203768_s_at | STS      | steroid sulfatase (microsomal); isozyme S                                                                        | 0.6278 | 0.0005 |
| 203769_s_at | STS      | steroid sulfatase (microsomal); isozyme S                                                                        | 0.7866 | 0.0212 |
| 203770_s_at | STS      | steroid sulfatase (microsomal); isozyme S                                                                        | 0.2327 | 0.0389 |
| 203771_s_at | BLVRA    | biliverdin reductase A                                                                                           | 0.7188 | 0.0141 |
| 203776_at   | GPKOW    | G patch domain and KOW motifs                                                                                    | 0.9226 | 0.0105 |
| 203879_at   | PIK3CD   | phosphoinositide-3-kinase; catalytic; delta polypeptide                                                          | 1.6509 | 0.0065 |
| 203888_at   | THBD     | thrombomodulin                                                                                                   | 0.8295 | 0.0319 |
| 203893_at   | TAF9     | TAF9 RNA polymerase II; TATA box binding protein (TBP)-associated factor; 32kDa                                  | 0.4875 | 0.0041 |
| 203912_s_at | DNASE1L1 | deoxyribonuclease I-like 1                                                                                       | 1.2542 | 0.0064 |
| 203915_at   | CXCL9    | chemokine (C-X-C motif) ligand 9                                                                                 | 1.6581 | 0.0189 |
| 203922_s_at | CYBB     | cytochrome b-245; beta polypeptide (chronic granulomatous disease)                                               | 0.711  | 0.0026 |
| 203923_s_at | CYBB     | cytochrome b-245; beta polypeptide (chronic granulomatous disease)                                               | 1.9602 | 0.0014 |
| 203925_at   | GCLM     | glutamate-cysteine ligase; modifier subunit                                                                      | 1.2333 | 0.0148 |
| 203927_at   | NFKBIE   | nuclear factor of kappa light polypeptide gene enhancer in B-cells inhibitor; epsilon                            | 0.6692 | 0.0038 |
| 203932_at   | HLA-DMB  | major histocompatibility complex; class II; DM beta                                                              | 1.3709 | 0.0187 |
| 203939_at   | NT5E     | 5'-nucleotidase; ecto (CD73)                                                                                     | 0.8798 | 0.0286 |
| 203974_at   | HDHD1A   | haloacid dehalogenase-like hydrolase domain containing 1A                                                        | 1.3191 | 0.0119 |
| 203977_at   | TAZ      | tafazzin (cardiomyopathy; dilated 3A (X-linked); endocardial fibroelastosis 2; Barth syndrome)                   | 0.3837 | 0.0157 |
| 203988_s_at | FUT8     | fucosyltransferase 8 (alpha (1;6) fucosyltransferase)                                                            | 1.2487 | 0.0187 |
| 204006_s_at | FCGR3A   | Fc fragment of IgG; low affinity IIIa; receptor (CD16a), Fc fragment of IgG; low affinity IIIb; receptor (CD16b) | 0.8847 | 0.0143 |
| 204007_at   | FCGR3B   | Fc fragment of IgG; low affinity IIIb; receptor (CD16b)                                                          | 0.4706 | 0.0321 |
| 204012_s_at | LCMT2    | leucine carboxyl methyltransferase 2                                                                             | 0.7931 | 0.0324 |
| 204024_at   | OSGIN2   | oxidative stress induced growth inhibitor family member 2                                                        | 0.5643 | 0.035  |
| 204034_at   | ETHE1    | ethylmalonic encephalopathy 1                                                                                    | 1.5759 | 0.0029 |
| 204035_at   | SCG2     | secretogranin II (chromogranin C)                                                                                | 2.185  | 0.0214 |
| 204039_at   | CEBPA    | CCAAT/enhancer binding protein (C/EBP); alpha                                                                    | 1.7927 | 0.0083 |

|             |          |                                                                                           |        |        |
|-------------|----------|-------------------------------------------------------------------------------------------|--------|--------|
| 204043_at   | TCN2     | transcobalamin II; macrocytic anemia                                                      | 0.9097 | 0.0126 |
| 204045_at   | TCEAL1   | transcription elongation factor A (SII)-like 1                                            | 0.7777 | 0.0063 |
| 204057_at   | IRF8     | interferon regulatory factor 8                                                            | 1.3188 | 0.0057 |
| 204061_at   | PRKX     | protein kinase; X-linked                                                                  | 0.607  | 0.0153 |
| 204070_at   | RARRES3  | retinoic acid receptor responder (tazarotene induced) 3                                   | 1.5449 | 0.017  |
| 204093_at   | CCNH     | cyclin H                                                                                  | 0.7132 | 0.0253 |
| 204096_s_at | ELL      | elongation factor RNA polymerase II                                                       | 0.2222 | 0.0044 |
| 204097_s_at | RBMX2    | RNA binding motif protein; X-linked 2                                                     | 0.805  | 0.0121 |
| 204098_at   | RBMX2    | RNA binding motif protein; X-linked 2                                                     | 0.65   | 0.0218 |
| 204101_at   | MTM1     | myotubularin 1                                                                            | 0.8461 | 0.0002 |
| 204116_at   | IL2RG    | interleukin 2 receptor; gamma (severe combined immunodeficiency)                          | 0.9746 | 0.0024 |
| 204118_at   | CD48     | CD48 molecule                                                                             | 1.2975 | 0.0206 |
| 204119_s_at | ADK      | adenosine kinase                                                                          | 1.3567 | 0.0018 |
| 204120_s_at | ADK      | adenosine kinase                                                                          | 0.6831 | 0.0195 |
| 204122_at   | TYROBP   | TYRO protein tyrosine kinase binding protein                                              | 1.6776 | 0.0162 |
| 204160_s_at | ENPP4    | ectonucleotide pyrophosphatase/phosphodiesterase 4 (putative function)                    | 2.6428 | 0.0009 |
| 204161_s_at | ENPP4    | ectonucleotide pyrophosphatase/phosphodiesterase 4 (putative function)                    | 1.4249 | 0.0006 |
| 204174_at   | ALOX5AP  | arachidonate 5-lipoxygenase-activating protein                                            | 1.6767 | 0.0213 |
| 204175_at   | ZNF593   | zinc finger protein 593                                                                   | 0.7021 | 0.0416 |
| 204185_x_at | PPID     | peptidylprolyl isomerase D (cyclophilin D)                                                | 0.5307 | 0.0089 |
| 204186_s_at | PPID     | peptidylprolyl isomerase D (cyclophilin D)                                                | 0.855  | 0.0144 |
| 204192_at   | CD37     | CD37 molecule                                                                             | 0.6802 | 0.0336 |
| 204203_at   | CEBPG    | CCAAT/enhancer binding protein (C/EBP); gamma                                             | 1.0293 | 0.0231 |
| 204215_at   | C7orf23  | chromosome 7 open reading frame 23                                                        | 1.2068 | 0.0067 |
| 204219_s_at | PSMC1    | proteasome (prosome; macropain) 26S subunit; ATPase; 1                                    | 0.538  | 0.0098 |
| 204220_at   | GMFG     | glia maturation factor; gamma                                                             | 0.9817 | 0.0455 |
| 204224_s_at | GCH1     | GTP cyclohydrolase 1 (dopa-responsive dystonia)                                           | 1.3197 | 0.0413 |
| 204227_s_at | TK2      | thymidine kinase 2; mitochondrial                                                         | 0.8263 | 0.032  |
| 204232_at   | FCER1G   | Fc fragment of IgE; high affinity I; receptor for; gamma polypeptide                      | 1.7403 | 0.0163 |
| 204236_at   | FLI1     | Friend leukemia virus integration 1                                                       | 0.7235 | 0.0452 |
| 204247_s_at | CDK5     | cyclin-dependent kinase 5                                                                 | 1.057  | 0.0029 |
| 204265_s_at | GPSM3    | G-protein signaling modulator 3 (AGS3-like; C. elegans)                                   | 1.0836 | 0.0076 |
| 204279_at   | PSMB9    | proteasome (prosome; macropain) subunit; beta type; 9 (large multifunctional peptidase 2) | 2.0361 | 0.0089 |
| 204300_at   | PET112L  | PET112-like (yeast)                                                                       | 0.7827 | 0.0371 |
| 204319_s_at | RGS10    | regulator of G-protein signaling 10                                                       | 1.7183 | 0.0065 |
| 204321_at   | NEO1     | neogenin homolog 1 (chicken)                                                              | 0.86   | 0.0307 |
| 204331_s_at | MRPS12   | mitochondrial ribosomal protein S12                                                       | 0.6701 | 0.0452 |
| 204332_s_at | AGA      | aspartylglucosaminidase                                                                   | 1.3312 | 0.0123 |
| 204333_s_at | AGA      | aspartylglucosaminidase                                                                   | 1.7032 | 0.0039 |
| 204336_s_at | RGS19    | regulator of G-protein signaling 19                                                       | 1.0741 | 0.018  |
| 204340_at   | TMEM187  | transmembrane protein 187                                                                 | 0.9293 | 0.0092 |
| 204343_at   | ABCA3    | ATP-binding cassette; sub-family A (ABC1); member 3                                       | 1.0081 | 0.0203 |
| 204353_s_at | POT1     | POT1 protection of telomeres 1 homolog (S. pombe)                                         | 1.0939 | 0.0039 |
| 204354_at   | POT1     | POT1 protection of telomeres 1 homolog (S. pombe)                                         | 0.6504 | 0.0021 |
| 204357_s_at | LIMK1    | LIM domain kinase 1                                                                       | 0.3672 | 0.0303 |
| 204393_s_at | ACPP     | acid phosphatase; prostate                                                                | 1.2276 | 0.0076 |
| 204405_x_at | DIMT1L   | DIM1 dimethyladenosine transferase 1-like (S. cerevisiae)                                 | 0.6117 | 0.009  |
| 204408_at   | APEX2    | APEX nuclease (apurinic/apurimidinic endonuclease) 2                                      | 1.0792 | 0.0139 |
| 204436_at   | PLEKHQ1  | pleckstrin homology domain containing; family Q member 1                                  | 0.9843 | 0.0225 |
| 204439_at   | IFI44L   | interferon-induced protein 44-like                                                        | 2.0201 | 0.0493 |
| 204470_at   | CXCL1    | chemokine (C-X-C motif) ligand 1 (melanoma growth stimulating activity; alpha)            | 0.295  | 0.0236 |
| 204493_at   | BID      | BH3 interacting domain death agonist                                                      | 0.6679 | 0.0486 |
| 204495_s_at | C15orf39 | chromosome 15 open reading frame 39                                                       | 0.5395 | 0.0371 |

|             |          |                                                                                                                                                                   |        |        |
|-------------|----------|-------------------------------------------------------------------------------------------------------------------------------------------------------------------|--------|--------|
| 204513_s_at | ELMO1    | engulfment and cell motility 1                                                                                                                                    | 1.0019 | 0.0143 |
| 204532_x_at | UGT1A4   | UDP glucuronosyltransferase 1 family; polypeptide A4                                                                                                              | 1.7102 | 0.0219 |
| 204533_at   | CXCL10   | chemokine (C-X-C motif) ligand 10                                                                                                                                 | 1.8326 | 0.005  |
| 204536_s_at |          |                                                                                                                                                                   | 0.146  | 0.0358 |
| 204546_at   | KIAA0513 | KIAA0513                                                                                                                                                          | 1.3042 | 0.0157 |
| 204549_at   | IKBKE    | inhibitor of kappa light polypeptide gene enhancer in B-cells; kinase epsilon                                                                                     | 0.2854 | 0.0359 |
| 204552_at   |          | CDNA FLJ34214 fis; clone FCBBF3021807                                                                                                                             | 0.9459 | 0.0191 |
| 204554_at   | PPP1R3D  | protein phosphatase 1; regulatory (inhibitor) subunit 3D                                                                                                          | 1.2089 | 0.0006 |
| 204563_at   | SELL     | selectin L (lymphocyte adhesion molecule 1)                                                                                                                       | 0.9566 | 0.0239 |
| 204565_at   | THEM2    | thioesterase superfamily member 2                                                                                                                                 | 0.6923 | 0.0159 |
| 204571_x_at | PIN4     | protein (peptidylprolyl cis/trans isomerase) NIMA-interacting; 4 (parvulin)                                                                                       | 0.7293 | 0.0024 |
| 204587_at   | SLC25A14 | solute carrier family 25 (mitochondrial carrier; brain); member 14                                                                                                | 1.0838 | 0.0023 |
| 204604_at   | PFTK1    | PFTAIRE protein kinase 1                                                                                                                                          | 1.7671 | 0.001  |
| 204618_s_at | GABPB2   | GA binding protein transcription factor; beta subunit 2                                                                                                           | 0.4888 | 0.0129 |
| 204625_s_at | ITGB3    | integrin; beta 3 (platelet glycoprotein IIIa; antigen CD61)                                                                                                       | 0.1192 | 0.0305 |
| 204643_s_at | ENOX2    | ecto-NOX disulfide-thiol exchanger 2                                                                                                                              | 1.0207 | 0.0026 |
| 204670_x_at | HLA-DRB1 | hypothetical protein LOC730415, major histocompatibility complex; class II; DR beta 1                                                                             | 1.8206 | 0.02   |
| 204674_at   | LRMP     | lymphoid-restricted membrane protein                                                                                                                              | 0.4351 | 0.0199 |
| 204676_at   | TMEM186  | transmembrane protein 186                                                                                                                                         | 0.6596 | 0.0199 |
| 204701_s_at | STOML1   | stomatin (EPB72)-like 1                                                                                                                                           | 1.3031 | 0.0038 |
| 204766_s_at | NUDT1    | nudix (nucleoside diphosphate linked moiety X)-type motif 1                                                                                                       | 0.8017 | 0.0341 |
| 204770_at   | TAP2     | transporter 2; ATP-binding cassette; sub-family B (MDR/TAP)                                                                                                       | 0.6239 | 0.0154 |
| 204774_at   | EVI2A    | ecotropic viral integration site 2A                                                                                                                               | 1.4799 | 0.0025 |
| 204777_s_at | MAL      | mal; T-cell differentiation protein                                                                                                                               | 0.2215 | 0.0273 |
| 204789_at   | FMNL1    | formin-like 1                                                                                                                                                     | 0.5097 | 0.0352 |
| 204796_at   | EML1     | echinoderm microtubule associated protein like 1                                                                                                                  | 1.668  | 0.0065 |
| 204797_s_at | EML1     | echinoderm microtubule associated protein like 1                                                                                                                  | 1.8299 | 0.0113 |
| 204802_at   | RRAD     | Ras-related associated with diabetes                                                                                                                              | 2.1511 | 0.0105 |
| 204803_s_at | RRAD     | Ras-related associated with diabetes                                                                                                                              | 1.1629 | 0.0178 |
| 204806_x_at | HLA-F    | major histocompatibility complex; class I; F                                                                                                                      | 0.8549 | 0.0014 |
| 204819_at   | FGD1     | FYVE; RhoGEF and PH domain containing 1 (faciogenital dysplasia)                                                                                                  | 1.0571 | 0.0314 |
| 204826_at   | CCNF     | cyclin F                                                                                                                                                          | 0.3323 | 0.0265 |
| 204827_s_at | CCNF     | cyclin F                                                                                                                                                          | 0.2689 | 0.0135 |
| 204829_s_at | FOLR2    | folate receptor 2 (fetal)                                                                                                                                         | 1.1413 | 0.02   |
| 204834_at   | FGL2     | fibrinogen-like 2                                                                                                                                                 | 1.4701 | 0.0016 |
| 204838_s_at | MLH3     | mutL homolog 3 (E. coli)                                                                                                                                          | 1.5477 | 0.018  |
| 204871_at   | MTERF    | mitochondrial transcription termination factor                                                                                                                    | 0.7482 | 0.0291 |
| 204883_s_at | HUS1     | HUS1 checkpoint homolog (S. pombe)                                                                                                                                | 0.7558 | 0.0254 |
| 204890_s_at | LCK      | lymphocyte-specific protein tyrosine kinase                                                                                                                       | 0.277  | 0.0187 |
| 204891_s_at | LCK      | lymphocyte-specific protein tyrosine kinase                                                                                                                       | 0.9692 | 0.0257 |
| 204907_s_at | BCL3     | B-cell CLL/lymphoma 3                                                                                                                                             | 0.2776 | 0.0182 |
| 204909_at   | DDX6     | DEAD (Asp-Glu-Ala-Asp) box polypeptide 6                                                                                                                          | 0.2715 | 0.0123 |
| 204912_at   | IL10RA   | interleukin 10 receptor; alpha                                                                                                                                    | 1.5497 | 0.0136 |
| 204923_at   | CXorf9   | chromosome X open reading frame 9                                                                                                                                 | 1.0893 | 0.0125 |
| 204928_s_at | SLC10A3  | solute carrier family 10 (sodium/bile acid cotransporter family); member 3                                                                                        | 1.5168 | 0      |
| 204951_at   | RHOH     | ras homolog gene family; member H                                                                                                                                 | 0.2756 | 0.0162 |
| 204960_at   | CORO1B   | coronin; actin binding protein; 1B, protein tyrosine phosphatase; receptor type; C-associated protein                                                             | 0.4439 | 0.0482 |
| 204961_s_at | NCF1     | neutrophil cytosolic factor 1; (chronic granulomatous disease; autosomal 1), neutrophil cytosolic factor 1B pseudogene, neutrophil cytosolic factor 1C pseudogene | 0.4176 | 0.0128 |
| 204976_s_at | AMMECR1  | Alport syndrome; mental retardation; midface hypoplasia and elliptocytosis chromosomal region; gene 1                                                             | 1.1049 | 0.0431 |
| 204979_s_at | SH3BGR   | SH3 domain binding glutamic acid-rich protein                                                                                                                     | 1.1273 | 0.0238 |

|             |          |                                                                                   |        |        |
|-------------|----------|-----------------------------------------------------------------------------------|--------|--------|
| 204983_s_at | GPC4     | glypican 4                                                                        | 1.0209 | 0.0094 |
| 204984_at   | GPC4     | glypican 4                                                                        | 1.29   | 0.0457 |
| 204989_s_at | ITGB4    | integrin; beta 4                                                                  | 0.196  | 0.0158 |
| 204990_s_at | ITGB4    | integrin; beta 4                                                                  | 0.2791 | 0.0051 |
| 204994_at   | MX2      | myxovirus (influenza virus) resistance 2 (mouse)                                  | 1.4468 | 0.0214 |
| 205003_at   | DOCK4    | dedicator of cytokinesis 4                                                        | 1.436  | 0.0105 |
| 205008_s_at | CIB2     | calcium and integrin binding family member 2                                      | 1.3453 | 0.006  |
| 205036_at   | LSM6     | LSM6 homolog; U6 small nuclear RNA associated (S. cerevisiae)                     | 0.4304 | 0.0271 |
| 205038_at   | IKZF1    | IKAROS family zinc finger 1 (Ikaros)                                              | 0.2448 | 0.0225 |
| 205039_s_at | IKZF1    | IKAROS family zinc finger 1 (Ikaros)                                              | 0.3066 | 0.0092 |
| 205047_s_at | ASNS     | asparagine synthetase                                                             | 0.9389 | 0.0247 |
| 205061_s_at | EXOSC9   | exosome component 9                                                               | 0.5762 | 0.0009 |
| 205068_s_at | ARHGAP26 | Rho GTPase activating protein 26                                                  | 0.5107 | 0.0195 |
| 205072_s_at | XRCC4    | X-ray repair complementing defective repair in Chinese hamster cells 4            | 0.5185 | 0.013  |
| 205074_at   | SLC22A5  | solute carrier family 22 (organic cation transporter); member 5                   | 1.0108 | 0.0433 |
| 205098_at   | CCR1     | chemokine (C-C motif) receptor 1                                                  | 1.3493 | 0.0429 |
| 205099_s_at | CCR1     | chemokine (C-C motif) receptor 1                                                  | 0.9422 | 0.0392 |
| 205115_s_at | RBM19    | RNA binding motif protein 19                                                      | 1.2916 | 0.01   |
| 205140_at   | FPGT     | fucose-1-phosphate guanylyltransferase                                            | 0.7398 | 0.0315 |
| 205147_x_at | NCF4     | neutrophil cytosolic factor 4; 40kDa                                              | 0.6516 | 0.0244 |
| 205159_at   | CSF2RB   | colony stimulating factor 2 receptor; beta; low-affinity (granulocyte-macrophage) | 1.195  | 0.0164 |
| 205173_x_at | CD58     | CD58 molecule                                                                     | 1.5554 | 0.0244 |
| 205213_at   | CENTB1   | centaurin; beta 1                                                                 | 0.4991 | 0.0242 |
| 205217_at   | TIMM8A   | translocase of inner mitochondrial membrane 8 homolog A (yeast)                   | 0.9947 | 0.0103 |
| 205238_at   | CXorf34  | chromosome X open reading frame 34                                                | 1.1025 | 0.0351 |
| 205242_at   | CXCL13   | chemokine (C-X-C motif) ligand 13 (B-cell chemoattractant)                        | 1.5414 | 0.023  |
| 205248_at   | DOPEY2   | dopey family member 2                                                             | 0.6577 | 0.0077 |
| 205252_at   | ZNF174   | zinc finger protein 174                                                           | 0.3199 | 0.034  |
| 205262_at   | KCNH2    | potassium voltage-gated channel; subfamily H (eag-related); member 2              | 1.8654 | 0.0314 |
| 205269_at   | LCP2     | lymphocyte cytosolic protein 2 (SH2 domain containing leukocyte protein of 76kDa) | 1.1308 | 0.0432 |
| 205270_s_at | LCP2     | lymphocyte cytosolic protein 2 (SH2 domain containing leukocyte protein of 76kDa) | 1.1509 | 0.0095 |
| 205279_s_at | GLRB     | glycine receptor; beta                                                            | 1.8197 | 0.0004 |
| 205280_at   | GLRB     | glycine receptor; beta                                                            | 2.1461 | 0.0018 |
| 205285_s_at | FYB      | FYN binding protein (FYB-120/130)                                                 | 0.3308 | 0.0266 |
| 205291_at   | IL2RB    | interleukin 2 receptor; beta                                                      | 0.8403 | 0.0013 |
| 205312_at   | SPI1     | spleen focus forming virus (SFFV) proviral integration oncogene spi1              | 0.2439 | 0.0248 |
| 205326_at   | RAMP3    | receptor (G protein-coupled) activity modifying protein 3                         | 0.9931 | 0.045  |
| 205352_at   | SERPINI1 | serpin peptidase inhibitor; clade I (neuroserpin); member 1                       | 2.2456 | 0.0011 |
| 205397_x_at | SMAD3    | SMAD family member 3                                                              | 0.4131 | 0.0019 |
| 205412_at   | ACAT1    | acetyl-Coenzyme A acetyltransferase 1 (acetoacetyl Coenzyme A thiolase)           | 0.6165 | 0.0239 |
| 205414_s_at | RICH2    | Rho-type GTPase-activating protein RICH2                                          | 0.4856 | 0.0308 |
| 205429_s_at | MPP6     | membrane protein; palmitoylated 6 (MAGUK p55 subfamily member 6)                  | 2.0341 | 0.0006 |
| 205450_at   | PHKA1    | phosphorylase kinase; alpha 1 (muscle)                                            | 0.7283 | 0.0366 |
| 205452_at   | PIGB     | phosphatidylinositol glycan anchor biosynthesis; class B                          | 1.1885 | 0.0015 |
| 205488_at   | GZMA     | granzyme A (granzyme 1; cytotoxic T-lymphocyte-associated serine esterase 3)      | 1.6642 | 0.0053 |
| 205495_s_at | GNLY     | granulysin                                                                        | 1.1517 | 0.0115 |
| 205504_at   | BTK      | Bruton agammaglobulinemia tyrosine kinase                                         | 0.3604 | 0.0298 |
| 205512_s_at | AIFM1    | apoptosis-inducing factor; mitochondrion-associated; 1                            | 1.2584 | 0.0101 |

|             |          |                                                                                   |        |        |
|-------------|----------|-----------------------------------------------------------------------------------|--------|--------|
| 205540_s_at | RRAGB    | Ras-related GTP binding B                                                         | 0.9484 | 0.0364 |
| 205542_at   | STEAP1   | six transmembrane epithelial antigen of the prostate 1                            | 1.5581 | 0.0264 |
| 205543_at   | HSPA4L   | heat shock 70kDa protein 4-like                                                   | 1.0036 | 0.0148 |
| 205544_s_at | CR2      | complement component (3d/Epstein Barr virus) receptor 2                           | 0.2983 | 0.014  |
| 205555_s_at | MSX2     | msh homeobox 2                                                                    | 0.2213 | 0.0391 |
| 205569_at   | LAMP3    | lysosomal-associated membrane protein 3                                           | 1.0479 | 0.0051 |
| 205583_s_at | CXorf45  | chromosome X open reading frame 45                                                | 0.9058 | 0.034  |
| 205584_at   | CXorf45  | chromosome X open reading frame 45                                                | 0.7837 | 0.0282 |
| 205618_at   | PRRG1    | proline rich Gla (G-carboxyglutamic acid) 1                                       | 1.3926 | 0.0081 |
| 205621_at   | ALKBH1   | alkB; alkylation repair homolog 1 (E. coli)                                       | 0.606  | 0.0323 |
| 205639_at   | AOAH     | acyloxyacyl hydrolase (neutrophil)                                                | 0.8976 | 0.0145 |
| 205659_at   | HDAC9    | histone deacetylase 9                                                             | 1.422  | 0.0037 |
| 205663_at   | PCBP3    | poly(rC) binding protein 3                                                        | 0.4737 | 0.0243 |
| 205671_s_at | HLA-DOB  | major histocompatibility complex; class II; DO beta                               | 0.2821 | 0.018  |
| 205682_x_at | APOM     | apolipoprotein M                                                                  | 0.2496 | 0.0476 |
| 205685_at   | CD86     | CD86 molecule                                                                     | 0.6245 | 0.0471 |
| 205686_s_at | CD86     | CD86 molecule                                                                     | 0.8536 | 0.0137 |
| 205690_s_at | BUD31    | BUD31 homolog (S. cerevisiae)                                                     | 0.487  | 0.0394 |
| 205696_s_at | GFRA1    | GDNF family receptor alpha 1                                                      | 0.2245 | 0.0027 |
| 205708_s_at | TRPM2    | transient receptor potential cation channel; subfamily M; member 2                | 0.4228 | 0.0488 |
| 205718_at   | ITGB7    | integrin; beta 7                                                                  | 0.3264 | 0.0322 |
| 205761_s_at | DUS4L    | dihydrouridine synthase 4-like (S. cerevisiae)                                    | 0.8193 | 0.0331 |
| 205768_s_at | SLC27A2  | solute carrier family 27 (fatty acid transporter); member 2                       | 2.2681 | 0.0103 |
| 205769_at   | SLC27A2  | solute carrier family 27 (fatty acid transporter); member 2                       | 2.2057 | 0.0051 |
| 205778_at   | KLK7     | kallikrein-related peptidase 7                                                    | 0.1187 | 0.0316 |
| 205781_at   | C16orf7  | chromosome 16 open reading frame 7                                                | 0.3746 | 0.0199 |
| 205786_s_at | ITGAM    | integrin; alpha M (complement component 3 receptor 3 subunit)                     | 0.936  | 0.0372 |
| 205789_at   | CD1D     | CD1d molecule                                                                     | 0.5782 | 0.021  |
| 205798_at   | IL7R     | interleukin 7 receptor                                                            | 2.2523 | 0.0091 |
| 205821_at   | KLRK1    | killer cell lectin-like receptor subfamily K; member 1                            | 1.0732 | 0.0038 |
| 205831_at   | CD2      | CD2 molecule                                                                      | 1.2578 | 0.0138 |
| 205833_s_at | PART1    | prostate androgen-regulated transcript 1                                          | 0.195  | 0.0369 |
| 205859_at   | LY86     | lymphocyte antigen 86                                                             | 1.5788 | 0.0063 |
| 205890_s_at | UBD      | ubiquitin D                                                                       | 1.1188 | 0.0348 |
| 205896_at   | SLC22A4  | solute carrier family 22 (organic cation transporter); member 4                   | 0.9332 | 0.0187 |
| 205898_at   | CX3CR1   | chemokine (C-X3-C motif) receptor 1                                               | 1.8944 | 0.0137 |
| 205920_at   | SLC6A6   | solute carrier family 6 (neurotransmitter transporter; taurine); member 6         | 0.9814 | 0.0197 |
| 205921_s_at | SLC6A6   | solute carrier family 6 (neurotransmitter transporter; taurine); member 6         | 0.2683 | 0.0475 |
| 205931_s_at | CREB5    | cAMP responsive element binding protein 5                                         | 0.5434 | 0.0238 |
| 205934_at   | PLCL1    | phospholipase C-like 1                                                            | 1.1389 | 0.0167 |
| 205937_at   | CGREF1   | cell growth regulator with EF-hand domain 1                                       | 0.2243 | 0.0429 |
| 205965_at   | BATF     | basic leucine zipper transcription factor; ATF-like                               | 0.2097 | 0.0456 |
| 205984_at   | CRHBP    | corticotropin releasing hormone binding protein                                   | 0.9374 | 0.0213 |
| 205987_at   | CD1C     | CD1c molecule                                                                     | 0.4977 | 0.0164 |
| 205988_at   | CD84     | CD84 molecule                                                                     | 1.0333 | 0.0071 |
| 205997_at   | ADAM28   | ADAM metallopeptidase domain 28                                                   | 0.5773 | 0.0124 |
| 206006_s_at | KIAA1009 | KIAA1009                                                                          | 0.3061 | 0.0436 |
| 206011_at   | CASP1    | caspase 1; apoptosis-related cysteine peptidase (interleukin 1; beta; convertase) | 1.2631 | 0.0124 |
| 206049_at   | SELP     | selectin P (granule membrane protein 140kDa; antigen CD62)                        | 1.0928 | 0.0126 |
| 206052_s_at | SLBP     | stem-loop (histone) binding protein                                               | 0.4819 | 0.0239 |
| 206060_s_at | PTPN22   | protein tyrosine phosphatase; non-receptor type 22 (lymphoid)                     | 0.4346 | 0.0195 |
| 206062_at   | GUCA1A   | guanylate cyclase activator 1A (retina)                                           | 0.1131 | 0.0402 |
| 206068_s_at | ACADL    | acyl-Coenzyme A dehydrogenase; long chain                                         | 2.3728 | 0.0245 |

|             |          |                                                                                                                                                                                                                                                                                                                                                                                                                                                                                                       |        |        |
|-------------|----------|-------------------------------------------------------------------------------------------------------------------------------------------------------------------------------------------------------------------------------------------------------------------------------------------------------------------------------------------------------------------------------------------------------------------------------------------------------------------------------------------------------|--------|--------|
| 206069_s_at | ACADL    | acyl-Coenzyme A dehydrogenase; long chain                                                                                                                                                                                                                                                                                                                                                                                                                                                             | 2.5481 | 0.0094 |
| 206074_s_at | HMGA1    | high mobility group AT-hook 1                                                                                                                                                                                                                                                                                                                                                                                                                                                                         | 1.2445 | 0.0301 |
| 206076_at   | LRRC23   | leucine rich repeat containing 23                                                                                                                                                                                                                                                                                                                                                                                                                                                                     | 0.7194 | 0.0335 |
| 206082_at   | HCP5     | HLA complex P5                                                                                                                                                                                                                                                                                                                                                                                                                                                                                        | 2.2324 | 0.0001 |
| 206087_x_at | HFE      | hemochromatosis                                                                                                                                                                                                                                                                                                                                                                                                                                                                                       | 0.7695 | 0.0261 |
| 206090_s_at | DISC1    | disrupted in schizophrenia 1                                                                                                                                                                                                                                                                                                                                                                                                                                                                          | 0.6382 | 0.037  |
| 206094_x_at | UGT1A1   | UDP glucuronosyltransferase 1 family; polypeptide A1, UDP glucuronosyltransferase 1 family; polypeptide A10, UDP glucuronosyltransferase 1 family; polypeptide A3, UDP glucuronosyltransferase 1 family; polypeptide A4, UDP glucuronosyltransferase 1 family; polypeptide A5, UDP glucuronosyltransferase 1 family; polypeptide A6, UDP glucuronosyltransferase 1 family; polypeptide A7, UDP glucuronosyltransferase 1 family; polypeptide A8, UDP glucuronosyltransferase 1 family; polypeptide A9 | 1.3962 | 0.0387 |
| 206118_at   | STAT4    | signal transducer and activator of transcription 4                                                                                                                                                                                                                                                                                                                                                                                                                                                    | 0.5904 | 0.001  |
| 206120_at   | CD33     | CD33 molecule                                                                                                                                                                                                                                                                                                                                                                                                                                                                                         | 0.4446 | 0.0112 |
| 206129_s_at | ARSB     | arylsulfatase B                                                                                                                                                                                                                                                                                                                                                                                                                                                                                       | 0.3645 | 0.0237 |
| 206150_at   | CD27     | CD27 molecule                                                                                                                                                                                                                                                                                                                                                                                                                                                                                         | 0.3412 | 0.0199 |
| 206170_at   | ADRB2    | adrenergic; beta-2-; receptor; surface                                                                                                                                                                                                                                                                                                                                                                                                                                                                | 0.3898 | 0.0035 |
| 206181_at   | SLAMF1   | signaling lymphocytic activation molecule family member 1                                                                                                                                                                                                                                                                                                                                                                                                                                             | 0.1799 | 0.0315 |
| 206219_s_at | VAV1     | vav 1 guanine nucleotide exchange factor                                                                                                                                                                                                                                                                                                                                                                                                                                                              | 0.2595 | 0.0237 |
| 206227_at   | CILP     | cartilage intermediate layer protein; nucleotide pyrophosphohydrolase                                                                                                                                                                                                                                                                                                                                                                                                                                 | 0.2427 | 0.0168 |
| 206247_at   | MICB     | MHC class I polypeptide-related sequence B                                                                                                                                                                                                                                                                                                                                                                                                                                                            | 2.4218 | 0.0044 |
| 206256_at   | CPN1     | carboxypeptidase N; polypeptide 1                                                                                                                                                                                                                                                                                                                                                                                                                                                                     | 0.1623 | 0.0323 |
| 206260_at   | TGM4     | transglutaminase 4 (prostate)                                                                                                                                                                                                                                                                                                                                                                                                                                                                         | 0.2289 | 0.0079 |
| 206299_at   | TMEM28   | transmembrane protein 28                                                                                                                                                                                                                                                                                                                                                                                                                                                                              | 1.0663 | 0.0262 |
| 206306_at   | RYR3     | ryanodine receptor 3                                                                                                                                                                                                                                                                                                                                                                                                                                                                                  | 0.9851 | 0.043  |
| 206313_at   | HLA-DOA  | major histocompatibility complex; class II; DO alpha                                                                                                                                                                                                                                                                                                                                                                                                                                                  | 0.3407 | 0.0123 |
| 206337_at   | CCR7     | chemokine (C-C motif) receptor 7                                                                                                                                                                                                                                                                                                                                                                                                                                                                      | 0.2921 | 0.0272 |
| 206342_x_at | IDS      | iduronate 2-sulfatase (Hunter syndrome)                                                                                                                                                                                                                                                                                                                                                                                                                                                               | 1.3066 | 0.0412 |
| 206346_at   | PRLR     | prolactin receptor                                                                                                                                                                                                                                                                                                                                                                                                                                                                                    | 1.6174 | 0.0495 |
| 206347_at   | PDK3     | pyruvate dehydrogenase kinase; isozyme 3                                                                                                                                                                                                                                                                                                                                                                                                                                                              | 0.1987 | 0.0204 |
| 206366_x_at | XCL2     | chemokine (C motif) ligand 2                                                                                                                                                                                                                                                                                                                                                                                                                                                                          | 0.9009 | 0.0004 |
| 206407_s_at | CCL13    | chemokine (C-C motif) ligand 13                                                                                                                                                                                                                                                                                                                                                                                                                                                                       | 0.3552 | 0.0155 |
| 206410_at   | NR0B2    | nuclear receptor subfamily 0; group B; member 2                                                                                                                                                                                                                                                                                                                                                                                                                                                       | 2.1452 | 0.0224 |
| 206420_at   | IGSF6    | immunoglobulin superfamily; member 6                                                                                                                                                                                                                                                                                                                                                                                                                                                                  | 1.3457 | 0.0134 |
| 206441_s_at | COMMD4   | COMM domain containing 4                                                                                                                                                                                                                                                                                                                                                                                                                                                                              | 0.8529 | 0.0007 |
| 206449_s_at | MASP1    | mannan-binding lectin serine peptidase 1 (C4/C2 activating component of Ra-reactive factor)                                                                                                                                                                                                                                                                                                                                                                                                           | 0.4133 | 0.0377 |
| 206468_s_at | KIAA0859 | KIAA0859                                                                                                                                                                                                                                                                                                                                                                                                                                                                                              | 1.0938 | 0.0103 |
| 206480_at   | LTC4S    | leukotriene C4 synthase                                                                                                                                                                                                                                                                                                                                                                                                                                                                               | 0.3406 | 0.0221 |
| 206512_at   | ZRSR1    | zinc finger (CCCH type); RNA-binding motif and serine/arginine rich 1                                                                                                                                                                                                                                                                                                                                                                                                                                 | 0.3641 | 0.0289 |
| 206513_at   | AIM2     | absent in melanoma 2                                                                                                                                                                                                                                                                                                                                                                                                                                                                                  | 0.4306 | 0.0113 |
| 206538_at   | MRAS     | muscle RAS oncogene homolog                                                                                                                                                                                                                                                                                                                                                                                                                                                                           | 0.5667 | 0.0407 |
| 206553_at   | OAS2     | 2'-5'-oligoadenylate synthetase 2; 69/71kDa                                                                                                                                                                                                                                                                                                                                                                                                                                                           | 0.2346 | 0.0345 |
| 206554_x_at | SETMAR   | SET domain and mariner transposase fusion gene                                                                                                                                                                                                                                                                                                                                                                                                                                                        | 1.0718 | 0.0004 |
| 206584_at   | LY96     | lymphocyte antigen 96                                                                                                                                                                                                                                                                                                                                                                                                                                                                                 | 3.2463 | 0.0016 |
| 206589_at   | GFI1     | growth factor independent 1                                                                                                                                                                                                                                                                                                                                                                                                                                                                           | 0.1644 | 0.0471 |
| 206600_s_at | SLC16A5  | solute carrier family 16; member 5 (monocarboxylic acid transporter 6)                                                                                                                                                                                                                                                                                                                                                                                                                                | 0.7198 | 0.0331 |
| 206602_s_at | HOXD3    | homeobox D3                                                                                                                                                                                                                                                                                                                                                                                                                                                                                           | 0.1111 | 0.0427 |
| 206617_s_at | RENBP    | renin binding protein                                                                                                                                                                                                                                                                                                                                                                                                                                                                                 | 1.2306 | 0.0242 |
| 206649_s_at | TFE3     | transcription factor binding to IGHM enhancer 3                                                                                                                                                                                                                                                                                                                                                                                                                                                       | 0.6988 | 0.0441 |
| 206656_s_at | C20orf3  | chromosome 20 open reading frame 3                                                                                                                                                                                                                                                                                                                                                                                                                                                                    | 0.3905 | 0.0469 |
| 206666_at   | GZMK     | granzyme K (granzyme 3; tryptase II)                                                                                                                                                                                                                                                                                                                                                                                                                                                                  | 0.9397 | 0.0203 |
| 206680_at   | CD5L     | CD5 molecule-like                                                                                                                                                                                                                                                                                                                                                                                                                                                                                     | 0.2328 | 0.0165 |
| 206682_at   | CLEC10A  | C-type lectin domain family 10; member A                                                                                                                                                                                                                                                                                                                                                                                                                                                              | 0.7487 | 0.0136 |
| 206715_at   | TFEC     | transcription factor EC                                                                                                                                                                                                                                                                                                                                                                                                                                                                               | 1.1831 | 0.0177 |



|             |           |                                                                                                                                                                                          |        |        |
|-------------|-----------|------------------------------------------------------------------------------------------------------------------------------------------------------------------------------------------|--------|--------|
| 206733_at   | TULP2     | tubby like protein 2                                                                                                                                                                     | 0.1176 | 0.037  |
| 206739_at   | HOXC5     | homeobox C5                                                                                                                                                                              | 0.557  | 0.0251 |
| 206746_at   | BFSP1     | beaded filament structural protein 1; filensin                                                                                                                                           | 0.4949 | 0.0079 |
| 206756_at   | CHST7     | carbohydrate (N-acetylglucosamine 6-O) sulfotransferase 7                                                                                                                                | 0.6464 | 0.025  |
| 206761_at   | CD96      | CD96 molecule                                                                                                                                                                            | 0.4083 | 0.0107 |
| 206783_at   | FGF4      | fibroblast growth factor 4 (heparin secretory transforming protein 1; Kaposi sarcoma oncogene)                                                                                           | 0.1644 | 0.0087 |
| 206785_s_at | KLRC1     | killer cell lectin-like receptor subfamily C; member 1, killer cell lectin-like receptor subfamily C; member 2                                                                           | 0.754  | 0.0021 |
| 206838_at   | TBX19     | T-box 19                                                                                                                                                                                 | 0.3266 | 0.0167 |
| 206842_at   | KCND1     | potassium voltage-gated channel; Shal-related subfamily; member 1                                                                                                                        | 0.2542 | 0.0248 |
| 206850_at   | RASL10A   | RAS-like; family 10; member A                                                                                                                                                            | 0.5259 | 0.007  |
| 206860_s_at | FLJ20323  | hypothetical protein FLJ20323                                                                                                                                                            | 0.8216 | 0.006  |
| 206891_at   | ACTN3     | actinin; alpha 3                                                                                                                                                                         | 0.2111 | 0.0037 |
| 206914_at   | CRTAM     | cytotoxic and regulatory T cell molecule                                                                                                                                                 | 0.2499 | 0.0484 |
| 206923_at   | PRKCA     | protein kinase C; alpha                                                                                                                                                                  | 0.2783 | 0.0268 |
| 206925_at   | ST8SIA4   | ST8 alpha-N-acetyl-neuraminide alpha-2;8-sialyltransferase 4                                                                                                                             | 0.1244 | 0.0484 |
| 206978_at   | CCR2      | chemokine (C-C motif) receptor 2, similar to C-C chemokine receptor type 2 (C-C CKR-2) (CC-CKR-2) (CCR-2) (CCR2) (Monocyte chemoattractant protein 1 receptor) (MCP-1-R) (CD192 antigen) | 0.7384 | 0.0338 |
| 206987_x_at | FGF18     | fibroblast growth factor 18                                                                                                                                                              | 0.181  | 0.0024 |
| 206991_s_at | CCR5      | chemokine (C-C motif) receptor 5                                                                                                                                                         | 0.8697 | 0.0085 |
| 207037_at   | TNFRSF11A | tumor necrosis factor receptor superfamily; member 11a; NFkB activator                                                                                                                   | 0.138  | 0.0076 |
| 207072_at   | IL18RAP   | interleukin 18 receptor accessory protein                                                                                                                                                | 0.3675 | 0.0029 |
| 207075_at   | NLRP3     | NLR family; pyrin domain containing 3                                                                                                                                                    | 0.2761 | 0.0195 |
| 207085_x_at | CSF2RA    | colony stimulating factor 2 receptor; alpha; low-affinity (granulocyte-macrophage)                                                                                                       | 0.3738 | 0.0028 |
| 207098_s_at | MFN1      | mitofusin 1                                                                                                                                                                              | 0.8496 | 0.0295 |
| 207124_s_at | GNB5      | guanine nucleotide binding protein (G protein); beta 5                                                                                                                                   | 1.0329 | 0.0498 |
| 207126_x_at | UGT1A4    | UDP glucuronosyltransferase 1 family; polypeptide A4                                                                                                                                     | 1.7394 | 0.0207 |
| 207138_at   | PHF2      | PHD finger protein 2                                                                                                                                                                     | 0.1207 | 0.0338 |
| 207144_s_at | CITED1    | Cbp/p300-interacting transactivator; with Glu/Asp-rich carboxy-terminal domain; 1                                                                                                        | 0.542  | 0.0176 |
| 207156_at   | HIST1H2AG | histone cluster 1; H2ag                                                                                                                                                                  | 1.2073 | 0.0137 |
| 207206_s_at | ALOX12    | arachidonate 12-lipoxygenase                                                                                                                                                             | 0.1649 | 0.0132 |
| 207222_at   | PLA2G10   | phospholipase A2; group X                                                                                                                                                                | 0.1286 | 0.0291 |
| 207224_s_at | SIGLEC7   | sialic acid binding Ig-like lectin 7                                                                                                                                                     | 0.8302 | 0.0279 |
| 207233_s_at | MITF      | microphthalmia-associated transcription factor                                                                                                                                           | 1.2487 | 0.0208 |
| 207238_s_at | PTPRC     | protein tyrosine phosphatase; receptor type; C                                                                                                                                           | 1.5057 | 0.0024 |
| 207255_at   | LEPR      | leptin receptor                                                                                                                                                                          | 0.1254 | 0.0107 |
| 207277_at   | CD209     | CD209 molecule                                                                                                                                                                           | 0.8101 | 0.0235 |
| 207312_at   | PHKG1     | phosphorylase kinase; gamma 1 (muscle)                                                                                                                                                   | 0.6877 | 0.0424 |
| 207335_x_at | ATP5I     | ATP synthase; H+ transporting; mitochondrial F0 complex; subunit E, major facilitator superfamily domain containing 7                                                                    | 0.4159 | 0.0365 |
| 207338_s_at | ZNF200    | zinc finger protein 200                                                                                                                                                                  | 0.7164 | 0.0161 |
| 207339_s_at | LTB       | lymphotoxin beta (TNF superfamily; member 3)                                                                                                                                             | 0.4527 | 0.0246 |
| 207351_s_at | SH2D2A    | SH2 domain protein 2A                                                                                                                                                                    | 0.2014 | 0.047  |
| 207362_at   | SLC30A4   | solute carrier family 30 (zinc transporter); member 4                                                                                                                                    | 0.2111 | 0.0263 |
| 207375_s_at | IL15RA    | interleukin 15 receptor; alpha                                                                                                                                                           | 1.0639 | 0.0166 |
| 207383_s_at | RHBDL1    | rhomboid; veinlet-like 1 (Drosophila)                                                                                                                                                    | 0.2248 | 0.0371 |
| 207386_at   | CYP7B1    | cytochrome P450; family 7; subfamily B; polypeptide 1                                                                                                                                    | 0.8911 | 0.0408 |
| 207396_s_at | ALG3      | asparagine-linked glycosylation 3 homolog (S. cerevisiae; alpha-1;3-mannosyltransferase)                                                                                                 | 0.4991 | 0.034  |
| 207419_s_at | RAC2      | ras-related C3 botulinum toxin substrate 2 (rho family; small GTP binding protein Rac2)                                                                                                  | 0.5772 | 0.0322 |
| 207438_s_at | SNUPN     | snurportin 1                                                                                                                                                                             | 0.8157 | 0.0005 |

|             |           |                                                                                                                                                                   |        |        |
|-------------|-----------|-------------------------------------------------------------------------------------------------------------------------------------------------------------------|--------|--------|
| 207439_s_at | SLC35A2   | solute carrier family 35 (UDP-galactose transporter); member A2                                                                                                   | 1.058  | 0.0019 |
| 207440_at   | SLC35A2   | solute carrier family 35 (UDP-galactose transporter); member A2                                                                                                   | 0.8071 | 0.0096 |
| 207446_at   | TLR6      | toll-like receptor 6                                                                                                                                              | 0.364  | 0.0122 |
| 207455_at   | P2RY1     | purinergic receptor P2Y; G-protein coupled; 1                                                                                                                     | 0.1805 | 0.0495 |
| 207496_at   | MS4A2     | membrane-spanning 4-domains; subfamily A; member 2 (Fc fragment of IgE; high affinity I; receptor for; beta polypeptide)                                          | 0.1663 | 0.0217 |
| 207540_s_at | SYK       | spleen tyrosine kinase                                                                                                                                            | 0.5486 | 0.0262 |
| 207551_s_at | MSL3L1    | male-specific lethal 3-like 1 (Drosophila)                                                                                                                        | 0.638  | 0.0376 |
| 207610_s_at | EMR2      | egf-like module containing; mucin-like; hormone receptor-like 2                                                                                                   | 0.6336 | 0.0295 |
| 207623_at   | ABCF2     | ATP-binding cassette; sub-family F (GCN20); member 2                                                                                                              | 0.3389 | 0.0001 |
| 207649_at   | KRT37     | keratin 37                                                                                                                                                        | 0.123  | 0.0134 |
| 207658_s_at | FOXP1     | forkhead box G1                                                                                                                                                   | 0.4946 | 0.0475 |
| 207677_s_at | NCF4      | neutrophil cytosolic factor 4; 40kDa                                                                                                                              | 0.6977 | 0.0365 |
| 207681_at   | CXCR3     | chemokine (C-X-C motif) receptor 3                                                                                                                                | 0.2155 | 0.0073 |
| 207695_s_at | IGSF1     | immunoglobulin superfamily; member 1                                                                                                                              | 0.3227 | 0.0063 |
| 207707_s_at | SEC13     | SEC13 homolog (S. cerevisiae)                                                                                                                                     | 0.9122 | 0.0041 |
| 207721_x_at | HINT1     | histidine triad nucleotide binding protein 1                                                                                                                      | 0.3863 | 0.0191 |
| 207723_s_at | KLRC3     | killer cell lectin-like receptor subfamily C; member 3                                                                                                            | 0.1608 | 0.0151 |
| 207735_at   | RNF125    | ring finger protein 125                                                                                                                                           | 0.6015 | 0.0075 |
| 207741_x_at | TPSAB1    | tryptase alpha/beta 1, tryptase beta 2                                                                                                                            | 0.541  | 0.0098 |
| 207765_s_at | KIAA1539  | KIAA1539                                                                                                                                                          | 0.6433 | 0.03   |
| 207795_s_at | KLRD1     | killer cell lectin-like receptor subfamily D; member 1                                                                                                            | 0.3204 | 0.004  |
| 207796_x_at | KLRD1     | killer cell lectin-like receptor subfamily D; member 1                                                                                                            | 0.2857 | 0.0005 |
| 207800_at   | AKAP5     | A kinase (PRKA) anchor protein 5                                                                                                                                  | 0.1374 | 0.0081 |
| 207805_s_at | PSMD9     | proteasome (prosome; macropain) 26S subunit; non-ATPase; 9                                                                                                        | 0.4967 | 0.0287 |
| 207808_s_at | PROS1     | protein S (alpha)                                                                                                                                                 | 1.4655 | 0.0235 |
| 207840_at   | CD160     | CD160 molecule                                                                                                                                                    | 0.272  | 0.0354 |
| 207871_s_at | ST7       | suppression of tumorigenicity 7                                                                                                                                   | 0.8961 | 0.0479 |
| 207880_at   | ADAM11    | ADAM metallopeptidase domain 11                                                                                                                                   | 0.1543 | 0.0285 |
| 207895_at   | NAALADL1  | N-acetylated alpha-linked acidic dipeptidase-like 1                                                                                                               | 0.232  | 0.0205 |
| 207908_at   | KRT2      | keratin 2 (epidermal ichthyosis bullosa of Siemens)                                                                                                               | 0.1428 | 0.023  |
| 207911_s_at | TGM5      | transglutaminase 5                                                                                                                                                | 0.2394 | 0.0261 |
| 207922_s_at | LOC730744 | macrophage erythroblast attacher, similar to macrophage erythroblast attacher                                                                                     | 0.4439 | 0.0273 |
| 207935_s_at | KRT13     | keratin 13                                                                                                                                                        | 0.1407 | 0.0353 |
| 207939_x_at | RNPS1     | RNA binding protein S1; serine-rich domain                                                                                                                        | 0.3514 | 0.0183 |
| 207949_s_at | ICA1      | islet cell autoantigen 1; 69kDa                                                                                                                                   | 0.3033 | 0.0295 |
| 207960_at   |           |                                                                                                                                                                   | 0.141  | 0.0378 |
| 208018_s_at | HCK       | hemopoietic cell kinase                                                                                                                                           | 1.4272 | 0.0101 |
| 208037_s_at | MADCAM1   | mucosal vascular addressin cell adhesion molecule 1                                                                                                               | 0.1495 | 0.0389 |
| 208052_x_at | CEACAM3   | carcinoembryonic antigen-related cell adhesion molecule 3                                                                                                         | 0.2179 | 0.0291 |
| 208062_s_at | NRG2      | neuregulin 2                                                                                                                                                      | 0.263  | 0.0404 |
| 208071_s_at | LAIR1     | leukocyte-associated immunoglobulin-like receptor 1                                                                                                               | 0.3018 | 0.0066 |
| 208091_s_at | ECOP      | EGFR-coamplified and overexpressed protein                                                                                                                        | 0.6255 | 0.0321 |
| 208117_s_at | LAS1L     | LAS1-like (S. cerevisiae)                                                                                                                                         | 1.0141 | 0.0381 |
| 208121_s_at | PTPRO     | protein tyrosine phosphatase; receptor type; O                                                                                                                    | 1.0612 | 0.0369 |
| 208130_s_at | TBXAS1    | thromboxane A synthase 1 (platelet; cytochrome P450; family 5; subfamily A)                                                                                       | 0.6454 | 0.0012 |
| 208146_s_at | CPVL      | carboxypeptidase; vitellogenic-like                                                                                                                               | 1.4288 | 0.0437 |
| 208179_x_at | KIR2DL3   | killer cell immunoglobulin-like receptor; two domains; long cytoplasmic tail; 3, killer cell immunoglobulin-like receptor; two domains; short cytoplasmic tail; 5 | 0.1859 | 0.0251 |
| 208241_at   | NRG1      | neuregulin 1                                                                                                                                                      | 0.3852 | 0.0375 |
| 208306_x_at | HLA-DRB1  | Major histocompatibility complex; class II; DR beta 1                                                                                                             | 1.7299 | 0.0233 |
| 208315_x_at | TRAF3     | TNF receptor-associated factor 3                                                                                                                                  | 0.2693 | 0.0158 |
| 208318_s_at | XYLB      | xylulokinase homolog (H. influenzae)                                                                                                                              | 0.19   | 0.0043 |

|             |          |                                                                                                                                                                                                                                                                                                                                                                                                                                                                                                       |        |        |
|-------------|----------|-------------------------------------------------------------------------------------------------------------------------------------------------------------------------------------------------------------------------------------------------------------------------------------------------------------------------------------------------------------------------------------------------------------------------------------------------------------------------------------------------------|--------|--------|
| 208319_s_at | RBM3     | RNA binding motif (RNP1; RRM) protein 3                                                                                                                                                                                                                                                                                                                                                                                                                                                               | 1.0866 | 0.004  |
| 208335_s_at | DARC     | Duffy blood group; chemokine receptor                                                                                                                                                                                                                                                                                                                                                                                                                                                                 | 1.2653 | 0.0223 |
| 208370_s_at | RCAN1    | regulator of calcineurin 1                                                                                                                                                                                                                                                                                                                                                                                                                                                                            | 0.8663 | 0.043  |
| 208373_s_at | P2RY6    | pyrimidinergic receptor P2Y; G-protein coupled; 6                                                                                                                                                                                                                                                                                                                                                                                                                                                     | 0.369  | 0.004  |
| 208447_s_at | PRPS1    | phosphoribosyl pyrophosphate synthetase 1                                                                                                                                                                                                                                                                                                                                                                                                                                                             | 1.4642 | 0.0217 |
| 208450_at   | LGALS2   | lectin; galactoside-binding; soluble; 2                                                                                                                                                                                                                                                                                                                                                                                                                                                               | 0.4663 | 0.0044 |
| 208473_s_at | GP2      | glycoprotein 2 (zymogen granule membrane)                                                                                                                                                                                                                                                                                                                                                                                                                                                             | 0.1465 | 0.0103 |
| 208486_at   | DRD5     | dopamine receptor D5                                                                                                                                                                                                                                                                                                                                                                                                                                                                                  | 0.1887 | 0.0391 |
| 208509_s_at | OR7A17   | olfactory receptor; family 7; subfamily A; member 17                                                                                                                                                                                                                                                                                                                                                                                                                                                  | 0.1003 | 0.0214 |
| 208594_x_at | LILRA6   | leukocyte immunoglobulin-like receptor; subfamily A (with TM domain); member 6                                                                                                                                                                                                                                                                                                                                                                                                                        | 0.2757 | 0.0016 |
| 208596_s_at | UGT1A1   | UDP glucuronosyltransferase 1 family; polypeptide A1, UDP glucuronosyltransferase 1 family; polypeptide A10, UDP glucuronosyltransferase 1 family; polypeptide A3, UDP glucuronosyltransferase 1 family; polypeptide A4, UDP glucuronosyltransferase 1 family; polypeptide A5, UDP glucuronosyltransferase 1 family; polypeptide A6, UDP glucuronosyltransferase 1 family; polypeptide A7, UDP glucuronosyltransferase 1 family; polypeptide A8, UDP glucuronosyltransferase 1 family; polypeptide A9 | 1.7583 | 0.031  |
| 208598_s_at | HUWE1    | HECT; UBA and WWE domain containing 1                                                                                                                                                                                                                                                                                                                                                                                                                                                                 | 0.5922 | 0.012  |
| 208640_at   | RAC1     | ras-related C3 botulinum toxin substrate 1 (rho family; small GTP binding protein Rac1)                                                                                                                                                                                                                                                                                                                                                                                                               | 0.1431 | 0.0483 |
| 208658_at   | PDIA4    | protein disulfide isomerase family A; member 4                                                                                                                                                                                                                                                                                                                                                                                                                                                        | 0.6297 | 0.0362 |
| 208693_s_at | GARS     | glycyl-tRNA synthetase                                                                                                                                                                                                                                                                                                                                                                                                                                                                                | 0.5734 | 0.0214 |
| 208705_s_at | EIF5     | eukaryotic translation initiation factor 5                                                                                                                                                                                                                                                                                                                                                                                                                                                            | 0.5184 | 0.0242 |
| 208706_s_at | EIF5     | eukaryotic translation initiation factor 5                                                                                                                                                                                                                                                                                                                                                                                                                                                            | 0.6385 | 0.0209 |
| 208708_x_at | EIF5     | eukaryotic translation initiation factor 5                                                                                                                                                                                                                                                                                                                                                                                                                                                            | 1.0299 | 0.0339 |
| 208714_at   | NDUFV1   | NADH dehydrogenase (ubiquinone) flavoprotein 1; 51kDa                                                                                                                                                                                                                                                                                                                                                                                                                                                 | 0.3958 | 0.0379 |
| 208729_x_at | HLA-B    | major histocompatibility complex; class I; B                                                                                                                                                                                                                                                                                                                                                                                                                                                          | 0.9755 | 0.0013 |
| 208736_at   | ARPC3    | actin related protein 2/3 complex; subunit 3; 21kDa                                                                                                                                                                                                                                                                                                                                                                                                                                                   | 0.4002 | 0.0253 |
| 208749_x_at | FLOT1    | flotillin 1                                                                                                                                                                                                                                                                                                                                                                                                                                                                                           | 0.3648 | 0.0449 |
| 208785_s_at | MAP1LC3B | microtubule-associated protein 1 light chain 3 beta                                                                                                                                                                                                                                                                                                                                                                                                                                                   | 0.5995 | 0.0387 |
| 208786_s_at | MAP1LC3B | microtubule-associated protein 1 light chain 3 beta                                                                                                                                                                                                                                                                                                                                                                                                                                                   | 0.5057 | 0.0286 |
| 208787_at   | MRPL3    | mitochondrial ribosomal protein L3                                                                                                                                                                                                                                                                                                                                                                                                                                                                    | 0.4019 | 0.0027 |
| 208812_x_at | HLA-C    | major histocompatibility complex; class I; C, similar to major histocompatibility complex; class I; C                                                                                                                                                                                                                                                                                                                                                                                                 | 0.5207 | 0.0042 |
| 208826_x_at | HINT1    | histidine triad nucleotide binding protein 1                                                                                                                                                                                                                                                                                                                                                                                                                                                          | 0.3682 | 0.0343 |
| 208827_at   | PSMB6    | proteasome (prosome; macropain) subunit; beta type; 6                                                                                                                                                                                                                                                                                                                                                                                                                                                 | 0.4978 | 0.0084 |
| 208837_at   | TMED3    | transmembrane emp24 protein transport domain containing 3                                                                                                                                                                                                                                                                                                                                                                                                                                             | 1.0335 | 0.0097 |
| 208847_s_at | ADH5     | alcohol dehydrogenase 5 (class III); chi polypeptide                                                                                                                                                                                                                                                                                                                                                                                                                                                  | 0.3278 | 0.042  |
| 208848_at   | ADH5     | alcohol dehydrogenase 5 (class III); chi polypeptide                                                                                                                                                                                                                                                                                                                                                                                                                                                  | 0.6258 | 0.0277 |
| 208885_at   | LCP1     | lymphocyte cytosolic protein 1 (L-plastin)                                                                                                                                                                                                                                                                                                                                                                                                                                                            | 1.3823 | 0.0007 |
| 208894_at   | HLA-DRA  | major histocompatibility complex; class II; DR alpha                                                                                                                                                                                                                                                                                                                                                                                                                                                  | 2.4115 | 0.0047 |
| 208898_at   | ATP6V1D  | ATPase; H+ transporting; lysosomal 34kDa; V1 subunit D                                                                                                                                                                                                                                                                                                                                                                                                                                                | 0.6371 | 0.0019 |
| 208899_x_at | ATP6V1D  | ATPase; H+ transporting; lysosomal 34kDa; V1 subunit D                                                                                                                                                                                                                                                                                                                                                                                                                                                | 0.7871 | 0.009  |
| 208909_at   | UQCRC1   | ubiquinol-cytochrome c reductase; Rieske iron-sulfur polypeptide 1                                                                                                                                                                                                                                                                                                                                                                                                                                    | 0.3681 | 0.0415 |
| 208921_s_at | SRI      | sorcini                                                                                                                                                                                                                                                                                                                                                                                                                                                                                               | 0.7858 | 0.0008 |
| 208923_at   | CYFIP1   | cytoplasmic FMR1 interacting protein 1                                                                                                                                                                                                                                                                                                                                                                                                                                                                | 0.5743 | 0.0122 |
| 208968_s_at | CIAPIN1  | cytokine induced apoptosis inhibitor 1                                                                                                                                                                                                                                                                                                                                                                                                                                                                | 0.5331 | 0.0472 |
| 209015_s_at | DNAJB6   | DnaJ (Hsp40) homolog; subfamily B; member 6                                                                                                                                                                                                                                                                                                                                                                                                                                                           | 1.1792 | 0.0088 |
| 209036_s_at | MDH2     | malate dehydrogenase 2; NAD (mitochondrial)                                                                                                                                                                                                                                                                                                                                                                                                                                                           | 0.3835 | 0.0435 |
| 209040_s_at | PSMB8    | proteasome (prosome; macropain) subunit; beta type; 8 (large multifunctional peptidase 7)                                                                                                                                                                                                                                                                                                                                                                                                             | 2.3702 | 0      |
| 209054_s_at | WHSC1    | Wolf-Hirschhorn syndrome candidate 1                                                                                                                                                                                                                                                                                                                                                                                                                                                                  | 0.7066 | 0.0215 |
| 209066_x_at | UQCRCB   | ubiquinol-cytochrome c reductase binding protein                                                                                                                                                                                                                                                                                                                                                                                                                                                      | 0.3039 | 0.0274 |
| 209083_at   | CORO1A   | coronin; actin binding protein; 1A                                                                                                                                                                                                                                                                                                                                                                                                                                                                    | 1.1076 | 0.0185 |

|             |                 |                                                                                                                        |        |        |
|-------------|-----------------|------------------------------------------------------------------------------------------------------------------------|--------|--------|
| 209104_s_at | NOLA2           | nucleolar protein family A; member 2 (H/ACA small nucleolar RNPs)                                                      | 0.5414 | 0.0452 |
| 209132_s_at | COMMD4          | COMM domain containing 4                                                                                               | 1.1283 | 0.0001 |
| 209133_s_at | COMMD4          | COMM domain containing 4                                                                                               | 0.1728 | 0.0238 |
| 209140_x_at | HLA-B           | major histocompatibility complex; class I; B                                                                           | 0.636  | 0.0009 |
| 209171_at   | ITPA            | inosine triphosphatase (nucleoside triphosphate pyrophosphatase)                                                       | 0.6534 | 0.0158 |
| 209211_at   | KLF5            | Kruppel-like factor 5 (intestinal)                                                                                     | 0.571  | 0.0365 |
| 209216_at   | WDR45           | WD repeat domain 45                                                                                                    | 0.7634 | 0.0201 |
| 209217_s_at | WDR45           | WD repeat domain 45                                                                                                    | 0.8322 | 0.0134 |
| 209232_s_at | DCTN5           | dynactin 5 (p25)                                                                                                       | 0.496  | 0.0395 |
| 209239_at   | NFKB1           | nuclear factor of kappa light polypeptide gene enhancer in B-cells 1 (p105)                                            | 1.028  | 0.0045 |
| 209260_at   | SFN             | stratifin                                                                                                              | 0.1637 | 0.032  |
| 209269_s_at | SYK             | spleen tyrosine kinase                                                                                                 | 0.2508 | 0.0101 |
| 209275_s_at | CLN3            | ceroid-lipofuscinosis; neuronal 3; juvenile (Batten; Spielmeyer-Vogt disease)                                          | 0.8282 | 0.0445 |
| 209303_at   | NDUFS4          | NADH dehydrogenase (ubiquinone) Fe-S protein 4; 18kDa (NADH-coenzyme Q reductase)                                      | 0.5802 | 0.0238 |
| 209312_x_at | HLA-DRB1        | hypothetical protein LOC730415, major histocompatibility complex; class II; DR beta 1                                  | 2.0573 | 0.0182 |
| 209326_at   | SLC35A2         | solute carrier family 35 (UDP-galactose transporter); member A2                                                        | 0.9344 | 0.0114 |
| 209331_s_at | MAX             | MYC associated factor X                                                                                                | 0.6699 | 0.0067 |
| 209349_at   | RAD50           | RAD50 homolog (S. cerevisiae)                                                                                          | 0.8683 | 0.0232 |
| 209370_s_at | SH3BP2          | SH3-domain binding protein 2                                                                                           | 0.2576 | 0.0476 |
| 209371_s_at | SH3BP2          | SH3-domain binding protein 2                                                                                           | 0.1998 | 0.0031 |
| 209373_at   | MALL            | mal; T-cell differentiation protein-like                                                                               | 0.8891 | 0.0111 |
| 209374_s_at | IGHM            | immunoglobulin heavy constant mu                                                                                       | 1.7305 | 0.0239 |
| 209394_at   | ASMTL           | acetylserotonin O-methyltransferase-like                                                                               | 0.9162 | 0.0147 |
| 209395_at   | CHI3L1          | chitinase 3-like 1 (cartilage glycoprotein-39)                                                                         | 2.6391 | 0.0036 |
| 209396_s_at | CHI3L1          | chitinase 3-like 1 (cartilage glycoprotein-39)                                                                         | 2.2317 | 0.0039 |
| 209405_s_at | FAM3A           | family with sequence similarity 3; member A                                                                            | 0.7601 | 0.038  |
| 209411_s_at | GGA3            | golgi associated; gamma adaptin ear containing; ARF binding protein 3                                                  | 0.7127 | 0.0471 |
| 209414_at   | FZR1            | fizzy/cell division cycle 20 related 1 (Drosophila)                                                                    | 0.3601 | 0.0318 |
| 209440_at   | PRPS1           | phosphoribosyl pyrophosphate synthetase 1                                                                              | 0.8608 | 0.0118 |
| 209444_at   | RAP1GDS1        | RAP1; GTP-GDP dissociation stimulator 1                                                                                | 0.9004 | 0.0444 |
| 209449_at   | LSM2            | LSM2 homolog; U6 small nuclear RNA associated (S. cerevisiae)                                                          | 0.7509 | 0.022  |
| 209450_at   | OSGEP           | O-sialoglycoprotein endopeptidase                                                                                      | 1.1689 | 0.0009 |
| 209452_s_at | VTI1B           | vesicle transport through interaction with t-SNAREs homolog 1B (yeast)                                                 | 0.5994 | 0.0157 |
| 209479_at   | CCDC28A         | coiled-coil domain containing 28A                                                                                      | 0.4886 | 0.0289 |
| 209482_at   | POP7            | processing of precursor 7; ribonuclease P/MRP subunit (S. cerevisiae)                                                  | 0.5879 | 0.0115 |
| 209492_x_at | ATP5I           | ATP synthase; H+ transporting; mitochondrial F0 complex; subunit E                                                     | 0.3878 | 0.0434 |
| 209493_at   | PDZD2           | PDZ domain containing 2                                                                                                | 0.8186 | 0.0163 |
| 209499_x_at | TNFSF12-TNFSF13 | tumor necrosis factor (ligand) superfamily; member 12-member 13, tumor necrosis factor (ligand) superfamily; member 13 | 0.6104 | 0.045  |
| 209500_x_at | TNFSF12-TNFSF13 | tumor necrosis factor (ligand) superfamily; member 12-member 13, tumor necrosis factor (ligand) superfamily; member 13 | 0.7449 | 0.0446 |
| 209505_at   | NR2F1           | Nuclear receptor subfamily 2; group F; member 1                                                                        | 1.568  | 0.0083 |
| 209506_s_at | NR2F1           | nuclear receptor subfamily 2; group F; member 1                                                                        | 0.9277 | 0.0329 |
| 209514_s_at | RAB27A          | RAB27A; member RAS oncogene family                                                                                     | 1.9823 | 0.0017 |
| 209515_s_at | RAB27A          | RAB27A; member RAS oncogene family                                                                                     | 1.2046 | 0.0342 |
| 209536_s_at | EHD4            | EH-domain containing 4                                                                                                 | 1.137  | 0.0212 |
| 209542_x_at | IGF1            | insulin-like growth factor 1 (somatomedin C)                                                                           | 0.4231 | 0.0412 |
| 209544_at   | RIPK2           | receptor-interacting serine-threonine kinase 2                                                                         | 0.5194 | 0.0016 |

|             |          |                                                                                          |        |        |
|-------------|----------|------------------------------------------------------------------------------------------|--------|--------|
| 209545_s_at | RIPK2    | receptor-interacting serine-threonine kinase 2                                           | 0.9846 | 0.0151 |
| 209563_x_at | CALM1    | calmodulin 1 (phosphorylase kinase; delta)                                               | 0.4231 | 0.0089 |
| 209565_at   | RNF113A  | ring finger protein 113A                                                                 | 0.7421 | 0.0407 |
| 209580_s_at | MBD4     | methyl-CpG binding domain protein 4                                                      | 0.6529 | 0.0027 |
| 209619_at   | CD74     | CD74 molecule; major histocompatibility complex; class II invariant chain                | 1.5719 | 0.0216 |
| 209620_s_at | ABCB7    | ATP-binding cassette; sub-family B (MDR/TAP); member 7                                   | 0.6554 | 0.0423 |
| 209626_s_at | OSBPL3   | oxysterol binding protein-like 3                                                         | 0.9632 | 0.0052 |
| 209627_s_at | OSBPL3   | oxysterol binding protein-like 3                                                         | 1.2043 | 0.0176 |
| 209633_at   | PPP2R3A  | protein phosphatase 2 (formerly 2A); regulatory subunit B"; alpha                        | 0.9108 | 0.0228 |
| 209654_at   | KIAA0947 | KIAA0947 protein                                                                         | 0.8507 | 0.0115 |
| 209665_at   | CYB561D2 | cytochrome b-561 domain containing 2                                                     | 0.8429 | 0.0073 |
| 209670_at   | TRAC     | T cell receptor alpha constant                                                           | 0.8304 | 0.0312 |
| 209671_x_at | TRA@     | T cell receptor alpha constant, T cell receptor alpha locus                              | 0.7577 | 0.0072 |
| 209690_s_at | DOK4     | docking protein 4                                                                        | 0.216  | 0.0247 |
| 209696_at   | FBP1     | fructose-1,6-bisphosphatase 1                                                            | 1.1522 | 0.0042 |
| 209734_at   | NCKAP1L  | NCK-associated protein 1-like                                                            | 0.9672 | 0.0076 |
| 209759_s_at | DCI      | dodecenoyl-Coenzyme A delta isomerase (3;2 trans-enoyl-Coenzyme A isomerase)             | 0.6047 | 0.0274 |
| 209762_x_at | SP110    | SP110 nuclear body protein                                                               | 0.9307 | 0.0458 |
| 209790_s_at | CASP6    | caspase 6; apoptosis-related cysteine peptidase                                          | 1.262  | 0.0009 |
| 209823_x_at | HLA-DQB1 | major histocompatibility complex; class II; DQ beta 1                                    | 2.3978 | 0.0105 |
| 209827_s_at | IL16     | interleukin 16 (lymphocyte chemoattractant factor)                                       | 0.5569 | 0.0055 |
| 209828_s_at | IL16     | interleukin 16 (lymphocyte chemoattractant factor)                                       | 0.1993 | 0.0337 |
| 209831_x_at | DNASE2   | deoxyribonuclease II; lysosomal                                                          | 0.6358 | 0.0229 |
| 209836_x_at | BOLA2    | bolA homolog 2 (E. coli), bolA homolog 2B (E. coli)                                      | 0.6347 | 0.0147 |
| 209877_at   | SNCG     | synuclein; gamma (breast cancer-specific protein 1)                                      | 2.2257 | 0.0232 |
| 209879_at   | SELPLG   | selectin P ligand                                                                        | 1.3316 | 0.0055 |
| 209901_x_at | AIF1     | allograft inflammatory factor 1                                                          | 2.1457 | 0.0017 |
| 209906_at   | C3AR1    | complement component 3a receptor 1                                                       | 1.3567 | 0.0329 |
| 209929_s_at | IKBKG    | inhibitor of kappa light polypeptide gene enhancer in B-cells; kinase gamma              | 0.7127 | 0.0141 |
| 209943_at   | FBXL4    | F-box and leucine-rich repeat protein 4                                                  | 0.6841 | 0.0211 |
| 209960_at   | HGF      | hepatocyte growth factor (hepapoietin A; scatter factor)                                 | 1.3314 | 0.0355 |
| 209970_x_at | CASP1    | caspase 1; apoptosis-related cysteine peptidase (interleukin 1; beta; convertase)        | 1.4525 | 0.0274 |
| 209995_s_at | TCL1A    | T-cell leukemia/lymphoma 1A                                                              | 0.1909 | 0.0049 |
| 210016_at   | MYT1L    | myelin transcription factor 1-like                                                       | 0.1018 | 0.0448 |
| 210024_s_at | UBE2E3   | ubiquitin-conjugating enzyme E2E 3 (UBC4/5 homolog; yeast)                               | 0.3869 | 0.0405 |
| 210031_at   | CD247    | CD247 molecule                                                                           | 0.4114 | 0.0187 |
| 210045_at   | IDH2     | isocitrate dehydrogenase 2 (NADP+); mitochondrial                                        | 0.7618 | 0.0332 |
| 210046_s_at | IDH2     | isocitrate dehydrogenase 2 (NADP+); mitochondrial                                        | 1.4871 | 0.0241 |
| 210051_at   | RAPGEF3  | Rap guanine nucleotide exchange factor (GEF) 3                                           | 0.3761 | 0.0179 |
| 210061_at   | ZNF589   | zinc finger protein 589                                                                  | 0.2968 | 0.0315 |
| 210062_s_at | ZNF589   | zinc finger protein 589                                                                  | 0.625  | 0.0033 |
| 210072_at   | CCL19    | chemokine (C-C motif) ligand 19                                                          | 1.3382 | 0.035  |
| 210075_at   | 2-Mar    | membrane-associated ring finger (C3HC4) 2                                                | 0.8782 | 0.0043 |
| 210112_at   | HPS1     | Hermansky-Pudlak syndrome 1                                                              | 0.4608 | 0.0179 |
| 210116_at   | SH2D1A   | SH2 domain protein 1A; Duncan's disease (lymphoproliferative syndrome)                   | 0.2776 | 0.0217 |
| 210127_at   | RAB6B    | RAB6B; member RAS oncogene family                                                        | 0.4498 | 0.0449 |
| 210140_at   | CST7     | cystatin F (leukocystatin)                                                               | 0.6115 | 0.0083 |
| 210145_at   | PLA2G4A  | phospholipase A2; group IVA (cytosolic; calcium-dependent)                               | 0.7849 | 0.0385 |
| 210146_x_at | LILRB2   | leukocyte immunoglobulin-like receptor; subfamily B (with TM and ITIM domains); member 2 | 0.9204 | 0.0367 |
| 210150_s_at | LAMA5    | laminin; alpha 5                                                                         | 1.1181 | 0.0078 |

|             |                 |                                                                                                                        |        |        |
|-------------|-----------------|------------------------------------------------------------------------------------------------------------------------|--------|--------|
| 210152_at   | LILRB4          | leukocyte immunoglobulin-like receptor; subfamily B (with TM and ITIM domains); member 4                               | 0.5955 | 0.0125 |
| 210162_s_at | NFATC1          | nuclear factor of activated T-cells; cytoplasmic; calcineurin-dependent 1                                              | 0.2767 | 0.0134 |
| 210163_at   | CXCL11          | chemokine (C-X-C motif) ligand 11                                                                                      | 0.3694 | 0.0211 |
| 210164_at   | GZMB            | granzyme B (granzyme 2; cytotoxic T-lymphocyte-associated serine esterase 1)                                           | 1.6923 | 0.0112 |
| 210166_at   | TLR5            | toll-like receptor 5                                                                                                   | 0.832  | 0.0155 |
| 210174_at   | NR5A2           | nuclear receptor subfamily 5; group A; member 2                                                                        | 1.1292 | 0.0482 |
| 210176_at   | TLR1            | toll-like receptor 1                                                                                                   | 1.0216 | 0.0117 |
| 210184_at   | ITGAX           | integrin; alpha X (complement component 3 receptor 4 subunit)                                                          | 0.6965 | 0.0421 |
| 210212_x_at | MTCP1           | mature T-cell proliferation 1                                                                                          | 0.7768 | 0.0382 |
| 210222_s_at | RTN1            | reticulon 1                                                                                                            | 0.6621 | 0.032  |
| 210223_s_at | MR1             | major histocompatibility complex; class I-related                                                                      | 1.0794 | 0.0289 |
| 210224_at   | MR1             | major histocompatibility complex; class I-related                                                                      | 0.5579 | 0.0243 |
| 210242_x_at | ST20            | suppressor of tumorigenicity 20                                                                                        | 0.351  | 0.0294 |
| 210255_at   | RAD51L1         | RAD51-like 1 ( <i>S. cerevisiae</i> )                                                                                  | 0.2491 | 0.0013 |
| 210260_s_at | TNFAIP8         | tumor necrosis factor; alpha-induced protein 8                                                                         | 1.4824 | 0.0429 |
| 210279_at   | GPR18           | G protein-coupled receptor 18                                                                                          | 0.2914 | 0.0378 |
| 210288_at   | KLRG1           | killer cell lectin-like receptor subfamily G; member 1                                                                 | 0.2541 | 0.0026 |
| 210292_s_at | PCDH11X         | protocadherin 11 X-linked, protocadherin 11 Y-linked                                                                   | 0.1059 | 0.0435 |
| 210305_at   | PDE4DIP         | phosphodiesterase 4D interacting protein (myomegalin)                                                                  | 0.2294 | 0.0315 |
| 210314_x_at | TNFSF12-TNFSF13 | tumor necrosis factor (ligand) superfamily; member 12-member 13, tumor necrosis factor (ligand) superfamily; member 13 | 1.1857 | 0.0261 |
| 210315_at   | SYN2            | synapsin II                                                                                                            | 0.7366 | 0.0153 |
| 210319_x_at | MSX2            | msh homeobox 2                                                                                                         | 0.5676 | 0.0135 |
| 210340_s_at | CSF2RA          | colony stimulating factor 2 receptor; alpha; low-affinity (granulocyte-macrophage)                                     | 0.1855 | 0.0474 |
| 210345_s_at | DNAH9           | dynein; axonemal; heavy chain 9                                                                                        | 0.1173 | 0.0471 |
| 210354_at   | IFNG            | interferon; gamma                                                                                                      | 0.2213 | 0.0258 |
| 210356_x_at | MS4A1           | membrane-spanning 4-domains; subfamily A; member 1                                                                     | 0.1445 | 0.0069 |
| 210367_s_at | PTGES           | prostaglandin E synthase                                                                                               | 0.8518 | 0.0323 |
| 210385_s_at | ARTS-1          | type 1 tumor necrosis factor receptor shedding aminopeptidase regulator                                                | 1.0249 | 0.0096 |
| 210447_at   | GLUD2           | glutamate dehydrogenase 2                                                                                              | 1.161  | 0.0027 |
| 210450_at   | LOC90925        | hypothetical protein LOC90925                                                                                          | 0.2231 | 0.0195 |
| 210476_s_at | PRLR            | prolactin receptor                                                                                                     | 0.8465 | 0.0346 |
| 210482_x_at | MAP2K5          | mitogen-activated protein kinase kinase 5                                                                              | 0.6113 | 0.0208 |
| 210514_x_at | HLA-G           | HLA-G histocompatibility antigen; class I; G                                                                           | 0.5563 | 0.0118 |
| 210532_s_at | C14orf2         | chromosome 14 open reading frame 2                                                                                     | 0.376  | 0.0048 |
| 210533_at   | MSH4            | mutS homolog 4 ( <i>E. coli</i> )                                                                                      | 0.2788 | 0.03   |
| 210542_s_at | SLCO3A1         | solute carrier organic anion transporter family; member 3A1                                                            | 0.6618 | 0.0048 |
| 210548_at   | CCL23           | chemokine (C-C motif) ligand 23                                                                                        | 0.1797 | 0.0122 |
| 210551_s_at | ASMT            | acetylserotonin O-methyltransferase                                                                                    | 0.3344 | 0.0284 |
| 210569_s_at | SIGLEC9         | sialic acid binding Ig-like lectin 9                                                                                   | 0.2255 | 0.0246 |
| 210570_x_at | MAPK9           | mitogen-activated protein kinase 9                                                                                     | 1.1159 | 0.0267 |
| 210572_at   | PCDHA2          | protocadherin alpha 2                                                                                                  | 0.4031 | 0.013  |
| 210582_s_at | LIMK2           | LIM domain kinase 2                                                                                                    | 0.3983 | 0.0162 |
| 210584_s_at | CTA-126B4.3     | CGI-96 protein, polymerase (DNA-directed); delta interacting protein 3, similar to CGI-96                              | 0.2053 | 0.0062 |
| 210606_x_at | KLRD1           | killer cell lectin-like receptor subfamily D; member 1                                                                 | 0.3685 | 0.0013 |
| 210621_s_at | RASA1           | RAS p21 protein activator (GTPase activating protein) 1                                                                | 1.0645 | 0.0127 |
| 210629_x_at | LST1            | leukocyte specific transcript 1                                                                                        | 0.8234 | 0.0108 |
| 210644_s_at | LAIR1           | leukocyte-associated immunoglobulin-like receptor 1                                                                    | 1.3066 | 0.0202 |

|             |          |                                                                                                                                                                                                                                                                                                                                                                                       |        |        |
|-------------|----------|---------------------------------------------------------------------------------------------------------------------------------------------------------------------------------------------------------------------------------------------------------------------------------------------------------------------------------------------------------------------------------------|--------|--------|
| 210674_s_at | PCDHA1   | protocadherin alpha 1, protocadherin alpha 10, protocadherin alpha 11, protocadherin alpha 12, protocadherin alpha 13, protocadherin alpha 2, protocadherin alpha 3, protocadherin alpha 4, protocadherin alpha 5, protocadherin alpha 6, protocadherin alpha 7, protocadherin alpha 8, protocadherin alpha 9, protocadherin alpha subfamily C; 1, protocadherin alpha subfamily C; 2 | 2.2042 | 0.0477 |
| 210745_at   | ONECUT1  | one cut homeobox 1                                                                                                                                                                                                                                                                                                                                                                    | 0.1198 | 0.0346 |
| 210753_s_at | EPHB1    | EPH receptor B1                                                                                                                                                                                                                                                                                                                                                                       | 1.2721 | 0.029  |
| 210754_s_at | LYN      | v-yes-1 Yamaguchi sarcoma viral related oncogene homolog                                                                                                                                                                                                                                                                                                                              | 1.4789 | 0.0014 |
| 210802_s_at | DIMT1L   | DIM1 dimethyladenosine transferase 1-like (S. cerevisiae)                                                                                                                                                                                                                                                                                                                             | 0.9441 | 0.0468 |
| 210813_s_at | XRCC4    | X-ray repair complementing defective repair in Chinese hamster cells 4                                                                                                                                                                                                                                                                                                                | 0.5957 | 0.0173 |
| 210819_x_at | DIO2     | deiodinase; iodothyronine; type II                                                                                                                                                                                                                                                                                                                                                    | 0.1472 | 0.0203 |
| 210849_s_at | VPS41    | vacuolar protein sorting 41 homolog (S. cerevisiae)                                                                                                                                                                                                                                                                                                                                   | 0.6304 | 0.0136 |
| 210859_x_at | CLN3     | ceroid-lipofuscinosis; neuronal 3; juvenile (Batten; Spielmeyer-Vogt disease)                                                                                                                                                                                                                                                                                                         | 0.7425 | 0.0462 |
| 210871_x_at | SSX2IP   | synovial sarcoma; X breakpoint 2 interacting protein                                                                                                                                                                                                                                                                                                                                  | 0.4911 | 0.039  |
| 210873_x_at | APOBEC3A | apolipoprotein B mRNA editing enzyme; catalytic polypeptide-like 3A                                                                                                                                                                                                                                                                                                                   | 0.6493 | 0.0171 |
| 210889_s_at | FCGR2B   | Fc fragment of IgG; low affinity IIb; receptor (CD32), Fc fragment of IgG; low affinity IIc; receptor for (CD32)                                                                                                                                                                                                                                                                      | 1.1143 | 0.0233 |
| 210895_s_at | CD86     | CD86 molecule                                                                                                                                                                                                                                                                                                                                                                         | 1.4034 | 0.0064 |
| 210907_s_at | PDCD10   | programmed cell death 10                                                                                                                                                                                                                                                                                                                                                              | 0.5828 | 0.0269 |
| 210915_x_at | TRBC1    | T cell receptor beta constant 1, T cell receptor beta variable 19                                                                                                                                                                                                                                                                                                                     | 1.6805 | 0.0074 |
| 210926_at   | FKSG30   | kappa-actin                                                                                                                                                                                                                                                                                                                                                                           | 0.3866 | 0.0062 |
| 210951_x_at | RAB27A   | RAB27A; member RAS oncogene family                                                                                                                                                                                                                                                                                                                                                    | 1.9367 | 0.0026 |
| 210959_s_at | SRD5A1   | steroid-5-alpha-reductase; alpha polypeptide 1 (3-oxo-5 alpha-steroid delta 4-dehydrogenase alpha 1)                                                                                                                                                                                                                                                                                  | 1.2598 | 0.0141 |
| 210972_x_at | TRA@     | T cell receptor alpha constant, T cell receptor alpha joining 17, T cell receptor alpha locus, T cell receptor alpha variable 20, T cell receptor delta variable 2                                                                                                                                                                                                                    | 0.583  | 0.0424 |
| 210982_s_at | HLA-DRA  | major histocompatibility complex; class II; DR alpha                                                                                                                                                                                                                                                                                                                                  | 2.5873 | 0.0088 |
| 210992_x_at | FCGR2C   | Fc fragment of IgG; low affinity IIc; receptor for (CD32)                                                                                                                                                                                                                                                                                                                             | 0.467  | 0.0215 |
| 210993_s_at | SMAD1    | SMAD family member 1                                                                                                                                                                                                                                                                                                                                                                  | 1.0793 | 0.0091 |
| 210997_at   | HGF      | hepatocyte growth factor (hepapoietin A; scatter factor)                                                                                                                                                                                                                                                                                                                              | 1.5371 | 0.0336 |
| 211005_at   | LAT      | linker for activation of T cells                                                                                                                                                                                                                                                                                                                                                      | 0.4912 | 0.0022 |
| 211029_x_at | FGF18    | fibroblast growth factor 18                                                                                                                                                                                                                                                                                                                                                           | 0.2316 | 0.0017 |
| 211071_s_at | MLLT11   | myeloid/lymphoid or mixed-lineage leukemia (trithorax homolog; Drosophila); translocated to; 11                                                                                                                                                                                                                                                                                       | 1.9906 | 0.031  |
| 211138_s_at | KMO      | kynurenine 3-monooxygenase (kynurenine 3-hydroxylase)                                                                                                                                                                                                                                                                                                                                 | 0.6321 | 0.0104 |
| 211144_x_at | TARP     | T cell receptor gamma constant 2, T cell receptor gamma variable 9, TCR gamma alternate reading frame protein                                                                                                                                                                                                                                                                         | 0.3621 | 0.0118 |
| 211153_s_at | TNFSF11  | tumor necrosis factor (ligand) superfamily; member 11                                                                                                                                                                                                                                                                                                                                 | 0.1616 | 0.0085 |
| 211192_s_at | CD84     | CD84 molecule                                                                                                                                                                                                                                                                                                                                                                         | 0.2715 | 0.0061 |
| 211241_at   | ANXA2P3  | annexin A2 pseudogene 3                                                                                                                                                                                                                                                                                                                                                               | 0.2788 | 0.0422 |
| 211250_s_at | SH3BP2   | SH3-domain binding protein 2                                                                                                                                                                                                                                                                                                                                                          | 0.3519 | 0.0023 |
| 211267_at   | HESX1    | HESX homeobox 1                                                                                                                                                                                                                                                                                                                                                                       | 0.239  | 0.0466 |
| 211284_s_at | GRN      | granulin                                                                                                                                                                                                                                                                                                                                                                              | 0.981  | 0.0174 |
| 211286_x_at | CSF2RA   | colony stimulating factor 2 receptor; alpha; low-affinity (granulocyte-macrophage)                                                                                                                                                                                                                                                                                                    | 0.3783 | 0.015  |
| 211287_x_at | CSF2RA   | colony stimulating factor 2 receptor; alpha; low-affinity (granulocyte-macrophage)                                                                                                                                                                                                                                                                                                    | 0.1492 | 0.0478 |
| 211327_x_at | HFE      | hemochromatosis                                                                                                                                                                                                                                                                                                                                                                       | 0.2668 | 0.0071 |
| 211328_x_at | HFE      | hemochromatosis                                                                                                                                                                                                                                                                                                                                                                       | 0.2288 | 0.0125 |
| 211329_x_at | HFE      | hemochromatosis                                                                                                                                                                                                                                                                                                                                                                       | 0.3876 | 0.0005 |
| 211331_x_at | HFE      | hemochromatosis                                                                                                                                                                                                                                                                                                                                                                       | 0.2161 | 0.0113 |

|             |          |                                                                                                                                                                                                                                                              |        |        |
|-------------|----------|--------------------------------------------------------------------------------------------------------------------------------------------------------------------------------------------------------------------------------------------------------------|--------|--------|
| 211333_s_at | FASLG    | Fas ligand (TNF superfamily; member 6)                                                                                                                                                                                                                       | 0.1176 | 0.0198 |
| 211339_s_at | ITK      | IL2-inducible T-cell kinase                                                                                                                                                                                                                                  | 0.5755 | 0.015  |
| 211366_x_at | CASP1    | caspase 1; apoptosis-related cysteine peptidase (interleukin 1; beta; convertase)                                                                                                                                                                            | 1.3572 | 0.0178 |
| 211367_s_at | CASP1    | caspase 1; apoptosis-related cysteine peptidase (interleukin 1; beta; convertase)                                                                                                                                                                            | 1.1344 | 0.0078 |
| 211368_s_at | CASP1    | caspase 1; apoptosis-related cysteine peptidase (interleukin 1; beta; convertase)                                                                                                                                                                            | 1.564  | 0.0123 |
| 211370_s_at | MAP2K5   | mitogen-activated protein kinase kinase 5                                                                                                                                                                                                                    | 0.7508 | 0.0341 |
| 211382_s_at | TACC2    | transforming; acidic coiled-coil containing protein 2                                                                                                                                                                                                        | 0.7156 | 0.0486 |
| 211392_s_at | PATZ1    | POZ (BTB) and AT hook containing zinc finger 1                                                                                                                                                                                                               | 0.2443 | 0.0422 |
| 211395_x_at | FCGR2C   | Fc fragment of IgG; low affinity IIc; receptor for (CD32)                                                                                                                                                                                                    | 0.6456 | 0.0376 |
| 211417_x_at | GGT1     | gamma-glutamyltransferase 1                                                                                                                                                                                                                                  | 0.2645 | 0.035  |
| 211429_s_at | SERPINA1 | serpin peptidase inhibitor; clade A (alpha-1 antiproteinase; antitrypsin); member 1                                                                                                                                                                          | 1.8118 | 0.0038 |
| 211430_s_at | IGH@     | immunoglobulin heavy constant gamma 1 (G1m marker), immunoglobulin heavy constant gamma 2 (G2m marker), immunoglobulin heavy constant gamma 3 (G3m marker), immunoglobulin heavy constant mu, immunoglobulin heavy locus, immunoglobulin heavy variable 4-31 | 2.327  | 0.0228 |
| 211447_s_at | PDE4A    | phosphodiesterase 4A; cAMP-specific (phosphodiesterase E2 dunce homolog; Drosophila)                                                                                                                                                                         | 0.3531 | 0.0099 |
| 211475_s_at | BAG1     | BCL2-associated athanogene                                                                                                                                                                                                                                   | 0.784  | 0.0254 |
| 211485_s_at | FGF18    | fibroblast growth factor 18                                                                                                                                                                                                                                  | 0.1374 | 0.0417 |
| 211502_s_at | PFTK1    | PFTAIRE protein kinase 1                                                                                                                                                                                                                                     | 0.2434 | 0.0066 |
| 211528_x_at | HLA-G    | HLA-G histocompatibility antigen; class I; G                                                                                                                                                                                                                 | 0.5917 | 0.0065 |
| 211529_x_at | HLA-G    | HLA-G histocompatibility antigen; class I; G                                                                                                                                                                                                                 | 0.7323 | 0.004  |
| 211530_x_at | HLA-G    | HLA-G histocompatibility antigen; class I; G                                                                                                                                                                                                                 | 0.4323 | 0.0096 |
| 211557_x_at | SLCO2B1  | solute carrier organic anion transporter family; member 2B1                                                                                                                                                                                                  | 0.508  | 0.0043 |
| 211581_x_at | LST1     | leukocyte specific transcript 1                                                                                                                                                                                                                              | 0.8982 | 0.0197 |
| 211582_x_at | LST1     | leukocyte specific transcript 1                                                                                                                                                                                                                              | 1.0899 | 0.0092 |
| 211596_s_at | LRIG1    | leucine-rich repeats and immunoglobulin-like domains 1                                                                                                                                                                                                       | 1.0119 | 0.0082 |
| 211599_x_at | MET      | met proto-oncogene (hepatocyte growth factor receptor)                                                                                                                                                                                                       | 0.6598 | 0.0044 |
| 211644_x_at | GJB6     | gap junction protein; beta 6, immunoglobulin kappa constant, netrin 2-like (chicken)                                                                                                                                                                         | 1.3891 | 0.0461 |
| 211645_x_at |          | Immunoglobulin kappa light chain (IGKV) mRNA variable region; joining region; and constant region                                                                                                                                                            | 1.1898 | 0.0397 |
| 211656_x_at | HLA-DQB1 | major histocompatibility complex; class II; DQ beta 1                                                                                                                                                                                                        | 1.6926 | 0.0335 |
| 211661_x_at | PTAFR    | platelet-activating factor receptor                                                                                                                                                                                                                          | 0.5216 | 0.0008 |
| 211663_x_at | PTGDS    | prostaglandin D2 synthase 21kDa (brain)                                                                                                                                                                                                                      | 0.4542 | 0.0479 |
| 211668_s_at | PLAU     | plasminogen activator; urokinase                                                                                                                                                                                                                             | 0.4119 | 0.0404 |
| 211704_s_at | SPIN2A   | spindlin family; member 2A, spindlin family; member 2B                                                                                                                                                                                                       | 0.9888 | 0.003  |
| 211724_x_at | FLJ20323 | hypothetical protein FLJ20323                                                                                                                                                                                                                                | 0.7914 | 0.0064 |
| 211741_x_at | PSG3     | pregnancy specific beta-1-glycoprotein 3                                                                                                                                                                                                                     | 0.2094 | 0.0362 |
| 211742_s_at | EVI2B    | ecotropic viral integration site 2B                                                                                                                                                                                                                          | 1.6954 | 0.001  |
| 211744_s_at | CD58     | CD58 molecule                                                                                                                                                                                                                                                | 1.5515 | 0.0196 |
| 211748_x_at | PTGDS    | prostaglandin D2 synthase 21kDa (brain)                                                                                                                                                                                                                      | 1.242  | 0.0313 |
| 211752_s_at | NDUFS7   | NADH dehydrogenase (ubiquinone) Fe-S protein 7; 20kDa (NADH-coenzyme Q reductase)                                                                                                                                                                            | 0.7824 | 0.0292 |
| 211794_at   | FYB      | FYN binding protein (FYB-120/130)                                                                                                                                                                                                                            | 0.6215 | 0.0025 |
| 211795_s_at | FYB      | FYN binding protein (FYB-120/130)                                                                                                                                                                                                                            | 1.0944 | 0.0079 |
| 211796_s_at | TRBC1    | T cell receptor beta constant 1, T cell receptor beta variable 19, T cell receptor beta variable 3-1, T cell receptor beta variable 5-4, T cell receptor beta variable 7-2                                                                                   | 1.5371 | 0.0103 |
| 211799_x_at | HLA-C    | major histocompatibility complex; class I; C                                                                                                                                                                                                                 | 1.2623 | 0.0013 |
| 211815_s_at | GGA3     | golgi associated; gamma adaptin ear containing; ARF binding protein 3                                                                                                                                                                                        | 0.2011 | 0.0204 |
| 211855_s_at | SLC25A14 | solute carrier family 25 (mitochondrial carrier; brain); member 14                                                                                                                                                                                           | 1.1642 | 0.0022 |
| 211863_x_at | HFE      | hemochromatosis                                                                                                                                                                                                                                              | 0.1934 | 0.0399 |



|             |           |                                                                                                                                                                                                                           |        |        |
|-------------|-----------|---------------------------------------------------------------------------------------------------------------------------------------------------------------------------------------------------------------------------|--------|--------|
| 211864_s_at | FER1L3    | fer-1-like 3; myoferlin ( <i>C. elegans</i> )                                                                                                                                                                             | 1.5669 | 0.0207 |
| 211870_s_at | PCDHA3    | protocadherin alpha 3                                                                                                                                                                                                     | 0.3365 | 0.0139 |
| 211871_x_at | GNB5      | guanine nucleotide binding protein (G protein); beta 5                                                                                                                                                                    | 0.4263 | 0.025  |
| 211876_x_at | PCDHGA10  | protocadherin gamma subfamily A; 10, protocadherin gamma subfamily A; 11, protocadherin gamma subfamily A; 12, protocadherin gamma subfamily A; 3, protocadherin gamma subfamily A; 5, protocadherin gamma subfamily A; 6 | 0.8688 | 0.0094 |
| 211880_x_at | PCDHGA1   | protocadherin gamma subfamily A; 1                                                                                                                                                                                        | 0.3088 | 0.0309 |
| 211881_x_at | IGLJ3     | immunoglobulin lambda joining 3                                                                                                                                                                                           | 0.6761 | 0.0471 |
| 211887_x_at | MSR1      | macrophage scavenger receptor 1                                                                                                                                                                                           | 0.18   | 0.0301 |
| 211888_x_at | CASP10    | caspase 10; apoptosis-related cysteine peptidase                                                                                                                                                                          | 0.1937 | 0.039  |
| 211898_s_at | EPHB1     | EPH receptor B1                                                                                                                                                                                                           | 0.5804 | 0.0069 |
| 211902_x_at | TRA@      | T cell receptor alpha locus                                                                                                                                                                                               | 0.4332 | 0.0261 |
| 211911_x_at | HLA-B     | major histocompatibility complex; class I; B                                                                                                                                                                              | 0.9341 | 0.0032 |
| 211917_s_at | PRLR      | prolactin receptor                                                                                                                                                                                                        | 1.3384 | 0.0406 |
| 211960_s_at | RAB7A     | RAB7A; member RAS oncogene family                                                                                                                                                                                         | 0.5109 | 0.042  |
| 211984_at   | CALM1     | calmodulin 1 (phosphorylase kinase; delta)                                                                                                                                                                                | 0.7241 | 0.0074 |
| 211985_s_at | CALM1     | calmodulin 1 (phosphorylase kinase; delta)                                                                                                                                                                                | 0.8223 | 0.0372 |
| 211990_at   | HLA-DPA1  | major histocompatibility complex; class II; DP alpha 1                                                                                                                                                                    | 1.3451 | 0.0307 |
| 211991_s_at | HLA-DPA1  | major histocompatibility complex; class II; DP alpha 1                                                                                                                                                                    | 2.4281 | 0.0075 |
| 212010_s_at | CDV3      | CDV3 homolog (mouse)                                                                                                                                                                                                      | 0.2407 | 0.0396 |
| 212018_s_at | RSL1D1    | ribosomal L1 domain containing 1                                                                                                                                                                                          | 0.5549 | 0.0246 |
| 212129_at   | NIPA2     | non imprinted in Prader-Willi/Angelman syndrome 2                                                                                                                                                                         | 0.5583 | 0.0155 |
| 212133_at   | NIPA2     | Non imprinted in Prader-Willi/Angelman syndrome 2                                                                                                                                                                         | 0.7981 | 0.0363 |
| 212156_at   | VPS39     | vacuolar protein sorting 39 homolog ( <i>S. cerevisiae</i> )                                                                                                                                                              | 0.6451 | 0.016  |
| 212187_x_at | PTGDS     | prostaglandin D2 synthase 21kDa (brain)                                                                                                                                                                                   | 1.1648 | 0.0473 |
| 212223_at   | IDS       | iduronate 2-sulfatase (Hunter syndrome)                                                                                                                                                                                   | 1.0316 | 0.0329 |
| 212243_at   | Gcom1     | GRINL1A combined protein, glutamate receptor; ionotropic; N-methyl D-aspartate-like 1A                                                                                                                                    | 0.5601 | 0.012  |
| 212244_at   | Gcom1     | GRINL1A combined protein, glutamate receptor; ionotropic; N-methyl D-aspartate-like 1A                                                                                                                                    | 0.3962 | 0.0418 |
| 212308_at   | CLASP2    | cytoplasmic linker associated protein 2                                                                                                                                                                                   | 0.7305 | 0.0186 |
| 212311_at   | KIAA0746  | KIAA0746 protein                                                                                                                                                                                                          | 2.3481 | 0.0014 |
| 212314_at   | KIAA0746  | KIAA0746 protein                                                                                                                                                                                                          | 2.8414 | 0.0109 |
| 212317_at   | TNPO3     | transportin 3                                                                                                                                                                                                             | 0.4986 | 0.0234 |
| 212340_at   | YIPF6     | Yip1 domain family; member 6                                                                                                                                                                                              | 1.1926 | 0.0061 |
| 212341_at   | YIPF6     | Yip1 domain family; member 6                                                                                                                                                                                              | 0.669  | 0.0223 |
| 212342_at   | YIPF6     | Yip1 domain family; member 6                                                                                                                                                                                              | 1.2047 | 0.0037 |
| 212343_at   | YIPF6     | Yip1 domain family; member 6                                                                                                                                                                                              | 0.9845 | 0.0292 |
| 212347_x_at | MXD4      | MAX dimerization protein 4                                                                                                                                                                                                | 1.0666 | 0.0224 |
| 212373_at   | FEM1B     | fem-1 homolog b ( <i>C. elegans</i> )                                                                                                                                                                                     | 0.7304 | 0.0457 |
| 212390_at   | LOC727893 | phosphodiesterase 4D interacting protein (myomegalin), similar to phosphodiesterase 4D interacting protein isoform 1                                                                                                      | 0.5272 | 0.0093 |
| 212405_s_at | KIAA0859  | KIAA0859                                                                                                                                                                                                                  | 0.7623 | 0.0113 |
| 212407_at   | KIAA0859  | KIAA0859                                                                                                                                                                                                                  | 1.2811 | 0.0007 |
| 212418_at   | ELF1      | E74-like factor 1 (ets domain transcription factor)                                                                                                                                                                       | 0.7528 | 0.0277 |
| 212437_at   | CENPB     | centromere protein B; 80kDa                                                                                                                                                                                               | 0.5265 | 0.0311 |
| 212459_x_at | SUCLG2    | succinate-CoA ligase; GDP-forming; beta subunit                                                                                                                                                                           | 0.5778 | 0.0164 |
| 212465_at   | SETD3     | SET domain containing 3                                                                                                                                                                                                   | 0.4971 | 0.0014 |
| 212499_s_at | C14orf32  | FCF1 small subunit (SSU) processome component homolog ( <i>S. cerevisiae</i> ), chromosome 14 open reading frame 32                                                                                                       | 0.4029 | 0.0355 |
| 212587_s_at | PTPRC     | protein tyrosine phosphatase; receptor type; C                                                                                                                                                                            | 1.4029 | 0.0154 |
| 212588_at   | PTPRC     | protein tyrosine phosphatase; receptor type; C                                                                                                                                                                            | 2.0469 | 0.0047 |
| 212600_s_at | UQCRC2    | ubiquinol-cytochrome c reductase core protein II                                                                                                                                                                          | 0.4443 | 0.0325 |
| 212631_at   | STX7      | Syntaxin 7                                                                                                                                                                                                                | 1.2281 | 0.001  |
| 212632_at   | STX7      | Syntaxin 7                                                                                                                                                                                                                | 0.9543 | 0.0126 |
| 212640_at   | PTPLB     | protein tyrosine phosphatase-like (proline instead of catalytic arginine); member b                                                                                                                                       | 0.6648 | 0.0352 |
| 212660_at   | PHF15     | PHD finger protein 15                                                                                                                                                                                                     | 1.3795 | 0.029  |

|             |           |                                                                                                                                                                                                                    |        |        |
|-------------|-----------|--------------------------------------------------------------------------------------------------------------------------------------------------------------------------------------------------------------------|--------|--------|
| 212665_at   | TIPARP    | TCDD-inducible poly(ADP-ribose) polymerase                                                                                                                                                                         | 0.8505 | 0.0139 |
| 212671_s_at | HLA-DQA1  | major histocompatibility complex; class II; DQ alpha 1, major histocompatibility complex; class II; DQ alpha 2, similar to HLA class II histocompatibility antigen; DQ(1) alpha chain precursor (DC-4 alpha chain) | 3.5726 | 0.0003 |
| 212673_at   | METAP1    | methionyl aminopeptidase 1                                                                                                                                                                                         | 0.8971 | 0.0013 |
| 212688_at   | PIK3CB    | phosphoinositide-3-kinase; catalytic; beta polypeptide                                                                                                                                                             | 0.7229 | 0.0435 |
| 212699_at   | SCAMP5    | secretory carrier membrane protein 5                                                                                                                                                                               | 1.4839 | 0.0093 |
| 212701_at   |           | Clone 23962 mRNA sequence                                                                                                                                                                                          | 0.7413 | 0.0039 |
| 212728_at   | DLG3      | discs; large homolog 3 (neuroendocrine-dlg; Drosophila)                                                                                                                                                            | 0.6315 | 0.0324 |
| 212733_at   | KIAA0226  | KIAA0226                                                                                                                                                                                                           | 0.8968 | 0.0111 |
| 212786_at   | CLEC16A   | C-type lectin domain family 16; member A                                                                                                                                                                           | 0.612  | 0.0335 |
| 212798_s_at | ANKMY2    | ankyrin repeat and MYND domain containing 2                                                                                                                                                                        | 0.777  | 0.0169 |
| 212814_at   | KIAA0828  | adenosylhomocysteinase 3                                                                                                                                                                                           | 0.7954 | 0.0236 |
| 212820_at   | DMXL2     | Dmx-like 2                                                                                                                                                                                                         | 1.0083 | 0.0058 |
| 212829_at   | PIP4K2A   | phosphatidylinositol-5-phosphate 4-kinase; type II; alpha                                                                                                                                                          | 1.9908 | 0      |
| 212841_s_at | PPFIBP2   | PTPRF interacting protein; binding protein 2 (liprin beta 2)                                                                                                                                                       | 0.9609 | 0.0271 |
| 212845_at   | SAMD4A    | sterile alpha motif domain containing 4A                                                                                                                                                                           | 1.2995 | 0.0032 |
| 212849_at   | AXIN1     | axin 1                                                                                                                                                                                                             | 0.5379 | 0.0036 |
| 212850_s_at | LRP4      | low density lipoprotein receptor-related protein 4                                                                                                                                                                 | 0.8918 | 0.0155 |
| 212857_x_at | SUB1      | SUB1 homolog (S. cerevisiae)                                                                                                                                                                                       | 0.3092 | 0.0095 |
| 212862_at   | CDS2      | CDP-diacylglycerol synthase (phosphatidate cytidyltransferase) 2                                                                                                                                                   | 0.9459 | 0.0124 |
| 212864_at   | CDS2      | CDP-diacylglycerol synthase (phosphatidate cytidyltransferase) 2                                                                                                                                                   | 0.8612 | 0.0199 |
| 212920_at   |           |                                                                                                                                                                                                                    | 0.5232 | 0.0057 |
| 212942_s_at | KIAA1199  | KIAA1199                                                                                                                                                                                                           | 0.5423 | 0.0317 |
| 212959_s_at | GNPTAB    | N-acetylglucosamine-1-phosphate transferase; alpha and beta subunits                                                                                                                                               | 1.4976 | 0.0156 |
| 212961_x_at | CXorf40B  | chromosome X open reading frame 40B                                                                                                                                                                                | 1.1671 | 0.0027 |
| 212970_at   |           | Full-length cDNA clone CS0DC015YK09 of Neuroblastoma Cot 25-normalized of Homo sapiens (human)                                                                                                                     | 0.7211 | 0.0323 |
| 212972_x_at |           | Full-length cDNA clone CS0DC015YK09 of Neuroblastoma Cot 25-normalized of Homo sapiens (human)                                                                                                                     | 0.176  | 0.0397 |
| 212985_at   |           | Full-length cDNA clone CS0DC015YK09 of Neuroblastoma Cot 25-normalized of Homo sapiens (human)                                                                                                                     | 1.0104 | 0.0084 |
| 213010_at   | PRKCDBP   | protein kinase C; delta binding protein                                                                                                                                                                            | 0.8476 | 0.0386 |
| 213012_at   | NEDD4     | neural precursor cell expressed; developmentally down-regulated 4                                                                                                                                                  | 1.2632 | 0.0003 |
| 213056_at   | FRMD4B    | FERM domain containing 4B                                                                                                                                                                                          | 1.3861 | 0.0094 |
| 213060_s_at | CHI3L2    | chitinase 3-like 2                                                                                                                                                                                                 | 0.3336 | 0.0041 |
| 213073_at   | ZFYVE26   | zinc finger; FYVE domain containing 26                                                                                                                                                                             | 0.646  | 0.0172 |
| 213094_at   | GPR126    | G protein-coupled receptor 126                                                                                                                                                                                     | 0.2955 | 0.0049 |
| 213095_x_at | AIF1      | allograft inflammatory factor 1                                                                                                                                                                                    | 1.7455 | 0.0014 |
| 213112_s_at | SQSTM1    | sequestosome 1                                                                                                                                                                                                     | 1.296  | 0.0225 |
| 213114_at   |           |                                                                                                                                                                                                                    | 0.2502 | 0.0201 |
| 213115_at   | ATG4A     | ATG4 autophagy related 4 homolog A (S. cerevisiae)                                                                                                                                                                 | 1.3257 | 0.0044 |
| 213160_at   | DOCK2     | dedicator of cytokinesis 2                                                                                                                                                                                         | 1.0422 | 0.0175 |
| 213188_s_at | MINA      | MYC induced nuclear antigen                                                                                                                                                                                        | 0.6388 | 0.0066 |
| 213189_at   | MINA      | MYC induced nuclear antigen                                                                                                                                                                                        | 0.92   | 0.0368 |
| 213193_x_at | TRBC1     | T cell receptor beta constant 1, T cell receptor beta variable 19                                                                                                                                                  | 1.3934 | 0.0158 |
| 213203_at   | SNAPC5    | small nuclear RNA activating complex; polypeptide 5; 19kDa                                                                                                                                                         | 0.5575 | 0.0357 |
| 213246_at   | C14orf109 | chromosome 14 open reading frame 109                                                                                                                                                                               | 0.6544 | 0.0369 |
| 213247_at   | SVEP1     | sushi; von Willebrand factor type A; EGF and pentraxin domain containing 1                                                                                                                                         | 1.0068 | 0.0377 |
| 213282_at   |           | CDNA FLJ39590 fis; clone SKNMC1000079                                                                                                                                                                              | 0.8553 | 0.026  |

|             |              |                                                                                         |        |        |
|-------------|--------------|-----------------------------------------------------------------------------------------|--------|--------|
| 213289_at   |              | CDNA FLJ39590 fis; clone SKNMC1000079                                                   | 0.957  | 0.0224 |
| 213315_x_at | CXorf40A     | chromosome X open reading frame 40A                                                     | 1.1798 | 0.0036 |
| 213317_at   | CLIC5        | chloride intracellular channel 5                                                        | 0.6468 | 0.0275 |
| 213333_at   | MDH2         | malate dehydrogenase 2; NAD (mitochondrial)                                             | 0.9152 | 0.0334 |
| 213363_at   |              | Homo sapiens; clone IMAGE:5244869; mRNA                                                 | 0.4181 | 0.0328 |
| 213372_at   | PAQR3        | progesterin and adipoQ receptor family member III                                       | 1.4942 | 0.0006 |
| 213379_at   | COQ2         | coenzyme Q2 homolog; prenyltransferase (yeast)                                          | 0.8133 | 0.0182 |
| 213415_at   | CLIC2        | chloride intracellular channel 2                                                        | 1.8886 | 0.0048 |
| 213416_at   | ITGA4        | integrin; alpha 4 (antigen CD49D; alpha 4 subunit of VLA-4 receptor)                    | 1.6762 | 0.0142 |
| 213419_at   | APBB2        | amyloid beta (A4) precursor protein-binding; family B; member 2 (Fe65-like)             | 0.5705 | 0.0011 |
| 213448_at   |              | CDNA FLJ31688 fis; clone NT2RI2005520                                                   | 0.5088 | 0.0388 |
| 213497_at   | ABTB2        | ankyrin repeat and BTB (POZ) domain containing 2                                        | 0.4717 | 0.0481 |
| 213498_at   | CREB3L1      | cAMP responsive element binding protein 3-like 1                                        | 0.1593 | 0.0169 |
| 213511_s_at | MTMR1        | myotubularin related protein 1                                                          | 0.6762 | 0.0474 |
| 213527_s_at | ZNF688       | zinc finger protein 688                                                                 | 0.9972 | 0.0186 |
| 213529_at   | ZNF688       | zinc finger protein 688                                                                 | 0.379  | 0.0293 |
| 213535_s_at | UBE2I        | ubiquitin-conjugating enzyme E2I (UBC9 homolog; yeast)                                  | 0.4474 | 0.0153 |
| 213539_at   | CD3D         | CD3d molecule; delta (CD3-TCR complex)                                                  | 0.9216 | 0.027  |
| 213546_at   | DKFZp5861420 | hypothetical protein DKFZp5861420                                                       | 1.2187 | 0.0073 |
| 213566_at   | RNASE6       | ribonuclease; RNase A family; k6                                                        | 2.1073 | 0.0054 |
| 213587_s_at | ATP6V0E2     | ATPase; H+ transporting V0 subunit e2                                                   | 1.7595 | 0.0086 |
| 213601_at   | SLIT1        | slit homolog 1 (Drosophila)                                                             | 0.2337 | 0.0348 |
| 213603_s_at | RAC2         | ras-related C3 botulinum toxin substrate 2 (rho family; small GTP binding protein Rac2) | 1.7639 | 0.0223 |
| 213618_at   | CENTD1       | centaurin; delta 1                                                                      | 1.3543 | 0.0047 |
| 213648_at   | EXOSC7       | exosome component 7                                                                     | 0.4871 | 0.0391 |
| 213667_at   | SRCAP        | Snf2-related CBP activator protein                                                      | 0.3876 | 0.0087 |
| 213669_at   | FCHO1        | FCH domain only 1                                                                       | 0.6106 | 0.0214 |
| 213670_x_at | NSUN5B       | NOL1/NOP2/Sun domain family; member 5B                                                  | 0.82   | 0.0371 |
| 213689_x_at | FAM69A       | family with sequence similarity 69; member A                                            | 1.3521 | 0.0206 |
| 213695_at   | PON3         | paraoxonase 3                                                                           | 0.6805 | 0.021  |
| 213712_at   | ELOVL2       | elongation of very long chain fatty acids (FEN1/Elo2; SUR4/Elo3; yeast)-like 2          | 0.5604 | 0.0216 |
| 213724_s_at | PDK2         | pyruvate dehydrogenase kinase; isozyme 2                                                | 0.5949 | 0.0163 |
| 213733_at   | MYO1F        | myosin IF                                                                               | 0.8983 | 0.0445 |
| 213759_at   | ARL4C        | ADP-ribosylation factor-like 4C                                                         | 0.1068 | 0.0403 |
| 213765_at   | MFAP5        | microfibrillar associated protein 5                                                     | 0.284  | 0.0262 |
| 213778_x_at | ZNF276       | zinc finger protein 276                                                                 | 0.3401 | 0.0324 |
| 213780_at   | TCHH         | trichoalyalin                                                                           | 0.1994 | 0.0362 |
| 213795_s_at | PTPRA        | protein tyrosine phosphatase; receptor type; A                                          | 0.8063 | 0.0111 |
| 213807_x_at | MET          | met proto-oncogene (hepatocyte growth factor receptor)                                  | 0.4607 | 0.0001 |
| 213816_s_at | MET          | met proto-oncogene (hepatocyte growth factor receptor)                                  | 0.223  | 0.0094 |
| 213820_s_at | STARD5       | StAR-related lipid transfer (START) domain containing 5                                 | 0.5303 | 0.006  |
| 213824_at   | OLIG2        | oligodendrocyte lineage transcription factor 2                                          | 0.1222 | 0.0165 |
| 213830_at   | TRA@         | T cell receptor alpha locus                                                             | 0.3168 | 0.0092 |
| 213835_x_at | GTPBP3       | GTP binding protein 3 (mitochondrial)                                                   | 0.3113 | 0.0396 |
| 213846_at   | COX7C        | cytochrome c oxidase subunit VIIc                                                       | 0.7282 | 0.0267 |
| 213915_at   | NKG7         | natural killer cell group 7 sequence                                                    | 0.9199 | 0.0019 |
| 213923_at   | RAP2B        | RAP2B; member of RAS oncogene family                                                    | 1.0682 | 0.0171 |
| 213932_x_at | HLA-A        | major histocompatibility complex; class I; A                                            | 0.3201 | 0.0144 |
| 213937_s_at | FTSJ1        | FtsJ homolog 1 (E. coli)                                                                | 0.6067 | 0.042  |
| 213975_s_at | LYZ          | lysozyme (renal amyloidosis)                                                            | 2.1947 | 0.0082 |
| 213982_s_at | RABGAP1L     | RAB GTPase activating protein 1-like                                                    | 1.0923 | 0.0277 |
| 214000_s_at | RGS10        | Regulator of G-protein signalling 10                                                    | 0.1541 | 0.0439 |
| 214015_at   | SOCS7        | suppressor of cytokine signaling 7                                                      | 0.162  | 0.0246 |
| 214045_at   | LIAS         | lipoic acid synthetase                                                                  | 1.1167 | 0.0211 |
| 214049_x_at | CD7          | CD7 molecule                                                                            | 0.3677 | 0.003  |
| 214054_at   | DOK2         | docking protein 2; 56kDa                                                                | 0.6799 | 0.0133 |

|             |           |                                                                                                                                                                                                                                                                                                                                                                                  |        |        |
|-------------|-----------|----------------------------------------------------------------------------------------------------------------------------------------------------------------------------------------------------------------------------------------------------------------------------------------------------------------------------------------------------------------------------------|--------|--------|
| 214058_at   | MYCL1     | v-myc myelocytomatosis viral oncogene homolog 1; lung carcinoma derived (avian)                                                                                                                                                                                                                                                                                                  | 0.2655 | 0.039  |
| 214066_x_at | NPR2      | natriuretic peptide receptor B/guanylate cyclase B (atrionatriuretic peptide receptor B)                                                                                                                                                                                                                                                                                         | 0.4203 | 0.0293 |
| 214084_x_at | LOC648998 | neutrophil cytosolic factor 1; (chronic granulomatous disease; autosomal 1), neutrophil cytosolic factor 1B pseudogene, neutrophil cytosolic factor 1C pseudogene, similar to Neutrophil cytosolic factor 1 (NCF-1) (Neutrophil NADPH oxidase factor 1) (47 kDa neutrophil oxidase factor) (p47-phox) (NCF-47K) (47 kDa autosomal chronic granulomatous disease protein) (NOXO2) | 0.5037 | 0.0136 |
| 214100_x_at | NSUN5B    | NOL1/NOP2/Sun domain family; member 5B                                                                                                                                                                                                                                                                                                                                           | 0.7165 | 0.0436 |
| 214108_at   | MAX       | MYC associated factor X                                                                                                                                                                                                                                                                                                                                                          | 0.2017 | 0.0165 |
| 214112_s_at | CXorf40A  | chromosome X open reading frame 40A, chromosome X open reading frame 40B                                                                                                                                                                                                                                                                                                         | 1.0298 | 0.0077 |
| 214147_at   | C1orf175  | chromosome 1 open reading frame 175                                                                                                                                                                                                                                                                                                                                              | 0.3076 | 0.0242 |
| 214151_s_at | CCPG1     | cell cycle progression 1                                                                                                                                                                                                                                                                                                                                                         | 1.3069 | 0.0437 |
| 214162_at   | LOC284244 | hypothetical protein LOC284244                                                                                                                                                                                                                                                                                                                                                   | 0.2239 | 0.0188 |
| 214164_x_at | CA12      | carbonic anhydrase XII                                                                                                                                                                                                                                                                                                                                                           | 1.3282 | 0.0241 |
| 214175_x_at | PDLIM4    | PDZ and LIM domain 4                                                                                                                                                                                                                                                                                                                                                             | 0.5932 | 0.0436 |
| 214181_x_at | LST1      | leukocyte specific transcript 1                                                                                                                                                                                                                                                                                                                                                  | 1.0305 | 0.018  |
| 214186_s_at | 3.8-1     | MHC class I mRNA fragment 3.8-1                                                                                                                                                                                                                                                                                                                                                  | 0.6042 | 0.0198 |
| 214205_x_at | GLRX3     | glutaredoxin 3                                                                                                                                                                                                                                                                                                                                                                   | 0.2965 | 0.0349 |
| 214218_s_at | XIST      | X (inactive)-specific transcript                                                                                                                                                                                                                                                                                                                                                 | 3.2755 | 0.0378 |
| 214224_s_at | PIN4      | protein (peptidylprolyl cis/trans isomerase) NIMA-interacting; 4 (parvulin)                                                                                                                                                                                                                                                                                                      | 0.68   | 0.0047 |
| 214253_s_at | DTNB      | dystrobrevin; beta                                                                                                                                                                                                                                                                                                                                                               | 0.273  | 0.0118 |
| 214264_s_at | C14orf143 | chromosome 14 open reading frame 143                                                                                                                                                                                                                                                                                                                                             | 0.8848 | 0.0191 |
| 214272_at   | CYLD      | cylindromatosis (turban tumor syndrome)                                                                                                                                                                                                                                                                                                                                          | 0.5367 | 0.0152 |
| 214396_s_at | MBD2      | methyl-CpG binding domain protein 2                                                                                                                                                                                                                                                                                                                                              | 0.1464 | 0.0031 |
| 214411_x_at | CTRB2     | chymotrypsinogen B2                                                                                                                                                                                                                                                                                                                                                              | 1.1727 | 0.05   |
| 214446_at   | ELL2      | elongation factor; RNA polymerase II; 2                                                                                                                                                                                                                                                                                                                                          | 0.5634 | 0.0156 |
| 214447_at   | ETS1      | v-ets erythroblastosis virus E26 oncogene homolog 1 (avian)                                                                                                                                                                                                                                                                                                                      | 0.2044 | 0.0219 |
| 214448_x_at | NFKBIB    | nuclear factor of kappa light polypeptide gene enhancer in B-cells inhibitor; beta                                                                                                                                                                                                                                                                                               | 0.3083 | 0.023  |
| 214455_at   | HIST1H2BC | histone cluster 1; H2bc, histone cluster 1; H2bg                                                                                                                                                                                                                                                                                                                                 | 0.8831 | 0.0346 |
| 214459_x_at | HLA-C     | major histocompatibility complex; class I; C                                                                                                                                                                                                                                                                                                                                     | 0.5895 | 0.0019 |
| 214467_at   | GPR65     | G protein-coupled receptor 65                                                                                                                                                                                                                                                                                                                                                    | 0.5833 | 0.0238 |
| 214469_at   | HIST1H2AE | histone cluster 1; H2ae                                                                                                                                                                                                                                                                                                                                                          | 1.0073 | 0.0451 |
| 214470_at   | KLRB1     | killer cell lectin-like receptor subfamily B; member 1                                                                                                                                                                                                                                                                                                                           | 0.6388 | 0.0074 |
| 214482_at   | ZBTB25    | zinc finger and BTB domain containing 25                                                                                                                                                                                                                                                                                                                                         | 0.4123 | 0.0213 |
| 214483_s_at | ARFIP1    | ADP-ribosylation factor interacting protein 1 (arfaptin 1)                                                                                                                                                                                                                                                                                                                       | 0.8282 | 0.038  |
| 214498_at   | ASIP      | agouti signaling protein; nonagouti homolog (mouse)                                                                                                                                                                                                                                                                                                                              | 0.1574 | 0.0263 |
| 214511_x_at | FCGR1B    | Fc fragment of IgG; high affinity I <sub>b</sub> ; receptor (CD64)                                                                                                                                                                                                                                                                                                               | 1.5253 | 0.0087 |
| 214518_at   | PDHA2     | pyruvate dehydrogenase (lipoamide) alpha 2                                                                                                                                                                                                                                                                                                                                       | 0.1558 | 0.0049 |
| 214525_x_at | MLH3      | mutL homolog 3 (E. coli)                                                                                                                                                                                                                                                                                                                                                         | 0.8454 | 0.0011 |
| 214551_s_at | CD7       | CD7 molecule                                                                                                                                                                                                                                                                                                                                                                     | 0.2846 | 0.045  |
| 214560_at   | FPRL2     | formyl peptide receptor-like 2                                                                                                                                                                                                                                                                                                                                                   | 0.4632 | 0.0103 |
| 214567_s_at | XCL1      | chemokine (C motif) ligand 1, chemokine (C motif) ligand 2                                                                                                                                                                                                                                                                                                                       | 0.9001 | 0.0058 |
| 214574_x_at | LST1      | leukocyte specific transcript 1                                                                                                                                                                                                                                                                                                                                                  | 1.0822 | 0.0063 |
| 214617_at   | PRF1      | perforin 1 (pore forming protein)                                                                                                                                                                                                                                                                                                                                                | 0.9468 | 0.0075 |
| 214625_s_at | MINK1     | misshapen-like kinase 1 (zebrafish)                                                                                                                                                                                                                                                                                                                                              | 0.2824 | 0.0491 |
| 214647_s_at | HFE       | hemochromatosis                                                                                                                                                                                                                                                                                                                                                                  | 0.6177 | 0.0047 |
| 214669_x_at | IGKC      | Immunoglobulin kappa constant                                                                                                                                                                                                                                                                                                                                                    | 1.5135 | 0.0368 |
| 214681_at   | GK        | glycerol kinase                                                                                                                                                                                                                                                                                                                                                                  | 0.8983 | 0.0052 |
| 214691_x_at | FAM63B    | family with sequence similarity 63; member B                                                                                                                                                                                                                                                                                                                                     | 0.5868 | 0.024  |
| 214703_s_at | MAN2B2    | mannosidase; alpha; class 2B; member 2                                                                                                                                                                                                                                                                                                                                           | 0.945  | 0.0054 |
| 214719_at   | SLC46A3   | solute carrier family 46; member 3                                                                                                                                                                                                                                                                                                                                               | 1.3914 | 0.0461 |
| 214745_at   | PLCH1     | phospholipase C; eta 1                                                                                                                                                                                                                                                                                                                                                           | 0.2087 | 0.0302 |
| 214749_s_at | ARMCX6    | armadillo repeat containing; X-linked 6                                                                                                                                                                                                                                                                                                                                          | 0.5522 | 0.0124 |

|             |          |                                                                                                                                                                                                                                                                                                                                                                                                                                                                                                       |        |        |
|-------------|----------|-------------------------------------------------------------------------------------------------------------------------------------------------------------------------------------------------------------------------------------------------------------------------------------------------------------------------------------------------------------------------------------------------------------------------------------------------------------------------------------------------------|--------|--------|
| 214763_at   | ACOT11   | acyl-CoA thioesterase 11                                                                                                                                                                                                                                                                                                                                                                                                                                                                              | 0.644  | 0.0125 |
| 214765_s_at | ASAH1    | N-acylsphingosine amidohydrolase (acid ceramidase)-like                                                                                                                                                                                                                                                                                                                                                                                                                                               | 1.3698 | 0.0133 |
| 214770_at   | MSR1     | macrophage scavenger receptor 1                                                                                                                                                                                                                                                                                                                                                                                                                                                                       | 1.5012 | 0.0096 |
| 214830_at   | SLC38A6  | solute carrier family 38; member 6                                                                                                                                                                                                                                                                                                                                                                                                                                                                    | 1.3432 | 0.0023 |
| 214835_s_at | SUCLG2   | succinate-CoA ligase; GDP-forming; beta subunit                                                                                                                                                                                                                                                                                                                                                                                                                                                       | 0.4752 | 0.0333 |
| 214836_x_at | IGKC     | immunoglobulin kappa constant, immunoglobulin kappa variable 1-5                                                                                                                                                                                                                                                                                                                                                                                                                                      | 1.2069 | 0.0287 |
| 214844_s_at | DOK5     | docking protein 5                                                                                                                                                                                                                                                                                                                                                                                                                                                                                     | 1.6264 | 0.0306 |
| 214847_s_at | GP3M3    | G-protein signaling modulator 3 (AGS3-like; C. elegans)                                                                                                                                                                                                                                                                                                                                                                                                                                               | 0.2592 | 0.007  |
| 214860_at   | SLC9A7   | solute carrier family 9 (sodium/hydrogen exchanger); member 7                                                                                                                                                                                                                                                                                                                                                                                                                                         | 0.1809 | 0.0281 |
| 214876_s_at | TUBGCP5  | tubulin; gamma complex associated protein 5                                                                                                                                                                                                                                                                                                                                                                                                                                                           | 1.0609 | 0.001  |
| 214896_at   |          | MRNA full length insert cDNA clone EUROIMAGE 29222                                                                                                                                                                                                                                                                                                                                                                                                                                                    | 1.556  | 0.0198 |
| 214923_at   | ATP6V1D  | ATPase; H+ transporting; lysosomal 34kDa; V1 subunit D                                                                                                                                                                                                                                                                                                                                                                                                                                                | 0.2869 | 0.0052 |
| 214992_s_at | DNASE2   | deoxyribonuclease II; lysosomal                                                                                                                                                                                                                                                                                                                                                                                                                                                                       | 0.8714 | 0.0213 |
| 215051_x_at | AIF1     | allograft inflammatory factor 1                                                                                                                                                                                                                                                                                                                                                                                                                                                                       | 1.9688 | 0.0014 |
| 215121_x_at | IGL@     | immunoglobulin lambda locus, immunoglobulin lambda variable 2-14, immunoglobulin lambda variable 3-25, immunoglobulin lambda variable 4-3                                                                                                                                                                                                                                                                                                                                                             | 1.6863 | 0.0425 |
| 215125_s_at | UGT1A1   | UDP glucuronosyltransferase 1 family; polypeptide A1, UDP glucuronosyltransferase 1 family; polypeptide A10, UDP glucuronosyltransferase 1 family; polypeptide A3, UDP glucuronosyltransferase 1 family; polypeptide A4, UDP glucuronosyltransferase 1 family; polypeptide A5, UDP glucuronosyltransferase 1 family; polypeptide A6, UDP glucuronosyltransferase 1 family; polypeptide A7, UDP glucuronosyltransferase 1 family; polypeptide A8, UDP glucuronosyltransferase 1 family; polypeptide A9 | 1.7444 | 0.0403 |
| 215176_x_at | NTN2L    | Netrin 2-like (chicken)                                                                                                                                                                                                                                                                                                                                                                                                                                                                               | 1.6776 | 0.0322 |
| 215193_x_at | HLA-DRB1 | hypothetical protein LOC730415, major histocompatibility complex; class II; DR beta 1, major histocompatibility complex; class II; DR beta 3                                                                                                                                                                                                                                                                                                                                                          | 2.0533 | 0.022  |
| 215210_s_at | DLST     | dihydrolipoamide S-succinyltransferase (E2 component of 2-oxo-glutarate complex), dihydrolipoamide S-succinyltransferase pseudogene (E2 component of 2-oxo-glutarate complex)                                                                                                                                                                                                                                                                                                                         | 0.6933 | 0.0436 |
| 215261_at   |          | Clone 23578 mRNA sequence                                                                                                                                                                                                                                                                                                                                                                                                                                                                             | 0.1564 | 0.0194 |
| 215263_at   | ZXDA     | zinc finger; X-linked; duplicated A, zinc finger; X-linked; duplicated B                                                                                                                                                                                                                                                                                                                                                                                                                              | 0.434  | 0.0156 |
| 215313_x_at | HLA-A    | major histocompatibility complex; class I; A                                                                                                                                                                                                                                                                                                                                                                                                                                                          | 0.413  | 0.0067 |
| 215315_at   | ZNF549   | zinc finger protein 549                                                                                                                                                                                                                                                                                                                                                                                                                                                                               | 0.1625 | 0.028  |
| 215325_x_at | C19orf26 | chromosome 19 open reading frame 26                                                                                                                                                                                                                                                                                                                                                                                                                                                                   | 0.1649 | 0.0161 |
| 215332_s_at | CD8B     | CD8b molecule                                                                                                                                                                                                                                                                                                                                                                                                                                                                                         | 0.1594 | 0.0499 |
| 215343_at   | CCDC88C  | coiled-coil domain containing 88C                                                                                                                                                                                                                                                                                                                                                                                                                                                                     | 0.1705 | 0.0392 |
| 215362_at   |          | Clone 23738 mRNA sequence                                                                                                                                                                                                                                                                                                                                                                                                                                                                             | 0.1226 | 0.0193 |
| 215379_x_at | IGL@     | immunoglobulin lambda joining 3, immunoglobulin lambda locus, immunoglobulin lambda variable 2-14, immunoglobulin lambda variable 3-25                                                                                                                                                                                                                                                                                                                                                                | 1.7439 | 0.0374 |
| 215380_s_at | C7orf24  | chromosome 7 open reading frame 24                                                                                                                                                                                                                                                                                                                                                                                                                                                                    | 0.4622 | 0.0184 |
| 215494_at   |          | Apoptotic-related protein PCAR                                                                                                                                                                                                                                                                                                                                                                                                                                                                        | 0.105  | 0.0465 |
| 215495_s_at | SAMD4A   | sterile alpha motif domain containing 4A                                                                                                                                                                                                                                                                                                                                                                                                                                                              | 0.3338 | 0.0136 |
| 215565_at   | DTNB     | dystrobrevin; beta                                                                                                                                                                                                                                                                                                                                                                                                                                                                                    | 0.2334 | 0.027  |
| 215602_at   | FGD2     | FYVE; RhoGEF and PH domain containing 2                                                                                                                                                                                                                                                                                                                                                                                                                                                               | 0.1898 | 0.0056 |
| 215633_x_at | LST1     | leukocyte specific transcript 1                                                                                                                                                                                                                                                                                                                                                                                                                                                                       | 0.9607 | 0.0104 |
| 215660_s_at | MAST2    | microtubule associated serine/threonine kinase 2                                                                                                                                                                                                                                                                                                                                                                                                                                                      | 0.2877 | 0.0191 |
| 215663_at   | MBNL1    | muscleblind-like (Drosophila)                                                                                                                                                                                                                                                                                                                                                                                                                                                                         | 0.1304 | 0.0149 |
| 215666_at   | HLA-DRB4 | major histocompatibility complex; class II; DR beta 4                                                                                                                                                                                                                                                                                                                                                                                                                                                 | 0.1541 | 0.0233 |
| 215706_x_at | ZYX      | zyxin                                                                                                                                                                                                                                                                                                                                                                                                                                                                                                 | 1.4202 | 0.0019 |
| 215732_s_at | DTX2     | deltex homolog 2 (Drosophila)                                                                                                                                                                                                                                                                                                                                                                                                                                                                         | 0.3207 | 0.0202 |
| 215771_x_at | RET      | ret proto-oncogene                                                                                                                                                                                                                                                                                                                                                                                                                                                                                    | 0.3356 | 0.0166 |

|             |           |                                                                                                                                                                                                                   |        |        |
|-------------|-----------|-------------------------------------------------------------------------------------------------------------------------------------------------------------------------------------------------------------------|--------|--------|
| 215772_x_at | SUCLG2    | succinate-CoA ligase; GDP-forming; beta subunit                                                                                                                                                                   | 0.5735 | 0.0155 |
| 215779_s_at | HIST1H2BG | histone cluster 1; H2bg                                                                                                                                                                                           | 1.1522 | 0.0302 |
| 215784_at   | CD1E      | CD1e molecule                                                                                                                                                                                                     | 0.1784 | 0.017  |
| 215806_x_at | TARP      | T cell receptor gamma constant 2, T cell receptor gamma variable 9, TCR gamma alternate reading frame protein                                                                                                     | 0.3596 | 0.0358 |
| 215843_s_at | TLL2      | tolloid-like 2                                                                                                                                                                                                    | 0.2045 | 0.0082 |
| 215884_s_at | UBQLN2    | ubiquilin 2                                                                                                                                                                                                       | 0.531  | 0.0103 |
| 215894_at   | PTGDR     | prostaglandin D2 receptor (DP)                                                                                                                                                                                    | 1.174  | 0.027  |
| 215903_s_at | MAST2     | microtubule associated serine/threonine kinase 2                                                                                                                                                                  | 0.5414 | 0.0492 |
| 215961_at   | F12       | coagulation factor XII (Hageman factor)                                                                                                                                                                           | 0.1256 | 0.0386 |
| 215967_s_at | LY9       | lymphocyte antigen 9                                                                                                                                                                                              | 0.2674 | 0.031  |
| 216013_at   | ZXDB      | zinc finger; X-linked; duplicated B                                                                                                                                                                               | 0.2404 | 0.0047 |
| 216014_s_at | ZXDA      | zinc finger; X-linked; duplicated A, zinc finger; X-linked; duplicated B                                                                                                                                          | 0.153  | 0.0338 |
| 216020_at   | IFIH1     | Interferon induced with helicase C domain 1                                                                                                                                                                       | 0.1409 | 0.0452 |
| 216041_x_at | GRN       | granulin                                                                                                                                                                                                          | 0.8537 | 0.0147 |
| 216044_x_at | FAM69A    | family with sequence similarity 69; member A                                                                                                                                                                      | 1.2736 | 0.0191 |
| 216058_s_at | CYP2C19   | cytochrome P450; family 2; subfamily C; polypeptide 19                                                                                                                                                            | 0.1093 | 0.0077 |
| 216064_s_at | AGA       | aspartylglucosaminidase                                                                                                                                                                                           | 1.726  | 0.0013 |
| 216102_at   | PHLDB1    | pleckstrin homology-like domain; family B; member 1                                                                                                                                                               | 0.1139 | 0.031  |
| 216162_at   | SBNO1     | Strawberry notch homolog 1 (Drosophila)                                                                                                                                                                           | 0.1128 | 0.0444 |
| 216191_s_at | TRA@      | T cell receptor alpha locus, T cell receptor delta locus                                                                                                                                                          | 0.2161 | 0.0379 |
| 216203_at   | SPTLC2    | serine palmitoyltransferase; long chain base subunit 2                                                                                                                                                            | 0.1493 | 0.033  |
| 216207_x_at | IGKV1D-13 | immunoglobulin kappa variable 1D-13                                                                                                                                                                               | 1.1906 | 0.0418 |
| 216231_s_at | B2M       | beta-2-microglobulin                                                                                                                                                                                              | 0.4803 | 0.0002 |
| 216250_s_at | LPXN      | leupaxin                                                                                                                                                                                                          | 1.1437 | 0.0485 |
| 216323_x_at | TUBA3D    | tubulin; alpha 3d                                                                                                                                                                                                 | 0.2353 | 0.0219 |
| 216352_x_at | PCDHGA3   | protocadherin gamma subfamily A; 3                                                                                                                                                                                | 1.0192 | 0.0015 |
| 216365_x_at | CPVL      | carboxypeptidase; vitellogenic-like, immunoglobulin lambda locus                                                                                                                                                  | 0.1176 | 0.0496 |
| 216430_x_at |           | Clone CPRF1-T2 immunoglobulin lambda chain VJ region; (IGL)                                                                                                                                                       | 0.2133 | 0.0232 |
| 216440_at   | ERC1      | ELKS/RAB6-interacting/CAST family member 1                                                                                                                                                                        | 0.2007 | 0.0062 |
| 216526_x_at | HLA-C     | major histocompatibility complex; class I; C                                                                                                                                                                      | 0.5528 | 0.0048 |
| 216532_x_at | LOC728344 | similar to Thioredoxin-like protein 2 (PKC-interacting cousin of thioredoxin) (PKC-theta-interacting protein) (PKCq-interacting protein)                                                                          | 0.3749 | 0.0486 |
| 216548_x_at | HMG4L     | high-mobility group (nonhistone chromosomal) protein 4-like                                                                                                                                                       | 1.0492 | 0.0062 |
| 216564_at   |           |                                                                                                                                                                                                                   | 0.1395 | 0.0184 |
| 216629_at   | SRRM2     | Serine/arginine repetitive matrix 2                                                                                                                                                                               | 0.2352 | 0.0213 |
| 216661_x_at | CYP2C9    | Cytochrome P450; family 2; subfamily C; polypeptide 9                                                                                                                                                             | 0.1438 | 0.0281 |
| 216667_at   | LOC643332 | ribonuclease; RNase A family; 2 (liver; eosinophil-derived neurotoxin), similar to Nonsecretory ribonuclease precursor (Ribonuclease US) (Eosinophil-derived neurotoxin) (RNase Upl-2) (Ribonuclease 2) (RNase 2) | 0.1183 | 0.0349 |
| 216690_at   | OR7C1     | olfactory receptor; family 7; subfamily C; member 1                                                                                                                                                               | 0.2276 | 0.0156 |
| 216731_s_at |           | CDNA FLJ13628 fis; clone PLACE1011054                                                                                                                                                                             | 0.1809 | 0.041  |
| 216750_at   | APBB2     | amyloid beta (A4) precursor protein-binding; family B; member 2 (Fe65-like)                                                                                                                                       | 0.1238 | 0.0276 |
| 216807_at   | KIAA1751  | KIAA1751                                                                                                                                                                                                          | 0.1682 | 0.0459 |
| 216841_s_at | SOD2      | superoxide dismutase 2; mitochondrial                                                                                                                                                                             | 0.8736 | 0.0496 |
| 216845_x_at | TNRC21    | trinucleotide repeat containing 21                                                                                                                                                                                | 0.1263 | 0.045  |
| 216862_s_at | MTCP1     | mature T-cell proliferation 1                                                                                                                                                                                     | 0.6089 | 0.0442 |
| 216880_at   | RAD51L1   | RAD51-like 1 (S. cerevisiae)                                                                                                                                                                                      | 0.1185 | 0.0317 |
| 216919_at   | TP53I11   | tumor protein p53 inducible protein 11                                                                                                                                                                            | 0.145  | 0.0133 |
| 216920_s_at | TARP      | T cell receptor gamma constant 2, T cell receptor gamma variable 9, TCR gamma alternate reading frame protein                                                                                                     | 0.6119 | 0.0145 |
| 216942_s_at | CD58      | CD58 molecule                                                                                                                                                                                                     | 1.4566 | 0.0253 |
| 216950_s_at | FCGR1A    | Fc fragment of IgG; high affinity Ia; receptor (CD64)                                                                                                                                                             | 1.1475 | 0.0257 |

|             |           |                                                                                                |        |        |
|-------------|-----------|------------------------------------------------------------------------------------------------|--------|--------|
| 216981_x_at | SPN       | sialophorin (leukosialin; CD43)                                                                | 0.1666 | 0.0422 |
| 217000_at   | KRT18P50  | keratin 18 pseudogene 50                                                                       | 0.2085 | 0.0264 |
| 217007_s_at | ADAM15    | ADAM metallopeptidase domain 15                                                                | 0.2242 | 0.0265 |
| 217022_s_at | IGHA1     | immunoglobulin heavy constant alpha 1, immunoglobulin heavy constant alpha 2 (A2m marker)      | 1.7431 | 0.0433 |
| 217023_x_at | TPSAB1    | tryptase alpha/beta 1, tryptase beta 2                                                         | 0.7157 | 0.0468 |
| 217043_s_at | MFN1      | mitofusin 1                                                                                    | 0.7907 | 0.0151 |
| 217048_at   | SHC1      | SHC (Src homology 2 domain containing) transforming protein 1                                  | 0.1877 | 0.004  |
| 217078_s_at | CD300A    | CD300a molecule                                                                                | 0.3544 | 0.0302 |
| 217106_x_at | DIMT1L    | DIM1 dimethyladenosine transferase 1-like (S. cerevisiae)                                      | 0.5988 | 0.0123 |
| 217107_at   | LOC442257 | similar to 40S ribosomal protein S4; Y isoform 2                                               | 0.257  | 0.0175 |
| 217125_at   |           |                                                                                                | 0.69   | 0.0316 |
| 217135_x_at |           |                                                                                                | 0.1903 | 0.0376 |
| 217143_s_at | TRA@      | T cell receptor alpha locus, T cell receptor delta locus                                       | 0.4525 | 0.003  |
| 217157_x_at |           | Immunoglobulin kappa chain; V-region (SPK.3)                                                   | 0.3343 | 0.0258 |
| 217168_s_at | HERPUD1   | homocysteine-inducible; endoplasmic reticulum stress-inducible; ubiquitin-like domain member 1 | 0.5282 | 0.0267 |
| 217216_x_at | MLH3      | mutL homolog 3 (E. coli)                                                                       | 0.8218 | 0.0335 |
| 217235_x_at |           | Immunoglobulin (mAb56) light chain V region mRNA; partial sequence                             | 0.3792 | 0.0252 |
| 217239_x_at | CPVL      | Carboxypeptidase; vitellogenic-like, Immunoglobulin heavy chain; partial; clone VH3-7          | 0.1451 | 0.0165 |
| 217249_x_at |           |                                                                                                | 0.3477 | 0.0277 |
| 217258_x_at | IVD       | Isovaleryl Coenzyme A dehydrogenase                                                            | 0.3753 | 0.0446 |
| 217281_x_at | IL8       | Interleukin 8                                                                                  | 0.4251 | 0.0218 |
| 217299_s_at | NBN       | nibrin                                                                                         | 0.5854 | 0.0198 |
| 217305_s_at | SAC       | testicular soluble adenylyl cyclase                                                            | 0.144  | 0.007  |
| 217307_at   |           |                                                                                                | 0.2401 | 0.0081 |
| 217329_x_at |           |                                                                                                | 0.6398 | 0.0011 |
| 217334_at   | OR2J3     | olfactory receptor; family 2; subfamily J; member 3                                            | 0.1713 | 0.0027 |
| 217349_s_at | LMO6      | LIM domain only 6                                                                              | 0.4968 | 0.003  |
| 217354_s_at | HPS1      | Hermansky-Pudlak syndrome 1, similar to Hermansky-Pudlak syndrome 1 protein isoform b          | 0.3231 | 0.0004 |
| 217362_x_at | HLA-DRB6  | major histocompatibility complex; class II; DR beta 6 (pseudogene)                             | 0.9165 | 0.0063 |
| 217372_at   |           |                                                                                                | 0.1029 | 0.0047 |
| 217374_x_at | TRGV5     | T cell receptor gamma variable 5                                                               | 0.1203 | 0.0222 |
| 217379_at   | LOC442171 | similar to ribosomal protein L10                                                               | 0.4146 | 0.0188 |
| 217436_x_at | LOC730399 | hypothetical protein LOC730399, hypothetical protein LOC731974                                 | 0.9482 | 0.0046 |
| 217450_at   |           |                                                                                                | 0.1055 | 0.0157 |
| 217456_x_at | HLA-E     | major histocompatibility complex; class I; E                                                   | 0.5549 | 0.0063 |
| 217475_s_at | LIMK2     | LIM domain kinase 2                                                                            | 0.2522 | 0.0019 |
| 217478_s_at | HLA-DMA   | major histocompatibility complex; class II; DM alpha                                           | 2.6126 | 0.0015 |
| 217484_at   | CR1       | complement component (3b/4b) receptor 1 (Knops blood group)                                    | 0.2199 | 0.0064 |
| 217491_x_at | COX7C     | cytochrome c oxidase subunit VIIc                                                              | 0.3582 | 0.0191 |
| 217502_at   | IFIT2     | interferon-induced protein with tetratricopeptide repeats 2                                    | 0.9265 | 0.0431 |
| 217511_at   | KAZALD1   | Kazal-type serine peptidase inhibitor domain 1                                                 | 0.3164 | 0.0259 |
| 217520_x_at | LOC731884 | Similar to programmed cell death 6 interacting protein                                         | 0.7924 | 0.0473 |
| 217559_at   | RPL10L    | ribosomal protein L10-like                                                                     | 0.242  | 0.0161 |
| 217606_at   |           | MRNA; cDNA DKFZp686P24158 (from clone DKFZp686P24158)                                          | 0.5071 | 0.0436 |
| 217618_x_at | HUS1      | HUS1 checkpoint homolog (S. pombe)                                                             | 0.4795 | 0.003  |
| 217621_at   |           |                                                                                                | 0.144  | 0.0473 |
| 217629_at   |           | Transcribed locus                                                                              | 0.1263 | 0.0202 |
| 217685_at   | SLC16A3   | Solute carrier family 16; member 3 (monocarboxylic acid transporter 4)                         | 0.1479 | 0.0359 |
| 217727_x_at | VPS35     | vacuolar protein sorting 35 homolog (S. cerevisiae)                                            | 0.2895 | 0.0385 |

|             |                  |                                                                                                         |        |        |
|-------------|------------------|---------------------------------------------------------------------------------------------------------|--------|--------|
| 217773_s_at | NDUFA4           | NADH dehydrogenase (ubiquinone) 1 alpha subcomplex; 4; 9kDa                                             | 0.4661 | 0.0057 |
| 217784_at   | YKT6             | YKT6 v-SNARE homolog ( <i>S. cerevisiae</i> )                                                           | 0.8799 | 0.0277 |
| 217785_s_at | YKT6             | YKT6 v-SNARE homolog ( <i>S. cerevisiae</i> )                                                           | 1.2703 | 0.0245 |
| 217790_s_at | SSR3             | signal sequence receptor; gamma (translocon-associated protein gamma)                                   | 0.7477 | 0.0081 |
| 217809_at   | BZW2             | basic leucine zipper and W2 domains 2                                                                   | 0.9626 | 0.007  |
| 217827_s_at | SPG21            | spastic paraplegia 21 (autosomal recessive; Mast syndrome)                                              | 0.4458 | 0.0268 |
| 217835_x_at | C20orf24         | chromosome 20 open reading frame 24                                                                     | 0.6696 | 0.0015 |
| 217838_s_at | EVL              | Enah/Vasp-like                                                                                          | 0.9222 | 0.0151 |
| 217865_at   | RNF130           | ring finger protein 130                                                                                 | 0.949  | 0.0224 |
| 217933_s_at | LAP3             | leucine aminopeptidase 3                                                                                | 0.7073 | 0.0037 |
| 217956_s_at | ENOPH1           | enolase-phosphatase 1                                                                                   | 0.3405 | 0.0459 |
| 217957_at   | C16orf80         | chromosome 16 open reading frame 80                                                                     | 0.722  | 0.0077 |
| 217961_at   | SLC25A38         | solute carrier family 25; member 38                                                                     | 0.5941 | 0.0324 |
| 217962_at   | NOLA3            | nucleolar protein family A; member 3 (H/ACA small nucleolar RNPs)                                       | 0.7615 | 0      |
| 217963_s_at | NGFRAP1          | nerve growth factor receptor (TNFRSF16) associated protein 1                                            | 0.2692 | 0.0363 |
| 217972_at   | CHCHD3           | coiled-coil-helix-coiled-coil-helix domain containing 3                                                 | 0.4986 | 0.0292 |
| 217976_s_at | DYNC1L11         | dynein; cytoplasmic 1; light intermediate chain 1                                                       | 0.7242 | 0.0171 |
| 217977_at   | SEPX1            | selenoprotein X; 1                                                                                      | 1.0181 | 0.0121 |
| 217979_at   | TSPAN13          | Tetraspanin 13                                                                                          | 0.6025 | 0.0232 |
| 217990_at   | GMPR2            | guanosine monophosphate reductase 2                                                                     | 0.882  | 0.007  |
| 217993_s_at | MAT2B            | methionine adenosyltransferase II; beta                                                                 | 0.6277 | 0.0027 |
| 217995_at   | SQRDL            | sulfide quinone reductase-like (yeast)                                                                  | 1.8107 | 0.006  |
| 218023_s_at | FAM53C           | family with sequence similarity 53; member C                                                            | 0.8263 | 0.0048 |
| 218027_at   | MRPL15           | mitochondrial ribosomal protein L15                                                                     | 0.7397 | 0.0036 |
| 218034_at   | FIS1             | fission 1 (mitochondrial outer membrane) homolog ( <i>S. cerevisiae</i> )                               | 0.4932 | 0.025  |
| 218042_at   | COPS4            | COP9 constitutive photomorphogenic homolog subunit 4 ( <i>Arabidopsis</i> )                             | 0.3704 | 0.0353 |
| 218059_at   | ZNF706           | zinc finger protein 706                                                                                 | 0.4388 | 0.0318 |
| 218069_at   | XTP3TPA          | XTP3-transactivated protein A                                                                           | 1.0018 | 0.0005 |
| 218076_s_at | ARHGAP17         | Rho GTPase activating protein 17                                                                        | 0.7206 | 0.0038 |
| 218081_at   | C20orf27         | chromosome 20 open reading frame 27                                                                     | 0.4789 | 0.0237 |
| 218086_at   | NPDC1            | neural proliferation; differentiation and control; 1                                                    | 1.062  | 0.0455 |
| 218094_s_at | C20orf169-DBNDD2 | C20orf169-DBNDD2 readthrough transcript, dysbindin (dystrobrevin binding protein 1) domain containing 2 | 1.3224 | 0.0058 |
| 218109_s_at | MFSD1            | major facilitator superfamily domain containing 1                                                       | 0.6135 | 0.0034 |
| 218112_at   | MRPS34           | mitochondrial ribosomal protein S34                                                                     | 0.6795 | 0.0113 |
| 218131_s_at | GATAD2A          | GATA zinc finger domain containing 2A                                                                   | 0.7003 | 0.0127 |
| 218138_at   | MKKS             | McKusick-Kaufman syndrome                                                                               | 0.9246 | 0.0039 |
| 218143_s_at | SCAMP2           | secretory carrier membrane protein 2                                                                    | 0.6627 | 0.0139 |
| 218161_s_at | CLN6             | ceroid-lipofuscinosis; neuronal 6; late infantile; variant                                              | 0.6866 | 0.0033 |
| 218163_at   | MCTS1            | malignant T cell amplified sequence 1                                                                   | 0.791  | 0.0097 |
| 218200_s_at | NDUFB2           | NADH dehydrogenase (ubiquinone) 1 beta subcomplex; 2; 8kDa                                              | 0.4923 | 0.0021 |
| 218201_at   | NDUFB2           | NADH dehydrogenase (ubiquinone) 1 beta subcomplex; 2; 8kDa                                              | 0.6169 | 0.0066 |
| 218219_s_at | LANCL2           | LanC lantibiotic synthetase component C-like 2 (bacterial)                                              | 0.7339 | 0.0487 |
| 218230_at   | ARFIP1           | ADP-ribosylation factor interacting protein 1 (arfaptin 1)                                              | 0.4467 | 0.0245 |
| 218232_at   | C1QA             | complement component 1; q subcomponent; A chain                                                         | 1.5955 | 0.0228 |
| 218246_at   | C1orf166         | chromosome 1 open reading frame 166                                                                     | 0.587  | 0.0215 |
| 218248_at   | FAM111A          | family with sequence similarity 111; member A                                                           | 0.7091 | 0.0324 |
| 218256_s_at | NUP54            | nucleoporin 54kDa                                                                                       | 0.4865 | 0.0237 |
| 218267_at   | CINP             | cyclin-dependent kinase 2-interacting protein                                                           | 0.3721 | 0.0081 |
| 218282_at   | EDEM2            | ER degradation enhancer; mannosidase alpha-like 2                                                       | 0.6786 | 0.0206 |
| 218317_x_at | GIYD1            | GIY-YIG domain containing 1, GIY-YIG domain containing 2                                                | 0.7125 | 0.036  |



|             |           |                                                                                                                                                       |        |        |
|-------------|-----------|-------------------------------------------------------------------------------------------------------------------------------------------------------|--------|--------|
| 218320_s_at | NDUFB11   | NADH dehydrogenase (ubiquinone) 1 beta subcomplex; 11; 17.3kDa                                                                                        | 0.4962 | 0.0253 |
| 218329_at   | PRDM4     | PR domain containing 4                                                                                                                                | 1.0194 | 0.0176 |
| 218347_at   | TYW1      | tRNA-yW synthesizing protein 1 homolog (S. cerevisiae)                                                                                                | 0.7564 | 0.0184 |
| 218351_at   | COMMD8    | COMM domain containing 8                                                                                                                              | 0.819  | 0.0066 |
| 218354_at   | TRAPPC2L  | trafficking protein particle complex 2-like                                                                                                           | 0.7381 | 0.0425 |
| 218356_at   | FTSJ2     | FtsJ homolog 2 (E. coli)                                                                                                                              | 0.4286 | 0.0349 |
| 218384_at   | CARHSP1   | calcium regulated heat stable protein 1; 24kDa                                                                                                        | 1.1341 | 0.0081 |
| 218395_at   | ACTR6     | ARP6 actin-related protein 6 homolog (yeast)                                                                                                          | 0.4727 | 0.0281 |
| 218408_at   | TIMM10    | translocase of inner mitochondrial membrane 10 homolog (yeast)                                                                                        | 0.8293 | 0.0012 |
| 218417_s_at | FLJ20489  | hypothetical protein FLJ20489                                                                                                                         | 1.1736 | 0.0164 |
| 218485_s_at | SLC35C1   | solute carrier family 35; member C1                                                                                                                   | 0.2086 | 0.0449 |
| 218495_at   | UXT       | ubiquitously-expressed transcript                                                                                                                     | 0.6614 | 0.0138 |
| 218506_x_at | N-PAC     | cytokine-like nuclear factor n-pac                                                                                                                    | 0.4781 | 0.0346 |
| 218513_at   | FLJ11184  | hypothetical protein FLJ11184                                                                                                                         | 0.431  | 0.0434 |
| 218526_s_at | RANGRF    | RAN guanine nucleotide release factor                                                                                                                 | 0.5695 | 0.0168 |
| 218534_s_at | AGGF1     | angiogenic factor with G patch and FHA domains 1                                                                                                      | 0.7701 | 0.0149 |
| 218540_at   | THTPA     | thiamine triphosphatase                                                                                                                               | 0.6009 | 0.0353 |
| 218543_s_at | PARP12    | poly (ADP-ribose) polymerase family; member 12                                                                                                        | 1.4546 | 0.0029 |
| 218544_s_at | RCL1      | RNA terminal phosphate cyclase-like 1                                                                                                                 | 0.4965 | 0.0315 |
| 218557_at   | NIT2      | nitrilase family; member 2                                                                                                                            | 0.7804 | 0.0041 |
| 218571_s_at | CHMP4A    | chromatin modifying protein 4A                                                                                                                        | 0.5406 | 0.014  |
| 218572_at   | CHMP4A    | chromatin modifying protein 4A                                                                                                                        | 0.6462 | 0.0112 |
| 218580_x_at | AURKAIP1  | aurora kinase A interacting protein 1, similar to Cyclin-L2 (Paneth cell-enhanced expression protein)                                                 | 0.4646 | 0.045  |
| 218583_s_at | DCUN1D1   | DCN1; defective in cullin neddylation 1; domain containing 1 (S. cerevisiae)                                                                          | 0.5167 | 0.0032 |
| 218598_at   | RINT1     | RAD50 interactor 1                                                                                                                                    | 0.649  | 0.0387 |
| 218606_at   | ZDHC7     | zinc finger; DHC-type containing 7                                                                                                                    | 0.677  | 0.0051 |
| 218607_s_at | SDAD1     | SDA1 domain containing 1                                                                                                                              | 0.7229 | 0.0191 |
| 218609_s_at | NUDT2     | nudix (nucleoside diphosphate linked moiety X)-type motif 2                                                                                           | 0.8312 | 0.0021 |
| 218616_at   | INTS12    | integrator complex subunit 12                                                                                                                         | 0.469  | 0.0195 |
| 218619_s_at | SUV39H1   | suppressor of variegation 3-9 homolog 1 (Drosophila)                                                                                                  | 0.6627 | 0.019  |
| 218654_s_at | MRPS33    | mitochondrial ribosomal protein S33                                                                                                                   | 0.5788 | 0.0179 |
| 218660_at   | DYSF      | dysferlin; limb girdle muscular dystrophy 2B (autosomal recessive)                                                                                    | 0.7527 | 0.0456 |
| 218668_s_at | RAP2C     | RAP2C; member of RAS oncogene family                                                                                                                  | 0.4971 | 0.0184 |
| 218669_at   | RAP2C     | RAP2C; member of RAS oncogene family                                                                                                                  | 0.4342 | 0.0451 |
| 218670_at   | PUS1      | pseudouridylylase synthase 1                                                                                                                          | 0.5983 | 0.0357 |
| 218701_at   | LACTB2    | lactamase; beta 2                                                                                                                                     | 1.1529 | 0.0183 |
| 218703_at   | SEC22A    | SEC22 vesicle trafficking protein homolog A (S. cerevisiae)                                                                                           | 0.3299 | 0.0484 |
| 218708_at   | NXT1      | NTF2-like export factor 1                                                                                                                             | 0.6262 | 0.008  |
| 218719_s_at | GINS3     | GINS complex subunit 3 (Psf3 homolog)                                                                                                                 | 1.078  | 0.0179 |
| 218722_s_at | CCDC51    | coiled-coil domain containing 51                                                                                                                      | 0.5164 | 0.0243 |
| 218731_s_at | LOC727901 | similar to von Willebrand factor A domain-related protein isoform 1, von Willebrand factor A domain containing 1                                      | 0.7741 | 0.0222 |
| 218733_at   | MSL2L1    | male-specific lethal 2-like 1 (Drosophila)                                                                                                            | 0.6672 | 0.0345 |
| 218739_at   | ABHD5     | abhydrolase domain containing 5                                                                                                                       | 0.604  | 0.0486 |
| 218746_at   | TAPBPL    | TAP binding protein-like                                                                                                                              | 1.1033 | 0.004  |
| 218747_s_at | TAPBPL    | TAP binding protein-like                                                                                                                              | 1.2642 | 0.0019 |
| 218757_s_at | UPF3B     | UPF3 regulator of nonsense transcripts homolog B (yeast)                                                                                              | 0.9128 | 0.0464 |
| 218764_at   | PRKCH     | protein kinase C; eta                                                                                                                                 | 1.4555 | 0.0467 |
| 218797_s_at | LOC644124 | similar to NAD-dependent deacetylase sirtuin-7 (SIR2-like protein 7), sirtuin (silent mating type information regulation 2 homolog) 7 (S. cerevisiae) | 0.6481 | 0.0216 |
| 218800_at   | SRD5A2L   | steroid 5 alpha-reductase 2-like                                                                                                                      | 0.3472 | 0.0124 |
| 218802_at   | CCDC109B  | coiled-coil domain containing 109B                                                                                                                    | 1.8512 | 0.0012 |
| 218805_at   | GIMAP5    | GTPase; IMAP family member 5                                                                                                                          | 0.9113 | 0.0176 |

|             |           |                                                                             |        |        |
|-------------|-----------|-----------------------------------------------------------------------------|--------|--------|
| 218806_s_at | VAV3      | vav 3 guanine nucleotide exchange factor                                    | 0.2965 | 0.002  |
| 218807_at   | VAV3      | vav 3 guanine nucleotide exchange factor                                    | 0.7367 | 0.0132 |
| 218816_at   | LRRC1     | leucine rich repeat containing 1                                            | 0.6584 | 0.0327 |
| 218821_at   | NPEPL1    | aminopeptidase-like 1                                                       | 0.5123 | 0.0068 |
| 218822_s_at | NPEPL1    | aminopeptidase-like 1                                                       | 0.4688 | 0.0037 |
| 218841_at   | ASB8      | ankyrin repeat and SOCS box-containing 8                                    | 0.687  | 0.0374 |
| 218853_s_at | MOSPD1    | motile sperm domain containing 1                                            | 0.8091 | 0.0465 |
| 218854_at   | DSE       | dermatan sulfate epimerase                                                  | 0.9342 | 0.0092 |
| 218860_at   | NOC4L     | nucleolar complex associated 4 homolog (S. cerevisiae)                      | 0.4471 | 0.0346 |
| 218868_at   | ACTR3B    | ARP3 actin-related protein 3 homolog B (yeast)                              | 0.5308 | 0.0432 |
| 218870_at   | ARHGAP15  | Rho GTPase activating protein 15                                            | 1.3131 | 0.0344 |
| 218903_s_at | OBFC2B    | oligonucleotide/oligosaccharide-binding fold containing 2B                  | 0.9285 | 0.0163 |
| 218910_at   | TMEM16K   | transmembrane protein 16K                                                   | 0.7808 | 0.0432 |
| 218912_at   | GCC1      | GRIP and coiled-coil domain containing 1                                    | 1.2809 | 0.0014 |
| 218926_at   | MYNN      | myoneurin                                                                   | 0.458  | 0.0489 |
| 218927_s_at | CHST12    | carbohydrate (chondroitin 4) sulfotransferase 12                            | 0.6838 | 0.0204 |
| 218933_at   | SPATA5L1  | spermatogenesis associated 5-like 1                                         | 0.846  | 0.0007 |
| 218937_at   | ZNF434    | zinc finger protein 434                                                     | 0.9582 | 0.0005 |
| 218956_s_at | PTCD1     | pentatricopeptide repeat domain 1                                           | 0.5307 | 0.0403 |
| 218958_at   | C19orf60  | chromosome 19 open reading frame 60                                         | 0.5276 | 0.0491 |
| 218968_s_at | ZFP64     | zinc finger protein 64 homolog (mouse)                                      | 0.7658 | 0.022  |
| 218971_s_at | WDR91     | WD repeat domain 91                                                         | 1.1194 | 0.002  |
| 218973_at   | EFTUD1    | elongation factor Tu GTP binding domain containing 1                        | 1.5608 | 0.0002 |
| 218982_s_at | MRPS17    | mitochondrial ribosomal protein S17                                         | 0.6829 | 0.0149 |
| 218986_s_at | FLJ20035  | hypothetical protein FLJ20035                                               | 1.1544 | 0.0078 |
| 218987_at   | ATF7IP    | activating transcription factor 7 interacting protein                       | 0.9675 | 0.0379 |
| 218989_x_at | SLC30A5   | solute carrier family 30 (zinc transporter); member 5                       | 0.4046 | 0.0435 |
| 218992_at   | C9orf46   | chromosome 9 open reading frame 46                                          | 1.0444 | 0.0102 |
| 218999_at   | TMEM140   | transmembrane protein 140                                                   | 1.7768 | 0.0014 |
| 219010_at   | C1orf106  | chromosome 1 open reading frame 106                                         | 0.3174 | 0.0094 |
| 219014_at   | PLAC8     | placenta-specific 8                                                         | 1.0218 | 0.0352 |
| 219015_s_at | ALG13     | asparagine-linked glycosylation 13 homolog (S. cerevisiae)                  | 1.6185 | 0.0052 |
| 219047_s_at | ZNF668    | zinc finger protein 668                                                     | 0.4132 | 0.0378 |
| 219061_s_at | LAGE3     | L antigen family; member 3                                                  | 1.4161 | 0.0003 |
| 219066_at   | PPCDC     | phosphopantothenoylcysteine decarboxylase                                   | 1.4549 | 0.0007 |
| 219072_at   | BCL7C     | B-cell CLL/lymphoma 7C                                                      | 0.6871 | 0.007  |
| 219083_at   | SHQ1      | SHQ1 homolog (S. cerevisiae)                                                | 0.921  | 0.006  |
| 219088_s_at | ZNF576    | zinc finger protein 576                                                     | 0.8639 | 0.008  |
| 219089_s_at | ZNF576    | zinc finger protein 576                                                     | 0.9666 | 0.0011 |
| 219091_s_at | MMRN2     | multimerin 2                                                                | 1.2108 | 0.0168 |
| 219106_s_at | KBTBD10   | kelch repeat and BTB (POZ) domain containing 10                             | 0.1597 | 0.0422 |
| 219110_at   | NOLA1     | nucleolar protein family A; member 1 (H/ACA small nucleolar RNPs)           | 0.4997 | 0.0081 |
| 219143_s_at | RPP25     | ribonuclease P/MRP 25kDa subunit                                            | 1.4369 | 0.0095 |
| 219149_x_at | DBR1      | debranching enzyme homolog 1 (S. cerevisiae)                                | 0.3986 | 0.0236 |
| 219159_s_at | SLAMF7    | SLAM family member 7                                                        | 0.3134 | 0.0461 |
| 219183_s_at | PSCD4     | pleckstrin homology; Sec7 and coiled-coil domains 4                         | 0.7139 | 0.0188 |
| 219191_s_at | BIN2      | bridging integrator 2                                                       | 0.5882 | 0.0041 |
| 219200_at   | FASTKD3   | FAST kinase domains 3                                                       | 0.778  | 0.0336 |
| 219207_at   | EDC3      | enhancer of mRNA decapping 3 homolog (S. cerevisiae)                        | 0.5046 | 0.0076 |
| 219210_s_at | RAB8B     | RAB8B; member RAS oncogene family                                           | 0.8726 | 0.0095 |
| 219211_at   | LOC727996 | similar to ubiquitin specific peptidase 18, ubiquitin specific peptidase 18 | 1.1524 | 0.0173 |
| 219229_at   | SLCO3A1   | solute carrier organic anion transporter family; member 3A1                 | 1.666  | 0      |
| 219235_s_at | PHACTR4   | phosphatase and actin regulator 4                                           | 0.654  | 0.033  |
| 219243_at   | GIMAP4    | GTPase; IMAP family member 4                                                | 0.8419 | 0.0298 |
| 219247_s_at | ZDHHC14   | zinc finger; DHHC-type containing 14                                        | 0.8006 | 0.0244 |
| 219252_s_at | GEMIN8    | gem (nuclear organelle) associated protein 8                                | 0.603  | 0.0222 |

|             |           |                                                                                          |        |        |
|-------------|-----------|------------------------------------------------------------------------------------------|--------|--------|
| 219258_at   | TIPIN     | TIMELESS interacting protein                                                             | 1.1318 | 0.0021 |
| 219261_at   | C7orf26   | chromosome 7 open reading frame 26                                                       | 0.529  | 0.0025 |
| 219270_at   | CHAC1     | ChaC; cation transport regulator homolog 1 (E. coli)                                     | 0.3896 | 0.037  |
| 219283_at   | C1GALT1C1 | C1GALT1-specific chaperone 1                                                             | 0.8997 | 0.0191 |
| 219288_at   | C3orf14   | chromosome 3 open reading frame 14                                                       | 1.8973 | 0.0136 |
| 219291_at   | DTWD1     | DTW domain containing 1                                                                  | 0.5473 | 0.0161 |
| 219297_at   | WDR44     | WD repeat domain 44                                                                      | 0.6343 | 0.0297 |
| 219321_at   | MPP5      | membrane protein; palmitoylated 5 (MAGUK p55 subfamily member 5)                         | 0.9862 | 0.0081 |
| 219334_s_at | OBFC2A    | oligonucleotide/oligosaccharide-binding fold containing 2A                               | 0.2846 | 0.0125 |
| 219335_at   | ARMCX5    | armadillo repeat containing; X-linked 5                                                  | 1.2972 | 0.0156 |
| 219354_at   | KLHL26    | kelch-like 26 (Drosophila)                                                               | 0.8    | 0.0127 |
| 219356_s_at | CHMP5     | chromatin modifying protein 5                                                            | 0.5134 | 0.0333 |
| 219384_s_at | ADAT1     | adenosine deaminase; tRNA-specific 1                                                     | 0.8234 | 0.0186 |
| 219385_at   | SLAMF8    | SLAM family member 8                                                                     | 0.9196 | 0.0069 |
| 219386_s_at | SLAMF8    | SLAM family member 8                                                                     | 1.4248 | 0.0222 |
| 219405_at   | TRIM68    | tripartite motif-containing 68                                                           | 0.8347 | 0.0283 |
| 219414_at   | CLSTN2    | calsyntenin 2                                                                            | 0.291  | 0.0428 |
| 219427_at   | FAT4      | FAT tumor suppressor homolog 4 (Drosophila)                                              | 0.7421 | 0.0046 |
| 219439_at   | C1GALT1   | core 1 synthase; glycoprotein-N-acetylgalactosamine 3-beta-galactosyltransferase; 1      | 1.5229 | 0.0007 |
| 219449_s_at | TMEM70    | transmembrane protein 70                                                                 | 0.7562 | 0.017  |
| 219456_s_at | RIN3      | Ras and Rab interactor 3                                                                 | 0.48   | 0.0093 |
| 219457_s_at | RIN3      | Ras and Rab interactor 3                                                                 | 1.1152 | 0.0014 |
| 219462_at   | TMEM53    | transmembrane protein 53                                                                 | 1.1493 | 0.0064 |
| 219481_at   | TTC13     | tetratricopeptide repeat domain 13                                                       | 0.5069 | 0.0462 |
| 219485_s_at | PSMD10    | proteasome (prosome; macropain) 26S subunit; non-ATPase; 10                              | 0.5121 | 0.019  |
| 219505_at   | CECR1     | cat eye syndrome chromosome region; candidate 1                                          | 2.462  | 0.0091 |
| 219508_at   | GCNT3     | glucosaminyl (N-acetyl) transferase 3; mucin type                                        | 1.4939 | 0.0126 |
| 219526_at   | C14orf169 | chromosome 14 open reading frame 169                                                     | 0.9007 | 0.0152 |
| 219529_at   | CLIC3     | chloride intracellular channel 3                                                         | 0.299  | 0.0359 |
| 219538_at   | WDR5B     | WD repeat domain 5B                                                                      | 1.287  | 0.0102 |
| 219540_at   | ZNF267    | zinc finger protein 267                                                                  | 1.01   | 0.0033 |
| 219546_at   | BMP2K     | BMP2 inducible kinase                                                                    | 0.9629 | 0.0158 |
| 219564_at   | KCNJ16    | potassium inwardly-rectifying channel; subfamily J; member 16                            | 0.8723 | 0.0157 |
| 219568_x_at | SOX18     | SRY (sex determining region Y)-box 18                                                    | 0.2888 | 0.0257 |
| 219574_at   | 1-Mar     | membrane-associated ring finger (C3HC4) 1                                                | 1.2487 | 0.0065 |
| 219575_s_at | COG8      | component of oligomeric golgi complex 8, peptide deformylase (mitochondrial)             | 0.7182 | 0.0076 |
| 219582_at   | OGFRL1    | opioid growth factor receptor-like 1                                                     | 0.5238 | 0.0306 |
| 219593_at   | SLC15A3   | solute carrier family 15; member 3                                                       | 1.1173 | 0.0447 |
| 219607_s_at | MS4A4A    | membrane-spanning 4-domains; subfamily A; member 4                                       | 1.845  | 0.0296 |
| 219609_at   | WDR25     | WD repeat domain 25                                                                      | 0.3021 | 0.0221 |
| 219618_at   | IRAK4     | interleukin-1 receptor-associated kinase 4                                               | 0.5551 | 0.0498 |
| 219623_at   | ACTR5     | ARP5 actin-related protein 5 homolog (yeast)                                             | 0.6206 | 0.021  |
| 219647_at   | POPDC2    | popeye domain containing 2                                                               | 0.2839 | 0.0475 |
| 219649_at   | ALG6      | asparagine-linked glycosylation 6 homolog (S. cerevisiae; alpha-1,3-glucosyltransferase) | 0.9098 | 0.0196 |
| 219654_at   | PTPLA     | protein tyrosine phosphatase-like (proline instead of catalytic arginine); member A      | 0.9826 | 0.0297 |
| 219661_at   | RANBP17   | RAN binding protein 17                                                                   | 0.5363 | 0.033  |
| 219666_at   | MS4A6A    | membrane-spanning 4-domains; subfamily A; member 6A                                      | 2.297  | 0.0023 |
| 219673_at   | MCM9      | minichromosome maintenance complex component 9                                           | 0.7717 | 0.0085 |
| 219675_s_at | UXS1      | UDP-glucuronate decarboxylase 1                                                          | 1.309  | 0.008  |
| 219709_x_at | C16orf24  | chromosome 16 open reading frame 24                                                      | 0.7705 | 0.0283 |
| 219715_s_at | TDP1      | tyrosyl-DNA phosphodiesterase 1                                                          | 0.7151 | 0.0028 |
| 219716_at   | APOL6     | apolipoprotein L; 6                                                                      | 0.5316 | 0.026  |
| 219725_at   | TREM2     | triggering receptor expressed on myeloid cells 2                                         | 1.4761 | 0.0313 |

|             |          |                                                                                        |        |        |
|-------------|----------|----------------------------------------------------------------------------------------|--------|--------|
| 219760_at   | LIN7B    | lin-7 homolog B ( <i>C. elegans</i> )                                                  | 0.6608 | 0.006  |
| 219777_at   | GIMAP6   | GTPase; IMAP family member 6                                                           | 1.0674 | 0.0268 |
| 219784_at   | FBXO31   | F-box protein 31                                                                       | 0.3658 | 0.0365 |
| 219788_at   | PILRA    | paired immunoglobulin-like type 2 receptor alpha                                       | 0.2676 | 0.0072 |
| 219797_at   | MGAT4A   | mannosyl (alpha-1;3-)-glycoprotein beta-1;4-N-acetylglucosaminyltransferase; isozyme A | 0.4878 | 0.001  |
| 219798_s_at | MEPCE    | methylphosphate capping enzyme                                                         | 0.7069 | 0.0326 |
| 219800_s_at | THNSL1   | threonine synthase-like 1 ( <i>S. cerevisiae</i> )                                     | 0.3859 | 0.0217 |
| 219806_s_at | C11orf75 | chromosome 11 open reading frame 75                                                    | 1.3944 | 0.0241 |
| 219815_at   | GAL3ST4  | galactose-3-O-sulfotransferase 4                                                       | 0.4568 | 0.014  |
| 219821_s_at | GFOD1    | glucose-fructose oxidoreductase domain containing 1                                    | 0.7702 | 0.018  |
| 219837_s_at | CYTL1    | cytokine-like 1                                                                        | 0.7525 | 0.0053 |
| 219864_s_at | RCAN3    | RCAN family member 3                                                                   | 0.1539 | 0.0215 |
| 219866_at   | CLIC5    | chloride intracellular channel 5                                                       | 0.2956 | 0.0195 |
| 219882_at   | TTLL7    | tubulin tyrosine ligase-like family; member 7                                          | 0.4891 | 0.0433 |
| 219892_at   | TM6SF1   | transmembrane 6 superfamily member 1                                                   | 0.8238 | 0.0136 |
| 219902_at   | BHMT2    | betaine-homocysteine methyltransferase 2                                               | 1.8095 | 0.026  |
| 219921_s_at | DOCK5    | dedicator of cytokinesis 5                                                             | 0.6492 | 0.0161 |
| 219926_at   | POPDC3   | popeye domain containing 3                                                             | 1.061  | 0.0114 |
| 219946_x_at | MYH14    | myosin; heavy chain 14                                                                 | 0.3624 | 0.035  |
| 219968_at   | ZNF589   | zinc finger protein 589                                                                | 0.7    | 0.0293 |
| 219994_at   | APBB1IP  | amyloid beta (A4) precursor protein-binding; family B; member 1 interacting protein    | 0.2182 | 0.0151 |
| 219999_at   | MAN2A2   | mannosidase; alpha; class 2A; member 2                                                 | 0.7644 | 0.0316 |
| 220005_at   | P2RY13   | purinergic receptor P2Y; G-protein coupled; 13                                         | 1.0284 | 0.0003 |
| 220021_at   | TMC7     | transmembrane channel-like 7                                                           | 0.221  | 0.0256 |
| 220032_at   | FLJ21986 | hypothetical protein FLJ21986                                                          | 0.7909 | 0.0286 |
| 220033_at   |          |                                                                                        | 0.5548 | 0.0207 |
| 220052_s_at | TINF2    | TERF1 (TRF1)-interacting nuclear factor 2                                              | 0.7194 | 0.0001 |
| 220055_at   | ZNF287   | zinc finger protein 287                                                                | 0.2517 | 0.037  |
| 220059_at   | STAP1    | signal transducing adaptor family member 1                                             | 0.1675 | 0.0143 |
| 220067_at   | SPTBN5   | spectrin; beta; non-erythrocytic 5                                                     | 0.1406 | 0.0393 |
| 220103_s_at | MRPS18C  | mitochondrial ribosomal protein S18C                                                   | 0.202  | 0.0088 |
| 220108_at   | GNA14    | guanine nucleotide binding protein (G protein); alpha 14                               | 0.5128 | 0.0313 |
| 220122_at   | MCTP1    | multiple C2 domains; transmembrane 1                                                   | 1.6298 | 0.0028 |
| 220136_s_at | CRYBA2   | crystallin; beta A2                                                                    | 0.1216 | 0.0292 |
| 220146_at   | TLR7     | toll-like receptor 7                                                                   | 1.0139 | 0.012  |
| 220150_s_at | C6orf60  | chromosome 6 open reading frame 60                                                     | 0.9941 | 0.0064 |
| 220162_s_at | CARD9    | caspase recruitment domain family; member 9                                            | 0.3202 | 0.0366 |
| 220173_at   | C14orf45 | chromosome 14 open reading frame 45                                                    | 0.5083 | 0.0318 |
| 220183_s_at | NUDT6    | nudix (nucleoside diphosphate linked moiety X)-type motif 6                            | 0.9214 | 0.0109 |
| 220189_s_at | MGAT4B   | mannosyl (alpha-1;3-)-glycoprotein beta-1;4-N-acetylglucosaminyltransferase; isozyme B | 1.0418 | 0.0499 |
| 220229_s_at | AP4E1    | adaptor-related protein complex 4; epsilon 1 subunit                                   | 0.1458 | 0.0226 |
| 220258_s_at | WDR79    | WD repeat domain 79                                                                    | 0.2503 | 0.0399 |
| 220261_s_at | ZDHHC4   | zinc finger; DHHC-type containing 4                                                    | 0.7538 | 0.0279 |
| 220307_at   | CD244    | CD244 molecule; natural killer cell receptor 2B4                                       | 0.2244 | 0.0125 |
| 220330_s_at | SAMSN1   | SAM domain; SH3 domain and nuclear localization signals 1                              | 1.542  | 0.0127 |
| 220358_at   | SNFT     | Jun dimerization protein p21SNFT                                                       | 0.5854 | 0.0134 |
| 220364_at   | FLJ11235 | hypothetical protein FLJ11235                                                          | 0.3559 | 0.0096 |
| 220416_at   | ATP8B4   | ATPase; Class I; type 8B; member 4                                                     | 0.9085 | 0.0077 |
| 220440_at   | LGALS13  | lectin; galactoside-binding; soluble; 13 (galectin 13)                                 | 0.1244 | 0.0209 |
| 220448_at   | KCNK12   | potassium channel; subfamily K; member 12                                              | 1.2644 | 0.0339 |
| 220470_at   | BET1L    | blocked early in transport 1 homolog ( <i>S. cerevisiae</i> )-like                     | 0.2378 | 0.0394 |
| 220474_at   | SLC25A21 | solute carrier family 25 (mitochondrial oxodicarboxylate carrier); member 21           | 0.281  | 0.0385 |
| 220491_at   | HAMP     | hepcidin antimicrobial peptide                                                         | 0.7295 | 0.0358 |
| 220535_at   | FAM90A1  | family with sequence similarity 90; member A1                                          | 0.2445 | 0.0002 |
| 220569_at   |          |                                                                                        | 0.1242 | 0.0482 |
| 220588_at   | BCAS4    | breast carcinoma amplified sequence 4                                                  | 0.4269 | 0.0279 |

|             |           |                                                                                                                                |        |        |
|-------------|-----------|--------------------------------------------------------------------------------------------------------------------------------|--------|--------|
| 220643_s_at | FAIM      | Fas apoptotic inhibitory molecule                                                                                              | 1.1095 | 0.0047 |
| 220741_s_at | PPA2      | pyrophosphatase (inorganic) 2                                                                                                  | 0.6021 | 0.0081 |
| 220753_s_at | CRYL1     | crystallin; lambda 1                                                                                                           | 1.0957 | 0.0099 |
| 220756_s_at | GPR172B   | G protein-coupled receptor 172B                                                                                                | 0.2129 | 0.0034 |
| 220789_s_at | TBRG4     | transforming growth factor beta regulator 4                                                                                    | 0.5    | 0.0058 |
| 220815_at   | CTNNA3    | catenin (cadherin-associated protein); alpha 3                                                                                 | 0.1123 | 0.0171 |
| 220832_at   | TLR8      | toll-like receptor 8                                                                                                           | 0.2195 | 0.0041 |
| 220929_at   | GALNT8    | UDP-N-acetyl-alpha-D-galactosamine:polypeptide N-acetylgalactosaminyltransferase 8 (GalNAc-T8)                                 | 0.1557 | 0.0146 |
| 220953_s_at | MTMR12    | myotubularin related protein 12                                                                                                | 0.3378 | 0.0108 |
| 220961_s_at | TBRG4     | transforming growth factor beta regulator 4                                                                                    | 0.4907 | 0.042  |
| 220980_s_at | ADPGK     | ADP-dependent glucokinase                                                                                                      | 0.584  | 0.0022 |
| 220987_s_at | C11orf17  | NUAK family; SNF1-like kinase; 2, chromosome 11 open reading frame 17                                                          | 0.8557 | 0.0313 |
| 220994_s_at | STXBP6    | syntaxin binding protein 6 (amisyn)                                                                                            | 1.1342 | 0.0075 |
| 221019_s_at | COLEC12   | collectin sub-family member 12                                                                                                 | 1.6903 | 0.0421 |
| 221021_s_at | CTNBL1    | catenin; beta like 1                                                                                                           | 0.3316 | 0.0458 |
| 221022_s_at | PMFBP1    | polyamine modulated factor 1 binding protein 1                                                                                 | 0.1692 | 0.0375 |
| 221027_s_at | PLA2G12A  | phospholipase A2; group X1IA                                                                                                   | 1.0275 | 0.0154 |
| 221029_s_at | WNT5B     | wingless-type MMTV integration site family; member 5B                                                                          | 0.732  | 0.0299 |
| 221036_s_at | APH1B     | anterior pharynx defective 1 homolog B (C. elegans)                                                                            | 0.7255 | 0.037  |
| 221041_s_at | SLC17A5   | solute carrier family 17 (anion/sugar transporter); member 5                                                                   | 1.6496 | 0.0063 |
| 221098_x_at | UTP14A    | UTP14; U3 small nucleolar ribonucleoprotein; homolog A (yeast)                                                                 | 0.264  | 0.0011 |
| 221122_at   | HRASLS2   | HRAS-like suppressor 2                                                                                                         | 0.3467 | 0.0029 |
| 221135_s_at | ASTE1     | asteroid homolog 1 (Drosophila)                                                                                                | 1.0881 | 0.008  |
| 221156_x_at | CCPG1     | cell cycle progression 1                                                                                                       | 0.8277 | 0.0096 |
| 221181_at   | LOC642452 | hypothetical LOC642452, hypothetical protein LOC651791                                                                         | 0.5293 | 0.0132 |
| 221218_s_at | TPK1      | thiamin pyrophosphokinase 1                                                                                                    | 2.724  | 0      |
| 221223_x_at | CISH      | cytokine inducible SH2-containing protein                                                                                      | 0.6823 | 0.0199 |
| 221224_s_at | DCAKD     | dephospho-CoA kinase domain containing                                                                                         | 0.181  | 0.0058 |
| 221227_x_at | COQ3      | coenzyme Q3 homolog; methyltransferase (S. cerevisiae)                                                                         | 0.4757 | 0.0122 |
| 221232_s_at | ANKRD2    | ankyrin repeat domain 2 (stretch responsive muscle)                                                                            | 0.2548 | 0.0434 |
| 221238_at   | NSBP1     | nucleosomal binding protein 1                                                                                                  | 0.4017 | 0.0375 |
| 221241_s_at | BCL2L14   | BCL2-like 14 (apoptosis facilitator)                                                                                           | 0.1157 | 0.0326 |
| 221265_s_at | C15orf44  | chromosome 15 open reading frame 44                                                                                            | 0.6184 | 0.0024 |
| 221297_at   | GPRC5D    | G protein-coupled receptor; family C; group 5; member D                                                                        | 0.119  | 0.0467 |
| 221304_at   | UGT1A10   | UDP glucuronosyltransferase 1 family; polypeptide A10                                                                          | 0.1681 | 0.0246 |
| 221314_at   | GDF9      | growth differentiation factor 9                                                                                                | 0.2463 | 0.0205 |
| 221319_at   | PCDHB8    | protocadherin beta 8                                                                                                           | 0.2026 | 0.0293 |
| 221320_at   | BCL2L10   | BCL2-like 10 (apoptosis facilitator)                                                                                           | 0.1626 | 0.035  |
| 221345_at   | FFAR2     | free fatty acid receptor 2                                                                                                     | 0.1339 | 0.0342 |
| 221410_x_at | PCDHB3    | protocadherin beta 3                                                                                                           | 0.3822 | 0.0092 |
| 221413_at   | KCNAB3    | potassium voltage-gated channel; shaker-related subfamily; beta member 3                                                       | 0.119  | 0.0151 |
| 221434_s_at | C14orf156 | chromosome 14 open reading frame 156                                                                                           | 0.6783 | 0.0147 |
| 221466_at   | P2RY4     | pyrimidinergic receptor P2Y; G-protein coupled; 4                                                                              | 0.1189 | 0.0141 |
| 221511_x_at | CCPG1     | cell cycle progression 1                                                                                                       | 1.4109 | 0.0082 |
| 221513_s_at | UTP14A    | UTP14; U3 small nucleolar ribonucleoprotein; homolog A (yeast); UTP14; U3 small nucleolar ribonucleoprotein; homolog C (yeast) | 1.1039 | 0.0071 |
| 221514_at   | UTP14A    | UTP14; U3 small nucleolar ribonucleoprotein; homolog A (yeast)                                                                 | 1.3054 | 0.0008 |
| 221535_at   | LSG1      | large subunit GTPase 1 homolog (S. cerevisiae)                                                                                 | 1.0146 | 0.0037 |
| 221536_s_at | LSG1      | large subunit GTPase 1 homolog (S. cerevisiae)                                                                                 | 1.1698 | 0      |
| 221578_at   | RASSF4    | Ras association (RalGDS/AF-6) domain family 4                                                                                  | 0.1822 | 0.0265 |
| 221581_s_at | LAT2      | linker for activation of T cells family; member 2                                                                              | 0.7581 | 0.002  |
| 221601_s_at | FAIM3     | Fas apoptotic inhibitory molecule 3                                                                                            | 0.5266 | 0.0363 |
| 221602_s_at | FAIM3     | Fas apoptotic inhibitory molecule 3                                                                                            | 0.1588 | 0.0379 |

|             |           |                                                                                                      |        |        |
|-------------|-----------|------------------------------------------------------------------------------------------------------|--------|--------|
| 221606_s_at | NSBP1     | nucleosomal binding protein 1                                                                        | 1.3623 | 0.0271 |
| 221620_s_at | APOO      | apolipoprotein O                                                                                     | 1.2057 | 0.0016 |
| 221623_at   | BCAN      | brevican                                                                                             | 0.1006 | 0.0489 |
| 221628_s_at | N-PAC     | cytokine-like nuclear factor n-pac                                                                   | 0.4332 | 0.0183 |
| 221651_x_at | IGKC      | immunoglobulin kappa constant, immunoglobulin kappa variable 1-5, immunoglobulin kappa variable 2-24 | 1.9826 | 0.0268 |
| 221671_x_at | IGKC      | immunoglobulin kappa constant, immunoglobulin kappa variable 1-5, immunoglobulin kappa variable 2-24 | 2.0525 | 0.0216 |
| 221698_s_at | CLECT7A   | C-type lectin domain family 7; member A                                                              | 1.3466 | 0.0158 |
| 221702_s_at | TM2D3     | TM2 domain containing 3                                                                              | 0.6065 | 0.0474 |
| 221722_x_at | LZTS1     | leucine zipper; putative tumor suppressor 1                                                          | 0.1411 | 0.0156 |
| 221728_x_at | XIST      | X (inactive)-specific transcript                                                                     | 3.1659 | 0.047  |
| 221746_at   | UBL4A     | ubiquitin-like 4A                                                                                    | 0.7152 | 0      |
| 221756_at   | PIK3IP1   | phosphoinositide-3-kinase interacting protein 1                                                      | 1.3152 | 0.0261 |
| 221757_at   | PIK3IP1   | phosphoinositide-3-kinase interacting protein 1                                                      | 1.2027 | 0.0023 |
| 221776_s_at | BRD7      | bromodomain containing 7                                                                             | 0.706  | 0.003  |
| 221787_at   | C6orf120  | chromosome 6 open reading frame 120                                                                  | 0.7026 | 0.0415 |
| 221861_at   |           | MRNA; cDNA DKFZp762M127 (from clone DKFZp762M127)                                                    | 0.7097 | 0.0075 |
| 221866_at   | TFEB      | transcription factor EB                                                                              | 0.3287 | 0.0464 |
| 221875_x_at | HLA-F     | major histocompatibility complex; class I; F                                                         | 0.8772 | 0.0024 |
| 221880_s_at | LOC400451 | hypothetical gene supported by AK075564; BC060873                                                    | 0.337  | 0.0403 |
| 221893_s_at | ADCK2     | aarF domain containing kinase 2                                                                      | 1.3432 | 0.0004 |
| 221894_at   | ADCK2     | aarF domain containing kinase 2                                                                      | 0.5014 | 0.0094 |
| 221903_s_at | CYLD      | cylindromatosis (turban tumor syndrome)                                                              | 0.8161 | 0.0129 |
| 221907_at   | C14orf172 | chromosome 14 open reading frame 172                                                                 | 0.2851 | 0.048  |
| 221927_s_at | ABHD11    | abhydrolase domain containing 11                                                                     | 0.9586 | 0.0325 |
| 221933_at   | NLGN4X    | neuroligin 4; X-linked                                                                               | 1.2755 | 0.0175 |
| 221940_at   | RPUSD2    | RNA pseudouridylylate synthase domain containing 2                                                   | 0.4086 | 0.0188 |
| 221978_at   | HLA-F     | major histocompatibility complex; class I; F                                                         | 0.7088 | 0.0298 |
| 222011_s_at | TCP1      | t-complex 1                                                                                          | 0.7094 | 0.0342 |
| 222061_at   | CD58      | CD58 molecule                                                                                        | 0.2409 | 0.0069 |
| 222111_at   |           | CDNA clone IMAGE:4794011                                                                             | 1.1024 | 0.0052 |
| 222115_x_at | N-PAC     | cytokine-like nuclear factor n-pac                                                                   | 0.3552 | 0.0293 |
| 222129_at   | FAM134A   | Family with sequence similarity 134; member A                                                        | 0.6429 | 0.0169 |
| 222130_s_at | FTSJ2     | FtsJ homolog 2 (E. coli)                                                                             | 0.6325 | 0.008  |
| 222143_s_at | MTMR14    | myotubularin related protein 14                                                                      | 0.8847 | 0.0011 |
| 222156_x_at | CCPG1     | cell cycle progression 1                                                                             | 1.4522 | 0.0015 |
| 222163_s_at | SPATA5L1  | spermatogenesis associated 5-like 1                                                                  | 0.9053 | 0.0092 |
| 222173_s_at | TBC1D2    | TBC1 domain family; member 2                                                                         | 0.4262 | 0.0231 |
| 222218_s_at | PILRA     | paired immunoglobulin-like type 2 receptor alpha                                                     | 0.6189 | 0.0461 |
| 222225_at   | FLJ45055  | 60S ribosomal pseudogene                                                                             | 0.2821 | 0.0378 |
| 222269_at   | APOOL     | apolipoprotein O-like                                                                                | 0.6488 | 0.0058 |
| 222271_at   |           |                                                                                                      | 0.3291 | 0.0016 |
| 222277_at   | PCOTH     | prostate collagen triple helix                                                                       | 0.256  | 0.0211 |
| 222294_s_at |           | CDNA clone IMAGE:5745639                                                                             | 1.1759 | 0.0296 |
| 222296_at   |           | Homo sapiens; clone IMAGE:3921647; mRNA                                                              | 0.9764 | 0.0221 |
| 222460_s_at | NIP30     | NEFA-interacting nuclear protein NIP30                                                               | 0.4581 | 0.0433 |
| 222465_at   | C15orf15  | chromosome 15 open reading frame 15, similar to ribosomal protein L24-like                           | 0.4616 | 0.0104 |
| 222498_at   | AZI2      | 5-azacytidine induced 2                                                                              | 0.4582 | 0.0047 |
| 222500_at   | PPIL1     | peptidylprolyl isomerase (cyclophilin)-like 1                                                        | 0.7869 | 0.0102 |
| 222503_s_at | WDR41     | WD repeat domain 41                                                                                  | 0.7016 | 0.0429 |
| 222512_at   | NUB1      | negative regulator of ubiquitin-like proteins 1                                                      | 0.6082 | 0.0196 |
| 222526_at   | GATAD2A   | GATA zinc finger domain containing 2A                                                                | 0.8489 | 0.0027 |
| 222530_s_at | MKKS      | McKusick-Kaufman syndrome                                                                            | 0.8173 | 0.0036 |
| 222561_at   | LANCL2    | LanC lantibiotic synthetase component C-like 2 (bacterial)                                           | 0.8585 | 0.0268 |
| 222582_at   | PRKAG2    | protein kinase; AMP-activated; gamma 2 non-catalytic subunit                                         | 0.6309 | 0.0093 |
| 222592_s_at | ACSL5     | acyl-CoA synthetase long-chain family member 5                                                       | 0.4741 | 0.0423 |
| 222615_s_at | PRKRIP1   | PRKR interacting protein 1 (IL11 inducible)                                                          | 0.8629 | 0.0101 |

|             |           |                                                                                                                 |        |        |
|-------------|-----------|-----------------------------------------------------------------------------------------------------------------|--------|--------|
| 222631_at   | PI4K2B    | phosphatidylinositol 4-kinase type 2 beta                                                                       | 0.973  | 0.0096 |
| 222636_at   | MED28     | mediator complex subunit 28                                                                                     | 0.6427 | 0.05   |
| 222647_at   | SLC35C1   | solute carrier family 35; member C1                                                                             | 0.331  | 0.0461 |
| 222652_s_at | N-PAC     | cytokine-like nuclear factor n-pac                                                                              | 0.9871 | 0.0012 |
| 222659_at   | IPO11     | importin 11                                                                                                     | 0.7288 | 0.0414 |
| 222682_s_at | C5orf3    | chromosome 5 open reading frame 3                                                                               | 0.9237 | 0.0113 |
| 222701_s_at | CHCHD7    | coiled-coil-helix-coiled-coil-helix domain containing 7                                                         | 1.257  | 0.0097 |
| 222714_s_at | LACTB2    | lactamase; beta 2                                                                                               | 0.9805 | 0.0316 |
| 222723_at   | LOC727901 | similar to von Willebrand factor A domain-related protein isoform 1                                             | 0.3041 | 0.0063 |
| 222741_s_at | C6orf64   | chromosome 6 open reading frame 64                                                                              | 0.8092 | 0.037  |
| 222744_s_at | TMLHE     | trimethyllysine hydroxylase; epsilon                                                                            | 0.6713 | 0.0493 |
| 222750_s_at | SRD5A2L   | steroid 5 alpha-reductase 2-like                                                                                | 1.7091 | 0.0028 |
| 222753_s_at | SPCS3     | signal peptidase complex subunit 3 homolog (S. cerevisiae)                                                      | 0.9045 | 0.0137 |
| 222754_at   | TRNT1     | tRNA nucleotidyl transferase; CCA-adding; 1                                                                     | 0.6562 | 0.0219 |
| 222756_s_at | ARRB1     | arrestin; beta 1                                                                                                | 0.7207 | 0.0035 |
| 222783_s_at | SMOC1     | SPARC related modular calcium binding 1                                                                         | 0.1621 | 0.0498 |
| 222786_at   | CHST12    | carbohydrate (chondroitin 4) sulfotransferase 12                                                                | 0.7145 | 0.003  |
| 222799_at   | WDR91     | WD repeat domain 91                                                                                             | 0.6513 | 0.0002 |
| 222808_at   | ALG13     | asparagine-linked glycosylation 13 homolog (S. cerevisiae)                                                      | 0.926  | 0.0048 |
| 222815_at   | RNF12     | ring finger protein 12                                                                                          | 1.0104 | 0.019  |
| 222817_at   | HSD3B7    | hydroxy-delta-5-steroid dehydrogenase; 3 beta- and steroid delta-isomerase 7                                    | 1.3892 | 0.0401 |
| 222838_at   | SLAMF7    | SLAM family member 7                                                                                            | 0.9673 | 0.0454 |
| 222858_s_at | DAPP1     | dual adaptor of phosphotyrosine and 3-phosphoinositides                                                         | 0.269  | 0.0082 |
| 222859_s_at | DAPP1     | dual adaptor of phosphotyrosine and 3-phosphoinositides                                                         | 0.342  | 0.0041 |
| 222868_s_at | IL18BP    | interleukin 18 binding protein                                                                                  | 1.1713 | 0.0051 |
| 222876_s_at | CENTA2    | centaurin; alpha 2                                                                                              | 0.7156 | 0.0315 |
| 222886_at   |           |                                                                                                                 | 0.1845 | 0.0284 |
| 222903_s_at | CPEB1     | cytoplasmic polyadenylation element binding protein 1                                                           | 0.2125 | 0.0189 |
| 222912_at   | ARRB1     | arrestin; beta 1                                                                                                | 0.9671 | 0.0153 |
| 222952_s_at | TLR7      | toll-like receptor 7                                                                                            | 0.1469 | 0.0321 |
| 222996_s_at | CXXC5     | CXXC finger 5                                                                                                   | 1.8279 | 0.043  |
| 223004_s_at | C3orf1    | chromosome 3 open reading frame 1                                                                               | 0.4374 | 0.0184 |
| 223037_at   | PDZD11    | PDZ domain containing 11                                                                                        | 0.8778 | 0.0032 |
| 223041_at   | CD99L2    | CD99 molecule-like 2                                                                                            | 0.9487 | 0.0328 |
| 223043_at   | TMEM85    | transmembrane protein 85                                                                                        | 0.528  | 0.0408 |
| 223044_at   | SLC40A1   | solute carrier family 40 (iron-regulated transporter); member 1                                                 | 0.8202 | 0.0489 |
| 223060_at   | C14orf119 | chromosome 14 open reading frame 119                                                                            | 0.584  | 0.0263 |
| 223065_s_at | STARD3NL  | STARD3 N-terminal like                                                                                          | 0.4626 | 0.0222 |
| 223076_s_at | NSUN2     | NOL1/NOP2/Sun domain family; member 2                                                                           | 0.4434 | 0.0462 |
| 223084_s_at | CCNDBP1   | cyclin D-type binding-protein 1                                                                                 | 0.8351 | 0.0368 |
| 223087_at   | ECHDC1    | enoyl Coenzyme A hydratase domain containing 1                                                                  | 0.6555 | 0.0285 |
| 223094_s_at | ANKH      | ankylosis; progressive homolog (mouse)                                                                          | 0.4239 | 0.047  |
| 223112_s_at | NDUFB10   | NADH dehydrogenase (ubiquinone) 1 beta subcomplex; 10; 22kDa                                                    | 0.6282 | 0.0042 |
| 223162_s_at | KIAA1147  | KIAA1147                                                                                                        | 0.6939 | 0.0343 |
| 223174_at   | BTBD10    | BTB (POZ) domain containing 10                                                                                  | 0.5526 | 0.035  |
| 223179_at   | YPEL3     | yippee-like 3 (Drosophila)                                                                                      | 0.8801 | 0.0334 |
| 223191_at   | C14orf112 | chromosome 14 open reading frame 112                                                                            | 0.6268 | 0.0001 |
| 223197_s_at | SMARCD1   | SWI/SNF-related; matrix-associated actin-dependent regulator of chromatin; subfamily a; containing DEAD/H box 1 | 0.7349 | 0.0071 |
| 223200_s_at | LSG1      | large subunit GTPase 1 homolog (S. cerevisiae)                                                                  | 0.6906 | 0.0367 |
| 223210_at   | CHURC1    | churchill domain containing 1                                                                                   | 0.6246 | 0.0134 |
| 223215_s_at | C14orf100 | chromosome 14 open reading frame 100                                                                            | 0.5504 | 0.0061 |
| 223220_s_at | PARP9     | poly (ADP-ribose) polymerase family; member 9                                                                   | 1.3998 | 0.0027 |

|             |           |                                                                                                                                                                                                                                                                                                                                                                                       |        |        |
|-------------|-----------|---------------------------------------------------------------------------------------------------------------------------------------------------------------------------------------------------------------------------------------------------------------------------------------------------------------------------------------------------------------------------------------|--------|--------|
| 223221_at   | SCO1      | SCO cytochrome oxidase deficient homolog 1 (yeast)                                                                                                                                                                                                                                                                                                                                    | 0.6816 | 0.0374 |
| 223222_at   | SLC25A19  | solute carrier family 25 (mitochondrial thiamine pyrophosphate carrier); member 19                                                                                                                                                                                                                                                                                                    | 0.8646 | 0.0032 |
| 223241_at   | SNX8      | sorting nexin 8                                                                                                                                                                                                                                                                                                                                                                       | 0.6992 | 0.0459 |
| 223244_s_at | NDUFA12   | NADH dehydrogenase (ubiquinone) 1 alpha subcomplex; 12                                                                                                                                                                                                                                                                                                                                | 0.2477 | 0.0345 |
| 223247_at   | MED10     | mediator complex subunit 10                                                                                                                                                                                                                                                                                                                                                           | 0.9117 | 0.0229 |
| 223278_at   | GJB2      | gap junction protein; beta 2; 26kDa                                                                                                                                                                                                                                                                                                                                                   | 0.5513 | 0.0351 |
| 223280_x_at | MS4A6A    | membrane-spanning 4-domains; subfamily A; member 6A                                                                                                                                                                                                                                                                                                                                   | 2.3078 | 0.0002 |
| 223286_at   | C17orf81  | chromosome 17 open reading frame 81                                                                                                                                                                                                                                                                                                                                                   | 0.6224 | 0.0381 |
| 223298_s_at | NT5C3     | 5'-nucleotidase; cytosolic III                                                                                                                                                                                                                                                                                                                                                        | 0.6665 | 0.0083 |
| 223299_at   | SEC11C    | SEC11 homolog C (S. cerevisiae)                                                                                                                                                                                                                                                                                                                                                       | 0.9887 | 0.0149 |
| 223325_at   | TXNDC11   | thioredoxin domain containing 11                                                                                                                                                                                                                                                                                                                                                      | 0.5998 | 0.0081 |
| 223343_at   | MS4A7     | membrane-spanning 4-domains; subfamily A; member 7                                                                                                                                                                                                                                                                                                                                    | 1.7602 | 0.0153 |
| 223344_s_at | MS4A7     | membrane-spanning 4-domains; subfamily A; member 7                                                                                                                                                                                                                                                                                                                                    | 1.6647 | 0.0047 |
| 223345_at   | HDAC8     | histone deacetylase 8                                                                                                                                                                                                                                                                                                                                                                 | 0.8526 | 0.0174 |
| 223346_at   | VPS18     | vacuolar protein sorting 18 homolog (S. cerevisiae)                                                                                                                                                                                                                                                                                                                                   | 0.9781 | 0.0027 |
| 223358_s_at |           | CDNA FLJ33024 fis; clone THYMU1000532; moderately similar to HIGH-AFFINITY CAMP-SPECIFIC 3';5'-CYCLIC PHOSPHODIESTERASE (EC 3.1.4.17)                                                                                                                                                                                                                                                 | 0.8638 | 0.0065 |
| 223363_at   | PSMG3     | proteasome (prosome; macropain) assembly chaperone 3                                                                                                                                                                                                                                                                                                                                  | 0.7103 | 0.0016 |
| 223364_s_at | DHX37     | DEAH (Asp-Glu-Ala-His) box polypeptide 37                                                                                                                                                                                                                                                                                                                                             | 0.4843 | 0.029  |
| 223367_at   | WBSCR18   | Williams Beuren syndrome chromosome region 18                                                                                                                                                                                                                                                                                                                                         | 0.8352 | 0.0337 |
| 223373_s_at | PLA2G12A  | phospholipase A2; group X1IA                                                                                                                                                                                                                                                                                                                                                          | 1.6132 | 0.0028 |
| 223376_s_at | BRI3      | brain protein I3                                                                                                                                                                                                                                                                                                                                                                      | 0.6028 | 0.0154 |
| 223377_x_at | CISH      | cytokine inducible SH2-containing protein                                                                                                                                                                                                                                                                                                                                             | 0.896  | 0.0147 |
| 223382_s_at | ZNRF1     | zinc and ring finger 1                                                                                                                                                                                                                                                                                                                                                                | 0.9296 | 0.0027 |
| 223383_at   | ZNRF1     | zinc and ring finger 1                                                                                                                                                                                                                                                                                                                                                                | 1.3778 | 0.0017 |
| 223396_at   | TMEM60    | transmembrane protein 60                                                                                                                                                                                                                                                                                                                                                              | 0.3913 | 0.047  |
| 223397_s_at | NIP7      | nuclear import 7 homolog (S. cerevisiae)                                                                                                                                                                                                                                                                                                                                              | 0.6425 | 0.0403 |
| 223405_at   | NPL       | N-acetylneuraminate pyruvate lyase (dihydrodipicolinate synthase)                                                                                                                                                                                                                                                                                                                     | 0.875  | 0.0449 |
| 223414_s_at | LYAR      | Ly1 antibody reactive homolog (mouse)                                                                                                                                                                                                                                                                                                                                                 | 0.2908 | 0.0363 |
| 223420_at   | DNAJC14   | DnaJ (Hsp40) homolog; subfamily C; member 14                                                                                                                                                                                                                                                                                                                                          | 0.7239 | 0.001  |
| 223435_s_at | PCDHA1    | protocadherin alpha 1, protocadherin alpha 10, protocadherin alpha 11, protocadherin alpha 12, protocadherin alpha 13, protocadherin alpha 2, protocadherin alpha 3, protocadherin alpha 4, protocadherin alpha 5, protocadherin alpha 6, protocadherin alpha 7, protocadherin alpha 8, protocadherin alpha 9, protocadherin alpha subfamily C; 1, protocadherin alpha subfamily C; 2 | 2.6323 | 0.0216 |
| 223439_at   | NKAP      | NFKB activating protein                                                                                                                                                                                                                                                                                                                                                               | 1.0048 | 0.0025 |
| 223441_at   | SLC17A5   | solute carrier family 17 (anion/sugar transporter); member 5                                                                                                                                                                                                                                                                                                                          | 1.4819 | 0.0016 |
| 223445_at   | DTNBP1    | dystrobrevin binding protein 1                                                                                                                                                                                                                                                                                                                                                        | 0.6253 | 0.0073 |
| 223484_at   | C15orf48  | chromosome 15 open reading frame 48                                                                                                                                                                                                                                                                                                                                                   | 1.8154 | 0.044  |
| 223515_s_at | COQ3      | coenzyme Q3 homolog; methyltransferase (S. cerevisiae)                                                                                                                                                                                                                                                                                                                                | 0.7089 | 0.023  |
| 223518_at   | DFFA      | DNA fragmentation factor; 45kDa; alpha polypeptide                                                                                                                                                                                                                                                                                                                                    | 0.6191 | 0.0182 |
| 223541_at   | HAS3      | hyaluronan synthase 3                                                                                                                                                                                                                                                                                                                                                                 | 0.1547 | 0.0093 |
| 223551_at   | PKIB      | protein kinase (cAMP-dependent; catalytic) inhibitor beta                                                                                                                                                                                                                                                                                                                             | 2.5302 | 0.0003 |
| 223565_at   | MGC29506  | hypothetical protein MGC29506                                                                                                                                                                                                                                                                                                                                                         | 0.4858 | 0.0417 |
| 223573_s_at | PPP2R2C   | protein phosphatase 2 (formerly 2A); regulatory subunit B; gamma isoform                                                                                                                                                                                                                                                                                                              | 0.6977 | 0.0099 |
| 223574_x_at | PPP2R2C   | protein phosphatase 2 (formerly 2A); regulatory subunit B; gamma isoform                                                                                                                                                                                                                                                                                                              | 2.1023 | 0.0099 |
| 223580_at   | SPSB2     | splA/ryanodine receptor domain and SOCS box containing 2                                                                                                                                                                                                                                                                                                                              | 1.2559 | 0.0003 |
| 223583_at   | TNFAIP8L2 | tumor necrosis factor; alpha-induced protein 8-like 2                                                                                                                                                                                                                                                                                                                                 | 0.4535 | 0.0118 |



|             |              |                                                                                                                                             |        |        |
|-------------|--------------|---------------------------------------------------------------------------------------------------------------------------------------------|--------|--------|
| 223596_at   | SLC12A6      | solute carrier family 12 (potassium/chloride transporters); member 6                                                                        | 0.3772 | 0.0252 |
| 223610_at   | SEMA5B       | sema domain; seven thrombospondin repeats (type 1 and type 1-like); transmembrane domain (TM) and short cytoplasmic domain; (semaphorin) 5B | 0.2174 | 0.0481 |
| 223615_at   | ABI3         | ABI gene family; member 3                                                                                                                   | 0.3381 | 0.0393 |
| 223620_at   | GPR34        | G protein-coupled receptor 34                                                                                                               | 2.2456 | 0.0003 |
| 223636_at   | ZMYND12      | zinc finger; MYND-type containing 12                                                                                                        | 0.6372 | 0.01   |
| 223640_at   | HCST         | hematopoietic cell signal transducer                                                                                                        | 1.2724 | 0.005  |
| 223659_at   | TMPRSS13     | transmembrane protease; serine 13                                                                                                           | 0.1321 | 0.0137 |
| 223673_at   | RFX4         | regulatory factor X; 4 (influences HLA class II expression)                                                                                 | 0.2252 | 0.0496 |
| 223677_at   | ATG10        | ATG10 autophagy related 10 homolog (S. cerevisiae)                                                                                          | 0.9653 | 0.0063 |
| 223686_at   | TPK1         | thiamin pyrophosphokinase 1                                                                                                                 | 1.7822 | 0      |
| 223688_s_at | LY6K         | lymphocyte antigen 6 complex; locus K                                                                                                       | 0.2636 | 0.0275 |
| 223700_at   | MND1         | meiotic nuclear divisions 1 homolog (S. cerevisiae)                                                                                         | 1.4063 | 0.0179 |
| 223709_s_at | WNT10A       | wingless-type MMTV integration site family; member 10A                                                                                      | 0.1397 | 0.0479 |
| 223720_at   | SPINK7       | serine peptidase inhibitor; Kazal type 7 (putative)                                                                                         | 0.3084 | 0.0051 |
| 223728_at   | MGC16385     | hypothetical protein MGC16385                                                                                                               | 0.9859 | 0.001  |
| 223743_s_at | MRPL4        | mitochondrial ribosomal protein L4                                                                                                          | 0.754  | 0.0189 |
| 223750_s_at | TLR10        | toll-like receptor 10                                                                                                                       | 0.1796 | 0.0098 |
| 223767_at   | GPR84        | G protein-coupled receptor 84                                                                                                               | 0.2323 | 0.0087 |
| 223776_x_at | TINF2        | TERF1 (TRF1)-interacting nuclear factor 2                                                                                                   | 0.8497 | 0.0002 |
| 223786_at   | CHST6        | carbohydrate (N-acetylglucosamine 6-O) sulfotransferase 6                                                                                   | 2.3996 | 0.0016 |
| 223809_at   | RGS18        | regulator of G-protein signaling 18                                                                                                         | 0.7789 | 0.0097 |
| 223833_at   | WDR55        | WD repeat domain 55                                                                                                                         | 0.3585 | 0.0194 |
| 223834_at   | CD274        | CD274 molecule                                                                                                                              | 0.1943 | 0.0232 |
| 223856_at   | AKR1CL2      | aldo-keto reductase family 1; member C-like 2                                                                                               | 0.5347 | 0.0478 |
| 223857_x_at | TMEM85       | transmembrane protein 85                                                                                                                    | 0.4961 | 0.0432 |
| 223866_at   | ARMC2        | armadillo repeat containing 2                                                                                                               | 0.25   | 0.0032 |
| 223880_x_at | C20orf24     | chromosome 20 open reading frame 24                                                                                                         | 0.671  | 0.0018 |
| 223889_at   |              |                                                                                                                                             | 0.15   | 0.005  |
| 223909_s_at | HDAC8        | histone deacetylase 8                                                                                                                       | 0.7173 | 0.0056 |
| 223922_x_at | MS4A6A       | membrane-spanning 4-domains; subfamily A; member 6A                                                                                         | 1.8945 | 0.0005 |
| 223964_x_at |              |                                                                                                                                             | 0.6102 | 0.0247 |
| 224009_x_at | DHRS9        | dehydrogenase/reductase (SDR family) member 9                                                                                               | 0.5515 | 0.0251 |
| 224015_s_at | MRPS25       | mitochondrial ribosomal protein S25                                                                                                         | 0.8075 | 0.0035 |
| 224037_at   |              |                                                                                                                                             | 0.1579 | 0.049  |
| 224121_x_at | PLEKHB2      | pleckstrin homology domain containing; family B (evectins) member 2                                                                         | 0.1016 | 0.0455 |
| 224160_s_at | ACAD9        | acyl-Coenzyme A dehydrogenase family; member 9                                                                                              | 0.5965 | 0.0419 |
| 224187_x_at | HSPA8        | heat shock 70kDa protein 8, similar to heat shock protein 8                                                                                 | 0.4223 | 0.027  |
| 224190_x_at | NOD1         | nucleotide-binding oligomerization domain containing 1                                                                                      | 0.2395 | 0.0246 |
| 224236_s_at |              |                                                                                                                                             | 0.1567 | 0.0048 |
| 224238_at   |              |                                                                                                                                             | 0.1659 | 0.0331 |
| 224302_s_at | MRPS36       | mitochondrial ribosomal protein S36                                                                                                         | 0.5339 | 0.0274 |
| 224303_x_at | NIN          | ninein (GSK3B interacting protein)                                                                                                          | 0.5174 | 0.009  |
| 224304_x_at | NIN          | ninein (GSK3B interacting protein)                                                                                                          | 0.754  | 0.0102 |
| 224356_x_at | MS4A6A       | membrane-spanning 4-domains; subfamily A; member 6A                                                                                         | 2.3993 | 0.0004 |
| 224357_s_at | MS4A4A       | membrane-spanning 4-domains; subfamily A; member 4                                                                                          | 1.081  | 0.0118 |
| 224358_s_at | MS4A7        | membrane-spanning 4-domains; subfamily A; member 7                                                                                          | 0.8304 | 0.0122 |
| 224376_s_at | C20orf24     | chromosome 20 open reading frame 24                                                                                                         | 0.8587 | 0.0049 |
| 224404_s_at | FCRL5        | Fc receptor-like 5                                                                                                                          | 0.2312 | 0.0439 |
| 224407_s_at | RP6-213H19.1 | serine/threonine protein kinase MST4                                                                                                        | 0.6115 | 0.0319 |
| 224451_x_at | ARHGAP9      | Rho GTPase activating protein 9                                                                                                             | 1.4058 | 0.0071 |
| 224452_s_at | MGC12966     | hypothetical protein LOC84792                                                                                                               | 0.5193 | 0.0026 |
| 224455_s_at | ADPGK        | ADP-dependent glucokinase                                                                                                                   | 0.7008 | 0.0315 |

|             |           |                                                                             |        |        |
|-------------|-----------|-----------------------------------------------------------------------------|--------|--------|
| 224476_s_at | MESP1     | mesoderm posterior 1 homolog (mouse)                                        | 0.9399 | 0.0011 |
| 224478_s_at | C7orf50   | chromosome 7 open reading frame 50                                          | 1.2957 | 0.0078 |
| 224480_s_at | MAG1      | lung cancer metastasis-associated protein                                   | 1.5622 | 0.0012 |
| 224486_s_at | C15orf41  | chromosome 15 open reading frame 41                                         | 0.4438 | 0.0428 |
| 224500_s_at | MON1A     | MON1 homolog A (yeast)                                                      | 0.8599 | 0.0038 |
| 224531_at   | GPR61     | G protein-coupled receptor 61                                               | 0.1261 | 0.0444 |
| 224539_s_at | PCDHAC2   | protocadherin alpha subfamily C; 2                                          | 0.4037 | 0.0101 |
| 224573_at   | MGC71993  | similar to DNA segment; Chr 11; Brigham & Womens Genetics 0434 expressed    | 0.3015 | 0.0338 |
| 224586_x_at | SUB1      | SUB1 homolog (S. cerevisiae)                                                | 0.2744 | 0.0314 |
| 224594_x_at | ACTB      | actin; beta                                                                 | 0.1238 | 0.0198 |
| 224608_s_at | VPS25     | vacuolar protein sorting 25 homolog (S. cerevisiae)                         | 0.4957 | 0.0103 |
| 224661_at   | PIGY      | phosphatidylinositol glycan anchor biosynthesis; class Y                    | 0.5107 | 0.0405 |
| 224669_at   | SYS1      | SYS1 Golgi-localized integral membrane protein homolog (S. cerevisiae)      | 0.9423 | 0.0439 |
| 224675_at   | MESDC2    | mesoderm development candidate 2                                            | 0.5739 | 0.0269 |
| 224679_at   | MESDC2    | mesoderm development candidate 2                                            | 0.5766 | 0.0438 |
| 224701_at   | PARP14    | poly (ADP-ribose) polymerase family; member 14                              | 0.9235 | 0.0437 |
| 224707_at   | C5orf32   | chromosome 5 open reading frame 32                                          | 1.1693 | 0.0102 |
| 224709_s_at | CDC42SE2  | CDC42 small effector 2                                                      | 0.6225 | 0.0184 |
| 224732_at   | CTF8      | chromosome transmission fidelity factor 8 homolog (S. cerevisiae)           | 0.8279 | 0.0005 |
| 224756_s_at | BAT5      | HLA-B associated transcript 5                                               | 0.4847 | 0.0415 |
| 224779_s_at | FAM96A    | family with sequence similarity 96; member A                                | 0.459  | 0.0157 |
| 224809_x_at | TINF2     | TERF1 (TRF1)-interacting nuclear factor 2                                   | 0.6946 | 0.0026 |
| 224813_at   | WASL      | Wiskott-Aldrich syndrome-like                                               | 0.3125 | 0.0394 |
| 224816_at   | C7orf20   | Chromosome 7 open reading frame 20                                          | 0.1932 | 0.0124 |
| 224819_at   | TCEAL8    | transcription elongation factor A (SII)-like 8                              | 1.1115 | 0.0008 |
| 224821_at   | ABHD14B   | abhydrolase domain containing 14B                                           | 1.1789 | 0.0353 |
| 224846_at   | SHKBP1    | SH3KBP1 binding protein 1                                                   | 0.4952 | 0.0102 |
| 224869_s_at | MRPS25    | mitochondrial ribosomal protein S25                                         | 0.856  | 0.0009 |
| 224880_at   | RALA      | v-ral simian leukemia viral oncogene homolog A (ras related)                | 0.5286 | 0.0345 |
| 224883_at   | PLDN      | pallidin homolog (mouse)                                                    | 0.8322 | 0.0315 |
| 224890_s_at | LOC389541 | similar to CG14977-PA                                                       | 0.6861 | 0.0234 |
| 224892_at   | PLDN      | pallidin homolog (mouse)                                                    | 0.5094 | 0.0293 |
| 224899_s_at | LOC728866 | implantation-associated protein, similar to implantation-associated protein | 0.4929 | 0.0436 |
| 224927_at   | KIAA1949  | KIAA1949                                                                    | 0.9817 | 0.0067 |
| 225002_s_at | SUMF2     | sulfatase modifying factor 2                                                | 0.961  | 0.0025 |
| 225003_at   | MGC3205   | MBC3205, hypothetical protein MGC3205                                       | 0.7473 | 0.0323 |
| 225014_at   | LOC389203 | hypothetical gene supported by BC032431                                     | 0.8526 | 0.0327 |
| 225019_at   | CAMK2D    | calcium/calmodulin-dependent protein kinase (CaM kinase) II delta           | 0.6815 | 0.0413 |
| 225049_at   | BLOC1S2   | biogenesis of lysosome-related organelles complex-1; subunit 2              | 0.5302 | 0.0259 |
| 225051_at   | EPB41     | erythrocyte membrane protein band 4.1 (elliptocytosis 1; RH-linked)         | 0.9109 | 0.0122 |
| 225092_at   | RABEP1    | rabaptin; RAB GTPase binding effector protein 1                             | 0.7465 | 0.016  |
| 225104_at   | ZNF598    | zinc finger protein 598                                                     | 0.5635 | 0.0299 |
| 225125_at   | TMEM32    | transmembrane protein 32                                                    | 0.8059 | 0.0273 |
| 225145_at   | NCOA5     | nuclear receptor coactivator 5                                              | 0.7461 | 0.0185 |
| 225194_at   | PLRG1     | pleiotropic regulator 1 (PRL1 homolog; Arabidopsis)                         | 0.3999 | 0.0454 |
| 225196_s_at | MRPS26    | mitochondrial ribosomal protein S26                                         | 0.4436 | 0.0267 |
| 225204_at   | PPTC7     | PTC7 protein phosphatase homolog (S. cerevisiae)                            | 0.6624 | 0.0364 |
| 225213_at   | PPTC7     | PTC7 protein phosphatase homolog (S. cerevisiae)                            | 0.7633 | 0.0047 |
| 225228_at   | TMEM77    | transmembrane protein 77                                                    | 0.6639 | 0.0365 |
| 225232_at   | MTMR12    | myotubularin related protein 12                                             | 1.1535 | 0.0002 |
| 225252_at   | SRXN1     | sulfiredoxin 1 homolog (S. cerevisiae)                                      | 0.7221 | 0.0114 |
| 225253_s_at | METTL2A   | methyltransferase like 2A, methyltransferase like 2B                        | 0.6745 | 0.0472 |
| 225259_at   | RAB6B     | RAB6B; member RAS oncogene family                                           | 0.7718 | 0.0382 |
| 225270_at   | NEO1      | neogenin homolog 1 (chicken)                                                | 0.8729 | 0.0378 |

|             |           |                                                                                                       |        |        |
|-------------|-----------|-------------------------------------------------------------------------------------------------------|--------|--------|
| 225305_at   | SLC25A29  | solute carrier family 25; member 29                                                                   | 0.7823 | 0.0261 |
| 225313_at   | C20orf177 | chromosome 20 open reading frame 177                                                                  | 1.2952 | 0.0058 |
| 225353_s_at | C1QC      | complement component 1; q subcomponent; C chain                                                       | 1.4218 | 0.0283 |
| 225357_s_at | INOC1     | INO80 complex homolog 1 ( <i>S. cerevisiae</i> )                                                      | 0.4383 | 0.0095 |
| 225394_s_at | ZCRB1     | zinc finger CCHC-type and RNA binding motif 1                                                         | 0.4873 | 0.0358 |
| 225397_at   | CCDC32    | coiled-coil domain containing 32                                                                      | 0.9289 | 0.0185 |
| 225415_at   | DTX3L     | deltex 3-like ( <i>Drosophila</i> )                                                                   | 0.7358 | 0.0224 |
| 225432_s_at | CSRP2BP   | CSRP2 binding protein                                                                                 | 0.906  | 0.0164 |
| 225447_at   | GPD2      | glycerol-3-phosphate dehydrogenase 2 (mitochondrial)                                                  | 0.9284 | 0.0342 |
| 225538_at   | ZCCHC9    | zinc finger; CCHC domain containing 9                                                                 | 0.836  | 0.0334 |
| 225545_at   | EEF2K     | eukaryotic elongation factor-2 kinase                                                                 | 0.8481 | 0.0359 |
| 225546_at   | EEF2K     | eukaryotic elongation factor-2 kinase                                                                 | 0.7138 | 0.0318 |
| 225552_x_at | AURKAIP1  | aurora kinase A interacting protein 1, similar to Cyclin-L2 (Paneth cell-enhanced expression protein) | 0.4617 | 0.035  |
| 225556_at   | LOC203547 | hypothetical protein LOC203547                                                                        | 0.7948 | 0.0009 |
| 225558_at   | GIT2      | G protein-coupled receptor kinase interactor 2                                                        | 0.5921 | 0.0456 |
| 225559_at   | C3orf19   | chromosome 3 open reading frame 19                                                                    | 0.3863 | 0.0162 |
| 225583_at   | UXS1      | UDP-glucuronate decarboxylase 1                                                                       | 0.9572 | 0.0205 |
| 225601_at   | HMGB3     | high-mobility group box 3                                                                             | 1.7452 | 0.0045 |
| 225619_at   | SLAIN1    | SLAIN motif family; member 1                                                                          | 1.6193 | 0.0227 |
| 225622_at   | PAG1      | phosphoprotein associated with glycosphingolipid microdomains 1                                       | 0.5863 | 0.0237 |
| 225623_at   | KIAA1737  | KIAA1737                                                                                              | 0.7517 | 0.0181 |
| 225626_at   | PAG1      | phosphoprotein associated with glycosphingolipid microdomains 1                                       | 1.397  | 0.0084 |
| 225630_at   | KIAA1706  | KIAA1706 protein                                                                                      | 0.715  | 0.0005 |
| 225631_at   | KIAA1706  | KIAA1706 protein                                                                                      | 0.5961 | 0.0036 |
| 225651_at   | UBE2E2    | ubiquitin-conjugating enzyme E2E 2 (UBC4/5 homolog; yeast)                                            | 1.8204 | 0.0103 |
| 225653_at   | LOC644617 | Hypothetical LOC644617                                                                                | 0.1913 | 0.0474 |
| 225670_at   | LOC134145 | hypothetical protein LOC134145                                                                        | 0.953  | 0.0167 |
| 225701_at   | AKNA      | AT-hook transcription factor                                                                          | 0.8205 | 0.0312 |
| 225719_s_at | MRPL55    | mitochondrial ribosomal protein L55                                                                   | 0.4464 | 0.0406 |
| 225734_at   | FBXO22    | F-box protein 22                                                                                      | 0.6559 | 0.0207 |
| 225743_at   | RPUSD3    | RNA pseudouridylate synthase domain containing 3                                                      | 0.7578 | 0.0422 |
| 225752_at   | NIPA1     | non imprinted in Prader-Willi/Angelman syndrome 1                                                     | 1.3612 | 0.0266 |
| 225763_at   | RCSD1     | RCSD domain containing 1                                                                              | 1.0234 | 0.0073 |
| 225769_at   | COG6      | component of oligomeric golgi complex 6                                                               | 0.7082 | 0.0224 |
| 225775_at   | TSPAN33   | tetraspanin 33                                                                                        | 1.1308 | 0.0006 |
| 225810_at   | MTMR10    | myotubularin related protein 10                                                                       | 0.836  | 0.0037 |
| 225832_s_at | DAGLB     | diacylglycerol lipase; beta                                                                           | 0.6983 | 0.0382 |
| 225843_at   | ZFYVE19   | zinc finger; FYVE domain containing 19                                                                | 0.6344 | 0.0199 |
| 225848_at   | ZNF746    | zinc finger protein 746                                                                               | 0.6461 | 0.0129 |
| 225853_at   | GNPNAT1   | glucosamine-phosphate N-acetyltransferase 1                                                           | 0.7017 | 0.0005 |
| 225921_at   | NIN       | ninein (GSK3B interacting protein)                                                                    | 1.5074 | 0.0006 |
| 225922_at   | KIAA1450  | KIAA1450 protein                                                                                      | 0.6777 | 0.0059 |
| 225926_at   | VT11B     | vesicle transport through interaction with t-SNAREs homolog 1B (yeast)                                | 0.8401 | 0.002  |
| 225940_at   | EIF4E3    | eukaryotic translation initiation factor 4E family member 3                                           | 0.8127 | 0.0274 |
| 225941_at   | EIF4E3    | eukaryotic translation initiation factor 4E family member 3                                           | 0.9405 | 0.0318 |
| 225943_at   | NLN       | neurolysin (metallopeptidase M3 family)                                                               | 0.7687 | 0.0379 |
| 225944_at   | NLN       | neurolysin (metallopeptidase M3 family)                                                               | 1.5659 | 0.0102 |
| 225948_at   | C14orf153 | chromosome 14 open reading frame 153                                                                  | 0.8863 | 0.0064 |
| 225959_s_at | ZNRF1     | zinc and ring finger 1                                                                                | 1.2376 | 0.0066 |
| 225973_at   | TAP2      | transporter 2; ATP-binding cassette; sub-family B (MDR/TAP)                                           | 1.4383 | 0.0169 |
| 225993_at   | EARS2     | glutamyl-tRNA synthetase 2; mitochondrial (putative)                                                  | 0.6524 | 0.0423 |
| 226004_at   | CABLES2   | Cdk5 and Abl enzyme substrate 2                                                                       | 0.8418 | 0.0199 |
| 226026_at   | DIRC2     | disrupted in renal carcinoma 2                                                                        | 0.8536 | 0.0057 |

|             |              |                                                                                                                                  |        |        |
|-------------|--------------|----------------------------------------------------------------------------------------------------------------------------------|--------|--------|
| 226037_s_at | LOC728198    | TAF9B RNA polymerase II; TATA box binding protein (TBP)-associated factor; 31kDa, similar to transcription associated factor 9B  | 1.0516 | 0.0092 |
| 226039_at   | MGAT4A       | mannosyl (alpha-1;3-)-glycoprotein beta-1;4-N-acetylglucosaminyltransferase; isozyme A                                           | 2.3076 | 0      |
| 226044_at   | TDP1         | tyrosyl-DNA phosphodiesterase 1                                                                                                  | 0.3675 | 0.0486 |
| 226066_at   | MITF         | microphthalmia-associated transcription factor                                                                                   | 1.5812 | 0.0039 |
| 226068_at   | SYK          | spleen tyrosine kinase                                                                                                           | 1.0717 | 0.0302 |
| 226071_at   | ADAMTSL4     | ADAMTS-like 4                                                                                                                    | 0.607  | 0.0457 |
| 226075_at   | SPSB1        | splA/ryanodine receptor domain and SOCS box containing 1                                                                         | 0.9258 | 0.0165 |
| 226083_at   | TMEM70       | transmembrane protein 70                                                                                                         | 0.5607 | 0.0005 |
| 226092_at   | MPP5         | membrane protein; palmitoylated 5 (MAGUK p55 subfamily member 5)                                                                 | 0.7857 | 0.0157 |
| 226099_at   | ELL2         | elongation factor; RNA polymerase II; 2                                                                                          | 1.6817 | 0.0097 |
| 226107_at   |              | CDNA FLJ13495 fis; clone PLACE1004425, Full-length cDNA clone CS0DI084YF13 of Placenta Cot 25-normalized of Homo sapiens (human) | 0.5214 | 0.0257 |
| 226108_at   | NHN1         | conserved nuclear protein NHN1                                                                                                   | 0.6256 | 0.0284 |
| 226135_at   | C6orf107     | chromosome 6 open reading frame 107                                                                                              | 0.9543 | 0.0116 |
| 226141_at   | DKFZp761B107 | hypothetical protein DKFZp761B107                                                                                                | 0.4569 | 0.0484 |
| 226152_at   | TTC7B        | tetratricopeptide repeat domain 7B                                                                                               | 0.8621 | 0.0059 |
| 226172_at   | USP42        | Ubiquitin specific peptidase 42                                                                                                  | 0.1291 | 0.0127 |
| 226180_at   | WDR36        | WD repeat domain 36                                                                                                              | 0.9822 | 0.0011 |
| 226182_s_at | WISP3        | WNT1 inducible signaling pathway protein 3                                                                                       | 0.109  | 0.0378 |
| 226195_at   | C14orf179    | chromosome 14 open reading frame 179                                                                                             | 0.4986 | 0.0059 |
| 226196_s_at | C14orf179    | chromosome 14 open reading frame 179                                                                                             | 0.6274 | 0.0071 |
| 226218_at   | IL7R         | interleukin 7 receptor                                                                                                           | 2.5295 | 0.0037 |
| 226219_at   | ARHGAP30     | Rho GTPase activating protein 30                                                                                                 | 1.1728 | 0.0099 |
| 226241_s_at | MRPL52       | mitochondrial ribosomal protein L52                                                                                              | 0.7258 | 0.0027 |
| 226248_s_at | KIAA1324     | KIAA1324                                                                                                                         | 0.555  | 0.0017 |
| 226261_at   | ZNRF2        | zinc and ring finger 2                                                                                                           | 1.0787 | 0.0016 |
| 226272_at   | RCAN3        | RCAN family member 3                                                                                                             | 1.4182 | 0.0107 |
| 226276_at   | TMEM167      | transmembrane protein 167                                                                                                        | 0.7071 | 0.0296 |
| 226321_at   | LYSMD3       | LysM; putative peptidoglycan-binding; domain containing 3                                                                        | 0.762  | 0.0107 |
| 226354_at   | LACTB        | lactamase; beta                                                                                                                  | 0.8747 | 0.015  |
| 226369_at   | LOC338799    | hypothetical locus LOC338799                                                                                                     | 0.4263 | 0.0178 |
| 226378_s_at | C19orf25     | chromosome 19 open reading frame 25                                                                                              | 0.7139 | 0.0453 |
| 226393_at   | CYP2U1       | cytochrome P450; family 2; subfamily U; polypeptide 1                                                                            | 1.2934 | 0.0126 |
| 226410_at   | LOC348180    | hypothetical protein LOC348180                                                                                                   | 0.5881 | 0.009  |
| 226421_at   | AMMECR1      | Alport syndrome; mental retardation; midface hypoplasia and elliptocytosis chromosomal region; gene 1                            | 1.3433 | 0.0182 |
| 226423_at   | PAQR8        | progesterone and adipoQ receptor family member VIII                                                                              | 0.9451 | 0.0485 |
| 226440_at   | DUSP22       | dual specificity phosphatase 22                                                                                                  | 0.8513 | 0.0343 |
| 226449_at   | CCDC100      | coiled-coil domain containing 100                                                                                                | 0.6942 | 0.003  |
| 226459_at   | PIK3AP1      | phosphoinositide-3-kinase adaptor protein 1                                                                                      | 1.4467 | 0.0232 |
| 226460_at   | KIAA1450     | KIAA1450 protein                                                                                                                 | 0.6256 | 0.0112 |
| 226462_at   | STXBP6       | syntaxin binding protein 6 (amisyn)                                                                                              | 0.6567 | 0.0116 |
| 226466_s_at | FAM58A       | family with sequence similarity 58; member A                                                                                     | 0.7297 | 0.0054 |
| 226474_at   | NLRC5        | NLR family; CARD domain containing 5                                                                                             | 1.88   | 0.0064 |
| 226476_s_at | VPRBP        | Vpr (HIV-1) binding protein                                                                                                      | 0.4992 | 0.0214 |
| 226499_at   | NRARP        | Notch-regulated ankyrin repeat protein                                                                                           | 0.6518 | 0.0222 |
| 226519_s_at | AGXT2L2      | alanine-glyoxylate aminotransferase 2-like 2                                                                                     | 0.9424 | 0.0087 |
| 226524_at   | C3orf38      | chromosome 3 open reading frame 38                                                                                               | 0.7307 | 0.0485 |
| 226560_at   |              | Transcribed locus                                                                                                                | 2.4056 | 0.0264 |
| 226568_at   | FAM102B      | family with sequence similarity 102; member B                                                                                    | 1.2831 | 0.0217 |
| 226579_at   |              | Transcribed locus; weakly similar to XP_001053793.1 hypothetical protein [Rattus norvegicus]                                     | 0.7172 | 0.0239 |
| 226580_at   | BRMS1L       | breast cancer metastasis-suppressor 1-like                                                                                       | 0.6966 | 0.0255 |
| 226584_s_at | FAM110A      | family with sequence similarity 110; member A                                                                                    | 0.3249 | 0.0117 |

|             |           |                                                                      |        |        |
|-------------|-----------|----------------------------------------------------------------------|--------|--------|
| 226596_x_at | LOC729852 | hypothetical protein LOC729852                                       | 0.8756 | 0.0198 |
| 226627_at   | 8-Sep     | septin 8                                                             | 0.5294 | 0.0186 |
| 226640_at   | DAGLB     | diacylglycerol lipase; beta                                          | 0.6168 | 0.0187 |
| 226642_s_at | NUDCD2    | NudC domain containing 2                                             | 0.8481 | 0.0447 |
| 226650_at   | ZFAND2A   | zinc finger; AN1-type domain 2A                                      | 0.8631 | 0.0494 |
| 226659_at   | DEF6      | differentially expressed in FDCP 6 homolog (mouse)                   | 0.4285 | 0.0164 |
| 226671_at   | LAMP2     | Lysosomal-associated membrane protein 2                              | 1.0995 | 0.0272 |
| 226683_at   | SNAG1     | Sorting nexin associated golgi protein 1                             | 0.9392 | 0.0078 |
| 226686_at   | CISD2     | CDGSH iron sulfur domain 2                                           | 0.5695 | 0.0482 |
| 226688_at   | C3orf23   | chromosome 3 open reading frame 23                                   | 0.7611 | 0.0145 |
| 226701_at   | GJA5      | gap junction protein; alpha 5; 40kDa                                 | 0.4329 | 0.0196 |
| 226722_at   | FAM20C    | family with sequence similarity 20; member C                         | 1.0712 | 0.0215 |
| 226725_at   | SLFN5     | Schlafen family member 5                                             | 1.155  | 0.0085 |
| 226727_at   | CISD3     | CDGSH iron sulfur domain 3                                           | 0.6776 | 0.0314 |
| 226736_at   | CHURC1    | churchill domain containing 1                                        | 1.1201 | 0.0199 |
| 226741_at   | SLC12A6   | solute carrier family 12 (potassium/chloride transporters); member 6 | 0.9266 | 0.0007 |
| 226750_at   | LARP2     | La ribonucleoprotein domain family; member 2                         | 0.9595 | 0.0109 |
| 226782_at   | SLC25A30  | solute carrier family 25; member 30                                  | 0.8365 | 0.0241 |
| 226785_at   | ATP11C    | ATPase; Class VI; type 11C                                           | 1.4215 | 0.0023 |
| 226787_at   | ZNF18     | zinc finger protein 18                                               | 0.8054 | 0.0165 |
| 226789_at   | LOC647121 | similar to embigin homolog                                           | 2.9813 | 0.007  |
| 226793_at   | LOC283267 | hypothetical protein LOC283267                                       | 0.5257 | 0.0373 |
| 226796_at   | LOC116236 | hypothetical protein LOC116236                                       | 0.7983 | 0.0065 |
| 226804_at   | FAM20A    | family with sequence similarity 20; member A                         | 0.6204 | 0.0304 |
| 226810_at   |           | MRNA full length insert cDNA clone EUROIMAGE 1509279                 | 1.3842 | 0.029  |
| 226811_at   | FAM46C    | family with sequence similarity 46; member C                         | 1.3202 | 0.0233 |
| 226815_at   | C3orf31   | chromosome 3 open reading frame 31                                   | 0.7091 | 0.0108 |
| 226817_at   | DSC2      | desmocollin 2                                                        | 0.7262 | 0.0356 |
| 226818_at   | MPEG1     | macrophage expressed gene 1                                          | 1.629  | 0.0121 |
| 226823_at   | PHACTR4   | phosphatase and actin regulator 4                                    | 0.6636 | 0.0138 |
| 226836_at   | SFT2D1    | SFT2 domain containing 1                                             | 0.2136 | 0.0078 |
| 226841_at   | MPEG1     | macrophage expressed gene 1                                          | 1.3154 | 0.0281 |
| 226853_at   | BMP2K     | BMP2 inducible kinase                                                | 1.4231 | 0.0064 |
| 226860_at   | TMEM19    | transmembrane protein 19                                             | 0.8832 | 0.0479 |
| 226869_at   | MEGF6     | multiple EGF-like-domains 6                                          | 0.1682 | 0.0371 |
| 226873_at   |           | CDNA clone IMAGE:4794011                                             | 0.6163 | 0.0317 |
| 226874_at   | KLHL8     | kelch-like 8 (Drosophila)                                            | 0.6592 | 0.0356 |
| 226878_at   | HLA-DOA   | major histocompatibility complex; class II; DO alpha                 | 1.5237 | 0.0022 |
| 226881_at   | GRPEL2    | GrpE-like 2; mitochondrial (E. coli)                                 | 0.6256 | 0.035  |
| 226907_at   | PPP1R14C  | protein phosphatase 1; regulatory (inhibitor) subunit 14C            | 0.3773 | 0.0176 |
| 226912_at   | ZDHHC23   | zinc finger; DHHC-type containing 23                                 | 1.4101 | 0.0013 |
| 226938_at   | WDR21A    | WD repeat domain 21A                                                 | 0.8627 | 0.0225 |
| 226947_at   | GUSBL2    | glucuronidase; beta-like 2                                           | 0.6255 | 0.0161 |
| 226952_at   | EAF1      | ELL associated factor 1                                              | 1.0812 | 0.0009 |
| 226953_at   | DARC      | Duffy blood group; chemokine receptor                                | 0.1295 | 0.0493 |
| 226970_at   | FBXO33    | F-box protein 33                                                     | 0.8621 | 0.0116 |
| 226983_at   | ZNF777    | zinc finger protein 777                                              | 0.3483 | 0.0338 |
| 226988_s_at | MYH14     | myosin; heavy chain 14                                               | 0.5105 | 0.0174 |
| 226989_at   | RGMB      | RGM domain family; member B                                          | 0.9297 | 0.0322 |
| 227001_at   | NPAL2     | NIPA-like domain containing 2                                        | 1.2067 | 0.0402 |
| 227002_at   | FAM78A    | family with sequence similarity 78; member A                         | 0.4757 | 0.005  |
| 227030_at   |           | Full length insert cDNA clone YY82H04                                | 0.4025 | 0.0065 |
| 227038_at   | SGMS2     | sphingomyelin synthase 2                                             | 2.0304 | 0.0044 |
| 227043_at   | LOC126075 | hypothetical protein LOC126075                                       | 0.5309 | 0.0233 |
| 227100_at   | B3GALTL   | beta 1,3-galactosyltransferase-like                                  | 0.5683 | 0.0391 |
| 227133_at   | CXorf39   | chromosome X open reading frame 39                                   | 1.123  | 0.0164 |
| 227135_at   | ASAHL     | N-acylsphingosine amidohydrolase (acid ceramidase)-like              | 1.4591 | 0.0218 |
| 227143_s_at | BID       | BH3 interacting domain death agonist                                 | 0.6916 | 0.0346 |

|             |               |                                                                                           |        |        |
|-------------|---------------|-------------------------------------------------------------------------------------------|--------|--------|
| 227153_at   | IMMP2L        | IMP2 inner mitochondrial membrane peptidase-like (S. cerevisiae)                          | 1.3266 | 0.0031 |
| 227168_at   | MIAT          | myocardial infarction associated transcript (non-protein coding)                          | 0.7585 | 0.0425 |
| 227172_at   | TMEM116       | transmembrane protein 116                                                                 | 0.7525 | 0.0232 |
| 227178_at   | CUGBP2        | CUG triplet repeat; RNA binding protein 2                                                 | 0.8593 | 0.0288 |
| 227180_at   | ELOVL7        | ELOVL family member 7; elongation of long chain fatty acids (yeast)                       | 2.2101 | 0.0073 |
| 227184_at   |               |                                                                                           | 0.7004 | 0.0177 |
| 227193_at   |               | CDNA FLJ37631 fis; clone BRCCOC2015944                                                    | 1.1306 | 0.0066 |
| 227201_at   | LOC643837     | hypothetical protein LOC643837                                                            | 0.4253 | 0.0028 |
| 227232_at   | EVL           | Enah/Vasp-like                                                                            | 0.4237 | 0.0407 |
| 227246_at   | PLRG1         | pleiotropic regulator 1 (PRL1 homolog; Arabidopsis)                                       | 0.805  | 0.0173 |
| 227262_at   | HAPLN3        | hyaluronan and proteoglycan link protein 3                                                | 0.2164 | 0.0403 |
| 227265_at   | FGL2          | fibrinogen-like 2                                                                         | 1.9719 | 0.001  |
| 227266_s_at | FYB           | FYN binding protein (FYB-120/130)                                                         | 1.654  | 0.0015 |
| 227272_at   | C15orf52      | chromosome 15 open reading frame 52                                                       | 0.9927 | 0.0049 |
| 227280_s_at | CCNYL1        | Cyclin Y-like 1                                                                           | 0.6887 | 0.0344 |
| 227294_at   | ZNF689        | zinc finger protein 689                                                                   | 0.7417 | 0.0254 |
| 227298_at   | FLJ37798      | hypothetical gene supported by AK095117                                                   | 0.4128 | 0.0092 |
| 227304_at   | SMCR8         | Smith-Magenis syndrome chromosome region; candidate 8                                     | 0.5967 | 0.0247 |
| 227321_at   | GATS          | opposite strand transcription unit to STAG3                                               | 0.3144 | 0.0447 |
| 227335_at   | DIDO1         | death inducer-obliterator 1                                                               | 1.0235 | 0.0104 |
| 227340_s_at | RGMB          | RGM domain family; member B                                                               | 0.7043 | 0.0115 |
| 227344_at   | IKZF1         | IKAROS family zinc finger 1 (Ikaros)                                                      | 0.4862 | 0.0038 |
| 227345_at   | TNFRSF10D     | tumor necrosis factor receptor superfamily; member 10d; decoy with truncated death domain | 0.3692 | 0.0106 |
| 227346_at   | IKZF1         | IKAROS family zinc finger 1 (Ikaros)                                                      | 1.072  | 0.0202 |
| 227353_at   | TMC8          | transmembrane channel-like 8                                                              | 0.5951 | 0.0462 |
| 227354_at   | PAG1          | phosphoprotein associated with glycosphingolipid microdomains 1                           | 0.5148 | 0.0304 |
| 227367_at   | SLCO3A1       | solute carrier organic anion transporter family; member 3A1                               | 1.0862 | 0.0002 |
| 227396_at   | PTPRJ         | protein tyrosine phosphatase; receptor type; J                                            | 1.5985 | 0.0028 |
| 227413_at   | UBLCP1        | ubiquitin-like domain containing CTD phosphatase 1                                        | 0.4828 | 0.0372 |
| 227416_s_at | ZCRB1         | zinc finger CCHC-type and RNA binding motif 1                                             | 0.5019 | 0.0216 |
| 227429_at   | EFCAB4A       | EF-hand calcium binding domain 4A                                                         | 0.3639 | 0.0302 |
| 227445_at   | ZNF689        | zinc finger protein 689                                                                   | 0.9539 | 0.0244 |
| 227447_at   | SKIV2L2       | superkiller viralicidic activity 2-like 2 (S. cerevisiae)                                 | 0.582  | 0.0067 |
| 227458_at   |               |                                                                                           | 0.5095 | 0.0153 |
| 227459_at   |               | CDNA FLJ32348 fis; clone PROST2007200                                                     | 0.3261 | 0.0319 |
| 227460_at   | C3orf63       | Chromosome 3 open reading frame 63                                                        | 0.1983 | 0.0136 |
| 227463_at   | ACE           | angiotensin I converting enzyme (peptidyl-dipeptidase A) 1                                | 0.2238 | 0.0481 |
| 227467_at   | RDH10         | retinol dehydrogenase 10 (all-trans)                                                      | 1.119  | 0.0199 |
| 227482_at   | ADCK1         | aarF domain containing kinase 1                                                           | 0.5659 | 0.0181 |
| 227521_at   | FBXO33        | F-box protein 33                                                                          | 0.8714 | 0.0304 |
| 227540_at   | EEFSEC        | eukaryotic elongation factor; selenocysteine-tRNA-specific                                | 0.4492 | 0.0158 |
| 227559_at   |               |                                                                                           | 0.96   | 0.0207 |
| 227575_s_at | C14orf102     | chromosome 14 open reading frame 102                                                      | 0.6199 | 0.0101 |
| 227580_s_at | DKFZP434B0335 | DKFZP434B0335 protein                                                                     | 0.5195 | 0.0093 |
| 227586_at   | TMEM170       | transmembrane protein 170                                                                 | 0.6958 | 0.0081 |
| 227611_at   | TARSL2        | threonyl-tRNA synthetase-like 2                                                           | 1.1147 | 0.0088 |
| 227628_at   | LOC493869     | similar to RIKEN cDNA 2310016C16                                                          | 1.1106 | 0.0416 |
| 227633_at   | RHEB          | Ras homolog enriched in brain                                                             | 0.6695 | 0.0025 |
| 227645_at   | PIK3R5        | phosphoinositide-3-kinase; regulatory subunit 5; p101                                     | 0.5197 | 0.0261 |
| 227699_at   | C14orf149     | chromosome 14 open reading frame 149                                                      | 1.0379 | 0      |
| 227705_at   | TCEAL7        | transcription elongation factor A (SII)-like 7                                            | 0.9899 | 0.0436 |
| 227726_at   | RNF166        | ring finger protein 166                                                                   | 0.4593 | 0.0335 |

|             |           |                                                                                                                             |        |        |
|-------------|-----------|-----------------------------------------------------------------------------------------------------------------------------|--------|--------|
| 227741_at   | PTPLB     | protein tyrosine phosphatase-like (proline instead of catalytic arginine); member b                                         | 0.8905 | 0.0384 |
| 227749_at   |           | Transcribed locus                                                                                                           | 0.3405 | 0.0353 |
| 227767_at   | CSNK1G3   | casein kinase 1; gamma 3                                                                                                    | 0.5457 | 0.0306 |
| 227791_at   | SLC9A9    | solute carrier family 9 (sodium/hydrogen exchanger); member 9                                                               | 1.072  | 0.0083 |
| 227798_at   | SMAD1     | SMAD family member 1                                                                                                        | 0.7877 | 0.0186 |
| 227841_at   | CEMP1     | Cementum protein 1                                                                                                          | 0.6575 | 0.0153 |
| 227844_at   | FMNL3     | formin-like 3                                                                                                               | 0.2681 | 0.0356 |
| 227846_at   | GPR176    | G protein-coupled receptor 176                                                                                              | 0.6417 | 0.0032 |
| 227867_at   | LOC129293 | hypothetical protein LOC129293                                                                                              | 0.2595 | 0.037  |
| 227869_at   | FAM104B   | Family with sequence similarity 104; member B                                                                               | 0.4571 | 0.0379 |
| 227871_at   | CHM       | choroideremia (Rab escort protein 1)                                                                                        | 0.9315 | 0.0154 |
| 227897_at   | RAP2B     | RAP2B; member of RAS oncogene family                                                                                        | 1.3659 | 0.0047 |
| 227941_at   | LOC339803 | hypothetical protein LOC339803                                                                                              | 0.9956 | 0.0331 |
| 227949_at   | PHACTR3   | phosphatase and actin regulator 3                                                                                           | 0.3859 | 0.0487 |
| 227966_s_at | CCDC74A   | coiled-coil domain containing 74A, coiled-coil domain containing 74B                                                        | 1.1049 | 0.0459 |
| 227967_at   | TUBGCP5   | tubulin; gamma complex associated protein 5                                                                                 | 0.717  | 0.0073 |
| 228005_at   | ZXDB      | zinc finger; X-linked; duplicated B                                                                                         | 1.3159 | 0.0023 |
| 228010_at   | PPP2R2C   | protein phosphatase 2 (formerly 2A); regulatory subunit B; gamma isoform                                                    | 3.0405 | 0.0118 |
| 228019_s_at | MRPS18C   | mitochondrial ribosomal protein S18C                                                                                        | 0.6267 | 0.004  |
| 228027_at   | GPRASP2   | G protein-coupled receptor associated sorting protein 2                                                                     | 0.9712 | 0.0047 |
| 228031_at   | C20orf121 | chromosome 20 open reading frame 121                                                                                        | 0.7233 | 0.0083 |
| 228042_at   | ADPRH     | ADP-ribosylarginine hydrolase                                                                                               | 0.4025 | 0.0071 |
| 228050_at   | UTP15     | UTP15; U3 small nucleolar ribonucleoprotein; homolog (S. cerevisiae)                                                        | 0.5131 | 0.007  |
| 228067_at   | C2orf55   | chromosome 2 open reading frame 55                                                                                          | 1.1028 | 0.0434 |
| 228080_at   | LAYN      | layilin                                                                                                                     | 1.1076 | 0.0276 |
| 228094_at   | AMICA1    | adhesion molecule; interacts with CXADR antigen 1                                                                           | 0.9275 | 0.0405 |
| 228108_at   |           | CDNA clone IMAGE:5263177                                                                                                    | 1.5145 | 0.0457 |
| 228109_at   | RASGRF2   | Ras protein-specific guanine nucleotide-releasing factor 2                                                                  | 0.7456 | 0.0057 |
| 228118_x_at | C16orf13  | Chromosome 16 open reading frame 13                                                                                         | 0.1436 | 0.0072 |
| 228146_at   | C17orf51  | chromosome 17 open reading frame 51                                                                                         | 0.3932 | 0.0003 |
| 228167_at   | KLHL6     | kelch-like 6 (Drosophila)                                                                                                   | 0.6416 | 0.0325 |
| 228190_at   | ATG4C     | ATG4 autophagy related 4 homolog C (S. cerevisiae), Ctr9; Paf1/RNA polymerase II complex component; homolog (S. cerevisiae) | 0.8487 | 0.0011 |
| 228200_at   |           | CDNA FLJ14756 fis; clone NT2RP3003193; moderately similar to ZINC FINGER PROTEIN 135                                        | 0.7603 | 0.0353 |
| 228231_at   |           | MRNA; cDNA DKFZp761E1721 (from clone DKFZp761E1721)                                                                         | 0.3988 | 0.0301 |
| 228234_at   | TICAM2    | toll-like receptor adaptor molecule 2                                                                                       | 0.9051 | 0.0346 |
| 228243_at   |           | Transcribed locus                                                                                                           | 1.2788 | 0.0088 |
| 228274_at   | SDSL      | serine dehydratase-like                                                                                                     | 0.9442 | 0.0288 |
| 228283_at   | MGC61571  | hypothetical protein MGC61571                                                                                               | 0.5406 | 0.0209 |
| 228289_at   |           | Transcribed locus                                                                                                           | 0.5465 | 0.01   |
| 228293_at   | DEPDC7    | DEP domain containing 7                                                                                                     | 0.7287 | 0.0154 |
| 228301_x_at | NDUFB10   | NADH dehydrogenase (ubiquinone) 1 beta subcomplex; 10; 22kDa                                                                | 0.4457 | 0.0201 |
| 228346_at   |           | Transcribed locus                                                                                                           | 1.4391 | 0.0313 |
| 228353_x_at | STS-1     | Cbl-interacting protein Sts-1                                                                                               | 0.2006 | 0.0071 |
| 228355_s_at | NDUFA12L  | NDUFA12-like                                                                                                                | 0.8309 | 0.0203 |
| 228359_at   | STS-1     | Cbl-interacting protein Sts-1                                                                                               | 0.2521 | 0.0014 |
| 228363_at   | BIRC4     | baculoviral IAP repeat-containing 4                                                                                         | 0.522  | 0.0445 |
| 228372_at   | C10orf128 | chromosome 10 open reading frame 128                                                                                        | 1.5534 | 0.0005 |
| 228373_at   | C16orf72  | chromosome 16 open reading frame 72                                                                                         | 0.5686 | 0.0444 |
| 228375_at   | IGSF11    | immunoglobulin superfamily; member 11                                                                                       | 1.5981 | 0.0054 |
| 228376_at   | GGTA1     | glycoprotein; alpha-galactosyltransferase 1, similar to glycoprotein galactosyltransferase alpha 1; 3                       | 1.4027 | 0.0141 |

|             |           |                                                                                                                        |        |        |
|-------------|-----------|------------------------------------------------------------------------------------------------------------------------|--------|--------|
| 228382_at   | FAM105B   | family with sequence similarity 105; member B                                                                          | 0.4736 | 0.0012 |
| 228394_at   | STK10     | serine/threonine kinase 10                                                                                             | 0.5611 | 0.0001 |
| 228421_s_at | EFEMP1    | EGF-containing fibulin-like extracellular matrix protein 1                                                             | 0.1194 | 0.0299 |
| 228444_at   |           | Transcribed locus                                                                                                      | 0.2704 | 0.0282 |
| 228532_at   | C1orf162  | chromosome 1 open reading frame 162                                                                                    | 1.4404 | 0.0302 |
| 228544_s_at | CSRP2BP   | CSRP2 binding protein                                                                                                  | 0.5443 | 0.0187 |
| 228557_at   | L3MBTL4   | l(3)mbt-like 4 (Drosophila)                                                                                            | 0.3778 | 0.0174 |
| 228570_at   | BTBD11    | BTB (POZ) domain containing 11                                                                                         | 1.8849 | 0.036  |
| 228591_at   | TNRC6C    | Trinucleotide repeat containing 6C                                                                                     | 0.1221 | 0.0446 |
| 228600_x_at | C7orf46   | chromosome 7 open reading frame 46                                                                                     | 1.0587 | 0.0024 |
| 228716_at   | THRB      | thyroid hormone receptor; beta (erythroblastic leukemia viral (v-erb-a) oncogene homolog 2; avian)                     | 2.0132 | 0.0091 |
| 228745_at   | SGTB      | small glutamine-rich tetratricopeptide repeat (TPR)-containing; beta                                                   | 1.1515 | 0.0051 |
| 228775_at   |           |                                                                                                                        | 0.9873 | 0.0429 |
| 228809_at   | CXorf40A  | chromosome X open reading frame 40A                                                                                    | 1.022  | 0.0172 |
| 228855_at   | LOC729777 | similar to Peroxisomal coenzyme A diphosphatase NUDT7 (Nucleoside diphosphate-linked moiety X motif 7) (Nudix motif 7) | 2.369  | 0.0009 |
| 228869_at   |           | Transcribed locus                                                                                                      | 0.7842 | 0.0268 |
| 228951_at   |           | Transcribed locus                                                                                                      | 0.8846 | 0.0093 |
| 229012_at   | C9orf24   | chromosome 9 open reading frame 24                                                                                     | 0.2477 | 0.0384 |
| 229013_at   | LOC145783 | hypothetical protein LOC145783                                                                                         | 0.4642 | 0.0064 |
| 229014_at   | FLJ42709  | hypothetical gene supported by AK124699                                                                                | 1.9202 | 0.0035 |
| 229019_at   | ZNF533    | zinc finger protein 533                                                                                                | 1.8524 | 0.0291 |
| 229026_at   | CDC42SE2  | CDC42 small effector 2                                                                                                 | 1.9303 | 0.006  |
| 229037_at   | TRIM69    | Tripartite motif-containing 69                                                                                         | 0.1733 | 0.0316 |
| 229055_at   | GPR68     | G protein-coupled receptor 68                                                                                          | 0.3795 | 0.0181 |
| 229064_s_at | RCAN3     | RCAN family member 3                                                                                                   | 0.3797 | 0.0202 |
| 229068_at   | CCT5      | chaperonin containing TCP1; subunit 5 (epsilon)                                                                        | 1.0716 | 0.0472 |
| 229094_at   | LOC401431 | hypothetical gene LOC401431                                                                                            | 0.5087 | 0.0001 |
| 229109_s_at | BLVRA     | Biliverdin reductase A                                                                                                 | 0.1759 | 0.0318 |
| 229121_at   |           | CDNA FLJ44441 fis; clone UTERU2020242                                                                                  | 0.7587 | 0.004  |
| 229125_at   | ANKRD38   | ankyrin repeat domain 38                                                                                               | 0.2049 | 0.0025 |
| 229132_at   | MINA      | MYC induced nuclear antigen                                                                                            | 0.1967 | 0.0117 |
| 229134_at   | VANGL1    | vang-like 1 (van gogh; Drosophila)                                                                                     | 0.4798 | 0.0001 |
| 229139_at   | JPH1      | junctophilin 1                                                                                                         | 1.7014 | 0.0122 |
| 229156_s_at |           | CDNA clone IMAGE:5274141                                                                                               | 0.2642 | 0.0165 |
| 229157_at   |           | CDNA clone IMAGE:5274141                                                                                               | 0.2219 | 0.0276 |
| 229174_at   | C3orf38   | chromosome 3 open reading frame 38                                                                                     | 0.591  | 0.0251 |
| 229181_s_at | CEP27     | centrosomal protein 27kDa                                                                                              | 0.8206 | 0.0053 |
| 229208_at   | CEP27     | centrosomal protein 27kDa                                                                                              | 0.6423 | 0.0211 |
| 229228_at   | CREB5     | cAMP responsive element binding protein 5                                                                              | 0.752  | 0.0406 |
| 229242_at   |           | Transcribed locus                                                                                                      | 0.3584 | 0.0165 |
| 229276_at   | IGSF9     | immunoglobulin superfamily; member 9                                                                                   | 0.2664 | 0.041  |
| 229277_at   |           | Beta-1 adrenergic receptor mRNA; 3' UTR                                                                                | 0.1749 | 0.0028 |
| 229284_at   | MAT2B     | Methionine adenosyltransferase II; beta                                                                                | 0.1492 | 0.0013 |
| 229356_x_at | INOC1     | INO80 complex homolog 1 (S. cerevisiae)                                                                                | 0.6466 | 0.0067 |
| 229363_at   |           | CDNA FLJ32121 fis; clone PEBLM1000083                                                                                  | 0.5878 | 0.0163 |
| 229367_s_at | GIMAP6    | GTPase; IMAP family member 6                                                                                           | 0.6826 | 0.0325 |
| 229383_at   |           | CDNA FLJ34016 fis; clone FCBBF2002541                                                                                  | 1.3012 | 0.0015 |
| 229390_at   | FAM26F    | family with sequence similarity 26; member F                                                                           | 1.7491 | 0.0247 |
| 229391_s_at | FAM26F    | family with sequence similarity 26; member F                                                                           | 1.34   | 0.0197 |
| 229426_at   | COX5A     | cytochrome c oxidase subunit Va                                                                                        | 0.7758 | 0.0083 |
| 229431_at   | RFXAP     | regulatory factor X-associated protein                                                                                 | 0.4909 | 0.043  |
| 229485_x_at | LOC152573 | hypothetical protein BC012029                                                                                          | 2.9288 | 0.0008 |
| 229491_at   | NHEDC2    | Na <sup>+</sup> /H <sup>+</sup> exchanger domain containing 2                                                          | 0.8008 | 0.0499 |
| 229492_at   | VANGL1    | vang-like 1 (van gogh; Drosophila)                                                                                     | 0.8493 | 0.0044 |
| 229506_at   |           | CDNA clone IMAGE:5263177                                                                                               | 0.8965 | 0.0478 |
| 229512_at   |           | CDNA FLJ43676 fis; clone SYNOV4009129                                                                                  | 1.5804 | 0.0038 |
| 229534_at   | ACOT4     | acyl-CoA thioesterase 4                                                                                                | 0.421  | 0.0358 |



|             |           |                                                                                                                                                                                                        |        |        |
|-------------|-----------|--------------------------------------------------------------------------------------------------------------------------------------------------------------------------------------------------------|--------|--------|
| 229537_at   |           | Transcribed locus; strongly similar to XP_513538.1 similar to LIM domain transcription factor LMO4 (LIM-only protein 4) (LMO-4) (Breast tumor autoantigen) [Pan troglodytes]                           | 0.1565 | 0.008  |
| 229543_at   | FAM26F    | Family with sequence similarity 26; member F                                                                                                                                                           | 0.5245 | 0.0233 |
| 229560_at   | TLR8      | toll-like receptor 8                                                                                                                                                                                   | 1.5985 | 0.0053 |
| 229569_at   |           | CDNA clone IMAGE:5263455                                                                                                                                                                               | 0.2756 | 0.0441 |
| 229580_at   |           | Transcribed locus                                                                                                                                                                                      | 0.6945 | 0.021  |
| 229595_at   | CHCHD4    | coiled-coil-helix-coiled-coil-helix domain containing 4                                                                                                                                                | 0.7225 | 0.0417 |
| 229597_s_at | WDFY4     | WDFY family member 4                                                                                                                                                                                   | 0.3807 | 0.0261 |
| 229603_at   | BBS12     | Bardet-Biedl syndrome 12                                                                                                                                                                               | 1.0561 | 0.0023 |
| 229605_at   | LOC606495 | hypothetical protein LOC606495                                                                                                                                                                         | 0.3188 | 0.0148 |
| 229625_at   | GBP5      | guanylate binding protein 5                                                                                                                                                                            | 0.5477 | 0.0114 |
| 229629_at   |           | Transcribed locus                                                                                                                                                                                      | 0.2488 | 0.0043 |
| 229635_at   |           | CDNA clone IMAGE:4800262                                                                                                                                                                               | 0.7762 | 0.0136 |
| 229657_at   | THRB      | thyroid hormone receptor; beta (erythroblastic leukemia viral (v-erb-a) oncogene homolog 2; avian)                                                                                                     | 0.8795 | 0.0426 |
| 229681_at   |           |                                                                                                                                                                                                        | 0.2162 | 0.0416 |
| 229691_at   |           | Full-length cDNA clone CS0DH005Y118 of T cells (Jurkat cell line) of Homo sapiens (human)                                                                                                              | 0.3482 | 0.0315 |
| 229713_at   |           | Transcribed locus; strongly similar to XP_001145575.1 hypothetical protein [Pan troglodytes]                                                                                                           | 1.3162 | 0.0004 |
| 229743_at   | ZNF438    | zinc finger protein 438                                                                                                                                                                                | 0.4592 | 0.0181 |
| 229776_at   | SLCO3A1   | solute carrier organic anion transporter family; member 3A1                                                                                                                                            | 0.5997 | 0.0002 |
| 229801_at   | C10orf47  | chromosome 10 open reading frame 47                                                                                                                                                                    | 0.4485 | 0.0446 |
| 229803_s_at |           | Transcribed locus                                                                                                                                                                                      | 0.8191 | 0.0418 |
| 229811_at   |           | Transcribed locus; strongly similar to XP_001088798.1 adhesion regulating molecule 1 isoform 1 [Macaca mulatta]                                                                                        | 0.45   | 0.0113 |
| 229815_at   |           | CDNA clone IMAGE:4814828                                                                                                                                                                               | 1.124  | 0.023  |
| 229831_at   | CNTN3     | contactin 3 (plasmacytoma associated)                                                                                                                                                                  | 1.377  | 0.0345 |
| 229842_at   |           |                                                                                                                                                                                                        | 0.1326 | 0.0021 |
| 229844_at   |           | Transcribed locus                                                                                                                                                                                      | 0.5182 | 0.0125 |
| 229864_at   | TMEM103   | Transmembrane protein 103                                                                                                                                                                              | 0.4771 | 0.0156 |
| 229900_at   | CD109     | CD109 molecule                                                                                                                                                                                         | 0.3844 | 0.041  |
| 229905_at   | RAP1GDS1  | RAP1; GTP-GDP dissociation stimulator 1                                                                                                                                                                | 0.8402 | 0.0341 |
| 229906_at   | ARMC7     | armadillo repeat containing 7                                                                                                                                                                          | 0.2871 | 0.0084 |
| 229925_at   | SLC6A17   | solute carrier family 6; member 17                                                                                                                                                                     | 0.8553 | 0.0408 |
| 229929_at   | SPSB4     | splA/ryanodine receptor domain and SOCS box containing 4                                                                                                                                               | 0.3472 | 0.0152 |
| 229934_at   |           | Mir-223 transcript variant 1 mRNA; complete sequence                                                                                                                                                   | 0.2152 | 0.0263 |
| 229937_x_at | LILRB1    | Leukocyte immunoglobulin-like receptor; subfamily B (with TM and ITIM domains); member 1                                                                                                               | 1.1665 | 0.0106 |
| 229940_at   | SETD3     | SET domain containing 3                                                                                                                                                                                | 0.2556 | 0.0474 |
| 229962_at   | LRRC37A3  | leucine rich repeat containing 37; member A3                                                                                                                                                           | 0.6678 | 0.0499 |
| 229968_at   |           | Transcribed locus                                                                                                                                                                                      | 1.161  | 0.0003 |
| 229971_at   | GPR114    | G protein-coupled receptor 114                                                                                                                                                                         | 0.1765 | 0.0101 |
| 229984_at   |           | Transcribed locus                                                                                                                                                                                      | 0.8391 | 0.0021 |
| 229997_at   | VANGL1    | vang-like 1 (van gogh; Drosophila)                                                                                                                                                                     | 0.6247 | 0.0369 |
| 230059_at   | DEAF1     | Deformed epidermal autoregulatory factor 1 (Drosophila)                                                                                                                                                | 0.1462 | 0.048  |
| 230062_at   | KIAA1666  | KIAA1666 protein, similar to Peripheral-type benzodiazepine receptor-associated protein 1 (PRAX-1) (Peripheral benzodiazepine receptor-interacting protein) (PBR-IP) (RIM-binding protein 1) (RIM-BP1) | 0.2631 | 0.0182 |
| 230067_at   | FAM124A   | Family with sequence similarity 124A                                                                                                                                                                   | 0.3412 | 0.0069 |
| 230083_at   | USP53     | ubiquitin specific peptidase 53                                                                                                                                                                        | 1.127  | 0.0466 |
| 230121_at   | C1orf133  | chromosome 1 open reading frame 133                                                                                                                                                                    | 0.3258 | 0.0112 |
| 230157_at   | CDH24     | cadherin-like 24                                                                                                                                                                                       | 0.2752 | 0.0125 |
| 230233_at   |           | Transcribed locus                                                                                                                                                                                      | 1.1538 | 0.0493 |
| 230243_at   | RG9MTD2   | RNA (guanine-9-) methyltransferase domain containing 2                                                                                                                                                 | 0.5805 | 0.0303 |

|             |           |                                                                                                     |        |        |
|-------------|-----------|-----------------------------------------------------------------------------------------------------|--------|--------|
| 230261_at   | ST8SIA4   | ST8 alpha-N-acetyl-neuraminide alpha-2;8-sialyltransferase 4                                        | 0.8216 | 0.0183 |
| 230263_s_at | DOCK5     | dedicator of cytokinesis 5                                                                          | 2.4486 | 0.0042 |
| 230264_s_at | AP1S2     | adaptor-related protein complex 1; sigma 2 subunit                                                  | 0.9512 | 0.0007 |
| 230300_at   |           | CDNA FLJ42315 fis; clone TRACH2019661                                                               | 0.9177 | 0.0412 |
| 230301_at   |           | Transcribed locus                                                                                   | 0.4768 | 0.028  |
| 230309_at   |           | Transcribed locus                                                                                   | 1.5535 | 0.0271 |
| 230329_s_at | NUDT6     | nudix (nucleoside diphosphate linked moiety X)-type motif 6                                         | 1.1299 | 0.032  |
| 230334_at   |           | CDNA clone IMAGE:40078968                                                                           | 0.2535 | 0.036  |
| 230335_at   | C9orf50   | chromosome 9 open reading frame 50                                                                  | 0.1506 | 0.0329 |
| 230376_at   |           | Transcribed locus                                                                                   | 0.4951 | 0.0328 |
| 230383_x_at |           | Transcribed locus                                                                                   | 1.5202 | 0.0072 |
| 230391_at   | CD84      | CD84 molecule                                                                                       | 1.4762 | 0.0084 |
| 230399_at   |           | Transcribed locus                                                                                   | 0.8858 | 0.0098 |
| 230405_at   | LOC441108 | hypothetical gene supported by AK128882                                                             | 0.6787 | 0.0229 |
| 230413_s_at | AP1S2     | Adaptor-related protein complex 1; sigma 2 subunit                                                  | 0.4559 | 0.0262 |
| 230422_at   | FPRL2     | formyl peptide receptor-like 2                                                                      | 1.2418 | 0.0176 |
| 230444_at   |           | Transcribed locus                                                                                   | 0.1624 | 0.0195 |
| 230486_at   |           | Transcribed locus                                                                                   | 0.3717 | 0.0147 |
| 230499_at   |           | Transcribed locus                                                                                   | 0.4008 | 0.0478 |
| 230526_at   |           | CDNA clone IMAGE:5286005                                                                            | 0.16   | 0.0499 |
| 230542_at   | ZNF597    | zinc finger protein 597                                                                             | 0.3182 | 0.0087 |
| 230550_at   | MS4A6A    | membrane-spanning 4-domains; subfamily A; member 6A                                                 | 1.67   | 0.0021 |
| 230557_at   | XRRA1     | X-ray radiation resistance associated 1                                                             | 0.221  | 0.0398 |
| 230560_at   | STXBP6    | syntaxin binding protein 6 (amisyn)                                                                 | 2.1556 | 0.0098 |
| 230566_at   | C22orf27  | chromosome 22 open reading frame 27                                                                 | 0.2645 | 0.0195 |
| 230606_at   | GJC1      | Gap junction protein; chi 1; 31.9kDa                                                                | 1.0486 | 0.0029 |
| 230632_at   |           | Full-length cDNA clone CS0DI051YA02 of Placenta Cot 25-normalized of Homo sapiens (human)           | 0.1648 | 0.0308 |
| 230642_at   |           | Transcribed locus                                                                                   | 0.1326 | 0.0355 |
| 230753_at   | LOC197135 | hypothetical LOC197135                                                                              | 0.2788 | 0.0355 |
| 230773_at   |           | Transcribed locus                                                                                   | 0.2276 | 0.01   |
| 230792_at   | FAAH2     | fatty acid amide hydrolase 2                                                                        | 1.4782 | 0.0078 |
| 230823_at   |           |                                                                                                     | 0.1967 | 0.0289 |
| 230830_at   | OSTbeta   | organic solute transporter beta                                                                     | 0.339  | 0.0125 |
| 230849_at   | KCNA1     | potassium voltage-gated channel; shaker-related subfamily; member 1 (episodic ataxia with myokymia) | 0.1246 | 0.0253 |
| 230860_at   |           | Transcribed locus                                                                                   | 0.568  | 0.0129 |
| 230866_at   | CYSLTR1   | cysteinyl leukotriene receptor 1                                                                    | 0.3294 | 0.0128 |
| 230888_at   | WDR91     | WD repeat domain 91                                                                                 | 0.7633 | 0.0248 |
| 230914_at   | HNF4A     | hepatocyte nuclear factor 4; alpha                                                                  | 0.4101 | 0.0303 |
| 230983_at   | FAM129C   | family with sequence similarity 129; member C                                                       | 0.2121 | 0.0126 |
| 231011_at   | LARP2     | La ribonucleoprotein domain family; member 2                                                        | 0.2123 | 0.0034 |
| 231082_at   | IGL@      | Immunoglobulin lambda locus                                                                         | 0.1541 | 0.0321 |
| 231093_at   | FCRL3     | Fc receptor-like 3                                                                                  | 0.1898 | 0.0108 |
| 231100_at   | RRAD      | Ras-related associated with diabetes                                                                | 0.2266 | 0.0045 |
| 231104_at   | TDRD5     | tudor domain containing 5                                                                           | 0.2894 | 0.0436 |
| 231120_x_at | PKIB      | protein kinase (cAMP-dependent; catalytic) inhibitor beta                                           | 1.0156 | 0.0009 |
| 231145_at   |           | Transcribed locus                                                                                   | 0.2083 | 0.0056 |
| 231184_at   | DHX8      | DEAH (Asp-Glu-Ala-His) box polypeptide 8                                                            | 0.1343 | 0.0221 |
| 231226_at   | LOC728142 | hypothetical protein LOC728142                                                                      | 0.1658 | 0.0432 |
| 231236_at   | ZFP57     | zinc finger protein 57 homolog (mouse)                                                              | 0.2282 | 0.0386 |
| 231283_at   | MGAT4A    | mannosyl (alpha-1;3-)-glycoprotein beta-1;4-N-acetylglucosaminyltransferase; isozyme A              | 0.414  | 0.0001 |
| 231376_at   | UPP2      | uridine phosphorylase 2                                                                             | 0.1272 | 0.0185 |
| 231377_at   | LOC158830 | similar to Ab2-183                                                                                  | 0.1288 | 0.0349 |
| 231382_at   | FGF18     | Fibroblast growth factor 18                                                                         | 0.4935 | 0      |
| 231491_at   | C21orf23  | chromosome 21 open reading frame 23                                                                 | 0.1198 | 0.0039 |
| 231514_at   | C1orf94   | chromosome 1 open reading frame 94                                                                  | 0.3981 | 0.0259 |
| 231528_at   |           | CDNA FLJ30460 fis; clone BRACE2009434                                                               | 0.569  | 0.0041 |

|             |               |                                                                                                                                                                                                    |        |        |
|-------------|---------------|----------------------------------------------------------------------------------------------------------------------------------------------------------------------------------------------------|--------|--------|
| 231603_at   | RNASE11       | ribonuclease; RNase A family; 11 (non-active)                                                                                                                                                      | 0.8281 | 0.0005 |
| 231655_x_at |               |                                                                                                                                                                                                    | 0.129  | 0.0365 |
| 231727_s_at | MIF4GD        | MIF4G domain containing                                                                                                                                                                            | 1.1156 | 0.0178 |
| 231747_at   | CYSLTR1       | cysteinyl leukotriene receptor 1                                                                                                                                                                   | 0.4325 | 0.0097 |
| 231769_at   | FBXO6         | F-box protein 6                                                                                                                                                                                    | 1.4221 | 0.0145 |
| 231776_at   | EOMES         | eomesodermin homolog (Xenopus laevis)                                                                                                                                                              | 0.8053 | 0.0025 |
| 231780_at   | GBGT1         | globoside alpha-1;3-N-acetylgalactosaminyltransferase 1                                                                                                                                            | 1.1619 | 0.0465 |
| 231790_at   | DMGDH         | dimethylglycine dehydrogenase                                                                                                                                                                      | 0.6855 | 0.0123 |
| 231817_at   | USP53         | ubiquitin specific peptidase 53                                                                                                                                                                    | 1.4318 | 0.0166 |
| 231824_at   | LARP2         | La ribonucleoprotein domain family; member 2                                                                                                                                                       | 0.5683 | 0.0044 |
| 231849_at   | KRT80         | keratin 80                                                                                                                                                                                         | 2.0722 | 0.0023 |
| 231871_at   | GPR180        | G protein-coupled receptor 180                                                                                                                                                                     | 0.5497 | 0.0438 |
| 231912_s_at | DKFZP434B0335 | DKFZP434B0335 protein                                                                                                                                                                              | 0.5531 | 0.0049 |
| 231913_s_at | BRCC3         | BRCA1/BRCA2-containing complex; subunit 3                                                                                                                                                          | 1.1249 | 0.028  |
| 231929_at   | IKZF2         | IKAROS family zinc finger 2 (Helios)                                                                                                                                                               | 1.1544 | 0.0385 |
| 232024_at   | GIMAP2        | GTPase; IMAP family member 2                                                                                                                                                                       | 1.4677 | 0.0206 |
| 232036_at   | KLC1          | Kinesin light chain 1                                                                                                                                                                              | 0.358  | 0.0148 |
| 232067_at   | C6orf168      | chromosome 6 open reading frame 168                                                                                                                                                                | 0.6279 | 0.0033 |
| 232068_s_at | TLR4          | toll-like receptor 4                                                                                                                                                                               | 0.3597 | 0.0313 |
| 232072_at   |               |                                                                                                                                                                                                    | 0.308  | 0.0133 |
| 232154_at   | LOC199800     | hypothetical protein LOC199800                                                                                                                                                                     | 0.4767 | 0.001  |
| 232197_x_at | ARSB          | arylsulfatase B                                                                                                                                                                                    | 0.3194 | 0.0261 |
| 232209_x_at | HM13          | histocompatibility (minor) 13                                                                                                                                                                      | 0.3649 | 0.043  |
| 232311_at   | B2M           | Beta-2-microglobulin                                                                                                                                                                               | 0.5171 | 0.0055 |
| 232364_at   | FBXO11        | F-box protein 11                                                                                                                                                                                   | 0.1329 | 0.0429 |
| 232378_at   | SLC5A9        | solute carrier family 5 (sodium/glucose cotransporter); member 9                                                                                                                                   | 0.1985 | 0.0468 |
| 232383_at   | TFEC          | transcription factor EC                                                                                                                                                                            | 0.4344 | 0.0078 |
| 232403_at   | SPG11         | spastic paraplegia 11 (autosomal recessive)                                                                                                                                                        | 0.2881 | 0.019  |
| 232434_at   | DIRC3         | disrupted in renal carcinoma 3                                                                                                                                                                     | 0.2454 | 0.0358 |
| 232504_at   |               |                                                                                                                                                                                                    | 0.2447 | 0.0038 |
| 232513_x_at | C20orf107     | chromosome 20 open reading frame 107                                                                                                                                                               | 0.1009 | 0.0487 |
| 232543_x_at | ARHGAP9       | Rho GTPase activating protein 9                                                                                                                                                                    | 0.8966 | 0.0104 |
| 232574_at   | XYLT1         | xylosyltransferase I                                                                                                                                                                               | 0.1284 | 0.0342 |
| 232667_at   |               | CDNA FLJ13690 fis; clone PLACE2000097                                                                                                                                                              | 0.2473 | 0.0036 |
| 232687_at   |               | CDNA FLJ33091 fis; clone TRACH2000660                                                                                                                                                              | 0.5344 | 0.0023 |
| 232724_at   | MS4A6A        | membrane-spanning 4-domains; subfamily A; member 6A                                                                                                                                                | 0.4413 | 0.0081 |
| 232785_at   | RGAG1         | retrotransposon gag domain containing 1                                                                                                                                                            | 0.2738 | 0.0096 |
| 232792_at   | TRIM69        | tripartite motif-containing 69                                                                                                                                                                     | 0.647  | 0.0199 |
| 232798_at   | DNAJC5B       | DnaJ (Hsp40) homolog; subfamily C; member 5 beta                                                                                                                                                   | 0.3559 | 0.0207 |
| 232821_at   | FAM112A       | family with sequence similarity 112; member A                                                                                                                                                      | 0.1444 | 0.0143 |
| 232827_at   |               | Clone L50 polyadenylated HERV LTR sequence and flanking cellular sequence; mRNA                                                                                                                    | 0.6809 | 0.0294 |
| 232959_at   | LOC645513     | similar to septin 7                                                                                                                                                                                | 0.1873 | 0.0391 |
| 232977_x_at | MYH14         | myosin; heavy chain 14                                                                                                                                                                             | 0.55   | 0.0044 |
| 232986_at   | ZNF233        | zinc finger protein 233                                                                                                                                                                            | 0.3125 | 0.0215 |
| 233052_at   | DNAH8         | dynein; axonemal; heavy chain 8                                                                                                                                                                    | 0.1462 | 0.0101 |
| 233146_at   | KNDC1         | kinase non-catalytic C-lobe domain (KIND) containing 1                                                                                                                                             | 0.2012 | 0.0346 |
| 233216_at   | ZDHHC21       | zinc finger; DHHC-type containing 21                                                                                                                                                               | 0.2095 | 0.0147 |
| 233218_at   |               | CDNA FLJ12177 fis; clone MAMMA1000720                                                                                                                                                              | 0.1281 | 0.0325 |
| 233220_at   | GRIN3A        | glutamate receptor; ionotropic; N-methyl-D-aspartate 3A                                                                                                                                            | 0.1186 | 0.0162 |
| 233256_at   |               | CDNA: FLJ21297 fis; clone COL02035                                                                                                                                                                 | 0.118  | 0.0485 |
| 233334_x_at | GIYD1         | GIY-YIG domain containing 1, GIY-YIG domain containing 2, sulfotransferase family; cytosolic; 1A; phenol-preferring; member 3, sulfotransferase family; cytosolic; 1A; phenol-preferring; member 4 | 0.5846 | 0.0296 |
| 233491_at   |               |                                                                                                                                                                                                    | 0.2038 | 0.0029 |
| 233510_s_at | PARVG         | parvin; gamma                                                                                                                                                                                      | 0.5414 | 0.0094 |
| 233520_s_at | CMYA5         | cardiomyopathy associated 5                                                                                                                                                                        | 0.2199 | 0.0088 |
| 233557_s_at | MON1B         | MON1 homolog B (yeast)                                                                                                                                                                             | 0.7854 | 0.0042 |

|             |           |                                                                                                                                    |        |        |
|-------------|-----------|------------------------------------------------------------------------------------------------------------------------------------|--------|--------|
| 233592_at   | ANKRD18A  | ankyrin repeat domain 18A, ankyrin repeat domain 19, hypothetical LOC643133                                                        | 0.1359 | 0.0476 |
| 233612_at   |           | CDNA FLJ12420 fis; clone MAMMA1003049                                                                                              | 0.1284 | 0.0394 |
| 233725_at   |           |                                                                                                                                    | 0.189  | 0.0009 |
| 233744_at   |           | Uncharacterized gastric protein ZG33P                                                                                              | 0.1829 | 0.0404 |
| 233809_at   | HYPK      | Huntingtin interacting protein K                                                                                                   | 0.2558 | 0.0231 |
| 233825_s_at | CD99L2    | CD99 molecule-like 2                                                                                                               | 1.0894 | 0.0337 |
| 233857_s_at | ASB2      | ankyrin repeat and SOCS box-containing 2                                                                                           | 0.2584 | 0.0014 |
| 233864_s_at | VPS35     | vacuolar protein sorting 35 homolog ( <i>S. cerevisiae</i> )                                                                       | 0.3308 | 0.0368 |
| 233969_at   | IGL@      | Immunoglobulin lambda light chain, Immunoglobulin lambda locus                                                                     | 0.151  | 0.0019 |
| 234072_at   | SEMA4A    | sema domain; immunoglobulin domain (Ig); transmembrane domain (TM) and short cytoplasmic domain; (semaphorin) 4A                   | 0.1398 | 0.0233 |
| 234100_at   |           | CDNA FLJ13402 fis; clone PLACE1001456                                                                                              | 0.1141 | 0.0137 |
| 234147_at   | LOC286059 | hypothetical protein LOC286059                                                                                                     | 0.1007 | 0.0474 |
| 234165_at   | PTGDR     | prostaglandin D2 receptor (DP)                                                                                                     | 0.7209 | 0.0248 |
| 234269_at   |           | CDNA FLJ20012 fis; clone ADKA03438                                                                                                 | 0.1602 | 0.0158 |
| 234273_at   |           | MRNA; cDNA DKFZp434M031 (from clone DKFZp434M031)                                                                                  | 0.1477 | 0.0231 |
| 234290_x_at | MYH14     | myosin; heavy chain 14                                                                                                             | 0.5064 | 0.0169 |
| 234294_x_at | GATAD2A   | GATA zinc finger domain containing 2A                                                                                              | 0.7901 | 0.0029 |
| 234295_at   | DBR1      | debranching enzyme homolog 1 ( <i>S. cerevisiae</i> )                                                                              | 0.731  | 0.0056 |
| 234304_s_at | IPO11     | importin 11                                                                                                                        | 0.8442 | 0.0316 |
| 234305_s_at | MLZE      | melanoma-derived leucine zipper; extra-nuclear factor                                                                              | 0.2721 | 0.0063 |
| 234336_s_at | TTLL9     | tubulin tyrosine ligase-like family; member 9                                                                                      | 0.1427 | 0.0024 |
| 234349_at   | SSPO      | SCO-spondin homolog ( <i>Bos taurus</i> )                                                                                          | 0.1471 | 0.0458 |
| 234362_s_at | CTLA4     | cytotoxic T-lymphocyte-associated protein 4                                                                                        | 0.1704 | 0.0392 |
| 234386_s_at | C15orf49  | chromosome 15 open reading frame 49                                                                                                | 0.1043 | 0.0493 |
| 234434_at   |           | MRNA; cDNA DKFZp434F0535 (from clone DKFZp434F0535)                                                                                | 0.1287 | 0.0425 |
| 234446_at   |           | MRNA; cDNA DKFZp434O0212 (from clone DKFZp434O0212)                                                                                | 0.2116 | 0.012  |
| 234460_at   |           |                                                                                                                                    | 0.1231 | 0.0407 |
| 234471_s_at | NCOA5     | nuclear receptor coactivator 5                                                                                                     | 0.4325 | 0.0357 |
| 234561_at   | SLC2A13   | solute carrier family 2 (facilitated glucose transporter); member 13                                                               | 0.1097 | 0.0196 |
| 234631_at   | KRTAP4-8  | keratin associated protein 4-8                                                                                                     | 0.1595 | 0.027  |
| 234653_at   | LOC649898 | Similar to NACHT-; LRR- and PYD-containing protein 2 (PYRIN-containing APAF1-like protein 2) (Nucleotide-binding site protein 1)   | 0.2047 | 0.0183 |
| 234657_at   |           | CDNA: FLJ23521 fis; clone LNG04928                                                                                                 | 0.1494 | 0.0216 |
| 234770_at   |           |                                                                                                                                    | 0.1083 | 0.0401 |
| 234797_at   |           |                                                                                                                                    | 0.1567 | 0.0106 |
| 234903_at   | OR2B3     | olfactory receptor; family 2; subfamily B; member 3                                                                                | 0.1023 | 0.0282 |
| 234956_at   | LOC93444  | hypothetical protein LOC93444                                                                                                      | 0.1814 | 0.0284 |
| 234986_at   | GCLM      | glutamate-cysteine ligase; modifier subunit                                                                                        | 0.8805 | 0.0074 |
| 235096_at   | LEO1      | Leo1; Paf1/RNA polymerase II complex component; homolog ( <i>S. cerevisiae</i> )                                                   | 0.5338 | 0.0329 |
| 235133_at   |           | Homo sapiens; clone IMAGE:5787583; mRNA                                                                                            | 0.3215 | 0.0441 |
| 235175_at   | GBP4      | guanylate binding protein 4                                                                                                        | 0.5109 | 0.01   |
| 235199_at   | RNF125    | ring finger protein 125                                                                                                            | 0.8902 | 0      |
| 235229_at   |           | Transcribed locus; weakly similar to XP_001117086.1 similar to Olfactory receptor 10T2 (Olfactory receptor OR1-3) [Macaca mulatta] | 0.3213 | 0.0469 |
| 235249_at   | RDH13     | Retinol dehydrogenase 13 (all-trans/9-cis)                                                                                         | 0.1366 | 0.0295 |
| 235296_at   | EIF5A2    | eukaryotic translation initiation factor 5A2                                                                                       | 0.9924 | 0.0104 |
| 235299_at   |           | Transcribed locus                                                                                                                  | 1.0651 | 0.0359 |
| 235346_at   | FUNDC1    | FUN14 domain containing 1                                                                                                          | 0.7308 | 0.0238 |
| 235353_at   | KIAA0746  | KIAA0746 protein                                                                                                                   | 0.3488 | 0.0136 |
| 235385_at   |           | CDNA FLJ34016 fis; clone FCBBF2002541                                                                                              | 1.0627 | 0.0069 |
| 235396_at   | C22orf25  | chromosome 22 open reading frame 25                                                                                                | 0.7    | 0.0004 |

|             |           |                                                                                             |        |        |
|-------------|-----------|---------------------------------------------------------------------------------------------|--------|--------|
| 235397_at   | LOC285908 | hypothetical protein LOC285908                                                              | 0.2031 | 0.0312 |
| 235403_at   |           | Transcribed locus                                                                           | 0.1509 | 0.0089 |
| 235437_at   |           | Transcribed locus                                                                           | 0.2053 | 0.0253 |
| 235458_at   | HAVCR2    | hepatitis A virus cellular receptor 2                                                       | 1.2875 | 0.0076 |
| 235517_at   | C4orf28   | chromosome 4 open reading frame 28                                                          | 0.2896 | 0.0336 |
| 235523_at   |           | Transcribed locus                                                                           | 0.1374 | 0.0344 |
| 235552_at   | KIAA1627  | KIAA1627 protein                                                                            | 0.4439 | 0.044  |
| 235565_at   | ZNF425    | Zinc finger protein 425                                                                     | 0.125  | 0.0081 |
| 235651_at   |           |                                                                                             | 0.2333 | 0.0236 |
| 235661_at   |           | Transcribed locus                                                                           | 0.3067 | 0.0487 |
| 235667_at   | LOC643783 | hypothetical LOC643783                                                                      | 0.4817 | 0.0015 |
| 235675_at   | DHFRL1    | dihydrofolate reductase-like 1                                                              | 0.6992 | 0.0037 |
| 235689_at   | MTFMT     | mitochondrial methionyl-tRNA formyltransferase                                              | 0.851  | 0.0259 |
| 235696_at   |           | CDNA clone IMAGE:4837650                                                                    | 1.4486 | 0.0122 |
| 235733_at   |           | Transcribed locus                                                                           | 0.7472 | 0.0067 |
| 235736_at   |           | Homo sapiens; clone IMAGE:5167600; mRNA                                                     | 0.7531 | 0.0034 |
| 235740_at   |           | Transcribed locus                                                                           | 1.139  | 0.0052 |
| 235751_s_at | VMO1      | vitelline membrane outer layer 1 homolog (chicken)                                          | 0.638  | 0.0299 |
| 235754_at   | HFE       | hemochromatosis                                                                             | 0.5259 | 0.0324 |
| 235756_at   |           | CDNA FLJ26187 fis; clone ADG04782                                                           | 0.4225 | 0.0014 |
| 235766_x_at |           | CDNA clone IMAGE:5745639                                                                    | 1.3687 | 0.0134 |
| 235770_at   | MASP1     | mannan-binding lectin serine peptidase 1 (C4/C2 activating component of Ra-reactive factor) | 0.5279 | 0.0239 |
| 235812_at   | TMEM188   | transmembrane protein 188                                                                   | 0.5007 | 0.0488 |
| 235857_at   | KCTD11    | potassium channel tetramerisation domain containing 11                                      | 0.4465 | 0.047  |
| 235864_at   | MPP5      | Membrane protein; palmitoylated 5 (MAGUK p55 subfamily member 5)                            | 0.5492 | 0.0015 |
| 235870_at   | LOC339524 | hypothetical protein LOC339524                                                              | 0.1411 | 0.0427 |
| 235900_at   | SPNS3     | spinster homolog 3 (Drosophila)                                                             | 0.3038 | 0.012  |
| 235939_at   |           | CDNA FLJ36815 fis; clone ASTRO2003740                                                       | 0.6118 | 0.0203 |
| 235981_at   | C8orf22   | chromosome 8 open reading frame 22                                                          | 0.1182 | 0.0333 |
| 236001_at   | LOC400573 | hypothetical gene supported by BC015790; BC041634                                           | 0.2185 | 0.0115 |
| 236018_at   |           |                                                                                             | 0.2925 | 0.0373 |
| 236029_at   | FAT3      | FAT tumor suppressor homolog 3 (Drosophila)                                                 | 0.4675 | 0.0242 |
| 236085_at   | CAPSL     | calcyphosine-like                                                                           | 0.2369 | 0.0171 |
| 236086_at   |           | Transcribed locus                                                                           | 0.1334 | 0.0291 |
| 236125_at   |           | CDNA FLJ31332 fis; clone MAMGL1000096                                                       | 0.3642 | 0.0316 |
| 236140_at   | GCLM      | glutamate-cysteine ligase; modifier subunit                                                 | 0.5    | 0.0442 |
| 236141_at   | NBLA00301 | putative protein product of Nbla00301                                                       | 0.1435 | 0.0205 |
| 236148_at   |           | Full length insert cDNA clone YA80A03                                                       | 0.2334 | 0.0314 |
| 236150_at   | LOC123688 | similar to RIKEN cDNA C630028N24 gene                                                       | 0.3439 | 0.0448 |
| 236165_at   | MSL3L1    | male-specific lethal 3-like 1 (Drosophila)                                                  | 0.19   | 0.0365 |
| 236190_at   | XYLT1     | Xylosyltransferase I                                                                        | 0.8847 | 0.0465 |
| 236193_at   | HIST1H2BC | histone cluster 1; H2bc                                                                     | 0.8709 | 0.0257 |
| 236219_at   | TMEM20    | transmembrane protein 20                                                                    | 0.3644 | 0.0274 |
| 236228_at   |           | Clone pp7583 unknown mRNA                                                                   | 0.2406 | 0.0151 |
| 236262_at   | MMRN2     | multimerin 2                                                                                | 1.4808 | 0.0378 |
| 236280_at   |           | Transcribed locus                                                                           | 0.3684 | 0.006  |
| 236283_x_at | PAK2      | p21 (CDKN1A)-activated kinase 2                                                             | 0.3842 | 0.0423 |
| 236295_s_at | NLRC3     | NLR family; CARD domain containing 3                                                        | 0.4826 | 0.0054 |
| 236347_at   | MMAA      | methylmalonic aciduria (cobalamin deficiency) cblA type                                     | 0.5935 | 0.0114 |
| 236398_s_at |           | Homo sapiens; clone IMAGE:3896086; mRNA                                                     | 0.2294 | 0.0494 |
| 236407_at   | KCNE1     | potassium voltage-gated channel; Isk-related family; member 1                               | 0.1403 | 0.0425 |
| 236434_at   | PES1      | pescadillo homolog 1; containing BRCT domain (zebrafish)                                    | 0.201  | 0.0038 |
| 236442_at   | DPF3      | D4; zinc and double PHD fingers; family 3                                                   | 0.556  | 0.0288 |
| 236445_at   | LOC731986 | similar to cytochrome P450 monooxygenase CYP2T1                                             | 0.1675 | 0.0383 |
| 236464_at   |           | Transcribed locus                                                                           | 0.1933 | 0.002  |
| 236506_at   |           | Transcribed locus                                                                           | 0.7035 | 0.0016 |
| 236527_at   |           | Transcribed locus                                                                           | 0.7144 | 0.0435 |

|             |           |                                                                                                     |        |        |
|-------------|-----------|-----------------------------------------------------------------------------------------------------|--------|--------|
| 236539_at   | PTPN22    | protein tyrosine phosphatase; non-receptor type 22 (lymphoid)                                       | 0.3112 | 0.0213 |
| 236595_at   |           |                                                                                                     | 0.2132 | 0.0213 |
| 236627_at   |           | Transcribed locus                                                                                   | 0.1876 | 0.0136 |
| 236721_at   | ALKBH1    | alkB; alkylation repair homolog 1 (E. coli)                                                         | 0.3634 | 0.0177 |
| 236787_at   |           | CDNA FLJ35091 fis; clone PLACE6005786                                                               | 0.3125 | 0.0344 |
| 236835_at   | LOC645431 | hypothetical protein LOC645431                                                                      | 0.3434 | 0.0116 |
| 236891_at   |           |                                                                                                     | 0.1631 | 0.0041 |
| 236921_at   |           | Transcribed locus                                                                                   | 0.997  | 0.0328 |
| 236927_at   | SVEP1     | sushi; von Willebrand factor type A; EGF and pentraxin domain containing 1                          | 0.2401 | 0.0414 |
| 236954_at   | BOLL      | bol; boule-like (Drosophila)                                                                        | 0.2106 | 0.0028 |
| 236987_at   |           |                                                                                                     | 0.1624 | 0.0252 |
| 236995_x_at | TFEC      | transcription factor EC                                                                             | 0.2691 | 0.0244 |
| 237003_at   | BEST3     | bestrophin 3                                                                                        | 0.3908 | 0.0039 |
| 237083_at   |           | Transcribed locus                                                                                   | 0.6627 | 0.0237 |
| 237115_at   |           | Transcribed locus; strongly similar to XP_530679.1 hypothetical protein XP_530679 [Pan troglodytes] | 0.1769 | 0.0127 |
| 237117_at   | LOC727930 | similar to CG10275-PA                                                                               | 0.1852 | 0.0158 |
| 237133_at   |           | Transcribed locus                                                                                   | 0.1345 | 0.0052 |
| 237201_at   |           | Transcribed locus                                                                                   | 0.218  | 0.0011 |
| 237240_at   |           | Transcribed locus                                                                                   | 0.202  | 0.0104 |
| 237276_at   | NASP      | Nuclear autoantigenic sperm protein (histone-binding)                                               | 0.1609 | 0.0368 |
| 237293_at   |           | Transcribed locus                                                                                   | 0.1786 | 0.0408 |
| 237320_at   | FAM137B   | family with sequence similarity 137; member B                                                       | 0.2127 | 0.0423 |
| 237339_at   | hCG_25653 | hCG25653                                                                                            | 0.182  | 0.0099 |
| 237354_at   | PDXDC1    | pyridoxal-dependent decarboxylase domain containing 1                                               | 0.1181 | 0.0318 |
| 237363_at   | C9orf68   | chromosome 9 open reading frame 68                                                                  | 0.2008 | 0.0342 |
| 237372_at   |           | Transcribed locus                                                                                   | 0.3201 | 0.0182 |
| 237423_at   | RSPO4     | R-spondin family; member 4                                                                          | 0.1456 | 0.0357 |
| 237440_at   |           | Transcribed locus                                                                                   | 0.308  | 0.0132 |
| 237486_at   |           | Transcribed locus                                                                                   | 0.1269 | 0.0426 |
| 237595_at   | LMX1A     | LIM homeobox transcription factor 1; alpha                                                          | 0.1408 | 0.0169 |
| 237638_at   |           |                                                                                                     | 0.1051 | 0.0448 |
| 237690_at   | GPR115    | G protein-coupled receptor 115                                                                      | 0.6125 | 0.003  |
| 237694_at   |           | Transcribed locus                                                                                   | 0.1345 | 0.0243 |
| 237710_at   |           | Transcribed locus                                                                                   | 0.1652 | 0.0455 |
| 237712_at   |           | Transcribed locus; strongly similar to XP_001142191.1 hypothetical protein [Pan troglodytes]        | 0.1731 | 0.033  |
| 237722_at   | FLI1      | Friend leukemia virus integration 1                                                                 | 0.1329 | 0.0339 |
| 237759_at   | CD48      | CD48 molecule                                                                                       | 0.4937 | 0.0127 |
| 237807_at   | SPATA12   | spermatogenesis associated 12                                                                       | 0.2631 | 0.0306 |
| 237814_at   |           | Transcribed locus                                                                                   | 0.2181 | 0.0008 |
| 237837_at   |           | Transcribed locus                                                                                   | 0.1398 | 0.0423 |
| 237967_at   | HAL       | Histidine ammonia-lyase                                                                             | 0.1194 | 0.0255 |
| 238002_at   | GOLIM4    | golgi integral membrane protein 4                                                                   | 0.4947 | 0.0253 |
| 238005_s_at |           | Transcribed locus                                                                                   | 1.117  | 0.0107 |
| 238045_at   | TMEM65    | transmembrane protein 65                                                                            | 0.2894 | 0.0215 |
| 238053_at   | DHRSX     | dehydrogenase/reductase (SDR family) X-linked                                                       | 0.4495 | 0.0285 |
| 238078_at   |           | Transcribed locus                                                                                   | 0.268  | 0.0406 |
| 238088_at   |           | CDNA clone IMAGE:5259414                                                                            | 0.151  | 0.0179 |
| 238142_at   |           | CDNA FLJ37584 fis; clone BRCOC2004950                                                               | 1.1428 | 0.0029 |
| 238143_at   | LOC646627 | phospholipase inhibitor                                                                             | 0.1078 | 0.0196 |
| 238171_at   | SLC25A30  | solute carrier family 25; member 30                                                                 | 0.1419 | 0.0123 |
| 238187_at   | C2orf57   | chromosome 2 open reading frame 57                                                                  | 0.1234 | 0.0497 |
| 238190_at   | TUFM      | Tu translation elongation factor; mitochondrial                                                     | 0.4284 | 0.0337 |
| 238195_at   |           | Full length insert cDNA YI09H09                                                                     | 0.1096 | 0.0404 |
| 238250_at   |           | Transcribed locus                                                                                   | 0.1495 | 0.0137 |
| 238376_at   |           | CDNA FLJ30967 fis; clone HEART2000309; weakly similar to PTB-ASSOCIATED SPLICING FACTOR             | 0.9192 | 0.0042 |
| 238430_x_at | SLFN5     | schlafen family member 5                                                                            | 1.2237 | 0.0215 |

|             |           |                                                                                                                                                                                   |        |        |
|-------------|-----------|-----------------------------------------------------------------------------------------------------------------------------------------------------------------------------------|--------|--------|
| 238451_at   | MPP7      | membrane protein; palmitoylated 7 (MAGUK p55 subfamily member 7)                                                                                                                  | 0.8099 | 0.0303 |
| 238462_at   | STS-1     | Cbl-interacting protein Sts-1                                                                                                                                                     | 0.3459 | 0.0113 |
| 238465_at   | C5orf35   | chromosome 5 open reading frame 35                                                                                                                                                | 1.1744 | 0.011  |
| 238466_at   |           | CDNA FLJ33443 fis; clone BRALZ1000103                                                                                                                                             | 1.4335 | 0.0151 |
| 238467_at   |           | CDNA FLJ41419 fis; clone BRHIP2002339                                                                                                                                             | 1.187  | 0.0152 |
| 238518_x_at | GLYCTK    | glycerate kinase                                                                                                                                                                  | 0.259  | 0.0382 |
| 238533_at   | EPHA7     | EPH receptor A7                                                                                                                                                                   | 0.3531 | 0.0192 |
| 238567_at   | SGPP2     | sphingosine-1-phosphate phosphatase 2                                                                                                                                             | 1.392  | 0.0269 |
| 238581_at   | GBP5      | guanylate binding protein 5                                                                                                                                                       | 0.4262 | 0.0093 |
| 238587_at   | STS-1     | Cbl-interacting protein Sts-1                                                                                                                                                     | 0.2814 | 0.033  |
| 238606_at   | ZNF747    | zinc finger protein 747                                                                                                                                                           | 0.5707 | 0.0341 |
| 238622_at   | RAP2B     | RAP2B; member of RAS oncogene family                                                                                                                                              | 0.4933 | 0.0124 |
| 238668_at   |           | Transcribed locus                                                                                                                                                                 | 0.9616 | 0.0172 |
| 238681_at   | GDPD1     | glycerophosphodiester phosphodiesterase domain containing 1                                                                                                                       | 1.1184 | 0.0461 |
| 238692_at   | BTBD11    | BTB (POZ) domain containing 11                                                                                                                                                    | 1.2424 | 0.025  |
| 238725_at   |           |                                                                                                                                                                                   | 0.9604 | 0.0499 |
| 238821_at   | CSTF2     | Cleavage stimulation factor; 3' pre-RNA; subunit 2; 64kDa                                                                                                                         | 0.4307 | 0.0084 |
| 238846_at   | TNFRSF11A | tumor necrosis factor receptor superfamily; member 11a; NFkB activator                                                                                                            | 0.7585 | 0.0143 |
| 238923_at   | SPOP      | speckle-type POZ protein                                                                                                                                                          | 0.353  | 0.0232 |
| 238948_at   | TM9SF1    | Transmembrane 9 superfamily member 1                                                                                                                                              | 0.3481 | 0.0466 |
| 238976_at   |           |                                                                                                                                                                                   | 0.1205 | 0.0113 |
| 239021_at   |           | Transcribed locus; moderately similar to XP_530714.1 hypothetical protein XP_530714 [Pan troglodytes]                                                                             | 0.2925 | 0.0311 |
| 239053_at   | CIAO1     | Cytosolic iron-sulfur protein assembly 1 homolog (S. cerevisiae)                                                                                                                  | 0.3123 | 0.0462 |
| 239072_at   | LOC647121 | similar to embigin homolog                                                                                                                                                        | 0.885  | 0.0136 |
| 239098_at   | KCNRG     | potassium channel regulator                                                                                                                                                       | 0.2026 | 0.0101 |
| 239155_at   | LOC653108 | similar to coxsackie virus and adenovirus receptor precursor                                                                                                                      | 0.596  | 0.014  |
| 239196_at   | ANKRD22   | ankyrin repeat domain 22                                                                                                                                                          | 0.3844 | 0.033  |
| 239205_s_at | CR1       | complement component (3b/4b) receptor 1 (Knops blood group), complement component (3b/4b) receptor 1-like, similar to complement component (3b/4b) receptor 1 isoform F precursor | 0.4383 | 0.0186 |
| 239231_at   |           | CDNA FLJ41910 fis; clone PEBLM2007834                                                                                                                                             | 0.7909 | 0.0164 |
| 239287_at   |           | Transcribed locus                                                                                                                                                                 | 0.5444 | 0.0486 |
| 239294_at   |           | Transcribed locus                                                                                                                                                                 | 0.9986 | 0.0094 |
| 239302_s_at |           | MRNA; cDNA DKFZp686P18215 (from clone DKFZp686P18215)                                                                                                                             | 0.7334 | 0.0142 |
| 239319_at   | LOC728342 | Hypothetical protein LOC728342                                                                                                                                                    | 0.3919 | 0.0337 |
| 239328_at   |           | CDNA FLJ35362 fis; clone SKMUS2000330                                                                                                                                             | 0.1626 | 0.042  |
| 239342_at   | DGKZ      | diacylglycerol kinase; zeta 104kDa                                                                                                                                                | 0.2104 | 0.0464 |
| 239374_at   | TRIM65    | Tripartite motif-containing 65                                                                                                                                                    | 0.1143 | 0.0406 |
| 239424_at   |           |                                                                                                                                                                                   | 0.1141 | 0.0213 |
| 239431_at   | TICAM2    | toll-like receptor adaptor molecule 2                                                                                                                                             | 0.7231 | 0.0055 |
| 239529_at   | C5orf20   | chromosome 5 open reading frame 20                                                                                                                                                | 0.1686 | 0.0276 |
| 239537_at   | ST8SIA2   | ST8 alpha-N-acetyl-neuraminide alpha-2,8-sialyltransferase 2                                                                                                                      | 0.3958 | 0.0419 |
| 239583_x_at | PLAC7     | placenta-specific 7                                                                                                                                                               | 0.176  | 0.0318 |
| 239594_at   | LOC145837 | hypothetical protein LOC145837                                                                                                                                                    | 0.2122 | 0.0088 |
| 239606_at   |           | CDNA FLJ25345 fis; clone TST01118                                                                                                                                                 | 0.1299 | 0.0207 |
| 239624_at   | LOC730259 | hypothetical protein LOC730259                                                                                                                                                    | 2.2689 | 0.0027 |
| 239648_at   | DCUN1D3   | DCN1; defective in cullin neddylation 1; domain containing 3 (S. cerevisiae)                                                                                                      | 0.7109 | 0.008  |
| 239652_at   |           | Transcribed locus                                                                                                                                                                 | 0.1804 | 0.0067 |
| 239706_x_at | PLAC7     | Placenta-specific 7                                                                                                                                                               | 0.1744 | 0.0249 |
| 239719_at   | CD109     | CD109 molecule                                                                                                                                                                    | 0.1553 | 0.035  |
| 239777_at   | LOC283551 | hypothetical protein LOC283551                                                                                                                                                    | 1.1913 | 0.0285 |

|             |                 |                                                                                                                |        |        |
|-------------|-----------------|----------------------------------------------------------------------------------------------------------------|--------|--------|
| 239781_at   | hCG_181550<br>4 | hCG1815504                                                                                                     | 0.1604 | 0.0214 |
| 239822_at   |                 | CDNA clone IMAGE:4816129                                                                                       | 0.1565 | 0.0052 |
| 239835_at   | KBTBD8          | kelch repeat and BTB (POZ) domain containing 8                                                                 | 0.9837 | 0.0023 |
| 239854_at   | LOC644186       | hypothetical protein LOC644186                                                                                 | 0.5108 | 0.0268 |
| 239888_at   |                 |                                                                                                                | 1.1375 | 0.001  |
| 239915_at   | LOC285944       | hypothetical protein LOC285944                                                                                 | 0.392  | 0.0388 |
| 239982_at   |                 | CDNA clone IMAGE:4831215                                                                                       | 0.152  | 0.0247 |
| 240013_at   |                 | Transcribed locus                                                                                              | 0.2436 | 0.0144 |
| 240015_at   |                 | Transcribed locus                                                                                              | 0.2522 | 0.0265 |
| 240017_at   | LOC400960       | Hypothetical gene supported by BC040598                                                                        | 0.1605 | 0.0447 |
| 240064_at   |                 | Transcribed locus; strongly similar to XP_529518.1 hypothetical protein XP_529518 [Pan troglodytes]            | 0.3646 | 0.0003 |
| 240106_at   | GNPTAB          | N-acetylglucosamine-1-phosphate transferase; alpha and beta subunits                                           | 0.4443 | 0.0088 |
| 240162_at   |                 | CDNA clone IMAGE:4830758                                                                                       | 0.1473 | 0.0383 |
| 240173_at   |                 | Transcribed locus                                                                                              | 0.4577 | 0.0151 |
| 240196_at   |                 | Transcribed locus                                                                                              | 0.1576 | 0.0443 |
| 240266_at   |                 | Transcribed locus                                                                                              | 0.1219 | 0.0322 |
| 240333_at   |                 | Transcribed locus                                                                                              | 0.1548 | 0.0496 |
| 240342_at   | TRIM61          | tripartite motif-containing 61                                                                                 | 0.5111 | 0.0098 |
| 240379_at   |                 | Transcribed locus                                                                                              | 0.1392 | 0.0464 |
| 240411_at   | FLJ40243        | hypothetical protein FLJ40243                                                                                  | 0.1258 | 0.0085 |
| 240413_at   | PYHIN1          | pyrin and HIN domain family; member 1                                                                          | 0.2257 | 0.0035 |
| 240523_at   |                 | Homo sapiens; Similar to LOC161538; clone IMAGE:5199550; mRNA                                                  | 0.589  | 0.0001 |
| 240533_at   |                 |                                                                                                                | 0.1747 | 0.0091 |
| 240555_at   |                 |                                                                                                                | 0.1395 | 0.0326 |
| 240559_at   | C19orf41        | chromosome 19 open reading frame 41                                                                            | 0.4817 | 0.0457 |
| 240561_at   |                 | CDNA FLJ38120 fis; clone D3OST3000195                                                                          | 0.1912 | 0.0199 |
| 240603_s_at | EXOD1           | exonuclease domain containing 1                                                                                | 0.1209 | 0.0359 |
| 240663_at   |                 | Transcribed locus                                                                                              | 0.1111 | 0.0341 |
| 240747_at   |                 | Transcribed locus                                                                                              | 0.155  | 0.0041 |
| 240844_at   |                 | Transcribed locus                                                                                              | 0.11   | 0.0389 |
| 240854_x_at |                 |                                                                                                                | 0.2115 | 0.0472 |
| 240857_at   | DNAH9           | dynein; axonemal; heavy chain 9                                                                                | 0.3736 | 0.0458 |
| 240935_at   |                 |                                                                                                                | 0.1072 | 0.0133 |
| 240938_at   |                 | CDNA FLJ25790 fis; clone TST06909                                                                              | 0.1109 | 0.0414 |
| 240987_at   |                 |                                                                                                                | 0.1138 | 0.0377 |
| 241085_at   |                 | CDNA FLJ42607 fis; clone BRACE3012806; weakly similar to Homo sapiens adrenergic; alpha-1A-; receptor (ADRA1A) | 0.2227 | 0.0147 |
| 241087_at   |                 |                                                                                                                | 0.1875 | 0.0346 |
| 241183_at   |                 |                                                                                                                | 0.1148 | 0.0262 |
| 241281_at   |                 |                                                                                                                | 0.1437 | 0.0384 |
| 241297_at   |                 |                                                                                                                | 0.2028 | 0.0007 |
| 241353_s_at |                 | Transcribed locus; strongly similar to XP_531081.2 hypothetical protein [Pan troglodytes]                      | 0.7483 | 0.0058 |
| 241456_at   |                 | CDNA FLJ30785 fis; clone FEBRA2000901                                                                          | 0.5972 | 0.0228 |
| 241570_at   |                 |                                                                                                                | 0.1773 | 0.0327 |
| 241582_at   |                 | Transcribed locus                                                                                              | 0.1092 | 0.0437 |
| 241602_at   | ZNF582          | zinc finger protein 582                                                                                        | 0.4539 | 0.0431 |
| 241635_at   |                 | Transcribed locus                                                                                              | 0.2285 | 0.0144 |
| 241657_at   |                 | Transcribed locus                                                                                              | 0.1079 | 0.0421 |
| 241714_at   |                 |                                                                                                                | 0.1328 | 0.0426 |
| 241759_at   | MGC5566         | Hypothetical protein MGC5566                                                                                   | 0.1403 | 0.0181 |
| 241803_s_at |                 |                                                                                                                | 1.1426 | 0.0081 |
| 241810_at   |                 |                                                                                                                | 0.1457 | 0.0311 |
| 241840_at   |                 | Transcribed locus                                                                                              | 0.5069 | 0.006  |
| 241858_at   |                 | CDNA FLJ44346 fis; clone TRACH3005808; highly similar to Homo sapiens p150                                     | 0.3985 | 0.0221 |
| 241864_x_at |                 | Transcribed locus                                                                                              | 0.5644 | 0.0107 |



|             |           |                                                                                                                        |        |        |
|-------------|-----------|------------------------------------------------------------------------------------------------------------------------|--------|--------|
| 241871_at   | CAMK4     | calcium/calmodulin-dependent protein kinase IV                                                                         | 0.2033 | 0.0135 |
| 241899_at   | LOC553103 | hypothetical LOC553103                                                                                                 | 0.2658 | 0.0044 |
| 241959_at   | ANAPC10   | anaphase promoting complex subunit 10, similar to Anaphase-promoting complex subunit 10 (APC10) (Cyclosome subunit 10) | 0.8662 | 0.0075 |
| 241981_at   | FAM20A    | family with sequence similarity 20; member A                                                                           | 0.4467 | 0.0124 |
| 242153_at   |           | Transcribed locus                                                                                                      | 0.3843 | 0.0016 |
| 242158_at   | PAPOLB    | poly(A) polymerase beta (testis specific)                                                                              | 0.1427 | 0.0022 |
| 242281_at   |           |                                                                                                                        | 0.7438 | 0.0072 |
| 242288_s_at | EMILIN2   | elastin microfibril interfacier 2                                                                                      | 0.1694 | 0.046  |
| 242295_at   | FLJ32955  | hypothetical protein FLJ32955                                                                                          | 0.1336 | 0.0173 |
| 242323_at   |           | Full-length cDNA clone CS0DF027YF17 of Fetal brain of Homo sapiens (human)                                             | 0.9153 | 0.0315 |
| 242367_at   |           |                                                                                                                        | 0.1063 | 0.0451 |
| 242375_x_at |           |                                                                                                                        | 0.385  | 0.0112 |
| 242382_at   |           | Homo sapiens; clone IMAGE:5539086; mRNA                                                                                | 0.1336 | 0.0239 |
| 242399_at   |           |                                                                                                                        | 0.1597 | 0.0268 |
| 242401_x_at |           | Transcribed locus                                                                                                      | 0.1184 | 0.0089 |
| 242412_at   |           | Transcribed locus                                                                                                      | 0.185  | 0.0013 |
| 242434_at   |           | CDNA FLJ31093 fis; clone IMR321000161                                                                                  | 0.2589 | 0.0275 |
| 242596_at   |           | Transcribed locus; weakly similar to XP_001129408.1 hypothetical protein [Homo sapiens]                                | 0.1879 | 0.0156 |
| 242648_at   | KLHL8     | kelch-like 8 (Drosophila)                                                                                              | 0.6888 | 0.0203 |
| 242682_at   |           |                                                                                                                        | 0.106  | 0.0217 |
| 242683_at   | FLJ38028  | hypothetical gene supported by AK095347                                                                                | 0.1355 | 0.041  |
| 242698_at   | AKAP14    | A kinase (PRKA) anchor protein 14                                                                                      | 0.1343 | 0.0389 |
| 242702_at   | MMAA      | methylmalonic aciduria (cobalamin deficiency) cblA type                                                                | 0.323  | 0.0145 |
| 242714_at   |           |                                                                                                                        | 0.3081 | 0.0315 |
| 242760_x_at | PIGB      | phosphatidylinositol glycan anchor biosynthesis; class B                                                               | 0.8671 | 0.0056 |
| 242882_at   | RNF207    | ring finger protein 207                                                                                                | 0.2434 | 0.0441 |
| 242925_at   | RNF148    | ring finger protein 148                                                                                                | 0.6404 | 0.0475 |
| 242945_at   | FAM20A    | family with sequence similarity 20; member A                                                                           | 0.4695 | 0.0168 |
| 242961_x_at | DDX58     | DEAD (Asp-Glu-Ala-Asp) box polypeptide 58                                                                              | 1.2199 | 0.0192 |
| 242963_at   | SGMS2     | sphingomyelin synthase 2                                                                                               | 0.496  | 0.0111 |
| 242998_at   | RDH12     | retinol dehydrogenase 12 (all-trans/9-cis/11-cis)                                                                      | 1.1937 | 0.0325 |
| 243017_at   |           | Transcribed locus                                                                                                      | 0.6905 | 0.0253 |
| 243018_at   |           | Transcribed locus; moderately similar to XP_945958.1 hypothetical protein XP_945958 [Homo sapiens]                     | 0.3147 | 0.0356 |
| 243024_at   | ZNF394    | Zinc finger protein 394                                                                                                | 0.3196 | 0.0194 |
| 243049_at   |           |                                                                                                                        | 0.1672 | 0.0446 |
| 243099_at   | NFAM1     | NFAT activating protein with ITAM motif 1                                                                              | 0.1976 | 0.0344 |
| 243107_at   |           |                                                                                                                        | 0.1513 | 0.0457 |
| 243130_at   |           | Transcribed locus                                                                                                      | 0.3471 | 0.0244 |
| 243141_at   | SGMS2     | sphingomyelin synthase 2                                                                                               | 0.4401 | 0.0008 |
| 243278_at   |           | Transcribed locus                                                                                                      | 1.2043 | 0.0301 |
| 243309_at   | FLJ27352  | hypothetical LOC145788                                                                                                 | 0.9617 | 0.0155 |
| 243357_at   | NEGR1     | neuronal growth regulator 1                                                                                            | 0.1754 | 0.0073 |
| 243366_s_at |           | Transcribed locus                                                                                                      | 1.4313 | 0.0256 |
| 243444_at   |           |                                                                                                                        | 0.826  | 0.0002 |
| 243477_at   | ATG10     | ATG10 autophagy related 10 homolog (S. cerevisiae)                                                                     | 0.3207 | 0.003  |
| 243521_at   |           | Transcribed locus                                                                                                      | 1.0506 | 0.0009 |
| 243680_at   |           | Transcribed locus; strongly similar to XP_001152474.1 hypothetical protein [Pan troglodytes]                           | 0.3573 | 0.0066 |
| 243698_at   |           | Transcribed locus                                                                                                      | 0.2047 | 0.027  |
| 243702_at   |           | Full length insert cDNA clone YZ94H06                                                                                  | 0.4277 | 0.0377 |
| 243742_at   |           | Transcribed locus; strongly similar to XP_001135681.1 hypothetical protein [Pan troglodytes]                           | 0.3246 | 0.0014 |
| 243762_at   |           | CDNA clone IMAGE:5298708, Prostate-specific P775P mRNA sequence                                                        | 0.209  | 0.0442 |
| 243824_at   |           | Homo sapiens; clone IMAGE:5213378; mRNA                                                                                | 0.4057 | 0.0396 |
| 243894_at   | SLC41A2   | solute carrier family 41; member 2                                                                                     | 1.4136 | 0.0127 |
| 243934_at   |           | Transcribed locus                                                                                                      | 0.2049 | 0.0307 |

|            |           |                                                                                                |        |        |
|------------|-----------|------------------------------------------------------------------------------------------------|--------|--------|
| 243994_at  | LOC730168 | hypothetical protein LOC730168                                                                 | 0.1271 | 0.0181 |
| 243999_at  | SLFN5     | schlafen family member 5                                                                       | 0.5313 | 0.0049 |
| 244123_at  |           | Transcribed locus                                                                              | 0.16   | 0.0318 |
| 244170_at  |           | CDNA FLJ37366 fis; clone BRAMY2024416                                                          | 1.0796 | 0.0404 |
| 244200_at  |           | Transcribed locus                                                                              | 0.1322 | 0.0351 |
| 244246_at  | MIPOL1    | mirror-image polydactyly 1                                                                     | 0.8791 | 0.0327 |
| 244280_at  |           | Homo sapiens; clone IMAGE:5583725; mRNA                                                        | 0.1732 | 0.0129 |
| 244293_at  |           | Transcribed locus                                                                              | 0.4103 | 0.0429 |
| 244352_at  | CD84      | CD84 molecule                                                                                  | 0.8838 | 0.019  |
| 244413_at  | CLECL1    | C-type lectin-like 1                                                                           | 0.5493 | 0.0013 |
| 244434_at  |           |                                                                                                | 0.3369 | 0.0135 |
| 244445_at  |           | Transcribed locus                                                                              | 0.1253 | 0.0328 |
| 244485_at  |           | Transcribed locus                                                                              | 0.7294 | 0.0466 |
| 244514_at  |           | Transcribed locus                                                                              | 0.2218 | 0.0275 |
| 244561_at  |           | Homo sapiens; Similar to LOC169932; clone IMAGE:4499203; mRNA                                  | 0.5901 | 0.0025 |
| 244572_at  | KY        | kyphoscoliosis peptidase                                                                       | 0.3514 | 0.0127 |
| 244641_at  | C7orf30   | chromosome 7 open reading frame 30                                                             | 0.5504 | 0.0039 |
| 244653_at  | SETD7     | SET domain containing (lysine methyltransferase) 7                                             | 0.2317 | 0.0229 |
| 244680_at  | GLRB      | glycine receptor; beta                                                                         | 1.1752 | 0.0006 |
| 244684_at  |           | Transcribed locus                                                                              | 0.2019 | 0.0162 |
| 244688_at  |           | Transcribed locus                                                                              | 0.1728 | 0.0091 |
| 244705_at  |           | CDNA FLJ33356 fis; clone BRACE2005160                                                          | 0.6928 | 0.0248 |
| 244710_at  | LRGUK     | leucine-rich repeats and guanylate kinase domain containing                                    | 0.232  | 0.0003 |
| 244748_at  |           | Transcribed locus                                                                              | 0.1227 | 0.0266 |
| 244749_at  |           | Homo sapiens; clone IMAGE:5218412; mRNA                                                        | 0.4119 | 0.0028 |
| 244752_at  | ZNF438    | zinc finger protein 438                                                                        | 0.1897 | 0.0185 |
| 244802_at  | GLUD1     | glutamate dehydrogenase 1                                                                      | 1.0444 | 0.0164 |
| 244805_at  |           | Transcribed locus                                                                              | 0.1131 | 0.0434 |
| 31846_at   | RHOD      | ras homolog gene family; member D                                                              | 0.4025 | 0.0111 |
| 32042_at   | ENOX2     | ecto-NOX disulfide-thiol exchanger 2                                                           | 0.7949 | 0.0261 |
| 33736_at   | STOML1    | stomatin (EPB72)-like 1                                                                        | 1.4495 | 0.0119 |
| 35974_at   | LRMP      | lymphoid-restricted membrane protein                                                           | 0.4192 | 0.0226 |
| 36004_at   | IKBKG     | inhibitor of kappa light polypeptide gene enhancer in B-cells; kinase gamma                    | 0.6487 | 0.0281 |
| 36553_at   | ASMTL     | acetylserotonin O-methyltransferase-like                                                       | 0.7718 | 0.0326 |
| 36554_at   | ASMTL     | acetylserotonin O-methyltransferase-like                                                       | 1.0802 | 0.0308 |
| 36920_at   | MTM1      | myotubularin 1                                                                                 | 1.4518 | 0.0001 |
| 36994_at   | ATP6V0C   | ATPase; H+ transporting; lysosomal 16kDa; V0 subunit c                                         | 0.4543 | 0.0232 |
| 37145_at   | GNLY      | granulysin                                                                                     | 1.1253 | 0.0099 |
| 37170_at   | BMP2K     | BMP2 inducible kinase                                                                          | 0.5482 | 0.019  |
| 37278_at   | TAZ       | tafazzin (cardiomyopathy; dilated 3A (X-linked); endocardial fibroelastosis 2; Barth syndrome) | 0.6441 | 0.0017 |
| 37943_at   | ZFYVE26   | zinc finger; FYVE domain containing 26                                                         | 0.6185 | 0.0062 |
| 37953_s_at | ACCN2     | amiloride-sensitive cation channel 2; neuronal                                                 | 0.2122 | 0.0265 |
| 38043_at   | FAM3A     | family with sequence similarity 3; member A                                                    | 1.1646 | 0.0114 |
| 38241_at   | BTN3A3    | butyrophilin; subfamily 3; member A3                                                           | 0.8794 | 0.0446 |
| 38766_at   | SRCAP     | Snf2-related CBP activator protein                                                             | 0.3805 | 0.0024 |
| 40148_at   | APBB2     | amyloid beta (A4) precursor protein-binding; family B; member 2 (Fe65-like)                    | 0.511  | 0.0009 |
| 40420_at   | STK10     | serine/threonine kinase 10                                                                     | 1.1377 | 0.0174 |
| 40465_at   | DDX23     | DEAD (Asp-Glu-Ala-Asp) box polypeptide 23                                                      | 0.6075 | 0.0138 |
| 43511_s_at |           | MRNA; cDNA DKFZp762M127 (from clone DKFZp762M127)                                              | 0.7938 | 0.0343 |
| 44120_at   | ADCK2     | aarF domain containing kinase 2                                                                | 0.9869 | 0.0008 |
| 44673_at   | SIGLEC1   | sialic acid binding Ig-like lectin 1; sialoadhesin                                             | 1.0205 | 0.0249 |
| 46167_at   | C1orf175  | chromosome 1 open reading frame 175, tetratricopeptide repeat domain 4                         | 0.6982 | 0.0374 |
| 47083_at   | C7orf26   | chromosome 7 open reading frame 26                                                             | 0.6197 | 0.0056 |
| 48106_at   | FLJ20489  | hypothetical protein FLJ20489                                                                  | 1.2166 | 0.0205 |

|                         |           |                                                                                  |         |        |
|-------------------------|-----------|----------------------------------------------------------------------------------|---------|--------|
| 49111_at                |           | MRNA; cDNA DKFZp762M127 (from clone DKFZp762M127)                                | 0.5754  | 0.0164 |
| 49306_at                | RASSF4    | Ras association (RalGDS/AF-6) domain family 4                                    | 0.4404  | 0.0198 |
| 49485_at                | PRDM4     | PR domain containing 4                                                           | 0.8307  | 0.0331 |
| 50221_at                | TFEB      | transcription factor EB                                                          | 1.1842  | 0.0035 |
| 50314_i_at              | C20orf27  | chromosome 20 open reading frame 27                                              | 0.8574  | 0.0112 |
| 51158_at                | LOC400451 | hypothetical gene supported by AK075564; BC060873                                | 0.4911  | 0.0299 |
| 51200_at                | C19orf60  | chromosome 19 open reading frame 60                                              | 0.4592  | 0.0458 |
| 59644_at                | BMP2K     | BMP2 inducible kinase                                                            | 1.1432  | 0.0152 |
| 60471_at                | RIN3      | Ras and Rab interactor 3                                                         | 1.7283  | 0.0034 |
| 63009_at                | SHQ1      | SHQ1 homolog (S. cerevisiae)                                                     | 0.7046  | 0.0128 |
| 64064_at                | GIMAP5    | GTPase; IMAP family member 5                                                     | 0.7401  | 0.0119 |
| 64432_at                | C12orf47  | chromosome 12 open reading frame 47                                              | 0.6198  | 0.0365 |
| 71933_at                | WNT6      | wingless-type MMTV integration site family; member 6                             | 0.1666  | 0.0032 |
| 90610_at                | LRCH4     | leucine-rich repeats and calponin homology (CH) domain containing 4              | 0.8622  | 0.0077 |
| AFFX-HSAC07/X00351_3_at | ACTB      | actin; beta                                                                      | 0.1085  | 0.0285 |
| 1552256_a_at            | SCARB1    | scavenger receptor class B; member 1                                             | -0.8186 | 0.0227 |
| 1552347_at              | CRYZL1    | crystallin; zeta (quinone reductase)-like 1                                      | -0.8593 | 0.0138 |
| 1552461_at              | FAM46D    | family with sequence similarity 46; member D                                     | -0.1447 | 0.0057 |
| 1552588_a_at            |           |                                                                                  | -0.1364 | 0.0152 |
| 1552592_at              | MMP21     | matrix metalloproteinase 21                                                      | -0.1289 | 0.037  |
| 1552793_at              | C8orf31   | chromosome 8 open reading frame 31                                               | -1.5972 | 0.0185 |
| 1552829_at              |           |                                                                                  | -0.2647 | 0.0357 |
| 1552910_at              | SIGLEC11  | sialic acid binding Ig-like lectin 11                                            | -2.7414 | 0.0069 |
| 1552911_at              | SIGLEC11  | sialic acid binding Ig-like lectin 11                                            | -1.9231 | 0.0132 |
| 1553022_at              | ZIM3      | zinc finger; imprinted 3                                                         | -0.114  | 0.0305 |
| 1553131_a_at            | GATA4     | GATA binding protein 4                                                           | -0.8951 | 0.0469 |
| 1553227_s_at            | BRWD1     | bromodomain and WD repeat domain containing 1                                    | -0.9081 | 0.0089 |
| 1553346_a_at            | TNRC6A    | trinucleotide repeat containing 6A                                               | -0.2426 | 0.0201 |
| 1553349_at              | ARID2     | AT rich interactive domain 2 (ARID; RFX-like)                                    | -0.9683 | 0.041  |
| 1553356_at              |           | PRO0902                                                                          | -0.1314 | 0.0064 |
| 1553387_at              | ATM       | ataxia telangiectasia mutated                                                    | -0.2642 | 0.0066 |
| 1553458_at              | C10orf72  | chromosome 10 open reading frame 72                                              | -0.4755 | 0.0043 |
| 1553504_at              | MRGPRX4   | MAS-related GPR; member X4                                                       | -0.1406 | 0.0249 |
| 1553602_at              | MUCL1     | mucin-like 1                                                                     | -2.6255 | 0.0367 |
| 1553603_s_at            | ARL6IP2   | ADP-ribosylation factor-like 6 interacting protein 2                             | -1.4318 | 0.0181 |
| 1553686_at              | C18orf25  | chromosome 18 open reading frame 25                                              | -0.1526 | 0.0153 |
| 1553749_at              | FAM76B    | family with sequence similarity 76; member B                                     | -0.2514 | 0.0497 |
| 1553909_x_at            | C10orf6   | chromosome 10 open reading frame 6                                               | -0.7    | 0.0447 |
| 1553920_at              | C9orf84   | chromosome 9 open reading frame 84                                               | -1.3331 | 0.007  |
| 1553991_s_at            | FLJ20674  | hypothetical protein FLJ20674                                                    | -0.3461 | 0.018  |
| 1554106_at              | ALS2CR16  | amyotrophic lateral sclerosis 2 (juvenile) chromosome region; candidate 16       | -1.3909 | 0.017  |
| 1554178_a_at            | FAM126B   | family with sequence similarity 126; member B                                    | -0.9539 | 0.006  |
| 1554319_at              | RPS6KA5   | ribosomal protein S6 kinase; 90kDa; polypeptide 5                                | -0.1364 | 0.0055 |
| 1554512_a_at            | CCDC123   | coiled-coil domain containing 123                                                | -0.3646 | 0.0396 |
| 1554579_a_at            | MYO18B    | myosin XVIIIIB                                                                   | -0.1909 | 0.0418 |
| 1554638_at              | ZFYVE16   | zinc finger; FYVE domain containing 16                                           | -1.0635 | 0.0267 |
| 1554733_at              | MGC24125  | hypothetical protein MGC24125                                                    | -2.0282 | 0.0067 |
| 1554771_at              |           | CDNA clone IMAGE:4300887                                                         | -0.4707 | 0.0484 |
| 1554889_at              | TIA1      | TIA1 cytotoxic granule-associated RNA binding protein                            | -0.4472 | 0.0069 |
| 1554907_a_at            | HYDIN     | hydrocephalus inducing homolog (mouse), hydrocephalus inducing homolog 2 (mouse) | -0.1395 | 0.034  |
| 1554994_at              | RAG1      | recombination activating gene 1                                                  | -0.119  | 0.0167 |
| 1555025_at              | TMEM26    | transmembrane protein 26                                                         | -0.1569 | 0.0307 |
| 1555088_x_at            | STAT5B    | signal transducer and activator of transcription 5B                              | -0.2458 | 0.0342 |
| 1555117_at              |           |                                                                                  | -0.1522 | 0.0284 |
| 1555125_at              | C21orf66  | chromosome 21 open reading frame 66                                              | -0.7246 | 0.0387 |
| 1555131_a_at            | PER3      | period homolog 3 (Drosophila)                                                    | -0.212  | 0.0491 |

|              |           |                                                                              |         |        |
|--------------|-----------|------------------------------------------------------------------------------|---------|--------|
| 1555146_at   | ATF2      | activating transcription factor 2                                            | -0.4386 | 0.0087 |
| 1555245_s_at | RP1L1     | retinitis pigmentosa 1-like 1                                                | -0.1793 | 0      |
| 1555322_at   |           | PP2672                                                                       | -0.1223 | 0.0308 |
| 1555336_a_at | ITGA9     | integrin; alpha 9                                                            | -0.5501 | 0.0098 |
| 1555514_a_at | PIAS2     | protein inhibitor of activated STAT; 2                                       | -0.693  | 0.0364 |
| 1555568_at   | MGC22265  | hypothetical protein MGC22265                                                | -0.1717 | 0.0309 |
| 1555624_a_at | SSH1      | slingshot homolog 1 (Drosophila)                                             | -0.2391 | 0.0181 |
| 1555685_at   | H6PD      | Hexose-6-phosphate dehydrogenase (glucose 1-dehydrogenase)                   | -0.1867 | 0.0129 |
| 1555723_at   |           | OK/SW-cl.79                                                                  | -0.2868 | 0.0012 |
| 1555926_a_at |           | CDNA FLJ30680 fis; clone FCBBF2000123                                        | -0.3218 | 0.0197 |
| 1555950_a_at | CD55      | CD55 molecule; decay accelerating factor for complement (Cromer blood group) | -1.7924 | 0.0097 |
| 1555997_s_at | IGFBP5    | insulin-like growth factor binding protein 5                                 | -0.4169 | 0.0092 |
| 1556035_s_at | ZNF207    | zinc finger protein 207                                                      | -1.4436 | 0.0103 |
| 1556049_at   | RTN4      | reticulon 4                                                                  | -1.0748 | 0.0481 |
| 1556054_at   |           | Full length insert cDNA clone ZD45C02                                        | -1.1131 | 0.0106 |
| 1556060_a_at | KIAA1702  | KIAA1702 protein                                                             | -1.1417 | 0.0043 |
| 1556105_at   |           | CDNA FLJ41020 fis; clone UTERU2019163                                        | -1.2023 | 0.0117 |
| 1556125_at   | GPATCH2   | G patch domain containing 2                                                  | -0.2575 | 0.041  |
| 1556277_a_at | PAPD4     | PAP associated domain containing 4                                           | -0.9744 | 0.0423 |
| 1556338_at   |           | CDNA FLJ39845 fis; clone SPLEN2014452                                        | -0.9303 | 0.0317 |
| 1556352_at   |           | CDNA FLJ30440 fis; clone BRACE2009185                                        | -0.8806 | 0.0098 |
| 1556364_at   | LOC730057 | Hypothetical protein LOC730057                                               | -1.8661 | 0.0043 |
| 1556432_at   |           | CDNA FLJ35329 fis; clone PROST2013873                                        | -0.3788 | 0.0079 |
| 1556493_a_at | JMJD2C    | jumonji domain containing 2C                                                 | -0.9029 | 0.0229 |
| 1556543_at   |           | Full length insert cDNA clone YW18F01                                        | -0.9294 | 0.0244 |
| 1556560_a_at | TSSK3     | CDNA FLJ36415 fis; clone THYMU2010917, Testis-specific serine kinase 3       | -0.2265 | 0.0226 |
| 1556568_a_at |           | Clone C4E 5.3 (CAC)n/(GTG)n repeat-containing mRNA                           | -2.5086 | 0.0024 |
| 1556582_at   |           | CDNA FLJ25946 fis; clone JTH14258                                            | -0.7024 | 0.0439 |
| 1556589_at   |           | CDNA FLJ25645 fis; clone SYN00113                                            | -2.1607 | 0.0012 |
| 1556590_s_at |           | CDNA FLJ25645 fis; clone SYN00113                                            | -2.5236 | 0.0012 |
| 1556622_s_at |           | Full length insert cDNA clone YP97D11                                        | -0.1189 | 0.0153 |
| 1556650_at   |           | CDNA FLJ13011 fis; clone NT2RP3000561                                        | -0.5508 | 0.0161 |
| 1556659_at   |           | CDNA FLJ33647 fis; clone BRAMY2024374                                        | -0.527  | 0.0196 |
| 1556682_s_at |           | Full length insert cDNA clone ZD73H04                                        | -0.4634 | 0.0152 |
| 1556683_x_at |           | Full length insert cDNA clone ZD73H04                                        | -0.3934 | 0.0064 |
| 1556689_a_at | WNT4      | wingless-type MMTV integration site family; member 4                         | -0.3547 | 0.0242 |
| 1556715_at   | PRPSAP1   | Phosphoribosyl pyrophosphate synthetase-associated protein 1                 | -0.6383 | 0.0363 |
| 1556775_at   |           | CDNA clone IMAGE:5271366                                                     | -0.2587 | 0.0142 |
| 1556787_s_at |           |                                                                              | -0.1996 | 0.0108 |
| 1556894_at   | NT5DC2    | 5'-nucleotidase domain containing 2                                          | -0.2489 | 0.0339 |
| 1556925_at   | SMC3      | Structural maintenance of chromosomes 3                                      | -0.3274 | 0.0357 |
| 1556933_at   |           | Full length insert cDNA clone YP43E01                                        | -0.1729 | 0.0147 |
| 1556964_s_at |           | CDNA FLJ34002 fis; clone FCBBF1000206                                        | -0.1443 | 0.0431 |
| 1556984_at   |           | Full length insert cDNA clone YU27A09                                        | -0.2448 | 0.0337 |
| 1557050_at   | HOXA2     | Homeobox A2                                                                  | -0.4252 | 0.0337 |
| 1557094_at   | LOC653110 | hypothetical LOC653110, hypothetical protein LOC728449                       | -0.1166 | 0.0271 |
| 1557192_at   | C1orf136  | chromosome 1 open reading frame 136                                          | -0.5783 | 0.02   |
| 1557223_at   | SDHALP2   | succinate dehydrogenase complex; subunit A; flavoprotein pseudogene 2        | -0.4239 | 0.0493 |
| 1557224_at   |           | CDNA FLJ30981 fis; clone HHDPC2000258                                        | -0.8544 | 0.0245 |
| 1557239_at   |           | Full length insert cDNA clone YW25E05                                        | -1.6287 | 0.0036 |
| 1557240_a_at |           | Full length insert cDNA clone YW25E05                                        | -1.7058 | 0.0059 |
| 1557246_at   | KIDINS220 | kinase D-interacting substrate of 220 kDa                                    | -1.6555 | 0.0031 |
| 1557252_at   |           | CDNA FLJ36213 fis; clone THYMU2000671                                        | -0.9479 | 0.0015 |
| 1557289_s_at | GTF2IRD2  | GTF2I repeat domain containing 2                                             | -0.2259 | 0.0456 |
| 1557315_a_at |           | CDNA FLJ39920 fis; clone SPLEN2020166                                        | -0.2762 | 0.0243 |
| 1557326_at   |           | CDNA clone IMAGE:5301138                                                     | -1.2094 | 0.0198 |

|              |           |                                                                          |         |        |
|--------------|-----------|--------------------------------------------------------------------------|---------|--------|
| 1557339_at   |           | Homo sapiens; clone IMAGE:5190399; mRNA                                  | -0.119  | 0.0493 |
| 1557352_at   | SQLE      | Squalene epoxidase                                                       | -2.171  | 0.009  |
| 1557360_at   | LRPPRC    | leucine-rich PPR-motif containing                                        | -1.1542 | 0.0475 |
| 1557403_s_at |           | CDNA FLJ36685 fis; clone UTERU2008018                                    | -0.384  | 0.0065 |
| 1557437_a_at |           | CDNA clone IMAGE:5288367                                                 | -0.536  | 0.0176 |
| 1557502_at   | PCCB      | Propionyl Coenzyme A carboxylase; beta polypeptide                       | -0.1023 | 0.0084 |
| 1557506_a_at |           | Full length insert cDNA YH97B03                                          | -0.1547 | 0.0257 |
| 1557543_at   |           | MRNA; cDNA DKFZp313P2412 (from clone DKFZp313P2412)                      | -0.7199 | 0.0338 |
| 1557637_at   |           | CDNA clone IMAGE:5267718                                                 | -0.3159 | 0.0027 |
| 1557683_at   |           | CDNA FLJ14065 fis; clone HEMBB1000917                                    | -0.1845 | 0.0247 |
| 1557685_at   | C4orf38   | chromosome 4 open reading frame 38                                       | -0.5531 | 0.0165 |
| 1557689_at   |           | CDNA FLJ11951 fis; clone HEMBB1000827                                    | -0.9839 | 0.0114 |
| 1557690_x_at |           | CDNA FLJ11951 fis; clone HEMBB1000827                                    | -0.9107 | 0.0136 |
| 1557699_x_at |           | Homo sapiens; clone IMAGE:4043992; mRNA                                  | -0.4205 | 0.0046 |
| 1557706_at   | ZHX2      | zinc fingers and homeoboxes 2                                            | -0.4656 | 0.0118 |
| 1557707_at   |           | UV-B repressed sequence; HUR 8                                           | -0.3803 | 0.046  |
| 1557719_at   | PIP5K3    | phosphatidylinositol-3-phosphate/phosphatidylinositol 5-kinase; type III | -0.2824 | 0.0405 |
| 1557737_s_at | NKTR      | natural killer-tumor recognition sequence                                | -0.5972 | 0.0375 |
| 1557751_at   |           | CDNA FLJ32996 fis; clone THYMU1000142                                    | -0.6556 | 0.011  |
| 1557805_at   |           | Full length insert cDNA clone YT85B06                                    | -0.6097 | 0.0297 |
| 1557818_x_at |           | HSPC103                                                                  | -0.1238 | 0.0175 |
| 1557830_at   |           | CDNA FLJ10112 fis; clone HEMBA1002750                                    | -0.9112 | 0.0307 |
| 1557832_at   |           | CDNA FLJ20833 fis; clone ADKA02957                                       | -0.1514 | 0.0103 |
| 1557837_a_at | ELMOD2    | ELMO/CED-12 domain containing 2                                          | -0.1204 | 0.0427 |
| 1557895_at   | FLJ35934  | FLJ35934 protein                                                         | -0.417  | 0.0494 |
| 1557945_at   | TCTE3     | T-complex-associated-testis-expressed 3                                  | -0.985  | 0.0445 |
| 1558109_x_at | LOC283788 | hypothetical protein LOC283788                                           | -0.2446 | 0.0361 |
| 1558142_at   | TNRC6B    | trinucleotide repeat containing 6B                                       | -0.9952 | 0.0337 |
| 1558163_at   | PEX13     | Peroxisome biogenesis factor 13                                          | -0.3346 | 0.0061 |
| 1558164_s_at | PEX13     | Peroxisome biogenesis factor 13                                          | -1.1308 | 0.0059 |
| 1558247_s_at | LOC126147 | hypothetical protein BC018697                                            | -0.1332 | 0.0114 |
| 1558348_at   |           | CDNA FLJ33447 fis; clone BRAMY1000098                                    | -0.4211 | 0.0452 |
| 1558385_at   |           |                                                                          | -0.5265 | 0.0401 |
| 1558414_at   | C9orf4    | chromosome 9 open reading frame 4                                        | -0.4626 | 0.0251 |
| 1558430_at   |           | CDNA FLJ36648 fis; clone UTERU1000138                                    | -0.2284 | 0.0441 |
| 1558476_at   | C1orf165  | Chromosome 1 open reading frame 165                                      | -0.234  | 0.0229 |
| 1558512_at   |           | CDNA FLJ33400 fis; clone BRACE2009828                                    | -0.6685 | 0.0124 |
| 1558586_at   | ZNF33B    | zinc finger protein 33B                                                  | -0.3866 | 0.0247 |
| 1558600_a_at |           | CDNA FLJ37778 fis; clone BRHIP2026557                                    | -0.3442 | 0.0172 |
| 1558631_at   | PPARA     | peroxisome proliferator-activated receptor alpha                         | -0.4942 | 0.0499 |
| 1558695_at   |           | Full length insert cDNA clone YR58H12                                    | -2.1174 | 0.003  |
| 1558787_a_at |           | CDNA FLJ43445 fis; clone OCBBF2031366                                    | -0.14   | 0.008  |
| 1558815_at   | SORBS2    | sorbin and SH3 domain containing 2                                       | -1.87   | 0.0035 |
| 1558822_at   |           | Full length insert cDNA clone YP59C02                                    | -0.7476 | 0.0263 |
| 1558849_at   | LOC284276 | hypothetical protein LOC284276                                           | -0.2409 | 0.048  |
| 1558893_a_at | CCDC67    | coiled-coil domain containing 67                                         | -0.139  | 0.0466 |
| 1558900_at   |           | CDNA FLJ11322 fis; clone PLACE1010329                                    | -0.1423 | 0.0281 |
| 1558969_a_at | RPL32P3   | ribosomal protein L32 pseudogene 3                                       | -0.2921 | 0.0087 |
| 1559026_at   |           | CDNA clone IMAGE:5295490                                                 | -0.1964 | 0.0467 |
| 1559038_at   | 2-Sep     | septin 2                                                                 | -1.2085 | 0.0256 |
| 1559039_at   | DHX36     | DEAH (Asp-Glu-Ala-His) box polypeptide 36                                | -0.4519 | 0.0278 |
| 1559109_a_at |           | CDNA FLJ32270 fis; clone PROST1000527                                    | -0.1277 | 0.036  |
| 1559114_a_at | CXCR7     | Chemokine (C-X-C motif) receptor 7                                       | -0.1909 | 0.0195 |
| 1559117_at   |           | CDNA FLJ34664 fis; clone LIVER2000592                                    | -2.7933 | 0.0008 |
| 1559127_x_at | RRP12     | ribosomal RNA processing 12 homolog (S. cerevisiae)                      | -0.2349 | 0.0002 |
| 1559128_at   | HSDL2     | hydroxysteroid dehydrogenase like 2                                      | -1.0571 | 0.0004 |
| 1559156_at   |           | MRNA; cDNA DKFZp686B1142 (from clone DKFZp686B1142)                      | -1.0221 | 0.0223 |
| 1559206_at   | PSEN1     | presenilin 1 (Alzheimer disease 3)                                       | -0.12   | 0.0359 |

|              |           |                                                                                                                                                                                              |         |        |
|--------------|-----------|----------------------------------------------------------------------------------------------------------------------------------------------------------------------------------------------|---------|--------|
| 1559249_at   | ATXN1     | ataxin 1                                                                                                                                                                                     | -0.4557 | 0.0067 |
| 1559296_at   | LOC730057 | Hypothetical protein LOC730057                                                                                                                                                               | -0.6334 | 0.0065 |
| 1559331_x_at |           | CDNA FLJ25030 fis; clone CBL02631                                                                                                                                                            | -0.1575 | 0.0328 |
| 1559340_at   | C9orf148  | chromosome 9 open reading frame 148                                                                                                                                                          | -0.1041 | 0.0444 |
| 1559384_at   |           | Transcribed locus                                                                                                                                                                            | -0.1546 | 0.0152 |
| 1559391_s_at |           | Partial mRNA; ID EE2-8E                                                                                                                                                                      | -1.5242 | 0.0087 |
| 1559403_at   |           | Homo sapiens; clone IMAGE:5768746; mRNA                                                                                                                                                      | -0.1527 | 0.0407 |
| 1559421_at   |           |                                                                                                                                                                                              | -0.237  | 0.0182 |
| 1559491_at   |           | MRNA; cDNA DKFZp761L149 (from clone DKFZp761L149)                                                                                                                                            | -0.865  | 0.0047 |
| 1559529_at   | PTK2      | PTK2 protein tyrosine kinase 2                                                                                                                                                               | -1.5122 | 0.0008 |
| 1559544_s_at |           | CDNA clone IMAGE:5787947                                                                                                                                                                     | -0.1878 | 0.0174 |
| 1559550_s_at |           | MRNA; cDNA DKFZp434C0326 (from clone DKFZp434C0326)                                                                                                                                          | -0.6958 | 0.0467 |
| 1559600_at   |           | MRNA; cDNA DKFZp547G2314 (from clone DKFZp547G2314)                                                                                                                                          | -0.3399 | 0.0496 |
| 1559723_s_at |           | CDNA clone IMAGE:4830182                                                                                                                                                                     | -0.4859 | 0.0125 |
| 1559820_at   | ATG10     | ATG10 autophagy related 10 homolog (S. cerevisiae)                                                                                                                                           | -0.6135 | 0.0296 |
| 1559895_x_at |           |                                                                                                                                                                                              | -0.1602 | 0.0236 |
| 1559910_at   |           | MRNA full length insert cDNA clone EUROIMAGE 85905                                                                                                                                           | -1.5169 | 0.0019 |
| 1559945_at   | RUVBL2    | RuvB-like 2 (E. coli)                                                                                                                                                                        | -0.1264 | 0.0358 |
| 1559957_a_at | LOC642852 | hypothetical LOC642852                                                                                                                                                                       | -1.085  | 0.0371 |
| 1559987_at   |           | Homo sapiens; clone IMAGE:5585678; mRNA                                                                                                                                                      | -0.2636 | 0.0219 |
| 1560026_at   |           | CDNA clone IMAGE:5285703                                                                                                                                                                     | -0.5164 | 0.0267 |
| 1560042_at   | FAM82A    | family with sequence similarity 82; member A                                                                                                                                                 | -1.3326 | 0.0194 |
| 1560048_at   |           | CDNA FLJ30026 fis; clone 3NB692001123                                                                                                                                                        | -0.3778 | 0.0472 |
| 1560069_at   | LOC389072 | hypothetical protein LOC389072                                                                                                                                                               | -0.6753 | 0.035  |
| 1560112_at   | WDFY2     | WD repeat and FYVE domain containing 2                                                                                                                                                       | -0.9929 | 0.0172 |
| 1560133_at   | TNRC15    | trinucleotide repeat containing 15                                                                                                                                                           | -0.7718 | 0.0406 |
| 1560137_at   |           | CDNA FLJ32278 fis; clone PROST2000143                                                                                                                                                        | -0.4927 | 0.0435 |
| 1560172_at   | INTS10    | integrator complex subunit 10                                                                                                                                                                | -0.2544 | 0.0319 |
| 1560259_at   |           | Homo sapiens; clone IMAGE:4612205; mRNA                                                                                                                                                      | -2.0585 | 0.0004 |
| 1560274_at   | WTAP      | Wilms tumor 1 associated protein                                                                                                                                                             | -0.2647 | 0.0458 |
| 1560322_at   | RBMS3     | RNA binding motif; single stranded interacting protein                                                                                                                                       | -0.1641 | 0.0301 |
| 1560340_s_at | LOC441212 | retinitis pigmentosa 9 pseudogene                                                                                                                                                            | -0.2149 | 0.0061 |
| 1560342_at   |           | CDNA clone IMAGE:5275043                                                                                                                                                                     | -1.1927 | 0.0091 |
| 1560359_at   | PELO      | Pelota homolog (Drosophila)                                                                                                                                                                  | -1.7575 | 0.0163 |
| 1560372_at   |           | CDNA FLJ34680 fis; clone LIVER2003524                                                                                                                                                        | -0.148  | 0.03   |
| 1560373_a_at |           | CDNA FLJ34680 fis; clone LIVER2003524                                                                                                                                                        | -0.1527 | 0.0413 |
| 1560402_at   | GAS5      | growth arrest-specific 5                                                                                                                                                                     | -0.2842 | 0.0266 |
| 1560429_at   |           | Transcribed locus                                                                                                                                                                            | -0.1324 | 0.0142 |
| 1560474_at   |           | Homo sapiens; clone IMAGE:4294221; mRNA                                                                                                                                                      | -0.2378 | 0.0143 |
| 1560486_at   | STXBP3    | syntaxin binding protein 3                                                                                                                                                                   | -0.2072 | 0.018  |
| 1560554_a_at | C1orf145  | chromosome 1 open reading frame 145                                                                                                                                                          | -0.251  | 0.049  |
| 1560689_s_at | AKT2      | V-akt murine thymoma viral oncogene homolog 2                                                                                                                                                | -0.5725 | 0.0406 |
| 1560712_at   | TMPRSS11B | transmembrane protease; serine 11B                                                                                                                                                           | -0.1178 | 0.0431 |
| 1560717_at   |           | Homo sapiens; clone IMAGE:5164889; mRNA                                                                                                                                                      | -0.1515 | 0.0153 |
| 1560734_at   |           |                                                                                                                                                                                              | -0.1229 | 0.0346 |
| 1560813_at   |           | Homo sapiens; clone IMAGE:4043849; mRNA                                                                                                                                                      | -1.9069 | 0.0031 |
| 1560846_at   |           | CDNA clone IMAGE:4248996                                                                                                                                                                     | -0.1474 | 0.0341 |
| 1560859_at   | FGFR2     | fibroblast growth factor receptor 2 (bacteria-expressed kinase; keratinocyte growth factor receptor; craniofacial dysostosis 1; Crouzon syndrome; Pfeiffer syndrome; Jackson-Weiss syndrome) | -0.2329 | 0.0237 |
| 1560910_at   | PPIL6     | Peptidylprolyl isomerase (cyclophilin)-like 6                                                                                                                                                | -0.1457 | 0.0286 |
| 1560973_a_at |           | Full length insert cDNA clone ZD78G02                                                                                                                                                        | -0.2612 | 0.0155 |
| 1560986_a_at |           | Full length insert cDNA clone YW21C01                                                                                                                                                        | -0.63   | 0.0049 |
| 1560997_at   |           | Full length insert cDNA clone YW24A03                                                                                                                                                        | -0.1073 | 0.0387 |
| 1560998_x_at |           | Full length insert cDNA clone YW24A03                                                                                                                                                        | -0.1098 | 0.0158 |
| 1561002_at   |           | Clone IMAGE:111722 mRNA sequence                                                                                                                                                             | -0.2906 | 0.0022 |
| 1561121_at   |           | Full length insert cDNA clone ZD64C04                                                                                                                                                        | -0.2167 | 0.0208 |
| 1561139_at   |           | Full length insert cDNA clone ZD67D12                                                                                                                                                        | -0.6586 | 0.0462 |

|              |           |                                                                                                                                                                                                                                                                                                                                                                         |         |        |
|--------------|-----------|-------------------------------------------------------------------------------------------------------------------------------------------------------------------------------------------------------------------------------------------------------------------------------------------------------------------------------------------------------------------------|---------|--------|
| 1561153_at   |           | Full length insert cDNA YP99H09                                                                                                                                                                                                                                                                                                                                         | -0.4967 | 0.0019 |
| 1561167_at   |           | Full length insert cDNA clone YA75A09                                                                                                                                                                                                                                                                                                                                   | -1.4086 | 0.0075 |
| 1561240_at   |           | MRNA; cDNA DKFZp434C122 (from clone DKFZp434C122)                                                                                                                                                                                                                                                                                                                       | -0.1315 | 0.0066 |
| 1561316_at   | GABRB3    | Gamma-aminobutyric acid (GABA) A receptor; beta 3                                                                                                                                                                                                                                                                                                                       | -0.1484 | 0.0081 |
| 1561365_at   | NRP1      | Neuropilin 1                                                                                                                                                                                                                                                                                                                                                            | -0.1491 | 0.0355 |
| 1561527_at   |           | CDNA clone IMAGE:5271697                                                                                                                                                                                                                                                                                                                                                | -0.1293 | 0.042  |
| 1561584_at   |           | CDNA clone IMAGE:4824588                                                                                                                                                                                                                                                                                                                                                | -0.1676 | 0.0065 |
| 1561640_at   |           | Homo sapiens; clone IMAGE:4182761; mRNA                                                                                                                                                                                                                                                                                                                                 | -0.7675 | 0.0027 |
| 1561657_at   |           | Full length insert cDNA clone YZ55H04                                                                                                                                                                                                                                                                                                                                   | -1.3117 | 0.0271 |
| 1561682_at   |           | CDNA clone IMAGE:4836898                                                                                                                                                                                                                                                                                                                                                | -0.1506 | 0.0324 |
| 1561739_at   |           | MRNA; cDNA DKFZp667P184 (from clone DKFZp667P184)                                                                                                                                                                                                                                                                                                                       | -0.1131 | 0.0123 |
| 1561867_at   |           | Full length insert cDNA clone YR85B05                                                                                                                                                                                                                                                                                                                                   | -0.2745 | 0.0484 |
| 1561965_at   | SNRPB2    | Small nuclear ribonucleoprotein polypeptide B"                                                                                                                                                                                                                                                                                                                          | -0.3019 | 0.0209 |
| 1562062_at   | KIAA1245  | CLIP-190-like, KIAA1245, hypothetical protein LOC728895, neuroblastoma breakpoint family; member 1, neuroblastoma breakpoint family; member 10, neuroblastoma breakpoint family; member 11, neuroblastoma breakpoint family; member 20, neuroblastoma breakpoint family; member 3, neuroblastoma breakpoint family; member 8, neuroblastoma breakpoint family; member 9 | -0.8544 | 0.0212 |
| 1562063_x_at | KIAA1245  | CLIP-190-like, KIAA1245, hypothetical protein LOC728895, neuroblastoma breakpoint family; member 1, neuroblastoma breakpoint family; member 10, neuroblastoma breakpoint family; member 11, neuroblastoma breakpoint family; member 20, neuroblastoma breakpoint family; member 3, neuroblastoma breakpoint family; member 8, neuroblastoma breakpoint family; member 9 | -0.9134 | 0.0111 |
| 1562142_at   | SKIV2L2   | Superkiller viralicidic activity 2-like 2 ( <i>S. cerevisiae</i> )                                                                                                                                                                                                                                                                                                      | -0.2916 | 0.0038 |
| 1562161_at   |           | Full length insert cDNA clone YR48C03                                                                                                                                                                                                                                                                                                                                   | -0.1364 | 0.04   |
| 1562235_s_at |           | Transcribed locus                                                                                                                                                                                                                                                                                                                                                       | -1.9884 | 0.0008 |
| 1562236_at   | MYST4     | MYST histone acetyltransferase (monocytic leukemia) 4                                                                                                                                                                                                                                                                                                                   | -0.3242 | 0.0248 |
| 1562238_at   | USPL1     | ubiquitin specific peptidase like 1                                                                                                                                                                                                                                                                                                                                     | -0.3771 | 0.0179 |
| 1562280_at   |           | CDNA clone IMAGE:5267748                                                                                                                                                                                                                                                                                                                                                | -0.4577 | 0.0286 |
| 1562301_at   | C8orf34   | chromosome 8 open reading frame 34                                                                                                                                                                                                                                                                                                                                      | -0.1892 | 0.0319 |
| 1562313_at   | BCORL2    | BCL6 co-repressor-like 2                                                                                                                                                                                                                                                                                                                                                | -0.1055 | 0.0363 |
| 1562321_at   | PDK4      | pyruvate dehydrogenase kinase; isozyme 4                                                                                                                                                                                                                                                                                                                                | -2.9903 | 0.0077 |
| 1562342_at   |           | MRNA; cDNA DKFZp667G1416 (from clone DKFZp667G1416)                                                                                                                                                                                                                                                                                                                     | -0.3667 | 0.0334 |
| 1562428_at   | LOC654780 | SFPQ                                                                                                                                                                                                                                                                                                                                                                    | -0.191  | 0.0042 |
| 1562453_at   |           | MRNA; cDNA DKFZp686F1318 (from clone DKFZp686F1318)                                                                                                                                                                                                                                                                                                                     | -0.1249 | 0.0339 |
| 1562454_at   |           | MRNA; cDNA DKFZp313B1634 (from clone DKFZp313B1634)                                                                                                                                                                                                                                                                                                                     | -0.2186 | 0.0286 |
| 1562497_at   |           | CDNA FLJ38224 fis; clone FCBBF2003395                                                                                                                                                                                                                                                                                                                                   | -1.1969 | 0.0059 |
| 1562528_at   |           | Homo sapiens; clone IMAGE:5747561; mRNA                                                                                                                                                                                                                                                                                                                                 | -2.4915 | 0.0001 |
| 1562529_s_at |           | Homo sapiens; clone IMAGE:5747561; mRNA                                                                                                                                                                                                                                                                                                                                 | -2.6607 | 0.001  |
| 1562579_at   |           | CDNA clone IMAGE:5285194                                                                                                                                                                                                                                                                                                                                                | -0.1241 | 0.0292 |
| 1562648_at   | CCDC88A   | Coiled-coil domain containing 88A                                                                                                                                                                                                                                                                                                                                       | -0.6977 | 0.0021 |
| 1562650_at   | FRYL      | FRY-like                                                                                                                                                                                                                                                                                                                                                                | -0.2329 | 0.0162 |
| 1562684_at   |           | MRNA; cDNA DKFZp586H0718 (from clone DKFZp586H0718)                                                                                                                                                                                                                                                                                                                     | -0.7979 | 0.0233 |
| 1562752_at   |           | CDNA clone IMAGE:4801412                                                                                                                                                                                                                                                                                                                                                | -0.1289 | 0.0211 |
| 1562780_at   |           | CDNA clone IMAGE:5285536                                                                                                                                                                                                                                                                                                                                                | -0.1207 | 0.047  |
| 1562849_at   |           | CDNA FLJ37115 fis; clone BRACE2022158                                                                                                                                                                                                                                                                                                                                   | -0.1973 | 0.0126 |
| 1562863_at   |           | Homo sapiens; clone IMAGE:4289218; mRNA                                                                                                                                                                                                                                                                                                                                 | -0.3465 | 0.0184 |
| 1562947_x_at |           | Homo sapiens; clone IMAGE:3503939; mRNA                                                                                                                                                                                                                                                                                                                                 | -0.2905 | 0.0284 |
| 1562948_at   |           | Homo sapiens; clone IMAGE:5722724; mRNA                                                                                                                                                                                                                                                                                                                                 | -0.9313 | 0.0018 |
| 1562991_at   | ZNF292    | zinc finger protein 292                                                                                                                                                                                                                                                                                                                                                 | -0.1785 | 0.0018 |

|              |           |                                                                                                                       |         |        |
|--------------|-----------|-----------------------------------------------------------------------------------------------------------------------|---------|--------|
| 1563026_at   |           | CDNA clone IMAGE:4723122                                                                                              | -0.2465 | 0.0037 |
| 1563035_x_at | GPD1      | glycerol-3-phosphate dehydrogenase 1 (soluble)                                                                        | -0.1111 | 0.0247 |
| 1563055_at   |           | CDNA clone IMAGE:5312112                                                                                              | -0.1521 | 0.0125 |
| 1563166_at   |           | CDNA clone IMAGE:4272661                                                                                              | -0.2547 | 0.0033 |
| 1563332_at   |           | Homo sapiens; clone IMAGE:4697589; mRNA                                                                               | -0.1552 | 0.011  |
| 1563364_at   |           | Homo sapiens; clone IMAGE:4272847; mRNA                                                                               | -0.9397 | 0.0415 |
| 1563396_x_at |           | Homo sapiens; clone IMAGE:4281761; mRNA                                                                               | -0.2084 | 0.0047 |
| 1563398_at   |           | Homo sapiens; clone IMAGE:4248696; mRNA                                                                               | -0.1416 | 0.0148 |
| 1563471_at   | KIAA1632  | KIAA1632                                                                                                              | -0.2737 | 0.0385 |
| 1563482_at   |           | MRNA; cDNA DKFZp451M0319 (from clone DKFZp451M0319)                                                                   | -0.1711 | 0.0499 |
| 1563483_at   | FAM91A2   | family with sequence similarity 91; member A2                                                                         | -0.3404 | 0.0287 |
| 1563503_at   |           |                                                                                                                       | -0.1134 | 0.0098 |
| 1563505_at   | DUSP16    | Dual specificity phosphatase 16                                                                                       | -0.776  | 0.0102 |
| 1563776_at   |           | CDNA clone IMAGE:4837134                                                                                              | -0.1944 | 0.0496 |
| 1563906_at   | SOBP      | sine oculis binding protein homolog (Drosophila)                                                                      | -0.6474 | 0.0318 |
| 1563933_a_at | PLD5      | phospholipase D family; member 5                                                                                      | -2.7551 | 0.0241 |
| 1563985_at   |           |                                                                                                                       | -0.1411 | 0.0441 |
| 1564151_at   |           | CDNA FLJ25521 fis; clone CBR06845                                                                                     | -0.1843 | 0.0211 |
| 1564248_at   |           | UG0651E06                                                                                                             | -0.5428 | 0.0396 |
| 1564315_at   | C8orf49   | chromosome 8 open reading frame 49                                                                                    | -0.2117 | 0.0198 |
| 1564318_at   | POLR3A    | polymerase (RNA) III (DNA directed) polypeptide A; 155kDa                                                             | -0.2018 | 0.0193 |
| 1564334_at   |           | MRNA; cDNA DKFZp434C1427 (from clone DKFZp434C1427)                                                                   | -0.1617 | 0.0074 |
| 1564378_a_at |           | CDNA: FLJ21448 fis; clone COL04473                                                                                    | -0.7255 | 0.0479 |
| 1564387_at   | DOPEY1    | dopey family member 1                                                                                                 | -0.1219 | 0.0409 |
| 1564424_at   |           | CDNA clone IMAGE:4689616                                                                                              | -1.2782 | 0.0123 |
| 1564627_at   | DNAJC13   | DnaJ (Hsp40) homolog; subfamily C; member 13                                                                          | -0.1295 | 0.0341 |
| 1564665_at   |           | CDNA: FLJ22725 fis; clone HSI14917                                                                                    | -0.2817 | 0.0217 |
| 1564733_at   |           | Homo sapiens; clone IMAGE:3933170; mRNA                                                                               | -1.3377 | 0.0005 |
| 1564950_at   |           | CDNA clone IMAGE:4052341                                                                                              | -0.206  | 0.0007 |
| 1564972_x_at | SETDB2    | SET domain; bifurcated 2                                                                                              | -0.1636 | 0.0436 |
| 1565034_s_at | AFF3      | AF4/FMR2 family; member 3, myeloid/lymphoid or mixed-lineage leukemia (trithorax homolog; Drosophila)                 | -1.0589 | 0.0353 |
| 1565149_at   | DYNC2H1   | dynein; cytoplasmic 2; heavy chain 1                                                                                  | -0.8318 | 0.0062 |
| 1565265_at   |           | Trapped 3' terminal exon; clone C2D9                                                                                  | -0.1296 | 0.0455 |
| 1565620_at   | CTGLF1    | Centaurin; gamma-like family; member 1                                                                                | -0.6541 | 0.0225 |
| 1565635_at   |           | CDNA: FLJ20875 fis; clone ADKA02835                                                                                   | -0.1041 | 0.0457 |
| 1565703_at   | SMAD4     | SMAD family member 4                                                                                                  | -1.1123 | 0.0041 |
| 1565705_x_at |           | CDNA: FLJ21395 fis; clone COL03557                                                                                    | -0.2205 | 0.0485 |
| 1565804_at   |           | CDNA: FLJ21508 fis; clone COL05723                                                                                    | -0.3088 | 0.0238 |
| 1565806_at   | FLJ37035  | FLJ37035 protein                                                                                                      | -0.1638 | 0.0069 |
| 1565811_at   |           | CDNA clone IMAGE:5278245                                                                                              | -0.3185 | 0.0251 |
| 1565875_at   |           | Full length insert cDNA clone YP86C01                                                                                 | -0.1425 | 0.036  |
| 1565876_x_at |           | Full length insert cDNA clone YP86C01                                                                                 | -0.2115 | 0.0015 |
| 1565881_at   |           | CDNA FLJ12064 fis; clone HEMBB1002232                                                                                 | -0.3853 | 0.0201 |
| 1565898_at   | METT5D1   | Methyltransferase 5 domain containing 1                                                                               | -0.2534 | 0.0147 |
| 1565975_at   |           | CDNA FLJ23646 fis; clone COL03258                                                                                     | -0.6694 | 0.0222 |
| 1566079_at   | LOC647190 | similar to 40S ribosomal protein S16                                                                                  | -1.6455 | 0.0006 |
| 1566129_at   | LIMS1     | LIM and senescent cell antigen-like domains 1                                                                         | -0.5212 | 0.0149 |
| 1566251_at   | SH3GLP3   | CDNA clone IMAGE:4182839, SH3-domain GRB2-like pseudogene 3                                                           | -0.1464 | 0.0103 |
| 1566284_at   |           | PA4=candidate oncogene {3' region} [human; HEN-16; HEN-16T transformed endocervical cell lines; mRNA Partial; 315 nt] | -0.3013 | 0.0306 |
| 1566442_at   |           |                                                                                                                       | -1.0278 | 0.0228 |
| 1566468_at   |           | MRNA; cDNA DKFZp547E1510 (from clone DKFZp547E1510)                                                                   | -0.1407 | 0.0353 |
| 1566507_a_at | FBXO9     | F-box protein 9                                                                                                       | -0.4791 | 0.0453 |
| 1566511_at   | FBXO9     | F-box protein 9                                                                                                       | -0.1559 | 0.0066 |
| 1566515_at   | CWF19L2   | CWF19-like 2; cell cycle control (S. pombe)                                                                           | -0.1779 | 0.0247 |



|              |           |                                                                                                            |         |        |
|--------------|-----------|------------------------------------------------------------------------------------------------------------|---------|--------|
| 1566543_at   |           | CDNA FLJ40975 fis; clone UTERU2013502                                                                      | -0.1604 | 0.0053 |
| 1566778_at   |           | CDNA clone IMAGE:5294798                                                                                   | -0.1218 | 0.0106 |
| 1566787_at   |           | CDNA clone IMAGE:4796529                                                                                   | -0.1382 | 0.0171 |
| 1566851_at   | TRIM42    | tripartite motif-containing 42                                                                             | -0.1544 | 0.0018 |
| 1566880_at   |           | MRNA; cDNA DKFZp667L198 (from clone DKFZp667L198)                                                          | -0.721  | 0.0281 |
| 1566887_x_at |           | Multiple myeloma susceptibility mRNA sequence                                                              | -0.4249 | 0.0189 |
| 1566889_at   | THADA     | Thyroid adenoma associated                                                                                 | -0.1536 | 0.0304 |
| 1566924_at   |           | CDNA: FLJ20971 fis; clone ADSU01565                                                                        | -0.1199 | 0.0214 |
| 1567031_at   | ZNF160    | zinc finger protein 160                                                                                    | -0.1558 | 0.0013 |
| 1567222_x_at | ELOVL5    | ELOVL family member 5; elongation of long chain fatty acids (FEN1/Elo2; SUR4/Elo3-like; yeast)             | -0.1508 | 0.0138 |
| 1567443_x_at | PSEN1     | presenilin 1 (Alzheimer disease 3)                                                                         | -0.1433 | 0.0176 |
| 1567687_at   | CECR9     | cat eye syndrome chromosome 9 region; candidate 9                                                          | -0.1069 | 0.0147 |
| 1567856_x_at |           | Kox26 mRNA for zinc finger protein; partial                                                                | -0.1158 | 0.0163 |
| 1568696_at   | ARMETL1   | arginine-rich; mutated in early stage tumors-like 1                                                        | -0.1823 | 0.0413 |
| 1568801_at   | C15orf44  | chromosome 15 open reading frame 44                                                                        | -0.2644 | 0.0175 |
| 1568834_s_at | CCDC90B   | coiled-coil domain containing 90B                                                                          | -1.4047 | 0.0078 |
| 1568857_a_at | NBR2      | Neighbor of BRCA1 gene 2                                                                                   | -0.4561 | 0.0366 |
| 1568898_at   |           | Homo sapiens; clone IMAGE:3921535; mRNA                                                                    | -0.1299 | 0      |
| 1569021_at   | PIK3C2A   | phosphoinositide-3-kinase; class 2; alpha polypeptide                                                      | -0.2231 | 0.0316 |
| 1569041_at   |           | CDNA clone IMAGE:5262215                                                                                   | -0.7987 | 0.0227 |
| 1569076_a_at | FLJ16287  | FLJ16287 protein                                                                                           | -1.2735 | 0.0317 |
| 1569077_x_at | FLJ16287  | FLJ16287 protein                                                                                           | -1.6015 | 0.0095 |
| 1569142_at   | TRIM13    | tripartite motif-containing 13                                                                             | -0.4838 | 0.0331 |
| 1569190_at   | SCLT1     | sodium channel and clathrin linker 1                                                                       | -0.2976 | 0.0282 |
| 1569193_at   |           | CDNA clone IMAGE:4821290                                                                                   | -0.1092 | 0.0392 |
| 1569201_a_at |           | Homo sapiens; clone IMAGE:3454421; mRNA                                                                    | -0.7603 | 0.0284 |
| 1569243_at   |           | CDNA clone IMAGE:4792470                                                                                   | -0.2172 | 0.0192 |
| 1569253_at   | INTS4     | integrator complex subunit 4                                                                               | -0.3538 | 0.0193 |
| 1569320_at   | GPBP1L1   | GC-rich promoter binding protein 1-like 1                                                                  | -1.1787 | 0.0273 |
| 1569331_at   |           | CDNA clone IMAGE:3923329                                                                                   | -0.1245 | 0.0116 |
| 1569342_at   | GLI3      | GLI-Kruppel family member GLI3 (Greig cephalopolysyndactyly syndrome)                                      | -0.1947 | 0.0357 |
| 1569354_at   | NSUN6     | NOL1/NOP2/Sun domain family; member 6                                                                      | -0.3699 | 0.0307 |
| 1569375_at   |           | CDNA clone IMAGE:4297546                                                                                   | -0.1455 | 0.0317 |
| 1569377_at   | TMEM67    | transmembrane protein 67                                                                                   | -0.9493 | 0.005  |
| 1569411_at   | TMEM67    | transmembrane protein 67                                                                                   | -0.162  | 0.0112 |
| 1569450_at   | CAPZA2    | capping protein (actin filament) muscle Z-line; alpha 2                                                    | -0.2106 | 0.0188 |
| 1569538_at   |           | Clone FLB8310 PRO2225                                                                                      | -0.4049 | 0.0428 |
| 1569540_at   |           |                                                                                                            | -2.5974 | 0.0007 |
| 1569601_at   |           | CDNA clone IMAGE:3935451                                                                                   | -0.4921 | 0.0119 |
| 1569630_a_at | RUFY2     | RUN and FYVE domain containing 2                                                                           | -0.1955 | 0.0089 |
| 1569652_at   | MLLT3     | myeloid/lymphoid or mixed-lineage leukemia (trithorax homolog; Drosophila); translocated to; 3             | -1.7757 | 0.003  |
| 1569701_at   | PER3      | Period homolog 3 (Drosophila)                                                                              | -0.4178 | 0.0414 |
| 1569770_x_at |           |                                                                                                            | -0.2103 | 0.0102 |
| 1569781_at   | LOC285423 | hypothetical gene supported by BC031092                                                                    | -0.1602 | 0.0051 |
| 1569794_at   |           | CDNA clone IMAGE:4824066                                                                                   | -0.2199 | 0.0127 |
| 1569796_s_at | ATRNL1    | attractin-like 1                                                                                           | -0.926  | 0.0288 |
| 1569813_at   | STRN      | striatin; calmodulin binding protein                                                                       | -0.2215 | 0.009  |
| 1569871_at   | LOC650392 | Full-length cDNA clone CS0DF015YK23 of Fetal brain of Homo sapiens (human), Hypothetical protein LOC650392 | -1.2475 | 0.0214 |
| 1569872_a_at | LOC650392 | Full-length cDNA clone CS0DF015YK23 of Fetal brain of Homo sapiens (human), Hypothetical protein LOC650392 | -2.8631 | 0.0073 |
| 1569900_at   | FLJ16124  | FLJ16124 protein                                                                                           | -0.1253 | 0.0497 |
| 1569962_at   |           | Homo sapiens; clone IMAGE:4850403; mRNA                                                                    | -0.1399 | 0.0301 |
| 1569975_at   |           | CDNA clone IMAGE:5301641                                                                                   | -0.1006 | 0.0074 |
| 1569990_at   | NUDT3     | nudix (nucleoside diphosphate linked moiety X)-type motif 3                                                | -0.1114 | 0.0188 |

|              |           |                                                                                                                                                                                                                                                                                                       |         |        |
|--------------|-----------|-------------------------------------------------------------------------------------------------------------------------------------------------------------------------------------------------------------------------------------------------------------------------------------------------------|---------|--------|
| 1569998_at   | MMD2      | monocyte to macrophage differentiation-associated 2                                                                                                                                                                                                                                                   | -0.1643 | 0.019  |
| 1570048_at   | DPH4      | DPH4; JJJ3 homolog ( <i>S. cerevisiae</i> )                                                                                                                                                                                                                                                           | -0.2997 | 0.0059 |
| 1570160_at   |           | CDNA clone IMAGE:4799031                                                                                                                                                                                                                                                                              | -0.1761 | 0.0357 |
| 1570173_at   | INTS7     | integrator complex subunit 7                                                                                                                                                                                                                                                                          | -0.3316 | 0.0307 |
| 1570190_at   | LSAMP     | Limbic system-associated membrane protein                                                                                                                                                                                                                                                             | -0.1392 | 0.0285 |
| 1570259_at   | LIMS1     | LIM and senescent cell antigen-like domains 1                                                                                                                                                                                                                                                         | -0.7883 | 0.0088 |
| 1570409_x_at |           | Clone pp9953 unknown mRNA                                                                                                                                                                                                                                                                             | -0.1466 | 0.0104 |
| 1570411_at   |           | Clone pp7683 unknown mRNA                                                                                                                                                                                                                                                                             | -0.1534 | 0.0425 |
| 1570412_at   |           | Pp10394                                                                                                                                                                                                                                                                                               | -0.729  | 0.0168 |
| 1570415_at   | DDX52     | DEAD (Asp-Glu-Ala-Asp) box polypeptide 52                                                                                                                                                                                                                                                             | -0.1973 | 0.0408 |
| 1570441_at   | NAPB      | N-ethylmaleimide-sensitive factor attachment protein; beta                                                                                                                                                                                                                                            | -0.8568 | 0.023  |
| 1570571_at   | CCDC91    | Coiled-coil domain containing 91                                                                                                                                                                                                                                                                      | -1.0438 | 0.0179 |
| 1570578_at   |           | CDNA clone IMAGE:5274593                                                                                                                                                                                                                                                                              | -0.2501 | 0.0239 |
| 1570588_at   |           | Homo sapiens; clone IMAGE:4703872; mRNA                                                                                                                                                                                                                                                               | -0.4456 | 0.0344 |
| 200038_s_at  | C18orf32  | chromosome 18 open reading frame 32, hCG22804, hCG39912, ribosomal protein L17                                                                                                                                                                                                                        | -0.2523 | 0.0422 |
| 200094_s_at  | EEF2      | eukaryotic translation elongation factor 2                                                                                                                                                                                                                                                            | -0.2968 | 0.0205 |
| 200601_at    | ACTN4     | actinin; alpha 4                                                                                                                                                                                                                                                                                      | -0.4216 | 0.0208 |
| 200630_x_at  | SET       | SET translocation (myeloid leukemia-associated)                                                                                                                                                                                                                                                       | -0.4385 | 0.0068 |
| 200631_s_at  | SET       | SET translocation (myeloid leukemia-associated)                                                                                                                                                                                                                                                       | -0.4275 | 0.0212 |
| 200635_s_at  | PTPRF     | protein tyrosine phosphatase; receptor type; F                                                                                                                                                                                                                                                        | -1.1986 | 0.0059 |
| 200636_s_at  | PTPRF     | protein tyrosine phosphatase; receptor type; F                                                                                                                                                                                                                                                        | -1.6202 | 0.0071 |
| 200644_at    | MARCKSL1  | MARCKS-like 1                                                                                                                                                                                                                                                                                         | -0.9511 | 0.0438 |
| 200733_s_at  | PTP4A1    | protein tyrosine phosphatase type IVA; member 1                                                                                                                                                                                                                                                       | -0.4605 | 0.0358 |
| 200747_s_at  | NUMA1     | nuclear mitotic apparatus protein 1                                                                                                                                                                                                                                                                   | -0.9137 | 0.013  |
| 200762_at    | DPYSL2    | dihydropyrimidinase-like 2                                                                                                                                                                                                                                                                            | -0.8321 | 0.0277 |
| 200774_at    | FAM120A   | family with sequence similarity 120A                                                                                                                                                                                                                                                                  | -0.1955 | 0.0498 |
| 200789_at    | ECH1      | enoyl Coenzyme A hydratase 1; peroxisomal                                                                                                                                                                                                                                                             | -0.5323 | 0.0436 |
| 200807_s_at  | HSPD1     | heat shock 60kDa protein 1 (chaperonin)                                                                                                                                                                                                                                                               | -0.1883 | 0.0209 |
| 200831_s_at  | SCD       | stearoyl-CoA desaturase (delta-9-desaturase)                                                                                                                                                                                                                                                          | -2.0949 | 0.0361 |
| 200862_at    | DHCR24    | 24-dehydrocholesterol reductase                                                                                                                                                                                                                                                                       | -0.9975 | 0.0016 |
| 200911_s_at  | TACC1     | transforming; acidic coiled-coil containing protein 1                                                                                                                                                                                                                                                 | -0.5798 | 0.0275 |
| 200940_s_at  | RERE      | arginine-glutamic acid dipeptide (RE) repeats                                                                                                                                                                                                                                                         | -0.8322 | 0.0297 |
| 200962_at    | RPL31     | ribosomal protein L31                                                                                                                                                                                                                                                                                 | -1.5835 | 0.0021 |
| 201061_s_at  | STOM      | stomatins                                                                                                                                                                                                                                                                                             | -0.4327 | 0.0498 |
| 201070_x_at  | SF3B1     | splicing factor 3b; subunit 1; 155kDa                                                                                                                                                                                                                                                                 | -0.8704 | 0.039  |
| 201071_x_at  | SF3B1     | splicing factor 3b; subunit 1; 155kDa                                                                                                                                                                                                                                                                 | -0.3405 | 0.0326 |
| 201103_x_at  | LOC728980 | hypothetical protein LOC728980, neuroblastoma breakpoint family; member 10, neuroblastoma breakpoint family; member 11, neuroblastoma breakpoint family; member 15, neuroblastoma breakpoint family; member 16, neuroblastoma breakpoint family; member 20, neuroblastoma breakpoint family; member 8 | -0.4207 | 0.0176 |
| 201147_s_at  | TIMP3     | TIMP metalloproteinase inhibitor 3 (Sorsby fundus dystrophy; pseudoinflammatory)                                                                                                                                                                                                                      | -2.2727 | 0.0172 |
| 201148_s_at  | TIMP3     | TIMP metalloproteinase inhibitor 3 (Sorsby fundus dystrophy; pseudoinflammatory)                                                                                                                                                                                                                      | -2.1708 | 0.0111 |
| 201149_s_at  | TIMP3     | TIMP metalloproteinase inhibitor 3 (Sorsby fundus dystrophy; pseudoinflammatory)                                                                                                                                                                                                                      | -2.4858 | 0.0085 |
| 201150_s_at  | TIMP3     | TIMP metalloproteinase inhibitor 3 (Sorsby fundus dystrophy; pseudoinflammatory)                                                                                                                                                                                                                      | -2.1202 | 0.0022 |
| 201166_s_at  | PUM1      | pumilio homolog 1 ( <i>Drosophila</i> )                                                                                                                                                                                                                                                               | -0.3192 | 0.0191 |
| 201207_at    | TNFAIP1   | tumor necrosis factor; alpha-induced protein 1 (endothelial)                                                                                                                                                                                                                                          | -0.6102 | 0.0292 |
| 201217_x_at  | RPL3      | ribosomal protein L3                                                                                                                                                                                                                                                                                  | -0.2655 | 0.0035 |
| 201246_s_at  | OTUB1     | OTU domain; ubiquitin aldehyde binding 1                                                                                                                                                                                                                                                              | -0.3205 | 0.0453 |
| 201247_at    | SREBF2    | sterol regulatory element binding transcription factor 2                                                                                                                                                                                                                                              | -1.1517 | 0.0117 |
| 201248_s_at  | SREBF2    | sterol regulatory element binding transcription factor 2                                                                                                                                                                                                                                              | -1.0351 | 0.0275 |
| 201261_x_at  | BGN       | biglycan                                                                                                                                                                                                                                                                                              | -1.0026 | 0.043  |
| 201262_s_at  | BGN       | biglycan                                                                                                                                                                                                                                                                                              | -0.892  | 0.0443 |

|             |           |                                                                              |         |        |
|-------------|-----------|------------------------------------------------------------------------------|---------|--------|
| 201278_at   | DAB2      | disabled homolog 2; mitogen-responsive phosphoprotein (Drosophila)           | -1.4029 | 0.0139 |
| 201279_s_at | DAB2      | disabled homolog 2; mitogen-responsive phosphoprotein (Drosophila)           | -1.6454 | 0.019  |
| 201280_s_at | DAB2      | disabled homolog 2; mitogen-responsive phosphoprotein (Drosophila)           | -1.383  | 0.0296 |
| 201294_s_at | WSB1      | WD repeat and SOCS box-containing 1                                          | -1.2455 | 0.0448 |
| 201295_s_at |           |                                                                              | -1.4978 | 0.0332 |
| 201310_s_at | C5orf13   | chromosome 5 open reading frame 13                                           | -0.8807 | 0.0105 |
| 201334_s_at | ARHGEF12  | Rho guanine nucleotide exchange factor (GEF) 12                              | -0.4348 | 0.0202 |
| 201341_at   | ENC1      | ectodermal-neural cortex (with BTB-like domain)                              | -1.6637 | 0.029  |
| 201353_s_at | BAZ2A     | bromodomain adjacent to zinc finger domain; 2A                               | -0.5126 | 0.0238 |
| 201362_at   | IVNS1ABP  | influenza virus NS1A binding protein                                         | -0.7184 | 0.0381 |
| 201372_s_at | CUL3      | cullin 3                                                                     | -0.3169 | 0.0121 |
| 201377_at   | UBAP2L    | ubiquitin associated protein 2-like                                          | -0.8011 | 0.023  |
| 201446_s_at | TIA1      | TIA1 cytotoxic granule-associated RNA binding protein                        | -1.1533 | 0.0296 |
| 201448_at   | TIA1      | TIA1 cytotoxic granule-associated RNA binding protein                        | -0.6274 | 0.0381 |
| 201450_s_at | TIA1      | TIA1 cytotoxic granule-associated RNA binding protein                        | -0.9188 | 0.0187 |
| 201458_s_at | BUB3      | BUB3 budding uninhibited by benzimidazoles 3 homolog (yeast)                 | -0.5953 | 0.0347 |
| 201505_at   | LAMB1     | laminin; beta 1                                                              | -1.4301 | 0.0135 |
| 201540_at   | FHL1      | four and a half LIM domains 1                                                | -1.3574 | 0.0261 |
| 201564_s_at | FSCN1     | fascin homolog 1; actin-bundling protein (Strongylocentrotus purpuratus)     | -1.3594 | 0.0421 |
| 201598_s_at | INPPL1    | inositol polyphosphate phosphatase-like 1                                    | -0.4455 | 0.0405 |
| 201623_s_at | DARS      | aspartyl-tRNA synthetase                                                     | -0.431  | 0.0068 |
| 201624_at   | DARS      | aspartyl-tRNA synthetase                                                     | -0.6452 | 0.0127 |
| 201634_s_at | CYB5B     | cytochrome b5 type B (outer mitochondrial membrane)                          | -0.5896 | 0.0373 |
| 201655_s_at | HSPG2     | heparan sulfate proteoglycan 2                                               | -0.7861 | 0.0162 |
| 201800_s_at | OSBP      | oxysterol binding protein                                                    | -0.3161 | 0.0266 |
| 201810_s_at | SH3BP5    | SH3-domain binding protein 5 (BTK-associated)                                | -1.0678 | 0.0412 |
| 201819_at   | SCARB1    | scavenger receptor class B; member 1                                         | -1.1481 | 0.0242 |
| 201849_at   | BNIP3     | BCL2/adenovirus E1B 19kDa interacting protein 3                              | -0.7522 | 0.0137 |
| 201875_s_at | LOC644387 | myelin protein zero-like 1, similar to myelin protein zero-like 1 isoform a  | -0.5783 | 0.0247 |
| 201893_x_at | DCN       | decorin                                                                      | -2.7527 | 0.0366 |
| 201910_at   | FARP1     | FERM; RhoGEF (ARHGEF) and pleckstrin domain protein 1 (chondrocyte-derived)  | -1.6324 | 0.0434 |
| 201916_s_at | SEC63     | SEC63 homolog (S. cerevisiae)                                                | -0.3092 | 0.0207 |
| 201925_s_at | CD55      | CD55 molecule; decay accelerating factor for complement (Cromer blood group) | -1.6629 | 0.0187 |
| 201926_s_at | CD55      | CD55 molecule; decay accelerating factor for complement (Cromer blood group) | -1.8534 | 0.0093 |
| 201957_at   | PPP1R12B  | protein phosphatase 1; regulatory (inhibitor) subunit 12B                    | -0.5273 | 0.0134 |
| 201991_s_at | KIF5B     | kinesin family member 5B                                                     | -0.4652 | 0.0017 |
| 202022_at   | ALDOC     | aldolase C; fructose-bisphosphate                                            | -2.3962 | 0.0097 |
| 202068_s_at | LDLR      | low density lipoprotein receptor (familial hypercholesterolemia)             | -1.3547 | 0.0294 |
| 202082_s_at | SEC14L1   | SEC14-like 1 (S. cerevisiae)                                                 | -1.2221 | 0.0002 |
| 202083_s_at | SEC14L1   | SEC14-like 1 (S. cerevisiae)                                                 | -1.1378 | 0.004  |
| 202084_s_at | SEC14L1   | SEC14-like 1 (S. cerevisiae)                                                 | -0.8543 | 0.0017 |
| 202124_s_at | TRAK2     | trafficking protein; kinesin binding 2                                       | -0.7333 | 0.0377 |
| 202127_at   | PRPF4B    | PRP4 pre-mRNA processing factor 4 homolog B (yeast)                          | -0.8449 | 0.0267 |
| 202130_at   | RIOK3     | RIO kinase 3 (yeast)                                                         | -0.9022 | 0.0021 |
| 202132_at   | WWTR1     | WW domain containing transcription regulator 1                               | -1.0083 | 0.0056 |
| 202133_at   | WWTR1     | WW domain containing transcription regulator 1                               | -0.8018 | 0.0023 |
| 202173_s_at | VEZF1     | vascular endothelial zinc finger 1                                           | -0.5856 | 0.0035 |
| 202218_s_at | FADS2     | fatty acid desaturase 2                                                      | -0.8537 | 0.0323 |
| 202308_at   | SREBF1    | sterol regulatory element binding transcription factor 1                     | -1.4199 | 0.0063 |
| 202314_at   | CYP51A1   | cytochrome P450; family 51; subfamily A; polypeptide 1                       | -0.6612 | 0.0374 |
| 202432_at   | PPP3CB    | protein phosphatase 3 (formerly 2B); catalytic subunit; beta isoform         | -0.3722 | 0.0179 |

|             |               |                                                                                               |         |        |
|-------------|---------------|-----------------------------------------------------------------------------------------------|---------|--------|
| 202452_at   | ZER1          | zer-1 homolog ( <i>C. elegans</i> )                                                           | -0.4555 | 0.0296 |
| 202465_at   | PCOLCE        | procollagen C-endopeptidase enhancer                                                          | -2.5473 | 0.0151 |
| 202468_s_at | CTNNAL1       | catenin (cadherin-associated protein); alpha-like 1                                           | -1.0119 | 0.0124 |
| 202478_at   | TRIB2         | tribbles homolog 2 ( <i>Drosophila</i> )                                                      | -1.5861 | 0.0238 |
| 202479_s_at | TRIB2         | tribbles homolog 2 ( <i>Drosophila</i> )                                                      | -1.4005 | 0.0184 |
| 202492_at   | ATG9A         | ATG9 autophagy related 9 homolog A ( <i>S. cerevisiae</i> )                                   | -1.1528 | 0.0011 |
| 202501_at   | MAPRE2        | microtubule-associated protein; RP/EB family; member 2                                        | -0.8817 | 0.0039 |
| 202554_s_at | GSTM3         | glutathione S-transferase M3 (brain)                                                          | -1.779  | 0.0064 |
| 202563_at   | C14orf1       | chromosome 14 open reading frame 1                                                            | -0.2677 | 0.0287 |
| 202573_at   | CSNK1G2       | casein kinase 1; gamma 2                                                                      | -0.3062 | 0.0109 |
| 202575_at   | CRABP2        | cellular retinoic acid binding protein 2                                                      | -1.6243 | 0.0267 |
| 202627_s_at | SERPINE1      | serpin peptidase inhibitor; clade E (nexin; plasminogen activator inhibitor type 1); member 1 | -2.1344 | 0.0228 |
| 202628_s_at | SERPINE1      | serpin peptidase inhibitor; clade E (nexin; plasminogen activator inhibitor type 1); member 1 | -1.6947 | 0.0462 |
| 202651_at   | LPGAT1        | lysophosphatidylglycerol acyltransferase 1                                                    | -1.1384 | 0.0159 |
| 202679_at   | NPC1          | Niemann-Pick disease; type C1                                                                 | -0.9789 | 0.0266 |
| 202683_s_at | RNMT          | RNA (guanine-7-) methyltransferase                                                            | -0.5247 | 0.0083 |
| 202704_at   | TOB1          | transducer of ERBB2; 1                                                                        | -0.5716 | 0.0305 |
| 202718_at   | IGFBP2        | insulin-like growth factor binding protein 2; 36kDa                                           | -1.5872 | 0.0225 |
| 202728_s_at | LTBP1         | latent transforming growth factor beta binding protein 1                                      | -1.0049 | 0.0247 |
| 202757_at   | RP13-122B23.3 | cofactor of BRCA1                                                                             | -0.4928 | 0.0169 |
| 202795_x_at | TRIOBP        | TRIO and F-actin binding protein                                                              | -0.5897 | 0.0139 |
| 202817_s_at | SS18          | synovial sarcoma translocation; chromosome 18                                                 | -1.1431 | 0.0095 |
| 202861_at   | PER1          | period homolog 1 ( <i>Drosophila</i> )                                                        | -0.937  | 0.0284 |
| 202912_at   | ADM           | adrenomedullin                                                                                | -1.7112 | 0.019  |
| 202932_at   | YES1          | v-yes-1 Yamaguchi sarcoma viral oncogene homolog 1                                            | -0.6702 | 0.037  |
| 202933_s_at | YES1          | v-yes-1 Yamaguchi sarcoma viral oncogene homolog 1                                            | -0.5199 | 0.0192 |
| 203005_at   | LTBR          | lymphotoxin beta receptor (TNFR superfamily; member 3)                                        | -0.8156 | 0.0442 |
| 203026_at   | ZBTB5         | zinc finger and BTB domain containing 5                                                       | -0.7268 | 0.0206 |
| 203058_s_at | PAPSS2        | 3'-phosphoadenosine 5'-phosphosulfate synthase 2                                              | -1.8466 | 0.0217 |
| 203060_s_at | PAPSS2        | 3'-phosphoadenosine 5'-phosphosulfate synthase 2                                              | -1.7826 | 0.022  |
| 203067_at   | PDHX          | pyruvate dehydrogenase complex; component X                                                   | -0.6423 | 0.0335 |
| 203080_s_at | BAZ2B         | bromodomain adjacent to zinc finger domain; 2B                                                | -1.0107 | 0.0206 |
| 203088_at   | FBLN5         | fibulin 5                                                                                     | -1.5251 | 0.0118 |
| 203169_at   | KIAA0258      | KIAA0258                                                                                      | -0.3063 | 0.0092 |
| 203192_at   | ABCB6         | ATP-binding cassette; sub-family B (MDR/TAP); member 6                                        | -1.4358 | 0.0422 |
| 203217_s_at | ST3GAL5       | ST3 beta-galactoside alpha-2,3-sialyltransferase 5                                            | -1.1928 | 0.0391 |
| 203221_at   | TLE1          | transducin-like enhancer of split 1 (E(sp1) homolog; <i>Drosophila</i> )                      | -1.0081 | 0.0029 |
| 203229_s_at | CLK2          | CDC-like kinase 2                                                                             | -0.7447 | 0.0299 |
| 203232_s_at | ATXN1         | ataxin 1                                                                                      | -1.1276 | 0.0102 |
| 203245_s_at | FLJ35348      | FLJ35348                                                                                      | -0.9408 | 0.0129 |
| 203247_s_at | ZNF24         | zinc finger protein 24                                                                        | -0.6128 | 0.0006 |
| 203255_at   | FBXO11        | F-box protein 11                                                                              | -0.9998 | 0.0081 |
| 203278_s_at | PHF21A        | PHD finger protein 21A                                                                        | -0.8821 | 0.0106 |
| 203297_s_at | JARID2        | jumonji; AT rich interactive domain 2                                                         | -0.8122 | 0.0155 |
| 203306_s_at | SLC35A1       | solute carrier family 35 (CMP-sialic acid transporter); member A1                             | -0.4838 | 0.0438 |
| 203318_s_at | ZNF148        | zinc finger protein 148                                                                       | -0.7836 | 0.0011 |
| 203319_s_at | ZNF148        | zinc finger protein 148                                                                       | -0.8172 | 0.0103 |
| 203321_s_at | ADNP2         | ADNP homeobox 2                                                                               | -0.6796 | 0.0229 |
| 203341_at   | CEBPZ         | CCAAT/enhancer binding protein zeta                                                           | -0.4623 | 0.0221 |
| 203348_s_at | ETV5          | ets variant gene 5 (ets-related molecule)                                                     | -1.5517 | 0.017  |
| 203354_s_at | PSD3          | pleckstrin and Sec7 domain containing 3                                                       | -1.9726 | 0.015  |
| 203355_s_at | PSD3          | pleckstrin and Sec7 domain containing 3                                                       | -1.8088 | 0.0357 |
| 203394_s_at | HES1          | hairy and enhancer of split 1; ( <i>Drosophila</i> )                                          | -1.4218 | 0.0019 |
| 203395_s_at | HES1          | hairy and enhancer of split 1; ( <i>Drosophila</i> )                                          | -0.9071 | 0.0065 |
| 203424_s_at | IGFBP5        | insulin-like growth factor binding protein 5                                                  | -1.2952 | 0.0339 |

|             |          |                                                                                                                                                    |         |        |
|-------------|----------|----------------------------------------------------------------------------------------------------------------------------------------------------|---------|--------|
| 203425_s_at | IGFBP5   | insulin-like growth factor binding protein 5                                                                                                       | -0.4751 | 0.0334 |
| 203450_at   | CBY1     | chibby homolog 1 (Drosophila)                                                                                                                      | -0.593  | 0.0357 |
| 203494_s_at | CEP57    | centrosomal protein 57kDa                                                                                                                          | -0.6087 | 0.0225 |
| 203505_at   | ABCA1    | ATP-binding cassette; sub-family A (ABC1); member 1                                                                                                | -0.886  | 0.046  |
| 203545_at   | ALG8     | asparagine-linked glycosylation 8 homolog (S. cerevisiae; alpha-1,3-glucosyltransferase)                                                           | -0.5101 | 0.0259 |
| 203560_at   | GGH      | gamma-glutamyl hydrolase (conjugase; foyllypolygammaglutamyl hydrolase)                                                                            | -1.3121 | 0.0214 |
| 203604_at   | ZNF516   | zinc finger protein 516                                                                                                                            | -0.8064 | 0.0008 |
| 203646_at   | FDX1     | ferredoxin 1                                                                                                                                       | -1.0004 | 0.0093 |
| 203647_s_at | FDX1     | ferredoxin 1                                                                                                                                       | -1.1274 | 0.0056 |
| 203680_at   | PRKAR2B  | protein kinase; cAMP-dependent; regulatory; type II; beta                                                                                          | -1.4523 | 0.0378 |
| 203753_at   | TCF4     | transcription factor 4                                                                                                                             | -0.8049 | 0.0238 |
| 203759_at   | ST3GAL4  | ST3 beta-galactoside alpha-2,3-sialyltransferase 4                                                                                                 | -0.8422 | 0.0076 |
| 203794_at   | CDC42BPA | CDC42 binding protein kinase alpha (DMPK-like)                                                                                                     | -0.9139 | 0.0187 |
| 203799_at   | CD302    | CD302 molecule                                                                                                                                     | -1.531  | 0.0173 |
| 203825_at   | BRD3     | bromodomain containing 3                                                                                                                           | -1.0913 | 0.0005 |
| 203835_at   | LRR32    | leucine rich repeat containing 32                                                                                                                  | -1.001  | 0.033  |
| 203846_at   | TRIM32   | tripartite motif-containing 32                                                                                                                     | -0.8601 | 0.0345 |
| 203955_at   | KIAA0649 | KIAA0649                                                                                                                                           | -0.5771 | 0.028  |
| 203959_s_at | ZBTB40   | zinc finger and BTB domain containing 40                                                                                                           | -0.5909 | 0.0446 |
| 203971_at   | SLC31A1  | solute carrier family 31 (copper transporters); member 1                                                                                           | -0.9838 | 0.0358 |
| 204028_s_at | RABGAP1  | RAB GTPase activating protein 1                                                                                                                    | -0.5081 | 0.0447 |
| 204040_at   | RNF144A  | ring finger protein 144A                                                                                                                           | -1.3553 | 0.0008 |
| 204042_at   | WASF3    | WAS protein family; member 3                                                                                                                       | -1.5852 | 0.0347 |
| 204049_s_at | PHACTR2  | phosphatase and actin regulator 2                                                                                                                  | -1.2673 | 0.0385 |
| 204077_x_at | ENTPD4   | ectonucleoside triphosphate diphosphohydrolase 4                                                                                                   | -0.3504 | 0.035  |
| 204082_at   | PBX3     | pre-B-cell leukemia homeobox 3                                                                                                                     | -1.2477 | 0.0158 |
| 204094_s_at | TSC22D2  | TSC22 domain family; member 2                                                                                                                      | -0.7208 | 0.0093 |
| 204102_s_at | EEF2     | eukaryotic translation elongation factor 2                                                                                                         | -0.2457 | 0.0407 |
| 204106_at   | TESK1    | testis-specific kinase 1                                                                                                                           | -1.0463 | 0.0086 |
| 204134_at   | PDE2A    | phosphodiesterase 2A; cGMP-stimulated                                                                                                              | -3.1639 | 0.0016 |
| 204143_s_at | ENOSF1   | enolase superfamily member 1                                                                                                                       | -0.7292 | 0.0382 |
| 204182_s_at | ZBTB43   | zinc finger and BTB domain containing 43                                                                                                           | -0.886  | 0.0327 |
| 204233_s_at | CHKA     | choline kinase alpha                                                                                                                               | -1.1469 | 0.0005 |
| 204266_s_at | CHKA     | choline kinase alpha, similar to choline kinase alpha isoform a                                                                                    | -1.2971 | 0.0004 |
| 204288_s_at | SORBS2   | sorbin and SH3 domain containing 2                                                                                                                 | -2.0803 | 0.0152 |
| 204323_x_at | NF1      | neurofibromin 1 (neurofibromatosis; von Recklinghausen disease; Watson disease)                                                                    | -0.3197 | 0.0247 |
| 204461_x_at | RAD1     | RAD1 homolog (S. pombe)                                                                                                                            | -0.5615 | 0.0353 |
| 204569_at   | ICK      | intestinal cell (MAK-like) kinase                                                                                                                  | -1.0788 | 0.0324 |
| 204595_s_at | STC1     | stanniocalcin 1                                                                                                                                    | -1.8765 | 0.0411 |
| 204688_at   | SGCE     | sarcoglycan; epsilon                                                                                                                               | -1.6329 | 0.0422 |
| 204706_at   | INPP5E   | inositol polyphosphate-5-phosphatase; 72 kDa                                                                                                       | -0.5739 | 0.0411 |
| 204711_at   | KIAA0753 | KIAA0753                                                                                                                                           | -0.5378 | 0.0426 |
| 204731_at   | TGFR3    | transforming growth factor; beta receptor III                                                                                                      | -1.4186 | 0.0382 |
| 204760_s_at | NR1D1    | nuclear receptor subfamily 1; group D; member 1, thyroid hormone receptor; alpha (erythroblastic leukemia viral (v-erb-a) oncogene homolog; avian) | -1.7556 | 0.0009 |
| 204771_s_at | TTF1     | transcription termination factor; RNA polymerase I                                                                                                 | -0.7138 | 0.0063 |
| 204790_at   | SMAD7    | SMAD family member 7                                                                                                                               | -0.9167 | 0.0389 |
| 204842_x_at | PRKAR2A  | protein kinase; cAMP-dependent; regulatory; type II; alpha                                                                                         | -0.3154 | 0.036  |
| 204881_s_at | UGCG     | UDP-glucose ceramide glucosyltransferase                                                                                                           | -1.767  | 0.0002 |
| 204894_s_at | AOC3     | amine oxidase; copper containing 3 (vascular adhesion protein 1)                                                                                   | -2.4254 | 0.0109 |
| 204915_s_at | SOX11    | SRY (sex determining region Y)-box 11                                                                                                              | -0.1576 | 0.0246 |
| 204917_s_at | MLLT3    | myeloid/lymphoid or mixed-lineage leukemia (trithorax homolog; Drosophila); translocated to; 3                                                     | -1.0636 | 0.0175 |
| 204948_s_at | FST      | follistatin                                                                                                                                        | -1.4119 | 0.0496 |
| 204955_at   | SRPX     | sushi-repeat-containing protein; X-linked                                                                                                          | -2.2573 | 0.021  |

|             |                 |                                                                                            |         |        |
|-------------|-----------------|--------------------------------------------------------------------------------------------|---------|--------|
| 205002_at   | AHDC1           | AT hook; DNA binding motif; containing 1                                                   | -0.9774 | 0.0263 |
| 205032_at   | ITGA2           | integrin; alpha 2 (CD49B; alpha 2 subunit of VLA-2 receptor)                               | -1.4207 | 0.0163 |
| 205174_s_at | QPCT            | glutaminy-peptide cyclotransferase (glutaminy cyclase)                                     | -1.5703 | 0.0318 |
| 205181_at   | ZNF193          | zinc finger protein 193                                                                    | -1.1523 | 0.0138 |
| 205253_at   | PBX1            | pre-B-cell leukemia homeobox 1                                                             | -1.5762 | 0.0142 |
| 205381_at   | LRRC17          | leucine rich repeat containing 17                                                          | -2.0217 | 0.0394 |
| 205383_s_at | ZBTB20          | zinc finger and BTB domain containing 20                                                   | -1.1469 | 0.0161 |
| 205409_at   | FOSL2           | FOS-like antigen 2                                                                         | -0.6273 | 0.016  |
| 205434_s_at | AAK1            | AP2 associated kinase 1                                                                    | -0.5527 | 0.0316 |
| 205459_s_at | NPAS2           | neuronal PAS domain protein 2                                                              | -0.5687 | 0.0269 |
| 205460_at   | NPAS2           | neuronal PAS domain protein 2                                                              | -0.4902 | 0.0299 |
| 205471_s_at | DACH1           | dachshund homolog 1 (Drosophila)                                                           | -1.9519 | 0.0456 |
| 205472_s_at | DACH1           | dachshund homolog 1 (Drosophila)                                                           | -1.497  | 0.0072 |
| 205492_s_at | DPYSL4          | dihydropyrimidinase-like 4                                                                 | -0.6372 | 0.0357 |
| 205493_s_at | DPYSL4          | dihydropyrimidinase-like 4                                                                 | -2.4688 | 0.0087 |
| 205516_x_at | CIZ1            | CDKN1A interacting zinc finger protein 1                                                   | -0.7836 | 0.0302 |
| 205517_at   | GATA4           | GATA binding protein 4                                                                     | -1.6954 | 0.0095 |
| 205585_at   | ETV6            | ets variant gene 6 (TEL oncogene)                                                          | -0.4524 | 0.0063 |
| 205593_s_at | PDE9A           | phosphodiesterase 9A                                                                       | -0.9473 | 0.0341 |
| 205594_at   | ZNF652          | zinc finger protein 652                                                                    | -1.2018 | 0.0157 |
| 205597_at   | SLC44A4         | solute carrier family 44; member 4                                                         | -1.2337 | 0.0104 |
| 205655_at   | MDM4            | Mdm4; transformed 3T3 cell double minute 4; p53 binding protein (mouse)                    | -0.3132 | 0.0346 |
| 205706_s_at | ANKRD26         | ankyrin repeat domain 26                                                                   | -0.4641 | 0.0148 |
| 205735_s_at | AFF3            | AF4/FMR2 family; member 3                                                                  | -0.3261 | 0.0435 |
| 205771_s_at | AKAP7           | A kinase (PRKA) anchor protein 7                                                           | -1.1601 | 0.0263 |
| 205780_at   | BIK             | BCL2-interacting killer (apoptosis-inducing)                                               | -1.2444 | 0.0436 |
| 205917_at   | ZNF264          | zinc finger protein 264                                                                    | -0.9701 | 0.0415 |
| 206009_at   | ITGA9           | integrin; alpha 9                                                                          | -1.1686 | 0.0024 |
| 206091_at   | MATN3           | matrilin 3                                                                                 | -1.324  | 0.0491 |
| 206093_x_at | TNXB            | tenascin XB                                                                                | -1.9806 | 0.0039 |
| 206114_at   | EPHA4           | EPH receptor A4                                                                            | -1.4194 | 0.0204 |
| 206172_at   | IL13RA2         | interleukin 13 receptor; alpha 2                                                           | -2.7176 | 0.0362 |
| 206245_s_at | IVNS1ABP        | influenza virus NS1A binding protein                                                       | -0.668  | 0.0361 |
| 206249_at   | MAP3K13         | mitogen-activated protein kinase kinase kinase 13                                          | -0.9003 | 0.0042 |
| 206251_s_at | AVPR1A          | arginine vasopressin receptor 1A                                                           | -0.21   | 0.0029 |
| 206292_s_at | SULT2A1         | sulfotransferase family; cytosolic; 2A; dehydroepiandrosterone (DHEA)-preferring; member 1 | -2.2848 | 0.0113 |
| 206294_at   | HSD3B2          | hydroxy-delta-5-steroid dehydrogenase; 3 beta- and steroid delta-isomerase 2               | -4.3946 | 0.0002 |
| 206307_s_at | FOXD1           | forkhead box D1                                                                            | -2.2543 | 0.0139 |
| 206548_at   | hCG_177625<br>9 | hypothetical protein FLJ23556                                                              | -1.0302 | 0.0249 |
| 206686_at   | PDK1            | pyruvate dehydrogenase kinase; isozyme 1                                                   | -0.935  | 0.031  |
| 206755_at   | CYP2B6          | cytochrome P450; family 2; subfamily B; polypeptide 6                                      | -0.1147 | 0.05   |
| 206767_at   | RBMS3           | RNA binding motif; single stranded interacting protein                                     | -0.7097 | 0.0336 |
| 206848_at   | HOXA7           | homeobox A7                                                                                | -2.3073 | 0.0006 |
| 206874_s_at | SLK             | STE20-like kinase (yeast)                                                                  | -0.6901 | 0.0265 |
| 206927_s_at | GUCY1A2         | guanylate cyclase 1; soluble; alpha 2                                                      | -0.1869 | 0.0386 |
| 206929_s_at | NFIC            | nuclear factor I/C (CCAAT-binding transcription factor)                                    | -0.8834 | 0.0237 |
| 207030_s_at | CSRP2           | cysteine and glycine-rich protein 2                                                        | -1.4809 | 0.0185 |
| 207043_s_at | SLC6A9          | solute carrier family 6 (neurotransmitter transporter; glycine); member 9                  | -0.8187 | 0.0226 |
| 207143_at   | CDK6            | cyclin-dependent kinase 6                                                                  | -0.2552 | 0.0476 |
| 207190_at   | ZZEF1           | zinc finger; ZZ-type with EF-hand domain 1                                                 | -0.5969 | 0.0348 |
| 207263_x_at | VEZT            | vezatin; adherens junctions transmembrane protein                                          | -0.4236 | 0.0206 |
| 207283_at   | RPL23AP13       | ribosomal protein L23a pseudogene 13                                                       | -0.8518 | 0.0063 |
| 207292_s_at | MAPK7           | mitogen-activated protein kinase 7                                                         | -0.5817 | 0.0078 |
| 207305_s_at | KIAA1012        | KIAA1012                                                                                   | -0.4293 | 0.0236 |
| 207345_at   | FST             | follistatin                                                                                | -0.7228 | 0.048  |
| 207365_x_at | USP34           | ubiquitin specific peptidase 34                                                            | -0.6747 | 0.0239 |

|             |               |                                                                                                              |         |        |
|-------------|---------------|--------------------------------------------------------------------------------------------------------------|---------|--------|
| 207401_at   | PROX1         | prospero homeobox 1                                                                                          | -1.1713 | 0.0179 |
| 207426_s_at | TNFSF4        | tumor necrosis factor (ligand) superfamily; member 4 (tax-transcriptionally activated glycoprotein 1; 34kDa) | -2.1316 | 0.0422 |
| 207464_at   | AHCYL1        | S-adenosylhomocysteine hydrolase-like 1                                                                      | -0.2228 | 0.0073 |
| 207470_at   | DKFZp566H0824 | hypothetical protein DKFZp566H0824                                                                           | -0.1394 | 0.0077 |
| 207471_at   |               |                                                                                                              | -0.1172 | 0.0474 |
| 207492_at   | NGLY1         | N-glycanase 1                                                                                                | -0.5854 | 0.0461 |
| 207606_s_at | ARHGAP12      | Rho GTPase activating protein 12                                                                             | -0.8951 | 0.0189 |
| 207711_at   | C20orf117     | chromosome 20 open reading frame 117                                                                         | -0.7395 | 0.0395 |
| 207737_at   |               |                                                                                                              | -0.2142 | 0.001  |
| 207750_at   | EPS15L2       | epidermal growth factor receptor pathway substrate 15-like 2                                                 | -0.1541 | 0.0008 |
| 207819_s_at | ABCB4         | ATP-binding cassette; sub-family B (MDR/TAP); member 4                                                       | -3.3743 | 0.0182 |
| 207836_s_at | RBPMS         | RNA binding protein with multiple splicing                                                                   | -1.1966 | 0.0399 |
| 207837_at   | RBPMS         | RNA binding protein with multiple splicing                                                                   | -0.2327 | 0.0226 |
| 207953_at   | RP5-886K2.1   | neuronal thread protein AD7c-NTP                                                                             | -0.3297 | 0.0092 |
| 207954_at   | GATA2         | GATA binding protein 2                                                                                       | -0.1058 | 0.0325 |
| 207981_s_at | ESRRG         | estrogen-related receptor gamma                                                                              | -1.8399 | 0.0362 |
| 208143_s_at | FAM12A        | family with sequence similarity 12; member A                                                                 | -0.1375 | 0.0254 |
| 208154_at   | LOC51336      | mesenchymal stem cell protein DSCD28                                                                         | -0.3097 | 0.0389 |
| 208185_x_at |               |                                                                                                              | -0.1748 | 0.0394 |
| 208216_at   | DLX4          | distal-less homeobox 4                                                                                       | -0.2579 | 0.0144 |
| 208238_x_at |               |                                                                                                              | -0.2458 | 0.0392 |
| 208300_at   | PTPRH         | protein tyrosine phosphatase; receptor type; H                                                               | -0.9366 | 0.038  |
| 208324_at   |               |                                                                                                              | -0.165  | 0.0418 |
| 208491_s_at | PGM5          | phosphoglucomutase 5                                                                                         | -1.2238 | 0.0185 |
| 208606_s_at | WNT4          | wingless-type MMTV integration site family; member 4                                                         | -2.9669 | 0.0083 |
| 208609_s_at | TNXA          | tenascin XA pseudogene, tenascin XB                                                                          | -2.1933 | 0.013  |
| 208611_s_at | SPTAN1        | spectrin; alpha; non-erythrocytic 1 (alpha-fodrin)                                                           | -0.7115 | 0.0287 |
| 208619_at   | DDB1          | damage-specific DNA binding protein 1; 127kDa                                                                | -0.3536 | 0.0321 |
| 208720_s_at | RBM39         | RNA binding motif protein 39                                                                                 | -0.2713 | 0.043  |
| 208794_s_at | SMARCA4       | SWI/SNF related; matrix associated; actin dependent regulator of chromatin; subfamily a; member 4            | -0.804  | 0.0094 |
| 208820_at   | PTK2          | PTK2 protein tyrosine kinase 2                                                                               | -0.4904 | 0.0023 |
| 208953_at   | LARP5         | La ribonucleoprotein domain family; member 5                                                                 | -0.688  | 0.0361 |
| 208958_at   | TXNDC4        | thioredoxin domain containing 4 (endoplasmic reticulum)                                                      | -0.7468 | 0.0255 |
| 208962_s_at | FADS1         | fatty acid desaturase 1                                                                                      | -1.8056 | 0.0091 |
| 208963_x_at | FADS1         | fatty acid desaturase 1                                                                                      | -1.7026 | 0.0142 |
| 208964_s_at | FADS1         | fatty acid desaturase 1                                                                                      | -1.4101 | 0.0415 |
| 208990_s_at | HNRPH3        | heterogeneous nuclear ribonucleoprotein H3 (2H9)                                                             | -0.3372 | 0.0219 |
| 209081_s_at | COL18A1       | collagen; type XVIII; alpha 1                                                                                | -1.9915 | 0.0038 |
| 209082_s_at | COL18A1       | collagen; type XVIII; alpha 1                                                                                | -1.448  | 0.0115 |
| 209236_at   | SLC23A2       | solute carrier family 23 (nucleobase transporters); member 2                                                 | -1.2616 | 0.0186 |
| 209250_at   | DEGS1         | degenerative spermatocyte homolog 1; lipid desaturase (Drosophila)                                           | -0.6275 | 0.0209 |
| 209390_at   | TSC1          | tuberous sclerosis 1                                                                                         | -0.812  | 0.0027 |
| 209430_at   | BTA1F1        | BTA1F1 RNA polymerase II; B-TFIID transcription factor-associated; 170kDa (Mot1 homolog; S. cerevisiae)      | -0.5367 | 0.0242 |
| 209439_s_at | PHKA2         | phosphorylase kinase; alpha 2 (liver)                                                                        | -1.3286 | 0.0229 |
| 209487_at   | RBPMS         | RNA binding protein with multiple splicing                                                                   | -1.3425 | 0.0316 |
| 209512_at   | HSDL2         | hydroxysteroid dehydrogenase like 2                                                                          | -1.0057 | 0.0183 |
| 209513_s_at | HSDL2         | hydroxysteroid dehydrogenase like 2                                                                          | -0.9124 | 0.0006 |
| 209518_at   | SMARCD1       | SWI/SNF related; matrix associated; actin dependent regulator of chromatin; subfamily d; member 1            | -0.3647 | 0.0331 |
| 209522_s_at | CRAT          | carnitine acetyltransferase                                                                                  | -0.8125 | 0.0046 |
| 209547_s_at | SF4           | splicing factor 4                                                                                            | -0.2798 | 0.0287 |
| 209630_s_at | FBXW2         | F-box and WD repeat domain containing 2                                                                      | -0.6468 | 0.002  |
| 209651_at   | TGFB111       | transforming growth factor beta 1 induced transcript 1                                                       | -2.1427 | 0.0028 |

|             |          |                                                                                                                |         |        |
|-------------|----------|----------------------------------------------------------------------------------------------------------------|---------|--------|
| 209705_at   | MTF2     | metal response element binding transcription factor 2                                                          | -0.7278 | 0.0168 |
| 209750_at   | NR1D2    | nuclear receptor subfamily 1; group D; member 2                                                                | -1.245  | 0.0396 |
| 209824_s_at | ARNTL    | aryl hydrocarbon receptor nuclear translocator-like                                                            | -1.1331 | 0.0241 |
| 209866_s_at | LPHN3    | latrophilin 3                                                                                                  | -2.5079 | 0.024  |
| 209867_s_at | LPHN3    | latrophilin 3                                                                                                  | -2.0789 | 0.0361 |
| 209908_s_at | TGFB2    | transforming growth factor; beta 2                                                                             | -0.2229 | 0.0137 |
| 209909_s_at | TGFB2    | transforming growth factor; beta 2                                                                             | -1.1801 | 0.0306 |
| 209939_x_at | CFLAR    | CASP8 and FADD-like apoptosis regulator                                                                        | -0.6242 | 0.0401 |
| 209959_at   | NR4A3    | nuclear receptor subfamily 4; group A; member 3                                                                | -2.2948 | 0.025  |
| 209974_s_at | BUB3     | BUB3 budding uninhibited by benzimidazoles 3 homolog (yeast)                                                   | -0.4837 | 0.0172 |
| 209982_s_at | NRXN2    | neurexin 2                                                                                                     | -1.4217 | 0.0185 |
| 209983_s_at | NRXN2    | neurexin 2                                                                                                     | -0.6012 | 0.0229 |
| 209993_at   | ABCB1    | ATP-binding cassette; sub-family B (MDR/TAP); member 1                                                         | -1.7299 | 0.027  |
| 209994_s_at | ABCB1    | ATP-binding cassette; sub-family B (MDR/TAP); member 1, ATP-binding cassette; sub-family B (MDR/TAP); member 4 | -1.9161 | 0.0124 |
| 210094_s_at | PARD3    | par-3 partitioning defective 3 homolog (C. elegans)                                                            | -0.9677 | 0.0056 |
| 210132_at   | EFNA3    | ephrin-A3                                                                                                      | -1.2565 | 0.0307 |
| 210210_at   | MPZL1    | myelin protein zero-like 1                                                                                     | -0.4404 | 0.0191 |
| 210214_s_at | BMPR2    | bone morphogenetic protein receptor; type II (serine/threonine kinase)                                         | -0.5144 | 0.049  |
| 210231_x_at | SET      | SET translocation (myeloid leukemia-associated)                                                                | -0.5388 | 0.0063 |
| 210261_at   | KCNK2    | potassium channel; subfamily K; member 2                                                                       | -1.6229 | 0.0274 |
| 210276_s_at | TRIOBP   | TRIO and F-actin binding protein                                                                               | -1.0911 | 0.0122 |
| 210281_s_at | ZMYM2    | zinc finger; MYM-type 2                                                                                        | -0.9597 | 0.0301 |
| 210282_at   | ZMYM2    | zinc finger; MYM-type 2                                                                                        | -0.9929 | 0.0239 |
| 210299_s_at | FHL1     | four and a half LIM domains 1                                                                                  | -0.9377 | 0.0322 |
| 210303_at   | MAB21L2  | mab-21-like 2 (C. elegans)                                                                                     | -0.1648 | 0.0289 |
| 210333_at   | NR5A1    | nuclear receptor subfamily 5; group A; member 1                                                                | -0.9089 | 0.0361 |
| 210426_x_at | RORA     | RAR-related orphan receptor A                                                                                  | -1.8853 | 0.0058 |
| 210436_at   | CCT8     | chaperonin containing TCP1; subunit 8 (theta)                                                                  | -0.1157 | 0.0498 |
| 210479_s_at | RORA     | RAR-related orphan receptor A                                                                                  | -2.0771 | 0.0056 |
| 210539_at   | TTLL5    | tubulin tyrosine ligase-like family; member 5                                                                  | -0.2411 | 0.0027 |
| 210588_x_at | HNRPH3   | heterogeneous nuclear ribonucleoprotein H3 (2H9)                                                               | -0.3771 | 0.0469 |
| 210618_at   | RAP1GAP  | RAP1 GTPase activating protein                                                                                 | -0.163  | 0.0223 |
| 210623_at   | LOC51035 | SAPK substrate protein 1                                                                                       | -0.2952 | 0.0027 |
| 210678_s_at | AGPAT2   | 1-acylglycerol-3-phosphate O-acyltransferase 2 (lysophosphatidic acid acyltransferase; beta)                   | -0.331  | 0.0483 |
| 210679_x_at |          |                                                                                                                | -0.5268 | 0.0372 |
| 210757_x_at | DAB2     | disabled homolog 2; mitogen-responsive phosphoprotein (Drosophila)                                             | -1.4972 | 0.0141 |
| 210762_s_at | DLC1     | deleted in liver cancer 1                                                                                      | -1.7001 | 0.0186 |
| 210933_s_at | FSCN1    | fascin homolog 1; actin-bundling protein (Strongylocentrotus purpuratus)                                       | -1.1098 | 0.024  |
| 210946_at   | PPAP2A   | phosphatidic acid phosphatase type 2A                                                                          | -0.5662 | 0.0496 |
| 210954_s_at | TSC22D2  | TSC22 domain family; member 2                                                                                  | -0.3157 | 0.0294 |
| 210964_s_at | GYG2     | glycogenin 2                                                                                                   | -0.2243 | 0.0457 |
| 210969_at   | PKN2     | protein kinase N2                                                                                              | -0.2482 | 0.0453 |
| 210971_s_at | ARNTL    | aryl hydrocarbon receptor nuclear translocator-like                                                            | -0.8226 | 0.0408 |
| 211073_x_at | RPL3     | ribosomal protein L3                                                                                           | -0.278  | 0.0046 |
| 211083_s_at | MAP3K13  | mitogen-activated protein kinase kinase kinase 13                                                              | -0.3435 | 0.0236 |
| 211126_s_at | CSRP2    | cysteine and glycine-rich protein 2                                                                            | -1.354  | 0.0423 |
| 211148_s_at | ANGPT2   | angiopoietin 2                                                                                                 | -1.2618 | 0.0311 |
| 211202_s_at | JARID1B  | jumonji; AT rich interactive domain 1B                                                                         | -0.9138 | 0.0435 |
| 211277_x_at | APP      | amyloid beta (A4) precursor protein (peptidase nexin-II; Alzheimer disease)                                    | -0.4452 | 0.0408 |
| 211304_x_at | KCNJ5    | potassium inwardly-rectifying channel; subfamily J; member 5                                                   | -0.2226 | 0.0297 |
| 211373_s_at | PSEN2    | presenilin 2 (Alzheimer disease 4)                                                                             | -0.7771 | 0.038  |
| 211411_at   |          | LDLR-FUT fusion protein (LDLR-FUT)                                                                             | -0.1504 | 0.0443 |



|             |          |                                                                                                                                       |         |        |
|-------------|----------|---------------------------------------------------------------------------------------------------------------------------------------|---------|--------|
| 211509_s_at | RTN4     | reticulon 4                                                                                                                           | -0.1908 | 0.0175 |
| 211556_at   | MAPRE2   | microtubule-associated protein; RP/EB family; member 2                                                                                | -0.1157 | 0.0143 |
| 211651_s_at | LAMB1    | laminin; beta 1                                                                                                                       | -1.619  | 0.0182 |
| 211929_at   | HNRPA3   | heterogeneous nuclear ribonucleoprotein A3                                                                                            | -0.5318 | 0.0263 |
| 211930_at   | HNRPA3   | heterogeneous nuclear ribonucleoprotein A3                                                                                            | -0.5828 | 0.0164 |
| 211940_x_at | H3F3A    | H3 histone; family 3A, H3 histone; family 3A pseudogene, similar to H3 histone; family 3B                                             | -0.2573 | 0.0415 |
| 211958_at   | IGFBP5   | insulin-like growth factor binding protein 5                                                                                          | -1.0127 | 0.0129 |
| 211959_at   | IGFBP5   | insulin-like growth factor binding protein 5                                                                                          | -2.3125 | 0.0046 |
| 211975_at   | ZNF289   | zinc finger protein 289; ID1 regulated                                                                                                | -0.9671 | 0.0086 |
| 212039_x_at | RPL3     | ribosomal protein L3                                                                                                                  | -0.2704 | 0.0109 |
| 212065_s_at | USP34    | ubiquitin specific peptidase 34                                                                                                       | -1.2883 | 0.0223 |
| 212066_s_at | USP34    | ubiquitin specific peptidase 34                                                                                                       | -0.8566 | 0.0209 |
| 212068_s_at | KIAA0515 | KIAA0515                                                                                                                              | -0.8274 | 0.0155 |
| 212069_s_at | KIAA0515 | KIAA0515                                                                                                                              | -0.9198 | 0.0029 |
| 212089_at   | LMNA     | lamin A/C                                                                                                                             | -0.6881 | 0.033  |
| 212094_at   | PEG10    | paternally expressed 10                                                                                                               | -1.8198 | 0.0227 |
| 212099_at   | RHOB     | ras homolog gene family; member B                                                                                                     | -0.6711 | 0.0107 |
| 212104_s_at | RBM9     | RNA binding motif protein 9                                                                                                           | -0.9903 | 0.0201 |
| 212115_at   | HN1L     | hematological and neurological expressed 1-like                                                                                       | -0.722  | 0.0031 |
| 212131_at   | LSM14A   | LSM14A; SCD6 homolog A (S. cerevisiae)                                                                                                | -0.7176 | 0.0033 |
| 212148_at   | PBX1     | pre-B-cell leukemia homeobox 1                                                                                                        | -1.1798 | 0.0164 |
| 212151_at   | PBX1     | pre-B-cell leukemia homeobox 1                                                                                                        | -1.3568 | 0.0106 |
| 212152_x_at | ARID1A   | AT rich interactive domain 1A (SWI-like)                                                                                              | -0.521  | 0.0046 |
| 212153_at   | POGZ     | pogo transposable element with ZNF domain                                                                                             | -0.8866 | 0.0181 |
| 212182_at   | NUDT4    | nudix (nucleoside diphosphate linked moiety X)-type motif 4, nudix (nucleoside diphosphate linked moiety X)-type motif 4 pseudogene 1 | -0.2213 | 0.0428 |
| 212186_at   | ACACA    | acetyl-Coenzyme A carboxylase alpha                                                                                                   | -0.7104 | 0.022  |
| 212215_at   | PREPL    | prolyl endopeptidase-like                                                                                                             | -0.3759 | 0.0075 |
| 212218_s_at | FASN     | fatty acid synthase                                                                                                                   | -1.6039 | 0.0417 |
| 212232_at   | FNBP4    | formin binding protein 4                                                                                                              | -0.663  | 0.0476 |
| 212270_x_at | C18orf32 | chromosome 18 open reading frame 32, hCG22804, hCG39912, ribosomal protein L17                                                        | -0.2517 | 0.0243 |
| 212276_at   | LPIN1    | lipin 1                                                                                                                               | -0.7801 | 0.0408 |
| 212279_at   | TMEM97   | transmembrane protein 97                                                                                                              | -1.3357 | 0.0169 |
| 212281_s_at | TMEM97   | transmembrane protein 97                                                                                                              | -1.4403 | 0.0234 |
| 212282_at   | TMEM97   | transmembrane protein 97                                                                                                              | -1.3557 | 0.0311 |
| 212289_at   | ANKRD12  | ankyrin repeat domain 12                                                                                                              | -0.6838 | 0.0184 |
| 212298_at   | NRP1     | neuropilin 1                                                                                                                          | -0.913  | 0.0234 |
| 212336_at   | EPB41L1  | erythrocyte membrane protein band 4.1-like 1                                                                                          | -1.4037 | 0.0107 |
| 212339_at   | EPB41L1  | erythrocyte membrane protein band 4.1-like 1                                                                                          | -1.1551 | 0.0381 |
| 212359_s_at | KIAA0913 | KIAA0913                                                                                                                              | -0.5344 | 0.0343 |
| 212366_at   | ZNF292   | zinc finger protein 292                                                                                                               | -0.6718 | 0.0231 |
| 212368_at   | ZNF292   | zinc finger protein 292                                                                                                               | -1.0112 | 0.0009 |
| 212428_at   | KIAA0368 | KIAA0368                                                                                                                              | -0.6341 | 0.0262 |
| 212468_at   | SPAG9    | sperm associated antigen 9                                                                                                            | -0.709  | 0.0447 |
| 212492_s_at | JMJD2B   | jumonji domain containing 2B                                                                                                          | -1.6151 | 0.0006 |
| 212495_at   | JMJD2B   | jumonji domain containing 2B                                                                                                          | -1.1404 | 0.0085 |
| 212496_s_at | JMJD2B   | jumonji domain containing 2B                                                                                                          | -1.1675 | 0.0046 |
| 212509_s_at | MXRA7    | matrix-remodelling associated 7                                                                                                       | -0.4236 | 0.0242 |
| 212517_at   | ATRN     | attractin                                                                                                                             | -0.6278 | 0.0314 |
| 212520_s_at | SMARCA4  | SWI/SNF related; matrix associated; actin dependent regulator of chromatin; subfamily a; member 4                                     | -0.9486 | 0.0046 |
| 212534_at   |          | CDNA FLJ11904 fis; clone HEMBB1000048                                                                                                 | -0.5747 | 0.0028 |
| 212537_x_at | C18orf32 | chromosome 18 open reading frame 32, hCG22804, hCG39912, ribosomal protein L17                                                        | -0.2406 | 0.0305 |
| 212547_at   | FLJ35348 | FLJ35348                                                                                                                              | -1.1133 | 0.0027 |
| 212557_at   | ZNF451   | zinc finger protein 451                                                                                                               | -0.4656 | 0.0134 |
| 212622_at   | TMEM41B  | transmembrane protein 41B                                                                                                             | -0.6185 | 0.0488 |
| 212650_at   | EHBP1    | EH domain binding protein 1                                                                                                           | -1.0451 | 0.014  |
| 212653_s_at | EHBP1    | EH domain binding protein 1                                                                                                           | -0.7969 | 0.0459 |

|             |           |                                                                                                                                                                                                                                                           |         |        |
|-------------|-----------|-----------------------------------------------------------------------------------------------------------------------------------------------------------------------------------------------------------------------------------------------------------|---------|--------|
| 212664_at   | TUBB4     | tubulin; beta 4                                                                                                                                                                                                                                           | -2.0245 | 0.0108 |
| 212667_at   | SPARC     | secreted protein; acidic; cysteine-rich (osteonectin)                                                                                                                                                                                                     | -1.0505 | 0.0189 |
| 212689_s_at | JMJD1A    | jumonji domain containing 1A                                                                                                                                                                                                                              | -0.9052 | 0.0063 |
| 212690_at   | DDHD2     | DDHD domain containing 2                                                                                                                                                                                                                                  | -0.6705 | 0.0468 |
| 212719_at   | PHLPP     | PH domain and leucine rich repeat protein phosphatase                                                                                                                                                                                                     | -1.0394 | 0.0418 |
| 212752_at   | CLASP1    | cytoplasmic linker associated protein 1                                                                                                                                                                                                                   | -0.582  | 0.0249 |
| 212759_s_at | TCF7L2    | transcription factor 7-like 2 (T-cell specific; HMG-box)                                                                                                                                                                                                  | -0.7207 | 0.0168 |
| 212761_at   | TCF7L2    | transcription factor 7-like 2 (T-cell specific; HMG-box)                                                                                                                                                                                                  | -0.5234 | 0.0425 |
| 212762_s_at | TCF7L2    | transcription factor 7-like 2 (T-cell specific; HMG-box)                                                                                                                                                                                                  | -1.1495 | 0.0013 |
| 212775_at   | OBSL1     | obscurin-like 1                                                                                                                                                                                                                                           | -1.7507 | 0.0134 |
| 212776_s_at | OBSL1     | obscurin-like 1                                                                                                                                                                                                                                           | -1.8207 | 0.0311 |
| 212793_at   | DAAM2     | dishevelled associated activator of morphogenesis 2                                                                                                                                                                                                       | -2.8034 | 0.0085 |
| 212802_s_at | GAPVD1    | GTPase activating protein and VPS9 domains 1                                                                                                                                                                                                              | -0.6756 | 0.0034 |
| 212840_at   | UBXD7     | UBX domain containing 7                                                                                                                                                                                                                                   | -1.0414 | 0.002  |
| 212852_s_at | TROVE2    | TROVE domain family; member 2                                                                                                                                                                                                                             | -0.5414 | 0.0289 |
| 212854_x_at | NBPF10    | neuroblastoma breakpoint family; member 10                                                                                                                                                                                                                | -0.6083 | 0.0131 |
| 212875_s_at | C21orf25  | chromosome 21 open reading frame 25                                                                                                                                                                                                                       | -1.6912 | 0.0015 |
| 212928_at   | TSPYL4    | TSPY-like 4                                                                                                                                                                                                                                               | -0.6971 | 0.0101 |
| 212950_at   | GPR116    | G protein-coupled receptor 116                                                                                                                                                                                                                            | -1.0172 | 0.0356 |
| 212977_at   | CXCR7     | chemokine (C-X-C motif) receptor 7                                                                                                                                                                                                                        | -2.4608 | 0.0243 |
| 212980_at   | USP34     | ubiquitin specific peptidase 34                                                                                                                                                                                                                           | -0.912  | 0.0401 |
| 213015_at   |           | ARTC1 mRNA; complete sequence                                                                                                                                                                                                                             | -1.0087 | 0.0398 |
| 213016_at   |           | ARTC1 mRNA; complete sequence                                                                                                                                                                                                                             | -0.8003 | 0.0465 |
| 213048_s_at |           |                                                                                                                                                                                                                                                           | -0.5717 | 0.0029 |
| 213052_at   | PRKAR2A   | Protein kinase; cAMP-dependent; regulatory; type II; alpha                                                                                                                                                                                                | -0.5098 | 0.0286 |
| 213154_s_at | BICD2     | bicaudal D homolog 2 (Drosophila)                                                                                                                                                                                                                         | -0.4045 | 0.0413 |
| 213156_at   |           | Homo sapiens; clone IMAGE:4214654; mRNA                                                                                                                                                                                                                   | -1.0474 | 0.0428 |
| 213158_at   |           | Homo sapiens; clone IMAGE:4214654; mRNA                                                                                                                                                                                                                   | -1.0934 | 0.0328 |
| 213161_at   | C9orf97   | chromosome 9 open reading frame 97                                                                                                                                                                                                                        | -0.6061 | 0.0255 |
| 213197_at   | ASTN1     | astrotactin 1                                                                                                                                                                                                                                             | -2.3391 | 0.0153 |
| 213248_at   | LOC730101 | similar to heterogeneous nuclear ribonucleoprotein A/B                                                                                                                                                                                                    | -1.628  | 0.0205 |
| 213254_at   | TNRC6B    | trinucleotide repeat containing 6B                                                                                                                                                                                                                        | -0.3058 | 0.039  |
| 213310_at   | EIF2C2    | Eukaryotic translation initiation factor 2C; 2                                                                                                                                                                                                            | -0.951  | 0.0437 |
| 213345_at   | NFATC4    | nuclear factor of activated T-cells; cytoplasmic; calcineurin-dependent 4                                                                                                                                                                                 | -0.6861 | 0.026  |
| 213381_at   | C10orf72  | Chromosome 10 open reading frame 72                                                                                                                                                                                                                       | -1.8045 | 0.0041 |
| 213387_at   | ATAD2B    | ATPase family; AAA domain containing 2B                                                                                                                                                                                                                   | -0.998  | 0.0344 |
| 213451_x_at | TNXB      | tenascin XB                                                                                                                                                                                                                                               | -2.0983 | 0.0025 |
| 213459_at   | RPL37A    | ribosomal protein L37a                                                                                                                                                                                                                                    | -1.5333 | 0.0225 |
| 213462_at   | NPAS2     | neuronal PAS domain protein 2                                                                                                                                                                                                                             | -1.3926 | 0.0381 |
| 213478_at   | KIAA1026  | kazrin                                                                                                                                                                                                                                                    | -2.6897 | 0.0011 |
| 213488_at   | SNED1     | sushi; nidogen and EGF-like domains 1                                                                                                                                                                                                                     | -1.626  | 0.0094 |
| 213489_at   | MAPRE2    | Microtubule-associated protein; RP/EB family; member 2                                                                                                                                                                                                    | -0.9185 | 0.0216 |
| 213531_s_at | RAB3GAP1  | RAB3 GTPase activating protein subunit 1 (catalytic)                                                                                                                                                                                                      | -0.4887 | 0.0451 |
| 213570_at   | EIF4E2    | eukaryotic translation initiation factor 4E family member 2                                                                                                                                                                                               | -0.6422 | 0.026  |
| 213575_at   | TRA2A     | transformer-2 alpha                                                                                                                                                                                                                                       | -0.7745 | 0.0259 |
| 213577_at   | SQLE      | squalene epoxidase                                                                                                                                                                                                                                        | -1.8157 | 0.0404 |
| 213593_s_at | TRA2A     | transformer-2 alpha                                                                                                                                                                                                                                       | -1.3731 | 0.0021 |
| 213612_x_at | LOC728980 | hypothetical protein LOC728980, neuroblastoma breakpoint family; member 10, neuroblastoma breakpoint family; member 15, neuroblastoma breakpoint family; member 16, neuroblastoma breakpoint family; member 20, neuroblastoma breakpoint family; member 8 | -0.3922 | 0.0125 |
| 213619_at   | HNRPH1    | Heterogeneous nuclear ribonucleoprotein H1 (H)                                                                                                                                                                                                            | -0.3197 | 0.026  |
| 213649_at   | SFRS7     | splicing factor; arginine/serine-rich 7; 35kDa                                                                                                                                                                                                            | -0.867  | 0.0427 |
| 213686_at   | VPS13A    | vacuolar protein sorting 13 homolog A (S. cerevisiae)                                                                                                                                                                                                     | -1.3523 | 0.0189 |
| 213720_s_at | SMARCA4   | SWI/SNF related; matrix associated; actin dependent regulator of chromatin; subfamily a; member 4                                                                                                                                                         | -0.9531 | 0.0059 |
| 213744_at   | ATRNL1    | attractin-like 1                                                                                                                                                                                                                                          | -1.0501 | 0.009  |
| 213745_at   | ATRNL1    | attractin-like 1                                                                                                                                                                                                                                          | -1.636  | 0.0095 |

|             |                 |                                                                                                                                                                                                           |         |        |
|-------------|-----------------|-----------------------------------------------------------------------------------------------------------------------------------------------------------------------------------------------------------|---------|--------|
| 213771_at   | IRF2BP1         | interferon regulatory factor 2 binding protein 1                                                                                                                                                          | -0.4169 | 0.043  |
| 213785_at   | IPO9            | importin 9                                                                                                                                                                                                | -0.6728 | 0.0239 |
| 213792_s_at | INSR            | insulin receptor                                                                                                                                                                                          | -0.9952 | 0.0497 |
| 213852_at   | RBM8A           | RNA binding motif protein 8A                                                                                                                                                                              | -0.6191 | 0.0365 |
| 213904_at   |                 | Clone 23555 mRNA sequence                                                                                                                                                                                 | -2.7925 | 0.001  |
| 213931_at   | ID2             | inhibitor of DNA binding 2; dominant negative helix-loop-helix protein, inhibitor of DNA binding 2B; dominant negative helix-loop-helix protein                                                           | -1.742  | 0.0281 |
| 213936_x_at | SFTPB           | surfactant; pulmonary-associated protein B                                                                                                                                                                | -0.2489 | 0.0193 |
| 213941_x_at | RPS7            | ribosomal protein S7                                                                                                                                                                                      | -0.241  | 0.0388 |
| 213956_at   | CEP350          | centrosomal protein 350kDa                                                                                                                                                                                | -0.7107 | 0.0288 |
| 213967_at   | RALYL           | RALY RNA binding protein-like                                                                                                                                                                             | -2.3168 | 0.0446 |
| 213977_s_at | CIZ1            | CDKN1A interacting zinc finger protein 1                                                                                                                                                                  | -0.7644 | 0.0301 |
| 214016_s_at | SFPQ            | splicing factor proline/glutamine-rich (polypyrimidine tract binding protein associated)                                                                                                                  | -0.6142 | 0.0475 |
| 214077_x_at | MEIS3P1         | Meis homeobox 3 pseudogene 1                                                                                                                                                                              | -1.3715 | 0.0031 |
| 214102_at   | CENTD1          | centaurin; delta 1                                                                                                                                                                                        | -0.9572 | 0.0356 |
| 214153_at   | ELOVL5          | ELOVL family member 5; elongation of long chain fatty acids (FEN1/Elo2; SUR4/Elo3-like; yeast)                                                                                                            | -0.6428 | 0.0103 |
| 214198_s_at | DGCR2           | DiGeorge syndrome critical region gene 2                                                                                                                                                                  | -0.4448 | 0.0219 |
| 214283_at   | TMEM97          | transmembrane protein 97                                                                                                                                                                                  | -1.9491 | 0.0248 |
| 214291_at   | hCG_200459<br>3 | hCG2004593, hCG39912, hypothetical LOC643863, ribosomal protein L17, similar to 60S ribosomal protein L17 (L23), similar to 60S ribosomal protein L17 (L23) (Amino acid starvation-induced protein) (ASI) | -1.1955 | 0.0152 |
| 214305_s_at | SF3B1           | splicing factor 3b; subunit 1; 155kDa                                                                                                                                                                     | -0.7655 | 0.0464 |
| 214319_at   | FRY             | furry homolog (Drosophila)                                                                                                                                                                                | -0.3842 | 0.0256 |
| 214341_at   | THTPA           | Thiamine triphosphatase                                                                                                                                                                                   | -0.1543 | 0.0216 |
| 214356_s_at | KIAA0368        | KIAA0368                                                                                                                                                                                                  | -0.6287 | 0.0163 |
| 214375_at   | LOC729222       | PTPRF interacting protein; binding protein 1 (liprin beta 1), similar to PTPRF interacting protein binding protein 1 isoform 1                                                                            | -1.5384 | 0.0263 |
| 214388_at   |                 | BRCA2 region; mRNA sequence CG011                                                                                                                                                                         | -0.1027 | 0.0333 |
| 214422_at   | LOC131185       | RAD23 homolog B (S. cerevisiae), similar to UV excision repair protein RAD23 homolog B (hHR23B) (XP-C repair-complementing complex 58 kDa protein) (p58)                                                  | -0.6339 | 0.0202 |
| 214428_x_at | C4A             | complement component 4A (Rodgers blood group), complement component 4B (Childo blood group)                                                                                                               | -1.3491 | 0.0252 |
| 214477_at   | MLLT1           | myeloid/lymphoid or mixed-lineage leukemia (trithorax homolog; Drosophila); translocated to; 1                                                                                                            | -0.1103 | 0.0234 |
| 214593_at   | PIAS2           | protein inhibitor of activated STAT; 2                                                                                                                                                                    | -0.2393 | 0.013  |
| 214594_x_at | ATP8B1          | ATPase; Class I; type 8B; member 1                                                                                                                                                                        | -0.4789 | 0.049  |
| 214626_s_at | GANAB           | glucosidase; alpha; neutral AB                                                                                                                                                                            | -0.4816 | 0.0246 |
| 214660_at   | PELO            | Pelota homolog (Drosophila)                                                                                                                                                                               | -1.8706 | 0.0088 |
| 214663_at   | RIPK5           | receptor interacting protein kinase 5                                                                                                                                                                     | -0.8117 | 0.0279 |
| 214683_s_at | CLK1            | CDC-like kinase 1                                                                                                                                                                                         | -0.5886 | 0.0169 |
| 214698_at   | ROD1            | ROD1 regulator of differentiation 1 (S. pombe)                                                                                                                                                            | -0.235  | 0.0275 |
| 214704_at   | TCF25           | transcription factor 25 (basic helix-loop-helix)                                                                                                                                                          | -0.2187 | 0.0333 |
| 214707_x_at | ALMS1           | Alstrom syndrome 1                                                                                                                                                                                        | -0.4521 | 0.0181 |
| 214728_x_at | SMARCA4         | SWI/SNF related; matrix associated; actin dependent regulator of chromatin; subfamily a; member 4                                                                                                         | -0.8651 | 0.0119 |
| 214734_at   | EXPH5           | exophilin 5                                                                                                                                                                                               | -0.5319 | 0.0403 |
| 214785_at   | VPS13A          | vacuolar protein sorting 13 homolog A (S. cerevisiae)                                                                                                                                                     | -1.077  | 0.002  |
| 214797_s_at | PCTK3           | PCTAIRE protein kinase 3                                                                                                                                                                                  | -0.5663 | 0.038  |
| 214843_s_at | USP33           | ubiquitin specific peptidase 33                                                                                                                                                                           | -0.5201 | 0.0397 |
| 214852_x_at | VPS13A          | vacuolar protein sorting 13 homolog A (S. cerevisiae)                                                                                                                                                     | -0.2908 | 0.0105 |
| 214861_at   | JMJD2C          | jumonji domain containing 2C                                                                                                                                                                              | -0.8724 | 0.0048 |
| 214917_at   | PRKAA1          | protein kinase; AMP-activated; alpha 1 catalytic subunit                                                                                                                                                  | -0.8767 | 0.0451 |
| 214918_at   | HNRPM           | heterogeneous nuclear ribonucleoprotein M                                                                                                                                                                 | -0.5536 | 0.019  |
| 214948_s_at | TMF1            | TATA element modulatory factor 1                                                                                                                                                                          | -1.1372 | 0.0179 |
| 214949_at   |                 | CDNA FLJ31919 fis; clone NT2RP7004964                                                                                                                                                                     | -0.9717 | 0.0232 |
| 214956_at   | AAK1            | AP2 associated kinase 1                                                                                                                                                                                   | -0.3184 | 0.0023 |

|             |           |                                                                                                                                                                                                       |         |        |
|-------------|-----------|-------------------------------------------------------------------------------------------------------------------------------------------------------------------------------------------------------|---------|--------|
| 214978_s_at | PPFIA4    | protein tyrosine phosphatase; receptor type; f polypeptide (PTPRF); interacting protein (liprin); alpha 4                                                                                             | -0.7804 | 0.0464 |
| 214985_at   |           | Clone 24739 mRNA sequence                                                                                                                                                                             | -0.2439 | 0.0302 |
| 215012_at   | ZNF451    | zinc finger protein 451                                                                                                                                                                               | -1.5103 | 0.0065 |
| 215018_at   | KIAA1731  | KIAA1731                                                                                                                                                                                              | -0.2041 | 0.0309 |
| 215046_at   | FLJ23861  | hypothetical protein FLJ23861                                                                                                                                                                         | -0.7587 | 0.039  |
| 215063_x_at | LRRC40    | leucine rich repeat containing 40                                                                                                                                                                     | -0.1974 | 0.0373 |
| 215066_at   | PTPRF     | protein tyrosine phosphatase; receptor type; F                                                                                                                                                        | -0.3393 | 0.015  |
| 215067_x_at | PRDX2     | peroxiredoxin 2                                                                                                                                                                                       | -0.5877 | 0.0381 |
| 215069_at   | NMT2      | N-myristoyltransferase 2                                                                                                                                                                              | -0.2714 | 0.0228 |
| 215070_x_at | RABGAP1   | RAB GTPase activating protein 1                                                                                                                                                                       | -0.3807 | 0.0239 |
| 215116_s_at | DNM1      | dynamitin 1                                                                                                                                                                                           | -1.3395 | 0.0239 |
| 215138_s_at | KIAA1026  | kazrin                                                                                                                                                                                                | -0.8634 | 0.0172 |
| 215143_at   | DPY19L2P2 | dpy-19-like 2 pseudogene 2 (C. elegans)                                                                                                                                                               | -1.6074 | 0.0166 |
| 215162_at   | GARNL1    | GTPase activating Rap/RanGAP domain-like 1                                                                                                                                                            | -0.3622 | 0.0204 |
| 215164_at   |           | MRNA; cDNA DKFZp564I083 (from clone DKFZp564I083)                                                                                                                                                     | -0.8313 | 0.0351 |
| 215179_x_at | PGF       | Placental growth factor; vascular endothelial growth factor-related protein                                                                                                                           | -0.3244 | 0.0476 |
| 215190_at   | EIF3M     | eukaryotic translation initiation factor 3; subunit M                                                                                                                                                 | -0.9012 | 0.01   |
| 215204_at   |           | CDNA FLJ14090 fis; clone MAMMA1000264                                                                                                                                                                 | -0.8779 | 0.0114 |
| 215206_at   |           | CDNA: FLJ21490 fis; clone COL05464                                                                                                                                                                    | -0.8931 | 0.0136 |
| 215284_at   |           | Clone 24407 mRNA sequence                                                                                                                                                                             | -0.2858 | 0.0123 |
| 215296_at   | CDC42BPA  | CDC42 binding protein kinase alpha (DMPK-like)                                                                                                                                                        | -0.6502 | 0.0339 |
| 215308_at   | XRCC6     | X-ray repair complementing defective repair in Chinese hamster cells 6 (Ku autoantigen; 70kDa)                                                                                                        | -0.232  | 0.0194 |
| 215321_at   | RPIB9     | Rap2-binding protein 9                                                                                                                                                                                | -1.6499 | 0.0054 |
| 215350_at   | SYNE1     | spectrin repeat containing; nuclear envelope 1                                                                                                                                                        | -0.4478 | 0.0438 |
| 215372_x_at |           | CDNA FLJ12002 fis; clone HEMBB1001536                                                                                                                                                                 | -0.3068 | 0.0403 |
| 215373_x_at | FLJ12151  | hypothetical protein FLJ12151                                                                                                                                                                         | -0.4219 | 0.033  |
| 215377_at   | CTBP2     | C-terminal binding protein 2                                                                                                                                                                          | -0.2263 | 0.0269 |
| 215383_x_at | SPG21     | spastic paraplegia 21 (autosomal recessive; Mast syndrome)                                                                                                                                            | -0.2196 | 0.0225 |
| 215385_at   |           | CDNA FLJ12411 fis; clone MAMMA1002964                                                                                                                                                                 | -1.3293 | 0.004  |
| 215398_at   |           | Clone 23821 mRNA sequence                                                                                                                                                                             | -0.6386 | 0.0315 |
| 215404_x_at | FGFR1     | fibroblast growth factor receptor 1 (fms-related tyrosine kinase 2; Pfeiffer syndrome)                                                                                                                | -0.4271 | 0.006  |
| 215435_at   |           | CDNA FLJ11921 fis; clone HEMBB1000318                                                                                                                                                                 | -1.1151 | 0.0161 |
| 215436_at   | HSDL2     | Hydroxysteroid dehydrogenase like 2                                                                                                                                                                   | -0.9141 | 0.0009 |
| 215457_at   |           | Clone 24438 mRNA sequence                                                                                                                                                                             | -0.3453 | 0.0035 |
| 215528_at   |           | MRNA; cDNA DKFZp586O1318 (from clone DKFZp586O1318)                                                                                                                                                   | -0.7773 | 0.0105 |
| 215556_at   |           | CDNA FLJ13712 fis; clone PLACE2000394                                                                                                                                                                 | -0.1756 | 0.0109 |
| 215558_at   | UBR2      | Ubiquitin protein ligase E3 component n-recognin 2                                                                                                                                                    | -0.4181 | 0.0128 |
| 215573_at   | CAT       | Catalase                                                                                                                                                                                              | -0.3607 | 0.019  |
| 215586_at   |           | CDNA FLJ14111 fis; clone MAMMA1001630                                                                                                                                                                 | -0.5741 | 0.0491 |
| 215588_x_at | RIOK3     | RIO kinase 3 (yeast)                                                                                                                                                                                  | -0.7    | 0.0169 |
| 215595_x_at |           | CDNA FLJ13856 fis; clone THYRO1000988                                                                                                                                                                 | -0.1977 | 0.0212 |
| 215597_x_at |           | CDNA FLJ11353 fis; clone HEMBA1000042                                                                                                                                                                 | -0.254  | 0.0352 |
| 215604_x_at |           | CDNA FLJ13721 fis; clone PLACE2000450                                                                                                                                                                 | -0.3649 | 0.0303 |
| 215605_at   | NCOA2     | Nuclear receptor coactivator 2                                                                                                                                                                        | -0.7096 | 0.0368 |
| 215616_s_at | JMJD2B    | jumonji domain containing 2B                                                                                                                                                                          | -0.5513 | 0.0017 |
| 215620_at   | RREB1     | ras responsive element binding protein 1                                                                                                                                                              | -0.3384 | 0.015  |
| 215628_x_at |           | MRNA; cDNA DKFZp564M193 (from clone DKFZp564M193)                                                                                                                                                     | -0.3068 | 0.0225 |
| 215635_at   |           | MRNA full length insert cDNA clone EUROIMAGE 239714                                                                                                                                                   | -0.7319 | 0.0259 |
| 215665_at   | HSD3B2    | hydroxy-delta-5-steroid dehydrogenase; 3 beta- and steroid delta-isomerase 2, similar to 3 beta-hydroxysteroid dehydrogenase/delta 5-->4-isomerase type I (3Beta-HSD I) (Trophoblast antigen FDO161G) | -1.6518 | 0.043  |
| 215674_at   | KIAA1659  | KIAA1659 protein                                                                                                                                                                                      | -0.1622 | 0.0425 |

|             |              |                                                                                                          |         |        |
|-------------|--------------|----------------------------------------------------------------------------------------------------------|---------|--------|
| 215714_s_at | SMARCA4      | SWI/SNF related; matrix associated; actin dependent regulator of chromatin; subfamily a; member 4        | -1.1906 | 0.0402 |
| 215786_at   |              | CDNA FLJ12108 fis; clone MAMMA1000009                                                                    | -1.1025 | 0.0158 |
| 215802_at   |              | CDNA FLJ20137 fis; clone COL07137                                                                        | -0.579  | 0.01   |
| 215814_at   | DST          | Dystonin                                                                                                 | -0.1159 | 0.0404 |
| 215828_at   |              | MRNA; cDNA DKFZp547C126 (from clone DKFZp547C126)                                                        | -1.1829 | 0.009  |
| 215834_x_at | SCARB1       | scavenger receptor class B; member 1                                                                     | -1.3772 | 0.0188 |
| 215854_at   |              | CDNA FLJ11844 fis; clone HEMBA1006665                                                                    | -0.3886 | 0.0475 |
| 215874_at   |              | CDNA: FLJ23167 fis; clone LNG09902                                                                       | -0.238  | 0.0398 |
| 215888_at   | PDS5B        | Androgen-induced proliferation inhibitor                                                                 | -1.3633 | 0.0176 |
| 215926_x_at | SNAPC4       | small nuclear RNA activating complex; polypeptide 4; 190kDa                                              | -0.3713 | 0.0308 |
| 215940_at   |              |                                                                                                          | -0.1027 | 0.0251 |
| 215963_x_at | LOC642741    | similar to ribosomal protein L3 isoform a                                                                | -0.2838 | 0.0138 |
| 215978_x_at | LOC152719    | hypothetical protein LOC152719                                                                           | -0.4852 | 0.0297 |
| 215985_at   | HCG8         | HLA complex group 8                                                                                      | -0.5823 | 0.0298 |
| 216006_at   |              | Clone 24694 mRNA sequence                                                                                | -0.3943 | 0.0478 |
| 216028_at   | DKFZP564C152 | DKFZP564C152 protein                                                                                     | -1.6539 | 0.0224 |
| 216035_x_at | TCF7L2       | transcription factor 7-like 2 (T-cell specific; HMG-box)                                                 | -0.7153 | 0.027  |
| 216037_x_at | TCF7L2       | transcription factor 7-like 2 (T-cell specific; HMG-box)                                                 | -0.5635 | 0.016  |
| 216066_at   | ABCA1        | ATP-binding cassette; sub-family A (ABC1); member 1                                                      | -0.1922 | 0.0032 |
| 216067_at   |              | CDNA FLJ11624 fis; clone HEMBA1004193                                                                    | -0.2048 | 0.0328 |
| 216086_at   | SV2C         | synaptic vesicle glycoprotein 2C                                                                         | -1.7839 | 0.018  |
| 216093_at   |              | MRNA; cDNA DKFZp566E103 (from clone DKFZp566E103)                                                        | -0.703  | 0.0213 |
| 216113_at   | ABI2         | Abl interactor 2                                                                                         | -0.4197 | 0.0075 |
| 216147_at   |              | MRNA; cDNA DKFZp761L23121 (from clone DKFZp761L23121)                                                    | -0.3341 | 0.0214 |
| 216153_x_at | RECK         | reversion-inducing-cysteine-rich protein with kazal motifs                                               | -0.2309 | 0.0194 |
| 216165_at   | GARNL3       | GTPase activating Rap/RanGAP domain-like 3                                                               | -0.2976 | 0.019  |
| 216210_x_at | TRIOBP       | TRIO and F-actin binding protein                                                                         | -0.4616 | 0.0348 |
| 216229_x_at | HCG2P7       | HLA complex group 2 pseudogene 7                                                                         | -0.3163 | 0.0428 |
| 216278_at   |              | MRNA full length insert cDNA clone EUROIMAGE 73337                                                       | -0.6264 | 0.0326 |
| 216333_x_at | TNXB         | tenascin XB                                                                                              | -1.9115 | 0.0058 |
| 216339_s_at | TNXA         | tenascin XA pseudogene, tenascin XB                                                                      | -1.7251 | 0.0284 |
| 216436_at   | PIK3R4       | Phosphoinositide-3-kinase; regulatory subunit 4; p150                                                    | -0.1208 | 0.0476 |
| 216452_at   | TRPM3        | transient receptor potential cation channel; subfamily M; member 3                                       | -0.7312 | 0.0233 |
| 216459_x_at | TIGD1L       | tigger transposable element derived 1-like                                                               | -0.2538 | 0.006  |
| 216494_at   | LOC645468    | similar to IGF-II mRNA-binding protein 3, similar to insulin-like growth factor 2 mRNA binding protein 3 | -0.1107 | 0.0289 |
| 216550_x_at | ANKRD12      | ankyrin repeat domain 12                                                                                 | -0.5093 | 0.031  |
| 216563_at   | ANKRD12      | Ankyrin repeat domain 12                                                                                 | -0.4953 | 0.0446 |
| 216595_at   |              | MRNA; cDNA DKFZp564D042 (from clone DKFZp564D042)                                                        | -0.1502 | 0.0168 |
| 216621_at   |              | MRNA; cDNA DKFZp566F1224 (from clone DKFZp566F1224)                                                      | -0.3427 | 0.036  |
| 216657_at   | ATXN3        | ataxin 3                                                                                                 | -0.1993 | 0.0093 |
| 216682_s_at | FAM48A       | family with sequence similarity 48; member A                                                             | -0.8057 | 0.0437 |
| 216695_s_at | TNKS         | tankyrase; TRF1-interacting ankyrin-related ADP-ribose polymerase                                        | -0.2125 | 0.0224 |
| 216756_at   |              | CDNA: FLJ21342 fis; clone COL02673                                                                       | -0.3383 | 0.038  |
| 216819_at   | LOC391076    | similar to 3 beta-hydroxysteroid dehydrogenase/delta 5->4-isomerase type II (3Beta-HSD II)               | -0.1667 | 0.0492 |
| 216979_at   | NR4A3        | nuclear receptor subfamily 4; group A; member 3                                                          | -0.8461 | 0.0195 |
| 216983_s_at | ZNF224       | zinc finger protein 224                                                                                  | -0.5021 | 0.0242 |
| 217042_at   | RDH11        | retinol dehydrogenase 11 (all-trans/9-cis/11-cis)                                                        | -0.5856 | 0.0242 |
| 217059_at   | MUC7         | mucin 7; secreted                                                                                        | -0.1193 | 0.0364 |
| 217100_s_at | UBXD7        | UBX domain containing 7                                                                                  | -0.9285 | 0.0279 |
| 217152_at   |              | CDNA FLJ14074 fis; clone HEMBB1001869                                                                    | -0.5845 | 0.0006 |

|             |           |                                                                                       |         |        |
|-------------|-----------|---------------------------------------------------------------------------------------|---------|--------|
| 217164_at   |           |                                                                                       | -1.0564 | 0.006  |
| 217208_s_at | DLG1      | discs; large homolog 1 (Drosophila)                                                   | -1.2907 | 0.0167 |
| 217321_x_at | ATXN3     | Ataxin 3                                                                              | -0.1814 | 0.0115 |
| 217322_x_at |           |                                                                                       | -0.2779 | 0.0388 |
| 217437_s_at | TACC1     | transforming; acidic coiled-coil containing protein 1                                 | -0.8032 | 0.0491 |
| 217446_x_at |           | MRNA; cDNA DKFZp434M054 (from clone DKFZp434M054)                                     | -0.2651 | 0.022  |
| 217482_at   |           | CDNA FLJ11925 fis; clone HEMBB1000354                                                 | -0.5484 | 0.0448 |
| 217494_s_at | PTENP1    | phosphatase and tensin homolog (mutated in multiple advanced cancers 1); pseudogene 1 | -0.1428 | 0.04   |
| 217506_at   | LOC400642 | Hypothetical gene supported by BC041875; BX648984                                     | -1.1885 | 0.0305 |
| 217554_at   |           | Transcribed locus                                                                     | -0.4324 | 0.0041 |
| 217578_at   |           | Transcribed locus                                                                     | -0.1488 | 0.0088 |
| 217579_x_at |           | Transcribed locus                                                                     | -0.4648 | 0.0114 |
| 217591_at   |           | Transcribed locus                                                                     | -0.9583 | 0.0351 |
| 217617_at   |           | Transcribed locus                                                                     | -2.2695 | 0.0006 |
| 217649_at   | LOC732229 | Similar to Zinc finger A20 domain-containing protein 2 (Zinc finger protein 216)      | -1.1181 | 0.0151 |
| 217659_at   |           |                                                                                       | -0.4729 | 0.0301 |
| 217662_x_at |           | Transcribed locus                                                                     | -0.2679 | 0.0206 |
| 217671_at   |           | Transcribed locus                                                                     | -0.7764 | 0.01   |
| 217679_x_at |           |                                                                                       | -0.5145 | 0.0295 |
| 217715_x_at |           |                                                                                       | -0.3006 | 0.0075 |
| 217719_at   | EIF3EIP   | eukaryotic translation initiation factor 3; subunit E interacting protein             | -0.4983 | 0.0152 |
| 217804_s_at | ILF3      | interleukin enhancer binding factor 3; 90kDa                                          | -0.4716 | 0.018  |
| 217807_s_at | GLTSCR2   | glioma tumor suppressor candidate region gene 2                                       | -0.415  | 0.0081 |
| 217808_s_at | MAPKAP1   | mitogen-activated protein kinase associated protein 1                                 | -0.7796 | 0.0167 |
| 217820_s_at | ENAH      | enabled homolog (Drosophila)                                                          | -0.7126 | 0.0072 |
| 217833_at   | SYNCRIP   | synaptotagmin binding; cytoplasmic RNA interacting protein                            | -0.5837 | 0.0294 |
| 217841_s_at | PPME1     | protein phosphatase methylesterase 1                                                  | -0.513  | 0.0396 |
| 217885_at   | IPO9      | importin 9                                                                            | -0.8467 | 0.0164 |
| 217894_at   | KCTD3     | potassium channel tetramerisation domain containing 3                                 | -0.8873 | 0.0054 |
| 217996_at   | PHLDA1    | pleckstrin homology-like domain; family A; member 1                                   | -2.2808 | 0.0345 |
| 217997_at   | PHLDA1    | pleckstrin homology-like domain; family A; member 1                                   | -2.0299 | 0.0479 |
| 217999_s_at | PHLDA1    | pleckstrin homology-like domain; family A; member 1                                   | -1.7543 | 0.0475 |
| 218000_s_at | PHLDA1    | pleckstrin homology-like domain; family A; member 1                                   | -1.1531 | 0.0254 |
| 218064_s_at | AKAP8L    | A kinase (PRKA) anchor protein 8-like                                                 | -0.8534 | 0.0278 |
| 218132_s_at | TSEN34    | tRNA splicing endonuclease 34 homolog (S. cerevisiae)                                 | -0.4046 | 0.0193 |
| 218236_s_at | PRKD3     | protein kinase D3                                                                     | -1.2052 | 0.05   |
| 218240_at   | NKIRAS2   | NFKB inhibitor interacting Ras-like 2                                                 | -0.5367 | 0.0083 |
| 218242_s_at | SUV420H1  | suppressor of variegation 4-20 homolog 1 (Drosophila)                                 | -0.7022 | 0.0167 |
| 218258_at   | POLR1D    | polymerase (RNA) I polypeptide D; 16kDa                                               | -0.8674 | 0.0052 |
| 218263_s_at | ZBED5     | zinc finger; BED-type containing 5                                                    | -0.4226 | 0.018  |
| 218274_s_at | ANKZF1    | ankyrin repeat and zinc finger domain containing 1                                    | -0.8908 | 0.0015 |
| 218311_at   | MAP4K3    | mitogen-activated protein kinase kinase kinase kinase 3                               | -0.6731 | 0.0301 |
| 218323_at   | RHOT1     | ras homolog gene family; member T1                                                    | -0.4165 | 0.0312 |
| 218427_at   | SDCCAG3   | serologically defined colon cancer antigen 3                                          | -0.4    | 0.0312 |
| 218428_s_at | REV1      | REV1 homolog (S. cerevisiae)                                                          | -0.7486 | 0.0218 |
| 218434_s_at | AACS      | acetoacetyl-CoA synthetase                                                            | -1.1966 | 0.0039 |
| 218471_s_at | BBS1      | Bardet-Biedl syndrome 1                                                               | -0.6822 | 0.02   |
| 218476_at   | POMT1     | protein-O-mannosyltransferase 1                                                       | -0.687  | 0.0046 |
| 218546_at   | C1orf115  | chromosome 1 open reading frame 115                                                   | -1.8222 | 0.0379 |
| 218565_at   | C9orf114  | chromosome 9 open reading frame 114                                                   | -0.576  | 0.0189 |
| 218613_at   | PSD3      | pleckstrin and Sec7 domain containing 3                                               | -2.2516 | 0.0138 |
| 218618_s_at | FNDC3B    | fibronectin type III domain containing 3B                                             | -0.6264 | 0.0412 |
| 218625_at   | NRN1      | neuritin 1                                                                            | -3.2848 | 0.0019 |
| 218636_s_at | MAN1B1    | mannosidase; alpha; class 1B; member 1                                                | -0.7748 | 0.0108 |
| 218767_at   | REXO4     | REX4; RNA exonuclease 4 homolog (S. cerevisiae)                                       | -0.3444 | 0.0463 |
| 218880_at   | FOSL2     | FOS-like antigen 2                                                                    | -1.2515 | 0.0427 |

|             |           |                                                                                                                                                            |         |        |
|-------------|-----------|------------------------------------------------------------------------------------------------------------------------------------------------------------|---------|--------|
| 218881_s_at | FOSL2     | FOS-like antigen 2                                                                                                                                         | -0.7313 | 0.0101 |
| 218906_x_at | KLC2      | kinesin light chain 2                                                                                                                                      | -0.3866 | 0.0427 |
| 218957_s_at | PAAF1     | proteasomal ATPase-associated factor 1                                                                                                                     | -0.79   | 0.0171 |
| 218979_at   | RMI1      | RMI1; RecQ mediated genome instability 1; homolog (S. cerevisiae)                                                                                          | -0.7152 | 0.0304 |
| 219093_at   | PID1      | phosphotyrosine interaction domain containing 1                                                                                                            | -1.9632 | 0.0212 |
| 219116_s_at | DCUN1D2   | DCN1; defective in cullin neddylation 1; domain containing 2 (S. cerevisiae)                                                                               | -0.6867 | 0.0212 |
| 219152_at   | PODXL2    | podocalyxin-like 2                                                                                                                                         | -0.2257 | 0.0049 |
| 219165_at   | PDLIM2    | PDZ and LIM domain 2 (mystique)                                                                                                                            | -1.1579 | 0.026  |
| 219169_s_at | TFB1M     | transcription factor B1; mitochondrial                                                                                                                     | -0.9582 | 0.0037 |
| 219312_s_at | ZBTB10    | zinc finger and BTB domain containing 10                                                                                                                   | -0.8761 | 0.0368 |
| 219317_at   | POLI      | polymerase (DNA directed) iota                                                                                                                             | -0.963  | 0.0264 |
| 219353_at   | NHLRC2    | NHL repeat containing 2                                                                                                                                    | -0.7253 | 0.0038 |
| 219380_x_at | POLH      | polymerase (DNA directed); eta                                                                                                                             | -0.3249 | 0.0273 |
| 219407_s_at | LAMC3     | laminin; gamma 3                                                                                                                                           | -2.0492 | 0.0294 |
| 219492_at   | CHIC2     | cysteine-rich hydrophobic domain 2                                                                                                                         | -0.6522 | 0.0398 |
| 219532_at   | ELOVL4    | elongation of very long chain fatty acids (FEN1/Elo2; SUR4/Elo3; yeast)-like 4                                                                             | -1.7014 | 0.0216 |
| 219625_s_at | COL4A3BP  | collagen; type IV; alpha 3 (Goodpasture antigen) binding protein                                                                                           | -0.724  | 0.0047 |
| 219657_s_at | KLF3      | Kruppel-like factor 3 (basic)                                                                                                                              | -0.8454 | 0.022  |
| 219670_at   | C1orf165  | chromosome 1 open reading frame 165                                                                                                                        | -1.2529 | 0.0159 |
| 219779_at   | ZFHX4     | zinc finger homeobox 4                                                                                                                                     | -2.2943 | 0.0114 |
| 219794_at   | VPS53     | vacuolar protein sorting 53 homolog (S. cerevisiae)                                                                                                        | -0.1546 | 0.0379 |
| 219825_at   | CYP26B1   | cytochrome P450; family 26; subfamily B; polypeptide 1                                                                                                     | -1.7965 | 0.026  |
| 219844_at   | C10orf118 | chromosome 10 open reading frame 118                                                                                                                       | -0.2687 | 0.0429 |
| 219950_s_at | TIAM2     | T-cell lymphoma invasion and metastasis 2                                                                                                                  | -0.1171 | 0.0102 |
| 219998_at   | HSPC159   | galectin-related protein                                                                                                                                   | -0.9864 | 0.025  |
| 220102_at   | FOXL2     | forkhead box L2                                                                                                                                            | -1.2867 | 0.0323 |
| 220175_s_at | CBWD1     | COBW domain containing 1, COBW domain containing 2, COBW domain containing 3, COBW domain containing 5, COBW domain containing 6, COBW domain containing 7 | -0.5053 | 0.0224 |
| 220195_at   | MBD5      | methyl-CpG binding domain protein 5                                                                                                                        | -1.063  | 0.0017 |
| 220221_at   | VPS13D    | vacuolar protein sorting 13 homolog D (S. cerevisiae)                                                                                                      | -0.4974 | 0.0204 |
| 220328_at   | PHC3      | polyhomeotic homolog 3 (Drosophila)                                                                                                                        | -0.2144 | 0.0305 |
| 220338_at   | RALGPS2   | Ral GEF with PH domain and SH3 binding motif 2                                                                                                             | -0.4632 | 0.0393 |
| 220400_at   | VPS13B    | vacuolar protein sorting 13 homolog B (yeast)                                                                                                              | -0.2353 | 0.0083 |
| 220459_at   | MCM3APAS  | minichromosome maintenance complex component 3 associated protein antisense                                                                                | -1.3442 | 0.0322 |
| 220467_at   | FLJ21272  | hypothetical protein FLJ21272                                                                                                                              | -1.3251 | 0.0202 |
| 220512_at   | DLC1      | deleted in liver cancer 1                                                                                                                                  | -1.2946 | 0.0499 |
| 220533_at   |           |                                                                                                                                                            | -0.4706 | 0.044  |
| 220581_at   | C6orf97   | chromosome 6 open reading frame 97                                                                                                                         | -1.0848 | 0.0164 |
| 220612_at   |           | Clone HQ0641 PRO0641                                                                                                                                       | -0.2906 | 0.0327 |
| 220660_at   | C9orf27   | chromosome 9 open reading frame 27                                                                                                                         | -0.1228 | 0.0427 |
| 220670_at   |           |                                                                                                                                                            | -0.1405 | 0.0459 |
| 220694_at   | DDEF1IT1  | DDEF1 intronic transcript 1                                                                                                                                | -0.6985 | 0.0011 |
| 220702_at   |           |                                                                                                                                                            | -0.8463 | 0.0125 |
| 220711_at   |           |                                                                                                                                                            | -0.344  | 0.0261 |
| 220720_x_at | FAM128B   | family with sequence similarity 128; member B                                                                                                              | -0.6391 | 0.0066 |
| 220728_at   |           |                                                                                                                                                            | -0.8819 | 0.0017 |
| 220774_at   | DYM       | dymeclin                                                                                                                                                   | -0.4115 | 0.0175 |
| 220796_x_at | SLC35E1   | solute carrier family 35; member E1                                                                                                                        | -0.4735 | 0.0257 |
| 220803_at   | STAMBPL1  | STAM binding protein-like 1                                                                                                                                | -0.3159 | 0.0013 |
| 220858_at   | SORBS2    | sorbin and SH3 domain containing 2                                                                                                                         | -1.4552 | 0.0302 |
| 220906_at   |           |                                                                                                                                                            | -0.6478 | 0.0213 |
| 220925_at   | MAK10     | MAK10 homolog; amino-acid N-acetyltransferase subunit; (S. cerevisiae)                                                                                     | -0.559  | 0.0452 |
| 220952_s_at | PLEKHA5   | pleckstrin homology domain containing; family A member 5                                                                                                   | -0.9652 | 0.0445 |

|             |           |                                                                                  |         |        |
|-------------|-----------|----------------------------------------------------------------------------------|---------|--------|
| 220975_s_at | C1QTNF1   | C1q and tumor necrosis factor related protein 1                                  | -1.1907 | 0.0195 |
| 221004_s_at | ITM2C     | integral membrane protein 2C                                                     | -1.0397 | 0.0426 |
| 221009_s_at | ANGPTL4   | angiopoietin-like 4                                                              | -1.2304 | 0.0271 |
| 221039_s_at | DDEF1     | development and differentiation enhancing factor 1                               | -0.8157 | 0.0093 |
| 221208_s_at | C11orf61  | chromosome 11 open reading frame 61                                              | -0.6353 | 0.0245 |
| 221274_s_at | LMAN2L    | lectin; mannose-binding 2-like                                                   | -0.7052 | 0.0013 |
| 221391_at   | TAS2R14   | taste receptor; type 2; member 14                                                | -0.1693 | 0.0294 |
| 221395_at   | TAS2R13   | taste receptor; type 2; member 13                                                | -0.1254 | 0.0041 |
| 221478_at   | BNIP3L    | BCL2/adenovirus E1B 19kDa interacting protein 3-like                             | -0.5151 | 0.0368 |
| 221516_s_at | SMCR7L    | Smith-Magenis syndrome chromosome region; candidate 7-like                       | -0.7357 | 0.0476 |
| 221592_at   | TBC1D8    | TBC1 domain family; member 8 (with GRAM domain)                                  | -0.2407 | 0.0048 |
| 221599_at   | C11orf67  | chromosome 11 open reading frame 67                                              | -0.7829 | 0.0109 |
| 221600_s_at | C11orf67  | chromosome 11 open reading frame 67                                              | -0.9752 | 0.0301 |
| 221616_s_at | TAF9B     | TAF9B RNA polymerase II; TATA box binding protein (TBP)-associated factor; 31kDa | -0.8015 | 0.0377 |
| 221617_at   | TAF9B     | TAF9B RNA polymerase II; TATA box binding protein (TBP)-associated factor; 31kDa | -1.117  | 0.0158 |
| 221663_x_at | HRH3      | histamine receptor H3                                                            | -0.2424 | 0.043  |
| 221743_at   | CUGBP1    | CUG triplet repeat; RNA binding protein 1                                        | -0.4571 | 0.0049 |
| 221744_at   | WDR68     | WD repeat domain 68                                                              | -0.5966 | 0.0244 |
| 221747_at   | TNS1      | Tensin 1                                                                         | -1.002  | 0.0438 |
| 221748_s_at | TNS1      | tensin 1                                                                         | -0.9874 | 0.0252 |
| 221751_at   | SLC2A3P1  | Solute carrier family 2 (facilitated glucose transporter); member 3 pseudogene 1 | -0.5027 | 0.0254 |
| 221763_at   | JMJD1C    | jumonji domain containing 1C                                                     | -0.7416 | 0.0141 |
| 221765_at   | UGCG      | UDP-glucose ceramide glucosyltransferase                                         | -2.4197 | 0.0018 |
| 221806_s_at | SETD5     | SET domain containing 5                                                          | -0.5204 | 0.0482 |
| 221842_s_at | ZNF131    | zinc finger protein 131                                                          | -0.3343 | 0.0443 |
| 221860_at   | HNRNPL    | heterogeneous nuclear ribonucleoprotein L                                        | -0.9306 | 0.0105 |
| 221958_s_at | GPR177    | G protein-coupled receptor 177                                                   | -1.2407 | 0.0123 |
| 222034_at   | GNB2L1    | Guanine nucleotide binding protein (G protein); beta polypeptide 2-like 1        | -0.9788 | 0.0447 |
| 222066_at   | EPB41L1   | Erythrocyte membrane protein band 4.1-like 1                                     | -0.2307 | 0.0043 |
| 222099_s_at | LSM14A    | LSM14A; SCD6 homolog A (S. cerevisiae)                                           | -0.6236 | 0.002  |
| 222128_at   | NSUN6     | NOL1/NOP2/Sun domain family; member 6                                            | -1.0473 | 0.0034 |
| 222133_s_at | PHF20L1   | PHD finger protein 20-like 1                                                     | -0.9969 | 0.0146 |
| 222146_s_at | TCF4      | transcription factor 4                                                           | -1.0272 | 0.0277 |
| 222160_at   | AKAP8L    | A kinase (PRKA) anchor protein 8-like                                            | -0.4021 | 0.0098 |
| 222167_at   |           | CDNA FLJ11774 fis; clone HEMBA1005884                                            | -0.7403 | 0.0164 |
| 222180_at   |           | CDNA FLJ14122 fis; clone MAMMA1002033                                            | -0.522  | 0.0372 |
| 222207_x_at | LOC389517 | Williams Beuren syndrome chromosome region 19 pseudogene                         | -0.174  | 0.0256 |
| 222209_s_at | TMEM135   | transmembrane protein 135                                                        | -1.2646 | 0.023  |
| 222214_at   |           | CDNA: FLJ21335 fis; clone COL02546                                               | -1.1366 | 0.0177 |
| 222244_s_at | TUG1      | taurine upregulated gene 1                                                       | -0.4255 | 0.0343 |
| 222245_s_at | FER1L4    | fer-1-like 4 (C. elegans)                                                        | -1.121  | 0.0468 |
| 222258_s_at | SH3BP4    | SH3-domain binding protein 4                                                     | -1.6167 | 0.0117 |
| 222266_at   | C19orf2   | Chromosome 19 open reading frame 2                                               | -0.7778 | 0.0213 |
| 222270_at   | SMEK2     | SMEK homolog 2; suppressor of mek1 (Dictyostelium)                               | -0.5762 | 0.0042 |
| 222286_at   | SNAPC3    | small nuclear RNA activating complex; polypeptide 3; 50kDa                       | -0.7918 | 0.0181 |
| 222297_x_at | LOC390612 | similar to ribosomal protein L18                                                 | -0.202  | 0.0128 |
| 222306_at   |           | Transcribed locus                                                                | -0.4096 | 0.0092 |
| 222310_at   | SFRS15    | splicing factor; arginine/serine-rich 15                                         | -1.1308 | 0.0164 |
| 222311_s_at | SFRS15    | splicing factor; arginine/serine-rich 15                                         | -0.8897 | 0.0169 |
| 222320_at   |           | Transcribed locus                                                                | -1.0901 | 0.0087 |
| 222357_at   | ZBTB20    | zinc finger and BTB domain containing 20                                         | -1.4412 | 0.0052 |
| 222372_at   |           | Transcribed locus                                                                | -1.3038 | 0.0097 |
| 222375_at   |           | Transcribed locus                                                                | -0.6723 | 0.014  |
| 222426_at   | MAPKAP1   | mitogen-activated protein kinase associated protein 1                            | -0.8223 | 0.0068 |
| 222433_at   | ENAH      | enabled homolog (Drosophila)                                                     | -0.6599 | 0.0078 |



|             |           |                                                                                                                                                                        |         |        |
|-------------|-----------|------------------------------------------------------------------------------------------------------------------------------------------------------------------------|---------|--------|
| 222434_at   | ENAH      | enabled homolog (Drosophila)                                                                                                                                           | -0.9334 | 0.0262 |
| 222544_s_at | WHSC1L1   | Wolf-Hirschhorn syndrome candidate 1-like 1                                                                                                                            | -0.8882 | 0.0107 |
| 222557_at   | STMN3     | stathmin-like 3                                                                                                                                                        | -1.2912 | 0.0497 |
| 222565_s_at | PRKD3     | protein kinase D3                                                                                                                                                      | -1.4026 | 0.0286 |
| 222589_at   | NLK       | nemo-like kinase                                                                                                                                                       | -0.9827 | 0.0174 |
| 222628_s_at | REV1      | REV1 homolog (S. cerevisiae)                                                                                                                                           | -1.0157 | 0.0061 |
| 222629_at   | REV1      | REV1 homolog (S. cerevisiae)                                                                                                                                           | -1.0276 | 0.0369 |
| 222654_at   | IMPAD1    | inositol monophosphatase domain containing 1                                                                                                                           | -0.6561 | 0.0496 |
| 222655_s_at | IMPAD1    | inositol monophosphatase domain containing 1                                                                                                                           | -0.2368 | 0.0182 |
| 222667_s_at | ASH1L     | ash1 (absent; small; or homeotic)-like (Drosophila)                                                                                                                    | -0.8004 | 0.0053 |
| 222670_s_at | MAFB      | v-maf musculoaponeurotic fibrosarcoma oncogene homolog B (avian)                                                                                                       | -0.9282 | 0.0446 |
| 222694_at   | MGC2752   | hypothetical protein MGC2752                                                                                                                                           | -0.5825 | 0.0405 |
| 222696_at   | AXIN2     | axin 2 (conductin; axil)                                                                                                                                               | -1.7715 | 0.0051 |
| 222700_at   | ARL6IP2   | ADP-ribosylation factor-like 6 interacting protein 2                                                                                                                   | -0.7677 | 0.0252 |
| 222708_s_at | STX17     | syntaxin 17                                                                                                                                                            | -1.1169 | 0.0004 |
| 222715_s_at | AP1GBP1   | AP1 gamma subunit binding protein 1                                                                                                                                    | -0.8903 | 0.0338 |
| 222759_at   | SUV420H1  | suppressor of variegation 4-20 homolog 1 (Drosophila)                                                                                                                  | -1.511  | 0.0035 |
| 222760_at   | ZNF703    | zinc finger protein 703                                                                                                                                                | -0.9182 | 0.0494 |
| 222790_s_at | RSBN1     | round spermatid basic protein 1                                                                                                                                        | -0.4582 | 0.0389 |
| 222791_at   | RSBN1     | round spermatid basic protein 1                                                                                                                                        | -0.6706 | 0.0268 |
| 222807_at   | C11orf30  | chromosome 11 open reading frame 30                                                                                                                                    | -0.7405 | 0.0231 |
| 222823_at   | IPPK      | inositol 1;3;4;5;6-pentakisphosphate 2-kinase                                                                                                                          | -0.173  | 0.0495 |
| 222873_s_at | EHMT1     | euchromatic histone-lysine N-methyltransferase 1                                                                                                                       | -0.669  | 0.0443 |
| 222917_s_at | TBX3      | T-box 3 (ulnar mammary syndrome)                                                                                                                                       | -1.0771 | 0.0253 |
| 222988_s_at | TMEM9     | transmembrane protein 9                                                                                                                                                | -0.9102 | 0.0097 |
| 223129_x_at | MYLIP     | myosin regulatory light chain interacting protein                                                                                                                      | -0.9746 | 0.0498 |
| 223169_s_at | RHOU      | ras homolog gene family; member U                                                                                                                                      | -2.0895 | 0.0307 |
| 223170_at   | LOC440181 | hypothetical LOC440181, transmembrane protein 98                                                                                                                       | -1.2722 | 0.0481 |
| 223190_s_at | MLL5      | myeloid/lymphoid or mixed-lineage leukemia 5 (trithorax homolog; Drosophila)                                                                                           | -0.533  | 0.0234 |
| 223207_x_at | PHPT1     | phosphohistidine phosphatase 1                                                                                                                                         | -0.5357 | 0.0038 |
| 223226_x_at | SSBP4     | single stranded DNA binding protein 4                                                                                                                                  | -0.792  | 0.0125 |
| 223311_s_at | MTA3      | metastasis associated 1 family; member 3                                                                                                                               | -0.7576 | 0.0219 |
| 223333_s_at | ANGPTL4   | angiopoietin-like 4                                                                                                                                                    | -1.2123 | 0.0252 |
| 223434_at   | GBP3      | guanylate binding protein 3                                                                                                                                            | -1.2873 | 0.0272 |
| 223437_at   | PPARA     | peroxisome proliferator-activated receptor alpha                                                                                                                       | -1.1969 | 0.0315 |
| 223466_x_at | COL4A3BP  | collagen; type IV; alpha 3 (Goodpasture antigen) binding protein                                                                                                       | -0.7118 | 0.005  |
| 223498_at   | SPECC1    | sperm antigen with calponin homology and coiled-coil domains 1                                                                                                         | -0.2272 | 0.0223 |
| 223559_s_at | C9orf80   | chromosome 9 open reading frame 80                                                                                                                                     | -0.5392 | 0.0263 |
| 223577_x_at | PRO1073   | PRO1073 protein                                                                                                                                                        | -0.8457 | 0.0169 |
| 223598_at   | RAD23B    | RAD23 homolog B (S. cerevisiae)                                                                                                                                        | -0.7085 | 0.0196 |
| 223612_s_at | LNK1      | ligand of numb-protein X 1                                                                                                                                             | -0.1414 | 0.0066 |
| 223619_x_at | PECR      | peroxisomal trans-2-enoyl-CoA reductase                                                                                                                                | -0.3064 | 0.0098 |
| 223638_at   | NBPF3     | neuroblastoma breakpoint family; member 3                                                                                                                              | -0.8953 | 0.0271 |
| 223641_at   |           | CDNA FLJ36838 fis; clone ASTRO2011426                                                                                                                                  | -0.867  | 0.0102 |
| 223662_x_at | DDX59     | DEAD (Asp-Glu-Ala-Asp) box polypeptide 59                                                                                                                              | -0.2968 | 0.0368 |
| 223679_at   | CTNBN1    | catenin (cadherin-associated protein); beta 1; 88kDa                                                                                                                   | -1.7974 | 0.0022 |
| 223698_at   | SLC25A36  | solute carrier family 25; member 36                                                                                                                                    | -0.3263 | 0.0397 |
| 223703_at   | C10orf11  | chromosome 10 open reading frame 11                                                                                                                                    | -1.7552 | 0.0018 |
| 223764_x_at | NIPSNAP3B | nipsnap homolog 3B (C. elegans)                                                                                                                                        | -1.1844 | 0.034  |
| 223796_at   | CNTNAP3   | contactin associated protein-like 3, contactin associated protein-like 3B, similar to Contactin-associated protein-like 3 precursor (Cell recognition molecule Caspr3) | -1.2776 | 0.0296 |
| 223797_at   | PRO2852   | hypothetical protein PRO2852                                                                                                                                           | -0.9813 | 0.0238 |
| 223802_s_at | RBBP6     | retinoblastoma binding protein 6                                                                                                                                       | -0.7476 | 0.0234 |
| 223818_s_at | RSF1      | remodeling and spacing factor 1                                                                                                                                        | -0.5994 | 0.0217 |
| 223877_at   | C1QTNF7   | C1q and tumor necrosis factor related protein 7                                                                                                                        | -0.1309 | 0.0408 |
| 223878_at   | INPP4B    | inositol polyphosphate-4-phosphatase; type II; 105kDa                                                                                                                  | -0.1338 | 0.0342 |
| 223915_at   | BCOR      | BCL6 co-repressor                                                                                                                                                      | -0.8568 | 0.0147 |

|             |           |                                                                                                                        |         |        |
|-------------|-----------|------------------------------------------------------------------------------------------------------------------------|---------|--------|
| 223966_at   | UBE2D2    | ubiquitin-conjugating enzyme E2D 2 (UBC4/5 homolog; yeast), ubiquitin-conjugating enzyme E2D 3 (UBC4/5 homolog; yeast) | -0.2431 | 0.0088 |
| 224014_at   | ZNF160    | zinc finger protein 160                                                                                                | -0.4279 | 0.0185 |
| 224029_x_at | SCN11A    | sodium channel; voltage-gated; type XI; alpha subunit                                                                  | -0.184  | 0.0289 |
| 224044_at   | RHOT1     | ras homolog gene family; member T1                                                                                     | -0.6279 | 0.0037 |
| 224050_s_at |           |                                                                                                                        | -0.1245 | 0.012  |
| 224106_at   |           |                                                                                                                        | -0.5943 | 0.0053 |
| 224126_at   | SLC10A7   | solute carrier family 10 (sodium/bile acid cotransporter family); member 7                                             | -0.1238 | 0.0493 |
| 224176_s_at | AXIN2     | axin 2 (conductin; axil)                                                                                               | -0.304  | 0.0327 |
| 224276_at   | ZNF33A    | zinc finger protein 33A                                                                                                | -0.1341 | 0.0428 |
| 224277_at   | MOP-1     | MOP-1                                                                                                                  | -0.148  | 0.006  |
| 224320_s_at | MCM8      | minichromosome maintenance complex component 8                                                                         | -0.5908 | 0.0311 |
| 224454_at   | ETNK1     | ethanolamine kinase 1                                                                                                  | -0.1359 | 0.0431 |
| 224569_s_at | IRF2BP2   | interferon regulatory factor 2 binding protein 2                                                                       | -0.6007 | 0.0444 |
| 224609_at   | SLC44A2   | solute carrier family 44; member 2                                                                                     | -1.0718 | 0.034  |
| 224621_at   | MAPK1     | mitogen-activated protein kinase 1                                                                                     | -0.571  | 0.0213 |
| 224624_at   | LRRRC8A   | leucine rich repeat containing 8 family; member A                                                                      | -0.489  | 0.0408 |
| 224651_at   | CCNY      | cyclin Y                                                                                                               | -0.6695 | 0.0152 |
| 224662_at   | KIF5B     | kinesin family member 5B                                                                                               | -0.3043 | 0.0476 |
| 224667_x_at | C10orf104 | chromosome 10 open reading frame 104                                                                                   | -0.296  | 0.0356 |
| 224720_at   | MIB1      | mindbomb homolog 1 (Drosophila)                                                                                        | -0.6446 | 0.0487 |
| 224725_at   | MIB1      | mindbomb homolog 1 (Drosophila)                                                                                        | -0.7698 | 0.0426 |
| 224755_at   | TM9SF3    | transmembrane 9 superfamily member 3                                                                                   | -0.973  | 0.0127 |
| 224760_at   | SP1       | Sp1 transcription factor                                                                                               | -0.5636 | 0.0258 |
| 224763_at   | RPL37     | Ribosomal protein L37                                                                                                  | -1.0575 | 0.0288 |
| 224771_at   | NAV1      | neuron navigator 1                                                                                                     | -0.8727 | 0.0362 |
| 224784_at   | MLLT6     | myeloid/lymphoid or mixed-lineage leukemia (trithorax homolog; Drosophila); translocated to; 6                         | -0.5265 | 0.0259 |
| 224790_at   | DDEF1     | development and differentiation enhancing factor 1                                                                     | -0.7222 | 0.0357 |
| 224796_at   | DDEF1     | development and differentiation enhancing factor 1                                                                     | -0.6594 | 0.0127 |
| 224814_at   | DPP7      | dipeptidyl-peptidase 7                                                                                                 | -0.8572 | 0.0026 |
| 224820_at   | FAM36A    | family with sequence similarity 36; member A                                                                           | -0.9258 | 0.0253 |
| 224847_at   | CDK6      | cyclin-dependent kinase 6                                                                                              | -1.6004 | 0.0358 |
| 224848_at   | CDK6      | cyclin-dependent kinase 6                                                                                              | -1.8266 | 0.0162 |
| 224851_at   | CDK6      | cyclin-dependent kinase 6                                                                                              | -2.2481 | 0.0054 |
| 224872_at   | DIP2B     | DIP2 disco-interacting protein 2 homolog B (Drosophila)                                                                | -0.734  | 0.0016 |
| 224897_at   | WDR26     | WD repeat domain 26                                                                                                    | -0.645  | 0.0207 |
| 224933_s_at | JMJD1C    | jumonji domain containing 1C                                                                                           | -1.1325 | 0.0043 |
| 224937_at   | PTGFRN    | prostaglandin F2 receptor negative regulator                                                                           | -1.3708 | 0.0419 |
| 224967_at   | UGCG      | UDP-glucose ceramide glucosyltransferase                                                                               | -1.5671 | 0.0005 |
| 224998_at   | CMTM4     | CKLF-like MARVEL transmembrane domain containing 4                                                                     | -1.0483 | 0.0086 |
| 225009_at   | CMTM4     | CKLF-like MARVEL transmembrane domain containing 4                                                                     | -1.3014 | 0.0031 |
| 225032_at   | FNDC3B    | fibronectin type III domain containing 3B                                                                              | -0.4787 | 0.0358 |
| 225098_at   | ABI2      | abl interactor 2                                                                                                       | -0.8298 | 0.0025 |
| 225112_at   | ABI2      | abl interactor 2                                                                                                       | -0.7237 | 0.0016 |
| 225126_at   | MRRF      | mitochondrial ribosome recycling factor                                                                                | -0.7466 | 0.0236 |
| 225138_at   | ZRANB1    | zinc finger; RAN-binding domain containing 1                                                                           | -0.6666 | 0.0377 |
| 225171_at   | ARHGAP18  | Rho GTPase activating protein 18                                                                                       | -0.8015 | 0.025  |
| 225175_s_at | SLC44A2   | solute carrier family 44; member 2                                                                                     | -0.848  | 0.0146 |
| 225193_at   | KIAA1967  | KIAA1967                                                                                                               | -0.8572 | 0.0228 |
| 225197_at   |           | MRNA; cDNA DKFZp451O1818 (from clone DKFZp451O1818)                                                                    | -0.8846 | 0.0409 |
| 225217_s_at | BRPF3     | bromodomain and PHD finger containing; 3                                                                               | -1.8699 | 0.0357 |
| 225233_at   | MSI2      | musashi homolog 2 (Drosophila)                                                                                         | -0.4529 | 0.0085 |
| 225237_s_at | MSI2      | musashi homolog 2 (Drosophila)                                                                                         | -1.2229 | 0.0003 |
| 225240_s_at | MSI2      | musashi homolog 2 (Drosophila)                                                                                         | -1.1945 | 0      |
| 225256_at   |           | CDNA FLJ41369 fis; clone BRCAN2006117                                                                                  | -0.4935 | 0.041  |
| 225266_at   | ZNF652    | zinc finger protein 652                                                                                                | -0.7682 | 0.001  |
| 225275_at   | EDIL3     | EGF-like repeats and discoidin I-like domains 3                                                                        | -2.2756 | 0.0152 |

|             |           |                                                                                                 |         |        |
|-------------|-----------|-------------------------------------------------------------------------------------------------|---------|--------|
| 225371_at   | GLE1L     | GLE1 RNA export mediator-like (yeast)                                                           | -0.766  | 0.013  |
| 225385_s_at | HNRPLL    | heterogeneous nuclear ribonucleoprotein L-like                                                  | -0.4523 | 0.0203 |
| 225393_at   | GATAD2B   | GATA zinc finger domain containing 2B                                                           | -0.5047 | 0.0132 |
| 225406_at   | TWSG1     | twisted gastrulation homolog 1 (Drosophila)                                                     | -0.9624 | 0.0108 |
| 225420_at   | GPAM      | glycerol-3-phosphate acyltransferase; mitochondrial                                             | -1.8463 | 0.0077 |
| 225422_at   | CDC26     | cell division cycle 26 homolog (S. cerevisiae)                                                  | -0.5574 | 0.0499 |
| 225424_at   | GPAM      | glycerol-3-phosphate acyltransferase; mitochondrial                                             | -2.2443 | 0.0021 |
| 225461_at   | EHMT1     | euchromatic histone-lysine N-methyltransferase 1                                                | -1.0693 | 0.0044 |
| 225466_at   | FLJ36874  | FLJ36874 protein                                                                                | -0.5688 | 0.0371 |
| 225473_at   | C20orf117 | chromosome 20 open reading frame 117                                                            | -0.6942 | 0.0328 |
| 225496_s_at | SYTL2     | synaptotagmin-like 2                                                                            | -2.2437 | 0.0274 |
| 225504_at   |           | MRNA; cDNA DKFZp686E0389 (from clone DKFZp686E0389)                                             | -0.6986 | 0.0495 |
| 225522_at   | AAK1      | AP2 associated kinase 1                                                                         | -0.5091 | 0.0156 |
| 225544_at   | TBX3      | T-box 3 (ulnar mammary syndrome)                                                                | -1.2909 | 0.0435 |
| 225565_at   |           | CDNA FLJ34215 fis; clone FCBBF3021985                                                           | -0.4597 | 0.0294 |
| 225569_at   | EIF2C2    | Eukaryotic translation initiation factor 2C; 2                                                  | -1.024  | 0.0211 |
| 225570_at   | SLC41A1   | solute carrier family 41; member 1                                                              | -1.2477 | 0.0061 |
| 225571_at   | LIFR      | leukemia inhibitory factor receptor alpha                                                       | -1.7324 | 0.0103 |
| 225575_at   | LIFR      | leukemia inhibitory factor receptor alpha                                                       | -1.9125 | 0.0174 |
| 225586_at   | WDR85     | WD repeat domain 85                                                                             | -0.5235 | 0.0324 |
| 225594_at   | CREBZF    | CREB/ATF bZIP transcription factor                                                              | -1.2246 | 0.0117 |
| 225595_at   | CREBZF    | CREB/ATF bZIP transcription factor                                                              | -0.8359 | 0.042  |
| 225652_at   |           | CDNA FLJ37981 fis; clone CTONG2010566                                                           | -1.1733 | 0.007  |
| 225677_at   | BCAP29    | B-cell receptor-associated protein 29                                                           | -0.6121 | 0.0493 |
| 225703_at   | KIAA1545  | KIAA1545 protein                                                                                | -0.672  | 0.0267 |
| 225717_at   | KIAA1715  | KIAA1715                                                                                        | -0.8052 | 0.0331 |
| 225729_at   | C6orf89   | chromosome 6 open reading frame 89                                                              | -0.624  | 0.0361 |
| 225740_x_at | MDM4      | Mdm4; transformed 3T3 cell double minute 4; p53 binding protein (mouse)                         | -0.7362 | 0.0175 |
| 225745_at   | LRP6      | low density lipoprotein receptor-related protein 6                                              | -0.9533 | 0.0125 |
| 225817_at   | CGNL1     | cingulin-like 1                                                                                 | -2.4362 | 0.0385 |
| 225842_at   | PHLDA1    | pleckstrin homology-like domain; family A; member 1                                             | -2.0256 | 0.0359 |
| 225845_at   | ZBTB44    | zinc finger and BTB domain containing 44                                                        | -0.517  | 0.0159 |
| 225889_at   | AEBP2     | AE binding protein 2                                                                            | -0.6303 | 0.0147 |
| 225896_at   |           | CDNA FLJ34018 fis; clone FCBBF2002801                                                           | -0.4432 | 0.0407 |
| 225898_at   | WDR54     | WD repeat domain 54                                                                             | -1.6007 | 0.0152 |
| 225918_at   | LOC146346 | hypothetical protein LOC146346                                                                  | -0.8441 | 0.0119 |
| 225992_at   | MLLT10    | myeloid/lymphoid or mixed-lineage leukemia (trithorax homolog; Drosophila); translocated to; 10 | -0.7764 | 0.0344 |
| 226010_at   | SLC25A23  | solute carrier family 25 (mitochondrial carrier; phosphate carrier); member 23                  | -0.9761 | 0.0222 |
| 226102_at   |           | Full-length cDNA clone CS0DF010YE22 of Fetal brain of Homo sapiens (human)                      | -1.1103 | 0.044  |
| 226110_at   | PTAR1     | protein prenyltransferase alpha subunit repeat containing 1                                     | -0.6686 | 0.0123 |
| 226129_at   | FAM83H    | family with sequence similarity 83; member H                                                    | -1.174  | 0.0337 |
| 226134_s_at |           | Transcribed locus                                                                               | -1.053  | 0.0001 |
| 226143_at   | RAI1      | retinoic acid induced 1                                                                         | -0.5106 | 0.0268 |
| 226148_at   | ZBTB44    | zinc finger and BTB domain containing 44                                                        | -0.4391 | 0.0085 |
| 226169_at   | SBF2      | SET binding factor 2                                                                            | -0.6684 | 0.0171 |
| 226190_at   |           | Homo sapiens; clone IMAGE:4294444; mRNA                                                         | -0.7639 | 0.0158 |
| 226201_at   |           | MRNA; cDNA DKFZp586P1823 (from clone DKFZp586P1823)                                             | -0.9822 | 0.0042 |
| 226207_at   | FLJ39378  | hypothetical protein FLJ39378                                                                   | -0.8274 | 0.0307 |
| 226222_at   | KIAA1432  | KIAA1432                                                                                        | -0.4885 | 0.008  |
| 226245_at   | KCTD1     | potassium channel tetramerisation domain containing 1                                           | -1.1551 | 0.0261 |
| 226250_at   |           | CDNA FLJ34585 fis; clone KIDNE2008758                                                           | -0.8791 | 0.0478 |
| 226252_at   |           | CDNA FLJ34585 fis; clone KIDNE2008758                                                           | -1.1503 | 0.0205 |
| 226275_at   | MXD1      | MAX dimerization protein 1                                                                      | -1.0288 | 0.0183 |
| 226277_at   |           | CDNA FLJ43397 fis; clone OCBBF2009788                                                           | -0.3768 | 0.0089 |
| 226285_at   | CAPRIN1   | cell cycle associated protein 1                                                                 | -0.6961 | 0.0292 |

|             |           |                                                                                                                                                                                                                                                                                                                                                                                                                              |         |        |
|-------------|-----------|------------------------------------------------------------------------------------------------------------------------------------------------------------------------------------------------------------------------------------------------------------------------------------------------------------------------------------------------------------------------------------------------------------------------------|---------|--------|
| 226291_at   | ALS2      | amyotrophic lateral sclerosis 2 (juvenile)                                                                                                                                                                                                                                                                                                                                                                                   | -1.1936 | 0.0321 |
| 226303_at   | PGM5      | phosphoglucomutase 5                                                                                                                                                                                                                                                                                                                                                                                                         | -1.7116 | 0.0366 |
| 226326_at   | PCGF5     | polycomb group ring finger 5                                                                                                                                                                                                                                                                                                                                                                                                 | -0.8221 | 0.0373 |
| 226327_at   | ZNF507    | zinc finger protein 507                                                                                                                                                                                                                                                                                                                                                                                                      | -0.7061 | 0.013  |
| 226347_at   |           |                                                                                                                                                                                                                                                                                                                                                                                                                              | -1.157  | 0.0037 |
| 226348_at   |           |                                                                                                                                                                                                                                                                                                                                                                                                                              | -1.3134 | 0.0107 |
| 226377_at   |           | Transcribed locus                                                                                                                                                                                                                                                                                                                                                                                                            | -0.8497 | 0.0203 |
| 226381_at   | PS1TP4    | HBV preS1-transactivated protein 4                                                                                                                                                                                                                                                                                                                                                                                           | -0.6305 | 0.026  |
| 226383_at   | C11orf46  | chromosome 11 open reading frame 46                                                                                                                                                                                                                                                                                                                                                                                          | -0.4742 | 0.0356 |
| 226390_at   | STARD4    | StAR-related lipid transfer (START) domain containing 4                                                                                                                                                                                                                                                                                                                                                                      | -1.4471 | 0.0428 |
| 226398_s_at | C10orf4   | chromosome 10 open reading frame 4                                                                                                                                                                                                                                                                                                                                                                                           | -0.6382 | 0.0298 |
| 226412_at   | SFRS18    | splicing factor; arginine/serine-rich 18                                                                                                                                                                                                                                                                                                                                                                                     | -0.9788 | 0.0008 |
| 226427_s_at | B3GALT6   | UDP-Gal:betaGal beta 1;3-galactosyltransferase polypeptide 6                                                                                                                                                                                                                                                                                                                                                                 | -0.1283 | 0.0254 |
| 226431_at   | ALS2CR13  | amyotrophic lateral sclerosis 2 (juvenile) chromosome region; candidate 13                                                                                                                                                                                                                                                                                                                                                   | -1.2351 | 0.0105 |
| 226446_at   | HES6      | hairy and enhancer of split 6 (Drosophila)                                                                                                                                                                                                                                                                                                                                                                                   | -2.6216 | 0.0092 |
| 226452_at   | PDK1      | pyruvate dehydrogenase kinase; isozyme 1                                                                                                                                                                                                                                                                                                                                                                                     | -1.2645 | 0.0089 |
| 226465_s_at | SON       | SON DNA binding protein                                                                                                                                                                                                                                                                                                                                                                                                      | -0.4413 | 0.0196 |
| 226470_at   | GGTL3     | gamma-glutamyltransferase-like 3                                                                                                                                                                                                                                                                                                                                                                                             | -0.9605 | 0.0335 |
| 226485_at   |           | CDNA FLJ37658 fis; clone BRHIP2010593                                                                                                                                                                                                                                                                                                                                                                                        | -1.1384 | 0.0088 |
| 226503_at   | RIF1      | RAP1 interacting factor homolog (yeast)                                                                                                                                                                                                                                                                                                                                                                                      | -0.9304 | 0.0099 |
| 226512_at   | ZMYM2     | zinc finger; MYM-type 2                                                                                                                                                                                                                                                                                                                                                                                                      | -0.8332 | 0.033  |
| 226520_at   |           | Primary neuroblastoma cDNA; clone:Nbla11485                                                                                                                                                                                                                                                                                                                                                                                  | -0.7734 | 0.0249 |
| 226555_at   | FLJ20309  | hypothetical protein FLJ20309                                                                                                                                                                                                                                                                                                                                                                                                | -0.6736 | 0.0345 |
| 226563_at   | SMAD2     | SMAD family member 2                                                                                                                                                                                                                                                                                                                                                                                                         | -1.4749 | 0.0045 |
| 226575_at   | ZNF462    | zinc finger protein 462                                                                                                                                                                                                                                                                                                                                                                                                      | -0.5918 | 0.0251 |
| 226590_at   | ZNF618    | zinc finger protein 618                                                                                                                                                                                                                                                                                                                                                                                                      | -1.184  | 0.0016 |
| 226592_at   | ZNF618    | zinc finger protein 618                                                                                                                                                                                                                                                                                                                                                                                                      | -1.6061 | 0.0001 |
| 226625_at   |           |                                                                                                                                                                                                                                                                                                                                                                                                                              | -1.2918 | 0.0479 |
| 226639_at   | SFT2D3    | SFT2 domain containing 3                                                                                                                                                                                                                                                                                                                                                                                                     | -0.7115 | 0.0261 |
| 226662_at   |           | Full-length cDNA clone CS0DB009YL20 of Neuroblastoma Cot 10-normalized of Homo sapiens (human)                                                                                                                                                                                                                                                                                                                               | -0.7507 | 0.0476 |
| 226676_at   | ZNF521    | zinc finger protein 521                                                                                                                                                                                                                                                                                                                                                                                                      | -1.431  | 0.0402 |
| 226679_at   | SLC26A11  | solute carrier family 26; member 11                                                                                                                                                                                                                                                                                                                                                                                          | -0.7235 | 0.0237 |
| 226682_at   | LOC283666 | hypothetical protein LOC283666                                                                                                                                                                                                                                                                                                                                                                                               | -1.8387 | 0.0047 |
| 226687_at   | PRPF40A   | PRP40 pre-mRNA processing factor 40 homolog A (S. cerevisiae)                                                                                                                                                                                                                                                                                                                                                                | -0.7401 | 0.0361 |
| 226729_at   | USP37     | ubiquitin specific peptidase 37                                                                                                                                                                                                                                                                                                                                                                                              | -0.5506 | 0.0194 |
| 226731_at   | PELO      | Pelota homolog (Drosophila)                                                                                                                                                                                                                                                                                                                                                                                                  | -1.9448 | 0.0026 |
| 226740_x_at | LOC728980 | hypothetical protein LOC728980, hypothetical protein LOC730476, neuroblastoma breakpoint family; member 1, neuroblastoma breakpoint family; member 10, neuroblastoma breakpoint family; member 11, neuroblastoma breakpoint family; member 14, neuroblastoma breakpoint family; member 15, neuroblastoma breakpoint family; member 16, neuroblastoma breakpoint family; member 20, neuroblastoma breakpoint family; member 8 | -0.4621 | 0.0097 |
| 226753_at   | FAM76B    | family with sequence similarity 76; member B                                                                                                                                                                                                                                                                                                                                                                                 | -0.9345 | 0.0076 |
| 226765_at   | SPTBN1    | Spectrin; beta; non-erythrocytic 1                                                                                                                                                                                                                                                                                                                                                                                           | -0.4738 | 0.0429 |
| 226797_at   |           | MRNA; cDNA DKFZp434G0972 (from clone DKFZp434G0972)                                                                                                                                                                                                                                                                                                                                                                          | -0.7435 | 0.0293 |
| 226828_s_at | HEYL      | hairy/enhancer-of-split related with YRPW motif-like                                                                                                                                                                                                                                                                                                                                                                         | -0.8627 | 0.0166 |
| 226866_at   | ESCO1     | establishment of cohesion 1 homolog 1 (S. cerevisiae)                                                                                                                                                                                                                                                                                                                                                                        | -0.9616 | 0.0393 |
| 226895_at   | NFIC      | Nuclear factor I/C (CCAAT-binding transcription factor)                                                                                                                                                                                                                                                                                                                                                                      | -0.5669 | 0.0092 |
| 226913_s_at | SOX8      | SRY (sex determining region Y)-box 8                                                                                                                                                                                                                                                                                                                                                                                         | -2.3771 | 0.0152 |
| 226945_at   | RHBDD1    | rhomboid domain containing 1                                                                                                                                                                                                                                                                                                                                                                                                 | -0.7324 | 0.0359 |
| 226969_at   | LOC149448 | 5-methyltetrahydrofolate-homocysteine methyltransferase, hypothetical protein LOC149448                                                                                                                                                                                                                                                                                                                                      | -1.0799 | 0.0023 |
| 226978_at   | PPARA     | peroxisome proliferator-activated receptor alpha                                                                                                                                                                                                                                                                                                                                                                             | -1.016  | 0.047  |

|             |           |                                                                                                                                              |         |        |
|-------------|-----------|----------------------------------------------------------------------------------------------------------------------------------------------|---------|--------|
| 226995_at   | C21orf86  | Chromosome 21 open reading frame 86                                                                                                          | -1.0867 | 0.032  |
| 227082_at   |           | MRNA; cDNA DKFZp586K1922 (from clone DKFZp586K1922)                                                                                          | -1.4085 | 0.0272 |
| 227088_at   | PDE5A     | phosphodiesterase 5A; cGMP-specific                                                                                                          | -1.972  | 0.0083 |
| 227121_at   |           | MRNA; cDNA DKFZp586K1922 (from clone DKFZp586K1922)                                                                                          | -1.1394 | 0.0216 |
| 227146_at   | QSOX2     | quiescin Q6 sulfhydryl oxidase 2                                                                                                             | -0.9949 | 0.0408 |
| 227162_at   | ZBTB26    | zinc finger and BTB domain containing 26                                                                                                     | -0.7611 | 0.0155 |
| 227164_at   | SFRS1     | splicing factor; arginine/serine-rich 1 (splicing factor 2; alternate splicing factor)                                                       | -0.6788 | 0.0293 |
| 227195_at   | ZNF503    | zinc finger protein 503                                                                                                                      | -1.8705 | 0.0077 |
| 227198_at   | AFF3      | AF4/FMR2 family; member 3                                                                                                                    | -3.4336 | 0.0066 |
| 227223_at   | LOC643167 | RNA binding motif protein 39, similar to RNA-binding region-containing protein 2 (Hepatocellular carcinoma protein 1) (Splicing factor HCC1) | -1.0499 | 0.049  |
| 227227_at   |           | CDNA FLJ32605 fis; clone STOMA1000175                                                                                                        | -0.8317 | 0.0292 |
| 227285_at   | C1orf51   | chromosome 1 open reading frame 51                                                                                                           | -1.1051 | 0.0356 |
| 227297_at   | ITGA9     | integrin; alpha 9                                                                                                                            | -2.0544 | 0.0043 |
| 227314_at   | ITGA2     | integrin; alpha 2 (CD49B; alpha 2 subunit of VLA-2 receptor)                                                                                 | -2.2113 | 0.0132 |
| 227337_at   | ANKRD37   | ankyrin repeat domain 37                                                                                                                     | -1.4999 | 0.0176 |
| 227368_at   |           | Transcribed locus; moderately similar to XP_001091208.1 hypothetical protein [Macaca mulatta]                                                | -1.9199 | 0.0086 |
| 227378_x_at | C16orf13  | chromosome 16 open reading frame 13                                                                                                          | -0.8925 | 0.0287 |
| 227383_at   | LOC727820 | hypothetical protein LOC727820                                                                                                               | -1.2476 | 0.0067 |
| 227400_at   | NFIX      | nuclear factor I/X (CCAAT-binding transcription factor)                                                                                      | -1.1985 | 0.0081 |
| 227422_at   |           |                                                                                                                                              | -0.7989 | 0.0312 |
| 227432_s_at |           | Transcribed locus; weakly similar to XP_512323.2 insulin receptor; partial [Pan troglodytes]                                                 | -0.8371 | 0.019  |
| 227449_at   | EPHA4     | EPH receptor A4                                                                                                                              | -1.8614 | 0.0282 |
| 227489_at   | SMURF2    | SMAD specific E3 ubiquitin protein ligase 2                                                                                                  | -0.825  | 0.0335 |
| 227501_at   |           | Transcribed locus                                                                                                                            | -1.4078 | 0.0443 |
| 227573_s_at | OBSL1     | obscurin-like 1                                                                                                                              | -0.562  | 0.0451 |
| 227574_at   | OBSL1     | obscurin-like 1                                                                                                                              | -1.0088 | 0.0169 |
| 227585_at   |           |                                                                                                                                              | -0.6545 | 0.0205 |
| 227603_at   |           | CDNA FLJ41385 fis; clone BRCAN2022191                                                                                                        | -0.6297 | 0.0299 |
| 227621_at   | WTAP      | Wilms tumor 1 associated protein                                                                                                             | -0.5698 | 0.0359 |
| 227622_at   | PCF11     | PCF11; cleavage and polyadenylation factor subunit; homolog (S. cerevisiae)                                                                  | -0.864  | 0.007  |
| 227648_at   | C22orf32  | chromosome 22 open reading frame 32                                                                                                          | -0.3006 | 0.0396 |
| 227751_at   | PDCD5     | Programmed cell death 5                                                                                                                      | -0.9549 | 0.0075 |
| 227771_at   | LIFR      | leukemia inhibitory factor receptor alpha                                                                                                    | -1.6808 | 0.0202 |
| 227793_at   |           |                                                                                                                                              | -0.9291 | 0.0221 |
| 227856_at   | C4orf32   | chromosome 4 open reading frame 32                                                                                                           | -1.1206 | 0.0464 |
| 227872_at   | POLR3A    | polymerase (RNA) III (DNA directed) polypeptide A; 155kDa                                                                                    | -0.3779 | 0.0331 |
| 227884_at   | TAF15     | TAF15 RNA polymerase II; TATA box binding protein (TBP)-associated factor; 68kDa                                                             | -1.1584 | 0.0393 |
| 227939_s_at | TRA2A     | Transformer-2 alpha                                                                                                                          | -0.1203 | 0.009  |
| 227971_at   | NRK       | Nik related kinase                                                                                                                           | -3.0402 | 0.0094 |
| 227973_at   | FLJ38973  | hypothetical protein FLJ38973                                                                                                                | -0.4665 | 0.0296 |
| 227984_at   | LOC650392 | Hypothetical protein LOC650392                                                                                                               | -2.7044 | 0.0083 |
| 227987_at   | VPS13A    | vacuolar protein sorting 13 homolog A (S. cerevisiae)                                                                                        | -1.1815 | 0.0076 |
| 227988_s_at | VPS13A    | vacuolar protein sorting 13 homolog A (S. cerevisiae)                                                                                        | -1.082  | 0.0014 |
| 227996_at   | FARP1     | FERM; RhoGEF (ARHGEF) and pleckstrin domain protein 1 (chondrocyte-derived)                                                                  | -2.0409 | 0.0344 |
| 228007_at   | C6orf204  | chromosome 6 open reading frame 204                                                                                                          | -0.832  | 0.0048 |
| 228020_at   | PTCD3     | Pentatricopeptide repeat domain 3                                                                                                            | -0.7941 | 0.039  |
| 228040_at   | LOC728903 | family with sequence similarity 88; member B, hypothetical protein LOC728903                                                                 | -1.2766 | 0.0184 |
| 228075_x_at | TFB1M     | transcription factor B1; mitochondrial                                                                                                       | -0.8911 | 0.0089 |

|             |           |                                                                                                |         |        |
|-------------|-----------|------------------------------------------------------------------------------------------------|---------|--------|
| 228091_at   |           | Full-length cDNA clone CS0DB009YL20 of Neuroblastoma Cot 10-normalized of Homo sapiens (human) | -0.8753 | 0.0091 |
| 228098_s_at | MYLIP     | myosin regulatory light chain interacting protein                                              | -1.4476 | 0.0331 |
| 228105_at   |           | Transcribed locus                                                                              | -1.2308 | 0.0235 |
| 228116_at   |           | Clone IMAGE:120162 mRNA sequence                                                               | -1.6202 | 0.0311 |
| 228119_at   | LRCH3     | leucine-rich repeats and calponin homology (CH) domain containing 3                            | -0.2672 | 0.029  |
| 228121_at   | TGFB2     | transforming growth factor; beta 2                                                             | -1.9827 | 0.0057 |
| 228125_at   |           | MRNA; cDNA DKFZp686P1116 (from clone DKFZp686P1116)                                            | -0.6096 | 0.0358 |
| 228127_at   |           | CDNA FLJ41679 fis; clone HCASM2003212                                                          | -1.5106 | 0.0221 |
| 228148_at   | ZNF584    | zinc finger protein 584                                                                        | -0.5146 | 0.0269 |
| 228156_at   |           | Homo sapiens; clone IMAGE:4346533; mRNA                                                        | -1.3125 | 0.0027 |
| 228157_at   | ZNF207    | zinc finger protein 207                                                                        | -1.1683 | 0.0415 |
| 228171_s_at | PLEKHG4   | pleckstrin homology domain containing; family G (with RhoGef domain) member 4                  | -2.1452 | 0.0042 |
| 228173_at   | GNAS      | GNAS complex locus                                                                             | -0.9854 | 0.0188 |
| 228180_at   |           | Transcribed locus                                                                              | -1.4401 | 0.0027 |
| 228181_at   | SLC30A1   | solute carrier family 30 (zinc transporter); member 1                                          | -1.5223 | 0.0419 |
| 228240_at   |           | Full-length cDNA clone CS0DM002YA18 of Fetal liver of Homo sapiens (human)                     | -1.0136 | 0.0103 |
| 228248_at   | RICTOR    | rapamycin-insensitive companion of mTOR                                                        | -0.7035 | 0.0022 |
| 228278_at   | NFIX      | nuclear factor IX (CCAAT-binding transcription factor)                                         | -0.474  | 0.0038 |
| 228284_at   | TLE1      | transducin-like enhancer of split 1 (E(sp1) homolog; Drosophila)                               | -1.5313 | 0.0068 |
| 228454_at   | LCOR      | ligand dependent nuclear receptor corepressor                                                  | -0.9559 | 0.0028 |
| 228479_at   | SOAT1     | sterol O-acyltransferase (acyl-Coenzyme A: cholesterol acyltransferase) 1                      | -0.7055 | 0.0345 |
| 228480_at   | VAPA      | VAMP (vesicle-associated membrane protein)-associated protein A; 33kDa                         | -1.7342 | 0.0066 |
| 228512_at   | PTCD3     | Pentatricopeptide repeat domain 3                                                              | -0.7953 | 0.0232 |
| 228515_at   | LOC90784  | hypothetical protein LOC90784                                                                  | -0.9605 | 0.0186 |
| 228527_s_at | SLC25A37  | Solute carrier family 25; member 37                                                            | -0.2423 | 0.0157 |
| 228545_at   | ZNF148    | zinc finger protein 148                                                                        | -0.6707 | 0.0154 |
| 228553_at   | ENAH      | Enabled homolog (Drosophila)                                                                   | -0.1158 | 0.0045 |
| 228554_at   |           | MRNA; cDNA DKFZp586G0321 (from clone DKFZp586G0321)                                            | -2.1009 | 0.0136 |
| 228562_at   |           | Transcribed locus                                                                              | -1.1246 | 0.003  |
| 228566_at   | P15RS     | Hypothetical protein FLJ10656                                                                  | -1.1548 | 0.0133 |
| 228590_at   | PTCD3     | Pentatricopeptide repeat domain 3                                                              | -0.7447 | 0.0083 |
| 228605_at   |           | CDNA FLJ30010 fis; clone 3NB692000154                                                          | -1.0176 | 0.0101 |
| 228642_at   | HOXA2     | Homeobox A2                                                                                    | -1.2664 | 0.023  |
| 228650_at   |           | CDNA FLJ38469 fis; clone FEBRA2021892                                                          | -0.4148 | 0.0428 |
| 228656_at   | PROX1     | Prospero homeobox 1                                                                            | -2.0298 | 0.001  |
| 228673_s_at | EML4      | Echinoderm microtubule associated protein like 4                                               | -0.1244 | 0.0395 |
| 228740_at   |           | CDNA clone IMAGE:5276765                                                                       | -1.8975 | 0.0249 |
| 228834_at   | TOB1      | transducer of ERBB2; 1                                                                         | -1.8732 | 0.021  |
| 228839_s_at | LOC439994 | hypothetical LOC642361, hypothetical gene supported by AF064843; AK025716                      | -0.658  | 0.0185 |
| 228879_at   |           |                                                                                                | -1.0287 | 0.0086 |
| 228906_at   | CXXC6     | CXXC finger 6                                                                                  | -1.2523 | 0.0247 |
| 228908_s_at | C21orf86  | Chromosome 21 open reading frame 86                                                            | -1.0997 | 0.0295 |
| 228909_at   | C21orf86  | Chromosome 21 open reading frame 86                                                            | -1.1065 | 0.0137 |
| 228915_at   | DACH1     | dachshund homolog 1 (Drosophila)                                                               | -2.244  | 0.0274 |
| 228927_at   | ZNF397    | zinc finger protein 397                                                                        | -0.8431 | 0.0049 |
| 228931_at   | COQ4      | coenzyme Q4 homolog (S. cerevisiae)                                                            | -1.1066 | 0.0221 |
| 228933_at   | NHS       | Nance-Horan syndrome (congenital cataracts and dental anomalies)                               | -1.3094 | 0.0176 |
| 228940_at   | LOC727762 | similar to NADH dehydrogenase (ubiquinone) 1 beta subcomplex; 4; 15kDa                         | -0.7234 | 0.0437 |
| 228948_at   | EPHA4     | EPH receptor A4                                                                                | -1.2577 | 0.036  |

|             |           |                                                                                                                            |         |        |
|-------------|-----------|----------------------------------------------------------------------------------------------------------------------------|---------|--------|
| 228988_at   | ZNF711    | zinc finger protein 711                                                                                                    | -2.3289 | 0.048  |
| 229015_at   | LOC286367 | FP944                                                                                                                      | -1.032  | 0.0084 |
| 229016_s_at | TRERF1    | transcriptional regulating factor 1                                                                                        | -0.2766 | 0.0424 |
| 229036_at   | TNRC6B    | trinucleotide repeat containing 6B                                                                                         | -0.3723 | 0.0349 |
| 229063_s_at | CCDC107   | coiled-coil domain containing 107                                                                                          | -0.5942 | 0.0149 |
| 229141_at   | WDR33     | WD repeat domain 33                                                                                                        | -0.7871 | 0.0201 |
| 229144_at   |           | Transcribed locus                                                                                                          | -2.1547 | 0.0043 |
| 229145_at   | C10orf104 | chromosome 10 open reading frame 104                                                                                       | -0.8492 | 0.0131 |
| 229187_at   | ZNF542    | CDNA FLJ45377 fis; clone BRHIP3019956, Zinc finger protein 542                                                             | -0.2532 | 0.0399 |
| 229193_at   |           | CDNA FLJ33355 fis; clone BRACE2005151                                                                                      | -0.954  | 0.0049 |
| 229194_at   | PCGF5     | polycomb group ring finger 5                                                                                               | -0.8738 | 0.0398 |
| 229198_at   | USP35     | ubiquitin specific peptidase 35                                                                                            | -1.0262 | 0.0303 |
| 229269_x_at | LOC646044 | similar to single stranded DNA binding protein 4 isoform a, single stranded DNA binding protein 4                          | -0.7577 | 0.0151 |
| 229272_at   | FNBP4     | formin binding protein 4                                                                                                   | -1.5417 | 0.0009 |
| 229325_at   | ZZZ3      | zinc finger; ZZ-type containing 3                                                                                          | -0.6974 | 0.0463 |
| 229371_at   |           | MRNA; cDNA DKFZp666B189 (from clone DKFZp666B189)                                                                          | -0.8764 | 0.0126 |
| 229376_at   |           |                                                                                                                            | -1.5153 | 0.0058 |
| 229425_at   |           | Transcribed locus                                                                                                          | -0.4302 | 0.0024 |
| 229447_x_at | NBPF11    | neuroblastoma breakpoint family; member 11                                                                                 | -0.4706 | 0.0154 |
| 229460_at   |           | CDNA FLJ37917 fis; clone CTONG1000137                                                                                      | -1.0278 | 0.0069 |
| 229462_at   |           |                                                                                                                            | -0.1172 | 0.0383 |
| 229481_at   | LOC283859 | hypothetical protein LOC283859                                                                                             | -0.3751 | 0.0325 |
| 229516_at   | WDR31     | WD repeat domain 31                                                                                                        | -0.4762 | 0.0075 |
| 229571_at   |           | Transcribed locus                                                                                                          | -0.2647 | 0.012  |
| 229576_s_at | TBX3      | T-box 3 (ulnar mammary syndrome)                                                                                           | -1.533  | 0.0191 |
| 229626_at   | LOC387856 | similar to expressed sequence AI836003                                                                                     | -1.5269 | 0.0067 |
| 229627_at   | KIAA1529  | KIAA1529                                                                                                                   | -0.2002 | 0.0219 |
| 229628_s_at | KIAA1529  | KIAA1529                                                                                                                   | -0.4422 | 0.0151 |
| 229638_at   | IRX3      | iroquois homeobox 3                                                                                                        | -1.5673 | 0.0322 |
| 229656_s_at | FLJ42562  | similar to echinoderm microtubule associated protein like 5                                                                | -2.3422 | 0.0033 |
| 229705_at   |           | Transcribed locus                                                                                                          | -1.093  | 0.0169 |
| 229710_at   |           | Transcribed locus                                                                                                          | -0.6514 | 0.0218 |
| 229736_at   | TMEM86B   | transmembrane protein 86B                                                                                                  | -0.371  | 0.0035 |
| 229741_at   | MGC3260   | Hypothetical protein MGC3260                                                                                               | -0.4995 | 0.0324 |
| 229765_at   |           | Transcribed locus                                                                                                          | -1.1827 | 0.002  |
| 229799_s_at | NCAM1     | neural cell adhesion molecule 1                                                                                            | -0.1371 | 0.0271 |
| 229841_at   |           | Transcribed locus                                                                                                          | -0.5833 | 0.0165 |
| 229879_at   |           | Transcribed locus                                                                                                          | -1.5396 | 0.0461 |
| 229897_at   | ZNF641    | Zinc finger protein 641                                                                                                    | -0.997  | 0.0445 |
| 229909_at   | B4GALNT3  | beta-1,4-N-acetyl-galactosaminyl transferase 3                                                                             | -0.8919 | 0.0398 |
| 229911_at   | TPM2      | tropomyosin 2 (beta)                                                                                                       | -0.3203 | 0.0176 |
| 229953_x_at | LCA5      | Leber congenital amaurosis 5                                                                                               | -0.4477 | 0.0083 |
| 229982_at   | QSER1     | glutamine and serine rich 1                                                                                                | -0.7652 | 0.0333 |
| 230007_at   | JMJD1C    | jumonji domain containing 1C                                                                                               | -0.1262 | 0.0455 |
| 230058_at   | SDCCAG3   | serologically defined colon cancer antigen 3                                                                               | -0.5958 | 0.0181 |
| 230082_at   |           | Transcribed locus; weakly similar to XP_001088736.1 similar to NEDD8-conjugating enzyme [Macaca mulatta]                   | -1.067  | 0.0059 |
| 230097_at   | GART      | Phosphoribosylglycinamide formyltransferase; phosphoribosylglycinamide synthetase; phosphoribosylaminoimidazole synthetase | -1.4384 | 0.0114 |
| 230099_at   |           | Transcribed locus                                                                                                          | -1.5722 | 0.0043 |
| 230102_at   | ETV5      | Ets variant gene 5 (ets-related molecule)                                                                                  | -1.1905 | 0.015  |
| 230133_at   | RC3H2     | ring finger and CCCH-type zinc finger domains 2                                                                            | -0.5038 | 0.032  |
| 230134_s_at | RC3H2     | ring finger and CCCH-type zinc finger domains 2                                                                            | -0.3795 | 0.0477 |
| 230186_at   | TMEM136   | transmembrane protein 136                                                                                                  | -0.3957 | 0.0342 |
| 230200_at   | NSUN6     | NOL1/NOP2/Sun domain family; member 6                                                                                      | -0.8857 | 0.0045 |
| 230229_at   | DLG1      | Discs; large homolog 1 (Drosophila)                                                                                        | -1.6575 | 0.0382 |
| 230293_at   |           | MSTP088 (MST088)                                                                                                           | -0.1626 | 0.04   |

|             |           |                                                                                                                                                                                                                                                                                      |         |        |
|-------------|-----------|--------------------------------------------------------------------------------------------------------------------------------------------------------------------------------------------------------------------------------------------------------------------------------------|---------|--------|
| 230297_x_at | SYNGAP1   | synaptic Ras GTPase activating protein 1 homolog (rat), zinc finger and BTB domain containing 9                                                                                                                                                                                      | -0.2304 | 0.0365 |
| 230332_at   | ZCCHC7    | Zinc finger; CCHC domain containing 7                                                                                                                                                                                                                                                | -1.1972 | 0.0151 |
| 230337_at   | SOS1      | son of sevenless homolog 1 (Drosophila)                                                                                                                                                                                                                                              | -0.7471 | 0.046  |
| 230375_at   | SFRS18    | splicing factor; arginine/serine-rich 18                                                                                                                                                                                                                                             | -0.9375 | 0.0279 |
| 230409_at   |           | Transcribed locus                                                                                                                                                                                                                                                                    | -0.1448 | 0.0277 |
| 230424_at   | C5orf13   | chromosome 5 open reading frame 13                                                                                                                                                                                                                                                   | -1.8068 | 0.0115 |
| 230435_at   | LOC375190 | hypothetical LOC375190                                                                                                                                                                                                                                                               | -0.6663 | 0.0172 |
| 230440_at   | ZNF469    | zinc finger protein 469                                                                                                                                                                                                                                                              | -1.0077 | 0.0146 |
| 230491_at   |           | MRNA; cDNA DKFZp686J01116 (from clone DKFZp686J01116)                                                                                                                                                                                                                                | -0.8092 | 0.0116 |
| 230528_s_at | MGC2752   | hypothetical protein MGC2752                                                                                                                                                                                                                                                         | -0.7344 | 0.0029 |
| 230595_at   | LOC572558 | hypothetical locus LOC572558                                                                                                                                                                                                                                                         | -1.5628 | 0.0309 |
| 230688_at   |           | Clone IMAGE:238558; mRNA sequence                                                                                                                                                                                                                                                    | -0.9827 | 0.0413 |
| 230710_at   |           | CDNA FLJ41489 fis; clone BRTHA2004582                                                                                                                                                                                                                                                | -1.8012 | 0.0134 |
| 230712_at   | LOC730258 | neuroblastoma breakpoint family; member 1, neuroblastoma breakpoint family; member 15, neuroblastoma breakpoint family; member 3, neuroblastoma breakpoint family; member 8, region containing neuroblastoma breakpoint family; member 8; neuroblastoma breakpoint family; member 10 | -1.7689 | 0.0005 |
| 230715_at   | KIAA1729  | KIAA1729 protein                                                                                                                                                                                                                                                                     | -0.4949 | 0.0105 |
| 230739_at   | C18orf19  | chromosome 18 open reading frame 19                                                                                                                                                                                                                                                  | -1.1231 | 0.0114 |
| 230746_s_at | STC1      | Stanniocalcin 1                                                                                                                                                                                                                                                                      | -2.1452 | 0.0181 |
| 230764_at   |           | CDNA FLJ30669 fis; clone FCBBF1000684                                                                                                                                                                                                                                                | -1.1906 | 0.0397 |
| 230779_at   | TNRC6B    | trinucleotide repeat containing 6B                                                                                                                                                                                                                                                   | -0.9116 | 0.044  |
| 230821_at   | ZNF148    | zinc finger protein 148                                                                                                                                                                                                                                                              | -0.7708 | 0.0427 |
| 230827_at   |           | Transcribed locus; strongly similar to XP_001099397.1 similar to HBxAg transactivated protein 2 isoform 5 [Macaca mulatta]                                                                                                                                                           | -0.1546 | 0.0049 |
| 230868_at   |           | Transcribed locus                                                                                                                                                                                                                                                                    | -0.6985 | 0.0145 |
| 230882_at   | FLJ34048  | hypothetical protein FLJ34048                                                                                                                                                                                                                                                        | -0.7375 | 0.0203 |
| 230886_at   |           | Transcribed locus                                                                                                                                                                                                                                                                    | -1.2212 | 0.0027 |
| 230894_s_at |           | Transcribed locus                                                                                                                                                                                                                                                                    | -0.9291 | 0.0026 |
| 230904_at   | FSD1L     | fibronectin type III and SPRY domain containing 1-like                                                                                                                                                                                                                               | -0.7704 | 0.0093 |
| 230998_at   |           | Transcribed locus                                                                                                                                                                                                                                                                    | -1.0213 | 0.0357 |
| 231024_at   | LOC572558 | hypothetical locus LOC572558                                                                                                                                                                                                                                                         | -1.1711 | 0.0387 |
| 231040_at   |           | CDNA FLJ43172 fis; clone FCBBF3007242                                                                                                                                                                                                                                                | -2.489  | 0.0108 |
| 231075_x_at | RAPH1     | Ras association (RalGDS/AF-6) and pleckstrin homology domains 1                                                                                                                                                                                                                      | -0.8399 | 0.0032 |
| 231173_at   | LOC642732 | pyridine nucleotide-disulphide oxidoreductase domain 1, similar to CG10721-PA                                                                                                                                                                                                        | -0.448  | 0.0167 |
| 231205_at   |           |                                                                                                                                                                                                                                                                                      | -1.8581 | 0.0013 |
| 231220_at   | BRUNOL4   | bruno-like 4; RNA binding protein (Drosophila)                                                                                                                                                                                                                                       | -0.2948 | 0.0459 |
| 231235_at   | NKTR      | natural killer-tumor recognition sequence                                                                                                                                                                                                                                            | -0.63   | 0.0371 |
| 231252_at   | FLJ23861  | hypothetical protein FLJ23861                                                                                                                                                                                                                                                        | -1.0486 | 0.01   |
| 231439_at   |           | Full length insert cDNA clone ZD76G03                                                                                                                                                                                                                                                | -0.1725 | 0.0499 |
| 231449_at   |           | Transcribed locus                                                                                                                                                                                                                                                                    | -0.3194 | 0.0377 |
| 231468_at   |           |                                                                                                                                                                                                                                                                                      | -0.4952 | 0.0435 |
| 231486_x_at |           |                                                                                                                                                                                                                                                                                      | -0.1605 | 0.0133 |
| 231495_at   |           | Transcribed locus                                                                                                                                                                                                                                                                    | -0.2077 | 0.0307 |
| 231502_at   |           | Transcribed locus                                                                                                                                                                                                                                                                    | -0.9215 | 0.0055 |
| 231545_at   |           |                                                                                                                                                                                                                                                                                      | -0.1322 | 0.0163 |
| 231552_at   |           | Transcribed locus                                                                                                                                                                                                                                                                    | -1.0765 | 0.0046 |
| 231585_at   | VPS13A    | Vacuolar protein sorting 13 homolog A (S. cerevisiae)                                                                                                                                                                                                                                | -0.1864 | 0.0291 |
| 231716_at   | RC3H2     | ring finger and CCCH-type zinc finger domains 2                                                                                                                                                                                                                                      | -0.6847 | 0.0011 |
| 231818_x_at |           | MRNA; cDNA DKFZp666B189 (from clone DKFZp666B189)                                                                                                                                                                                                                                    | -0.2961 | 0.0203 |
| 231827_at   |           | Full length insert cDNA clone ZE04G11                                                                                                                                                                                                                                                | -0.3604 | 0.0485 |
| 231836_at   | HKR1      | GLI-Kruppel family member HKR1                                                                                                                                                                                                                                                       | -0.3882 | 0.0395 |
| 231848_x_at | ZNF207    | zinc finger protein 207                                                                                                                                                                                                                                                              | -0.9541 | 0.0296 |
| 231882_at   | FLJ39632  | hypothetical LOC642477                                                                                                                                                                                                                                                               | -1.8155 | 0.0284 |



|             |           |                                                                                                       |         |        |
|-------------|-----------|-------------------------------------------------------------------------------------------------------|---------|--------|
| 231952_at   | LOC731450 | hypothetical protein LOC731450                                                                        | -1.222  | 0.0157 |
| 231960_at   | BRWD1     | bromodomain and WD repeat domain containing 1                                                         | -0.7964 | 0.0203 |
| 232012_at   | CAPN1     | calpain 1; (mu/l) large subunit                                                                       | -0.6361 | 0.021  |
| 232020_at   | SMURF2    | SMAD specific E3 ubiquitin protein ligase 2                                                           | -0.6354 | 0.0459 |
| 232026_at   | HERC4     | hect domain and RLD 4                                                                                 | -0.4534 | 0.0442 |
| 232048_at   | FAM76B    | family with sequence similarity 76; member B                                                          | -0.5553 | 0.0182 |
| 232058_at   |           | CDNA FLJ13694 fis; clone PLACE2000115                                                                 | -1.7144 | 0.0021 |
| 232071_at   | MRPL19    | Mitochondrial ribosomal protein L19                                                                   | -0.9031 | 0.0077 |
| 232112_at   | RALGPS2   | Ral GEF with PH domain and SH3 binding motif 2                                                        | -0.4093 | 0.0477 |
| 232125_at   |           | CDNA FLJ12166 fis; clone MAMMA1000616                                                                 | -0.9697 | 0.0403 |
| 232138_at   | MBNL2     | Muscleblind-like 2 (Drosophila)                                                                       | -1.4673 | 0.0325 |
| 232144_at   |           | CDNA FLJ11405 fis; clone HEMBA1000769                                                                 | -1.8416 | 0.0011 |
| 232145_at   | LOC388969 | hypothetical LOC388969                                                                                | -0.8849 | 0.0266 |
| 232163_at   | WDR19     | WD repeat domain 19                                                                                   | -0.372  | 0.0324 |
| 232174_at   |           | CDNA: FLJ21635 fis; clone COL08233; highly similar to AF131819 Homo sapiens clone 24838 mRNA sequence | -1.5815 | 0.0064 |
| 232180_at   | UGP2      | UDP-glucose pyrophosphorylase 2                                                                       | -1.0573 | 0.0232 |
| 232183_at   | SERAC1    | serine active site containing 1                                                                       | -0.7789 | 0.0415 |
| 232216_at   | YME1L1    | YME1-like 1 (S. cerevisiae)                                                                           | -0.9884 | 0.0311 |
| 232264_at   |           | CDNA FLJ12142 fis; clone MAMMA1000356                                                                 | -1.1249 | 0.0237 |
| 232286_at   |           | CDNA FLJ12187 fis; clone MAMMA1000831                                                                 | -1.8069 | 0.0248 |
| 232312_at   | SAPS3     | SAPS domain family; member 3                                                                          | -0.8825 | 0.0421 |
| 232356_at   |           | CDNA FLJ13539 fis; clone PLACE1006640                                                                 | -0.8703 | 0.0393 |
| 232363_at   |           | CDNA: FLJ20863 fis; clone ADKA01804                                                                   | -0.6432 | 0.0214 |
| 232365_at   | SIAH1     | seven in absentia homolog 1 (Drosophila)                                                              | -0.407  | 0.0025 |
| 232369_at   |           | Clone IMAGE:119716; mRNA sequence                                                                     | -1.4985 | 0.0355 |
| 232371_at   | 7-Mar     | Membrane-associated ring finger (C3HC4) 7                                                             | -0.8086 | 0.0137 |
| 232376_at   | PCCA      | Propionyl Coenzyme A carboxylase; alpha polypeptide                                                   | -0.4356 | 0.0071 |
| 232392_at   | SFRS3     | Splicing factor; arginine/serine-rich 3                                                               | -1.3136 | 0.0238 |
| 232393_at   | ZNF462    | zinc finger protein 462                                                                               | -0.3243 | 0.0046 |
| 232410_at   |           | MRNA differentially expressed from human RPE cell in differential display experiment                  | -0.3286 | 0.0118 |
| 232440_at   | ZDHHC13   | Zinc finger; DHHC-type containing 13                                                                  | -0.4038 | 0.0493 |
| 232441_at   | KRR1      | KRR1; small subunit (SSU) processome component; homolog (yeast)                                       | -1.0872 | 0.0234 |
| 232454_at   |           | MRNA; cDNA DKFZp586N2224 (from clone DKFZp586N2224)                                                   | -0.2158 | 0.0447 |
| 232455_x_at | LOC340085 | hypothetical protein LOC340085                                                                        | -0.3091 | 0.0325 |
| 232465_at   |           | CDNA FLJ11687 fis; clone HEMBA1004960                                                                 | -0.3358 | 0.0146 |
| 232472_at   |           | CDNA FLJ12399 fis; clone MAMMA1002780                                                                 | -1.1172 | 0.0053 |
| 232477_at   |           |                                                                                                       | -0.1338 | 0.0212 |
| 232478_at   |           | CDNA clone IMAGE:4815026                                                                              | -1.6294 | 0.004  |
| 232480_at   | FLJ27365  | FLJ27365 protein                                                                                      | -0.266  | 0.0392 |
| 232516_x_at | YY1AP1    | YY1 associated protein 1                                                                              | -0.2646 | 0.0152 |
| 232522_at   |           | CDNA FLJ33679 fis; clone BRAWH2002352                                                                 | -0.7673 | 0.0189 |
| 232576_at   |           | CDNA FLJ11519 fis; clone HEMBA1002348                                                                 | -0.568  | 0.0168 |
| 232582_at   |           | CDNA FLJ12128 fis; clone MAMMA1000175                                                                 | -0.6013 | 0.0403 |
| 232599_at   | EXOC6     | exocyst complex component 6                                                                           | -0.5144 | 0.0035 |
| 232615_at   |           | CDNA: FLJ22765 fis; clone KAIA1180                                                                    | -1.157  | 0.0204 |
| 232626_at   |           | CDNA FLJ14143 fis; clone MAMMA1002892                                                                 | -0.6956 | 0.0001 |
| 232628_at   |           | CDNA FLJ13464 fis; clone PLACE1003478                                                                 | -1.2024 | 0.0492 |
| 232637_at   | 2-Sep     | Septin 2                                                                                              | -0.6118 | 0.0389 |
| 232681_at   |           | CDNA: FLJ23242 fis; clone COL01514                                                                    | -0.5969 | 0.0454 |
| 232685_at   |           | CDNA: FLJ21564 fis; clone COL06452                                                                    | -0.5873 | 0.0122 |
| 232704_s_at | LRRFIP2   | leucine rich repeat (in FLII) interacting protein 2                                                   | -0.439  | 0.0255 |
| 232705_at   | LRRFIP2   | Leucine rich repeat (in FLII) interacting protein 2                                                   | -0.1899 | 0.0299 |
| 232744_x_at |           | CDNA FLJ11681 fis; clone HEMBA1004865                                                                 | -1.0826 | 0.0189 |
| 232750_at   | TNS1      | Tensin 1                                                                                              | -1.276  | 0.0231 |
| 232754_at   |           | CDNA FLJ11563 fis; clone HEMBA1003202                                                                 | -0.1243 | 0.038  |
| 232757_at   |           | CDNA FLJ12372 fis; clone MAMMA1002446                                                                 | -0.6887 | 0.0049 |
| 232759_at   |           |                                                                                                       | -1.0647 | 0.0127 |

|             |           |                                                                                                          |         |        |
|-------------|-----------|----------------------------------------------------------------------------------------------------------|---------|--------|
| 232773_at   |           | CDNA: FLJ21440 fis; clone COL04389                                                                       | -1.4598 | 0.0122 |
| 232776_at   |           | CDNA FLJ11646 fis; clone HEMBA1004394                                                                    | -0.7511 | 0.0218 |
| 232783_at   |           | CDNA FLJ13625 fis; clone PLACE1011032                                                                    | -0.2056 | 0.0035 |
| 232788_at   |           | CDNA FLJ11366 fis; clone HEMBA1000282                                                                    | -0.4694 | 0.0143 |
| 232795_at   |           | CDNA FLJ10145 fis; clone HEMBA1003322                                                                    | -0.2082 | 0.0015 |
| 232803_at   | FLJ31958  | hypothetical protein FLJ31958                                                                            | -0.4557 | 0.0007 |
| 232814_x_at | C14orf153 | Chromosome 14 open reading frame 153                                                                     | -0.3552 | 0.0465 |
| 232824_at   |           | CDNA FLJ10182 fis; clone HEMBA1004246                                                                    | -0.4198 | 0.0028 |
| 232826_at   |           | CDNA FLJ11400 fis; clone HEMBA1000673                                                                    | -0.3638 | 0.0239 |
| 232835_at   |           | Transcribed locus                                                                                        | -0.4056 | 0.0305 |
| 232852_at   |           | CDNA FLJ26156 fis; clone ADG01420, CDNA FLJ26775 fis; clone PRS03610, CDNA: FLJ21326 fis; clone COL02445 | -1.4406 | 0.0221 |
| 232858_at   |           | CDNA FLJ11927 fis; clone HEMBB1000402                                                                    | -0.2761 | 0.0125 |
| 232885_at   | LOC92482  | hypothetical protein LOC92482                                                                            | -0.4533 | 0.0096 |
| 232898_at   | DAB2      | disabled homolog 2; mitogen-responsive phosphoprotein (Drosophila)                                       | -3.305  | 0.0001 |
| 232901_at   | RARS2     | arginyl-tRNA synthetase 2; mitochondrial (putative)                                                      | -0.4845 | 0.0088 |
| 232914_s_at | SYTL2     | synaptotagmin-like 2                                                                                     | -2.1902 | 0.0459 |
| 232919_at   | AFG3L2    | AFG3 ATPase family gene 3-like 2 (yeast)                                                                 | -0.378  | 0.0028 |
| 232929_at   |           | CDNA FLJ13240 fis; clone OVARC1000496                                                                    | -0.7376 | 0.0177 |
| 232948_at   |           | CDNA FLJ12111 fis; clone MAMMA1000025                                                                    | -0.3549 | 0.0097 |
| 232952_at   |           | CDNA FLJ11942 fis; clone HEMBB1000652                                                                    | -0.3547 | 0.031  |
| 232962_x_at |           | CDNA FLJ34323 fis; clone FEBRA2008866                                                                    | -0.2113 | 0.0204 |
| 232978_at   |           | Clone IMAGE:27725; mRNA sequence                                                                         | -1.2438 | 0.0052 |
| 232980_at   |           | CDNA FLJ11854 fis; clone HEMBA1006767                                                                    | -0.3034 | 0.0438 |
| 232982_at   | AP1GBP1   | AP1 gamma subunit binding protein 1                                                                      | -0.115  | 0.0308 |
| 233003_at   |           | CDNA FLJ11942 fis; clone HEMBB1000652                                                                    | -0.8278 | 0.0028 |
| 233019_at   | CNOT7     | CCR4-NOT transcription complex; subunit 7                                                                | -0.833  | 0.0169 |
| 233035_at   |           | CDNA FLJ12023 fis; clone HEMBB1001785                                                                    | -0.4601 | 0.0427 |
| 233038_at   |           | CDNA: FLJ22776 fis; clone KAIA1582                                                                       | -0.238  | 0.0089 |
| 233040_at   | PLEKHA5   | pleckstrin homology domain containing; family A member 5                                                 | -0.4439 | 0.0059 |
| 233041_x_at |           | CDNA: FLJ21356 fis; clone COL02831                                                                       | -0.3234 | 0.0273 |
| 233055_at   |           | CDNA FLJ11510 fis; clone HEMBA1002185                                                                    | -1.9582 | 0.0025 |
| 233068_at   |           | CDNA FLJ13202 fis; clone NT2RP3004503                                                                    | -0.6046 | 0.05   |
| 233079_at   | MERTK     | c-mer proto-oncogene tyrosine kinase                                                                     | -1.1035 | 0.0163 |
| 233089_at   | QRSL1     | glutamyl-tRNA synthase (glutamine-hydrolyzing)-like 1                                                    | -0.5016 | 0.0372 |
| 233097_x_at |           | CDNA FLJ11133 fis; clone PLACE1006357                                                                    | -0.2731 | 0.008  |
| 233101_at   | MTMR9     | myotubularin related protein 9                                                                           | -0.5517 | 0.0148 |
| 233106_at   | C14orf82  | chromosome 14 open reading frame 82                                                                      | -0.4524 | 0.0421 |
| 233113_at   | LOC730057 | Hypothetical protein LOC730057                                                                           | -0.17   | 0.0092 |
| 233120_at   |           | CDNA FLJ13845 fis; clone THYRO1000815                                                                    | -0.1221 | 0.0436 |
| 233121_at   |           | CDNA FLJ12299 fis; clone MAMMA1001851                                                                    | -0.3299 | 0.02   |
| 233159_at   | STARD13   | START domain containing 13                                                                               | -0.1204 | 0.0376 |
| 233173_x_at | GTF3C5    | general transcription factor IIIC; polypeptide 5; 63kDa                                                  | -1.0573 | 0.0039 |
| 233191_at   | RUFY2     | RUN and FYVE domain containing 2                                                                         | -0.2266 | 0.035  |
| 233196_at   |           | CDNA FLJ11777 fis; clone HEMBA1005909                                                                    | -0.845  | 0.0264 |
| 233212_at   |           | CDNA FLJ41104 fis; clone BLADE2006607                                                                    | -0.1672 | 0.0237 |
| 233214_at   |           | CDNA FLJ11900 fis; clone HEMBA1007341                                                                    | -0.7603 | 0.0197 |
| 233225_at   |           | CDNA FLJ36087 fis; clone TESTI2020283                                                                    | -0.52   | 0.0153 |
| 233228_at   |           | CDNA: FLJ21229 fis; clone COL00740                                                                       | -0.7117 | 0.0203 |
| 233239_at   |           | CDNA: FLJ21229 fis; clone COL00740                                                                       | -0.2814 | 0.0486 |
| 233248_at   |           | CDNA FLJ11966 fis; clone HEMBB1001114                                                                    | -0.4024 | 0.0064 |
| 233249_at   | LOC730200 | Hypothetical protein LOC730200                                                                           | -1.9046 | 0.0411 |
| 233254_x_at | PTEN      | phosphatase and tensin homolog (mutated in multiple advanced cancers 1)                                  | -0.7788 | 0.0115 |
| 233257_at   |           | CDNA FLJ12368 fis; clone MAMMA1002417                                                                    | -2.2313 | 0.0007 |
| 233265_at   |           | CDNA FLJ12203 fis; clone MAMMA1000914                                                                    | -0.62   | 0.0198 |
| 233271_at   |           | CDNA FLJ11709 fis; clone HEMBA1005133                                                                    | -0.9117 | 0.0295 |
| 233273_at   |           | CDNA FLJ12010 fis; clone HEMBB1001635                                                                    | -1.1567 | 0.0177 |

|             |           |                                                                         |         |        |
|-------------|-----------|-------------------------------------------------------------------------|---------|--------|
| 233276_at   |           | CDNA FLJ11923 fis; clone HEMBB1000341                                   | -2.2158 | 0.0009 |
| 233288_at   | ATR       | ataxia telangiectasia and Rad3 related                                  | -0.5358 | 0.0041 |
| 233290_at   |           | CDNA FLJ11451 fis; clone HEMBA1001433                                   | -0.4673 | 0.0137 |
| 233296_x_at |           | CDNA FLJ12131 fis; clone MAMMA1000254                                   | -0.5403 | 0.0384 |
| 233300_at   |           | CDNA FLJ11548 fis; clone HEMBA1002944                                   | -1.2505 | 0.0004 |
| 233314_at   | PTEN      | phosphatase and tensin homolog (mutated in multiple advanced cancers 1) | -1.114  | 0.0288 |
| 233315_at   |           | CDNA: FLJ21294 fis; clone COL01981                                      | -0.4959 | 0.0212 |
| 233323_at   |           | CDNA: FLJ21320 fis; clone COL02324                                      | -0.5734 | 0.0439 |
| 233335_at   |           | MRNA; cDNA DKFZp586J1717 (from clone DKFZp586J1717)                     | -0.1447 | 0.0336 |
| 233336_at   | LOC142893 | hypothetical protein LOC142893                                          | -0.6272 | 0.0175 |
| 233358_at   | FLJ14311  | hypothetical gene FLJ14311                                              | -0.1386 | 0.0482 |
| 233367_at   |           | CDNA FLJ11566 fis; clone HEMBA1003273                                   | -0.6224 | 0.0206 |
| 233374_at   |           | CDNA: FLJ21297 fis; clone COL02035                                      | -0.2634 | 0.0063 |
| 233412_x_at |           | CDNA FLJ11849 fis; clone HEMBA1006709                                   | -0.2145 | 0.0091 |
| 233417_at   |           | CDNA FLJ11625 fis; clone HEMBA1004200                                   | -0.7269 | 0.0062 |
| 233425_at   | ZCCHC2    | zinc finger; CCHC domain containing 2                                   | -0.4716 | 0.0218 |
| 233427_x_at |           | CDNA FLJ13808 fis; clone THYRO1000253                                   | -0.2382 | 0.0429 |
| 233440_at   |           | CDNA FLJ12367 fis; clone MAMMA1002413                                   | -0.7874 | 0.0109 |
| 233442_at   |           | CDNA FLJ12196 fis; clone MAMMA1000867                                   | -1.5099 | 0.0226 |
| 233449_at   |           | CDNA FLJ11377 fis; clone HEMBA1000442                                   | -1.5138 | 0.0258 |
| 233468_at   |           | CDNA FLJ13434 fis; clone PLACE1002578                                   | -0.1439 | 0.003  |
| 233487_s_at | LRRC8A    | leucine rich repeat containing 8 family; member A                       | -0.4635 | 0.022  |
| 233504_at   | C9orf84   | chromosome 9 open reading frame 84                                      | -4.6403 | 0      |
| 233509_at   | HERC4     | hect domain and RLD 4                                                   | -0.1459 | 0.0101 |
| 233519_at   |           | Clone 23637 mRNA sequence                                               | -0.3625 | 0.0332 |
| 233539_at   | NAPE-PLD  | N-acyl-phosphatidylethanolamine-hydrolyzing phospholipase D             | -1.034  | 0.016  |
| 233570_at   |           | IMAGE:512024 clone; mRNA                                                | -0.4146 | 0.0297 |
| 233579_at   |           | CDNA: FLJ22749 fis; clone KAIA0458                                      | -0.2544 | 0.0136 |
| 233595_at   | USP34     | ubiquitin specific peptidase 34                                         | -1.6506 | 0.0063 |
| 233608_at   |           | CDNA FLJ11929 fis; clone HEMBB1000434                                   | -0.8137 | 0.0061 |
| 233626_at   |           | CDNA: FLJ20927 fis; clone ADSE01007                                     | -0.4599 | 0.0152 |
| 233664_at   |           | CDNA: FLJ22803 fis; clone KAIA2685                                      | -0.48   | 0.0123 |
| 233700_at   |           | CDNA: FLJ21638 fis; clone COL08269                                      | -0.286  | 0.0224 |
| 233713_at   |           | CDNA FLJ12119 fis; clone MAMMA1000092                                   | -1.8931 | 0.0186 |
| 233720_at   | SORBS2    | Sorbin and SH3 domain containing 2                                      | -1.7783 | 0.0056 |
| 233752_s_at | ZFX3      | zinc finger homeobox 3                                                  | -0.1365 | 0.0443 |
| 233753_at   | SFRS15    | splicing factor; arginine/serine-rich 15                                | -0.2538 | 0.0113 |
| 233775_x_at |           | CDNA FLJ13242 fis; clone OVARC1000578                                   | -0.435  | 0.0297 |
| 233788_at   |           | CDNA FLJ11617 fis; clone HEMBA1004045                                   | -0.2341 | 0.0008 |
| 233794_at   |           | CDNA FLJ10176 fis; clone HEMBA1004074                                   | -0.1271 | 0.0368 |
| 233824_at   |           | CDNA: FLJ21428 fis; clone COL04203                                      | -0.6973 | 0.0103 |
| 233836_at   | TNRC6A    | trinucleotide repeat containing 6A                                      | -0.3884 | 0.0022 |
| 233874_at   | SLAIN2    | SLAIN motif family; member 2                                            | -0.5502 | 0.0065 |
| 233914_s_at | SBF2      | SET binding factor 2                                                    | -0.8469 | 0.0135 |
| 233994_at   |           | Clone 24894 mRNA sequence                                               | -0.4963 | 0.0305 |
| 234032_at   |           | PRO1550                                                                 | -1.3331 | 0.0118 |
| 234034_at   |           | MRNA; cDNA DKFZp761F052 (from clone DKFZp761F052)                       | -1.9984 | 0.0428 |
| 234042_at   | TAS2R45   | taste receptor; type 2; member 45                                       | -0.6451 | 0.0108 |
| 234043_at   |           | CDNA FLJ11920 fis; clone HEMBB1000312                                   | -0.4351 | 0.0068 |
| 234078_at   | LOC730057 | Hypothetical protein LOC730057                                          | -0.2675 | 0.036  |
| 234093_at   | ZNF326    | zinc finger protein 326                                                 | -0.1579 | 0.0169 |
| 234098_at   | SOBP      | Sine oculis binding protein homolog (Drosophila)                        | -0.7956 | 0.0493 |
| 234105_at   |           | CDNA FLJ11473 fis; clone HEMBA1001712                                   | -0.7727 | 0.027  |
| 234122_at   |           | MRNA; cDNA DKFZp761B0823 (from clone DKFZp761B0823)                     | -0.2562 | 0.0118 |
| 234145_at   | PBX3      | pre-B-cell leukemia homeobox 3                                          | -0.1395 | 0.0181 |
| 234159_at   |           | CDNA: FLJ21529 fis; clone COL05981                                      | -0.2426 | 0.0447 |

|             |           |                                                                                   |         |        |
|-------------|-----------|-----------------------------------------------------------------------------------|---------|--------|
| 234162_at   |           | CDNA: FLJ22641 fis; clone HSI06942                                                | -0.1804 | 0.0427 |
| 234164_at   |           | CDNA: FLJ22006 fis; clone HEP06915                                                | -0.2131 | 0.0331 |
| 234211_at   |           | CDNA: FLJ21436 fis; clone COL04279                                                | -0.4057 | 0.0078 |
| 234227_at   |           | CDNA: FLJ21166 fis; clone CAS10851                                                | -0.1139 | 0.0418 |
| 234245_at   |           | MRNA; cDNA DKFZp761M2223 (from clone DKFZp761M2223)                               | -1.0679 | 0.0284 |
| 234247_at   |           | MRNA; cDNA DKFZp761D1723 (from clone DKFZp761D1723)                               | -0.1271 | 0.0365 |
| 234275_at   |           | MRNA; cDNA DKFZp586A131 (from clone DKFZp586A131)                                 | -0.1666 | 0.0475 |
| 234278_at   |           |                                                                                   | -0.7697 | 0.0141 |
| 234312_s_at | ACSS2     | acyl-CoA synthetase short-chain family member 2                                   | -1.1564 | 0.0415 |
| 234314_at   | C20orf74  | chromosome 20 open reading frame 74                                               | -3.206  | 0.0206 |
| 234326_at   |           | CDNA: FLJ21248 fis; clone COL01235                                                | -0.3568 | 0.0204 |
| 234335_s_at | FAM84A    | Family with sequence similarity 84; member A                                      | -0.1743 | 0.0125 |
| 234339_s_at | GLTSCR2   | glioma tumor suppressor candidate region gene 2                                   | -0.4939 | 0.0292 |
| 234360_at   |           |                                                                                   | -0.232  | 0.0415 |
| 234445_at   | C6orf12   | chromosome 6 open reading frame 12                                                | -0.4086 | 0.0151 |
| 234459_at   | PPHLN1    | periphilin 1                                                                      | -0.326  | 0.0419 |
| 234489_at   |           | CDNA FLJ11818 fis; clone HEMBA1006424                                             | -0.3209 | 0.001  |
| 234544_at   | ARHGEF12  | Rho guanine nucleotide exchange factor (GEF) 12                                   | -0.1529 | 0.0292 |
| 234548_at   |           | MRNA; cDNA DKFZp586J1824 (from clone DKFZp586J1824)                               | -0.1194 | 0.0282 |
| 234565_x_at |           | CDNA FLJ20846 fis; clone ADKA01802                                                | -0.2301 | 0.0248 |
| 234589_at   | TMEM106A  | Transmembrane protein 106A                                                        | -0.1393 | 0.0125 |
| 234601_x_at |           | CDNA: FLJ22732 fis; clone HSI15880                                                | -0.137  | 0.0357 |
| 234650_at   |           | CDNA: FLJ21254 fis; clone COL01317                                                | -0.8751 | 0.0246 |
| 234652_at   |           | Ntera2D1 cell line mRNA containing L1 retroposon; clone P1                        | -0.1314 | 0.0467 |
| 234677_at   |           | MRNA; cDNA DKFZp547K042 (from clone DKFZp547K042)                                 | -0.1481 | 0.0094 |
| 234949_at   | C20orf80  | Chromosome 20 open reading frame 80                                               | -0.7494 | 0.012  |
| 234967_at   | IL6ST     | interleukin 6 signal transducer (gp130; oncostatin M receptor)                    | -0.1332 | 0.0007 |
| 235013_at   | SLC31A1   | solute carrier family 31 (copper transporters); member 1                          | -0.7744 | 0.0335 |
| 235021_at   | KIAA2026  | KIAA2026                                                                          | -0.3671 | 0.0107 |
| 235031_at   |           | CDNA FLJ34195 fis; clone FCBBF3019320                                             | -0.559  | 0.0252 |
| 235078_at   |           | Transcribed locus                                                                 | -1.2498 | 0.0138 |
| 235105_at   |           | MRNA; cDNA DKFZp686F09227 (from clone DKFZp686F09227)                             | -0.1246 | 0.0363 |
| 235107_at   |           | Transcribed locus                                                                 | -1.1122 | 0.0336 |
| 235108_at   |           | CDNA FLJ41679 fis; clone HCASM2003212                                             | -1.6332 | 0.0471 |
| 235112_at   |           | Homo sapiens; Similar to RIKEN cDNA E130308A19 gene; clone IMAGE:6198463; mRNA    | -1.9479 | 0.0008 |
| 235132_at   | LOC254128 | hypothetical protein LOC254128                                                    | -0.6791 | 0.0254 |
| 235138_at   |           | Transcribed locus                                                                 | -1.0929 | 0.0213 |
| 235182_at   | C20orf82  | chromosome 20 open reading frame 82                                               | -3.469  | 0.0051 |
| 235190_at   |           | Transcribed locus                                                                 | -1.263  | 0.0036 |
| 235205_at   | LOC346887 | similar to solute carrier family 16 (monocarboxylic acid transporters); member 14 | -1.7626 | 0.0236 |
| 235226_at   | CDC2L6    | cell division cycle 2-like 6 (CDK8-like)                                          | -0.9745 | 0.0098 |
| 235287_at   | CDK6      | cyclin-dependent kinase 6                                                         | -0.8247 | 0.0254 |
| 235308_at   | ZBTB20    | zinc finger and BTB domain containing 20                                          | -0.9725 | 0.018  |
| 235328_at   | PLXNC1    | Plexin C1                                                                         | -0.6112 | 0.0059 |
| 235374_at   | MDH1      | Malate dehydrogenase 1; NAD (soluble)                                             | -1.0317 | 0.0028 |
| 235381_at   |           | Homo sapiens; clone IMAGE:3457110; mRNA                                           | -0.7321 | 0.0094 |
| 235392_at   |           | Transcribed locus                                                                 | -1.6558 | 0.0032 |
| 235471_at   | C10orf72  | Chromosome 10 open reading frame 72                                               | -1.6349 | 0.0293 |
| 235477_at   |           | Transcribed locus                                                                 | -0.2215 | 0.0153 |
| 235484_at   | PTAR1     | protein prenyltransferase alpha subunit repeat containing 1                       | -0.8603 | 0.0474 |
| 235493_at   |           | Transcribed locus                                                                 | -1.2145 | 0.0061 |

|             |           |                                                                                              |         |        |
|-------------|-----------|----------------------------------------------------------------------------------------------|---------|--------|
| 235501_at   |           | Clone IMAGE:609899; mRNA sequence                                                            | -2.0822 | 0.0403 |
| 235526_at   | SOX6      | SRY (sex determining region Y)-box 6                                                         | -1.0155 | 0.0059 |
| 235538_at   |           | CDNA FLJ30718 fis; clone FCBBF2001675                                                        | -2.2169 | 0.0004 |
| 235540_at   | GNRH1     | gonadotropin-releasing hormone 1 (luteinizing-releasing hormone)                             | -0.2483 | 0.048  |
| 235560_at   |           | MRNA; cDNA DKFZp547A0515 (from clone DKFZp547A0515)                                          | -0.3792 | 0.0397 |
| 235562_at   | LOC285382 | hypothetical gene supported by AK091454                                                      | -0.3173 | 0.0281 |
| 235567_at   | LOC283666 | Hypothetical protein LOC283666                                                               | -2.195  | 0.0011 |
| 235577_at   | ZNF652    | Zinc finger protein 652                                                                      | -0.6397 | 0.0121 |
| 235589_s_at |           | Transcribed locus                                                                            | -1.2194 | 0.0098 |
| 235600_at   |           | Transcribed locus                                                                            | -1.6091 | 0.0353 |
| 235612_at   |           | Transcribed locus                                                                            | -0.8682 | 0.0114 |
| 235613_at   |           | Transcribed locus                                                                            | -1.0895 | 0.0109 |
| 235618_at   | ZNF507    | zinc finger protein 507                                                                      | -0.7803 | 0.0019 |
| 235652_at   |           | CDNA FLJ37623 fis; clone BRCOC2014013                                                        | -1.2397 | 0.0313 |
| 235662_at   |           | Transcribed locus                                                                            | -0.5872 | 0.0164 |
| 235679_at   |           | CDNA FLJ42928 fis; clone BRSSN2007076                                                        | -0.5741 | 0.0199 |
| 235693_at   |           | Transcribed locus                                                                            | -1.1769 | 0.0232 |
| 235716_at   |           | Transcribed locus                                                                            | -0.7458 | 0.0331 |
| 235721_at   | DTX3      | deltex 3 homolog (Drosophila)                                                                | -1.66   | 0.0055 |
| 235743_at   |           |                                                                                              | -1.0812 | 0.0159 |
| 235745_at   | ERN1      | endoplasmic reticulum to nucleus signaling 1                                                 | -1.8559 | 0.0136 |
| 235758_at   | PNMA6A    | paraneoplastic antigen like 6A                                                               | -0.975  | 0.0392 |
| 235762_at   | TAS2R14   | taste receptor; type 2; member 14                                                            | -0.763  | 0.0201 |
| 235763_at   | SLC44A5   | solute carrier family 44; member 5                                                           | -1.9992 | 0.0456 |
| 235792_x_at | PIK3C2A   | phosphoinositide-3-kinase; class 2; alpha polypeptide                                        | -0.4665 | 0.0289 |
| 235796_at   |           | Transcribed locus                                                                            | -0.5655 | 0.0302 |
| 235803_at   |           | Transcribed locus                                                                            | -1.1568 | 0.0117 |
| 235805_at   |           | Transcribed locus                                                                            | -1.7631 | 0.0072 |
| 235825_at   |           | Transcribed locus; strongly similar to XP_001145544.1 hypothetical protein [Pan troglodytes] | -0.3857 | 0.0496 |
| 235874_at   | PRSS35    | protease; serine; 35                                                                         | -0.7343 | 0.0295 |
| 235895_at   |           | Transcribed locus                                                                            | -0.2316 | 0.0325 |
| 235927_at   |           |                                                                                              | -1.1222 | 0.0151 |
| 235959_at   | ARID4B    | AT rich interactive domain 4B (RBP1-like)                                                    | -1.2129 | 0.0136 |
| 235968_at   | CENTG2    | centaurin; gamma 2                                                                           | -0.218  | 0.0235 |
| 235977_at   | LONRF2    | LON peptidase N-terminal domain and ring finger 2                                            | -1.7128 | 0.028  |
| 235989_at   |           | Transcribed locus                                                                            | -0.8248 | 0.013  |
| 236006_s_at | AKAP10    | A kinase (PRKA) anchor protein 10                                                            | -0.8129 | 0.0063 |
| 236007_at   | AKAP10    | A kinase (PRKA) anchor protein 10                                                            | -0.9327 | 0.0113 |
| 236009_at   |           | Transcribed locus                                                                            | -0.3766 | 0.0333 |
| 236062_at   |           | Transcribed locus                                                                            | -0.3025 | 0.0137 |
| 236066_at   |           | Transcribed locus                                                                            | -0.4139 | 0.0415 |
| 236067_at   |           | Transcribed locus                                                                            | -1.5541 | 0.0029 |
| 236118_at   | LOC728473 | hypothetical protein LOC728473                                                               | -1.3682 | 0.0437 |
| 236134_at   | WDR68     | WD repeat domain 68                                                                          | -0.6924 | 0.0166 |
| 236139_at   |           | Transcribed locus                                                                            | -0.2982 | 0.0469 |
| 236168_at   |           | Transcribed locus                                                                            | -0.4725 | 0.0067 |
| 236194_at   |           | Transcribed locus; moderately similar to NP_001018860.1 protein LOC401398 [Homo sapiens]     | -0.6477 | 0.049  |
| 236210_at   |           | Transcribed locus                                                                            | -0.6906 | 0.0008 |
| 236216_at   |           | MRNA; cDNA DKFZp313B2312 (from clone DKFZp313B2312)                                          | -0.4728 | 0.0371 |
| 236241_at   | MED31     | mediator complex subunit 31                                                                  | -0.9825 | 0.0098 |
| 236244_at   | HNRPU     | Heterogeneous nuclear ribonucleoprotein U (scaffold attachment factor A)                     | -0.4811 | 0.0184 |
| 236246_x_at | LOC653160 | Hypothetical protein LOC653160                                                               | -0.1359 | 0.0338 |
| 236266_at   | LOC283666 | Hypothetical protein LOC283666                                                               | -1.5802 | 0.0131 |
| 236273_at   | NBPF1     | neuroblastoma breakpoint family; member 1                                                    | -1.9837 | 0.0062 |
| 236302_at   | PPM1E     | protein phosphatase 1E (PP2C domain containing)                                              | -0.9944 | 0.0289 |
| 236355_s_at |           | Transcribed locus                                                                            | -0.902  | 0.0381 |

|             |          |                                                                                                                                                                         |         |        |
|-------------|----------|-------------------------------------------------------------------------------------------------------------------------------------------------------------------------|---------|--------|
| 236368_at   | KIAA0368 | KIAA0368                                                                                                                                                                | -1.0022 | 0.014  |
| 236370_at   |          | Transcribed locus                                                                                                                                                       | -1.1976 | 0.0178 |
| 236404_at   |          | Transcribed locus                                                                                                                                                       | -0.783  | 0.041  |
| 236415_at   | MGC24039 | hypothetical protein MGC24039                                                                                                                                           | -0.1494 | 0.0383 |
| 236432_at   |          | Transcribed locus                                                                                                                                                       | -0.1386 | 0.0421 |
| 236435_at   |          |                                                                                                                                                                         | -1.1687 | 0.0054 |
| 236438_at   |          | Transcribed locus                                                                                                                                                       | -0.1658 | 0.0057 |
| 236451_at   |          | CDNA FLJ14635 fis; clone NT2RP2001196                                                                                                                                   | -0.1421 | 0.0487 |
| 236472_at   |          | Transcribed locus                                                                                                                                                       | -0.9103 | 0.0027 |
| 236480_at   |          | CDNA FLJ41489 fis; clone BRTHA2004582                                                                                                                                   | -1.2695 | 0.0391 |
| 236483_at   |          | Transcribed locus                                                                                                                                                       | -0.1893 | 0.0267 |
| 236492_at   | PPP2R2A  | protein phosphatase 2 (formerly 2A); regulatory subunit B; alpha isoform                                                                                                | -1.1838 | 0.0228 |
| 236528_at   |          | Transcribed locus                                                                                                                                                       | -0.6141 | 0.0048 |
| 236533_at   | DDEF1    | development and differentiation enhancing factor 1                                                                                                                      | -0.4498 | 0.0296 |
| 236545_at   |          | Transcribed locus                                                                                                                                                       | -1.6675 | 0.0025 |
| 236669_at   |          | (clone 33) macronuclear mRNA                                                                                                                                            | -0.2192 | 0.043  |
| 236681_at   | HOXD13   | homeobox D13                                                                                                                                                            | -0.4237 | 0.0028 |
| 236699_at   |          | CDNA FLJ90129 fis; clone HEMBB1000309                                                                                                                                   | -1.8281 | 0.0123 |
| 236715_x_at | UACA     | uveal autoantigen with coiled-coil domains and ankyrin repeats                                                                                                          | -0.333  | 0.0462 |
| 236752_at   |          | Transcribed locus                                                                                                                                                       | -0.8395 | 0.0364 |
| 236755_at   |          | Transcribed locus                                                                                                                                                       | -0.3584 | 0.0248 |
| 236780_at   |          | Transcribed locus                                                                                                                                                       | -0.3364 | 0.0496 |
| 236799_at   |          | Transcribed locus                                                                                                                                                       | -0.1206 | 0.0274 |
| 236814_at   | MDM4     | Mdm4; transformed 3T3 cell double minute 4; p53 binding protein (mouse)                                                                                                 | -0.9998 | 0.0017 |
| 236839_at   |          | Transcribed locus                                                                                                                                                       | -0.2131 | 0.0393 |
| 236841_at   | FAM39DP  | Family with sequence similarity 39; member D pseudogene                                                                                                                 | -1.1092 | 0.0004 |
| 236850_at   | CAPRIN1  | Cell cycle associated protein 1                                                                                                                                         | -0.1255 | 0.0433 |
| 236879_at   |          | Transcribed locus                                                                                                                                                       | -0.5416 | 0.0357 |
| 236887_at   | KIN      | KIN; antigenic determinant of recA protein homolog (mouse)                                                                                                              | -0.45   | 0.016  |
| 236915_at   |          |                                                                                                                                                                         | -1.5969 | 0.043  |
| 236948_x_at | SFRS11   | Splicing factor; arginine/serine-rich 11                                                                                                                                | -0.2656 | 0.0287 |
| 236978_at   |          | Transcribed locus                                                                                                                                                       | -0.9258 | 0.0218 |
| 237001_at   |          | Transcribed locus                                                                                                                                                       | -0.4131 | 0.0139 |
| 237025_at   |          | Transcribed locus                                                                                                                                                       | -0.4602 | 0.0028 |
| 237040_at   | CWF19L2  | CWF19-like 2; cell cycle control (S. pombe)                                                                                                                             | -0.4508 | 0.0217 |
| 237044_s_at |          |                                                                                                                                                                         | -0.6796 | 0.0253 |
| 237051_at   |          | Transcribed locus                                                                                                                                                       | -0.7113 | 0.0244 |
| 237067_at   |          |                                                                                                                                                                         | -0.2667 | 0.0335 |
| 237081_at   |          | Transcribed locus                                                                                                                                                       | -0.6215 | 0.0486 |
| 237084_at   |          | CDNA FLJ41316 fis; clone BRAMY2043314                                                                                                                                   | -0.5494 | 0.0123 |
| 237107_at   | PRKRA    | protein kinase; interferon-inducible double stranded RNA dependent activator, protein kinase; interferon-inducible double stranded RNA dependent activator pseudogene 1 | -0.7538 | 0.0153 |
| 237114_at   |          | Transcribed locus                                                                                                                                                       | -0.1891 | 0.0045 |
| 237136_at   |          | Transcribed locus                                                                                                                                                       | -0.1275 | 0.0465 |
| 237180_at   | PSME4    | Proteasome (prosome; macropain) activator subunit 4                                                                                                                     | -1.2744 | 0.0082 |
| 237218_at   |          |                                                                                                                                                                         | -0.4069 | 0.0201 |
| 237261_at   |          |                                                                                                                                                                         | -0.6435 | 0.033  |
| 237285_at   | SORBS2   | sorbin and SH3 domain containing 2                                                                                                                                      | -0.5647 | 0.0321 |
| 237305_at   |          | Transcribed locus                                                                                                                                                       | -1.6952 | 0.022  |
| 237310_at   |          | Transcribed locus                                                                                                                                                       | -0.975  | 0.0016 |
| 237330_at   |          | Transcribed locus                                                                                                                                                       | -1.1229 | 0.0091 |
| 237346_at   | TGDS     | TDP-glucose 4;6-dehydratase                                                                                                                                             | -0.3279 | 0.0116 |
| 237377_at   |          | Transcribed locus                                                                                                                                                       | -0.2698 | 0.0189 |
| 237384_x_at |          | CDNA clone IMAGE:5262496                                                                                                                                                | -0.1394 | 0.0445 |
| 237398_at   |          | Transcribed locus                                                                                                                                                       | -0.7315 | 0.0054 |
| 237418_at   | CDK5RAP2 | CDK5 regulatory subunit associated protein 2                                                                                                                            | -0.5778 | 0.0041 |

|             |         |                                                                                                                                              |         |        |
|-------------|---------|----------------------------------------------------------------------------------------------------------------------------------------------|---------|--------|
| 237456_at   |         | Transcribed locus                                                                                                                            | -0.8307 | 0.0253 |
| 237475_x_at | SEPP1   | Selenoprotein P; plasma; 1                                                                                                                   | -0.4607 | 0.0402 |
| 237483_at   |         | Transcribed locus                                                                                                                            | -1.7343 | 0.0098 |
| 237496_at   |         |                                                                                                                                              | -1.304  | 0.003  |
| 237502_at   | CRLS1   | Cardiolipin synthase 1                                                                                                                       | -0.538  | 0.0181 |
| 237509_at   |         | CDNA FLJ38525 fis; clone HCHON2000851                                                                                                        | -1.7405 | 0.0436 |
| 237568_at   |         | Transcribed locus                                                                                                                            | -0.6004 | 0.0092 |
| 237569_at   |         |                                                                                                                                              | -0.1232 | 0.049  |
| 237571_at   |         | Transcribed locus                                                                                                                            | -0.6851 | 0.0375 |
| 237594_at   |         |                                                                                                                                              | -0.8116 | 0.0345 |
| 237618_at   |         |                                                                                                                                              | -0.1448 | 0.0285 |
| 237703_at   |         | Transcribed locus                                                                                                                            | -0.9445 | 0.0244 |
| 237716_at   |         |                                                                                                                                              | -0.3955 | 0.0318 |
| 237782_at   |         | Transcribed locus                                                                                                                            | -0.7652 | 0.0019 |
| 237803_x_at |         | Transcribed locus                                                                                                                            | -0.8109 | 0.0401 |
| 237825_x_at |         | Transcribed locus                                                                                                                            | -0.3721 | 0.0336 |
| 237831_x_at | MMAA    | methylmalonic aciduria (cobalamin deficiency) cblA type                                                                                      | -0.1152 | 0.0383 |
| 237864_at   |         | CDNA FLJ26101 fis; clone SLV05922                                                                                                            | -0.9582 | 0.0087 |
| 237881_at   |         | Transcribed locus                                                                                                                            | -0.5959 | 0.0452 |
| 237963_x_at |         |                                                                                                                                              | -0.1224 | 0.032  |
| 237968_at   | ARL6IP2 | ADP-ribosylation factor-like 6 interacting protein 2                                                                                         | -0.7275 | 0.0234 |
| 238040_at   |         | Transcribed locus                                                                                                                            | -1.3282 | 0.0005 |
| 238044_at   |         | Transcribed locus                                                                                                                            | -0.4454 | 0.0111 |
| 238049_at   | GRAMD3  | GRAM domain containing 3                                                                                                                     | -0.5343 | 0.0412 |
| 238076_at   | GATAD2B | GATA zinc finger domain containing 2B                                                                                                        | -0.8704 | 0.0317 |
| 238108_at   |         | Transcribed locus                                                                                                                            | -0.9493 | 0.04   |
| 238109_at   |         | Homo sapiens; clone IMAGE:4346533; mRNA                                                                                                      | -0.671  | 0.0202 |
| 238117_at   | PPOX    | protoporphyrinogen oxidase                                                                                                                   | -0.2389 | 0.0344 |
| 238119_at   |         | Transcribed locus                                                                                                                            | -0.8131 | 0.0049 |
| 238146_at   |         | Transcribed locus                                                                                                                            | -0.5136 | 0.0418 |
| 238161_at   |         | Transcribed locus                                                                                                                            | -0.6012 | 0.0215 |
| 238182_at   |         | Transcribed locus                                                                                                                            | -0.2279 | 0.0367 |
| 238193_at   |         | Transcribed locus                                                                                                                            | -0.6669 | 0.0125 |
| 238227_at   |         | Transcribed locus                                                                                                                            | -0.4543 | 0.0061 |
| 238231_at   | NFYC    | Nuclear transcription factor Y; gamma                                                                                                        | -0.2722 | 0.0191 |
| 238252_at   |         | Transcribed locus                                                                                                                            | -0.2923 | 0.0073 |
| 238277_at   |         |                                                                                                                                              | -0.3563 | 0.047  |
| 238281_at   |         | Transcribed locus                                                                                                                            | -0.2781 | 0.0074 |
| 238311_at   |         | Transcribed locus                                                                                                                            | -0.967  | 0.0377 |
| 238384_x_at |         | Transcribed locus                                                                                                                            | -0.1155 | 0.0445 |
| 238409_x_at | OXR1    | oxidation resistance 1                                                                                                                       | -0.2775 | 0.0173 |
| 238436_s_at | ZNF805  | zinc finger protein 805                                                                                                                      | -0.7238 | 0.0277 |
| 238444_at   | ZNF618  | zinc finger protein 618                                                                                                                      | -1.2914 | 0.0007 |
| 238447_at   | RBMS3   | RNA binding motif; single stranded interacting protein                                                                                       | -1.6445 | 0.0308 |
| 238468_at   | TNRC6B  | trinucleotide repeat containing 6B                                                                                                           | -0.7012 | 0.0475 |
| 238492_at   |         | CDNA FLJ33148 fis; clone UTERU2000238                                                                                                        | -0.4097 | 0.0124 |
| 238496_at   |         | Transcribed locus                                                                                                                            | -0.7548 | 0.0097 |
| 238497_at   | TMEM136 | transmembrane protein 136                                                                                                                    | -1.2335 | 0.0004 |
| 238536_at   |         | CDNA FLJ13474 fis; clone PLACE1003593                                                                                                        | -1.3186 | 0.0072 |
| 238551_at   | FUT11   | fucosyltransferase 11 (alpha (1;3) fucosyltransferase)                                                                                       | -0.9093 | 0.0256 |
| 238553_at   | BMS1P5  | BMS1 pseudogene 5, centaurin; gamma-like family; member 2, centaurin; gamma-like family; member 9 pseudogene, hypothetical protein LOC643564 | -0.3549 | 0.0157 |
| 238573_at   |         | Transcribed locus                                                                                                                            | -0.3546 | 0.0355 |
| 238602_at   | DIS3L2  | DIS3 mitotic control homolog (S. cerevisiae)-like 2                                                                                          | -0.6851 | 0.0225 |
| 238624_at   | NLK     | Nemo-like kinase                                                                                                                             | -1.7314 | 0.0115 |
| 238652_at   |         | Transcribed locus; strongly similar to XP_001111525.1 amine oxidase (flavin containing) domain 2 [Macaca mulatta]                            | -0.5935 | 0.0255 |
| 238666_at   |         | Transcribed locus                                                                                                                            | -2.3777 | 0.002  |
| 238672_at   |         | Transcribed locus                                                                                                                            | -0.5468 | 0.0221 |

|             |           |                                                                                         |         |        |
|-------------|-----------|-----------------------------------------------------------------------------------------|---------|--------|
| 238700_at   |           | Transcribed locus                                                                       | -1.4011 | 0.0013 |
| 238714_at   |           | Transcribed locus                                                                       | -0.7894 | 0.0412 |
| 238736_at   | REV3L     | REV3-like; catalytic subunit of DNA polymerase zeta (yeast)                             | -1.054  | 0.015  |
| 238751_at   |           | CDNA clone IMAGE:4791597                                                                | -1.9337 | 0.0283 |
| 238761_at   | ELK4      | ELK4; ETS-domain protein (SRF accessory protein 1)                                      | -0.6473 | 0.0158 |
| 238768_at   | LOC388969 | hypothetical LOC388969                                                                  | -1.1484 | 0.0048 |
| 238769_at   |           | Transcribed locus                                                                       | -0.1498 | 0.0188 |
| 238774_at   |           |                                                                                         | -1.2719 | 0.0426 |
| 238785_at   |           | Transcribed locus                                                                       | -1.0228 | 0.0296 |
| 238833_at   | LOC729088 | hypothetical protein LOC729088                                                          | -0.7443 | 0.0478 |
| 238875_at   |           | Clone HLS_IMAGE_731119 mRNA sequence                                                    | -1.1409 | 0.0179 |
| 238883_at   |           | Transcribed locus                                                                       | -1.2266 | 0.0242 |
| 238884_at   |           | Transcribed locus                                                                       | -0.4686 | 0.0196 |
| 238899_at   |           | Transcribed locus                                                                       | -0.1097 | 0.0035 |
| 238913_at   |           | Transcribed locus                                                                       | -0.9856 | 0.0433 |
| 238933_at   | IRS1      | Insulin receptor substrate 1                                                            | -1.9666 | 0.0037 |
| 238951_at   |           | Transcribed locus                                                                       | -0.7089 | 0.0418 |
| 238981_at   | MGC3196   | hypothetical protein MGC3196                                                            | -0.1446 | 0.0178 |
| 239005_at   |           | Transcribed locus                                                                       | -0.794  | 0.0239 |
| 239014_at   | CCAR1     | Cell division cycle and apoptosis regulator 1                                           | -1.1007 | 0.0247 |
| 239033_at   |           | MRNA; cDNA DKFZp666M079 (from clone DKFZp666M079)                                       | -1.9394 | 0.0012 |
| 239045_at   |           | Transcribed locus                                                                       | -0.9148 | 0.0008 |
| 239049_at   |           | CDNA FLJ13202 fis; clone NT2RP3004503                                                   | -1.1507 | 0.0058 |
| 239050_s_at |           | CDNA FLJ13202 fis; clone NT2RP3004503                                                   | -0.8339 | 0.0222 |
| 239071_at   | RBBP4     | Retinoblastoma binding protein 4                                                        | -0.6907 | 0.0092 |
| 239076_at   | 13-Sep    | septin 13                                                                               | -0.1639 | 0.0223 |
| 239121_at   |           | Transcribed locus                                                                       | -0.4483 | 0.0236 |
| 239131_at   |           | Transcribed locus                                                                       | -0.8844 | 0.0341 |
| 239151_at   | BMS1P5    | BMS1 pseudogene 5, hypothetical protein LOC643564                                       | -1.0836 | 0.0022 |
| 239161_at   | FDX1      | ferredoxin 1                                                                            | -1.9655 | 0.0113 |
| 239166_at   |           | Transcribed locus                                                                       | -0.3682 | 0.0254 |
| 239171_at   |           |                                                                                         | -0.2961 | 0.0464 |
| 239191_at   |           | Transcribed locus                                                                       | -0.1106 | 0.0356 |
| 239193_at   | LOC158301 | hypothetical protein LOC158301                                                          | -1.467  | 0.0032 |
| 239210_at   |           | Transcribed locus                                                                       | -1.1061 | 0.0305 |
| 239224_at   | FBXL20    | F-box and leucine-rich repeat protein 20                                                | -0.1825 | 0.037  |
| 239227_at   |           |                                                                                         | -1.2493 | 0.003  |
| 239232_at   | MSI2      | Musashi homolog 2 (Drosophila)                                                          | -1.1591 | 0.0002 |
| 239238_at   |           | Transcribed locus                                                                       | -0.9176 | 0.0338 |
| 239243_at   | ZNF638    | Zinc finger protein 638                                                                 | -1.5628 | 0.0159 |
| 239246_at   | FARP1     | FERM; RhoGEF (ARHGEF) and pleckstrin domain protein 1 (chondrocyte-derived)             | -2.1335 | 0.0156 |
| 239251_at   |           | Transcribed locus                                                                       | -1.1539 | 0.0082 |
| 239285_at   | JMJD2C    | Jumonji domain containing 2C                                                            | -1.3534 | 0.0091 |
| 239300_at   |           | CDNA clone IMAGE:4798675                                                                | -1.1835 | 0.0049 |
| 239301_at   | LOC644285 | hypothetical LOC644285                                                                  | -0.6729 | 0.006  |
| 239358_at   |           | Transcribed locus                                                                       | -1.895  | 0.0167 |
| 239363_at   |           | Transcribed locus                                                                       | -0.8058 | 0.0337 |
| 239387_at   |           | Transcribed locus                                                                       | -0.2082 | 0.0294 |
| 239390_at   | GTDC1     | glycosyltransferase-like domain containing 1                                            | -0.6347 | 0.0315 |
| 239418_x_at |           | Transcribed locus                                                                       | -0.288  | 0.0149 |
| 239442_at   | CEP68     | centrosomal protein 68kDa                                                               | -0.7892 | 0.0397 |
| 239445_at   |           | Transcribed locus                                                                       | -0.3875 | 0.0141 |
| 239451_at   |           | CDNA FLJ26407 fis; clone HRT09288                                                       | -1.1776 | 0.0205 |
| 239461_at   | GALNTL2   | UDP-N-acetyl-alpha-D-galactosamine:polypeptide N-acetylgalactosaminyltransferase-like 2 | -0.2538 | 0.0164 |
| 239463_at   |           | Transcribed locus                                                                       | -0.4404 | 0.0219 |
| 239469_at   |           | Transcribed locus                                                                       | -0.3473 | 0.0373 |



|             |          |                                                                                                |         |        |
|-------------|----------|------------------------------------------------------------------------------------------------|---------|--------|
| 239478_x_at |          | Full-length cDNA clone CS0CAP006YP08 of Thymus of Homo sapiens (human)                         | -0.2831 | 0.0074 |
| 239519_at   |          | Transcribed locus                                                                              | -1.0222 | 0.0438 |
| 239536_at   |          | Transcribed locus                                                                              | -0.6778 | 0.0154 |
| 239540_at   |          |                                                                                                | -0.2457 | 0.041  |
| 239545_at   |          | Transcribed locus                                                                              | -1.6175 | 0.0067 |
| 239548_at   | NEGR1    | neuronal growth regulator 1                                                                    | -0.1398 | 0.0248 |
| 239557_at   |          | Transcribed locus                                                                              | -0.9126 | 0.0087 |
| 239559_at   |          | Partial unknown mRNA from drug-resistant melanoma cells; 3'UTR; clone DMS-9                    | -1.0977 | 0.0233 |
| 239576_at   | MTUS1    | Mitochondrial tumor suppressor 1                                                               | -1.1193 | 0.0186 |
| 239604_at   |          | Transcribed locus                                                                              | -0.5129 | 0.0002 |
| 239614_x_at |          | Transcribed locus                                                                              | -0.6099 | 0.0012 |
| 239619_at   |          |                                                                                                | -1.6728 | 0.0239 |
| 239621_at   |          | Transcribed locus                                                                              | -0.3163 | 0.0364 |
| 239630_at   |          |                                                                                                | -1.0501 | 0.0227 |
| 239635_at   | TMEM137  | transmembrane protein 137                                                                      | -0.6092 | 0.0111 |
| 239644_at   |          | CDNA clone IMAGE:5275753                                                                       | -0.848  | 0.0407 |
| 239682_at   |          | Full-length cDNA clone CS0DC024YB19 of Neuroblastoma Cot 25-normalized of Homo sapiens (human) | -0.9959 | 0.0075 |
| 239716_at   |          | Transcribed locus                                                                              | -0.6034 | 0.0174 |
| 239740_at   | ETV6     | ets variant gene 6 (TEL oncogene)                                                              | -0.8051 | 0.0362 |
| 239742_at   | TULP4    | Tubby like protein 4                                                                           | -1.0923 | 0.0341 |
| 239750_x_at | VAPA     | VAMP (vesicle-associated membrane protein)-associated protein A; 33kDa                         | -0.1696 | 0.0339 |
| 239755_at   | ST3GAL5  | ST3 beta-galactoside alpha-2,3-sialyltransferase 5                                             | -1.1893 | 0.0029 |
| 239778_x_at |          | Transcribed locus                                                                              | -0.7126 | 0.0433 |
| 239784_at   |          | Transcribed locus                                                                              | -1.4513 | 0.008  |
| 239790_s_at |          | Transcribed locus                                                                              | -0.2615 | 0.0067 |
| 239798_at   |          | Transcribed locus                                                                              | -0.9891 | 0.0494 |
| 239811_at   |          |                                                                                                | -0.7084 | 0.0207 |
| 239829_at   |          | Transcribed locus                                                                              | -0.2593 | 0.0062 |
| 239832_at   |          | Transcribed locus                                                                              | -0.9947 | 0.0189 |
| 239833_at   |          | Transcribed locus                                                                              | -0.3914 | 0.0306 |
| 239834_at   |          | Full length insert cDNA clone YR23D07                                                          | -0.7024 | 0.0417 |
| 239851_at   |          |                                                                                                | -0.2432 | 0.0389 |
| 239861_at   |          | Transcribed locus                                                                              | -0.3759 | 0.0073 |
| 239867_at   |          | Transcribed locus                                                                              | -0.3138 | 0.0117 |
| 239924_at   | LOC91316 | Similar to bK246H3.1 (immunoglobulin lambda-like polypeptide 1; pre-B-cell specific)           | -0.2447 | 0.0171 |
| 239937_at   | ZNF207   | Zinc finger protein 207                                                                        | -0.9897 | 0.0121 |
| 239954_at   | ZNF160   | zinc finger protein 160                                                                        | -1.4259 | 0.0115 |
| 239955_at   |          | Transcribed locus                                                                              | -0.8553 | 0.0081 |
| 239971_at   |          | Transcribed locus                                                                              | -0.243  | 0.0362 |
| 240016_at   |          | Transcribed locus                                                                              | -0.2377 | 0.0383 |
| 240018_at   |          | Transcribed locus                                                                              | -0.1549 | 0.0162 |
| 240088_at   | PDE5A    | phosphodiesterase 5A; cGMP-specific                                                            | -0.3834 | 0.0081 |
| 240090_at   |          | Transcribed locus                                                                              | -0.2471 | 0.0003 |
| 240120_at   |          | Transcribed locus                                                                              | -2.0713 | 0.0068 |
| 240135_x_at |          |                                                                                                | -1.0975 | 0.0464 |
| 240148_at   | MSH6     | MutS homolog 6 (E. coli)                                                                       | -0.349  | 0.0324 |
| 240168_at   | XPO7     | exportin 7                                                                                     | -0.6535 | 0.0173 |
| 240188_at   |          |                                                                                                | -1.7122 | 0.0018 |
| 240205_x_at |          |                                                                                                | -0.4556 | 0.0415 |
| 240216_at   |          | Transcribed locus                                                                              | -1.5645 | 0.0033 |
| 240231_at   |          | Transcribed locus                                                                              | -1.0235 | 0.0081 |
| 240245_at   |          |                                                                                                | -1.2871 | 0.0115 |
| 240263_at   |          | Transcribed locus                                                                              | -1.6483 | 0.0094 |
| 240279_at   |          |                                                                                                | -0.8763 | 0.0225 |
| 240307_at   |          | Transcribed locus                                                                              | -1.0116 | 0.0042 |
| 240326_at   |          | Transcribed locus                                                                              | -0.9833 | 0.005  |

|             |           |                                                      |         |        |
|-------------|-----------|------------------------------------------------------|---------|--------|
| 240335_at   | SLC35F5   | Solute carrier family 35; member F5                  | -0.195  | 0.0171 |
| 240385_at   |           |                                                      | -1.4779 | 0.0163 |
| 240446_at   |           | Transcribed locus                                    | -0.429  | 0.0361 |
| 240452_at   | GSPT1     | G1 to S phase transition 1                           | -1.0763 | 0.0317 |
| 240498_at   |           |                                                      | -0.7233 | 0.0037 |
| 240510_at   | NBN       | Nibrin                                               | -0.219  | 0.0475 |
| 240513_at   | PCID1     | PCI domain containing 1 (herpesvirus entry mediator) | -0.2242 | 0.0167 |
| 240522_at   |           |                                                      | -0.2029 | 0.002  |
| 240539_at   |           | Transcribed locus                                    | -1.0098 | 0.0148 |
| 240545_at   | LOC286382 | hypothetical protein LOC286382                       | -0.4026 | 0.0135 |
| 240548_at   |           | CDNA clone IMAGE:4791911                             | -0.1634 | 0.0471 |
| 240557_at   |           | CDNA FLJ41867 fis; clone OCBBF2005546                | -0.9011 | 0.0312 |
| 240579_at   | NAG       | neuroblastoma-amplified protein                      | -0.3143 | 0.0166 |
| 240594_at   |           | Transcribed locus                                    | -0.919  | 0.0298 |
| 240651_at   |           | Transcribed locus                                    | -1.0821 | 0.033  |
| 240698_s_at |           | Transcribed locus                                    | -0.2359 | 0.0278 |
| 240725_at   |           | CDNA FLJ42381 fis; clone UTERU2036512                | -0.427  | 0.0169 |
| 240726_at   |           | Transcribed locus                                    | -0.1348 | 0.0332 |
| 240738_at   |           | Transcribed locus                                    | -0.2312 | 0.0475 |
| 240757_at   | CLASP1    | Cytoplasmic linker associated protein 1              | -0.2032 | 0.0335 |
| 240758_at   |           |                                                      | -0.7638 | 0.0106 |
| 240765_at   |           |                                                      | -0.705  | 0.0146 |
| 240769_at   |           | Transcribed locus                                    | -0.1623 | 0.0104 |
| 240772_at   |           | Transcribed locus                                    | -1.2731 | 0.0052 |
| 240773_at   |           | Transcribed locus                                    | -0.113  | 0.0334 |
| 240788_at   |           | Transcribed locus                                    | -1.2666 | 0.036  |
| 240824_at   |           | Transcribed locus                                    | -1.0743 | 0.0081 |
| 240904_at   |           |                                                      | -0.1037 | 0.0261 |
| 240922_at   |           | Transcribed locus                                    | -0.1612 | 0.0356 |
| 240934_at   |           |                                                      | -0.3723 | 0.0227 |
| 240939_x_at |           | Transcribed locus                                    | -0.5214 | 0.0068 |
| 240964_at   |           | Transcribed locus                                    | -0.2183 | 0.0291 |
| 240968_at   |           | Transcribed locus                                    | -0.1496 | 0.039  |
| 240984_at   |           | Transcribed locus                                    | -0.4266 | 0.0004 |
| 240994_at   |           | Transcribed locus                                    | -0.1865 | 0.0326 |
| 241081_at   |           |                                                      | -0.1909 | 0.0359 |
| 241102_at   |           | Transcribed locus                                    | -0.4914 | 0.0463 |
| 241147_at   |           | Transcribed locus                                    | -0.1289 | 0.0418 |
| 241152_at   |           | Transcribed locus                                    | -0.1951 | 0.0267 |
| 241154_x_at |           | Transcribed locus                                    | -0.9182 | 0.007  |
| 241158_at   |           | Transcribed locus                                    | -0.1255 | 0.0401 |
| 241184_x_at |           | Transcribed locus                                    | -0.1104 | 0.0353 |
| 241191_at   |           |                                                      | -0.1918 | 0.0024 |
| 241210_at   |           | Transcribed locus                                    | -0.1665 | 0.0485 |
| 241334_at   |           | Transcribed locus                                    | -0.166  | 0.0075 |
| 241387_at   |           | Transcribed locus                                    | -0.8848 | 0.0116 |
| 241425_at   | NUPL1     | Nucleoporin like 1                                   | -1.2081 | 0.0115 |
| 241438_at   |           | Transcribed locus                                    | -0.7551 | 0.0166 |
| 241457_at   |           | Transcribed locus                                    | -1.8718 | 0.0231 |
| 241479_at   |           |                                                      | -0.1514 | 0.0336 |
| 241484_x_at |           |                                                      | -0.9705 | 0.0108 |
| 241494_at   |           | Transcribed locus                                    | -1.0922 | 0.0395 |
| 241506_at   |           |                                                      | -2.2859 | 0.0149 |
| 241508_at   |           |                                                      | -0.4556 | 0.0109 |
| 241509_at   |           |                                                      | -2.0978 | 0.0042 |
| 241520_x_at |           | Transcribed locus                                    | -0.2091 | 0.0226 |
| 241560_at   |           | Transcribed locus                                    | -0.2445 | 0.0357 |
| 241577_at   |           |                                                      | -0.7936 | 0.0178 |
| 241595_at   |           |                                                      | -0.4842 | 0.0098 |
| 241692_at   |           | Transcribed locus                                    | -1.6641 | 0.0032 |
| 241700_at   | ZFH4      | zinc finger homeobox 4                               | -1.9655 | 0.0057 |

|             |             |                                                                            |         |        |
|-------------|-------------|----------------------------------------------------------------------------|---------|--------|
| 241703_at   | RPIB9       | Rap2-binding protein 9                                                     | -1.6488 | 0.0127 |
| 241710_at   | hCG_1645220 | hCG1645220                                                                 | -1.1958 | 0.0254 |
| 241716_at   | HSPD1       | heat shock 60kDa protein 1 (chaperonin)                                    | -2.7084 | 0.0001 |
| 241724_x_at |             | Transcribed locus                                                          | -0.2287 | 0.0253 |
| 241740_at   |             | Transcribed locus                                                          | -0.2447 | 0.0301 |
| 241757_x_at | DYNC2L1     | dynein; cytoplasmic 2; light intermediate chain 1                          | -0.3317 | 0.0418 |
| 241768_at   |             |                                                                            | -0.4307 | 0.0282 |
| 241770_x_at |             | Transcribed locus                                                          | -0.1231 | 0.02   |
| 241789_at   |             | CDNA FLJ36544 fis; clone TRACH2006378                                      | -0.832  | 0.0392 |
| 241790_at   |             | Transcribed locus                                                          | -0.638  | 0.0162 |
| 241792_x_at |             | CDNA FLJ33355 fis; clone BRACE2005151                                      | -0.3907 | 0.0258 |
| 241794_at   | ACTR6       | ARP6 actin-related protein 6 homolog (yeast)                               | -0.1947 | 0.0005 |
| 241838_at   |             | Transcribed locus                                                          | -1.4265 | 0.0152 |
| 241848_x_at |             |                                                                            | -0.2094 | 0.0041 |
| 241851_x_at | LOC730078   | Hypothetical protein LOC730078                                             | -0.2994 | 0.0299 |
| 241897_at   |             |                                                                            | -1.8416 | 0.0021 |
| 241903_at   |             | Transcribed locus                                                          | -2.0211 | 0.0007 |
| 241905_at   | PIK3C2A     | Phosphoinositide-3-kinase; class 2; alpha polypeptide                      | -1.6989 | 0.0014 |
| 241910_x_at | ARL17P1     | ADP-ribosylation factor-like 17 pseudogene 1                               | -0.9765 | 0.0191 |
| 241932_at   |             |                                                                            | -0.3202 | 0.0397 |
| 241938_at   | QKI         | Quaking homolog; KH domain RNA binding (mouse)                             | -1.1155 | 0.0442 |
| 241954_at   | FDFT1       | Farnesyl-diphosphate farnesyltransferase 1                                 | -2.2837 | 0.0043 |
| 241956_at   |             |                                                                            | -2.3698 | 0.0004 |
| 241961_at   | SRD5A2L2    | steroid 5 alpha-reductase 2-like 2                                         | -0.1032 | 0.0357 |
| 241970_at   |             | Transcribed locus                                                          | -1.0925 | 0.0159 |
| 241984_at   | FOXN3       | forkhead box N3                                                            | -0.2144 | 0.0496 |
| 241997_at   |             | Transcribed locus                                                          | -0.6438 | 0.0235 |
| 242001_at   | IDH1        | Isocitrate dehydrogenase 1 (NADP+); soluble                                | -0.4616 | 0.0233 |
| 242006_at   | LCA5        | Leber congenital amaurosis 5                                               | -0.5504 | 0.0034 |
| 242022_at   |             | Transcribed locus                                                          | -1.6019 | 0.002  |
| 242029_at   | FNDC3B      | Fibronectin type III domain containing 3B                                  | -0.9473 | 0.0415 |
| 242068_at   |             | Transcribed locus                                                          | -1.3137 | 0.0123 |
| 242073_at   |             | Transcribed locus                                                          | -0.7641 | 0.0297 |
| 242074_at   |             | Transcribed locus                                                          | -0.4844 | 0.0225 |
| 242109_at   | SYTL3       | Synaptotagmin-like 3                                                       | -0.263  | 0.0138 |
| 242110_at   |             | Transcribed locus                                                          | -0.9466 | 0.0158 |
| 242111_at   | METTL3      | methyltransferase like 3                                                   | -0.8639 | 0.0287 |
| 242113_at   |             | Transcribed locus                                                          | -0.3134 | 0.0285 |
| 242119_at   | PROX1       | Prospero homeobox 1                                                        | -0.4546 | 0.0307 |
| 242125_at   |             | CDNA FLJ36209 fis; clone THYMU2000022                                      | -0.2874 | 0.0488 |
| 242126_at   |             | Transcribed locus                                                          | -0.5648 | 0.0081 |
| 242134_at   |             | Transcribed locus                                                          | -0.4467 | 0.0374 |
| 242143_at   |             | Transcribed locus                                                          | -1.4283 | 0.008  |
| 242172_at   | MEIS1       | Meis homeobox 1                                                            | -1.5877 | 0.0273 |
| 242194_at   | CUL4A       | Cullin 4A                                                                  | -0.607  | 0.0011 |
| 242195_x_at | NUMBL       | numb homolog (Drosophila)-like                                             | -0.5128 | 0.0487 |
| 242202_at   |             | CDNA clone IMAGE:5302136                                                   | -0.1807 | 0.0324 |
| 242210_at   | ZNF24       | Zinc finger protein 24                                                     | -0.4328 | 0.0145 |
| 242235_x_at | NRD1        | Nardilysin (N-arginine dibasic convertase)                                 | -0.4985 | 0.0151 |
| 242236_at   |             |                                                                            | -0.2383 | 0.0126 |
| 242239_at   |             | CDNA clone IMAGE:5314281                                                   | -1.0803 | 0.045  |
| 242255_at   | WDR37       | WD repeat domain 37                                                        | -1.4411 | 0.0025 |
| 242256_x_at |             |                                                                            | -0.2172 | 0.0089 |
| 242285_at   |             | Transcribed locus                                                          | -0.1369 | 0.0301 |
| 242289_at   |             |                                                                            | -0.8428 | 0.0107 |
| 242290_at   | TACC1       | transforming; acidic coiled-coil containing protein 1                      | -0.6707 | 0.0205 |
| 242343_x_at |             |                                                                            | -1.1742 | 0.0122 |
| 242348_at   | FAM19A4     | family with sequence similarity 19 (chemokine (C-C motif)-like); member A4 | -2.4906 | 0.0241 |
| 242349_at   | HECTD1      | HECT domain containing 1                                                   | -0.9919 | 0.0061 |

|             |           |                                                                         |         |        |
|-------------|-----------|-------------------------------------------------------------------------|---------|--------|
| 242361_at   | IMMT      | Inner membrane protein; mitochondrial (mitofilin)                       | -0.6019 | 0.0389 |
| 242362_at   |           | Transcribed locus                                                       | -0.998  | 0.0021 |
| 242369_x_at |           | MRNA; cDNA DKFZp313O038 (from clone DKFZp313O038)                       | -0.4826 | 0.0356 |
| 242371_x_at |           |                                                                         | -0.1909 | 0.0381 |
| 242376_at   |           | Transcribed locus                                                       | -0.2903 | 0.0249 |
| 242385_at   | RORB      | RAR-related orphan receptor B                                           | -1.7172 | 0.0247 |
| 242389_at   |           | CDNA FLJ33355 fis; clone BRACE2005151                                   | -1.035  | 0.0033 |
| 242391_at   |           |                                                                         | -0.1394 | 0.0267 |
| 242398_x_at |           | Transcribed locus                                                       | -0.2283 | 0.0311 |
| 242407_at   |           |                                                                         | -0.58   | 0.0233 |
| 242416_at   |           |                                                                         | -0.3876 | 0.0261 |
| 242427_at   | WAC       | WW domain containing adaptor with coiled-coil                           | -0.6031 | 0.0143 |
| 242438_at   |           |                                                                         | -1.3594 | 0.0088 |
| 242439_s_at |           |                                                                         | -0.8486 | 0.0089 |
| 242447_at   | LOC285382 | hypothetical gene supported by AK091454                                 | -2.065  | 0.0159 |
| 242458_at   | RALGPS2   | Ral GEF with PH domain and SH3 binding motif 2                          | -0.3973 | 0.0487 |
| 242471_at   |           | Clone HLS_IMAGE_238756 mRNA sequence                                    | -1.2328 | 0.012  |
| 242480_at   |           | Transcribed locus                                                       | -0.5889 | 0.0102 |
| 242483_at   |           |                                                                         | -0.5626 | 0.0341 |
| 242485_at   |           | Transcribed locus                                                       | -0.8098 | 0.0015 |
| 242492_at   |           |                                                                         | -0.6108 | 0.0055 |
| 242493_at   | PTPRD     | protein tyrosine phosphatase; receptor type; D                          | -0.1037 | 0.0411 |
| 242494_at   |           | Transcribed locus                                                       | -0.5954 | 0.0141 |
| 242498_x_at |           | Transcribed locus                                                       | -0.3994 | 0.0387 |
| 242529_x_at |           |                                                                         | -0.2115 | 0.0042 |
| 242540_at   | C11orf47  | chromosome 11 open reading frame 47                                     | -0.2565 | 0.0046 |
| 242546_at   | FLJ39632  | hypothetical LOC642477                                                  | -1.7429 | 0.0173 |
| 242549_at   | PRKD3     | protein kinase D3                                                       | -1.8623 | 0.0111 |
| 242558_at   |           | CDNA FLJ45490 fis; clone BRTHA2005831                                   | -1.9317 | 0.0002 |
| 242576_x_at | PFAAP5    | Phosphonoformate immuno-associated protein 5                            | -0.4721 | 0.0321 |
| 242591_at   | DNAH1     | Dynein; axonemal; heavy chain 1                                         | -0.1079 | 0.0495 |
| 242608_x_at | C14orf44  | Chromosome 14 open reading frame 44                                     | -0.4044 | 0.0323 |
| 242616_at   |           | Transcribed locus                                                       | -0.5015 | 0.0019 |
| 242622_x_at | PTEN      | Phosphatase and tensin homolog (mutated in multiple advanced cancers 1) | -0.2341 | 0.0122 |
| 242646_at   |           | Transcribed locus                                                       | -1.2542 | 0.0046 |
| 242651_at   |           | Transcribed locus                                                       | -0.4093 | 0.0468 |
| 242677_at   |           | Transcribed locus                                                       | -0.455  | 0.024  |
| 242679_at   |           | CDNA clone IMAGE:5272988                                                | -0.3809 | 0.0233 |
| 242688_at   |           | Transcribed locus                                                       | -1.3715 | 0.0044 |
| 242691_at   |           | CDNA FLJ41369 fis; clone BRCAN2006117                                   | -1.4512 | 0.0181 |
| 242700_at   | PON2      | paraoxonase 2                                                           | -0.3332 | 0.0056 |
| 242707_at   | MED23     | mediator complex subunit 23                                             | -0.4169 | 0.0458 |
| 242721_at   |           |                                                                         | -0.3709 | 0.0139 |
| 242724_x_at |           |                                                                         | -0.347  | 0.0274 |
| 242726_at   |           | Transcribed locus                                                       | -0.4387 | 0.0001 |
| 242732_at   |           | Transcribed locus                                                       | -0.4705 | 0.0461 |
| 242738_s_at | ZFX3      | zinc finger homeobox 3                                                  | -0.9061 | 0.0392 |
| 242739_at   | C6orf201  | Chromosome 6 open reading frame 201                                     | -1.7699 | 0.0096 |
| 242748_at   | SREBF2    | Sterol regulatory element binding transcription factor 2                | -0.4333 | 0.018  |
| 242749_at   |           | Transcribed locus                                                       | -0.6147 | 0.0052 |
| 242751_at   |           | Transcribed locus                                                       | -1.2958 | 0.0154 |
| 242771_at   | TTN       | Titin                                                                   | -0.2315 | 0.002  |
| 242776_at   | ZCCHC6    | zinc finger; CCHC domain containing 6                                   | -0.6782 | 0.0129 |
| 242780_at   | VAPA      | VAMP (vesicle-associated membrane protein)-associated protein A; 33kDa  | -0.5227 | 0.0111 |
| 242785_at   | FLJ42562  | similar to echinoderm microtubule associated protein like 5             | -1.0915 | 0.0224 |
| 242802_x_at |           | Transcribed locus                                                       | -0.1677 | 0.0435 |
| 242805_at   |           |                                                                         | -0.2982 | 0.0201 |

|             |           |                                                                                                                        |         |        |
|-------------|-----------|------------------------------------------------------------------------------------------------------------------------|---------|--------|
| 242818_x_at |           | Transcribed locus                                                                                                      | -0.5931 | 0.0167 |
| 242841_at   |           | Full length insert cDNA clone YS02G11                                                                                  | -0.1413 | 0.0474 |
| 242851_at   | KIAA1919  | KIAA1919                                                                                                               | -0.8028 | 0.0453 |
| 242853_at   |           | Transcribed locus                                                                                                      | -0.6931 | 0.0332 |
| 242872_at   | CIT       | citron (rho-interacting; serine/threonine kinase 21)                                                                   | -0.2823 | 0.0368 |
| 242877_at   |           | Transcribed locus                                                                                                      | -1.1341 | 0.0045 |
| 242881_x_at |           | Clone HLS_IMAGE_626842 mRNA sequence                                                                                   | -2.274  | 0.0107 |
| 242940_x_at | DLX6      | distal-less homeobox 6                                                                                                 | -1.0696 | 0.0429 |
| 242968_at   |           | Transcribed locus                                                                                                      | -1.061  | 0.0149 |
| 242979_at   |           | Transcribed locus                                                                                                      | -1.4264 | 0.0282 |
| 243003_at   |           | CDNA FLJ45369 fis; clone BRHIP3017325                                                                                  | -1.2304 | 0.0473 |
| 243009_at   | LOC441242 | CDNA clone IMAGE:5302136, Hypothetical LOC441242                                                                       | -0.7553 | 0.0145 |
| 243031_at   |           | Transcribed locus                                                                                                      | -1.3208 | 0.0129 |
| 243037_at   |           |                                                                                                                        | -1.1711 | 0.0049 |
| 243041_s_at |           | Transcribed locus                                                                                                      | -0.4534 | 0.0348 |
| 243055_at   |           | Transcribed locus                                                                                                      | -0.3299 | 0.0195 |
| 243147_x_at |           | Transcribed locus                                                                                                      | -0.3678 | 0.0114 |
| 243149_at   |           | Transcribed locus                                                                                                      | -1.2298 | 0.022  |
| 243163_at   |           | Transcribed locus                                                                                                      | -0.1465 | 0.0343 |
| 243184_at   |           |                                                                                                                        | -0.8439 | 0.0397 |
| 243216_x_at |           | Transcribed locus                                                                                                      | -0.3893 | 0.0219 |
| 243218_at   |           | Transcribed locus                                                                                                      | -0.291  | 0.0416 |
| 243234_at   | TBX3      | T-box 3 (ulnar mammary syndrome)                                                                                       | -1.5754 | 0.0021 |
| 243280_at   |           | MRNA; cDNA DKFZp686J19109 (from clone DKFZp686J19109)                                                                  | -0.4561 | 0.0168 |
| 243286_at   |           | Transcribed locus                                                                                                      | -1.0775 | 0.0094 |
| 243318_at   | WDR42A    | WD repeat domain 42A                                                                                                   | -1.1062 | 0.024  |
| 243365_s_at | AUTS2     | autism susceptibility candidate 2                                                                                      | -0.4732 | 0.0047 |
| 243388_at   |           | Transcribed locus; strongly similar to XP_519898.1 similar to DKFZP564O0463 protein; HSPC064 protein [Pan troglodytes] | -0.7281 | 0.0305 |
| 243395_at   |           | Transcribed locus                                                                                                      | -1.198  | 0.0248 |
| 243400_x_at | LTBR      | lymphotoxin beta receptor (TNFR superfamily; member 3)                                                                 | -0.1602 | 0.0164 |
| 243416_at   |           |                                                                                                                        | -1.0256 | 0.0434 |
| 243428_at   | KCNQ1OT1  | KCNQ1 overlapping transcript 1                                                                                         | -1.2415 | 0.0107 |
| 243435_at   | KCNQ1OT1  | KCNQ1 overlapping transcript 1                                                                                         | -1.0485 | 0.0196 |
| 243443_at   |           | Clone IMAGE:120153 mRNA sequence                                                                                       | -0.1386 | 0.049  |
| 243461_at   |           | Transcribed locus                                                                                                      | -0.6867 | 0.0222 |
| 243462_s_at |           | Transcribed locus                                                                                                      | -1.5268 | 0.0029 |
| 243480_at   |           |                                                                                                                        | -0.3083 | 0.044  |
| 243498_at   |           | Transcribed locus                                                                                                      | -0.3452 | 0.012  |
| 243504_at   |           | Transcribed locus                                                                                                      | -0.1006 | 0.0238 |
| 243514_at   |           | Transcribed locus                                                                                                      | -1.5675 | 0.0118 |
| 243524_at   |           | Full length insert cDNA YI27F12                                                                                        | -0.725  | 0.0351 |
| 243530_at   |           | Transcribed locus                                                                                                      | -0.17   | 0.0184 |
| 243543_at   |           | Transcribed locus                                                                                                      | -1.801  | 0.0272 |
| 243546_at   |           | Transcribed locus                                                                                                      | -0.6311 | 0.0016 |
| 243554_at   |           | Transcribed locus                                                                                                      | -0.2757 | 0.0098 |
| 243559_at   |           | Transcribed locus                                                                                                      | -0.4874 | 0.0076 |
| 243561_at   |           | Transcribed locus                                                                                                      | -1.1714 | 0.0438 |
| 243578_at   |           | Transcribed locus                                                                                                      | -0.4396 | 0.0022 |
| 243581_at   | LOC646470 | Similar to proteasome (prosome; macropain) 28 subunit; 3                                                               | -0.1381 | 0.0437 |
| 243589_at   | KIAA1267  | KIAA1267                                                                                                               | -1.2436 | 0.0085 |
| 243592_at   | REV1      | REV1 homolog (S. cerevisiae)                                                                                           | -0.5953 | 0.0026 |
| 243611_at   | MICALCL   | MICAL C-terminal like                                                                                                  | -0.1096 | 0.0136 |
| 243612_at   | NSD1      | Nuclear receptor binding SET domain protein 1                                                                          | -0.3818 | 0.0374 |
| 243617_at   | LOC152485 | Hypothetical protein LOC152485                                                                                         | -0.5013 | 0.0196 |
| 243618_s_at | LOC152485 | Hypothetical protein LOC152485                                                                                         | -0.8284 | 0.0328 |
| 243624_at   | PIAS2     | Protein inhibitor of activated STAT; 2                                                                                 | -0.6963 | 0.0188 |

|             |           |                                                                                              |         |        |
|-------------|-----------|----------------------------------------------------------------------------------------------|---------|--------|
| 243646_at   |           |                                                                                              | -0.9669 | 0.0087 |
| 243648_at   |           |                                                                                              | -0.9166 | 0.0188 |
| 243656_at   | LOC642852 | hypothetical LOC642852                                                                       | -0.4073 | 0.011  |
| 243689_s_at | C20orf80  | Chromosome 20 open reading frame 80                                                          | -0.151  | 0.045  |
| 243696_at   | KIAA0562  | KIAA0562                                                                                     | -0.1997 | 0.0016 |
| 243713_at   |           | Transcribed locus                                                                            | -0.2774 | 0.0146 |
| 243715_at   |           | CDNA FLJ42410 fis; clone BLADE2000938                                                        | -0.4659 | 0.0124 |
| 243736_at   |           | Transcribed locus                                                                            | -1.2253 | 0.0054 |
| 243739_at   |           | Transcribed locus                                                                            | -0.3778 | 0.0464 |
| 243759_at   | SFRS15    | Splicing factor; arginine/serine-rich 15                                                     | -0.8712 | 0.013  |
| 243763_x_at |           | Transcribed locus                                                                            | -0.2087 | 0.035  |
| 243765_at   |           | Transcribed locus                                                                            | -0.2363 | 0.0448 |
| 243768_at   |           | Transcribed locus                                                                            | -1.0171 | 0.027  |
| 243772_at   | SDCCAG8   | serologically defined colon cancer antigen 8                                                 | -0.4196 | 0.0041 |
| 243792_x_at | PTPN13    | Protein tyrosine phosphatase; non-receptor type 13 (APO-1/CD95 (Fas)-associated phosphatase) | -0.7933 | 0.0158 |
| 243801_x_at |           | Transcribed locus                                                                            | -0.4532 | 0.0147 |
| 243808_at   |           | Transcribed locus                                                                            | -1.3703 | 0.0136 |
| 243827_at   |           | Transcribed locus                                                                            | -1.0948 | 0.0186 |
| 243851_at   | RAB3GAP2  | RAB3 GTPase activating protein subunit 2 (non-catalytic)                                     | -0.9577 | 0.0202 |
| 243860_at   |           |                                                                                              | -0.2463 | 0.0089 |
| 243866_x_at |           |                                                                                              | -0.1923 | 0.0315 |
| 243874_at   | LPP       | LIM domain containing preferred translocation partner in lipoma                              | -0.4448 | 0.034  |
| 243876_at   |           | Transcribed locus                                                                            | -0.1408 | 0.0449 |
| 243895_x_at |           | Transcribed locus                                                                            | -0.6634 | 0.0058 |
| 243896_at   | C10orf79  | chromosome 10 open reading frame 79                                                          | -0.1326 | 0.0341 |
| 243908_at   |           |                                                                                              | -1.0183 | 0.0117 |
| 243920_x_at |           | MRNA; cDNA DKFZp686119109 (from clone DKFZp686119109)                                        | -0.2059 | 0.0494 |
| 243937_x_at | CTGLF2    | centaurin; gamma-like family; member 2                                                       | -0.3558 | 0.0293 |
| 243953_at   | FADS2     | fatty acid desaturase 2                                                                      | -0.4917 | 0.0063 |
| 243960_x_at |           | Transcribed locus                                                                            | -0.1253 | 0.0392 |
| 243963_at   | SDCCAG8   | Serologically defined colon cancer antigen 8                                                 | -0.7918 | 0.0266 |
| 243964_at   |           | Transcribed locus                                                                            | -0.7361 | 0.0166 |
| 243984_at   |           | Transcribed locus                                                                            | -0.1121 | 0.0452 |
| 243992_at   |           | Transcribed locus                                                                            | -1.6328 | 0.0013 |
| 244000_at   |           | CDNA FLJ14364 fis; clone HEMBA1000918                                                        | -0.8778 | 0.024  |
| 244007_at   |           |                                                                                              | -0.6135 | 0.0123 |
| 244010_at   |           | MRNA; cDNA DKFZp686J08131 (from clone DKFZp686J08131)                                        | -0.9594 | 0.0348 |
| 244057_s_at | C10orf72  | chromosome 10 open reading frame 72                                                          | -0.7178 | 0.0203 |
| 244058_at   | C10orf72  | chromosome 10 open reading frame 72                                                          | -1.0606 | 0.0365 |
| 244065_at   | FLJ37512  | similar to Contactin-associated protein-like 3 precursor (Cell recognition molecule Caspr3)  | -1.0363 | 0.0462 |
| 244070_at   | SYNE1     | spectrin repeat containing; nuclear envelope 1                                               | -0.9576 | 0.0232 |
| 244092_at   | ZRANB3    | zinc finger; RAN-binding domain containing 3                                                 | -0.1834 | 0.0272 |
| 244112_x_at |           |                                                                                              | -1.3247 | 0.0251 |
| 244132_x_at | ZNF518    | Zinc finger protein 518                                                                      | -1.1398 | 0.0057 |
| 244185_at   |           | Transcribed locus                                                                            | -1.0707 | 0.0135 |
| 244197_x_at |           |                                                                                              | -1.0028 | 0.0327 |
| 244219_at   |           | Transcribed locus                                                                            | -0.9739 | 0.0097 |
| 244224_x_at | LYNX1     | Ly6/neurotoxin 1                                                                             | -0.8334 | 0.0154 |
| 244247_at   |           | Transcribed locus                                                                            | -0.2347 | 0.0339 |
| 244265_at   |           |                                                                                              | -0.2547 | 0.0356 |
| 244300_at   |           | Transcribed locus                                                                            | -1.1555 | 0.0446 |
| 244310_at   |           | Full length insert cDNA clone YU07D01                                                        | -1.4982 | 0.0332 |
| 244320_at   | NHLRC2    | NHL repeat containing 2                                                                      | -0.2585 | 0.0283 |
| 244360_at   | FBXL17    | F-box and leucine-rich repeat protein 17                                                     | -0.4144 | 0.0283 |
| 244401_at   | LCA5      | Leber congenital amaurosis 5                                                                 | -0.3367 | 0.0041 |
| 244412_at   |           |                                                                                              | -0.1168 | 0.0091 |

|             |           |                                                                                                                                                    |         |        |
|-------------|-----------|----------------------------------------------------------------------------------------------------------------------------------------------------|---------|--------|
| 244433_at   |           |                                                                                                                                                    | -1.2724 | 0.0045 |
| 244461_at   | SPECC1    | sperm antigen with calponin homology and coiled-coil domains 1                                                                                     | -0.4222 | 0.0464 |
| 244496_at   |           | Transcribed locus                                                                                                                                  | -0.172  | 0.0075 |
| 244503_at   |           | Transcribed locus                                                                                                                                  | -0.8451 | 0.0408 |
| 244518_at   |           | Transcribed locus; moderately similar to XP_530536.1 hypothetical protein XP_530536 [Pan troglodytes]                                              | -0.1283 | 0.0294 |
| 244525_at   |           |                                                                                                                                                    | -0.1073 | 0.0323 |
| 244536_at   |           | Transcribed locus                                                                                                                                  | -0.2707 | 0.0413 |
| 244586_x_at |           |                                                                                                                                                    | -0.1592 | 0.0353 |
| 244605_at   |           |                                                                                                                                                    | -0.5972 | 0.0088 |
| 244607_at   |           | Transcribed locus                                                                                                                                  | -0.2581 | 0.0048 |
| 244622_at   | BRWD1     | Bromodomain and WD repeat domain containing 1                                                                                                      | -0.1672 | 0.0431 |
| 244633_at   |           | Transcribed locus                                                                                                                                  | -1.7987 | 0.0052 |
| 244646_at   |           | Transcribed locus                                                                                                                                  | -1.2225 | 0.0005 |
| 244655_at   | LOC644192 | Hypothetical LOC644192                                                                                                                             | -0.6363 | 0.0283 |
| 244659_at   | TRIP12    | Thyroid hormone receptor interactor 12                                                                                                             | -0.8878 | 0.0146 |
| 244661_at   | SOAT1     | sterol O-acyltransferase (acyl-Coenzyme A: cholesterol acyltransferase) 1                                                                          | -0.9655 | 0.025  |
| 244673_at   |           | Transcribed locus                                                                                                                                  | -0.161  | 0.0028 |
| 244689_at   | PPARA     | peroxisome proliferator-activated receptor alpha                                                                                                   | -0.4831 | 0.0462 |
| 244693_at   |           | Transcribed locus                                                                                                                                  | -0.2228 | 0.0146 |
| 244726_at   |           | Transcribed locus                                                                                                                                  | -1.0011 | 0.0485 |
| 244737_at   |           | Transcribed locus                                                                                                                                  | -0.1065 | 0.0414 |
| 244753_at   |           | Transcribed locus                                                                                                                                  | -1.4579 | 0.0025 |
| 244777_at   | DCP2      | DCP2 decapping enzyme homolog (S. cerevisiae)                                                                                                      | -0.7266 | 0.0395 |
| 244778_x_at |           |                                                                                                                                                    | -0.4528 | 0.0424 |
| 244791_at   |           |                                                                                                                                                    | -0.1658 | 0.0362 |
| 244801_at   | PSMB7     | Proteasome (prosome; macropain) subunit; beta type; 7                                                                                              | -1.2042 | 0.0012 |
| 244803_at   |           | Transcribed locus                                                                                                                                  | -1.6608 | 0.0138 |
| 244813_at   |           | Transcribed locus                                                                                                                                  | -0.3928 | 0.0401 |
| 244842_x_at |           | Transcribed locus                                                                                                                                  | -0.4766 | 0.0424 |
| 244868_at   |           | Transcribed locus                                                                                                                                  | -0.1954 | 0.0472 |
| 244873_s_at |           | Transcribed locus                                                                                                                                  | -0.143  | 0.0191 |
| 31637_s_at  | NR1D1     | nuclear receptor subfamily 1; group D; member 1, thyroid hormone receptor; alpha (erythroblastic leukemia viral (v-erb-a) oncogene homolog; avian) | -1.8543 | 0.0009 |
| 35617_at    | MAPK7     | mitogen-activated protein kinase 7                                                                                                                 | -0.5645 | 0.024  |
| 35626_at    | SGSH      | N-sulfoglucosamine sulfohydrolase (sulfamidase)                                                                                                    | -0.5921 | 0.0306 |
| 36019_at    | STK19     | serine/threonine kinase 19                                                                                                                         | -1.1892 | 0.0384 |
| 36829_at    | PER1      | period homolog 1 (Drosophila)                                                                                                                      | -1.0365 | 0.0285 |
| 37433_at    | PIAS2     | protein inhibitor of activated STAT; 2                                                                                                             | -0.904  | 0.021  |
| 38710_at    | OTUB1     | OTU domain; ubiquitin aldehyde binding 1                                                                                                           | -0.6239 | 0.0388 |
| 40093_at    | BCAM      | basal cell adhesion molecule (Lutheran blood group)                                                                                                | -0.3899 | 0.0321 |
| 40189_at    | SET       | SET translocation (myeloid leukemia-associated)                                                                                                    | -0.4254 | 0.0151 |
| 40284_at    | FOXA2     | forkhead box A2                                                                                                                                    | -1.1437 | 0.0492 |
| 44702_at    | SYDE1     | synapse defective 1; Rho GTPase; homolog 1 (C. elegans)                                                                                            | -0.5565 | 0.0301 |
| 49077_at    | PPME1     | protein phosphatase methylesterase 1                                                                                                               | -0.598  | 0.0324 |
| 50376_at    | ZNF444    | zinc finger protein 444                                                                                                                            | -0.4037 | 0.0251 |
| 51176_at    | MED27     | mediator complex subunit 27                                                                                                                        | -0.7743 | 0.0388 |
| 54051_at    | PKNOX1    | PBX/knotted 1 homeobox 1                                                                                                                           | -0.2281 | 0.0143 |
| 64474_g_at  | DGCR8     | DiGeorge syndrome critical region gene 8                                                                                                           | -0.6518 | 0.0457 |
| 65472_at    |           | Transcribed locus                                                                                                                                  | -0.6151 | 0.018  |
| 65884_at    | MAN1B1    | mannosidase; alpha; class 1B; member 1                                                                                                             | -0.8708 | 0.0443 |

\*For the difference in expression

**Supplemental Table 6.** Gene set enrichment analysis of ACC patients' cohort for genes related to cell proliferation (dataset GSE10927).

|    | PROBE   | GENE SYMBOL | GENE NAME                                                                                              | RANK IN GENE LIST | RANK METRIC SCORE | RUNNING ES  | CORE ENRICHMENT |
|----|---------|-------------|--------------------------------------------------------------------------------------------------------|-------------------|-------------------|-------------|-----------------|
| 1  | AIF1    | AIF1        | allograft inflammatory factor 1                                                                        | 30                | 0.417639583       | 0.014017673 | Yes             |
| 2  | SCG2    | SCG2        | secretogranin II (chromogranin C)                                                                      | 32                | 0.412185848       | 0.029264143 | Yes             |
| 3  | FABP6   | FABP6       | fatty acid binding protein 6, ileal (gastrotropin)                                                     | 50                | 0.388875127       | 0.04285596  | Yes             |
| 4  | CXCL10  | CXCL10      | chemokine (C-X-C motif) ligand 10                                                                      | 68                | 0.373264641       | 0.055868484 | Yes             |
| 5  | PTPRC   | PTPRC       | protein tyrosine phosphatase, receptor type, C                                                         | 84                | 0.357103735       | 0.06838     | Yes             |
| 6  | LST1    | LST1        | leukocyte specific transcript 1                                                                        | 97                | 0.349123091       | 0.0807434   | Yes             |
| 7  | CSF1R   | CSF1R       | colony stimulating factor 1 receptor, formerly McDonough feline sarcoma viral (v-fms) oncogene homolog | 154               | 0.321420699       | 0.08990736  | Yes             |
| 8  | RARRES3 | RARRES3     | retinoic acid receptor responder (tazarotene induced) 3                                                | 207               | 0.301735938       | 0.09853824  | Yes             |
| 9  | SYK     | SYK         | spleen tyrosine kinase                                                                                 | 297               | 0.268629342       | 0.10411458  | Yes             |
| 10 | LYN     | LYN         | v-yes-1 Yamaguchi sarcoma viral related oncogene homolog                                               | 361               | 0.254236132       | 0.11043992  | Yes             |
| 11 | FABP3   | FABP3       | fatty acid binding protein 3, muscle and heart (mammary-derived growth inhibitor)                      | 365               | 0.252116174       | 0.11964765  | Yes             |
| 12 | IL15    | IL15        | interleukin 15                                                                                         | 391               | 0.249108106       | 0.12765804  | Yes             |
| 13 | GCG     | GCG         | glucagon                                                                                               | 403               | 0.246872678       | 0.1362764   | Yes             |
| 14 | LY86    | LY86        | lymphocyte antigen 86                                                                                  | 408               | 0.246374503       | 0.14522171  | Yes             |
| 15 | RAPGEF3 | RAPGEF3     | Rap guanine nucleotide exchange factor (GEF) 3                                                         | 413               | 0.245568678       | 0.15413712  | Yes             |
| 16 | GPC4    | GPC4        | glypican 4                                                                                             | 441               | 0.241428345       | 0.16176382  | Yes             |
| 17 | CD74    | CD74        | CD74 molecule, major histocompatibility complex, class II invariant chain                              | 442               | 0.241261616       | 0.1707168   | Yes             |
| 18 | CRIP1   | CRIP1       | cysteine-rich protein 1 (intestinal)                                                                   | 453               | 0.239757761       | 0.17912047  | Yes             |
| 19 | CD33    | CD33        | CD33 molecule                                                                                          | 498               | 0.233311787       | 0.185607    | Yes             |
| 20 | TIPIN   | TIPIN       | TIMELESS interacting protein                                                                           | 502               | 0.232431293       | 0.19408426  | Yes             |
| 21 | CXCL5   | CXCL5       | chemokine (C-X-C motif) ligand 5                                                                       | 506               | 0.231562749       | 0.20252927  | Yes             |
| 22 | GNPMB   | GNPMB       | glycoprotein (transmembrane) nmb                                                                       | 538               | 0.227214798       | 0.20943111  | Yes             |
| 23 | HCLS1   | HCLS1       | hematopoietic cell-specific Lyn substrate 1                                                            | 570               | 0.221458048       | 0.21611933  | Yes             |
| 24 | IL15RA  | IL15RA      | interleukin 15 receptor, alpha                                                                         | 575               | 0.220710948       | 0.2241123   | Yes             |
| 25 | WARS    | WARS        | tryptophanyl-tRNA synthetase                                                                           | 590               | 0.218839198       | 0.23154229  | Yes             |
| 26 | CGREF1  | CGREF1      | cell growth regulator with EF-hand domain 1                                                            | 594               | 0.218516111       | 0.23950316  | Yes             |
| 27 | LAMP3   | LAMP3       | lysosomal-associated membrane protein 3                                                                | 626               | 0.214147061       | 0.24592008  | Yes             |



|    |           |           |                                                                                    |      |             |            |     |
|----|-----------|-----------|------------------------------------------------------------------------------------|------|-------------|------------|-----|
| 28 | POU3F2    | POU3F2    | POU domain, class 3, transcription factor 2                                        | 642  | 0.212912053 | 0.25308076 | Yes |
| 29 | CTF1      | CTF1      | cardiotrophin 1                                                                    | 647  | 0.212266222 | 0.26076037 | Yes |
| 30 | MATK      | MATK      | megakaryocyte-associated tyrosine kinase                                           | 693  | 0.20639278  | 0.2661986  | Yes |
| 31 | REG3A     | REG3A     | regenerating islet-derived 3 alpha                                                 | 729  | 0.202743709 | 0.27199495 | Yes |
| 32 | CD86      | CD86      | CD86 molecule                                                                      | 747  | 0.201579466 | 0.2786364  | Yes |
| 33 | LRP5      | LRP5      | low density lipoprotein receptor-related protein 5                                 | 752  | 0.200534284 | 0.28588063 | Yes |
| 34 | EBI3      | EBI3      | Epstein-Barr virus induced gene 3                                                  | 756  | 0.200241044 | 0.29316333 | Yes |
| 35 | IL6       | IL6       | interleukin 6 (interferon, beta 2)                                                 | 765  | 0.199301854 | 0.30016443 | Yes |
| 36 | CDK5      | CDK5      | cyclin-dependent kinase 5                                                          | 778  | 0.198399097 | 0.3069346  | Yes |
| 37 | TNFRSF11A | TNFRSF11A | tumor necrosis factor receptor superfamily, member 11a, NFKB activator             | 834  | 0.193767995 | 0.31141084 | Yes |
| 38 | TCIRG1    | TCIRG1    | T-cell, immune regulator 1, ATPase, H+ transporting, lysosomal V0 subunit A3       | 893  | 0.18837446  | 0.31553888 | Yes |
| 39 | IL7       | IL7       | interleukin 7                                                                      | 921  | 0.185417786 | 0.3210871  | Yes |
| 40 | FGF18     | FGF18     | fibroblast growth factor 18                                                        | 923  | 0.184986949 | 0.3279024  | Yes |
| 41 | PRDM4     | PRDM4     | PR domain containing 4                                                             | 1006 | 0.178534895 | 0.3304809  | Yes |
| 42 | CXCL1     | CXCL1     | chemokine (C-X-C motif) ligand 1 (melanoma growth stimulating activity, alpha)     | 1014 | 0.17775473  | 0.33673173 | Yes |
| 43 | MCTS1     | MCTS1     | malignant T cell amplified sequence 1                                              | 1191 | 0.164875627 | 0.33416432 | Yes |
| 44 | FIGF      | FIGF      | c-fos induced growth factor (vascular endothelial growth factor D)                 | 1219 | 0.162916735 | 0.33887753 | Yes |
| 45 | TBRG4     | TBRG4     | transforming growth factor beta regulator 4                                        | 1288 | 0.1590195   | 0.34142274 | Yes |
| 46 | CBFA2T3   | CBFA2T3   | core-binding factor, runt domain, alpha subunit 2; translocated to, 3              | 1299 | 0.158238187 | 0.34680128 | Yes |
| 47 | IGF1      | IGF1      | insulin-like growth factor 1 (somatomedin C)                                       | 1319 | 0.157541856 | 0.35170984 | Yes |
| 48 | FES       | FES       | feline sarcoma oncogene                                                            | 1357 | 0.155645043 | 0.3556597  | Yes |
| 49 | RARRES1   | RARRES1   | retinoic acid receptor responder (tazarotene induced) 1                            | 1368 | 0.155280992 | 0.3609285  | Yes |
| 50 | EIF5A2    | EIF5A2    | eukaryotic translation initiation factor 5A2                                       | 1514 | 0.148478404 | 0.3592825  | Yes |
| 51 | LRPAP1    | LRPAP1    | low density lipoprotein receptor-related protein associated protein 1              | 1538 | 0.147487625 | 0.36362055 | Yes |
| 52 | GAS6      | GAS6      | growth arrest-specific 6                                                           | 1625 | 0.142923504 | 0.3646801  | Yes |
| 53 | MXD4      | MXD4      | MAX dimerization protein 4                                                         | 1638 | 0.142366931 | 0.369371   | Yes |
| 54 | CREG1     | CREG1     | cellular repressor of E1A-stimulated genes 1                                       | 1764 | 0.13667804  | 0.36827412 | Yes |
| 55 | CDKN3     | CDKN3     | cyclin-dependent kinase inhibitor 3 (CDK2-associated dual specificity phosphatase) | 1802 | 0.134949833 | 0.371456   | Yes |
| 56 | JAG2      | JAG2      | jagged 2                                                                           | 1844 | 0.133045584 | 0.3743698  | Yes |
| 57 | MNAT1     | MNAT1     | menage a trois homolog 1, cyclin H assembly factor (Xenopus laevis)                | 2015 | 0.126640022 | 0.37067962 | Yes |
| 58 | SSTR2     | SSTR2     | somatostatin receptor 2                                                            | 2037 | 0.125963882 | 0.37431765 | Yes |
| 59 | IL6R      | IL6R      | interleukin 6 receptor                                                             | 2085 | 0.124371856 | 0.37661347 | Yes |
| 60 | APC       | APC       | adenomatosis polyposis coli                                                        | 2139 | 0.122778587 | 0.37855405 | Yes |

|    |         |         |                                                                                          |      |             |            |     |
|----|---------|---------|------------------------------------------------------------------------------------------|------|-------------|------------|-----|
| 61 | IL12RB1 | IL12RB1 | interleukin 12 receptor, beta 1                                                          | 2203 | 0.120651826 | 0.3799222  | Yes |
| 62 | PIM2    | PIM2    | pim-2 oncogene                                                                           | 2215 | 0.120263301 | 0.3838422  | Yes |
| 63 | ZNF259  | ZNF259  | zinc finger protein 259                                                                  | 2266 | 0.118319049 | 0.38576534 | Yes |
| 64 | IL18    | IL18    | interleukin 18 (interferon-gamma-inducing factor)                                        | 2305 | 0.117301494 | 0.38824296 | Yes |
| 65 | LDOC1   | LDOC1   | leucine zipper, down-regulated in cancer 1                                               | 2323 | 0.116887227 | 0.39174157 | Yes |
| 66 | MT3     | MT3     | metallothionein 3 (growth inhibitory factor (neurotrophic))                              | 2325 | 0.116869323 | 0.3960291  | Yes |
| 67 | REG1A   | REG1A   | regenerating islet-derived 1 alpha (pancreatic stone protein, pancreatic thread protein) | 2360 | 0.115648739 | 0.3986428  | Yes |
| 68 | RUNX3   | RUNX3   | runt-related transcription factor 3                                                      | 2422 | 0.113624513 | 0.39984888 | Yes |
| 69 | VTI1B   | VTI1B   | vesicle transport through interaction with t-SNAREs homolog 1B (yeast)                   | 2437 | 0.113298215 | 0.40336236 | Yes |
| 70 | KRT2    | KRT2    | keratin 2 (epidermal ichthyosis bullosa of Siemens)                                      | 2439 | 0.113283768 | 0.40751687 | Yes |
| 71 | RHOG    | RHOG    | ras homolog gene family, member G (rho G)                                                | 2449 | 0.11275737  | 0.41125703 | Yes |
| 72 | CRTAM   | CRTAM   | cytotoxic and regulatory T cell molecule                                                 | 2509 | 0.111066252 | 0.41246685 | Yes |
| 73 | DUSP22  | DUSP22  | dual specificity phosphatase 22                                                          | 2527 | 0.110483758 | 0.41572785 | Yes |
| 74 | PTK2B   | PTK2B   | PTK2B protein tyrosine kinase 2 beta                                                     | 2566 | 0.10959819  | 0.4179196  | Yes |
| 75 | TUSC2   | TUSC2   | tumor suppressor candidate 2                                                             | 2575 | 0.109338544 | 0.42158222 | Yes |
| 76 | CSF1    | CSF1    | colony stimulating factor 1 (macrophage)                                                 | 2593 | 0.108877927 | 0.42478362 | Yes |
| 77 | MTCP1   | MTCP1   | mature T-cell proliferation 1                                                            | 2597 | 0.108712189 | 0.42866978 | Yes |
| 78 | LRP1    | LRP1    | low density lipoprotein-related protein 1 (alpha-2-macroglobulin receptor)               | 2691 | 0.106187202 | 0.42802063 | Yes |
| 79 | CD3E    | CD3E    | CD3e molecule, epsilon (CD3-TCR complex)                                                 | 2730 | 0.105320625 | 0.43005365 | Yes |
| 80 | TCFL5   | TCFL5   | transcription factor-like 5 (basic helix-loop-helix)                                     | 2737 | 0.105205007 | 0.43366158 | Yes |
| 81 | PIM1    | PIM1    | pim-1 oncogene                                                                           | 2777 | 0.104350127 | 0.43560922 | Yes |
| 82 | BUB1B   | BUB1B   | BUB1 budding uninhibited by benzimidazoles 1 homolog beta (yeast)                        | 2781 | 0.104309179 | 0.43933198 | Yes |
| 83 | FLT3    | FLT3    | fms-related tyrosine kinase 3                                                            | 2818 | 0.103479892 | 0.4413954  | Yes |
| 84 | SRA1    | SRA1    | steroid receptor RNA activator 1                                                         | 2839 | 0.102847792 | 0.44422495 | Yes |
| 85 | DKC1    | DKC1    | dyskeratosis congenita 1, dyskerin                                                       | 2877 | 0.102077551 | 0.44618696 | Yes |
| 86 | S100A11 | S100A11 | S100 calcium binding protein A11                                                         | 2892 | 0.101741247 | 0.44927156 | Yes |
| 87 | NDUFS4  | NDUFS4  | NADH dehydrogenase (ubiquinone) Fe-S protein 4, 18kDa (NADH-coenzyme Q reductase)        | 2944 | 0.100510009 | 0.4504845  | Yes |
| 88 | ISG20   | ISG20   | interferon stimulated exonuclease gene 20kDa                                             | 2946 | 0.100492157 | 0.45416433 | Yes |
| 89 | MIA     | MIA     | melanoma inhibitory activity                                                             | 2956 | 0.100170568 | 0.4574374  | Yes |

|     |         |         |                                                                                         |      |             |            |     |
|-----|---------|---------|-----------------------------------------------------------------------------------------|------|-------------|------------|-----|
| 90  | CDK7    | CDK7    | cyclin-dependent kinase 7 (MO15 homolog, <i>Xenopus laevis</i> , cdk-activating kinase) | 2957 | 0.100165501 | 0.46115443 | Yes |
| 91  | SERTAD1 | SERTAD1 | SERTA domain containing 1                                                               | 3030 | 0.098670498 | 0.46126273 | Yes |
| 92  | TXN     | TXN     | thioredoxin                                                                             | 3068 | 0.097696587 | 0.46306217 | Yes |
| 93  | SIRPG   | SIRPG   | signal-regulatory protein gamma                                                         | 3209 | 0.094815619 | 0.45967153 | Yes |
| 94  | B4GALT7 | B4GALT7 | xylosylprotein beta 1,4-galactosyltransferase, polypeptide 7 (galactosyltransferase I)  | 3218 | 0.094562314 | 0.46278584 | Yes |
| 95  | BIN1    | BIN1    | bridging integrator 1                                                                   | 3315 | 0.092294231 | 0.4614731  | Yes |
| 96  | PYY     | PYY     | peptide YY                                                                              | 3340 | 0.091746904 | 0.46369332 | Yes |
| 97  | AGGF1   | AGGF1   | angiogenic factor with G patch and FHA domains 1                                        | 3381 | 0.090796053 | 0.46508864 | Yes |
| 98  | TGFA    | TGFA    | transforming growth factor, alpha                                                       | 3396 | 0.090428598 | 0.46775344 | Yes |
| 99  | CD24    | CD24    | CD24 molecule                                                                           | 3520 | 0.087696806 | 0.4649376  | Yes |
| 100 | PDAP1   | PDAP1   | PDGFA associated protein 1                                                              | 3552 | 0.08691138  | 0.4666329  | Yes |
| 101 | SCIN    | SCIN    | scinderin                                                                               | 3570 | 0.086626694 | 0.4690086  | Yes |
| 102 | IL2RA   | IL2RA   | interleukin 2 receptor, alpha                                                           | 3606 | 0.085954085 | 0.47047096 | Yes |
| 103 | IFITM1  | IFITM1  | interferon induced transmembrane protein 1 (9-27)                                       | 3634 | 0.085442178 | 0.47230917 | Yes |
| 104 | OSM     | OSM     | oncostatin M                                                                            | 3822 | 0.082188398 | 0.46613047 | Yes |
| 105 | BMP10   | BMP10   | bone morphogenetic protein 10                                                           | 3827 | 0.082052462 | 0.46897793 | Yes |
| 106 | BST2    | BST2    | bone marrow stromal cell antigen 2                                                      | 3830 | 0.081981592 | 0.4719215  | Yes |
| 107 | CDC25B  | CDC25B  | cell division cycle 25B                                                                 | 3882 | 0.08075539  | 0.47240135 | Yes |
| 108 | BTC     | BTC     | betacellulin                                                                            | 3899 | 0.080445066 | 0.47459698 | Yes |
| 109 | IL1B    | IL1B    | interleukin 1, beta                                                                     | 3932 | 0.079624265 | 0.47597253 | Yes |
| 110 | LMO1    | LMO1    | LIM domain only 1 (rhombotin 1)                                                         | 3949 | 0.079278514 | 0.47812486 | Yes |
| 111 | EEF1E1  | EEF1E1  | eukaryotic translation elongation factor 1 epsilon 1                                    | 3958 | 0.079164051 | 0.48066774 | Yes |
| 112 | NDP     | NDP     | Norrie disease (pseudoglioma)                                                           | 3968 | 0.078902021 | 0.48315156 | Yes |
| 113 | GAB1    | GAB1    | GRB2-associated binding protein 1                                                       | 4019 | 0.078047626 | 0.4835803  | Yes |
| 114 | EREG    | EREG    | epiregulin                                                                              | 4055 | 0.077592269 | 0.4847324  | Yes |
| 115 | BCAR1   | BCAR1   | breast cancer anti-estrogen resistance 1                                                | 4081 | 0.077003643 | 0.48635614 | Yes |
| 116 | GHRL    | GHRL    | ghrelin/obestatin preprohormone                                                         | 4123 | 0.076217391 | 0.4871611  | Yes |
| 117 | PRMT5   | PRMT5   | protein arginine methyltransferase 5                                                    | 4242 | 0.074583776 | 0.4841054  | Yes |
| 118 | CGRRF1  | CGRRF1  | cell growth regulator with ring finger domain 1                                         | 4270 | 0.074184991 | 0.48552585 | Yes |
| 119 | ERBB4   | ERBB4   | v-erb-a erythroblastic leukemia viral oncogene homolog 4 (avian)                        | 4334 | 0.073208384 | 0.48513344 | Yes |
| 120 | FOSL1   | FOSL1   | FOS-like antigen 1                                                                      | 4380 | 0.072465837 | 0.48560178 | Yes |
| 121 | CHRM1   | CHRM1   | cholinergic receptor, muscarinic 1                                                      | 4386 | 0.072375707 | 0.4880408  | Yes |
| 122 | ETS1    | ETS1    | v-ets erythroblastosis virus E26 oncogene homolog 1 (avian)                             | 4435 | 0.071606219 | 0.4883292  | Yes |
| 123 | CDCA7   | CDCA7   | cell division cycle associated 7                                                        | 4474 | 0.070858568 | 0.48908335 | Yes |
| 124 | PDGFA   | PDGFA   | platelet-derived growth factor alpha polypeptide                                        | 4507 | 0.07034798  | 0.49011466 | Yes |

|     |         |         |                                                                                                |      |             |            |     |
|-----|---------|---------|------------------------------------------------------------------------------------------------|------|-------------|------------|-----|
| 125 | ERF     | ERF     | Ets2 repressor factor                                                                          | 4533 | 0.069866955 | 0.4914736  | Yes |
| 126 | VIPR1   | VIPR1   | vasoactive intestinal peptide receptor 1                                                       | 4612 | 0.068627417 | 0.4901709  | Yes |
| 127 | SFN     | SFN     | stratifin                                                                                      | 4647 | 0.068043418 | 0.491018   | Yes |
| 128 | NANOG   | NANOG   | Nanog homeobox                                                                                 | 4729 | 0.066931561 | 0.48950434 | Yes |
| 129 | PPARD   | PPARD   | peroxisome proliferative activated receptor, delta                                             | 4780 | 0.0660908   | 0.48948935 | Yes |
| 130 | FGF7    | FGF7    | fibroblast growth factor 7 (keratinocyte growth factor)                                        | 4827 | 0.065578558 | 0.48965275 | Yes |
| 131 | TNFSF9  | TNFSF9  | tumor necrosis factor (ligand) superfamily, member 9                                           | 4914 | 0.064420536 | 0.48779914 | Yes |
| 132 | IFRD2   | IFRD2   | interferon-related developmental regulator 2                                                   | 4960 | 0.063831806 | 0.4879471  | Yes |
| 133 | CD160   | CD160   | CD160 molecule                                                                                 | 4963 | 0.063808598 | 0.49021626 | Yes |
| 134 | GNL3    | GNL3    | guanine nucleotide binding protein-like 3 (nucleolar)                                          | 4964 | 0.063803293 | 0.49258393 | Yes |
| 135 | EMP2    | EMP2    | epithelial membrane protein 2                                                                  | 4991 | 0.063286625 | 0.49364933 | Yes |
| 136 | PCNA    | PCNA    | proliferating cell nuclear antigen                                                             | 5032 | 0.062728748 | 0.4940031  | Yes |
| 137 | ABI1    | ABI1    | abl-interactor 1                                                                               | 5041 | 0.062629864 | 0.4959324  | Yes |
| 138 | GFI1B   | GFI1B   | growth factor independent 1B (potential regulator of CDKN1A, translocated in CML)              | 5051 | 0.062513486 | 0.49780807 | Yes |
| 139 | DTYMK   | DTYMK   | deoxythymidylate kinase (thymidylate kinase)                                                   | 5152 | 0.061107673 | 0.4951406  | Yes |
| 140 | FZD3    | FZD3    | frizzled homolog 3 (Drosophila)                                                                | 5167 | 0.060915731 | 0.4967102  | Yes |
| 141 | SLAMF1  | SLAMF1  | signaling lymphocytic activation molecule family member 1                                      | 5175 | 0.060784291 | 0.49862042 | Yes |
| 142 | SLC29A2 | SLC29A2 | solute carrier family 29 (nucleoside transporters), member 2                                   | 5195 | 0.060588785 | 0.49993113 | Yes |
| 143 | KRT16   | KRT16   | keratin 16 (focal non-epidermolytic palmoplantar keratoderma)                                  | 5259 | 0.059659317 | 0.49903592 | No  |
| 144 | BAP1    | BAP1    | BRCA1 associated protein-1 (ubiquitin carboxy-terminal hydrolase)                              | 5360 | 0.058426004 | 0.49626896 | No  |
| 145 | GLI1    | GLI1    | glioma-associated oncogene homolog 1 (zinc finger protein)                                     | 5466 | 0.056865171 | 0.4931973  | No  |
| 146 | TPX2    | TPX2    | TPX2, microtubule-associated, homolog (Xenopus laevis)                                         | 5528 | 0.056151588 | 0.49227062 | No  |
| 147 | KRT4    | KRT4    | keratin 4                                                                                      | 5544 | 0.055994038 | 0.49360824 | No  |
| 148 | CDK4    | CDK4    | cyclin-dependent kinase 4                                                                      | 5599 | 0.055354338 | 0.49299744 | No  |
| 149 | FGF4    | FGF4    | fibroblast growth factor 4 (heparin secretory transforming protein 1, Kaposi sarcoma oncogene) | 5607 | 0.055250656 | 0.49470228 | No  |
| 150 | TIMP1   | TIMP1   | TIMP metalloproteinase inhibitor 1                                                             | 5672 | 0.054395471 | 0.49356237 | No  |
| 151 | CHEK1   | CHEK1   | CHK1 checkpoint homolog (S. pombe)                                                             | 5704 | 0.053977136 | 0.4940355  | No  |
| 152 | TRIM27  | TRIM27  | tripartite motif-containing 27                                                                 | 5712 | 0.053906329 | 0.4956905  | No  |
| 153 | CKLF    | CKLF    | chemokine-like factor                                                                          | 5792 | 0.053021699 | 0.49375933 | No  |
| 154 | EPHB4   | EPHB4   | EPH receptor B4                                                                                | 5909 | 0.051464189 | 0.4899444  | No  |
| 155 | MFN2    | MFN2    | mitofusin 2                                                                                    | 5964 | 0.050914217 | 0.48916882 | No  |
| 156 | CAPNS1  | CAPNS1  | calpain, small subunit 1                                                                       | 6004 | 0.050413653 | 0.48911494 | No  |

|     |         |         |                                                                                                                |      |             |            |    |
|-----|---------|---------|----------------------------------------------------------------------------------------------------------------|------|-------------|------------|----|
| 157 | IL9     | IL9     | interleukin 9                                                                                                  | 6198 | 0.048084922 | 0.48137456 | No |
| 158 | TSPO    | TSPO    | translocator protein (18kDa)                                                                                   | 6248 | 0.04755849  | 0.4807212  | No |
| 159 | SSTR1   | SSTR1   | somatostatin receptor 1                                                                                        | 6267 | 0.047375474 | 0.48159096 | No |
| 160 | CDKN1A  | CDKN1A  | cyclin-dependent kinase inhibitor 1A (p21, Cip1)                                                               | 6336 | 0.046626952 | 0.47996536 | No |
| 161 | TGFBI   | TGFBI   | transforming growth factor, beta-induced, 68kDa                                                                | 6449 | 0.045370299 | 0.4761217  | No |
| 162 | FLT3LG  | FLT3LG  | fms-related tyrosine kinase 3 ligand                                                                           | 6451 | 0.045344133 | 0.47775504 | No |
| 163 | ICOSLG  | ICOSLG  | inducible T-cell co-stimulator ligand                                                                          | 6510 | 0.044771466 | 0.4765541  | No |
| 164 | EGFR    | EGFR    | epidermal growth factor receptor (erythroblastic leukemia viral (v-erb-b) oncogene homolog, avian)             | 6541 | 0.044434048 | 0.47672248 | No |
| 165 | FOXP3   | FOXP3   | forkhead box P3                                                                                                | 6567 | 0.044130318 | 0.47712633 | No |
| 166 | ELF4    | ELF4    | E74-like factor 4 (ets domain transcription factor)                                                            | 6572 | 0.04408519  | 0.4785649  | No |
| 167 | NCK1    | NCK1    | NCK adaptor protein 1                                                                                          | 6594 | 0.043798596 | 0.47915384 | No |
| 168 | ARHGEF2 | ARHGEF2 | rho/rac guanine nucleotide exchange factor (GEF) 2                                                             | 6603 | 0.043724392 | 0.4803816  | No |
| 169 | MYT2    | MYT2    | myelin transcription factor 2                                                                                  | 6619 | 0.043529756 | 0.4812567  | No |
| 170 | POLA1   | POLA1   | polymerase (DNA directed), alpha 1                                                                             | 6639 | 0.043274045 | 0.48192486 | No |
| 171 | NUDC    | NUDC    | nuclear distribution gene C homolog (A. nidulans)                                                              | 6650 | 0.043169428 | 0.48303333 | No |
| 172 | RAF1    | RAF1    | v-raf-1 murine leukemia viral oncogene homolog 1                                                               | 6658 | 0.043028835 | 0.48428464 | No |
| 173 | ERBB2   | ERBB2   | v-erb-b2 erythroblastic leukemia viral oncogene homolog 2, neuro/glioblastoma derived oncogene homolog (avian) | 6666 | 0.042923324 | 0.48553202 | No |
| 174 | TNFRSF8 | TNFRSF8 | tumor necrosis factor receptor superfamily, member 8                                                           | 6804 | 0.041536994 | 0.48031232 | No |
| 175 | KITLG   | KITLG   | KIT ligand                                                                                                     | 6811 | 0.041490585 | 0.4815559  | No |
| 176 | BNIP1   | BNIP1   | BCL2/adenovirus E1B 19kD interacting protein like                                                              | 6846 | 0.041197494 | 0.48140675 | No |
| 177 | PLK1    | PLK1    | polo-like kinase 1 (Drosophila)                                                                                | 6988 | 0.039680921 | 0.4759208  | No |
| 178 | ARTN    | ARTN    | artemin                                                                                                        | 6990 | 0.039660782 | 0.4773432  | No |
| 179 | KLK8    | KLK8    | kallikrein 8 (neuropsin/ovasin)                                                                                | 7001 | 0.039556656 | 0.47831762 | No |
| 180 | CNOT8   | CNOT8   | CCR4-NOT transcription complex, subunit 8                                                                      | 7100 | 0.038533125 | 0.47491112 | No |
| 181 | KLF4    | KLF4    | Kruppel-like factor 4 (gut)                                                                                    | 7179 | 0.037712399 | 0.47246122 | No |
| 182 | CTBP1   | CTBP1   | C-terminal binding protein 1                                                                                   | 7229 | 0.037242342 | 0.47142506 | No |
| 183 | INSL4   | INSL4   | insulin-like 4 (placenta)                                                                                      | 7337 | 0.036209162 | 0.46748817 | No |
| 184 | FGFBP1  | FGFBP1  | fibroblast growth factor binding protein 1                                                                     | 7348 | 0.036088277 | 0.46833387 | No |
| 185 | MAS1    | MAS1    | MAS1 oncogene                                                                                                  | 7393 | 0.035602629 | 0.4674836  | No |
| 186 | DHPS    | DHPS    | deoxyhypusine synthase                                                                                         | 7486 | 0.034767173 | 0.4642335  | No |
| 187 | FABP7   | FABP7   | fatty acid binding protein 7, brain                                                                            | 7577 | 0.033877    | 0.46104902 | No |
| 188 | NME1    | NME1    | non-metastatic cells 1, protein (NM23A) expressed in                                                           | 7661 | 0.033150781 | 0.45818308 | No |
| 189 | PPM1D   | PPM1D   | protein phosphatase 1D magnesium-dependent, delta isoform                                                      | 7743 | 0.0322464   | 0.4553823  | No |
| 190 | DLEC1   | DLEC1   | deleted in lung and esophageal cancer 1                                                                        | 7745 | 0.032233287 | 0.45652908 | No |

|     |          |          |                                                                                                           |      |             |            |    |
|-----|----------|----------|-----------------------------------------------------------------------------------------------------------|------|-------------|------------|----|
| 191 | MAGED1   | MAGED1   | melanoma antigen family D, 1                                                                              | 7800 | 0.031818885 | 0.4550449  | No |
| 192 | DERL2    | DERL2    | Der1-like domain family, member 2                                                                         | 7882 | 0.031120319 | 0.45220232 | No |
| 193 | EGR4     | EGR4     | early growth response 4                                                                                   | 7913 | 0.030857066 | 0.45186687 | No |
| 194 | CDC27    | CDC27    | cell division cycle 27                                                                                    | 7991 | 0.030025806 | 0.44918105 | No |
| 195 | S100B    | S100B    | S100 calcium binding protein B                                                                            | 8031 | 0.029640695 | 0.4483563  | No |
| 196 | UMOD     | UMOD     | uromodulin (uromucoid, Tamm-Horsfall glycoprotein)                                                        | 8067 | 0.029349381 | 0.44771814 | No |
| 197 | ERG      | ERG      | v-ets erythroblastosis virus E26 oncogene homolog (avian)                                                 | 8083 | 0.02924227  | 0.44806302 | No |
| 198 | EHF      | EHF      | ets homologous factor                                                                                     | 8124 | 0.028781939 | 0.44715706 | No |
| 199 | IGFBP4   | IGFBP4   | insulin-like growth factor binding protein 4                                                              | 8138 | 0.028690726 | 0.4475802  | No |
| 200 | CD274    | CD274    | CD274 molecule                                                                                            | 8151 | 0.028555708 | 0.44804764 | No |
| 201 | IL11     | IL11     | interleukin 11                                                                                            | 8190 | 0.028186448 | 0.44721827 | No |
| 202 | BNC1     | BNC1     | basonuclin 1                                                                                              | 8275 | 0.027553087 | 0.44409525 | No |
| 203 | DNAJA2   | DNAJA2   | DnaJ (Hsp40) homolog, subfamily A, member 2                                                               | 8329 | 0.027096184 | 0.44248515 | No |
| 204 | PAWR     | PAWR     | PRKC, apoptosis, WT1, regulator                                                                           | 8430 | 0.026108051 | 0.4385189  | No |
| 205 | PEMT     | PEMT     | phosphatidylethanolamine N-methyltransferase                                                              | 8462 | 0.025840379 | 0.43794793 | No |
| 206 | NPY      | NPY      | neuropeptide Y                                                                                            | 8468 | 0.025775822 | 0.4386577  | No |
| 207 | PDGFRA   | PDGFRA   | platelet-derived growth factor receptor, alpha polypeptide                                                | 8683 | 0.023882287 | 0.42898282 | No |
| 208 | CUL1     | CUL1     | cullin 1                                                                                                  | 8692 | 0.023796069 | 0.42947108 | No |
| 209 | ALOX15B  | ALOX15B  | arachidonate 15-lipoxygenase, type B                                                                      | 8734 | 0.023427062 | 0.42831704 | No |
| 210 | COL4A3   | COL4A3   | collagen, type IV, alpha 3 (Goodpasture antigen)                                                          | 8785 | 0.022985715 | 0.42670247 | No |
| 211 | IL9R     | IL9R     | interleukin 9 receptor                                                                                    | 8786 | 0.022981379 | 0.42755526 | No |
| 212 | CD79A    | CD79A    | CD79a molecule, immunoglobulin-associated alpha                                                           | 8866 | 0.022165043 | 0.42447907 | No |
| 213 | E4F1     | E4F1     | E4F transcription factor 1                                                                                | 8939 | 0.021480663 | 0.42172292 | No |
| 214 | CDC6     | CDC6     | CDC6 cell division cycle 6 homolog (S. cerevisiae)                                                        | 8965 | 0.021250226 | 0.42127773 | No |
| 215 | CD28     | CD28     | CD28 molecule                                                                                             | 9049 | 0.020561455 | 0.4179446  | No |
| 216 | MAPRE1   | MAPRE1   | microtubule-associated protein, RP/EB family, member 1                                                    | 9067 | 0.020425664 | 0.4178636  | No |
| 217 | TP53I11  | TP53I11  | tumor protein p53 inducible protein 11                                                                    | 9140 | 0.019741941 | 0.41504294 | No |
| 218 | IL12B    | IL12B    | interleukin 12B (natural killer cell stimulatory factor 2, cytotoxic lymphocyte maturation factor 2, p40) | 9220 | 0.019072792 | 0.41185197 | No |
| 219 | RPS4X    | RPS4X    | ribosomal protein S4, X-linked                                                                            | 9254 | 0.018756388 | 0.41091943 | No |
| 220 | MAP3K11  | MAP3K11  | mitogen-activated protein kinase kinase kinase 11                                                         | 9307 | 0.018346239 | 0.40903398 | No |
| 221 | BAI1     | BAI1     | brain-specific angiogenesis inhibitor 1                                                                   | 9341 | 0.018039593 | 0.40807483 | No |
| 222 | TNFRSF17 | TNFRSF17 | tumor necrosis factor receptor superfamily, member 17                                                     | 9369 | 0.017709721 | 0.40739954 | No |
| 223 | CDK10    | CDK10    | cyclin-dependent kinase (CDC2-like) 10                                                                    | 9382 | 0.017634554 | 0.40746173 | No |
| 224 | FTH1     | FTH1     | ferritin, heavy polypeptide 1                                                                             | 9385 | 0.017602075 | 0.40801623 | No |

|     |         |         |                                                                                                                          |       |              |            |    |
|-----|---------|---------|--------------------------------------------------------------------------------------------------------------------------|-------|--------------|------------|----|
| 225 | EPS8    | EPS8    | epidermal growth factor receptor pathway substrate 8                                                                     | 9456  | 0.017028712  | 0.40519357 | No |
| 226 | MNT     | MNT     | MAX binding protein                                                                                                      | 9484  | 0.016858581  | 0.40448672 | No |
| 227 | CDC25C  | CDC25C  | cell division cycle 25C                                                                                                  | 9644  | 0.015581897  | 0.3972181  | No |
| 228 | EMP3    | EMP3    | epithelial membrane protein 3                                                                                            | 9680  | 0.015225273  | 0.39605582 | No |
| 229 | HTR1A   | HTR1A   | 5-hydroxytryptamine (serotonin) receptor 1A                                                                              | 9772  | 0.014451792  | 0.39210117 | No |
| 230 | GPX1    | GPX1    | glutathione peroxidase 1                                                                                                 | 9795  | 0.014255677  | 0.39154446 | No |
| 231 | NPM1    | NPM1    | nucleophosmin (nucleolar phosphoprotein B23, numatrin)                                                                   | 9866  | 0.013464367  | 0.38858953 | No |
| 232 | PA2G4   | PA2G4   | proliferation-associated 2G4, 38kDa                                                                                      | 9920  | 0.012993444  | 0.3864561  | No |
| 233 | TNFRSF9 | TNFRSF9 | tumor necrosis factor receptor superfamily, member 9                                                                     | 10061 | 0.011918484  | 0.37998924 | No |
| 234 | CUL5    | CUL5    | cullin 5                                                                                                                 | 10134 | 0.011300193  | 0.3768553  | No |
| 235 | REG1B   | REG1B   | regenerating islet-derived 1 beta (pancreatic stone protein, pancreatic thread protein)                                  | 10229 | 0.010578047  | 0.37260887 | No |
| 236 | MS4A2   | MS4A2   | membrane-spanning 4-domains, subfamily A, member 2 (Fc fragment of IgE, high affinity I, receptor for; beta polypeptide) | 10258 | 0.010282603  | 0.37160861 | No |
| 237 | PRDX1   | PRDX1   | peroxiredoxin 1                                                                                                          | 10286 | 0.01006698   | 0.3706497  | No |
| 238 | HGS     | HGS     | hepatocyte growth factor-regulated tyrosine kinase substrate                                                             | 10421 | 0.008889277  | 0.36436653 | No |
| 239 | NCK2    | NCK2    | NCK adaptor protein 2                                                                                                    | 10493 | 0.008215168  | 0.36116746 | No |
| 240 | STAMPB  | STAMPB  | STAM binding protein                                                                                                     | 10527 | 0.007866614  | 0.35983083 | No |
| 241 | ATPIF1  | ATPIF1  | ATPase inhibitory factor 1                                                                                               | 10674 | 0.006650778  | 0.35287237 | No |
| 242 | NAB2    | NAB2    | NGFI-A binding protein 2 (EGR1 binding protein 2)                                                                        | 10737 | 0.006123609  | 0.35003984 | No |
| 243 | GAS8    | GAS8    | growth arrest-specific 8                                                                                                 | 10820 | 0.005366077  | 0.34619218 | No |
| 244 | RERG    | RERG    | RAS-like, estrogen-regulated, growth inhibitor                                                                           | 10864 | 0.005022839  | 0.3442565  | No |
| 245 | RBBP7   | RBBP7   | retinoblastoma binding protein 7                                                                                         | 11279 | 0.001670888  | 0.32388717 | No |
| 246 | VIP     | VIP     | vasoactive intestinal peptide                                                                                            | 11465 | 2.00E-04     | 0.31476462 | No |
| 247 | PRG4    | PRG4    | proteoglycan 4                                                                                                           | 11582 | -6.61E-04    | 0.30906442 | No |
| 248 | SSTR3   | SSTR3   | somatostatin receptor 3                                                                                                  | 11689 | -0.001711596 | 0.30389673 | No |
| 249 | CSE1L   | CSE1L   | CSE1 chromosome segregation 1-like (yeast)                                                                               | 11770 | -0.002352027 | 0.30003592 | No |
| 250 | CLEC11A | CLEC11A | C-type lectin domain family 11, member A                                                                                 | 11777 | -0.002445421 | 0.29983056 | No |
| 251 | KHDRBS1 | KHDRBS1 | KH domain containing, RNA binding, signal transduction associated 1                                                      | 11857 | -0.003084648 | 0.29604632 | No |
| 252 | RASGRP4 | RASGRP4 | RAS guanyl releasing protein 4                                                                                           | 11907 | -0.003511682 | 0.29375842 | No |
| 253 | RPS27   | RPS27   | ribosomal protein S27 (metallopanstimulin 1)                                                                             | 12061 | -0.004765213 | 0.28638455 | No |
| 254 | CHRNA10 | CHRNA10 | cholinergic receptor, nicotinic, alpha 10                                                                                | 12062 | -0.004775717 | 0.28656176 | No |
| 255 | EIF2AK2 | EIF2AK2 | eukaryotic translation initiation factor 2-alpha kinase 2                                                                | 12187 | -0.005958047 | 0.28066334 | No |
| 256 | IL27    | IL27    | interleukin 27                                                                                                           | 12249 | -0.006437371 | 0.2778918  | No |
| 257 | ING4    | ING4    | inhibitor of growth family, member 4                                                                                     | 12334 | -0.007245419 | 0.2740152  | No |

|     |          |          |                                                                                                                 |       |              |            |    |
|-----|----------|----------|-----------------------------------------------------------------------------------------------------------------|-------|--------------|------------|----|
| 258 | EDN1     | EDN1     | endothelin 1                                                                                                    | 12342 | -0.007338135 | 0.27394205 | No |
| 259 | POU1F1   | POU1F1   | POU domain, class 1, transcription factor 1 (Pit1, growth hormone factor 1)                                     | 12393 | -0.007739552 | 0.2717617  | No |
| 260 | CTNNBIP1 | CTNNBIP1 | catenin, beta interacting protein 1                                                                             | 12456 | -0.008377885 | 0.26901284 | No |
| 261 | CDKN2D   | CDKN2D   | cyclin-dependent kinase inhibitor 2D (p19, inhibits CDK4)                                                       | 12546 | -0.009077905 | 0.26495746 | No |
| 262 | ADAMTS8  | ADAMTS8  | ADAM metalloproteinase with thrombospondin type 1 motif, 8                                                      | 12561 | -0.009194675 | 0.26460776 | No |
| 263 | CUL3     | CUL3     | cullin 3                                                                                                        | 12764 | -0.010858037 | 0.25504178 | No |
| 264 | CCKBR    | CCKBR    | cholecystokinin B receptor                                                                                      | 12830 | -0.011364272 | 0.25225568 | No |
| 265 | RBBP4    | RBBP4    | retinoblastoma binding protein 4                                                                                | 12903 | -0.011987611 | 0.24914725 | No |
| 266 | ALOX12   | ALOX12   | arachidonate 12-lipoxygenase                                                                                    | 12972 | -0.012648899 | 0.24626076 | No |
| 267 | FLT4     | FLT4     | fms-related tyrosine kinase 4                                                                                   | 13024 | -0.013115887 | 0.24423058 | No |
| 268 | SPDYA    | SPDYA    | speedy homolog A (Drosophila)                                                                                   | 13146 | -0.014093602 | 0.23878211 | No |
| 269 | IL2      | IL2      | interleukin 2                                                                                                   | 13243 | -0.014918946 | 0.23459804 | No |
| 270 | TNFSF15  | TNFSF15  | tumor necrosis factor (ligand) superfamily, member 15                                                           | 13282 | -0.015302985 | 0.23329057 | No |
| 271 | TRAIIP   | TRAIIP   | TRAF interacting protein                                                                                        | 13298 | -0.015464076 | 0.23312417 | No |
| 272 | THPO     | THPO     | thrombopoietin (myeloproliferative leukemia virus oncogene ligand, megakaryocyte growth and development factor) | 13308 | -0.015555609 | 0.23325726 | No |
| 273 | MST1R    | MST1R    | macrophage stimulating 1 receptor (c-met-related tyrosine kinase)                                               | 13486 | -0.017182065 | 0.22515973 | No |
| 274 | ATP8A2   | ATP8A2   | ATPase, aminophospholipid transporter-like, Class I, type 8A, member 2                                          | 13575 | -0.018084973 | 0.22148795 | No |
| 275 | CUL2     | CUL2     | cullin 2                                                                                                        | 13631 | -0.018596528 | 0.21946375 | No |
| 276 | NRD1     | NRD1     | nardilysin (N-arginine dibasic convertase)                                                                      | 13637 | -0.018644035 | 0.21990886 | No |
| 277 | ZMYND11  | ZMYND11  | zinc finger, MYND domain containing 11                                                                          | 13667 | -0.018909942 | 0.2191794  | No |
| 278 | PRTN3    | PRTN3    | proteinase 3 (serine proteinase, neutrophil, Wegener granulomatosis autoantigen)                                | 13881 | -0.02085574  | 0.20944157 | No |
| 279 | DEC1     | DEC1     | deleted in esophageal cancer 1                                                                                  | 13961 | -0.021702399 | 0.2063482  | No |
| 280 | OSMR     | OSMR     | oncostatin M receptor                                                                                           | 14054 | -0.022494979 | 0.20264268 | No |
| 281 | VHL      | VHL      | von Hippel-Lindau tumor suppressor                                                                              | 14144 | -0.023420185 | 0.19911954 | No |
| 282 | ACHE     | ACHE     | acetylcholinesterase (Yt blood group)                                                                           | 14278 | -0.024730179 | 0.19347356 | No |
| 283 | IL4      | IL4      | interleukin 4                                                                                                   | 14283 | -0.024770334 | 0.19419536 | No |
| 284 | CAPN1    | CAPN1    | calpain 1, (mu/l) large subunit                                                                                 | 14350 | -0.0256449   | 0.19188985 | No |
| 285 | BTG4     | BTG4     | B-cell translocation gene 4                                                                                     | 14354 | -0.025684085 | 0.1926949  | No |
| 286 | OPRM1    | OPRM1    | opioid receptor, mu 1                                                                                           | 14422 | -0.026579762 | 0.19037473 | No |
| 287 | CDK3     | CDK3     | cyclin-dependent kinase 3                                                                                       | 14448 | -0.026796728 | 0.19013536 | No |
| 288 | IL3      | IL3      | interleukin 3 (colony-stimulating factor, multiple)                                                             | 14598 | -0.028505933 | 0.18383989 | No |
| 289 | DLG5     | DLG5     | discs, large homolog 5 (Drosophila)                                                                             | 14629 | -0.028868331 | 0.18343063 | No |



|     |         |         |                                                                       |       |              |            |    |
|-----|---------|---------|-----------------------------------------------------------------------|-------|--------------|------------|----|
| 290 | SESN1   | SESN1   | sestrin 1                                                             | 14669 | -0.029142667 | 0.1825874  | No |
| 291 | GML     | GML     | GPI anchored molecule like protein                                    | 14679 | -0.029251313 | 0.18322872 | No |
| 292 | EVI5    | EVI5    | ecotropic viral integration site 5                                    | 14683 | -0.029307252 | 0.18416823 | No |
| 293 | CHRM4   | CHRM4   | cholinergic receptor, muscarinic 4                                    | 14707 | -0.02950629  | 0.1841281  | No |
| 294 | CD40LG  | CD40LG  | CD40 ligand (TNF superfamily, member 5, hyper-IgM syndrome)           | 14716 | -0.029567864 | 0.18483053 | No |
| 295 | CDC14A  | CDC14A  | CDC14 cell division cycle 14 homolog A ( <i>S. cerevisiae</i> )       | 14731 | -0.029734731 | 0.18524306 | No |
| 296 | CDC16   | CDC16   | CDC16 cell division cycle 16 homolog ( <i>S. cerevisiae</i> )         | 14811 | -0.030523198 | 0.182477   | No |
| 297 | IL21    | IL21    | interleukin 21                                                        | 14812 | -0.030526513 | 0.18360981 | No |
| 298 | NAP1L1  | NAP1L1  | nucleosome assembly protein 1-like 1                                  | 14988 | -0.032896925 | 0.17619416 | No |
| 299 | LGI1    | LGI1    | leucine-rich, glioma inactivated 1                                    | 15020 | -0.03330259  | 0.1759001  | No |
| 300 | ADRA1D  | ADRA1D  | adrenergic, alpha-1D-, receptor                                       | 15052 | -0.033596143 | 0.17561693 | No |
| 301 | IGFBP7  | IGFBP7  | insulin-like growth factor binding protein 7                          | 15164 | -0.035080884 | 0.1714408  | No |
| 302 | EIF5A   | EIF5A   | eukaryotic translation initiation factor 5A                           | 15221 | -0.035918325 | 0.17001003 | No |
| 303 | ADRA1A  | ADRA1A  | adrenergic, alpha-1A-, receptor                                       | 15243 | -0.036090989 | 0.17031296 | No |
| 304 | IL31RA  | IL31RA  | interleukin 31 receptor A                                             | 15286 | -0.0365026   | 0.1695948  | No |
| 305 | FGF6    | FGF6    | fibroblast growth factor 6                                            | 15293 | -0.03665255  | 0.17065883 | No |
| 306 | FGF5    | FGF5    | fibroblast growth factor 5                                            | 15406 | -0.038000863 | 0.16654168 | No |
| 307 | MPL     | MPL     | myeloproliferative leukemia virus oncogene                            | 15480 | -0.038824845 | 0.16437982 | No |
| 308 | CUL4A   | CUL4A   | cullin 4A                                                             | 15528 | -0.039594535 | 0.16352963 | No |
| 309 | SSR1    | SSR1    | signal sequence receptor, alpha (translocon-associated protein alpha) | 15716 | -0.041917346 | 0.1558565  | No |
| 310 | SSTR5   | SSTR5   | somatostatin receptor 5                                               | 15720 | -0.042039022 | 0.15726848 | No |
| 311 | ODZ1    | ODZ1    | odz, odd Oz/ten-m homolog 1 ( <i>Drosophila</i> )                     | 15926 | -0.044874627 | 0.14881676 | No |
| 312 | CD47    | CD47    | CD47 molecule                                                         | 15977 | -0.045414444 | 0.1480345  | No |
| 313 | IL5RA   | IL5RA   | interleukin 5 receptor, alpha                                         | 16002 | -0.045741022 | 0.14854749 | No |
| 314 | GNRH1   | GNRH1   | gonadotropin-releasing hormone 1 (luteinizing-releasing hormone)      | 16011 | -0.045848105 | 0.14985405 | No |
| 315 | LIF     | LIF     | leukemia inhibitory factor (cholinergic differentiation factor)       | 16138 | -0.047530808 | 0.14539964 | No |
| 316 | SFTPD   | SFTPD   | surfactant, pulmonary-associated protein D                            | 16263 | -0.049677555 | 0.14112361 | No |
| 317 | IL29    | IL29    | interleukin 29 (interferon, lambda 1)                                 | 16385 | -0.051480509 | 0.13706252 | No |
| 318 | MARK4   | MARK4   | MAP/microtubule affinity-regulating kinase 4                          | 16506 | -0.053092182 | 0.1331106  | No |
| 319 | ZFP36L2 | ZFP36L2 | zinc finger protein 36, C3H type-like 2                               | 16634 | -0.055549227 | 0.1289044  | No |
| 320 | TGFBR2  | TGFBR2  | transforming growth factor, beta receptor II (70/80kDa)               | 16656 | -0.055906355 | 0.12994266 | No |
| 321 | PROK2   | PROK2   | prokineticin 2                                                        | 16676 | -0.056150336 | 0.13108867 | No |
| 322 | CDK9    | CDK9    | cyclin-dependent kinase 9 (CDC2-related kinase)                       | 16765 | -0.057601675 | 0.12888332 | No |
| 323 | CDK2    | CDK2    | cyclin-dependent kinase 2                                             | 16781 | -0.057828575 | 0.13028902 | No |
| 324 | ADRA1B  | ADRA1B  | adrenergic, alpha-1B-, receptor                                       | 16789 | -0.058045365 | 0.13209757 | No |

|     |         |         |                                                                                                            |       |              |             |    |
|-----|---------|---------|------------------------------------------------------------------------------------------------------------|-------|--------------|-------------|----|
| 325 | ACVRL1  | ACVRL1  | activin A receptor type II-like 1                                                                          | 16829 | -0.058583293 | 0.13234685  | No |
| 326 | ENPP7   | ENPP7   | ectonucleotide pyrophosphatase/phosphodiesterase 7                                                         | 16884 | -0.059567381 | 0.13189238  | No |
| 327 | TM4SF4  | TM4SF4  | transmembrane 4 L six family member 4                                                                      | 16944 | -0.060507055 | 0.13122603  | No |
| 328 | PRKRIR  | PRKRIR  | protein-kinase, interferon-inducible double stranded RNA dependent inhibitor, repressor of (P58 repressor) | 17022 | -0.061765429 | 0.12971805  | No |
| 329 | SSTR4   | SSTR4   | somatostatin receptor 4                                                                                    | 17025 | -0.061788313 | 0.13191226  | No |
| 330 | GLP2R   | GLP2R   | glucagon-like peptide 2 receptor                                                                           | 17043 | -0.062120415 | 0.13337852  | No |
| 331 | PLG     | PLG     | plasminogen                                                                                                | 17230 | -0.065527178 | 0.12663087  | No |
| 332 | CDK5R1  | CDK5R1  | cyclin-dependent kinase 5, regulatory subunit 1 (p35)                                                      | 17444 | -0.069651715 | 0.11870382  | No |
| 333 | CDKN2B  | CDKN2B  | cyclin-dependent kinase inhibitor 2B (p15, inhibits CDK4)                                                  | 17591 | -0.072521634 | 0.114189774 | No |
| 334 | PTH1H   | PTH1H   | parathyroid hormone-like hormone                                                                           | 17612 | -0.073002838 | 0.11591182  | No |
| 335 | SPHK1   | SPHK1   | sphingosine kinase 1                                                                                       | 17947 | -0.080282651 | 0.10240778  | No |
| 336 | TACSTD2 | TACSTD2 | tumor-associated calcium signal transducer 2                                                               | 17984 | -0.081188291 | 0.10364397  | No |
| 337 | EPS15   | EPS15   | epidermal growth factor receptor pathway substrate 15                                                      | 18309 | -0.089258492 | 0.09096653  | No |
| 338 | ADRA2A  | ADRA2A  | adrenergic, alpha-2A-, receptor                                                                            | 18347 | -0.090195641 | 0.09248762  | No |
| 339 | TBRG1   | TBRG1   | transforming growth factor beta regulator 1                                                                | 18373 | -0.091067396 | 0.09463327  | No |
| 340 | PRL     | PRL     | prolactin                                                                                                  | 18526 | -0.095965244 | 0.09069309  | No |
| 341 | MDM2    | MDM2    | Mdm2, transformed 3T3 cell double minute 2, p53 binding protein (mouse)                                    | 18570 | -0.097484469 | 0.092188545 | No |
| 342 | CSF3    | CSF3    | colony stimulating factor 3 (granulocyte)                                                                  | 18606 | -0.098556504 | 0.094118595 | No |
| 343 | IGF1R   | IGF1R   | insulin-like growth factor 1 receptor                                                                      | 19164 | -0.120856248 | 0.07111493  | No |

**Supplemental Table 7.** Gene set enrichment analysis of ACC patients' cohort for genes related to the negative regulation of cell apoptosis (dataset GSE10927).

|    | PROBE     | GENE SYMBOL | GENE NAME                                                                                                        | RANK IN GENE LIST | RANK METRIC SCORE | RUNNING ES | CORE ENRICHMENT |
|----|-----------|-------------|------------------------------------------------------------------------------------------------------------------|-------------------|-------------------|------------|-----------------|
| 1  | SCG2      | SCG2        | secretogranin II (chromogranin C)                                                                                | 32                | 0.412185848       | 0.05129418 | Yes             |
| 2  | GSTP1     | GSTP1       | glutathione S-transferase pi                                                                                     | 89                | 0.356068641       | 0.09422191 | Yes             |
| 3  | TNFAIP8   | TNFAIP8     | tumor necrosis factor, alpha-induced protein 8                                                                   | 321               | 0.261226714       | 0.11645308 | Yes             |
| 4  | IL2RB     | IL2RB       | interleukin 2 receptor, beta                                                                                     | 410               | 0.246092916       | 0.14371789 | Yes             |
| 5  | CD74      | CD74        | CD74 molecule, major histocompatibility complex, class II invariant chain                                        | 442               | 0.241261616       | 0.17314312 | Yes             |
| 6  | ANXA1     | ANXA1       | annexin A1                                                                                                       | 512               | 0.230224475       | 0.19929974 | Yes             |
| 7  | BCL2A1    | BCL2A1      | BCL2-related protein A1                                                                                          | 617               | 0.21557413        | 0.22187077 | Yes             |
| 8  | BIRC3     | BIRC3       | baculoviral IAP repeat-containing 3                                                                              | 680               | 0.208185136       | 0.24554268 | Yes             |
| 9  | SNCA      | SNCA        | synuclein, alpha (non A4 component of amyloid precursor)                                                         | 718               | 0.203477532       | 0.2698302  | Yes             |
| 10 | CCL2      | CCL2        | chemokine (C-C motif) ligand 2                                                                                   | 746               | 0.201598182       | 0.29436445 | Yes             |
| 11 | IL6       | IL6         | interleukin 6 (interferon, beta 2)                                                                               | 765               | 0.199301854       | 0.31904316 | Yes             |
| 12 | IL7       | IL7         | interleukin 7                                                                                                    | 921               | 0.185417786       | 0.3352599  | Yes             |
| 13 | FAIM3     | FAIM3       | Fas apoptotic inhibitory molecule 3                                                                              | 1164              | 0.166716486       | 0.3448355  | Yes             |
| 14 | SEMA4D    | SEMA4D      | sema domain, immunoglobulin domain (Ig), transmembrane domain (TM) and short cytoplasmic domain, (semaphorin) 4D | 1178              | 0.165729195       | 0.36545303 | Yes             |
| 15 | ASNS      | ASNS        | asparagine synthetase                                                                                            | 1400              | 0.153782502       | 0.37439427 | Yes             |
| 16 | NFKB1     | NFKB1       | nuclear factor of kappa light polypeptide gene enhancer in B-cells 1 (p105)                                      | 1487              | 0.149521858       | 0.38937324 | Yes             |
| 17 | CLN3      | CLN3        | ceroid-lipofuscinosis, neuronal 3, juvenile (Batten, Spielmeier-Vogt disease)                                    | 1639              | 0.142353937       | 0.40026295 | Yes             |
| 18 | BCL3      | BCL3        | B-cell CLL/lymphoma 3                                                                                            | 1853              | 0.132650033       | 0.40688455 | Yes             |
| 19 | RASA1     | RASA1       | RAS p21 protein activator (GTPase activating protein) 1                                                          | 1909              | 0.130131677       | 0.42088902 | Yes             |
| 20 | BCL2L10   | BCL2L10     | BCL2-like 10 (apoptosis facilitator)                                                                             | 2025              | 0.126336172       | 0.43148053 | Yes             |
| 21 | TNFRSF10D | TNFRSF10D   | tumor necrosis factor receptor superfamily, member 10d, decoy with truncated death domain                        | 2042              | 0.125862718       | 0.44683963 | Yes             |
| 22 | BAG1      | BAG1        | BCL2-associated athanogene                                                                                       | 2074              | 0.12485373        | 0.4613378  | Yes             |
| 23 | ANXA4     | ANXA4       | annexin A4                                                                                                       | 2108              | 0.123851568       | 0.47560993 | Yes             |
| 24 | PIM1      | PIM1        | pim-1 oncogene                                                                                                   | 2777              | 0.104350127       | 0.4564118  | Yes             |
| 25 | SOCS3     | SOCS3       | suppressor of cytokine signaling 3                                                                               | 2950              | 0.100399412       | 0.46089748 | Yes             |
| 26 | FAS       | FAS         | Fas (TNF receptor superfamily, member 6)                                                                         | 2988              | 0.099542752       | 0.47185737 | Yes             |
| 27 | KRT18     | KRT18       | keratin 18                                                                                                       | 3059              | 0.097936563       | 0.48100188 | Yes             |
| 28 | BNIP1     | BNIP1       | BCL2/adenovirus E1B 19kDa interacting protein 1                                                                  | 3276              | 0.093235798       | 0.48242304 | Yes             |
| 29 | AVEN      | AVEN        | apoptosis, caspase activation inhibitor                                                                          | 3285              | 0.092934825       | 0.49394995 | Yes             |
| 30 | CIAPIN1   | CIAPIN1     | cytokine induced apoptosis inhibitor 1                                                                           | 3759              | 0.083455123       | 0.4815828  | Yes             |
| 31 | DAD1      | DAD1        | defender against cell death 1                                                                                    | 3901              | 0.080434635       | 0.48502025 | Yes             |

|    |         |         |                                                                           |       |              |            |     |
|----|---------|---------|---------------------------------------------------------------------------|-------|--------------|------------|-----|
| 32 | PROC    | PROC    | protein C (inactivator of coagulation factors Va and VIIIa)               | 3965  | 0.079056174  | 0.4920851  | Yes |
| 33 | GHRL    | GHRL    | ghrelin/obestatin preprohormone                                           | 4123  | 0.076217391  | 0.49420148 | Yes |
| 34 | HSPB1   | HSPB1   | heat shock 27kDa protein 1                                                | 4289  | 0.073950745  | 0.495637   | Yes |
| 35 | CLCF1   | CLCF1   | cardiotrophin-like cytokine factor 1                                      | 4392  | 0.072245598  | 0.49992648 | Yes |
| 36 | SH3GLB1 | SH3GLB1 | SH3-domain GRB2-like endophilin B1                                        | 4572  | 0.069263041  | 0.5000781  | Yes |
| 37 | TIAF1   | TIAF1   | TGFB1-induced anti-apoptotic factor 1                                     | 4725  | 0.067000449  | 0.5012564  | Yes |
| 38 | PIK3R2  | PIK3R2  | phosphoinositide-3-kinase, regulatory subunit 2 (p85 beta)                | 4833  | 0.065514341  | 0.5044389  | Yes |
| 39 | BCL2L2  | BCL2L2  | BCL2-like 2                                                               | 4845  | 0.065320849  | 0.51227856 | Yes |
| 40 | ACVR1   | ACVR1   | activin A receptor, type I                                                | 5050  | 0.062554345  | 0.51035064 | Yes |
| 41 | BCL2L1  | BCL2L1  | BCL2-like 1                                                               | 5232  | 0.060128078  | 0.50923336 | Yes |
| 42 | TXNDC5  | TXNDC5  | thioredoxin domain containing 5                                           | 5399  | 0.057882886  | 0.5085597  | Yes |
| 43 | PAX7    | PAX7    | paired box gene 7                                                         | 5463  | 0.056909494  | 0.5127847  | Yes |
| 44 | API5    | API5    | apoptosis inhibitor 5                                                     | 5637  | 0.054723926  | 0.5113646  | No  |
| 45 | BCL10   | BCL10   | B-cell CLL/lymphoma 10                                                    | 5923  | 0.051277772  | 0.50404024 | No  |
| 46 | HBXIP   | HBXIP   | hepatitis B virus x interacting protein                                   | 6341  | 0.046549723  | 0.48967186 | No  |
| 47 | HSPA1B  | HSPA1B  | heat shock 70kDa protein 1B                                               | 6815  | 0.041459765  | 0.4719196  | No  |
| 48 | DFFA    | DFFA    | DNA fragmentation factor, 45kDa, alpha polypeptide                        | 6864  | 0.041000921  | 0.47483617 | No  |
| 49 | HDAC3   | HDAC3   | histone deacetylase 3                                                     | 7835  | 0.031549904  | 0.431574   | No  |
| 50 | TNFSF18 | TNFSF18 | tumor necrosis factor (ligand) superfamily, member 18                     | 7862  | 0.031310402  | 0.4343209  | No  |
| 51 | TRIP1   | TRIP1   | TP53 regulated inhibitor of apoptosis 1                                   | 8333  | 0.027055824  | 0.41486794 | No  |
| 52 | CD28    | CD28    | CD28 molecule                                                             | 9049  | 0.020561455  | 0.3826333  | No  |
| 53 | BCL2    | BCL2    | B-cell CLL/lymphoma 2                                                     | 9221  | 0.019069314  | 0.37673873 | No  |
| 54 | BRE     | BRE     | brain and reproductive organ-expressed (TNFRSF1A modulator)               | 9399  | 0.017475726  | 0.37034717 | No  |
| 55 | BECN1   | BECN1   | beclin 1 (coiled-coil, myosin-like BCL2 interacting protein)              | 9692  | 0.015112576  | 0.35804397 | No  |
| 56 | GPX1    | GPX1    | glutathione peroxidase 1                                                  | 9795  | 0.014255677  | 0.35489732 | No  |
| 57 | NPM1    | NPM1    | nucleophosmin (nucleolar phosphoprotein B23, numatrin)                    | 9866  | 0.013464367  | 0.3532099  | No  |
| 58 | ARHGDI1 | ARHGDI1 | Rho GDP dissociation inhibitor (GDI) alpha                                | 10033 | 0.012189656  | 0.346677   | No  |
| 59 | BAG4    | BAG4    | BCL2-associated athanogene 4                                              | 10130 | 0.011358825  | 0.34345156 | No  |
| 60 | TNF     | TNF     | tumor necrosis factor (TNF superfamily, member 2)                         | 10388 | 0.009188766  | 0.33209568 | No  |
| 61 | HDAC1   | HDAC1   | histone deacetylase 1                                                     | 10501 | 0.008154483  | 0.327679   | No  |
| 62 | OPA1    | OPA1    | optic atrophy 1 (autosomal dominant)                                      | 10891 | 0.004681752  | 0.30930743 | No  |
| 63 | SOD1    | SOD1    | superoxide dismutase 1, soluble (amyotrophic lateral sclerosis 1 (adult)) | 11050 | 0.00345061   | 0.3020441  | No  |
| 64 | TPT1    | TPT1    | tumor protein, translationally-controlled 1                               | 11101 | 0.003009678  | 0.2999915  | No  |
| 65 | IFI6    | IFI6    | interferon, alpha-inducible protein 6                                     | 11512 | -1.57E-04    | 0.28001556 | No  |
| 66 | CFL1    | CFL1    | cofilin 1 (non-muscle)                                                    | 11526 | -2.45E-04    | 0.27941296 | No  |
| 67 | BAX     | BAX     | BCL2-associated X protein                                                 | 11707 | -0.00183459  | 0.27086943 | No  |
| 68 | AATF    | AATF    | apoptosis antagonizing transcription factor                               | 11783 | -0.002492361 | 0.26753122 | No  |
| 69 | PRDX2   | PRDX2   | peroxiredoxin 2                                                           | 11915 | -0.003575593 | 0.2616007  | No  |
| 70 | ERC1    | ERC1    | ELKS/RAB6-interacting/CAST family member 1                                | 12205 | -0.006080984 | 0.24828567 | No  |

|     |          |          |                                                                                                                                         |       |              |             |    |
|-----|----------|----------|-----------------------------------------------------------------------------------------------------------------------------------------|-------|--------------|-------------|----|
| 71  | CRYAA    | CRYAA    | crystallin, alpha A                                                                                                                     | 12294 | -0.006901044 | 0.24487875  | No |
| 72  | NME5     | NME5     | non-metastatic cells 5, protein expressed in (nucleoside-diphosphate kinase)                                                            | 12416 | -0.007966447 | 0.23999901  | No |
| 73  | CDKN2D   | CDKN2D   | cyclin-dependent kinase inhibitor 2D (p19, inhibits CDK4)                                                                               | 12546 | -0.009077905 | 0.23487161  | No |
| 74  | NUP62    | NUP62    | nucleoporin 62kDa                                                                                                                       | 12656 | -0.010023491 | 0.23084089  | No |
| 75  | PPT1     | PPT1     | palmitoyl-protein thioesterase 1 (ceroid-lipofuscinosis, neuronal 1, infantile)                                                         | 12938 | -0.012385988 | 0.21872452  | No |
| 76  | BRAF     | BRAF     | v-raf murine sarcoma viral oncogene homolog B1                                                                                          | 12968 | -0.012630679 | 0.2189298   | No |
| 77  | ALOX12   | ALOX12   | arachidonate 12-lipoxygenase                                                                                                            | 12972 | -0.012648899 | 0.22040546  | No |
| 78  | IL2      | IL2      | interleukin 2                                                                                                                           | 13243 | -0.014918946 | 0.20915036  | No |
| 79  | RELA     | RELA     | v-rel reticuloendotheliosis viral oncogene homolog A, nuclear factor of kappa light polypeptide gene enhancer in B-cells 3, p65 (avian) | 13530 | -0.017533606 | 0.1974502   | No |
| 80  | IL4      | IL4      | interleukin 4                                                                                                                           | 14283 | -0.024770334 | 0.16395076  | No |
| 81  | MCL1     | MCL1     | myeloid cell leukemia sequence 1 (BCL2-related)                                                                                         | 14324 | -0.025252141 | 0.16523801  | No |
| 82  | MPO      | MPO      | myeloperoxidase                                                                                                                         | 14463 | -0.026930654 | 0.16196096  | No |
| 83  | IL3      | IL3      | interleukin 3 (colony-stimulating factor, multiple)                                                                                     | 14598 | -0.028505933 | 0.15908098  | No |
| 84  | CD40LG   | CD40LG   | CD40 ligand (TNF superfamily, member 5, hyper-IgM syndrome)                                                                             | 14716 | -0.029567864 | 0.15716629  | No |
| 85  | RTN4     | RTN4     | reticulon 4                                                                                                                             | 14724 | -0.029670775 | 0.16062959  | No |
| 86  | BFAR     | BFAR     | bifunctional apoptosis regulator                                                                                                        | 14958 | -0.032480717 | 0.15343097  | No |
| 87  | ANXA5    | ANXA5    | annexin A5                                                                                                                              | 15041 | -0.033488795 | 0.15372604  | No |
| 88  | ALB      | ALB      | albumin                                                                                                                                 | 15067 | -0.03378341  | 0.15683883  | No |
| 89  | TAX1BP1  | TAX1BP1  | Tax1 (human T-cell leukemia virus type I) binding protein 1                                                                             | 15186 | -0.035461523 | 0.15563111  | No |
| 90  | IER3     | IER3     | immediate early response 3                                                                                                              | 15440 | -0.038352467 | 0.14821002  | No |
| 91  | HSP90B1  | HSP90B1  | heat shock protein 90kDa beta (Grp94), member 1                                                                                         | 15511 | -0.039279148 | 0.14983284  | No |
| 92  | PRKCZ    | PRKCZ    | protein kinase C, zeta                                                                                                                  | 15712 | -0.041855119 | 0.14544575  | No |
| 93  | SERPINB2 | SERPINB2 | serpin peptidase inhibitor, clade B (ovalbumin), member 2                                                                               | 15863 | -0.044071179 | 0.14378138  | No |
| 94  | AKT1S1   | AKT1S1   | AKT1 substrate 1 (proline-rich)                                                                                                         | 16023 | -0.046010613 | 0.14192677  | No |
| 95  | GSK3B    | GSK3B    | glycogen synthase kinase 3 beta                                                                                                         | 16466 | -0.052606355 | 0.12711574  | No |
| 96  | NOL3     | NOL3     | nucleolar protein 3 (apoptosis repressor with CARD domain)                                                                              | 16631 | -0.055510413 | 0.12623544  | No |
| 97  | PROK2    | PROK2    | prokineticin 2                                                                                                                          | 16676 | -0.056150336 | 0.1312897   | No |
| 98  | DDAH2    | DDAH2    | dimethylarginine dimethylaminohydrolase 2                                                                                               | 16918 | -0.060158063 | 0.12725002  | No |
| 99  | SPHK1    | SPHK1    | sphingosine kinase 1                                                                                                                    | 17947 | -0.080282651 | 0.08740814  | No |
| 100 | CFLAR    | CFLAR    | CASP8 and FADD-like apoptosis regulator                                                                                                 | 17979 | -0.081036508 | 0.09628761  | No |
| 101 | IGF1R    | IGF1R    | insulin-like growth factor 1 receptor                                                                                                   | 19164 | -0.120856248 | 0.054040246 | No |
| 102 | SOCS2    | SOCS2    | suppressor of cytokine signaling 2                                                                                                      | 19272 | -0.12625657  | 0.06501171  | No |

**Supplemental Table 8.** Gene set enrichment analysis of ACC patients' cohort for genes related to cell proliferation (dataset GSEA49278).

|    | PROBE    | GENE SYMBOL | GENE NAME                                                                                                                | RANK IN GENE LIST | RANK METRIC SCORE | RUNNING ES  | CORE ENRICHMENT |
|----|----------|-------------|--------------------------------------------------------------------------------------------------------------------------|-------------------|-------------------|-------------|-----------------|
| 1  | SCG2     | SCG2        | secretogranin II (chromogranin C)                                                                                        | 88                | 0.528024495       | 0.012585526 | Yes             |
| 2  | IGF1     | IGF1        | insulin-like growth factor 1 (somatomedin C)                                                                             | 165               | 0.453109026       | 0.023362676 | Yes             |
| 3  | NANOG    | NANOG       | Nanog homeobox                                                                                                           | 197               | 0.428571761       | 0.035473235 | Yes             |
| 4  | CXCL10   | CXCL10      | chemokine (C-X-C motif) ligand 10                                                                                        | 239               | 0.407573014       | 0.046450302 | Yes             |
| 5  | FZD3     | FZD3        | frizzled homolog 3 (Drosophila)                                                                                          | 259               | 0.39568767        | 0.05808276  | Yes             |
| 6  | TGFBI    | TGFBI       | transforming growth factor, beta-induced, 68kDa                                                                          | 266               | 0.393182337       | 0.07024548  | Yes             |
| 7  | ODZ1     | ODZ1        | odz, odd Oz/ten-m homolog 1(Drosophila)                                                                                  | 285               | 0.386294693       | 0.08162754  | Yes             |
| 8  | EIF5A2   | EIF5A2      | eukaryotic translation initiation factor 5A2                                                                             | 341               | 0.360658169       | 0.090463325 | Yes             |
| 9  | SCIN     | SCIN        | scinderin                                                                                                                | 405               | 0.345200032       | 0.09843476  | Yes             |
| 10 | IL7      | IL7         | interleukin 7                                                                                                            | 425               | 0.340098083       | 0.10830783  | Yes             |
| 11 | RARRES3  | RARRES3     | retinoic acid receptor responder (tazarotene induced) 3                                                                  | 466               | 0.32978338        | 0.11686978  | Yes             |
| 12 | MS4A2    | MS4A2       | membrane-spanning 4-domains, subfamily A, member 2 (Fc fragment of IgE, high affinity I, receptor for; beta polypeptide) | 467               | 0.329689175       | 0.1273043   | Yes             |
| 13 | CD3E     | CD3E        | CD3e molecule, epsilon (CD3-TCR complex)                                                                                 | 639               | 0.293033749       | 0.12856069  | Yes             |
| 14 | TM4SF4   | TM4SF4      | transmembrane 4 L six family member 4                                                                                    | 752               | 0.272762805       | 0.13194196  | Yes             |
| 15 | KITLG    | KITLG       | KIT ligand                                                                                                               | 757               | 0.271673501       | 0.14035276  | Yes             |
| 16 | PTPRC    | PTPRC       | protein tyrosine phosphatase, receptor type, C                                                                           | 779               | 0.270001113       | 0.1479135   | Yes             |
| 17 | LDOC1    | LDOC1       | leucine zipper, down-regulated in cancer 1                                                                               | 784               | 0.269550681       | 0.15625711  | Yes             |
| 18 | TNFSF15  | TNFSF15     | tumor necrosis factor (ligand) superfamily, member 15                                                                    | 788               | 0.269046128       | 0.16463163  | Yes             |
| 19 | TNFRSF17 | TNFRSF17    | tumor necrosis factor receptor superfamily, member 17                                                                    | 792               | 0.268756866       | 0.17299701  | Yes             |
| 20 | APPL2    | null        | null                                                                                                                     | 954               | 0.250093699       | 0.17336325  | Yes             |
| 21 | EPS8     | EPS8        | epidermal growth factor receptor pathway substrate 8                                                                     | 986               | 0.247000024       | 0.17972715  | Yes             |
| 22 | TCFL5    | TCFL5       | transcription factor-like 5 (basic helix-loop-helix)                                                                     | 1005              | 0.244927987       | 0.18663502  | Yes             |
| 23 | LYN      | LYN         | v-yes-1 Yamaguchi sarcoma viral related oncogene homolog                                                                 | 1046              | 0.240037933       | 0.19235656  | Yes             |
| 24 | LY86     | LY86        | lymphocyte antigen 86                                                                                                    | 1059              | 0.23850809        | 0.19934256  | Yes             |
| 25 | CSF1     | CSF1        | colony stimulating factor 1 (macrophage)                                                                                 | 1124              | 0.232157439       | 0.20368937  | Yes             |
| 26 | FABP3    | FABP3       | fatty acid binding protein 3, muscle and heart (mammary-derived growth inhibitor)                                        | 1133              | 0.231597304       | 0.2106442   | Yes             |
| 27 | PAWR     | PAWR        | PRKC, apoptosis, WT1, regulator                                                                                          | 1137              | 0.2314042         | 0.21782738  | Yes             |
| 28 | FABP6    | FABP6       | fatty acid binding protein 6, ileal (gastrotropin)                                                                       | 1222              | 0.224540159       | 0.22099532  | Yes             |
| 29 | AIF1     | AIF1        | allograft inflammatory factor 1                                                                                          | 1259              | 0.221519202       | 0.2263183   | Yes             |
| 30 | MCTS1    | MCTS1       | malignant T cell amplified sequence 1                                                                                    | 1337              | 0.215719551       | 0.2295353   | Yes             |

|    |        |        |                                                                                                        |      |             |            |     |
|----|--------|--------|--------------------------------------------------------------------------------------------------------|------|-------------|------------|-----|
| 31 | PTHLH  | PTHLH  | parathyroid hormone-like hormone                                                                       | 1339 | 0.215710402 | 0.23631555 | Yes |
| 32 | NDP    | NDP    | Norrie disease (pseudoglioma)                                                                          | 1402 | 0.210322991 | 0.24006507 | Yes |
| 33 | IL15   | IL15   | interleukin 15                                                                                         | 1412 | 0.209720567 | 0.24628063 | Yes |
| 34 | BST2   | BST2   | bone marrow stromal cell antigen 2                                                                     | 1417 | 0.209491074 | 0.25272337 | Yes |
| 35 | EHF    | EHF    | ets homologous factor                                                                                  | 1543 | 0.201949224 | 0.25325388 | Yes |
| 36 | LRPAP1 | LRPAP1 | low density lipoprotein receptor-related protein associated protein 1                                  | 1547 | 0.201800555 | 0.25950012 | Yes |
| 37 | EMP3   | EMP3   | epithelial membrane protein 3                                                                          | 1562 | 0.200570658 | 0.26519164 | Yes |
| 38 | CD74   | CD74   | CD74 molecule, major histocompatibility complex, class II invariant chain                              | 1578 | 0.199223205 | 0.27079365 | Yes |
| 39 | EDN1   | EDN1   | endothelin 1                                                                                           | 1596 | 0.198184133 | 0.27626896 | Yes |
| 40 | CD274  | CD274  | CD274 molecule                                                                                         | 1625 | 0.196526065 | 0.28117603 | Yes |
| 41 | SYK    | SYK    | spleen tyrosine kinase                                                                                 | 1726 | 0.190620273 | 0.2825202  | Yes |
| 42 | ATP8A2 | ATP8A2 | ATPase, aminophospholipid transporter-like, Class I, type 8A, member 2                                 | 1759 | 0.188890845 | 0.28699806 | Yes |
| 43 | SSTR1  | SSTR1  | somatostatin receptor 1                                                                                | 1764 | 0.188562289 | 0.29277843 | Yes |
| 44 | CSF1R  | CSF1R  | colony stimulating factor 1 receptor, formerly McDonough feline sarcoma viral (v-fms) oncogene homolog | 1850 | 0.184305429 | 0.29462606 | Yes |
| 45 | ERBB4  | ERBB4  | v-erb-a erythroblastic leukemia viral oncogene homolog 4 (avian)                                       | 1891 | 0.182185233 | 0.2985166  | Yes |
| 46 | TNFSF9 | TNFSF9 | tumor necrosis factor (ligand) superfamily, member 9                                                   | 1944 | 0.17837213  | 0.30172378 | Yes |
| 47 | NDUFS4 | NDUFS4 | NADH dehydrogenase (ubiquinone) Fe-S protein 4, 18kDa (NADH-coenzyme Q reductase)                      | 1968 | 0.177008122 | 0.30624756 | Yes |
| 48 | RERG   | RERG   | RAS-like, estrogen-regulated, growth inhibitor                                                         | 2051 | 0.172863454 | 0.30787373 | Yes |
| 49 | TGFBR2 | TGFBR2 | transforming growth factor, beta receptor II (70/80kDa)                                                | 2138 | 0.169005066 | 0.3091902  | Yes |
| 50 | BTC    | BTC    | betacellulin                                                                                           | 2203 | 0.166291788 | 0.3114524  | Yes |
| 51 | PPARD  | PPARD  | peroxisome proliferative activated receptor, delta                                                     | 2457 | 0.155404568 | 0.30450797 | Yes |
| 52 | PRDM4  | PRDM4  | PR domain containing 4                                                                                 | 2463 | 0.155119419 | 0.309183   | Yes |
| 53 | IL18   | IL18   | interleukin 18 (interferon-gamma-inducing factor)                                                      | 2492 | 0.154062182 | 0.3127461  | Yes |
| 54 | CREG1  | CREG1  | cellular repressor of E1A-stimulated genes 1                                                           | 2546 | 0.151779652 | 0.31506476 | Yes |
| 55 | DEC1   | DEC1   | deleted in esophageal cancer 1                                                                         | 2561 | 0.151311368 | 0.31919724 | Yes |
| 56 | GAB1   | GAB1   | GRB2-associated binding protein 1                                                                      | 2573 | 0.15067476  | 0.32345027 | Yes |
| 57 | GAS8   | GAS8   | growth arrest-specific 8                                                                               | 2596 | 0.149782225 | 0.32715926 | Yes |
| 58 | ADRA1B | ADRA1B | adrenergic, alpha-1B-, receptor                                                                        | 2633 | 0.148645893 | 0.33017582 | Yes |
| 59 | IL6R   | IL6R   | interleukin 6 receptor                                                                                 | 2666 | 0.147008657 | 0.33332816 | Yes |
| 60 | HCLS1  | HCLS1  | hematopoietic cell-specific Lyn substrate 1                                                            | 2688 | 0.146225855 | 0.33697146 | Yes |
| 61 | CDKN1A | CDKN1A | cyclin-dependent kinase inhibitor 1A (p21, Cip1)                                                       | 2811 | 0.141815111 | 0.3357394  | Yes |
| 62 | CTF1   | CTF1   | cardiotrophin 1                                                                                        | 2817 | 0.141544431 | 0.33998477 | Yes |
| 63 | PIM2   | PIM2   | pim-2 oncogene                                                                                         | 2848 | 0.140406951 | 0.34302193 | Yes |
| 64 | VIP    | VIP    | vasoactive intestinal peptide                                                                          | 2860 | 0.140080556 | 0.34693965 | Yes |
| 65 | ING4   | ING4   | inhibitor of growth family, member 4                                                                   | 2929 | 0.137330174 | 0.34809765 | Yes |
| 66 | CD86   | CD86   | CD86 molecule                                                                                          | 3056 | 0.133393303 | 0.34641147 | Yes |

|     |         |         |                                                                                          |      |             |            |     |
|-----|---------|---------|------------------------------------------------------------------------------------------|------|-------------|------------|-----|
| 67  | GAS6    | GAS6    | growth arrest-specific 6                                                                 | 3162 | 0.130697861 | 0.3456247  | Yes |
| 68  | TIMP1   | TIMP1   | TIMP metalloproteinase inhibitor 1                                                       | 3180 | 0.130131975 | 0.34894618 | Yes |
| 69  | POLA1   | POLA1   | polymerase (DNA directed), alpha 1                                                       | 3268 | 0.127477482 | 0.34890145 | Yes |
| 70  | REG1A   | REG1A   | regenerating islet-derived 1 alpha (pancreatic stone protein, pancreatic thread protein) | 3337 | 0.1256928   | 0.34969112 | Yes |
| 71  | CDK5    | CDK5    | cyclin-dependent kinase 5                                                                | 3490 | 0.121766418 | 0.34641787 | Yes |
| 72  | RPS4X   | RPS4X   | ribosomal protein S4, X-linked                                                           | 3515 | 0.12092831  | 0.34911987 | Yes |
| 73  | CAPN1   | CAPN1   | calpain 1, (mu/l) large subunit                                                          | 3543 | 0.120177872 | 0.35165745 | Yes |
| 74  | COL4A3  | COL4A3  | collagen, type IV, alpha 3 (Goodpasture antigen)                                         | 3581 | 0.119040176 | 0.35369012 | Yes |
| 75  | IL1B    | IL1B    | interleukin 1, beta                                                                      | 3655 | 0.116936028 | 0.3539682  | Yes |
| 76  | SSTR3   | SSTR3   | somatostatin receptor 3                                                                  | 3741 | 0.114785895 | 0.35361558 | Yes |
| 77  | CD79A   | CD79A   | CD79a molecule, immunoglobulin-associated alpha                                          | 3773 | 0.114015445 | 0.35577056 | Yes |
| 78  | CXCL5   | CXCL5   | chemokine (C-X-C motif) ligand 5                                                         | 3780 | 0.11383687  | 0.35909212 | Yes |
| 79  | DNAJA2  | DNAJA2  | DnaJ (Hsp40) homolog, subfamily A, member 2                                              | 3960 | 0.109229386 | 0.35415608 | Yes |
| 80  | ADRA2A  | ADRA2A  | adrenergic, alpha-2A-, receptor                                                          | 4023 | 0.107724033 | 0.35465837 | Yes |
| 81  | TGFA    | TGFA    | transforming growth factor, alpha                                                        | 4089 | 0.105862737 | 0.3549611  | Yes |
| 82  | TUSC2   | TUSC2   | tumor suppressor candidate 2                                                             | 4114 | 0.105219945 | 0.35716593 | Yes |
| 83  | S100A11 | S100A11 | S100 calcium binding protein A11                                                         | 4259 | 0.101829134 | 0.35363677 | Yes |
| 84  | IL2RA   | IL2RA   | interleukin 2 receptor, alpha                                                            | 4290 | 0.100925691 | 0.35542437 | Yes |
| 85  | GML     | GML     | GPI anchored molecule like protein                                                       | 4384 | 0.09892308  | 0.35419458 | Yes |
| 86  | FOXO4   | null    | null                                                                                     | 4429 | 0.097892947 | 0.35522974 | Yes |
| 87  | CDK7    | CDK7    | cyclin-dependent kinase 7 (MO15 homolog, Xenopus laevis, cdk-activating kinase)          | 4440 | 0.09777192  | 0.3578553  | Yes |
| 88  | FLT3LG  | FLT3LG  | fms-related tyrosine kinase 3 ligand                                                     | 4462 | 0.097274549 | 0.35994932 | Yes |
| 89  | ACHE    | ACHE    | acetylcholinesterase (Yt blood group)                                                    | 4560 | 0.095479816 | 0.358423   | Yes |
| 90  | FGF5    | FGF5    | fibroblast growth factor 5                                                               | 4652 | 0.093706019 | 0.35712186 | Yes |
| 91  | SERTAD1 | SERTAD1 | SERTA domain containing 1                                                                | 4662 | 0.093544014 | 0.35966048 | Yes |
| 92  | IL21    | IL21    | interleukin 21                                                                           | 4704 | 0.09272325  | 0.36067268 | Yes |
| 93  | IFITM1  | IFITM1  | interferon induced transmembrane protein 1 (9-27)                                        | 4804 | 0.090650991 | 0.35889974 | Yes |
| 94  | MT3     | MT3     | metallothionein 3 (growth inhibitory factor (neurotrophic))                              | 4888 | 0.089096226 | 0.3578278  | Yes |
| 95  | NUDC    | NUDC    | nuclear distribution gene C homolog (A. nidulans)                                        | 4891 | 0.089074917 | 0.36055323 | Yes |
| 96  | CDC14A  | CDC14A  | CDC14 cell division cycle 14 homolog A (S. cerevisiae)                                   | 4914 | 0.088645652 | 0.36232728 | Yes |
| 97  | APC     | APC     | adenomatosis polyposis coli                                                              | 5048 | 0.086126611 | 0.35881692 | Yes |
| 98  | INSL4   | INSL4   | insulin-like 4 (placenta)                                                                | 5120 | 0.084426954 | 0.35815987 | Yes |
| 99  | MAGED1  | MAGED1  | melanoma antigen family D, 1                                                             | 5153 | 0.083798811 | 0.35931164 | Yes |
| 100 | GFI1B   | GFI1B   | growth factor independent 1B (potential regulator of CDKN1A, translocated in CML)        | 5156 | 0.08374583  | 0.36186838 | Yes |
| 101 | AGGF1   | AGGF1   | angiogenic factor with G patch and FHA domains 1                                         | 5204 | 0.082986191 | 0.36229107 | Yes |
| 102 | EBI3    | EBI3    | Epstein-Barr virus induced gene 3                                                        | 5398 | 0.07960777  | 0.35576105 | Yes |
| 103 | FES     | FES     | feline sarcoma oncogene                                                                  | 5466 | 0.078335702 | 0.35509878 | Yes |



|     |           |           |                                                                             |      |             |            |     |
|-----|-----------|-----------|-----------------------------------------------------------------------------|------|-------------|------------|-----|
| 104 | PTK2B     | PTK2B     | PTK2B protein tyrosine kinase 2 beta                                        | 5490 | 0.078015648 | 0.3564895  | Yes |
| 105 | GNRH1     | GNRH1     | gonadotropin-releasing hormone 1 (luteinizing-releasing hormone)            | 5578 | 0.076376759 | 0.35482746 | Yes |
| 106 | CD33      | CD33      | CD33 molecule                                                               | 5583 | 0.076310657 | 0.3570551  | Yes |
| 107 | FABP7     | FABP7     | fatty acid binding protein 7, brain                                         | 5656 | 0.075128973 | 0.3560569  | Yes |
| 108 | BMP10     | BMP10     | bone morphogenetic protein 10                                               | 5666 | 0.074994437 | 0.35800844 | Yes |
| 109 | NCK1      | NCK1      | NCK adaptor protein 1                                                       | 5711 | 0.074164227 | 0.3582926  | Yes |
| 110 | CD28      | CD28      | CD28 molecule                                                               | 5743 | 0.073815741 | 0.3591753  | Yes |
| 111 | FGFBP1    | FGFBP1    | fibroblast growth factor binding protein 1                                  | 5786 | 0.073134802 | 0.35952064 | Yes |
| 112 | IL12RB1   | IL12RB1   | interleukin 12 receptor, beta 1                                             | 5822 | 0.072503202 | 0.3601742  | Yes |
| 113 | GPX1      | GPX1      | glutathione peroxidase 1                                                    | 5849 | 0.072189413 | 0.36123988 | Yes |
| 114 | TNFRSF11A | TNFRSF11A | tumor necrosis factor receptor superfamily, member 11a, NFkB activator      | 5856 | 0.07208354  | 0.36323994 | Yes |
| 115 | RASGRP4   | RASGRP4   | RAS guanyl releasing protein 4                                              | 5944 | 0.070813656 | 0.36140183 | No  |
| 116 | NPM1      | NPM1      | nucleophosmin (nucleolar phosphoprotein B23, numatrin)                      | 6055 | 0.068857245 | 0.35842335 | No  |
| 117 | MXD4      | MXD4      | MAX dimerization protein 4                                                  | 6068 | 0.068619534 | 0.36003247 | No  |
| 118 | CCKBR     | CCKBR     | cholecystokinin B receptor                                                  | 6138 | 0.067341849 | 0.35892847 | No  |
| 119 | PROK2     | PROK2     | prokineticin 2                                                              | 6219 | 0.066174619 | 0.35727176 | No  |
| 120 | FOXP3     | FOXP3     | forkhead box P3                                                             | 6292 | 0.065065689 | 0.35595506 | No  |
| 121 | PLG       | PLG       | plasminogen                                                                 | 6317 | 0.064623311 | 0.35687503 | No  |
| 122 | POU1F1    | POU1F1    | POU domain, class 1, transcription factor 1 (Pit1, growth hormone factor 1) | 6344 | 0.064182088 | 0.35768723 | No  |
| 123 | IL3       | IL3       | interleukin 3 (colony-stimulating factor, multiple)                         | 6430 | 0.062913448 | 0.35569286 | No  |
| 124 | DUSP22    | DUSP22    | dual specificity phosphatase 22                                             | 6476 | 0.06238633  | 0.35555738 | No  |
| 125 | BCAR1     | BCAR1     | breast cancer anti-estrogen resistance 1                                    | 6536 | 0.061431218 | 0.3547352  | No  |
| 126 | VHL       | VHL       | von Hippel-Lindau tumor suppressor                                          | 6676 | 0.059123386 | 0.35008886 | No  |
| 127 | CDK5R1    | CDK5R1    | cyclin-dependent kinase 5, regulatory subunit 1 (p35)                       | 6684 | 0.059034295 | 0.35162905 | No  |
| 128 | MDM2      | MDM2      | Mdm2, transformed 3T3 cell double minute 2, p53 binding protein (mouse)     | 6769 | 0.057745967 | 0.34951803 | No  |
| 129 | IL11      | IL11      | interleukin 11                                                              | 6775 | 0.057650555 | 0.3511082  | No  |
| 130 | SSTR2     | SSTR2     | somatostatin receptor 2                                                     | 6826 | 0.056861244 | 0.35056338 | No  |
| 131 | UTP20     | UTP20     | UTP20, small subunit (SSU) processome component, homolog (yeast)            | 6838 | 0.056720529 | 0.3518428  | No  |
| 132 | LMO1      | LMO1      | LIM domain only 1 (rhombotin 1)                                             | 6943 | 0.055119812 | 0.34871086 | No  |
| 133 | FGF7      | FGF7      | fibroblast growth factor 7 (keratinocyte growth factor)                     | 6970 | 0.054781642 | 0.34922555 | No  |
| 134 | MYO16     | null      | null                                                                        | 6986 | 0.054480046 | 0.3502465  | No  |
| 135 | PEMT      | PEMT      | phosphatidylethanolamine N-methyltransferase                                | 7021 | 0.053992491 | 0.3503611  | No  |
| 136 | BAI1      | BAI1      | brain-specific angiogenesis inhibitor 1                                     | 7290 | 0.050045792 | 0.3393788  | No  |
| 137 | DLG5      | DLG5      | discs, large homolog 5 (Drosophila)                                         | 7414 | 0.048313707 | 0.3351406  | No  |
| 138 | CAPNS1    | CAPNS1    | calpain, small subunit 1                                                    | 7439 | 0.04786611  | 0.3355302  | No  |
| 139 | ZMYND11   | ZMYND11   | zinc finger, MYND domain containing 11                                      | 7455 | 0.047683381 | 0.33633602 | No  |
| 140 | ZEB1      | null      | null                                                                        | 7461 | 0.047621418 | 0.33760875 | No  |
| 141 | MAS1      | MAS1      | MAS1 oncogene                                                               | 7507 | 0.046950784 | 0.33698472 | No  |

|     |          |          |                                                                                                                |      |             |            |    |
|-----|----------|----------|----------------------------------------------------------------------------------------------------------------|------|-------------|------------|----|
| 142 | RBBP7    | RBBP7    | retinoblastoma binding protein 7                                                                               | 7513 | 0.046874199 | 0.33823383 | No |
| 143 | FGF6     | FGF6     | fibroblast growth factor 6                                                                                     | 7534 | 0.04657688  | 0.3387702  | No |
| 144 | STAMPB   | STAMPB   | STAM binding protein                                                                                           | 7538 | 0.046561815 | 0.3401032  | No |
| 145 | PDAP1    | PDAP1    | PDGFA associated protein 1                                                                                     | 7570 | 0.046173569 | 0.34011102 | No |
| 146 | OPRM1    | OPRM1    | opioid receptor, mu 1                                                                                          | 7732 | 0.043573722 | 0.33394098 | No |
| 147 | ADAMTS8  | ADAMTS8  | ADAM metalloproteinase with thrombospondin type 1 motif, 8                                                     | 7790 | 0.042793784 | 0.33262274 | No |
| 148 | ERBB2    | ERBB2    | v-erb-b2 erythroblastic leukemia viral oncogene homolog 2, neuro/glioblastoma derived oncogene homolog (avian) | 7967 | 0.040056281 | 0.32563803 | No |
| 149 | ATPIF1   | ATPIF1   | ATPase inhibitory factor 1                                                                                     | 7981 | 0.039835516 | 0.32628927 | No |
| 150 | CUL1     | CUL1     | cullin 1                                                                                                       | 8047 | 0.039010957 | 0.32447615 | No |
| 151 | KRT4     | KRT4     | keratin 4                                                                                                      | 8083 | 0.038538091 | 0.32405478 | No |
| 152 | ABI1     | ABI1     | abl-interactor 1                                                                                               | 8100 | 0.038236063 | 0.3245147  | No |
| 153 | SLC29A2  | SLC29A2  | solute carrier family 29 (nucleoside transporters), member 2                                                   | 8137 | 0.037737481 | 0.32402107 | No |
| 154 | CGREF1   | CGREF1   | cell growth regulator with EF-hand domain 1                                                                    | 8143 | 0.037700683 | 0.32497984 | No |
| 155 | CRTAM    | CRTAM    | cytotoxic and regulatory T cell molecule                                                                       | 8155 | 0.037584215 | 0.32565358 | No |
| 156 | ADRA1A   | ADRA1A   | adrenergic, alpha-1A-, receptor                                                                                | 8192 | 0.03728237  | 0.32514554 | No |
| 157 | DLEC1    | DLEC1    | deleted in lung and esophageal cancer 1                                                                        | 8241 | 0.036586333 | 0.32405284 | No |
| 158 | PCNA     | PCNA     | proliferating cell nuclear antigen                                                                             | 8285 | 0.035969004 | 0.323175   | No |
| 159 | IL5RA    | IL5RA    | interleukin 5 receptor, alpha                                                                                  | 8468 | 0.033700049 | 0.3157078  | No |
| 160 | NCK2     | NCK2     | NCK adaptor protein 2                                                                                          | 8554 | 0.032405566 | 0.31274787 | No |
| 161 | DKC1     | DKC1     | dyskeratosis congenita 1, dyskerin                                                                             | 8596 | 0.031789038 | 0.31183153 | No |
| 162 | CTNNBIP1 | CTNNBIP1 | catenin, beta interacting protein 1                                                                            | 8609 | 0.03166442  | 0.31227103 | No |
| 163 | AIMP1    | null     | null                                                                                                           | 8651 | 0.030933147 | 0.3113276  | No |
| 164 | CBFA2T3  | CBFA2T3  | core-binding factor, runt domain, alpha subunit 2; translocated to, 3                                          | 8777 | 0.029478479 | 0.3063995  | No |
| 165 | CTBP1    | CTBP1    | C-terminal binding protein 1                                                                                   | 8780 | 0.029432166 | 0.3072372  | No |
| 166 | KRT2     | KRT2     | keratin 2 (epidermal ichthyosis bullosa of Siemens)                                                            | 8794 | 0.029229943 | 0.30755278 | No |
| 167 | S1PR2    | null     | null                                                                                                           | 8815 | 0.028985383 | 0.30753237 | No |
| 168 | JAG2     | JAG2     | jagged 2                                                                                                       | 8831 | 0.028719028 | 0.30773798 | No |
| 169 | E4F1     | E4F1     | E4F transcription factor 1                                                                                     | 8865 | 0.02815721  | 0.30708182 | No |
| 170 | CD160    | CD160    | CD160 molecule                                                                                                 | 8893 | 0.027754797 | 0.30669424 | No |
| 171 | SRA1     | SRA1     | steroid receptor RNA activator 1                                                                               | 9071 | 0.025680745 | 0.2992077  | No |
| 172 | GCG      | GCG      | glucagon                                                                                                       | 9148 | 0.024757748 | 0.2964277  | No |
| 173 | MATK     | MATK     | megakaryocyte-associated tyrosine kinase                                                                       | 9166 | 0.024550863 | 0.2964076  | No |
| 174 | NAP1L1   | NAP1L1   | nucleosome assembly protein 1-like 1                                                                           | 9232 | 0.023739353 | 0.2941112  | No |
| 175 | CD24     | CD24     | CD24 molecule                                                                                                  | 9244 | 0.023602095 | 0.2943424  | No |
| 176 | IFRD2    | IFRD2    | interferon-related developmental regulator 2                                                                   | 9255 | 0.023445139 | 0.29461554 | No |
| 177 | EVI5     | EVI5     | ecotropic viral integration site 5                                                                             | 9279 | 0.023190401 | 0.29427105 | No |
| 178 | MPL      | MPL      | myeloproliferative leukemia virus oncogene                                                                     | 9301 | 0.022921909 | 0.29401186 | No |
| 179 | CSF3     | CSF3     | colony stimulating factor 3 (granulocyte)                                                                      | 9303 | 0.022906447 | 0.29468995 | No |
| 180 | CLEC11A  | CLEC11A  | C-type lectin domain family                                                                                    | 9385 | 0.02180038  | 0.29158193 | No |

|     |         |         |                                                                                                |       |             |            |    |
|-----|---------|---------|------------------------------------------------------------------------------------------------|-------|-------------|------------|----|
|     |         |         | 11, member A                                                                                   |       |             |            |    |
| 181 | MFN2    | MFN2    | mitofusin 2                                                                                    | 9426  | 0.021287832 | 0.29038012 | No |
| 182 | CDK4    | CDK4    | cyclin-dependent kinase 4                                                                      | 9441  | 0.021035461 | 0.29038942 | No |
| 183 | ENPP7   | ENPP7   | ectonucleotide pyrophosphatase/phosphodiesterase 7                                             | 9465  | 0.020708427 | 0.2899664  | No |
| 184 | EGR4    | EGR4    | early growth response 4                                                                        | 9498  | 0.02035578  | 0.2891102  | No |
| 185 | ERF     | ERF     | Ets2 repressor factor                                                                          | 9510  | 0.020234678 | 0.28923485 | No |
| 186 | KHDRBS1 | KHDRBS1 | KH domain containing, RNA binding, signal transduction associated 1                            | 9577  | 0.019383455 | 0.28675365 | No |
| 187 | IGFBP7  | IGFBP7  | insulin-like growth factor binding protein 7                                                   | 9583  | 0.019324681 | 0.28713083 | No |
| 188 | APPL1   | null    | null                                                                                           | 9584  | 0.019321905 | 0.28774235 | No |
| 189 | SSTR5   | SSTR5   | somatostatin receptor 5                                                                        | 9590  | 0.019260006 | 0.2881175  | No |
| 190 | IGFBP4  | IGFBP4  | insulin-like growth factor binding protein 4                                                   | 9605  | 0.019042728 | 0.28806373 | No |
| 191 | B4GALT7 | B4GALT7 | xylosylprotein beta 1,4-galactosyltransferase, polypeptide 7 (galactosyltransferase I)         | 9642  | 0.018687377 | 0.2869672  | No |
| 192 | RBBP4   | RBBP4   | retinoblastoma binding protein 4                                                               | 9771  | 0.017206419 | 0.28150997 | No |
| 193 | IL31RA  | IL31RA  | interleukin 31 receptor A                                                                      | 9800  | 0.016836526 | 0.28072995 | No |
| 194 | IL9     | IL9     | interleukin 9                                                                                  | 9809  | 0.016777726 | 0.28088585 | No |
| 195 | BTG4    | BTG4    | B-cell translocation gene 4                                                                    | 9886  | 0.015942845 | 0.27782688 | No |
| 196 | RUNX3   | RUNX3   | runt-related transcription factor 3                                                            | 9887  | 0.015923485 | 0.27833086 | No |
| 197 | TNFRSF8 | TNFRSF8 | tumor necrosis factor receptor superfamily, member 8                                           | 9939  | 0.015352215 | 0.2764254  | No |
| 198 | MAPRE1  | MAPRE1  | microtubule-associated protein, RP/EB family, member 1                                         | 9952  | 0.015192938 | 0.27634358 | No |
| 199 | RHOG    | RHOG    | ras homolog gene family, member G (rho G)                                                      | 9953  | 0.015168027 | 0.27682364 | No |
| 200 | PYY     | PYY     | peptide YY                                                                                     | 10046 | 0.01410914  | 0.27295643 | No |
| 201 | SFTPD   | SFTPD   | surfactant, pulmonary-associated protein D                                                     | 10091 | 0.013406688 | 0.27131763 | No |
| 202 | SESN1   | SESN1   | sestrin 1                                                                                      | 10140 | 0.012726153 | 0.26946974 | No |
| 203 | SSTR4   | SSTR4   | somatostatin receptor 4                                                                        | 10223 | 0.011786865 | 0.2659979  | No |
| 204 | TNFRSF9 | TNFRSF9 | tumor necrosis factor receptor superfamily, member 9                                           | 10239 | 0.011632931 | 0.26566273 | No |
| 205 | CDC27   | CDC27   | cell division cycle 27                                                                         | 10325 | 0.010466292 | 0.26200843 | No |
| 206 | ZNF259  | ZNF259  | zinc finger protein 259                                                                        | 10365 | 0.009949706 | 0.26049465 | No |
| 207 | OSMR    | OSMR    | oncostatin M receptor                                                                          | 10368 | 0.009936164 | 0.26071537 | No |
| 208 | GHRL    | GHRL    | ghrelin/obestatin preprohormone                                                                | 10385 | 0.009810757 | 0.26027563 | No |
| 209 | FGF4    | FGF4    | fibroblast growth factor 4 (heparin secretory transforming protein 1, Kaposi sarcoma oncogene) | 10438 | 0.009250442 | 0.2581302  | No |
| 210 | PPM1D   | PPM1D   | protein phosphatase 1D magnesium-dependent, delta isoform                                      | 10593 | 0.007586553 | 0.25114942 | No |
| 211 | LRP1    | LRP1    | low density lipoprotein-related protein 1 (alpha-2-macroglobulin receptor)                     | 10644 | 0.007028555 | 0.24902742 | No |
| 212 | SLAMF1  | SLAMF1  | signaling lymphocytic activation molecule family member 1                                      | 10653 | 0.006913853 | 0.24887112 | No |
| 213 | EIF2AK2 | EIF2AK2 | eukaryotic translation initiation factor 2-alpha kinase 2                                      | 10706 | 0.006356344 | 0.24663408 | No |
| 214 | IL12B   | IL12B   | interleukin 12B (natural killer cell stimulatory factor 2,                                     | 10807 | 0.005214456 | 0.24211022 | No |

|     |         |         |                                                                                                    |       |              |            |    |
|-----|---------|---------|----------------------------------------------------------------------------------------------------|-------|--------------|------------|----|
|     |         |         | cytotoxic lymphocyte maturation factor 2, p40)                                                     |       |              |            |    |
| 215 | IL27    | IL27    | interleukin 27                                                                                     | 10815 | 0.005176412  | 0.24194583 | No |
| 216 | IL2     | IL2     | interleukin 2                                                                                      | 10855 | 0.004608519  | 0.24026302 | No |
| 217 | SIRPG   | SIRPG   | signal-regulatory protein gamma                                                                    | 10930 | 0.003745039  | 0.23691177 | No |
| 218 | IL9R    | IL9R    | interleukin 9 receptor                                                                             | 11059 | 0.002120954  | 0.23097712 | No |
| 219 | TACSTD2 | TACSTD2 | tumor-associated calcium signal transducer 2                                                       | 11071 | 0.001951047  | 0.23052308 | No |
| 220 | SSR1    | SSR1    | signal sequence receptor, alpha (translocon-associated protein alpha)                              | 11074 | 0.001911267  | 0.2304898  | No |
| 221 | CD47    | CD47    | CD47 molecule                                                                                      | 11141 | 0.001174588  | 0.22743231 | No |
| 222 | BNC1    | BNC1    | basonuclin 1                                                                                       | 11197 | 3.90E-04     | 0.22486575 | No |
| 223 | NRD1    | NRD1    | nardilysin (N-arginine dibasic convertase)                                                         | 11286 | -4.85E-04    | 0.22075488 | No |
| 224 | IGF1R   | IGF1R   | insulin-like growth factor 1 receptor                                                              | 11357 | -0.001375641 | 0.21751618 | No |
| 225 | PIM1    | PIM1    | pim-1 oncogene                                                                                     | 11361 | -0.001455182 | 0.21742158 | No |
| 226 | CXCL1   | CXCL1   | chemokine (C-X-C motif) ligand 1 (melanoma growth stimulating activity, alpha)                     | 11391 | -0.001828295 | 0.21611966 | No |
| 227 | FLT4    | FLT4    | fms-related tyrosine kinase 4                                                                      | 11399 | -0.001980319 | 0.21585412 | No |
| 228 | IL15RA  | IL15RA  | interleukin 15 receptor, alpha                                                                     | 11460 | -0.002804625 | 0.21312955 | No |
| 229 | LGI1    | LGI1    | leucine-rich, glioma inactivated 1                                                                 | 11482 | -0.003088171 | 0.21224262 | No |
| 230 | EGFR    | EGFR    | epidermal growth factor receptor (erythroblastic leukemia viral (v-erb-b) oncogene homolog, avian) | 11514 | -0.003537639 | 0.21090102 | No |
| 231 | GLI1    | GLI1    | glioma-associated oncogene homolog 1 (zinc finger protein)                                         | 11559 | -0.004149484 | 0.20896925 | No |
| 232 | ADRA1D  | ADRA1D  | adrenergic, alpha-1D-, receptor                                                                    | 11576 | -0.004366441 | 0.20835721 | No |
| 233 | ACVRL1  | ACVRL1  | activin A receptor type II-like 1                                                                  | 11609 | -0.004870047 | 0.20701091 | No |
| 234 | CDC25B  | CDC25B  | cell division cycle 25B                                                                            | 11611 | -0.004885202 | 0.20711863 | No |
| 235 | UMOD    | UMOD    | uromodulin (uromucoid, Tamm-Horsfall glycoprotein)                                                 | 11798 | -0.007333958 | 0.19862941 | No |
| 236 | EPS15   | EPS15   | epidermal growth factor receptor pathway substrate 15                                              | 11808 | -0.007467886 | 0.19844377 | No |
| 237 | CNOT8   | CNOT8   | CCR4-NOT transcription complex, subunit 8                                                          | 11867 | -0.008171789 | 0.19598284 | No |
| 238 | TIPIN   | TIPIN   | TIMELESS interacting protein                                                                       | 11916 | -0.008841908 | 0.19401202 | No |
| 239 | TXN     | TXN     | thioredoxin                                                                                        | 11921 | -0.008901022 | 0.19410618 | No |
| 240 | RAF1    | RAF1    | v-raf-1 murine leukemia viral oncogene homolog 1                                                   | 11945 | -0.0090606   | 0.1933145  | No |
| 241 | IL29    | IL29    | interleukin 29 (interferon, lambda 1)                                                              | 11958 | -0.009283854 | 0.19304566 | No |
| 242 | NAMPT   | null    | null                                                                                               | 11967 | -0.009353611 | 0.19296658 | No |
| 243 | REG1B   | REG1B   | regenerating islet-derived 1 beta (pancreatic stone protein, pancreatic thread protein)            | 11985 | -0.009493417 | 0.19246994 | No |
| 244 | ERG     | ERG     | v-ets erythroblastosis virus E26 oncogene homolog (avian)                                          | 12062 | -0.01043979  | 0.18923679 | No |
| 245 | CSE1L   | CSE1L   | CSE1 chromosome segregation 1-like (yeast)                                                         | 12063 | -0.010440956 | 0.18956724 | No |
| 246 | ALOX12  | ALOX12  | arachidonate 12-lipoxygenase                                                                       | 12129 | -0.011076838 | 0.18687004 | No |
| 247 | ZFP36L2 | ZFP36L2 | zinc finger protein 36, C3H type-like 2                                                            | 12324 | -0.013471508 | 0.17819996 | No |
| 248 | SPDYA   | SPDYA   | speedy homolog A                                                                                   | 12352 | -0.013731953 | 0.17736857 | No |

|     |         |         | (Drosophila)                                                                                               |       |              |            |    |
|-----|---------|---------|------------------------------------------------------------------------------------------------------------|-------|--------------|------------|----|
| 249 | TBRG4   | TBRG4   | transforming growth factor beta regulator 4                                                                | 12432 | -0.014684207 | 0.1741291  | No |
| 250 | ICOSLG  | ICOSLG  | inducible T-cell co-stimulator ligand                                                                      | 12453 | -0.014981631 | 0.17366548 | No |
| 251 | CDC16   | CDC16   | CDC16 cell division cycle 16 homolog ( <i>S. cerevisiae</i> )                                              | 12455 | -0.01499039  | 0.17409302 | No |
| 252 | CDKN2D  | CDKN2D  | cyclin-dependent kinase inhibitor 2D (p19, inhibits CDK4)                                                  | 12563 | -0.016349485 | 0.16959336 | No |
| 253 | CUL2    | CUL2    | cullin 2                                                                                                   | 12700 | -0.018184055 | 0.16379198 | No |
| 254 | MARK4   | MARK4   | MAP/microtubule affinity-regulating kinase 4                                                               | 12704 | -0.018218143 | 0.16422792 | No |
| 255 | PRKRIR  | PRKRIR  | protein-kinase, interferon-inducible double stranded RNA dependent inhibitor, repressor of (P58 repressor) | 12722 | -0.018364217 | 0.16401203 | No |
| 256 | OSM     | OSM     | oncostatin M                                                                                               | 12729 | -0.018465109 | 0.1643151  | No |
| 257 | POU3F2  | POU3F2  | POU domain, class 3, transcription factor 2                                                                | 12777 | -0.019128788 | 0.16271675 | No |
| 258 | PRDX1   | PRDX1   | peroxiredoxin 1                                                                                            | 12807 | -0.019464379 | 0.16197301 | No |
| 259 | FTH1    | FTH1    | ferritin, heavy polypeptide 1                                                                              | 12808 | -0.019464577 | 0.16258906 | No |
| 260 | MST1R   | MST1R   | macrophage stimulating 1 receptor (c-met-related tyrosine kinase)                                          | 12846 | -0.019940272 | 0.16148527 | No |
| 261 | GPNCMB  | GPNCMB  | glycoprotein (transmembrane) nmb                                                                           | 12865 | -0.020262079 | 0.16128255 | No |
| 262 | TBRG1   | TBRG1   | transforming growth factor beta regulator 1                                                                | 12877 | -0.020431403 | 0.16141342 | No |
| 263 | ARTN    | ARTN    | artemin                                                                                                    | 12921 | -0.020900715 | 0.16005869 | No |
| 264 | DHPS    | DHPS    | deoxyhypusine synthase                                                                                     | 12922 | -0.020907035 | 0.1607204  | No |
| 265 | TSPO    | TSPO    | translocator protein (18kDa)                                                                               | 12995 | -0.021807577 | 0.1580346  | No |
| 266 | CD40LG  | CD40LG  | CD40 ligand (TNF superfamily, member 5, hyper-IgM syndrome)                                                | 13002 | -0.021888943 | 0.15844603 | No |
| 267 | ELF4    | ELF4    | E74-like factor 4 (ets domain transcription factor)                                                        | 13100 | -0.023208585 | 0.15463234 | No |
| 268 | MNT     | MNT     | MAX binding protein                                                                                        | 13125 | -0.02354574  | 0.15425223 | No |
| 269 | GLP2R   | GLP2R   | glucagon-like peptide 2 receptor                                                                           | 13146 | -0.02383741  | 0.15406889 | No |
| 270 | FLT3    | FLT3    | fms-related tyrosine kinase 3                                                                              | 13151 | -0.023950618 | 0.15463936 | No |
| 271 | LAMP3   | LAMP3   | lysosomal-associated membrane protein 3                                                                    | 13284 | -0.02554499  | 0.14925851 | No |
| 272 | SPHK1   | SPHK1   | sphingosine kinase 1                                                                                       | 13377 | -0.026647178 | 0.1457881  | No |
| 273 | IL4     | IL4     | interleukin 4                                                                                              | 13385 | -0.026708486 | 0.14630519 | No |
| 274 | HGS     | HGS     | hepatocyte growth factor-regulated tyrosine kinase substrate                                               | 13457 | -0.027732605 | 0.14385381 | No |
| 275 | PRG4    | PRG4    | proteoglycan 4                                                                                             | 13513 | -0.028605865 | 0.14218028 | No |
| 276 | MAP3K11 | MAP3K11 | mitogen-activated protein kinase kinase kinase 11                                                          | 13549 | -0.029045444 | 0.14145844 | No |
| 277 | CUL4A   | CUL4A   | cullin 4A                                                                                                  | 13612 | -0.029651131 | 0.13948977 | No |
| 278 | TRAF1   | TRAF1   | TRAF interacting protein                                                                                   | 13630 | -0.029986875 | 0.13964173 | No |
| 279 | RPS27   | RPS27   | ribosomal protein S27 (metalloproteinase 1)                                                                | 13638 | -0.0301228   | 0.14026688 | No |
| 280 | PA2G4   | PA2G4   | proliferation-associated 2G4, 38kDa                                                                        | 13647 | -0.030252162 | 0.14084925 | No |
| 281 | CHRNA10 | CHRNA10 | cholinergic receptor, nicotinic, alpha 10                                                                  | 13836 | -0.032537669 | 0.13306393 | No |
| 282 | S100B   | S100B   | S100 calcium binding protein B                                                                             | 13859 | -0.032822642 | 0.1330712  | No |
| 283 | CDK10   | CDK10   | cyclin-dependent kinase (CDC2-like) 10                                                                     | 13928 | -0.033611953 | 0.13094656 | No |
| 284 | TCIRG1  | TCIRG1  | T-cell, immune regulator 1, ATPase, H+ transporting, lysosomal V0 subunit A3                               | 13965 | -0.034129966 | 0.13033876 | No |

|     |         |         |                                                                                                                 |       |              |             |    |
|-----|---------|---------|-----------------------------------------------------------------------------------------------------------------|-------|--------------|-------------|----|
| 285 | HTR1A   | HTR1A   | 5-hydroxytryptamine (serotonin) receptor 1A                                                                     | 14065 | -0.035420097 | 0.12681778  | No |
| 286 | EIF5A   | EIF5A   | eukaryotic translation initiation factor 5A                                                                     | 14073 | -0.035506785 | 0.12761334  | No |
| 287 | EPHB4   | EPHB4   | EPH receptor B4                                                                                                 | 14084 | -0.035623845 | 0.12827192  | No |
| 288 | THPO    | THPO    | thrombopoietin (myeloproliferative leukemia virus oncogene ligand, megakaryocyte growth and development factor) | 14092 | -0.035756849 | 0.1290754   | No |
| 289 | CUL5    | CUL5    | cullin 5                                                                                                        | 14222 | -0.037620284 | 0.12421738  | No |
| 290 | TP53I11 | TP53I11 | tumor protein p53 inducible protein 11                                                                          | 14296 | -0.038501248 | 0.12201304  | No |
| 291 | CDK9    | CDK9    | cyclin-dependent kinase 9 (CDC2-related kinase)                                                                 | 14306 | -0.038669936 | 0.12281493  | No |
| 292 | RAPGEF3 | RAPGEF3 | Rap guanine nucleotide exchange factor (GEF) 3                                                                  | 14356 | -0.039359428 | 0.12176308  | No |
| 293 | PRTN3   | PRTN3   | proteinase 3 (serine proteinase, neutrophil, Wegener granulomatosis autoantigen)                                | 14411 | -0.040032703 | 0.1204981   | No |
| 294 | PRL     | PRL     | prolactin                                                                                                       | 14509 | -0.041352704 | 0.11725867  | No |
| 295 | CDK2    | CDK2    | cyclin-dependent kinase 2                                                                                       | 14536 | -0.04187157  | 0.11736477  | No |
| 296 | FGF18   | FGF18   | fibroblast growth factor 18                                                                                     | 14676 | -0.043856949 | 0.11223527  | No |
| 297 | LIF     | LIF     | leukemia inhibitory factor (cholinergic differentiation factor)                                                 | 14826 | -0.046171289 | 0.10671012  | No |
| 298 | CHRM4   | CHRM4   | cholinergic receptor, muscarinic 4                                                                              | 14871 | -0.046956711 | 0.10613317  | No |
| 299 | CUL3    | CUL3    | cullin 3                                                                                                        | 14895 | -0.047236741 | 0.10654975  | No |
| 300 | CDKN2B  | CDKN2B  | cyclin-dependent kinase inhibitor 2B (p15, inhibits CDK4)                                                       | 14950 | -0.047930207 | 0.10553472  | No |
| 301 | GNL3    | GNL3    | guanine nucleotide binding protein-like 3 (nucleolar)                                                           | 15282 | -0.05287857  | 0.09168807  | No |
| 302 | RARRES1 | RARRES1 | retinoic acid receptor responder (tazarotene induced) 1                                                         | 15330 | -0.053544387 | 0.091178946 | No |
| 303 | SFN     | SFN     | stratifin                                                                                                       | 15462 | -0.055465557 | 0.086791955 | No |
| 304 | DERL2   | DERL2   | Der1-like domain family, member 2                                                                               | 15631 | -0.05802938  | 0.080751225 | No |
| 305 | VIPR1   | VIPR1   | vasoactive intestinal peptide receptor 1                                                                        | 15638 | -0.058087915 | 0.08230835  | No |
| 306 | GPC4    | GPC4    | glypican 4                                                                                                      | 15707 | -0.059067633 | 0.08098937  | No |
| 307 | MNAT1   | MNAT1   | menage a trois homolog 1, cyclin H assembly factor ( <i>Xenopus laevis</i> )                                    | 15874 | -0.061676774 | 0.07515785  | No |
| 308 | NPY     | NPY     | neuropeptide Y                                                                                                  | 16310 | -0.069361366 | 0.05695643  | No |
| 309 | IL6     | IL6     | interleukin 6 (interferon, beta 2)                                                                              | 16656 | -0.07504721  | 0.043154962 | No |
| 310 | VTI1B   | VTI1B   | vesicle transport through interaction with t-SNAREs homolog 1B (yeast)                                          | 16739 | -0.07632897  | 0.04172585  | No |
| 311 | BAP1    | BAP1    | BRCA1 associated protein-1 (ubiquitin carboxy-terminal hydrolase)                                               | 16777 | -0.07719399  | 0.04243412  | No |
| 312 | ALOX15B | ALOX15B | arachidonate 15-lipoxygenase, type B                                                                            | 16778 | -0.077236906 | 0.044878636 | No |
| 313 | REG3A   | REG3A   | regenerating islet-derived 3 alpha                                                                              | 16860 | -0.07862132  | 0.04356896  | No |
| 314 | BNIP1   | BNIP1   | BCL2/adenovirus E1B 19kD interacting protein like                                                               | 16939 | -0.080603831 | 0.042462703 | No |
| 315 | LRP5    | LRP5    | low density lipoprotein receptor-related protein 5                                                              | 17412 | -0.09000086  | 0.023179622 | No |
| 316 | CHRM1   | CHRM1   | cholinergic receptor, muscarinic 1                                                                              | 17431 | -0.090610169 | 0.025203396 | No |
| 317 | TRIM27  | TRIM27  | tripartite motif-containing 27                                                                                  | 17525 | -0.093101576 | 0.023789352 | No |

|     |         |         |                                                                                    |       |              |              |    |
|-----|---------|---------|------------------------------------------------------------------------------------|-------|--------------|--------------|----|
| 318 | BIN1    | BIN1    | bridging integrator 1                                                              | 17576 | -0.094351873 | 0.024431102  | No |
| 319 | KRT16   | KRT16   | keratin 16 (focal non-epidermolytic palmoplantar keratoderma)                      | 17727 | -0.097456351 | 0.020482216  | No |
| 320 | ETS1    | ETS1    | v-ets erythroblastosis virus E26 oncogene homolog 1 (avian)                        | 17811 | -0.099561855 | 0.019741526  | No |
| 321 | CRIP1   | CRIP1   | cysteine-rich protein 1 (intestinal)                                               | 18118 | -0.106506787 | 0.008764412  | No |
| 322 | NAB2    | NAB2    | NGFI-A binding protein 2 (EGR1 binding protein 2)                                  | 18355 | -0.113671437 | 0.00129628   | No |
| 323 | ARHGEF2 | ARHGEF2 | rho/rac guanine nucleotide exchange factor (GEF) 2                                 | 18545 | -0.118463278 | -0.003816414 | No |
| 324 | EMP2    | EMP2    | epithelial membrane protein 2                                                      | 18708 | -0.123332866 | -0.007508986 | No |
| 325 | CGRRF1  | CGRRF1  | cell growth regulator with ring finger domain 1                                    | 18904 | -0.130409956 | -0.012524906 | No |
| 326 | WARS    | WARS    | tryptophanyl-tRNA synthetase                                                       | 19122 | -0.138682723 | -0.018310552 | No |
| 327 | DTYMK   | DTYMK   | deoxythymidylate kinase (thymidylate kinase)                                       | 19242 | -0.143337071 | -0.019353775 | No |
| 328 | PDGFA   | PDGFA   | platelet-derived growth factor alpha polypeptide                                   | 19276 | -0.14433825  | -0.016332865 | No |
| 329 | KLF4    | KLF4    | Kruppel-like factor 4 (gut)                                                        | 19825 | -0.168869585 | -0.036683343 | No |
| 330 | PRMT5   | PRMT5   | protein arginine methyltransferase 5                                               | 20307 | -0.198735148 | -0.05294703  | No |
| 331 | CDCA7   | CDCA7   | cell division cycle associated 7                                                   | 20339 | -0.200911999 | -0.048041806 | No |
| 332 | EREG    | EREG    | epiregulin                                                                         | 20576 | -0.219129354 | -0.05217224  | No |
| 333 | ISG20   | ISG20   | interferon stimulated exonuclease gene 20kDa                                       | 20933 | -0.262792706 | -0.06054742  | No |
| 334 | CHEK1   | CHEK1   | CHK1 checkpoint homolog (S. pombe)                                                 | 21201 | -0.319178194 | -0.06296491  | No |
| 335 | FOSL1   | FOSL1   | FOS-like antigen 1                                                                 | 21384 | -0.373894244 | -0.059665095 | No |
| 336 | CDC6    | CDC6    | CDC6 cell division cycle 6 homolog (S. cerevisiae)                                 | 21428 | -0.394535273 | -0.049194444 | No |
| 337 | TPX2    | TPX2    | TPX2, microtubule-associated, homolog (Xenopus laevis)                             | 21429 | -0.395684868 | -0.036671188 | No |
| 338 | CDC25C  | CDC25C  | cell division cycle 25C                                                            | 21458 | -0.413165182 | -0.024907574 | No |
| 339 | PLK1    | PLK1    | polo-like kinase 1 (Drosophila)                                                    | 21558 | -0.52869755  | -0.012816524 | No |
| 340 | CDKN3   | CDKN3   | cyclin-dependent kinase inhibitor 3 (CDK2-associated dual specificity phosphatase) | 21582 | -0.563470125 | 0.003938621  | No |

**Supplemental Table 9.** Gene set enrichment analysis of ACC patients' cohort for genes related to the negative regulation of cell apoptosis (dataset GSEA49278).

|    | PROBE   | GENE SYMBOL | GENE NAME                                                                     | RANK IN GENE LIST | RANK METRIC SCORE | RUNNING ES  | CORE ENRICHMENT |
|----|---------|-------------|-------------------------------------------------------------------------------|-------------------|-------------------|-------------|-----------------|
| 1  | NME5    | NME5        | non-metastatic cells 5, protein expressed in (nucleoside-diphosphate kinase)  | 4                 | 0.860342324       | 0.098880835 | Yes             |
| 2  | SCG2    | SCG2        | secretogranin II (chromogranin C)                                             | 88                | 0.528024495       | 0.15583326  | Yes             |
| 3  | SNCA    | SNCA        | synuclein, alpha (non A4 component of amyloid precursor)                      | 161               | 0.456243515       | 0.20503029  | Yes             |
| 4  | IL7     | IL7         | interleukin 7                                                                 | 425               | 0.340098083       | 0.23199776  | Yes             |
| 5  | FAS     | FAS         | Fas (TNF receptor superfamily, member 6)                                      | 523               | 0.317924172       | 0.26410854  | Yes             |
| 6  | ANXA1   | ANXA1       | annexin A1                                                                    | 690               | 0.283001095       | 0.2889988   | Yes             |
| 7  | ALB     | ALB         | albumin                                                                       | 1207              | 0.225458503       | 0.29103547  | Yes             |
| 8  | BCL2L1  | BCL2L1      | BCL2-like 1                                                                   | 1316              | 0.217199907       | 0.3110381   | Yes             |
| 9  | BIRC3   | BIRC3       | baculoviral IAP repeat-containing 3                                           | 1323              | 0.216733977       | 0.33571628  | Yes             |
| 10 | CD74    | CD74        | CD74 molecule, major histocompatibility complex, class II invariant chain     | 1578              | 0.199223205       | 0.34687963  | Yes             |
| 11 | RASA1   | RASA1       | RAS p21 protein activator (GTPase activating protein) 1                       | 1793              | 0.187307358       | 0.3585255   | Yes             |
| 12 | HSPB1   | HSPB1       | heat shock 27kDa protein 1                                                    | 2237              | 0.163989902       | 0.35686886  | Yes             |
| 13 | ANXA4   | ANXA4       | annexin A4                                                                    | 2559              | 0.151462734       | 0.35942626  | Yes             |
| 14 | KRT18   | KRT18       | keratin 18                                                                    | 3507              | 0.121187449       | 0.32947305  | Yes             |
| 15 | NUAK2   | NUAK2       | NUAK family, SNF1-like kinase, 2                                              | 3542              | 0.120194972       | 0.3417368   | Yes             |
| 16 | PIK3R2  | PIK3R2      | phosphoinositide-3-kinase, regulatory subunit 2 (p85 beta)                    | 3548              | 0.120098911       | 0.35533407  | Yes             |
| 17 | CLN3    | CLN3        | ceroid-lipofuscinosis, neuronal 3, juvenile (Batten, Spielmeyer-Vogt disease) | 3686              | 0.115952492       | 0.36233371  | Yes             |
| 18 | HBXIP   | HBXIP       | hepatitis B virus x interacting protein                                       | 3844              | 0.112197995       | 0.36797372  | Yes             |
| 19 | DFFA    | DFFA        | DNA fragmentation factor, 45kDa, alpha polypeptide                            | 3955              | 0.109345391       | 0.37546444  | Yes             |
| 20 | IER3    | IER3        | immediate early response 3                                                    | 3981              | 0.108642817       | 0.38681525  | Yes             |
| 21 | SOCS2   | SOCS2       | suppressor of cytokine signaling 2                                            | 4339              | 0.099894404       | 0.38176554  | Yes             |
| 22 | BCL2L10 | BCL2L10     | BCL2-like 10 (apoptosis facilitator)                                          | 4773              | 0.09131366        | 0.37220404  | Yes             |
| 23 | IL2RB   | IL2RB       | interleukin 2 receptor, beta                                                  | 5038              | 0.086299635       | 0.36990088  | Yes             |
| 24 | NAIP    | NAIP        | -                                                                             | 5248              | 0.082110353       | 0.3696654   | Yes             |
| 25 | HDAC3   | HDAC3       | histone deacetylase 3                                                         | 5260              | 0.081986189       | 0.3785959   | Yes             |
| 26 | BRAF    | BRAF        | v-raf murine sarcoma viral oncogene homolog B1                                | 5307              | 0.081282407       | 0.38582256  | Yes             |
| 27 | TRIAP1  | TRIAP1      | TP53 regulated inhibitor of apoptosis 1                                       | 5498              | 0.07790155        | 0.3859834   | Yes             |
| 28 | BCL2    | BCL2        | B-cell CLL/lymphoma 2                                                         | 5560              | 0.076706842       | 0.39198774  | Yes             |
| 29 | CD28    | CD28        | CD28 molecule                                                                 | 5743              | 0.073815741       | 0.392049    | Yes             |
| 30 | PRKCZ   | PRKCZ       | protein kinase C, zeta                                                        | 5796              | 0.073033877       | 0.39804772  | Yes             |
| 31 | NFKB1   | NFKB1       | nuclear factor of kappa light polypeptide gene enhancer in B-cells 1 (p105)   | 5810              | 0.072698802       | 0.40581605  | Yes             |
| 32 | GPX1    | GPX1        | glutathione peroxidase 1                                                      | 5849              | 0.072189413       | 0.4123666   | Yes             |
| 33 | NOL3    | NOL3        | nucleolar protein 3 (apoptosis repressor with CARD domain)                    | 6034              | 0.069300607       | 0.41181526  | Yes             |
| 34 | NPM1    | NPM1        | nucleophosmin (nucleolar phosphoprotein B23, numatrin)                        | 6055              | 0.068857245       | 0.4188167   | Yes             |



|    |         |         |                                                                                                                                         |       |              |            |     |
|----|---------|---------|-----------------------------------------------------------------------------------------------------------------------------------------|-------|--------------|------------|-----|
| 35 | CD27    | null    | null                                                                                                                                    | 6079  | 0.068466067  | 0.425634   | Yes |
| 36 | MCL1    | MCL1    | myeloid cell leukemia sequence 1 (BCL2-related)                                                                                         | 6080  | 0.068434715  | 0.4335141  | Yes |
| 37 | BCL3    | BCL3    | B-cell CLL/lymphoma 3                                                                                                                   | 6103  | 0.068020105  | 0.4403264  | Yes |
| 38 | TNF     | TNF     | tumor necrosis factor (TNF superfamily, member 2)                                                                                       | 6189  | 0.066427469  | 0.44403434 | Yes |
| 39 | PROK2   | PROK2   | prokineticin 2                                                                                                                          | 6219  | 0.066174619  | 0.4503096  | Yes |
| 40 | PPT1    | PPT1    | palmitoyl-protein thioesterase 1 (ceroid-lipofuscinosis, neuronal 1, infantile)                                                         | 6238  | 0.065888956  | 0.45706198 | Yes |
| 41 | CFLAR   | CFLAR   | CASP8 and FADD-like apoptosis regulator                                                                                                 | 6417  | 0.063088998  | 0.45607355 | Yes |
| 42 | IL3     | IL3     | interleukin 3 (colony-stimulating factor, multiple)                                                                                     | 6430  | 0.062913448  | 0.4627615  | Yes |
| 43 | GSTP1   | GSTP1   | glutathione S-transferase pi                                                                                                            | 6467  | 0.062425952  | 0.46828055 | Yes |
| 44 | BAX     | BAX     | BCL2-associated X protein                                                                                                               | 6888  | 0.055860892  | 0.4552395  | No  |
| 45 | ANXA5   | ANXA5   | annexin A5                                                                                                                              | 6917  | 0.055520959  | 0.4603344  | No  |
| 46 | PROC    | PROC    | protein C (inactivator of coagulation factors Va and VIIIa)                                                                             | 7219  | 0.05099934   | 0.45225096 | No  |
| 47 | TNFAIP8 | TNFAIP8 | tumor necrosis factor, alpha-induced protein 8                                                                                          | 7419  | 0.048167843  | 0.44857076 | No  |
| 48 | HSPA9   | null    | null                                                                                                                                    | 7553  | 0.046454042  | 0.44775328 | No  |
| 49 | BECN1   | BECN1   | beclin 1 (coiled-coil, myosin-like BCL2 interacting protein)                                                                            | 7566  | 0.046241455  | 0.45252147 | No  |
| 50 | BNIP1   | BNIP1   | BCL2/adenovirus E1B 19kDa interacting protein 1                                                                                         | 7887  | 0.041333474  | 0.44244415 | No  |
| 51 | ACVR1   | ACVR1   | activin A receptor, type I                                                                                                              | 7936  | 0.040597793  | 0.44489336 | No  |
| 52 | MPO     | MPO     | myeloperoxidase                                                                                                                         | 8020  | 0.039274715  | 0.44556743 | No  |
| 53 | HDAC1   | HDAC1   | histone deacetylase 1                                                                                                                   | 8406  | 0.034473911  | 0.43168652 | No  |
| 54 | BAG4    | BAG4    | BCL2-associated athanogene 4                                                                                                            | 8719  | 0.030154433  | 0.42069283 | No  |
| 55 | FAIM3   | FAIM3   | Fas apoptotic inhibitory molecule 3                                                                                                     | 8736  | 0.029968835  | 0.42340183 | No  |
| 56 | SH3GLB1 | SH3GLB1 | SH3-domain GRB2-like endophilin B1                                                                                                      | 9343  | 0.022310374  | 0.39787364 | No  |
| 57 | ERC1    | ERC1    | ELKS/RAB6-interacting/CAST family member 1                                                                                              | 9472  | 0.020599198  | 0.39431086 | No  |
| 58 | OPA1    | OPA1    | optic atrophy 1 (autosomal dominant)                                                                                                    | 9575  | 0.019427914  | 0.39181873 | No  |
| 59 | RTN4    | RTN4    | reticulon 4                                                                                                                             | 9869  | 0.01611501   | 0.38008937 | No  |
| 60 | GHRL    | GHRL    | ghrelin/obestatin preprohormone                                                                                                         | 10385 | 0.009810757  | 0.3573411  | No  |
| 61 | CCL2    | CCL2    | chemokine (C-C motif) ligand 2                                                                                                          | 10441 | 0.009224033  | 0.35585314 | No  |
| 62 | IL2     | IL2     | interleukin 2                                                                                                                           | 10855 | 0.004608519  | 0.33723506 | No  |
| 63 | RELA    | RELA    | v-rel reticuloendotheliosis viral oncogene homolog A, nuclear factor of kappa light polypeptide gene enhancer in B-cells 3, p65 (avian) | 11049 | 0.002243968  | 0.328545   | No  |
| 64 | PAX7    | PAX7    | paired box gene 7                                                                                                                       | 11070 | 0.00195976   | 0.32784337 | No  |
| 65 | CRYAA   | CRYAA   | crystallin, alpha A                                                                                                                     | 11206 | 2.70E-04     | 0.3216152  | No  |
| 66 | IGF1R   | IGF1R   | insulin-like growth factor 1 receptor                                                                                                   | 11357 | -0.001375641 | 0.31481883 | No  |
| 67 | PIM1    | PIM1    | pim-1 oncogene                                                                                                                          | 11361 | -0.001455182 | 0.3148473  | No  |
| 68 | IFI6    | IFI6    | interferon, alpha-inducible protein 6                                                                                                   | 11376 | -0.001573919 | 0.31437942 | No  |
| 69 | GSK3B   | GSK3B   | glycogen synthase kinase 3 beta                                                                                                         | 11412 | -0.002145146 | 0.31300366 | No  |
| 70 | HSP90B1 | HSP90B1 | heat shock protein 90kDa beta (Grp94), member 1                                                                                         | 11599 | -0.004746776 | 0.30492637 | No  |
| 71 | CLCF1   | CLCF1   | cardiotrophin-like cytokine factor 1                                                                                                    | 11719 | -0.006441419 | 0.30015063 | No  |
| 72 | API5    | API5    | apoptosis inhibitor 5                                                                                                                   | 11901 | -0.008608071 | 0.29274976 | No  |

|    |           |           |                                                                                                                  |       |              |             |    |
|----|-----------|-----------|------------------------------------------------------------------------------------------------------------------|-------|--------------|-------------|----|
| 73 | SEMA4D    | SEMA4D    | sema domain, immunoglobulin domain (Ig), transmembrane domain (TM) and short cytoplasmic domain, (semaphorin) 4D | 11910 | -0.008731369 | 0.29338425  | No |
| 74 | AKT1S1    | AKT1S1    | AKT1 substrate 1 (proline-rich)                                                                                  | 12059 | -0.010366861 | 0.28771594  | No |
| 75 | XIAP      | null      | null                                                                                                             | 12075 | -0.010562339 | 0.2882367   | No |
| 76 | ALOX12    | ALOX12    | arachidonate 12-lipoxygenase                                                                                     | 12129 | -0.011076838 | 0.28705484  | No |
| 77 | CIAPIN1   | CIAPIN1   | cytokine induced apoptosis inhibitor 1                                                                           | 12249 | -0.012691939 | 0.28299883  | No |
| 78 | CDKN2D    | CDKN2D    | cyclin-dependent kinase inhibitor 2D (p19, inhibits CDK4)                                                        | 12563 | -0.016349485 | 0.2703692   | No |
| 79 | CFL1      | CFL1      | cofilin 1 (non-muscle)                                                                                           | 12788 | -0.019214019 | 0.2621959   | No |
| 80 | CD40LG    | CD40LG    | CD40 ligand (TNF superfamily, member 5, hyper-IgM syndrome)                                                      | 13002 | -0.021888943 | 0.2548406   | No |
| 81 | BAG1      | BAG1      | BCL2-associated athanogene                                                                                       | 13268 | -0.025324056 | 0.24546988  | No |
| 82 | SPHK1     | SPHK1     | sphingosine kinase 1                                                                                             | 13377 | -0.026647178 | 0.24353082  | No |
| 83 | IL4       | IL4       | interleukin 4                                                                                                    | 13385 | -0.026708486 | 0.24628168  | No |
| 84 | BFAR      | BFAR      | bifunctional apoptosis regulator                                                                                 | 13386 | -0.026720846 | 0.24935852  | No |
| 85 | SOD1      | SOD1      | superoxide dismutase 1, soluble (amyotrophic lateral sclerosis 1 (adult))                                        | 13525 | -0.028723838 | 0.24626763  | No |
| 86 | TAX1BP1   | TAX1BP1   | Tax1 (human T-cell leukemia virus type I) binding protein 1                                                      | 13597 | -0.029516889 | 0.24637452  | No |
| 87 | PRDX2     | PRDX2     | peroxiredoxin 2                                                                                                  | 13773 | -0.031840499 | 0.241927    | No |
| 88 | TNFRSF10D | TNFRSF10D | tumor necrosis factor receptor superfamily, member 10d, decoy with truncated death domain                        | 14578 | -0.042564835 | 0.20955078  | No |
| 89 | TPT1      | TPT1      | tumor protein, translationally-controlled 1                                                                      | 14978 | -0.048434991 | 0.19662833  | No |
| 90 | BCL2A1    | BCL2A1    | BCL2-related protein A1                                                                                          | 15504 | -0.056140222 | 0.17875113  | No |
| 91 | AATF      | AATF      | apoptosis antagonizing transcription factor                                                                      | 16146 | -0.066335693 | 0.15666956  | No |
| 92 | BCL10     | BCL10     | B-cell CLL/lymphoma 10                                                                                           | 16205 | -0.067594439 | 0.16176371  | No |
| 93 | ARHGDI2   | ARHGDI2   | Rho GDP dissociation inhibitor (GDI) alpha                                                                       | 16304 | -0.069322556 | 0.16520227  | No |
| 94 | IL6       | IL6       | interleukin 6 (interferon, beta 2)                                                                               | 16656 | -0.07504721  | 0.15756966  | No |
| 95 | ASNS      | ASNS      | asparagine synthetase                                                                                            | 17027 | -0.082082644 | 0.14986624  | No |
| 96 | DAD1      | DAD1      | defender against cell death 1                                                                                    | 17472 | -0.091574728 | 0.13982478  | No |
| 97 | AVEN      | AVEN      | apoptosis, caspase activation inhibitor                                                                          | 18711 | -0.123373665 | 0.0966311   | No |
| 98 | TNFSF18   | TNFSF18   | tumor necrosis factor (ligand) superfamily, member 18                                                            | 19895 | -0.172455892 | 0.061639197 | No |
| 99 | SOCS3     | SOCS3     | suppressor of cytokine signaling 3                                                                               | 20004 | -0.177397564 | 0.07705867  | No |

**Supplemental Table 10.** Drug metabolism-related genes with significantly ( $P \leq 0.05$ , absolute value of log ratio  $> 0.1$ ) changed expression in tumors from ACC patients (dataset GSE10927) with high *MET* expression relative to those with low *MET* expression.

| PROBE    | GENE SYMBOL | GENE NAME                                                                  | FOLD CHANGE (LOG RATIO) | P-VALUE* |
|----------|-------------|----------------------------------------------------------------------------|-------------------------|----------|
| 16657473 | OR4F29      | olfactory receptor, family 4, subfamily F, member 29                       | 0.2265                  | 0.0088   |
| 16657652 | MIR200A     | microRNA 200a                                                              | 0.1882                  | 0.0242   |
| 16658125 |             |                                                                            | 0.1586                  | 0.049    |
| 16658184 | TPRG1L      | tumor protein p63 regulated 1-like                                         | 0.3537                  | 0.0397   |
| 16658379 | LINC00337   | long intergenic non-protein coding RNA 337                                 | 0.2218                  | 0.0231   |
| 16658639 |             |                                                                            | 0.2769                  | 0.0071   |
| 16658945 |             |                                                                            | 0.4781                  | 0.0215   |
| 16658991 | PTCHD2      | patched domain containing 2                                                | 0.1928                  | 0.0428   |
| 16659021 | FBXO44      | F-box protein 44                                                           | 0.2698                  | 0.0014   |
| 16659054 | AGTRAP      | angiotensin II receptor-associated protein                                 | 0.4336                  | 0.0114   |
| 16659413 | PRAMEF15    | PRAME family member 15                                                     | 0.1636                  | 0.027    |
| 16659434 | PRAMEF15    | PRAME family member 15                                                     | 0.1636                  | 0.027    |
| 16659459 | PDPN        | podoplanin                                                                 | 0.2767                  | 0.0337   |
| 16659537 | TMEM51      | transmembrane protein 51                                                   | 0.4232                  | 0.0136   |
| 16659825 | CLCNKB      | chloride channel, voltage-sensitive Kb                                     | 0.8358                  | 0.019    |
| 16659856 |             |                                                                            | 0.2083                  | 0.0406   |
| 16660103 | ARHGEF10L   | Rho guanine nucleotide exchange factor (GEF) 10-like                       | 0.2473                  | 0.0169   |
| 16660156 | IGSF21      | immunoglobulin superfamily, member 21                                      | 0.385                   | 0.0206   |
| 16660313 | UBXN10      | UBX domain protein 10                                                      | 0.5995                  | 0.018    |
| 16660317 |             |                                                                            | 0.1481                  | 0.0118   |
| 16660356 | FAM43B      | family with sequence similarity 43, member B                               | 0.3229                  | 0.0179   |
| 16660367 | PINK1       | PTEN induced putative kinase 1                                             | 0.5941                  | 0.002    |
| 16660481 |             |                                                                            | 0.1877                  | 0.0414   |
| 16660785 | NIPAL3      | NIPA-like domain containing 3                                              | 0.3284                  | 0.0033   |
| 16660810 | RCAN3       | RCAN family member 3                                                       | 0.7087                  | 0.006    |
| 16660919 | TMEM57      | transmembrane protein 57                                                   | 0.4378                  | 0.0023   |
| 16661048 |             |                                                                            | 0.626                   | 0.0004   |
| 16661323 | NUDC        | nuclear distribution C homolog (A. nidulans)                               | 0.274                   | 0.0194   |
| 16661351 | WDTC1       | WD and tetratricopeptide repeats 1                                         | 0.3033                  | 0.0362   |
| 16661435 |             |                                                                            | 0.7055                  | 0.0014   |
| 16661687 | EPB41       | erythrocyte membrane protein band 4.1 (elliptocytosis 1, RH-linked)        | 0.6281                  | 0        |
| 16661730 | PTPRU       | protein tyrosine phosphatase, receptor type, U                             | 0.4675                  | 0.0019   |
| 16661832 | SERINC2     | serine incorporator 2                                                      | 0.9853                  | 0.0003   |
| 16661995 | CCDC28B     | coiled-coil domain containing 28B                                          | 0.2666                  | 0.0306   |
| 16662052 | LCK         | lymphocyte-specific protein tyrosine kinase                                | 0.1549                  | 0.0264   |
| 16662209 | ADC         | arginine decarboxylase                                                     | 0.1859                  | 0.0369   |
| 16662282 | LOC402779   | uncharacterized LOC402779                                                  | 0.2725                  | 0.0002   |
| 16662537 | MAP7D1      | MAP7 domain containing 1                                                   | 0.2756                  | 0.0024   |
| 16662662 |             |                                                                            | 0.3464                  | 0.0071   |
| 16663051 | ZNF643      | zinc finger protein 643                                                    | 0.3183                  | 0.0455   |
| 16663064 | ZNF642      | zinc finger protein 642                                                    | 0.3385                  | 0.029    |
| 16663199 | FOXO6       | forkhead box O6                                                            | 0.4525                  | 0.0053   |
| 16663284 | CCDC30      | coiled-coil domain containing 30                                           | 0.3181                  | 0.0152   |
| 16663398 | FAM183A     | family with sequence similarity 183, member A                              | 0.2093                  | 0.0137   |
| 16663413 | WDR65       | WD repeat domain 65                                                        | 0.1693                  | 0.0067   |
| 16664048 | UROD        | uroporphyrinogen decarboxylase                                             | 0.2879                  | 0.0045   |
| 16664388 | CYP4X1      | cytochrome P450, family 4, subfamily X, polypeptide 1                      | 0.1772                  | 0.0459   |
| 16664406 | CYP4Z1      | cytochrome P450, family 4, subfamily Z, polypeptide 1                      | 0.1672                  | 0.0383   |
| 16664516 |             |                                                                            | 0.1896                  | 0.0017   |
| 16664533 | ELAVL4      | ELAV (embryonic lethal, abnormal vision, Drosophila)-like 4 (Hu antigen D) | 0.1513                  | 0.0247   |
| 16664849 |             |                                                                            | 0.1178                  | 0.0497   |
| 16664978 | ACOT11      | acyl-CoA thioesterase 11                                                   | 0.8091                  | 0.0016   |

|          |              |                                                                      |        |        |
|----------|--------------|----------------------------------------------------------------------|--------|--------|
| 16665139 | MIR4422      | microRNA 4422                                                        | 0.2978 | 0.0251 |
| 16665182 | PRKAA2       | protein kinase, AMP-activated, alpha 2 catalytic subunit             | 0.9582 | 0.0067 |
| 16665302 | HOOK1        | hook homolog 1 (Drosophila)                                          | 1.0627 | 0.0014 |
| 16665343 |              |                                                                      | 0.2581 | 0.0051 |
| 16665475 | ATG4C        | autophagy related 4C, cysteine peptidase                             | 0.2916 | 0.0329 |
| 16665497 |              |                                                                      | 0.1681 | 0.014  |
| 16665501 |              |                                                                      | 0.1443 | 0.0446 |
| 16665536 | EFCAB7       | EF-hand calcium binding domain 7                                     | 0.3775 | 0.0029 |
| 16665835 | TCTEX1D1     | Tctex1 domain containing 1                                           | 0.1467 | 0.0325 |
| 16666102 |              |                                                                      | 0.2701 | 0.026  |
| 16666109 |              |                                                                      | 0.1935 | 0.0071 |
| 16666112 |              |                                                                      | 0.3704 | 0.0036 |
| 16666143 | FPGT-TNNI3K  | FPGT-TNNI3K readthrough                                              | 0.2618 | 0.0031 |
| 16666196 |              |                                                                      | 0.1286 | 0.0463 |
| 16666224 | LHX8         | LIM homeobox 8                                                       | 0.1523 | 0.0237 |
| 16666323 |              |                                                                      | 0.2155 | 0.0081 |
| 16666485 | IFI44L       | interferon-induced protein 44-like                                   | 0.7086 | 0.0092 |
| 16666610 |              |                                                                      | 0.3716 | 0.014  |
| 16666694 | WDR63        | WD repeat domain 63                                                  | 0.8667 | 0.048  |
| 16666977 |              |                                                                      | 0.5652 | 0.0162 |
| 16666982 | LRRC8C       | leucine rich repeat containing 8 family, member C                    | 0.2858 | 0.0447 |
| 16667060 | BRDT         | bromodomain, testis-specific                                         | 0.1156 | 0.0307 |
| 16667094 | EPHX4        | epoxide hydrolase 4                                                  | 0.6482 | 0.0248 |
| 16667256 |              |                                                                      | 0.2454 | 0.0012 |
| 16667258 | FBNP1L       | formin binding protein 1-like                                        | 0.4844 | 0.0082 |
| 16667346 | SLC44A3      | solute carrier family 44, member 3                                   | 0.5234 | 0.0415 |
| 16667496 |              |                                                                      | 0.2068 | 0.0401 |
| 16667498 | SNX7         | sorting nexin 7                                                      | 0.3984 | 0.0048 |
| 16667512 | LOC100129620 | uncharacterized LOC100129620                                         | 0.17   | 0.0155 |
| 16667530 | PALMD        | palmdelphin                                                          | 0.5364 | 0.0333 |
| 16667694 | GPR88        | G protein-coupled receptor 88                                        | 0.2609 | 0.0013 |
| 16667770 |              |                                                                      | 0.147  | 0.0036 |
| 16667799 |              |                                                                      | 0.1421 | 0.045  |
| 16667801 | RNPC3        | RNA-binding region (RNP1, RRM) containing 3                          | 0.637  | 0.0027 |
| 16667830 | AMY2B        | amylase, alpha 2B (pancreatic)                                       | 0.4963 | 0.002  |
| 16667850 | AMY2A        | amylase, alpha 2A (pancreatic)                                       | 0.4189 | 0.0007 |
| 16667925 | NTNG1        | netrin G1                                                            | 0.1841 | 0.0426 |
| 16667960 |              |                                                                      | 0.1644 | 0.0302 |
| 16668047 | STXBP3       | syntaxin binding protein 3                                           | 0.2103 | 0.0368 |
| 16668420 | CSF1         | colony stimulating factor 1 (macrophage)                             | 0.4268 | 0.0051 |
| 16668513 | UBL4B        | ubiquitin-like 4B                                                    | 0.2422 | 0.0018 |
| 16668517 | SLC6A17      | solute carrier family 6, member 17                                   | 1.2918 | 0.0001 |
| 16668548 |              |                                                                      | 0.1435 | 0.0221 |
| 16668677 | C1orf88      | chromosome 1 open reading frame 88                                   | 1.1243 | 0      |
| 16668712 | RAP1A        | RAP1A, member of RAS oncogene family                                 | 0.2098 | 0.0347 |
| 16668874 |              |                                                                      | 0.2748 | 0.0055 |
| 16668919 | MAGI3        | membrane associated guanylate kinase, WW and PDZ domain containing 3 | 0.2537 | 0.0265 |
| 16668997 | OLFML3       | olfactomedin-like 3                                                  | 0.4136 | 0.0051 |
| 16669161 | MIR320B1     | microRNA 320b-1                                                      | 0.3699 | 0.0003 |
| 16669169 | CD2          | CD2 molecule                                                         | 0.5162 | 0.0011 |
| 16669278 | FAM46C       | family with sequence similarity 46, member C                         | 0.6948 | 0.0084 |
| 16669687 |              |                                                                      | 0.3087 | 0.0252 |
| 16669796 | TXNIP        | thioredoxin interacting protein                                      | 0.5635 | 0.0175 |
| 16650005 |              |                                                                      | 0.7393 | 0.0104 |
| 16650187 |              |                                                                      | 0.3949 | 0.0022 |
| 16650227 |              |                                                                      | 0.3391 | 0.0206 |
| 16650317 |              |                                                                      | 0.2067 | 0.0181 |
| 16650485 |              |                                                                      | 0.3291 | 0.0142 |
| 16650495 |              |                                                                      | 0.3127 | 0.0028 |
| 16650497 |              |                                                                      | 0.6743 | 0.0242 |

|          |  |  |        |        |
|----------|--|--|--------|--------|
| 16650679 |  |  | 0.3747 | 0.0156 |
| 16650755 |  |  | 0.2029 | 0.0285 |
| 16650801 |  |  | 0.2901 | 0.0313 |
| 16650967 |  |  | 0.3271 | 0.0112 |
| 16650969 |  |  | 0.4108 | 0.0482 |
| 16650989 |  |  | 0.4085 | 0.0058 |
| 16651015 |  |  | 0.4197 | 0.022  |
| 16651069 |  |  | 0.1736 | 0.0393 |
| 16651097 |  |  | 0.2769 | 0.0087 |
| 16651141 |  |  | 0.2628 | 0.0323 |
| 16651187 |  |  | 0.5483 | 0.0035 |
| 16651317 |  |  | 0.2513 | 0.0039 |
| 16651401 |  |  | 0.5022 | 0.0037 |
| 16651453 |  |  | 0.4516 | 0.0374 |
| 16651487 |  |  | 0.448  | 0.0291 |
| 16651539 |  |  | 0.3517 | 0.0418 |
| 16651573 |  |  | 0.2182 | 0.0337 |
| 16651711 |  |  | 0.3232 | 0.0052 |
| 16651745 |  |  | 0.3175 | 0.0059 |
| 16651789 |  |  | 0.2551 | 0.0362 |
| 16651887 |  |  | 0.4966 | 0.021  |
| 16651903 |  |  | 0.2959 | 0.0277 |
| 16651915 |  |  | 0.341  | 0.0443 |
| 16651935 |  |  | 0.5834 | 0.0044 |
| 16651985 |  |  | 0.3538 | 0.0072 |
| 16652011 |  |  | 0.8625 | 0.0011 |
| 16652059 |  |  | 0.2206 | 0.0353 |
| 16652069 |  |  | 0.3535 | 0.0082 |
| 16652251 |  |  | 0.2817 | 0.0474 |
| 16652277 |  |  | 0.4681 | 0.0331 |
| 16652339 |  |  | 0.2327 | 0.0355 |
| 16652363 |  |  | 0.2685 | 0.0406 |
| 16652367 |  |  | 0.2035 | 0.0337 |
| 16652411 |  |  | 0.2903 | 0.0085 |
| 16652555 |  |  | 0.2571 | 0.011  |
| 16652579 |  |  | 0.341  | 0.0443 |
| 16652599 |  |  | 0.5834 | 0.0044 |
| 16652649 |  |  | 0.3538 | 0.0072 |
| 16652675 |  |  | 0.8625 | 0.0011 |
| 16652723 |  |  | 0.2206 | 0.0353 |
| 16652733 |  |  | 0.3535 | 0.0082 |
| 16652755 |  |  | 0.4762 | 0.0354 |
| 16652773 |  |  | 0.4156 | 0.0303 |
| 16652949 |  |  | 0.4296 | 0.0037 |
| 16652961 |  |  | 0.4703 | 0.0008 |
| 16653019 |  |  | 0.2791 | 0.011  |
| 16653171 |  |  | 0.2899 | 0.0053 |
| 16653201 |  |  | 0.4275 | 0.0379 |
| 16653269 |  |  | 0.1673 | 0.048  |
| 16653373 |  |  | 0.2252 | 0.0464 |
| 16653379 |  |  | 0.1842 | 0.0499 |
| 16653475 |  |  | 0.2252 | 0.0464 |
| 16653481 |  |  | 0.1842 | 0.0499 |
| 16653573 |  |  | 0.2732 | 0.0207 |
| 16653637 |  |  | 0.3966 | 0.049  |
| 16653641 |  |  | 0.3577 | 0.0298 |
| 16653959 |  |  | 0.2712 | 0.0442 |
| 16653973 |  |  | 0.2844 | 0.0322 |
| 16654001 |  |  | 0.5404 | 0.018  |
| 16654021 |  |  | 0.6917 | 0.0118 |
| 16654027 |  |  | 0.3171 | 0.024  |

|          |        |                                                                                |        |        |
|----------|--------|--------------------------------------------------------------------------------|--------|--------|
| 16654029 |        |                                                                                | 0.397  | 0.0361 |
| 16654135 |        |                                                                                | 0.4531 | 0.0114 |
| 16654191 |        |                                                                                | 0.3186 | 0.046  |
| 16654245 |        |                                                                                | 0.321  | 0.022  |
| 16654297 |        |                                                                                | 0.4933 | 0.0029 |
| 16654413 |        |                                                                                | 0.3069 | 0.0079 |
| 16654425 |        |                                                                                | 0.376  | 0.0109 |
| 16654433 |        |                                                                                | 0.276  | 0.0293 |
| 16654551 |        |                                                                                | 0.1712 | 0.0472 |
| 16654901 |        |                                                                                | 0.5115 | 0.008  |
| 16654937 |        |                                                                                | 0.35   | 0.0169 |
| 16654955 |        |                                                                                | 0.4965 | 0.0115 |
| 16654963 |        |                                                                                | 0.4158 | 0.0016 |
| 16654967 |        |                                                                                | 0.3628 | 0.0307 |
| 16655013 |        |                                                                                | 0.3664 | 0.0073 |
| 16655177 |        |                                                                                | 0.3003 | 0.0033 |
| 16655229 |        |                                                                                | 0.238  | 0.0017 |
| 16655241 |        |                                                                                | 0.3283 | 0.0403 |
| 16655295 |        |                                                                                | 0.2544 | 0.0074 |
| 16655395 |        |                                                                                | 0.328  | 0.0388 |
| 16655617 |        |                                                                                | 0.231  | 0.037  |
| 16655793 |        |                                                                                | 0.3496 | 0.0395 |
| 16655899 |        |                                                                                | 0.8463 | 0.0186 |
| 16655977 |        |                                                                                | 0.5069 | 0.0164 |
| 16656051 |        |                                                                                | 0.4687 | 0.0172 |
| 16656079 |        |                                                                                | 0.4713 | 0.0031 |
| 16656141 |        |                                                                                | 0.3052 | 0.029  |
| 16656145 |        |                                                                                | 0.3056 | 0.0412 |
| 16656171 |        |                                                                                | 0.1695 | 0.046  |
| 16656173 |        |                                                                                | 0.4528 | 0.0384 |
| 16656217 |        |                                                                                | 0.4022 | 0.0234 |
| 16656427 |        |                                                                                | 0.33   | 0.0455 |
| 16656557 |        |                                                                                | 0.7426 | 0.0022 |
| 16656757 |        |                                                                                | 0.3403 | 0.0226 |
| 16656773 |        |                                                                                | 0.2656 | 0.0157 |
| 16656777 |        |                                                                                | 0.4921 | 0.0095 |
| 16656793 |        |                                                                                | 0.3491 | 0.0102 |
| 16656809 |        |                                                                                | 0.3946 | 0.0142 |
| 16656813 |        |                                                                                | 0.4078 | 0.013  |
| 16656815 |        |                                                                                | 0.2829 | 0.0299 |
| 16656853 |        |                                                                                | 0.3841 | 0.0378 |
| 16656875 |        |                                                                                | 0.5041 | 0.0267 |
| 16656969 |        |                                                                                | 0.3248 | 0.0378 |
| 16657191 |        |                                                                                | 0.3435 | 0.0349 |
| 16657203 |        |                                                                                | 0.5116 | 0.0064 |
| 16657255 |        |                                                                                | 0.6848 | 0.0402 |
| 16657331 |        |                                                                                | 0.2534 | 0.0181 |
| 16657343 |        |                                                                                | 0.3775 | 0.0116 |
| 16657369 |        |                                                                                | 0.312  | 0.0115 |
| 16657373 |        |                                                                                | 0.2221 | 0.0324 |
| 16657395 |        |                                                                                | 0.3938 | 0.0232 |
| 16657421 |        |                                                                                | 0.4618 | 0.0096 |
|          |        |                                                                                |        |        |
| 16670164 |        |                                                                                | 0.2558 | 0.021  |
| 16670178 |        |                                                                                | 0.6233 | 0.0243 |
| 16670291 |        |                                                                                | 0.286  | 0.0031 |
| 16670317 | FCGR1C | Fc fragment of IgG, high affinity I <sub>c</sub> , receptor (CD64), pseudogene | 0.3831 | 0.0157 |
| 16670673 |        |                                                                                | 0.389  | 0.0101 |
| 16670681 | ANXA9  | annexin A9                                                                     | 0.3089 | 0.0248 |
| 16670866 | CGN    | cingulin                                                                       | 0.2991 | 0.0096 |

|          |              |                                                                        |        |        |
|----------|--------------|------------------------------------------------------------------------|--------|--------|
| 16670943 | RIIAD1       | regulatory subunit of type II PKA R-subunit (RIIa) domain containing 1 | 0.3536 | 0.0003 |
| 16671013 |              |                                                                        | 0.2665 | 0.0294 |
| 16671023 | CRCT1        | cysteine-rich C-terminal 1                                             | 0.1573 | 0.0371 |
| 16671100 | SPRR4        | small proline-rich protein 4                                           | 0.2224 | 0.0142 |
| 16671104 | SPRR1A       | small proline-rich protein 1A                                          | 1.6531 | 0.0451 |
| 16671115 | SPRR1B       | small proline-rich protein 1B                                          | 0.6892 | 0.0169 |
| 16671137 |              |                                                                        | 0.1245 | 0.0466 |
| 16672298 | KIRREL-IT1   | KIRREL intronic transcript 1 (non-protein coding)                      | 0.2522 | 0.014  |
| 16672323 | CD1C         | CD1c molecule                                                          | 0.2281 | 0.0276 |
| 16672333 | CD1E         | CD1e molecule                                                          | 0.259  | 0.0222 |
| 16672373 | PYHIN1       | pyrin and HIN domain family, member 1                                  | 0.2716 | 0.0108 |
| 16672390 | IFI16        | interferon, gamma-inducible protein 16                                 | 0.4303 | 0.0289 |
| 16672494 |              |                                                                        | 0.1493 | 0.0484 |
| 16672654 | SLAMF7       | SLAM family member 7                                                   | 0.354  | 0.0064 |
| 16672669 | LY9          | lymphocyte antigen 9                                                   | 0.1678 | 0.0335 |
| 16672710 | KLHDC9       | kelch domain containing 9                                              | 0.3998 | 0.0125 |
| 16672869 |              |                                                                        | 0.3283 | 0.0049 |
| 16672893 | FCGR2A       | Fc fragment of IgG, low affinity IIa, receptor (CD32)                  | 0.3437 | 0.0217 |
| 16672920 | FCGR2B       | Fc fragment of IgG, low affinity IIb, receptor (CD32)                  | 0.3583 | 0.0273 |
| 16673032 | RN5S61       | RNA, 5S ribosomal 61                                                   | 0.2553 | 0.0021 |
| 16673034 | MIR556       | microRNA 556                                                           | 0.1534 | 0.0054 |
| 16673075 | DDR2         | discoidin domain receptor tyrosine kinase 2                            | 0.6691 | 0.0092 |
| 16673146 |              |                                                                        | 0.3799 | 0.0074 |
| 16673182 |              |                                                                        | 0.146  | 0.0159 |
| 16673246 |              |                                                                        | 0.2975 | 0.0027 |
| 16673345 |              |                                                                        | 0.2172 | 0.0045 |
| 16673507 | XCL1         | chemokine (C motif) ligand 1                                           | 0.3266 | 0.0012 |
| 16673598 |              |                                                                        | 0.304  | 0.0337 |
| 16673748 | FMO4         | flavin containing monooxygenase 4                                      | 0.7721 | 0.0005 |
| 16673765 |              |                                                                        | 0.1153 | 0.0274 |
| 16673883 | C1orf105     | chromosome 1 open reading frame 105                                    | 0.1826 | 0.0406 |
| 16673928 | FASLG        | Fas ligand (TNF superfamily, member 6)                                 | 0.2094 | 0.0092 |
| 16674020 | RN5S67       | RNA, 5S ribosomal 67                                                   | 0.3919 | 0.0036 |
| 16674130 | KIAA0040     | KIAA0040                                                               | 1.0041 | 0      |
| 16674269 | TEX35        | testis expressed 35                                                    | 0.161  | 0.0362 |
| 16674845 | LAMC2        | laminin, gamma 2                                                       | 0.2976 | 0.0238 |
| 16674993 |              |                                                                        | 0.1734 | 0.0135 |
| 16675197 | PLA2G4A      | phospholipase A2, group IVA (cytosolic, calcium-dependent)             | 0.5621 | 0.0014 |
| 16675231 |              |                                                                        | 0.1486 | 0.0014 |
| 16675278 | RGS18        | regulator of G-protein signaling 18                                    | 0.2619 | 0.0189 |
| 16675301 | RGS1         | regulator of G-protein signaling 1                                     | 0.6734 | 0.0223 |
| 16675428 | CFHR3        | complement factor H-related 3                                          | 0.1368 | 0.0295 |
| 16675578 | PTPRC        | protein tyrosine phosphatase, receptor type, C                         | 0.4926 | 0.0068 |
| 16675763 | PKP1         | plakophilin 1 (ectodermal dysplasia/skin fragility syndrome)           | 0.1407 | 0.0172 |
| 16676049 |              |                                                                        | 0.1127 | 0.006  |
| 16676052 |              |                                                                        | 0.2142 | 0.0004 |
| 16676298 |              |                                                                        | 1.438  | 0.0251 |
| 16676308 | LOC100506838 | uncharacterized LOC100506838                                           | 0.2259 | 0.0029 |
| 16676437 | TMCC2        | transmembrane and coiled-coil domain family 2                          | 0.2187 | 0.0197 |
| 16676641 |              |                                                                        | 0.2012 | 0.0068 |
| 16676983 | G0S2         | G0/G1switch 2                                                          | 1.0317 | 0.0002 |
| 16677057 | SYT14        | synaptotagmin XIV                                                      | 0.7179 | 0.0211 |
| 16677071 | SERTAD4      | SERTA domain containing 4                                              | 0.2023 | 0.0032 |
| 16677610 |              |                                                                        | 0.3706 | 0.0081 |
| 16677651 |              |                                                                        | 0.2056 | 0.013  |
| 16677808 | FAM177B      | family with sequence similarity 177, member B                          | 0.3588 | 0.0046 |
| 16678191 | ADCK3        | aarF domain containing kinase 3                                        | 0.4366 | 0.0171 |
| 16678324 |              |                                                                        | 0.7847 | 0.0355 |

|          |              |                                                            |        |        |
|----------|--------------|------------------------------------------------------------|--------|--------|
| 16678499 | MIR4666A     | microRNA 4666a                                             | 0.2449 | 0.0003 |
| 16678828 |              |                                                            | 0.1446 | 0.0079 |
| 16678851 | KIAA1804     | mixed lineage kinase 4                                     | 0.3991 | 0.0315 |
| 16679000 |              |                                                            | 0.2275 | 0.0024 |
| 16679018 |              |                                                            | 0.134  | 0.0104 |
| 16679340 |              |                                                            | 0.1514 | 0.0399 |
| 16679435 |              |                                                            | 0.1051 | 0.0269 |
| 16679565 |              |                                                            | 0.2225 | 0.0232 |
| 16679697 | NLRP3        | NLR family, pyrin domain containing 3                      | 0.2896 | 0.0003 |
| 16679735 |              |                                                            | 0.1516 | 0.0346 |
| 16679764 | OR2L8        | olfactory receptor, family 2, subfamily L, member 8        | 0.288  | 0.0076 |
| 16679783 | OR2L3        | olfactory receptor, family 2, subfamily L, member 3        | 0.329  | 0.0108 |
| 16679916 |              |                                                            | 0.3171 | 0.0214 |
| 16679938 | OR4F29       | olfactory receptor, family 4, subfamily F, member 29       | 0.2265 | 0.0088 |
| 16680342 | TMEM240      | transmembrane protein 240                                  | 0.2091 | 0.0201 |
| 16680836 | MIR551A      | microRNA 551a                                              | 0.2399 | 0.0248 |
| 16681210 | KLHL21       | kelch-like 21 (Drosophila)                                 | 0.3487 | 0.0143 |
| 16681735 | FBXO2        | F-box protein 2                                            | 0.4419 | 0.0163 |
| 16681827 | DHRS3        | dehydrogenase/reductase (SDR family) member 3              | 0.5887 | 0.0251 |
| 16681840 |              |                                                            | 0.2547 | 0.0095 |
| 16681952 |              |                                                            | 0.2395 | 0.0243 |
| 16681957 |              |                                                            | 0.3078 | 0.001  |
| 16681960 |              |                                                            | 0.1245 | 0.0319 |
| 16681971 |              |                                                            | 0.1373 | 0.0454 |
| 16681974 | C1orf126     | chromosome 1 open reading frame 126                        | 0.2086 | 0.026  |
| 16681981 | C1orf195     | chromosome 1 open reading frame 195                        | 0.2724 | 0.0021 |
| 16682039 |              |                                                            | 0.2091 | 0.0199 |
| 16682148 | RSG1         | REM2 and RAB-like small GTPase 1                           | 0.3278 | 0.0137 |
| 16682402 | PADI2        | peptidyl arginine deiminase, type II                       | 0.4006 | 0.0131 |
| 16682792 | PLA2G2C      | phospholipase A2, group IIC                                | 0.1736 | 0.0012 |
| 16682801 |              |                                                            | 0.8855 | 0.0206 |
| 16682829 | CAMK2N1      | calcium/calmodulin-dependent protein kinase II inhibitor 1 | 0.8643 | 0.0001 |
| 16683445 | FUCA1        | fucosidase, alpha-L- 1, tissue                             | 0.5964 | 0.0086 |
| 16683460 | CNR2         | cannabinoid receptor 2 (macrophage)                        | 0.1435 | 0.0023 |
| 16683574 | C1orf201     | chromosome 1 open reading frame 201                        | 0.5292 | 0.0002 |
| 16683605 | NIPAL3       | NIPA-like domain containing 3                              | 0.5312 | 0.0024 |
| 16683612 |              |                                                            | 0.3764 | 0.0446 |
| 16683758 | SLC30A2      | solute carrier family 30 (zinc transporter), member 2      | 1.2188 | 0      |
| 16683903 | NROB2        | nuclear receptor subfamily 0, group B, member 2            | 1.1121 | 0.0421 |
| 16683908 | C1orf172     | chromosome 1 open reading frame 172                        | 0.3715 | 0.0358 |
| 16684212 |              |                                                            | 0.1585 | 0.0307 |
| 16684331 | SDC3         | syndecan 3                                                 | 0.3889 | 0.0436 |
| 16684642 | LOC100653331 | uncharacterized LOC100653331                               | 0.1611 | 0.0231 |
| 16684785 | FNDC5        | fibronectin type III domain containing 5                   | 0.3653 | 0.0296 |
| 16684902 | CSMD2        | CUB and Sushi multiple domains 2                           | 0.322  | 0.0024 |
| 16684990 |              |                                                            | 0.2098 | 0.0404 |
| 16685153 |              |                                                            | 0.5972 | 0.0027 |
| 16685198 |              |                                                            | 0.1598 | 0.0182 |
| 16685208 | TRAPPC3      | trafficking protein particle complex 3                     | 0.2564 | 0.0163 |
| 16685253 |              |                                                            | 0.1335 | 0.0399 |
| 16685851 | RIMS3        | regulating synaptic membrane exocytosis 3                  | 0.226  | 0.0058 |
| 16686000 | CLDN19       | claudin 19                                                 | 0.1698 | 0.0138 |
| 16686040 | CCDC23       | coiled-coil domain containing 23                           | 0.411  | 0.0001 |
| 16686922 | AGBL4-IT1    | AGBL4 intronic transcript 1 (non-protein coding)           | 0.1767 | 0.0435 |
| 16686990 | TTC39A       | tetratricopeptide repeat domain 39A                        | 0.4962 | 0.0009 |
| 16687067 |              |                                                            | 0.4009 | 0.0145 |
| 16687328 | C1orf123     | chromosome 1 open reading frame 123                        | 0.3236 | 0.0007 |
| 16687445 | YIPF1        | Yip1 domain family, member 1                               | 0.338  | 0.0289 |
| 16687487 | TMEM59       | transmembrane protein 59                                   | 0.2552 | 0.0232 |
| 16687583 | FAM151A      | family with sequence similarity 151, member A              | 0.3711 | 0.0015 |



|          |              |                                                                          |        |        |
|----------|--------------|--------------------------------------------------------------------------|--------|--------|
| 16687602 | TTC22        | tetratricopeptide repeat domain 22                                       | 0.2675 | 0.002  |
| 16687752 | C1orf168     | chromosome 1 open reading frame 168                                      | 0.1602 | 0.0073 |
| 16687827 | DAB1         | disabled homolog 1 (Drosophila)                                          | 0.3848 | 0.0062 |
| 16688164 | JAK1         | Janus kinase 1                                                           | 0.2317 | 0.049  |
| 16688487 | ZRANB2       | zinc finger, RAN-binding domain containing 2                             | 0.2987 | 0.0372 |
| 16688563 | LRRC53       | leucine rich repeat containing 53                                        | 0.1434 | 0.0315 |
| 16688570 |              |                                                                          | 0.2559 | 0.0222 |
| 16688665 | PIGK         | phosphatidylinositol glycan anchor biosynthesis, class K                 | 0.4569 | 0.0075 |
| 16688826 |              |                                                                          | 0.18   | 0.0285 |
| 16688937 | CTBS         | chitobiase, di-N-acetyl-                                                 | 0.3623 | 0.0219 |
| 16688961 | SSX2IP       | synovial sarcoma, X breakpoint 2 interacting protein                     | 0.2226 | 0.0337 |
| 16688992 | LPAR3        | lysophosphatidic acid receptor 3                                         | 0.7138 | 0.0366 |
| 16689223 |              |                                                                          | 0.1107 | 0.0077 |
| 16689352 | GBP2         | guanylate binding protein 2, interferon-inducible                        | 1.5063 | 0.0002 |
| 16689354 | GBP2         | guanylate binding protein 2, interferon-inducible                        | 1.5052 | 0.0004 |
| 16689400 | GBP5         | guanylate binding protein 5                                              | 0.5075 | 0.0022 |
| 16689441 | LRRC8C       | leucine rich repeat containing 8 family, member C                        | 0.2152 | 0.0283 |
| 16689456 |              |                                                                          | 0.1536 | 0.0166 |
| 16689935 |              |                                                                          | 0.2627 | 0.0346 |
| 16689969 | DPYD         | dihydropyrimidine dehydrogenase                                          | 0.7173 | 0.0056 |
| 16690011 | MIR137HG     | MIR137 host gene (non-protein coding)                                    | 0.2207 | 0.0285 |
| 16690060 |              |                                                                          | 0.16   | 0.0133 |
| 16690294 | AMY1A        | amylase, alpha 1A (salivary)                                             | 0.426  | 0.0269 |
| 16690316 |              |                                                                          | 0.1436 | 0.0161 |
| 16690518 |              |                                                                          | 0.3042 | 0.0079 |
| 16690553 | MYBPHL       | myosin binding protein H-like                                            | 0.3459 | 0.0236 |
| 16690566 | SORT1        | sortilin 1                                                               | 0.5002 | 0.0347 |
| 16690688 |              |                                                                          | 0.2173 | 0.0149 |
| 16690693 |              |                                                                          | 0.4716 | 0.0006 |
| 16690925 |              |                                                                          | 0.2488 | 0.0087 |
| 16691368 |              |                                                                          | 0.1991 | 0.008  |
| 16691396 |              |                                                                          | 0.1759 | 0.0454 |
| 16691431 |              |                                                                          | 0.1724 | 0.03   |
| 16691434 | RN5S55       | RNA, 5S ribosomal 55                                                     | 0.2286 | 0.0322 |
| 16691510 | SPAG17       | sperm associated antigen 17                                              | 0.3621 | 0.0014 |
| 16691574 | RN5S56       | RNA, 5S ribosomal 56                                                     | 0.2743 | 0.0044 |
| 16691752 |              |                                                                          | 0.419  | 0.0112 |
| 16691972 | PDE4DIP      | phosphodiesterase 4D interacting protein                                 | 0.3966 | 0.0212 |
| 16692073 | NUDT4P1      | nudix (nucleoside diphosphate linked moiety X)-type motif 4 pseudogene 1 | 0.3254 | 0.045  |
| 16692269 | LOC100509195 | uncharacterized LOC100509195                                             | 0.4156 | 0.0144 |
| 16692311 | FMO5         | flavin containing monooxygenase 5                                        | 0.354  | 0.0113 |
| 16692368 |              |                                                                          | 0.1841 | 0.0128 |
| 16692419 | LOC100509195 | uncharacterized LOC100509195                                             | 0.5288 | 0.0149 |
| 16692589 |              |                                                                          | 0.1166 | 0.0177 |
| 16692721 |              |                                                                          | 0.2561 | 0.0028 |
| 16692805 | GOLPH3L      | golgi phosphoprotein 3-like                                              | 0.3215 | 0.045  |
| 16692892 | CERS2        | ceramide synthase 2                                                      | 0.2691 | 0.0475 |
| 16693187 | TDRKH        | tudor and KH domain containing                                           | 0.4113 | 0.0189 |
| 16693222 | RORC         | RAR-related orphan receptor C                                            | 0.812  | 0.0001 |
| 16693242 | C2CD4D       | C2 calcium-dependent domain containing 4D                                | 0.1409 | 0.0237 |
| 16693247 |              |                                                                          | 0.2976 | 0.0366 |
| 16693291 | TCHH         | trichohyalin                                                             | 0.1475 | 0.0246 |
| 16693303 | HRNR         | homerin                                                                  | 0.3723 | 0.0145 |
| 16693308 | FLG          | filaggrin                                                                | 0.1781 | 0.0316 |
| 16693775 |              |                                                                          | 0.2932 | 0.0101 |
| 16694879 |              |                                                                          | 0.157  | 0.031  |
| 16694882 |              |                                                                          | 0.1833 | 0.0201 |
| 16695013 | LOC646268    | hCG1654703                                                               | 0.1818 | 0.0178 |
| 16695023 | CD1B         | CD1b molecule                                                            | 0.2114 | 0.0107 |
| 16695042 | OR6Y1        | olfactory receptor, family 6, subfamily Y, member 1                      | 0.2    | 0.0204 |

|          |              |                                                                      |        |        |
|----------|--------------|----------------------------------------------------------------------|--------|--------|
| 16695044 | OR6P1        | olfactory receptor, family 6, subfamily P, member 1                  | 0.3231 | 0.0006 |
| 16695121 | AIM2         | absent in melanoma 2                                                 | 0.2594 | 0.0097 |
| 16695142 |              |                                                                      | 0.1696 | 0.0011 |
| 16695163 |              |                                                                      | 0.3294 | 0.0003 |
| 16695169 | VSIG8        | V-set and immunoglobulin domain containing 8                         | 0.1828 | 0.0172 |
| 16695392 | SLAMF6       | SLAM family member 6                                                 | 0.3381 | 0.0084 |
| 16695437 | CD48         | CD48 molecule                                                        | 0.3005 | 0.0388 |
| 16695463 | ITLN1        | intelectin 1 (galactofuranose binding)                               | 0.2447 | 0.0269 |
| 16695475 |              |                                                                      | 0.349  | 0.0001 |
| 16695478 | ITLN2        | intelectin 2                                                         | 0.4774 | 0.0218 |
| 16695535 | ARHGAP30     | Rho GTPase activating protein 30                                     | 0.2123 | 0.0146 |
| 16695762 | C1orf111     | chromosome 1 open reading frame 111                                  | 0.181  | 0.0101 |
| 16695923 | FAM78B       | family with sequence similarity 78, member B                         | 0.241  | 0.0113 |
| 16695931 |              |                                                                      | 0.2601 | 0.0006 |
| 16695994 | CD247        | CD247 molecule                                                       | 0.2044 | 0.014  |
| 16696100 | LOC100505918 | uncharacterized LOC100505918                                         | 0.1936 | 0.0074 |
| 16696114 | XCL2         | chemokine (C motif) ligand 2                                         | 0.2434 | 0.0123 |
| 16696217 | SELP         | selectin P (granule membrane protein 140kDa, antigen CD62)           | 0.2998 | 0.0155 |
| 16696295 | KIFAP3       | kinesin-associated protein 3                                         | 0.3347 | 0.0199 |
| 16696346 | MIR1295A     | microRNA 1295a                                                       | 0.3772 | 0.0115 |
| 16696348 |              |                                                                      | 0.1846 | 0.0325 |
| 16696478 | ANKRD45      | ankyrin repeat domain 45                                             | 0.5851 | 0.0049 |
| 16696488 |              |                                                                      | 0.2985 | 0.0126 |
| 16696614 | KIAA0040     | KIAA0040                                                             | 0.5283 | 0.0025 |
| 16696624 | TNR          | tenascin R (restrictin, janusin)                                     | 0.5289 | 0.0175 |
| 16697018 | RGS16        | regulator of G-protein signaling 16                                  | 0.4604 | 0.023  |
| 16697062 | NMNAT2       | nicotinamide nucleotide adenyltransferase 2                          | 0.8875 | 0.0031 |
| 16697081 |              |                                                                      | 0.1995 | 0.014  |
| 16697387 |              |                                                                      | 0.2494 | 0.0452 |
| 16697416 |              |                                                                      | 0.2703 | 0.0008 |
| 16697647 |              |                                                                      | 0.1538 | 0.0177 |
| 16697650 |              |                                                                      | 0.2256 | 0.0434 |
| 16697668 |              |                                                                      | 0.1713 | 0.0272 |
| 16697927 |              |                                                                      | 0.7034 | 0.0024 |
| 16697930 | PHLDA3       | pleckstrin homology-like domain, family A, member 3                  | 0.3442 | 0.0177 |
| 16698034 |              |                                                                      | 0.2093 | 0.0491 |
| 16698304 | GOLT1A       | golgi transport 1A                                                   | 0.666  | 0.025  |
| 16698356 | PIK3C2B      | phosphoinositide-3-kinase, class 2, beta polypeptide                 | 0.2558 | 0.0362 |
| 16698500 | MIR135B      | microRNA 135b                                                        | 0.1745 | 0.047  |
| 16698502 | LOC284578    | uncharacterized LOC284578                                            | 0.1535 | 0.0446 |
| 16698625 | C1orf186     | chromosome 1 open reading frame 186                                  | 0.1757 | 0.0008 |
| 16698718 | PIGR         | polymeric immunoglobulin receptor                                    | 0.1992 | 0.0462 |
| 16698923 | IRF6         | interferon regulatory factor 6                                       | 1.0075 | 0.0028 |
| 16698939 | C1orf133     | chromosome 1 open reading frame 133                                  | 0.1737 | 0.0265 |
| 16698949 | KCNH1        | potassium voltage-gated channel, subfamily H (eag-related), member 1 | 0.2269 | 0.006  |
| 16699102 |              |                                                                      | 0.1981 | 0.0047 |
| 16699344 | LOC728463    | uncharacterized LOC728463                                            | 0.2323 | 0.0215 |
| 16699357 | LOC643723    | uncharacterized LOC643723                                            | 0.2375 | 0.0199 |
| 16699634 | TLR5         | toll-like receptor 5                                                 | 0.6931 | 0.0002 |
| 16699643 | SUSD4        | sushi domain containing 4                                            | 0.7915 | 0.0204 |
| 16700195 | C1orf145     | chromosome 1 open reading frame 145                                  | 0.1384 | 0.0374 |
| 16700274 | ACTA1        | actin, alpha 1, skeletal muscle                                      | 0.2331 | 0.0252 |
| 16700554 | PCNXL2       | pecanex-like 2 (Drosophila)                                          | 0.4646 | 0.0028 |
| 16700806 | LYST         | lysosomal trafficking regulator                                      | 0.4203 | 0.0134 |
| 16700878 | MIR1537      | microRNA 1537                                                        | 0.2703 | 0.0295 |
| 16701031 |              |                                                                      | 0.34   | 0.0184 |
| 16701110 | MAP1LC3C     | microtubule-associated protein 1 light chain 3 gamma                 | 0.2566 | 0.0013 |
| 16701117 |              |                                                                      | 0.3586 | 0.009  |
| 16701597 | OR14A16      | olfactory receptor, family 14, subfamily A, member 16                | 0.198  | 0.0022 |

|          |              |                                                                                         |        |        |
|----------|--------------|-----------------------------------------------------------------------------------------|--------|--------|
| 16701599 | OR11L1       | olfactory receptor, family 11, subfamily L, member 1                                    | 0.1554 | 0.0301 |
| 16701914 |              |                                                                                         | 0.1988 | 0.0112 |
| 16701941 |              |                                                                                         | 0.2236 | 0.0006 |
| 16701947 |              |                                                                                         | 0.2004 | 0.0103 |
| 16702007 | AKR1C3       | aldo-keto reductase family 1, member C3 (3-alpha hydroxysteroid dehydrogenase, type II) | 0.6234 | 0.0223 |
| 16702143 |              |                                                                                         | 0.2191 | 0.0114 |
| 16702345 |              |                                                                                         | 0.1365 | 0.0433 |
| 16702393 |              |                                                                                         | 0.2151 | 0.037  |
| 16702431 | ECHDC3       | enoyl CoA hydratase domain containing 3                                                 | 0.4531 | 0.0009 |
| 16702501 |              |                                                                                         | 0.4579 | 0.0402 |
| 16702547 | OPTN         | optineurin                                                                              | 0.3805 | 0.0118 |
| 16702800 | STAM         | signal transducing adaptor molecule (SH3 domain and ITAM motif) 1                       | 0.3179 | 0.0478 |
| 16702982 | C10orf112    | chromosome 10 open reading frame 112                                                    | 0.2175 | 0.0403 |
| 16703114 | COMMD3       | COMM domain containing 3                                                                | 0.2669 | 0.0249 |
| 16703150 | SPAG6        | sperm associated antigen 6                                                              | 0.4687 | 0.0009 |
| 16703251 | KIAA1217     | KIAA1217                                                                                | 0.637  | 0.0096 |
| 16703301 | THNSL1       | threonine synthase-like 1 ( <i>S. cerevisiae</i> )                                      | 0.4093 | 0.0005 |
| 16703311 | GPR158       | G protein-coupled receptor 158                                                          | 0.3636 | 0.0154 |
| 16703340 | MYO3A        | myosin IIIA                                                                             | 0.9663 | 0.001  |
| 16703382 | GAD2         | glutamate decarboxylase 2 (pancreatic islets and brain, 65kDa)                          | 0.4647 | 0.0316 |
| 16703407 | APBB1IP      | amyloid beta (A4) precursor protein-binding, family B, member 1 interacting protein     | 0.706  | 0.0125 |
| 16703429 | RN5S307      | RNA, 5S ribosomal 307                                                                   | 0.2398 | 0.0428 |
| 16703471 |              |                                                                                         | 0.2017 | 0.0219 |
| 16703514 |              |                                                                                         | 0.138  | 0.0099 |
| 16703581 |              |                                                                                         | 0.1577 | 0.0322 |
| 16703595 |              |                                                                                         | 0.2392 | 0.0043 |
| 16703598 |              |                                                                                         | 0.2135 | 0.0317 |
| 16703628 |              |                                                                                         | 0.1797 | 0.009  |
| 16703934 | ANKRD30A     | ankyrin repeat domain 30A                                                               | 0.1722 | 0.0349 |
| 16704006 |              |                                                                                         | 0.1465 | 0.04   |
| 16704254 | ZNF32-AS1    | ZNF32 antisense RNA 1 (non-protein coding)                                              | 0.331  | 0.0171 |
| 16704257 | ZNF32-AS2    | ZNF32 antisense RNA 2 (non-protein coding)                                              | 0.1978 | 0.0314 |
| 16704320 | RASSF4       | Ras association (RalGDS/AF-6) domain family member 4                                    | 0.2405 | 0.0317 |
| 16704542 | FAM21B       | family with sequence similarity 21, member B                                            | 0.321  | 0.0011 |
| 16704607 | FAM25G       | family with sequence similarity 25, member G                                            | 0.2422 | 0.0233 |
| 16704822 | SLC18A3      | solute carrier family 18 (vesicular acetylcholine), member 3                            | 0.5693 | 0.0086 |
| 16704837 | FAM21C       | family with sequence similarity 21, member C                                            | 0.3441 | 0.0047 |
| 16704920 | FAM21A       | family with sequence similarity 21, member A                                            | 0.3294 | 0.0003 |
| 16705006 | MIR605       | microRNA 605                                                                            | 0.6655 | 0.0124 |
| 16705039 |              |                                                                                         | 0.3834 | 0.0272 |
| 16705116 | FAM133CP     | family with sequence similarity 133, member C, pseudogene                               | 0.2183 | 0.0026 |
| 16705130 | PHYHIPL      | phytanoyl-CoA 2-hydroxylase interacting protein-like                                    | 1.0592 | 0.0403 |
| 16705151 |              |                                                                                         | 1.0082 | 0.035  |
| 16705154 |              |                                                                                         | 0.3249 | 0.0031 |
| 16705174 | LOC100507058 | uncharacterized LOC100507058                                                            | 0.3286 | 0.0326 |
| 16705188 | C10orf107    | chromosome 10 open reading frame 107                                                    | 1.3698 | 0.0003 |
| 16705808 |              |                                                                                         | 0.2478 | 0.0074 |
| 16705839 |              |                                                                                         | 0.3129 | 0.001  |
| 16705940 |              |                                                                                         | 0.1579 | 0.0231 |
| 16706459 |              |                                                                                         | 0.1742 | 0.0469 |
| 16706708 |              |                                                                                         | 0.1363 | 0.0476 |
| 16706772 | LOC170425    | uncharacterized LOC170425                                                               | 0.1706 | 0.018  |
| 16706896 | SNCG         | synuclein, gamma (breast cancer-specific protein 1)                                     | 1.1148 | 0.009  |
| 16707149 | FAS          | Fas (TNF receptor superfamily, member 6)                                                | 0.7528 | 0.0032 |
| 16707169 |              |                                                                                         | 0.6142 | 0.0011 |

|          |              |                                                                  |        |        |
|----------|--------------|------------------------------------------------------------------|--------|--------|
| 16707323 |              |                                                                  | 0.1962 | 0.0245 |
| 16707631 | PLCE1        | phospholipase C, epsilon 1                                       | 1.0514 | 0.0035 |
| 16707670 |              |                                                                  | 0.188  | 0.016  |
| 16707789 |              |                                                                  | 0.1846 | 0.0386 |
| 16707836 | CC2D2B       | coiled-coil and C2 domain containing 2B                          | 0.2201 | 0.0328 |
| 16707951 | LOC100505540 | uncharacterized LOC100505540                                     | 0.1485 | 0.0345 |
| 16708020 | HOGA1        | 4-hydroxy-2-oxoglutarate aldolase 1                              | 0.4771 | 0.0014 |
| 16708146 |              |                                                                  | 0.3399 | 0.0005 |
| 16708192 | ABCC2        | ATP-binding cassette, sub-family C (CFTR/MRP), member 2          | 1.2788 | 0.003  |
| 16708461 |              |                                                                  | 0.1139 | 0.0435 |
| 16708489 | DPCD         | deleted in primary ciliary dyskinesia homolog (mouse)            | 0.3019 | 0.0451 |
| 16708794 | LOC729020    | rcRPE                                                            | 0.1674 | 0.0263 |
| 16708796 | INA          | internexin neuronal intermediate filament protein, alpha         | 0.8734 | 0.0221 |
| 16708862 | NEURL        | neuralized homolog (Drosophila)                                  | 0.1528 | 0.0356 |
| 16708933 | GSTO2        | glutathione S-transferase omega 2                                | 0.3755 | 0.0489 |
| 16709060 |              |                                                                  | 0.1776 | 0.0108 |
| 16709072 | ADD3         | adducin 3 (gamma)                                                | 0.6337 | 0.001  |
| 16709268 | ACSL5        | acyl-CoA synthetase long-chain family member 5                   | 0.4984 | 0.0363 |
| 16709363 |              |                                                                  | 0.101  | 0.0341 |
| 16709367 | HABP2        | hyaluronan binding protein 2                                     | 0.1595 | 0.038  |
| 16709506 |              |                                                                  | 0.2138 | 0.0472 |
| 16709610 | PNLIPRP3     | pancreatic lipase-related protein 3                              | 0.852  | 0.0398 |
| 16709747 |              |                                                                  | 0.1446 | 0.0237 |
| 16709760 | CASC2        | cancer susceptibility candidate 2 (non-protein coding)           | 0.2789 | 0.0488 |
| 16709865 | INPP5F       | inositol polyphosphate-5-phosphatase F                           | 0.5149 | 0.0144 |
| 16709936 | PPAPDC1A     | phosphatidic acid phosphatase type 2 domain containing 1A        | 0.9623 | 0.0009 |
| 16710608 | MGMT         | O-6-methylguanine-DNA methyltransferase                          | 0.3283 | 0.0126 |
| 16710740 | LRRC27       | leucine rich repeat containing 27                                | 0.2269 | 0.0172 |
| 16710852 | KNDC1        | kinase non-catalytic C-lobe domain (KIND) containing 1           | 0.4783 | 0.0012 |
| 16711360 |              |                                                                  | 0.2152 | 0.0071 |
| 16711463 |              |                                                                  | 0.5276 | 0.0175 |
| 16711723 |              |                                                                  | 0.241  | 0.0175 |
| 16711864 |              |                                                                  | 0.1811 | 0.0179 |
| 16712312 | LOC100129213 | uncharacterized LOC100129213                                     | 0.2067 | 0.0007 |
| 16712353 |              |                                                                  | 0.2018 | 0.0266 |
| 16712357 |              |                                                                  | 0.3811 | 0.0026 |
| 16712482 | PIP4K2A      | phosphatidylinositol-5-phosphate 4-kinase, type II, alpha        | 0.4876 | 0.0287 |
| 16712503 |              |                                                                  | 0.1496 | 0.0183 |
| 16712528 |              |                                                                  | 0.4035 | 0.0115 |
| 16712531 | ARHGAP21     | Rho GTPase activating protein 21                                 | 0.5174 | 0.0085 |
| 16712598 | GPR158-AS1   | GPR158 antisense RNA 1 (non-protein coding)                      | 0.1305 | 0.0043 |
| 16712612 |              |                                                                  | 0.1714 | 0.0386 |
| 16712786 | ARMC4        | armadillo repeat containing 4                                    | 0.3053 | 0.0038 |
| 16712825 | MPP7         | membrane protein, palmitoylated 7 (MAGUK p55 subfamily member 7) | 1.3748 | 0      |
| 16713019 | ZNF438       | zinc finger protein 438                                          | 0.281  | 0.0302 |
| 16713052 |              |                                                                  | 0.1399 | 0.0483 |
| 16713330 | ZNF248       | zinc finger protein 248                                          | 0.3321 | 0.0102 |
| 16713498 | ZNF32        | zinc finger protein 32                                           | 0.3695 | 0.0023 |
| 16713652 |              |                                                                  | 0.1842 | 0.0488 |
| 16713760 | LOC728643    | heterogeneous nuclear ribonucleoprotein A1 pseudogene            | 0.5745 | 0.0034 |
| 16713779 | FAM25G       | family with sequence similarity 25, member G                     | 0.2245 | 0.0296 |
| 16713860 |              |                                                                  | 0.231  | 0.0039 |
| 16713948 |              |                                                                  | 0.2292 | 0.0004 |
| 16713955 | FAM25G       | family with sequence similarity 25, member G                     | 0.2032 | 0.0313 |
| 16714027 |              |                                                                  | 0.1839 | 0.0314 |
| 16714030 | ARHGAP22     | Rho GTPase activating protein 22                                 | 0.2208 | 0.0487 |

|          |              |                                                                        |        |        |
|----------|--------------|------------------------------------------------------------------------|--------|--------|
| 16714170 | OGDHL        | oxoglutarate dehydrogenase-like                                        | 0.9005 | 0.0002 |
| 16714237 |              |                                                                        | 0.1842 | 0.0488 |
| 16714368 |              |                                                                        | 0.2095 | 0.0161 |
| 16714375 |              |                                                                        | 0.7312 | 0.0166 |
| 16714433 | PCDH15       | protocadherin-related 15                                               | 0.4851 | 0.0494 |
| 16714493 |              |                                                                        | 0.2737 | 0.0181 |
| 16714501 |              |                                                                        | 0.2164 | 0.0274 |
| 16714528 |              |                                                                        | 0.4818 | 0.0001 |
| 16714531 |              |                                                                        | 0.3764 | 0      |
| 16714534 | MIR3924      | microRNA 3924                                                          | 0.5727 | 0.0072 |
| 16714581 | SLC16A9      | solute carrier family 16, member 9 (monocarboxylic acid transporter 9) | 0.9064 | 0.0348 |
| 16714720 |              |                                                                        | 0.2076 | 0.0247 |
| 16714725 | TMEM26       | transmembrane protein 26                                               | 0.8628 | 0.0372 |
| 16714939 |              |                                                                        | 0.3257 | 0.0009 |
| 16715170 | PRF1         | perforin 1 (pore forming protein)                                      | 0.2452 | 0.0383 |
| 16715241 | PSAP         | prosaposin                                                             | 0.2458 | 0.0468 |
| 16715434 | TTC18        | tetratricopeptide repeat domain 18                                     | 0.549  | 0.0156 |
| 16715738 | DUSP13       | dual specificity phosphatase 13                                        | 0.1787 | 0.0265 |
| 16716124 | LOC642934    | uncharacterized LOC642934                                              | 0.3714 | 0.0278 |
| 16716213 | MMRN2        | multimerin 2                                                           | 0.4726 | 0.002  |
| 16716327 | RNLS         | renalase, FAD-dependent amine oxidase                                  | 0.8347 | 0.0021 |
| 16716339 |              |                                                                        | 0.2845 | 0.0071 |
| 16716341 | ANKRD22      | ankyrin repeat domain 22                                               | 0.2655 | 0.0259 |
| 16716367 |              |                                                                        | 0.5939 | 0.0373 |
| 16716443 | FLJ37201     | tigger transposable element derived 2 pseudogene                       | 0.2258 | 0.0361 |
| 16716454 |              |                                                                        | 0.3164 | 0.0001 |
| 16716469 | HTR7         | 5-hydroxytryptamine (serotonin) receptor 7, adenylate cyclase-coupled  | 0.2074 | 0.014  |
| 16716542 |              |                                                                        | 0.265  | 0.0489 |
| 16716590 | MYOF         | myoferlin                                                              | 1.0106 | 0.0036 |
| 16716657 | RN5S323      | RNA, 5S ribosomal 323                                                  | 0.1582 | 0.0212 |
| 16716700 |              |                                                                        | 0.2612 | 0.0096 |
| 16716715 |              |                                                                        | 0.1471 | 0.0491 |
| 16716718 | LOC100128054 | uncharacterized LOC100128054                                           | 0.4904 | 0.0012 |
| 16717005 | PIK3AP1      | phosphoinositide-3-kinase adaptor protein 1                            | 0.4964 | 0.0386 |
| 16717030 | MIR607       | microRNA 607                                                           | 0.1369 | 0.0063 |
| 16717032 | SLIT1        | slit homolog 1 (Drosophila)                                            | 0.1589 | 0.0172 |
| 16717224 | MORN4        | MORN repeat containing 4                                               | 0.39   | 0.0183 |
| 16717314 | HPS1         | Hermansky-Pudlak syndrome 1                                            | 0.293  | 0.0201 |
| 16717412 | DNMBP        | dynamamin binding protein                                              | 0.3483 | 0.0207 |
| 16717560 |              |                                                                        | 0.2136 | 0.0148 |
| 16717697 |              |                                                                        | 0.1485 | 0.0317 |
| 16717869 | LDB1         | LIM domain binding 1                                                   | 0.6504 | 0      |
| 16717986 | NT5C2        | 5'-nucleotidase, cytosolic II                                          | 0.3297 | 0.0046 |
| 16718473 | ZDHHC6       | zinc finger, DHHC-type containing 6                                    | 0.3211 | 0.0338 |
| 16718553 | DCLRE1A      | DNA cross-link repair 1A                                               | 0.351  | 0.0229 |
| 16718670 | GFRA1        | GDNF family receptor alpha 1                                           | 0.4118 | 0.0005 |
| 16718836 | PRLHR        | prolactin releasing hormone receptor                                   | 0.3882 | 0.0038 |
| 16718938 | RGS10        | regulator of G-protein signaling 10                                    | 0.5479 | 0.0191 |
| 16718977 |              |                                                                        | 0.28   | 0.0029 |
| 16719171 | CPXM2        | carboxypeptidase X (M14 family), member 2                              | 0.4629 | 0.0468 |
| 16719208 |              |                                                                        | 0.1763 | 0.0126 |
| 16719233 | OAT          | ornithine aminotransferase                                             | 0.5486 | 0.0145 |
| 16719254 | NKX1-2       | NK1 homeobox 2                                                         | 0.1367 | 0.0188 |
| 16719548 |              |                                                                        | 0.1711 | 0.0134 |
| 16719598 |              |                                                                        | 0.5819 | 0.0095 |
| 16719947 | MIR1324      | microRNA 1324                                                          | 0.1213 | 0.0113 |
| 16720044 |              |                                                                        | 0.2135 | 0.0077 |
| 16720601 | MUC5B        | mucin 5B, oligomeric mucus/gel-forming                                 | 0.1068 | 0.0476 |
| 16720997 | C11orf36     | chromosome 11 open reading frame 36                                    | 0.1292 | 0.0458 |

|          |             |                                                                 |        |        |
|----------|-------------|-----------------------------------------------------------------|--------|--------|
| 16721225 |             |                                                                 | 0.2545 | 0.0044 |
| 16721280 | TRIM22      | tripartite motif containing 22                                  | 0.4841 | 0.0039 |
| 16721304 | OR56B1      | olfactory receptor, family 56, subfamily B, member 1            | 0.2185 | 0.0085 |
| 16721307 | OR52N4      | olfactory receptor, family 52, subfamily N, member 4            | 0.227  | 0.017  |
| 16721310 | OR52N2      | olfactory receptor, family 52, subfamily N, member 2            | 0.2585 | 0.0445 |
| 16721313 | OR52E4      | olfactory receptor, family 52, subfamily E, member 4            | 0.3037 | 0.0389 |
| 16721329 |             |                                                                 | 0.1299 | 0.0243 |
| 16721672 |             |                                                                 | 0.3912 | 0.0274 |
| 16721680 |             |                                                                 | 0.5382 | 0.0438 |
| 16721765 |             |                                                                 | 0.1537 | 0.0206 |
| 16722026 |             |                                                                 | 0.2555 | 0.0344 |
| 16722360 |             |                                                                 | 0.2006 | 0.0063 |
| 16722382 |             |                                                                 | 0.1685 | 0.0281 |
| 16722412 | NUCB2       | nucleobindin 2                                                  | 0.2373 | 0.0275 |
| 16722544 | MRGPRX3     | MAS-related GPR, member X3                                      | 0.2257 | 0.0273 |
| 16722681 |             |                                                                 | 0.1432 | 0.0056 |
| 16722880 |             |                                                                 | 0.268  | 0.0059 |
| 16722962 |             |                                                                 | 0.2583 | 0.0221 |
| 16723008 |             |                                                                 | 0.212  | 0.0022 |
| 16723200 |             |                                                                 | 0.2082 | 0.001  |
| 16723318 | PRRG4       | proline rich Gla (G-carboxyglutamic acid) 4 (transmembrane)     | 0.4469 | 0.0203 |
| 16723353 | DEPDC7      | DEP domain containing 7                                         | 0.1882 | 0.0218 |
| 16723369 | TCP11L1     | t-complex 11 (mouse)-like 1                                     | 0.3019 | 0.017  |
| 16723422 | C11orf41    | chromosome 11 open reading frame 41                             | 0.7068 | 0.0081 |
| 16723447 |             |                                                                 | 0.7236 | 0.0038 |
| 16723450 |             |                                                                 | 0.1857 | 0.0239 |
| 16723614 | CD44        | CD44 molecule (Indian blood group)                              | 0.5968 | 0.0177 |
| 16724190 | CRY2        | cryptochrome 2 (photolyase-like)                                | 0.1365 | 0.0394 |
| 16724266 |             |                                                                 | 0.2197 | 0.0068 |
| 16724344 | MIR4688     | microRNA 4688                                                   | 0.1981 | 0.0398 |
| 16724633 | PTPRJ       | protein tyrosine phosphatase, receptor type, J                  | 0.3494 | 0.0214 |
| 16724679 | OR4A47      | olfactory receptor, family 4, subfamily A, member 47            | 0.192  | 0.0169 |
| 16724706 | LOC646813   | DEAH (Asp-Glu-Ala-His) box polypeptide 9 pseudogene             | 0.1906 | 0.0118 |
| 16724715 | TRIM48      | tripartite motif containing 48                                  | 0.2975 | 0.0422 |
| 16724789 | OR8J1       | olfactory receptor, family 8, subfamily J, member 1             | 0.1122 | 0.0445 |
| 16725015 |             |                                                                 | 0.1839 | 0.0291 |
| 16725112 | STX3        | syntaxin 3                                                      | 0.5682 | 0.0053 |
| 16725132 | OR10V2P     | olfactory receptor, family 10, subfamily V, member 2 pseudogene | 0.1744 | 0.0419 |
| 16725172 | MS4A2       | membrane-spanning 4-domains, subfamily A, member 2              | 0.2411 | 0.0089 |
| 16725252 | MS4A1       | membrane-spanning 4-domains, subfamily A, member 1              | 0.1708 | 0.0312 |
| 16725670 | DAGLA       | diacylglycerol lipase, alpha                                    | 0.7303 | 0.001  |
| 16725783 | BEST1       | bestrophin 1                                                    | 0.1603 | 0.021  |
| 16726081 | RARRES3     | retinoic acid receptor responder (tazarotene induced) 3         | 0.6581 | 0.0046 |
| 16726089 |             |                                                                 | 0.1541 | 0.0089 |
| 16726520 |             |                                                                 | 0.217  | 0.0202 |
| 16727149 | CTSW        | cathepsin W                                                     | 0.2681 | 0.0028 |
| 16727388 |             |                                                                 | 0.2338 | 0.0463 |
| 16727413 | PELI3       | pellino E3 ubiquitin protein ligase family member 3             | 0.223  | 0.046  |
| 16728331 | FADD        | Fas (TNFRSF6)-associated via death domain                       | 0.1608 | 0.0496 |
| 16728513 | KRTAP5-10   | keratin associated protein 5-10                                 | 0.1928 | 0.023  |
| 16728705 |             |                                                                 | 0.1633 | 0.0416 |
| 16728727 | STARD10-AS1 | STARD10 antisense RNA 1 (non-protein coding)                    | 0.3742 | 0.0063 |
| 16729185 |             |                                                                 | 0.168  | 0.0142 |
| 16729527 |             |                                                                 | 0.3161 | 0.0299 |
| 16729530 |             |                                                                 | 0.2614 | 0.0414 |
| 16729540 |             |                                                                 | 0.2573 | 0.0208 |
| 16729835 |             |                                                                 | 0.2016 | 0.025  |
| 16730033 | CCDC67      | coiled-coil domain containing 67                                | 0.363  | 0.0273 |
| 16730250 |             |                                                                 | 0.1947 | 0.0026 |

|          |              |                                                                 |        |        |
|----------|--------------|-----------------------------------------------------------------|--------|--------|
| 16730385 | RN5S347      | RNA, 5S ribosomal 347                                           | 0.1837 | 0.0435 |
| 16730522 | BIRC3        | baculoviral IAP repeat containing 3                             | 0.3618 | 0.0438 |
| 16730564 |              |                                                                 | 0.1708 | 0.0023 |
| 16730754 |              |                                                                 | 0.1428 | 0.0391 |
| 16730788 | RAB39A       | RAB39A, member RAS oncogene family                              | 0.5486 | 0.0176 |
| 16730819 | ACAT1        | acetyl-CoA acetyltransferase 1                                  | 0.4514 | 0.0025 |
| 16730932 |              |                                                                 | 0.172  | 0.0345 |
| 16731010 | C11orf93     | chromosome 11 open reading frame 93                             | 0.5368 | 0.0129 |
| 16731132 | DIXDC1       | DIX domain containing 1                                         | 0.6684 | 0.0034 |
| 16731225 | BCO2         | beta-carotene oxygenase 2                                       | 0.7466 | 0.0324 |
| 16731339 | TTC12        | tetratricopeptide repeat domain 12                              | 0.3177 | 0.0026 |
| 16731795 | CD3E         | CD3e molecule, epsilon (CD3-TCR complex)                        | 0.3521 | 0.0023 |
| 16731806 | CD3G         | CD3g molecule, gamma (CD3-TCR complex)                          | 0.2518 | 0.0005 |
| 16732224 | ABCG4        | ATP-binding cassette, sub-family G (WHITE), member 4            | 0.1417 | 0.0114 |
| 16732322 | LOC100499227 | uncharacterized LOC100499227                                    | 0.1695 | 0.0117 |
| 16732381 | LOC729173    | uncharacterized LOC729173                                       | 0.1558 | 0.045  |
| 16732584 | SORL1        | sortilin-related receptor, L(DLR class) A repeats containing    | 0.8744 | 0.0219 |
| 16732661 |              |                                                                 | 0.1159 | 0.0239 |
| 16732797 | OR10G4       | olfactory receptor, family 10, subfamily G, member 4            | 0.2398 | 0.0144 |
| 16732807 | VWA5A        | von Willebrand factor A domain containing 5A                    | 0.639  | 0.0017 |
| 16733325 | KIRREL3-AS2  | KIRREL3 antisense RNA 2 (non-protein coding)                    | 0.1528 | 0.0062 |
| 16733377 | FLI1         | Friend leukemia virus integration 1                             | 0.3165 | 0.0087 |
| 16733589 |              |                                                                 | 0.1561 | 0.0015 |
| 16733719 | GLB1L2       | galactosidase, beta 1-like 2                                    | 0.5896 | 0.0021 |
| 16734092 | CEND1        | cell cycle exit and neuronal differentiation 1                  | 0.2037 | 0.0347 |
| 16734291 | KRTAP5-4     | keratin associated protein 5-4                                  | 0.3792 | 0.0066 |
| 16734336 |              |                                                                 | 0.2616 | 0.0096 |
| 16734434 |              |                                                                 | 0.1396 | 0.0266 |
| 16734644 | OR7E12P      | olfactory receptor, family 7, subfamily E, member 12 pseudogene | 0.2662 | 0.0463 |
| 16734672 |              |                                                                 | 0.2165 | 0.0066 |
| 16734742 |              |                                                                 | 0.3301 | 0.0271 |
| 16734758 | OR52B4       | olfactory receptor, family 52, subfamily B, member 4            | 0.148  | 0.0102 |
| 16734811 | OR51G2       | olfactory receptor, family 51, subfamily G, member 2            | 0.2182 | 0.0391 |
| 16734814 | OR51G1       | olfactory receptor, family 51, subfamily G, member 1            | 0.1079 | 0.0417 |
| 16734898 | OR51B2       | olfactory receptor, family 51, subfamily B, member 2            | 0.159  | 0.0157 |
| 16734956 | OR52N1       | olfactory receptor, family 52, subfamily N, member 1            | 0.2846 | 0.0386 |
| 16734961 | OR52E8       | olfactory receptor, family 52, subfamily E, member 8            | 0.298  | 0.0301 |
| 16734965 | OR56A5       | olfactory receptor, family 56, subfamily A, member 5            | 0.2055 | 0.0307 |
| 16734985 | OR52B2       | olfactory receptor, family 52, subfamily B, member 2            | 0.1535 | 0.0365 |
| 16735152 | TPP1         | tripeptidyl peptidase I                                         | 0.3845 | 0.0295 |
| 16735231 | ZNF214       | zinc finger protein 214                                         | 0.5545 | 0.0008 |
| 16735375 | STK33        | serine/threonine kinase 33                                      | 0.7206 | 0.0044 |
| 16735946 | LOC100506352 | uncharacterized LOC100506352                                    | 0.1629 | 0.0292 |
| 16736726 | SVIP         | small VCP/p97-interacting protein                               | 0.4815 | 0.0058 |
| 16736747 |              |                                                                 | 0.1251 | 0.0145 |
| 16736931 |              |                                                                 | 0.2569 | 0.0321 |
| 16736966 | DCDC5        | doublecortin domain containing 5                                | 0.1992 | 0.0297 |
| 16737019 | DCDC1        | doublecortin domain containing 1                                | 0.289  | 0.0012 |
| 16737099 |              |                                                                 | 0.1595 | 0.0388 |
| 16737189 | C11orf41     | chromosome 11 open reading frame 41                             | 0.3681 | 0.0488 |
| 16737194 | C11orf91     | chromosome 11 open reading frame 91                             | 0.207  | 0.0465 |
| 16737200 | CD59         | CD59 molecule, complement regulatory protein                    | 0.5794 | 0.0089 |
| 16737528 |              |                                                                 | 0.1873 | 0.0283 |
| 16738345 | LOC100507561 | ankyrin repeat domain-containing protein 33B-like               | 0.2516 | 0.0035 |
| 16738395 | OR5AP2       | olfactory receptor, family 5, subfamily AP, member 2            | 0.1788 | 0.0117 |
| 16738615 | OR5B2        | olfactory receptor, family 5, subfamily B, member 2             | 0.2314 | 0.003  |
| 16738622 |              |                                                                 | 0.122  | 0.0357 |
| 16738701 |              |                                                                 | 0.1593 | 0.0437 |
| 16738771 |              |                                                                 | 0.5232 | 0.0326 |

|          |              |                                                                   |        |        |
|----------|--------------|-------------------------------------------------------------------|--------|--------|
| 16738803 | TCN1         | transcobalamin I (vitamin B12 binding protein, R binder family)   | 0.5227 | 0.0004 |
| 16738894 |              |                                                                   | 0.5869 | 0.0031 |
| 16739235 |              |                                                                   | 0.202  | 0.02   |
| 16739239 | SCGB1D4      | secretoglobin, family 1D, member 4                                | 0.2219 | 0.0078 |
| 16739250 |              |                                                                   | 0.145  | 0.0427 |
| 16739796 | RCOR2        | REST corepressor 2                                                | 0.1821 | 0.0311 |
| 16739830 |              |                                                                   | 0.6345 | 0.0057 |
| 16740238 | BATF2        | basic leucine zipper transcription factor, ATF-like 2             | 0.1673 | 0.0447 |
| 16740549 |              |                                                                   | 0.2053 | 0.0282 |
| 16740770 | B3GNT1       | UDP-GlcNAc:betaGal beta-1,3-N-acetylglucosaminyltransferase 1     | 0.26   | 0.038  |
| 16740828 | CTSF         | cathepsin F                                                       | 0.7019 | 0.001  |
| 16740997 | PTPRCAP      | protein tyrosine phosphatase, receptor type, C-associated protein | 0.4593 | 0.0003 |
| 16741556 | ZNF705E      | zinc finger protein 705E                                          | 0.1858 | 0.031  |
| 16742228 | MIR326       | microRNA 326                                                      | 0.1784 | 0.0329 |
| 16742294 | MAP6         | microtubule-associated protein 6                                  | 0.548  | 0.0263 |
| 16742744 |              |                                                                   | 0.3604 | 0.0133 |
| 16742747 |              |                                                                   | 0.1865 | 0.0321 |
| 16742760 |              |                                                                   | 0.1383 | 0.0074 |
| 16742777 |              |                                                                   | 0.1687 | 0.0261 |
| 16742879 | DLG2         | discs, large homolog 2 (Drosophila)                               | 0.5539 | 0.0092 |
| 16743251 |              |                                                                   | 0.5141 | 0      |
| 16743449 |              |                                                                   | 0.2191 | 0.0055 |
| 16743560 |              |                                                                   | 0.1989 | 0.0156 |
| 16743566 |              |                                                                   | 0.1561 | 0.0263 |
| 16743793 |              |                                                                   | 0.4396 | 0.0024 |
| 16743797 |              |                                                                   | 0.4533 | 0.0009 |
| 16743803 |              |                                                                   | 0.197  | 0.0302 |
| 16743806 |              |                                                                   | 0.2789 | 0.0156 |
| 16743809 |              |                                                                   | 0.2565 | 0.0458 |
| 16743854 | CASP4        | caspase 4, apoptosis-related cysteine peptidase                   | 0.3597 | 0.0194 |
| 16743890 | CASP1        | caspase 1, apoptosis-related cysteine peptidase                   | 0.3339 | 0.0168 |
| 16743912 | CARD16       | caspase recruitment domain family, member 16                      | 0.3118 | 0.0018 |
| 16743938 |              |                                                                   | 0.453  | 0.015  |
| 16744247 | POU2AF1      | POU class 2 associating factor 1                                  | 0.1445 | 0.0228 |
| 16744949 | SCN4B        | sodium channel, voltage-gated, type IV, beta subunit              | 0.2212 | 0.0035 |
| 16744967 | AMICA1       | adhesion molecule, interacts with CXADR antigen 1                 | 0.3136 | 0.0327 |
| 16745016 | CD3D         | CD3d molecule, delta (CD3-TCR complex)                            | 0.4425 | 0.001  |
| 16745452 | LOC649133    | uncharacterized LOC649133                                         | 0.1188 | 0.0408 |
| 16745467 |              |                                                                   | 0.232  | 0.0012 |
| 16745635 | OR10G7       | olfactory receptor, family 10, subfamily G, member 7              | 0.3668 | 0.0007 |
| 16745658 | SIAE         | sialic acid acetyltransferase                                     | 0.3942 | 0.0222 |
| 16745752 | HEPN1        | hepatocellular carcinoma, down-regulated 1                        | 0.1508 | 0.0038 |
| 16745843 | PATE2        | prostate and testis expressed 2                                   | 0.1928 | 0.0049 |
| 16745992 |              |                                                                   | 0.2345 | 0.029  |
| 16746095 |              |                                                                   | 0.1621 | 0.0259 |
| 16746225 | LOC100507431 | uncharacterized LOC100507431                                      | 0.1074 | 0.0491 |
| 16746269 |              |                                                                   | 0.3135 | 0.0006 |
| 16746316 |              |                                                                   | 0.1484 | 0.0308 |
| 16746450 | B3GAT1       | beta-1,3-glucuronyltransferase 1 (glucuronosyltransferase P)      | 0.1701 | 0.005  |
| 16746466 |              |                                                                   | 0.1604 | 0.0023 |
| 16746492 | IQSEC3       | IQ motif and Sec7 domain 3                                        | 0.2805 | 0.0272 |
| 16746574 |              |                                                                   | 0.246  | 0.0402 |
| 16746577 |              |                                                                   | 0.2065 | 0.0405 |
| 16746798 | CACNA1C-IT1  | CACNA1C intronic transcript 1 (non-protein coding)                | 0.1848 | 0.0462 |
| 16746946 | TSPAN9-IT1   | TSPAN9 intronic transcript 1 (non-protein coding)                 | 0.1699 | 0.0292 |
| 16746959 | PRMT8        | protein arginine methyltransferase 8                              | 0.1023 | 0.0341 |



|          |              |                                                                               |        |        |
|----------|--------------|-------------------------------------------------------------------------------|--------|--------|
| 16747077 | NDUFA9       | NADH dehydrogenase (ubiquinone) 1 alpha subcomplex, 9, 39kDa                  | 0.3336 | 0.0359 |
| 16747211 | PLEKHG6      | pleckstrin homology domain containing, family G (with RhoGef domain) member 6 | 0.1761 | 0.0091 |
| 16747270 | TAPBPL       | TAP binding protein-like                                                      | 0.4543 | 0.0012 |
| 16747417 | CD4          | CD4 molecule                                                                  | 0.4437 | 0.0018 |
| 16747566 | RPL13P5      | ribosomal protein L13 pseudogene 5                                            | 0.3544 | 0.0079 |
| 16747658 |              |                                                                               | 0.1985 | 0.0308 |
| 16747665 | EMG1         | EMG1 nucleolar protein homolog ( <i>S. cerevisiae</i> )                       | 0.2505 | 0.0205 |
| 16747852 | NANOG        | Nanog homeobox                                                                | 0.3542 | 0.0109 |
| 16747986 |              |                                                                               | 0.2469 | 0.0066 |
| 16748010 |              |                                                                               | 0.5414 | 0.0031 |
| 16748205 | CLEC2D       | C-type lectin domain family 2, member D                                       | 0.1766 | 0.0467 |
| 16748224 |              |                                                                               | 0.1192 | 0.0449 |
| 16748275 | CLEC9A       | C-type lectin domain family 9, member A                                       | 0.4603 | 0.0029 |
| 16748351 |              |                                                                               | 0.1357 | 0.0487 |
| 16748498 | MIR613       | microRNA 613                                                                  | 0.162  | 0.0162 |
| 16748529 | GPRC5A       | G protein-coupled receptor, family C, group 5, member A                       | 1.1293 | 0.0006 |
| 16748539 | LOC100506314 | uncharacterized LOC100506314                                                  | 0.2827 | 0.0301 |
| 16748675 | H2AFJ        | H2A histone family, member J                                                  | 0.374  | 0.0461 |
| 16748831 | MIR3974      | microRNA 3974                                                                 | 0.2411 | 0.0468 |
| 16748835 | PIK3C2G      | phosphoinositide-3-kinase, class 2, gamma polypeptide                         | 0.5296 | 0.0461 |
| 16749216 |              |                                                                               | 0.1261 | 0.0262 |
| 16749398 | STK38L       | serine/threonine kinase 38 like                                               | 0.2391 | 0.0312 |
| 16749423 | ARNTL2       | aryl hydrocarbon receptor nuclear translocator-like 2                         | 0.5951 | 0.0003 |
| 16749575 | RN5S355      | RNA, 5S ribosomal 355                                                         | 0.3167 | 0.0451 |
| 16749747 | C12orf35     | chromosome 12 open reading frame 35                                           | 0.4489 | 0.013  |
| 16749885 |              |                                                                               | 0.1939 | 0.0362 |
| 16750209 |              |                                                                               | 0.1722 | 0.0361 |
| 16750317 |              |                                                                               | 0.8212 | 0.0066 |
| 16750413 |              |                                                                               | 0.3826 | 0.0038 |
| 16750429 | MIR4698      | microRNA 4698                                                                 | 0.2122 | 0.0311 |
| 16750431 |              |                                                                               | 0.6877 | 0.0426 |
| 16750523 | PFKM         | phosphofructokinase, muscle                                                   | 0.315  | 0.0053 |
| 16750628 |              |                                                                               | 0.1378 | 0.0344 |
| 16751080 |              |                                                                               | 0.3288 | 0.0162 |
| 16751180 | TMPRSS12     | transmembrane (C-terminal) protease, serine 12                                | 0.1082 | 0.0429 |
| 16751202 | HIGD1C       | HIG1 hypoxia inducible domain family, member 1C                               | 0.2086 | 0.0358 |
| 16751354 | LOC728503    | uncharacterized LOC728503                                                     | 0.1904 | 0.0135 |
| 16751518 | KRT86        | keratin 86                                                                    | 0.2054 | 0.0313 |
| 16751973 | LOC400043    | uncharacterized LOC400043                                                     | 0.6353 | 0.0249 |
| 16752021 | COPZ1        | coatamer protein complex, subunit zeta 1                                      | 0.2802 | 0.0104 |
| 16752026 |              |                                                                               | 0.5106 | 0.0305 |
| 16752154 | OR10A7       | olfactory receptor, family 10, subfamily A, member 7                          | 0.1795 | 0.0191 |
| 16752172 | OR6C76       | olfactory receptor, family 6, subfamily C, member 76                          | 0.1724 | 0.0109 |
| 16752190 | RDH5         | retinol dehydrogenase 5 (11-cis/9-cis)                                        | 0.209  | 0.0173 |
| 16752322 | RAB5B        | RAB5B, member RAS oncogene family                                             | 0.2278 | 0.0147 |
| 16752586 | NABP2        | nucleic acid binding protein 2                                                | 0.2247 | 0.043  |
| 16752624 | COQ10A       | coenzyme Q10 homolog A ( <i>S. cerevisiae</i> )                               | 0.6256 | 0.015  |
| 16753243 | LOC100506869 | uncharacterized LOC100506869                                                  | 0.1708 | 0.0207 |
| 16753583 |              |                                                                               | 0.3976 | 0.0041 |
| 16753689 | HELB         | helicase (DNA) B                                                              | 0.3284 | 0.0262 |
| 16753710 |              |                                                                               | 0.2541 | 0.0212 |
| 16753890 |              |                                                                               | 0.1429 | 0.0096 |
| 16754177 | TMEM19       | transmembrane protein 19                                                      | 0.2766 | 0.0375 |
| 16754316 |              |                                                                               | 0.1971 | 0.0204 |
| 16754450 |              |                                                                               | 0.1847 | 0.0113 |
| 16754459 |              |                                                                               | 0.3751 | 0.0164 |
| 16754463 |              |                                                                               | 0.2274 | 0.0328 |
| 16754467 |              |                                                                               | 0.1969 | 0.021  |

|          |           |                                                             |        |        |
|----------|-----------|-------------------------------------------------------------|--------|--------|
| 16754779 |           |                                                             | 0.1389 | 0.0244 |
| 16754846 | LRR1Q1    | leucine-rich repeats and IQ motif containing 1              | 0.3375 | 0.0067 |
| 16754970 |           |                                                             | 0.1947 | 0.005  |
| 16755101 |           |                                                             | 0.2743 | 0.0204 |
| 16755103 | NUDT4     | nudix (nucleoside diphosphate linked moiety X)-type motif 4 | 0.2903 | 0.049  |
| 16755223 | KRT19P2   | keratin 19 pseudogene 2                                     | 0.3934 | 0.0352 |
| 16755265 | MIR331    | microRNA 331                                                | 0.2449 | 0.0184 |
| 16755462 |           |                                                             | 0.1222 | 0.0272 |
| 16755491 |           |                                                             | 0.2546 | 0.0178 |
| 16755493 |           |                                                             | 0.1483 | 0.0499 |
| 16755540 |           |                                                             | 0.2098 | 0.0291 |
| 16755908 | DRAM1     | DNA-damage regulated autophagy modulator 1                  | 0.4891 | 0.0048 |
| 16755958 | ASCL1     | achaete-scute complex homolog 1 (Drosophila)                | 0.2857 | 0.0345 |
| 16756241 | KIAA1033  | KIAA1033                                                    | 0.2484 | 0.0411 |
| 16756286 | C12orf75  | chromosome 12 open reading frame 75                         | 1.4643 | 0      |
| 16756304 |           |                                                             | 0.4148 | 0.0328 |
| 16756310 | TCP11L2   | t-complex 11 (mouse)-like 2                                 | 0.542  | 0.0001 |
| 16756334 | POLR3B    | polymerase (RNA) III (DNA directed) polypeptide B           | 0.3218 | 0.0157 |
| 16756503 | ASCL4     | achaete-scute complex homolog 4 (Drosophila)                | 0.2048 | 0.0044 |
| 16756507 |           |                                                             | 0.157  | 0.0277 |
| 16756547 | ISCU      | iron-sulfur cluster scaffold homolog (E. coli)              | 0.4017 | 0.0462 |
| 16756597 | USP30     | ubiquitin specific peptidase 30                             | 0.3    | 0.0193 |
| 16756757 | UBE3B     | ubiquitin protein ligase E3B                                | 0.3122 | 0.0162 |
| 16756829 | MIR4497   | microRNA 4497                                               | 0.4927 | 0.0004 |
| 16756895 | IFT81     | intraflagellar transport 81 homolog (Chlamydomonas)         | 0.5506 | 0.0036 |
| 16756995 | TCTN1     | tectonic family member 1                                    | 0.5802 | 0      |
| 16757032 |           |                                                             | 0.1349 | 0.0307 |
| 16757160 | ALDH2     | aldehyde dehydrogenase 2 family (mitochondrial)             | 0.5917 | 0.0261 |
| 16757181 | MAPKAPK5  | mitogen-activated protein kinase-activated protein kinase 5 | 0.3508 | 0.0222 |
| 16757248 |           |                                                             | 0.2934 | 0.0141 |
| 16757253 |           |                                                             | 0.1847 | 0.0092 |
| 16757255 | PTPN11    | protein tyrosine phosphatase, non-receptor type 11          | 0.2577 | 0.0427 |
| 16757427 | TPCN1     | two pore segment channel 1                                  | 0.452  | 0.0108 |
| 16757510 |           |                                                             | 0.3255 | 0.0002 |
| 16757586 |           |                                                             | 0.2669 | 0.0009 |
| 16757603 | LINC00173 | long intergenic non-protein coding RNA 173                  | 0.4273 | 0.0204 |
| 16757633 |           |                                                             | 0.2605 | 0.0029 |
| 16757684 |           |                                                             | 0.1679 | 0.01   |
| 16757766 | HSPB8     | heat shock 22kDa protein 8                                  | 0.7068 | 0.0029 |
| 16757902 | DYNLL1    | dynein, light chain, LC8-type 1                             | 0.1948 | 0.0208 |
| 16757969 | MLEC      | malectin                                                    | 0.5649 | 0.0001 |
| 16758005 |           |                                                             | 0.1555 | 0.0337 |
| 16758052 | P2RX7     | purinergic receptor P2X, ligand-gated ion channel, 7        | 0.5841 | 0.0069 |
| 16758163 | SETD1B    | SET domain containing 1B                                    | 0.3696 | 0.0009 |
| 16758536 | ARL6IP4   | ADP-ribosylation-like factor 6 interacting protein 4        | 0.2101 | 0.007  |
| 16758549 | ARL6IP4   | ADP-ribosylation-like factor 6 interacting protein 4        | 0.3223 | 0.0008 |
| 16758612 | TMED2     | transmembrane emp24 domain trafficking protein 2            | 0.2002 | 0.0258 |
| 16758618 |           |                                                             | 0.2601 | 0.0066 |
| 16758619 |           |                                                             | 0.269  | 0.005  |
| 16758671 | TCTN2     | tectonic family member 2                                    | 0.6099 | 0.0005 |
| 16758817 | ZNF664    | zinc finger protein 664                                     | 0.2509 | 0.0281 |
| 16758879 | BRI3BP    | BRI3 binding protein                                        | 0.3094 | 0.0275 |
| 16759081 |           |                                                             | 0.123  | 0.0444 |
| 16759619 |           |                                                             | 0.465  | 0.0039 |
| 16759652 | ZNF140    | zinc finger protein 140                                     | 0.4136 | 0.0482 |
| 16759855 | NINJ2     | ninjurin 2                                                  | 0.1301 | 0.0409 |
| 16760139 |           |                                                             | 0.1621 | 0.0493 |
| 16760329 | TNFRSF1A  | tumor necrosis factor receptor superfamily, member 1A       | 0.2819 | 0.0144 |
| 16760380 | CD27-AS1  | CD27 antisense RNA 1 (non-protein coding)                   | 0.2207 | 0.0138 |

|          |              |                                                                                                   |        |        |
|----------|--------------|---------------------------------------------------------------------------------------------------|--------|--------|
| 16760393 | VAMP1        | vesicle-associated membrane protein 1 (synaptobrevin 1)                                           | 0.2228 | 0.0445 |
| 16760406 | MRPL51       | mitochondrial ribosomal protein L51                                                               | 0.2016 | 0.0227 |
| 16760516 | LPAR5        | lysophosphatidic acid receptor 5                                                                  | 0.5075 | 0.0205 |
| 16760523 | ACRBP        | acrosin binding protein                                                                           | 0.1838 | 0.0161 |
| 16760546 | ING4         | inhibitor of growth family, member 4                                                              | 0.3192 | 0.003  |
| 16760896 | FAM90A1      | family with sequence similarity 90, member A1                                                     | 0.4841 | 0.0263 |
| 16761130 |              |                                                                                                   | 0.1855 | 0.005  |
| 16761139 | LOC100509445 | uncharacterized LOC100509445                                                                      | 0.2462 | 0.027  |
| 16761176 | KLRB1        | killer cell lectin-like receptor subfamily B, member 1                                            | 0.4489 | 0.006  |
| 16761193 | CLECL1       | C-type lectin-like 1                                                                              | 0.2887 | 0.0021 |
| 16761201 | CD69         | CD69 molecule                                                                                     | 0.5    | 0.0002 |
| 16761269 | CLEC7A       | C-type lectin domain family 7, member A                                                           | 0.5186 | 0.0094 |
| 16761663 | HEBP1        | heme binding protein 1                                                                            | 0.5252 | 0.0028 |
| 16761877 | EPS8         | epidermal growth factor receptor pathway substrate 8                                              | 0.5147 | 0.0208 |
| 16762037 |              |                                                                                                   | 0.1363 | 0.0252 |
| 16762234 |              |                                                                                                   | 0.1247 | 0.0238 |
| 16762370 | CASC1        | cancer susceptibility candidate 1                                                                 | 0.7431 | 0.0007 |
| 16762440 |              |                                                                                                   | 0.2559 | 0.0108 |
| 16762634 | ARNTL2       | aryl hydrocarbon receptor nuclear translocator-like 2                                             | 0.1577 | 0.0244 |
| 16762686 |              |                                                                                                   | 0.1644 | 0.0405 |
| 16762689 |              |                                                                                                   | 0.1955 | 0.0065 |
| 16762871 |              |                                                                                                   | 0.1934 | 0.0103 |
| 16763060 | SYT10        | synaptotagmin X                                                                                   | 0.1955 | 0.0438 |
| 16763099 |              |                                                                                                   | 0.1185 | 0.0473 |
| 16763280 | ZCRB1        | zinc finger CCHC-type and RNA binding motif 1                                                     | 0.4671 | 0.0007 |
| 16763295 | PRICKLE1     | prickle homolog 1 (Drosophila)                                                                    | 0.2332 | 0.0391 |
| 16763373 |              |                                                                                                   | 0.6251 | 0.0017 |
| 16763375 | PUS7L        | pseudouridylate synthase 7 homolog (S. cerevisiae)-like                                           | 0.5624 | 0.0042 |
| 16763456 |              |                                                                                                   | 0.3309 | 0.0032 |
| 16763458 | DBX2         | developing brain homeobox 2                                                                       | 0.1467 | 0.0104 |
| 16763882 | ASB8         | ankyrin repeat and SOCS box containing 8                                                          | 0.2622 | 0.0431 |
| 16764068 | ARF3         | ADP-ribosylation factor 3                                                                         | 0.1964 | 0.0284 |
| 16764071 |              |                                                                                                   | 0.2947 | 0.042  |
| 16764080 |              |                                                                                                   | 0.3851 | 0.0313 |
| 16764089 |              |                                                                                                   | 0.2732 | 0.0352 |
| 16764110 |              |                                                                                                   | 0.6994 | 0.0288 |
| 16764111 |              |                                                                                                   | 0.6994 | 0.0288 |
| 16764131 | PRKAG1       | protein kinase, AMP-activated, gamma 1 non-catalytic subunit                                      | 0.1829 | 0.0415 |
| 16764331 |              |                                                                                                   | 0.1637 | 0.0254 |
| 16764398 | FMNL3        | formin-like 3                                                                                     | 0.3721 | 0.0262 |
| 16764564 | LIMA1        | LIM domain and actin binding 1                                                                    | 0.4789 | 0.0156 |
| 16764620 | SLC11A2      | solute carrier family 11 (proton-coupled divalent metal ion transporters), member 2               | 0.3707 | 0.0161 |
| 16764732 | BIN2         | bridging integrator 2                                                                             | 0.2123 | 0.0418 |
| 16764791 | KRT80        | keratin 80                                                                                        | 1.1993 | 0.003  |
| 16764805 | LOC283403    | uncharacterized LOC283403                                                                         | 0.1782 | 0.0034 |
| 16764989 | KRT72        | keratin 72                                                                                        | 0.2266 | 0.0355 |
| 16765404 | CALCOCO1     | calcium binding and coiled-coil domain 1                                                          | 0.2391 | 0.0378 |
| 16765476 | LOC100240735 | uncharacterized LOC100240735                                                                      | 0.937  | 0.0008 |
| 16765491 | SMUG1        | single-strand-selective monofunctional uracil-DNA glycosylase 1                                   | 0.1983 | 0.0442 |
| 16765622 |              |                                                                                                   | 0.5317 | 0.0072 |
| 16765900 | SMARCC2      | SWI/SNF related, matrix associated, actin dependent regulator of chromatin, subfamily c, member 2 | 0.2555 | 0.0328 |
| 16765998 |              |                                                                                                   | 0.2967 | 0.0432 |
| 16766334 | SDR9C7       | short chain dehydrogenase/reductase family 9C, member 7                                           | 0.1909 | 0.0005 |
| 16766420 | STAT6        | signal transducer and activator of transcription 6, interleukin-4 induced                         | 0.4128 | 0.017  |
| 16766789 |              |                                                                                                   | 0.2519 | 0.0027 |

|          |              |                                                                                         |        |        |
|----------|--------------|-----------------------------------------------------------------------------------------|--------|--------|
| 16766870 |              |                                                                                         | 0.1698 | 0.0142 |
| 16767081 | WIF1         | WNT inhibitory factor 1                                                                 | 1.1015 | 0.0426 |
| 16767142 | TMBIM4       | transmembrane BAX inhibitor motif containing 4                                          | 0.272  | 0.0132 |
| 16767170 | GRIP1        | glutamate receptor interacting protein 1                                                | 0.8109 | 0.0003 |
| 16767208 |              |                                                                                         | 0.6129 | 0.0095 |
| 16767213 |              |                                                                                         | 0.1371 | 0.035  |
| 16767225 |              |                                                                                         | 0.1078 | 0.04   |
| 16767306 |              |                                                                                         | 0.1626 | 0.0107 |
| 16767373 | BEST3        | bestrophin 3                                                                            | 0.1689 | 0.0471 |
| 16767497 |              |                                                                                         | 0.1572 | 0.0097 |
| 16767621 |              |                                                                                         | 0.1308 | 0.0164 |
| 16767642 | LOC100507377 | uncharacterized LOC100507377                                                            | 0.2471 | 0.0492 |
| 16767886 |              |                                                                                         | 0.2247 | 0.0002 |
| 16767896 |              |                                                                                         | 0.1033 | 0.032  |
| 16767901 |              |                                                                                         | 0.2377 | 0.0148 |
| 16767911 | PAWR         | PRKC, apoptosis, WT1, regulator                                                         | 0.3607 | 0.0485 |
| 16768088 |              |                                                                                         | 0.1088 | 0.038  |
| 16768094 |              |                                                                                         | 0.2678 | 0.0015 |
| 16768097 |              |                                                                                         | 0.1842 | 0.0125 |
| 16768287 | LOC728084    | uncharacterized LOC728084                                                               | 0.1748 | 0.0195 |
| 16768526 |              |                                                                                         | 0.2053 | 0.0406 |
| 16768710 |              |                                                                                         | 0.208  | 0.0286 |
| 16768890 |              |                                                                                         | 0.173  | 0.022  |
| 16768896 |              |                                                                                         | 0.2047 | 0.0034 |
| 16769110 | ARL1         | ADP-ribosylation factor-like 1                                                          | 0.2945 | 0.0229 |
| 16769159 | GNPTAB       | N-acetylglucosamine-1-phosphate transferase, alpha and beta subunits                    | 1.0555 | 0      |
| 16769198 |              |                                                                                         | 0.3669 | 0.0022 |
| 16769250 | IGF1         | insulin-like growth factor 1 (somatomedin C)                                            | 1.0505 | 0.0053 |
| 16769264 | LINC00485    | long intergenic non-protein coding RNA 485                                              | 0.4398 | 0.0358 |
| 16769270 | PAH          | phenylalanine hydroxylase                                                               | 0.8538 | 0.0398 |
| 16769311 |              |                                                                                         | 0.1456 | 0.0105 |
| 16769347 |              |                                                                                         | 0.1633 | 0.0344 |
| 16769362 | NT5DC3       | 5'-nucleotidase domain containing 3                                                     | 0.4607 | 0.0472 |
| 16769514 | APPL2        | adaptor protein, phosphotyrosine interaction, PH domain and leucine zipper containing 2 | 0.629  | 0.0002 |
| 16769561 |              |                                                                                         | 0.2153 | 0.0238 |
| 16769569 | NUAK1        | NUAK family, SNF1-like kinase, 1                                                        | 0.5663 | 0.0212 |
| 16769585 | CKAP4        | cytoskeleton-associated protein 4                                                       | 0.2106 | 0.0384 |
| 16769646 |              |                                                                                         | 0.4285 | 0.0008 |
| 16769649 | PRDM4        | PR domain containing 4                                                                  | 0.426  | 0.0073 |
| 16769770 | SELPLG       | selectin P ligand                                                                       | 0.4023 | 0.0384 |
| 16769840 | SVOP         | SV2 related protein homolog (rat)                                                       | 0.1741 | 0.0132 |
| 16769865 | USP30-AS1    | USP30 antisense RNA 1 (non-protein coding)                                              | 0.4663 | 0.0004 |
| 16770189 | FAM109A      | family with sequence similarity 109, member A                                           | 0.3009 | 0.0009 |
| 16770281 | TMEM116      | transmembrane protein 116                                                               | 0.3276 | 0.0094 |
| 16770627 | RBM19        | RNA binding motif protein 19                                                            | 0.3745 | 0.0156 |
| 16771004 |              |                                                                                         | 0.1382 | 0.0354 |
| 16771045 |              |                                                                                         | 0.5196 | 0.0042 |
| 16771065 |              |                                                                                         | 0.2319 | 0.0302 |
| 16771242 | PXN          | paxillin                                                                                | 0.6523 | 0.007  |
| 16771339 |              |                                                                                         | 0.1815 | 0.0328 |
| 16771356 |              |                                                                                         | 0.5323 | 0.0005 |
| 16771364 |              |                                                                                         | 0.1286 | 0.0469 |
| 16771464 |              |                                                                                         | 0.4084 | 0.047  |
| 16771465 |              |                                                                                         | 0.3875 | 0.0237 |
| 16771476 |              |                                                                                         | 0.3561 | 0.0318 |
| 16771502 |              |                                                                                         | 0.3503 | 0.0462 |
| 16771525 |              |                                                                                         | 0.4053 | 0.0476 |
| 16771532 |              |                                                                                         | 1.0525 | 0.0036 |
| 16771652 | VPS33A       | vacuolar protein sorting 33 homolog A (S. cerevisiae)                                   | 0.3381 | 0.0258 |

|          |           |                                                                                |        |        |
|----------|-----------|--------------------------------------------------------------------------------|--------|--------|
| 16771998 | RILPL2    | Rab interacting lysosomal protein-like 2                                       | 0.3026 | 0.0245 |
| 16772039 |           |                                                                                | 0.7189 | 0.0033 |
| 16772042 | CCDC92    | coiled-coil domain containing 92                                               | 0.2327 | 0.0121 |
| 16772071 |           |                                                                                | 0.3269 | 0.0005 |
| 16772234 |           |                                                                                | 0.5574 | 0.003  |
| 16772271 |           |                                                                                | 0.1885 | 0.0142 |
| 16772322 |           |                                                                                | 0.2079 | 0.0077 |
| 16772552 |           |                                                                                | 0.2759 | 0.0007 |
| 16772555 |           |                                                                                | 0.1385 | 0.0435 |
| 16772808 |           |                                                                                | 0.4223 | 0.0033 |
| 16772864 | RNU6-76   | RNA, U6 small nuclear 76                                                       | 0.2524 | 0.032  |
| 16773041 |           |                                                                                | 0.1078 | 0.0409 |
| 16773073 |           |                                                                                | 0.1945 | 0.0009 |
| 16773157 |           |                                                                                | 0.1474 | 0.0455 |
| 16773163 |           |                                                                                | 0.1414 | 0.0299 |
| 16773260 | ATP12A    | ATPase, H+/K+ transporting, nongastric, alpha polypeptide                      | 0.2217 | 0.0003 |
| 16773756 |           |                                                                                | 0.2167 | 0.0395 |
| 16773939 |           |                                                                                | 0.2214 | 0.0035 |
| 16774384 | TNFSF11   | tumor necrosis factor (ligand) superfamily, member 11                          | 0.1367 | 0.0297 |
| 16774612 | RN7SKP5   | RNA, 7SK small nuclear pseudogene 5                                            | 0.2242 | 0.015  |
| 16774614 | RNU6-68   | RNA, U6 small nuclear 68                                                       | 0.236  | 0.0011 |
| 16774616 |           |                                                                                | 0.2129 | 0.01   |
| 16774655 | HTR2A-AS1 | HTR2A antisense RNA 1 (non-protein coding)                                     | 0.1436 | 0.0219 |
| 16774679 | ITM2B     | integral membrane protein 2B                                                   | 0.3189 | 0.0453 |
| 16774724 | CYSLTR2   | cysteinyl leukotriene receptor 2                                               | 3.0514 | 0      |
| 16775030 | TPTE2P3   | transmembrane phosphoinositide 3-phosphatase and tensin homolog 2 pseudogene 3 | 0.1851 | 0.0334 |
| 16775096 |           |                                                                                | 0.105  | 0.0427 |
| 16775109 |           |                                                                                | 0.1407 | 0.0049 |
| 16775201 |           |                                                                                | 0.1229 | 0.0451 |
| 16775206 |           |                                                                                | 0.1375 | 0.0343 |
| 16775223 |           |                                                                                | 0.1911 | 0.0143 |
| 16775260 |           |                                                                                | 0.4493 | 0.0018 |
| 16775301 | ATXN8OS   | ATXN8 opposite strand (non-protein coding)                                     | 0.1312 | 0.0163 |
| 16775520 | CLN5      | ceroid-lipofuscinosis, neuronal 5                                              | 0.3709 | 0.0465 |
| 16775665 |           |                                                                                | 0.1133 | 0.0104 |
| 16775668 |           |                                                                                | 0.1473 | 0.0282 |
| 16775676 |           |                                                                                | 0.1176 | 0.0312 |
| 16775871 | HS6ST3    | heparan sulfate 6-O-sulfotransferase 3                                         | 1.3395 | 0.0125 |
| 16775879 |           |                                                                                | 0.2375 | 0.0274 |
| 16776080 | CLYBL     | citrate lyase beta like                                                        | 0.4049 | 0.0403 |
| 16776583 | TEX29     | testis expressed 29                                                            | 0.3083 | 0.0023 |
| 16777112 |           |                                                                                | 0.201  | 0.0185 |
| 16777252 |           |                                                                                | 0.1627 | 0.0155 |
| 16777756 | SLC46A3   | solute carrier family 46, member 3                                             | 1.1326 | 0.0048 |
| 16777773 | MTUS2-AS1 | MTUS2 antisense RNA 1 (non-protein coding)                                     | 0.2443 | 0.0084 |
| 16777896 | HSPH1     | heat shock 105kDa/110kDa protein 1                                             | 0.3874 | 0.0468 |
| 16778000 |           |                                                                                | 0.1619 | 0.0188 |
| 16778053 | LINC00457 | long intergenic non-protein coding RNA 457                                     | 0.1393 | 0.0153 |
| 16778096 |           |                                                                                | 0.1599 | 0.0334 |
| 16778235 | RN7SKP1   | RNA, 7SK small nuclear pseudogene 1                                            | 0.1953 | 0.0003 |
| 16778553 |           |                                                                                | 0.1262 | 0.0401 |
| 16778559 | EPSTI1    | epithelial stromal interaction 1 (breast)                                      | 0.3668 | 0.0429 |
| 16778644 |           |                                                                                | 0.1286 | 0.0472 |
| 16778681 |           |                                                                                | 0.1255 | 0.0339 |
| 16778745 | SLC25A30  | solute carrier family 25, member 30                                            | 0.5767 | 0.0223 |
| 16778849 | LCP1      | lymphocyte cytosolic protein 1 (L-plastin)                                     | 0.4198 | 0.0144 |
| 16778879 |           |                                                                                | 0.2094 | 0.0421 |
| 16778938 | HTR2A     | 5-hydroxytryptamine (serotonin) receptor 2A, G protein-coupled                 | 0.6097 | 0.0451 |

|          |             |                                                                      |        |        |
|----------|-------------|----------------------------------------------------------------------|--------|--------|
| 16779104 |             |                                                                      | 0.1792 | 0.0377 |
| 16779184 | DLEU7       | deleted in lymphocytic leukemia, 7                                   | 0.2043 | 0.0039 |
| 16779466 |             |                                                                      | 0.199  | 0.023  |
| 16779584 |             |                                                                      | 0.1515 | 0.0439 |
| 16779587 |             |                                                                      | 0.1809 | 0.0235 |
| 16779634 |             |                                                                      | 0.2102 | 0.0391 |
| 16779637 |             |                                                                      | 0.1648 | 0.0481 |
| 16779839 | KCTD12      | potassium channel tetramerisation domain containing 12               | 0.5926 | 0.0156 |
| 16780092 | SLITRK1     | SLIT and NTRK-like family, member 1                                  | 0.1895 | 0.0091 |
| 16780126 | RNU6-72     | RNA, U6 small nuclear 72                                             | 0.225  | 0.0098 |
| 16780229 |             |                                                                      | 0.2186 | 0.0113 |
| 16780604 |             |                                                                      | 0.205  | 0.0215 |
| 16780699 | NALCN       | sodium leak channel, non-selective                                   | 0.7626 | 0.0226 |
| 16781092 | ARHGEF7-AS1 | ARHGEF7 antisense RNA 1 (non-protein coding)                         | 0.1798 | 0.0334 |
| 16781268 | ATP4B       | ATPase, H+/K+ exchanging, beta polypeptide                           | 0.1748 | 0.013  |
| 16781285 | GAS6        | growth arrest-specific 6                                             | 0.2549 | 0.0255 |
| 16781315 | RASA3       | RAS p21 protein activator 3                                          | 0.2605 | 0.0487 |
| 16781345 |             |                                                                      | 0.1486 | 0.0295 |
| 16781431 | OR4N2       | olfactory receptor, family 4, subfamily N, member 2                  | 0.1844 | 0.0205 |
| 16781448 | OR4K5       | olfactory receptor, family 4, subfamily K, member 5                  | 0.1761 | 0.0299 |
| 16781464 | OR4K17      | olfactory receptor, family 4, subfamily K, member 17                 | 0.1435 | 0.045  |
| 16781591 | RNASE6      | ribonuclease, RNase A family, k6                                     | 0.5437 | 0.0423 |
| 16781834 | TRAV4       | T cell receptor alpha variable 4                                     | 0.2007 | 0.0163 |
| 16781856 | TRAV10      | T cell receptor alpha variable 10                                    | 0.2297 | 0.0036 |
| 16781893 | TRAV12-3    | T cell receptor alpha variable 12-3                                  | 0.3149 | 0.0175 |
| 16781934 | TRAV24      | T cell receptor alpha variable 24                                    | 0.1296 | 0.0411 |
| 16781937 | TRAV25      | T cell receptor alpha variable 25                                    | 0.1601 | 0.0065 |
| 16781954 | TRAV29DV5   | T cell receptor alpha variable 29/delta variable 5 (gene/pseudogene) | 0.2971 | 0.0009 |
| 16782003 | TRDC        | T cell receptor delta constant                                       | 0.5595 | 0.0044 |
| 16782008 | TRAJ61      | T cell receptor alpha joining 61 (non-functional)                    | 0.188  | 0.0206 |
| 16782018 | TRAJ54      | T cell receptor alpha joining 54                                     | 0.2042 | 0.038  |
| 16782020 | TRAJ53      | T cell receptor alpha joining 53                                     | 0.2153 | 0.0006 |
| 16782022 | TRAJ52      | T cell receptor alpha joining 52                                     | 0.135  | 0.0487 |
| 16782028 | TRAJ48      | T cell receptor alpha joining 48                                     | 0.2608 | 0.007  |
| 16782032 | TRAJ46      | T cell receptor alpha joining 46                                     | 0.3205 | 0.0423 |
| 16782034 | TRAJ45      | T cell receptor alpha joining 45                                     | 0.261  | 0.0085 |
| 16782060 | TRAJ32      | T cell receptor alpha joining 32                                     | 0.3206 | 0.0051 |
| 16782072 | TRAJ26      | T cell receptor alpha joining 26                                     | 0.1565 | 0.0446 |
| 16782078 | TRAJ23      | T cell receptor alpha joining 23                                     | 0.3017 | 0.0198 |
| 16782084 | TRAJ20      | T cell receptor alpha joining 20                                     | 0.2544 | 0.0176 |
| 16782094 | TRAJ14      | T cell receptor alpha joining 14                                     | 0.2618 | 0.0101 |
| 16782096 | TRAJ13      | T cell receptor alpha joining 13                                     | 0.1941 | 0.0082 |
| 16782098 | TRAJ12      | T cell receptor alpha joining 12                                     | 0.1608 | 0.0124 |
| 16782102 | TRAJ10      | T cell receptor alpha joining 10                                     | 0.2379 | 0.0164 |
| 16782106 | TRAJ8       | T cell receptor alpha joining 8                                      | 0.2099 | 0.0175 |
| 16782122 | TRAJ17      | T cell receptor alpha joining 17                                     | 0.9325 | 0.0025 |
| 16782901 |             |                                                                      | 0.1248 | 0.0403 |
| 16782939 |             |                                                                      | 0.3416 | 0.0382 |
| 16782949 |             |                                                                      | 0.41   | 0.0242 |
| 16782980 | C14orf23    | chromosome 14 open reading frame 23                                  | 0.1586 | 0.0051 |
| 16783265 | NPAS3       | neuronal PAS domain protein 3                                        | 0.3009 | 0.0415 |
| 16783467 | NKX2-1-AS1  | NKX2-1 antisense RNA 1 (non-protein coding)                          | 0.2028 | 0.0176 |
| 16783755 |             |                                                                      | 0.2025 | 0.0167 |
| 16784064 |             |                                                                      | 0.2671 | 0.0065 |
| 16784201 | PTGDR       | prostaglandin D2 receptor (DP)                                       | 0.5702 | 0.0002 |
| 16784365 |             |                                                                      | 0.3853 | 0.0155 |
| 16784556 |             |                                                                      | 0.1334 | 0.0405 |
| 16784780 |             |                                                                      | 0.2316 | 0.0056 |
| 16785379 | HSPA2       | heat shock 70kDa protein 2                                           | 0.794  | 0.0037 |

|          |              |                                                                              |        |        |
|----------|--------------|------------------------------------------------------------------------------|--------|--------|
| 16786064 | RGS6         | regulator of G-protein signaling 6                                           | 0.1918 | 0.0096 |
| 16787049 |              |                                                                              | 0.563  | 0.0139 |
| 16787118 | RNU3P3       | RNA, U3 small nucleolar pseudogene 3                                         | 0.2064 | 0.0125 |
| 16787208 | GPR65        | G protein-coupled receptor 65                                                | 0.4728 | 0.0218 |
| 16787231 |              |                                                                              | 0.1656 | 0.043  |
| 16787528 | RNU7-30P     | RNA, U7 small nuclear 30 pseudogene                                          | 0.1815 | 0.0132 |
| 16787597 | RIN3         | Ras and Rab interactor 3                                                     | 0.5328 | 0.006  |
| 16788296 | EML1         | echinoderm microtubule associated protein like 1                             | 0.4481 | 0.0392 |
| 16789174 | LOC441698    | ras-related protein Rap-2c-like                                              | 0.243  | 0.0383 |
| 16789569 |              |                                                                              | 0.2099 | 0.0082 |
| 16789573 | PLD4         | phospholipase D family, member 4                                             | 0.2728 | 0.0306 |
| 16790460 |              |                                                                              | 0.1405 | 0.022  |
| 16790527 |              |                                                                              | 0.2553 | 0.0257 |
| 16791371 | RIPK3        | receptor-interacting serine-threonine kinase 3                               | 0.1986 | 0.0032 |
| 16791436 | GZMH         | granzyme H (cathepsin G-like 2, protein h-CCPX)                              | 0.4184 | 0.0001 |
| 16791444 | GZMB         | granzyme B (granzyme 2, cytotoxic T-lymphocyte-associated serine esterase 1) | 0.268  | 0.0045 |
| 16791793 | GPR33        | G protein-coupled receptor 33 (gene/pseudogene)                              | 0.2139 | 0.0006 |
| 16791800 |              |                                                                              | 0.1682 | 0.0157 |
| 16792079 |              |                                                                              | 0.1188 | 0.0377 |
| 16792096 |              |                                                                              | 0.1959 | 0.0389 |
| 16792144 | NKX2-8       | NK2 homeobox 8                                                               | 0.187  | 0.0206 |
| 16792287 | FBXO33       | F-box protein 33                                                             | 0.341  | 0.0084 |
| 16792305 |              |                                                                              | 0.1228 | 0.0337 |
| 16792888 |              |                                                                              | 0.1297 | 0.0215 |
| 16792894 | TRIM9        | tripartite motif containing 9                                                | 0.774  | 0.0005 |
| 16792927 |              |                                                                              | 0.1815 | 0.0084 |
| 16793421 |              |                                                                              | 0.4647 | 0.0294 |
| 16793822 |              |                                                                              | 0.1301 | 0.0499 |
| 16793936 |              |                                                                              | 0.1851 | 0.0411 |
| 16794276 |              |                                                                              | 0.2688 | 0.0268 |
| 16794401 |              |                                                                              | 0.2409 | 0.022  |
| 16794403 |              |                                                                              | 0.1404 | 0.0338 |
| 16795268 |              |                                                                              | 0.2968 | 0.0001 |
| 16795276 |              |                                                                              | 0.1859 | 0.0157 |
| 16795463 |              |                                                                              | 0.1173 | 0.0308 |
| 16795908 | CATSPERB     | catsper channel auxiliary subunit beta                                       | 0.1396 | 0.0321 |
| 16796015 |              |                                                                              | 0.2265 | 0.028  |
| 16796319 |              |                                                                              | 0.1428 | 0.0487 |
| 16796475 | LOC100130815 | uncharacterized LOC100130815                                                 | 0.1366 | 0.0351 |
| 16796604 |              |                                                                              | 0.2017 | 0.0281 |
| 16796727 | BEGAIN       | brain-enriched guanylate kinase-associated homolog (rat)                     | 0.2079 | 0.0441 |
| 16797121 | MIR3545      | microRNA 3545                                                                | 0.1587 | 0.0037 |
| 16797196 | AHNAK2       | AHNAK nucleoprotein 2                                                        | 0.438  | 0.0034 |
| 16797389 | IGHG3        | immunoglobulin heavy constant gamma 3 (G3m marker)                           | 0.5118 | 0.0402 |
| 16797440 | ADAM6        | ADAM metallopeptidase domain 6 (pseudogene)                                  | 0.4861 | 0.0102 |
| 16797451 |              |                                                                              | 0.2713 | 0.0017 |
| 16797483 | IGHV3-16     | immunoglobulin heavy variable 3-16 (non-functional)                          | 0.1706 | 0.036  |
| 16797545 | IGHG1        | immunoglobulin heavy constant gamma 1 (G1m marker)                           | 0.2029 | 0.0163 |
| 16797555 | IGHM         | immunoglobulin heavy constant mu                                             | 0.341  | 0.0114 |
| 16797725 | OR4N4        | olfactory receptor, family 4, subfamily N, member 4                          | 0.1344 | 0.0074 |
| 16797968 |              |                                                                              | 0.1927 | 0.0492 |
| 16798343 | SNORD115-21  | small nucleolar RNA, C/D box 115-21                                          | 0.1096 | 0.048  |
| 16798404 | SNORD115-30  | small nucleolar RNA, C/D box 115-30                                          | 0.1329 | 0.0361 |
| 16798426 | SNORD115-41  | small nucleolar RNA, C/D box 115-41                                          | 0.2299 | 0.0031 |
| 16798479 | GABRA5       | gamma-aminobutyric acid (GABA) A receptor, alpha 5                           | 0.2048 | 0.0417 |
| 16799109 |              |                                                                              | 0.3475 | 0.0416 |
| 16799167 |              |                                                                              | 0.1247 | 0.0314 |

|          |              |                                                                    |        |        |
|----------|--------------|--------------------------------------------------------------------|--------|--------|
| 16799273 | C15orf53     | chromosome 15 open reading frame 53                                | 0.2072 | 0.0066 |
| 16799289 | C15orf54     | chromosome 15 open reading frame 54                                | 0.3404 | 0.0171 |
| 16799514 |              |                                                                    | 0.158  | 0.033  |
| 16800117 | STARD9       | StAR-related lipid transfer (START) domain containing 9            | 0.1786 | 0.0106 |
| 16800229 | MAP1A        | microtubule-associated protein 1A                                  | 0.9052 | 0.0006 |
| 16800242 | CKMT1B       | creatine kinase, mitochondrial 1B                                  | 0.8413 | 0.0065 |
| 16800692 |              |                                                                    | 0.3153 | 0.0028 |
| 16800753 |              |                                                                    | 0.2633 | 0.0227 |
| 16800962 | SLC27A2      | solute carrier family 27 (fatty acid transporter), member 2        | 1.8933 | 0.0008 |
| 16800978 |              |                                                                    | 0.1876 | 0.0068 |
| 16801108 | SCG3         | secretogranin III                                                  | 0.9445 | 0.0481 |
| 16801239 |              |                                                                    | 0.1834 | 0.0027 |
| 16801695 | C2CD4A       | C2 calcium-dependent domain containing 4A                          | 0.2435 | 0.0318 |
| 16801925 | FBXL22       | F-box and leucine-rich repeat protein 22                           | 0.1763 | 0.0425 |
| 16802247 |              |                                                                    | 0.2525 | 0.0183 |
| 16802698 |              |                                                                    | 0.1429 | 0.0305 |
| 16802700 |              |                                                                    | 0.4687 | 0.0029 |
| 16802900 |              |                                                                    | 0.8099 | 0.0271 |
| 16803370 | TSPAN3       | tetraspanin 3                                                      | 0.1614 | 0.041  |
| 16803399 |              |                                                                    | 0.1612 | 0.0467 |
| 16803417 |              |                                                                    | 0.4589 | 0.014  |
| 16803577 | LOC646938    | TBC1 domain family, member 2B pseudogene                           | 0.2027 | 0.0096 |
| 16803807 | IL16         | interleukin 16                                                     | 0.2153 | 0.0048 |
| 16804234 |              |                                                                    | 0.1713 | 0.0337 |
| 16804707 | MIR3174      | microRNA 3174                                                      | 0.2537 | 0.0439 |
| 16805124 | SV2B         | synaptic vesicle glycoprotein 2B                                   | 1.0337 | 0.0367 |
| 16805151 |              |                                                                    | 0.1815 | 0.041  |
| 16805324 |              |                                                                    | 0.1495 | 0.0417 |
| 16805486 |              |                                                                    | 0.2001 | 0.0285 |
| 16805590 |              |                                                                    | 0.2018 | 0.0057 |
| 16805797 | OR4F15       | olfactory receptor, family 4, subfamily F, member 15               | 0.1542 | 0.048  |
| 16805804 | FAM138E      | family with sequence similarity 138, member E                      | 0.2201 | 0.0041 |
| 16805825 |              |                                                                    | 0.3741 | 0.0034 |
| 16805870 | NBEAP1       | neurobeachin pseudogene 1                                          | 0.2156 | 0.0485 |
| 16805896 |              |                                                                    | 0.5146 | 0.0105 |
| 16805924 |              |                                                                    | 0.4255 | 0.006  |
| 16807233 |              |                                                                    | 0.2437 | 0.0222 |
| 16807257 |              |                                                                    | 0.1843 | 0.037  |
| 16807263 |              |                                                                    | 0.1406 | 0.0206 |
| 16807271 | FSIP1        | fibrous sheath interacting protein 1                               | 0.1492 | 0.0475 |
| 16807420 |              |                                                                    | 0.2213 | 0.0303 |
| 16807761 | MIR4310      | microRNA 4310                                                      | 0.463  | 0.0029 |
| 16808063 |              |                                                                    | 0.1117 | 0.0402 |
| 16808336 | PPIP5K1      | diphosphoinositol pentakisphosphate kinase 1                       | 0.3743 | 0.0382 |
| 16808550 | LOC100652936 | uncharacterized LOC100652936                                       | 0.554  | 0.0405 |
| 16808665 | GATM         | glycine amidinotransferase (L-arginine:glycine amidinotransferase) | 1.0754 | 0.0013 |
| 16808708 |              |                                                                    | 0.1646 | 0.0446 |
| 16809027 | ATP8B4       | ATPase, class I, type 8B, member 4                                 | 0.5144 | 0.0063 |
| 16809219 | TNFAIP8L3    | tumor necrosis factor, alpha-induced protein 8-like 3              | 0.2731 | 0.0088 |
| 16809319 |              |                                                                    | 0.2444 | 0.0064 |
| 16809322 |              |                                                                    | 0.1564 | 0.0277 |
| 16810011 | MIR2116      | microRNA 2116                                                      | 0.1809 | 0.0455 |
| 16810165 |              |                                                                    | 0.2399 | 0.0486 |
| 16810298 | MGC15885     | uncharacterized protein MGC15885                                   | 0.143  | 0.0346 |
| 16810341 | CA12         | carbonic anhydrase XII                                             | 0.2089 | 0.0098 |
| 16811185 |              |                                                                    | 0.113  | 0.0289 |
| 16811523 | LOXL1-AS1    | LOXL1 antisense RNA 1 (non-protein coding)                         | 0.2868 | 0.0207 |
| 16811751 |              |                                                                    | 0.1229 | 0.0091 |



|          |              |                                                                                                       |        |        |
|----------|--------------|-------------------------------------------------------------------------------------------------------|--------|--------|
| 16812274 | RASGRF1      | Ras protein-specific guanine nucleotide-releasing factor 1                                            | 0.6962 | 0.0478 |
| 16812381 | MIR549       | microRNA 549                                                                                          | 0.1127 | 0.0125 |
| 16813010 | DET1         | de-etiolated homolog 1 (Arabidopsis)                                                                  | 0.1589 | 0.0311 |
| 16813024 | MIR3529      | microRNA 3529                                                                                         | 0.2167 | 0.0038 |
| 16813038 | MFG8         | milk fat globule-EGF factor 8 protein                                                                 | 0.5765 | 0.0192 |
| 16813425 |              |                                                                                                       | 0.1808 | 0.0213 |
| 16813627 |              |                                                                                                       | 0.1382 | 0.0138 |
| 16814170 | ARHGDIG      | Rho GDP dissociation inhibitor (GDI) gamma                                                            | 0.1955 | 0.0266 |
| 16814230 | DECR2        | 2,4-dienoyl CoA reductase 2, peroxisomal                                                              | 0.2065 | 0.0446 |
| 16814310 | PIGQ         | phosphatidylinositol glycan anchor biosynthesis, class Q                                              | 0.2074 | 0.039  |
| 16814619 | TPSAB1       | tryptase alpha/beta 1                                                                                 | 0.3708 | 0.0461 |
| 16814636 | UBE2I        | ubiquitin-conjugating enzyme E2I                                                                      | 0.3431 | 0.0007 |
| 16814854 | NDUFB10      | NADH dehydrogenase (ubiquinone) 1 beta subcomplex, 10, 22kDa                                          | 0.2849 | 0.0299 |
| 16814910 | NPW          | neuropeptide W                                                                                        | 0.2237 | 0.0101 |
| 16815023 | MLST8        | MTOR associated protein, LST8 homolog (S. cerevisiae)                                                 | 0.1904 | 0.0449 |
| 16815072 | ABCA17P      | ATP-binding cassette, sub-family A (ABC1), member 17, pseudogene                                      | 0.2585 | 0.0327 |
| 16815128 | TBC1D24      | TBC1 domain family, member 24                                                                         | 0.3583 | 0.0036 |
| 16815259 | FLYWCH1      | FLYWCH-type zinc finger 1                                                                             | 0.2176 | 0.0065 |
| 16815461 | CLUAP1       | clusterin associated protein 1                                                                        | 0.2672 | 0.0365 |
| 16815498 | GLIS2        | GLIS family zinc finger 2                                                                             | 0.5679 | 0.0032 |
| 16815586 | C16orf71     | chromosome 16 open reading frame 71                                                                   | 0.1601 | 0.0064 |
| 16815735 | ABAT         | 4-aminobutyrate aminotransferase                                                                      | 2.023  | 0      |
| 16815807 | LOC100287628 | uncharacterized LOC100287628                                                                          | 0.7736 | 0.0274 |
| 16815828 | CIITA        | class II, major histocompatibility complex, transactivator                                            | 0.5119 | 0.0194 |
| 16815852 | LOC100505564 | uncharacterized LOC100505564                                                                          | 0.3973 | 0.0045 |
| 16815903 |              |                                                                                                       | 0.225  | 0.0235 |
| 16815918 | TNFRSF17     | tumor necrosis factor receptor superfamily, member 17                                                 | 0.2331 | 0.0198 |
| 16816102 | NOMO1        | NODAL modulator 1                                                                                     | 0.3425 | 0.0445 |
| 16816140 | PDXDC1       | pyridoxal-dependent decarboxylase domain containing 1                                                 | 0.3328 | 0.0082 |
| 16816171 |              |                                                                                                       | 0.2071 | 0.0209 |
| 16816373 | ABCC6P1      | ATP-binding cassette, sub-family C, member 6 pseudogene 1                                             | 0.4787 | 0.0034 |
| 16816408 | COQ7         | coenzyme Q7 homolog, ubiquinone (yeast)                                                               | 0.2996 | 0.0208 |
| 16816542 | IQCK         | IQ motif containing K                                                                                 | 0.3254 | 0.014  |
| 16816739 | UQCRC2       | ubiquinol-cytochrome c reductase core protein II                                                      | 0.437  | 0.0016 |
| 16817212 | RN5S405      | RNA, 5S ribosomal 405                                                                                 | 0.3223 | 0.0462 |
| 16817254 | IL4R         | interleukin 4 receptor                                                                                | 0.323  | 0.0355 |
| 16817283 | KIAA0556     | KIAA0556                                                                                              | 0.1891 | 0.0384 |
| 16817314 |              |                                                                                                       | 0.174  | 0.0126 |
| 16817601 | LOC606724    | coronin, actin binding protein, 1A pseudogene                                                         | 0.2509 | 0.0159 |
| 16817624 | SPN          | sialophorin                                                                                           | 0.2177 | 0.0485 |
| 16817692 | MVP          | major vault protein                                                                                   | 0.6744 | 0.001  |
| 16817860 | MYLPF        | myosin light chain, phosphorylatable, fast skeletal muscle                                            | 0.1178 | 0.0416 |
| 16817883 | ITGAL        | integrin, alpha L (antigen CD11A (p180), lymphocyte function-associated antigen 1; alpha polypeptide) | 0.4145 | 0.0002 |
| 16818114 | HSD3B7       | hydroxy-delta-5-steroid dehydrogenase, 3 beta- and steroid delta-isomerase 7                          | 0.2632 | 0.018  |
| 16818125 | STX4         | syntaxin 4                                                                                            | 0.3192 | 0.0018 |
| 16818165 | BCKDK        | branched chain ketoacid dehydrogenase kinase                                                          | 0.49   | 0.0104 |
| 16818305 | ITGAD        | integrin, alpha D                                                                                     | 0.1696 | 0.0054 |
| 16818431 | ZNF267       | zinc finger protein 267                                                                               | 0.4529 | 0.0089 |
| 16818440 |              |                                                                                                       | 0.2003 | 0.0272 |
| 16818696 |              |                                                                                                       | 0.1917 | 0.0055 |
| 16818820 | NOD2         | nucleotide-binding oligomerization domain containing 2                                                | 0.133  | 0.0333 |
| 16818842 | CYLD         | cylindromatosis (turban tumor syndrome)                                                               | 0.4787 | 0.0121 |

|          |              |                                                                                                |        |        |
|----------|--------------|------------------------------------------------------------------------------------------------|--------|--------|
| 16818866 |              |                                                                                                | 0.1564 | 0.0212 |
| 16818880 |              |                                                                                                | 0.1724 | 0.0304 |
| 16818883 |              |                                                                                                | 0.1812 | 0.0056 |
| 16818897 |              |                                                                                                | 0.221  | 0.0201 |
| 16818925 |              |                                                                                                | 0.1712 | 0.018  |
| 16818980 | RBL2         | retinoblastoma-like 2 (p130)                                                                   | 0.4586 | 0.0065 |
| 16819010 | FTO          | fat mass and obesity associated                                                                | 0.307  | 0.0081 |
| 16819062 | MMP2         | matrix metalloproteinase 2 (gelatinase A, 72kDa gelatinase, 72kDa type IV collagenase)         | 0.1272 | 0.0441 |
| 16819082 | LPCAT2       | lysophosphatidylcholine acyltransferase 2                                                      | 1.436  | 0.0001 |
| 16819099 | CAPNS2       | calpain, small subunit 2                                                                       | 0.1718 | 0.0324 |
| 16819247 | MT1B         | metallothionein 1B                                                                             | 0.2058 | 0.0249 |
| 16819262 | MT1IP        | metallothionein 1I, pseudogene                                                                 | 0.2091 | 0.0073 |
| 16819325 | HERPUD1      | homocysteine-inducible, endoplasmic reticulum stress-inducible, ubiquitin-like domain member 1 | 0.5559 | 0.0058 |
| 16819336 | CETP         | cholesteryl ester transfer protein, plasma                                                     | 0.4342 | 0.0206 |
| 16819355 | NLRC5        | NLR family, CARD domain containing 5                                                           | 0.3361 | 0.014  |
| 16819600 | KATNB1       | katanin p80 (WD repeat containing) subunit B 1                                                 | 0.2913 | 0.0169 |
| 16819630 | TEPP         | testis, prostate and placenta expressed                                                        | 0.1342 | 0.0193 |
| 16819666 | CCDC113      | coiled-coil domain containing 113                                                              | 0.5344 | 0.0213 |
| 16819689 | NDRG4        | NDRG family member 4                                                                           | 1.3194 | 0.0008 |
| 16819714 |              |                                                                                                | 1.008  | 0.0066 |
| 16819774 |              |                                                                                                | 0.2577 | 0      |
| 16819813 | LOC100505865 | uncharacterized LOC100505865                                                                   | 0.6003 | 0.0055 |
| 16819961 | C16orf70     | chromosome 16 open reading frame 70                                                            | 0.293  | 0.0087 |
| 16820388 | PLA2G15      | phospholipase A2, group XV                                                                     | 0.554  | 0.0058 |
| 16820439 | ZFP90        | zinc finger protein 90 homolog (mouse)                                                         | 0.4072 | 0.0249 |
| 16820818 | SNORD111B    | small nucleolar RNA, C/D box 111B                                                              | 0.2193 | 0.0167 |
| 16820838 |              |                                                                                                | 0.3636 | 0.0027 |
| 16820849 | CALB2        | calbindin 2                                                                                    | 1.1868 | 0.0437 |
| 16820863 | LOC100506105 | uncharacterized LOC100506105                                                                   | 0.1375 | 0.0187 |
| 16820868 |              |                                                                                                | 0.1841 | 0.0291 |
| 16820873 | CHST4        | carbohydrate (N-acetylglucosamine 6-O) sulfotransferase 4                                      | 0.3937 | 0.026  |
| 16820883 | MARVELD3     | MARVEL domain containing 3                                                                     | 0.2266 | 0.0023 |
| 16820999 | LOC100506172 | uncharacterized LOC100506172                                                                   | 0.2096 | 0.0035 |
| 16821008 |              |                                                                                                | 0.1711 | 0.0059 |
| 16821072 | CHST6        | carbohydrate (N-acetylglucosamine 6-O) sulfotransferase 6                                      | 0.8622 | 0.002  |
| 16821076 | GABARAPL2    | GABA(A) receptor-associated protein-like 2                                                     | 0.4354 | 0.0058 |
| 16821139 | MON1B        | MON1 homolog B (yeast)                                                                         | 0.2738 | 0.0354 |
| 16821193 | WWOX         | WW domain containing oxidoreductase                                                            | 0.236  | 0.0119 |
| 16821266 | BCMO1        | beta-carotene 15,15'-monooxygenase 1                                                           | 0.1577 | 0.0185 |
| 16821614 | COX4I1       | cytochrome c oxidase subunit IV isoform 1                                                      | 0.2175 | 0.0122 |
| 16821615 |              |                                                                                                | 0.3963 | 0.0221 |
| 16821618 |              |                                                                                                | 0.1967 | 0.013  |
| 16821619 |              |                                                                                                | 0.2375 | 0.0076 |
| 16821620 |              |                                                                                                | 0.1828 | 0.0077 |
| 16821621 | IRF8         | interferon regulatory factor 8                                                                 | 0.3023 | 0.0237 |
| 16821687 |              |                                                                                                | 0.1562 | 0.0331 |
| 16822089 | ZNF276       | zinc finger protein 276                                                                        | 0.2433 | 0.0138 |
| 16822224 | GAS8         | growth arrest-specific 8                                                                       | 0.3344 | 0.0045 |
| 16822548 | NARFL        | nuclear prelamin A recognition factor-like                                                     | 0.3109 | 0.0029 |
| 16822589 | GNG13        | guanine nucleotide binding protein (G protein), gamma 13                                       | 0.1248 | 0.0189 |
| 16822637 | TPSB2        | trypsin beta 2 (gene/pseudogene)                                                               | 0.3946 | 0.0345 |
| 16822762 | IFT140       | intraflagellar transport 140 homolog (Chlamydomonas)                                           | 0.2551 | 0.0107 |
| 16823109 | ABCA3        | ATP-binding cassette, sub-family A (ABC1), member 3                                            | 0.9408 | 0.0012 |
| 16823200 |              |                                                                                                | 0.1901 | 0.0149 |
| 16823210 |              |                                                                                                | 0.2422 | 0.0473 |
| 16823212 | PRSS30P      | protease, serine, 30 homolog (mouse), pseudogene                                               | 0.1639 | 0.0499 |

|          |              |                                                                      |        |        |
|----------|--------------|----------------------------------------------------------------------|--------|--------|
| 16823215 | PRSS22       | protease, serine, 22                                                 | 0.1942 | 0.0191 |
| 16823255 | HCFC1R1      | host cell factor C1 regulator 1 (XPO1 dependent)                     | 0.5279 | 0.0019 |
| 16823393 | SLX4         | SLX4 structure-specific endonuclease subunit homolog (S. cerevisiae) | 0.125  | 0.0284 |
| 16823570 | C16orf5      | chromosome 16 open reading frame 5                                   | 0.5306 | 0.0006 |
| 16823666 | PPL          | periplakin                                                           | 1.1102 | 0      |
| 16823736 |              |                                                                      | 0.1513 | 0.0153 |
| 16823738 |              |                                                                      | 0.1674 | 0.0378 |
| 16823744 | RNU7-63P     | RNA, U7 small nuclear 63 pseudogene                                  | 0.2131 | 0.0062 |
| 16824429 | NOMO2        | NODAL modulator 2                                                    | 0.2807 | 0.0456 |
| 16824639 | ACSM2B       | acyl-CoA synthetase medium-chain family member 2B                    | 0.283  | 0.0102 |
| 16824907 | IGSF6        | immunoglobulin superfamily, member 6                                 | 0.3195 | 0.0416 |
| 16824989 | CDR2         | cerebellar degeneration-related protein 2, 62kDa                     | 0.3291 | 0.0424 |
| 16825035 | COG7         | component of oligomeric golgi complex 7                              | 0.3254 | 0.0102 |
| 16825193 |              |                                                                      | 0.1335 | 0.0213 |
| 16825196 | NSMCE1       | non-SMC element 1 homolog (S. cerevisiae)                            | 0.4903 | 0.004  |
| 16825371 | NUPR1        | nuclear protein, transcriptional regulator, 1                        | 1.0348 | 0.0199 |
| 16825561 | SEZ6L2       | seizure related 6 homolog (mouse)-like 2                             | 0.6985 | 0.0002 |
| 16825779 | 1-Sep        | septin 1                                                             | 0.2424 | 0.0119 |
| 16825800 | SEPHS2       | selenophosphate synthetase 2                                         | 0.3059 | 0.0246 |
| 16825828 | ZNF764       | zinc finger protein 764                                              | 0.2374 | 0.0261 |
| 16825970 | PRSS8        | protease, serine, 8                                                  | 0.249  | 0.0441 |
| 16826175 | VPS35        | vacuolar protein sorting 35 homolog (S. cerevisiae)                  | 0.4297 | 0.0006 |
| 16826218 | DNAJA2       | DnaJ (Hsp40) homolog, subfamily A, member 2                          | 0.361  | 0.0034 |
| 16826389 | ZNF423       | zinc finger protein 423                                              | 0.7319 | 0.0034 |
| 16826414 | BRD7         | bromodomain containing 7                                             | 0.4584 | 0.0016 |
| 16826435 |              |                                                                      | 0.28   | 0.0254 |
| 16826444 | SNX20        | sorting nexin 20                                                     | 0.1638 | 0.0123 |
| 16826468 |              |                                                                      | 0.1443 | 0.0417 |
| 16826539 | AKTIP        | AKT interacting protein                                              | 0.6338 | 0.0016 |
| 16826743 | FAM192A      | family with sequence similarity 192, member A                        | 0.2711 | 0.0165 |
| 16826779 | DOK4         | docking protein 4                                                    | 0.4255 | 0.0338 |
| 16826892 | CSNK2A2      | casein kinase 2, alpha prime polypeptide                             | 0.3177 | 0.0388 |
| 16826905 |              |                                                                      | 0.1642 | 0.0297 |
| 16827016 |              |                                                                      | 0.1507 | 0.0088 |
| 16827086 |              |                                                                      | 0.1658 | 0.0003 |
| 16827103 | TK2          | thymidine kinase 2, mitochondrial                                    | 0.4533 | 0.006  |
| 16827227 | RRAD         | Ras-related associated with diabetes                                 | 0.6319 | 0.009  |
| 16827243 |              |                                                                      | 0.1459 | 0.0093 |
| 16827483 | PSMB10       | proteasome (prosome, macropain) subunit, beta type, 10               | 0.3104 | 0.0185 |
| 16827874 | HYDIN        | HYDIN, axonemal central pair apparatus protein                       | 0.4608 | 0.0026 |
| 16827996 | FTSJD1       | FtsJ methyltransferase domain containing 1                           | 0.3442 | 0.0018 |
| 16828006 | ZNF23        | zinc finger protein 23 (KOX 16)                                      | 0.238  | 0.0468 |
| 16828450 | CFDP1        | craniofacial development protein 1                                   | 0.3103 | 0.0052 |
| 16828471 | CHST6        | carbohydrate (N-acetylglucosamine 6-O) sulfotransferase 6            | 0.7773 | 0.0043 |
| 16828485 | TMEM231      | transmembrane protein 231                                            | 0.7125 | 0.0001 |
| 16828525 |              |                                                                      | 0.3427 | 0.0224 |
| 16828542 |              |                                                                      | 0.1039 | 0.0426 |
| 16828630 | C16orf46     | chromosome 16 open reading frame 46                                  | 0.2886 | 0.0286 |
| 16828640 | GCSH         | glycine cleavage system protein H (aminomethyl carrier)              | 0.4938 | 0.0048 |
| 16828852 | FAM92B       | family with sequence similarity 92, member B                         | 0.177  | 0.0407 |
| 16829426 | DBNDD1       | dysbindin (dystrobrevin binding protein 1) domain containing 1       | 0.1471 | 0.039  |
| 16829433 | C16orf3      | chromosome 16 open reading frame 3                                   | 0.2786 | 0.0075 |
| 16829437 | LOC100130015 | 5-hydroxyisourate hydrolase pseudogene                               | 0.3086 | 0.0022 |
| 16829718 | OR1A2        | olfactory receptor, family 1, subfamily A, member 2                  | 0.1965 | 0.0324 |
| 16830455 | TMEM102      | transmembrane protein 102                                            | 0.3066 | 0.0495 |
| 16830837 | SCARNA21     | small Cajal body-specific RNA 21                                     | 0.2034 | 0.0154 |

|          |              |                                                                      |        |        |
|----------|--------------|----------------------------------------------------------------------|--------|--------|
| 16830863 | GUCY2D       | guanylate cyclase 2D, membrane (retina-specific)                     | 0.1388 | 0.0189 |
| 16831247 | ARHGAP44     | Rho GTPase activating protein 44                                     | 0.5284 | 0.0048 |
| 16831523 |              |                                                                      | 0.1402 | 0.0254 |
| 16831612 |              |                                                                      | 0.1789 | 0.0068 |
| 16832015 | LOC100132472 | uncharacterized LOC100132472                                         | 0.2179 | 0.0059 |
| 16832101 |              |                                                                      | 0.1659 | 0.0139 |
| 16832227 | CDRT15L2     | CMT1A duplicated region transcript 15-like 2                         | 0.2193 | 0.0473 |
| 16832312 | FLJ36000     | uncharacterized FLJ36000                                             | 0.251  | 0.0262 |
| 16833000 | RAB11FIP4    | RAB11 family interacting protein 4 (class II)                        | 0.6667 | 0.0028 |
| 16833017 | MIR193A      | microRNA 193a                                                        | 0.281  | 0.002  |
| 16833024 | MIR4725      | microRNA 4725                                                        | 0.2924 | 0.0312 |
| 16833164 |              |                                                                      | 0.19   | 0.0119 |
| 16833327 | SLFN5        | schlafen family member 5                                             | 1.0567 | 0.0007 |
| 16833336 |              |                                                                      | 0.3216 | 0.0332 |
| 16833409 |              |                                                                      | 0.2514 | 0.0378 |
| 16833433 | CCL4L2       | chemokine (C-C motif) ligand 4-like 2                                | 0.5165 | 0.0002 |
| 16833730 | LRRC37A11P   | leucine rich repeat containing 37, member A11, pseudogene            | 0.1771 | 0.0243 |
| 16833876 | GRB7         | growth factor receptor-bound protein 7                               | 0.2027 | 0.0202 |
| 16833901 |              |                                                                      | 0.3706 | 0.0012 |
| 16834108 |              |                                                                      | 0.1484 | 0.0261 |
| 16834230 | TTC25        | tetratricopeptide repeat domain 25                                   | 0.3511 | 0.0005 |
| 16834302 | ATP6V0A1     | ATPase, H+ transporting, lysosomal V0 subunit a1                     | 0.3316 | 0.0236 |
| 16834603 | TMEM106A     | transmembrane protein 106A                                           | 0.4802 | 0.025  |
| 16834621 | ARL4D        | ADP-ribosylation factor-like 4D                                      | 0.4428 | 0.0182 |
| 16834664 | C17orf105    | chromosome 17 open reading frame 105                                 | 0.1237 | 0.031  |
| 16834749 | RUNDC3A      | RUN domain containing 3A                                             | 0.6456 | 0.0113 |
| 16834812 | DBF4B        | DBF4 homolog B (S. cerevisiae)                                       | 0.1596 | 0.0335 |
| 16835174 | C17orf57     | chromosome 17 open reading frame 57                                  | 0.4531 | 0.0034 |
| 16835213 | NPEPPS       | aminopeptidase puromycin sensitive                                   | 0.2757 | 0.0079 |
| 16835672 | ITGA3        | integrin, alpha 3 (antigen CD49C, alpha 3 subunit of VLA-3 receptor) | 0.5631 | 0.0305 |
| 16835711 | PDK2         | pyruvate dehydrogenase kinase, isozyme 2                             | 0.5812 | 0.0031 |
| 16836214 | TOM1L1       | target of myb1 (chicken)-like 1                                      | 0.5013 | 0.0362 |
| 16836292 | ANKFN1       | ankyrin-repeat and fibronectin type III domain containing 1          | 0.3454 | 0.0085 |
| 16836311 | NOG          | noggin                                                               | 0.2329 | 0.0043 |
| 16836409 | OR4D1        | olfactory receptor, family 4, subfamily D, member 1                  | 0.2306 | 0.0153 |
| 16836624 | MIR21        | microRNA 21                                                          | 0.8041 | 0.0352 |
| 16836677 |              |                                                                      | 0.2176 | 0.0255 |
| 16837128 | PRKCA        | protein kinase C, alpha                                              | 0.9637 | 0.0228 |
| 16837292 |              |                                                                      | 0.2947 | 0.0171 |
| 16837298 | AMZ2         | archaelysin family metalloproteinase 2                               | 0.3256 | 0.0413 |
| 16837308 | ARSG         | arylsulfatase G                                                      | 0.6136 | 0.0016 |
| 16837324 |              |                                                                      | 0.2363 | 0.0181 |
| 16837411 |              |                                                                      | 0.163  | 0.0263 |
| 16837418 | SOX9         | SRY (sex determining region Y)-box 9                                 | 0.705  | 0.0002 |
| 16837471 | LOC400620    | uncharacterized LOC400620                                            | 0.1275 | 0.0412 |
| 16837609 | RAB37        | RAB37, member RAS oncogene family                                    | 0.2477 | 0.0102 |
| 16837766 |              |                                                                      | 0.1357 | 0.0275 |
| 16837820 | LLGL2        | lethal giant larvae homolog 2 (Drosophila)                           | 0.3593 | 0.0359 |
| 16838001 | TEN1-CDK3    | TEN1-CDK3 readthrough                                                | 0.1794 | 0.0188 |
| 16838040 | RNF157-AS1   | RNF157 antisense RNA 1 (non-protein coding)                          | 0.2362 | 0.0082 |
| 16838263 |              |                                                                      | 0.1969 | 0.014  |
| 16838300 | TMC8         | transmembrane channel-like 8                                         | 0.23   | 0.0165 |
| 16839425 | SLC43A2      | solute carrier family 43, member 2                                   | 0.4145 | 0.0106 |
| 16839443 |              |                                                                      | 0.4157 | 0.0304 |
| 16839853 | CAMKK1       | calcium/calmodulin-dependent protein kinase kinase 1, alpha          | 0.31   | 0.0111 |
| 16840015 |              |                                                                      | 0.1582 | 0.0499 |
| 16840318 | NLRP1        | NLR family, pyrin domain containing 1                                | 0.7359 | 0.0399 |

|          |                  |                                                                                       |        |        |
|----------|------------------|---------------------------------------------------------------------------------------|--------|--------|
| 16840346 |                  |                                                                                       | 0.2469 | 0.0021 |
| 16840442 |                  |                                                                                       | 0.4174 | 0.0268 |
| 16841106 | STX8             | syntaxin 8                                                                            | 0.3165 | 0.0308 |
| 16841530 | MIR548H3         | microRNA 548h-3                                                                       | 0.2739 | 0.0262 |
| 16841788 |                  |                                                                                       | 0.1591 | 0.0314 |
| 16842183 | ZNF286B          | zinc finger protein 286B                                                              | 0.146  | 0.0421 |
| 16842219 |                  |                                                                                       | 0.1876 | 0.0474 |
| 16842242 | B9D1             | B9 protein domain 1                                                                   | 0.3655 | 0.0018 |
| 16842403 | LGALS9B          | lectin, galactoside-binding, soluble, 9B                                              | 0.3198 | 0.0087 |
| 16842510 |                  |                                                                                       | 0.5055 | 0.0397 |
| 16842572 | KRT18P55         | keratin 18 pseudogene 55                                                              | 0.2324 | 0.003  |
| 16842626 | UNC119           | unc-119 homolog (C. elegans)                                                          | 0.3657 | 0.0492 |
| 16843078 | SLC6A4           | solute carrier family 6 (neurotransmitter transporter, serotonin), member 4           | 0.1817 | 0.0038 |
| 16843115 | TMIGD1           | transmembrane and immunoglobulin domain containing 1                                  | 0.1691 | 0.0073 |
| 16843176 |                  |                                                                                       | 0.2092 | 0.0184 |
| 16843179 | C17orf79         | chromosome 17 open reading frame 79                                                   | 0.3617 | 0.004  |
| 16843219 | ARGFXP2          | arginine-fifty homeobox pseudogene 2                                                  | 0.2184 | 0.0356 |
| 16843303 |                  |                                                                                       | 0.127  | 0.0274 |
| 16843306 |                  |                                                                                       | 0.1685 | 0.0095 |
| 16843446 | SLFN12L          | schlafen family member 12-like                                                        | 0.3456 | 0.0015 |
| 16843469 | GAS2L2           | growth arrest-specific 2 like 2                                                       | 0.1313 | 0.0398 |
| 16843511 | CCL5             | chemokine (C-C motif) ligand 5                                                        | 0.6809 | 0.0001 |
| 16844207 | IKZF3            | IKAROS family zinc finger 3 (Aiolos)                                                  | 0.3487 | 0.0022 |
| 16844533 | KRT40            | keratin 40                                                                            | 0.159  | 0.0339 |
| 16844585 | LOC730755        | keratin associated protein 2-4-like                                                   | 0.1641 | 0.0147 |
| 16844622 | KRTAP4-2         | keratin associated protein 4-2                                                        | 0.2464 | 0.049  |
| 16844638 | KRTAP16-1        | keratin associated protein 16-1                                                       | 0.1608 | 0.016  |
| 16844752 | KRT15            | keratin 15                                                                            | 0.1733 | 0.0027 |
| 16844775 | KRT19            | keratin 19                                                                            | 0.2691 | 0.0256 |
| 16845126 | STAT3            | signal transducer and activator of transcription 3 (acute-phase response factor)      | 0.2686 | 0.0302 |
| 16845290 |                  |                                                                                       | 0.2288 | 0.0004 |
| 16845384 | TMEM106A-AS1     | TMEM106A antisense RNA 1 (non-protein coding)                                         | 0.3885 | 0.0165 |
| 16845427 | MEOX1            | mesenchyme homeobox 1                                                                 | 0.1001 | 0.0465 |
| 16845526 |                  |                                                                                       | 0.1343 | 0.0429 |
| 16845856 | LOC339192        | uncharacterized LOC339192                                                             | 0.2179 | 0.0003 |
| 16846157 | PRR15L           | proline rich 15-like                                                                  | 0.1742 | 0.0371 |
| 16846543 |                  |                                                                                       | 0.2687 | 0.0484 |
| 16846546 | SAMD14           | sterile alpha motif domain containing 14                                              | 0.132  | 0.0275 |
| 16846685 |                  |                                                                                       | 0.3322 | 0.0212 |
| 16846742 |                  |                                                                                       | 0.2925 | 0.0023 |
| 16846849 | COX11            | COX11 cytochrome c oxidase assembly homolog (yeast)                                   | 0.2319 | 0.0352 |
| 16847251 | MIR301A          | microRNA 301a                                                                         | 0.2085 | 0.0061 |
| 16847258 |                  |                                                                                       | 0.1155 | 0.0432 |
| 16847296 | TBC1D3P1-DHX40P1 | TBC1D3P1-DHX40P1 readthrough (non-protein coding)                                     | 0.1755 | 0.0448 |
| 16847352 | LOC653653        | adaptor-related protein complex 1, sigma 2 subunit pseudogene                         | 0.2805 | 0.0126 |
| 16847416 |                  |                                                                                       | 0.1626 | 0.0496 |
| 16847483 |                  |                                                                                       | 0.211  | 0.0076 |
| 16847565 | CYB561           | cytochrome b-561                                                                      | 0.503  | 0.0124 |
| 16847878 | PLEKHM1P         | pleckstrin homology domain containing, family M (with RUN domain) member 1 pseudogene | 0.1823 | 0.0134 |
| 16848070 | SLC16A6          | solute carrier family 16, member 6 (monocarboxylic acid transporter 7)                | 0.7661 | 0.0387 |
| 16848361 |                  |                                                                                       | 0.1192 | 0.0181 |
| 16848366 |                  |                                                                                       | 0.2741 | 0.0105 |
| 16848405 | FLJ37644         | uncharacterized LOC400618                                                             | 0.1908 | 0.0162 |

|          |              |                                                                 |        |        |
|----------|--------------|-----------------------------------------------------------------|--------|--------|
| 16848938 | WBP2         | WW domain binding protein 2                                     | 0.3091 | 0.0409 |
| 16848993 | FBF1         | Fas (TNFRSF6) binding factor 1                                  | 0.1825 | 0.0115 |
| 16849339 | MIR4316      | microRNA 4316                                                   | 0.366  | 0.0033 |
| 16849355 | TMC6         | transmembrane channel-like 6                                    | 0.1308 | 0.0245 |
| 16849576 | LGALS3BP     | lectin, galactoside-binding, soluble, 3 binding protein         | 0.7777 | 0.0044 |
| 16849740 | MIR657       | microRNA 657                                                    | 0.2186 | 0.0217 |
| 16850189 | CSNK1D       | casein kinase 1, delta                                          | 0.2574 | 0.0301 |
| 16850402 |              |                                                                 | 0.7111 | 0.022  |
| 16850501 |              |                                                                 | 0.1675 | 0.0094 |
| 16850841 |              |                                                                 | 0.1547 | 0.0224 |
| 16851042 | ANKRD62      | ankyrin repeat domain 62                                        | 0.1324 | 0.0297 |
| 16851060 |              |                                                                 | 0.2319 | 0.0214 |
| 16851062 | C18orf61     | uncharacterized LOC497259                                       | 0.1607 | 0.0168 |
| 16851303 | MIR3156-2    | microRNA 3156-2                                                 | 0.1626 | 0.0081 |
| 16851727 | DSG4         | desmoglein 4                                                    | 0.1738 | 0.014  |
| 16851768 | DSG2         | desmoglein 2                                                    | 1.1996 | 0.0321 |
| 16851801 | RNF125       | ring finger protein 125, E3 ubiquitin protein ligase            | 0.4921 | 0.0004 |
| 16851866 | DTNA         | dystrobrevin, alpha                                             | 1.3446 | 0.0003 |
| 16852486 |              |                                                                 | 0.2081 | 0.0025 |
| 16852489 |              |                                                                 | 0.2692 | 0.0143 |
| 16852619 |              |                                                                 | 0.2256 | 0      |
| 16852622 | MALT1        | mucosa associated lymphoid tissue lymphoma translocation gene 1 | 0.2604 | 0.005  |
| 16852642 |              |                                                                 | 0.242  | 0.0095 |
| 16852666 | SEC11C       | SEC11 homolog C ( <i>S. cerevisiae</i> )                        | 0.6292 | 0.003  |
| 16852683 | PMAIP1       | phorbol-12-myristate-13-acetate-induced protein 1               | 0.6789 | 0.0079 |
| 16852700 |              |                                                                 | 0.453  | 0.0214 |
| 16852718 |              |                                                                 | 0.2252 | 0.002  |
| 16852824 | SERPINB12    | serpin peptidase inhibitor, clade B (ovalbumin), member 12      | 0.1722 | 0.0384 |
| 16852858 | SERPINB7     | serpin peptidase inhibitor, clade B (ovalbumin), member 7       | 0.1188 | 0.0299 |
| 16852886 | SERPINB10    | serpin peptidase inhibitor, clade B (ovalbumin), member 10      | 0.105  | 0.0241 |
| 16852938 | CDH7         | cadherin 7, type 2                                              | 0.3099 | 0.0309 |
| 16853068 | LOC100505838 | uncharacterized LOC100505838                                    | 0.1475 | 0.0066 |
| 16853135 |              |                                                                 | 0.1922 | 0.0353 |
| 16853214 |              |                                                                 | 0.1577 | 0.0138 |
| 16853474 | LOC100653102 | uncharacterized LOC100653102                                    | 0.2227 | 0.0243 |
| 16853799 | LOC100192426 | uncharacterized LOC100192426                                    | 0.167  | 0.0172 |
| 16853812 |              |                                                                 | 0.1653 | 0.0077 |
| 16853863 |              |                                                                 | 0.2429 | 0.0346 |
| 16853879 | PIEZO2       | piezo-type mechanosensitive ion channel component 2             | 1.0848 | 0.0015 |
| 16853982 |              |                                                                 | 0.1886 | 0.0235 |
| 16854214 |              |                                                                 | 0.2434 | 0.0224 |
| 16854357 |              |                                                                 | 0.1644 | 0.0167 |
| 16854411 |              |                                                                 | 0.144  | 0.0428 |
| 16854414 | AQP4         | aquaporin 4                                                     | 0.2953 | 0.0271 |
| 16854463 |              |                                                                 | 0.2382 | 0.0167 |
| 16854533 | LOC100652770 | uncharacterized LOC100652770                                    | 0.258  | 0.0245 |
| 16854805 |              |                                                                 | 0.1293 | 0.0411 |
| 16855108 |              |                                                                 | 0.1507 | 0.0409 |
| 16855161 | MIR4744      | microRNA 4744                                                   | 0.1258 | 0.0267 |
| 16855246 | CCDC11       | coiled-coil domain containing 11                                | 0.4479 | 0.0096 |
| 16855316 |              |                                                                 | 0.1216 | 0.0018 |
| 16855340 | SNORA37      | small nucleolar RNA, H/ACA box 37                               | 0.3913 | 0.0089 |
| 16855355 |              |                                                                 | 0.2135 | 0.0226 |
| 16855421 | FLJ45743     | uncharacterized LOC642484                                       | 0.1834 | 0.0138 |
| 16855541 | MIR3591      | microRNA 3591                                                   | 0.1798 | 0.0159 |
| 16855761 | CDH19        | cadherin 19, type 2                                             | 0.1617 | 0.0485 |
| 16855810 | CD226        | CD226 molecule                                                  | 0.2736 | 0.006  |

|          |              |                                                                                   |        |        |
|----------|--------------|-----------------------------------------------------------------------------------|--------|--------|
| 16855884 | LOC100505776 | uncharacterized LOC100505776                                                      | 0.2012 | 0.006  |
| 16855906 | NETO1        | neuropilin (NRP) and tolloid (TLL)-like 1                                         | 0.1232 | 0.0462 |
| 16855950 |              |                                                                                   | 0.1057 | 0.0413 |
| 16856159 | PARD6G       | par-6 partitioning defective 6 homolog gamma (C. elegans)                         | 0.1461 | 0.0364 |
| 16856239 | PALM         | paralemmin                                                                        | 0.6069 | 0.0001 |
| 16856249 | C19orf21     | chromosome 19 open reading frame 21                                               | 0.2915 | 0.0177 |
| 16856543 | NDUFS7       | NADH dehydrogenase (ubiquinone) Fe-S protein 7, 20kDa (NADH-coenzyme Q reductase) | 0.1949 | 0.031  |
| 16856604 | REEP6        | receptor accessory protein 6                                                      | 0.8497 | 0.0128 |
| 16856613 | PLK5         | polo-like kinase 5                                                                | 0.1641 | 0.0116 |
| 16856828 | ZNF554       | zinc finger protein 554                                                           | 0.4593 | 0.0097 |
| 16856834 | ZNF555       | zinc finger protein 555                                                           | 0.4723 | 0.0003 |
| 16857248 | MIR7-3HG     | MIR7-3 host gene (non-protein coding)                                             | 0.6992 | 0.0303 |
| 16857252 | MIR7-3       | microRNA 7-3                                                                      | 0.1386 | 0.0378 |
| 16857438 | ALKBH7       | alkB, alkylation repair homolog 7 (E. coli)                                       | 0.2681 | 0.0325 |
| 16857449 | CRB3         | crumbs homolog 3 (Drosophila)                                                     | 0.2184 | 0.0297 |
| 16857459 | TNFSF9       | tumor necrosis factor (ligand) superfamily, member 9                              | 0.291  | 0.0005 |
| 16857465 |              |                                                                                   | 0.2549 | 0.0268 |
| 16857794 | LRRRC8E      | leucine rich repeat containing 8 family, member E                                 | 0.6619 | 0.008  |
| 16857968 | OR7E24       | olfactory receptor, family 7, subfamily E, member 24                              | 0.2298 | 0.0423 |
| 16858049 | C3P1         | complement component 3 precursor pseudogene                                       | 0.136  | 0.0447 |
| 16858435 | CCDC159      | coiled-coil domain containing 159                                                 | 0.3142 | 0.0067 |
| 16858519 | ZNF441       | zinc finger protein 441                                                           | 0.4062 | 0.0293 |
| 16858546 | ZNF439       | zinc finger protein 439                                                           | 0.8031 | 0.0162 |
| 16858573 | ZNF763       | zinc finger protein 763                                                           | 0.4529 | 0.043  |
| 16858581 | LOC100507111 | uncharacterized LOC100507111                                                      | 0.2985 | 0.0245 |
| 16858592 | ZNF844       | zinc finger protein 844                                                           | 0.9617 | 0.0059 |
| 16858725 | LOC100507305 | uncharacterized LOC100507305                                                      | 0.8865 | 0.0394 |
| 16858800 | DAND5        | DAN domain family, member 5                                                       | 0.3227 | 0.0131 |
| 16858893 | CC2D1A       | coiled-coil and C2 domain containing 1A                                           | 0.2376 | 0.0475 |
| 16858936 | RLN3         | relaxin 3                                                                         | 0.1987 | 0.0054 |
| 16859018 | TECR         | trans-2,3-enoyl-CoA reductase                                                     | 0.2855 | 0.0252 |
| 16859070 |              |                                                                                   | 0.3631 | 0.0495 |
| 16859090 | CASP14       | caspase 14, apoptosis-related cysteine peptidase                                  | 0.1689 | 0.0044 |
| 16859115 |              |                                                                                   | 0.2351 | 0.003  |
| 16859205 |              |                                                                                   | 0.2029 | 0.0047 |
| 16859213 | OR10H4       | olfactory receptor, family 10, subfamily H, member 4                              | 0.2405 | 0.0216 |
| 16859437 | USE1         | unconventional SNARE in the ER 1 homolog (S. cerevisiae)                          | 0.2893 | 0.0313 |
| 16859536 |              |                                                                                   | 0.1209 | 0.0362 |
| 16859711 | MAST3        | microtubule associated serine/threonine kinase 3                                  | 0.3877 | 0.0228 |
| 16859763 | IFI30        | interferon, gamma-inducible protein 30                                            | 0.657  | 0.0392 |
| 16859783 |              |                                                                                   | 0.3084 | 0.0028 |
| 16859788 | PGPEP1       | pyroglutamyl-peptidase I                                                          | 0.8403 | 0.0063 |
| 16859795 | GDF15        | growth differentiation factor 15                                                  | 1.4449 | 0.0003 |
| 16859800 | MIR3189      | microRNA 3189                                                                     | 0.5225 | 0.0095 |
| 16859942 | SLC25A42     | solute carrier family 25, member 42                                               | 0.1201 | 0.0326 |
| 16860047 | NDUFA13      | NADH dehydrogenase (ubiquinone) 1 alpha subcomplex, 13                            | 0.2391 | 0.0249 |
| 16860087 | ZNF101       | zinc finger protein 101                                                           | 0.2962 | 0.01   |
| 16860508 | DPY19L3      | dpy-19-like 3 (C. elegans)                                                        | 0.5098 | 0.0026 |
| 16860531 | PDCD5        | programmed cell death 5                                                           | 0.3182 | 0.0382 |
| 16860888 | FXYD3        | FXYD domain containing ion transport regulator 3                                  | 0.1843 | 0.0123 |
| 16860920 | FXYD5        | FXYD domain containing ion transport regulator 5                                  | 0.5089 | 0.0182 |
| 16860959 | USF2         | upstream transcription factor 2, c-fos interacting                                | 0.318  | 0.0107 |
| 16860971 | HAMP         | hepcidin antimicrobial peptide                                                    | 0.564  | 0.0262 |
| 16861118 | COX6B1       | cytochrome c oxidase subunit VIb polypeptide 1 (ubiquitous)                       | 0.2017 | 0.0265 |
| 16861149 |              |                                                                                   | 0.1802 | 0.033  |
| 16861282 | APLP1        | amyloid beta (A4) precursor-like protein 1                                        | 0.6883 | 0.0006 |

|          |              |                                                                  |        |        |
|----------|--------------|------------------------------------------------------------------|--------|--------|
| 16861302 | HCST         | hematopoietic cell signal transducer                             | 0.4768 | 0.0165 |
| 16861367 | TBCB         | tubulin folding cofactor B                                       | 0.2167 | 0.0481 |
| 16861386 |              |                                                                  | 0.2253 | 0.0386 |
| 16861388 |              |                                                                  | 0.2233 | 0.0308 |
| 16861389 |              |                                                                  | 0.1972 | 0.0484 |
| 16861390 |              |                                                                  | 0.2018 | 0.0335 |
| 16861427 | ZNF382       | zinc finger protein 382                                          | 0.468  | 0.0003 |
| 16861465 | ZNF345       | zinc finger protein 345                                          | 0.2925 | 0.012  |
| 16861500 | ZNF420       | zinc finger protein 420                                          | 0.4634 | 0.0147 |
| 16861510 | ZNF383       | zinc finger protein 383                                          | 0.3399 | 0.0141 |
| 16861543 | ZNF527       | zinc finger protein 527                                          | 0.3859 | 0.0031 |
| 16861596 |              |                                                                  | 1.0085 | 0.0045 |
| 16861602 |              |                                                                  | 0.7875 | 0.0251 |
| 16861604 | SIPA1L3      | signal-induced proliferation-associated 1 like 3                 | 0.276  | 0.0079 |
| 16861630 | SPINT2       | serine peptidase inhibitor, Kunitz type, 2                       | 0.8512 | 0.0054 |
| 16862221 | SPTBN4       | spectrin, beta, non-erythrocytic 4                               | 0.2733 | 0.0008 |
| 16862397 | CYP2A13      | cytochrome P450, family 2, subfamily A, polypeptide 13           | 0.1559 | 0.0365 |
| 16862427 | CYP2S1       | cytochrome P450, family 2, subfamily S, polypeptide 1            | 0.2816 | 0.0389 |
| 16862529 | CEACAM21     | carcinoembryonic antigen-related cell adhesion molecule 21       | 0.2141 | 0.0005 |
| 16862604 | CD79A        | CD79a molecule, immunoglobulin-associated alpha                  | 0.1998 | 0.0329 |
| 16862904 | ZNF223       | zinc finger protein 223                                          | 0.4471 | 0.0178 |
| 16862936 | ZNF234       | zinc finger protein 234                                          | 0.2874 | 0.0181 |
| 16863036 |              |                                                                  | 0.2278 | 0.0209 |
| 16863061 |              |                                                                  | 0.1566 | 0.0269 |
| 16863216 | PPP1R37      | protein phosphatase 1, regulatory subunit 37                     | 0.188  | 0.0306 |
| 16863296 | PPM1N        | protein phosphatase, Mg2+/Mn2+ dependent, 1N (putative)          | 0.2643 | 0.0301 |
| 16863401 |              |                                                                  | 0.9718 | 0.0102 |
| 16863884 | NUCB1        | nucleobindin 1                                                   | 0.2504 | 0.0404 |
| 16864076 | DKKL1        | dickkopf-like 1                                                  | 0.2397 | 0.0035 |
| 16864586 | ACPT         | acid phosphatase, testicular                                     | 0.3106 | 0.0149 |
| 16864600 | MGC45922     | uncharacterized LOC284365                                        | 0.185  | 0.0048 |
| 16864611 |              |                                                                  | 0.2864 | 0.0363 |
| 16864829 | ZNF610       | zinc finger protein 610                                          | 0.5319 | 0.0259 |
| 16864839 | ZNF880       | zinc finger protein 880                                          | 0.4692 | 0.004  |
| 16865044 | MIR523       | microRNA 523                                                     | 0.3012 | 0.0128 |
| 16865080 | MIR518D      | microRNA 518d                                                    | 0.1877 | 0.0454 |
| 16865682 |              |                                                                  | 0.741  | 0.0001 |
| 16865714 | ZNF524       | zinc finger protein 524                                          | 0.2907 | 0.0156 |
| 16865900 | ZNF583       | zinc finger protein 583                                          | 0.448  | 0.0258 |
| 16865917 | ZNF471       | zinc finger protein 471                                          | 0.7851 | 0.0007 |
| 16865925 | ZFP28        | zinc finger protein 28 homolog (mouse)                           | 0.5088 | 0.0038 |
| 16866081 | ZIK1         | zinc finger protein interacting with K protein 1 homolog (mouse) | 0.456  | 0.0209 |
| 16866100 | ZNF211       | zinc finger protein 211                                          | 0.2871 | 0.0443 |
| 16866115 | ZSCAN4       | zinc finger and SCAN domain containing 4                         | 0.1777 | 0.018  |
| 16866179 | LOC100288490 | uncharacterized LOC100288490                                     | 0.2268 | 0.0091 |
| 16866203 | ZNF135       | zinc finger protein 135                                          | 0.5883 | 0.0006 |
| 16866221 | ZNF274       | zinc finger protein 274                                          | 0.4447 | 0.0025 |
| 16866246 |              |                                                                  | 0.4894 | 0.0359 |
| 16866435 | SHC2         | SHC (Src homology 2 domain containing) transforming protein 2    | 0.522  | 0.023  |
| 16866974 | GNG7         | guanine nucleotide binding protein (G protein), gamma 7          | 1.1844 | 0.0003 |
| 16866981 | DIRAS1       | DIRAS family, GTP-binding RAS-like 1                             | 0.8134 | 0.0005 |
| 16867278 | STAP2        | signal transducing adaptor family member 2                       | 1.1472 | 0.0003 |
| 16867784 | C3           | complement component 3                                           | 2.7669 | 0.0001 |
| 16867969 | PCP2         | Purkinje cell protein 2                                          | 0.1705 | 0.0357 |
| 16868158 | RAB11B-AS1   | RAB11B antisense RNA 1 (non-protein coding)                      | 0.4562 | 0.0208 |
| 16868397 | ZNF426       | zinc finger protein 426                                          | 0.655  | 0.0121 |



|          |              |                                                                                     |        |        |
|----------|--------------|-------------------------------------------------------------------------------------|--------|--------|
| 16868453 | ZNF812       | zinc finger protein 812                                                             | 0.3227 | 0.0422 |
| 16868462 | ZNF846       | zinc finger protein 846                                                             | 0.4321 | 0.0085 |
| 16868556 | ANGPTL6      | angiopoietin-like 6                                                                 | 0.2239 | 0.0044 |
| 16868920 | TMEM205      | transmembrane protein 205                                                           | 0.3448 | 0.0405 |
| 16868986 | ELAVL3       | ELAV (embryonic lethal, abnormal vision, Drosophila)-like 3 (Hu antigen C)          | 0.1515 | 0.0366 |
| 16869044 | ZNF433       | zinc finger protein 433                                                             | 0.2934 | 0.0084 |
| 16869126 | ZNF799       | zinc finger protein 799                                                             | 0.2751 | 0.0226 |
| 16869154 | ZNF709       | zinc finger protein 709                                                             | 0.2231 | 0.0461 |
| 16869427 | CACNA1A      | calcium channel, voltage-dependent, P/Q type, alpha 1A subunit                      | 0.3685 | 0.0192 |
| 16869660 | NDUFB7       | NADH dehydrogenase (ubiquinone) 1 beta subcomplex, 7, 18kDa                         | 0.2122 | 0.0419 |
| 16869713 | OR7A5        | olfactory receptor, family 7, subfamily A, member 5                                 | 0.9567 | 0.0058 |
| 16869891 | RASAL3       | RAS protein activator like 3                                                        | 0.2044 | 0.009  |
| 16869977 | CIB3         | calcium and integrin binding family member 3                                        | 0.2032 | 0.0415 |
| 16870200 | BST2         | bone marrow stromal cell antigen 2                                                  | 0.715  | 0.0006 |
| 16870274 | JAK3         | Janus kinase 3                                                                      | 0.8417 | 0      |
| 16870394 | LRRC25       | leucine rich repeat containing 25                                                   | 0.7526 | 0.0067 |
| 16870782 | ZNF737       | zinc finger protein 737                                                             | 0.7844 | 0.0094 |
| 16870815 | LOC100505594 | uncharacterized LOC100505594                                                        | 1.0477 | 0.0046 |
| 16870838 | ZNF208       | zinc finger protein 208                                                             | 0.6608 | 0.0009 |
| 16870854 | ZNF676       | zinc finger protein 676                                                             | 1.3921 | 0.0022 |
| 16870895 |              |                                                                                     | 0.1439 | 0.0365 |
| 16871031 |              |                                                                                     | 0.2469 | 0.0396 |
| 16871256 | RPS4XP21     | ribosomal protein S4X pseudogene 21                                                 | 0.1768 | 0.0023 |
| 16871268 |              |                                                                                     | 0.1557 | 0.0223 |
| 16871272 | ZNF599       | zinc finger protein 599                                                             | 0.3069 | 0.0167 |
| 16871467 | HSPB6        | heat shock protein, alpha-crystallin-related, B6                                    | 1.0482 | 0.0387 |
| 16871495 | NPHS1        | nephrosis 1, congenital, Finnish type (nephrin)                                     | 0.1622 | 0.0143 |
| 16871531 | NFKBID       | nuclear factor of kappa light polypeptide gene enhancer in B-cells inhibitor, delta | 0.1503 | 0.0353 |
| 16871622 | COX7A1       | cytochrome c oxidase subunit VIIa polypeptide 1 (muscle)                            | 0.9932 | 0.0107 |
| 16871642 | LOC100506930 | uncharacterized LOC100506930                                                        | 0.2623 | 0.0429 |
| 16871688 | ZNF529       | zinc finger protein 529                                                             | 0.4032 | 0.0154 |
| 16871698 | ZNF461       | zinc finger protein 461                                                             | 0.2745 | 0.0493 |
| 16871712 |              |                                                                                     | 0.3565 | 0.0314 |
| 16871740 | ZNF829       | zinc finger protein 829                                                             | 0.3048 | 0.0444 |
| 16871751 | ZNF585A      | zinc finger protein 585A                                                            | 0.3698 | 0.0122 |
| 16871781 |              |                                                                                     | 0.2581 | 0.0333 |
| 16871846 | ZNF607       | zinc finger protein 607                                                             | 0.5315 | 0.009  |
| 16871857 | ZNF573       | zinc finger protein 573                                                             | 0.2222 | 0.0343 |
| 16872163 |              |                                                                                     | 0.2876 | 0.0105 |
| 16872254 | DYRK1B       | dual-specificity tyrosine-(Y)-phosphorylation regulated kinase 1B                   | 0.2985 | 0.0278 |
| 16872447 | SERTAD3      | SERTA domain containing 3                                                           | 0.4101 | 0.0035 |
| 16872452 | BLVRB        | biliverdin reductase B (flavin reductase (NADPH))                                   | 0.6284 | 0.0057 |
| 16872561 | B9D2         | B9 protein domain 2                                                                 | 0.3832 | 0.0108 |
| 16872978 |              |                                                                                     | 0.1862 | 0.0132 |
| 16873007 | ETHE1        | ethylmalonic encephalopathy 1                                                       | 0.412  | 0.0173 |
| 16873049 | CADM4        | cell adhesion molecule 4                                                            | 0.5644 | 0.0065 |
| 16873143 |              |                                                                                     | 0.2133 | 0.0036 |
| 16873215 |              |                                                                                     | 0.2169 | 0.0301 |
| 16873507 | IGFL4        | IGF-like family member 4                                                            | 1.0086 | 0.0002 |
| 16873513 |              |                                                                                     | 0.8764 | 0.0055 |
| 16873528 | LOC645553    | uncharacterized LOC645553                                                           | 1.2288 | 0.0145 |
| 16873534 | CCDC8        | coiled-coil domain containing 8                                                     | 0.5646 | 0.0305 |
| 16873675 | BBC3         | BCL2 binding component 3                                                            | 0.2219 | 0.0128 |
| 16873767 | ZNF541       | zinc finger protein 541                                                             | 0.2443 | 0.0161 |
| 16873826 | PLA2G4C      | phospholipase A2, group IVC (cytosolic, calcium-independent)                        | 0.7135 | 0.015  |

|          |                    |                                                             |        |        |
|----------|--------------------|-------------------------------------------------------------|--------|--------|
| 16874005 | DBP                | D site of albumin promoter (albumin D-box) binding protein  | 0.6797 | 0.0096 |
| 16874012 | CA11               | carbonic anhydrase XI                                       | 1.1229 | 0.0093 |
| 16874097 | HSD17B14           | hydroxysteroid (17-beta) dehydrogenase 14                   | 1.1281 | 0.0058 |
| 16874267 |                    |                                                             | 0.3855 | 0.0261 |
| 16874467 | VRK3               | vaccinia related kinase 3                                   | 0.2164 | 0.0423 |
| 16874546 | NAPSA              | napsin A aspartic peptidase                                 | 0.2658 | 0.0284 |
| 16874558 | FAM71E1            | family with sequence similarity 71, member E1               | 0.4498 | 0.0154 |
| 16874641 | SNORD88B           | small nucleolar RNA, C/D box 88B                            | 0.509  | 0.0294 |
| 16874645 | SNORD88C           | small nucleolar RNA, C/D box 88C                            | 0.4472 | 0.0174 |
| 16874647 | KLK1               | kallikrein 1                                                | 1.1713 | 0.0309 |
| 16874656 | KLK15              | kallikrein-related peptidase 15                             | 0.4841 | 0.005  |
| 16874665 | KLKP1              | kallikrein pseudogene 1                                     | 0.9663 | 0.0009 |
| 16874672 | KLK4               | kallikrein-related peptidase 4                              | 2.1162 | 0.0002 |
| 16874683 | KLK5               | kallikrein-related peptidase 5                              | 0.1383 | 0.0192 |
| 16874811 | ETFB               | electron-transfer-flavoprotein, beta polypeptide            | 0.37   | 0.0146 |
| 16874828 | NKG7               | natural killer cell group 7 sequence                        | 0.6796 | 0.0006 |
| 16874890 | SIGLEC6            | sialic acid binding Ig-like lectin 6                        | 0.1973 | 0.0162 |
| 16874906 | FLJ30403           | uncharacterized LOC729975                                   | 0.2616 | 0.0148 |
| 16874911 | SIGLEC5            | sialic acid binding Ig-like lectin 5                        | 0.1847 | 0.0078 |
| 16874953 | ZNF577             | zinc finger protein 577                                     | 0.3417 | 0.0305 |
| 16874970 | ZNF649             | zinc finger protein 649                                     | 0.4442 | 0.0499 |
| 16875044 | LOC284373          | uncharacterized LOC284373                                   | 0.2307 | 0.0376 |
| 16875074 | ZNF611             | zinc finger protein 611                                     | 0.3689 | 0.0101 |
| 16875114 |                    |                                                             | 0.5931 | 0.0199 |
| 16875126 | ZNF816-<br>ZNF321P | ZNF816-ZNF321P readthrough                                  | 0.2057 | 0.0279 |
| 16875140 | ZNF702P            | zinc finger protein 702, pseudogene                         | 0.6119 | 0.0025 |
| 16875412 |                    |                                                             | 0.1081 | 0.043  |
| 16875873 | ZNF582             | zinc finger protein 582                                     | 0.4361 | 0.012  |
| 16875879 | LOC386758          | uncharacterized LOC386758                                   | 0.6177 | 0.0006 |
| 16875904 | ZNF835             | zinc finger protein 835                                     | 0.2662 | 0.0126 |
| 16876050 | ZNF418             | zinc finger protein 418                                     | 0.4471 | 0.0382 |
| 16876074 | ZNF606             | zinc finger protein 606                                     | 0.3174 | 0.0067 |
| 16876090 | ZSCAN18            | zinc finger and SCAN domain containing 18                   | 0.2444 | 0.0236 |
| 16876103 | ZNF329             | zinc finger protein 329                                     | 0.463  | 0.0033 |
| 16876147 | ZNF132             | zinc finger protein 132                                     | 0.5826 | 0.0099 |
| 16876182 | CHMP2A             | charged multivesicular body protein 2A                      | 0.1682 | 0.0458 |
| 16876200 | MZF1               | myeloid zinc finger 1                                       | 0.2502 | 0.0162 |
| 16876260 |                    |                                                             | 0.1622 | 0.0314 |
| 16876337 |                    |                                                             | 0.3695 | 0.0149 |
| 16876428 |                    |                                                             | 0.6225 | 0.0355 |
| 16876520 | SNTG2              | syntrophin, gamma 2                                         | 0.3372 | 0.0036 |
| 16876739 |                    |                                                             | 0.1105 | 0.0191 |
| 16876812 |                    |                                                             | 0.4241 | 0.0169 |
| 16877126 | C2orf50            | chromosome 2 open reading frame 50                          | 0.1856 | 0.0428 |
| 16877427 |                    |                                                             | 0.2562 | 0.0017 |
| 16877437 |                    |                                                             | 0.1306 | 0.0385 |
| 16877491 | MSGN1              | mesogenin 1                                                 | 0.1437 | 0.0316 |
| 16877527 |                    |                                                             | 0.1984 | 0.0353 |
| 16877987 | MAPRE3             | microtubule-associated protein, RP/EB family, member 3      | 0.4979 | 0.0029 |
| 16878081 | KHK                | ketohexokinase (fructokinase)                               | 0.4311 | 0.0449 |
| 16878406 | MRPL33             | mitochondrial ribosomal protein L33                         | 0.4154 | 0.0377 |
| 16878416 | BRE                | brain and reproductive organ-expressed (TNFRSF1A modulator) | 0.4045 | 0.0348 |
| 16878659 |                    |                                                             | 0.1641 | 0.0338 |
| 16879250 | GALM               | galactose mutarotase (aldose 1-epimerase)                   | 0.6674 | 0.0242 |
| 16879487 |                    |                                                             | 0.1441 | 0.0356 |
| 16879498 |                    |                                                             | 0.1848 | 0.0257 |

|          |              |                                                                                                                                                          |        |        |
|----------|--------------|----------------------------------------------------------------------------------------------------------------------------------------------------------|--------|--------|
| 16879601 | SLC3A1       | solute carrier family 3 (cystine, dibasic and neutral amino acid transporters, activator of cystine, dibasic and neutral amino acid transport), member 1 | 0.2182 | 0.0055 |
| 16879812 |              |                                                                                                                                                          | 0.1874 | 0.0294 |
| 16879863 | EPCAM        | epithelial cell adhesion molecule                                                                                                                        | 0.8289 | 0.0414 |
| 16879911 | LOC644093    | hCG2040054                                                                                                                                               | 0.1732 | 0.0381 |
| 16880054 |              |                                                                                                                                                          | 0.1359 | 0.0481 |
| 16880291 |              |                                                                                                                                                          | 0.2122 | 0.0173 |
| 16880648 |              |                                                                                                                                                          | 0.2345 | 0.011  |
| 16880663 |              |                                                                                                                                                          | 0.2131 | 0.008  |
| 16880682 | AFTPH        | aftiphilin                                                                                                                                               | 0.2207 | 0.0421 |
| 16880783 |              |                                                                                                                                                          | 0.1381 | 0.0113 |
| 16880911 |              |                                                                                                                                                          | 0.1248 | 0.0472 |
| 16880937 |              |                                                                                                                                                          | 0.1148 | 0.0364 |
| 16880977 | PROKR1       | prokineticin receptor 1                                                                                                                                  | 0.168  | 0.031  |
| 16881458 | NOTO         | notochord homeobox                                                                                                                                       | 0.162  | 0.0119 |
| 16881512 |              |                                                                                                                                                          | 0.156  | 0.0338 |
| 16881676 |              |                                                                                                                                                          | 0.1871 | 0.0493 |
| 16881678 | DCTN1-AS1    | DCTN1 antisense RNA 1 (non-protein coding)                                                                                                               | 0.1283 | 0.0481 |
| 16881818 | SEMA4F       | sema domain, immunoglobulin domain (Ig), transmembrane domain (TM) and short cytoplasmic domain, (semaphorin) 4F                                         | 0.1637 | 0.0259 |
| 16881902 |              |                                                                                                                                                          | 0.1434 | 0.0252 |
| 16881933 |              |                                                                                                                                                          | 0.1195 | 0.0214 |
| 16881951 | REG3G        | regenerating islet-derived 3 gamma                                                                                                                       | 0.4599 | 0.0453 |
| 16881977 | CTNNA2       | catenin (cadherin-associated protein), alpha 2                                                                                                           | 0.4438 | 0.039  |
| 16882028 |              |                                                                                                                                                          | 0.9798 | 0.0129 |
| 16882055 | FUNDC2P2     | FUN14 domain containing 2 pseudogene 2                                                                                                                   | 0.1854 | 0.0267 |
| 16882277 | VAMP8        | vesicle-associated membrane protein 8 (endobrevin)                                                                                                       | 0.6491 | 0.0223 |
| 16882285 | VAMP5        | vesicle-associated membrane protein 5 (myobrevin)                                                                                                        | 0.6897 | 0.0124 |
| 16882555 | IGKV3D-7     | immunoglobulin kappa variable 3D-7                                                                                                                       | 0.5204 | 0.0101 |
| 16882718 | IGKV2D-40    | immunoglobulin kappa variable 2D-40                                                                                                                      | 0.5346 | 0.0026 |
| 16882720 | IGKV1D-39    | immunoglobulin kappa variable 1D-39                                                                                                                      | 0.9715 | 0.0237 |
| 16882723 | IGKV1-37     | immunoglobulin kappa variable 1-37 (non-functional)                                                                                                      | 0.7128 | 0.0025 |
| 16882726 | IGKV1D-33    | immunoglobulin kappa variable 1D-33                                                                                                                      | 0.5339 | 0.0099 |
| 16882736 | IGKV2D-29    | immunoglobulin kappa variable 2D-29                                                                                                                      | 0.2885 | 0.0495 |
| 16882744 | IGKV1D-27    | immunoglobulin kappa variable 1D-27 (pseudogene)                                                                                                         | 0.5944 | 0.0048 |
| 16882750 | IGKV2D-24    | immunoglobulin kappa variable 2D-24 (non-functional)                                                                                                     | 0.8365 | 0.0488 |
| 16882759 | IGKV2D-24    | immunoglobulin kappa variable 2D-24 (non-functional)                                                                                                     | 0.5635 | 0.0345 |
| 16882770 | IGKV1D-16    | immunoglobulin kappa variable 1D-16                                                                                                                      | 0.5255 | 0.0338 |
| 16882774 | IGKV3D-15    | immunoglobulin kappa variable 3D-15 (gene/pseudogene)                                                                                                    | 0.7617 | 0.0157 |
| 16882786 | IGKV3D-11    | immunoglobulin kappa variable 3D-11                                                                                                                      | 0.7427 | 0.0005 |
| 16882801 | IGKV3D-7     | immunoglobulin kappa variable 3D-7                                                                                                                       | 0.4745 | 0.0039 |
| 16882834 | MAL          | mal, T-cell differentiation protein                                                                                                                      | 0.2223 | 0.0096 |
| 16883809 |              |                                                                                                                                                          | 0.159  | 0.0164 |
| 16883816 |              |                                                                                                                                                          | 0.147  | 0.048  |
| 16883840 |              |                                                                                                                                                          | 0.1628 | 0.0274 |
| 16884030 | SULT1C2      | sulfotransferase family, cytosolic, 1C, member 2                                                                                                         | 0.3129 | 0.0092 |
| 16884627 |              |                                                                                                                                                          | 0.377  | 0.0249 |
| 16884700 |              |                                                                                                                                                          | 0.4043 | 0.0016 |
| 16884790 |              |                                                                                                                                                          | 0.1998 | 0.0037 |
| 16884913 |              |                                                                                                                                                          | 0.1767 | 0.0194 |
| 16885279 |              |                                                                                                                                                          | 0.1821 | 0.0359 |
| 16885285 |              |                                                                                                                                                          | 0.1995 | 0.002  |
| 16885629 | GPR148       | G protein-coupled receptor 148                                                                                                                           | 0.1685 | 0.0274 |
| 16885819 |              |                                                                                                                                                          | 0.3789 | 0.0337 |
| 16886041 | LOC100507600 | uncharacterized LOC100507600                                                                                                                             | 0.1836 | 0.0312 |
| 16886105 | HNMT         | histamine N-methyltransferase                                                                                                                            | 0.6497 | 0.0191 |
| 16886154 | LOC647012    | YY1 transcription factor pseudogene                                                                                                                      | 0.192  | 0.0051 |
| 16886160 |              |                                                                                                                                                          | 0.3018 | 0.003  |

|          |              |                                                                                                |        |        |
|----------|--------------|------------------------------------------------------------------------------------------------|--------|--------|
| 16886165 |              |                                                                                                | 0.2734 | 0.0179 |
| 16886168 |              |                                                                                                | 0.504  | 0.003  |
| 16886174 | KYNU         | kynureninase                                                                                   | 0.3712 | 0.0436 |
| 16886240 |              |                                                                                                | 0.1803 | 0.0058 |
| 16886329 |              |                                                                                                | 0.1213 | 0.0453 |
| 16886448 | LYPD6        | LY6/PLAUR domain containing 6                                                                  | 0.1755 | 0.0226 |
| 16886717 | GALNT5       | UDP-N-acetyl-alpha-D-galactosamine:polypeptide N-acetylgalactosaminyltransferase 5 (GalNAc-T5) | 0.2976 | 0.0355 |
| 16886734 |              |                                                                                                | 0.3741 | 0.0007 |
| 16886736 | UPP2         | uridine phosphorylase 2                                                                        | 0.134  | 0.0349 |
| 16886748 | UPP2-IT1     | UPP2 intronic transcript 1 (non-protein coding)                                                | 0.1071 | 0.0488 |
| 16886751 | CCDC148-AS1  | CCDC148 antisense RNA 1 (non-protein coding)                                                   | 0.206  | 0.0238 |
| 16886802 |              |                                                                                                | 0.1332 | 0.0406 |
| 16887014 | GCA          | grancalcin, EF-hand calcium binding protein                                                    | 0.3941 | 0.0069 |
| 16887049 |              |                                                                                                | 0.334  | 0.0093 |
| 16887062 | SCN2A        | sodium channel, voltage-gated, type II, alpha subunit                                          | 0.2844 | 0.0248 |
| 16887192 | MIR4774      | microRNA 4774                                                                                  | 0.233  | 0.04   |
| 16887332 |              |                                                                                                | 0.2013 | 0.037  |
| 16887417 |              |                                                                                                | 0.1534 | 0.0255 |
| 16887482 |              |                                                                                                | 0.1142 | 0.032  |
| 16887586 |              |                                                                                                | 0.1556 | 0.0094 |
| 16887675 | DLX1         | distal-less homeobox 1                                                                         | 0.1701 | 0.0494 |
| 16888080 |              |                                                                                                | 0.4327 | 0.0173 |
| 16888211 |              |                                                                                                | 0.3329 | 0.0315 |
| 16888216 |              |                                                                                                | 0.6111 | 0.0063 |
| 16888222 | LOC100506905 | uncharacterized LOC100506905                                                                   | 0.3005 | 0.0114 |
| 16888349 | PPP1R1C      | protein phosphatase 1, regulatory (inhibitor) subunit 1C                                       | 0.4694 | 0.0314 |
| 16888365 | RN5S113      | RNA, 5S ribosomal 113                                                                          | 0.2902 | 0.0039 |
| 16888403 |              |                                                                                                | 0.3664 | 0.0044 |
| 16888433 |              |                                                                                                | 0.1208 | 0.0441 |
| 16888437 | ZNF804A      | zinc finger protein 804A                                                                       | 0.2105 | 0.0099 |
| 16888822 | MFSD6        | major facilitator superfamily domain containing 6                                              | 0.7473 | 0.0006 |
| 16888905 |              |                                                                                                | 0.1525 | 0.0184 |
| 16889011 |              |                                                                                                | 0.3789 | 0.0089 |
| 16889160 | PLCL1        | phospholipase C-like 1                                                                         | 1.1946 | 0.0025 |
| 16889819 | CTLA4        | cytotoxic T-lymphocyte-associated protein 4                                                    | 0.205  | 0.0254 |
| 16890207 | MAP2         | microtubule-associated protein 2                                                               | 0.5454 | 0.0478 |
| 16890347 | CPS1         | carbamoyl-phosphate synthase 1, mitochondrial                                                  | 0.6529 | 0.009  |
| 16890417 | MIR4776-1    | microRNA 4776-1                                                                                | 0.2491 | 0.0235 |
| 16890530 |              |                                                                                                | 0.1987 | 0.001  |
| 16890540 |              |                                                                                                | 0.1864 | 0.0056 |
| 16890566 | TMEM169      | transmembrane protein 169                                                                      | 0.1625 | 0.01   |
| 16891082 | CYP27A1      | cytochrome P450, family 27, subfamily A, polypeptide 1                                         | 0.931  | 0.0055 |
| 16891529 |              |                                                                                                | 0.1083 | 0.0219 |
| 16891546 | LOC100507800 | uncharacterized LOC100507800                                                                   | 0.3214 | 0.0146 |
| 16891553 |              |                                                                                                | 0.1105 | 0.0482 |
| 16891555 | SGPP2        | sphingosine-1-phosphate phosphatase 2                                                          | 2.0251 | 0      |
| 16891562 |              |                                                                                                | 0.2615 | 0.0002 |
| 16891833 |              |                                                                                                | 0.186  | 0.0014 |
| 16892354 |              |                                                                                                | 0.201  | 0.0364 |
| 16892446 | INPP5D       | inositol polyphosphate-5-phosphatase, 145kDa                                                   | 0.4794 | 0.0054 |
| 16892601 | UGT1A9       | UDP glucuronosyltransferase 1 family, polypeptide A9                                           | 0.3631 | 0.0077 |
| 16892774 |              |                                                                                                | 0.1715 | 0.0189 |
| 16892777 |              |                                                                                                | 0.1087 | 0.0289 |
| 16893119 |              |                                                                                                | 0.1454 | 0.0403 |
| 16893272 | AQP12A       | aquaporin 12A                                                                                  | 0.1662 | 0.0205 |
| 16893941 |              |                                                                                                | 0.462  | 0.0024 |
| 16894031 | LOC100505964 | uncharacterized LOC100505964                                                                   | 0.1271 | 0.0411 |
| 16894053 |              |                                                                                                | 0.2347 | 0.0146 |
| 16894402 | ODC1         | ornithine decarboxylase 1                                                                      | 0.6545 | 0.0105 |
| 16894422 | SNORA80B     | small nucleolar RNA, H/ACA box 80B                                                             | 0.2584 | 0.0377 |

|          |              |                                                                                        |        |        |
|----------|--------------|----------------------------------------------------------------------------------------|--------|--------|
| 16894555 | MIR4429      | microRNA 4429                                                                          | 0.2029 | 0.0195 |
| 16894693 |              |                                                                                        | 0.159  | 0.0027 |
| 16894710 | FAM49A       | family with sequence similarity 49, member A                                           | 0.6967 | 0.0195 |
| 16894810 | FLJ41481     | uncharacterized LOC400945                                                              | 0.2818 | 0.0359 |
| 16894848 | WDR35        | WD repeat domain 35                                                                    | 0.3513 | 0.0235 |
| 16894905 |              |                                                                                        | 0.1159 | 0.0238 |
| 16894908 |              |                                                                                        | 0.2402 | 0.038  |
| 16895429 |              |                                                                                        | 0.217  | 0.0169 |
| 16895712 | SLC30A3      | solute carrier family 30 (zinc transporter), member 3                                  | 0.2292 | 0.0198 |
| 16895739 | UCN          | urocortin                                                                              | 0.2827 | 0.0026 |
| 16895871 | IFT172       | intraflagellar transport 172 homolog (Chlamydomonas)                                   | 0.447  | 0.0004 |
| 16895954 | CCDC121      | coiled-coil domain containing 121                                                      | 0.3343 | 0.0044 |
| 16895979 |              |                                                                                        | 0.3041 | 0.0139 |
| 16895982 | RBKS         | ribokinase                                                                             | 0.4313 | 0.0389 |
| 16896100 |              |                                                                                        | 0.1512 | 0.0149 |
| 16896617 |              |                                                                                        | 0.2865 | 0.0128 |
| 16896647 |              |                                                                                        | 0.3181 | 0.0231 |
| 16897215 |              |                                                                                        | 0.2418 | 0.0033 |
| 16897218 |              |                                                                                        | 0.2251 | 0.0391 |
| 16897338 |              |                                                                                        | 0.266  | 0.0264 |
| 16897664 |              |                                                                                        | 0.2275 | 0.0401 |
| 16897872 | LOC100129434 | uncharacterized LOC100129434                                                           | 0.1731 | 0.0343 |
| 16897938 | MIR4432      | microRNA 4432                                                                          | 0.3183 | 0      |
| 16897967 | FLJ16341     | uncharacterized LOC400957                                                              | 0.1305 | 0.0325 |
| 16898323 |              |                                                                                        | 0.1695 | 0.0048 |
| 16898369 |              |                                                                                        | 0.1239 | 0.0351 |
| 16898375 | LOC400958    | uncharacterized LOC400958                                                              | 0.3052 | 0.0013 |
| 16898461 |              |                                                                                        | 0.1999 | 0.0475 |
| 16898657 |              |                                                                                        | 0.1767 | 0.0389 |
| 16898788 | TGFA         | transforming growth factor, alpha                                                      | 0.1649 | 0.0217 |
| 16898804 | ADD2         | adducin 2 (beta)                                                                       | 0.294  | 0.0002 |
| 16899378 | C2orf65      | chromosome 2 open reading frame 65                                                     | 0.3009 | 0.009  |
| 16899394 |              |                                                                                        | 0.2189 | 0.0212 |
| 16899474 |              |                                                                                        | 0.2186 | 0.0463 |
| 16899482 |              |                                                                                        | 0.1637 | 0.0192 |
| 16899525 |              |                                                                                        | 0.344  | 0.0022 |
| 16899529 |              |                                                                                        | 0.8123 | 0.0224 |
| 16899533 | LRRTM1       | leucine rich repeat transmembrane neuronal 1                                           | 0.3311 | 0.0314 |
| 16899543 |              |                                                                                        | 0.3931 | 0.001  |
| 16899682 |              |                                                                                        | 0.3849 | 0.0071 |
| 16899943 | CD8B         | CD8b molecule                                                                          | 0.1856 | 0.0019 |
| 16900044 | RNY4P15      | RNA, Ro-associated Y4 pseudogene 15                                                    | 0.2501 | 0.0095 |
| 16900096 | IGK@         | immunoglobulin kappa locus                                                             | 1.2809 | 0.023  |
| 16900104 | IGKV1-6      | immunoglobulin kappa variable 1-6                                                      | 0.9539 | 0.0268 |
| 16900128 | IGKV3-15     | immunoglobulin kappa variable 3-15                                                     | 0.4924 | 0.0285 |
| 16900136 | IGKC         | immunoglobulin kappa constant                                                          | 1.1244 | 0.0103 |
| 16900148 | IGKV2-24     | immunoglobulin kappa variable 2-24                                                     | 0.7795 | 0.0158 |
| 16900152 | IGKV1-27     | immunoglobulin kappa variable 1-27                                                     | 0.6556 | 0.0246 |
| 16900160 | IGKV2-29     | immunoglobulin kappa variable 2-29 (gene/pseudogene)                                   | 0.3014 | 0.0198 |
| 16900166 | IGKC         | immunoglobulin kappa constant                                                          | 0.5507 | 0.0156 |
| 16900178 | IGKV2-40     | immunoglobulin kappa variable 2-40                                                     | 0.6614 | 0.0191 |
| 16900180 | IGKV3D-7     | immunoglobulin kappa variable 3D-7                                                     | 0.8008 | 0.0192 |
| 16900238 | LOC100131662 | uncharacterized LOC100131662                                                           | 0.1304 | 0.0281 |
| 16900283 |              |                                                                                        | 0.2499 | 0.0405 |
| 16900875 | MGAT4A       | mannosyl (alpha-1,3-)-glycoprotein beta-1,4-N-acetylglucosaminyltransferase, isozyme A | 0.7836 | 0.0011 |
| 16900902 |              |                                                                                        | 0.2273 | 0.0113 |
| 16901278 |              |                                                                                        | 0.1447 | 0.0406 |
| 16901327 | LOC284998    | uncharacterized LOC284998                                                              | 0.1252 | 0.0421 |
| 16901427 | UXS1         | UDP-glucuronate decarboxylase 1                                                        | 0.374  | 0.0154 |

|          |              |                                                                          |        |        |
|----------|--------------|--------------------------------------------------------------------------|--------|--------|
| 16901632 | NPHP1        | nephronophthisis 1 (juvenile)                                            | 0.3575 | 0.0038 |
| 16902128 |              |                                                                          | 0.1547 | 0.047  |
| 16902387 |              |                                                                          | 0.269  | 0.0157 |
| 16902390 |              |                                                                          | 0.2962 | 0.0113 |
| 16902398 |              |                                                                          | 0.1835 | 0.0127 |
| 16902670 |              |                                                                          | 0.1865 | 0.0072 |
| 16902690 | LOC440905    | uncharacterized LOC440905                                                | 0.3389 | 0.009  |
| 16902975 |              |                                                                          | 0.2212 | 0.0069 |
| 16903186 | LRP1B        | low density lipoprotein receptor-related protein 1B                      | 0.7266 | 0.0287 |
| 16903400 |              |                                                                          | 0.1789 | 0.0246 |
| 16903409 |              |                                                                          | 0.1256 | 0.0462 |
| 16903966 |              |                                                                          | 0.486  | 0.0145 |
| 16903991 | CCDC148      | coiled-coil domain containing 148                                        | 0.5072 | 0.0002 |
| 16904365 | IFIH1        | interferon induced with helicase C domain 1                              | 0.286  | 0.017  |
| 16904419 |              |                                                                          | 0.161  | 0.0255 |
| 16904974 |              |                                                                          | 0.1644 | 0.004  |
| 16905106 |              |                                                                          | 0.1052 | 0.041  |
| 16905289 |              |                                                                          | 0.2088 | 0.0253 |
| 16905425 |              |                                                                          | 0.1157 | 0.0228 |
| 16905528 | PDE11A       | phosphodiesterase 11A                                                    | 0.5772 | 0.0279 |
| 16905600 | TTN          | titin                                                                    | 0.5538 | 0.018  |
| 16906031 | ZNF385B      | zinc finger protein 385B                                                 | 1.8131 | 0      |
| 16906419 | SLC40A1      | solute carrier family 40 (iron-regulated transporter), member 1          | 0.6159 | 0.0488 |
| 16906571 | STAT4        | signal transducer and activator of transcription 4                       | 0.3006 | 0.0069 |
| 16906607 |              |                                                                          | 0.1286 | 0.0366 |
| 16906651 |              |                                                                          | 0.1367 | 0.0292 |
| 16906656 | DNAH7        | dynein, axonemal, heavy chain 7                                          | 0.6577 | 0.0021 |
| 16906733 | STK17B       | serine/threonine kinase 17b                                              | 0.4184 | 0.0348 |
| 16906790 |              |                                                                          | 0.1984 | 0.0097 |
| 16906795 | LOC100130452 | uncharacterized LOC100130452                                             | 0.149  | 0.0227 |
| 16907324 | MPP4         | membrane protein, palmitoylated 4 (MAGUK p55 subfamily member 4)         | 0.1774 | 0.0153 |
| 16907401 |              |                                                                          | 0.3439 | 0.0225 |
| 16907572 | GPR1         | G protein-coupled receptor 1                                             | 0.6077 | 0.0161 |
| 16907739 | CRYGA        | crystallin, gamma A                                                      | 0.1526 | 0.0223 |
| 16907812 | ACADL        | acyl-CoA dehydrogenase, long chain                                       | 1.1787 | 0.0361 |
| 16907843 | LANCL1       | LanC lantibiotic synthetase component C-like 1 (bacterial)               | 0.3119 | 0.0331 |
| 16907863 | ERBB4        | v-erb-a erythroblastic leukemia viral oncogene homolog 4 (avian)         | 0.207  | 0.0399 |
| 16908220 |              |                                                                          | 0.1238 | 0.016  |
| 16908977 | SCG2         | secretogranin II                                                         | 1.3888 | 0.0038 |
| 16909401 | SLC16A14     | solute carrier family 16, member 14 (monocarboxylic acid transporter 14) | 0.6633 | 0.0058 |
| 16909939 | LOC151174    | uncharacterized LOC151174                                                | 0.1767 | 0.0344 |
| 16910580 | DEFB127      | defensin, beta 127                                                       | 0.1764 | 0.0122 |
| 16910618 | RBCK1        | RanBP-type and C3HC4-type zinc finger containing 1                       | 0.2516 | 0.0186 |
| 16910801 | TMC2         | transmembrane channel-like 2                                             | 0.1618 | 0.0057 |
| 16910888 | PTPRA        | protein tyrosine phosphatase, receptor type, A                           | 0.4967 | 0      |
| 16911077 | MAVS         | mitochondrial antiviral signaling protein                                | 0.288  | 0.0276 |
| 16911132 | PRNP         | prion protein                                                            | 0.3568 | 0.0481 |
| 16911139 | PRND         | prion protein 2 (dublet)                                                 | 0.1753 | 0.0445 |
| 16911151 | CDS2         | CDP-diacylglycerol synthase (phosphatidate cytidyltransferase) 2         | 0.4362 | 0.0016 |
| 16911187 | C20orf196    | chromosome 20 open reading frame 196                                     | 0.3391 | 0.0349 |
| 16911201 | CHGB         | chromogranin B (secretogranin 1)                                         | 1.1245 | 0.0127 |
| 16911257 |              |                                                                          | 0.3409 | 0.0423 |
| 16911261 | BMP2         | bone morphogenetic protein 2                                             | 0.5131 | 0.0075 |
| 16911271 |              |                                                                          | 0.171  | 0.0188 |
| 16911338 | PLCB4        | phospholipase C, beta 4                                                  | 0.5473 | 0.0047 |
| 16911391 |              |                                                                          | 0.1996 | 0.0254 |

|          |          |                                                                                          |        |        |
|----------|----------|------------------------------------------------------------------------------------------|--------|--------|
| 16911394 | ANKRD5   | ankyrin repeat domain 5                                                                  | 0.6243 | 0.0079 |
| 16911411 |          |                                                                                          | 0.2246 | 0.0026 |
| 16911432 | C20orf94 | chromosome 20 open reading frame 94                                                      | 0.2631 | 0.0179 |
| 16911493 | SPTLC3   | serine palmitoyltransferase, long chain base subunit 3                                   | 1.0995 | 0.0003 |
| 16911525 | NDUFAF5  | NADH dehydrogenase (ubiquinone) complex I, assembly factor 5                             | 0.2818 | 0.0283 |
| 16911605 | SNRPB2   | small nuclear ribonucleoprotein polypeptide B                                            | 0.3817 | 0.0039 |
| 16911632 | PCSK2    | proprotein convertase subtilisin/kexin type 2                                            | 0.7864 | 0.0004 |
| 16911651 | DSTN     | destrin (actin depolymerizing factor)                                                    | 0.3271 | 0.008  |
| 16911698 | CSRP2BP  | CSRP2 binding protein                                                                    | 0.5243 | 0.0106 |
| 16911783 | DTD1     | D-tyrosyl-tRNA deacylase 1 homolog ( <i>S. cerevisiae</i> )                              | 0.5201 | 0.014  |
| 16911797 | C20orf79 | chromosome 20 open reading frame 79                                                      | 0.1128 | 0.0202 |
| 16911835 | RIN2     | Ras and Rab interactor 2                                                                 | 0.2974 | 0.0216 |
| 16911853 | NAA20    | N(alpha)-acetyltransferase 20, NatB catalytic subunit                                    | 0.3245 | 0.0175 |
| 16911920 |          |                                                                                          | 0.222  | 0.0101 |
| 16912016 |          |                                                                                          | 0.1941 | 0.0011 |
| 16912090 |          |                                                                                          | 0.2335 | 0.0023 |
| 16912109 | FLJ33581 | uncharacterized LOC400839                                                                | 0.1836 | 0.0211 |
| 16912130 | CST7     | cystatin F (leukocystatin)                                                               | 0.2502 | 0.024  |
| 16912140 | ENTPD6   | ectonucleoside triphosphate diphosphohydrolase 6 (putative)                              | 0.3345 | 0.0152 |
| 16912224 |          |                                                                                          | 0.9993 | 0.0002 |
| 16912264 |          |                                                                                          | 0.1109 | 0.0493 |
| 16912290 | DEFB115  | defensin, beta 115                                                                       | 0.1951 | 0.0456 |
| 16912362 | ID1      | inhibitor of DNA binding 1, dominant negative helix-loop-helix protein                   | 0.7302 | 0.0091 |
| 16912376 |          |                                                                                          | 0.359  | 0.0384 |
| 16912445 |          |                                                                                          | 0.2657 | 0.0448 |
| 16912535 | KIF3B    | kinesin family member 3B                                                                 | 0.4403 | 0.0002 |
| 16912549 |          |                                                                                          | 0.2061 | 0.0212 |
| 16912818 | CBFA2T2  | core-binding factor, runt domain, alpha subunit 2; translocated to, 2                    | 0.1909 | 0.0404 |
| 16912871 | CHMP4B   | charged multivesicular body protein 4B                                                   | 0.4128 | 0.0013 |
| 16912900 | ASIP     | agouti signaling protein                                                                 | 0.3529 | 0.0137 |
| 16912954 | MAP1LC3A | microtubule-associated protein 1 light chain 3 alpha                                     | 0.3837 | 0.0019 |
| 16913063 | MIR499A  | microRNA 499a                                                                            | 0.1472 | 0.0443 |
| 16913095 | CEP250   | centrosomal protein 250kDa                                                               | 0.2448 | 0.0169 |
| 16913206 | PHF20    | PHD finger protein 20                                                                    | 0.2546 | 0.0259 |
| 16913456 | CTNBL1   | catenin, beta like 1                                                                     | 0.2464 | 0.0413 |
| 16913574 | RALGAPB  | Ral GTPase activating protein, beta subunit (non-catalytic)                              | 0.2468 | 0.0212 |
| 16913627 | ARHGAP40 | Rho GTPase activating protein 40                                                         | 0.1797 | 0.0164 |
| 16913737 | TOP1     | topoisomerase (DNA) I                                                                    | 0.2705 | 0.0354 |
| 16913854 |          |                                                                                          | 0.1079 | 0.0094 |
| 16914012 | GDAP1L1  | ganglioside induced differentiation associated protein 1-like 1                          | 0.1825 | 0.0487 |
| 16914070 | PKIG     | protein kinase (cAMP-dependent, catalytic) inhibitor gamma                               | 0.4266 | 0.0228 |
| 16914084 | WISP2    | WNT1 inducible signaling pathway protein 2                                               | 1.0478 | 0.0017 |
| 16914103 | YWHAB    | tyrosine 3-monooxygenase/tryptophan 5-monooxygenase activation protein, beta polypeptide | 0.2455 | 0.0075 |
| 16914183 | SEMG1    | semenogelin I                                                                            | 1.3783 | 0.001  |
| 16914213 | DBNDD2   | dysbindin (dystrobrevin binding protein 1) domain containing 2                           | 0.2095 | 0.0316 |
| 16914264 | WFDC2    | WAP four-disulfide core domain 2                                                         | 0.2302 | 0.0061 |
| 16914297 | DNTTIP1  | deoxynucleotidyltransferase, terminal, interacting protein 1                             | 0.287  | 0.0101 |
| 16914345 | ZSWIM1   | zinc finger, SWIM-type containing 1                                                      | 0.267  | 0.0231 |
| 16914352 | CTSA     | cathepsin A                                                                              | 0.6654 | 0.0004 |
| 16914414 | SLC12A5  | solute carrier family 12 (potassium/chloride transporter), member 5                      | 0.3305 | 0.0334 |
| 16914478 | EYA2     | eyes absent homolog 2 ( <i>Drosophila</i> )                                              | 0.5934 | 0.0014 |

|          |              |                                                                                         |        |        |
|----------|--------------|-----------------------------------------------------------------------------------------|--------|--------|
| 16914844 | PTPN1        | protein tyrosine phosphatase, non-receptor type 1                                       | 0.3005 | 0.0296 |
| 16914867 | PARD6B       | par-6 partitioning defective 6 homolog beta (C. elegans)                                | 0.6417 | 0.0068 |
| 16914888 | MOCS3        | molybdenum cofactor synthesis 3                                                         | 0.3528 | 0.0242 |
| 16914903 |              |                                                                                         | 0.1804 | 0.0348 |
| 16914941 |              |                                                                                         | 0.3188 | 0.0316 |
| 16914972 | DOK5         | docking protein 5                                                                       | 0.3283 | 0.0102 |
| 16914986 |              |                                                                                         | 0.2421 | 0.0003 |
| 16914996 |              |                                                                                         | 1.0631 | 0.0009 |
| 16914999 |              |                                                                                         | 0.4384 | 0.0048 |
| 16915003 |              |                                                                                         | 0.7536 | 0.0002 |
| 16915006 | MC3R         | melanocortin 3 receptor                                                                 | 0.5868 | 0.0008 |
| 16915044 | C20orf43     | chromosome 20 open reading frame 43                                                     | 0.2333 | 0.0344 |
| 16915211 |              |                                                                                         | 0.1783 | 0.0334 |
| 16915260 |              |                                                                                         | 0.1061 | 0.0157 |
| 16915448 | FAM217B      | family with sequence similarity 217, member B                                           | 0.3346 | 0.0353 |
| 16915671 | LOC100506553 | uncharacterized LOC100506553                                                            | 0.2028 | 0.0066 |
| 16915755 | OGFR         | opioid growth factor receptor                                                           | 0.2341 | 0.0463 |
| 16915866 | MIR124-3     | microRNA 124-3                                                                          | 0.1579 | 0.0232 |
| 16915868 | BIRC7        | baculoviral IAP repeat containing 7                                                     | 0.8662 | 0.0422 |
| 16915993 | PPDPF        | pancreatic progenitor cell differentiation and proliferation factor homolog (zebrafish) | 1.0854 | 0.0002 |
| 16916146 | DNAJC5       | DnaJ (Hsp40) homolog, subfamily C, member 5                                             | 0.2065 | 0.0364 |
| 16916289 | C20orf96     | chromosome 20 open reading frame 96                                                     | 0.5395 | 0.0015 |
| 16916304 | LOC100507459 | uncharacterized LOC100507459                                                            | 0.3495 | 0.0085 |
| 16916328 | CSNK2A1P     | casein kinase 2, alpha 1 polypeptide pseudogene                                         | 0.2788 | 0.0095 |
| 16916352 | SRXN1        | sulfiredoxin 1                                                                          | 0.445  | 0.0337 |
| 16916544 |              |                                                                                         | 0.141  | 0.0048 |
| 16916574 | IDH3B        | isocitrate dehydrogenase 3 (NAD+) beta                                                  | 0.4896 | 0.0013 |
| 16916712 | C20orf194    | chromosome 20 open reading frame 194                                                    | 0.3288 | 0.0239 |
| 16916882 |              |                                                                                         | 0.134  | 0.0274 |
| 16916946 | TMEM230      | transmembrane protein 230                                                               | 0.3775 | 0.0098 |
| 16916988 | LOC149837    | uncharacterized LOC149837                                                               | 0.3503 | 0.0421 |
| 16916996 |              |                                                                                         | 0.1557 | 0.0443 |
| 16917004 | GPCPD1       | glycerophosphocholine phosphodiesterase GDE1 homolog (S. cerevisiae)                    | 0.5956 | 0.0118 |
| 16917054 | LRRN4        | leucine rich repeat neuronal 4                                                          | 0.1983 | 0.0331 |
| 16917061 | FERMT1       | fermitin family member 1                                                                | 0.7214 | 0.0096 |
| 16917082 |              |                                                                                         | 0.1157 | 0.0447 |
| 16917114 | TMX4         | thioredoxin-related transmembrane protein 4                                             | 0.78   | 0.0002 |
| 16917139 | PAK7         | p21 protein (Cdc42/Rac)-activated kinase 7                                              | 0.6548 | 0.0395 |
| 16917173 | MKKS         | McKusick-Kaufman syndrome                                                               | 0.443  | 0.0037 |
| 16917247 |              |                                                                                         | 0.2444 | 0.0167 |
| 16917262 |              |                                                                                         | 0.1838 | 0.004  |
| 16917281 |              |                                                                                         | 0.2524 | 0.0276 |
| 16917449 | BFSP1        | beaded filament structural protein 1, filensin                                          | 0.5139 | 0.0016 |
| 16917468 | RRBP1        | ribosome binding protein 1 homolog 180kDa (dog)                                         | 0.3341 | 0.0468 |
| 16917652 | LOC100287166 | uncharacterized LOC100287166                                                            | 0.1867 | 0.0046 |
| 16917655 | CRNKL1       | crooked neck pre-mRNA splicing factor-like 1 (Drosophila)                               | 0.4472 | 0.0007 |
| 16917689 | RALGAPA2     | Ral GTPase activating protein, alpha subunit 2 (catalytic)                              | 0.7848 | 0.0001 |
| 16917874 |              |                                                                                         | 0.1716 | 0.0171 |
| 16917939 | CST3         | cystatin C                                                                              | 0.5225 | 0.0027 |
| 16918049 | VSX1         | visual system homeobox 1                                                                | 0.2255 | 0.0357 |
| 16918077 | ABHD12       | abhydrolase domain containing 12                                                        | 0.498  | 0.0007 |
| 16918244 | BCL2L1       | BCL2-like 1                                                                             | 0.495  | 0.012  |
| 16918351 | COMMMD7      | COMM domain containing 7                                                                | 0.2739 | 0.0116 |
| 16918363 | SUN5         | Sad1 and UNC84 domain containing 5                                                      | 0.195  | 0.0109 |
| 16918481 |              |                                                                                         | 0.2647 | 0.0405 |
| 16918522 | PIGU         | phosphatidylinositol glycan anchor biosynthesis, class U                                | 0.3641 | 0.0276 |
| 16918546 | NCOA6        | nuclear receptor coactivator 6                                                          | 0.2634 | 0.0485 |



|          |              |                                                                                       |        |        |
|----------|--------------|---------------------------------------------------------------------------------------|--------|--------|
| 16918609 | TRPC4AP      | transient receptor potential cation channel, subfamily C, member 4 associated protein | 0.3263 | 0.0073 |
| 16918656 |              |                                                                                       | 0.1112 | 0.0434 |
| 16918683 | MT1P3        | metallothionein 1 pseudogene 3                                                        | 0.5989 | 0.0224 |
| 16918732 |              |                                                                                       | 0.2133 | 0.0119 |
| 16918918 | LOC647979    | uncharacterized LOC647979                                                             | 0.3153 | 0.0323 |
| 16918953 | NDRG3        | NDRG family member 3                                                                  | 0.4595 | 0.0011 |
| 16919022 | SAMHD1       | SAM domain and HD domain 1                                                            | 0.7563 | 0.0027 |
| 16919225 | SNORA71A     | small nucleolar RNA, H/ACA box 71A                                                    | 0.7519 | 0.0273 |
| 16919436 |              |                                                                                       | 0.1423 | 0.042  |
| 16919448 | SERINC3      | serine incorporator 3                                                                 | 0.3019 | 0.0051 |
| 16919500 | RIMS4        | regulating synaptic membrane exocytosis 4                                             | 0.2465 | 0.0007 |
| 16919547 | SLPI         | secretory leukocyte peptidase inhibitor                                               | 2.8764 | 0.0014 |
| 16919692 | SPATA25      | spermatogenesis associated 25                                                         | 0.3062 | 0.0015 |
| 16919697 | NEURL2       | neuralized homolog 2 (Drosophila)                                                     | 0.612  | 0.0026 |
| 16919769 | NCOA5        | nuclear receptor coactivator 5                                                        | 0.3285 | 0.0165 |
| 16919828 | ELMO2        | engulfment and cell motility 2                                                        | 0.2105 | 0.0288 |
| 16919864 | ZNF334       | zinc finger protein 334                                                               | 0.4377 | 0.0286 |
| 16919906 | TP53RK       | TP53 regulating kinase                                                                | 0.4042 | 0.0362 |
| 16920018 |              |                                                                                       | 0.1512 | 0.0221 |
| 16920029 |              |                                                                                       | 0.2118 | 0.0038 |
| 16920031 |              |                                                                                       | 0.1529 | 0.0299 |
| 16920091 |              |                                                                                       | 0.1678 | 0.0099 |
| 16920100 | STAU1        | staufen, RNA binding protein, homolog 1 (Drosophila)                                  | 0.2966 | 0.0109 |
| 16920121 | ZNFX1        | zinc finger, NFX1-type containing 1                                                   | 0.2759 | 0.0074 |
| 16920454 | ZNF217       | zinc finger protein 217                                                               | 0.7215 | 0.0009 |
| 16920473 | SUMO1P1      | SUMO1 pseudogene 1                                                                    | 0.1535 | 0.031  |
| 16920524 |              |                                                                                       | 0.2483 | 0.0086 |
| 16920531 | CBLN4        | cerebellin 4 precursor                                                                | 1.0119 | 0.0003 |
| 16920537 |              |                                                                                       | 0.5873 | 0.0014 |
| 16920542 | RN5S487      | RNA, 5S ribosomal 487                                                                 | 0.3583 | 0.0008 |
| 16920544 |              |                                                                                       | 1.0968 | 0.0001 |
| 16920579 |              |                                                                                       | 0.2264 | 0.0085 |
| 16920861 |              |                                                                                       | 0.1626 | 0.0251 |
| 16920931 |              |                                                                                       | 0.1891 | 0.0008 |
| 16920939 | LAMA5        | laminin, alpha 5                                                                      | 0.3987 | 0.0029 |
| 16921123 | TCFL5        | transcription factor-like 5 (basic helix-loop-helix)                                  | 0.5071 | 0.0008 |
| 16921368 | C20orf181    | chromosome 20 open reading frame 181                                                  | 0.2224 | 0.0465 |
| 16921527 | RBM11        | RNA binding motif protein 11                                                          | 0.3295 | 0.0459 |
| 16921714 |              |                                                                                       | 0.1414 | 0.0438 |
| 16921789 |              |                                                                                       | 0.1247 | 0.0311 |
| 16921803 |              |                                                                                       | 0.109  | 0.0375 |
| 16921901 |              |                                                                                       | 0.2037 | 0.014  |
| 16921914 | LINC00113    | long intergenic non-protein coding RNA 113                                            | 0.3937 | 0.0212 |
| 16921923 | LINC00314    | long intergenic non-protein coding RNA 314                                            | 0.1046 | 0.0247 |
| 16922099 |              |                                                                                       | 0.1834 | 0.0026 |
| 16922219 |              |                                                                                       | 0.1379 | 0.0312 |
| 16922424 | KCNE2        | potassium voltage-gated channel, Isk-related family, member 2                         | 0.2382 | 0.041  |
| 16922779 | ETS2         | v-ets erythroblastosis virus E26 oncogene homolog 2 (avian)                           | 0.3758 | 0.0345 |
| 16922807 |              |                                                                                       | 0.1492 | 0.0214 |
| 16922907 | DSCAM-AS1    | DSCAM antisense RNA 1 (non-protein coding)                                            | 0.1074 | 0.0326 |
| 16923666 | KRTAP10-11   | keratin associated protein 10-11                                                      | 0.2405 | 0.0106 |
| 16923805 | PCBP3        | poly(rC) binding protein 3                                                            | 0.3466 | 0.0029 |
| 16924155 | TPTE         | transmembrane phosphatase with tensin homology                                        | 0.4251 | 0.0166 |
| 16924172 | MIR3156-3    | microRNA 3156-3                                                                       | 0.1918 | 0.0017 |
| 16924295 |              |                                                                                       | 0.2546 | 0.0276 |
| 16924320 | C21orf91-OT1 | C21orf91 overlapping transcript 1 (non-protein coding)                                | 0.1614 | 0.0294 |
| 16924339 | CHODL-AS1    | CHODL antisense RNA 1 (non-protein coding)                                            | 0.1284 | 0.0492 |
| 16924343 |              |                                                                                       | 0.127  | 0.0151 |

|          |            |                                                                                         |        |        |
|----------|------------|-----------------------------------------------------------------------------------------|--------|--------|
| 16924395 |            |                                                                                         | 0.1485 | 0.0167 |
| 16924408 |            |                                                                                         | 0.2196 | 0.0249 |
| 16924845 | KRTAP19-7  | keratin associated protein 19-7                                                         | 0.2861 | 0.007  |
| 16924866 | KRTAP21-1  | keratin associated protein 21-1                                                         | 0.318  | 0.0079 |
| 16925400 |            |                                                                                         | 0.2622 | 0.0171 |
| 16925586 |            |                                                                                         | 0.1518 | 0.0259 |
| 16925591 |            |                                                                                         | 0.1667 | 0.0098 |
| 16925594 |            |                                                                                         | 0.179  | 0.0307 |
| 16925893 |            |                                                                                         | 0.1826 | 0.0285 |
| 16926299 |            |                                                                                         | 0.3095 | 0.0001 |
| 16926445 | PTTG1IP    | pituitary tumor-transforming 1 interacting protein                                      | 0.2859 | 0.0278 |
| 16926772 |            |                                                                                         | 0.2304 | 0.0459 |
| 16927824 | IGLV3-10   | immunoglobulin lambda variable 3-10                                                     | 0.2508 | 0.0454 |
| 16927836 | IGLV4-3    | immunoglobulin lambda variable 4-3                                                      | 0.2567 | 0.0177 |
| 16927840 | IGLV3-1    | immunoglobulin lambda variable 3-1                                                      | 0.3423 | 0.0416 |
| 16927973 |            |                                                                                         | 0.1791 | 0.0442 |
| 16928733 |            |                                                                                         | 0.1756 | 0.0195 |
| 16929368 | SLC5A1     | solute carrier family 5 (sodium/glucose cotransporter), member 1                        | 0.2483 | 0.024  |
| 16929734 |            |                                                                                         | 0.1747 | 0.0186 |
| 16929741 | CYTH4      | cytohesin 4                                                                             | 0.3457 | 0.0045 |
| 16930021 | MIR4534    | microRNA 4534                                                                           | 1.1049 | 0.0012 |
| 16930173 | APOBEC3D   | apolipoprotein B mRNA editing enzyme, catalytic polypeptide-like 3D                     | 0.6237 | 0.0101 |
| 16930532 |            |                                                                                         | 0.1745 | 0.0299 |
| 16930664 | CSDC2      | cold shock domain containing C2, RNA binding                                            | 0.4434 | 0.0051 |
| 16931068 | PARVG      | parvin, gamma                                                                           | 0.1636 | 0.0427 |
| 16931499 | LOC284930  | uncharacterized LOC284930                                                               | 0.249  | 0.0356 |
| 16931524 |            |                                                                                         | 0.2947 | 0.0035 |
| 16931884 | OR11H1     | olfactory receptor, family 11, subfamily H, member 1                                    | 0.1825 | 0.0226 |
| 16932686 |            |                                                                                         | 0.1477 | 0.0245 |
| 16932702 | TUBA3FP    | tubulin, alpha 3f, pseudogene                                                           | 0.2457 | 0.028  |
| 16932706 | SLC7A4     | solute carrier family 7 (orphan transporter), member 4                                  | 0.5425 | 0.0033 |
| 16932716 | P2RX6P     | purinergic receptor P2X, ligand-gated ion channel, 6 pseudogene                         | 0.19   | 0.0492 |
| 16932906 | PRAMEL     | preferentially expressed antigen in melanoma-like                                       | 0.1844 | 0.0258 |
| 16932988 | ZDHHC8P1   | zinc finger, DHHC-type containing 8 pseudogene 1                                        | 0.3954 | 0.0003 |
| 16932995 |            |                                                                                         | 0.2304 | 0.0196 |
| 16933422 |            |                                                                                         | 0.1258 | 0.0074 |
| 16933665 |            |                                                                                         | 0.1148 | 0.0278 |
| 16933960 | DUSP18     | dual specificity phosphatase 18                                                         | 0.328  | 0.0109 |
| 16934248 | BPIFC      | BPI fold containing family C                                                            | 0.1499 | 0.0044 |
| 16934354 |            |                                                                                         | 0.1229 | 0.0042 |
| 16934609 |            |                                                                                         | 0.813  | 0.0161 |
| 16934749 | RAC2       | ras-related C3 botulinum toxin substrate 2 (rho family, small GTP binding protein Rac2) | 0.2683 | 0.0064 |
| 16934780 |            |                                                                                         | 0.1654 | 0.041  |
| 16935228 | PDGFB      | platelet-derived growth factor beta polypeptide                                         | 0.1619 | 0.0434 |
| 16935274 | ENTHD1     | ENTH domain containing 1                                                                | 0.2027 | 0      |
| 16935342 | MIR4766    | microRNA 4766                                                                           | 0.158  | 0.0153 |
| 16935836 | EFCAB6     | EF-hand calcium binding domain 6                                                        | 0.2702 | 0.0196 |
| 16936025 |            |                                                                                         | 0.2214 | 0.0152 |
| 16936640 |            |                                                                                         | 0.213  | 0.0116 |
| 16936756 |            |                                                                                         | 0.1361 | 0.0206 |
| 16937090 |            |                                                                                         | 0.201  | 0.0202 |
| 16937167 | SRGAP3-AS2 | SRGAP3 antisense RNA 2 (non-protein coding)                                             | 0.6433 | 0.0009 |
| 16937645 | SLC6A1     | solute carrier family 6 (neurotransmitter transporter, GABA), member 1                  | 0.8013 | 0.0086 |
| 16937671 | HRH1       | histamine receptor H1                                                                   | 0.2108 | 0.0212 |
| 16937681 | ATG7       | autophagy related 7                                                                     | 0.2751 | 0.0304 |
| 16937725 | SYN2       | synapsin II                                                                             | 1.3215 | 0.0052 |

|          |              |                                                                                         |        |        |
|----------|--------------|-----------------------------------------------------------------------------------------|--------|--------|
| 16937793 |              |                                                                                         | 0.4881 | 0.0252 |
| 16937925 |              |                                                                                         | 0.3588 | 0.0064 |
| 16938112 | BTD          | biotinidase                                                                             | 0.2385 | 0.033  |
| 16938215 |              |                                                                                         | 0.1133 | 0.0161 |
| 16938322 | UBE2E2       | ubiquitin-conjugating enzyme E2E 2                                                      | 0.47   | 0.0185 |
| 16938394 | LOC644990    | uncharacterized LOC644990                                                               | 0.1983 | 0.0145 |
| 16938554 |              |                                                                                         | 0.1779 | 0.0319 |
| 16938579 | RN5S127      | RNA, 5S ribosomal 127                                                                   | 0.3602 | 0.0021 |
| 16938581 |              |                                                                                         | 0.2353 | 0.0135 |
| 16938724 | FBXL2        | F-box and leucine-rich repeat protein 2                                                 | 0.4262 | 0.0112 |
| 16938815 |              |                                                                                         | 0.1722 | 0.0201 |
| 16938875 | STAC         | SH3 and cysteine rich domain                                                            | 1.0989 | 0.006  |
| 16938897 |              |                                                                                         | 0.21   | 0.008  |
| 16938973 | C3orf35      | chromosome 3 open reading frame 35                                                      | 0.2135 | 0.0464 |
| 16939023 | CTDSPL       | CTD (carboxy-terminal domain, RNA polymerase II, polypeptide A) small phosphatase-like  | 0.3239 | 0.0082 |
| 16939203 | XYLB         | xylulokinase homolog (H. influenzae)                                                    | 0.3153 | 0.0078 |
| 16939369 |              |                                                                                         | 0.1349 | 0.0462 |
| 16939390 | SLC25A38     | solute carrier family 25, member 38                                                     | 0.3884 | 0.0077 |
| 16939590 |              |                                                                                         | 0.5462 | 0.0102 |
| 16939863 | C3orf23      | chromosome 3 open reading frame 23                                                      | 0.276  | 0.0128 |
| 16939942 | ZNF502       | zinc finger protein 502                                                                 | 0.3604 | 0.0491 |
| 16940154 | CXCR6        | chemokine (C-X-C motif) receptor 6                                                      | 0.2649 | 0.0312 |
| 16940182 | CCR5         | chemokine (C-C motif) receptor 5 (gene/pseudogene)                                      | 0.1564 | 0.0117 |
| 16940225 | LOC100132146 | uncharacterized LOC100132146                                                            | 0.1503 | 0.0321 |
| 16940988 | GNAI2        | guanine nucleotide binding protein (G protein), alpha inhibiting activity polypeptide 2 | 0.2001 | 0.0267 |
| 16941088 | MAPKAPK3     | mitogen-activated protein kinase-activated protein kinase 3                             | 0.5618 | 0.0035 |
| 16941114 | DOCK3        | dedicator of cytokinesis 3                                                              | 0.7882 | 0.006  |
| 16941167 | MANF         | mesencephalic astrocyte-derived neurotrophic factor                                     | 0.2419 | 0.0196 |
| 16941389 | GLYCK        | glycerate kinase                                                                        | 0.239  | 0.0226 |
| 16941871 | IL17RB       | interleukin 17 receptor B                                                               | 0.22   | 0.0328 |
| 16941885 | CACNA2D3     | calcium channel, voltage-dependent, alpha 2/delta subunit 3                             | 0.4782 | 0.0142 |
| 16941948 |              |                                                                                         | 0.1054 | 0.0405 |
| 16941993 | ARHGEF3-AS1  | ARHGEF3 antisense RNA 1 (non-protein coding)                                            | 0.1961 | 0.0429 |
| 16941998 | SPATA12      | spermatogenesis associated 12                                                           | 0.1776 | 0.0339 |
| 16942042 | PDE12        | phosphodiesterase 12                                                                    | 0.2003 | 0.0409 |
| 16942165 |              |                                                                                         | 0.1742 | 0.0059 |
| 16942266 |              |                                                                                         | 0.1571 | 0.0267 |
| 16942311 | C3orf14      | chromosome 3 open reading frame 14                                                      | 0.6656 | 0.002  |
| 16942511 | KBTBD8       | kelch repeat and BTB (POZ) domain containing 8                                          | 0.6104 | 0.0109 |
| 16942560 | ARL6IP5      | ADP-ribosylation-like factor 6 interacting protein 5                                    | 0.4309 | 0.01   |
| 16942576 | MITF         | microphthalmia-associated transcription factor                                          | 0.4822 | 0.0054 |
| 16942620 |              |                                                                                         | 0.1815 | 0.0207 |
| 16942689 | PDZRN3-AS1   | PDZRN3 antisense RNA 1 (non-protein coding)                                             | 0.3008 | 0.0359 |
| 16942717 |              |                                                                                         | 0.3233 | 0.0023 |
| 16942741 | MIR4273      | microRNA 4273                                                                           | 0.5267 | 0.0439 |
| 16942806 |              |                                                                                         | 0.3135 | 0.0391 |
| 16942848 |              |                                                                                         | 0.2316 | 0.0462 |
| 16942981 |              |                                                                                         | 0.1838 | 0.0442 |
| 16942987 |              |                                                                                         | 0.2838 | 0.0397 |
| 16943009 | NSUN3        | NOP2/Sun domain family, member 3                                                        | 0.2371 | 0.0248 |
| 16943139 |              |                                                                                         | 0.2069 | 0.0129 |
| 16943145 | OR5H1        | olfactory receptor, family 5, subfamily H, member 1                                     | 0.2424 | 0.0018 |
| 16943169 | OR5K3        | olfactory receptor, family 5, subfamily K, member 3                                     | 0.1966 | 0.0079 |
| 16943393 |              |                                                                                         | 0.3159 | 0.0304 |
| 16943575 |              |                                                                                         | 0.1346 | 0.0357 |
| 16943579 |              |                                                                                         | 0.3386 | 0.0206 |
| 16943656 | HHLA2        | HERV-H LTR-associating 2                                                                | 0.1249 | 0.0446 |

|          |              |                                                             |        |        |
|----------|--------------|-------------------------------------------------------------|--------|--------|
| 16943719 | TRAT1        | T cell receptor associated transmembrane adaptor 1          | 0.3259 | 0.0007 |
| 16943729 | MORC1-AS1    | MORC1 antisense RNA 1 (non-protein coding)                  | 0.1705 | 0.0248 |
| 16943819 | PHLDB2       | pleckstrin homology-like domain, family B, member 2         | 0.4155 | 0.0442 |
| 16943868 | ABHD10       | abhydrolase domain containing 10                            | 0.408  | 0.0328 |
| 16943976 | LOC100129297 | uncharacterized LOC100129297                                | 0.2259 | 0.0205 |
| 16944055 | SIDT1        | SID1 transmembrane family, member 1                         | 0.3275 | 0.0013 |
| 16944094 | MIR4446      | microRNA 4446                                               | 0.2299 | 0.0104 |
| 16944120 | GRAMD1C      | GRAM domain containing 1C                                   | 0.8609 | 0.0003 |
| 16944199 | TIGIT        | T cell immunoreceptor with Ig and ITIM domains              | 0.1691 | 0.0366 |
| 16944325 | UPK1B        | uropod protein 1B                                           | 0.1588 | 0.0348 |
| 16944399 | ADPRH        | ADP-ribosylarginine hydrolase                               | 0.2773 | 0.0209 |
| 16944432 | C3orf15      | chromosome 3 open reading frame 15                          | 0.5242 | 0.0086 |
| 16944588 | SLC15A2      | solute carrier family 15 (H+/peptide transporter), member 2 | 0.4586 | 0.0409 |
| 16944665 | DTX3L        | deltex 3-like (Drosophila)                                  | 0.3339 | 0.0088 |
| 16944738 | PDIA5        | protein disulfide isomerase family A, member 5              | 0.4605 | 0.0128 |
| 16944791 | MYLK-AS2     | MYLK antisense RNA 2 (non-protein coding)                   | 0.1611 | 0.0227 |
| 16944917 |              |                                                             | 0.2443 | 0.0341 |
| 16945034 | CHCHD6       | coiled-coil-helix-coiled-coil-helix domain containing 6     | 0.2104 | 0.041  |
| 16945124 | PODXL2       | podocalyxin-like 2                                          | 0.4481 | 0.0012 |
| 16945241 | RAB7A        | RAB7A, member RAS oncogene family                           | 0.263  | 0.0284 |
| 16945300 |              |                                                             | 0.11   | 0.0438 |
| 16945320 | COPG1        | coatamer protein complex, subunit gamma 1                   | 0.2492 | 0.0192 |
| 16945426 | RHO          | rhodopsin                                                   | 0.1694 | 0.0208 |
| 16945434 | H1FOO        | H1 histone family, member O, oocyte-specific                | 0.1004 | 0.0379 |
| 16945625 | NEK11        | NIMA (never in mitosis gene a)- related kinase 11           | 0.3817 | 0.0044 |
| 16945682 | ACPP         | acid phosphatase, prostate                                  | 0.6987 | 0.0014 |
| 16945841 | BFSP2        | beaded filament structural protein 2, phakinin              | 0.2029 | 0.0099 |
| 16945923 |              |                                                             | 0.1939 | 0.004  |
| 16946657 | PLSCR5-AS1   | PLSCR5 antisense RNA 1 (non-protein coding)                 | 0.1475 | 0.0062 |
| 16946680 |              |                                                             | 0.1733 | 0.0217 |
| 16946744 | CPA3         | carboxypeptidase A3 (mast cell)                             | 0.7799 | 0.0058 |
| 16946783 | HLTF         | helicase-like transcription factor                          | 0.1811 | 0.0077 |
| 16946841 | RNF13        | ring finger protein 13                                      | 0.3013 | 0.0203 |
| 16946928 | SELT         | selenoprotein T                                             | 0.2768 | 0.0107 |
| 16946959 |              |                                                             | 0.3598 | 0.0167 |
| 16946964 |              |                                                             | 0.2221 | 0.0233 |
| 16947053 | SUCNR1       | succinate receptor 1                                        | 1.6556 | 0.0005 |
| 16947061 | MBNL1        | muscleblind-like splicing regulator 1                       | 0.2811 | 0.0066 |
| 16947092 |              |                                                             | 0.17   | 0.0063 |
| 16947377 | RSRC1        | arginine/serine-rich coiled-coil 1                          | 0.3337 | 0.0026 |
| 16947449 | MFS1         | major facilitator superfamily domain containing 1           | 0.2022 | 0.0067 |
| 16947613 | PPM1L        | protein phosphatase, Mg2+/Mn2+ dependent, 1L                | 0.5918 | 0.0023 |
| 16947626 | NMD3         | NMD3 homolog (S. cerevisiae)                                | 0.2254 | 0.0266 |
| 16947683 |              |                                                             | 0.146  | 0.0267 |
| 16947731 |              |                                                             | 0.1917 | 0.0173 |
| 16947782 |              |                                                             | 0.2774 | 0.0255 |
| 16947787 |              |                                                             | 0.1861 | 0.015  |
| 16947900 |              |                                                             | 0.2066 | 0.041  |
| 16947955 |              |                                                             | 0.2672 | 0.0241 |
| 16947971 |              |                                                             | 0.1418 | 0.0341 |
| 16948249 | MFN1         | mitofusin 1                                                 | 0.31   | 0.0083 |
| 16948348 |              |                                                             | 0.2926 | 0.0243 |
| 16948572 | KLHL24       | kelch-like 24 (Drosophila)                                  | 0.3963 | 0.0399 |
| 16949292 | DNAJB11      | DnaJ (Hsp40) homolog, subfamily B, member 11                | 0.2023 | 0.0254 |
| 16949442 | RTP4         | receptor (chemosensory) transporter protein 4               | 0.6924 | 0.0002 |
| 16949619 | OSTN         | osteocrin                                                   | 0.1172 | 0.0336 |
| 16949640 | PYDC2        | pyrin domain containing 2                                   | 0.3394 | 0.006  |
| 16949679 | HRASLS       | HRAS-like suppressor                                        | 1.0483 | 0.0071 |
| 16949776 |              |                                                             | 0.2573 | 0.0257 |
| 16950035 | SENP5        | SUMO1/sentrin specific peptidase 5                          | 0.2801 | 0.0199 |

|          |            |                                                                     |        |        |
|----------|------------|---------------------------------------------------------------------|--------|--------|
| 16950328 |            |                                                                     | 0.3469 | 0.0262 |
| 16950366 | GRM7-AS1   | GRM7 antisense RNA 1 (non-protein coding)                           | 0.1939 | 0.0076 |
| 16950375 |            |                                                                     | 0.1986 | 0.001  |
| 16950392 |            |                                                                     | 0.3154 | 0.0119 |
| 16950399 | C3orf32    | chromosome 3 open reading frame 32                                  | 0.1749 | 0.0184 |
| 16950470 | SRGAP3     | SLIT-ROBO Rho GTPase activating protein 3                           | 0.4195 | 0.0008 |
| 16950752 | ATP2B2-IT1 | ATP2B2 intronic transcript 1 (non-protein coding)                   | 0.1154 | 0.0339 |
| 16950761 | LINC00606  | long intergenic non-protein coding RNA 606                          | 0.2237 | 0.0085 |
| 16951007 | XPC        | xeroderma pigmentosum, complementation group C                      | 0.332  | 0.0251 |
| 16951244 |            |                                                                     | 0.6644 | 0.0002 |
| 16951329 |            |                                                                     | 0.1948 | 0.0101 |
| 16951452 |            |                                                                     | 0.2504 | 0.0348 |
| 16951500 | RNY4P22    | RNA, Ro-associated Y4 pseudogene 22                                 | 0.1845 | 0.0267 |
| 16951508 | ZNF385D    | zinc finger protein 385D                                            | 0.2032 | 0.0032 |
| 16951675 | LOC285326  | uncharacterized LOC285326                                           | 0.1582 | 0.0011 |
| 16951752 |            |                                                                     | 0.1789 | 0.0265 |
| 16951756 | SLC4A7     | solute carrier family 4, sodium bicarbonate cotransporter, member 7 | 0.3797 | 0.0498 |
| 16951863 | GADL1      | glutamate decarboxylase-like 1                                      | 0.2156 | 0.0474 |
| 16951997 | UBP1       | upstream binding protein 1 (LBP-1a)                                 | 0.1958 | 0.0385 |
| 16952118 | TRANK1     | tetratricopeptide repeat and ankyrin repeat containing 1            | 0.4878 | 0.0035 |
| 16952379 |            |                                                                     | 0.2049 | 0.0474 |
| 16952431 | CX3CR1     | chemokine (C-X3-C motif) receptor 1                                 | 0.9613 | 0.0002 |
| 16952439 | FLJ33065   | uncharacterized LOC440952                                           | 0.3255 | 0.0023 |
| 16952453 | RNU5B-2P   | RNA, U5B small nuclear 2, pseudogene                                | 0.1849 | 0.0053 |
| 16952469 | ULK4       | unc-51-like kinase 4 (C. elegans)                                   | 0.2716 | 0.0068 |
| 16952523 |            |                                                                     | 0.2277 | 0.016  |
| 16952594 | HHATL      | hedgehog acyltransferase-like                                       | 0.5113 | 0.0444 |
| 16952646 |            |                                                                     | 0.1442 | 0.0135 |
| 16952656 | KRBOX1-AS1 | KRBOX1 antisense RNA 1 (non-protein coding)                         | 0.1299 | 0.0413 |
| 16952659 | GTDC2      | glycosyltransferase-like domain containing 2                        | 0.3788 | 0.039  |
| 16952672 | ANO10      | anoctamin 10                                                        | 0.5322 | 0.001  |
| 16952720 | ZNF852     | zinc finger protein 852                                             | 0.4341 | 0.0021 |
| 16952737 | KIAA1143   | KIAA1143                                                            | 0.2457 | 0.0135 |
| 16952818 | LZTFL1     | leucine zipper transcription factor-like 1                          | 0.3519 | 0.0189 |
| 16952841 | FYCO1      | FYVE and coiled-coil domain containing 1                            | 0.4418 | 0.0152 |
| 16952990 | PRSS50     | protease, serine, 50                                                | 0.1978 | 0.0017 |
| 16953241 | MAP4       | microtubule-associated protein 4                                    | 0.3693 | 0.0211 |
| 16953277 |            |                                                                     | 0.2161 | 0.0375 |
| 16953396 | SHISA5     | shisa homolog 5 (Xenopus laevis)                                    | 0.2408 | 0.0346 |
| 16953809 | MIR425     | microRNA 425                                                        | 0.1843 | 0.0369 |
| 16954091 | NICN1      | nicolin 1                                                           | 0.2295 | 0.0279 |
| 16954217 | UBA7       | ubiquitin-like modifier activating enzyme 7                         | 0.419  | 0.0053 |
| 16954431 | TUSC2      | tumor suppressor candidate 2                                        | 0.2226 | 0.0392 |
| 16954567 | CISH       | cytokine inducible SH2-containing protein                           | 0.8137 | 0      |
| 16954730 | TWF2       | twinfilin, actin-binding protein, homolog 2 (Drosophila)            | 0.3295 | 0.0472 |
| 16954759 | MIRLET7G   | microRNA let-7g                                                     | 0.303  | 0.0163 |
| 16955220 |            |                                                                     | 0.1727 | 0.0239 |
| 16955225 | ERC2       | ELKS/RAB6-interacting/CAST family member 2                          | 0.4081 | 0.0001 |
| 16955255 | MIR3938    | microRNA 3938                                                       | 0.1427 | 0.045  |
| 16955595 | C3orf67    | chromosome 3 open reading frame 67                                  | 0.535  | 0.0058 |
| 16956149 | FOXP1      | forkhead box P1                                                     | 0.2905 | 0.0236 |
| 16956199 | EIF4E3     | eukaryotic translation initiation factor 4E family member 3         | 0.5878 | 0.0026 |
| 16956258 | RN5S136    | RNA, 5S ribosomal 136                                               | 0.241  | 0.0125 |
| 16956260 | SHQ1       | SHQ1 homolog (S. cerevisiae)                                        | 0.26   | 0.0093 |
| 16956316 | CNTN3      | contactin 3 (plasmacytoma associated)                               | 0.47   | 0.027  |
| 16956356 |            |                                                                     | 0.4672 | 0.0004 |
| 16956377 |            |                                                                     | 0.1905 | 0.029  |
| 16956512 | CADM2-AS2  | CADM2 antisense RNA 2 (non-protein coding)                          | 0.1192 | 0.0193 |
| 16956554 |            |                                                                     | 0.1289 | 0.0278 |

|          |           |                                                                                   |        |        |
|----------|-----------|-----------------------------------------------------------------------------------|--------|--------|
| 16956569 | PROS1     | protein S (alpha)                                                                 | 0.973  | 0      |
| 16956607 |           |                                                                                   | 0.1779 | 0.0429 |
| 16956749 | FILIP1L   | filamin A interacting protein 1-like                                              | 0.3516 | 0.0387 |
| 16956792 | ABI3BP    | ABI family, member 3 (NESH) binding protein                                       | 1.5181 | 0.0004 |
| 16956897 | SENP7     | SUMO1/sentrin specific peptidase 7                                                | 0.2499 | 0.034  |
| 16957033 |           |                                                                                   | 0.1765 | 0.0226 |
| 16957106 | IFT57     | intraflagellar transport 57 homolog (Chlamydomonas)                               | 0.2907 | 0.017  |
| 16957197 |           |                                                                                   | 0.167  | 0.0243 |
| 16957312 | GCET2     | germinal center expressed transcript 2                                            | 0.2422 | 0.0105 |
| 16957433 | CD200R1   | CD200 receptor 1                                                                  | 0.3525 | 0.0369 |
| 16957551 | SIDT1-AS1 | SIDT1 antisense RNA 1 (non-protein coding)                                        | 0.2619 | 0      |
| 16957554 | KIAA2018  | KIAA2018                                                                          | 0.2207 | 0.0457 |
| 16958044 | IQCB1     | IQ motif containing B1                                                            | 0.296  | 0.0378 |
| 16958540 | SLC41A3   | solute carrier family 41, member 3                                                | 0.5291 | 0.0261 |
| 16958618 |           |                                                                                   | 0.1518 | 0.0217 |
| 16958759 | TPRA1     | transmembrane protein, adipocyte associated 1                                     | 0.2078 | 0.0056 |
| 16958807 |           |                                                                                   | 0.1747 | 0.0084 |
| 16958844 | GATA2     | GATA binding protein 2                                                            | 0.2054 | 0.0137 |
| 16958897 | KIAA1257  | KIAA1257                                                                          | 0.145  | 0.0362 |
| 16959105 |           |                                                                                   | 0.2287 | 0.0331 |
| 16959148 | ASTE1     | asteroid homolog 1 (Drosophila)                                                   | 0.343  | 0.0041 |
| 16959169 |           |                                                                                   | 1.42   | 0      |
| 16959174 |           |                                                                                   | 0.2708 | 0.0368 |
| 16959178 | LOC339874 | uncharacterized LOC339874                                                         | 0.3465 | 0.0263 |
| 16959208 | CPNE4     | copine IV                                                                         | 1.5411 | 0      |
| 16959412 | RYK       | receptor-like tyrosine kinase                                                     | 0.3336 | 0.0181 |
| 16959701 | PIK3CB    | phosphoinositide-3-kinase, catalytic, beta polypeptide                            | 0.4636 | 0.0028 |
| 16959760 | COPB2     | coatamer protein complex, subunit beta 2 (beta prime)                             | 0.2092 | 0.0404 |
| 16959835 |           |                                                                                   | 0.2598 | 0.0148 |
| 16959837 |           |                                                                                   | 0.1658 | 0.0375 |
| 16960054 | PCOLCE2   | procollagen C-endopeptidase enhancer 2                                            | 0.7719 | 0.0382 |
| 16960084 | SLC9A9    | solute carrier family 9, subfamily A (NHE9, cation proton antiporter 9), member 9 | 0.7211 | 0.0044 |
| 16960254 |           |                                                                                   | 0.1859 | 0.0288 |
| 16960434 | ANKUB1    | ankyrin repeat and ubiquitin domain containing 1                                  | 0.226  | 0.0286 |
| 16960526 | FAM188B2  | family with sequence similarity 188, member B2                                    | 0.4314 | 0.0462 |
| 16960573 | P2RY13    | purinergic receptor P2Y, G-protein coupled, 13                                    | 0.5789 | 0.0111 |
| 16960601 |           |                                                                                   | 0.1495 | 0.0012 |
| 16960622 |           |                                                                                   | 0.1644 | 0.0227 |
| 16960705 | PLCH1     | phospholipase C, eta 1                                                            | 0.4092 | 0.0417 |
| 16960801 | PA2G4P4   | proliferation-associated 2G4 pseudogene 4                                         | 0.4267 | 0.0441 |
| 16960803 | LOC339894 | uncharacterized LOC339894                                                         | 0.2011 | 0.0093 |
| 16960844 | VEPH1     | ventricular zone expressed PH domain homolog 1 (zebrafish)                        | 1.6066 | 0.0009 |
| 16960881 |           |                                                                                   | 0.1123 | 0.0047 |
| 16961039 | B3GALNT1  | beta-1,3-N-acetylgalactosaminyltransferase 1 (globoside blood group)              | 0.2945 | 0.0372 |
| 16961056 | SPTSSB    | serine palmitoyltransferase, small subunit B                                      | 0.4034 | 0.0127 |
| 16961157 |           |                                                                                   | 0.2584 | 0.0177 |
| 16961183 |           |                                                                                   | 0.1048 | 0.0446 |
| 16961186 |           |                                                                                   | 0.1022 | 0.0393 |
| 16961188 |           |                                                                                   | 0.2087 | 0.014  |
| 16961232 | SERPIN2   | serpin peptidase inhibitor, clade I (pancpin), member 2                           | 0.9177 | 0.0197 |
| 16961449 | SLC7A14   | solute carrier family 7 (orphan transporter), member 14                           | 1.3689 | 0.0024 |
| 16961475 | EIF5A2    | eukaryotic translation initiation factor 5A2                                      | 0.6286 | 0.0088 |
| 16961501 | TNIK      | TRAF2 and NCK interacting kinase                                                  | 0.6909 | 0.0185 |
| 16961547 | MIR569    | microRNA 569                                                                      | 0.3299 | 0.0018 |
| 16961603 |           |                                                                                   | 0.1795 | 0.0052 |
| 16961629 |           |                                                                                   | 0.1695 | 0.008  |
| 16961685 |           |                                                                                   | 0.1316 | 0.0426 |
| 16961695 |           |                                                                                   | 0.1413 | 0.0345 |

|          |              |                                                                          |        |        |
|----------|--------------|--------------------------------------------------------------------------|--------|--------|
| 16961747 |              |                                                                          | 0.3635 | 0.0002 |
| 16961749 |              |                                                                          | 0.6038 | 0.0039 |
| 16961773 | ZMAT3        | zinc finger, matrin-type 3                                               | 0.4645 | 0.0136 |
| 16961839 |              |                                                                          | 0.3049 | 0.0393 |
| 16961944 |              |                                                                          | 0.2693 | 0.0082 |
| 16962181 |              |                                                                          | 0.2279 | 0.0052 |
| 16962659 |              |                                                                          | 0.1045 | 0.0376 |
| 16963127 | MUC4         | mucin 4, cell surface associated                                         | 0.1395 | 0.0109 |
| 16963292 | PCYT1A       | phosphate cytidyltransferase 1, choline, alpha                           | 0.1782 | 0.0491 |
| 16963519 | BDH1         | 3-hydroxybutyrate dehydrogenase, type 1                                  | 0.3726 | 0.0114 |
| 16963542 | LOC220729    | succinate dehydrogenase complex, subunit A, flavoprotein (Fp) pseudogene | 0.6014 | 0.0132 |
| 16963651 | ZNF718       | zinc finger protein 718                                                  | 0.4439 | 0.0325 |
| 16963689 | PIGG         | phosphatidylinositol glycan anchor biosynthesis, class G                 | 0.3093 | 0.0322 |
| 16963901 |              |                                                                          | 0.5961 | 0.0269 |
| 16963906 | LOC285463    | uncharacterized LOC285463                                                | 0.2193 | 0.0056 |
| 16964120 | LOC402160    | uncharacterized LOC402160                                                | 0.2011 | 0.0375 |
| 16964232 | ADD1         | adducin 1 (alpha)                                                        | 0.2845 | 0.0242 |
| 16964495 | FLJ35424     | uncharacterized FLJ35424                                                 | 0.1784 | 0.0492 |
| 16964667 | LOC285484    | uncharacterized LOC285484                                                | 0.1075 | 0.0297 |
| 16964676 | WFS1         | Wolfram syndrome 1 (wolframin)                                           | 0.4685 | 0.0224 |
| 16964695 | MAN2B2       | mannosidase, alpha, class 2B, member 2                                   | 0.393  | 0.0289 |
| 16964749 | KIAA0232     | KIAA0232                                                                 | 0.4829 | 0.0021 |
| 16964833 | MIR4274      | microRNA 4274                                                            | 0.3621 | 0.0037 |
| 16964950 | CPZ          | carboxypeptidase Z                                                       | 0.1678 | 0.035  |
| 16964973 | LOC650293    | seven transmembrane helix receptor                                       | 0.2296 | 0.0036 |
| 16964995 | LOC100287144 | ubiquitin carboxyl-terminal hydrolase 17-like                            | 0.2313 | 0.0348 |
| 16965048 |              |                                                                          | 0.2295 | 0.0407 |
| 16965051 |              |                                                                          | 0.2034 | 0.0403 |
| 16965057 |              |                                                                          | 0.3135 | 0.0234 |
| 16965081 |              |                                                                          | 0.3157 | 0.0003 |
| 16965099 |              |                                                                          | 0.3222 | 0.0115 |
| 16965112 |              |                                                                          | 0.1815 | 0.0216 |
| 16965126 |              |                                                                          | 0.1782 | 0.0472 |
| 16965142 | LOC152742    | uncharacterized LOC152742                                                | 0.7556 | 0.0458 |
| 16965148 |              |                                                                          | 0.7265 | 0.005  |
| 16965152 |              |                                                                          | 0.4811 | 0.0106 |
| 16965157 |              |                                                                          | 0.4579 | 0.0056 |
| 16965160 |              |                                                                          | 0.1475 | 0.0152 |
| 16965313 | LAP3         | leucine aminopeptidase 3                                                 | 0.4092 | 0.0049 |
| 16965434 | PACRGL       | PARK2 co-regulated-like                                                  | 0.3979 | 0.0102 |
| 16965499 |              |                                                                          | 0.1248 | 0.0443 |
| 16965505 |              |                                                                          | 0.7062 | 0.0294 |
| 16965509 |              |                                                                          | 1.1351 | 0.0105 |
| 16965539 | ZCCHC4       | zinc finger, CCHC domain containing 4                                    | 0.3328 | 0.0142 |
| 16965559 | ANAPC4       | anaphase promoting complex subunit 4                                     | 0.3166 | 0.0186 |
| 16965625 |              |                                                                          | 0.5678 | 0.0048 |
| 16965628 | C4orf52      | chromosome 4 open reading frame 52                                       | 0.3067 | 0.0456 |
| 16965813 |              |                                                                          | 0.1735 | 0.0322 |
| 16965915 | C4orf19      | chromosome 4 open reading frame 19                                       | 0.5279 | 0.0001 |
| 16965983 | PTTG2        | pituitary tumor-transforming 2                                           | 0.2593 | 0.0251 |
| 16966004 |              |                                                                          | 0.1174 | 0.0228 |
| 16966074 | WDR19        | WD repeat domain 19                                                      | 0.411  | 0.044  |
| 16966137 | LIAS         | lipoic acid synthetase                                                   | 0.4604 | 0.0307 |
| 16966276 |              |                                                                          | 0.4611 | 0.0253 |
| 16966393 | SLC30A9      | solute carrier family 30 (zinc transporter), member 9                    | 0.3377 | 0.0223 |
| 16966432 | GRXCR1       | glutaredoxin, cysteine rich 1                                            | 0.1555 | 0.0447 |
| 16966497 | GABRB1       | gamma-aminobutyric acid (GABA) A receptor, beta 1                        | 0.148  | 0.0388 |
| 16966548 | NIPAL1       | NIPA-like domain containing 1                                            | 0.1996 | 0.0137 |
| 16966685 | SPATA18      | spermatogenesis associated 18                                            | 1.1672 | 0.0007 |

|          |           |                                                                            |        |        |
|----------|-----------|----------------------------------------------------------------------------|--------|--------|
| 16966704 |           |                                                                            | 0.1854 | 0.013  |
| 16966725 |           |                                                                            | 0.2386 | 0.0017 |
| 16966727 | LOC152578 | uncharacterized LOC152578                                                  | 0.1449 | 0.0322 |
| 16966906 |           |                                                                            | 0.1575 | 0.043  |
| 16966940 | EXOC1     | exocyst complex component 1                                                | 0.3147 | 0.0152 |
| 16967171 |           |                                                                            | 0.2325 | 0.0479 |
| 16967246 |           |                                                                            | 0.2647 | 0.0361 |
| 16967263 |           |                                                                            | 0.1897 | 0.0305 |
| 16967286 | STAP1     | signal transducing adaptor family member 1                                 | 0.1785 | 0.0093 |
| 16967465 | FDCSP     | follicular dendritic cell secreted protein                                 | 0.2737 | 0.0006 |
| 16967539 | ENAM      | enamelin                                                                   | 0.2051 | 0.0181 |
| 16967767 |           |                                                                            | 0.1234 | 0.0215 |
| 16967872 |           |                                                                            | 0.1747 | 0.0059 |
| 16968077 | CCNG2     | cyclin G2                                                                  | 0.315  | 0.0376 |
| 16968246 | BMP2K     | BMP2 inducible kinase                                                      | 0.6759 | 0.0052 |
| 16968428 |           |                                                                            | 0.577  | 0.0121 |
| 16968447 | AGPAT9    | 1-acylglycerol-3-phosphate O-acyltransferase 9                             | 0.3533 | 0.0462 |
| 16968497 | ARHGAP24  | Rho GTPase activating protein 24                                           | 0.7647 | 0.0066 |
| 16968521 | MIR4451   | microRNA 4451                                                              | 0.5815 | 0.0187 |
| 16968638 | DSPP      | dentin sialophosphoprotein                                                 | 0.2062 | 0.0464 |
| 16968675 | HSP90AB3P | heat shock protein 90kDa alpha (cytosolic), class B member 3, pseudogene   | 0.4048 | 0.0031 |
| 16968697 | PKD2      | polycystic kidney disease 2 (autosomal dominant)                           | 0.4085 | 0.0454 |
| 16968735 | HERC6     | HECT and RLD domain containing E3 ubiquitin protein ligase family member 6 | 0.6208 | 0.0017 |
| 16968765 | HERC5     | HECT and RLD domain containing E3 ubiquitin protein ligase 5               | 0.7825 | 0.0024 |
| 16968797 | HERC3     | HECT and RLD domain containing E3 ubiquitin protein ligase 3               | 0.682  | 0.0043 |
| 16968895 | FAM190A   | family with sequence similarity 190, member A                              | 0.2485 | 0.0127 |
| 16969051 | BMPR1B    | bone morphogenetic protein receptor, type IB                               | 0.7987 | 0.0084 |
| 16969093 | RAP1GDS1  | RAP1, GTP-GDP dissociation stimulator 1                                    | 0.298  | 0.0123 |
| 16969182 | C4orf17   | chromosome 4 open reading frame 17                                         | 0.152  | 0.0366 |
| 16969197 | MTPP      | microsomal triglyceride transfer protein                                   | 0.3965 | 0.0289 |
| 16969229 | DAPP1     | dual adaptor of phosphotyrosine and 3-phosphoinositides                    | 0.3183 | 0.0131 |
| 16969267 | BANK1     | B-cell scaffold protein with ankyrin repeats 1                             | 0.8574 | 0.0008 |
| 16969351 |           |                                                                            | 0.225  | 0.0106 |
| 16969558 | SGMS2     | sphingomyelin synthase 2                                                   | 0.4038 | 0.0378 |
| 16969578 | CYP2U1    | cytochrome P450, family 2, subfamily U, polypeptide 1                      | 0.4719 | 0.0481 |
| 16969638 |           |                                                                            | 0.9003 | 0.0012 |
| 16969839 | ALPK1     | alpha-kinase 1                                                             | 0.2698 | 0.0413 |
| 16969911 | ANK2      | ankyrin 2, neuronal                                                        | 0.9517 | 0.0026 |
| 16969986 | MIR1243   | microRNA 1243                                                              | 0.4304 | 0.0096 |
| 16969997 |           |                                                                            | 0.1927 | 0.037  |
| 16970027 |           |                                                                            | 0.1407 | 0.0229 |
| 16970096 | METTL14   | methyltransferase like 14                                                  | 0.3552 | 0.0065 |
| 16970112 |           |                                                                            | 0.1812 | 0.0228 |
| 16970115 |           |                                                                            | 0.2146 | 0.0023 |
| 16970118 | SYNPO2    | synaptopodin 2                                                             | 0.8688 | 0.0049 |
| 16970140 | USP53     | ubiquitin specific peptidase 53                                            | 1.2919 | 0.0003 |
| 16970201 |           |                                                                            | 0.2878 | 0.0186 |
| 16970258 | KIAA1109  | KIAA1109                                                                   | 0.3506 | 0.0227 |
| 16970399 | BBS12     | Bardet-Biedl syndrome 12                                                   | 0.5472 | 0.0047 |
| 16970444 |           |                                                                            | 0.1602 | 0.0062 |
| 16970713 |           |                                                                            | 0.1322 | 0.0292 |
| 16970757 |           |                                                                            | 0.141  | 0.0277 |
| 16970923 | SCOC      | short coiled-coil protein                                                  | 0.3389 | 0.0194 |
| 16970971 | IL15      | interleukin 15                                                             | 0.2677 | 0.0429 |
| 16971265 |           |                                                                            | 0.1279 | 0.0343 |
| 16971308 | ARHGAP10  | Rho GTPase activating protein 10                                           | 0.4545 | 0.0135 |



|          |              |                                                                                                |        |        |
|----------|--------------|------------------------------------------------------------------------------------------------|--------|--------|
| 16971344 |              |                                                                                                | 0.3967 | 0.002  |
| 16971350 |              |                                                                                                | 0.2999 | 0.009  |
| 16971375 | RN5S167      | RNA, 5S ribosomal 167                                                                          | 0.2728 | 0.0013 |
| 16971382 | DCLK2        | doublecortin-like kinase 2                                                                     | 0.5677 | 0.0472 |
| 16971435 | PRSS48       | protease, serine, 48                                                                           | 0.1669 | 0.0472 |
| 16971505 | ARFIP1       | ADP-ribosylation factor interacting protein 1                                                  | 0.2533 | 0.0451 |
| 16971631 | TLR2         | toll-like receptor 2                                                                           | 0.8133 | 0.0001 |
| 16971758 | TDO2         | tryptophan 2,3-dioxygenase                                                                     | 0.5919 | 0.0153 |
| 16971806 | GLRB         | glycine receptor, beta                                                                         | 0.7832 | 0.0011 |
| 16971907 |              |                                                                                                | 0.3626 | 0.0044 |
| 16971995 | RAPGEF2      | Rap guanine nucleotide exchange factor (GEF) 2                                                 | 0.3606 | 0.0217 |
| 16972188 |              |                                                                                                | 0.1461 | 0.0157 |
| 16972191 |              |                                                                                                | 0.1342 | 0.0396 |
| 16972198 | TLL1         | tolloid-like 1                                                                                 | 0.6607 | 0.0092 |
| 16972229 | ANXA10       | annexin A10                                                                                    | 0.168  | 0.0202 |
| 16972342 |              |                                                                                                | 0.2004 | 0.0198 |
| 16972359 | LOC100506122 | uncharacterized LOC100506122                                                                   | 0.1662 | 0.0195 |
| 16972396 | GALNT7       | UDP-N-acetyl-alpha-D-galactosamine:polypeptide N-acetylgalactosaminyltransferase 7 (GalNAc-T7) | 0.649  | 0.0068 |
| 16972505 | MIR4276      | microRNA 4276                                                                                  | 0.1277 | 0.037  |
| 16972512 |              |                                                                                                | 0.2262 | 0.0045 |
| 16972611 |              |                                                                                                | 0.1707 | 0.0109 |
| 16972614 |              |                                                                                                | 0.1718 | 0.0036 |
| 16972634 |              |                                                                                                | 0.3188 | 0.0162 |
| 16972658 | RN5S173      | RNA, 5S ribosomal 173                                                                          | 0.1077 | 0.0452 |
| 16972912 | SLC25A4      | solute carrier family 25 (mitochondrial carrier; adenine nucleotide translocator), member 4    | 0.5886 | 0.0036 |
| 16972993 | TLR3         | toll-like receptor 3                                                                           | 0.4941 | 0.041  |
| 16973036 |              |                                                                                                | 0.6474 | 0.0017 |
| 16973196 |              |                                                                                                | 0.1386 | 0.0449 |
| 16973375 | GAK          | cyclin G associated kinase                                                                     | 0.2521 | 0.0414 |
| 16973465 | RNF212       | ring finger protein 212                                                                        | 0.5364 | 0.0155 |
| 16973493 | TMED11P      | transmembrane emp24 protein transport domain containing 11, pseudogene                         | 0.3137 | 0.014  |
| 16973723 | ZFYVE28      | zinc finger, FYVE domain containing 28                                                         | 0.2772 | 0.0104 |
| 16973832 | LRPAP1       | low density lipoprotein receptor-related protein associated protein 1                          | 0.419  | 0.0167 |
| 16973857 | FAM86EP      | family with sequence similarity 86, member E, pseudogene                                       | 0.3171 | 0.0084 |
| 16973871 | TMEM128      | transmembrane protein 128                                                                      | 0.3849 | 0.0475 |
| 16974074 | LOC100507376 | uncharacterized LOC100507376                                                                   | 0.4602 | 0.0272 |
| 16974458 | LINC00504    | long intergenic non-protein coding RNA 504                                                     | 0.2044 | 0.0078 |
| 16974534 | PROM1        | prominin 1                                                                                     | 0.1244 | 0.0254 |
| 16974713 | DCAF16       | DDB1 and CUL4 associated factor 16                                                             | 0.3484 | 0.0293 |
| 16974819 |              |                                                                                                | 0.3549 | 0.0118 |
| 16974830 | PPARGC1A     | peroxisome proliferator-activated receptor gamma, coactivator 1 alpha                          | 1.2381 | 0.0001 |
| 16974900 | CCDC149      | coiled-coil domain containing 149                                                              | 0.3745 | 0.0019 |
| 16974963 |              |                                                                                                | 0.2152 | 0.0009 |
| 16974968 | SEL1L3       | sel-1 suppressor of lin-12-like 3 (C. elegans)                                                 | 1.3413 | 0.0024 |
| 16975012 | LOC100506024 | uncharacterized LOC100506024                                                                   | 0.2043 | 0.0156 |
| 16975023 | LOC100506048 | uncharacterized LOC100506048                                                                   | 0.2169 | 0.0108 |
| 16975154 |              |                                                                                                | 0.3536 | 0.0003 |
| 16975157 | RELL1        | RELT-like 1                                                                                    | 0.5741 | 0.0036 |
| 16975170 |              |                                                                                                | 0.1945 | 0.0018 |
| 16975203 | TLR10        | toll-like receptor 10                                                                          | 0.2906 | 0.0013 |
| 16975213 | TLR1         | toll-like receptor 1                                                                           | 0.4651 | 0.0093 |
| 16975226 | TLR6         | toll-like receptor 6                                                                           | 0.8753 | 0.0088 |
| 16975419 | APBB2        | amyloid beta (A4) precursor protein-binding, family B, member 2                                | 0.4779 | 0.0072 |
| 16975458 |              |                                                                                                | 0.5889 | 0.0314 |
| 16975478 |              |                                                                                                | 0.1759 | 0.0364 |

|          |              |                                                                                           |        |        |
|----------|--------------|-------------------------------------------------------------------------------------------|--------|--------|
| 16975558 |              |                                                                                           | 0.2624 | 0.0063 |
| 16975560 | KCTD8        | potassium channel tetramerisation domain containing 8                                     | 0.5595 | 0.0195 |
| 16975578 | GNPDA2       | glucosamine-6-phosphate deaminase 2                                                       | 0.4512 | 0.0101 |
| 16975707 | NFXL1        | nuclear transcription factor, X-box binding-like 1                                        | 0.3647 | 0.0316 |
| 16975890 | OCIAD2       | OCIA domain containing 2                                                                  | 0.6651 | 0.0001 |
| 16975954 | SCFD2        | sec1 family domain containing 2                                                           | 0.5101 | 0.0103 |
| 16976133 | AASDH        | aminoadipate-semialdehyde dehydrogenase                                                   | 0.2886 | 0.0223 |
| 16976177 | HOPX         | HOP homeobox                                                                              | 0.2318 | 0.0077 |
| 16976239 |              |                                                                                           | 0.1241 | 0.0315 |
| 16976300 | TECRL        | trans-2,3-enoyl-CoA reductase-like                                                        | 1.2969 | 0.0045 |
| 16976558 |              |                                                                                           | 0.175  | 0.0119 |
| 16976644 | IGJ          | immunoglobulin J polypeptide, linker protein for immunoglobulin alpha and mu polypeptides | 0.8585 | 0.0246 |
| 16976734 | COX18        | COX18 cytochrome c oxidase assembly homolog (S. cerevisiae)                               | 0.3584 | 0.0255 |
| 16976798 | RASSF6       | Ras association (RalGDS/AF-6) domain family member 6                                      | 0.3207 | 0.0338 |
| 16976926 | CDKL2        | cyclin-dependent kinase-like 2 (CDC2-related kinase)                                      | 0.9374 | 0.0004 |
| 16977052 | CXCL10       | chemokine (C-X-C motif) ligand 10                                                         | 0.7746 | 0.0173 |
| 16977058 | CXCL11       | chemokine (C-X-C motif) ligand 11                                                         | 0.3191 | 0.0131 |
| 16977217 | PAQR3        | progesterin and adipoQ receptor family member III                                         | 0.4717 | 0.0003 |
| 16977378 | TMEM150C     | transmembrane protein 150C                                                                | 0.6941 | 0.0304 |
| 16977758 | MIR4452      | microRNA 4452                                                                             | 0.3246 | 0.0086 |
| 16977855 |              |                                                                                           | 0.1382 | 0.0011 |
| 16977868 | ABCG2        | ATP-binding cassette, sub-family G (WHITE), member 2                                      | 0.8323 | 0.0086 |
| 16977986 | SNCA         | synuclein, alpha (non A4 component of amyloid precursor)                                  | 0.7825 | 0.0037 |
| 16978036 | HPGDS        | hematopoietic prostaglandin D synthase                                                    | 0.7847 | 0.0061 |
| 16978107 |              |                                                                                           | 0.1995 | 0.0166 |
| 16978164 | ADH5         | alcohol dehydrogenase 5 (class III), chi polypeptide                                      | 0.3408 | 0.0048 |
| 16978301 | LAMTOR3      | late endosomal/lysosomal adaptor, MAPK and MTOR activator 3                               | 0.3719 | 0.0255 |
| 16978310 | DNAJB14      | DnaJ (Hsp40) homolog, subfamily B, member 14                                              | 0.3126 | 0.0152 |
| 16978346 | DDIT4L       | DNA-damage-inducible transcript 4-like                                                    | 0.6977 | 0.0049 |
| 16978444 | MANBA        | mannosidase, beta A, lysosomal                                                            | 0.3134 | 0.0303 |
| 16978548 | BDH2         | 3-hydroxybutyrate dehydrogenase, type 2                                                   | 0.5904 | 0.0129 |
| 16978647 |              |                                                                                           | 0.1483 | 0.001  |
| 16978661 | PPA2         | pyrophosphatase (inorganic) 2                                                             | 0.5392 | 0.0015 |
| 16978710 |              |                                                                                           | 0.2883 | 0.0022 |
| 16978793 | PAPSS1       | 3'-phosphoadenosine 5'-phosphosulfate synthase 1                                          | 0.405  | 0.0018 |
| 16978813 |              |                                                                                           | 0.1798 | 0.0481 |
| 16978826 |              |                                                                                           | 0.3242 | 0.0023 |
| 16978956 | SETP20       | SET pseudogene 20                                                                         | 0.2141 | 0.0108 |
| 16978976 | CFI          | complement factor I                                                                       | 1.1999 | 0.0157 |
| 16979110 | MIR302D      | microRNA 302d                                                                             | 0.4362 | 0.0155 |
| 16979116 |              |                                                                                           | 0.2445 | 0.0037 |
| 16979125 |              |                                                                                           | 0.2366 | 0.0022 |
| 16979133 | CAMK2D       | calcium/calmodulin-dependent protein kinase II delta                                      | 0.4246 | 0.0369 |
| 16979182 | NDST4        | N-deacetylase/N-sulfotransferase (heparan glucosaminyl) 4                                 | 0.8217 | 0.0159 |
| 16979225 | PRSS12       | protease, serine, 12 (neurotrypsin, motopsin)                                             | 0.5968 | 0.0278 |
| 16979244 |              |                                                                                           | 0.1745 | 0.0418 |
| 16979256 | SEC24D       | SEC24 family, member D (S. cerevisiae)                                                    | 0.4275 | 0.0413 |
| 16979502 | TMEM155      | transmembrane protein 155                                                                 | 0.1157 | 0.0152 |
| 16979526 | BBS7         | Bardet-Biedl syndrome 7                                                                   | 0.4378 | 0.0356 |
| 16979553 | TRPC3        | transient receptor potential cation channel, subfamily C, member 3                        | 0.5102 | 0.017  |
| 16979787 |              |                                                                                           | 0.2249 | 0.0383 |
| 16979836 |              |                                                                                           | 0.144  | 0.0461 |
| 16979946 |              |                                                                                           | 0.3894 | 0.0099 |
| 16980045 | LOC100129858 | uncharacterized LOC100129858                                                              | 0.5488 | 0.0308 |
| 16980051 | CLGN         | calmegin                                                                                  | 1.3752 | 0.0206 |

|          |              |                                                                                   |        |        |
|----------|--------------|-----------------------------------------------------------------------------------|--------|--------|
| 16980361 |              |                                                                                   | 0.2485 | 0.0055 |
| 16980470 | NR3C2        | nuclear receptor subfamily 3, group C, member 2                                   | 1.0889 | 0.0004 |
| 16980495 |              |                                                                                   | 0.3065 | 0.0049 |
| 16980497 |              |                                                                                   | 0.2723 | 0.0049 |
| 16980506 | LOC285423    | uncharacterized LOC285423                                                         | 0.1213 | 0.0197 |
| 16980601 | SH3D19       | SH3 domain containing 19                                                          | 0.6453 | 0.0007 |
| 16980638 | PET112       | PET112 homolog (yeast)                                                            | 0.2743 | 0.0411 |
| 16980716 | TMEM154      | transmembrane protein 154                                                         | 0.3133 | 0.0054 |
| 16980730 | TIGD4        | tigger transposable element derived 4                                             | 0.3675 | 0.0012 |
| 16980918 | CTSO         | cathepsin O                                                                       | 0.753  | 0.0011 |
| 16980972 |              |                                                                                   | 0.4133 | 0.0233 |
| 16981045 |              |                                                                                   | 0.5949 | 0.0185 |
| 16981047 |              |                                                                                   | 0.1373 | 0.0256 |
| 16981119 | 1-Mar        | membrane-associated ring finger (C3HC4) 1, E3 ubiquitin protein ligase            | 0.1944 | 0.0311 |
| 16981177 | RN5S170      | RNA, 5S ribosomal 170                                                             | 0.1037 | 0.0369 |
| 16981210 |              |                                                                                   | 0.1658 | 0.0215 |
| 16981219 | DDX60        | DEAD (Asp-Glu-Ala-Asp) box polypeptide 60                                         | 0.695  | 0      |
| 16981426 | MFAP3L       | microfibrillar-associated protein 3-like                                          | 0.3312 | 0.0157 |
| 16981487 |              |                                                                                   | 0.1345 | 0.0124 |
| 16981502 |              |                                                                                   | 0.3738 | 0.0493 |
| 16981568 |              |                                                                                   | 0.1179 | 0.0432 |
| 16981760 | AGA          | aspartylglucosaminidase                                                           | 0.5745 | 0.0168 |
| 16981787 |              |                                                                                   | 0.1276 | 0.003  |
| 16981872 |              |                                                                                   | 0.1962 | 0.0261 |
| 16981911 |              |                                                                                   | 0.6046 | 0.0001 |
| 16982092 | MIR3945      | microRNA 3945                                                                     | 0.2292 | 0.0079 |
| 16982364 |              |                                                                                   | 0.1354 | 0.0352 |
| 16982413 | MIR1324      | microRNA 1324                                                                     | 0.1213 | 0.0113 |
| 16982579 | EXOC3        | exocyst complex component 3                                                       | 0.3473 | 0.0032 |
| 16982849 |              |                                                                                   | 0.1047 | 0.0485 |
| 16982868 |              |                                                                                   | 0.1065 | 0.0445 |
| 16982898 | KIAA0947     | KIAA0947                                                                          | 0.5545 | 0.0028 |
| 16983013 |              |                                                                                   | 0.1023 | 0.0181 |
| 16983548 |              |                                                                                   | 0.1336 | 0.0056 |
| 16983593 |              |                                                                                   | 0.3143 | 0.0151 |
| 16983597 |              |                                                                                   | 0.3945 | 0.0464 |
| 16983607 |              |                                                                                   | 0.294  | 0.025  |
| 16983609 |              |                                                                                   | 0.2224 | 0.0479 |
| 16983611 | LOC643401    | uncharacterized LOC643401                                                         | 1.2018 | 0.0026 |
| 16983672 |              |                                                                                   | 0.2631 | 0.0362 |
| 16983948 |              |                                                                                   | 0.3656 | 0.0076 |
| 16983950 | SPEF2        | sperm flagellar 2                                                                 | 0.5646 | 0.0041 |
| 16984235 |              |                                                                                   | 0.2174 | 0.0046 |
| 16984238 |              |                                                                                   | 0.3089 | 0.0124 |
| 16984241 |              |                                                                                   | 0.1148 | 0.0414 |
| 16984276 |              |                                                                                   | 0.1303 | 0.0389 |
| 16984336 | C5orf51      | chromosome 5 open reading frame 51                                                | 0.2343 | 0.0421 |
| 16984347 | FBXO4        | F-box protein 4                                                                   | 0.3293 | 0.0285 |
| 16984394 | CCDC152      | coiled-coil domain containing 152                                                 | 0.2576 | 0.0152 |
| 16984408 | LOC100129186 | uncharacterized LOC100129186                                                      | 0.4032 | 0.0408 |
| 16984492 | NNT          | nicotinamide nucleotide transhydrogenase                                          | 0.4415 | 0.0308 |
| 16984542 | MRPS30       | mitochondrial ribosomal protein S30                                               | 0.2527 | 0.0491 |
| 16984741 | NDUFS4       | NADH dehydrogenase (ubiquinone) Fe-S protein 4, 18kDa (NADH-coenzyme Q reductase) | 0.4271 | 0.0042 |
| 16984783 | GZMK         | granzyme K (granzyme 3; tryptase II)                                              | 0.714  | 0.0011 |
| 16984801 | GZMA         | granzyme A (granzyme 1, cytotoxic T-lymphocyte-associated serine esterase 3)      | 1.1423 | 0.0001 |
| 16984940 |              |                                                                                   | 0.1559 | 0.0304 |
| 16985033 | GAPT         | GRB2-binding adaptor protein, transmembrane                                       | 0.7207 | 0.0002 |
| 16985043 | RAB3C        | RAB3C, member RAS oncogene family                                                 | 0.8468 | 0.0117 |

|          |          |                                                                               |        |        |
|----------|----------|-------------------------------------------------------------------------------|--------|--------|
| 16985206 |          |                                                                               | 0.409  | 0.0328 |
| 16985217 | RNF180   | ring finger protein 180                                                       | 0.8191 | 0.0019 |
| 16985251 | CWC27    | CWC27 spliceosome-associated protein homolog ( <i>S. cerevisiae</i> )         | 0.4135 | 0.0017 |
| 16985273 |          |                                                                               | 0.1513 | 0.036  |
| 16985440 | MAST4    | microtubule associated serine/threonine kinase family member 4                | 0.3985 | 0.0077 |
| 16985637 | CDK7     | cyclin-dependent kinase 7                                                     | 0.2765 | 0.0261 |
| 16985658 | RAD17    | RAD17 homolog ( <i>S. pombe</i> )                                             | 0.2936 | 0.0225 |
| 16985842 |          |                                                                               | 0.2438 | 0.0335 |
| 16985939 |          |                                                                               | 0.2021 | 0.0132 |
| 16985950 | MAP1B    | microtubule-associated protein 1B                                             | 0.6659 | 0.0392 |
| 16986095 |          |                                                                               | 0.2    | 0.0065 |
| 16986138 | RGNEF    | 190 kDa guanine nucleotide exchange factor                                    | 0.6344 | 0.0172 |
| 16986198 |          |                                                                               | 0.1681 | 0.0037 |
| 16986246 |          |                                                                               | 0.2963 | 0.0446 |
| 16986351 | IQGAP2   | IQ motif containing GTPase activating protein 2                               | 0.6205 | 0.0154 |
| 16986539 | SCAMP1   | secretory carrier membrane protein 1                                          | 0.531  | 0.0005 |
| 16986748 | MSH3     | mutS homolog 3 ( <i>E. coli</i> )                                             | 0.3013 | 0.0312 |
| 16986961 |          |                                                                               | 0.1843 | 0.0195 |
| 16986983 | COX7C    | cytochrome c oxidase subunit VIIc                                             | 0.2994 | 0.0192 |
| 16987008 | RASA1    | RAS p21 protein activator (GTPase activating protein) 1                       | 0.5236 | 0.0006 |
| 16987076 |          |                                                                               | 0.3766 | 0.0016 |
| 16987118 |          |                                                                               | 0.1903 | 0.0015 |
| 16987280 |          |                                                                               | 0.3274 | 0.0167 |
| 16987287 | NR2F1    | nuclear receptor subfamily 2, group F, member 1                               | 0.2821 | 0.0199 |
| 16987335 |          |                                                                               | 0.1639 | 0.0076 |
| 16987377 | GPR150   | G protein-coupled receptor 150                                                | 0.4594 | 0.0381 |
| 16987459 | MIR583   | microRNA 583                                                                  | 0.1727 | 0.0366 |
| 16987531 | ERAP2    | endoplasmic reticulum aminopeptidase 2                                        | 1.1423 | 0.001  |
| 16987565 | LNPEP    | leucyl/cystinyl aminopeptidase                                                | 0.2589 | 0.0475 |
| 16987673 | PAM      | peptidylglycine alpha-amidating monooxygenase                                 | 0.5494 | 0.0109 |
| 16987720 | PPIP5K2  | diphosphoinositol pentakisphosphate kinase 2                                  | 0.3636 | 0.0078 |
| 16987795 |          |                                                                               | 0.2654 | 0.0408 |
| 16987798 | FER      | fer ( <i>fps/fes</i> related) tyrosine kinase                                 | 0.6188 | 0.0012 |
| 16987830 |          |                                                                               | 0.6166 | 0.0136 |
| 16987834 |          |                                                                               | 0.2019 | 0.0036 |
| 16987883 | SLC25A46 | solute carrier family 25, member 46                                           | 0.4142 | 0.0038 |
| 16988167 |          |                                                                               | 0.2034 | 0.0133 |
| 16988232 | COMMD10  | COMM domain containing 10                                                     | 0.3371 | 0.0069 |
| 16988251 |          |                                                                               | 0.6888 | 0.0278 |
| 16988261 |          |                                                                               | 0.3491 | 0.0152 |
| 16988301 | DMXL1    | Dmx-like 1                                                                    | 0.3124 | 0.0413 |
| 16988441 |          |                                                                               | 0.2415 | 0.0306 |
| 16988444 |          |                                                                               | 0.1701 | 0.0277 |
| 16988450 | SRFBP1   | serum response factor binding protein 1                                       | 0.3651 | 0.0055 |
| 16988477 | SNCAIP   | synuclein, alpha interacting protein                                          | 0.7856 | 0.0015 |
| 16988510 | SNX2     | sorting nexin 2                                                               | 0.3698 | 0.0027 |
| 16988537 |          |                                                                               | 0.4936 | 0.0088 |
| 16988562 |          |                                                                               | 0.1714 | 0.0302 |
| 16988686 | PHAX     | phosphorylated adaptor for RNA export                                         | 0.4123 | 0.005  |
| 16988725 | MEGF10   | multiple EGF-like-domains 10                                                  | 0.3547 | 0.0134 |
| 16988762 | PRRC1    | proline-rich coiled-coil 1                                                    | 0.3908 | 0.0056 |
| 16988861 | ISOC1    | isochorismatase domain containing 1                                           | 0.5672 | 0.0435 |
| 16988921 | LYRM7    | Lym7 homolog ( <i>mouse</i> )                                                 | 0.367  | 0.0435 |
| 16988971 | CSF2     | colony stimulating factor 2 ( <i>granulocyte-macrophage</i> )                 | 0.1816 | 0.009  |
| 16989001 | SLC22A4  | solute carrier family 22 (organic cation/ergothioneine transporter), member 4 | 0.3073 | 0.0066 |
| 16989018 | SLC22A5  | solute carrier family 22 (organic cation/carnitine transporter), member 5     | 0.64   | 0.002  |
| 16989038 | C5orf56  | chromosome 5 open reading frame 56                                            | 0.2932 | 0.0068 |

|          |           |                                                                      |        |        |
|----------|-----------|----------------------------------------------------------------------|--------|--------|
| 16989054 | RAD50     | RAD50 homolog ( <i>S. cerevisiae</i> )                               | 0.4037 | 0.0267 |
| 16989128 | RN5S192   | RNA, 5S ribosomal 192                                                | 0.2098 | 0.0026 |
| 16989171 |           |                                                                      | 0.3707 | 0.0025 |
| 16989199 |           |                                                                      | 0.174  | 0.0406 |
| 16989265 | PHF15     | PHD finger protein 15                                                | 0.5009 | 0.0147 |
| 16989325 | CAMLG     | calcium modulating ligand                                            | 0.294  | 0.0422 |
| 16989369 | C5orf24   | chromosome 5 open reading frame 24                                   | 0.2305 | 0.0116 |
| 16989408 | MIR4461   | microRNA 4461                                                        | 0.1903 | 0.0115 |
| 16989496 | TGFBI     | transforming growth factor, beta-induced, 68kDa                      | 0.8024 | 0.0018 |
| 16989554 | TRPC7-AS2 | TRPC7 antisense RNA 2 (non-protein coding)                           | 0.1611 | 0.0024 |
| 16989571 | MYOT      | myotilin                                                             | 0.523  | 0.0205 |
| 16989589 | PKD2L2    | polycystic kidney disease 2-like 2                                   | 0.1874 | 0.0113 |
| 16989683 | KDM3B     | lysine (K)-specific demethylase 3B                                   | 0.2234 | 0.0233 |
| 16989750 | CTNNA1    | catenin (cadherin-associated protein), alpha 1, 102kDa               | 0.3185 | 0.0151 |
| 16989881 | UBE2D2    | ubiquitin-conjugating enzyme E2D 2                                   | 0.1827 | 0.0363 |
| 16989897 | CXXC5     | CXXC finger protein 5                                                | 0.5228 | 0.0025 |
| 16989955 | IGIP      | IgA-inducing protein homolog ( <i>Bos taurus</i> )                   | 0.4007 | 0.0495 |
| 16989977 | CYSTM1    | cysteine-rich transmembrane module containing 1                      | 0.8455 | 0      |
| 16989986 |           |                                                                      | 0.8198 | 0.0002 |
| 16990120 |           |                                                                      | 0.3964 | 0.0313 |
| 16990132 |           |                                                                      | 0.1947 | 0.0355 |
| 16990135 |           |                                                                      | 0.2818 | 0.0297 |
| 16990136 |           |                                                                      | 0.3405 | 0.017  |
| 16990190 | ZMAT2     | zinc finger, matrin-type 2                                           | 0.3688 | 0.0082 |
| 16990205 | PCDHA11   | protocadherin alpha 11                                               | 0.372  | 0.037  |
| 16990423 | RNF14     | ring finger protein 14                                               | 0.407  | 0.0376 |
| 16990440 | NDFIP1    | Nedd4 family interacting protein 1                                   | 0.2768 | 0.0385 |
| 16990548 | HMHB1     | histocompatibility (minor) HB-1                                      | 0.1825 | 0.04   |
| 16990553 | KCTD16    | potassium channel tetramerisation domain containing 16               | 0.188  | 0.0041 |
| 16990567 |           |                                                                      | 0.2914 | 0.0255 |
| 16990678 | STK32A    | serine/threonine kinase 32A                                          | 1.4303 | 0.0048 |
| 16990796 | SPINK9    | serine peptidase inhibitor, Kazal type 9                             | 0.5213 | 0.0108 |
| 16990946 |           |                                                                      | 0.2967 | 0.0301 |
| 16990985 | PPARGC1B  | peroxisome proliferator-activated receptor gamma, coactivator 1 beta | 0.2408 | 0.0365 |
| 16991151 | SYNPO     | synaptopodin                                                         | 0.4922 | 0.0012 |
| 16991210 | GM2A      | GM2 ganglioside activator                                            | 0.4587 | 0.007  |
| 16991342 | MFAP3     | microfibrillar-associated protein 3                                  | 0.3018 | 0.0097 |
| 16991444 |           |                                                                      | 0.219  | 0.0405 |
| 16991447 | MRPL22    | mitochondrial ribosomal protein L22                                  | 0.2794 | 0.0366 |
| 16991624 |           |                                                                      | 0.1902 | 0.0146 |
| 16991647 |           |                                                                      | 0.6614 | 0.0138 |
| 16991650 |           |                                                                      | 0.5164 | 0.0105 |
| 16991663 |           |                                                                      | 0.1594 | 0.0401 |
| 16991685 | LOC285626 | uncharacterized LOC285626                                            | 0.1275 | 0.0231 |
| 16991712 | TTC1      | tetratricopeptide repeat domain 1                                    | 0.5887 | 0.0005 |
| 16991816 | GABRG2    | gamma-aminobutyric acid (GABA) A receptor, gamma 2                   | 0.195  | 0.0297 |
| 16991839 | CCNG1     | cyclin G1                                                            | 0.6633 | 0.0021 |
| 16991886 | MAT2B     | methionine adenosyltransferase II, beta                              | 0.4035 | 0.0065 |
| 16992122 | DOCK2     | dedicator of cytokinesis 2                                           | 0.4271 | 0.0095 |
| 16992346 |           |                                                                      | 0.515  | 0.0467 |
| 16992385 |           |                                                                      | 0.107  | 0.0301 |
| 16992456 | ATP6V0E1  | ATPase, H+ transporting, lysosomal 9kDa, V0 subunit e1               | 0.3371 | 0.0172 |
| 16992459 |           |                                                                      | 0.2799 | 0.0252 |
| 16992460 |           |                                                                      | 0.3441 | 0.0093 |
| 16992462 |           |                                                                      | 0.5289 | 0.0047 |
| 16992463 |           |                                                                      | 0.4215 | 0.0155 |
| 16992464 |           |                                                                      | 0.3074 | 0.0252 |
| 16992467 | CREBRF    | CREB3 regulatory factor                                              | 0.3627 | 0.0183 |

|          |            |                                                           |        |        |
|----------|------------|-----------------------------------------------------------|--------|--------|
| 16992557 | CPEB4      | cytoplasmic polyadenylation element binding protein 4     | 0.4755 | 0.042  |
| 16992664 | HRH2       | histamine receptor H2                                     | 0.2266 | 0.0027 |
| 16992705 | FAM153B    | family with sequence similarity 153, member B             | 0.4662 | 0.012  |
| 16992789 |            |                                                           | 0.2958 | 0.0204 |
| 16992809 | HIGD2A     | HIG1 hypoxia inducible domain family, member 2A           | 0.386  | 0.0242 |
| 16992877 |            |                                                           | 0.531  | 0.0049 |
| 16993088 | GRK6       | G protein-coupled receptor kinase 6                       | 0.3017 | 0.0078 |
| 16993127 | TMED9      | transmembrane emp24 protein transport domain containing 9 | 0.4083 | 0.017  |
| 16993164 |            |                                                           | 0.198  | 0.0217 |
| 16993173 | THOC3      | THO complex 3                                             | 0.5119 | 0.042  |
| 16993183 |            |                                                           | 0.5167 | 0.0027 |
| 16993289 | FLJ31183   | uncharacterized LOC401225                                 | 0.307  | 0.0007 |
| 16993302 | ZFP2       | zinc finger protein 2 homolog (mouse)                     | 0.4463 | 0.0315 |
| 16993311 | ZNF454     | zinc finger protein 454                                   | 0.5126 | 0.0051 |
| 16993321 |            |                                                           | 0.4722 | 0.0103 |
| 16993324 | ZNF879     | zinc finger protein 879                                   | 0.5451 | 0      |
| 16993335 | ZNF354C    | zinc finger protein 354C                                  | 1.1102 | 0.0001 |
| 16993349 | RUFY1      | RUN and FYVE domain containing 1                          | 0.3937 | 0.0009 |
| 16993397 | CANX       | calnexin                                                  | 0.2506 | 0.0176 |
| 16993403 |            |                                                           | 0.3874 | 0.0331 |
| 16993404 |            |                                                           | 0.7729 | 0.0219 |
| 16993413 |            |                                                           | 0.1517 | 0.0263 |
| 16993415 |            |                                                           | 0.469  | 0.0067 |
| 16993416 |            |                                                           | 0.1748 | 0.0445 |
| 16993423 |            |                                                           | 0.4121 | 0.0362 |
| 16993424 |            |                                                           | 0.4005 | 0.0329 |
| 16993427 |            |                                                           | 0.184  | 0.0323 |
| 16993430 |            |                                                           | 0.5456 | 0.0006 |
| 16993431 |            |                                                           | 0.3125 | 0.0078 |
| 16993432 |            |                                                           | 0.2452 | 0.0469 |
| 16993458 | SQSTM1     | sequestosome 1                                            | 0.2959 | 0.0497 |
| 16993494 |            |                                                           | 0.5737 | 0.0114 |
| 16993596 | OR2V2      | olfactory receptor, family 2, subfamily V, member 2       | 0.1758 | 0.0324 |
| 16993681 | OR4F29     | olfactory receptor, family 4, subfamily F, member 29      | 0.2265 | 0.0088 |
| 16993851 |            |                                                           | 0.2191 | 0.0034 |
| 16994054 | IRX4       | iroquois homeobox 4                                       | 0.2712 | 0.0055 |
| 16994158 |            |                                                           | 0.232  | 0.0128 |
| 16994230 |            |                                                           | 0.116  | 0.0457 |
| 16994244 | FASTKD3    | FAST kinase domains 3                                     | 0.4758 | 0.0035 |
| 16994309 | TAS2R1     | taste receptor, type 2, member 1                          | 0.1766 | 0.038  |
| 16994329 | FAM173B    | family with sequence similarity 173, member B             | 0.3311 | 0.0359 |
| 16994355 | ROPN1L-AS1 | ROPN1L antisense RNA 1 (non-protein coding)               | 0.1441 | 0.0354 |
| 16994373 | DAP        | death-associated protein                                  | 0.4425 | 0.0017 |
| 16994428 |            |                                                           | 0.1995 | 0.022  |
| 16994597 | FAM134B    | family with sequence similarity 134, member B             | 0.9466 | 0.0003 |
| 16994616 |            |                                                           | 0.3064 | 0.0115 |
| 16994696 |            |                                                           | 0.2172 | 0.0058 |
| 16994796 | LOC340107  | uncharacterized LOC340107                                 | 0.1794 | 0.0024 |
| 16995039 |            |                                                           | 0.1872 | 0.0061 |
| 16995044 |            |                                                           | 0.2506 | 0.0061 |
| 16995177 | PRLR       | prolactin receptor                                        | 2.4199 | 0.0003 |
| 16995241 | UGT3A2     | UDP glycosyltransferase 3 family, polypeptide A2          | 0.4055 | 0.0087 |
| 16995254 | LMBRD2     | LMBR1 domain containing 2                                 | 0.4764 | 0.018  |
| 16995301 | RANBP3L    | RAN binding protein 3-like                                | 0.7071 | 0.0313 |
| 16995326 |            |                                                           | 0.1849 | 0.0178 |
| 16995542 |            |                                                           | 0.3681 | 0.0214 |
| 16995601 | FYB        | FYN binding protein                                       | 0.4365 | 0.0375 |
| 16995678 | TTC33      | tetratricopeptide repeat domain 33                        | 0.5483 | 0.0003 |
| 16995721 | HEATR7B2   | HEAT repeat family member 7B2                             | 0.2185 | 0.0031 |
| 16995771 | C6         | complement component 6                                    | 0.8747 | 0.0035 |

|          |          |                                                                                 |        |        |
|----------|----------|---------------------------------------------------------------------------------|--------|--------|
| 16995797 |          |                                                                                 | 0.2027 | 0.0079 |
| 16995802 | PLCXD3   | phosphatidylinositol-specific phospholipase C, X domain containing 3            | 1.3363 | 0.0035 |
| 16995848 | SEPP1    | selenoprotein P, plasma, 1                                                      | 0.5739 | 0.0075 |
| 16995866 | FLJ32255 | uncharacterized LOC643977                                                       | 0.4507 | 0.0444 |
| 16996089 | MOCS2    | molybdenum cofactor synthesis 2                                                 | 0.4711 | 0.0189 |
| 16996152 |          |                                                                                 | 0.1164 | 0.0392 |
| 16996157 | CDC20B   | cell division cycle 20 homolog B ( <i>S. cerevisiae</i> )                       | 0.1255 | 0.0411 |
| 16996252 |          |                                                                                 | 0.1462 | 0.0486 |
| 16996298 | IL6ST    | interleukin 6 signal transducer (gp130, oncostatin M receptor)                  | 0.3826 | 0.0126 |
| 16996365 |          |                                                                                 | 0.197  | 0.017  |
| 16996564 | ELOVL7   | ELOVL fatty acid elongase 7                                                     | 0.8663 | 0.0006 |
| 16996800 |          |                                                                                 | 0.359  | 0.0013 |
| 16996872 |          |                                                                                 | 0.2924 | 0.0017 |
| 16996880 |          |                                                                                 | 0.6374 | 0.0222 |
| 16996939 |          |                                                                                 | 0.2438 | 0.0335 |
| 16997065 |          |                                                                                 | 0.1792 | 0.0152 |
| 16997178 |          |                                                                                 | 0.1208 | 0.0214 |
| 16997269 |          |                                                                                 | 0.2169 | 0.0226 |
| 16997389 |          |                                                                                 | 0.4039 | 0.0032 |
| 16997404 | WDR41    | WD repeat domain 41                                                             | 0.3325 | 0.0222 |
| 16997455 |          |                                                                                 | 0.173  | 0.0334 |
| 16997457 | AP3B1    | adaptor-related protein complex 3, beta 1 subunit                               | 0.2986 | 0.0183 |
| 16997586 |          |                                                                                 | 0.1489 | 0.0245 |
| 16997605 |          |                                                                                 | 0.3346 | 0.0418 |
| 16997646 |          |                                                                                 | 0.8942 | 0.0003 |
| 16997721 | SSBP2    | single-stranded DNA binding protein 2                                           | 1.0242 | 0.0002 |
| 16997849 |          |                                                                                 | 0.2009 | 0.0198 |
| 16997851 | MIR4280  | microRNA 4280                                                                   | 0.1538 | 0.0032 |
| 16997987 |          |                                                                                 | 0.2532 | 0.0265 |
| 16998007 | CETN3    | centrin, EF-hand protein, 3                                                     | 0.4493 | 0.0013 |
| 16998019 | MBLAC2   | metallo-beta-lactamase domain containing 2                                      | 0.3347 | 0.0181 |
| 16998027 | LYSMD3   | LysM, putative peptidoglycan-binding, domain containing 3                       | 0.352  | 0.0329 |
| 16998097 | FLJ42709 | uncharacterized LOC441094                                                       | 0.4111 | 0.0171 |
| 16998132 |          |                                                                                 | 0.2804 | 0.0294 |
| 16998134 | KIAA0825 | KIAA0825                                                                        | 0.4544 | 0.0259 |
| 16998211 | TTC37    | tetratricopeptide repeat domain 37                                              | 0.4642 | 0.004  |
| 16998309 | ELL2     | elongation factor, RNA polymerase II, 2                                         | 0.5396 | 0.0247 |
| 16998339 |          |                                                                                 | 0.3274 | 0.006  |
| 16998621 | NUDT12   | nudix (nucleoside diphosphate linked moiety X)-type motif 12                    | 0.7871 | 0.0053 |
| 16998675 |          |                                                                                 | 0.1602 | 0.0261 |
| 16998700 | FBXL17   | F-box and leucine-rich repeat protein 17                                        | 0.305  | 0.0055 |
| 16998727 | PJA2     | praja ring finger 2, E3 ubiquitin protein ligase                                | 0.2346 | 0.021  |
| 16998745 | TMEM232  | transmembrane protein 232                                                       | 0.4329 | 0.0179 |
| 16998787 |          |                                                                                 | 0.2134 | 0.0337 |
| 16998807 |          |                                                                                 | 0.1391 | 0.0126 |
| 16998850 | EPB41L4A | erythrocyte membrane protein band 4.1 like 4A                                   | 0.6677 | 0.0302 |
| 16998994 | CCDC112  | coiled-coil domain containing 112                                               | 0.3224 | 0.0351 |
| 16999017 | TMED7    | transmembrane emp24 protein transport domain containing 7                       | 0.2748 | 0.0048 |
| 16999053 | ATG12    | autophagy related 12                                                            | 0.242  | 0.0295 |
| 16999076 |          |                                                                                 | 0.4252 | 0.0038 |
| 16999083 | SEMA6A   | sema domain, transmembrane domain (TM), and cytoplasmic domain, (semaphorin) 6A | 0.8914 | 0.0321 |
| 16999203 |          |                                                                                 | 0.6237 | 0.0068 |
| 16999206 |          |                                                                                 | 0.2907 | 0.0306 |
| 16999210 | MGC32805 | uncharacterized LOC153163                                                       | 0.3595 | 0.0001 |
| 16999219 |          |                                                                                 | 0.4492 | 0.0011 |
| 16999343 |          |                                                                                 | 0.3256 | 0.0478 |

|          |           |                                                                           |        |        |
|----------|-----------|---------------------------------------------------------------------------|--------|--------|
| 16999357 |           |                                                                           | 0.1783 | 0.0294 |
| 16999379 | ALDH7A1   | aldehyde dehydrogenase 7 family, member A1                                | 0.3601 | 0.0281 |
| 16999432 | C5orf63   | chromosome 5 open reading frame 63                                        | 0.6598 | 0.0121 |
| 16999440 |           |                                                                           | 0.272  | 0.0036 |
| 16999446 |           |                                                                           | 0.2872 | 0.0157 |
| 16999456 |           |                                                                           | 0.1886 | 0.0153 |
| 16999585 |           |                                                                           | 0.4049 | 0.0195 |
| 16999631 | FNIP1     | folliculin interacting protein 1                                          | 0.4252 | 0.0071 |
| 16999754 | LOC553103 | uncharacterized LOC553103                                                 | 0.6569 | 0.0012 |
| 16999767 | MIR3936   | microRNA 3936                                                             | 0.494  | 0.001  |
| 16999769 |           |                                                                           | 0.1698 | 0.031  |
| 16999776 | IRF1      | interferon regulatory factor 1                                            | 0.4604 | 0.0004 |
| 16999974 | C5orf15   | chromosome 5 open reading frame 15                                        | 0.2539 | 0.026  |
| 17000235 | SPOCK1    | sparc/osteonectin, cwcv and kazal-like domains proteoglycan (testican) 1  | 0.939  | 0.0313 |
| 17000342 | NME5      | NME/NM23 family member 5                                                  | 1.3752 | 0      |
| 17000356 |           |                                                                           | 0.2935 | 0.0064 |
| 17000358 | BRD8      | bromodomain containing 8                                                  | 0.3405 | 0.0206 |
| 17000618 | DNAJC18   | DnaJ (Hsp40) homolog, subfamily C, member 18                              | 0.2437 | 0.0228 |
| 17000680 | NRG2      | neuregulin 2                                                              | 0.3033 | 0.0284 |
| 17000713 | PFDN1     | prefoldin subunit 1                                                       | 0.3726 | 0.0051 |
| 17000736 |           |                                                                           | 0.1254 | 0.031  |
| 17000793 | CD14      | CD14 molecule                                                             | 0.6967 | 0.0219 |
| 17000800 | NDUFA2    | NADH dehydrogenase (ubiquinone) 1 alpha subcomplex, 2, 8kDa               | 0.3497 | 0.0147 |
| 17000843 |           |                                                                           | 0.3988 | 0.0052 |
| 17000928 | ARAP3     | ArfGAP with RhoGAP domain, ankyrin repeat and PH domain 3                 | 0.3871 | 0.0229 |
| 17001060 |           |                                                                           | 0.2199 | 0.0214 |
| 17001134 | YIPF5     | Yip1 domain family, member 5                                              | 0.3216 | 0.0324 |
| 17001152 |           |                                                                           | 0.3624 | 0.026  |
| 17001155 |           |                                                                           | 0.4081 | 0.0459 |
| 17001249 |           |                                                                           | 0.1576 | 0.0272 |
| 17001256 | RN5S196   | RNA, 5S ribosomal 196                                                     | 0.9175 | 0.0011 |
| 17001258 | PPP2R2B   | protein phosphatase 2, regulatory subunit B, beta                         | 0.7538 | 0      |
| 17001299 | DPYSL3    | dihydropyrimidinase-like 3                                                | 0.5517 | 0.002  |
| 17001446 |           |                                                                           | 0.1635 | 0.0112 |
| 17001448 | MIR584    | microRNA 584                                                              | 0.2253 | 0.005  |
| 17001545 | CSF1R     | colony stimulating factor 1 receptor                                      | 0.4889 | 0.041  |
| 17001654 | CD74      | CD74 molecule, major histocompatibility complex, class II invariant chain | 0.6205 | 0.011  |
| 17001694 |           |                                                                           | 0.1781 | 0.0205 |
| 17001701 | RBM22     | RNA binding motif protein 22                                              | 0.3455 | 0.0012 |
| 17001747 | ZNF300    | zinc finger protein 300                                                   | 0.442  | 0.028  |
| 17001763 | TNIP1     | TNFAIP3 interacting protein 1                                             | 0.4793 | 0.0012 |
| 17001800 | ANXA6     | annexin A6                                                                | 0.7538 | 0.0037 |
| 17001944 |           |                                                                           | 0.1482 | 0.0369 |
| 17001946 | ATOX1     | ATX1 antioxidant protein 1 homolog (yeast)                                | 0.2333 | 0.018  |
| 17001961 | GLRA1     | glycine receptor, alpha 1                                                 | 0.3854 | 0.0303 |
| 17002032 |           |                                                                           | 0.3532 | 0.0034 |
| 17002115 | TIMD4     | T-cell immunoglobulin and mucin domain containing 4                       | 0.2114 | 0.0476 |
| 17002240 | CLINT1    | clathrin interactor 1                                                     | 0.4897 | 0.0002 |
| 17002264 |           |                                                                           | 0.2031 | 0.0027 |
| 17002278 | EBF1      | early B-cell factor 1                                                     | 0.8821 | 0.0349 |
| 17002354 | PWWP2A    | PWWP domain containing 2A                                                 | 0.3182 | 0.0307 |
| 17002496 |           |                                                                           | 0.1214 | 0.0286 |
| 17002498 |           |                                                                           | 0.1992 | 0.0292 |
| 17002503 |           |                                                                           | 0.2849 | 0.0062 |
| 17002527 |           |                                                                           | 0.2147 | 0.0146 |
| 17002555 |           |                                                                           | 0.1962 | 0.0163 |
| 17002584 |           |                                                                           | 0.2074 | 0.006  |



|          |              |                                                                                   |        |        |
|----------|--------------|-----------------------------------------------------------------------------------|--------|--------|
| 17002657 | MIR218-2     | microRNA 218-2                                                                    | 0.2587 | 0.0017 |
| 17002667 | FAM196B      | family with sequence similarity 196, member B                                     | 0.7482 | 0.0242 |
| 17002681 | LCP2         | lymphocyte cytosolic protein 2 (SH2 domain containing leukocyte protein of 76kDa) | 0.3582 | 0.0316 |
| 17002720 |              |                                                                                   | 0.1781 | 0.0325 |
| 17002871 |              |                                                                                   | 0.3776 | 0.0097 |
| 17002879 | NKX2-5       | NK2 homeobox 5                                                                    | 0.1752 | 0.0487 |
| 17002972 | THOC3        | THO complex 3                                                                     | 0.4927 | 0.0054 |
| 17003034 | KIAA1191     | KIAA1191                                                                          | 0.315  | 0.042  |
| 17003077 | RNF44        | ring finger protein 44                                                            | 0.519  | 0.0015 |
| 17003407 | FAM153A      | family with sequence similarity 153, member A                                     | 0.4901 | 0.0155 |
| 17003474 |              |                                                                                   | 0.1914 | 0.0145 |
| 17003477 |              |                                                                                   | 0.3594 | 0.0369 |
| 17003479 | NHP2         | NHP2 ribonucleoprotein homolog (yeast)                                            | 0.3407 | 0.0191 |
| 17003530 | COL23A1      | collagen, type XXIII, alpha 1                                                     | 0.1582 | 0.0116 |
| 17003610 | FLJ31183     | uncharacterized LOC401225                                                         | 0.4257 | 0.0046 |
| 17003725 | C5orf60      | chromosome 5 open reading frame 60                                                | 0.1405 | 0.0358 |
| 17003745 | LOC100652779 | uncharacterized LOC100652779                                                      | 0.3132 | 0.0033 |
| 17003781 | C5orf45      | chromosome 5 open reading frame 45                                                | 0.2558 | 0.0237 |
| 17003878 | RASGEF1C     | RasGEF domain family, member 1C                                                   | 0.271  | 0.0048 |
| 17003898 | MAPK9        | mitogen-activated protein kinase 9                                                | 0.6566 | 0.0015 |
| 17004084 |              |                                                                                   | 0.1832 | 0.015  |
| 17004141 | FLJ43763     | uncharacterized LOC642316                                                         | 0.2042 | 0.0233 |
| 17004262 |              |                                                                                   | 0.1907 | 0.0013 |
| 17004374 | FAM50B       | family with sequence similarity 50, member B                                      | 0.2654 | 0.0073 |
| 17004515 |              |                                                                                   | 0.2641 | 0.0011 |
| 17004518 | LY86         | lymphocyte antigen 86                                                             | 0.4653 | 0.0114 |
| 17004526 |              |                                                                                   | 0.2036 | 0.0114 |
| 17004769 | TMEM14B      | transmembrane protein 14B                                                         | 0.3611 | 0.0351 |
| 17005273 |              |                                                                                   | 0.1402 | 0.0213 |
| 17005326 | NRSN1        | neurensin 1                                                                       | 0.3241 | 0.0008 |
| 17005488 | HIST1H2BA    | histone cluster 1, H2ba                                                           | 0.1003 | 0.0485 |
| 17005542 | HFE          | hemochromatosis                                                                   | 0.4889 | 0.0154 |
| 17005596 | HIST2H4B     | histone cluster 2, H4b                                                            | 0.2117 | 0.0436 |
| 17005655 | BTN3A1       | butyrophilin, subfamily 3, member A1                                              | 0.375  | 0.0098 |
| 17005740 | HCG11        | HLA complex group 11 (non-protein coding)                                         | 0.5373 | 0.0258 |
| 17005888 | ZNF165       | zinc finger protein 165                                                           | 0.7819 | 0.0004 |
| 17005894 | ZSCAN12P1    | zinc finger and SCAN domain containing 12 pseudogene 1                            | 0.4696 | 0.0011 |
| 17005998 | C6orf100     | chromosome 6 open reading frame 100                                               | 0.206  | 0.0373 |
| 17006060 | LOC100507362 | uncharacterized LOC100507362                                                      | 0.1228 | 0.0495 |
| 17006087 | HLA-F        | major histocompatibility complex, class I, F                                      | 0.4912 | 0.004  |
| 17006122 | HLA-G        | major histocompatibility complex, class I, G                                      | 0.5155 | 0      |
| 17006142 | HLA-A        | major histocompatibility complex, class I, A                                      | 0.6047 | 0.0012 |
| 17006222 | HLA-L        | major histocompatibility complex, class I, L (pseudogene)                         | 0.3453 | 0.0088 |
| 17006261 | HLA-E        | major histocompatibility complex, class I, E                                      | 0.8356 | 0.0003 |
| 17006605 | HCP5         | HLA complex P5 (non-protein coding)                                               | 1.5682 | 0.0019 |
| 17006611 |              |                                                                                   | 0.259  | 0.0169 |
| 17006614 | HCG26        | HLA complex group 26 (non-protein coding)                                         | 0.765  | 0.026  |
| 17006666 | LST1         | leukocyte specific transcript 1                                                   | 0.3373 | 0.0008 |
| 17006683 | AIF1         | allograft inflammatory factor 1                                                   | 0.5142 | 0.017  |
| 17006949 | CFB          | complement factor B                                                               | 0.6313 | 0.0027 |
| 17007048 | C4A          | complement component 4A (Rodgers blood group)                                     | 1.0789 | 0.0082 |
| 17007118 | C4B          | complement component 4B (Chido blood group)                                       | 1.0981 | 0.0085 |
| 17007257 | HLA-DRA      | major histocompatibility complex, class II, DR alpha                              | 1.0542 | 0.0023 |
| 17007266 | HLA-DQA1     | major histocompatibility complex, class II, DQ alpha 1                            | 0.5462 | 0.0422 |
| 17007292 | HLA-DQA2     | major histocompatibility complex, class II, DQ alpha 2                            | 0.9277 | 0.0003 |
| 17007352 | HLA-DPB1     | major histocompatibility complex, class II, DP beta 1                             | 0.763  | 0.0044 |
| 17007368 | HLA-DPB2     | major histocompatibility complex, class II, DP beta 2 (pseudogene)                | 0.6012 | 0.0043 |

|          |              |                                                                        |        |        |
|----------|--------------|------------------------------------------------------------------------|--------|--------|
| 17007605 |              |                                                                        | 0.1785 | 0.0157 |
| 17007654 |              |                                                                        | 0.2212 | 0.0072 |
| 17007810 | PPARD        | peroxisome proliferator-activated receptor delta                       | 0.3528 | 0.0403 |
| 17007847 |              |                                                                        | 0.2025 | 0.0052 |
| 17008088 | COX6A1       | cytochrome c oxidase subunit VIa polypeptide 1                         | 0.2198 | 0.0123 |
| 17008179 | FLJ45825     | uncharacterized LOC100505530                                           | 0.1308 | 0.037  |
| 17008216 |              |                                                                        | 0.3852 | 0.0487 |
| 17008463 | NCR2         | natural cytotoxicity triggering receptor 2                             | 0.1396 | 0.0142 |
| 17008542 |              |                                                                        | 0.1792 | 0.0009 |
| 17008928 | TTBK1        | tau tubulin kinase 1                                                   | 0.1212 | 0.0131 |
| 17009126 |              |                                                                        | 0.1917 | 0.0493 |
| 17009193 | SLC29A1      | solute carrier family 29 (nucleoside transporters), member 1           | 0.7065 | 0.0068 |
| 17009233 |              |                                                                        | 0.2072 | 0.0052 |
| 17009316 | ENPP4        | ectonucleotide pyrophosphatase/phosphodiesterase 4 (putative)          | 1.2184 | 0.0062 |
| 17009355 | TDRD6        | tudor domain containing 6                                              | 0.2345 | 0.0277 |
| 17009446 | GPR115       | G protein-coupled receptor 115                                         | 0.5484 | 0.0381 |
| 17009521 |              |                                                                        | 0.1787 | 0.0112 |
| 17009906 |              |                                                                        | 0.193  | 0.0245 |
| 17009993 |              |                                                                        | 0.1174 | 0.0344 |
| 17010002 |              |                                                                        | 0.1304 | 0.0392 |
| 17010173 |              |                                                                        | 0.3352 | 0.0267 |
| 17010273 | KCNQ5-IT1    | KCNQ5 intronic transcript 1 (non-protein coding)                       | 0.1641 | 0.0021 |
| 17010507 |              |                                                                        | 0.1727 | 0.0043 |
| 17010715 | CYB5R4       | cytochrome b5 reductase 4                                              | 0.4195 | 0.0175 |
| 17010737 |              |                                                                        | 0.1233 | 0.0382 |
| 17010830 | C6orf165     | chromosome 6 open reading frame 165                                    | 0.3534 | 0.0266 |
| 17010923 |              |                                                                        | 0.1705 | 0.0053 |
| 17011279 | PRDM1        | PR domain containing 1, with ZNF domain                                | 0.4723 | 0.0081 |
| 17011361 |              |                                                                        | 0.2741 | 0      |
| 17011365 | MIR587       | microRNA 587                                                           | 0.4773 | 0.0002 |
| 17011593 | FIG4         | FIG4 homolog, SAC1 lipid phosphatase domain containing (S. cerevisiae) | 0.322  | 0.0459 |
| 17011708 | SLC16A10     | solute carrier family 16, member 10 (aromatic amino acid transporter)  | 0.9291 | 0.0075 |
| 17011790 | RFPL4B       | ret finger protein-like 4B                                             | 0.3334 | 0.0072 |
| 17011800 | LOC100287612 | uncharacterized LOC100287612                                           | 0.2039 | 0.0089 |
| 17011814 |              |                                                                        | 0.118  | 0.0469 |
| 17012045 |              |                                                                        | 0.1953 | 0.0373 |
| 17012158 |              |                                                                        | 0.485  | 0.022  |
| 17012182 | PKIB         | protein kinase (cAMP-dependent, catalytic) inhibitor beta              | 0.2242 | 0.0072 |
| 17012223 | CLVS2        | clavesin 2                                                             | 1.6995 | 0.0003 |
| 17012233 |              |                                                                        | 0.8339 | 0.0003 |
| 17012245 | NKAIN2       | Na <sup>+</sup> /K <sup>+</sup> transporting ATPase interacting 2      | 0.326  | 0.0037 |
| 17012259 |              |                                                                        | 0.4128 | 0.0428 |
| 17012340 |              |                                                                        | 0.5268 | 0.0252 |
| 17012392 | RSPO3        | R-spondin 3                                                            | 0.2502 | 0.0478 |
| 17012442 |              |                                                                        | 0.1329 | 0.0281 |
| 17012672 |              |                                                                        | 0.1395 | 0.0116 |
| 17012676 | LOC100507254 | uncharacterized LOC100507254                                           | 0.1839 | 0.0348 |
| 17012761 | TCF21        | transcription factor 21                                                | 0.2526 | 0.0069 |
| 17012914 |              |                                                                        | 0.1572 | 0.0092 |
| 17012917 |              |                                                                        | 0.2229 | 0.0017 |
| 17013126 | GPR126       | G protein-coupled receptor 126                                         | 0.5042 | 0.002  |
| 17013672 |              |                                                                        | 0.1683 | 0.0413 |
| 17013856 | VIP          | vasoactive intestinal peptide                                          | 0.1366 | 0.0448 |
| 17013918 |              |                                                                        | 0.2395 | 0.0045 |
| 17014012 |              |                                                                        | 0.2438 | 0.0029 |
| 17014251 |              |                                                                        | 0.1757 | 0.0037 |

|          |              |                                                                                           |        |        |
|----------|--------------|-------------------------------------------------------------------------------------------|--------|--------|
| 17014286 |              |                                                                                           | 0.122  | 0.0311 |
| 17014599 |              |                                                                                           | 0.2056 | 0.0132 |
| 17014830 |              |                                                                                           | 0.1534 | 0.0223 |
| 17014959 |              |                                                                                           | 0.2393 | 0.0037 |
| 17015003 |              |                                                                                           | 0.1116 | 0.0412 |
| 17015331 | F13A1        | coagulation factor XIII, A1 polypeptide                                                   | 0.719  | 0.0479 |
| 17015371 |              |                                                                                           | 0.3076 | 0.0249 |
| 17015474 |              |                                                                                           | 0.1258 | 0.0057 |
| 17015493 |              |                                                                                           | 0.2396 | 0.0023 |
| 17015499 | OFCC1        | orofacial cleft 1 candidate 1                                                             | 0.1006 | 0.0474 |
| 17015805 |              |                                                                                           | 0.1362 | 0.02   |
| 17015817 |              |                                                                                           | 0.4018 | 0.0002 |
| 17015819 | DTNBP1       | dystrobrevin binding protein 1                                                            | 0.2494 | 0.0254 |
| 17015860 |              |                                                                                           | 0.3405 | 0.0012 |
| 17016017 |              |                                                                                           | 0.1905 | 0.0324 |
| 17016020 |              |                                                                                           | 0.1998 | 0.006  |
| 17016060 |              |                                                                                           | 0.1755 | 0.0084 |
| 17016254 |              |                                                                                           | 0.2039 | 0.0079 |
| 17016290 |              |                                                                                           | 0.1832 | 0.0171 |
| 17016522 |              |                                                                                           | 0.4447 | 0.0356 |
| 17016787 | RNF39        | ring finger protein 39                                                                    | 0.6051 | 0.0034 |
| 17016799 | TRIM31       | tripartite motif containing 31                                                            | 0.2574 | 0      |
| 17017043 |              |                                                                                           | 0.2663 | 0.0348 |
| 17017126 | HLA-C        | major histocompatibility complex, class I, C                                              | 0.6023 | 0.0006 |
| 17017142 |              |                                                                                           | 0.158  | 0.0259 |
| 17017403 | VWA7         | von Willebrand factor A domain containing 7                                               | 0.1249 | 0.0193 |
| 17017695 | RN5S206      | RNA, 5S ribosomal 206                                                                     | 0.2259 | 0.0331 |
| 17017852 | C6orf10      | chromosome 6 open reading frame 10                                                        | 0.2525 | 0.001  |
| 17017907 | HLA-DQB1     | major histocompatibility complex, class II, DQ beta 1                                     | 0.6409 | 0.009  |
| 17017926 | HLA-DQB2     | major histocompatibility complex, class II, DQ beta 2                                     | 0.5521 | 0.0022 |
| 17017965 | PSMB8        | proteasome (prosome, macropain) subunit, beta type, 8 (large multifunctional peptidase 7) | 0.4628 | 0.0116 |
| 17018011 | HLA-DMA      | major histocompatibility complex, class II, DM alpha                                      | 0.5523 | 0.0147 |
| 17018025 | HLA-DOA      | major histocompatibility complex, class II, DO alpha                                      | 0.7093 | 0.0054 |
| 17018039 | HLA-DPA1     | major histocompatibility complex, class II, DP alpha 1                                    | 0.6499 | 0.0139 |
| 17018256 | CUTA         | cutA divalent cation tolerance homolog (E. coli)                                          | 0.3536 | 0.0004 |
| 17018289 |              |                                                                                           | 0.3715 | 0.0118 |
| 17018476 | TULP1        | tubby like protein 1                                                                      | 0.1604 | 0.0097 |
| 17018871 | KIF6         | kinesin family member 6                                                                   | 0.2079 | 0.0451 |
| 17018971 |              |                                                                                           | 0.5859 | 0.0108 |
| 17019077 | TFEB         | transcription factor EB                                                                   | 0.2337 | 0.0048 |
| 17019530 | LOC285857    | uncharacterized LOC285857                                                                 | 0.1358 | 0.022  |
| 17019689 | ENPP5        | ectonucleotide pyrophosphatase/phosphodiesterase 5 (putative)                             | 1.192  | 0.0065 |
| 17019707 | CYP39A1      | cytochrome P450, family 39, subfamily A, polypeptide 1                                    | 0.7462 | 0.0382 |
| 17019724 | LOC100131283 | uncharacterized LOC100131283                                                              | 0.293  | 0.0133 |
| 17020059 | GSTA2        | glutathione S-transferase alpha 2                                                         | 1.8464 | 0.0333 |
| 17020069 | GSTA1        | glutathione S-transferase alpha 1                                                         | 2.077  | 0.0023 |
| 17020079 | GSTA5        | glutathione S-transferase alpha 5                                                         | 0.2836 | 0.0124 |
| 17020214 | KLHL31       | kelch-like 31 (Drosophila)                                                                | 0.6183 | 0.0201 |
| 17020234 |              |                                                                                           | 0.2772 | 0.0208 |
| 17020620 | LMBRD1       | LMBR1 domain containing 1                                                                 | 0.388  | 0.01   |
| 17020691 | B3GAT2       | beta-1,3-glucuronyltransferase 2 (glucuronosyltransferase S)                              | 0.2809 | 0.0082 |
| 17020700 |              |                                                                                           | 0.2773 | 0.0061 |
| 17020703 | LOC100507367 | uncharacterized LOC100507367                                                              | 0.3947 | 0.0163 |
| 17020731 |              |                                                                                           | 0.217  | 0.0375 |
| 17020771 | DPPA5        | developmental pluripotency associated 5                                                   | 0.2732 | 0.0007 |
| 17020823 | SLC17A5      | solute carrier family 17 (anion/sugar transporter), member 5                              | 0.7649 | 0.0048 |
| 17021281 | KIAA1009     | KIAA1009                                                                                  | 0.2956 | 0.0474 |

|          |          |                                                                                           |        |        |
|----------|----------|-------------------------------------------------------------------------------------------|--------|--------|
| 17021596 | RRAGD    | Ras-related GTP binding D                                                                 | 0.5594 | 0.0068 |
| 17021789 |          |                                                                                           | 0.526  | 0.0063 |
| 17021831 | GPR63    | G protein-coupled receptor 63                                                             | 0.5072 | 0.0133 |
| 17022211 |          |                                                                                           | 0.184  | 0.0182 |
| 17022949 |          |                                                                                           | 0.4717 | 0.0358 |
| 17023118 | FAM184A  | family with sequence similarity 184, member A                                             | 0.457  | 0.006  |
| 17023255 | TRDN     | triadin                                                                                   | 0.7192 | 0.011  |
| 17023296 |          |                                                                                           | 0.2693 | 0.0136 |
| 17023405 | THEMIS   | thymocyte selection associated                                                            | 0.2278 | 0.0202 |
| 17023716 | VNN3     | vanin 3                                                                                   | 0.1592 | 0.0373 |
| 17023868 |          |                                                                                           | 0.1284 | 0.0488 |
| 17024144 | IFNGR1   | interferon gamma receptor 1                                                               | 0.4493 | 0.0285 |
| 17024165 |          |                                                                                           | 0.1109 | 0.0255 |
| 17024278 |          |                                                                                           | 0.2913 | 0.0337 |
| 17024301 |          |                                                                                           | 0.2372 | 0.0007 |
| 17024308 | RN5S220  | RNA, 5S ribosomal 220                                                                     | 0.1222 | 0.011  |
| 17024329 |          |                                                                                           | 0.172  | 0.018  |
| 17024728 |          |                                                                                           | 0.2994 | 0.0003 |
| 17024772 |          |                                                                                           | 0.4229 | 0.0004 |
| 17025267 | SOD2     | superoxide dismutase 2, mitochondrial                                                     | 0.3108 | 0.026  |
| 17025666 | RNASET2  | ribonuclease T2                                                                           | 0.3099 | 0.0367 |
| 17026109 | HLA-A    | major histocompatibility complex, class I, A                                              | 0.5249 | 0.0025 |
| 17026272 | LST1     | leukocyte specific transcript 1                                                           | 0.3489 | 0.0001 |
| 17026444 | HLA-DPB1 | major histocompatibility complex, class II, DP beta 1                                     | 0.778  | 0.0034 |
| 17026460 | HLA-DPB2 | major histocompatibility complex, class II, DP beta 2 (pseudogene)                        | 0.6012 | 0.0043 |
| 17026593 | RNF39    | ring finger protein 39                                                                    | 0.6051 | 0.0034 |
| 17026762 | LTB      | lymphotoxin beta (TNF superfamily, member 3)                                              | 0.2808 | 0.0011 |
| 17026783 | VWA7     | von Willebrand factor A domain containing 7                                               | 0.1249 | 0.0193 |
| 17027082 | HLA-DRB3 | major histocompatibility complex, class II, DR beta 3                                     | 0.997  | 0.0007 |
| 17027091 | HLA-DQB2 | major histocompatibility complex, class II, DQ beta 2                                     | 0.5578 | 0.0003 |
| 17027130 | PSMB8    | proteasome (prosome, macropain) subunit, beta type, 8 (large multifunctional peptidase 7) | 0.4628 | 0.0116 |
| 17027187 | HLA-DPA1 | major histocompatibility complex, class II, DP alpha 1                                    | 0.6512 | 0.0134 |
| 17027217 | C6orf100 | chromosome 6 open reading frame 100                                                       | 0.206  | 0.0373 |
| 17027301 |          |                                                                                           | 0.4755 | 0.004  |
| 17027330 | HLA-G    | major histocompatibility complex, class I, G                                              | 0.4881 | 0.0001 |
| 17027344 | HLA-A    | major histocompatibility complex, class I, A                                              | 0.5249 | 0.0025 |
| 17027443 | HLA-E    | major histocompatibility complex, class I, E                                              | 0.8278 | 0.0003 |
| 17027581 | DDR1     | discoidin domain receptor tyrosine kinase 1                                               | 0.3945 | 0.0277 |
| 17027701 | PSORS1C1 | psoriasis susceptibility 1 candidate 1                                                    | 0.2576 | 0.0277 |
| 17027743 | HCP5     | HLA complex P5 (non-protein coding)                                                       | 0.9594 | 0.0004 |
| 17027749 | HCG26    | HLA complex group 26 (non-protein coding)                                                 | 1.0293 | 0.0007 |
| 17027801 | LST1     | leukocyte specific transcript 1                                                           | 0.362  | 0.0001 |
| 17027817 | AIF1     | allograft inflammatory factor 1                                                           | 0.5142 | 0.017  |
| 17028176 | C4B      | complement component 4B (Chido blood group)                                               | 1.1615 | 0.0062 |
| 17028313 | HLA-DRA  | major histocompatibility complex, class II, DR alpha                                      | 0.8758 | 0.0056 |
| 17028326 | HLA-DQA1 | major histocompatibility complex, class II, DQ alpha 1                                    | 1.5473 | 0.0001 |
| 17028338 | HLA-DQB1 | major histocompatibility complex, class II, DQ beta 1                                     | 0.772  | 0.0004 |
| 17028345 | HLA-DQA2 | major histocompatibility complex, class II, DQ alpha 2                                    | 0.9448 | 0.0002 |
| 17028585 | OR12D3   | olfactory receptor, family 12, subfamily D, member 3                                      | 0.1171 | 0.0484 |
| 17028680 | RNF39    | ring finger protein 39                                                                    | 0.4503 | 0.0084 |
| 17028909 | IER3     | immediate early response 3                                                                | 0.3335 | 0.0464 |
| 17029003 | HLA-C    | major histocompatibility complex, class I, C                                              | 0.6427 | 0.0004 |
| 17029082 | LTB      | lymphotoxin beta (TNF superfamily, member 3)                                              | 0.2808 | 0.0011 |
| 17029257 | VWA7     | von Willebrand factor A domain containing 7                                               | 0.142  | 0.0152 |
| 17029712 | HLA-DRB1 | major histocompatibility complex, class II, DR beta 1                                     | 0.8513 | 0.0006 |
| 17029721 | HLA-DQB1 | major histocompatibility complex, class II, DQ beta 1                                     | 0.7864 | 0.0014 |
| 17029735 | HLA-DQB2 | major histocompatibility complex, class II, DQ beta 2                                     | 0.5578 | 0.0003 |
| 17029774 | PSMB8    | proteasome (prosome, macropain) subunit, beta type, 8 (large multifunctional peptidase 7) | 0.4628 | 0.0116 |

|          |              |                                                                                           |        |        |
|----------|--------------|-------------------------------------------------------------------------------------------|--------|--------|
| 17029807 | HLA-DMB      | major histocompatibility complex, class II, DM beta                                       | 0.5087 | 0.0356 |
| 17029833 | HLA-DOA      | major histocompatibility complex, class II, DO alpha                                      | 0.6919 | 0.0038 |
| 17029847 | HLA-DPA1     | major histocompatibility complex, class II, DP alpha 1                                    | 0.6168 | 0.0151 |
| 17030098 | OR12D2       | olfactory receptor, family 12, subfamily D, member 2                                      | 0.1878 | 0.0192 |
| 17030147 |              |                                                                                           | 0.4893 | 0.0025 |
| 17030176 | HLA-G        | major histocompatibility complex, class I, G                                              | 0.4656 | 0.0001 |
| 17030188 | HLA-A        | major histocompatibility complex, class I, A                                              | 0.421  | 0.0163 |
| 17030288 | HLA-E        | major histocompatibility complex, class I, E                                              | 0.8278 | 0.0003 |
| 17030426 | DDR1         | discoidin domain receptor tyrosine kinase 1                                               | 0.4012 | 0.0236 |
| 17030575 | HCG26        | HLA complex group 26 (non-protein coding)                                                 | 1.0293 | 0.0007 |
| 17030627 | LST1         | leukocyte specific transcript 1                                                           | 0.3703 | 0.0001 |
| 17030643 | AIF1         | allograft inflammatory factor 1                                                           | 0.5327 | 0.0163 |
| 17030967 |              |                                                                                           | 0.8446 | 0.0139 |
| 17031045 | C4B          | complement component 4B (Chido blood group)                                               | 1.1728 | 0.0069 |
| 17031139 | HLA-DRA      | major histocompatibility complex, class II, DR alpha                                      | 0.9128 | 0.0049 |
| 17031153 | LOC100509457 | HLA class II histocompatibility antigen, DQ alpha 1 chain-like                            | 0.4167 | 0.0138 |
| 17031178 | HLA-DQA2     | major histocompatibility complex, class II, DQ alpha 2                                    | 0.9935 | 0.0001 |
| 17031219 | HLA-DPB1     | major histocompatibility complex, class II, DP beta 1                                     | 0.763  | 0.0044 |
| 17031373 | UBD          | ubiquitin D                                                                               | 0.2672 | 0.0061 |
| 17031459 | RNF39        | ring finger protein 39                                                                    | 0.6051 | 0.0034 |
| 17031469 | TRIM31       | tripartite motif containing 31                                                            | 0.2271 | 0.0001 |
| 17031687 | IER3         | immediate early response 3                                                                | 0.3335 | 0.0464 |
| 17031781 | HLA-C        | major histocompatibility complex, class I, C                                              | 0.5348 | 0.0064 |
| 17031867 | LTB          | lymphotoxin beta (TNF superfamily, member 3)                                              | 0.2808 | 0.0011 |
| 17032042 | VWA7         | von Willebrand factor A domain containing 7                                               | 0.1249 | 0.0193 |
| 17032389 | HLA-DRB3     | major histocompatibility complex, class II, DR beta 3                                     | 0.4908 | 0.0051 |
| 17032423 | HLA-DQB2     | major histocompatibility complex, class II, DQ beta 2                                     | 0.4811 | 0.0005 |
| 17032462 | PSMB8        | proteasome (prosome, macropain) subunit, beta type, 8 (large multifunctional peptidase 7) | 0.4628 | 0.0116 |
| 17032519 | HLA-DOA      | major histocompatibility complex, class II, DO alpha                                      | 0.7248 | 0.0045 |
| 17032533 | HLA-DPA1     | major histocompatibility complex, class II, DP alpha 1                                    | 0.6499 | 0.0139 |
| 17032753 | C6orf100     | chromosome 6 open reading frame 100                                                       | 0.206  | 0.0373 |
| 17032811 | LOC100507362 | uncharacterized LOC100507362                                                              | 0.1228 | 0.0495 |
| 17032837 |              |                                                                                           | 0.4893 | 0.0025 |
| 17032870 | HLA-G        | major histocompatibility complex, class I, G                                              | 0.4734 | 0      |
| 17032882 | HLA-A        | major histocompatibility complex, class I, A                                              | 0.3383 | 0.0083 |
| 17032957 | HLA-L        | major histocompatibility complex, class I, L (pseudogene)                                 | 0.7306 | 0.003  |
| 17032993 | HLA-E        | major histocompatibility complex, class I, E                                              | 0.8356 | 0.0003 |
| 17033131 | DDR1         | discoidin domain receptor tyrosine kinase 1                                               | 0.4215 | 0.0256 |
| 17033344 | LST1         | leukocyte specific transcript 1                                                           | 0.362  | 0.0001 |
| 17033604 | HLA-DRA      | major histocompatibility complex, class II, DR alpha                                      | 0.8762 | 0.0051 |
| 17033617 | LOC100509457 | HLA class II histocompatibility antigen, DQ alpha 1 chain-like                            | 0.3061 | 0.0327 |
| 17033646 | HLA-DQA2     | major histocompatibility complex, class II, DQ alpha 2                                    | 1.0224 | 0.0003 |
| 17033704 | HLA-DPB1     | major histocompatibility complex, class II, DP beta 1                                     | 0.7763 | 0.0033 |
| 17033915 | RNF39        | ring finger protein 39                                                                    | 0.581  | 0.0038 |
| 17033925 | TRIM31       | tripartite motif containing 31                                                            | 0.2314 | 0      |
| 17034143 | IER3         | immediate early response 3                                                                | 0.3335 | 0.0464 |
| 17034254 |              |                                                                                           | 0.6452 | 0.0025 |
| 17034339 | LTB          | lymphotoxin beta (TNF superfamily, member 3)                                              | 0.2808 | 0.0011 |
| 17034714 | HLA-DRB3     | major histocompatibility complex, class II, DR beta 3                                     | 0.479  | 0.0052 |
| 17034749 | HLA-DQB2     | major histocompatibility complex, class II, DQ beta 2                                     | 0.4483 | 0.0004 |
| 17034777 | PSMB8        | proteasome (prosome, macropain) subunit, beta type, 8 (large multifunctional peptidase 7) | 0.4628 | 0.0116 |
| 17034810 | HLA-DMB      | major histocompatibility complex, class II, DM beta                                       | 0.5011 | 0.047  |
| 17034837 | HLA-DOA      | major histocompatibility complex, class II, DO alpha                                      | 0.7248 | 0.0045 |
| 17034851 | HLA-DPA1     | major histocompatibility complex, class II, DP alpha 1                                    | 0.6512 | 0.0134 |
| 17034955 | C6orf100     | chromosome 6 open reading frame 100                                                       | 0.206  | 0.0373 |
| 17034996 | LOC100507362 | uncharacterized LOC100507362                                                              | 0.1228 | 0.0495 |

|          |              |                                                                                           |        |        |
|----------|--------------|-------------------------------------------------------------------------------------------|--------|--------|
| 17035022 | HLA-F        | major histocompatibility complex, class I, F                                              | 0.5213 | 0.0011 |
| 17035037 | HLA-G        | major histocompatibility complex, class I, G                                              | 0.4656 | 0.0001 |
| 17035049 | HLA-A        | major histocompatibility complex, class I, A                                              | 0.6045 | 0.0025 |
| 17035115 | HLA-E        | major histocompatibility complex, class I, E                                              | 0.8356 | 0.0003 |
| 17035371 | HCP5         | HLA complex P5 (non-protein coding)                                                       | 1.6983 | 0.0003 |
| 17035373 | HCG26        | HLA complex group 26 (non-protein coding)                                                 | 1.0293 | 0.0007 |
| 17035425 | LST1         | leukocyte specific transcript 1                                                           | 0.3703 | 0.0001 |
| 17035441 | AIF1         | allograft inflammatory factor 1                                                           | 0.5349 | 0.0177 |
| 17035749 | C4A          | complement component 4A (Rodgers blood group)                                             | 1.1674 | 0.006  |
| 17035880 | HLA-DRA      | major histocompatibility complex, class II, DR alpha                                      | 0.8781 | 0.0051 |
| 17035911 | HLA-DQB1     | major histocompatibility complex, class II, DQ beta 1                                     | 0.5762 | 0.0015 |
| 17035918 | HLA-DQA2     | major histocompatibility complex, class II, DQ alpha 2                                    | 0.9845 | 0.0002 |
| 17035971 | HLA-DPB1     | major histocompatibility complex, class II, DP beta 1                                     | 0.778  | 0.0034 |
| 17036198 | RNF39        | ring finger protein 39                                                                    | 0.6051 | 0.0034 |
| 17036208 | TRIM31       | tripartite motif containing 31                                                            | 0.2262 | 0.0001 |
| 17036486 | HLA-C        | major histocompatibility complex, class I, C                                              | 0.3462 | 0.0348 |
| 17036504 |              |                                                                                           | 0.5829 | 0.002  |
| 17036587 | LTB          | lymphotoxin beta (TNF superfamily, member 3)                                              | 0.2808 | 0.0011 |
| 17036760 | VWA7         | von Willebrand factor A domain containing 7                                               | 0.1249 | 0.0193 |
| 17037192 | HLA-DRB4     | major histocompatibility complex, class II, DR beta 4                                     | 0.5067 | 0.0265 |
| 17037218 | HLA-DQB2     | major histocompatibility complex, class II, DQ beta 2                                     | 0.4811 | 0.0005 |
| 17037257 | PSMB8        | proteasome (prosome, macropain) subunit, beta type, 8 (large multifunctional peptidase 7) | 0.4692 | 0.0141 |
| 17037303 | HLA-DMA      | major histocompatibility complex, class II, DM alpha                                      | 0.6229 | 0.0156 |
| 17037317 | HLA-DOA      | major histocompatibility complex, class II, DO alpha                                      | 0.7093 | 0.0054 |
| 17037331 | HLA-DPA1     | major histocompatibility complex, class II, DP alpha 1                                    | 0.6512 | 0.0134 |
| 17037557 | C6orf100     | chromosome 6 open reading frame 100                                                       | 0.206  | 0.0373 |
| 17037603 | LOC100507362 | uncharacterized LOC100507362                                                              | 0.1228 | 0.0495 |
| 17037629 |              |                                                                                           | 0.4893 | 0.0025 |
| 17037658 | HLA-G        | major histocompatibility complex, class I, G                                              | 0.4881 | 0.0001 |
| 17037670 | HLA-A        | major histocompatibility complex, class I, A                                              | 0.2847 | 0.0302 |
| 17037774 | HLA-E        | major histocompatibility complex, class I, E                                              | 0.8278 | 0.0003 |
| 17037907 | DDR1         | discoidin domain receptor tyrosine kinase 1                                               | 0.4215 | 0.0256 |
| 17038124 | LST1         | leukocyte specific transcript 1                                                           | 0.357  | 0.0003 |
| 17038140 | AIF1         | allograft inflammatory factor 1                                                           | 0.5142 | 0.017  |
| 17038462 |              |                                                                                           | 0.8534 | 0.0133 |
| 17038596 | HLA-DRA      | major histocompatibility complex, class II, DR alpha                                      | 0.8781 | 0.0051 |
| 17038609 | HLA-DQA1     | major histocompatibility complex, class II, DQ alpha 1                                    | 1.4368 | 0.0001 |
| 17038622 | HLA-DQB1     | major histocompatibility complex, class II, DQ beta 1                                     | 0.7723 | 0.0005 |
| 17038629 | HLA-DQA2     | major histocompatibility complex, class II, DQ alpha 2                                    | 0.9283 | 0.0003 |
| 17038687 | HLA-DPB1     | major histocompatibility complex, class II, DP beta 1                                     | 0.7594 | 0.0032 |
| 17038967 | TRIM31       | tripartite motif containing 31                                                            | 0.2544 | 0      |
| 17039184 | IER3         | immediate early response 3                                                                | 0.2805 | 0.037  |
| 17039199 | TIGD1L       | tigger transposable element derived 1-like                                                | 0.2964 | 0.0196 |
| 17039217 | CDSN         | corneodesmosin                                                                            | 0.3744 | 0.0497 |
| 17039281 | HLA-C        | major histocompatibility complex, class I, C                                              | 0.517  | 0.009  |
| 17039299 |              |                                                                                           | 0.6625 | 0.0011 |
| 17039380 | LTB          | lymphotoxin beta (TNF superfamily, member 3)                                              | 0.2808 | 0.0011 |
| 17039907 | HLA-DRB3     | major histocompatibility complex, class II, DR beta 3                                     | 0.9504 | 0.0013 |
| 17039914 | HLA-DRB1     | major histocompatibility complex, class II, DR beta 1                                     | 0.8513 | 0.0006 |
| 17039923 | HLA-DQB1     | major histocompatibility complex, class II, DQ beta 1                                     | 0.7864 | 0.0014 |
| 17039935 | HLA-DQB2     | major histocompatibility complex, class II, DQ beta 2                                     | 0.4483 | 0.0004 |
| 17039963 | PSMB8        | proteasome (prosome, macropain) subunit, beta type, 8 (large multifunctional peptidase 7) | 0.4628 | 0.0116 |
| 17039996 | HLA-DMB      | major histocompatibility complex, class II, DM beta                                       | 0.5011 | 0.047  |
| 17040023 | HLA-DOA      | major histocompatibility complex, class II, DO alpha                                      | 0.7021 | 0.0055 |
| 17040037 | HLA-DPA1     | major histocompatibility complex, class II, DP alpha 1                                    | 0.6572 | 0.0117 |
| 17040267 | C6orf100     | chromosome 6 open reading frame 100                                                       | 0.206  | 0.0373 |
| 17040325 | LOC100507362 | uncharacterized LOC100507362                                                              | 0.1228 | 0.0495 |
| 17040375 | HLA-G        | major histocompatibility complex, class I, G                                              | 0.5078 | 0      |
| 17040387 | HLA-A        | major histocompatibility complex, class I, A                                              | 0.5257 | 0.0221 |

|          |              |                                                                                           |        |        |
|----------|--------------|-------------------------------------------------------------------------------------------|--------|--------|
| 17040488 | HLA-E        | major histocompatibility complex, class I, E                                              | 0.8278 | 0.0003 |
| 17040665 | HCP5         | HLA complex P5 (non-protein coding)                                                       | 0.9578 | 0.0017 |
| 17040719 | LST1         | leukocyte specific transcript 1                                                           | 0.3455 | 0.0005 |
| 17040735 | AIF1         | allograft inflammatory factor 1                                                           | 0.5142 | 0.017  |
| 17041030 | C4B          | complement component 4B (Chido blood group)                                               | 1.1769 | 0.006  |
| 17041111 | C4B          | complement component 4B (Chido blood group)                                               | 1.1678 | 0.0065 |
| 17041225 | HLA-DRA      | major histocompatibility complex, class II, DR alpha                                      | 0.8781 | 0.0051 |
| 17041240 | LOC100509457 | HLA class II histocompatibility antigen, DQ alpha 1 chain-like                            | 0.5043 | 0.0271 |
| 17041260 | HLA-DQA2     | major histocompatibility complex, class II, DQ alpha 2                                    | 0.7885 | 0.0002 |
| 17041318 | HLA-DPB1     | major histocompatibility complex, class II, DP beta 1                                     | 0.763  | 0.0044 |
| 17041472 | OR11A1       | olfactory receptor, family 11, subfamily A, member 1                                      | 0.1103 | 0.0297 |
| 17041542 | RNF39        | ring finger protein 39                                                                    | 0.6051 | 0.0034 |
| 17041552 | TRIM31       | tripartite motif containing 31                                                            | 0.1882 | 0.0002 |
| 17041752 | IER3         | immediate early response 3                                                                | 0.3335 | 0.0464 |
| 17041759 | LINC00243    | long intergenic non-protein coding RNA 243                                                | 0.1808 | 0.0221 |
| 17041782 | HLA-C        | major histocompatibility complex, class I, C                                              | 0.4988 | 0.0082 |
| 17041800 |              |                                                                                           | 0.6658 | 0.0021 |
| 17041863 | LTB          | lymphotoxin beta (TNF superfamily, member 3)                                              | 0.2808 | 0.0011 |
| 17042035 | VWA7         | von Willebrand factor A domain containing 7                                               | 0.1249 | 0.0193 |
| 17042433 | HLA-DQB2     | major histocompatibility complex, class II, DQ beta 2                                     | 0.5608 | 0.0002 |
| 17042473 | PSMB8        | proteasome (prosome, macropain) subunit, beta type, 8 (large multifunctional peptidase 7) | 0.4628 | 0.0116 |
| 17042519 | HLA-DMA      | major histocompatibility complex, class II, DM alpha                                      | 0.5897 | 0.018  |
| 17042534 | HLA-DOA      | major histocompatibility complex, class II, DO alpha                                      | 0.7143 | 0.0042 |
| 17042548 | HLA-DPA1     | major histocompatibility complex, class II, DP alpha 1                                    | 0.6412 | 0.0147 |
| 17042648 | DAXX         | death-domain associated protein                                                           | 0.1366 | 0.0434 |
| 17042650 | CUTA         | cutA divalent cation tolerance homolog (E. coli)                                          | 0.3437 | 0.0005 |
| 17042671 |              |                                                                                           | 0.1859 | 0.0096 |
| 17042726 |              |                                                                                           | 0.1812 | 0.0288 |
| 17043312 | ZNF815P      | zinc finger protein 815, pseudogene                                                       | 0.2379 | 0.032  |
| 17043529 | C1GALT1      | core 1 synthase, glycoprotein-N-acetylgalactosamine 3-beta-galactosyltransferase, 1       | 0.4521 | 0.0221 |
| 17043550 | MIOS         | missing oocyte, meiosis regulator, homolog (Drosophila)                                   | 0.555  | 0.0016 |
| 17043573 | LOC729852    | uncharacterized LOC729852                                                                 | 0.2032 | 0.0482 |
| 17043622 | NXPH1        | neurexophilin 1                                                                           | 1.18   | 0.0016 |
| 17043727 | SCIN         | scinderin                                                                                 | 0.4746 | 0.0106 |
| 17043769 |              |                                                                                           | 0.2631 | 0.0083 |
| 17043856 | AHR          | aryl hydrocarbon receptor                                                                 | 0.648  | 0.0136 |
| 17043944 |              |                                                                                           | 0.2496 | 0.04   |
| 17043950 |              |                                                                                           | 0.2672 | 0.0224 |
| 17043953 |              |                                                                                           | 1.2439 | 0.0001 |
| 17043965 |              |                                                                                           | 0.2207 | 0.0049 |
| 17044315 | FAM221A      | family with sequence similarity 221, member A                                             | 0.3874 | 0.0435 |
| 17044647 |              |                                                                                           | 0.3229 | 0.0002 |
| 17044758 | C7orf41      | chromosome 7 open reading frame 41                                                        | 0.3705 | 0.0005 |
| 17044769 |              |                                                                                           | 0.3403 | 0.0065 |
| 17044773 | ZNRF2        | zinc and ring finger 2                                                                    | 0.3613 | 0.0039 |
| 17044795 | DKFZP5861420 | uncharacterized protein DKFZp5861420                                                      | 0.4451 | 0.0287 |
| 17044877 | GHRHR        | growth hormone releasing hormone receptor                                                 | 0.1842 | 0.0053 |
| 17044905 | ADCYAP1R1    | adenylate cyclase activating polypeptide 1 (pituitary) receptor type I                    | 0.4498 | 0.0197 |
| 17045258 | GPR141       | G protein-coupled receptor 141                                                            | 0.482  | 0      |
| 17045269 | NME8         | NME/NM23 family member 8                                                                  | 0.2533 | 0.014  |
| 17045303 | STARD3NL     | STARD3 N-terminal like                                                                    | 0.2822 | 0.0279 |
| 17045325 | POU6F2       | POU class 6 homeobox 2                                                                    | 0.1776 | 0.0308 |
| 17045369 | RALA         | v-ral simian leukemia viral oncogene homolog A (ras related)                              | 0.3257 | 0.0316 |
| 17045451 |              |                                                                                           | 0.1672 | 0.0289 |
| 17045542 | STK17A       | serine/threonine kinase 17a                                                               | 0.5063 | 0.0158 |
| 17045555 | BLVRA        | biliverdin reductase A                                                                    | 0.5991 | 0.0027 |

|          |              |                                                                                          |        |        |
|----------|--------------|------------------------------------------------------------------------------------------|--------|--------|
| 17045802 |              |                                                                                          | 0.1255 | 0.0417 |
| 17045851 |              |                                                                                          | 0.1667 | 0.0171 |
| 17046024 | VWC2         | von Willebrand factor C domain containing 2                                              | 0.3164 | 0.0144 |
| 17046041 | IKZF1        | IKAROS family zinc finger 1 (Ikaros)                                                     | 0.335  | 0.0111 |
| 17046072 |              |                                                                                          | 0.1904 | 0.0028 |
| 17046098 |              |                                                                                          | 0.1648 | 0.0077 |
| 17046407 | ZNF727       | zinc finger protein 727                                                                  | 0.8788 | 0.0303 |
| 17046453 |              |                                                                                          | 0.2825 | 0.0451 |
| 17046524 |              |                                                                                          | 0.3893 | 0.0418 |
| 17046664 | KCTD7        | potassium channel tetramerisation domain containing 7                                    | 0.3713 | 0.0219 |
| 17046834 | MIR3914-2    | microRNA 3914-2                                                                          | 0.1165 | 0.0134 |
| 17046935 | FZD9         | frizzled family receptor 9                                                               | 0.5445 | 0.0022 |
| 17047504 | HSPB1        | heat shock 27kDa protein 1                                                               | 0.6022 | 0.0067 |
| 17047593 |              |                                                                                          | 0.165  | 0.0325 |
| 17047650 |              |                                                                                          | 0.3554 | 0.0231 |
| 17048033 |              |                                                                                          | 0.3567 | 0.0193 |
| 17048039 |              |                                                                                          | 0.2011 | 0.0246 |
| 17048048 | ZNF804B      | zinc finger protein 804B                                                                 | 0.3115 | 0.0009 |
| 17048068 | DPY19L2P4    | dpy-19-like 2 pseudogene 4 (C. elegans)                                                  | 0.4026 | 0.0484 |
| 17048072 | STEAP1       | six transmembrane epithelial antigen of the prostate 1                                   | 0.5432 | 0.0012 |
| 17048083 | STEAP2       | STEAP family member 2, metalloredutase                                                   | 0.565  | 0.0019 |
| 17048102 | C7orf63      | chromosome 7 open reading frame 63                                                       | 0.549  | 0.0002 |
| 17048167 | CLDN12       | claudin 12                                                                               | 0.454  | 0.0122 |
| 17048190 | CDK14        | cyclin-dependent kinase 14                                                               | 0.8875 | 0.0005 |
| 17048223 | CLDN12       | claudin 12                                                                               | 1.2025 | 0.0041 |
| 17048244 |              |                                                                                          | 0.3934 | 0.0086 |
| 17048437 | GNGT1        | guanine nucleotide binding protein (G protein), gamma transducing activity polypeptide 1 | 0.1346 | 0.0242 |
| 17048639 | DYNC111      | dynein, cytoplasmic 1, intermediate chain 1                                              | 0.6368 | 0.0272 |
| 17048667 |              |                                                                                          | 0.27   | 0.0307 |
| 17048706 | LMTK2        | lemur tyrosine kinase 2                                                                  | 0.495  | 0.0245 |
| 17049330 | MEPCE        | methylphosphate capping enzyme                                                           | 0.3335 | 0.0354 |
| 17049366 | AGFG2        | ArfGAP with FG repeats 2                                                                 | 0.4842 | 0.0349 |
| 17049522 | SLC12A9      | solute carrier family 12 (potassium/chloride transporters), member 9                     | 0.199  | 0.0497 |
| 17049814 | ORAI2        | ORAI calcium release-activated calcium modulator 2                                       | 0.4194 | 0.0064 |
| 17050134 | PIK3CG       | phosphoinositide-3-kinase, catalytic, gamma polypeptide                                  | 0.3394 | 0.0421 |
| 17050328 | DNAJB9       | DnaJ (Hsp40) homolog, subfamily B, member 9                                              | 0.4288 | 0.0353 |
| 17050350 | LRRN3        | leucine rich repeat neuronal 3                                                           | 1.1722 | 0.0188 |
| 17050358 | LOC100506413 | uncharacterized LOC100506413                                                             | 0.3883 | 0.0103 |
| 17050455 | FOXP2        | forkhead box P2                                                                          | 0.7914 | 0.0166 |
| 17050495 | MIR3666      | microRNA 3666                                                                            | 0.31   | 0.0494 |
| 17050538 | CAV2         | caveolin 2                                                                               | 0.2885 | 0.0386 |
| 17050591 | MET          | met proto-oncogene (hepatocyte growth factor receptor)                                   | 2.4135 | 0      |
| 17050622 | CAPZA2       | capping protein (actin filament) muscle Z-line, alpha 2                                  | 0.3263 | 0.0096 |
| 17050761 |              |                                                                                          | 0.1248 | 0.0248 |
| 17050765 | KCND2        | potassium voltage-gated channel, Shal-related subfamily, member 2                        | 1.0873 | 0.0279 |
| 17050887 |              |                                                                                          | 0.2661 | 0.041  |
| 17050911 |              |                                                                                          | 0.6933 | 0.0004 |
| 17050988 | SPAM1        | sperm adhesion molecule 1 (PH-20 hyaluronidase, zona pellucida binding)                  | 0.1583 | 0.041  |
| 17051376 | TSPAN33      | tetraspanin 33                                                                           | 0.8633 | 0.0049 |
| 17051390 |              |                                                                                          | 0.4002 | 0.0413 |
| 17051409 | AHCYL2       | adenosylhomocysteinase-like 2                                                            | 0.4485 | 0.017  |
| 17051504 | KLHDC10      | kelch domain containing 10                                                               | 0.2219 | 0.0372 |
| 17051745 | EXOC4        | exocyst complex component 4                                                              | 0.2962 | 0.0098 |
| 17051827 | AKR1B10      | aldo-keto reductase family 1, member B10 (aldose reductase)                              | 0.4062 | 0.0034 |
| 17051950 |              |                                                                                          | 0.2625 | 0.0119 |



|          |              |                                                                                                 |        |        |
|----------|--------------|-------------------------------------------------------------------------------------------------|--------|--------|
| 17052083 | AKR1D1       | aldo-keto reductase family 1, member D1 (delta 4-3-ketosteroid-5-beta-reductase)                | 0.1429 | 0.0466 |
| 17052106 |              |                                                                                                 | 0.2023 | 0.0398 |
| 17052417 | TAS2R4       | taste receptor, type 2, member 4                                                                | 0.3286 | 0.0337 |
| 17052542 |              |                                                                                                 | 0.3785 | 0.0002 |
| 17052544 |              |                                                                                                 | 0.2288 | 0.0134 |
| 17052550 |              |                                                                                                 | 0.2422 | 0.0085 |
| 17052552 | LOC100124692 | maltase-glucoamylase (alpha-glucosidase) pseudogene                                             | 0.3964 | 0.0008 |
| 17052584 |              |                                                                                                 | 0.1543 | 0.0185 |
| 17052619 | TRBV20-1     | T cell receptor beta variable 20-1                                                              | 0.2668 | 0.0471 |
| 17052648 | TRBV29-1     | T cell receptor beta variable 29-1                                                              | 0.2912 | 0.0017 |
| 17052685 | TRBC2        | T cell receptor beta constant 2                                                                 | 1.0021 | 0.0001 |
| 17052859 | LOC100508781 | protein FAM115A-like                                                                            | 0.2533 | 0.0475 |
| 17052881 | OR2F2        | olfactory receptor, family 2, subfamily F, member 2                                             | 0.2439 | 0.0281 |
| 17052906 | OR2A12       | olfactory receptor, family 2, subfamily A, member 12                                            | 0.1031 | 0.036  |
| 17052935 | OR2A20P      | olfactory receptor, family 2, subfamily A, member 20 pseudogene                                 | 0.3167 | 0.0394 |
| 17053004 | LOC100507538 | uncharacterized LOC100507538                                                                    | 0.1496 | 0.0492 |
| 17053290 | ATP6V0E2     | ATPase, H+ transporting V0 subunit e2                                                           | 0.2325 | 0.0216 |
| 17053304 |              |                                                                                                 | 0.2821 | 0.0476 |
| 17053316 | LRRC61       | leucine rich repeat containing 61                                                               | 0.5007 | 0.0196 |
| 17053325 | C7orf29      | chromosome 7 open reading frame 29                                                              | 0.4145 | 0.0239 |
| 17053384 | GIMAP4       | GTPase, IMAP family member 4                                                                    | 0.3942 | 0.0393 |
| 17053393 | GIMAP2       | GTPase, IMAP family member 2                                                                    | 0.3435 | 0.0033 |
| 17053421 | TMEM176A     | transmembrane protein 176A                                                                      | 0.54   | 0.031  |
| 17053455 | NOS3         | nitric oxide synthase 3 (endothelial cell)                                                      | 0.2587 | 0.0342 |
| 17053553 | SLC4A2       | solute carrier family 4, anion exchanger, member 2 (erythrocyte membrane protein band 3-like 1) | 0.2522 | 0.0465 |
| 17053850 | LOC100132707 | uncharacterized LOC100132707                                                                    | 0.3965 | 0.0078 |
| 17054142 |              |                                                                                                 | 0.1694 | 0.0117 |
| 17054145 |              |                                                                                                 | 0.1497 | 0.018  |
| 17054439 | TMEM184A     | transmembrane protein 184A                                                                      | 0.6595 | 0.0065 |
| 17054527 |              |                                                                                                 | 0.1485 | 0.0458 |
| 17054685 |              |                                                                                                 | 0.2366 | 0.0016 |
| 17055006 | FAM220A      | family with sequence similarity 220, member A                                                   | 0.2438 | 0.0232 |
| 17055216 | ICA1         | islet cell autoantigen 1, 69kDa                                                                 | 0.3206 | 0.0265 |
| 17055295 | VWDE         | von Willebrand factor D and EGF domains                                                         | 0.524  | 0.0036 |
| 17055334 |              |                                                                                                 | 0.1675 | 0.0092 |
| 17055603 | MIR1302-6    | microRNA 1302-6                                                                                 | 0.3896 | 0.0048 |
| 17055605 |              |                                                                                                 | 0.1719 | 0.0255 |
| 17055614 | TWIST1       | twist homolog 1 (Drosophila)                                                                    | 0.7307 | 0.0008 |
| 17055640 | TMEM196      | transmembrane protein 196                                                                       | 0.5543 | 0.0004 |
| 17055649 |              |                                                                                                 | 0.5507 | 0.0057 |
| 17055684 |              |                                                                                                 | 0.3655 | 0.0117 |
| 17055888 |              |                                                                                                 | 0.1889 | 0.0489 |
| 17055910 | DFNA5        | deafness, autosomal dominant 5                                                                  | 0.7874 | 0.0003 |
| 17055937 | OSBPL3       | oxysterol binding protein-like 3                                                                | 0.7016 | 0.0005 |
| 17056060 | KIAA0087     | KIAA0087                                                                                        | 0.289  | 0.0053 |
| 17056248 | CPVL         | carboxypeptidase, vitellogenic-like                                                             | 0.589  | 0.0413 |
| 17056275 |              |                                                                                                 | 0.1339 | 0.0073 |
| 17056558 |              |                                                                                                 | 0.2455 | 0.0233 |
| 17056680 | KIAA0895     | KIAA0895                                                                                        | 0.4413 | 0.0085 |
| 17056701 | AOAH         | acyloxyacyl hydrolase (neutrophil)                                                              | 0.5644 | 0.006  |
| 17056734 | AOAH-IT1     | AOAH intronic transcript 1 (non-protein coding)                                                 | 0.1724 | 0.0215 |
| 17056813 | TARP         | TCR gamma alternate reading frame protein                                                       | 0.3044 | 0.0067 |
| 17056823 | TARP         | TCR gamma alternate reading frame protein                                                       | 0.3044 | 0.0067 |
| 17056830 | TRGV10       | T cell receptor gamma variable 10 (non-functional)                                              | 0.3122 | 0.0185 |
| 17056896 | VPS41        | vacuolar protein sorting 41 homolog (S. cerevisiae)                                             | 0.3968 | 0.0102 |
| 17056939 | POU6F2-AS2   | POU6F2 antisense RNA 2 (non-protein coding)                                                     | 0.1882 | 0.001  |
| 17056946 | POU6F2-AS1   | POU6F2 antisense RNA 1 (non-protein coding)                                                     | 0.1352 | 0.0099 |
| 17056973 |              |                                                                                                 | 0.3904 | 0.0059 |

|          |                |                                                                                        |        |        |
|----------|----------------|----------------------------------------------------------------------------------------|--------|--------|
| 17057496 |                |                                                                                        | 0.1411 | 0.0275 |
| 17057683 | ZBPB           | zona pellucida binding protein                                                         | 0.129  | 0.0379 |
| 17057852 |                |                                                                                        | 0.2    | 0.0456 |
| 17057859 |                |                                                                                        | 0.1581 | 0.0401 |
| 17057990 | NUPR1L         | nuclear protein, transcriptional regulator, 1-like                                     | 0.4025 | 0.019  |
| 17058015 |                |                                                                                        | 0.2171 | 0.0346 |
| 17058065 | LOC100509247   | uncharacterized LOC100509247                                                           | 0.2998 | 0.0224 |
| 17058104 |                |                                                                                        | 0.1681 | 0.0276 |
| 17058118 |                |                                                                                        | 0.1591 | 0.0335 |
| 17058365 | TRIM74         | tripartite motif containing 74                                                         | 0.8035 | 0.0014 |
| 17058445 | TRIM50         | tripartite motif containing 50                                                         | 0.7365 | 0.0075 |
| 17058912 | SRCRB4D        | scavenger receptor cysteine rich domain containing, group B (4 domains)                | 0.3334 | 0.0103 |
| 17058968 | FGL2           | fibrinogen-like 2                                                                      | 0.6046 | 0.0277 |
| 17058978 | PION           | pigeon homolog (Drosophila)                                                            | 0.4284 | 0.0311 |
| 17059096 |                |                                                                                        | 0.1712 | 0.025  |
| 17059165 | HGF            | hepatocyte growth factor (hepapoietin A; scatter factor)                               | 0.8462 | 0.0174 |
| 17059292 | SEMA3E         | sema domain, immunoglobulin domain (Ig), short basic domain, secreted, (semaphorin) 3E | 0.304  | 0.0472 |
| 17059318 |                |                                                                                        | 0.1574 | 0.0204 |
| 17059321 |                |                                                                                        | 0.128  | 0.0274 |
| 17059380 |                |                                                                                        | 0.3626 | 0.0202 |
| 17059383 |                |                                                                                        | 0.4253 | 0.0149 |
| 17059388 | KIAA1324L      | KIAA1324-like                                                                          | 1.0399 | 0.0163 |
| 17059427 | C7orf23        | chromosome 7 open reading frame 23                                                     | 0.279  | 0.0422 |
| 17059551 | SRI            | sorcin                                                                                 | 0.4606 | 0.0038 |
| 17059594 |                |                                                                                        | 0.3475 | 0.0233 |
| 17059603 |                |                                                                                        | 1.2125 | 0.0023 |
| 17059696 | ERVW-1         | endogenous retrovirus group W, member 1                                                | 0.3945 | 0      |
| 17059776 | SAMD9L         | sterile alpha motif domain containing 9-like                                           | 0.4568 | 0.0293 |
| 17059804 | CALCR          | calcitonin receptor                                                                    | 0.1567 | 0.0203 |
| 17059861 |                |                                                                                        | 0.3814 | 0.0027 |
| 17060014 | LOC100506136   | uncharacterized LOC100506136                                                           | 0.3425 | 0.0296 |
| 17060026 | SHFM1          | split hand/foot malformation (ectrodactyly) type 1                                     | 0.2426 | 0.0163 |
| 17060167 | TMEM130        | transmembrane protein 130                                                              | 0.5983 | 0.0094 |
| 17060287 | CYP3A5         | cytochrome P450, family 3, subfamily A, polypeptide 5                                  | 1.959  | 0.0002 |
| 17060317 | CYP3A7-CYP3AP1 | CYP3A7-CYP3AP1 readthrough                                                             | 1.1021 | 0.0026 |
| 17060337 | CYP3A4         | cytochrome P450, family 3, subfamily A, polypeptide 4                                  | 2.1861 | 0.0002 |
| 17060360 | TRIM4          | tripartite motif containing 4                                                          | 0.3997 | 0.0366 |
| 17060380 | AZGP1          | alpha-2-glycoprotein 1, zinc-binding                                                   | 0.1397 | 0.0151 |
| 17060444 | MIR93          | microRNA 93                                                                            | 0.2831 | 0.011  |
| 17060554 |                |                                                                                        | 0.2182 | 0.0069 |
| 17060592 | C7orf61        | chromosome 7 open reading frame 61                                                     | 0.1267 | 0.0303 |
| 17060599 | TSC22D4        | TSC22 domain family, member 4                                                          | 0.5171 | 0.002  |
| 17060627 | LRCH4          | leucine-rich repeats and calponin homology (CH) domain containing 4                    | 0.381  | 0.0125 |
| 17060923 | RABL5          | RAB, member RAS oncogene family-like 5                                                 | 0.3042 | 0.0283 |
| 17060972 |                |                                                                                        | 0.2124 | 0.0038 |
| 17061757 |                |                                                                                        | 0.3102 | 0.028  |
| 17061759 | NRCAM          | neuronal cell adhesion molecule                                                        | 1.5724 | 0.0021 |
| 17061843 |                |                                                                                        | 0.2476 | 0.0107 |
| 17061853 |                |                                                                                        | 0.349  | 0.0052 |
| 17061859 | IMMP2L         | IMP2 inner mitochondrial membrane peptidase-like (S. cerevisiae)                       | 0.4101 | 0.0394 |
| 17061879 |                |                                                                                        | 0.8745 | 0.0249 |
| 17061881 | DOCK4          | dedicator of cytokinesis 4                                                             | 0.6854 | 0.0012 |
| 17061949 | RN5S237        | RNA, 5S ribosomal 237                                                                  | 0.3811 | 0.0433 |
| 17061983 |                |                                                                                        | 0.1538 | 0.0187 |
| 17062013 | PPP1R3A        | protein phosphatase 1, regulatory subunit 3A                                           | 0.1098 | 0.0459 |
| 17062039 |                |                                                                                        | 0.4053 | 0.0058 |
| 17062049 | TFEC           | transcription factor EC                                                                | 0.3605 | 0.0088 |

|          |              |                                                                      |        |        |
|----------|--------------|----------------------------------------------------------------------|--------|--------|
| 17062112 | ST7-AS2      | ST7 antisense RNA 2 (non-protein coding)                             | 0.3116 | 0.0009 |
| 17062402 | IQUB         | IQ motif and ubiquitin domain containing                             | 1.0935 | 0      |
| 17062906 | COPG2        | coatamer protein complex, subunit gamma 2                            | 0.3942 | 0.0164 |
| 17062915 | TSGA13       | testis specific, 13                                                  | 0.3449 | 0.0007 |
| 17062955 | FLJ43663     | uncharacterized LOC378805                                            | 0.4808 | 0.038  |
| 17063073 | SLC35B4      | solute carrier family 35, member B4                                  | 0.2836 | 0.0455 |
| 17063121 | C7orf49      | chromosome 7 open reading frame 49                                   | 0.323  | 0.0198 |
| 17063681 | KIAA1147     | KIAA1147                                                             | 0.4019 | 0.0249 |
| 17063708 | PRSS37       | protease, serine, 37                                                 | 0.2681 | 0.0253 |
| 17063770 | TRBV5-7      | T cell receptor beta variable 5-7 (non-functional)                   | 0.188  | 0.0157 |
| 17063776 | TRBV6-8      | T cell receptor beta variable 6-8                                    | 0.1856 | 0.044  |
| 17063948 | EPHA1        | EPH receptor A1                                                      | 0.1556 | 0.0072 |
| 17063981 | FAM115A      | family with sequence similarity 115, member A                        | 0.3828 | 0.0412 |
| 17064002 | OR2A20P      | olfactory receptor, family 2, subfamily A, member 20 pseudogene      | 0.3007 | 0.0424 |
| 17064054 | TPK1         | thiamin pyrophosphokinase 1                                          | 0.3843 | 0.0114 |
| 17064226 |              |                                                                      | 0.5379 | 0.0037 |
| 17064230 |              |                                                                      | 1.0268 | 0.006  |
| 17064235 | ACTR3C       | ARP3 actin-related protein 3 homolog C (yeast)                       | 0.9659 | 0.0041 |
| 17064249 |              |                                                                      | 0.3628 | 0.0081 |
| 17064285 | TMEM176B     | transmembrane protein 176B                                           | 0.712  | 0.0111 |
| 17064299 | KCNH2        | potassium voltage-gated channel, subfamily H (eag-related), member 2 | 0.9705 | 0.0027 |
| 17064325 | ATG9B        | autophagy related 9B                                                 | 0.3342 | 0.0063 |
| 17064698 |              |                                                                      | 0.3836 | 0.0001 |
| 17064934 |              |                                                                      | 0.2072 | 0.0305 |
| 17065284 |              |                                                                      | 0.16   | 0.0444 |
| 17065330 | MIR4659A     | microRNA 4659a                                                       | 0.4151 | 0.0364 |
| 17065332 | LOC100652791 | uncharacterized LOC100652791                                         | 0.165  | 0.0169 |
| 17065347 | FAM90A7P     | family with sequence similarity 90, member A7, pseudogene            | 0.2216 | 0.0057 |
| 17065352 | FAM90A7P     | family with sequence similarity 90, member A7, pseudogene            | 0.2095 | 0.0099 |
| 17065357 | FAM90A7P     | family with sequence similarity 90, member A7, pseudogene            | 0.2216 | 0.0057 |
| 17065362 | FAM90A7P     | family with sequence similarity 90, member A7, pseudogene            | 0.1964 | 0.0188 |
| 17065367 | FAM90A20P    | family with sequence similarity 90, member A20, pseudogene           | 0.1743 | 0.0398 |
| 17065372 | DEFB109P1B   | defensin, beta 109, pseudogene 1B                                    | 0.6236 | 0.0258 |
| 17065398 | FAM90A7P     | family with sequence similarity 90, member A7, pseudogene            | 0.211  | 0.0054 |
| 17065403 | FAM90A7P     | family with sequence similarity 90, member A7, pseudogene            | 0.1889 | 0.022  |
| 17065408 | FAM90A7P     | family with sequence similarity 90, member A7, pseudogene            | 0.1899 | 0.0137 |
| 17065413 | FAM90A7P     | family with sequence similarity 90, member A7, pseudogene            | 0.1889 | 0.022  |
| 17065418 | FAM90A10P    | family with sequence similarity 90, member A10, pseudogene           | 0.1825 | 0.0131 |
| 17065423 | FAM90A10P    | family with sequence similarity 90, member A10, pseudogene           | 0.2892 | 0.0029 |
| 17065463 | LOC100132396 | zinc finger protein 705D-like                                        | 0.1478 | 0.0446 |
| 17065473 | FAM66E       | family with sequence similarity 66, member E                         | 0.4643 | 0.0258 |
| 17065513 | CLDN23       | claudin 23                                                           | 0.305  | 0.0474 |
| 17065517 |              |                                                                      | 0.2121 | 0.0077 |
| 17065521 |              |                                                                      | 0.3227 | 0.0054 |
| 17065655 |              |                                                                      | 0.2381 | 0.0041 |
| 17065956 |              |                                                                      | 0.1691 | 0.0118 |
| 17066183 | NAT1         | N-acetyltransferase 1 (arylamine N-acetyltransferase)                | 0.384  | 0.0029 |
| 17066220 |              |                                                                      | 0.1187 | 0.003  |

|          |           |                                                            |        |        |
|----------|-----------|------------------------------------------------------------|--------|--------|
| 17066302 | ATP6V1B2  | ATPase, H+ transporting, lysosomal 56/58kDa, V1 subunit B2 | 0.5323 | 0.0038 |
| 17066346 |           |                                                            | 0.1578 | 0.0283 |
| 17066446 | EPB49     | erythrocyte membrane protein band 4.9 (dematin)            | 0.7116 | 0.001  |
| 17066601 | SLC39A14  | solute carrier family 39 (zinc transporter), member 14     | 0.4466 | 0.0006 |
| 17066894 |           |                                                            | 0.4182 | 0.0112 |
| 17066921 | ADAM28    | ADAM metalloproteinase domain 28                           | 0.5568 | 0.0064 |
| 17067011 | NEFM      | neurofilament, medium polypeptide                          | 1.4093 | 0.0105 |
| 17067326 | MIR3622A  | microRNA 3622a                                             | 0.2652 | 0.0002 |
| 17067410 | FZD3      | frizzled family receptor 3                                 | 0.7794 | 0.0192 |
| 17067424 | EXTL3     | exostoses (multiple)-like 3                                | 0.2679 | 0.0227 |
| 17067611 | RNU5A-3P  | RNA, U5A small nuclear 3, pseudogene                       | 0.1702 | 0.0385 |
| 17067996 |           |                                                            | 0.2513 | 0.0042 |
| 17068238 | ADAM5P    | ADAM metalloproteinase domain 5, pseudogene                | 0.1552 | 0.029  |
| 17068338 |           |                                                            | 0.3095 | 0.0078 |
| 17068778 |           |                                                            | 0.1602 | 0.0282 |
| 17068900 |           |                                                            | 0.2134 | 0.0276 |
| 17068924 |           |                                                            | 0.1758 | 0.0451 |
| 17069063 | LYN       | v-src-1 Yamaguchi sarcoma viral related oncogene homolog   | 0.4943 | 0.0163 |
| 17069087 | CHCHD7    | coiled-coil-helix-coiled-coil-helix domain containing 7    | 0.244  | 0.0263 |
| 17069325 |           |                                                            | 0.1409 | 0.0426 |
| 17069431 |           |                                                            | 0.176  | 0.0201 |
| 17069444 |           |                                                            | 0.1439 | 0.026  |
| 17069467 | BHLHE22   | basic helix-loop-helix family, member e22                  | 0.219  | 0.0005 |
| 17069471 |           |                                                            | 0.584  | 0.0329 |
| 17069473 |           |                                                            | 0.1448 | 0.0455 |
| 17069603 |           |                                                            | 0.1722 | 0.0462 |
| 17069782 | C8orf34   | chromosome 8 open reading frame 34                         | 0.2007 | 0.0236 |
| 17069879 |           |                                                            | 0.1675 | 0.0282 |
| 17069926 |           |                                                            | 0.1252 | 0.0236 |
| 17069971 | RN5S271   | RNA, 5S ribosomal 271                                      | 0.1609 | 0.004  |
| 17070061 | LY96      | lymphocyte antigen 96                                      | 0.7455 | 0.0057 |
| 17070221 | PKIA      | protein kinase (cAMP-dependent, catalytic) inhibitor alpha | 0.2581 | 0.0427 |
| 17070242 |           |                                                            | 0.6342 | 0.0029 |
| 17070317 |           |                                                            | 0.1732 | 0.0043 |
| 17070352 |           |                                                            | 0.4264 | 0.0388 |
| 17070355 |           |                                                            | 0.1538 | 0.024  |
| 17070589 | CNBD1     | cyclic nucleotide binding domain containing 1              | 0.1022 | 0.0297 |
| 17070653 | OSGIN2    | oxidative stress induced growth inhibitor family member 2  | 0.4394 | 0.0061 |
| 17070798 |           |                                                            | 0.2029 | 0.0175 |
| 17071115 |           |                                                            | 0.2016 | 0.0474 |
| 17071162 | CPQ       | carboxypeptidase Q                                         | 0.4259 | 0.0018 |
| 17071478 |           |                                                            | 0.244  | 0.0182 |
| 17071497 | GRHL2     | grainyhead-like 2 (Drosophila)                             | 0.1684 | 0.0021 |
| 17071521 |           |                                                            | 0.6883 | 0.0279 |
| 17071620 | MIR3151   | microRNA 3151                                              | 0.3513 | 0.0015 |
| 17072162 | COL14A1   | collagen, type XIV, alpha 1                                | 1.6042 | 0.0003 |
| 17072269 |           |                                                            | 0.1692 | 0.0353 |
| 17072396 |           |                                                            | 0.1519 | 0.0347 |
| 17072439 | FER1L6    | fer-1-like 6 (C. elegans)                                  | 0.1705 | 0.0187 |
| 17073034 |           |                                                            | 0.3941 | 0.0041 |
| 17073130 |           |                                                            | 0.1873 | 0.0107 |
| 17073163 |           |                                                            | 0.1003 | 0.0496 |
| 17073166 | MIR4472-1 | microRNA 4472-1                                            | 0.2734 | 0.0236 |
| 17073247 |           |                                                            | 0.9152 | 0.0017 |
| 17073754 | SCXA      | scleraxis homolog A (mouse)                                | 0.5212 | 0.0346 |
| 17074007 | OR4F21    | olfactory receptor, family 4, subfamily F, member 21       | 0.1941 | 0.0371 |
| 17074225 |           |                                                            | 0.1734 | 0.0129 |

|          |              |                                                            |        |        |
|----------|--------------|------------------------------------------------------------|--------|--------|
| 17074342 |              |                                                            | 0.5568 | 0.0069 |
| 17074400 | FAM90A7P     | family with sequence similarity 90, member A7, pseudogene  | 0.2164 | 0.0188 |
| 17074427 | DEFB109P1B   | defensin, beta 109, pseudogene 1B                          | 0.6236 | 0.0258 |
| 17074430 | FAM90A12P    | family with sequence similarity 90, member A12, pseudogene | 0.2707 | 0.0062 |
| 17074462 |              |                                                            | 0.1741 | 0.0332 |
| 17074510 |              |                                                            | 0.1293 | 0.0236 |
| 17074512 |              |                                                            | 0.1896 | 0.0141 |
| 17074539 |              |                                                            | 0.2517 | 0.0024 |
| 17074541 |              |                                                            | 0.1143 | 0.0411 |
| 17074547 |              |                                                            | 0.1773 | 0.0383 |
| 17074773 | DEFB109P1    | defensin, beta 109, pseudogene 1                           | 0.6783 | 0.0328 |
| 17074776 | FAM90A2P     | family with sequence similarity 90, member A2, pseudogene  | 0.3419 | 0.0058 |
| 17074893 |              |                                                            | 0.1526 | 0.0104 |
| 17075082 | ASAH1        | N-acylsphingosine amidohydrolase (acid ceramidase) 1       | 0.5257 | 0.0048 |
| 17075153 | LOC100128993 | uncharacterized LOC100128993                               | 0.1972 | 0.0179 |
| 17075168 | CSGALNACT1   | chondroitin sulfate N-acetylgalactosaminyltransferase 1    | 0.5468 | 0.0069 |
| 17075198 | SLC18A1      | solute carrier family 18 (vesicular monoamine), member 1   | 0.1368 | 0.0316 |
| 17075243 |              |                                                            | 0.162  | 0.0413 |
| 17075405 | PEBP4        | phosphatidylethanolamine-binding protein 4                 | 0.618  | 0.0072 |
| 17075534 |              |                                                            | 0.1067 | 0.0099 |
| 17075569 |              |                                                            | 0.1483 | 0.0328 |
| 17075849 |              |                                                            | 0.2976 | 0.0004 |
| 17075852 | FBXO16       | F-box protein 16                                           | 0.6489 | 0.0003 |
| 17075883 | INTS9        | integrator complex subunit 9                               | 0.3372 | 0.0335 |
| 17075992 | LINC00589    | long intergenic non-protein coding RNA 589                 | 0.196  | 0.0462 |
| 17076000 |              |                                                            | 0.2277 | 0.0032 |
| 17076038 |              |                                                            | 0.4745 | 0.0479 |
| 17076215 |              |                                                            | 0.1504 | 0.0459 |
| 17076810 | CHRNA6       | cholinergic receptor, nicotinic, alpha 6 (neuronal)        | 0.9502 | 0.0434 |
| 17077188 |              |                                                            | 0.1938 | 0.0031 |
| 17077590 |              |                                                            | 0.113  | 0.0177 |
| 17077723 | CYP7B1       | cytochrome P450, family 7, subfamily B, polypeptide 1      | 1.0049 | 0.0011 |
| 17077734 |              |                                                            | 0.247  | 0.0005 |
| 17077871 | PPP1R42      | protein phosphatase 1, regulatory subunit 42               | 0.1828 | 0.0184 |
| 17077996 | LOC286189    | uncharacterized LOC286189                                  | 0.2209 | 0.0037 |
| 17078290 |              |                                                            | 0.2653 | 0.0014 |
| 17078386 |              |                                                            | 0.3053 | 0.0236 |
| 17078426 |              |                                                            | 0.185  | 0.036  |
| 17078434 | IL7          | interleukin 7                                              | 0.4892 | 0.0059 |
| 17078493 | TPD52        | tumor protein D52                                          | 0.2604 | 0.0012 |
| 17078527 |              |                                                            | 0.2027 | 0.012  |
| 17078856 |              |                                                            | 0.1603 | 0.0448 |
| 17078867 |              |                                                            | 0.1711 | 0.028  |
| 17079132 | C8orf87      | chromosome 8 open reading frame 87                         | 0.1179 | 0.0262 |
| 17079176 |              |                                                            | 0.1386 | 0.0439 |
| 17079187 | CDH17        | cadherin 17, LI cadherin (liver-intestine)                 | 0.3125 | 0.0284 |
| 17079405 |              |                                                            | 0.1979 | 0.0162 |
| 17079544 | RGS22        | regulator of G-protein signaling 22                        | 0.6726 | 0.012  |
| 17080000 | DPYS         | dihydropyrimidinase                                        | 0.4367 | 0.001  |
| 17080042 |              |                                                            | 0.2124 | 0.0468 |
| 17080097 |              |                                                            | 0.2288 | 0.0032 |
| 17080480 |              |                                                            | 0.3252 | 0.0002 |
| 17080788 | FBXO32       | F-box protein 32                                           | 1.0965 | 0.0002 |
| 17081106 | GSDMC        | gasdermin C                                                | 0.1595 | 0.0129 |
| 17081321 | HPYR1        | Helicobacter pylori responsive 1 (non-protein coding)      | 0.1761 | 0.0007 |
| 17081323 | LRRC6        | leucine rich repeat containing 6                           | 0.3926 | 0.0422 |
| 17081822 |              |                                                            | 0.2321 | 0.0195 |

|          |              |                                                                                       |        |        |
|----------|--------------|---------------------------------------------------------------------------------------|--------|--------|
| 17081915 |              |                                                                                       | 0.2214 | 0.0127 |
| 17081957 | LYNX1        | Ly6/neurotoxin 1                                                                      | 0.4147 | 0.0385 |
| 17081974 | LY6D         | lymphocyte antigen 6 complex, locus D                                                 | 0.9801 | 0.0019 |
| 17082012 | LOC100133669 | uncharacterized LOC100133669                                                          | 0.4906 | 0.0261 |
| 17082023 | LY6H         | lymphocyte antigen 6 complex, locus H                                                 | 0.1985 | 0.0167 |
| 17082081 | RHPN1-AS1    | RHPN1 antisense RNA 1 (non-protein coding)                                            | 0.2522 | 0.0352 |
| 17082762 |              |                                                                                       | 0.1315 | 0.0075 |
| 17082969 |              |                                                                                       | 0.2179 | 0.0362 |
| 17083091 |              |                                                                                       | 0.5531 | 0.0207 |
| 17083357 | CD274        | CD274 molecule                                                                        | 0.2467 | 0.0423 |
| 17084228 |              |                                                                                       | 0.1514 | 0.0232 |
| 17084230 | TMEM215      | transmembrane protein 215                                                             | 0.1188 | 0.0238 |
| 17084448 | DNAI1        | dynein, axonemal, intermediate chain 1                                                | 0.1245 | 0.0394 |
| 17085808 |              |                                                                                       | 0.1995 | 0.0049 |
| 17085811 |              |                                                                                       | 0.1995 | 0.0049 |
| 17085901 | ANXA1        | annexin A1                                                                            | 0.6829 | 0.041  |
| 17085942 |              |                                                                                       | 0.2442 | 0.0078 |
| 17085993 |              |                                                                                       | 0.166  | 0.0283 |
| 17085996 |              |                                                                                       | 0.1674 | 0.0034 |
| 17086160 |              |                                                                                       | 0.2577 | 0.0011 |
| 17086293 |              |                                                                                       | 0.1782 | 0.0416 |
| 17086330 |              |                                                                                       | 0.2506 | 0.0067 |
| 17086632 |              |                                                                                       | 0.3622 | 0.0001 |
| 17086708 | SYK          | spleen tyrosine kinase                                                                | 0.3134 | 0.0282 |
| 17086981 |              |                                                                                       | 0.1593 | 0.0419 |
| 17087025 |              |                                                                                       | 0.7017 | 0.002  |
| 17087329 | TMOD1        | tropomodulin 1                                                                        | 0.9189 | 0.0349 |
| 17087785 |              |                                                                                       | 0.1763 | 0.0421 |
| 17088527 | TLR4         | toll-like receptor 4                                                                  | 0.6153 | 0.0328 |
| 17088730 | MORN5        | MORN repeat containing 5                                                              | 0.1664 | 0.0468 |
| 17088760 | PTGS1        | prostaglandin-endoperoxide synthase 1 (prostaglandin G/H synthase and cyclooxygenase) | 0.2914 | 0.0443 |
| 17088809 | OR1Q1        | olfactory receptor, family 1, subfamily Q, member 1                                   | 0.1054 | 0.0165 |
| 17089365 |              |                                                                                       | 0.4664 | 0.0023 |
| 17089622 | TMSB4XP4     | thymosin beta 4, X-linked pseudogene 4                                                | 0.2644 | 0.0269 |
| 17090032 |              |                                                                                       | 0.3672 | 0      |
| 17090625 | C9orf171     | chromosome 9 open reading frame 171                                                   | 0.1464 | 0.0494 |
| 17090670 | GFI1B        | growth factor independent 1B transcription repressor                                  | 0.1338 | 0.0253 |
| 17090713 | CEL          | carboxyl ester lipase (bile salt-stimulated lipase)                                   | 0.7121 | 0.0039 |
| 17090727 | CELP         | carboxyl ester lipase pseudogene                                                      | 0.1949 | 0.003  |
| 17090735 |              |                                                                                       | 1.1298 | 0.0009 |
| 17091065 |              |                                                                                       | 0.1538 | 0.0189 |
| 17091069 |              |                                                                                       | 0.1899 | 0.021  |
| 17091074 | C9orf62      | chromosome 9 open reading frame 62                                                    | 0.1931 | 0.0054 |
| 17091110 | LCN1         | lipocalin 1                                                                           | 0.188  | 0.0486 |
| 17091517 | LCNL1        | lipocalin-like 1                                                                      | 0.1879 | 0.011  |
| 17091917 | FAM138C      | family with sequence similarity 138, member C                                         | 0.1428 | 0.0438 |
| 17091993 |              |                                                                                       | 0.2213 | 0.0306 |
| 17092001 |              |                                                                                       | 0.2614 | 0.0023 |
| 17092177 | RLN2         | relaxin 2                                                                             | 0.1901 | 0.0149 |
| 17092258 |              |                                                                                       | 0.2493 | 0.009  |
| 17092671 |              |                                                                                       | 0.2112 | 0.0077 |
| 17092790 |              |                                                                                       | 0.1943 | 0.0281 |
| 17092819 | IFNA21       | interferon, alpha 21                                                                  | 0.1481 | 0.0078 |
| 17093081 |              |                                                                                       | 0.2899 | 0.0146 |
| 17093424 | C9orf24      | chromosome 9 open reading frame 24                                                    | 0.1974 | 0.0168 |
| 17093455 | ENHO         | energy homeostasis associated                                                         | 0.1667 | 0.0329 |
| 17094163 |              |                                                                                       | 0.1714 | 0.0299 |
| 17094368 | LOC100132439 | protein FAM27E3-like                                                                  | 0.4845 | 0.0036 |
| 17094920 |              |                                                                                       | 0.2011 | 0.0106 |
| 17094933 |              |                                                                                       | 0.1215 | 0.0322 |

|          |            |                                                                                    |        |        |
|----------|------------|------------------------------------------------------------------------------------|--------|--------|
| 17094936 |            |                                                                                    | 0.1393 | 0.0073 |
| 17095098 | GNA14      | guanine nucleotide binding protein (G protein), alpha 14                           | 0.7347 | 0.0006 |
| 17095147 |            |                                                                                    | 0.1619 | 0.0484 |
| 17095410 |            |                                                                                    | 0.2111 | 0.0107 |
| 17095522 |            |                                                                                    | 0.2067 | 0.0113 |
| 17095547 |            |                                                                                    | 0.1352 | 0.0357 |
| 17095630 |            |                                                                                    | 0.1603 | 0.0311 |
| 17095638 | MIR4290    | microRNA 4290                                                                      | 0.2994 | 0.0006 |
| 17095772 |            |                                                                                    | 0.3552 | 0.0038 |
| 17095959 | NINJ1      | ninjurin 1                                                                         | 0.4057 | 0.0146 |
| 17096457 | CORO2A     | coronin, actin binding protein, 2A                                                 | 0.5286 | 0.0029 |
| 17096819 |            |                                                                                    | 0.1073 | 0.0277 |
| 17097366 |            |                                                                                    | 0.1818 | 0.0195 |
| 17097369 | ZNF883     | zinc finger protein 883                                                            | 0.7544 | 0.0002 |
| 17098477 | ANGPTL2    | angiopoietin-like 2                                                                | 0.7304 | 0.0078 |
| 17099174 | FAM78A     | family with sequence similarity 78, member A                                       | 0.1569 | 0.0198 |
| 17099338 | AK8        | adenylate kinase 8                                                                 | 0.2015 | 0.0447 |
| 17099400 |            |                                                                                    | 0.8496 | 0.011  |
| 17099436 | GBGT1      | globoside alpha-1,3-N-acetylgalactosaminyltransferase 1                            | 0.6477 | 0.0046 |
| 17100073 | MIR4673    | microRNA 4673                                                                      | 0.2576 | 0.0199 |
| 17100287 | NPDC1      | neural proliferation, differentiation and control, 1                               | 0.2397 | 0.0318 |
| 17100655 |            |                                                                                    | 0.716  | 0.0166 |
| 17100681 | ND5        | NADH dehydrogenase, subunit 5 (complex I)                                          | 0.1104 | 0.0037 |
| 17100683 | CYTB       | cytochrome b                                                                       | 0.1031 | 0.0231 |
| 17100697 | ND6        | NADH dehydrogenase, subunit 6 (complex I)                                          | 0.1216 | 0.0391 |
| 17100745 |            |                                                                                    | 0.1708 | 0.0092 |
| 17100829 |            |                                                                                    | 0.4959 | 0.015  |
| 17100837 |            |                                                                                    | 0.5267 | 0.0439 |
| 17100871 |            |                                                                                    | 0.3531 | 0.0185 |
| 17100965 |            |                                                                                    | 0.1213 | 0.0113 |
| 17101063 | SHOX       | short stature homeobox                                                             | 0.1582 | 0.0491 |
| 17101081 | CSF2RA     | colony stimulating factor 2 receptor, alpha, low-affinity (granulocyte-macrophage) | 0.2676 | 0.0066 |
| 17101248 | ARSD-AS1   | ARSD antisense RNA 1 (non-protein coding)                                          | 1.8018 | 0      |
| 17101287 | PRKX-AS1   | PRKX antisense RNA 1 (non-protein coding)                                          | 0.2167 | 0.0154 |
| 17101292 | STS        | steroid sulfatase (microsomal), isozyme S                                          | 0.6926 | 0.0052 |
| 17101319 |            |                                                                                    | 0.2316 | 0.0095 |
| 17101422 | CLCN4      | chloride channel, voltage-sensitive 4                                              | 0.2653 | 0.0334 |
| 17101447 | HCCS       | holocytochrome c synthase                                                          | 0.5564 | 0.0013 |
| 17101465 | MSL3       | male-specific lethal 3 homolog (Drosophila)                                        | 0.3962 | 0.003  |
| 17101515 |            |                                                                                    | 0.2982 | 0.0326 |
| 17101531 | TLR7       | toll-like receptor 7                                                               | 0.841  | 0.0003 |
| 17101537 | TLR8       | toll-like receptor 8                                                               | 0.3397 | 0.0061 |
| 17101543 | TMSB4X     | thymosin beta 4, X-linked                                                          | 0.3102 | 0.016  |
| 17101616 | RAB9A      | RAB9A, member RAS oncogene family                                                  | 0.4649 | 0.0116 |
| 17101622 | OFD1       | oral-facial-digital syndrome 1                                                     | 0.3022 | 0.0112 |
| 17101698 | BMX        | BMX non-receptor tyrosine kinase                                                   | 0.7387 | 0.0128 |
| 17101775 | GRPR       | gastrin-releasing peptide receptor                                                 | 0.8755 | 0.0436 |
| 17101789 |            |                                                                                    | 0.2922 | 0.0287 |
| 17101792 | MIR548AM   | microRNA 548am                                                                     | 0.1692 | 0.0087 |
| 17101957 | PDHA1      | pyruvate dehydrogenase (lipoamide) alpha 1                                         | 0.3868 | 0.0052 |
| 17101981 | EIF1AX-AS1 | EIF1AX antisense RNA 1 (non-protein coding)                                        | 0.2019 | 0.0257 |
| 17101990 | CNKSR2     | connector enhancer of kinase suppressor of Ras 2                                   | 0.6707 | 0.0348 |
| 17102032 | YY2        | YY2 transcription factor                                                           | 0.3864 | 0.0184 |
| 17102087 | ZNF645     | zinc finger protein 645                                                            | 0.1461 | 0.0259 |
| 17102129 | SAT1       | spermidine/spermine N1-acetyltransferase 1                                         | 0.4851 | 0.0131 |
| 17102290 | MAGEB5     | melanoma antigen family B, 5                                                       | 0.1422 | 0.0427 |
| 17102393 | TAB3       | TGF-beta activated kinase 1/MAP3K7 binding protein 3                               | 0.4151 | 0.0079 |
| 17102396 | TAB3-AS2   | TAB3 antisense RNA 2 (non-protein coding)                                          | 0.5243 | 0.0022 |
| 17102414 |            |                                                                                    | 0.1419 | 0.0447 |

|          |          |                                                             |        |        |
|----------|----------|-------------------------------------------------------------|--------|--------|
| 17102483 | CXorf30  | chromosome X open reading frame 30                          | 0.1208 | 0.0047 |
| 17102512 | PRRG1    | proline rich Gla (G-carboxyglutamic acid) 1                 | 0.5377 | 0.0017 |
| 17102559 |          |                                                             | 0.5152 | 0.0111 |
| 17102566 | SYTL5    | synaptotagmin-like 5                                        | 0.8523 | 0.0039 |
| 17102626 |          |                                                             | 0.151  | 0.0277 |
| 17102632 | MID1IP1  | MID1 interacting protein 1                                  | 0.9623 | 0      |
| 17102668 | ATP6AP2  | ATPase, H+ transporting, lysosomal accessory protein 2      | 0.4748 | 0.0087 |
| 17102748 |          |                                                             | 0.2281 | 0.0128 |
| 17102792 | GPR34    | G protein-coupled receptor 34                               | 0.6696 | 0.0111 |
| 17102955 | RP2      | retinitis pigmentosa 2 (X-linked recessive)                 | 0.4113 | 0.011  |
| 17103160 | ARAF     | v-raf murine sarcoma 3611 viral oncogene homolog            | 0.2338 | 0.0354 |
| 17103185 | TIMP1    | TIMP metalloproteinase inhibitor 1                          | 0.4486 | 0.0191 |
| 17103243 | SSX6     | synovial sarcoma, X breakpoint 6 (pseudogene)               | 0.2202 | 0.0104 |
| 17103282 | FTSJ1    | FtsJ RNA methyltransferase homolog 1 (E. coli)              | 0.2471 | 0.0341 |
| 17103396 | WAS      | Wiskott-Aldrich syndrome (eczema-thrombocytopenia)          | 0.2911 | 0.0271 |
| 17103525 | CCDC120  | coiled-coil domain containing 120                           | 0.1488 | 0.0455 |
| 17103545 | MAGIX    | MAGI family member, X-linked                                | 0.1961 | 0.0491 |
| 17103560 | PLP2     | proteolipid protein 2 (colonic epithelium-enriched)         | 0.4144 | 0.0167 |
| 17103572 | CCDC22   | coiled-coil domain containing 22                            | 0.2686 | 0.0313 |
| 17103715 | USP27X   | ubiquitin specific peptidase 27, X-linked                   | 0.4691 | 0.0136 |
| 17103717 | CLCN5    | chloride channel, voltage-sensitive 5                       | 0.8129 | 0.0043 |
| 17103740 | MIR532   | microRNA 532                                                | 0.1861 | 0.0177 |
| 17103835 | SNORA11E | small nucleolar RNA, H/ACA box 11E                          | 0.3555 | 0.0188 |
| 17103869 | XAGE2    | X antigen family, member 2                                  | 0.1629 | 0.0262 |
| 17103974 | RIBC1    | RIB43A domain with coiled-coils 1                           | 0.2389 | 0.0248 |
| 17103993 | TSR2     | TSR2, 20S rRNA accumulation, homolog (S. cerevisiae)        | 0.8403 | 0.0014 |
| 17104001 | GNL3L    | guanine nucleotide binding protein-like 3 (nucleolar)-like  | 0.244  | 0.0162 |
| 17104021 | MAGED2   | melanoma antigen family D, 2                                | 1.0054 | 0.0003 |
| 17104049 | SNORA11  | small nucleolar RNA, H/ACA box 11                           | 1.1175 | 0.0026 |
| 17104082 | APEX2    | APEX nuclease (apurinic/apurimidinic endonuclease) 2        | 0.6557 | 0.0001 |
| 17104122 | MAGEH1   | melanoma antigen family H, 1                                | 0.5755 | 0.0099 |
| 17104132 | RRAGB    | Ras-related GTP binding B                                   | 0.5589 | 0.0081 |
| 17104173 |          |                                                             | 0.1331 | 0.0382 |
| 17104176 | UBQLN2   | ubiquilin 2                                                 | 0.4225 | 0.0099 |
| 17104196 |          |                                                             | 0.4142 | 0.0196 |
| 17104201 | FAAH2    | fatty acid amide hydrolase 2                                | 1.4533 | 0.0012 |
| 17104217 | ZXDB     | zinc finger, X-linked, duplicated B                         | 0.5305 | 0.0137 |
| 17104226 |          |                                                             | 0.2693 | 0.0272 |
| 17104229 |          |                                                             | 0.5891 | 0.0011 |
| 17104234 |          |                                                             | 0.4593 | 0.0129 |
| 17104236 |          |                                                             | 0.4134 | 0.046  |
| 17104240 | ZC3H12B  | zinc finger CCCH-type containing 12B                        | 0.4022 | 0.002  |
| 17104259 | MSN      | moesin                                                      | 0.6912 | 0.0035 |
| 17104332 | YIPF6    | Yip1 domain family, member 6                                | 0.5228 | 0.0022 |
| 17104382 | FAM155B  | family with sequence similarity 155, member B               | 0.5001 | 0.0095 |
| 17104387 | EDA      | ectodysplasin A                                             | 0.7761 | 0.0005 |
| 17104408 |          |                                                             | 1.1499 | 0.0015 |
| 17104416 | IGBP1    | immunoglobulin (CD79A) binding protein 1                    | 0.4327 | 0.0033 |
| 17104521 | GDPD2    | glycerophosphodiester phosphodiesterase domain containing 2 | 0.1517 | 0.0093 |
| 17104540 | DLG3     | discs, large homolog 3 (Drosophila)                         | 0.7364 | 0      |
| 17104575 |          |                                                             | 0.1467 | 0.0289 |
| 17104662 | NONO     | non-POU domain containing, octamer-binding                  | 0.2818 | 0.0036 |
| 17104665 |          |                                                             | 0.7257 | 0.0053 |
| 17104675 |          |                                                             | 0.3847 | 0.0115 |
| 17104681 |          |                                                             | 0.3902 | 0.004  |
| 17104683 |          |                                                             | 0.2589 | 0.0057 |
| 17104684 |          |                                                             | 0.2975 | 0.0094 |
| 17104685 |          |                                                             | 0.2622 | 0.0042 |
| 17104686 |          |                                                             | 0.3848 | 0.0269 |



|          |                |                                                                                             |        |        |
|----------|----------------|---------------------------------------------------------------------------------------------|--------|--------|
| 17104706 | TAF1           | TAF1 RNA polymerase II, TATA box binding protein (TBP)-associated factor, 250kDa            | 0.2181 | 0.0424 |
| 17104817 | FLJ46446       | uncharacterized LOC441501                                                                   | 0.1889 | 0.0058 |
| 17104821 |                |                                                                                             | 0.1285 | 0.0471 |
| 17104850 | PIN4           | protein (peptidylprolyl cis/trans isomerase) NIMA-interacting, 4 (parvulin)                 | 0.2254 | 0.014  |
| 17104908 | CHIC1          | cysteine-rich hydrophobic domain 1                                                          | 0.743  | 0      |
| 17104960 | UPRT           | uracil phosphoribosyltransferase (FUR1) homolog (S. cerevisiae)                             | 0.4913 | 0.0012 |
| 17104977 |                |                                                                                             | 0.4314 | 0.0327 |
| 17104995 | MAGEE1         | melanoma antigen family E, 1                                                                | 0.4974 | 0.0004 |
| 17105005 |                |                                                                                             | 0.3598 | 0.0231 |
| 17105010 | COX7B          | cytochrome c oxidase subunit VIIb                                                           | 0.6865 | 0.0002 |
| 17105018 | ATP7A          | ATPase, Cu <sup>++</sup> transporting, alpha polypeptide                                    | 0.4725 | 0.0004 |
| 17105082 | GPR174         | G protein-coupled receptor 174                                                              | 0.3537 | 0.0006 |
| 17105112 |                |                                                                                             | 0.1403 | 0.0085 |
| 17105114 | SH3BGRL        | SH3 domain binding glutamic acid-rich protein like                                          | 0.3694 | 0.002  |
| 17105138 | UBE2DNL        | ubiquitin-conjugating enzyme E2D N-terminal like (pseudogene)                               | 0.2581 | 0.0001 |
| 17105143 | APOOL          | apolipoprotein O-like                                                                       | 0.643  | 0.0002 |
| 17105183 | DACH2          | dachshund homolog 2 (Drosophila)                                                            | 0.2495 | 0.039  |
| 17105284 | DIAPH2         | diaphanous homolog 2 (Drosophila)                                                           | 0.5875 | 0.0306 |
| 17105319 |                |                                                                                             | 0.1222 | 0.0157 |
| 17105347 | CSTF2          | cleavage stimulation factor, 3' pre-RNA, subunit 2, 64kDa                                   | 0.3702 | 0.0005 |
| 17105393 | TMEM35         | transmembrane protein 35                                                                    | 0.5988 | 0.0035 |
| 17105463 | RPL36A-HNRNPH2 | RPL36A-HNRNPH2 readthrough                                                                  | 0.2071 | 0.0479 |
| 17105488 | ARMCX4         | armadillo repeat containing, X-linked 4                                                     | 0.581  | 0.017  |
| 17105614 | ARMCX5-GPRASP2 | ARMCX5-GPRASP2 readthrough                                                                  | 0.2604 | 0.0256 |
| 17105655 | BHLHB9         | basic helix-loop-helix domain containing, class B, 9                                        | 0.3638 | 0.0405 |
| 17105683 | RAB40AL        | RAB40A, member RAS oncogene family-like                                                     | 0.1019 | 0.022  |
| 17105733 | TCEAL4         | transcription elongation factor A (SII)-like 4                                              | 0.2744 | 0.0012 |
| 17105757 | TCEAL1         | transcription elongation factor A (SII)-like 1                                              | 0.4958 | 0.0186 |
| 17105778 | PLP1           | proteolipid protein 1                                                                       | 0.1847 | 0.0187 |
| 17105837 | FAM199X        | family with sequence similarity 199, X-linked                                               | 0.4136 | 0.0089 |
| 17106005 | FRMPD3         | FERM and PDZ domain containing 3                                                            | 0.1769 | 0.0497 |
| 17106031 | PRPS1          | phosphoribosyl pyrophosphate synthetase 1                                                   | 0.592  | 0.0022 |
| 17106051 | MID2           | midline 2                                                                                   | 0.4433 | 0.0499 |
| 17106080 | ATG4A          | autophagy related 4A, cysteine peptidase                                                    | 0.4315 | 0.0478 |
| 17106166 |                |                                                                                             | 0.1813 | 0.0216 |
| 17106179 |                |                                                                                             | 0.4781 | 0.0031 |
| 17106202 | RGAG1          | retrotransposon gag domain containing 1                                                     | 0.5404 | 0.0054 |
| 17106305 |                |                                                                                             | 0.215  | 0.0083 |
| 17106341 | MIR448         | microRNA 448                                                                                | 0.1378 | 0.0489 |
| 17106357 | PLS3           | plastin 3                                                                                   | 0.8122 | 0.0033 |
| 17106398 | SLC6A14        | solute carrier family 6 (amino acid transporter), member 14                                 | 0.1099 | 0.0162 |
| 17106415 | WDR44          | WD repeat domain 44                                                                         | 0.4654 | 0.0029 |
| 17106438 | DOCK11         | dedicator of cytokinesis 11                                                                 | 0.8228 | 0.0027 |
| 17106572 |                |                                                                                             | 0.4768 | 0.0493 |
| 17106574 | SLC25A5        | solute carrier family 25 (mitochondrial carrier; adenine nucleotide translocator), member 5 | 0.3272 | 0.0445 |
| 17106584 |                |                                                                                             | 0.2738 | 0.0306 |
| 17106587 | UBE2A          | ubiquitin-conjugating enzyme E2A                                                            | 0.3807 | 0.0019 |
| 17106604 | NDUFA1         | NADH dehydrogenase (ubiquinone) 1 alpha subcomplex, 1, 7.5kDa                               | 0.4194 | 0.0003 |
| 17106640 | ZBTB33         | zinc finger and BTB domain containing 33                                                    | 0.377  | 0.0157 |
| 17106658 | MCTS1          | malignant T cell amplified sequence 1                                                       | 0.3526 | 0.0034 |
| 17106688 | GRIA3          | glutamate receptor, ionotropic, AMPA 3                                                      | 1.4874 | 0.0015 |
| 17106795 | SH2D1A         | SH2 domain containing 1A                                                                    | 0.1495 | 0.0184 |

|          |             |                                                                                   |        |        |
|----------|-------------|-----------------------------------------------------------------------------------|--------|--------|
| 17106822 | OCRL        | oculocerebrorenal syndrome of Lowe                                                | 0.3126 | 0.0444 |
| 17106895 | UTP14A      | UTP14, U3 small nucleolar ribonucleoprotein, homolog A (yeast)                    | 0.3878 | 0.0288 |
| 17106913 | BCORL1      | BCL6 corepressor-like 1                                                           | 0.2031 | 0.042  |
| 17106933 | RAB33A      | RAB33A, member RAS oncogene family                                                | 0.3339 | 0.023  |
| 17106938 | SLC25A14    | solute carrier family 25 (mitochondrial carrier, brain), member 14                | 0.5427 | 0.0008 |
| 17106959 | RBMX2       | RNA binding motif protein, X-linked 2                                             | 0.4656 | 0.0006 |
| 17107028 | PHF6        | PHD finger protein 6                                                              | 0.4679 | 0.0004 |
| 17107093 | LOC340581   | uncharacterized LOC340581                                                         | 0.3032 | 0.0154 |
| 17107108 |             |                                                                                   | 0.3638 | 0.0466 |
| 17107211 | SLC9A6      | solute carrier family 9, subfamily A (NHE6, cation proton antiporter 6), member 6 | 0.5376 | 0.0039 |
| 17107293 | HTATSF1     | HIV-1 Tat specific factor 1                                                       | 0.4774 | 0.0024 |
| 17107339 |             |                                                                                   | 0.1504 | 0.0339 |
| 17107385 |             |                                                                                   | 0.2276 | 0.0254 |
| 17107416 | SPANXA2-OT1 | SPANXA2 overlapping transcript 1 (non-protein coding)                             | 0.2283 | 0.0101 |
| 17107520 | FMR1        | fragile X mental retardation 1                                                    | 0.4467 | 0.0063 |
| 17107697 | MTM1        | myotubularin 1                                                                    | 0.6558 | 0.0013 |
| 17107717 | MTMR1       | myotubularin related protein 1                                                    | 0.3362 | 0.0108 |
| 17107904 |             |                                                                                   | 0.179  | 0.0023 |
| 17108021 | ATP2B3      | ATPase, Ca <sup>++</sup> transporting, plasma membrane 3                          | 1.4663 | 0.0036 |
| 17108254 | OPN1MW2     | opsin 1 (cone pigments), medium-wave-sensitive 2                                  | 0.136  | 0.0297 |
| 17108290 | EMD         | emerin                                                                            | 0.3637 | 0.0217 |
| 17108376 | GDI1        | GDP dissociation inhibitor 1                                                      | 0.2352 | 0.0196 |
| 17108546 | BRCC3       | BRCA1/BRCA2-containing complex, subunit 3                                         | 0.4292 | 0.0187 |
| 17108576 | TMLHE       | trimethyllysine hydroxylase, epsilon                                              | 0.6551 | 0.003  |
| 17108605 | VAMP7       | vesicle-associated membrane protein 7                                             | 0.9052 | 0.0001 |
| 17108658 | GTPBP6      | GTP binding protein 6 (putative)                                                  | 0.2856 | 0.041  |
| 17108767 |             |                                                                                   | 0.2156 | 0.0385 |
| 17108779 | ARSD        | arylsulfatase D                                                                   | 1.3006 | 0      |
| 17108931 | HDHD1       | haloacid dehalogenase-like hydrolase domain containing 1                          | 0.5015 | 0.0017 |
| 17108943 | PNPLA4      | patatin-like phospholipase domain containing 4                                    | 0.6453 | 0.0038 |
| 17109020 | GPR143      | G protein-coupled receptor 143                                                    | 0.4786 | 0.0063 |
| 17109035 |             |                                                                                   | 0.1928 | 0.0204 |
| 17109042 | MID1        | midline 1 (Opitz/BBB syndrome)                                                    | 0.411  | 0.0427 |
| 17109142 |             |                                                                                   | 0.2201 | 0.0492 |
| 17109150 |             |                                                                                   | 0.2207 | 0.0061 |
| 17109153 | TRAPPC2     | trafficking protein particle complex 2                                            | 0.2521 | 0.0297 |
| 17109197 | GEMIN8      | gem (nuclear organelle) associated protein 8                                      | 0.4716 | 0.0092 |
| 17109260 | PIGA        | phosphatidylinositol glycan anchor biosynthesis, class A                          | 0.2619 | 0.0239 |
| 17109326 | TMEM27      | transmembrane protein 27                                                          | 0.5109 | 0.0446 |
| 17109342 | AP1S2       | adaptor-related protein complex 1, sigma 2 subunit                                | 0.5737 | 0.0001 |
| 17109358 |             |                                                                                   | 0.8084 | 0.0239 |
| 17109432 | RAI2        | retinoic acid induced 2                                                           | 0.5998 | 0.0052 |
| 17109644 | CXorf23     | chromosome X open reading frame 23                                                | 0.295  | 0.0318 |
| 17109704 | MIR23C      | microRNA 23c                                                                      | 0.1686 | 0.014  |
| 17109748 |             |                                                                                   | 0.1641 | 0.0227 |
| 17109832 | PCYT1B      | phosphate cytidylyltransferase 1, choline, beta                                   | 0.9806 | 0.0114 |
| 17109893 | CXorf21     | chromosome X open reading frame 21                                                | 0.3417 | 0.0142 |
| 17109901 | TAB3        | TGF-beta activated kinase 1/MAP3K7 binding protein 3                              | 0.3955 | 0.0109 |
| 17109923 | FTHL17      | ferritin, heavy polypeptide-like 17                                               | 0.1915 | 0.0386 |
| 17110026 | MIR3915     | microRNA 3915                                                                     | 0.1744 | 0.0054 |
| 17110046 |             |                                                                                   | 0.1519 | 0.0437 |
| 17110050 |             |                                                                                   | 0.1444 | 0.0256 |
| 17110058 | DYNLT3      | dynein, light chain, Tctex-type 3                                                 | 0.7273 | 0.006  |
| 17110122 | MID1IP1-AS1 | MID1IP1 antisense RNA 1 (non-protein coding)                                      | 0.6196 | 0.0102 |
| 17110193 | MED14       | mediator complex subunit 14                                                       | 0.2826 | 0.0127 |
| 17110289 | MAOB        | monoamine oxidase B                                                               | 1.0737 | 0.0061 |
| 17110322 | EFHC2       | EF-hand domain (C-terminal) containing 2                                          | 0.3714 | 0.0045 |

|          |           |                                                                                   |        |        |
|----------|-----------|-----------------------------------------------------------------------------------|--------|--------|
| 17110367 | MIR222    | microRNA 222                                                                      | 0.2456 | 0.0081 |
| 17110401 | SLC9A7    | solute carrier family 9, subfamily A (NHE7, cation proton antiporter 7), member 7 | 0.9024 | 0.0047 |
| 17110404 | SLC9A7    | solute carrier family 9, subfamily A (NHE7, cation proton antiporter 7), member 7 | 0.6716 | 0.0013 |
| 17110437 | ZNF41     | zinc finger protein 41                                                            | 0.251  | 0.0269 |
| 17110447 | SYN1      | synapsin I                                                                        | 0.9261 | 0.001  |
| 17110495 | UXT       | ubiquitously-expressed, prefoldin-like chaperone                                  | 0.4784 | 0.0045 |
| 17110509 | LOC441493 | uncharacterized LOC441493                                                         | 0.1779 | 0.0363 |
| 17110511 | ZNF182    | zinc finger protein 182                                                           | 0.2207 | 0.0297 |
| 17110622 |           |                                                                                   | 0.5838 | 0.023  |
| 17110629 |           |                                                                                   | 0.193  | 0.0198 |
| 17110639 | TIMM17B   | translocase of inner mitochondrial membrane 17 homolog B (yeast)                  | 0.299  | 0.0213 |
| 17110654 | SLC35A2   | solute carrier family 35 (UDP-galactose transporter), member A2                   | 0.3217 | 0.0154 |
| 17110681 | OTUD5     | OTU domain containing 5                                                           | 0.3978 | 0.0104 |
| 17110745 | TFE3      | transcription factor binding to IGHM enhancer 3                                   | 0.4582 | 0.0038 |
| 17110771 | WDR45     | WD repeat domain 45                                                               | 0.2859 | 0.0318 |
| 17110800 | GPKOW     | G patch domain and KOW motifs                                                     | 0.2723 | 0.0306 |
| 17110817 | PRICKLE3  | prickle homolog 3 (Drosophila)                                                    | 0.2285 | 0.0036 |
| 17110902 | FOXP3     | forkhead box P3                                                                   | 0.1169 | 0.0408 |
| 17110934 | AKAP4     | A kinase (PRKA) anchor protein 4                                                  | 0.167  | 0.0054 |
| 17111055 | SNORA11E  | small nucleolar RNA, H/ACA box 11E                                                | 0.3555 | 0.0188 |
| 17111067 | XAGE2     | X antigen family, member 2                                                        | 0.1629 | 0.0262 |
| 17111193 | IQSEC2    | IQ motif and Sec7 domain 2                                                        | 0.3301 | 0.0136 |
| 17111366 | PHF8      | PHD finger protein 8                                                              | 0.3653 | 0.0028 |
| 17111435 | WNK3      | WNK lysine deficient protein kinase 3                                             | 1.4055 | 0.0023 |
| 17111501 | PFKFB1    | 6-phosphofructo-2-kinase/fructose-2,6-biphosphatase 1                             | 0.2147 | 0.0451 |
| 17111534 | FAM104B   | family with sequence similarity 104, member B                                     | 0.3662 | 0.0087 |
| 17111560 |           |                                                                                   | 0.2821 | 0.0105 |
| 17111590 | ZXDA      | zinc finger, X-linked, duplicated A                                               | 0.6291 | 0.0006 |
| 17111599 | LOC92249  | uncharacterized LOC92249                                                          | 0.3138 | 0.047  |
| 17111674 | ZC4H2     | zinc finger, C4H2 domain containing                                               | 0.7496 | 0.0002 |
| 17111688 | LAS1L     | LAS1-like (S. cerevisiae)                                                         | 0.4645 | 0.009  |
| 17111725 | EDA2R     | ectodysplasin A2 receptor                                                         | 0.8214 | 0.0008 |
| 17111738 | OPHN1     | oligophrenin 1                                                                    | 0.8155 | 0      |
| 17111767 |           |                                                                                   | 0.1732 | 0.0436 |
| 17111808 | PDZD11    | PDZ domain containing 11                                                          | 0.5339 | 0.0017 |
| 17111820 | DLG3-AS1  | DLG3 antisense RNA 1 (non-protein coding)                                         | 0.348  | 0.0009 |
| 17111895 | IL2RG     | interleukin 2 receptor, gamma                                                     | 0.4027 | 0.0257 |
| 17111978 |           |                                                                                   | 0.1285 | 0.0471 |
| 17111982 | FLJ46446  | uncharacterized LOC441501                                                         | 0.2696 | 0.0019 |
| 17111994 | RGAG4     | retrotransposon gag domain containing 4                                           | 0.7427 | 0.0033 |
| 17112005 | RPS4X     | ribosomal protein S4, X-linked                                                    | 0.2728 | 0.008  |
| 17112032 | HDAC8     | histone deacetylase 8                                                             | 0.398  | 0.0156 |
| 17112058 |           |                                                                                   | 0.2687 | 0.0093 |
| 17112060 | PHKA1     | phosphorylase kinase, alpha 1 (muscle)                                            | 0.8152 | 0.0014 |
| 17112137 | NAP1L2    | nucleosome assembly protein 1-like 2                                              | 1.1053 | 0.0128 |
| 17112167 |           |                                                                                   | 0.4804 | 0.0148 |
| 17112198 | RLIM      | ring finger protein, LIM domain interacting                                       | 0.342  | 0.0384 |
| 17112213 | ABCB7     | ATP-binding cassette, sub-family B (MDR/TAP), member 7                            | 0.4573 | 0.0011 |
| 17112235 | ZDHC15    | zinc finger, DHHC-type containing 15                                              | 0.5949 | 0.0054 |
| 17112255 | MAGEE2    | melanoma antigen family E, 2                                                      | 0.2559 | 0.0042 |
| 17112269 | ATRX      | alpha thalassemia/mental retardation syndrome X-linked                            | 0.6725 | 0.0094 |
| 17112316 | MAGT1     | magnesium transporter 1                                                           | 0.2956 | 0.044  |
| 17112339 | TAF9B     | TAF9B RNA polymerase II, TATA box binding protein (TBP)-associated factor, 31kDa  | 0.4451 | 0.0191 |
| 17112439 | RPS6KA6   | ribosomal protein S6 kinase, 90kDa, polypeptide 6                                 | 0.4996 | 0.0328 |
| 17112488 | SATL1     | spermidine/spermine N1-acetyl transferase-like 1                                  | 0.257  | 0.0287 |

|          |              |                                                                            |        |        |
|----------|--------------|----------------------------------------------------------------------------|--------|--------|
| 17112519 | CHM          | choroideremia (Rab escort protein 1)                                       | 0.3148 | 0.0441 |
| 17112550 | PABPC5-AS1   | PABPC5 antisense RNA 1 (non-protein coding)                                | 0.2381 | 0.0419 |
| 17112656 | NOX1         | NADPH oxidase 1                                                            | 0.179  | 0.0435 |
| 17112683 |              |                                                                            | 0.6249 | 0.0011 |
| 17112686 | TRMT2B       | tRNA methyltransferase 2 homolog B ( <i>S. cerevisiae</i> )                | 0.4837 | 0.0087 |
| 17112727 |              |                                                                            | 0.119  | 0.0278 |
| 17112735 | BTK          | Bruton agammaglobulinemia tyrosine kinase                                  | 0.2886 | 0.0082 |
| 17112923 |              |                                                                            | 0.1562 | 0.0114 |
| 17112956 | TCEAL8       | transcription elongation factor A (SII)-like 8                             | 0.3855 | 0.0056 |
| 17112969 | BEX2         | brain expressed X-linked 2                                                 | 0.5118 | 0.0347 |
| 17113038 | LOC100128594 | uncharacterized LOC100128594                                               | 0.1319 | 0.0374 |
| 17113047 | SLC25A53     | solute carrier family 25, member 53                                        | 0.2659 | 0.0004 |
| 17113053 | LOC286437    | uncharacterized LOC286437                                                  | 0.3975 | 0.0312 |
| 17113110 | RBM41        | RNA binding motif protein 41                                               | 0.6034 | 0.0027 |
| 17113129 | NUP62CL      | nucleoporin 62kDa C-terminal like                                          | 1.1006 | 0.0027 |
| 17113184 | PSMD10       | proteasome (prosome, macropain) 26S subunit, non-ATPase, 10                | 0.4438 | 0.0027 |
| 17113286 | KCNE1L       | KCNE1-like                                                                 | 0.1235 | 0.0239 |
| 17113293 | ACSL4        | acyl-CoA synthetase long-chain family member 4                             | 0.785  | 0.0101 |
| 17113362 | CAPN6        | calpain 6                                                                  | 0.3077 | 0.0094 |
| 17113492 |              |                                                                            | 0.4497 | 0.0072 |
| 17113496 |              |                                                                            | 0.3516 | 0.0337 |
| 17113545 |              |                                                                            | 0.2495 | 0.0094 |
| 17113577 | SLC25A5-AS1  | SLC25A5 antisense RNA 1 (non-protein coding)                               | 0.1939 | 0.025  |
| 17113655 | LOC100506992 | uncharacterized LOC100506992                                               | 0.7247 | 0.0001 |
| 17113658 | NKAP         | NFKB activating protein                                                    | 0.4897 | 0.0031 |
| 17113690 |              |                                                                            | 0.2847 | 0.0131 |
| 17113696 | NKAPP1       | NFKB activating protein pseudogene 1                                       | 0.3556 | 0.0055 |
| 17113725 | LAMP2        | lysosomal-associated membrane protein 2                                    | 0.6178 | 0.0015 |
| 17113744 | CUL4B        | cullin 4B                                                                  | 0.3729 | 0.0014 |
| 17113774 | C1GALT1C1    | C1GALT1-specific chaperone 1                                               | 0.4588 | 0.0024 |
| 17113817 | CT47A7       | cancer/testis antigen family 47, member A7                                 | 0.2254 | 0.0424 |
| 17113858 |              |                                                                            | 0.2199 | 0.0481 |
| 17113928 | ODZ1         | odz, odd Oz/ten-m homolog 1 ( <i>Drosophila</i> )                          | 0.6105 | 0.0054 |
| 17114014 |              |                                                                            | 1.5161 | 0.0015 |
| 17114017 | ZDHC9        | zinc finger, DHHC-type containing 9                                        | 0.4412 | 0.039  |
| 17114051 | AIFM1        | apoptosis-inducing factor, mitochondrion-associated, 1                     | 0.539  | 0.0029 |
| 17114114 | ENOX2        | ecto-NOX disulfide-thiol exchanger 2                                       | 0.6129 | 0.0097 |
| 17114134 |              |                                                                            | 0.1616 | 0.036  |
| 17114318 | MIR450B      | microRNA 450b                                                              | 0.1499 | 0.0086 |
| 17114368 | MOSPD1       | motile sperm domain containing 1                                           | 0.7239 | 0.0109 |
| 17114382 | FAM127C      | family with sequence similarity 127, member C                              | 0.508  | 0.0042 |
| 17114394 | LINC00087    | long intergenic non-protein coding RNA 87                                  | 1.2476 | 0.0404 |
| 17114489 | MAP7D3       | MAP7 domain containing 3                                                   | 0.4219 | 0.0186 |
| 17114546 |              |                                                                            | 0.2252 | 0.0382 |
| 17114572 |              |                                                                            | 0.2697 | 0.0022 |
| 17114643 | ATP11C       | ATPase, class VI, type 11C                                                 | 0.4446 | 0.008  |
| 17114707 | LDLOC1       | leucine zipper, down-regulated in cancer 1                                 | 0.6224 | 0.0188 |
| 17114762 |              |                                                                            | 0.2104 | 0.0242 |
| 17114766 | MIR888       | microRNA 888                                                               | 0.2094 | 0.0171 |
| 17114783 | MIR513B      | microRNA 513b                                                              | 0.2517 | 0.0027 |
| 17114785 | MIR513A1     | microRNA 513a-1                                                            | 0.4627 | 0.0355 |
| 17114789 | MIR506       | microRNA 506                                                               | 1.7115 | 0.0012 |
| 17114803 | MIR510       | microRNA 510                                                               | 0.6312 | 0.0038 |
| 17114856 | LOC100131434 | uncharacterized LOC100131434                                               | 0.3929 | 0.0229 |
| 17114934 | CD99L2       | CD99 molecule-like 2                                                       | 0.4584 | 0.0062 |
| 17115077 | CETN2        | centrin, EF-hand protein, 2                                                | 0.366  | 0.0171 |
| 17115453 | MECP2        | methyl CpG binding protein 2 (Rett syndrome)                               | 0.2704 | 0.0127 |
| 17115571 | DNASE1L1     | deoxyribonuclease I-like 1                                                 | 0.3105 | 0.0193 |
| 17115608 | SLC10A3      | solute carrier family 10 (sodium/bile acid cotransporter family), member 3 | 0.4706 | 0.0008 |

|          |              |                                                                                    |        |        |
|----------|--------------|------------------------------------------------------------------------------------|--------|--------|
| 17115617 | FAM3A        | family with sequence similarity 3, member A                                        | 0.3148 | 0.0123 |
| 17115692 | MPP1         | membrane protein, palmitoylated 1, 55kDa                                           | 0.4414 | 0.0122 |
| 17115807 | TMLHE        | trimethyllysine hydroxylase, epsilon                                               | 0.5441 | 0.006  |
| 17115850 | CSF2RA       | colony stimulating factor 2 receptor, alpha, low-affinity (granulocyte-macrophage) | 0.4645 | 0.0031 |
| 17116346 |              |                                                                                    | 0.1045 | 0.0431 |
| 17116684 | VAMP7        | vesicle-associated membrane protein 7                                              | 0.9038 | 0.0001 |
| 17117042 |              |                                                                                    | 0.1045 | 0.0431 |
| 17117443 |              |                                                                                    | 0.5404 | 0.0151 |
| 17117476 | LOC100128356 | protein transactivated by hepatitis B virus E antigen                              | 0.2534 | 0.0043 |
| 17117583 | LOC283335    | uncharacterized LOC283335                                                          | 0.1662 | 0.0458 |
| 17117590 |              |                                                                                    | 0.2172 | 0.043  |
| 17117604 |              |                                                                                    | 0.3499 | 0.0419 |
| 17117734 |              |                                                                                    | 0.2491 | 0.0037 |
| 17117786 |              |                                                                                    | 0.4569 | 0.0036 |
| 17117831 |              |                                                                                    | 0.2523 | 0.0247 |
| 17118013 |              |                                                                                    | 0.1673 | 0.0393 |
| 17118140 | HP07349      | uncharacterized LOC100652853                                                       | 0.3956 | 0.0497 |
| 17118144 | LOC100652886 | uncharacterized LOC100652886                                                       | 1.3436 | 0.0003 |
| 17118228 | HLA-E        | major histocompatibility complex, class I, E                                       | 0.9428 | 0.0001 |
| 17118232 | HLA-E        | major histocompatibility complex, class I, E                                       | 0.9428 | 0.0001 |
| 17118242 | HLA-E        | major histocompatibility complex, class I, E                                       | 0.9428 | 0.0001 |
| 17118246 | HLA-E        | major histocompatibility complex, class I, E                                       | 0.9428 | 0.0001 |
| 17118250 | LOC100505829 | uncharacterized LOC100505829                                                       | 0.1058 | 0.0269 |
| 17118279 | LOC100130169 | uncharacterized LOC100130169                                                       | 0.2804 | 0.0035 |
| 17118358 |              |                                                                                    | 0.3429 | 0.048  |
| 17118442 |              |                                                                                    | 0.1673 | 0.0393 |
| 17118512 |              |                                                                                    | 0.2376 | 0.0084 |
| 17118518 |              |                                                                                    | 0.201  | 0.0111 |
| 17118550 |              |                                                                                    | 0.1258 | 0.0343 |
| 17118566 |              |                                                                                    | 0.1459 | 0.0279 |
| 17118568 |              |                                                                                    | 0.1742 | 0.0446 |
| 17118618 |              |                                                                                    | 0.1116 | 0.0321 |
| 17118626 |              |                                                                                    | 0.1609 | 0.0272 |
| 17118634 |              |                                                                                    | 0.2376 | 0.0084 |
| 17118636 |              |                                                                                    | 0.113  | 0.0282 |
| 17118638 |              |                                                                                    | 0.1245 | 0.0499 |
| 17118672 |              |                                                                                    | 0.2068 | 0.0401 |
| 17118748 |              |                                                                                    | 0.3586 | 0.009  |
| 17118844 |              |                                                                                    | 0.2001 | 0.0392 |
| 17118868 |              |                                                                                    | 1.0219 | 0.0002 |
| 17118878 |              |                                                                                    | 0.2098 | 0.0291 |
| 17118880 |              |                                                                                    | 0.4328 | 0.0228 |
| 17119114 |              |                                                                                    | 0.453  | 0.0214 |
| 17119220 |              |                                                                                    | 0.3212 | 0.0059 |
| 17119240 |              |                                                                                    | 0.1764 | 0.0398 |
| 17119256 |              |                                                                                    | 0.2997 | 0.0185 |
| 17119308 |              |                                                                                    | 0.1484 | 0.0097 |
| 17119386 |              |                                                                                    | 0.5745 | 0.0122 |
| 17119466 |              |                                                                                    | 0.1415 | 0.0234 |
| 17119508 |              |                                                                                    | 0.183  | 0.026  |
| 17119516 |              |                                                                                    | 0.1201 | 0.0239 |
| 17119572 |              |                                                                                    | 0.3755 | 0.023  |
| 17119590 |              |                                                                                    | 0.3842 | 0.0402 |
| 17119602 |              |                                                                                    | 0.1201 | 0.0239 |
| 17119754 |              |                                                                                    | 0.2306 | 0.0296 |
| 17119790 |              |                                                                                    | 0.1879 | 0.0181 |
| 17119820 |              |                                                                                    | 0.2199 | 0.0481 |
| 17119822 |              |                                                                                    | 0.1649 | 0.0234 |
| 17119902 |              |                                                                                    | 0.2635 | 0.0128 |
| 17119904 |              |                                                                                    | 0.2087 | 0.034  |

|          |  |  |        |        |
|----------|--|--|--------|--------|
| 17119918 |  |  | 0.2743 | 0.0046 |
| 17119942 |  |  | 0.1242 | 0.0105 |
| 17119962 |  |  | 0.4354 | 0.0106 |
| 17120008 |  |  | 0.2193 | 0.0061 |
| 17120034 |  |  | 0.1655 | 0.0263 |
| 17120056 |  |  | 0.5029 | 0.003  |
| 17120058 |  |  | 0.6127 | 0.0029 |
| 17120080 |  |  | 0.2889 | 0.0097 |
| 17120092 |  |  | 0.5003 | 0.0444 |
| 17120110 |  |  | 0.1555 | 0.0277 |
| 17120178 |  |  | 0.463  | 0      |
| 17120300 |  |  | 0.1728 | 0.0273 |
| 17120302 |  |  | 0.2425 | 0.0439 |
| 17120304 |  |  | 0.4669 | 0.0475 |
| 17120320 |  |  | 0.3379 | 0      |
| 17120350 |  |  | 0.46   | 0.0457 |
| 17120352 |  |  | 0.3481 | 0.0404 |
| 17120392 |  |  | 0.1629 | 0.0057 |
| 17120446 |  |  | 0.1901 | 0.0114 |
| 17120450 |  |  | 0.1259 | 0.0195 |
| 17120478 |  |  | 0.276  | 0.0003 |
| 17120524 |  |  | 0.1965 | 0.0237 |
| 17120542 |  |  | 0.1525 | 0.0439 |
| 17120546 |  |  | 0.1773 | 0.0109 |
| 17120592 |  |  | 0.2155 | 0.0144 |
| 17120596 |  |  | 0.1147 | 0.0341 |
| 17120610 |  |  | 0.5772 | 0.0405 |
| 17120618 |  |  | 0.4914 | 0.0193 |
| 17120668 |  |  | 0.1635 | 0.0287 |
| 17120694 |  |  | 0.2191 | 0.0027 |
| 17120736 |  |  | 0.1142 | 0.0169 |
| 17120774 |  |  | 0.1274 | 0.0138 |
| 17120840 |  |  | 0.2734 | 0.0299 |
| 17120890 |  |  | 0.1284 | 0.006  |
| 17120892 |  |  | 0.1644 | 0.0153 |
| 17120900 |  |  | 0.1508 | 0.009  |
| 17120908 |  |  | 0.132  | 0.039  |
| 17120916 |  |  | 0.1367 | 0.0401 |
| 17120924 |  |  | 0.1772 | 0.0104 |
| 17121010 |  |  | 0.1705 | 0.002  |
| 17121020 |  |  | 0.1688 | 0.0257 |
| 17121054 |  |  | 0.157  | 0.0395 |
| 17121056 |  |  | 0.1064 | 0.0377 |
| 17121060 |  |  | 0.1291 | 0.0026 |
| 17121088 |  |  | 0.6068 | 0.0242 |
| 17121180 |  |  | 0.3172 | 0.0064 |
| 17121184 |  |  | 0.3103 | 0.0299 |
| 17121186 |  |  | 0.2695 | 0.0181 |
| 17121188 |  |  | 0.2763 | 0.0143 |
| 17121194 |  |  | 0.2346 | 0.0091 |
| 17121198 |  |  | 0.385  | 0.0029 |
| 17121200 |  |  | 0.3274 | 0.0144 |
| 17121248 |  |  | 0.3582 | 0.0066 |
| 17121250 |  |  | 0.207  | 0.0336 |
| 17121252 |  |  | 0.2501 | 0.0249 |
| 17121332 |  |  | 0.2312 | 0.0042 |
| 17121394 |  |  | 0.5267 | 0.0002 |
| 17121426 |  |  | 0.143  | 0.0439 |
| 17121450 |  |  | 0.3163 | 0.0064 |
| 17121452 |  |  | 0.2292 | 0.0009 |
| 17121532 |  |  | 0.4093 | 0.0002 |

|          |  |  |        |        |
|----------|--|--|--------|--------|
| 17121534 |  |  | 0.4963 | 0      |
| 17121552 |  |  | 0.1916 | 0.0153 |
| 17121604 |  |  | 0.1928 | 0.0219 |
| 17121614 |  |  | 0.1483 | 0.0354 |
| 17121616 |  |  | 0.2423 | 0.0021 |
| 17121644 |  |  | 0.1516 | 0.0307 |
| 17121744 |  |  | 0.1421 | 0.0094 |
| 17121822 |  |  | 0.2387 | 0.0098 |
| 17121886 |  |  | 0.508  | 0.0044 |
| 17121888 |  |  | 0.6438 | 0.0041 |
| 17121890 |  |  | 0.3473 | 0.0087 |
| 17121922 |  |  | 0.1985 | 0.0377 |
| 17121938 |  |  | 0.1967 | 0.0423 |
| 17121996 |  |  | 0.2425 | 0.0477 |
| 17122018 |  |  | 0.2947 | 0.0039 |
| 17122022 |  |  | 0.3896 | 0.0035 |
| 17122024 |  |  | 0.4212 | 0.002  |
| 17122026 |  |  | 0.8009 | 0.0012 |
| 17122030 |  |  | 0.6108 | 0.0015 |
| 17122032 |  |  | 0.5163 | 0.0011 |
| 17122034 |  |  | 0.6621 | 0.0012 |
| 17122062 |  |  | 0.1272 | 0.0463 |
| 17122070 |  |  | 0.3821 | 0.0294 |
| 17122100 |  |  | 0.3293 | 0.0244 |
| 17122106 |  |  | 0.4987 | 0.0471 |
| 17122108 |  |  | 0.3111 | 0.0227 |
| 17122124 |  |  | 0.2438 | 0.0023 |
| 17122126 |  |  | 0.2469 | 0.0035 |
| 17122132 |  |  | 0.1994 | 0.0009 |
| 17122224 |  |  | 0.1518 | 0.0204 |
| 17122234 |  |  | 0.2837 | 0.0192 |
| 17122292 |  |  | 0.1325 | 0.034  |
| 17122298 |  |  | 0.5671 | 0.012  |
| 17122326 |  |  | 0.1582 | 0.0172 |
| 17122348 |  |  | 0.9886 | 0.011  |
| 17122350 |  |  | 0.6652 | 0.0179 |
| 17122370 |  |  | 0.2779 | 0.0337 |
| 17122408 |  |  | 0.2123 | 0.0096 |
| 17122412 |  |  | 0.1184 | 0.0037 |
| 17122440 |  |  | 0.1266 | 0.0202 |
| 17122456 |  |  | 0.1979 | 0.0259 |
| 17122534 |  |  | 0.5743 | 0.0142 |
| 17122536 |  |  | 0.1931 | 0.0226 |
| 17122540 |  |  | 0.2303 | 0.0038 |
| 17122542 |  |  | 0.1678 | 0.0083 |
| 17122566 |  |  | 0.1298 | 0.0149 |
| 17122568 |  |  | 0.1914 | 0.0032 |
| 17122602 |  |  | 0.2038 | 0.003  |
| 17122680 |  |  | 0.1651 | 0.0221 |
| 17122686 |  |  | 0.4687 | 0.0198 |
| 17122688 |  |  | 0.4368 | 0.0229 |
| 17122690 |  |  | 0.3819 | 0.0432 |
| 17122692 |  |  | 0.3731 | 0.0081 |
| 17122694 |  |  | 0.1901 | 0.0002 |
| 17122762 |  |  | 0.1271 | 0.0081 |
| 17122786 |  |  | 0.1885 | 0.0411 |
| 17122798 |  |  | 0.1333 | 0.0184 |
| 17122812 |  |  | 0.1794 | 0.018  |
| 17122814 |  |  | 0.1536 | 0.0168 |
| 17122854 |  |  | 0.1519 | 0.03   |
| 17122986 |  |  | 0.1495 | 0.034  |

|          |  |  |        |        |
|----------|--|--|--------|--------|
| 17123010 |  |  | 0.1994 | 0.0115 |
| 17123058 |  |  | 0.2952 | 0.037  |
| 17123060 |  |  | 0.2825 | 0.0057 |
| 17123066 |  |  | 0.1343 | 0.0112 |
| 17123100 |  |  | 0.169  | 0.0143 |
| 17123110 |  |  | 0.155  | 0.0175 |
| 17123196 |  |  | 0.2694 | 0.0081 |
| 17123260 |  |  | 0.3626 | 0.0106 |
| 17123262 |  |  | 0.7186 | 0.001  |
| 17123264 |  |  | 0.5531 | 0.0088 |
| 17123266 |  |  | 0.5452 | 0.0013 |
| 17123268 |  |  | 0.4474 | 0.0049 |
| 17123270 |  |  | 0.294  | 0.035  |
| 17123296 |  |  | 0.1782 | 0.0059 |
| 17123302 |  |  | 0.8398 | 0      |
| 17123306 |  |  | 0.779  | 0.0002 |
| 17123308 |  |  | 0.9434 | 0      |
| 17123310 |  |  | 1.3812 | 0.0001 |
| 17123312 |  |  | 0.4692 | 0.0227 |
| 17123340 |  |  | 0.1264 | 0.0273 |
| 17123384 |  |  | 0.1617 | 0.0062 |
| 17123400 |  |  | 0.3975 | 0.0001 |
| 17123402 |  |  | 0.1265 | 0.0037 |
| 17123446 |  |  | 0.1687 | 0.0099 |
| 17123466 |  |  | 0.144  | 0.0489 |
| 17123516 |  |  | 0.1098 | 0.0346 |
| 17123520 |  |  | 0.2782 | 0.001  |
| 17123522 |  |  | 0.6557 | 0.0007 |
| 17123524 |  |  | 0.1188 | 0.0409 |
| 17123538 |  |  | 0.1042 | 0.0101 |
| 17123550 |  |  | 0.1714 | 0.0064 |
| 17123562 |  |  | 0.142  | 0.0418 |
| 17123590 |  |  | 0.1986 | 0.0176 |
| 17123592 |  |  | 0.2461 | 0.022  |
| 17123644 |  |  | 0.2415 | 0.0123 |
| 17123664 |  |  | 0.2435 | 0.0444 |
| 17123786 |  |  | 0.169  | 0.0032 |
| 17123790 |  |  | 0.1976 | 0.0006 |
| 17123814 |  |  | 0.2122 | 0.0458 |
| 17123816 |  |  | 0.1208 | 0.0166 |
| 17123828 |  |  | 0.2461 | 0.0297 |
| 17123836 |  |  | 0.1655 | 0.0071 |
| 17123864 |  |  | 0.1315 | 0.0211 |
| 17123882 |  |  | 0.6453 | 0.0033 |
| 17123902 |  |  | 0.221  | 0.0241 |
| 17123904 |  |  | 0.2306 | 0.0141 |
| 17123906 |  |  | 0.4034 | 0.025  |
| 17123944 |  |  | 0.2164 | 0.0002 |
| 17123948 |  |  | 0.1582 | 0.0158 |
| 17123960 |  |  | 0.2512 | 0.0157 |
| 17124022 |  |  | 0.1318 | 0.0426 |
| 17124036 |  |  | 0.2474 | 0.0167 |
| 17124040 |  |  | 0.9258 | 0.0031 |
| 17124050 |  |  | 0.1591 | 0.0379 |
| 17124104 |  |  | 0.1739 | 0.0417 |
| 17124120 |  |  | 0.2601 | 0.0175 |
| 17124144 |  |  | 0.1272 | 0.0122 |
| 17124146 |  |  | 0.8638 | 0.0219 |
| 17124148 |  |  | 0.5454 | 0.0073 |
| 17124152 |  |  | 0.1271 | 0.0104 |
| 17124168 |  |  | 0.1108 | 0.0248 |



|          |  |  |        |        |
|----------|--|--|--------|--------|
| 17124172 |  |  | 0.141  | 0.0135 |
| 17124198 |  |  | 0.1511 | 0.0231 |
| 17124238 |  |  | 0.1651 | 0.0064 |
| 17124256 |  |  | 0.838  | 0.0001 |
| 17124258 |  |  | 0.3312 | 0.0167 |
| 17124302 |  |  | 0.1202 | 0.0287 |
| 17124340 |  |  | 0.2366 | 0.0419 |
| 17124386 |  |  | 0.1658 | 0.0455 |
| 17124388 |  |  | 0.228  | 0.0247 |
| 17124414 |  |  | 0.2519 | 0.0162 |
| 17124416 |  |  | 0.1951 | 0.0174 |
| 17124420 |  |  | 0.23   | 0.0157 |
| 17124606 |  |  | 0.374  | 0.0357 |
| 17124626 |  |  | 1.0452 | 0.0126 |
| 17124648 |  |  | 0.1696 | 0.0007 |
| 17124662 |  |  | 0.4246 | 0.0496 |
| 17124690 |  |  | 0.2202 | 0.011  |
| 17124736 |  |  | 0.2307 | 0.0455 |
| 17124738 |  |  | 0.277  | 0.0231 |
| 17124740 |  |  | 0.191  | 0.0434 |
| 17124782 |  |  | 0.244  | 0.002  |
| 17124816 |  |  | 0.7351 | 0.0272 |
| 17124818 |  |  | 0.4723 | 0.0025 |
| 17124832 |  |  | 0.4631 | 0.0292 |
| 17124838 |  |  | 0.3226 | 0.0305 |
| 17124842 |  |  | 0.348  | 0.003  |
| 17124854 |  |  | 0.1461 | 0.0173 |
| 17124874 |  |  | 0.3094 | 0.0106 |
| 17124926 |  |  | 0.2062 | 0.0013 |
| 17124928 |  |  | 0.1929 | 0.0029 |
| 17124956 |  |  | 0.1137 | 0.0352 |
| 17124974 |  |  | 0.1904 | 0.0028 |
| 17125006 |  |  | 0.1736 | 0.0488 |
| 17125026 |  |  | 0.1598 | 0.0299 |
| 17125042 |  |  | 0.2709 | 0.0456 |
| 17125062 |  |  | 0.3061 | 0.0056 |
| 17125140 |  |  | 0.1742 | 0.0101 |
| 17125154 |  |  | 0.3884 | 0.0292 |
| 17125160 |  |  | 0.2369 | 0.0171 |
| 17125234 |  |  | 0.142  | 0.0057 |
| 17125292 |  |  | 0.5614 | 0.0036 |
| 17125294 |  |  | 0.4992 | 0.0048 |
| 17125322 |  |  | 0.1365 | 0.0028 |
| 17125364 |  |  | 0.1445 | 0.0089 |
| 17125452 |  |  | 0.1511 | 0.006  |
| 17125464 |  |  | 0.5424 | 0.0076 |
| 17125466 |  |  | 0.6061 | 0.0083 |
| 17125474 |  |  | 0.5719 | 0.0024 |
| 17125476 |  |  | 0.5724 | 0.0032 |
| 17125502 |  |  | 0.5261 | 0.0044 |
| 17125504 |  |  | 0.6092 | 0.0085 |
| 17125512 |  |  | 0.4183 | 0.0396 |
| 17125514 |  |  | 0.3049 | 0.0399 |
| 17125526 |  |  | 0.2552 | 0.0469 |
| 17125546 |  |  | 0.3685 | 0.0178 |
| 17125550 |  |  | 0.2963 | 0.0124 |
| 17125552 |  |  | 0.1993 | 0.0021 |
| 17125558 |  |  | 0.105  | 0.0364 |
| 17125560 |  |  | 0.1975 | 0.0106 |
| 17125562 |  |  | 0.3045 | 0.0335 |
| 17125572 |  |  | 0.2762 | 0.032  |

|          |  |  |         |        |
|----------|--|--|---------|--------|
| 17125574 |  |  | 0.8468  | 0.022  |
| 17125576 |  |  | 0.6699  | 0.0032 |
| 17125578 |  |  | 0.7772  | 0.0086 |
| 17125580 |  |  | 0.8148  | 0.005  |
| 17125582 |  |  | 0.8918  | 0.0077 |
| 17125620 |  |  | 0.4324  | 0.0009 |
| 17125634 |  |  | 0.151   | 0.0097 |
| 17125652 |  |  | 0.4301  | 0.0452 |
| 17125666 |  |  | 0.3481  | 0.0264 |
| 17125672 |  |  | 0.5787  | 0.0067 |
| 17125674 |  |  | 0.255   | 0.0234 |
| 17125684 |  |  | 0.3263  | 0.0097 |
| 17125686 |  |  | 0.508   | 0.0084 |
| 17125688 |  |  | 0.5911  | 0.0119 |
| 17125690 |  |  | 0.7577  | 0.0116 |
| 17125692 |  |  | 0.9015  | 0.002  |
| 17125704 |  |  | 0.9238  | 0.0071 |
| 17125706 |  |  | 0.1802  | 0.0118 |
| 17125714 |  |  | 0.1765  | 0.0117 |
| 17125748 |  |  | 0.2803  | 0.0486 |
| 17125778 |  |  | 0.3886  | 0.0002 |
| 17125882 |  |  | 0.4568  | 0.0104 |
| 17125932 |  |  | 0.4568  | 0.0104 |
| 17126016 |  |  | 0.3903  | 0.0285 |
| 17126032 |  |  | 0.6966  | 0.0224 |
| 17126054 |  |  | 2.011   | 0      |
| 17126104 |  |  | 0.1873  | 0.0387 |
| 17126142 |  |  | 0.6966  | 0.0224 |
| 17126164 |  |  | 2.011   | 0      |
| 17126260 |  |  | 0.1433  | 0.0487 |
| 17126270 |  |  | 0.139   | 0.0128 |
| 16650013 |  |  | -0.3993 | 0.0391 |
| 16650021 |  |  | -0.3391 | 0.026  |
| 16650027 |  |  | -0.2918 | 0.0082 |
| 16650047 |  |  | -0.8221 | 0.0051 |
| 16650103 |  |  | -0.5286 | 0.0117 |
| 16650123 |  |  | -0.4572 | 0.0327 |
| 16650145 |  |  | -0.4638 | 0.0489 |
| 16650211 |  |  | -0.5809 | 0.0023 |
| 16650315 |  |  | -0.3383 | 0.0495 |
| 16650329 |  |  | -0.5667 | 0.0343 |
| 16650351 |  |  | -0.4842 | 0.0243 |
| 16650365 |  |  | -0.4655 | 0.0335 |
| 16650373 |  |  | -0.435  | 0.0478 |
| 16650393 |  |  | -0.474  | 0.0256 |
| 16650395 |  |  | -0.3726 | 0.0358 |
| 16650401 |  |  | -0.607  | 0.0223 |
| 16650411 |  |  | -0.5353 | 0.027  |
| 16650417 |  |  | -0.4503 | 0.009  |
| 16650425 |  |  | -0.3626 | 0.0289 |
| 16650465 |  |  | -0.2735 | 0.0451 |
| 16650507 |  |  | -0.236  | 0.021  |
| 16650537 |  |  | -0.4901 | 0.023  |
| 16650571 |  |  | -0.8281 | 0.008  |
| 16650583 |  |  | -0.3374 | 0.032  |
| 16650601 |  |  | -0.2787 | 0.0278 |
| 16650649 |  |  | -0.9009 | 0.0185 |
| 16650729 |  |  | -0.5945 | 0.0401 |
| 16650735 |  |  | -0.715  | 0.0445 |
| 16650819 |  |  | -0.6102 | 0.0112 |
| 16650837 |  |  | -0.4464 | 0.0349 |

|          |  |  |         |        |
|----------|--|--|---------|--------|
| 16650849 |  |  | -0.2363 | 0.0246 |
| 16650857 |  |  | -0.4166 | 0.009  |
| 16651007 |  |  | -0.4215 | 0.0017 |
| 16651031 |  |  | -0.4974 | 0.0187 |
| 16651145 |  |  | -0.3375 | 0.0317 |
| 16651197 |  |  | -0.4499 | 0.029  |
| 16651201 |  |  | -0.7449 | 0.0244 |
| 16651247 |  |  | -0.653  | 0.0038 |
| 16651259 |  |  | -0.4074 | 0.0345 |
| 16651353 |  |  | -0.7377 | 0.0136 |
| 16651433 |  |  | -0.5414 | 0.0313 |
| 16651479 |  |  | -0.5317 | 0.0266 |
| 16651511 |  |  | -0.3578 | 0.0419 |
| 16651599 |  |  | -0.6019 | 0.0098 |
| 16651601 |  |  | -0.589  | 0.026  |
| 16651603 |  |  | -0.8485 | 0.0003 |
| 16651605 |  |  | -0.8341 | 0.0002 |
| 16651607 |  |  | -0.537  | 0.0025 |
| 16651609 |  |  | -0.7411 | 0.012  |
| 16651611 |  |  | -0.7983 | 0.0094 |
| 16651613 |  |  | -0.7308 | 0.0024 |
| 16651621 |  |  | -0.7445 | 0.0009 |
| 16651623 |  |  | -0.5176 | 0.0051 |
| 16651625 |  |  | -0.5641 | 0.0075 |
| 16651627 |  |  | -0.667  | 0.0016 |
| 16651633 |  |  | -0.6228 | 0.0166 |
| 16651635 |  |  | -0.6049 | 0.0149 |
| 16651637 |  |  | -1.0233 | 0.0025 |
| 16651639 |  |  | -0.8861 | 0.0003 |
| 16651643 |  |  | -0.6126 | 0.0106 |
| 16651645 |  |  | -0.5647 | 0.0261 |
| 16651647 |  |  | -0.5198 | 0.0323 |
| 16651649 |  |  | -0.6251 | 0.0095 |
| 16651653 |  |  | -0.3541 | 0.0255 |
| 16651655 |  |  | -0.5716 | 0.0368 |
| 16651659 |  |  | -0.4025 | 0.0482 |
| 16651661 |  |  | -0.4155 | 0.0439 |
| 16651663 |  |  | -0.9452 | 0.0018 |
| 16651665 |  |  | -0.9745 | 0.0005 |
| 16651667 |  |  | -0.9946 | 0      |
| 16651669 |  |  | -0.4165 | 0.0403 |
| 16651671 |  |  | -1.1214 | 0.0001 |
| 16651673 |  |  | -1.1418 | 0.0001 |
| 16651675 |  |  | -0.9303 | 0.0003 |
| 16651677 |  |  | -1.1325 | 0.0001 |
| 16651679 |  |  | -0.6242 | 0.0039 |
| 16651681 |  |  | -0.8053 | 0.0003 |
| 16651683 |  |  | -0.7543 | 0.0002 |
| 16651685 |  |  | -0.4899 | 0.0148 |
| 16651689 |  |  | -0.4437 | 0.0097 |
| 16651727 |  |  | -0.4462 | 0.0153 |
| 16651937 |  |  | -0.5437 | 0.0097 |
| 16652239 |  |  | -0.308  | 0.0308 |
| 16652301 |  |  | -0.4796 | 0.0396 |
| 16652337 |  |  | -0.2369 | 0.0441 |
| 16652427 |  |  | -0.4405 | 0.0123 |
| 16652601 |  |  | -0.5437 | 0.0097 |
| 16652821 |  |  | -0.5402 | 0.0353 |
| 16652831 |  |  | -0.6031 | 0.0498 |
| 16652851 |  |  | -0.5564 | 0.0082 |
| 16652875 |  |  | -0.6573 | 0.0177 |

|          |  |  |         |        |
|----------|--|--|---------|--------|
| 16652881 |  |  | -0.5004 | 0.0205 |
| 16652891 |  |  | -0.5952 | 0.0269 |
| 16652895 |  |  | -0.4065 | 0.0152 |
| 16652933 |  |  | -0.298  | 0.0337 |
| 16652991 |  |  | -0.4642 | 0.045  |
| 16653005 |  |  | -0.4028 | 0.0476 |
| 16653007 |  |  | -0.5355 | 0.049  |
| 16653017 |  |  | -0.3426 | 0.0442 |
| 16653101 |  |  | -0.8457 | 0.003  |
| 16653129 |  |  | -0.4511 | 0.0279 |
| 16653143 |  |  | -0.381  | 0.0205 |
| 16653151 |  |  | -0.5928 | 0.0104 |
| 16653159 |  |  | -0.462  | 0.0231 |
| 16653167 |  |  | -0.5399 | 0.0265 |
| 16653175 |  |  | -0.3487 | 0.0462 |
| 16653271 |  |  | -0.3484 | 0.0116 |
| 16653319 |  |  | -0.3099 | 0.0443 |
| 16653369 |  |  | -0.4663 | 0.0303 |
| 16653371 |  |  | -0.6489 | 0.0305 |
| 16653421 |  |  | -0.3099 | 0.0443 |
| 16653471 |  |  | -0.4663 | 0.0303 |
| 16653473 |  |  | -0.6489 | 0.0305 |
| 16653651 |  |  | -0.924  | 0.0039 |
| 16653665 |  |  | -0.9238 | 0.0002 |
| 16653669 |  |  | -0.4981 | 0.0063 |
| 16653671 |  |  | -0.6895 | 0.0052 |
| 16653681 |  |  | -0.4284 | 0.0008 |
| 16653683 |  |  | -1.1159 | 0      |
| 16653689 |  |  | -0.7903 | 0.005  |
| 16653703 |  |  | -0.4268 | 0.0376 |
| 16653707 |  |  | -0.5372 | 0.0274 |
| 16653711 |  |  | -0.4407 | 0.0433 |
| 16653713 |  |  | -0.756  | 0.0067 |
| 16653721 |  |  | -0.476  | 0.0285 |
| 16653725 |  |  | -0.5667 | 0.0329 |
| 16653727 |  |  | -0.6564 | 0.0059 |
| 16653729 |  |  | -0.6157 | 0.009  |
| 16653735 |  |  | -0.8338 | 0.0009 |
| 16653743 |  |  | -0.791  | 0.0003 |
| 16653745 |  |  | -0.7616 | 0.0002 |
| 16653747 |  |  | -0.5782 | 0.0012 |
| 16653749 |  |  | -0.7217 | 0.0015 |
| 16653751 |  |  | -0.6158 | 0.003  |
| 16653755 |  |  | -0.6381 | 0.003  |
| 16653757 |  |  | -0.6442 | 0.0005 |
| 16653761 |  |  | -0.4258 | 0.0302 |
| 16653767 |  |  | -0.5548 | 0.0092 |
| 16653773 |  |  | -0.509  | 0.0231 |
| 16653777 |  |  | -0.5019 | 0.0216 |
| 16653779 |  |  | -0.4852 | 0.0158 |
| 16653781 |  |  | -0.6917 | 0.005  |
| 16653783 |  |  | -0.8719 | 0.0022 |
| 16653793 |  |  | -0.6275 | 0.0375 |
| 16653795 |  |  | -0.4052 | 0.0165 |
| 16653797 |  |  | -0.8285 | 0.0055 |
| 16653801 |  |  | -0.5719 | 0.0497 |
| 16653803 |  |  | -0.7731 | 0.0038 |
| 16653805 |  |  | -0.4236 | 0.0122 |
| 16653809 |  |  | -0.9487 | 0.0025 |
| 16653811 |  |  | -0.8801 | 0.006  |
| 16653817 |  |  | -0.6322 | 0.0086 |

|          |  |  |         |        |
|----------|--|--|---------|--------|
| 16653819 |  |  | -0.9489 | 0.0052 |
| 16653825 |  |  | -0.5955 | 0.0324 |
| 16653829 |  |  | -0.6044 | 0.0373 |
| 16653863 |  |  | -0.5297 | 0.0102 |
| 16653867 |  |  | -0.6312 | 0.006  |
| 16653917 |  |  | -0.4603 | 0.0036 |
| 16654069 |  |  | -0.281  | 0.0337 |
| 16654083 |  |  | -0.3053 | 0.012  |
| 16654087 |  |  | -0.4113 | 0.0166 |
| 16654111 |  |  | -0.5106 | 0.0075 |
| 16654129 |  |  | -0.8554 | 0.0027 |
| 16654185 |  |  | -0.5105 | 0.0064 |
| 16654223 |  |  | -0.6836 | 0.0259 |
| 16654231 |  |  | -0.5346 | 0.0173 |
| 16654241 |  |  | -0.5409 | 0.0088 |
| 16654267 |  |  | -0.3435 | 0.0151 |
| 16654271 |  |  | -0.3526 | 0.0427 |
| 16654331 |  |  | -0.8293 | 0.013  |
| 16654337 |  |  | -0.3675 | 0.0362 |
| 16654447 |  |  | -0.5532 | 0.0164 |
| 16654451 |  |  | -0.3738 | 0.0046 |
| 16654467 |  |  | -0.5147 | 0.0223 |
| 16654469 |  |  | -0.5531 | 0.0082 |
| 16654483 |  |  | -0.3568 | 0.0324 |
| 16654563 |  |  | -0.5505 | 0.0227 |
| 16654587 |  |  | -0.7474 | 0.0097 |
| 16654589 |  |  | -0.9787 | 0.0006 |
| 16654591 |  |  | -0.712  | 0.0062 |
| 16654595 |  |  | -0.5212 | 0.0191 |
| 16654693 |  |  | -0.5132 | 0.027  |
| 16654717 |  |  | -0.3317 | 0.0391 |
| 16654723 |  |  | -0.6451 | 0.0026 |
| 16654783 |  |  | -0.9098 | 0.001  |
| 16654785 |  |  | -0.698  | 0.0031 |
| 16654789 |  |  | -0.212  | 0.0134 |
| 16654793 |  |  | -0.6449 | 0.0256 |
| 16654795 |  |  | -1.0518 | 0.0008 |
| 16654797 |  |  | -0.8393 | 0.001  |
| 16654803 |  |  | -0.7603 | 0.0018 |
| 16654805 |  |  | -0.7953 | 0.0111 |
| 16654807 |  |  | -0.8857 | 0.0004 |
| 16654813 |  |  | -0.6926 | 0.0053 |
| 16654825 |  |  | -0.5459 | 0.0206 |
| 16654993 |  |  | -0.3651 | 0.0449 |
| 16655043 |  |  | -0.7835 | 0.0074 |
| 16655057 |  |  | -0.4853 | 0.0223 |
| 16655067 |  |  | -0.5402 | 0.0204 |
| 16655085 |  |  | -0.7768 | 0.0379 |
| 16655109 |  |  | -0.1884 | 0.0335 |
| 16655225 |  |  | -0.4063 | 0.0343 |
| 16655243 |  |  | -0.4253 | 0.0189 |
| 16655249 |  |  | -0.8195 | 0.0104 |
| 16655251 |  |  | -0.6378 | 0.0445 |
| 16655259 |  |  | -0.3459 | 0.0253 |
| 16655345 |  |  | -0.2908 | 0.0364 |
| 16655387 |  |  | -0.7525 | 0.005  |
| 16655389 |  |  | -0.5962 | 0.0254 |
| 16655393 |  |  | -0.733  | 0.0036 |
| 16655423 |  |  | -0.6261 | 0.0036 |
| 16655429 |  |  | -0.465  | 0.0268 |
| 16655457 |  |  | -0.4217 | 0.0155 |

|          |              |                                                        |         |        |
|----------|--------------|--------------------------------------------------------|---------|--------|
| 16655465 |              |                                                        | -0.8523 | 0.0007 |
| 16655471 |              |                                                        | -0.6467 | 0.0105 |
| 16655603 |              |                                                        | -0.3448 | 0.0135 |
| 16655645 |              |                                                        | -0.3385 | 0.0275 |
| 16655749 |              |                                                        | -0.3456 | 0.0194 |
| 16655757 |              |                                                        | -0.6909 | 0.0058 |
| 16655777 |              |                                                        | -0.1859 | 0.0377 |
| 16655881 |              |                                                        | -0.3109 | 0.0363 |
| 16655913 |              |                                                        | -0.3492 | 0.046  |
| 16655997 |              |                                                        | -0.3748 | 0.0402 |
| 16656055 |              |                                                        | -0.4779 | 0.0392 |
| 16656057 |              |                                                        | -0.6122 | 0.0027 |
| 16656197 |              |                                                        | -0.666  | 0.0076 |
| 16656323 |              |                                                        | -0.4531 | 0.0216 |
| 16656355 |              |                                                        | -0.5989 | 0.0096 |
| 16656369 |              |                                                        | -0.654  | 0.0158 |
| 16656397 |              |                                                        | -0.8542 | 0.001  |
| 16656497 |              |                                                        | -0.5908 | 0.0159 |
| 16656505 |              |                                                        | -0.5354 | 0.0071 |
| 16656549 |              |                                                        | -0.3371 | 0.0129 |
| 16656681 |              |                                                        | -0.7818 | 0.0004 |
| 16656695 |              |                                                        | -0.5613 | 0.0105 |
| 16656697 |              |                                                        | -0.5623 | 0.035  |
| 16657117 |              |                                                        | -0.5346 | 0.0358 |
| 16657149 |              |                                                        | -0.5602 | 0.0265 |
| 16657171 |              |                                                        | -0.5614 | 0.0171 |
| 16657181 |              |                                                        | -0.4184 | 0.0347 |
| 16657189 |              |                                                        | -0.6268 | 0.0064 |
| 16657243 |              |                                                        | -0.4379 | 0.015  |
| 16657265 |              |                                                        | -0.8363 | 0.0027 |
| 16657271 |              |                                                        | -0.5015 | 0.0159 |
| 16657289 |              |                                                        | -0.519  | 0.0077 |
| 16657303 |              |                                                        | -0.4703 | 0.0254 |
| 16657367 |              |                                                        | -0.3249 | 0.0377 |
| 16657413 |              |                                                        | -0.2801 | 0.0384 |
| 16658159 | ARHGEF16     | Rho guanine nucleotide exchange factor (GEF) 16        | -0.1618 | 0.0023 |
| 16658457 | THAP3        | THAP domain containing, apoptosis associated protein 3 | -0.1789 | 0.0299 |
| 16658571 |              |                                                        | -0.3492 | 0.0341 |
| 16658800 |              |                                                        | -0.1415 | 0.0162 |
| 16659102 | CLCN6        | chloride channel, voltage-sensitive 6                  | -0.4279 | 0.0065 |
| 16659133 | NPPA-AS1     | NPPA antisense RNA 1 (non-protein coding)              | -0.1806 | 0.0328 |
| 16659343 | AADA4        | arylacetamide deacetylase-like 4                       | -0.1318 | 0.0246 |
| 16659395 | PRAMEF22     | PRAME family member 22                                 | -0.5443 | 0.01   |
| 16659455 |              |                                                        | -0.4538 | 0.0323 |
| 16660098 |              |                                                        | -0.3756 | 0.0161 |
| 16660282 | PLA2G5       | phospholipase A2, group V                              | -0.2776 | 0.0372 |
| 16660388 | LOC100506824 | uncharacterized LOC100506824                           | -0.3749 | 0.0009 |
| 16660436 | ALPL         | alkaline phosphatase, liver/bone/kidney                | -0.998  | 0.0124 |
| 16660468 | CELA3B       | chymotrypsin-like elastase family, member 3B           | -0.2481 | 0.0089 |
| 16660676 |              |                                                        | -0.5361 | 0.0326 |
| 16660713 | LYPLA2       | lysophospholipase II                                   | -0.2036 | 0.0202 |
| 16661206 | RPS6KA1      | ribosomal protein S6 kinase, 90kDa, polypeptide 1      | -0.2456 | 0.0364 |
| 16661255 | ARID1A       | AT rich interactive domain 1A (SWI-like)               | -0.1887 | 0.0483 |
| 16661684 |              |                                                        | -0.1263 | 0.0438 |
| 16661914 |              |                                                        | -0.2594 | 0.0167 |
| 16662206 |              |                                                        | -0.426  | 0.0014 |
| 16662338 | ZMYM1        | zinc finger, MYM-type 1                                | -0.3224 | 0.0137 |
| 16662648 | CDCA8        | cell division cycle associated 8                       | -0.7191 | 0.0057 |
| 16662690 |              |                                                        | -0.4716 | 0.016  |

|          |            |                                                                              |         |        |
|----------|------------|------------------------------------------------------------------------------|---------|--------|
| 16662692 | UTP11L     | UTP11-like, U3 small nucleolar ribonucleoprotein, (yeast)                    | -0.3654 | 0.0159 |
| 16662755 | MACF1      | microtubule-actin crosslinking factor 1                                      | -0.2658 | 0.0222 |
| 16662890 | BMP8A      | bone morphogenetic protein 8a                                                | -0.1821 | 0.027  |
| 16662993 | RLF        | rearranged L-myc fusion                                                      | -0.3516 | 0.0273 |
| 16663514 | CDC20      | cell division cycle 20 homolog (S. cerevisiae)                               | -0.8101 | 0.0029 |
| 16663694 | ST3GAL3    | ST3 beta-galactoside alpha-2,3-sialyltransferase 3                           | -0.3123 | 0.0082 |
| 16663812 | B4GALT2    | UDP-Gal:betaGlcNAc beta 1,4- galactosyltransferase, polypeptide 2            | -0.2688 | 0.0403 |
| 16664243 | RAD54L     | RAD54-like (S. cerevisiae)                                                   | -0.4299 | 0.0031 |
| 16664281 | NSUN4      | NOP2/Sun domain family, member 4                                             | -0.354  | 0.0054 |
| 16665099 |            |                                                                              | -0.1364 | 0.0396 |
| 16665437 | MIR3116-1  | microRNA 3116-1                                                              | -0.3635 | 0.046  |
| 16665960 |            |                                                                              | -0.6808 | 0.0283 |
| 16667000 | LRR8D      | leucine rich repeat containing 8 family, member D                            | -0.4065 | 0.0359 |
| 16667183 | MTF2       | metal response element binding transcription factor 2                        | -0.451  | 0.0264 |
| 16667456 | PTBP2      | polypyrimidine tract binding protein 2                                       | -0.4232 | 0.0278 |
| 16667702 | VCAM1      | vascular cell adhesion molecule 1                                            | -1.2694 | 0.0096 |
| 16668079 | GPSM2      | G-protein signaling modulator 2                                              | -0.7583 | 0.0144 |
| 16668503 |            |                                                                              | -0.3969 | 0.0093 |
| 16669288 | WDR3       | WD repeat domain 3                                                           | -0.5228 | 0.0135 |
| 16669361 | HAO2-IT1   | HAO2 intronic transcript 1 (non-protein coding)                              | -0.5132 | 0.0403 |
| 16669364 | HSD3B2     | hydroxy-delta-5-steroid dehydrogenase, 3 beta- and steroid delta-isomerase 2 | -1.5578 | 0.0057 |
| 16669389 | PHGDH      | phosphoglycerate dehydrogenase                                               | -0.3125 | 0.0107 |
| 16669414 |            |                                                                              | -0.3579 | 0.0149 |
| 16669566 |            |                                                                              | -0.3882 | 0.0345 |
| 16669573 | NBPF9      | neuroblastoma breakpoint family, member 9                                    | -0.4014 | 0.0014 |
| 16669630 |            |                                                                              | -0.5369 | 0.0031 |
| 16669721 | NBPF10     | neuroblastoma breakpoint family, member 10                                   | -0.2182 | 0.0277 |
| 16669850 | ITGA10     | integrin, alpha 10                                                           | -0.1961 | 0.0096 |
| 16669997 | NBPF12     | neuroblastoma breakpoint family, member 12                                   | -0.3348 | 0.0372 |
| 16670197 |            |                                                                              | -0.3882 | 0.0345 |
| 16670250 | NBPF16     | neuroblastoma breakpoint family, member 16                                   | -0.3448 | 0.0059 |
| 16670359 |            |                                                                              | -0.5239 | 0.005  |
| 16670377 | HIST2H4B   | histone cluster 2, H4b                                                       | -0.5592 | 0.0175 |
| 16670383 | HIST2H2AA4 | histone cluster 2, H2aa4                                                     | -0.6921 | 0.0008 |
| 16670387 | HIST2H3D   | histone cluster 2, H3d                                                       | -0.8126 | 0.004  |
| 16670499 | PRPF3      | PRP3 pre-mRNA processing factor 3 homolog (S. cerevisiae)                    | -0.4336 | 0.0101 |
| 16671049 | LCE2A      | late cornified envelope 2A                                                   | -0.3721 | 0.0015 |
| 16671217 | INTS3      | integrator complex subunit 3                                                 | -0.3732 | 0.002  |
| 16671325 | RPS27      | ribosomal protein S27                                                        | -0.3834 | 0.0133 |
| 16671334 | UBAP2L     | ubiquitin associated protein 2-like                                          | -0.2137 | 0.0365 |
| 16671379 |            |                                                                              | -0.3232 | 0.0386 |
| 16671503 | CKS1B      | CDC28 protein kinase regulatory subunit 1B                                   | -0.4226 | 0.0127 |
| 16671632 | EFNA3      | ephrin-A3                                                                    | -0.4798 | 0.0369 |
| 16671653 | SLC50A1    | solute carrier family 50 (sugar transporter), member 1                       | -0.5672 | 0.0154 |
| 16671738 | FDPS       | farnesyl diphosphate synthase                                                | -0.6975 | 0.0014 |
| 16671784 | POU5F1P4   | POU class 5 homeobox 1 pseudogene 4                                          | -0.3774 | 0.0239 |
| 16671786 | ASH1L-AS1  | ASH1L antisense RNA 1 (non-protein coding)                                   | -0.2667 | 0.0147 |
| 16671886 |            |                                                                              | -0.1059 | 0.0374 |
| 16671992 | SLC25A44   | solute carrier family 25, member 44                                          | -0.3031 | 0.0236 |
| 16672170 | PRCC       | papillary renal cell carcinoma (translocation-associated)                    | -0.3456 | 0.0134 |
| 16672975 | DUSP12     | dual specificity phosphatase 12                                              | -0.2653 | 0.01   |
| 16673056 | UAP1       | UDP-N-acetylglucosamine pyrophosphorylase 1                                  | -0.3766 | 0.0241 |
| 16673189 | RNU5F-6P   | RNA, U5F small nuclear 6, pseudogene                                         | -0.4088 | 0.0032 |
| 16673191 | PBX1       | pre-B-cell leukemia homeobox 1                                               | -0.753  | 0.0025 |
| 16673229 | PBX1       | pre-B-cell leukemia homeobox 1                                               | -0.9061 | 0.0043 |
| 16673767 | PRRC2C     | proline-rich coiled-coil 2C                                                  | -0.2878 | 0.0398 |
| 16673877 | MIR3120    | microRNA 3120                                                                | -0.5251 | 0.0164 |

|          |           |                                                                                                |         |        |
|----------|-----------|------------------------------------------------------------------------------------------------|---------|--------|
| 16674355 | SOAT1     | sterol O-acyltransferase 1                                                                     | -0.5572 | 0.0065 |
| 16674767 | DHX9      | DEAH (Asp-Glu-Ala-His) box polypeptide 9                                                       | -0.3256 | 0.0034 |
| 16675034 |           |                                                                                                | -0.4545 | 0.0062 |
| 16675236 |           |                                                                                                | -0.5188 | 0.0324 |
| 16675334 | TROVE2    | TROVE domain family, member 2                                                                  | -0.2958 | 0.0376 |
| 16675354 | CDC73     | cell division cycle 73, Paf1/RNA polymerase II complex component, homolog (S. cerevisiae)      | -0.2929 | 0.0194 |
| 16675794 | NAV1      | neuron navigator 1                                                                             | -0.475  | 0.0112 |
| 16675844 | IPO9      | importin 9                                                                                     | -0.3283 | 0.01   |
| 16675889 | TIMM17A   | translocase of inner mitochondrial membrane 17 homolog A (yeast)                               | -0.2661 | 0.0255 |
| 16676228 | ZC3H11A   | zinc finger CCCH-type containing 11A                                                           | -0.4339 | 0.0021 |
| 16676258 | ZBED6     | zinc finger, BED-type containing 6                                                             | -0.9681 | 0.0002 |
| 16676263 | ZBED6     | zinc finger, BED-type containing 6                                                             | -0.96   | 0      |
| 16676461 | CDK18     | cyclin-dependent kinase 18                                                                     | -0.2694 | 0.0068 |
| 16676520 |           |                                                                                                | -0.264  | 0.0032 |
| 16677104 | RCOR3     | REST corepressor 3                                                                             | -0.3312 | 0.002  |
| 16677201 | DTL       | denticleless E3 ubiquitin protein ligase homolog (Drosophila)                                  | -1.0201 | 0.0049 |
| 16677324 | FLVCR1    | feline leukemia virus subgroup C cellular receptor 1                                           | -0.5402 | 0.0009 |
| 16677407 | SMYD2     | SET and MYND domain containing 2                                                               | -0.6037 | 0.0216 |
| 16677425 | CENPF     | centromere protein F, 350/400kDa (mitosin)                                                     | -1.0798 | 0.0055 |
| 16677646 |           |                                                                                                | -0.4524 | 0.0114 |
| 16677913 | DEGS1     | delta(4)-desaturase, sphingolipid 1                                                            | -0.4052 | 0.0001 |
| 16678105 | SRP9      | signal recognition particle 9kDa                                                               | -0.2606 | 0.0137 |
| 16678341 |           |                                                                                                | -0.5085 | 0.0293 |
| 16678579 | GALNT2    | UDP-N-acetyl-alpha-D-galactosamine:polypeptide N-acetylgalactosaminyltransferase 2 (GalNAc-T2) | -0.4418 | 0.0107 |
| 16678966 | TBCE      | tubulin folding cofactor E                                                                     | -0.3896 | 0.0021 |
| 16679411 | EXO1      | exonuclease 1                                                                                  | -0.5193 | 0.0334 |
| 16679506 |           |                                                                                                | -0.1776 | 0.0173 |
| 16679546 | DESI2     | desumoylating isopeptidase 2                                                                   | -0.4626 | 0.0054 |
| 16679557 | COX20     | COX20 Cox2 chaperone homolog (S. cerevisiae)                                                   | -0.486  | 0.0286 |
| 16679686 |           |                                                                                                | -0.729  | 0.0057 |
| 16679832 | ZNF672    | zinc finger protein 672                                                                        | -0.2983 | 0.0045 |
| 16679972 | FAM41C    | family with sequence similarity 41, member C                                                   | -0.1958 | 0.0403 |
| 16679994 | NOC2L     | nucleolar complex associated 2 homolog (S. cerevisiae)                                         | -0.2263 | 0.0286 |
| 16680258 | MXRA8     | matrix-remodelling associated 8                                                                | -0.3305 | 0.0268 |
| 16680446 | NADK      | NAD kinase                                                                                     | -0.2575 | 0.0387 |
| 16681192 | NOL9      | nucleolar protein 9                                                                            | -0.3144 | 0.0281 |
| 16681370 | ENO1      | enolase 1, (alpha)                                                                             | -0.5287 | 0.0135 |
| 16681390 | ENO1-IT1  | ENO1 intronic transcript 1 (non-protein coding)                                                | -0.5342 | 0.0069 |
| 16681733 |           |                                                                                                | -0.1928 | 0.0217 |
| 16681940 | LRRC38    | leucine rich repeat containing 38                                                              | -1.403  | 0.0042 |
| 16681996 | CASP9     | caspase 9, apoptosis-related cysteine peptidase                                                | -0.2422 | 0.0061 |
| 16682225 | NBPF1     | neuroblastoma breakpoint family, member 1                                                      | -0.8929 | 0.0014 |
| 16682487 | IFFO2     | intermediate filament family orphan 2                                                          | -0.6942 | 0.0005 |
| 16682499 | UBR4      | ubiquitin protein ligase E3 component n-recognin 4                                             | -0.2411 | 0.0496 |
| 16682702 |           |                                                                                                | -0.5638 | 0.0212 |
| 16682733 | TMCO4     | transmembrane and coiled-coil domains 4                                                        | -0.3358 | 0.0077 |
| 16682989 | ECE1      | endothelin converting enzyme 1                                                                 | -0.4654 | 0.0044 |
| 16683022 | RAP1GAP   | RAP1 GTPase activating protein                                                                 | -0.7816 | 0.0009 |
| 16683237 | MIR4253   | microRNA 4253                                                                                  | -0.2723 | 0.0208 |
| 16683358 | E2F2      | E2F transcription factor 2                                                                     | -0.2016 | 0.025  |
| 16684461 | COL16A1   | collagen, type XVI, alpha 1                                                                    | -0.1892 | 0.0216 |
| 16684851 |           |                                                                                                | -0.1553 | 0.0417 |
| 16684870 | PHC2      | polyhomeotic homolog 2 (Drosophila)                                                            | -0.2084 | 0.0309 |
| 16685031 | LOC653160 | uncharacterized LOC653160                                                                      | -0.1787 | 0.0096 |
| 16685165 | CLSPN     | claspin                                                                                        | -0.3462 | 0.0398 |
| 16685330 | GRIK3     | glutamate receptor, ionotropic, kainate 3                                                      | -0.2373 | 0.0367 |
| 16685704 | HEYL      | hairy/enhancer-of-split related with YRPW motif-like                                           | -0.729  | 0.0077 |



|          |              |                                                                        |         |        |
|----------|--------------|------------------------------------------------------------------------|---------|--------|
| 16685953 | GUCA2A       | guanylate cyclase activator 2A (guanylin)                              | -0.2042 | 0.0087 |
| 16686010 | LEPRE1       | leucine proline-enriched proteoglycan (leprecan) 1                     | -0.3906 | 0.038  |
| 16686176 |              |                                                                        | -0.2236 | 0.0408 |
| 16686297 | PTCH2        | patched 2                                                              | -0.2107 | 0.0274 |
| 16686784 | TAL1         | T-cell acute lymphocytic leukemia 1                                    | -0.2053 | 0.0346 |
| 16686796 | STIL         | SCL/TAL1 interrupting locus                                            | -0.5247 | 0.0326 |
| 16686982 |              |                                                                        | -0.2507 | 0.0324 |
| 16687188 | ORC1         | origin recognition complex, subunit 1                                  | -0.4584 | 0.0058 |
| 16687397 |              |                                                                        | -0.1266 | 0.0268 |
| 16688007 | KANK4        | KN motif and ankyrin repeat domains 4                                  | -0.1505 | 0.019  |
| 16688115 |              |                                                                        | -0.2863 | 0.0061 |
| 16688149 |              |                                                                        | -0.3414 | 0.0046 |
| 16688386 | DEPDC1       | DEP domain containing 1                                                | -0.7518 | 0.0172 |
| 16689240 |              |                                                                        | -0.5144 | 0.0063 |
| 16690139 | EXTL2        | exostoses (multiple)-like 2                                            | -0.5959 | 0.0082 |
| 16690211 | COL11A1      | collagen, type XI, alpha 1                                             | -1.0448 | 0.0426 |
| 16690930 | ST7L         | suppression of tumorigenicity 7 like                                   | -0.2102 | 0.0435 |
| 16691023 | SLC16A1      | solute carrier family 16, member 1 (monocarboxylic acid transporter 1) | -0.4871 | 0.0032 |
| 16691923 |              |                                                                        | -0.6014 | 0.0025 |
| 16691961 |              |                                                                        | -0.6014 | 0.0025 |
| 16692112 | GNRHR2       | gonadotropin-releasing hormone (type 2) receptor 2                     | -0.2203 | 0.046  |
| 16692135 | POLR3C       | polymerase (RNA) III (DNA directed) polypeptide C (62kD)               | -0.3509 | 0.0146 |
| 16692168 | GPR89A       | G protein-coupled receptor 89A                                         | -0.309  | 0.0267 |
| 16692209 | NBPF11       | neuroblastoma breakpoint family, member 11                             | -0.4033 | 0.0033 |
| 16692297 | PRKAB2       | protein kinase, AMP-activated, beta 2 non-catalytic subunit            | -0.5292 | 0.0148 |
| 16692383 | NBPF24       | neuroblastoma breakpoint family, member 24                             | -0.3961 | 0.0042 |
| 16692433 |              |                                                                        | -0.4772 | 0.0061 |
| 16692452 | NBPF14       | neuroblastoma breakpoint family, member 14                             | -0.3252 | 0.0377 |
| 16692555 |              |                                                                        | -0.6483 | 0.0093 |
| 16692557 |              |                                                                        | -0.5766 | 0.0137 |
| 16692570 | LOC388692    | uncharacterized LOC388692                                              | -0.4513 | 0.0347 |
| 16692583 | FAM72C       | family with sequence similarity 72, member C                           | -0.4509 | 0.0122 |
| 16692597 | LOC388692    | uncharacterized LOC388692                                              | -0.4513 | 0.0347 |
| 16692616 | HIST2H3D     | histone cluster 2, H3d                                                 | -0.8126 | 0.004  |
| 16692620 | HIST2H2AA4   | histone cluster 2, H2aa4                                               | -0.917  | 0.0007 |
| 16692626 | HIST2H4B     | histone cluster 2, H4b                                                 | -0.5592 | 0.0175 |
| 16692632 | HIST2H2BE    | histone cluster 2, H2be                                                | -0.7009 | 0.0073 |
| 16692667 | MTMR11       | myotubularin related protein 11                                        | -0.363  | 0.0334 |
| 16692724 | ANP32E       | acidic (leucine-rich) nuclear phosphoprotein 32 family, member E       | -0.4516 | 0.0029 |
| 16692764 | LOC100289061 | uncharacterized LOC100289061                                           | -0.1648 | 0.0093 |
| 16692890 |              |                                                                        | -0.2364 | 0.0104 |
| 16692943 | CDC42SE1     | CDC42 small effector 1                                                 | -0.2951 | 0.0385 |
| 16693030 | PI4KB        | phosphatidylinositol 4-kinase, catalytic, beta                         | -0.3414 | 0.0226 |
| 16693345 |              |                                                                        | -0.1637 | 0.0159 |
| 16693361 | SPRR2B       | small proline-rich protein 2B                                          | -1.9682 | 0.0072 |
| 16693515 | ILF2         | interleukin enhancer binding factor 2, 45kDa                           | -0.4215 | 0.0075 |
| 16693516 |              |                                                                        | -0.4156 | 0.0057 |
| 16693517 |              |                                                                        | -0.4535 | 0.0192 |
| 16693519 |              |                                                                        | -0.4948 | 0.0031 |
| 16693521 |              |                                                                        | -0.4984 | 0.0347 |
| 16693522 |              |                                                                        | -0.4586 | 0.006  |
| 16693523 |              |                                                                        | -0.5024 | 0.004  |
| 16693524 |              |                                                                        | -0.4646 | 0.0057 |
| 16693525 |              |                                                                        | -0.5107 | 0.0113 |
| 16693528 |              |                                                                        | -0.5092 | 0.0048 |
| 16693530 |              |                                                                        | -0.3924 | 0.0291 |
| 16693531 |              |                                                                        | -0.4044 | 0.032  |

|          |              |                                                                              |         |        |
|----------|--------------|------------------------------------------------------------------------------|---------|--------|
| 16693532 |              |                                                                              | -0.4794 | 0.0083 |
| 16693533 |              |                                                                              | -0.3869 | 0.0165 |
| 16693536 |              |                                                                              | -0.2846 | 0.0369 |
| 16693559 | DENND4B      | DENN/MADD domain containing 4B                                               | -0.3569 | 0.0041 |
| 16693601 | CRTC2        | CREB regulated transcription coactivator 2                                   | -0.3257 | 0.0373 |
| 16693762 | C1orf43      | chromosome 1 open reading frame 43                                           | -0.2854 | 0.039  |
| 16693996 | THBS3        | thrombospondin 3                                                             | -0.4478 | 0.0018 |
| 16694094 | FAM189B      | family with sequence similarity 189, member B                                | -0.4385 | 0.0283 |
| 16694117 | SCAMP3       | secretory carrier membrane protein 3                                         | -0.302  | 0.0359 |
| 16694135 | CLK2         | CDC-like kinase 2                                                            | -0.3013 | 0.0075 |
| 16694176 |              |                                                                              | -1.2981 | 0.0016 |
| 16694178 | RUSC1-AS1    | RUSC1 antisense RNA 1 (non-protein coding)                                   | -0.3942 | 0.0172 |
| 16694188 | ASH1L        | ash1 (absent, small, or homeotic)-like (Drosophila)                          | -0.2393 | 0.0312 |
| 16694322 | RIT1         | Ras-like without CAAX 1                                                      | -0.6026 | 0.0013 |
| 16694529 | CCT3         | chaperonin containing TCP1, subunit 3 (gamma)                                | -0.2743 | 0.036  |
| 16694611 |              |                                                                              | -0.6164 | 0.0377 |
| 16694716 | ISG20L2      | interferon stimulated exonuclease gene 20kDa-like 2                          | -0.5288 | 0.0009 |
| 16695189 | CCDC19       | coiled-coil domain containing 19                                             | -0.1722 | 0.0141 |
| 16695262 | KCNJ10       | potassium inwardly-rectifying channel, subfamily J, member 10                | -0.1716 | 0.0111 |
| 16695319 | DCAF8        | DDB1 and CUL4 associated factor 8                                            | -0.159  | 0.0372 |
| 16695741 | OLFML2B      | olfactomedin-like 2B                                                         | -0.6962 | 0.0088 |
| 16695823 | LOC100505795 | uncharacterized LOC100505795                                                 | -0.3708 | 0.0086 |
| 16696387 | DNM3OS       | DNM3 opposite strand/antisense RNA (non-protein coding)                      | -0.4388 | 0.0166 |
| 16696490 | CENPL        | centromere protein L                                                         | -0.3697 | 0.0006 |
| 16696531 | SNORD78      | small nucleolar RNA, C/D box 78                                              | -0.7797 | 0.0074 |
| 16696689 | ASTN1        | astrotactin 1                                                                | -0.8115 | 0.0369 |
| 16696870 | TOR1AIP2     | torsin A interacting protein 2                                               | -0.3494 | 0.0421 |
| 16696903 | ACBD6        | acyl-CoA binding domain containing 6                                         | -0.3368 | 0.024  |
| 16697245 | IVNS1ABP     | influenza virus NS1A binding protein                                         | -0.5731 | 0.0004 |
| 16697392 |              |                                                                              | -0.4734 | 0.0496 |
| 16697461 |              |                                                                              | -0.379  | 0.0239 |
| 16697544 | ASPM         | asp (abnormal spindle) homolog, microcephaly associated (Drosophila)         | -1.3611 | 0.0006 |
| 16697580 | ZBTB41       | zinc finger and BTB domain containing 41                                     | -0.2835 | 0.0351 |
| 16697695 | KIF14        | kinesin family member 14                                                     | -0.7834 | 0.0057 |
| 16697843 | TMEM9        | transmembrane protein 9                                                      | -0.2801 | 0.0083 |
| 16697962 | IPO9-AS1     | IPO9 antisense RNA 1 (non-protein coding)                                    | -0.3952 | 0.0187 |
| 16697968 |              |                                                                              | -0.217  | 0.0287 |
| 16698023 | UBE2T        | ubiquitin-conjugating enzyme E2T (putative)                                  | -0.6967 | 0.0049 |
| 16698049 | KDM5B        | lysine (K)-specific demethylase 5B                                           | -0.5435 | 0.0044 |
| 16698556 | SLC41A1      | solute carrier family 41, member 1                                           | -0.695  | 0.0019 |
| 16698872 |              |                                                                              | -0.1582 | 0.0056 |
| 16698984 | NEK2         | NIMA (never in mitosis gene a)-related kinase 2                              | -0.5886 | 0.0071 |
| 16699021 | INTS7        | integrator complex subunit 7                                                 | -0.2822 | 0.0494 |
| 16699174 | PTPN14       | protein tyrosine phosphatase, non-receptor type 14                           | -0.3982 | 0.0223 |
| 16699290 | ESRRG        | estrogen-related receptor gamma                                              | -0.7644 | 0.0083 |
| 16699320 | GPATCH2      | G patch domain containing 2                                                  | -0.2629 | 0.0199 |
| 16699354 |              |                                                                              | -0.1402 | 0.0239 |
| 16699392 | EPRS         | glutamyl-prolyl-tRNA synthetase                                              | -0.2881 | 0.0485 |
| 16699454 | MIR215       | microRNA 215                                                                 | -0.4104 | 0.022  |
| 16699563 |              |                                                                              | -0.1836 | 0.0154 |
| 16699590 | TAF1A        | TATA box binding protein (TBP)-associated factor, RNA polymerase I, A, 48kDa | -0.3157 | 0.0222 |
| 16699795 | NVL          | nuclear VCP-like                                                             | -0.337  | 0.0058 |
| 16699831 | MIR320B2     | microRNA 320b-2                                                              | -0.2015 | 0.0339 |
| 16699877 | LBR          | lamin B receptor                                                             | -0.2437 | 0.0127 |
| 16699932 | TMEM63A      | transmembrane protein 63A                                                    | -0.5456 | 0.0057 |
| 16700009 | SDE2         | SDE2 telomere maintenance homolog (S. pombe)                                 | -0.3341 | 0.0413 |
| 16700123 |              |                                                                              | -0.2306 | 0.036  |

|          |              |                                                                |         |        |
|----------|--------------|----------------------------------------------------------------|---------|--------|
| 16700324 | ABCB10       | ATP-binding cassette, sub-family B (MDR/TAP), member 10        | -0.2837 | 0.0138 |
| 16700363 |              |                                                                | -0.3408 | 0.0008 |
| 16700367 |              |                                                                | -0.4394 | 0.0068 |
| 16700456 | FAM89A       | family with sequence similarity 89, member A                   | -0.411  | 0.0389 |
| 16700489 | EGLN1        | egl nine homolog 1 (C. elegans)                                | -0.3959 | 0.0063 |
| 16700500 |              |                                                                | -0.3802 | 0.0289 |
| 16700621 |              |                                                                | -0.213  | 0.0094 |
| 16700678 |              |                                                                | -0.1602 | 0.0338 |
| 16700715 | RBM34        | RNA binding motif protein 34                                   | -0.3606 | 0.0313 |
| 16700778 | B3GALNT2     | beta-1,3-N-acetylgalactosaminyltransferase 2                   | -0.4492 | 0.0106 |
| 16700888 | NID1         | nidogen 1                                                      | -0.6925 | 0.0044 |
| 16701037 | GREM2        | gremlin 2                                                      | -1.3108 | 0.015  |
| 16701041 |              |                                                                | -0.5033 | 0.0382 |
| 16701119 | PLD5         | phospholipase D family, member 5                               | -1.7269 | 0.0017 |
| 16701133 |              |                                                                | -0.7101 | 0.0224 |
| 16701135 |              |                                                                | -0.4511 | 0.0167 |
| 16701440 | AHCTF1       | AT hook containing transcription factor 1                      | -0.4062 | 0.0094 |
| 16701533 | RN5S82       | RNA, 5S ribosomal 82                                           | -0.3254 | 0.0476 |
| 16701620 | OR2T10       | olfactory receptor, family 2, subfamily T, member 10           | -0.1624 | 0.0282 |
| 16701640 | SH3BP5L      | SH3-binding domain protein 5-like                              | -0.247  | 0.0202 |
| 16701657 | ZNF692       | zinc finger protein 692                                        | -0.2394 | 0.0208 |
| 16701689 |              |                                                                | -0.4832 | 0.0316 |
| 16701748 | GTPBP4       | GTP binding protein 4                                          | -0.3822 | 0.0039 |
| 16701775 | IDI2-AS1     | IDI2 antisense RNA 1 (non-protein coding)                      | -0.3582 | 0.0131 |
| 16702226 |              |                                                                | -0.1822 | 0.0118 |
| 16702351 | GATA3        | GATA binding protein 3                                         | -0.5547 | 0.0061 |
| 16702382 |              |                                                                | -0.1108 | 0.0267 |
| 16702650 | MIR1265      | microRNA 1265                                                  | -0.1655 | 0.0335 |
| 16702685 | SUV39H2      | suppressor of variegation 3-9 homolog 2 (Drosophila)           | -0.3826 | 0.0132 |
| 16702967 | ARL5B        | ADP-ribosylation factor-like 5B                                | -0.4348 | 0.0322 |
| 16703110 |              |                                                                | -0.2786 | 0.0317 |
| 16703478 | MASTL        | microtubule associated serine/threonine kinase-like            | -0.4933 | 0.0122 |
| 16703752 | LOC100653181 | uncharacterized LOC100653181                                   | -0.5869 | 0.0013 |
| 16703891 | CCNY         | cyclin Y                                                       | -0.239  | 0.0213 |
| 16704051 |              |                                                                | -0.5995 | 0.0014 |
| 16704055 | HSD17B7P2    | hydroxysteroid (17-beta) dehydrogenase 7 pseudogene 2          | -0.8679 | 0.0096 |
| 16704090 |              |                                                                | -0.1925 | 0.0079 |
| 16704182 | CSGALNACT2   | chondroitin sulfate N-acetylgalactosaminyltransferase 2        | -0.3368 | 0.0244 |
| 16704770 |              |                                                                | -0.8439 | 0.0043 |
| 16704844 | TIMM23       | translocase of inner mitochondrial membrane 23 homolog (yeast) | -0.5036 | 0.0044 |
| 16704894 | LOC728407    | poly (ADP-ribose) glycohydrolase pseudogene                    | -0.3254 | 0.0166 |
| 16705159 | CDK1         | cyclin-dependent kinase 1                                      | -0.8436 | 0.0066 |
| 16705450 | DDX50        | DEAD (Asp-Glu-Ala-Asp) box polypeptide 50                      | -0.3509 | 0.0134 |
| 16705474 | DDX21        | DEAD (Asp-Glu-Ala-Asp) box helicase 21                         | -0.356  | 0.0078 |
| 16705620 | TSPAN15      | tetraspanin 15                                                 | -0.2687 | 0.0401 |
| 16706023 | FAM149B1     | family with sequence similarity 149, member B1                 | -0.2919 | 0.0082 |
| 16706117 | FUT11        | fucosyltransferase 11 (alpha (1,3) fucosyltransferase)         | -0.4657 | 0.0233 |
| 16706461 | MIR548AK     | microRNA 548ak                                                 | -0.5619 | 0.004  |
| 16706522 | SFTPA1       | surfactant protein A1                                          | -0.2481 | 0.0171 |
| 16706562 | LOC642361    | uncharacterized LOC642361                                      | -0.3137 | 0.0202 |
| 16706706 |              |                                                                | -0.3207 | 0.0095 |
| 16706830 |              |                                                                | -0.5661 | 0.0094 |
| 16706968 | FAM22D       | family with sequence similarity 22, member D                   | -0.192  | 0.0286 |
| 16707221 | KIF20B       | kinesin family member 20B                                      | -0.5525 | 0.0474 |
| 16707468 | KIF11        | kinesin family member 11                                       | -0.9661 | 0.0044 |
| 16707551 | CEP55        | centrosomal protein 55kDa                                      | -0.669  | 0.0051 |
| 16707695 | HELLS        | helicase, lymphoid-specific                                    | -1.0239 | 0.0014 |
| 16707927 | RPL13AP5     | ribosomal protein L13a pseudogene 5                            | -0.1783 | 0.0212 |

|          |              |                                                                         |         |        |
|----------|--------------|-------------------------------------------------------------------------|---------|--------|
| 16707949 | C10orf12     | chromosome 10 open reading frame 12                                     | -0.4097 | 0.0177 |
| 16708238 |              |                                                                         | -0.3329 | 0.0314 |
| 16708249 | SCD          | stearoyl-CoA desaturase (delta-9-desaturase)                            | -1.1573 | 0.0089 |
| 16708260 | LINC00263    | long intergenic non-protein coding RNA 263                              | -0.4194 | 0.022  |
| 16708370 | C10orf2      | chromosome 10 open reading frame 2                                      | -0.3152 | 0.0392 |
| 16708419 | KAZALD1      | Kazal-type serine peptidase inhibitor domain 1                          | -0.2771 | 0.0357 |
| 16708513 |              |                                                                         | -0.3518 | 0.0139 |
| 16708533 | PPRC1        | peroxisome proliferator-activated receptor gamma, coactivator-related 1 | -0.3738 | 0.0036 |
| 16708815 | PDCD11       | programmed cell death 11                                                | -0.2634 | 0.0412 |
| 16709068 |              |                                                                         | -0.3886 | 0.0039 |
| 16709128 | DUSP5        | dual specificity phosphatase 5                                          | -0.5572 | 0.0124 |
| 16709333 | TCF7L2       | transcription factor 7-like 2 (T-cell specific, HMG-box)                | -0.4493 | 0.0082 |
| 16709673 | PNLIPRP2     | pancreatic lipase-related protein 2                                     | -0.267  | 0.038  |
| 16709822 | GRK5         | G protein-coupled receptor kinase 5                                     | -0.6003 | 0.032  |
| 16710017 |              |                                                                         | -0.4257 | 0.0062 |
| 16710271 | BUB3         | budding uninhibited by benzimidazoles 3 homolog (yeast)                 | -0.4715 | 0.0256 |
| 16710360 | ZRANB1       | zinc finger, RAN-binding domain containing 1                            | -0.4566 | 0.0179 |
| 16710585 |              |                                                                         | -0.3676 | 0.0149 |
| 16711023 | TUBB8        | tubulin, beta 8 class VIII                                              | -0.3449 | 0.0006 |
| 16711089 | LARP4B       | La ribonucleoprotein domain family, member 4B                           | -0.3233 | 0.0322 |
| 16711118 | IDI2         | isopentenyl-diphosphate delta isomerase 2                               | -0.3659 | 0.0165 |
| 16711125 | IDI1         | isopentenyl-diphosphate delta isomerase 1                               | -0.8815 | 0.0103 |
| 16711138 |              |                                                                         | -0.7352 | 0.0179 |
| 16711450 |              |                                                                         | -0.5205 | 0.0042 |
| 16711520 |              |                                                                         | -0.2164 | 0.0352 |
| 16712605 |              |                                                                         | -0.2567 | 0.0341 |
| 16712703 | YME1L1       | YME1-like 1 (S. cerevisiae)                                             | -0.3285 | 0.0143 |
| 16712960 | MTPAP        | mitochondrial poly(A) polymerase                                        | -0.2665 | 0.0414 |
| 16713011 |              |                                                                         | -0.1969 | 0.0061 |
| 16713057 | ARHGAP12     | Rho GTPase activating protein 12                                        | -0.5849 | 0.0028 |
| 16713230 | PARD3        | par-3 partitioning defective 3 homolog (C. elegans)                     | -0.5992 | 0.0029 |
| 16713364 | SEPT7L       | septin 7-like                                                           | -0.2424 | 0.0195 |
| 16713674 | PARG         | poly (ADP-ribose) glycohydrolase                                        | -0.3598 | 0.0272 |
| 16714081 |              |                                                                         | -0.716  | 0.0067 |
| 16714086 | VSTM4        | V-set and transmembrane domain containing 4                             | -1.2516 | 0.006  |
| 16714343 |              |                                                                         | -0.3794 | 0.0177 |
| 16714842 |              |                                                                         | -0.181  | 0.0036 |
| 16715088 | AIFM2        | apoptosis-inducing factor, mitochondrion-associated, 2                  | -0.4606 | 0.024  |
| 16715112 | SAR1A        | SAR1 homolog A (S. cerevisiae)                                          | -0.1846 | 0.0445 |
| 16715216 |              |                                                                         | -0.1828 | 0.0067 |
| 16715389 |              |                                                                         | -0.4309 | 0.0062 |
| 16715409 | DNAJC9       | DnaJ (Hsp40) homolog, subfamily C, member 9                             | -0.3563 | 0.0025 |
| 16715611 | BMS1P4       | BMS1 pseudogene 4                                                       | -0.5152 | 0.0253 |
| 16715631 | LOC100653003 | uncharacterized LOC100653003                                            | -0.5906 | 0.0079 |
| 16715791 |              |                                                                         | -0.1333 | 0.0297 |
| 16716117 |              |                                                                         | -0.1465 | 0.0456 |
| 16716374 | LIPA         | lipase A, lysosomal acid, cholesterol esterase                          | -0.5983 | 0.0045 |
| 16716795 | SORBS1       | sorbin and SH3 domain containing 1                                      | -0.4848 | 0.0138 |
| 16717150 |              |                                                                         | -0.169  | 0.0053 |
| 16717235 | AVPI1        | arginine vasopressin-induced 1                                          | -0.5973 | 0.0063 |
| 16717557 |              |                                                                         | -1.3711 | 0.0038 |
| 16717676 |              |                                                                         | -0.3626 | 0.0294 |
| 16717750 |              |                                                                         | -0.1916 | 0.0161 |
| 16717775 | NPM3         | nucleophosmin/nucleoplasmin 3                                           | -0.419  | 0.0255 |
| 16718370 | SMNDC1       | survival motor neuron domain containing 1                               | -0.2801 | 0.0373 |
| 16718376 |              |                                                                         | -0.6336 | 0.0162 |
| 16718377 |              |                                                                         | -0.4447 | 0.0436 |
| 16718493 |              |                                                                         | -0.4161 | 0.0053 |
| 16718935 |              |                                                                         | -0.3172 | 0.0105 |

|          |              |                                                                        |         |        |
|----------|--------------|------------------------------------------------------------------------|---------|--------|
| 16719217 | CHST15       | carbohydrate (N-acetylgalactosamine 4-sulfate 6-O) sulfotransferase 15 | -0.4619 | 0.0019 |
| 16719272 | METTL10      | methyltransferase like 10                                              | -0.3033 | 0.0029 |
| 16719393 | DHX32        | DEAH (Asp-Glu-Ala-His) box polypeptide 32                              | -0.535  | 0.0246 |
| 16719411 |              |                                                                        | -0.4086 | 0.0115 |
| 16719417 | ADAM12       | ADAM metalloproteinase domain 12                                       | -0.39   | 0.0339 |
| 16719515 | MKI67        | antigen identified by monoclonal antibody Ki-67                        | -0.9293 | 0.0046 |
| 16719949 |              |                                                                        | -0.1192 | 0.0493 |
| 16719976 | RIC8A        | resistance to inhibitors of cholinesterase 8 homolog A (C. elegans)    | -0.169  | 0.0379 |
| 16720820 | MRPL23       | mitochondrial ribosomal protein L23                                    | -0.3081 | 0.0045 |
| 16720984 |              |                                                                        | -0.2513 | 0.0323 |
| 16720987 | LOC100505870 | uncharacterized LOC100505870                                           | -0.3964 | 0.0235 |
| 16721126 | RRM1         | ribonucleotide reductase M1                                            | -0.5958 | 0.0007 |
| 16721659 | EIF3F        | eukaryotic translation initiation factor 3, subunit F                  | -0.3171 | 0.0206 |
| 16721666 |              |                                                                        | -0.5601 | 0.0164 |
| 16721667 |              |                                                                        | -0.4813 | 0.0087 |
| 16721670 |              |                                                                        | -0.4502 | 0.016  |
| 16721673 |              |                                                                        | -0.6271 | 0.0018 |
| 16721674 |              |                                                                        | -0.4459 | 0.0276 |
| 16721676 |              |                                                                        | -0.4346 | 0.0214 |
| 16721681 |              |                                                                        | -0.3528 | 0.041  |
| 16721715 | RPL27A       | ribosomal protein L27a                                                 | -0.2126 | 0.0198 |
| 16721835 | WEE1         | WEE1 homolog (S. pombe)                                                | -0.5112 | 0.0213 |
| 16721884 | SBF2-AS1     | SBF2 antisense RNA 1 (non-protein coding)                              | -0.3354 | 0.0063 |
| 16722075 |              |                                                                        | -0.2866 | 0.0103 |
| 16722212 |              |                                                                        | -0.3664 | 0.0391 |
| 16722217 | ARNTL        | aryl hydrocarbon receptor nuclear translocator-like                    | -0.6588 | 0.0008 |
| 16722394 |              |                                                                        | -0.879  | 0.0038 |
| 16722455 |              |                                                                        | -0.8794 | 0.0138 |
| 16722562 | SAA1         | serum amyloid A1                                                       | -1.12   | 0.0231 |
| 16722603 | LDHA         | lactate dehydrogenase A                                                | -0.5877 | 0.0057 |
| 16722787 | HTATIP2      | HIV-1 Tat interactive protein 2, 30kDa                                 | -0.5331 | 0.0144 |
| 16722799 | PRMT3        | protein arginine methyltransferase 3                                   | -0.3104 | 0.013  |
| 16723100 | MIR610       | microRNA 610                                                           | -0.2999 | 0.0275 |
| 16723294 | EIF3M        | eukaryotic translation initiation factor 3, subunit M                  | -0.502  | 0.0003 |
| 16723507 | NAT10        | N-acetyltransferase 10 (GCN5-related)                                  | -0.3837 | 0.0102 |
| 16723593 | PDHX         | pyruvate dehydrogenase complex, component X                            | -0.3948 | 0.0083 |
| 16723903 | HSD17B12     | hydroxysteroid (17-beta) dehydrogenase 12                              | -0.1911 | 0.0158 |
| 16724162 |              |                                                                        | -0.3252 | 0.0469 |
| 16724194 | CRY2         | cryptochrome 2 (photolyase-like)                                       | -0.4979 | 0.0032 |
| 16724663 | MIR3161      | microRNA 3161                                                          | -0.3215 | 0.0411 |
| 16724849 | SMTNL1       | smoothelin-like 1                                                      | -0.1916 | 0.0184 |
| 16724901 | ZDHC5        | zinc finger, DHHC-type containing 5                                    | -0.2999 | 0.0105 |
| 16725041 | FAM111B      | family with sequence similarity 111, member B                          | -0.6596 | 0.0308 |
| 16725556 | DAK          | dihydroxyacetone kinase 2 homolog (S. cerevisiae)                      | -0.1935 | 0.0228 |
| 16725617 |              |                                                                        | -0.4994 | 0.0023 |
| 16725735 | FEN1         | flap structure-specific endonuclease 1                                 | -0.554  | 0.0021 |
| 16725742 | FADS2        | fatty acid desaturase 2                                                | -0.7058 | 0.0013 |
| 16725901 | METTL12      | methyltransferase like 12                                              | -0.2981 | 0.0309 |
| 16725910 | C11orf83     | chromosome 11 open reading frame 83                                    | -0.3278 | 0.0333 |
| 16725935 | POLR2G       | polymerase (RNA) II (DNA directed) polypeptide G                       | -0.3565 | 0.02   |
| 16725969 | TMEM179B     | transmembrane protein 179B                                             | -0.3045 | 0.0451 |
| 16725980 |              |                                                                        | -0.3507 | 0.0157 |
| 16726372 | GPR137       | G protein-coupled receptor 137                                         | -0.2245 | 0.0351 |
| 16726572 | PPP2R5B      | protein phosphatase 2, regulatory subunit B', beta                     | -0.2921 | 0.0049 |
| 16726707 | MRPL49       | mitochondrial ribosomal protein L49                                    | -0.3684 | 0.0113 |
| 16726977 | PCNXL3       | pecanex-like 3 (Drosophila)                                            | -0.4489 | 0.0125 |
| 16727194 | SART1        | squamous cell carcinoma antigen recognized by T cells                  | -0.2177 | 0.0394 |
| 16727204 |              |                                                                        | -0.5926 | 0.0217 |
| 16727222 |              |                                                                        | -0.214  | 0.0397 |

|          |           |                                                                                    |         |        |
|----------|-----------|------------------------------------------------------------------------------------|---------|--------|
| 16727224 | BANF1     | barrier to autointegration factor 1                                                | -0.2104 | 0.0147 |
| 16727277 | PACS1     | phosphofurin acidic cluster sorting protein 1                                      | -0.3083 | 0.0356 |
| 16727322 |           |                                                                                    | -0.3842 | 0.0263 |
| 16727596 | RCE1      | RCE1 homolog, prenyl protein protease ( <i>S. cerevisiae</i> )                     | -0.4513 | 0.0303 |
| 16727659 | KDM2A     | lysine (K)-specific demethylase 2A                                                 | -0.3213 | 0.0181 |
| 16727702 | ADRBK1    | adrenergic, beta, receptor kinase 1                                                | -0.3204 | 0.0086 |
| 16727802 | RAD9A     | RAD9 homolog A ( <i>S. pombe</i> )                                                 | -0.2883 | 0.0018 |
| 16728652 | INPPL1    | inositol polyphosphate phosphatase-like 1                                          | -0.4801 | 0.0009 |
| 16728711 |           |                                                                                    | -0.6603 | 0.0284 |
| 16728886 |           |                                                                                    | -0.3902 | 0.0166 |
| 16729021 |           |                                                                                    | -0.5388 | 0.0015 |
| 16729103 | RPS3      | ribosomal protein S3                                                               | -0.3156 | 0.0333 |
| 16729188 | UVRAG     | UV radiation resistance associated gene                                            | -0.3725 | 0.0098 |
| 16729444 | C11orf67  | chromosome 11 open reading frame 67                                                | -0.5787 | 0.0042 |
| 16729548 | RPS28     | ribosomal protein S28                                                              | -0.2439 | 0.0082 |
| 16729611 | ANKRD42   | ankyrin repeat domain 42                                                           | -0.3235 | 0.0377 |
| 16729838 |           |                                                                                    | -1.1242 | 0.0014 |
| 16730061 | KIAA1731  | KIAA1731                                                                           | -0.3767 | 0.0163 |
| 16730102 |           |                                                                                    | -0.4729 | 0.0277 |
| 16730340 | CEP57     | centrosomal protein 57kDa                                                          | -0.4256 | 0.0183 |
| 16730996 | FDX1      | ferredoxin 1                                                                       | -0.9575 | 0.0001 |
| 16731169 | DLAT      | dihydroliipoamide S-acetyltransferase                                              | -0.3513 | 0.0298 |
| 16731253 | PTS       | 6-pyruvoyltetrahydropterin synthase                                                | -0.5009 | 0.0193 |
| 16731490 |           |                                                                                    | -0.4696 | 0.0187 |
| 16731526 |           |                                                                                    | -0.9302 | 0.007  |
| 16731565 |           |                                                                                    | -0.3275 | 0.0381 |
| 16731693 | BACE1-AS  | BACE1 antisense RNA (non-protein coding)                                           | -0.376  | 0.0298 |
| 16732067 | CCDC84    | coiled-coil domain containing 84                                                   | -0.4621 | 0.0177 |
| 16732088 | TRAPPC4   | trafficking protein particle complex 4                                             | -0.3288 | 0.0252 |
| 16732419 | TMEM136   | transmembrane protein 136                                                          | -0.5746 | 0.0151 |
| 16732520 | TBCEL     | tubulin folding cofactor E-like                                                    | -0.4394 | 0.0169 |
| 16732569 | SC5DL     | sterol-C5-desaturase (ERG3 delta-5-desaturase homolog, <i>S. cerevisiae</i> )-like | -0.6737 | 0.012  |
| 16732734 | LOC341056 | SUMO1 activating enzyme subunit 1 pseudogene                                       | -0.1935 | 0.0274 |
| 16733104 | CHEK1     | checkpoint kinase 1                                                                | -0.5324 | 0.0363 |
| 16733260 |           |                                                                                    | -0.6873 | 0.0023 |
| 16733262 | TIRAP     | toll-interleukin 1 receptor (TIR) domain containing adaptor protein                | -0.183  | 0.0473 |
| 16733288 | ST3GAL4   | ST3 beta-galactoside alpha-2,3-sialyltransferase 4                                 | -0.4915 | 0.0002 |
| 16733397 | KCNJ5     | potassium inwardly-rectifying channel, subfamily J, member 5                       | -0.5762 | 0.025  |
| 16733407 |           |                                                                                    | -0.8013 | 0.0022 |
| 16733759 | LOC283177 | uncharacterized LOC283177                                                          | -0.16   | 0.0419 |
| 16734044 | DEAF1     | deformed epidermal autoregulatory factor 1 ( <i>Drosophila</i> )                   | -0.2976 | 0.036  |
| 16734154 | POLR2L    | polymerase (RNA) II (DNA directed) polypeptide L, 7.6kDa                           | -0.3015 | 0.0255 |
| 16734299 | FAM99B    | family with sequence similarity 99, member B (non-protein coding)                  | -0.1491 | 0.0491 |
| 16734467 | KCNQ1OT1  | KCNQ1 opposite strand/antisense transcript 1 (non-protein coding)                  | -0.4008 | 0.0325 |
| 16734494 | NAP1L4    | nucleosome assembly protein 1-like 4                                               | -0.3815 | 0.0018 |
| 16734755 | RRM1-AS1  | RRM1 antisense RNA 1 (non-protein coding)                                          | -1.0067 | 0.004  |
| 16734840 | HBB       | hemoglobin, beta                                                                   | -0.3505 | 0.0272 |
| 16735121 | RRP8      | ribosomal RNA processing 8, methyltransferase, homolog (yeast)                     | -0.2186 | 0.0139 |
| 16735405 | TRIM66    | tripartite motif containing 66                                                     | -0.2342 | 0.0301 |
| 16735596 | DENND5A   | DENN/MADD domain containing 5A                                                     | -0.3647 | 0.0238 |
| 16735639 | TMEM41B   | transmembrane protein 41B                                                          | -0.5199 | 0.0099 |
| 16735658 |           |                                                                                    | -0.195  | 0.021  |
| 16735669 | SBF2      | SET binding factor 2                                                               | -0.2949 | 0.0388 |
| 16735727 | RNU7-28P  | RNA, U7 small nuclear 28 pseudogene                                                | -0.4474 | 0.024  |

|          |         |                                                                                         |         |        |
|----------|---------|-----------------------------------------------------------------------------------------|---------|--------|
| 16735751 | LYVE1   | lymphatic vessel endothelial hyaluronan receptor 1                                      | -1.4077 | 0.0002 |
| 16735807 |         |                                                                                         | -0.9815 | 0.02   |
| 16735873 | GALNTL4 | UDP-N-acetyl-alpha-D-galactosamine:polypeptide N-acetylgalactosaminyltransferase-like 4 | -0.4241 | 0.0111 |
| 16735933 |         |                                                                                         | -0.2773 | 0.0224 |
| 16735994 | RRAS2   | related RAS viral (r-ras) oncogene homolog 2                                            | -0.4595 | 0.0026 |
| 16736049 | PSMA1   | proteasome (prosome, macropain) subunit, alpha type, 1                                  | -0.2308 | 0.0448 |
| 16736211 | RPS13   | ribosomal protein S13                                                                   | -0.3133 | 0.0026 |
| 16736214 |         |                                                                                         | -0.3336 | 0.0026 |
| 16736215 |         |                                                                                         | -0.3274 | 0.0065 |
| 16736216 |         |                                                                                         | -0.5254 | 0.0293 |
| 16736217 |         |                                                                                         | -0.3671 | 0.002  |
| 16736219 |         |                                                                                         | -0.3265 | 0.046  |
| 16736222 |         |                                                                                         | -0.3463 | 0.0026 |
| 16736508 | TSG101  | tumor susceptibility gene 101                                                           | -0.25   | 0.0146 |
| 16736526 |         |                                                                                         | -0.1279 | 0.0495 |
| 16736551 |         |                                                                                         | -0.42   | 0.0367 |
| 16736638 | E2F8    | E2F transcription factor 8                                                              | -0.3104 | 0.0434 |
| 16736696 | RN5S336 | RNA, 5S ribosomal 336                                                                   | -0.252  | 0.0392 |
| 16736821 | LGR4    | leucine-rich repeat containing G protein-coupled receptor 4                             | -0.843  | 0.002  |
| 16736847 | LIN7C   | lin-7 homolog C (C. elegans)                                                            | -0.2591 | 0.04   |
| 16736891 | KIF18A  | kinesin family member 18A                                                               | -0.7378 | 0.0172 |
| 16737123 | CCDC73  | coiled-coil domain containing 73                                                        | -0.1385 | 0.0253 |
| 16737614 | CHST1   | carbohydrate (keratan sulfate Gal-6) sulfotransferase 1                                 | -0.6784 | 0.0241 |
| 16737645 | PEX16   | peroxisomal biogenesis factor 16                                                        | -0.2532 | 0.0149 |
| 16737669 | PHF21A  | PHD finger protein 21A                                                                  | -0.354  | 0.0187 |
| 16737717 | AMBRA1  | autophagy/beclin-1 regulator 1                                                          | -0.567  | 0.0011 |
| 16737783 | CKAP5   | cytoskeleton associated protein 5                                                       | -0.2283 | 0.033  |
| 16737946 | ACP2    | acid phosphatase 2, lysosomal                                                           | -0.452  | 0.004  |
| 16738023 | PSMC3   | proteasome (prosome, macropain) 26S subunit, ATPase, 3                                  | -0.3755 | 0.0187 |
| 16738205 | NUP160  | nucleoporin 160kDa                                                                      | -0.5484 | 0.0053 |
| 16738393 | OR5M1   | olfactory receptor, family 5, subfamily M, member 1                                     | -0.3186 | 0.0326 |
| 16738583 | BTBD18  | BTB (POZ) domain containing 18                                                          | -0.3417 | 0.0059 |
| 16738736 | PATL1   | protein associated with topoisomerase II homolog 1 (yeast)                              | -0.3329 | 0.0342 |
| 16739054 | CPSF7   | cleavage and polyadenylation specific factor 7, 59kDa                                   | -0.444  | 0.0025 |
| 16739132 | FADS1   | fatty acid desaturase 1                                                                 | -0.9502 | 0.0004 |
| 16739229 |         |                                                                                         | -0.5239 | 0      |
| 16739253 |         |                                                                                         | -0.1814 | 0.0141 |
| 16739295 | TUT1    | terminal uridylyl transferase 1, U6 snRNA-specific                                      | -0.2471 | 0.012  |
| 16739315 |         |                                                                                         | -0.2528 | 0.0292 |
| 16739636 | SNHG1   | small nucleolar RNA host gene 1 (non-protein coding)                                    | -0.3209 | 0.0341 |
| 16740037 | MAP4K2  | mitogen-activated protein kinase kinase kinase 2                                        | -0.3628 | 0.0059 |
| 16740074 | MEN1    | multiple endocrine neoplasia 1                                                          | -0.3149 | 0.0444 |
| 16740326 | FAU     | Finkel-Biskis-Reilly murine sarcoma virus (FBR-MuSV) ubiquitously expressed             | -0.2504 | 0.0015 |
| 16740328 |         |                                                                                         | -0.3151 | 0.0092 |
| 16740330 |         |                                                                                         | -0.5655 | 0.0415 |
| 16740333 |         |                                                                                         | -0.3871 | 0.0002 |
| 16740334 |         |                                                                                         | -0.4081 | 0.0077 |
| 16740339 |         |                                                                                         | -0.5534 | 0.0043 |
| 16740340 |         |                                                                                         | -0.7986 | 0.0004 |
| 16740608 | FIBP    | fibroblast growth factor (acidic) intracellular binding protein                         | -0.2679 | 0.0333 |
| 16740630 | FOSL1   | FOS-like antigen 1                                                                      | -0.5851 | 0.0023 |
| 16740707 | YIF1A   | Yip1 interacting factor homolog A (S. cerevisiae)                                       | -0.3613 | 0.0387 |
| 16740994 |         |                                                                                         | -0.4097 | 0.0112 |
| 16741023 | TMEM134 | transmembrane protein 134                                                               | -0.335  | 0.0007 |

|          |              |                                                                              |         |        |
|----------|--------------|------------------------------------------------------------------------------|---------|--------|
| 16741040 | PITPNM1      | phosphatidylinositol transfer protein, membrane-associated 1                 | -0.2841 | 0.0057 |
| 16741196 |              |                                                                              | -0.2205 | 0.0487 |
| 16741201 | CHKA         | choline kinase alpha                                                         | -0.6092 | 0.0005 |
| 16741287 | CPT1A        | carnitine palmitoyltransferase 1A (liver)                                    | -0.674  | 0.0078 |
| 16741501 | DHCR7        | 7-dehydrocholesterol reductase                                               | -0.8937 | 0.0081 |
| 16741643 | LAMTOR1      | late endosomal/lysosomal adaptor, MAPK and MTOR activator 1                  | -0.2487 | 0.0441 |
| 16741725 | PDE2A        | phosphodiesterase 2A, cGMP-stimulated                                        | -1.0138 | 0.0229 |
| 16741911 |              |                                                                              | -0.1756 | 0.0138 |
| 16741948 | CHCHD8       | coiled-coil-helix-coiled-coil-helix domain containing 8                      | -0.3918 | 0.002  |
| 16742084 |              |                                                                              | -0.5063 | 0.0277 |
| 16742148 |              |                                                                              | -0.1631 | 0.0387 |
| 16742337 |              |                                                                              | -0.1952 | 0.0212 |
| 16742520 | RSF1         | remodeling and spacing factor 1                                              | -0.4026 | 0.0105 |
| 16742544 | RSF1-IT2     | RSF1 intronic transcript 2 (non-protein coding)                              | -0.3726 | 0.0155 |
| 16742550 | C11orf67     | chromosome 11 open reading frame 67                                          | -0.4553 | 0.0089 |
| 16742553 |              |                                                                              | -0.3265 | 0.0306 |
| 16742556 | INTS4        | integrator complex subunit 4                                                 | -0.4601 | 0.0011 |
| 16742638 | KCTD21       | potassium channel tetramerisation domain containing 21                       | -0.3353 | 0.0063 |
| 16742647 | GAB2         | GRB2-associated binding protein 2                                            | -0.3285 | 0.0233 |
| 16742814 | RAB30        | RAB30, member RAS oncogene family                                            | -0.518  | 0.0124 |
| 16742849 |              |                                                                              | -0.3564 | 0.0036 |
| 16742945 | CREBZF       | CREB/ATF bZIP transcription factor                                           | -0.3744 | 0.0001 |
| 16742959 | CCDC89       | coiled-coil domain containing 89                                             | -0.4779 | 0.0315 |
| 16742963 | SYTL2        | synaptotagmin-like 2                                                         | -1.2834 | 0.0058 |
| 16743293 |              |                                                                              | -0.4741 | 0.0334 |
| 16743296 | TAF1D        | TATA box binding protein (TBP)-associated factor, RNA polymerase I, D, 41kDa | -0.3923 | 0.0083 |
| 16743322 | SNORA8       | small nucleolar RNA, H/ACA box 8                                             | -0.2941 | 0.047  |
| 16743328 | TAF1D        | TATA box binding protein (TBP)-associated factor, RNA polymerase I, D, 41kDa | -0.4519 | 0.0026 |
| 16743338 | TAF1D        | TATA box binding protein (TBP)-associated factor, RNA polymerase I, D, 41kDa | -0.5184 | 0.0177 |
| 16743340 | SNORD6       | small nucleolar RNA, C/D box 6                                               | -0.4203 | 0.0132 |
| 16743342 | TAF1D        | TATA box binding protein (TBP)-associated factor, RNA polymerase I, D, 41kDa | -0.6618 | 0.0004 |
| 16743577 | PGR          | progesterone receptor                                                        | -0.9871 | 0.0069 |
| 16743751 | MMP12        | matrix metalloproteinase 12 (macrophage elastase)                            | -0.8486 | 0.001  |
| 16743779 | DCUN1D5      | DCN1, defective in cullin neddylation 1, domain containing 5 (S. cerevisiae) | -0.4223 | 0.0439 |
| 16744078 | NPAT         | nuclear protein, ataxia-telangiectasia locus                                 | -0.354  | 0.0448 |
| 16744408 | TIMM8B       | translocase of inner mitochondrial membrane 8 homolog B (yeast)              | -0.3369 | 0.0452 |
| 16744616 | CADM1        | cell adhesion molecule 1                                                     | -0.6882 | 0.0105 |
| 16744774 | LOC100652768 | uncharacterized LOC100652768                                                 | -0.2309 | 0.02   |
| 16744822 | BACE1        | beta-site APP-cleaving enzyme 1                                              | -0.8023 | 0.0007 |
| 16744844 |              |                                                                              | -0.1344 | 0.0468 |
| 16745144 | RPL23AP64    | ribosomal protein L23a pseudogene 64                                         | -0.3521 | 0.0416 |
| 16745148 | RPS25        | ribosomal protein S25                                                        | -0.4658 | 0.0022 |
| 16745154 |              |                                                                              | -0.7478 | 0.0028 |
| 16745236 | H2AFX        | H2A histone family, member X                                                 | -0.3368 | 0.0078 |
| 16745956 | FLJ39051     | uncharacterized LOC399972                                                    | -0.2565 | 0.0251 |
| 16746045 | TP53AIP1     | tumor protein p53 regulated apoptosis inducing protein 1                     | -0.1934 | 0.0257 |
| 16746057 | ARHGAP32     | Rho GTPase activating protein 32                                             | -0.6505 | 0.0042 |
| 16746142 | PRDM10       | PR domain containing 10                                                      | -0.1844 | 0.0342 |
| 16746379 | NCAPD3       | non-SMC condensin II complex, subunit D3                                     | -0.4923 | 0.0005 |
| 16747287 | NCAPD2       | non-SMC condensin I complex, subunit D2                                      | -0.4345 | 0.0245 |
| 16747439 | GPR162       | G protein-coupled receptor 162                                               | -0.4931 | 0.0122 |
| 16747865 | NANOGP1      | Nanog homeobox pseudogene 1                                                  | -0.3127 | 0.0333 |



|          |              |                                                                                                   |         |        |
|----------|--------------|---------------------------------------------------------------------------------------------------|---------|--------|
| 16747907 | ZNF705A      | zinc finger protein 705A                                                                          | -0.2271 | 0.0072 |
| 16748391 |              |                                                                                                   | -0.3815 | 0.042  |
| 16748496 |              |                                                                                                   | -0.7149 | 0.0153 |
| 16748989 | PDE3A        | phosphodiesterase 3A, cGMP-inhibited                                                              | -0.5937 | 0.0273 |
| 16749524 | KLHDC5       | kelch domain containing 5                                                                         | -0.236  | 0.0129 |
| 16749653 |              |                                                                                                   | -0.126  | 0.0215 |
| 16750761 | TROAP        | trophinin associated protein (tastin)                                                             | -0.363  | 0.0237 |
| 16750963 | AQP2         | aquaporin 2 (collecting duct)                                                                     | -0.5828 | 0.0451 |
| 16750996 | ASIC1        | acid-sensing (proton-gated) ion channel 1                                                         | -0.1564 | 0.0077 |
| 16751020 | SMARCD1      | SWI/SNF related, matrix associated, actin dependent regulator of chromatin, subfamily d, member 1 | -0.4099 | 0.0193 |
| 16751116 | DIP2B        | DIP2 disco-interacting protein 2 homolog B (Drosophila)                                           | -0.4719 | 0.0045 |
| 16751161 |              |                                                                                                   | -0.4865 | 0.0281 |
| 16751709 | ESPL1        | extra spindle pole bodies homolog 1 (S. cerevisiae)                                               | -0.5652 | 0.0007 |
| 16751881 | LOC100652999 | uncharacterized LOC100652999                                                                      | -0.278  | 0.0285 |
| 16751997 |              |                                                                                                   | -0.6244 | 0.0035 |
| 16752009 |              |                                                                                                   | -0.5836 | 0.0083 |
| 16752217 | GDF11        | growth differentiation factor 11                                                                  | -0.4115 | 0.0438 |
| 16752242 |              |                                                                                                   | -0.2831 | 0.0297 |
| 16752244 | DGKA         | diacylglycerol kinase, alpha 80kDa                                                                | -0.3844 | 0.0116 |
| 16752389 | RPS26        | ribosomal protein S26                                                                             | -0.579  | 0.0114 |
| 16752652 | SPRYD4       | SPRY domain containing 4                                                                          | -0.4923 | 0.0016 |
| 16752834 | SHMT2        | serine hydroxymethyltransferase 2 (mitochondrial)                                                 | -0.4093 | 0.015  |
| 16753228 | XRCC6BP1     | XRCC6 binding protein 1                                                                           | -0.4613 | 0.0211 |
| 16753394 |              |                                                                                                   | -0.1517 | 0.0411 |
| 16753533 | RASSF3       | Ras association (RalGDS/AF-6) domain family member 3                                              | -0.5096 | 0.0178 |
| 16753943 | FRS2         | fibroblast growth factor receptor substrate 2                                                     | -0.5713 | 0.0049 |
| 16753964 | CCT2         | chaperonin containing TCP1, subunit 2 (beta)                                                      | -0.3761 | 0.0404 |
| 16754913 |              |                                                                                                   | -0.674  | 0.0245 |
| 16755312 | AMDHD1       | amidohydrolase domain containing 1                                                                | -0.973  | 0.0001 |
| 16755528 |              |                                                                                                   | -0.7635 | 0.023  |
| 16756202 | EID3         | EP300 interacting inhibitor of differentiation 3                                                  | -0.3071 | 0.0313 |
| 16756510 | WSCD2        | WSC domain containing 2                                                                           | -0.1578 | 0.0124 |
| 16757051 |              |                                                                                                   | -0.1707 | 0.005  |
| 16757098 | SH2B3        | SH2B adaptor protein 3                                                                            | -0.2132 | 0.0425 |
| 16757826 |              |                                                                                                   | -0.5335 | 0.0029 |
| 16758621 |              |                                                                                                   | -0.775  | 0.0091 |
| 16758872 |              |                                                                                                   | -0.5839 | 0.0157 |
| 16758885 | AACS         | acetoacetyl-CoA synthetase                                                                        | -0.3931 | 0.0386 |
| 16759202 | RAN          | RAN, member RAS oncogene family                                                                   | -0.3702 | 0.0129 |
| 16760048 | FOXM1        | forkhead box M1                                                                                   | -0.5865 | 0.0077 |
| 16760621 | CDCA3        | cell division cycle associated 3                                                                  | -0.7158 | 0.0015 |
| 16760868 | SLC2A3       | solute carrier family 2 (facilitated glucose transporter), member 3                               | -0.4522 | 0.0311 |
| 16760911 | LOC389634    | uncharacterized LOC389634                                                                         | -0.3176 | 0.0172 |
| 16761148 | DDX12P       | DEAD/H (Asp-Glu-Ala-Asp/His) box polypeptide 12, pseudogene                                       | -0.3168 | 0.0201 |
| 16761231 |              |                                                                                                   | -0.1877 | 0.0113 |
| 16761541 | PRB4         | proline-rich protein BstNI subfamily 4                                                            | -0.4426 | 0.0014 |
| 16761549 | PRB1         | proline-rich protein BstNI subfamily 1                                                            | -0.3669 | 0.05   |
| 16761776 |              |                                                                                                   | -0.5985 | 0.0292 |
| 16762337 | BCAT1        | branched chain amino-acid transaminase 1, cytosolic                                               | -0.8065 | 0.0279 |
| 16762642 | LOC100506578 | uncharacterized protein C12orf71-like                                                             | -0.4696 | 0.0012 |
| 16762692 | LOC100506606 | uncharacterized LOC100506606                                                                      | -0.3911 | 0.02   |
| 16763473 |              |                                                                                                   | -0.3074 | 0.0038 |
| 16763764 | VDR          | vitamin D (1,25- dihydroxyvitamin D3) receptor                                                    | -0.7992 | 0.0019 |
| 16763970 | CCNT1        | cyclin T1                                                                                         | -0.2758 | 0.0332 |
| 16764104 |              |                                                                                                   | -0.3738 | 0.0235 |
| 16764106 |              |                                                                                                   | -0.789  | 0.0086 |
| 16764328 |              |                                                                                                   | -0.1692 | 0.0048 |

|          |              |                                                                                     |         |        |
|----------|--------------|-------------------------------------------------------------------------------------|---------|--------|
| 16764334 |              |                                                                                     | -0.4115 | 0.0042 |
| 16764343 | C1QL4        | complement component 1, q subcomponent-like 4                                       | -0.3627 | 0.0155 |
| 16764433 | NCKAP5L      | NCK-associated protein 5-like                                                       | -0.3065 | 0.0107 |
| 16764498 |              |                                                                                     | -1.1384 | 0.0171 |
| 16765389 | ATP5G2       | ATP synthase, H+ transporting, mitochondrial Fo complex, subunit C2 (subunit 9)     | -0.1843 | 0.0206 |
| 16765446 | HOXC-AS5     | HOXC cluster antisense RNA 5 (non-protein coding)                                   | -0.1817 | 0.0499 |
| 16765697 | ITGA7        | integrin, alpha 7                                                                   | -0.4335 | 0.0016 |
| 16765809 | MMP19        | matrix metalloproteinase 19                                                         | -0.3068 | 0.0076 |
| 16765845 |              |                                                                                     | -1.0338 | 0.0014 |
| 16766185 | GLS2         | glutaminase 2 (liver, mitochondrial)                                                | -0.3076 | 0.0353 |
| 16766279 | SNORD59B     | small nucleolar RNA, C/D box 59B                                                    | -0.8425 | 0.0115 |
| 16766403 | TMEM194A     | transmembrane protein 194A                                                          | -0.5278 | 0.0142 |
| 16766767 | CTDSP2       | CTD (carboxy-terminal domain, RNA polymerase II, polypeptide A) small phosphatase 2 | -0.2726 | 0.0442 |
| 16766912 |              |                                                                                     | -0.6832 | 0.0147 |
| 16767420 |              |                                                                                     | -0.4924 | 0.0488 |
| 16768738 | NTN4         | netrin 4                                                                            | -0.5117 | 0.0188 |
| 16768755 |              |                                                                                     | -0.8593 | 0.0041 |
| 16768894 |              |                                                                                     | -0.1417 | 0.0464 |
| 16768905 |              |                                                                                     | -0.1383 | 0.0092 |
| 16769863 |              |                                                                                     | -0.907  | 0.0077 |
| 16770706 |              |                                                                                     | -0.1867 | 0.0205 |
| 16770709 |              |                                                                                     | -1.1274 | 0.0137 |
| 16771067 | CIT          | citron (rho-interacting, serine/threonine kinase 21)                                | -0.7977 | 0.001  |
| 16771499 |              |                                                                                     | -0.7437 | 0.0246 |
| 16771570 | RHOF         | ras homolog family member F (in filopodia)                                          | -0.5886 | 0.0137 |
| 16771571 |              |                                                                                     | -1.0321 | 0.0128 |
| 16771572 |              |                                                                                     | -1.2641 | 0.0057 |
| 16771574 |              |                                                                                     | -0.9058 | 0.0275 |
| 16772144 | SCARB1       | scavenger receptor class B, member 1                                                | -0.5968 | 0.0183 |
| 16772169 |              |                                                                                     | -0.3385 | 0.021  |
| 16772429 | LOC100190940 | uncharacterized LOC100190940                                                        | -0.1645 | 0.0193 |
| 16772452 |              |                                                                                     | -0.1039 | 0.0432 |
| 16772510 |              |                                                                                     | -0.504  | 0.0436 |
| 16772852 |              |                                                                                     | -0.1957 | 0.0246 |
| 16773043 | LATS2-AS1    | LATS2 antisense RNA 1 (non-protein coding)                                          | -0.4195 | 0.0198 |
| 16773080 | ZDHHC20-AS1  | ZDHHC20 antisense RNA 1 (non-protein coding)                                        | -0.4808 | 0.0317 |
| 16773348 | NUPL1        | nucleoporin like 1                                                                  | -0.329  | 0.0276 |
| 16773650 | USPL1        | ubiquitin specific peptidase like 1                                                 | -0.7355 | 0.0001 |
| 16773932 | STARD13-AS2  | STARD13 antisense RNA 2 (non-protein coding)                                        | -0.3611 | 0.0355 |
| 16774082 | EXOSC8       | exosome component 8                                                                 | -0.4206 | 0.0209 |
| 16774232 |              |                                                                                     | -0.2885 | 0.0429 |
| 16774303 | RGCC         | regulator of cell cycle                                                             | -0.4877 | 0.0284 |
| 16774762 | RNU6-60      | RNA, U6 small nuclear 60                                                            | -0.4803 | 0.0192 |
| 16774976 | WDFY2        | WD repeat and FYVE domain containing 2                                              | -0.5548 | 0.0018 |
| 16775014 | CKAP2        | cytoskeleton associated protein 2                                                   | -0.4814 | 0.036  |
| 16775421 | UCHL3        | ubiquitin carboxyl-terminal esterase L3 (ubiquitin thiolesterase)                   | -0.4039 | 0.0477 |
| 16775811 | GPC6         | glypican 6                                                                          | -0.6902 | 0.0338 |
| 16775968 | FARP1        | FERM, RhoGEF (ARHGEF) and pleckstrin domain protein 1 (chondrocyte-derived)         | -1.1904 | 0.0001 |
| 16776004 | MIR3170      | microRNA 3170                                                                       | -0.2404 | 0.0252 |
| 16776006 | FARP1-IT1    | FARP1 intronic transcript 1 (non-protein coding)                                    | -0.3467 | 0.0056 |
| 16776103 | ZIC2         | Zic family member 2                                                                 | -0.3017 | 0.0299 |
| 16776230 | LINC00283    | long intergenic non-protein coding RNA 283                                          | -0.1374 | 0.0364 |
| 16776335 | ABHD13       | abhydrolase domain containing 13                                                    | -0.2763 | 0.0373 |
| 16776339 | TNFSF13B     | tumor necrosis factor (ligand) superfamily, member 13b                              | -1.0873 | 0.0095 |
| 16776431 | COL4A2       | collagen, type IV, alpha 2                                                          | -0.8695 | 0.0005 |
| 16776491 |              |                                                                                     | -0.5306 | 0.0041 |
| 16776537 | ARHGEF7      | Rho guanine nucleotide exchange factor (GEF) 7                                      | -0.2016 | 0.0433 |

|          |               |                                                                                |         |        |
|----------|---------------|--------------------------------------------------------------------------------|---------|--------|
| 16777020 | MIR4502       | microRNA 4502                                                                  | -0.343  | 0.0294 |
| 16777115 |               |                                                                                | -0.4719 | 0.0117 |
| 16777259 | LATS2         | LATS, large tumor suppressor, homolog 2 (Drosophila)                           | -0.4525 | 0.0043 |
| 16777272 | RNU6-51       | RNA, U6 small nuclear 51                                                       | -0.4459 | 0.0362 |
| 16777274 | RNU4-9P       | RNA, U4 small nuclear 9, pseudogene                                            | -0.7401 | 0.0061 |
| 16777278 | SKA3          | spindle and kinetochore associated complex subunit 3                           | -0.5919 | 0.0418 |
| 16777309 | ZDHHC20       | zinc finger, DHHC-type containing 20                                           | -0.4236 | 0.0211 |
| 16777331 | ZDHHC20-IT1   | ZDHHC20 intronic transcript 1 (non-protein coding)                             | -0.23   | 0.0028 |
| 16777360 |               |                                                                                | -0.8822 | 0.0259 |
| 16777363 | LINC00424     | long intergenic non-protein coding RNA 424                                     | -0.2566 | 0.0095 |
| 16777712 | PAN3-AS1      | PAN3 antisense RNA 1 (non-protein coding)                                      | -0.284  | 0.0198 |
| 16777777 | SLC7A1        | solute carrier family 7 (cationic amino acid transporter, y+ system), member 1 | -1.2079 | 0.0012 |
| 16777998 | RNY1P4        | RNA, Ro-associated Y1 pseudogene 4                                             | -0.8335 | 0.0039 |
| 16778043 | STARD13-IT1   | STARD13 intronic transcript 1 (non-protein coding)                             | -0.3007 | 0.048  |
| 16778351 |               |                                                                                | -0.1162 | 0.0335 |
| 16778370 | LINC00548     | long intergenic non-protein coding RNA 548                                     | -0.1618 | 0.0428 |
| 16779232 | INTS6         | integrator complex subunit 6                                                   | -0.4269 | 0.0161 |
| 16779278 | RNY1P6        | RNA, Ro-associated Y1 pseudogene 6                                             | -0.6252 | 0.0189 |
| 16779546 | DIAPH3        | diaphanous homolog 3 (Drosophila)                                              | -0.8845 | 0.0054 |
| 16779958 | EDNRB         | endothelin receptor type B                                                     | -0.9017 | 0.0018 |
| 16779990 | POU4F1        | POU class 4 homeobox 1                                                         | -0.2619 | 0.017  |
| 16780069 | SPRY2         | sprouty homolog 2 (Drosophila)                                                 | -0.6343 | 0.0025 |
| 16780203 | GPC6-AS1      | GPC6 antisense RNA 1 (non-protein coding)                                      | -0.2795 | 0.0158 |
| 16780447 | RNF113B       | ring finger protein 113B                                                       | -0.5305 | 0.0001 |
| 16780453 | FARP1-AS1     | FARP1 antisense RNA 1 (non-protein coding)                                     | -1.0857 | 0.0001 |
| 16780611 | RNY3P6        | RNA, Ro-associated Y3 pseudogene 6                                             | -0.6334 | 0.003  |
| 16780929 | COL4A1        | collagen, type IV, alpha 1                                                     | -0.9424 | 0.0016 |
| 16780993 | COL4A2-AS1    | COL4A2 antisense RNA 1 (non-protein coding)                                    | -0.6779 | 0.0004 |
| 16781174 | LOC283501     | uncharacterized LOC283501                                                      | -0.146  | 0.0415 |
| 16781184 |               |                                                                                | -0.1176 | 0.0308 |
| 16781475 | OR11H4        | olfactory receptor, family 11, subfamily H, member 4                           | -0.1161 | 0.0181 |
| 16781482 | PARP2         | poly (ADP-ribose) polymerase 2                                                 | -0.692  | 0.0002 |
| 16781516 | APEX1         | APEX nuclease (multifunctional DNA repair enzyme) 1                            | -0.5505 | 0.0002 |
| 16781614 | METTL17       | methyltransferase like 17                                                      | -0.4644 | 0.0065 |
| 16781691 | RNASE8        | ribonuclease, RNase A family, 8                                                | -0.1724 | 0.0227 |
| 16781695 | ARHGEF40      | Rho guanine nucleotide exchange factor (GEF) 40                                | -0.6229 | 0      |
| 16781732 | C14orf176     | chromosome 14 open reading frame 176                                           | -0.4407 | 0.0022 |
| 16781750 |               |                                                                                | -0.4767 | 0.0002 |
| 16781791 | TOX4          | TOX high mobility group box family member 4                                    | -0.2875 | 0.0016 |
| 16782132 | ABHD4         | abhydrolase domain containing 4                                                | -0.6718 | 0.01   |
| 16782153 | OXA1L         | oxidase (cytochrome c) assembly 1-like                                         | -0.2917 | 0.0366 |
| 16782173 | MRPL52        | mitochondrial ribosomal protein L52                                            | -0.3189 | 0.0454 |
| 16782187 | MMP14         | matrix metalloproteinase 14 (membrane-inserted)                                | -0.7746 | 0.0092 |
| 16782255 | C14orf164     | chromosome 14 open reading frame 164                                           | -0.1535 | 0.0176 |
| 16782280 | BCL2L2-PABPN1 | BCL2L2-PABPN1 readthrough                                                      | -0.2953 | 0.0022 |
| 16782334 | NGDN          | neuroguidin, EIF4E binding protein                                             | -0.2616 | 0.0323 |
| 16782408 |               |                                                                                | -0.8198 | 0.0193 |
| 16782414 |               |                                                                                | -0.5953 | 0.0206 |
| 16782548 | PCK2          | phosphoenolpyruvate carboxykinase 2 (mitochondrial)                            | -0.6462 | 0.0065 |
| 16782576 | DCAF11        | DDB1 and CUL4 associated factor 11                                             | -0.6685 | 0.001  |
| 16782609 | FITM1         | fat storage-inducing transmembrane protein 1                                   | -0.931  | 0.0039 |
| 16782637 |               |                                                                                | -0.8346 | 0.0002 |
| 16782640 | RNF31         | ring finger protein 31                                                         | -0.437  | 0.0008 |
| 16782744 | TSSK4         | testis-specific serine kinase 4                                                | -0.3184 | 0.0202 |
| 16782754 | GMMPR2        | guanosine monophosphate reductase 2                                            | -0.3796 | 0.0024 |
| 16782786 | NOP9          | NOP9 nucleolar protein homolog (yeast)                                         | -0.4677 | 0.0005 |
| 16782805 | LTB4R2        | leukotriene B4 receptor 2                                                      | -0.3253 | 0.002  |
| 16782811 | LTB4R2        | leukotriene B4 receptor 2                                                      | -0.5216 | 0.001  |
| 16782818 | LTB4R         | leukotriene B4 receptor                                                        | -0.6042 | 0.0002 |

|          |           |                                                                                         |         |        |
|----------|-----------|-----------------------------------------------------------------------------------------|---------|--------|
| 16782826 | NFATC4    | nuclear factor of activated T-cells, cytoplasmic, calcineurin-dependent 4               | -0.7073 | 0.0056 |
| 16782876 | KHNYN     | KH and NYN domain containing                                                            | -0.4328 | 0.0019 |
| 16782889 |           |                                                                                         | -0.1852 | 0.0377 |
| 16783047 | G2E3      | G2/M-phase specific E3 ubiquitin protein ligase                                         | -0.3177 | 0.0403 |
| 16783075 | SCFD1     | sec1 family domain containing 1                                                         | -0.3412 | 0.0051 |
| 16783165 |           |                                                                                         | -0.3237 | 0.003  |
| 16783170 |           |                                                                                         | -0.33   | 0.0046 |
| 16783215 | ARHGAP5   | Rho GTPase activating protein 5                                                         | -0.5902 | 0.0011 |
| 16783297 |           |                                                                                         | -0.341  | 0.037  |
| 16783299 |           |                                                                                         | -0.2709 | 0.0252 |
| 16783310 | SRP54     | signal recognition particle 54kDa                                                       | -0.4084 | 0.0001 |
| 16783342 | FAM177A1  | family with sequence similarity 177, member A1                                          | -0.4719 | 0.0011 |
| 16783368 | KIAA0391  | KIAA0391                                                                                | -0.3682 | 0.0026 |
| 16783389 | PSMA6     | proteasome (prosome, macropain) subunit, alpha type, 6                                  | -0.3999 | 0.0001 |
| 16783623 | GEMIN2    | gem (nuclear organelle) associated protein 2                                            | -0.2181 | 0.0266 |
| 16783735 |           |                                                                                         | -0.4462 | 0.0043 |
| 16783764 | C14orf28  | chromosome 14 open reading frame 28                                                     | -0.2805 | 0.0192 |
| 16783773 | FAM179B   | family with sequence similarity 179, member B                                           | -0.3287 | 0.0378 |
| 16783800 | PRPF39    | PRP39 pre-mRNA processing factor 39 homolog (S. cerevisiae)                             | -0.3048 | 0.0496 |
| 16783832 |           |                                                                                         | -0.5998 | 0      |
| 16783836 | FANCM     | Fanconi anemia, complementation group M                                                 | -0.5159 | 0.013  |
| 16783905 | LRR1      | leucine rich repeat protein 1                                                           | -0.3545 | 0.0069 |
| 16783927 | KLHDC1    | kelch domain containing 1                                                               | -0.3738 | 0.0087 |
| 16783944 | KLHDC2    | kelch domain containing 2                                                               | -0.6541 | 0      |
| 16783974 | ARF6      | ADP-ribosylation factor 6                                                               | -0.2958 | 0.0005 |
| 16784003 |           |                                                                                         | -0.3379 | 0.0496 |
| 16784036 |           |                                                                                         | -0.2431 | 0.0222 |
| 16784098 | FRMD6     | FERM domain containing 6                                                                | -0.4413 | 0.0066 |
| 16784180 | C14orf166 | chromosome 14 open reading frame 166                                                    | -0.3696 | 0.0041 |
| 16784226 |           |                                                                                         | -0.6026 | 0.0089 |
| 16784228 | PSMC6     | proteasome (prosome, macropain) 26S subunit, ATPase, 6                                  | -0.4855 | 0.0004 |
| 16784272 |           |                                                                                         | -0.2932 | 0.041  |
| 16784275 |           |                                                                                         | -0.2831 | 0.0362 |
| 16784299 | CDKN3     | cyclin-dependent kinase inhibitor 3                                                     | -1.0393 | 0.0028 |
| 16784367 | SOCS4     | suppressor of cytokine signaling 4                                                      | -0.4157 | 0.0006 |
| 16784375 | MAPK1IP1L | mitogen-activated protein kinase 1 interacting protein 1-like                           | -0.5913 | 0.0001 |
| 16784398 | FBXO34    | F-box protein 34                                                                        | -0.4044 | 0.0004 |
| 16784493 |           |                                                                                         | -0.1293 | 0.0489 |
| 16784578 |           |                                                                                         | -0.3729 | 0.0373 |
| 16784582 | AP5M1     | adaptor-related protein complex 5, mu 1 subunit                                         | -0.2843 | 0.0036 |
| 16784605 | NAA30     | N(alpha)-acetyltransferase 30, NatC catalytic subunit                                   | -0.4216 | 0.008  |
| 16784617 | ACTR10    | actin-related protein 10 homolog (S. cerevisiae)                                        | -0.3332 | 0.0063 |
| 16784642 | PSMA3     | proteasome (prosome, macropain) subunit, alpha type, 3                                  | -0.3246 | 0.0112 |
| 16784664 | ARID4A    | AT rich interactive domain 4A (RBP1-like)                                               | -0.4213 | 0.0133 |
| 16784707 |           |                                                                                         | -0.621  | 0.0046 |
| 16784710 | KIAA0586  | KIAA0586                                                                                | -0.4855 | 0.0029 |
| 16784760 | DACT1     | dapper, antagonist of beta-catenin, homolog 1 (Xenopus laevis)                          | -0.5413 | 0.0253 |
| 16784829 | JKAMP     | JNK1/MAPK8-associated membrane protein                                                  | -0.2248 | 0.0034 |
| 16784883 | C14orf135 | chromosome 14 open reading frame 135                                                    | -0.5949 | 0.0005 |
| 16785058 | HIF1A     | hypoxia inducible factor 1, alpha subunit (basic helix-loop-helix transcription factor) | -0.287  | 0.0219 |
| 16785086 | SNAPC1    | small nuclear RNA activating complex, polypeptide 1, 43kDa                              | -0.3841 | 0.0302 |
| 16785144 |           |                                                                                         | -0.5194 | 0.0026 |

|          |              |                                                                                                                                         |         |        |
|----------|--------------|-----------------------------------------------------------------------------------------------------------------------------------------|---------|--------|
| 16785316 | MTHFD1       | methylenetetrahydrofolate dehydrogenase (NADP+ dependent) 1, methenyltetrahydrofolate cyclohydrolase, formyltetrahydrofolate synthetase | -0.3445 | 0.0013 |
| 16785367 | ZBTB1        | zinc finger and BTB domain containing 1                                                                                                 | -0.1674 | 0.0476 |
| 16785437 | CHURC1-FNTB  | CHURC1-FNTB readthrough                                                                                                                 | -0.4285 | 0.0005 |
| 16785476 | LOC100506321 | uncharacterized LOC100506321                                                                                                            | -0.3304 | 0.0218 |
| 16785631 | EIF2S1       | eukaryotic translation initiation factor 2, subunit 1 alpha, 35kDa                                                                      | -0.8369 | 0      |
| 16785769 | EXD2         | exonuclease 3'-5' domain containing 2                                                                                                   | -0.2266 | 0.0093 |
| 16785789 | GALNTL1      | UDP-N-acetyl-alpha-D-galactosamine:polypeptide N-acetylgalactosaminyltransferase-like 1                                                 | -0.4438 | 0.0404 |
| 16785821 | SLC39A9      | solute carrier family 39 (zinc transporter), member 9                                                                                   | -0.4464 | 0.0002 |
| 16785928 |              |                                                                                                                                         | -0.3923 | 0.0094 |
| 16785952 | PCNX         | pecanex homolog (Drosophila)                                                                                                            | -0.6695 | 0      |
| 16786007 |              |                                                                                                                                         | -0.3277 | 0.0247 |
| 16786010 | SIPA1L1      | signal-induced proliferation-associated 1 like 1                                                                                        | -0.473  | 0.0248 |
| 16786060 | LOC145474    | uncharacterized LOC145474                                                                                                               | -0.3001 | 0.0412 |
| 16786104 | DCAF4        | DDB1 and CUL4 associated factor 4                                                                                                       | -0.4205 | 0.0024 |
| 16786133 | RBM25        | RNA binding motif protein 25                                                                                                            | -0.3681 | 0.0123 |
| 16786167 | PSEN1        | presenilin 1                                                                                                                            | -0.3082 | 0.0121 |
| 16786255 | ACOT2        | acyl-CoA thioesterase 2                                                                                                                 | -0.5611 | 0.0012 |
| 16786326 | ZNF410       | zinc finger protein 410                                                                                                                 | -0.6466 | 0.0001 |
| 16786367 | COQ6         | coenzyme Q6 homolog, monooxygenase (S. cerevisiae)                                                                                      | -0.3424 | 0.0212 |
| 16786432 | LIN52        | lin-52 homolog (C. elegans)                                                                                                             | -0.2363 | 0.0229 |
| 16786475 | FCF1         | FCF1 small subunit (SSU) processome component homolog (S. cerevisiae)                                                                   | -0.3847 | 0.0048 |
| 16786492 | YLPM1        | YLP motif containing 1                                                                                                                  | -0.3088 | 0.0081 |
| 16786524 | DLST         | dihydrolipoamide S-succinyltransferase (E2 component of 2-oxo-glutarate complex)                                                        | -0.3233 | 0.0049 |
| 16786548 | EIF2B2       | eukaryotic translation initiation factor 2B, subunit 2 beta, 39kDa                                                                      | -0.5099 | 0.0055 |
| 16786587 | FOS          | FBJ murine osteosarcoma viral oncogene homolog                                                                                          | -0.6729 | 0.0152 |
| 16786607 | JDP2         | Jun dimerization protein 2                                                                                                              | -0.2172 | 0.0271 |
| 16786652 | TTLL5        | tubulin tyrosine ligase-like family, member 5                                                                                           | -0.3636 | 0.0105 |
| 16786713 | IFT43        | intraflagellar transport 43 homolog (Chlamydomonas)                                                                                     | -0.2029 | 0.0243 |
| 16786738 | C14orf118    | chromosome 14 open reading frame 118                                                                                                    | -0.228  | 0.0115 |
| 16786780 | C14orf118    | chromosome 14 open reading frame 118                                                                                                    | -0.4578 | 0.0001 |
| 16786801 | VASH1        | vasohibin 1                                                                                                                             | -0.4606 | 0.0075 |
| 16786908 | GSTZ1        | glutathione S-transferase zeta 1                                                                                                        | -0.2303 | 0.0029 |
| 16786941 | AHSA1        | AHA1, activator of heat shock 90kDa protein ATPase homolog 1 (yeast)                                                                    | -0.3029 | 0.0032 |
| 16786964 |              |                                                                                                                                         | -0.31   | 0.0088 |
| 16786966 | SLIRP        | SRA stem-loop interacting RNA binding protein                                                                                           | -0.2391 | 0.0141 |
| 16787151 |              |                                                                                                                                         | -0.5369 | 0.0445 |
| 16787279 | ZC3H14       | zinc finger CCCH-type containing 14                                                                                                     | -0.4239 | 0.0002 |
| 16787342 | LOC100506777 | uncharacterized LOC100506777                                                                                                            | -0.25   | 0.019  |
| 16787352 | LOC400236    | uncharacterized LOC400236                                                                                                               | -0.271  | 0.0483 |
| 16787364 | TDP1         | tyrosyl-DNA phosphodiesterase 1                                                                                                         | -0.2843 | 0.0094 |
| 16787409 | PSMC1        | proteasome (prosome, macropain) 26S subunit, ATPase, 1                                                                                  | -0.3306 | 0.0021 |
| 16787540 | CPSF2        | cleavage and polyadenylation specific factor 2, 100kDa                                                                                  | -0.4836 | 0      |
| 16787669 | C14orf109    | chromosome 14 open reading frame 109                                                                                                    | -0.3388 | 0.0013 |
| 16787679 | UBR7         | ubiquitin protein ligase E3 component n-recognin 7 (putative)                                                                           | -0.5995 | 0.0002 |
| 16787799 | IFI27L1      | interferon, alpha-inducible protein 27-like 1                                                                                           | -0.4311 | 0.0276 |
| 16787882 | SERPINA5     | serpin peptidase inhibitor, clade A (alpha-1 antitrypsin), member 5                                                                     | -0.4102 | 0.0378 |
| 16787951 | GLRX5        | glutaredoxin 5                                                                                                                          | -0.3448 | 0.0018 |
| 16788023 | BDKRB2       | bradykinin receptor B2                                                                                                                  | -0.2648 | 0.0107 |
| 16788083 | PAPOLA       | poly(A) polymerase alpha                                                                                                                | -0.4048 | 0.0034 |
| 16788142 | VRK1         | vaccinia related kinase 1                                                                                                               | -0.4774 | 0.0351 |
| 16788223 | CCNK         | cyclin K                                                                                                                                | -0.2642 | 0.007  |

|          |              |                                                                    |         |        |
|----------|--------------|--------------------------------------------------------------------|---------|--------|
| 16788384 | YY1          | YY1 transcription factor                                           | -0.2237 | 0.0363 |
| 16788390 |              |                                                                    | -0.2218 | 0.0261 |
| 16788393 |              |                                                                    | -0.3785 | 0.0076 |
| 16788488 | MEG3         | maternally expressed 3 (non-protein coding)                        | -2.2924 | 0      |
| 16788520 | MEG3         | maternally expressed 3 (non-protein coding)                        | -3.2809 | 0      |
| 16788522 | MIR770       | microRNA 770                                                       | -0.9458 | 0.0001 |
| 16788528 | MIR665       | microRNA 665                                                       | -0.4345 | 0.002  |
| 16788530 | MIR431       | microRNA 431                                                       | -0.1508 | 0.0409 |
| 16788534 | MIR127       | microRNA 127                                                       | -0.2128 | 0.0169 |
| 16788540 | LOC100288160 | esophagus cancer-related gene-2 interaction susceptibility protein | -0.3426 | 0.0125 |
| 16788542 | MEG8         | maternally expressed 8 (non-protein coding)                        | -2.0087 | 0      |
| 16788562 |              |                                                                    | -0.3241 | 0.0012 |
| 16788564 | MIR370       | microRNA 370                                                       | -0.575  | 0.0158 |
| 16788566 |              |                                                                    | -1.4039 | 0.0012 |
| 16788568 |              |                                                                    | -1.166  | 0.001  |
| 16788570 | SNORD113-1   | small nucleolar RNA, C/D box 113-1                                 | -3.0572 | 0      |
| 16788572 |              |                                                                    | -2.7116 | 0      |
| 16788574 | SNORD113-2   | small nucleolar RNA, C/D box 113-2                                 | -2.0069 | 0      |
| 16788576 | SNORD113-3   | small nucleolar RNA, C/D box 113-3                                 | -3.8353 | 0      |
| 16788578 | SNORD113-4   | small nucleolar RNA, C/D box 113-4                                 | -3.2931 | 0      |
| 16788602 | SNORD113-5   | small nucleolar RNA, C/D box 113-5                                 | -2.0096 | 0      |
| 16788604 |              |                                                                    | -1.1347 | 0.001  |
| 16788606 | SNORD113-6   | small nucleolar RNA, C/D box 113-6                                 | -0.8624 | 0.0002 |
| 16788608 |              |                                                                    | -2.3912 | 0      |
| 16788610 | SNORD113-7   | small nucleolar RNA, C/D box 113-7                                 | -1.4934 | 0      |
| 16788612 | SNORD113-8   | small nucleolar RNA, C/D box 113-8                                 | -3.0544 | 0      |
| 16788614 | SNORD113-9   | small nucleolar RNA, C/D box 113-9                                 | -2.6627 | 0      |
| 16788616 | SNORD114-1   | small nucleolar RNA, C/D box 114-1                                 | -3.8007 | 0      |
| 16788618 | SNORD114-2   | small nucleolar RNA, C/D box 114-2                                 | -3.4684 | 0      |
| 16788620 | SNORD114-3   | small nucleolar RNA, C/D box 114-3                                 | -3.4192 | 0      |
| 16788622 | SNORD114-4   | small nucleolar RNA, C/D box 114-4                                 | -2.2937 | 0      |
| 16788624 | SNORD114-5   | small nucleolar RNA, C/D box 114-5                                 | -0.8958 | 0.0128 |
| 16788626 |              |                                                                    | -2.769  | 0      |
| 16788628 | SNORD114-6   | small nucleolar RNA, C/D box 114-6                                 | -2.9331 | 0      |
| 16788630 |              |                                                                    | -2.674  | 0      |
| 16788649 | SNORD114-7   | small nucleolar RNA, C/D box 114-7                                 | -3.3523 | 0      |
| 16788651 | SNORD114-8   | small nucleolar RNA, C/D box 114-8                                 | -1.7106 | 0      |
| 16788653 | SNORD114-9   | small nucleolar RNA, C/D box 114-9                                 | -1.5444 | 0      |
| 16788655 | SNORD114-10  | small nucleolar RNA, C/D box 114-10                                | -1.8366 | 0.0001 |
| 16788657 | SNORD114-11  | small nucleolar RNA, C/D box 114-11                                | -3.0854 | 0      |
| 16788659 | SNORD114-12  | small nucleolar RNA, C/D box 114-12                                | -3.3108 | 0      |
| 16788661 | SNORD114-13  | small nucleolar RNA, C/D box 114-13                                | -3.0187 | 0      |
| 16788663 | SNORD114-14  | small nucleolar RNA, C/D box 114-14                                | -3.0244 | 0      |
| 16788665 | SNORD114-15  | small nucleolar RNA, C/D box 114-15                                | -3.0243 | 0      |
| 16788667 | SNORD114-16  | small nucleolar RNA, C/D box 114-16                                | -2.0424 | 0      |
| 16788669 | SNORD114-17  | small nucleolar RNA, C/D box 114-17                                | -3.0901 | 0      |
| 16788671 | SNORD114-18  | small nucleolar RNA, C/D box 114-18                                | -2.0907 | 0      |
| 16788673 | SNORD114-19  | small nucleolar RNA, C/D box 114-19                                | -3.9415 | 0      |
| 16788675 |              |                                                                    | -2.3136 | 0      |
| 16788677 |              |                                                                    | -4.3111 | 0      |
| 16788679 |              |                                                                    | -2.0465 | 0      |
| 16788681 | SNORD114-20  | small nucleolar RNA, C/D box 114-20                                | -2.0017 | 0.0001 |
| 16788683 | SNORD114-21  | small nucleolar RNA, C/D box 114-21                                | -2.8799 | 0      |
| 16788685 | SNORD114-22  | small nucleolar RNA, C/D box 114-22                                | -2.0127 | 0      |
| 16788687 | SNORD114-23  | small nucleolar RNA, C/D box 114-23                                | -1.6273 | 0.0001 |
| 16788689 | SNORD114-24  | small nucleolar RNA, C/D box 114-24                                | -2.3332 | 0      |
| 16788691 | SNORD114-25  | small nucleolar RNA, C/D box 114-25                                | -2.308  | 0      |
| 16788693 | SNORD114-26  | small nucleolar RNA, C/D box 114-26                                | -2.2381 | 0      |
| 16788695 | SNORD114-27  | small nucleolar RNA, C/D box 114-27                                | -2.018  | 0      |
| 16788697 | SNORD114-28  | small nucleolar RNA, C/D box 114-28                                | -2.3267 | 0      |

|          |             |                                                              |         |        |
|----------|-------------|--------------------------------------------------------------|---------|--------|
| 16788699 | SNORD114-29 | small nucleolar RNA, C/D box 114-29                          | -1.6392 | 0.0001 |
| 16788701 | SNORD114-30 | small nucleolar RNA, C/D box 114-30                          | -3.2894 | 0      |
| 16788703 | SNORD114-31 | small nucleolar RNA, C/D box 114-31                          | -2.197  | 0      |
| 16788705 |             |                                                              | -2.1007 | 0      |
| 16788707 |             |                                                              | -2.2476 | 0      |
| 16788709 |             |                                                              | -2.4946 | 0      |
| 16788715 | MIR299      | microRNA 299                                                 | -0.5276 | 0.0099 |
| 16788717 | MIR380      | microRNA 380                                                 | -0.91   | 0.0026 |
| 16788719 | MIR1197     | microRNA 1197                                                | -0.4252 | 0.0456 |
| 16788723 | MIR758      | microRNA 758                                                 | -0.6469 | 0.0117 |
| 16788725 | MIR329-1    | microRNA 329-1                                               | -0.7988 | 0.0198 |
| 16788727 | MIR329-2    | microRNA 329-2                                               | -0.5603 | 0.0295 |
| 16788731 | MIR1193     | microRNA 1193                                                | -0.295  | 0.0227 |
| 16788733 | MIR543      | microRNA 543                                                 | -1.9285 | 0.0002 |
| 16788741 | MIR654      | microRNA 654                                                 | -1.1359 | 0.0041 |
| 16788743 | MIR376B     | microRNA 376b                                                | -1.0122 | 0.0352 |
| 16788747 | MIR300      | microRNA 300                                                 | -1.1319 | 0.0035 |
| 16788749 | MIR1185-1   | microRNA 1185-1                                              | -0.7878 | 0.0381 |
| 16788751 | MIR1185-2   | microRNA 1185-2                                              | -1.7361 | 0.0002 |
| 16788758 | MIR487B     | microRNA 487b                                                | -1.0011 | 0.0033 |
| 16788760 | MIR539      | microRNA 539                                                 | -0.9024 | 0.0093 |
| 16788762 | MIR889      | microRNA 889                                                 | -0.7785 | 0.0163 |
| 16788764 |             |                                                              | -1.7521 | 0.0004 |
| 16788772 | MIR134      | microRNA 134                                                 | -0.4257 | 0.0038 |
| 16788774 | MIR668      | microRNA 668                                                 | -1.1054 | 0.001  |
| 16788780 | MIR154      | microRNA 154                                                 | -0.889  | 0.0422 |
| 16788784 | MIR377      | microRNA 377                                                 | -0.6711 | 0.0371 |
| 16788796 | MIR656      | microRNA 656                                                 | -0.4262 | 0.0424 |
| 16788798 | MEG9        | maternally expressed 9 (non-protein coding)                  | -0.424  | 0.0116 |
| 16788817 |             |                                                              | -0.1292 | 0.035  |
| 16788833 | PPP2R5C     | protein phosphatase 2, regulatory subunit B', gamma          | -0.5384 | 0      |
| 16788883 | DYNC1H1     | dynein, cytoplasmic 1, heavy chain 1                         | -0.3476 | 0.0202 |
| 16788973 | WDR20       | WD repeat domain 20                                          | -0.4365 | 0.0001 |
| 16789019 | TECPR2      | tectonin beta-propeller repeat containing 2                  | -0.2104 | 0.0217 |
| 16789059 | RCOR1       | REST corepressor 1                                           | -0.4407 | 0.003  |
| 16789178 | EIF5        | eukaryotic translation initiation factor 5                   | -0.4812 | 0.0031 |
| 16789209 | MARK3       | MAP/microtubule affinity-regulating kinase 3                 | -0.4418 | 0.002  |
| 16789258 | KLC1        | kinesin light chain 1                                        | -0.2664 | 0.0032 |
| 16789289 | APOPT1      | apoptogenic 1, mitochondrial                                 | -0.3542 | 0.0009 |
| 16789303 |             |                                                              | -0.4399 | 0.0006 |
| 16789429 | C14orf144   | chromosome 14 open reading frame 144                         | -0.2757 | 0.0401 |
| 16789509 | SIVA1       | SIVA1, apoptosis-inducing factor                             | -0.3706 | 0.005  |
| 16789536 | KIAA0284    | KIAA0284                                                     | -0.5308 | 0.0016 |
| 16789589 | C14orf79    | chromosome 14 open reading frame 79                          | -0.3162 | 0.0016 |
| 16789624 | BTBD6       | BTB (POZ) domain containing 6                                | -0.2935 | 0.0287 |
| 16789681 | MTA1        | metastasis associated 1                                      | -0.3933 | 0.0017 |
| 16789899 | TTC5        | tetratricopeptide repeat domain 5                            | -0.412  | 0.0078 |
| 16789926 | CCNB1IP1    | cyclin B1 interacting protein 1, E3 ubiquitin protein ligase | -0.7131 | 0.0029 |
| 16789953 | SNORD126    | small nucleolar RNA, C/D box 126                             | -0.664  | 0.0067 |
| 16789955 | RPPH1       | ribonuclease P RNA component H1                              | -0.2944 | 0.0047 |
| 16790059 | TMEM55B     | transmembrane protein 55B                                    | -0.4543 | 0.0005 |
| 16790110 |             |                                                              | -0.2351 | 0.0149 |
| 16790202 | ZNF219      | zinc finger protein 219                                      | -0.2344 | 0.0444 |
| 16790233 | HNRNPC      | heterogeneous nuclear ribonucleoprotein C (C1/C2)            | -0.477  | 0.0015 |
| 16790246 |             |                                                              | -0.6772 | 0.0005 |
| 16790247 |             |                                                              | -0.7369 | 0.0148 |
| 16790258 |             |                                                              | -0.4726 | 0.0272 |
| 16790259 |             |                                                              | -0.487  | 0.0006 |
| 16790260 |             |                                                              | -0.659  | 0.0019 |
| 16790261 |             |                                                              | -0.8201 | 0.0001 |

|          |              |                                                                 |         |        |
|----------|--------------|-----------------------------------------------------------------|---------|--------|
| 16790262 |              |                                                                 | -0.9054 | 0.0004 |
| 16790264 |              |                                                                 | -0.5084 | 0.0182 |
| 16790267 | SUPT16H      | suppressor of Ty 16 homolog ( <i>S. cerevisiae</i> )            | -0.5454 | 0.0006 |
| 16790307 | CHD8         | chromodomain helicase DNA binding protein 8                     | -0.4967 | 0.0001 |
| 16790364 | RAB2B        | RAB2B, member RAS oncogene family                               | -0.3376 | 0.0081 |
| 16790381 | METTL3       | methyltransferase like 3                                        | -0.2622 | 0.0482 |
| 16790464 | DAD1         | defender against cell death 1                                   | -0.3332 | 0.0004 |
| 16790467 |              |                                                                 | -1.6187 | 0      |
| 16790468 |              |                                                                 | -0.2678 | 0.0109 |
| 16790469 |              |                                                                 | -0.3261 | 0.0011 |
| 16790470 |              |                                                                 | -0.242  | 0.0039 |
| 16790472 |              |                                                                 | -0.3206 | 0.0002 |
| 16790473 |              |                                                                 | -0.3813 | 0.001  |
| 16790474 |              |                                                                 | -0.5466 | 0.0035 |
| 16790556 | PRMT5        | protein arginine methyltransferase 5                            | -0.4088 | 0.0021 |
| 16790659 | PSMB5        | proteasome (prosome, macropain) subunit, beta type, 5           | -0.3566 | 0.003  |
| 16790693 | ACIN1        | apoptotic chromatin condensation inducer 1                      | -0.2663 | 0.0143 |
| 16790776 | HOMEZ        | homeobox and leucine zipper encoding                            | -0.3139 | 0.0013 |
| 16791023 | DHRS4-AS1    | DHRS4 antisense RNA 1 (non-protein coding)                      | -0.292  | 0.0395 |
| 16791044 | EMC9         | ER membrane protein complex subunit 9                           | -0.6292 | 0      |
| 16791059 | PSME2        | proteasome (prosome, macropain) activator subunit 2 (PA28 beta) | -0.3378 | 0.0058 |
| 16791086 | IPO4         | importin 4                                                      | -0.6272 | 0      |
| 16791135 | TM9SF1       | transmembrane 9 superfamily member 1                            | -0.3816 | 0.0014 |
| 16791167 | MDP1         | magnesium-dependent phosphatase 1                               | -0.2507 | 0.0042 |
| 16791300 | CIDEB        | cell death-inducing DFFA-like effector b                        | -0.704  | 0      |
| 16791401 | SDR39U1      | short chain dehydrogenase/reductase family 39U, member 1        | -0.3045 | 0.0106 |
| 16791642 | STRN3        | striatin, calmodulin binding protein 3                          | -0.4989 | 0.0006 |
| 16791669 | HECTD1       | HECT domain containing E3 ubiquitin protein ligase 1            | -0.3827 | 0.0099 |
| 16791734 | HEATR5A      | HEAT repeat containing 5A                                       | -0.6963 | 0      |
| 16791781 | C14orf126    | chromosome 14 open reading frame 126                            | -0.4592 | 0      |
| 16791810 | ARHGAP5-AS1  | ARHGAP5 antisense RNA 1 (non-protein coding)                    | -0.6735 | 0.0054 |
| 16791854 | EAPP         | E2F-associated phosphoprotein                                   | -0.4336 | 0.0006 |
| 16791873 | SNX6         | sorting nexin 6                                                 | -0.5476 | 0.0001 |
| 16791909 | BAZ1A        | bromodomain adjacent to zinc finger domain, 1A                  | -0.306  | 0.0368 |
| 16791962 | PPP2R3C      | protein phosphatase 2, regulatory subunit B", gamma             | -0.5128 | 0.0003 |
| 16792010 | RALGAPA1     | Ral GTPase activating protein, alpha subunit 1 (catalytic)      | -0.4726 | 0.0001 |
| 16792101 | MBIP         | MAP3K12 binding inhibitory protein 1                            | -0.3725 | 0.0146 |
| 16792226 | SEC23A       | Sec23 homolog A ( <i>S. cerevisiae</i> )                        | -0.4736 | 0.0001 |
| 16792268 | TRAPPC6B     | trafficking protein particle complex 6B                         | -0.5027 | 0.0004 |
| 16792281 | LOC100288846 | uncharacterized LOC100288846                                    | -0.2089 | 0.0066 |
| 16792347 | KLHL28       | kelch-like 28 ( <i>Drosophila</i> )                             | -0.3941 | 0.0029 |
| 16792369 | FKBP3        | FK506 binding protein 3, 25kDa                                  | -0.5295 | 0.0002 |
| 16792381 | MIS18BP1     | MIS18 binding protein 1                                         | -0.5187 | 0.0097 |
| 16792407 |              |                                                                 | -0.179  | 0.0381 |
| 16792486 | RPS29        | ribosomal protein S29                                           | -0.3663 | 0.0013 |
| 16792501 | RPL36AL      | ribosomal protein L36a-like                                     | -0.2239 | 0.0246 |
| 16792507 |              |                                                                 | -0.259  | 0.0078 |
| 16792510 | DNAAF2       | dynein, axonemal, assembly factor 2                             | -0.293  | 0.0193 |
| 16792550 | NEMF         | nuclear export mediator factor                                  | -0.3554 | 0.0063 |
| 16792601 |              |                                                                 | -0.3058 | 0.0039 |
| 16792615 | C14orf182    | chromosome 14 open reading frame 182                            | -0.1811 | 0.0337 |
| 16792650 | METTL21D     | methyltransferase like 21D                                      | -0.3542 | 0.0042 |
| 16792659 | SOS2         | son of sevenless homolog 2 ( <i>Drosophila</i> )                | -0.3257 | 0.0226 |
| 16792754 | MAP4K5       | mitogen-activated protein kinase kinase kinase kinase 5         | -0.3929 | 0.0111 |
| 16792798 | SAV1         | salvador homolog 1 ( <i>Drosophila</i> )                        | -0.4372 | 0.0004 |
| 16792954 | NID2         | nidogen 2 (osteonidogen)                                        | -0.7666 | 0.0023 |
| 16793024 | ERO1L        | ERO1-like ( <i>S. cerevisiae</i> )                              | -0.6024 | 0.0067 |
| 16793052 | GNPNAT1      | glucosamine-phosphate N-acetyltransferase 1                     | -0.2495 | 0.0343 |



|          |              |                                                               |         |        |
|----------|--------------|---------------------------------------------------------------|---------|--------|
| 16793149 | CNIH         | cornichon homolog (Drosophila)                                | -0.5399 | 0      |
| 16793159 | GMFB         | glia maturation factor, beta                                  | -0.4983 | 0.0001 |
| 16793190 | WDHD1        | WD repeat and HMG-box DNA binding protein 1                   | -0.6357 | 0.0083 |
| 16793225 | DLGAP5       | discs, large (Drosophila) homolog-associated protein 5        | -1.2553 | 0.0006 |
| 16793252 |              |                                                               | -0.3767 | 0.0084 |
| 16793259 |              |                                                               | -0.3505 | 0.0029 |
| 16793263 | ATG14        | autophagy related 14                                          | -0.4709 | 0.0011 |
| 16793290 | KTN1-AS1     | KTN1 antisense RNA 1 (non-protein coding)                     | -0.2142 | 0.0373 |
| 16793353 | EXOC5        | exocyst complex component 5                                   | -0.5008 | 0.0001 |
| 16793423 | C14orf37     | chromosome 14 open reading frame 37                           | -0.7631 | 0.0387 |
| 16793438 | FLJ31306     | uncharacterized LOC379025                                     | -0.49   | 0.002  |
| 16793455 |              |                                                               | -0.5265 | 0.0027 |
| 16793460 | TIMM9        | translocase of inner mitochondrial membrane 9 homolog (yeast) | -0.4439 | 0.0033 |
| 16793475 | GPR135       | G protein-coupled receptor 135                                | -0.4793 | 0.0021 |
| 16793488 | C14orf149    | chromosome 14 open reading frame 149                          | -0.4007 | 0.0166 |
| 16793553 |              |                                                               | -0.2679 | 0.0207 |
| 16793632 | TRMT5        | tRNA methyltransferase 5 homolog (S. cerevisiae)              | -0.2949 | 0.049  |
| 16793674 |              |                                                               | -0.6415 | 0.004  |
| 16793678 | HIF1A-AS2    | HIF1A antisense RNA 2 (non-protein coding)                    | -0.3409 | 0.0084 |
| 16793714 |              |                                                               | -0.2005 | 0.0089 |
| 16793721 | PPP2R5E      | protein phosphatase 2, regulatory subunit B', epsilon isoform | -0.5083 | 0.0005 |
| 16793741 | WDR89        | WD repeat domain 89                                           | -0.525  | 0.0006 |
| 16793750 | SGPP1        | sphingosine-1-phosphate phosphatase 1                         | -0.232  | 0.0471 |
| 16793805 | ZBTB25       | zinc finger and BTB domain containing 25                      | -0.4061 | 0.0011 |
| 16793999 | PLEK2        | pleckstrin 2                                                  | -1.4413 | 0.0072 |
| 16794030 | PIGH         | phosphatidylinositol glycan anchor biosynthesis, class H      | -0.2604 | 0.0136 |
| 16794064 | RDH11        | retinol dehydrogenase 11 (all-trans/9-cis/11-cis)             | -0.7057 | 0.0014 |
| 16794084 | ZFYVE26      | zinc finger, FYVE domain containing 26                        | -0.2823 | 0.0059 |
| 16794177 | ACTN1        | actinin, alpha 1                                              | -0.6315 | 0.0001 |
| 16794220 | DCAF5        | DDB1 and CUL4 associated factor 5                             | -0.4234 | 0.0002 |
| 16794241 |              |                                                               | -0.2401 | 0.0217 |
| 16794256 | ERH          | enhancer of rudimentary homolog (Drosophila)                  | -0.4867 | 0.0002 |
| 16794257 |              |                                                               | -0.4057 | 0.0007 |
| 16794258 |              |                                                               | -0.4534 | 0.035  |
| 16794260 |              |                                                               | -0.5558 | 0.0008 |
| 16794261 |              |                                                               | -0.51   | 0.0006 |
| 16794262 |              |                                                               | -0.8519 | 0.0019 |
| 16794266 | LOC100289511 | uncharacterized LOC100289511                                  | -0.2    | 0.0054 |
| 16794326 | MED6         | mediator complex subunit 6                                    | -0.2677 | 0.0058 |
| 16794368 |              |                                                               | -0.2365 | 0.0178 |
| 16794373 | C14orf56     | chromosome 14 open reading frame 56                           | -0.1063 | 0.0178 |
| 16794441 | ZFYVE1       | zinc finger, FYVE domain containing 1                         | -0.4859 | 0.0004 |
| 16794464 |              |                                                               | -0.2072 | 0.019  |
| 16794476 | NUMB         | numb homolog (Drosophila)                                     | -0.2479 | 0.0032 |
| 16794514 | HEATR4       | HEAT repeat containing 4                                      | -0.1303 | 0.0472 |
| 16794555 | C14orf43     | chromosome 14 open reading frame 43                           | -0.2989 | 0.0106 |
| 16794586 | FAM161B      | family with sequence similarity 161, member B                 | -0.4038 | 0.0045 |
| 16794656 | ABCD4        | ATP-binding cassette, sub-family D (ALD), member 4            | -0.2854 | 0.0219 |
| 16794767 | KIAA0317     | KIAA0317                                                      | -0.4469 | 0.0208 |
| 16794861 |              |                                                               | -0.5673 | 0.0024 |
| 16794888 | ACYP1        | acylphosphatase 1, erythrocyte (common) type                  | -0.7019 | 0.0056 |
| 16794898 | NEK9         | NIMA (never in mitosis gene a)- related kinase 9              | -0.4392 | 0.0003 |
| 16794935 | TMED10       | transmembrane emp24-like trafficking protein 10 (yeast)       | -0.2361 | 0.022  |
| 16794955 |              |                                                               | -0.9258 | 0.0125 |
| 16794966 | C14orf1      | chromosome 14 open reading frame 1                            | -0.7731 | 0.004  |
| 16794980 | TGFB3        | transforming growth factor, beta 3                            | -0.4242 | 0.0096 |
| 16794997 |              |                                                               | -0.4169 | 0      |
| 16795004 |              |                                                               | -0.2136 | 0.03   |
| 16795017 | LOC100506603 | uncharacterized LOC100506603                                  | -0.4561 | 0      |

|          |              |                                                                                                                                |         |        |
|----------|--------------|--------------------------------------------------------------------------------------------------------------------------------|---------|--------|
| 16795021 | ANGEL1       | angel homolog 1 (Drosophila)                                                                                                   | -0.4274 | 0.0022 |
| 16795082 | POMT2        | protein-O-mannosyltransferase 2                                                                                                | -0.3551 | 0.0109 |
| 16795149 | C14orf133    | chromosome 14 open reading frame 133                                                                                           | -0.374  | 0.0028 |
| 16795226 | SNW1         | SNW domain containing 1                                                                                                        | -0.3128 | 0.0008 |
| 16795285 | DIO2         | deiodinase, iodothyronine, type II                                                                                             | -0.2767 | 0.004  |
| 16795351 | GTF2A1       | general transcription factor IIA, 1, 19/37kDa                                                                                  | -0.4272 | 0.0018 |
| 16795485 |              |                                                                                                                                | -0.3626 | 0.0472 |
| 16795664 | FOXN3        | forkhead box N3                                                                                                                | -0.3135 | 0.0135 |
| 16795878 | SMEK1        | SMEK homolog 1, suppressor of mek1 (Dictyostelium)                                                                             | -0.449  | 0.0012 |
| 16796115 | MOAP1        | modulator of apoptosis 1                                                                                                       | -0.4744 | 0.0001 |
| 16796122 | C14orf142    | chromosome 14 open reading frame 142                                                                                           | -0.3361 | 0.0047 |
| 16796128 | BTBD7        | BTB (POZ) domain containing 7                                                                                                  | -0.3014 | 0.031  |
| 16796207 | DDX24        | DEAD (Asp-Glu-Ala-Asp) box polypeptide 24                                                                                      | -0.2598 | 0.0059 |
| 16796229 | IFI27L2      | interferon, alpha-inducible protein 27-like 2                                                                                  | -0.3352 | 0.0043 |
| 16796237 | SERPINA10    | serpin peptidase inhibitor, clade A (alpha-1 antitrypsin, antitrypsin), member 10                                              | -0.2215 | 0.0169 |
| 16796325 | DICER1       | dicer 1, ribonuclease type III                                                                                                 | -0.5467 | 0.0058 |
| 16796373 | MIR3173      | microRNA 3173                                                                                                                  | -0.2548 | 0.0129 |
| 16796412 | LINC00341    | long intergenic non-protein coding RNA 341                                                                                     | -0.4972 | 0.0179 |
| 16796444 | SNHG10       | small nucleolar RNA host gene 10 (non-protein coding)                                                                          | -0.429  | 0.0071 |
| 16796469 |              |                                                                                                                                | -0.2222 | 0.0201 |
| 16796479 | ATG2B        | autophagy related 2B                                                                                                           | -0.3492 | 0.0052 |
| 16796531 |              |                                                                                                                                | -0.3865 | 0.0409 |
| 16796662 |              |                                                                                                                                | -0.2579 | 0.0361 |
| 16796694 | WARS         | tryptophanyl-tRNA synthetase                                                                                                   | -0.2924 | 0.0158 |
| 16796749 |              |                                                                                                                                | -3.1752 | 0      |
| 16796752 | RTL1         | retrotransposon-like 1                                                                                                         | -0.4046 | 0.0054 |
| 16796814 | LOC100507295 | uncharacterized LOC100507295                                                                                                   | -0.2768 | 0.0387 |
| 16796823 |              |                                                                                                                                | -0.2184 | 0.039  |
| 16796898 | CINP         | cyclin-dependent kinase 2 interacting protein                                                                                  | -0.3926 | 0.0009 |
| 16796914 | CINP         | cyclin-dependent kinase 2 interacting protein                                                                                  | -0.3157 | 0.0435 |
| 16796919 | ANKRD9       | ankyrin repeat domain 9                                                                                                        | -0.2819 | 0.0069 |
| 16796938 | CDC42BPB     | CDC42 binding protein kinase beta (DMPK-like)                                                                                  | -0.5591 | 0.0003 |
| 16797014 | BAG5         | BCL2-associated athanogene 5                                                                                                   | -0.282  | 0.0036 |
| 16797025 | XRCC3        | X-ray repair complementing defective repair in Chinese hamster cells 3                                                         | -0.1683 | 0.0216 |
| 16797285 | BRF1         | BRF1 homolog, subunit of RNA polymerase III transcription initiation factor IIIB (S. cerevisiae)                               | -0.2423 | 0.0076 |
| 16797330 |              |                                                                                                                                | -0.493  | 0.0034 |
| 16797419 | IGHJ1        | immunoglobulin heavy joining 1                                                                                                 | -0.1999 | 0.0133 |
| 16797751 | TUBGCP5      | tubulin, gamma complex associated protein 5                                                                                    | -0.3618 | 0.0053 |
| 16798528 |              |                                                                                                                                | -0.2514 | 0.0061 |
| 16798765 | CHRFAM7A     | CHRNA7 (cholinergic receptor, nicotinic, alpha 7, exons 5-10) and FAM7A (family with sequence similarity 7A, exons A-E) fusion | -1.6232 | 0.0226 |
| 16798801 | ARHGAP11B    | Rho GTPase activating protein 11B                                                                                              | -0.6873 | 0.0044 |
| 16798810 |              |                                                                                                                                | -0.3471 | 0.0295 |
| 16798812 | LOC100288637 | OTU domain containing 7A pseudogene                                                                                            | -0.6125 | 0.0011 |
| 16798820 |              |                                                                                                                                | -0.3726 | 0.0358 |
| 16798919 | ARHGAP11A    | Rho GTPase activating protein 11A                                                                                              | -0.7538 | 0.0169 |
| 16799231 | SPRED1       | sprouty-related, EVH1 domain containing 1                                                                                      | -0.3857 | 0.045  |
| 16799426 | BUB1B        | budding uninhibited by benzimidazoles 1 homolog beta (yeast)                                                                   | -0.6517 | 0.0011 |
| 16799492 | LOC100505573 | uncharacterized LOC100505573                                                                                                   | -0.4169 | 0.022  |
| 16799517 | C15orf23     | chromosome 15 open reading frame 23                                                                                            | -0.3888 | 0.0064 |
| 16799598 | CASC5        | cancer susceptibility candidate 5                                                                                              | -0.9586 | 0.0055 |
| 16799637 | RAD51        | RAD51 homolog (S. cerevisiae)                                                                                                  | -0.5475 | 0.0019 |
| 16799667 | ZFYVE19      | zinc finger, FYVE domain containing 19                                                                                         | -0.149  | 0.0367 |
| 16799760 | CHP1         | calcineurin-like EF hand protein 1                                                                                             | -0.3361 | 0.0046 |
| 16799776 | OIP5-AS1     | OIP5 antisense RNA 1 (non-protein coding)                                                                                      | -0.4598 | 0.0042 |
| 16799811 |              |                                                                                                                                | -0.1797 | 0.0091 |

|          |              |                                                                                          |         |        |
|----------|--------------|------------------------------------------------------------------------------------------|---------|--------|
| 16799814 | RTF1         | Rtf1, Paf1/RNA polymerase II complex component, homolog (S. cerevisiae)                  | -0.3258 | 0.0262 |
| 16799852 | TYRO3        | TYRO3 protein tyrosine kinase                                                            | -0.5151 | 0.0001 |
| 16800108 | HAUS2        | HAUS augmin-like complex, subunit 2                                                      | -0.5378 | 0.0015 |
| 16800322 | SERF2        | small EDRK-rich factor 2                                                                 | -0.2725 | 0.0083 |
| 16800355 | WDR76        | WD repeat domain 76                                                                      | -0.7209 | 0.0059 |
| 16800406 | CTDSPL2      | CTD (carboxy-terminal domain, RNA polymerase II, polypeptide A) small phosphatase like 2 | -0.6915 | 0      |
| 16800431 | EIF3J        | eukaryotic translation initiation factor 3, subunit J                                    | -0.5388 | 0.0001 |
| 16800506 | SORD         | sorbitol dehydrogenase                                                                   | -0.5142 | 0.0158 |
| 16800836 |              |                                                                                          | -0.2895 | 0.0257 |
| 16800980 | GABPB1-AS1   | GABPB1 antisense RNA 1 (non-protein coding)                                              | -0.5308 | 0.0013 |
| 16800991 | USP8         | ubiquitin specific peptidase 8                                                           | -0.2829 | 0.0316 |
| 16801033 | SPPL2A       | signal peptide peptidase like 2A                                                         | -0.4215 | 0.0035 |
| 16801035 | AP4E1        | adaptor-related protein complex 4, epsilon 1 subunit                                     | -0.4623 | 0.002  |
| 16801063 | DCAF13P3     | DDB1 and CUL4 associated factor 13 pseudogene 3                                          | -0.4244 | 0.0137 |
| 16801143 | TMOD3        | tropomodulin 3 (ubiquitous)                                                              | -0.4593 | 0.0006 |
| 16801196 |              |                                                                                          | -0.3667 | 0.0482 |
| 16801400 | CGNL1        | cingulin-like 1                                                                          | -0.7955 | 0.0336 |
| 16801428 | GCOM1        | GRINL1A complex locus 1                                                                  | -0.2975 | 0.0115 |
| 16801473 | AQP9         | aquaporin 9                                                                              | -0.4366 | 0.0209 |
| 16801529 | RNF111       | ring finger protein 111                                                                  | -0.2824 | 0.0044 |
| 16801557 | CCNB2        | cyclin B2                                                                                | -1.1262 | 0.0013 |
| 16801624 |              |                                                                                          | -0.2362 | 0.0036 |
| 16801656 |              |                                                                                          | -0.6726 | 0.04   |
| 16801932 |              |                                                                                          | -0.2904 | 0.0237 |
| 16801995 | TRIP4        | thyroid hormone receptor interactor 4                                                    | -0.2203 | 0.031  |
| 16802100 | RNU5A-1      | RNA, U5A small nuclear 1                                                                 | -0.3495 | 0.0413 |
| 16802106 | PTPLAD1      | protein tyrosine phosphatase-like A domain containing 1                                  | -0.4731 | 0.0047 |
| 16802152 | RAB11A       | RAB11A, member RAS oncogene family                                                       | -0.2727 | 0.0499 |
| 16802204 | ZWILCH       | Zwilch, kinetochore associated, homolog (Drosophila)                                     | -0.3733 | 0.0389 |
| 16802519 | KIF23        | kinesin family member 23                                                                 | -0.6708 | 0.0026 |
| 16802601 |              |                                                                                          | -0.4102 | 0.0337 |
| 16802967 | CCDC33       | coiled-coil domain containing 33                                                         | -0.2189 | 0.0363 |
| 16803018 | ARID3B       | AT rich interactive domain 3B (BRIGHT-like)                                              | -0.3247 | 0.0083 |
| 16803050 | CYP1A2       | cytochrome P450, family 1, subfamily A, polypeptide 2                                    | -0.1764 | 0.0469 |
| 16803251 | UBE2Q2       | ubiquitin-conjugating enzyme E2Q family member 2                                         | -0.4835 | 0.0059 |
| 16803501 | IREB2        | iron-responsive element binding protein 2                                                | -0.3801 | 0.0019 |
| 16803678 |              |                                                                                          | -0.6895 | 0.0072 |
| 16803706 |              |                                                                                          | -0.7802 | 0.0063 |
| 16803743 | FAM108C1     | family with sequence similarity 108, member C1                                           | -0.63   | 0.0083 |
| 16804228 | SCAND2       | SCAN domain containing 2 pseudogene                                                      | -0.4195 | 0.0096 |
| 16804294 | PDE8A        | phosphodiesterase 8A                                                                     | -0.721  | 0      |
| 16804458 | MRPS11       | mitochondrial ribosomal protein S11                                                      | -0.1832 | 0.0312 |
| 16804490 | ISG20        | interferon stimulated exonuclease gene 20kDa                                             | -0.4065 | 0.0005 |
| 16804506 | ACAN         | aggrecan                                                                                 | -0.7932 | 0.0011 |
| 16804559 | FANCI        | Fanconi anemia, complementation group I                                                  | -0.3964 | 0.0485 |
| 16804631 | C15orf42     | chromosome 15 open reading frame 42                                                      | -0.8017 | 0.0011 |
| 16804778 | NGRN         | neugrin, neurite outgrowth associated                                                    | -0.3336 | 0.0227 |
| 16805190 |              |                                                                                          | -0.3309 | 0.0052 |
| 16805218 | LOC100507217 | uncharacterized LOC100507217                                                             | -0.4358 | 0.0066 |
| 16805443 |              |                                                                                          | -0.1888 | 0.0423 |
| 16805555 | LRRC28       | leucine rich repeat containing 28                                                        | -0.2461 | 0.0325 |
| 16805781 |              |                                                                                          | -0.2863 | 0.0487 |
| 16805832 | HERC2P3      | hect domain and RLD 2 pseudogene 3                                                       | -0.3479 | 0.0134 |
| 16805967 | NIPA2        | non imprinted in Prader-Willi/Angelman syndrome 2                                        | -0.3047 | 0.0059 |
| 16806122 | UBE3A        | ubiquitin protein ligase E3A                                                             | -0.2873 | 0.0091 |
| 16806145 | ATP10A       | ATPase, class V, type 10A                                                                | -0.7066 | 0.0254 |
| 16806279 | HERC2        | HECT and RLD domain containing E3 ubiquitin protein ligase 2                             | -0.4672 | 0.0005 |
| 16806561 |              |                                                                                          | -0.3796 | 0.034  |

|          |           |                                                                                          |         |        |
|----------|-----------|------------------------------------------------------------------------------------------|---------|--------|
| 16806732 | WHAMMP1   | WAS protein homolog associated with actin, golgi membranes and microtubules pseudogene 1 | -0.5784 | 0.0062 |
| 16806844 | C15orf29  | chromosome 15 open reading frame 29                                                      | -0.3976 | 0.022  |
| 16807180 |           |                                                                                          | -0.1425 | 0.0178 |
| 16807459 | FAM82A2   | family with sequence similarity 82, member A2                                            | -0.3662 | 0.0013 |
| 16807525 | INO80     | INO80 homolog ( <i>S. cerevisiae</i> )                                                   | -0.3331 | 0      |
| 16807600 |           |                                                                                          | -0.5467 | 0.0049 |
| 16807605 | OIP5      | Opa interacting protein 5                                                                | -0.5705 | 0.0036 |
| 16807683 |           |                                                                                          | -0.2619 | 0.0252 |
| 16807879 | TMEM87A   | transmembrane protein 87A                                                                | -0.395  | 0.003  |
| 16807944 | CDAN1     | codanin 1                                                                                | -0.2881 | 0.0044 |
| 16807976 | TTBK2     | tau tubulin kinase 2                                                                     | -0.3154 | 0.0153 |
| 16807996 | UBR1      | ubiquitin protein ligase E3 component n-recognin 1                                       | -0.5223 | 0.0002 |
| 16808363 | MIR1282   | microRNA 1282                                                                            | -0.3539 | 0.0065 |
| 16808365 | SERINC4   | serine incorporator 4                                                                    | -0.266  | 0.0119 |
| 16808449 |           |                                                                                          | -0.1615 | 0.0091 |
| 16808452 | LOC645212 | uncharacterized LOC645212                                                                | -0.1946 | 0.0162 |
| 16808993 |           |                                                                                          | -0.5425 | 0.0022 |
| 16809093 | GABPB1    | GA binding protein transcription factor, beta subunit 1                                  | -0.1751 | 0.0142 |
| 16809113 |           |                                                                                          | -0.6966 | 0.0178 |
| 16809116 |           |                                                                                          | -0.2721 | 0.0092 |
| 16809138 | TRPM7     | transient receptor potential cation channel, subfamily M, member 7                       | -0.4194 | 0.0107 |
| 16809187 | SPPL2A    | signal peptide peptidase like 2A                                                         | -0.4337 | 0.0043 |
| 16809335 |           |                                                                                          | -0.2886 | 0.0007 |
| 16809340 |           |                                                                                          | -0.5643 | 0.0054 |
| 16809606 | RAB27A    | RAB27A, member RAS oncogene family                                                       | -0.4759 | 0.0082 |
| 16809729 | RFX7      | regulatory factor X, 7                                                                   | -0.4204 | 0.0043 |
| 16809746 |           |                                                                                          | -0.38   | 0.0031 |
| 16809761 | ZNF280D   | zinc finger protein 280D                                                                 | -0.4351 | 0.0031 |
| 16809805 |           |                                                                                          | -0.5728 | 0.0038 |
| 16809880 | ADAM10    | ADAM metallopeptidase domain 10                                                          | -0.3624 | 0.0028 |
| 16809915 | HSP90AB4P | heat shock protein 90kDa alpha (cytosolic), class B member 4, pseudogene                 | -0.326  | 0.0129 |
| 16809919 |           |                                                                                          | -0.4166 | 0.0467 |
| 16809926 |           |                                                                                          | -0.3439 | 0.0415 |
| 16810025 | GTF2A2    | general transcription factor IIA, 2, 12kDa                                               | -0.2039 | 0.0432 |
| 16810040 | BNIP2     | BCL2/adenovirus E1B 19kDa interacting protein 2                                          | -0.3054 | 0.0114 |
| 16810104 | NARG2     | NMDA receptor regulated 2                                                                | -0.2993 | 0.0019 |
| 16810376 | HERC1     | HECT and RLD domain containing E3 ubiquitin protein ligase family member 1               | -0.2668 | 0.0092 |
| 16810514 | PPIB      | peptidylprolyl isomerase B (cyclophilin B)                                               | -0.2996 | 0.0185 |
| 16810543 | KIAA0101  | KIAA0101                                                                                 | -0.583  | 0.0072 |
| 16810559 | CSNK1G1   | casein kinase 1, gamma 1                                                                 | -0.1661 | 0.0072 |
| 16810572 | RBPM52    | RNA binding protein with multiple splicing 2                                             | -0.5953 | 0.0087 |
| 16810585 | PIF1      | PIF1 5'-to-3' DNA helicase homolog ( <i>S. cerevisiae</i> )                              | -0.1679 | 0.0163 |
| 16810686 | CLPX      | ClpX caseinolytic peptidase X homolog ( <i>E. coli</i> )                                 | -0.2991 | 0.0156 |
| 16810765 | IGDCC4    | immunoglobulin superfamily, DCC subclass, member 4                                       | -0.4417 | 0.0054 |
| 16810847 | DENND4A   | DENN/MADD domain containing 4A                                                           | -0.3755 | 0.0122 |
| 16810954 | SNORD18C  | small nucleolar RNA, C/D box 18C                                                         | -0.231  | 0.0159 |
| 16810958 |           |                                                                                          | -0.2534 | 0.0267 |
| 16810959 |           |                                                                                          | -0.3137 | 0.0106 |
| 16810960 |           |                                                                                          | -0.1593 | 0.0498 |
| 16810962 |           |                                                                                          | -0.2105 | 0.0079 |
| 16810963 |           |                                                                                          | -0.2218 | 0.0462 |
| 16810965 |           |                                                                                          | -0.3646 | 0.0118 |
| 16810966 |           |                                                                                          | -0.3598 | 0.0348 |
| 16810967 |           |                                                                                          | -0.4559 | 0.0492 |
| 16810970 | SNORD18C  | small nucleolar RNA, C/D box 18C                                                         | -0.9279 | 0.0003 |
| 16810971 |           |                                                                                          | -0.9279 | 0.0003 |
| 16810974 | SNORD16   | small nucleolar RNA, C/D box 16                                                          | -0.5166 | 0.0018 |

|          |              |                                                                            |         |        |
|----------|--------------|----------------------------------------------------------------------------|---------|--------|
| 16810975 |              |                                                                            | -0.5166 | 0.0018 |
| 16811073 | CLN6         | ceroid-lipofuscinosis, neuronal 6, late infantile, variant                 | -0.3151 | 0.0314 |
| 16811129 | ANP32A       | acidic (leucine-rich) nuclear phosphoprotein 32 family, member A           | -0.4786 | 0      |
| 16811151 | ANP32A-IT1   | ANP32A intronic transcript 1 (non-protein coding)                          | -0.1929 | 0.0223 |
| 16811816 | PTPN9        | protein tyrosine phosphatase, non-receptor type 9                          | -0.4325 | 0.0001 |
| 16812083 | LOC91450     | uncharacterized LOC91450                                                   | -0.217  | 0.0085 |
| 16812171 |              |                                                                            | -0.1992 | 0.0343 |
| 16812350 |              |                                                                            | -0.3844 | 0.0233 |
| 16812732 |              |                                                                            | -0.1943 | 0.0178 |
| 16812735 | LOC100505661 | uncharacterized LOC100505661                                               | -0.4373 | 0.0246 |
| 16812800 |              |                                                                            | -0.2389 | 0.0077 |
| 16812831 | SEC11A       | SEC11 homolog A ( <i>S. cerevisiae</i> )                                   | -0.2235 | 0.0277 |
| 16812994 |              |                                                                            | -0.2161 | 0.04   |
| 16813062 | RLBP1        | retinaldehyde binding protein 1                                            | -0.1701 | 0.029  |
| 16813073 | POLG         | polymerase (DNA directed), gamma                                           | -0.2104 | 0.0205 |
| 16813148 | KIF7         | kinesin family member 7                                                    | -0.193  | 0.0115 |
| 16813189 | PEX11A       | peroxisomal biogenesis factor 11 alpha                                     | -0.3931 | 0.0111 |
| 16813265 |              |                                                                            | -0.3875 | 0.0136 |
| 16813342 | PRC1         | protein regulator of cytokinesis 1                                         | -0.6396 | 0.009  |
| 16813592 |              |                                                                            | -0.1421 | 0.0286 |
| 16813871 | CHSY1        | chondroitin sulfate synthase 1                                             | -0.6004 | 0.0021 |
| 16813883 | VIMP         | VCP-interacting membrane protein                                           | -0.4094 | 0.0005 |
| 16813900 | SNRPA1       | small nuclear ribonucleoprotein polypeptide A'                             | -0.3206 | 0.0034 |
| 16813922 | PCSK6        | proprotein convertase subtilisin/kexin type 6                              | -0.5459 | 0.044  |
| 16814128 | HBA1         | hemoglobin, alpha 1                                                        | -0.6997 | 0.0452 |
| 16814278 | SOLH         | small optic lobes homolog ( <i>Drosophila</i> )                            | -0.1618 | 0.0281 |
| 16814295 | SOLH         | small optic lobes homolog ( <i>Drosophila</i> )                            | -0.193  | 0.0491 |
| 16814748 | CRAMP1L      | Crn, cramped-like ( <i>Drosophila</i> )                                    | -0.1629 | 0.035  |
| 16814779 | HN1L         | hematological and neurological expressed 1-like                            | -0.5153 | 0.001  |
| 16815394 | CASP16       | caspase 16, apoptosis-related cysteine peptidase (putative)                | -0.3244 | 0.0228 |
| 16815905 | RMI2         | RMI2, RecQ mediated genome instability 2, homolog ( <i>S. cerevisiae</i> ) | -0.5304 | 0.0064 |
| 16815910 |              |                                                                            | -0.3068 | 0.0289 |
| 16816948 | HS3ST2       | heparan sulfate (glucosamine) 3-O-sulfotransferase 2                       | -0.3867 | 0.0137 |
| 16817017 | PLK1         | polo-like kinase 1                                                         | -1.0522 | 0.0017 |
| 16817320 | SBK1         | SH3-binding domain kinase 1                                                | -0.4732 | 0.0306 |
| 16817647 | KIF22        | kinesin family member 22                                                   | -0.304  | 0.0306 |
| 16818068 | FBXL19       | F-box and leucine-rich repeat protein 19                                   | -0.1633 | 0.0083 |
| 16818359 | TGFB11       | transforming growth factor beta 1 induced transcript 1                     | -0.7634 | 0.0025 |
| 16818522 | RN5-8S2      | RNA, 5.8S ribosomal 2                                                      | -0.4517 | 0.0075 |
| 16818733 | HEATR3       | HEAT repeat containing 3                                                   | -0.2422 | 0.036  |
| 16819197 | MT4          | metallothionein 4                                                          | -0.1671 | 0.0291 |
| 16819952 | CBFB         | core-binding factor, beta subunit                                          | -0.4033 | 0.0022 |
| 16820157 | HSD11B2      | hydroxysteroid (11-beta) dehydrogenase 2                                   | -0.5066 | 0.0115 |
| 16820296 | EDC4         | enhancer of mRNA decapping 4                                               | -0.213  | 0.0337 |
| 16820333 | NRN1L        | neuritin 1-like                                                            | -0.4339 | 0.0094 |
| 16820843 |              |                                                                            | -0.2611 | 0.0113 |
| 16821045 |              |                                                                            | -0.3277 | 0.0457 |
| 16821326 | PLCG2        | phospholipase C, gamma 2 (phosphatidylinositol-specific)                   | -0.1892 | 0.0153 |
| 16821377 | CDH13        | cadherin 13, H-cadherin (heart)                                            | -0.548  | 0.0045 |
| 16821414 | OSGIN1       | oxidative stress induced growth inhibitor 1                                | -0.5842 | 0.0052 |
| 16821425 | NECAB2       | N-terminal EF-hand calcium binding protein 2                               | -0.2603 | 0.0154 |
| 16821788 |              |                                                                            | -0.6844 | 0.0013 |
| 16821790 | ZNF469       | zinc finger protein 469                                                    | -0.4128 | 0.0322 |
| 16821835 | MGC23284     | uncharacterized LOC197187                                                  | -0.595  | 0.0001 |
| 16821869 | CDT1         | chromatin licensing and DNA replication factor 1                           | -0.2656 | 0.0451 |
| 16822661 | UNKL         | unkempt homolog ( <i>Drosophila</i> )-like                                 | -0.22   | 0.0068 |
| 16822913 | RPS2         | ribosomal protein S2                                                       | -0.2992 | 0.0331 |

|          |              |                                                                               |         |        |
|----------|--------------|-------------------------------------------------------------------------------|---------|--------|
| 16822917 | RPS2         | ribosomal protein S2                                                          | -0.4124 | 0.0424 |
| 16823179 | SRRM2-AS1    | SRRM2 antisense RNA 1 (non-protein coding)                                    | -0.262  | 0.0204 |
| 16823866 | SOCS1        | suppressor of cytokine signaling 1                                            | -0.4635 | 0.0417 |
| 16823889 | MIR548H2     | microRNA 548h-2                                                               | -0.4211 | 0.0097 |
| 16824349 | LOC100288162 | uncharacterized LOC100288162                                                  | -0.1839 | 0.0197 |
| 16824352 | XYLT1        | xylosyltransferase I                                                          | -0.7589 | 0.0018 |
| 16826077 |              |                                                                               | -0.2515 | 0.0289 |
| 16826102 |              |                                                                               | -0.2856 | 0.0133 |
| 16826160 | SHCBP1       | SHC SH2-domain binding protein 1                                              | -0.583  | 0.0474 |
| 16826230 | NETO2        | neuropilin (NRP) and tolloid (TLL)-like 2                                     | -1.2376 | 0.0008 |
| 16826241 |              |                                                                               | -0.742  | 0.0149 |
| 16827502 | SLC12A4      | solute carrier family 12 (potassium/chloride transporters), member 4          | -0.5101 | 0.0278 |
| 16827687 | NOB1         | NIN1/RPN12 binding protein 1 homolog ( <i>S. cerevisiae</i> )                 | -0.434  | 0.0037 |
| 16827735 | LOC400541    | uncharacterized LOC400541                                                     | -0.4188 | 0.0188 |
| 16828153 | TXNL4B       | thioredoxin-like 4B                                                           | -0.3334 | 0.0332 |
| 16828762 | HSDL1        | hydroxysteroid dehydrogenase like 1                                           | -0.4481 | 0.0494 |
| 16828772 | TAF1C        | TATA box binding protein (TBP)-associated factor, RNA polymerase I, C, 110kDa | -0.1887 | 0.0397 |
| 16828921 |              |                                                                               | -0.157  | 0.0099 |
| 16829056 | LOC100653213 | uncharacterized LOC100653213                                                  | -0.2352 | 0.0119 |
| 16829080 |              |                                                                               | -0.2245 | 0.0211 |
| 16829113 |              |                                                                               | -0.1667 | 0.0066 |
| 16829139 | MVD          | mevalonate (diphospho) decarboxylase                                          | -0.7543 | 0.0161 |
| 16829469 |              |                                                                               | -1.1181 | 0.0296 |
| 16829472 | LOC100506388 | uncharacterized LOC100506388                                                  | -0.9883 | 0.0046 |
| 16829486 | FAM57A       | family with sequence similarity 57, member A                                  | -0.7084 | 0.0244 |
| 16829505 |              |                                                                               | -0.5504 | 0.0123 |
| 16829638 | SGSM2        | small G protein signaling modulator 2                                         | -0.2931 | 0.0246 |
| 16829764 | GSG2         | germ cell associated 2 (haspin)                                               | -0.4071 | 0.02   |
| 16830295 | SLC16A13     | solute carrier family 16, member 13 (monocarboxylic acid transporter 13)      | -0.4496 | 0.0407 |
| 16830575 | SNORD10      | small nucleolar RNA, C/D box 10                                               | -0.7567 | 0.0094 |
| 16830988 | NDEL1        | nudE nuclear distribution E homolog ( <i>A. nidulans</i> )-like 1             | -0.5957 | 0.0009 |
| 16831383 | ADORA2B      | adenosine A2b receptor                                                        | -0.2685 | 0.0378 |
| 16831464 | C17orf76-AS1 | C17orf76 antisense RNA 1 (non-protein coding)                                 | -0.2378 | 0.0387 |
| 16831598 | NT5M         | 5',3'-nucleotidase, mitochondrial                                             | -0.1934 | 0.0203 |
| 16832133 |              |                                                                               | -0.3416 | 0.0276 |
| 16832138 |              |                                                                               | -0.423  | 0.0064 |
| 16832142 |              |                                                                               | -0.7627 | 0.0114 |
| 16832221 |              |                                                                               | -0.1793 | 0.0027 |
| 16832231 |              |                                                                               | -0.8974 | 0.0157 |
| 16832405 | NLK          | nemo-like kinase                                                              | -0.6902 | 0.0091 |
| 16832421 |              |                                                                               | -0.759  | 0.0119 |
| 16832429 | TMEM97       | transmembrane protein 97                                                      | -1.0947 | 0.0057 |
| 16832438 | TNFAIP1      | tumor necrosis factor, alpha-induced protein 1 (endothelial)                  | -0.3502 | 0.0266 |
| 16832510 | SPAG5-AS1    | SPAG5 antisense RNA 1 (non-protein coding)                                    | -0.1715 | 0.0249 |
| 16832558 | SNORD4A      | small nucleolar RNA, C/D box 4A                                               | -0.3045 | 0.0242 |
| 16833032 |              |                                                                               | -0.1688 | 0.0439 |
| 16833139 | PSMD11       | proteasome (prosome, macropain) 26S subunit, non-ATPase, 11                   | -0.2769 | 0.0247 |
| 16833545 | TADA2A       | transcriptional adaptor 2A                                                    | -0.3223 | 0.0188 |
| 16833567 | DUSP14       | dual specificity phosphatase 14                                               | -0.3151 | 0.0384 |
| 16833616 | SOCS7        | suppressor of cytokine signaling 7                                            | -0.5782 | 0.0015 |
| 16833802 | STARD3       | StAR-related lipid transfer (START) domain containing 3                       | -0.3457 | 0.0155 |
| 16834056 | CDC6         | cell division cycle 6 homolog ( <i>S. cerevisiae</i> )                        | -0.5982 | 0.0124 |
| 16834196 | FKBP10       | FK506 binding protein 10, 65 kDa                                              | -0.4955 | 0.0305 |
| 16834252 | NKIRAS2      | NFKB inhibitor interacting Ras-like 2                                         | -0.2818 | 0.0298 |
| 16834341 | HSD17B1      | hydroxysteroid (17-beta) dehydrogenase 1                                      | -0.2164 | 0.0221 |
| 16834516 | AOC3         | amine oxidase, copper containing 3 (vascular adhesion protein 1)              | -1.2371 | 0.0025 |

|          |              |                                                                             |         |        |
|----------|--------------|-----------------------------------------------------------------------------|---------|--------|
| 16834523 | AOC4         | amine oxidase, copper containing 3 (vascular adhesion protein 1) pseudogene | -0.247  | 0.0321 |
| 16834540 | RPL27        | ribosomal protein L27                                                       | -0.1556 | 0.0461 |
| 16834541 |              |                                                                             | -0.255  | 0.0029 |
| 16834543 |              |                                                                             | -0.1669 | 0.0452 |
| 16834764 |              |                                                                             | -0.4193 | 0.0002 |
| 16835158 | ITGB3        | integrin, beta 3 (platelet glycoprotein IIIa, antigen CD61)                 | -0.3032 | 0.0161 |
| 16835538 |              |                                                                             | -0.2497 | 0.0498 |
| 16835797 | EME1         | essential meiotic endonuclease 1 homolog 1 (S. pombe)                       | -0.2301 | 0.0237 |
| 16836375 | MSI2         | musashi homolog 2 (Drosophila)                                              | -0.6811 | 0.0002 |
| 16836476 | PPM1E        | protein phosphatase, Mg2+/Mn2+ dependent, 1E                                | -0.6681 | 0.0045 |
| 16836487 |              |                                                                             | -0.1991 | 0.0482 |
| 16836492 | PRR11        | proline rich 11                                                             | -0.9974 | 0.0009 |
| 16837061 | SNORD104     | small nucleolar RNA, C/D box 104                                            | -0.8165 | 0.0342 |
| 16837270 | KPNA2        | karyopherin alpha 2 (RAG cohort 1, importin alpha 1)                        | -0.7173 | 0.0022 |
| 16837284 | LOC100499466 | uncharacterized LOC100499466                                                | -0.2583 | 0.0226 |
| 16837604 |              |                                                                             | -0.1203 | 0.0391 |
| 16837762 | LOC100287042 | uncharacterized LOC100287042                                                | -0.2705 | 0.0309 |
| 16837768 | KIAA0195     | KIAA0195                                                                    | -0.5644 | 0.0005 |
| 16838101 | SNORD1B      | small nucleolar RNA, C/D box 1B                                             | -0.369  | 0.0185 |
| 16838105 |              |                                                                             | -0.5662 | 0.0001 |
| 16838107 | METTL23      | methyltransferase like 23                                                   | -0.2998 | 0.0409 |
| 16838169 | LINC00338    | long intergenic non-protein coding RNA 338                                  | -0.3348 | 0.0215 |
| 16838359 | BIRC5        | baculoviral IAP repeat containing 5                                         | -0.7342 | 0.0065 |
| 16838382 |              |                                                                             | -0.1957 | 0.0122 |
| 16838561 | SLC26A11     | solute carrier family 26, member 11                                         | -0.3637 | 0.0369 |
| 16838698 | RPTOR        | regulatory associated protein of MTOR, complex 1                            | -0.6618 | 0.0004 |
| 16839086 | FOXK2        | forkhead box K2                                                             | -0.4136 | 0.005  |
| 16839104 |              |                                                                             | -0.3479 | 0.0255 |
| 16839220 | FAM101B      | family with sequence similarity 101, member B                               | -0.5339 | 0.0398 |
| 16839294 | ABR          | active BCR-related                                                          | -0.6765 | 0.0266 |
| 16839473 | PRPF8        | PRP8 pre-mRNA processing factor 8 homolog (S. cerevisiae)                   | -0.2645 | 0.0488 |
| 16839474 |              |                                                                             | -0.3068 | 0.0287 |
| 16839481 |              |                                                                             | -0.3623 | 0.0351 |
| 16839485 |              |                                                                             | -0.9315 | 0.0008 |
| 16839486 |              |                                                                             | -0.4725 | 0.002  |
| 16839487 |              |                                                                             | -0.4951 | 0.0148 |
| 16839488 |              |                                                                             | -0.6901 | 0.0022 |
| 16839489 |              |                                                                             | -0.4344 | 0.0299 |
| 16839497 |              |                                                                             | -0.2789 | 0.036  |
| 16839502 |              |                                                                             | -0.3038 | 0.0431 |
| 16839515 |              |                                                                             | -0.4113 | 0.0221 |
| 16839516 |              |                                                                             | -0.3383 | 0.0227 |
| 16839602 | SNORD91B     | small nucleolar RNA, C/D box 91B                                            | -0.198  | 0.0186 |
| 16839639 |              |                                                                             | -0.2948 | 0.0143 |
| 16839836 | C17orf85     | chromosome 17 open reading frame 85                                         | -0.2664 | 0.0419 |
| 16839913 | ZZEF1        | zinc finger, ZZ-type with EF-hand domain 1                                  | -0.2828 | 0.0322 |
| 16840262 | NUP88        | nucleoporin 88kDa                                                           | -0.3426 | 0.0097 |
| 16840846 | PER1         | period homolog 1 (Drosophila)                                               | -0.3223 | 0.043  |
| 16840902 | AURKB        | aurora kinase B                                                             | -0.4308 | 0.0112 |
| 16841038 | CCDC42       | coiled-coil domain containing 42                                            | -0.1572 | 0.0177 |
| 16841340 | MYH2         | myosin, heavy chain 2, skeletal muscle, adult                               | -0.2482 | 0.0379 |
| 16841577 | MIR4731      | microRNA 4731                                                               | -0.5729 | 0.0002 |
| 16841778 | FAM211A      | family with sequence similarity 211, member A                               | -0.3242 | 0.0274 |
| 16841849 | MPRIP-AS1    | MPRIP antisense RNA 1 (non-protein coding)                                  | -0.3183 | 0.0097 |
| 16841982 | TOM1L2       | target of myb1-like 2 (chicken)                                             | -0.2928 | 0.0163 |
| 16842206 | GRAP         | GRB2-related adaptor protein                                                | -0.179  | 0.0466 |
| 16842217 |              |                                                                             | -0.5308 | 0.045  |
| 16842292 |              |                                                                             | -1.5569 | 0.0011 |

|          |          |                                                                                                             |         |        |
|----------|----------|-------------------------------------------------------------------------------------------------------------|---------|--------|
| 16842458 |          |                                                                                                             | -0.366  | 0.0163 |
| 16842659 | ALDOC    | aldolase C, fructose-bisphosphate                                                                           | -0.76   | 0.0098 |
| 16842673 | SPAG5    | sperm associated antigen 5                                                                                  | -0.6075 | 0.0206 |
| 16842701 | SGK494   | uncharacterized serine/threonine-protein kinase SgK494                                                      | -0.253  | 0.0431 |
| 16842722 | KIAA0100 | KIAA0100                                                                                                    | -0.47   | 0.0062 |
| 16842766 | SDF2     | stromal cell-derived factor 2                                                                               | -0.3206 | 0.0397 |
| 16842812 | TLCD1    | TLC domain containing 1                                                                                     | -0.6443 | 0.0175 |
| 16843680 | MYO19    | myosin XIX                                                                                                  | -0.53   | 0.0001 |
| 16843987 | PCGF2    | polycomb group ring finger 2                                                                                | -0.375  | 0.019  |
| 16844099 | CACNB1   | calcium channel, voltage-dependent, beta 1 subunit                                                          | -0.2911 | 0.0026 |
| 16844305 |          |                                                                                                             | -0.4003 | 0.0355 |
| 16844312 | TOP2A    | topoisomerase (DNA) II alpha 170kDa                                                                         | -1.3492 | 0.0044 |
| 16844817 | KRT16    | keratin 16                                                                                                  | -0.1567 | 0.021  |
| 16844894 | LEPREL4  | leprecan-like 4                                                                                             | -0.2795 | 0.0259 |
| 16844936 | ACLY     | ATP citrate lyase                                                                                           | -0.4476 | 0.0398 |
| 16845169 | HSD17B1  | hydroxysteroid (17-beta) dehydrogenase 1                                                                    | -0.4324 | 0.0257 |
| 16845172 | PSMC3IP  | PSMC3 interacting protein                                                                                   | -0.2204 | 0.0372 |
| 16845452 | MPP3     | membrane protein, palmitoylated 3 (MAGUK p55 subfamily member 3)                                            | -0.258  | 0.0319 |
| 16845623 | SLC4A1   | solute carrier family 4, anion exchanger, member 1 (erythrocyte membrane protein band 3, Diego blood group) | -0.2579 | 0.0091 |
| 16845657 | SLC25A39 | solute carrier family 25, member 39                                                                         | -0.4268 | 0.0005 |
| 16845736 | GJC1     | gap junction protein, gamma 1, 45kDa                                                                        | -0.5909 | 0.0201 |
| 16845794 | KIF18B   | kinesin family member 18B                                                                                   | -0.3726 | 0.0193 |
| 16846226 | HOXB3    | homeobox B3                                                                                                 | -0.2872 | 0.015  |
| 16846291 | HOXB9    | homeobox B9                                                                                                 | -0.5638 | 0.0085 |
| 16846359 |          |                                                                                                             | -0.4182 | 0.0168 |
| 16846587 | COL1A1   | collagen, type I, alpha 1                                                                                   | -0.5878 | 0.0275 |
| 16846672 |          |                                                                                                             | -0.2197 | 0.0262 |
| 16847238 | SKA2     | spindle and kinetochore associated complex subunit 2                                                        | -0.2868 | 0.0357 |
| 16847621 | FTSJ3    | FtsJ homolog 3 (E. coli)                                                                                    | -0.3969 | 0.0265 |
| 16847771 | ERN1     | endoplasmic reticulum to nucleus signaling 1                                                                | -0.6185 | 0.0195 |
| 16848657 | FDXR     | ferredoxin reductase                                                                                        | -0.2596 | 0.0317 |
| 16849172 | QRICH2   | glutamine rich 2                                                                                            | -0.2166 | 0.0183 |
| 16849306 |          |                                                                                                             | -0.7427 | 0.0346 |
| 16849308 | JMJD6    | jumonji domain containing 6                                                                                 | -0.2587 | 0.0424 |
| 16849379 | TK1      | thymidine kinase 1, soluble                                                                                 | -0.6213 | 0.0074 |
| 16849646 |          |                                                                                                             | -0.1256 | 0.0371 |
| 16849667 | EIF4A3   | eukaryotic translation initiation factor 4A3                                                                | -0.6405 | 0.0006 |
| 16849712 | FLJ46026 | FLJ46026 protein                                                                                            | -0.2841 | 0.0319 |
| 16849773 | C17orf56 | chromosome 17 open reading frame 56                                                                         | -0.2129 | 0.0137 |
| 16849913 | ARL16    | ADP-ribosylation factor-like 16                                                                             | -0.2902 | 0.0259 |
| 16849939 | P4HB     | prolyl 4-hydroxylase, beta polypeptide                                                                      | -0.3232 | 0.005  |
| 16849982 | ALYREF   | Aly/REF export factor                                                                                       | -0.3044 | 0.0338 |
| 16850090 | DUS1L    | dihydrouridine synthase 1-like (S. cerevisiae)                                                              | -0.2255 | 0.047  |
| 16850107 | FASN     | fatty acid synthase                                                                                         | -0.7466 | 0.0026 |
| 16850264 | WDR45L   | WDR45-like                                                                                                  | -0.321  | 0.014  |
| 16850286 | MIR4525  | microRNA 4525                                                                                               | -0.2587 | 0.0429 |
| 16850416 |          |                                                                                                             | -0.1543 | 0.0362 |
| 16850426 |          |                                                                                                             | -0.4696 | 0.0341 |
| 16850477 | TYMS     | thymidylate synthetase                                                                                      | -0.9517 | 0.0022 |
| 16850517 | NDC80    | NDC80 kinetochore complex component homolog (S. cerevisiae)                                                 | -1.1793 | 0.0023 |
| 16850625 | TGIF1    | TGFB-induced factor homeobox 1                                                                              | -0.3075 | 0.0093 |
| 16850944 | VAPA     | VAMP (vesicle-associated membrane protein)-associated protein A, 33kDa                                      | -0.2174 | 0.0487 |
| 16851081 | TUBB6    | tubulin, beta 6 class V                                                                                     | -0.3925 | 0.0469 |
| 16851191 | C18orf1  | chromosome 18 open reading frame 1                                                                          | -0.3755 | 0.0244 |
| 16851206 | RNMT     | RNA (guanine-7-) methyltransferase                                                                          | -0.3174 | 0.0425 |
| 16851254 |          |                                                                                                             | -0.5938 | 0.0224 |



|          |              |                                                                  |         |        |
|----------|--------------|------------------------------------------------------------------|---------|--------|
| 16851443 | RIOK3        | RIO kinase 3 (yeast)                                             | -0.4103 | 0.017  |
| 16851688 |              |                                                                  | -0.7488 | 0.0112 |
| 16851786 | TTR          | transthyretin                                                    | -0.1197 | 0.0037 |
| 16852008 | MOCOS        | molybdenum cofactor sulfuryase                                   | -0.6049 | 0.0003 |
| 16852098 | PIK3C3       | phosphoinositide-3-kinase, class 3                               | -0.3058 | 0.0123 |
| 16852312 | SKA1         | spindle and kinetochore associated complex subunit 1             | -0.718  | 0.025  |
| 16852568 |              |                                                                  | -0.3868 | 0.0243 |
| 16852692 |              |                                                                  | -0.3983 | 0.0165 |
| 16852773 | ZCCHC2       | zinc finger, CCHC domain containing 2                            | -0.3828 | 0.0001 |
| 16852833 | SERPINB13    | serpin peptidase inhibitor, clade B (ovalbumin), member 13       | -0.122  | 0.0215 |
| 16852993 |              |                                                                  | -0.1282 | 0.035  |
| 16853120 | TSHZ1        | teashirt zinc finger homeobox 1                                  | -0.2575 | 0.0271 |
| 16853234 | ATP9B        | ATPase, class II, type 9B                                        | -0.3043 | 0.0185 |
| 16853527 | MYOM1        | myomesin 1, 185kDa                                               | -0.367  | 0.0156 |
| 16853994 |              |                                                                  | -0.7527 | 0.0144 |
| 16853996 | AFG3L2       | AFG3 ATPase family gene 3-like 2 ( <i>S. cerevisiae</i> )        | -0.4599 | 0.0014 |
| 16854044 |              |                                                                  | -0.3943 | 0.022  |
| 16854046 | CEP76        | centrosomal protein 76kDa                                        | -0.5715 | 0.0007 |
| 16854097 | MC2R         | melanocortin 2 receptor (adrenocorticotrophic hormone)           | -2.6042 | 0      |
| 16854130 |              |                                                                  | -0.2043 | 0.0416 |
| 16854185 | ESCO1        | establishment of cohesion 1 homolog 1 ( <i>S. cerevisiae</i> )   | -0.3039 | 0.0428 |
| 16854227 | LOC100128893 | uncharacterized LOC100128893                                     | -0.4244 | 0.0145 |
| 16854268 | NPC1         | Niemann-Pick disease, type C1                                    | -0.5871 | 0.0163 |
| 16854375 | SS18         | synovial sarcoma translocation, chromosome 18                    | -0.5023 | 0.0077 |
| 16854437 | CDH2         | cadherin 2, type 1, N-cadherin (neuronal)                        | -1.3336 | 0.0286 |
| 16854664 |              |                                                                  | -0.1805 | 0.0239 |
| 16855015 | ST8SIA5      | ST8 alpha-N-acetyl-neuraminide alpha-2,8-sialyltransferase 5     | -0.5939 | 0.0484 |
| 16855093 | SMAD2        | SMAD family member 2                                             | -0.3733 | 0.027  |
| 16855163 | RPL17        | ribosomal protein L17                                            | -0.2446 | 0.0193 |
| 16855171 |              |                                                                  | -0.3735 | 0.0166 |
| 16855172 |              |                                                                  | -0.2388 | 0.0068 |
| 16855256 | MBD1         | methyl-CpG binding domain protein 1                              | -0.2375 | 0.0457 |
| 16855629 | RNF152       | ring finger protein 152                                          | -0.5276 | 0.0423 |
| 16855723 | SERPINB3     | serpin peptidase inhibitor, clade B (ovalbumin), member 3        | -0.1554 | 0.0321 |
| 16855999 | ZADH2        | zinc binding alcohol dehydrogenase domain containing 2           | -0.3548 | 0.005  |
| 16856015 |              |                                                                  | -0.1733 | 0.0444 |
| 16856021 |              |                                                                  | -0.1919 | 0.0335 |
| 16856101 |              |                                                                  | -0.2064 | 0.0017 |
| 16856130 |              |                                                                  | -0.3949 | 0.0178 |
| 16856567 | DAZAP1       | DAZ associated protein 1                                         | -0.1896 | 0.0365 |
| 16856634 | LOC100288123 | uncharacterized LOC100288123                                     | -0.2597 | 0.0313 |
| 16856699 | DOT1L        | DOT1-like, histone H3 methyltransferase ( <i>S. cerevisiae</i> ) | -0.4356 | 0.0176 |
| 16856757 | OAZ1         | ornithine decarboxylase antizyme 1                               | -0.1943 | 0.0456 |
| 16856910 | NCLN         | nicalin                                                          | -0.4237 | 0.0231 |
| 16857080 | PIAS4        | protein inhibitor of activated STAT, 4                           | -0.2993 | 0.0028 |
| 16857143 | CCDC94       | coiled-coil domain containing 94                                 | -0.2161 | 0.0113 |
| 16857192 | CHAF1A       | chromatin assembly factor 1, subunit A (p150)                    | -0.3495 | 0.0471 |
| 16857254 | FEM1A        | fem-1 homolog a ( <i>C. elegans</i> )                            | -0.3068 | 0.0034 |
| 16857258 | UHRF1        | ubiquitin-like with PHD and ring finger domains 1                | -0.2171 | 0.0351 |
| 16857282 | KDM4B        | lysine (K)-specific demethylase 4B                               | -0.7295 | 0.0003 |
| 16857353 | RPL36        | ribosomal protein L36                                            | -0.2384 | 0.0111 |
| 16857389 | NRTN         | neurturin                                                        | -0.4161 | 0.017  |
| 16857457 |              |                                                                  | -0.8043 | 0.0111 |
| 16857886 | ANGPTL4      | angiopoietin-like 4                                              | -0.2954 | 0.0238 |
| 16857931 |              |                                                                  | -0.5916 | 0.0168 |
| 16858235 | ILF3         | interleukin enhancer binding factor 3, 90kDa                     | -0.2193 | 0.0215 |
| 16858386 | LDLR         | low density lipoprotein receptor                                 | -1.0738 | 0.004  |

|          |              |                                                                                  |         |        |
|----------|--------------|----------------------------------------------------------------------------------|---------|--------|
| 16858496 | CNN1         | calponin 1, basic, smooth muscle                                                 | -0.3439 | 0.0268 |
| 16858820 |              |                                                                                  | -0.2592 | 0.0129 |
| 16858970 | CD97         | CD97 molecule                                                                    | -0.8737 | 0.0253 |
| 16859314 | KLF2         | Kruppel-like factor 2 (lung)                                                     | -0.3948 | 0.0261 |
| 16859395 | MYO9B        | myosin IXB                                                                       | -0.3285 | 0.0255 |
| 16859648 | RPL18A       | ribosomal protein L18a                                                           | -0.2267 | 0.0464 |
| 16859822 |              |                                                                                  | -0.1761 | 0.0114 |
| 16859825 | UBA52        | ubiquitin A-52 residue ribosomal protein fusion product 1                        | -0.1353 | 0.0291 |
| 16860041 | MIR640       | microRNA 640                                                                     | -0.266  | 0.0092 |
| 16860450 | ZNF536       | zinc finger protein 536                                                          | -0.5903 | 0.0128 |
| 16860610 | WDR88        | WD repeat domain 88                                                              | -0.1184 | 0.0369 |
| 16860667 | KCTD15       | potassium channel tetramerisation domain containing 15                           | -0.2402 | 0.0081 |
| 16860766 | WTIP         | Wilms tumor 1 interacting protein                                                | -0.1894 | 0.0171 |
| 16861395 |              |                                                                                  | -0.2973 | 0.0475 |
| 16861887 | ECH1         | enoyl CoA hydratase 1, peroxisomal                                               | -0.2903 | 0.0419 |
| 16861969 | SAMD4B       | sterile alpha motif domain containing 4B                                         | -0.1759 | 0.029  |
| 16862101 | LGALS13      | lectin, galactoside-binding, soluble, 13                                         | -0.2394 | 0.0451 |
| 16862132 | LGALS14      | lectin, galactoside-binding, soluble, 14                                         | -0.2112 | 0.0259 |
| 16862284 | LTBP4        | latent transforming growth factor beta binding protein 4                         | -0.2722 | 0.0365 |
| 16862572 | CEACAM3      | carcinoembryonic antigen-related cell adhesion molecule 3                        | -0.1957 | 0.0184 |
| 16862596 | RPS19        | ribosomal protein S19                                                            | -0.1941 | 0.036  |
| 16862666 | LOC100132272 | uncharacterized LOC100132272                                                     | -0.2923 | 0.0322 |
| 16862767 |              |                                                                                  | -0.1797 | 0.0208 |
| 16862996 | PVR          | poliovirus receptor                                                              | -0.323  | 0.0341 |
| 16863011 | CEACAM19     | carcinoembryonic antigen-related cell adhesion molecule 19                       | -0.3054 | 0.0223 |
| 16863104 | TOMM40       | translocase of outer mitochondrial membrane 40 homolog (yeast)                   | -0.4472 | 0.0022 |
| 16863148 | CLPTM1       | cleft lip and palate associated transmembrane protein 1                          | -0.2575 | 0.0314 |
| 16863287 | FOSB         | FBJ murine osteosarcoma viral oncogene homolog B                                 | -0.5528 | 0.0225 |
| 16863489 | LOC400707    | uncharacterized LOC400707                                                        | -0.5278 | 0.0204 |
| 16863513 |              |                                                                                  | -0.2382 | 0.0337 |
| 16863740 | ZNF114       | zinc finger protein 114                                                          | -0.3024 | 0.0315 |
| 16863768 | GRIN2D       | glutamate receptor, ionotropic, N-methyl D-aspartate 2D                          | -0.2872 | 0.0226 |
| 16864159 | RPS11        | ribosomal protein S11                                                            | -0.104  | 0.0477 |
| 16864161 |              |                                                                                  | -0.1247 | 0.0363 |
| 16864162 |              |                                                                                  | -0.1046 | 0.0319 |
| 16864164 |              |                                                                                  | -0.1514 | 0.0276 |
| 16864565 | SNAR-F       | small ILF3/NF90-associated RNA F                                                 | -0.9324 | 0.0411 |
| 16864778 | PPP2R1A      | protein phosphatase 2, regulatory subunit A, alpha                               | -0.4473 | 0.0027 |
| 16865028 | MIR520F      | microRNA 520f                                                                    | -0.4844 | 0.0312 |
| 16865116 | MYADM        | myeloid-associated differentiation marker                                        | -0.6432 | 0.0003 |
| 16865214 | CNOT3        | CCR4-NOT transcription complex, subunit 3                                        | -0.2854 | 0.0168 |
| 16865522 | KIR2DS4      | killer cell immunoglobulin-like receptor, two domains, short cytoplasmic tail, 4 | -0.2556 | 0.0242 |
| 16865620 | BRSK1        | BR serine/threonine kinase 1                                                     | -0.3217 | 0.004  |
| 16865647 | SUV420H2     | suppressor of variegation 4-20 homolog 2 (Drosophila)                            | -0.1343 | 0.046  |
| 16865675 | RPL28        | ribosomal protein L28                                                            | -0.2882 | 0.0307 |
| 16865676 |              |                                                                                  | -0.3421 | 0.007  |
| 16865681 |              |                                                                                  | -0.7373 | 0.0001 |
| 16865772 |              |                                                                                  | -0.4328 | 0.0093 |
| 16865957 | MIMT1        | MER1 repeat containing imprinted transcript 1 (non-protein coding)               | -0.5604 | 0.012  |
| 16866284 |              |                                                                                  | -0.292  | 0.0387 |
| 16866285 |              |                                                                                  | -0.2272 | 0.05   |
| 16866632 | CIRBP-AS1    | CIRBP antisense RNA 1 (non-protein coding)                                       | -0.2799 | 0.0041 |
| 16866794 | REXO1        | REX1, RNA exonuclease 1 homolog (S. cerevisiae)                                  | -0.2584 | 0.0243 |
| 16866946 | TIMM13       | translocase of inner mitochondrial membrane 13 homolog (yeast)                   | -0.3469 | 0.0027 |

|          |           |                                                                              |         |        |
|----------|-----------|------------------------------------------------------------------------------|---------|--------|
| 16867018 | TLE2      | transducin-like enhancer of split 2 (E(sp1) homolog, Drosophila)             | -0.2398 | 0.0329 |
| 16867074 | MFSD12    | major facilitator superfamily domain containing 12                           | -0.41   | 0.0108 |
| 16867088 | TBXA2R    | thromboxane A2 receptor                                                      | -0.9362 | 0.0007 |
| 16867541 | DUS3L     | dihydrouridine synthase 3-like (S. cerevisiae)                               | -0.2564 | 0.0046 |
| 16867579 | FUT5      | fucosyltransferase 5 (alpha (1,3) fucosyltransferase)                        | -0.4025 | 0.0024 |
| 16867583 | NDUFA11   | NADH dehydrogenase (ubiquinone) 1 alpha subcomplex, 11, 14.7kDa              | -0.3498 | 0.0011 |
| 16867756 | TUBB4A    | tubulin, beta 4A class IVa                                                   | -0.7693 | 0.0078 |
| 16868063 | FBN3      | fibrillin 3                                                                  | -0.1905 | 0.0397 |
| 16868472 | FBXL12    | F-box and leucine-rich repeat protein 12                                     | -0.2398 | 0.0234 |
| 16868811 | LOC147727 | uncharacterized LOC147727                                                    | -0.4639 | 0.0026 |
| 16868838 | SPC24     | SPC24, NDC80 kinetochore complex component, homolog (S. cerevisiae)          | -0.2104 | 0.049  |
| 16869397 | TRMT1     | tRNA methyltransferase 1 homolog (S. cerevisiae)                             | -0.2613 | 0.0026 |
| 16869588 | ASF1B     | ASF1 anti-silencing function 1 homolog B (S. cerevisiae)                     | -0.6753 | 0.0033 |
| 16869624 | DDX39A    | DEAD (Asp-Glu-Ala-Asp) box polypeptide 39A                                   | -0.5266 | 0.0018 |
| 16869942 | CYP4F2    | cytochrome P450, family 4, subfamily F, polypeptide 2                        | -0.2153 | 0.0294 |
| 16870131 | HAUS8     | HAUS augmin-like complex, subunit 8                                          | -0.853  | 0      |
| 16870617 | SUGP1     | SURP and G patch domain containing 1                                         | -0.5295 | 0.0002 |
| 16870690 | ATP13A1   | ATPase type 13A1                                                             | -0.1835 | 0.0224 |
| 16870978 | ZNF675    | zinc finger protein 675                                                      | -0.7465 | 0.0281 |
| 16871082 |           |                                                                              | -0.2266 | 0.0021 |
| 16871359 | DMKN      | dermokine                                                                    | -0.5721 | 0.0211 |
| 16872229 | RPS16     | ribosomal protein S16                                                        | -0.1295 | 0.0317 |
| 16872352 | AKT2      | v-akt murine thymoma viral oncogene homolog 2                                | -0.2038 | 0.0131 |
| 16872496 | C19orf54  | chromosome 19 open reading frame 54                                          | -0.379  | 0.0075 |
| 16872990 | PHLDB3    | pleckstrin homology-like domain, family B, member 3                          | -0.188  | 0.0415 |
| 16873239 | TRAPPC6A  | trafficking protein particle complex 6A                                      | -0.4099 | 0.0444 |
| 16873329 | FOSB      | FBJ murine osteosarcoma viral oncogene homolog B                             | -0.8731 | 0.0109 |
| 16873557 | PNMAL2    | paraneoplastic Ma antigen family-like 2                                      | -0.6161 | 0.0207 |
| 16873918 | CCDC114   | coiled-coil domain containing 114                                            | -0.1152 | 0.0307 |
| 16873987 | RPL18     | ribosomal protein L18                                                        | -0.1874 | 0.0217 |
| 16873991 |           |                                                                              | -0.2613 | 0.0301 |
| 16873998 |           |                                                                              | -0.2845 | 0.0089 |
| 16874198 | CGB8      | chorionic gonadotropin, beta polypeptide 8                                   | -0.2311 | 0.0209 |
| 16875042 |           |                                                                              | -0.234  | 0.0264 |
| 16875237 |           |                                                                              | -0.7522 | 0.001  |
| 16875656 | PTPRH     | protein tyrosine phosphatase, receptor type, H                               | -0.7865 | 0      |
| 16875808 | NLRP9     | NLR family, pyrin domain containing 9                                        | -0.134  | 0.0201 |
| 16875909 | PEG3      | paternally expressed 3                                                       | -0.8231 | 0.0145 |
| 16876139 |           |                                                                              | -0.362  | 0.0014 |
| 16876330 |           |                                                                              | -0.2611 | 0.0113 |
| 16876440 | ACP1      | acid phosphatase 1, soluble                                                  | -0.5469 | 0.0001 |
| 16876458 |           |                                                                              | -0.7572 | 0.0108 |
| 16876819 |           |                                                                              | -0.3156 | 0.0078 |
| 16876950 | TAF1B     | TATA box binding protein (TBP)-associated factor, RNA polymerase I, B, 63kDa | -0.2863 | 0.0356 |
| 16877048 | HPCAL1    | hippocalcin-like 1                                                           | -0.1936 | 0.018  |
| 16877543 |           |                                                                              | -0.2442 | 0.0353 |
| 16877555 | RHOB      | ras homolog family member B                                                  | -0.2717 | 0.0332 |
| 16877559 |           |                                                                              | -0.484  | 0.0265 |
| 16877600 |           |                                                                              | -0.1745 | 0.0017 |
| 16877637 | UBXN2A    | UBX domain protein 2A                                                        | -0.2903 | 0.0296 |
| 16877667 | FKBP1B    | FK506 binding protein 1B, 12.6 kDa                                           | -0.2543 | 0.02   |
| 16877762 | CENPO     | centromere protein O                                                         | -0.4773 | 0.0105 |
| 16877888 | EPT1      | ethanolaminophosphotransferase 1 (CDP-ethanolamine-specific)                 | -0.4067 | 0.024  |
| 16878800 | BIRC6     | baculoviral IAP repeat containing 6                                          | -0.3374 | 0.0085 |
| 16878888 | MIR558    | microRNA 558                                                                 | -0.3559 | 0.0244 |
| 16878947 | LTBP1     | latent transforming growth factor beta binding protein 1                     | -0.8909 | 0.0179 |

|          |              |                                                                              |         |        |
|----------|--------------|------------------------------------------------------------------------------|---------|--------|
| 16879174 | QPCT         | glutaminy-peptide cyclotransferase                                           | -0.954  | 0.033  |
| 16879189 |              |                                                                              | -0.362  | 0.0464 |
| 16879202 |              |                                                                              | -0.1282 | 0.0261 |
| 16879205 | FAM82A1      | family with sequence similarity 82, member A1                                | -0.6264 | 0.0182 |
| 16879439 |              |                                                                              | -0.7446 | 0.0045 |
| 16879923 | MSH6         | mutS homolog 6 (E. coli)                                                     | -0.4925 | 0.0019 |
| 16880080 | LOC100506338 | uncharacterized LOC100506338                                                 | -0.3507 | 0.0236 |
| 16880176 | EML6         | echinoderm microtubule associated protein like 6                             | -0.9399 | 0.0175 |
| 16880245 | PRORS1P      | prolyl-tRNA synthetase associated domain containing 1, pseudogene            | -0.3171 | 0.0431 |
| 16880251 |              |                                                                              | -0.4287 | 0.0046 |
| 16880538 | EHBP1        | EH domain binding protein 1                                                  | -0.4113 | 0.0367 |
| 16880669 | LGALS        | lectin, galactoside-binding-like                                             | -0.4551 | 0.0187 |
| 16880712 | SLC1A4       | solute carrier family 1 (glutamate/neutral amino acid transporter), member 4 | -0.7722 | 0.0011 |
| 16881031 | ANTXR1       | anthrax toxin receptor 1                                                     | -0.5359 | 0.0249 |
| 16881059 | MIR3126      | microRNA 3126                                                                | -0.2702 | 0.0101 |
| 16881138 | MXD1         | MAX dimerization protein 1                                                   | -0.4262 | 0.0065 |
| 16881194 | VAX2         | ventral anterior homeobox 2                                                  | -0.2683 | 0.0464 |
| 16882150 | KCMF1        | potassium channel modulatory factor 1                                        | -0.2593 | 0.0313 |
| 16882366 |              |                                                                              | -0.4802 | 0.0222 |
| 16882507 | RGPD2        | RANBP2-like and GRIP domain containing 2                                     | -0.2291 | 0.0311 |
| 16882544 | ANAPC1       | anaphase promoting complex subunit 1                                         | -0.4102 | 0.0283 |
| 16882558 |              |                                                                              | -0.1547 | 0.0072 |
| 16882561 | LOC541471    | uncharacterized LOC541471                                                    | -0.5361 | 0.0221 |
| 16882576 | MIR4435-1    | microRNA 4435-1                                                              | -0.3127 | 0.0004 |
| 16882658 | RPIA         | ribose 5-phosphate isomerase A                                               | -0.315  | 0.0157 |
| 16882912 | FAHD2A       | fumarylacetoacetate hydrolase domain containing 2A                           | -0.2477 | 0.0372 |
| 16882942 |              |                                                                              | -0.5109 | 0.0479 |
| 16882950 | LOC285033    | uncharacterized LOC285033                                                    | -0.2523 | 0.0068 |
| 16882975 | NCAPH        | non-SMC condensin I complex, subunit H                                       | -0.4469 | 0.0074 |
| 16883498 | NPAS2        | neuronal PAS domain protein 2                                                | -1.1032 | 0      |
| 16883530 |              |                                                                              | -0.8149 | 0.0001 |
| 16883895 | C2orf49      | chromosome 2 open reading frame 49                                           | -0.2394 | 0.0464 |
| 16883905 | LOC100506494 | uncharacterized LOC100506494                                                 | -0.4923 | 0.0143 |
| 16883954 |              |                                                                              | -0.1383 | 0.0342 |
| 16883978 | RGPD4        | RANBP2-like and GRIP domain containing 4                                     | -0.2303 | 0.0295 |
| 16884099 | LIMS1        | LIM and senescent cell antigen-like domains 1                                | -0.3921 | 0.0185 |
| 16884204 | RGPD6        | RANBP2-like and GRIP domain containing 6                                     | -0.2072 | 0.0385 |
| 16884245 | LIMS3        | LIM and senescent cell antigen-like domains 3                                | -0.3215 | 0.021  |
| 16884285 | LOC440895    | two pore channel 3 pseudogene                                                | -0.4662 | 0.0157 |
| 16884357 |              |                                                                              | -0.5335 | 0.0047 |
| 16884360 |              |                                                                              | -0.2885 | 0.0445 |
| 16884461 | TTL          | tubulin tyrosine ligase                                                      | -0.3767 | 0.0039 |
| 16884520 |              |                                                                              | -0.1813 | 0.0482 |
| 16884523 | SLC20A1      | solute carrier family 20 (phosphate transporter), member 1                   | -0.3768 | 0.0192 |
| 16884703 | CBWD1        | COBW domain containing 1                                                     | -0.3588 | 0.0107 |
| 16884827 | DPP10        | dipeptidyl-peptidase 10 (non-functional)                                     | -1.0566 | 0.003  |
| 16884877 | DDX18        | DEAD (Asp-Glu-Ala-Asp) box polypeptide 18                                    | -0.4028 | 0.0023 |
| 16884903 |              |                                                                              | -0.2517 | 0.0138 |
| 16885028 | TMEM177      | transmembrane protein 177                                                    | -0.2337 | 0.044  |
| 16885041 | PTPN4        | protein tyrosine phosphatase, non-receptor type 4 (megakaryocyte)            | -0.3347 | 0.0161 |
| 16885189 | RNU4ATAC     | RNA, U4atac small nuclear (U12-dependent splicing)                           | -0.5235 | 0.0249 |
| 16885191 | LOC254128    | uncharacterized LOC254128                                                    | -0.2209 | 0.0444 |
| 16885421 | SFT2D3       | SFT2 domain containing 3                                                     | -0.2489 | 0.0047 |
| 16885526 | IMP4         | IMP4, U3 small nucleolar ribonucleoprotein, homolog (yeast)                  | -0.2628 | 0.0131 |
| 16885874 | MGAT5        | mannosyl (alpha-1,6-)-glycoprotein beta-1,6-N-acetylglucosaminyltransferase  | -0.5192 | 0.0001 |
| 16885913 | CCNT2        | cyclin T2                                                                    | -0.3622 | 0.0078 |

|          |              |                                                                                    |         |        |
|----------|--------------|------------------------------------------------------------------------------------|---------|--------|
| 16885978 | R3HDM1       | R3H domain containing 1                                                            | -0.36   | 0.0119 |
| 16886020 | UBXN4        | UBX domain protein 4                                                               | -0.2421 | 0.01   |
| 16886246 | ZEB2-AS1     | ZEB2 antisense RNA 1 (non-protein coding)                                          | -0.3609 | 0.0131 |
| 16886356 | EPC2         | enhancer of polycomb homolog 2 (Drosophila)                                        | -0.3144 | 0.0337 |
| 16886503 | RIF1         | RAP1 interacting factor homolog (yeast)                                            | -0.4415 | 0.0022 |
| 16886558 |              |                                                                                    | -0.4049 | 0.0262 |
| 16886564 | FMNL2        | formin-like 2                                                                      | -0.6411 | 0.0011 |
| 16886602 | ARL6IP6      | ADP-ribosylation-like factor 6 interacting protein 6                               | -0.6003 | 0.0014 |
| 16886710 |              |                                                                                    | -1.0337 | 0.0407 |
| 16886854 | LOC100505957 | uncharacterized LOC100505957                                                       | -0.4144 | 0.034  |
| 16886864 | 7-Mar        | membrane-associated ring finger (C3HC4) 7, E3 ubiquitin protein ligase             | -0.4815 | 0.0004 |
| 16887118 | LOC100506134 | uncharacterized LOC100506134                                                       | -0.2198 | 0.0301 |
| 16887463 | SP5          | Sp5 transcription factor                                                           | -0.2359 | 0.0357 |
| 16887635 | HAT1         | histone acetyltransferase 1                                                        | -0.4159 | 0.0015 |
| 16887736 | PDK1         | pyruvate dehydrogenase kinase, isozyme 1                                           | -1.1387 | 0.0001 |
| 16887900 |              |                                                                                    | -0.4722 | 0.0422 |
| 16887906 |              |                                                                                    | -0.1579 | 0.0351 |
| 16887945 | HOXD9        | homeobox D9                                                                        | -0.4121 | 0.027  |
| 16887962 | HOXD3        | homeobox D3                                                                        | -0.3429 | 0.0203 |
| 16888412 | NUP35        | nucleoporin 35kDa                                                                  | -0.2398 | 0.0263 |
| 16889113 |              |                                                                                    | -0.3959 | 0.0392 |
| 16889126 | HSPE1-MOB4   | HSPE1-MOB4 readthrough                                                             | -1.1001 | 0      |
| 16889154 | MARS2        | methionyl-tRNA synthetase 2, mitochondrial                                         | -0.3452 | 0.0016 |
| 16889251 | SGOL2        | shugoshin-like 2 (S. pombe)                                                        | -0.2537 | 0.0279 |
| 16889602 | NOP58        | NOP58 ribonucleoprotein homolog (yeast)                                            | -0.3388 | 0.0066 |
| 16889631 | SNORD11      | small nucleolar RNA, C/D box 11                                                    | -0.5031 | 0.0088 |
| 16889711 |              |                                                                                    | -0.4826 | 0.0431 |
| 16889715 |              |                                                                                    | -0.5273 | 0.0417 |
| 16889718 |              |                                                                                    | -0.889  | 0.0107 |
| 16889721 |              |                                                                                    | -0.8041 | 0.0271 |
| 16889722 |              |                                                                                    | -0.5872 | 0.0358 |
| 16889726 |              |                                                                                    | -0.8161 | 0.0074 |
| 16889741 |              |                                                                                    | -1.1019 | 0.0007 |
| 16889745 |              |                                                                                    | -0.8643 | 0.0407 |
| 16889753 |              |                                                                                    | -0.5847 | 0.0435 |
| 16889757 |              |                                                                                    | -0.882  | 0.0168 |
| 16889758 |              |                                                                                    | -0.6542 | 0.0274 |
| 16889759 |              |                                                                                    | -1.0399 | 0.0378 |
| 16889779 | ABI2         | abl-interactor 2                                                                   | -0.4928 | 0.0097 |
| 16889929 |              |                                                                                    | -0.5303 | 0.0117 |
| 16889938 | EEF1B2       | eukaryotic translation elongation factor 1 beta 2                                  | -0.2184 | 0.0413 |
| 16890118 | LOC100507443 | uncharacterized LOC100507443                                                       | -0.1819 | 0.022  |
| 16890126 | PIKFYVE      | phosphoinositide kinase, FYVE finger containing                                    | -0.3195 | 0.0391 |
| 16890490 | ATIC         | 5-aminoimidazole-4-carboxamide ribonucleotide formyltransferase/IMP cyclohydrolase | -0.3099 | 0.0137 |
| 16890611 |              |                                                                                    | -2.5213 | 0.0001 |
| 16890651 | RPL37A       | ribosomal protein L37a                                                             | -0.1562 | 0.0136 |
| 16890716 |              |                                                                                    | -0.2992 | 0.0346 |
| 16890915 | RQCD1        | RCD1 required for cell differentiation1 homolog (S. pombe)                         | -0.4144 | 0.0003 |
| 16891176 | ANKZF1       | ankyrin repeat and zinc finger domain containing 1                                 | -0.3794 | 0.0355 |
| 16891403 | INHA         | inhibin, alpha                                                                     | -1.8912 | 0      |
| 16891409 | STK11IP      | serine/threonine kinase 11 interacting protein                                     | -0.1897 | 0.0475 |
| 16891453 | SLC4A3       | solute carrier family 4, anion exchanger, member 3                                 | -0.4529 | 0.0308 |
| 16891523 |              |                                                                                    | -0.1165 | 0.0459 |
| 16891603 | KCNE4        | potassium voltage-gated channel, Isk-related family, member 4                      | -0.2587 | 0.0197 |
| 16891752 | AGFG1        | ArfGAP with FG repeats 1                                                           | -0.2915 | 0.0361 |
| 16892039 | PSMD1        | proteasome (prosome, macropain) 26S subunit, non-ATPase, 1                         | -0.2234 | 0.0448 |

|          |              |                                                                     |         |        |
|----------|--------------|---------------------------------------------------------------------|---------|--------|
| 16892153 | COPS7B       | COP9 constitutive photomorphogenic homolog subunit 7B (Arabidopsis) | -0.2766 | 0.0284 |
| 16892321 | EIF4E2       | eukaryotic translation initiation factor 4E family member 2         | -0.2787 | 0.0255 |
| 16892356 | GIGYF2       | GRB10 interacting GYF protein 2                                     | -0.2913 | 0.0258 |
| 16892418 |              |                                                                     | -0.2852 | 0.0457 |
| 16892555 | DGKD         | diacylglycerol kinase, delta 130kDa                                 | -0.5397 | 0.0002 |
| 16892781 | AGAP1        | ArfGAP with GTPase domain, ankyrin repeat and PH domain 1           | -0.3122 | 0.0376 |
| 16893414 | ANO7         | anoctamin 7                                                         | -0.1805 | 0.0155 |
| 16893452 |              |                                                                     | -0.8453 | 0.0061 |
| 16893453 |              |                                                                     | -1.1219 | 0.0022 |
| 16893455 |              |                                                                     | -0.6494 | 0.0259 |
| 16893456 |              |                                                                     | -0.6257 | 0.0077 |
| 16893464 |              |                                                                     | -0.8178 | 0.0212 |
| 16893474 |              |                                                                     | -0.8045 | 0.0066 |
| 16893482 | FARP2        | FERM, RhoGEF and pleckstrin domain protein 2                        | -0.3111 | 0.0278 |
| 16893634 | GAL3ST2      | galactose-3-O-sulfotransferase 2                                    | -0.2522 | 0.0341 |
| 16893663 |              |                                                                     | -0.1517 | 0.0284 |
| 16893709 | SH3YL1       | SH3 domain containing, Ysc84-like 1 (S. cerevisiae)                 | -0.8596 | 0.0001 |
| 16893748 | FAM150B      | family with sequence similarity 150, member B                       | -0.6255 | 0.0063 |
| 16893773 | TMEM18       | transmembrane protein 18                                            | -0.3384 | 0.0063 |
| 16893846 | PXDN         | peroxidasin homolog (Drosophila)                                    | -0.5776 | 0.0046 |
| 16893986 | TSSC1-IT1    | TSSC1 intronic transcript 1 (non-protein coding)                    | -0.5482 | 0.0031 |
| 16893989 | TRAPPC12-AS1 | TRAPPC12 antisense RNA 1 (non-protein coding)                       | -0.3519 | 0.0129 |
| 16894155 |              |                                                                     | -0.2305 | 0.032  |
| 16894181 | LINC00299    | long intergenic non-protein coding RNA 299                          | -0.356  | 0.0335 |
| 16894335 | ADAM17       | ADAM metalloproteinase domain 17                                    | -0.3974 | 0.0068 |
| 16894883 | MATN3        | matrilin 3                                                          | -0.9504 | 0.0357 |
| 16894967 |              |                                                                     | -0.4691 | 0.0025 |
| 16894998 | C2orf43      | chromosome 2 open reading frame 43                                  | -0.4909 | 0.0144 |
| 16895118 | ATAD2B       | ATPase family, AAA domain containing 2B                             | -0.3613 | 0.0049 |
| 16895262 | LOC100507630 | uncharacterized LOC100507630                                        | -0.1957 | 0.0036 |
| 16895530 | OTOF         | otoferlin                                                           | -0.1674 | 0.0287 |
| 16896256 | MEMO1        | mediator of cell motility 1                                         | -0.2369 | 0.0392 |
| 16896315 | RN5S91       | RNA, 5S ribosomal 91                                                | -0.2433 | 0.0407 |
| 16896481 | CEBPZ        | CCAAT/enhancer binding protein (C/EBP), zeta                        | -0.4303 | 0.0005 |
| 16896502 | PRKD3        | protein kinase D3                                                   | -0.8113 | 0.0363 |
| 16896557 |              |                                                                     | -0.495  | 0.0361 |
| 16896579 | ATL2         | atlastin GTPase 2                                                   | -0.4362 | 0.0135 |
| 16896744 | SOS1-IT1     | SOS1 intronic transcript 1 (non-protein coding)                     | -0.2495 | 0.0328 |
| 16896816 | THUMPD2      | THUMP domain containing 2                                           | -0.2741 | 0.0286 |
| 16896905 | KCNG3        | potassium voltage-gated channel, subfamily G, member 3              | -0.6225 | 0.0033 |
| 16897221 |              |                                                                     | -0.2197 | 0.0474 |
| 16897313 | CALM2        | calmodulin 2 (phosphorylase kinase, delta)                          | -0.2117 | 0.0268 |
| 16897560 | PSME4        | proteasome (prosome, macropain) activator subunit 4                 | -0.5315 | 0.0021 |
| 16897631 |              |                                                                     | -0.5978 | 0.0372 |
| 16897634 |              |                                                                     | -0.5549 | 0.0447 |
| 16897719 | CCDC88A      | coiled-coil domain containing 88A                                   | -0.4115 | 0.0382 |
| 16897946 | BCL11A       | B-cell CLL/lymphoma 11A (zinc finger protein)                       | -0.6981 | 0.0005 |
| 16898002 | USP34        | ubiquitin specific peptidase 34                                     | -0.5996 | 0.0027 |
| 16898110 | XPO1         | exportin 1 (CRM1 homolog, yeast)                                    | -0.284  | 0.0052 |
| 16898157 |              |                                                                     | -0.2307 | 0.0265 |
| 16898160 | FAM161A      | family with sequence similarity 161, member A                       | -0.3466 | 0.043  |
| 16898403 | SPRED2       | sprouty-related, EVH1 domain containing 2                           | -0.3424 | 0.0428 |
| 16898496 |              |                                                                     | -0.3211 | 0.0183 |
| 16898601 | NFU1         | NFU1 iron-sulfur cluster scaffold homolog (S. cerevisiae)           | -0.2236 | 0.0476 |
| 16898617 | AAK1         | AP2 associated kinase 1                                             | -0.2392 | 0.0452 |
| 16898665 | ASPRV1       | aspartic peptidase, retroviral-like 1                               | -0.2278 | 0.0219 |

|          |           |                                                                 |         |        |
|----------|-----------|-----------------------------------------------------------------|---------|--------|
| 16898911 | CYP26B1   | cytochrome P450, family 26, subfamily B, polypeptide 1          | -0.3806 | 0.0391 |
| 16898954 |           |                                                                 | -0.2427 | 0.0191 |
| 16899288 | LBX2      | ladybird homeobox 2                                             | -0.3877 | 0.0197 |
| 16899335 | AUP1      | ancient ubiquitous protein 1                                    | -0.3493 | 0.026  |
| 16899729 | C2orf68   | chromosome 2 open reading frame 68                              | -0.2393 | 0.028  |
| 16899764 | ST3GAL5   | ST3 beta-galactoside alpha-2,3-sialyltransferase 5              | -0.5082 | 0.0133 |
| 16899788 |           |                                                                 | -0.4755 | 0.0027 |
| 16899846 | IMMT      | inner membrane protein, mitochondrial                           | -0.3264 | 0.0103 |
| 16899970 | LOC285074 | anaphase promoting complex subunit 1 pseudogene                 | -0.2751 | 0.0248 |
| 16899985 | RGPD2     | RANBP2-like and GRIP domain containing 2                        | -0.2516 | 0.0312 |
| 16900474 | SNRNP200  | small nuclear ribonucleoprotein 200kDa (U5)                     | -0.3759 | 0.0042 |
| 16900475 |           |                                                                 | -0.4177 | 0.0036 |
| 16900479 |           |                                                                 | -0.4394 | 0.0263 |
| 16900483 |           |                                                                 | -0.4239 | 0.0144 |
| 16900484 |           |                                                                 | -0.3469 | 0.0404 |
| 16900487 |           |                                                                 | -0.4264 | 0.0028 |
| 16900488 |           |                                                                 | -0.5663 | 0.0177 |
| 16900489 |           |                                                                 | -0.5923 | 0.0347 |
| 16900490 |           |                                                                 | -0.4133 | 0.0106 |
| 16900492 |           |                                                                 | -0.4847 | 0.0456 |
| 16900494 |           |                                                                 | -0.3573 | 0.0336 |
| 16900497 |           |                                                                 | -0.4128 | 0.0191 |
| 16900505 |           |                                                                 | -0.4348 | 0.0023 |
| 16900507 |           |                                                                 | -0.5852 | 0.0024 |
| 16900508 |           |                                                                 | -0.4642 | 0.0026 |
| 16900509 |           |                                                                 | -0.4918 | 0.0006 |
| 16900510 |           |                                                                 | -0.3884 | 0.0141 |
| 16900511 |           |                                                                 | -0.7308 | 0.0202 |
| 16900512 |           |                                                                 | -0.9789 | 0.0065 |
| 16900514 |           |                                                                 | -0.4935 | 0.0087 |
| 16900515 |           |                                                                 | -0.6444 | 0.0015 |
| 16900516 |           |                                                                 | -0.4232 | 0.0167 |
| 16900520 |           |                                                                 | -0.4323 | 0.002  |
| 16900521 |           |                                                                 | -0.4056 | 0.0227 |
| 16900522 |           |                                                                 | -0.4796 | 0.0008 |
| 16900523 |           |                                                                 | -0.3415 | 0.0146 |
| 16900526 |           |                                                                 | -0.3762 | 0.0322 |
| 16900527 |           |                                                                 | -0.366  | 0.017  |
| 16900529 |           |                                                                 | -0.4448 | 0.0216 |
| 16900530 |           |                                                                 | -0.3651 | 0.0096 |
| 16900532 |           |                                                                 | -0.5179 | 0.0008 |
| 16900533 |           |                                                                 | -0.5827 | 0.0416 |
| 16900608 | ANKRD39   | ankyrin repeat domain 39                                        | -0.1937 | 0.0187 |
| 16900718 |           |                                                                 | -0.303  | 0.012  |
| 16900724 |           |                                                                 | -0.3244 | 0.0259 |
| 16900783 | ACTR1B    | ARP1 actin-related protein 1 homolog B, centractin beta (yeast) | -0.3421 | 0.0476 |
| 16900856 |           |                                                                 | -0.3442 | 0.0388 |
| 16901027 | REV1      | REV1, polymerase (DNA directed)                                 | -0.3976 | 0.0342 |
| 16901158 | NPAS2     | neuronal PAS domain protein 2                                   | -0.3062 | 0.0054 |
| 16901393 | FHL2      | four and a half LIM domains 2                                   | -0.5619 | 0.0405 |
| 16901699 | LIMS3     | LIM and senescent cell antigen-like domains 3                   | -0.544  | 0.0087 |
| 16901716 | RGPD6     | RANBP2-like and GRIP domain containing 6                        | -0.2024 | 0.04   |
| 16901755 | BUB1      | budding uninhibited by benzimidazoles 1 homolog (yeast)         | -1.0315 | 0.001  |
| 16901825 | MIR4435-1 | microRNA 4435-1                                                 | -0.3127 | 0.0004 |
| 16901827 |           |                                                                 | -0.5933 | 0.0147 |
| 16901830 | ANAPC1    | anaphase promoting complex subunit 1                            | -0.2413 | 0.0113 |
| 16901894 | ZC3H8     | zinc finger CCCH-type containing 8                              | -0.2801 | 0.0301 |
| 16901912 | RGPD8     | RANBP2-like and GRIP domain containing 8                        | -0.2175 | 0.0231 |
| 16901957 | CKAP2L    | cytoskeleton associated protein 2-like                          | -1.0348 | 0.0015 |

|          |              |                                                                                               |         |        |
|----------|--------------|-----------------------------------------------------------------------------------------------|---------|--------|
| 16902035 |              |                                                                                               | -0.4307 | 0.0084 |
| 16902064 | SLC35F5      | solute carrier family 35, member F5                                                           | -0.3884 | 0.028  |
| 16902101 |              |                                                                                               | -0.2837 | 0.026  |
| 16902118 |              |                                                                                               | -0.5484 | 0.0053 |
| 16902134 | LOC389023    | uncharacterized LOC389023                                                                     | -1.0741 | 0.0026 |
| 16902296 | CLASP1       | cytoplasmic linker associated protein 1                                                       | -0.493  | 0.0037 |
| 16902353 |              |                                                                                               | -0.4924 | 0.0379 |
| 16902357 | MKI67IP      | MKI67 (FHA domain) interacting nucleolar phosphoprotein                                       | -0.4217 | 0.0107 |
| 16902567 |              |                                                                                               | -0.2236 | 0.0151 |
| 16902603 | POLR2D       | polymerase (RNA) II (DNA directed) polypeptide D                                              | -0.4262 | 0.0049 |
| 16902611 | AMMECR1L     | AMME chromosomal region gene 1-like                                                           | -0.3484 | 0.0401 |
| 16902664 | LOC151121    | uncharacterized LOC151121                                                                     | -0.1303 | 0.0167 |
| 16902794 | CCDC115      | coiled-coil domain containing 115                                                             | -0.2258 | 0.0286 |
| 16902865 | FAM168B      | family with sequence similarity 168, member B                                                 | -0.3717 | 0.0174 |
| 16903026 |              |                                                                                               | -0.3411 | 0.0165 |
| 16903065 |              |                                                                                               | -0.4158 | 0.0237 |
| 16903090 | MCM6         | minichromosome maintenance complex component 6                                                | -0.5538 | 0.0143 |
| 16903111 | DARS         | aspartyl-tRNA synthetase                                                                      | -0.4196 | 0.0083 |
| 16903327 | GTDC1        | glycosyltransferase-like domain containing 1                                                  | -0.3671 | 0.0055 |
| 16903356 | ZEB2         | zinc finger E-box binding homeobox 2                                                          | -0.3712 | 0.0136 |
| 16903403 |              |                                                                                               | -0.1302 | 0.0334 |
| 16903427 | ORC4         | origin recognition complex, subunit 4                                                         | -0.3517 | 0.0262 |
| 16903461 | MMADHC       | methylmalonic aciduria (cobalamin deficiency) cblD type, with homocystinuria                  | -0.2637 | 0.0118 |
| 16903529 | RBM43        | RNA binding motif protein 43                                                                  | -0.377  | 0.0093 |
| 16903815 | PRPF40A      | PRP40 pre-mRNA processing factor 40 homolog A (S. cerevisiae)                                 | -0.3186 | 0.0083 |
| 16904039 | BAZ2B        | bromodomain adjacent to zinc finger domain, 2B                                                | -0.3914 | 0.0256 |
| 16904097 |              |                                                                                               | -0.4849 | 0.0441 |
| 16904588 | TTC21B       | tetratricopeptide repeat domain 21B                                                           | -0.4477 | 0.0003 |
| 16904780 | SPC25        | SPC25, NDC80 kinetochore complex component, homolog (S. cerevisiae)                           | -0.8843 | 0.0012 |
| 16905127 |              |                                                                                               | -0.2207 | 0.0422 |
| 16905407 | LOC100129455 | uncharacterized LOC100129455                                                                  | -0.3236 | 0.0091 |
| 16906352 | COL5A2       | collagen, type V, alpha 2                                                                     | -0.5601 | 0.0084 |
| 16906962 | HSPD1        | heat shock 60kDa protein 1 (chaperonin)                                                       | -0.5945 | 0      |
| 16907029 |              |                                                                                               | -0.1729 | 0.0021 |
| 16907087 | TYW5         | tRNA- $\gamma$ W synthesizing protein 5                                                       | -0.4624 | 0.0024 |
| 16907482 |              |                                                                                               | -0.6334 | 0.0192 |
| 16907718 |              |                                                                                               | -0.2666 | 0.0212 |
| 16907758 | IDH1         | isocitrate dehydrogenase 1 (NADP+), soluble                                                   | -0.5737 | 0.0016 |
| 16907960 | BARD1        | BRCA1 associated RING domain 1                                                                | -0.476  | 0.0423 |
| 16908197 | IGFBP5       | insulin-like growth factor binding protein 5                                                  | -0.9353 | 0.0182 |
| 16908373 | USP37        | ubiquitin specific peptidase 37                                                               | -0.5706 | 0.0015 |
| 16908415 | ZNF142       | zinc finger protein 142                                                                       | -0.3435 | 0.0091 |
| 16908433 | RNF25        | ring finger protein 25                                                                        | -0.2333 | 0.0346 |
| 16908557 | NHEJ1        | nonhomologous end-joining factor 1                                                            | -0.3441 | 0.0489 |
| 16908618 | ABCB6        | ATP-binding cassette, sub-family B (MDR/TAP), member 6                                        | -0.5992 | 0.0036 |
| 16908656 | ATG9A        | autophagy related 9A                                                                          | -0.3544 | 0.0197 |
| 16908834 | OBSL1        | obscurin-like 1                                                                               | -0.4707 | 0.0076 |
| 16908897 | EPHA4        | EPH receptor A4                                                                               | -0.6151 | 0.0439 |
| 16908948 | FARSB        | phenylalanyl-tRNA synthetase, beta subunit                                                    | -0.3934 | 0.0001 |
| 16908972 |              |                                                                                               | -0.2644 | 0.0017 |
| 16909021 | SERPINE2     | serpin peptidase inhibitor, clade E (nexin, plasminogen activator inhibitor type 1), member 2 | -0.7492 | 0.0348 |
| 16909524 | SNORD20      | small nucleolar RNA, C/D box 20                                                               | -0.6703 | 0.0138 |
| 16909532 | NMUR1        | neuromedin U receptor 1                                                                       | -0.2615 | 0      |
| 16909595 | KCNJ13       | potassium inwardly-rectifying channel, subfamily J, member 13                                 | -0.2954 | 0.0383 |
| 16909700 | HJURP        | Holliday junction recognition protein                                                         | -0.6644 | 0.0007 |



|          |              |                                                                                   |         |        |
|----------|--------------|-----------------------------------------------------------------------------------|---------|--------|
| 16909828 | COL6A3       | collagen, type VI, alpha 3                                                        | -0.9156 | 0.0036 |
| 16909882 |              |                                                                                   | -0.1507 | 0.0348 |
| 16909993 |              |                                                                                   | -0.616  | 0.0028 |
| 16910295 | LOC200772    | uncharacterized LOC200772                                                         | -0.1404 | 0.0437 |
| 16910312 |              |                                                                                   | -0.3627 | 0.0332 |
| 16910501 | DTYMK        | deoxythymidylate kinase (thymidylate kinase)                                      | -0.2686 | 0.0314 |
| 16910523 |              |                                                                                   | -0.2001 | 0.0226 |
| 16910609 | TRIB3        | tribbles homolog 3 (Drosophila)                                                   | -0.3732 | 0.0009 |
| 16910766 | TGM3         | transglutaminase 3 (E polypeptide, protein-glutamine-gamma-glutamyltransferase)   | -0.1157 | 0.0217 |
| 16911145 |              |                                                                                   | -0.6694 | 0.0194 |
| 16911455 |              |                                                                                   | -0.201  | 0.0455 |
| 16912379 | TPX2         | TPX2, microtubule-associated, homolog (Xenopus laevis)                            | -0.8669 | 0.0281 |
| 16913090 | GDF5OS       | growth differentiation factor 5 opposite strand                                   | -0.1369 | 0.0304 |
| 16913731 |              |                                                                                   | -0.6696 | 0.0172 |
| 16913957 | MYBL2        | v-myb myeloblastosis viral oncogene homolog (avian)-like 2                        | -0.3658 | 0.033  |
| 16914117 | PABPC1L      | poly(A) binding protein, cytoplasmic 1-like                                       | -0.26   | 0.0424 |
| 16914169 |              |                                                                                   | -0.1674 | 0.0461 |
| 16914315 | UBE2C        | ubiquitin-conjugating enzyme E2C                                                  | -0.5911 | 0.0426 |
| 16914757 | SLC9A8       | solute carrier family 9, subfamily A (NHE8, cation proton antiporter 8), member 8 | -0.3979 | 0.0067 |
| 16914823 | LOC100506115 | uncharacterized LOC100506115                                                      | -0.2206 | 0.0452 |
| 16915064 | FAM209A      | family with sequence similarity 209, member A                                     | -0.3131 | 0.0104 |
| 16915091 | TFAP2C       | transcription factor AP-2 gamma (activating enhancer binding protein 2 gamma)     | -0.6188 | 0.0478 |
| 16915564 |              |                                                                                   | -0.3416 | 0.0004 |
| 16916920 | SLC23A2      | solute carrier family 23 (nucleobase transporters), member 2                      | -0.4817 | 0.046  |
| 16917183 | JAG1         | jagged 1                                                                          | -0.8155 | 0.0483 |
| 16917822 | FOXA2        | forkhead box A2                                                                   | -0.5036 | 0.0263 |
| 16917867 | LOC200261    | uncharacterized LOC200261                                                         | -0.1762 | 0.0211 |
| 16917963 | CST2         | cystatin SA                                                                       | -1.4966 | 0.0407 |
| 16917969 | CST5         | cystatin D                                                                        | -1.4441 | 0.0335 |
| 16918196 |              |                                                                                   | -0.3799 | 0.0217 |
| 16918445 | E2F1         | E2F transcription factor 1                                                        | -0.3834 | 0.0161 |
| 16918473 | LOC100505490 | uncharacterized LOC100505490                                                      | -0.3847 | 0.0037 |
| 16918755 | FER1L4       | fer-1-like 4 (C. elegans) pseudogene                                              | -0.1756 | 0.0288 |
| 16920241 |              |                                                                                   | -0.1689 | 0.0234 |
| 16920244 | LOC100506153 | uncharacterized LOC100506153                                                      | -0.2012 | 0.0388 |
| 16920470 |              |                                                                                   | -0.126  | 0.0337 |
| 16920548 | AURKA        | aurora kinase A                                                                   | -0.4291 | 0.0318 |
| 16921224 | KCNQ2        | potassium voltage-gated channel, KQT-like subfamily, member 2                     | -0.1356 | 0.0384 |
| 16921525 | RN5S488      | RNA, 5S ribosomal 488                                                             | -0.1281 | 0.0278 |
| 16921565 |              |                                                                                   | -0.3479 | 0.003  |
| 16921574 |              |                                                                                   | -0.3594 | 0.0245 |
| 16921578 |              |                                                                                   | -0.4229 | 0.0297 |
| 16922028 |              |                                                                                   | -0.196  | 0.0138 |
| 16922047 | GRIK1-AS2    | GRIK1 antisense RNA 2 (non-protein coding)                                        | -0.3207 | 0.0402 |
| 16922130 | MIS18A-AS1   | MIS18A antisense RNA 1 (non-protein coding)                                       | -0.3765 | 0.0041 |
| 16922243 | IL10RB       | interleukin 10 receptor, beta                                                     | -0.4645 | 0.0137 |
| 16922636 |              |                                                                                   | -0.2343 | 0.0191 |
| 16922809 |              |                                                                                   | -0.1142 | 0.0451 |
| 16922899 | PCP4         | Purkinje cell protein 4                                                           | -1.5306 | 0.0118 |
| 16923417 | AGPAT3       | 1-acylglycerol-3-phosphate O-acyltransferase 3                                    | -0.2581 | 0.0441 |
| 16923692 | FAM207A      | family with sequence similarity 207, member A                                     | -0.1669 | 0.036  |
| 16923745 |              |                                                                                   | -0.4958 | 0.0025 |
| 16923766 | COL18A1      | collagen, type XVIII, alpha 1                                                     | -0.3311 | 0.0364 |
| 16924007 | DIP2A        | DIP2 disco-interacting protein 2 homolog A (Drosophila)                           | -0.2481 | 0.0047 |
| 16924061 | DIP2A-IT1    | DIP2A intronic transcript 1 (non-protein coding)                                  | -0.3602 | 0.0236 |

|          |             |                                                                                                                            |         |        |
|----------|-------------|----------------------------------------------------------------------------------------------------------------------------|---------|--------|
| 16924101 | TEKT4P2     | tektin 4 pseudogene 2                                                                                                      | -0.4092 | 0.0071 |
| 16924207 | HSPA13      | heat shock protein 70kDa family, member 13                                                                                 | -0.3248 | 0.023  |
| 16924260 |             |                                                                                                                            | -0.3423 | 0.0053 |
| 16924709 | RWDD2B      | RWD domain containing 2B                                                                                                   | -0.5055 | 0.0191 |
| 16924719 | CCT8        | chaperonin containing TCP1, subunit 8 (theta)                                                                              | -0.2672 | 0.0235 |
| 16924828 | KRTAP19-2   | keratin associated protein 19-2                                                                                            | -0.3299 | 0.0438 |
| 16924920 | KRTAP19-8   | keratin associated protein 19-8                                                                                            | -0.2415 | 0.0077 |
| 16924928 | SCAF4       | SR-related CTD-associated factor 4                                                                                         | -0.2707 | 0.008  |
| 16924976 |             |                                                                                                                            | -0.1979 | 0.0218 |
| 16925194 | GART        | phosphoribosylglycinamide formyltransferase, phosphoribosylglycinamide synthetase, phosphoribosylaminoimidazole synthetase | -0.4626 | 0.0003 |
| 16925239 | DONSON      | downstream neighbor of SON                                                                                                 | -0.3937 | 0.0007 |
| 16925328 | KCNE1       | potassium voltage-gated channel, Isk-related family, member 1                                                              | -0.1738 | 0.0273 |
| 16925689 | BRWD1       | bromodomain and WD repeat domain containing 1                                                                              | -0.2727 | 0.0211 |
| 16925749 | BRWD1-IT2   | BRWD1 intronic transcript 2 (non-protein coding)                                                                           | -0.2748 | 0.0186 |
| 16925983 | C2CD2       | C2 calcium-dependent domain containing 2                                                                                   | -0.8301 | 0.0009 |
| 16926006 | C2CD2       | C2 calcium-dependent domain containing 2                                                                                   | -0.5759 | 0.0053 |
| 16926011 | ZNF295      | zinc finger protein 295                                                                                                    | -0.2828 | 0.0187 |
| 16926022 | C21orf128   | chromosome 21 open reading frame 128                                                                                       | -0.1687 | 0.0291 |
| 16926087 | WDR4        | WD repeat domain 4                                                                                                         | -0.2435 | 0.0311 |
| 16926111 | CBS         | cystathionine-beta-synthase                                                                                                | -0.2992 | 0.0043 |
| 16926148 | U2AF1       | U2 small nuclear RNA auxiliary factor 1                                                                                    | -0.276  | 0.0062 |
| 16926238 |             |                                                                                                                            | -0.2128 | 0.0109 |
| 16926412 | UBE2G2      | ubiquitin-conjugating enzyme E2G 2                                                                                         | -0.2718 | 0.0083 |
| 16926527 | POFUT2      | protein O-fucosyltransferase 2                                                                                             | -0.2166 | 0.0064 |
| 16926547 |             |                                                                                                                            | -0.229  | 0.0363 |
| 16926570 | SLC19A1     | solute carrier family 19 (folate transporter), member 1                                                                    | -0.2769 | 0.0097 |
| 16926644 | LSS         | lanosterol synthase (2,3-oxidosqualene-lanosterol cyclase)                                                                 | -0.6955 | 0.0223 |
| 16926679 | MCM3AP      | minichromosome maintenance complex component 3 associated protein                                                          | -0.2098 | 0.0344 |
| 16926768 |             |                                                                                                                            | -0.2893 | 0.0046 |
| 16926893 | BCL2L13     | BCL2-like 13 (apoptosis facilitator)                                                                                       | -0.3935 | 0.0095 |
| 16926922 | PEX26       | peroxisomal biogenesis factor 26                                                                                           | -0.299  | 0.0361 |
| 16927001 | DGCR5       | DiGeorge syndrome critical region gene 5 (non-protein coding)                                                              | -0.3336 | 0.049  |
| 16927052 | CDC45       | cell division cycle 45 homolog ( <i>S. cerevisiae</i> )                                                                    | -0.4582 | 0.0065 |
| 16927082 | SEPT5-GP1BB | SEPT5-GP1BB readthrough                                                                                                    | -0.2587 | 0.006  |
| 16927198 | RANBP1      | RAN binding protein 1                                                                                                      | -0.4278 | 0.001  |
| 16927283 |             |                                                                                                                            | -0.2061 | 0.0288 |
| 16927292 | ZNF74       | zinc finger protein 74                                                                                                     | -0.2128 | 0.042  |
| 16927401 | CRKL        | v-crk sarcoma virus CT10 oncogene homolog (avian)-like                                                                     | -0.298  | 0.0273 |
| 16927486 | THAP7-AS1   | THAP7 antisense RNA 1 (non-protein coding)                                                                                 | -0.3343 | 0.0117 |
| 16927588 | HIC2        | hypermethylated in cancer 2                                                                                                | -0.2122 | 0.0426 |
| 16927615 | UBE2L3      | ubiquitin-conjugating enzyme E2L 3                                                                                         | -0.3181 | 0.0049 |
| 16928098 | MIF         | macrophage migration inhibitory factor (glycosylation-inhibiting factor)                                                   | -0.3511 | 0.0141 |
| 16928109 | DDTL        | D-dopachrome tautomerase-like                                                                                              | -0.4162 | 0.0067 |
| 16928115 | GSTT2       | glutathione S-transferase theta 2                                                                                          | -1.1653 | 0.0459 |
| 16928212 | SPECC1L     | sperm antigen with calponin homology and coiled-coil domains 1-like                                                        | -0.3875 | 0.0217 |
| 16928282 | SNRPD3      | small nuclear ribonucleoprotein D3 polypeptide 18kDa                                                                       | -0.373  | 0.0079 |
| 16928337 | TOP1P2      | topoisomerase (DNA) I pseudogene 2                                                                                         | -0.1538 | 0.0052 |
| 16928372 | KIAA1671    | KIAA1671                                                                                                                   | -0.403  | 0.0176 |
| 16928415 | CRYBB2P1    | crystallin, beta B2 pseudogene 1                                                                                           | -0.322  | 0.0467 |
| 16928550 |             |                                                                                                                            | -0.5276 | 0.0041 |
| 16928553 | CRYBA4      | crystallin, beta A4                                                                                                        | -0.1133 | 0.0449 |
| 16928642 | TTC28-AS1   | TTC28 antisense RNA 1 (non-protein coding)                                                                                 | -0.2359 | 0.0243 |
| 16928668 | HSCB        | HscB iron-sulfur cluster co-chaperone homolog ( <i>E. coli</i> )                                                           | -0.3352 | 0.037  |

|          |          |                                                                                 |         |        |
|----------|----------|---------------------------------------------------------------------------------|---------|--------|
| 16928761 | EWSR1    | Ewing sarcoma breakpoint region 1                                               | -0.3157 | 0.0052 |
| 16928824 | NF2      | neurofibromin 2 (merlin)                                                        | -0.4393 | 0.0081 |
| 16928861 | UQCR10   | ubiquinol-cytochrome c reductase, complex III subunit X                         | -0.4338 | 0.0067 |
| 16928867 | MTMR3    | myotubularin related protein 3                                                  | -0.4475 | 0.0064 |
| 16928967 | MTFP1    | mitochondrial fission process 1                                                 | -0.5378 | 0.0124 |
| 16929049 | MIR3200  | microRNA 3200                                                                   | -0.3031 | 0.0103 |
| 16929056 | TUG1     | taurine upregulated 1 (non-protein coding)                                      | -0.464  | 0.0003 |
| 16929064 | SMTN     | smoothelin                                                                      | -0.2373 | 0.0002 |
| 16929193 |          |                                                                                 | -0.1927 | 0.047  |
| 16929203 | DRG1     | developmentally regulated GTP binding protein 1                                 | -0.4694 | 0.0083 |
| 16929218 |          |                                                                                 | -0.3158 | 0.0096 |
| 16929416 | FBXO7    | F-box protein 7                                                                 | -0.3524 | 0.0078 |
| 16929442 | TIMP3    | TIMP metalloproteinase inhibitor 3                                              | -0.8902 | 0.001  |
| 16929459 |          |                                                                                 | -0.4143 | 0.0116 |
| 16929509 | HMGXB4   | HMG box domain containing 4                                                     | -0.4603 | 0.0008 |
| 16929562 | HMOX1    | heme oxygenase (decycling) 1                                                    | -0.4664 | 0.0352 |
| 16929573 | MCM5     | minichromosome maintenance complex component 5                                  | -0.4359 | 0.0299 |
| 16929610 | RASD2    | RASD family, member 2                                                           | -0.586  | 0.0094 |
| 16929719 | KCTD17   | potassium channel tetramerisation domain containing 17                          | -0.4273 | 0.0058 |
| 16929782 | GGA1     | golgi-associated, gamma adaptin ear containing, ARF binding protein 1           | -0.2263 | 0.0382 |
| 16929849 | PDXP     | pyridoxal (pyridoxine, vitamin B6) phosphatase                                  | -0.3887 | 0.0063 |
| 16929882 | TRIOBP   | TRIO and F-actin binding protein                                                | -0.3793 | 0.0019 |
| 16929920 | H1F0     | H1 histone family, member 0                                                     | -0.6745 | 0.0327 |
| 16929943 | EIF3L    | eukaryotic translation initiation factor 3, subunit L                           | -0.3821 | 0.0328 |
| 16930100 | GTPBP1   | GTP binding protein 1                                                           | -0.2417 | 0.0349 |
| 16930144 | APOBEC3A | apolipoprotein B mRNA editing enzyme, catalytic polypeptide-like 3A             | -0.2085 | 0.0341 |
| 16930226 | SYNGR1   | synaptogyrin 1                                                                  | -0.2649 | 0.0076 |
| 16930238 | TAB1     | TGF-beta activated kinase 1/MAP3K7 binding protein 1                            | -0.3189 | 0.0017 |
| 16930271 | SMCR7L   | Smith-Magenis syndrome chromosome region, candidate 7-like                      | -0.273  | 0.0337 |
| 16930299 | ATF4     | activating transcription factor 4 (tax-responsive enhancer element B67)         | -0.5392 | 0.0004 |
| 16930418 | ADSL     | adenylosuccinate lyase                                                          | -0.3322 | 0.0357 |
| 16930518 | RBX1     | ring-box 1, E3 ubiquitin protein ligase                                         | -0.405  | 0.0065 |
| 16930534 | EP300    | E1A binding protein p300                                                        | -0.3744 | 0.0199 |
| 16930568 |          |                                                                                 | -0.3309 | 0.0324 |
| 16930598 | ZC3H7B   | zinc finger CCCH-type containing 7B                                             | -0.4058 | 0.039  |
| 16930678 | XRCC6    | X-ray repair complementing defective repair in Chinese hamster cells 6          | -0.3013 | 0.0263 |
| 16930758 | CCDC134  | coiled-coil domain containing 134                                               | -0.6674 | 0.0002 |
| 16930768 | SREBF2   | sterol regulatory element binding transcription factor 2                        | -0.8373 | 0.0003 |
| 16930947 | BIK      | BCL2-interacting killer (apoptosis-inducing)                                    | -0.3762 | 0.0049 |
| 16931169 | NUP50    | nucleoporin 50kDa                                                               | -0.4073 | 0.0099 |
| 16931384 | GTSE1    | G-2 and S-phase expressed 1                                                     | -0.5303 | 0.0069 |
| 16931647 | TRABD    | TraB domain containing                                                          | -0.3088 | 0.0209 |
| 16931677 | PPP6R2   | protein phosphatase 6, regulatory subunit 2                                     | -0.3713 | 0.0026 |
| 16931729 | NCAPH2   | non-SMC condensin II complex, subunit H2                                        | -0.1774 | 0.0135 |
| 16931856 |          |                                                                                 | -0.1243 | 0.0325 |
| 16931942 | CECR5    | cat eye syndrome chromosome region, candidate 5                                 | -0.3702 | 0.0034 |
| 16932006 |          |                                                                                 | -0.4394 | 0.0109 |
| 16932025 | MICAL3   | microtubule associated monooxygenase, calponin and LIM domain containing 3      | -0.2872 | 0.0362 |
| 16932079 |          |                                                                                 | -0.3023 | 0.008  |
| 16932204 | SLC25A1  | solute carrier family 25 (mitochondrial carrier; citrate transporter), member 1 | -0.455  | 0.0199 |
| 16932217 | CLTCL1   | clathrin, heavy chain-like 1                                                    | -0.6109 | 0.0028 |
| 16932261 | HIRA     | HIR histone cell cycle regulation defective homolog A (S. cerevisiae)           | -0.3263 | 0.0131 |
| 16932300 | UFD1L    | ubiquitin fusion degradation 1 like (yeast)                                     | -0.4103 | 0.0068 |

|          |              |                                                                                                  |         |        |
|----------|--------------|--------------------------------------------------------------------------------------------------|---------|--------|
| 16932341 | GNB1L        | guanine nucleotide binding protein (G protein), beta polypeptide 1-like                          | -0.2465 | 0.0145 |
| 16932420 | TRMT2A       | tRNA methyltransferase 2 homolog A ( <i>S. cerevisiae</i> )                                      | -0.1977 | 0.0307 |
| 16932526 |              |                                                                                                  | -0.3434 | 0.0225 |
| 16932732 |              |                                                                                                  | -0.2586 | 0.0024 |
| 16932831 | MAPK1        | mitogen-activated protein kinase 1                                                               | -0.3999 | 0.0012 |
| 16932914 | ZNF280B      | zinc finger protein 280B                                                                         | -0.7651 | 0.0018 |
| 16933044 | ZNF70        | zinc finger protein 70                                                                           | -0.3758 | 0.0099 |
| 16933049 | VPREB3       | pre-B lymphocyte 3                                                                               | -1.156  | 0.0229 |
| 16933055 | CHCHD10      | coiled-coil-helix-coiled-coil-helix domain containing 10                                         | -0.2455 | 0.0116 |
| 16933088 | GSTT2B       | glutathione S-transferase theta 2B (gene/pseudogene)                                             | -1.1112 | 0.0438 |
| 16933097 | DDT          | D-dopachrome tautomerase                                                                         | -0.5885 | 0.001  |
| 16933249 |              |                                                                                                  | -0.2422 | 0.0232 |
| 16933265 | LRP5L        | low density lipoprotein receptor-related protein 5-like                                          | -0.1863 | 0.0327 |
| 16933445 | PITPNB       | phosphatidylinositol transfer protein, beta                                                      | -0.364  | 0.009  |
| 16933470 | TTC28        | tetratricopeptide repeat domain 28                                                               | -0.376  | 0.0129 |
| 16933502 | CHEK2        | checkpoint kinase 2                                                                              | -0.3862 | 0.0051 |
| 16933564 | RHBDD3       | rhomboid domain containing 3                                                                     | -0.247  | 0.0384 |
| 16933630 | THOC5        | THO complex 5                                                                                    | -0.4365 | 0.0115 |
| 16933774 | GATSL3       | GATS protein-like 3                                                                              | -0.2684 | 0.0498 |
| 16933795 | TBC1D10A     | TBC1 domain family, member 10A                                                                   | -0.2121 | 0.0478 |
| 16933931 | PES1         | pescadillo ribosomal biogenesis factor 1                                                         | -0.3423 | 0.0176 |
| 16934075 | EIF4ENIF1    | eukaryotic translation initiation factor 4E nuclear import factor 1                              | -0.3681 | 0.0101 |
| 16934109 | PISD         | phosphatidylserine decarboxylase                                                                 | -0.327  | 0.0253 |
| 16934140 | PRR14L       | proline rich 14-like                                                                             | -0.3714 | 0.0031 |
| 16934227 | C22orf28     | chromosome 22 open reading frame 28                                                              | -0.2723 | 0.0439 |
| 16934229 |              |                                                                                                  | -0.8171 | 0.0387 |
| 16934230 |              |                                                                                                  | -0.4913 | 0.0043 |
| 16934232 |              |                                                                                                  | -0.7169 | 0.0178 |
| 16934234 |              |                                                                                                  | -0.4137 | 0.0429 |
| 16934239 |              |                                                                                                  | -0.462  | 0.0433 |
| 16934302 |              |                                                                                                  | -1.1219 | 0.0003 |
| 16934558 | TXN2         | thioredoxin 2                                                                                    | -0.5789 | 0.0151 |
| 16934586 |              |                                                                                                  | -0.4585 | 0.03   |
| 16934590 |              |                                                                                                  | -0.4117 | 0.032  |
| 16934602 |              |                                                                                                  | -0.4554 | 0.0473 |
| 16934844 |              |                                                                                                  | -0.3248 | 0.0104 |
| 16934866 | MIR659       | microRNA 659                                                                                     | -0.3168 | 0.0156 |
| 16934970 | TMEM184B     | transmembrane protein 184B                                                                       | -0.2357 | 0.029  |
| 16934991 | CSNK1E       | casein kinase 1, epsilon                                                                         | -0.2464 | 0.0475 |
| 16935130 | JOSD1        | Josephin domain containing 1                                                                     | -0.5161 | 0.0005 |
| 16935204 |              |                                                                                                  | -0.4302 | 0.0049 |
| 16935244 | SNORD83B     | small nucleolar RNA, C/D box 83B                                                                 | -0.2082 | 0.0057 |
| 16935320 | SLC25A17     | solute carrier family 25 (mitochondrial carrier; peroxisomal membrane protein, 34kDa), member 17 | -0.3209 | 0.0072 |
| 16935396 | RANGAP1      | Ran GTPase activating protein 1                                                                  | -0.4475 | 0.008  |
| 16935432 | PHF5A        | PHD finger protein 5A                                                                            | -0.416  | 0.0104 |
| 16935502 |              |                                                                                                  | -0.6183 | 0.0005 |
| 16935505 | SHISA8       | shisa homolog 8 ( <i>Xenopus laevis</i> )                                                        | -0.2144 | 0.0181 |
| 16935517 | CENPM        | centromere protein M                                                                             | -0.3431 | 0.0259 |
| 16935623 | RRP7A        | ribosomal RNA processing 7 homolog A ( <i>S. cerevisiae</i> )                                    | -0.2569 | 0.0244 |
| 16935648 | POLDIP3      | polymerase (DNA-directed), delta interacting protein 3                                           | -0.4814 | 0.0044 |
| 16935703 | ARFGAP3      | ADP-ribosylation factor GTPase activating protein 3                                              | -0.4829 | 0.0255 |
| 16935727 | PACSIN2      | protein kinase C and casein kinase substrate in neurons 2                                        | -0.3018 | 0.0228 |
| 16935775 | TTLL12       | tubulin tyrosine ligase-like family, member 12                                                   | -0.48   | 0.048  |
| 16935912 | LDLOC1L      | leucine zipper, down-regulated in cancer 1-like                                                  | -0.426  | 0.0158 |
| 16935955 | LOC100506714 | uncharacterized LOC100506714                                                                     | -0.2272 | 0.0241 |
| 16936230 | BRD1         | bromodomain containing 1                                                                         | -0.1938 | 0.0272 |
| 16936253 | LOC90834     | uncharacterized protein BC001742                                                                 | -0.2326 | 0.0132 |

|          |              |                                                                                         |         |        |
|----------|--------------|-----------------------------------------------------------------------------------------|---------|--------|
| 16936397 | MAPK12       | mitogen-activated protein kinase 12                                                     | -0.2935 | 0.0055 |
| 16936408 | MAPK12       | mitogen-activated protein kinase 12                                                     | -0.1268 | 0.0227 |
| 16936535 | SBF1         | SET binding factor 1                                                                    | -0.193  | 0.005  |
| 16936585 | LMF2         | lipase maturation factor 2                                                              | -0.2435 | 0.0284 |
| 16936761 | CHL1         | cell adhesion molecule with homology to L1CAM (close homolog of L1)                     | -1.1376 | 0.034  |
| 16936816 | CNTN6        | contactin 6                                                                             | -0.6558 | 0.0454 |
| 16936898 |              |                                                                                         | -0.1823 | 0.0337 |
| 16937201 | SETD5        | SET domain containing 5                                                                 | -0.2434 | 0.0497 |
| 16937503 | LOC442075    | uncharacterized LOC442075                                                               | -0.2367 | 0.036  |
| 16938092 | LOC100505696 | uncharacterized LOC100505696                                                            | -0.5247 | 0.0024 |
| 16938098 |              |                                                                                         | -1.1967 | 0.0006 |
| 16938133 | GALNTL2      | UDP-N-acetyl-alpha-D-galactosamine:polypeptide N-acetylgalactosaminyltransferase-like 2 | -0.5059 | 0.0016 |
| 16938182 | PLCL2        | phospholipase C-like 2                                                                  | -0.5633 | 0.0064 |
| 16938269 |              |                                                                                         | -0.4349 | 0.0172 |
| 16938296 | SGOL1-AS1    | SGOL1 antisense RNA 1 (non-protein coding)                                              | -0.5567 | 0.0267 |
| 16938313 |              |                                                                                         | -0.2094 | 0.0206 |
| 16938337 |              |                                                                                         | -0.1491 | 0.0319 |
| 16939046 | VILL         | villin-like                                                                             | -0.1813 | 0.016  |
| 16939503 |              |                                                                                         | -0.5767 | 0.0237 |
| 16939524 | ZNF620       | zinc finger protein 620                                                                 | -0.2729 | 0.0119 |
| 16939558 | CTNNB1       | catenin (cadherin-associated protein), beta 1, 88kDa                                    | -0.3706 | 0.0408 |
| 16939729 | HHATL-AS1    | HHATL antisense RNA 1 (non-protein coding)                                              | -0.2053 | 0.0021 |
| 16939731 | LOC348817    | uncharacterized LOC348817                                                               | -0.1818 | 0.0227 |
| 16939960 | KIF15        | kinesin family member 15                                                                | -0.5302 | 0.0137 |
| 16940190 | CCRL2        | chemokine (C-C motif) receptor-like 2                                                   | -0.2345 | 0.0173 |
| 16940239 | PTH1R        | parathyroid hormone 1 receptor                                                          | -0.2586 | 0.0441 |
| 16940332 | FLJ39534     | uncharacterized FLJ39534                                                                | -0.2445 | 0.0155 |
| 16940343 | KLHL18       | kelch-like 18 (Drosophila)                                                              | -0.2901 | 0.005  |
| 16940396 |              |                                                                                         | -0.6271 | 0.0141 |
| 16941344 | ALAS1        | aminolevulinate, delta-, synthase 1                                                     | -0.8628 | 0.0025 |
| 16942392 | ATXN7        | ataxin 7                                                                                | -0.3731 | 0.0197 |
| 16943241 | COL8A1       | collagen, type VIII, alpha 1                                                            | -0.4526 | 0.0001 |
| 16943425 |              |                                                                                         | -0.3539 | 0.0035 |
| 16943763 | PVRL3        | poliovirus receptor-related 3                                                           | -0.8056 | 0.0013 |
| 16944894 | UMPS         | uridine monophosphate synthetase                                                        | -0.3055 | 0.0352 |
| 16946077 | IL20RB       | interleukin 20 receptor beta                                                            | -0.1719 | 0.0241 |
| 16946228 | MRPS22       | mitochondrial ribosomal protein S22                                                     | -0.3457 | 0.0169 |
| 16946429 |              |                                                                                         | -0.2916 | 0.0439 |
| 16946759 |              |                                                                                         | -0.1888 | 0.0355 |
| 16946835 | WWTR1-AS1    | WWTR1 antisense RNA 1 (non-protein coding)                                              | -0.2548 | 0.0492 |
| 16947556 | SMC4         | structural maintenance of chromosomes 4                                                 | -0.5739 | 0.0127 |
| 16947974 | FNDC3B       | fibronectin type III domain containing 3B                                               | -0.4517 | 0.0006 |
| 16948021 | ECT2         | epithelial cell transforming sequence 2 oncogene                                        | -0.4735 | 0.0402 |
| 16948989 | POLR2H       | polymerase (RNA) II (DNA directed) polypeptide H                                        | -0.2616 | 0.0201 |
| 16949011 | CHRD         | chordin                                                                                 | -0.2001 | 0.0099 |
| 16949286 |              |                                                                                         | -0.2017 | 0.0223 |
| 16949759 | HES1         | hairy and enhancer of split 1, (Drosophila)                                             | -0.4365 | 0.012  |
| 16949814 |              |                                                                                         | -0.7984 | 0.0158 |
| 16949977 |              |                                                                                         | -0.1675 | 0.0029 |
| 16950895 | RPL32        | ribosomal protein L32                                                                   | -0.3755 | 0.0063 |
| 16951150 | SH3BP5       | SH3-domain binding protein 5 (BTK-associated)                                           | -0.5163 | 0.0002 |
| 16951354 | PLCL2-AS1    | PLCL2 antisense RNA 1 (non-protein coding)                                              | -1.015  | 0.014  |
| 16951485 | SGOL1        | shugoshin-like 1 (S. pombe)                                                             | -0.8289 | 0.0047 |
| 16952198 |              |                                                                                         | -0.4894 | 0.0239 |
| 16952797 | SLC6A20      | solute carrier family 6 (proline IMINO transporter), member 20                          | -0.1372 | 0.0259 |
| 16953123 | SCAP         | SREBF chaperone                                                                         | -0.7712 | 0.0002 |
| 16953279 | CDC25A       | cell division cycle 25 homolog A (S. pombe)                                             | -0.474  | 0.0044 |
| 16953597 | SLC26A6      | solute carrier family 26, member 6                                                      | -0.2596 | 0.037  |

|          |              |                                                                           |         |        |
|----------|--------------|---------------------------------------------------------------------------|---------|--------|
| 16953753 | SLC25A20     | solute carrier family 25 (carnitine/acylcarnitine translocase), member 20 | -0.4284 | 0.0131 |
| 16954066 | RHOA-IT1     | RHOA intronic transcript 1 (non-protein coding)                           | -0.259  | 0.0097 |
| 16954067 |              |                                                                           | -0.259  | 0.0097 |
| 16954608 | RN5S132      | RNA, 5S ribosomal 132                                                     | -0.2816 | 0.0469 |
| 16954707 | POC1A        | POC1 centriolar protein homolog A (Chlamydomonas)                         | -0.2937 | 0.0418 |
| 16954988 | MUSTN1       | musculoskeletal, embryonic nuclear protein 1                              | -0.368  | 0.0065 |
| 16955565 | FAM107A      | family with sequence similarity 107, member A                             | -0.3735 | 0.0088 |
| 16955935 | LOC100508226 | HHSL751                                                                   | -0.3576 | 0.0407 |
| 16956386 | ROBO1        | roundabout, axon guidance receptor, homolog 1 (Drosophila)                | -0.8173 | 0.0084 |
| 16956532 | VGLL3        | vestigial like 3 (Drosophila)                                             | -0.363  | 0.0251 |
| 16956980 |              |                                                                           | -0.8412 | 0.0281 |
| 16957396 | CCDC80       | coiled-coil domain containing 80                                          | -0.6588 | 0.0429 |
| 16957874 | LRRC58       | leucine rich repeat containing 58                                         | -0.4501 | 0.0497 |
| 16958356 | ITGB5        | integrin, beta 5                                                          | -0.3098 | 0.0336 |
| 16958972 | SNORA7B      | small nucleolar RNA, H/ACA box 7B                                         | -0.4721 | 0.0291 |
| 16959985 | ATR          | ataxia telangiectasia and Rad3 related                                    | -0.2939 | 0.014  |
| 16960046 |              |                                                                           | -0.338  | 0.0419 |
| 16960149 | PLSCR4       | phospholipid scramblase 4                                                 | -0.6038 | 0.0079 |
| 16960371 | WWTR1        | WW domain containing transcription regulator 1                            | -0.274  | 0.0489 |
| 16961003 | TRIM59       | tripartite motif containing 59                                            | -0.3242 | 0.0194 |
| 16961374 | ACTRT3       | actin-related protein T3                                                  | -0.3293 | 0.0034 |
| 16961607 |              |                                                                           | -0.36   | 0.0402 |
| 16961637 | NCEH1        | neutral cholesterol ester hydrolase 1                                     | -0.3338 | 0.0323 |
| 16962083 | RN5S151      | RNA, 5S ribosomal 151                                                     | -0.3246 | 0.024  |
| 16962213 | CLCN2        | chloride channel, voltage-sensitive 2                                     | -0.5564 | 0.0004 |
| 16962380 | ETV5         | ets variant 5                                                             | -0.6117 | 0.0189 |
| 16962731 |              |                                                                           | -0.1856 | 0.0264 |
| 16962907 | CPN2         | carboxypeptidase N, polypeptide 2                                         | -1.3139 | 0.0308 |
| 16963113 | APOD         | apolipoprotein D                                                          | -1.1109 | 0.0065 |
| 16963241 | TFRC         | transferrin receptor (p90, CD71)                                          | -0.6541 | 0.0081 |
| 16963509 |              |                                                                           | -0.4883 | 0.0006 |
| 16963646 |              |                                                                           | -0.4423 | 0.0362 |
| 16963873 |              |                                                                           | -0.5034 | 0.0119 |
| 16964000 | TACC3        | transforming, acidic coiled-coil containing protein 3                     | -0.4543 | 0.0076 |
| 16964888 | HTRA3        | HtrA serine peptidase 3                                                   | -0.4041 | 0.0474 |
| 16965346 | NCAPG        | non-SMC condensin I complex, subunit G                                    | -0.9355 | 0.0114 |
| 16965480 |              |                                                                           | -0.2867 | 0.0212 |
| 16966008 | KLF3         | Kruppel-like factor 3 (basic)                                             | -0.2678 | 0.0066 |
| 16967684 |              |                                                                           | -0.2463 | 0.0334 |
| 16967771 | IL8          | interleukin 8                                                             | -0.5093 | 0.0095 |
| 16967853 | AREG         | amphiregulin                                                              | -0.3055 | 0.0309 |
| 16967863 | AREG         | amphiregulin                                                              | -0.2642 | 0.0034 |
| 16968051 | 11-Sep       | septin 11                                                                 | -0.5105 | 0.0269 |
| 16968488 | WDFY3-AS2    | WDFY3 antisense RNA 2 (non-protein coding)                                | -0.595  | 0.0123 |
| 16969495 | NPNT         | nephronectin                                                              | -0.6944 | 0.0363 |
| 16969817 | C4orf32      | chromosome 4 open reading frame 32                                        | -0.4577 | 0.0163 |
| 16969988 |              |                                                                           | -0.2966 | 0.0282 |
| 16970563 | PLK4         | polo-like kinase 4                                                        | -0.4462 | 0.0272 |
| 16971256 | POU4F2       | POU class 4 homeobox 2                                                    | -0.144  | 0.0495 |
| 16972098 |              |                                                                           | -0.4437 | 0.0068 |
| 16972155 | MSMO1        | methylsterol monooxygenase 1                                              | -0.8708 | 0.0436 |
| 16972607 |              |                                                                           | -0.71   | 0.0113 |
| 16972616 | NEIL3        | nei endonuclease VIII-like 3 (E. coli)                                    | -0.6474 | 0.0074 |
| 16972842 |              |                                                                           | -0.4602 | 0.0168 |
| 16972981 |              |                                                                           | -0.6995 | 0.005  |
| 16974493 |              |                                                                           | -0.6378 | 0.0263 |
| 16974779 | GPR125       | G protein-coupled receptor 125                                            | -0.3946 | 0.01   |
| 16975032 | FLJ45721     | uncharacterized LOC401123                                                 | -0.1905 | 0.0008 |
| 16975305 |              |                                                                           | -0.6179 | 0.0051 |

|          |              |                                                                                             |         |        |
|----------|--------------|---------------------------------------------------------------------------------------------|---------|--------|
| 16976542 |              |                                                                                             | -0.3581 | 0.0017 |
| 16977153 |              |                                                                                             | -0.4494 | 0.0102 |
| 16977165 |              |                                                                                             | -0.3083 | 0.0341 |
| 16977709 |              |                                                                                             | -0.6324 | 0.007  |
| 16977810 | HSD17B13     | hydroxysteroid (17-beta) dehydrogenase 13                                                   | -0.1489 | 0.0467 |
| 16979515 | CCNA2        | cyclin A2                                                                                   | -1.0663 | 0.0049 |
| 16979917 | SLC7A11      | solute carrier family 7 (anionic amino acid transporter light chain, xc- system), member 11 | -1.0706 | 0.0118 |
| 16980031 | MAML3        | mastermind-like 3 (Drosophila)                                                              | -0.4761 | 0.0113 |
| 16980364 | ZNF827       | zinc finger protein 827                                                                     | -0.3458 | 0.0271 |
| 16980714 | MIR3140      | microRNA 3140                                                                               | -0.1176 | 0.0459 |
| 16981077 | MIR4454      | microRNA 4454                                                                               | -0.2893 | 0.0399 |
| 16981477 |              |                                                                                             | -0.2045 | 0.0245 |
| 16981730 | VEGFC        | vascular endothelial growth factor C                                                        | -0.95   | 0.004  |
| 16981887 |              |                                                                                             | -0.6456 | 0.0085 |
| 16981907 | LOC389247    | uncharacterized LOC389247                                                                   | -0.2863 | 0.0405 |
| 16981929 |              |                                                                                             | -0.2518 | 0.0063 |
| 16981962 | LOC728175    | uncharacterized LOC728175                                                                   | -0.3318 | 0.0032 |
| 16982183 | SORBS2       | sorbin and SH3 domain containing 2                                                          | -0.6276 | 0.0262 |
| 16982477 |              |                                                                                             | -0.7023 | 0.0201 |
| 16982508 | LRRC14B      | leucine rich repeat containing 14B                                                          | -0.1753 | 0.0136 |
| 16982635 | TRIP13       | thyroid hormone receptor interactor 13                                                      | -0.3129 | 0.0354 |
| 16982845 |              |                                                                                             | -0.1835 | 0.0018 |
| 16983148 |              |                                                                                             | -0.1587 | 0.0114 |
| 16983800 | TARS         | threonyl-tRNA synthetase                                                                    | -0.422  | 0.0096 |
| 16984032 | SKP2         | S-phase kinase-associated protein 2, E3 ubiquitin protein ligase                            | -0.6519 | 0.0035 |
| 16984080 |              |                                                                                             | -0.4546 | 0.0364 |
| 16984168 |              |                                                                                             | -0.183  | 0.0268 |
| 16984417 |              |                                                                                             | -0.2591 | 0.0463 |
| 16984629 | RN5S182      | RNA, 5S ribosomal 182                                                                       | -0.3557 | 0.0098 |
| 16984646 | ITGA1        | integrin, alpha 1                                                                           | -0.4677 | 0.0454 |
| 16986098 |              |                                                                                             | -1.9297 | 0.0009 |
| 16986249 | HMGCR        | 3-hydroxy-3-methylglutaryl-CoA reductase                                                    | -0.6169 | 0.0268 |
| 16987970 | STAR4-AS1    | STAR4 antisense RNA 1 (non-protein coding)                                                  | -0.3928 | 0.043  |
| 16989634 |              |                                                                                             | -0.1913 | 0.0253 |
| 16989636 | KIF20A       | kinesin family member 20A                                                                   | -0.6445 | 0.0195 |
| 16990122 |              |                                                                                             | -0.4446 | 0.0415 |
| 16990716 |              |                                                                                             | -0.1921 | 0.0333 |
| 16991372 | MIR1294      | microRNA 1294                                                                               | -0.2002 | 0.048  |
| 16991741 | PTTG1        | pituitary tumor-transforming 1                                                              | -0.2877 | 0.0376 |
| 16991760 | MIR3142      | microRNA 3142                                                                               | -0.1429 | 0.0454 |
| 16992314 |              |                                                                                             | -0.2964 | 0.025  |
| 16993433 | MAML1        | mastermind-like 1 (Drosophila)                                                              | -0.2089 | 0.0238 |
| 16993574 | BTNL9        | butyrophilin-like 9                                                                         | -0.1935 | 0.0159 |
| 16994211 | LOC442132    | golgin A6 family-like 1 pseudogene                                                          | -0.2475 | 0.0376 |
| 16995047 | ADAMTS12     | ADAM metalloproteinase with thrombospondin type 1 motif, 12                                 | -0.7756 | 0.0266 |
| 16995140 | RAD1         | RAD1 homolog (S. pombe)                                                                     | -0.3175 | 0.0167 |
| 16995461 | GDNF         | glial cell derived neurotrophic factor                                                      | -0.1943 | 0.0256 |
| 16995500 | LIFR         | leukemia inhibitory factor receptor alpha                                                   | -0.818  | 0.0183 |
| 16995863 |              |                                                                                             | -0.2604 | 0.0187 |
| 16995890 | HMGCS1       | 3-hydroxy-3-methylglutaryl-CoA synthase 1 (soluble)                                         | -1.0438 | 0.0202 |
| 16996234 | PPAP2A       | phosphatidic acid phosphatase type 2A                                                       | -0.437  | 0.0109 |
| 16996946 | GUSBP3       | glucuronidase, beta pseudogene 3                                                            | -0.3116 | 0.0257 |
| 16996971 | GUSBP9       | glucuronidase, beta pseudogene 9                                                            | -0.3088 | 0.0111 |
| 16997046 | GUSBP9       | glucuronidase, beta pseudogene 9                                                            | -0.3121 | 0.0369 |
| 16997146 | FOX1         | forkhead box D1                                                                             | -0.8037 | 0.0031 |
| 16997919 | RN5S187      | RNA, 5S ribosomal 187                                                                       | -0.5585 | 0.038  |
| 16997931 | LINC00461    | long intergenic non-protein coding RNA 461                                                  | -0.4059 | 0.0111 |
| 16998044 | LOC100505994 | uncharacterized LOC100505994                                                                | -0.467  | 0.0108 |

|          |                |                                                                   |         |        |
|----------|----------------|-------------------------------------------------------------------|---------|--------|
| 16998526 |                |                                                                   | -0.1442 | 0.0443 |
| 16998906 | MCC            | mutated in colorectal cancers                                     | -0.3919 | 0.041  |
| 16999072 |                |                                                                   | -0.2679 | 0.0094 |
| 16999475 | FBN2           | fibrillin 2                                                       | -0.9373 | 0.0189 |
| 16999575 |                |                                                                   | -0.5165 | 0.0403 |
| 17000104 | PITX1          | paired-like homeodomain 1                                         | -0.1627 | 0.0426 |
| 17000439 | CDC25C         | cell division cycle 25 homolog C (S. pombe)                       | -0.4994 | 0.0122 |
| 17001578 | PDGFRB         | platelet-derived growth factor receptor, beta polypeptide         | -0.7518 | 0.0148 |
| 17001843 |                |                                                                   | -0.6512 | 0.0202 |
| 17002598 | PANK3          | pantothenate kinase 3                                             | -0.341  | 0.0305 |
| 17003640 | ADAMTS2        | ADAM metalloproteinase with thrombospondin type 1 motif, 2        | -0.3399 | 0.0132 |
| 17004198 | FOXF2          | forkhead box F2                                                   | -0.2977 | 0.0139 |
| 17004266 | DKFZP686I15217 | uncharacterized LOC401232                                         | -0.2612 | 0.0068 |
| 17004335 |                |                                                                   | -0.5619 | 0.032  |
| 17004431 | C6orf201       | chromosome 6 open reading frame 201                               | -0.2234 | 0.0101 |
| 17004447 |                |                                                                   | -0.2288 | 0.0341 |
| 17004450 | LOC100507506   | uncharacterized LOC100507506                                      | -0.3348 | 0.001  |
| 17004491 | LOC100129461   | uncharacterized LOC100129461                                      | -0.3452 | 0.0252 |
| 17004497 | PPP1R3G        | protein phosphatase 1, regulatory subunit 3G                      | -0.647  | 0.0325 |
| 17004866 |                |                                                                   | -0.9509 | 0.0075 |
| 17004879 | HIVP1          | human immunodeficiency virus type I enhancer binding protein 1    | -0.5379 | 0.001  |
| 17004987 |                |                                                                   | -0.8786 | 0.0023 |
| 17005001 | CD83           | CD83 molecule                                                     | -1.5106 | 0      |
| 17005009 |                |                                                                   | -1.1637 | 0      |
| 17005011 | LOC100506631   | uncharacterized LOC100506631                                      | -0.2398 | 0.0276 |
| 17005023 |                |                                                                   | -0.3937 | 0.0173 |
| 17005042 | JARID2         | jumonji, AT rich interactive domain 2                             | -0.4155 | 0.0242 |
| 17005108 |                |                                                                   | -0.1935 | 0.0387 |
| 17005169 | KDM1B          | lysine (K)-specific demethylase 1B                                | -0.476  | 0.0497 |
| 17005420 | LRRC16A        | leucine rich repeat containing 16A                                | -0.4856 | 0.0353 |
| 17005532 | HIST1H3A       | histone cluster 1, H3a                                            | -0.431  | 0.0456 |
| 17005589 | HIST1H2AE      | histone cluster 1, H2ae                                           | -0.617  | 0.0114 |
| 17005593 | HIST1H3E       | histone cluster 1, H3e                                            | -0.7441 | 0.0316 |
| 17005784 |                |                                                                   | -0.1987 | 0.0012 |
| 17005790 | HIST2H4B       | histone cluster 2, H4b                                            | -0.2424 | 0.0294 |
| 17005838 | LOC100507173   | uncharacterized LOC100507173                                      | -0.1666 | 0.0455 |
| 17005844 |                |                                                                   | -0.3489 | 0.0303 |
| 17005858 | HIST1H2AI      | histone cluster 1, H2ai                                           | -0.9371 | 0.028  |
| 17005871 | HIST1H2BN      | histone cluster 1, H2bn                                           | -0.9995 | 0.0016 |
| 17005904 | ZNF192         | zinc finger protein 192                                           | -0.2802 | 0.0372 |
| 17006030 |                |                                                                   | -0.1323 | 0.047  |
| 17006159 | HCG9           | HLA complex group 9 (non-protein coding)                          | -0.1878 | 0.0164 |
| 17006276 | PRR3           | proline rich 3                                                    | -0.4183 | 0.0011 |
| 17006291 |                |                                                                   | -0.1498 | 0.0386 |
| 17006309 |                |                                                                   | -0.5496 | 0.0377 |
| 17006374 | MDC1-AS1       | MDC1 antisense RNA 1 (non-protein coding)                         | -0.1936 | 0.0442 |
| 17006696 | PRRC2A         | proline-rich coiled-coil 2A                                       | -0.3079 | 0.0147 |
| 17007029 | STK19          | serine/threonine kinase 19                                        | -0.3507 | 0.0146 |
| 17007109 | CYP21A1P       | cytochrome P450, family 21, subfamily A, polypeptide 1 pseudogene | -1.3012 | 0.001  |
| 17007178 | CYP21A2        | cytochrome P450, family 21, subfamily A, polypeptide 2            | -1.2775 | 0.0068 |
| 17007426 | RPS18          | ribosomal protein S18                                             | -0.1607 | 0.0318 |
| 17007617 |                |                                                                   | -0.1733 | 0.0098 |
| 17007824 | FANCE          | Fanconi anemia, complementation group E                           | -0.1746 | 0.0237 |
| 17007853 | ARMC12         | armadillo repeat containing 12                                    | -0.1807 | 0.0206 |
| 17007965 | KCTD20         | potassium channel tetramerisation domain containing 20            | -0.4187 | 0.0165 |
| 17007996 | SRSF3          | serine/arginine-rich splicing factor 3                            | -0.2292 | 0.0307 |
| 17008341 | DAAM2          | dishevelled associated activator of morphogenesis 2               | -0.8211 | 0.0363 |



|          |              |                                                                          |         |        |
|----------|--------------|--------------------------------------------------------------------------|---------|--------|
| 17008544 | BYSL         | bystin-like                                                              | -0.3971 | 0.0005 |
| 17008769 | RRP36        | ribosomal RNA processing 36 homolog ( <i>S. cerevisiae</i> )             | -0.5887 | 0.0017 |
| 17009008 | TJAP1        | tight junction associated protein 1 (peripheral)                         | -0.2721 | 0.0099 |
| 17009032 | POLR1C       | polymerase (RNA) I polypeptide C, 30kDa                                  | -0.2587 | 0.0317 |
| 17009054 | POLH         | polymerase (DNA directed), eta                                           | -0.3304 | 0.0147 |
| 17009093 | VEGFA        | vascular endothelial growth factor A                                     | -0.5568 | 0.0104 |
| 17009282 |              |                                                                          | -0.1486 | 0.0216 |
| 17009558 |              |                                                                          | -0.3584 | 0.0063 |
| 17009885 | LOC100653079 | uncharacterized LOC100653079                                             | -0.1576 | 0.0092 |
| 17009930 | PHF3         | PHD finger protein 3                                                     | -0.3279 | 0.0193 |
| 17010419 | SENPA6       | SUMO1/sentrin specific peptidase 6                                       | -0.2486 | 0.0336 |
| 17010552 | TTK          | TTK protein kinase                                                       | -0.8765 | 0.0163 |
| 17010789 | ZNF292       | zinc finger protein 292                                                  | -0.4292 | 0.0015 |
| 17010851 | SLC35A1      | solute carrier family 35 (CMP-sialic acid transporter), member A1        | -0.3523 | 0.0128 |
| 17010874 | C6orf165     | chromosome 6 open reading frame 165                                      | -0.3309 | 0.0132 |
| 17010876 | ORC3         | origin recognition complex, subunit 3                                    | -0.3239 | 0.0396 |
| 17010904 | AKIRIN2-AS1  | AKIRIN2 antisense RNA 1 (non-protein coding)                             | -0.8536 | 0.0003 |
| 17010929 | PNRC1        | proline-rich nuclear receptor coactivator 1                              | -0.3593 | 0.0247 |
| 17010991 | CASP8AP2     | caspase 8 associated protein 2                                           | -0.3604 | 0.0181 |
| 17011032 | MIR4643      | microRNA 4643                                                            | -0.5886 | 0.0397 |
| 17011182 |              |                                                                          | -0.2996 | 0.0456 |
| 17011340 | QRSL1        | glutaminyl-tRNA synthase (glutamine-hydrolyzing)-like 1                  | -0.3507 | 0.028  |
| 17011378 | SOBP         | sine oculis binding protein homolog ( <i>Drosophila</i> )                | -0.4686 | 0.0285 |
| 17011391 |              |                                                                          | -0.6679 | 0.0095 |
| 17011496 | CEP57L1      | centrosomal protein 57kDa-like 1                                         | -0.3472 | 0.0056 |
| 17011635 | CDC40        | cell division cycle 40 homolog ( <i>S. cerevisiae</i> )                  | -0.2997 | 0.0455 |
| 17011843 |              |                                                                          | -0.1728 | 0.0367 |
| 17011915 |              |                                                                          | -0.2669 | 0.0227 |
| 17012108 | ASF1A        | ASF1 anti-silencing function 1 homolog A ( <i>S. cerevisiae</i> )        | -0.5354 | 0.0012 |
| 17012127 |              |                                                                          | -0.3186 | 0.0209 |
| 17012130 |              |                                                                          | -0.5621 | 0.0371 |
| 17012165 | HSF2         | heat shock transcription factor 2                                        | -0.5751 | 0.0004 |
| 17012447 | LAMA2        | laminin, alpha 2                                                         | -1.1594 | 0.0092 |
| 17012559 | AKAP7        | A kinase (PRKA) anchor protein 7                                         | -0.6664 | 0.0052 |
| 17012598 | ENPP3        | ectonucleotide pyrophosphatase/phosphodiesterase 3                       | -2.0818 | 0      |
| 17012699 | RPS12        | ribosomal protein S12                                                    | -0.5098 | 0.0112 |
| 17012709 | SNORD100     | small nucleolar RNA, C/D box 100                                         | -0.5043 | 0.0269 |
| 17012859 | PDE7B        | phosphodiesterase 7B                                                     | -0.9182 | 0.0102 |
| 17013468 | STXBP5       | syntaxin binding protein 5 (tomosyn)                                     | -0.5951 | 0.0359 |
| 17013554 | UST          | uronyl-2-sulfotransferase                                                | -0.8252 | 0.0009 |
| 17013637 | LOC100652739 | uncharacterized LOC100652739                                             | -0.284  | 0.0292 |
| 17013670 |              |                                                                          | -0.3259 | 0.0021 |
| 17013837 | SYNE1-AS1    | SYNE1 antisense RNA 1 (non-protein coding)                               | -0.3497 | 0.0061 |
| 17013865 |              |                                                                          | -0.5055 | 0.0005 |
| 17013920 | SCAF8        | SR-related CTD-associated factor 8                                       | -0.3658 | 0.0044 |
| 17014004 | CLDN20       | claudin 20                                                               | -0.3405 | 0.0417 |
| 17014015 | MIR1202      | microRNA 1202                                                            | -0.1489 | 0.0252 |
| 17014031 | ARID1B       | AT rich interactive domain 1B (SWI1-like)                                | -0.3934 | 0.0002 |
| 17014091 | SNX9         | sorting nexin 9                                                          | -0.2196 | 0.0293 |
| 17014166 |              |                                                                          | -0.611  | 0.022  |
| 17014186 | TMEM181      | transmembrane protein 181                                                | -0.3997 | 0.0095 |
| 17014235 | C6orf99      | chromosome 6 open reading frame 99                                       | -0.263  | 0.0102 |
| 17014309 | ACAT2        | acetyl-CoA acetyltransferase 2                                           | -1.4076 | 0.0013 |
| 17014442 | SLC22A3      | solute carrier family 22 (extraneuronal monoamine transporter), member 3 | -0.918  | 0.0042 |
| 17014562 | QKI          | QKI, KH domain containing, RNA binding                                   | -0.2819 | 0.0219 |
| 17014605 |              |                                                                          | -0.2912 | 0.006  |
| 17014608 | LINC00602    | long intergenic non-protein coding RNA 602                               | -0.3391 | 0.007  |
| 17014630 | FGFR1OP      | FGFR1 oncogene partner                                                   | -0.3739 | 0.0063 |
| 17014835 |              |                                                                          | -0.2044 | 0.0476 |

|          |                 |                                                            |         |        |
|----------|-----------------|------------------------------------------------------------|---------|--------|
| 17014906 | FAM120B         | family with sequence similarity 120B                       | -0.1957 | 0.0343 |
| 17015240 | ECI2            | enoyl-CoA delta isomerase 2                                | -0.467  | 0.01   |
| 17015277 | RPP40           | ribonuclease P/MRP 40kDa subunit                           | -0.5597 | 0.0063 |
| 17015291 |                 |                                                            | -0.5822 | 0.0025 |
| 17015752 | RANBP9          | RAN binding protein 9                                      | -0.5515 | 0.0027 |
| 17015791 |                 |                                                            | -0.2024 | 0.0409 |
| 17015862 | ATXN1           | ataxin 1                                                   | -0.3912 | 0.0399 |
| 17015975 | TPMT            | thiopurine S-methyltransferase                             | -0.6286 | 0.0141 |
| 17015987 | DEK             | DEK oncogene                                               | -0.3671 | 0.0034 |
| 17016064 |                 |                                                            | -0.4857 | 0.0369 |
| 17016085 | LOC729177       | uncharacterized LOC729177                                  | -0.3678 | 0.0294 |
| 17016221 | FAM65B          | family with sequence similarity 65, member B               | -0.4936 | 0.0136 |
| 17016363 | HIST1H3B        | histone cluster 1, H3b                                     | -0.7996 | 0.0087 |
| 17016366 | HIST1H2AB       | histone cluster 1, H2ab                                    | -0.4562 | 0.0138 |
| 17016400 | HIST1H3F        | histone cluster 1, H3f                                     | -1.0534 | 0.0222 |
| 17016403 | HIST1H3G        | histone cluster 1, H3g                                     | -1.2363 | 0.0179 |
| 17016406 | HIST2H4B        | histone cluster 2, H4b                                     | -0.5746 | 0.0156 |
| 17016444 | LOC100270746    | uncharacterized LOC100270746                               | -0.2835 | 0.0223 |
| 17016457 | HIST1H2BK       | histone cluster 1, H2bk                                    | -0.9443 | 0.0004 |
| 17016568 | ZSCAN12         | zinc finger and SCAN domain containing 12                  | -0.3057 | 0.0191 |
| 17016888 | PPP1R10         | protein phosphatase 1, regulatory subunit 10               | -0.3073 | 0.0121 |
| 17016966 | MDC1            | mediator of DNA-damage checkpoint 1                        | -0.2325 | 0.0288 |
| 17017172 | ATP6V1G2-DDX39B | ATP6V1G2-DDX39B readthrough (non-protein coding)           | -0.2665 | 0.0199 |
| 17017184 |                 |                                                            | -0.8867 | 0.0288 |
| 17017187 |                 |                                                            | -0.2593 | 0.0354 |
| 17017194 |                 |                                                            | -0.5315 | 0.002  |
| 17017196 |                 |                                                            | -0.4787 | 0.0184 |
| 17017198 |                 |                                                            | -0.6109 | 0.0066 |
| 17017201 |                 |                                                            | -0.8352 | 0.0119 |
| 17017219 | SNORD117        | small nucleolar RNA, C/D box 117                           | -0.5035 | 0.0056 |
| 17017220 |                 |                                                            | -0.5035 | 0.0056 |
| 17017510 | SLC44A4         | solute carrier family 44, member 4                         | -1.2399 | 0.001  |
| 17017622 | C4A-AS1         | C4A antisense RNA 1 (non-protein coding)                   | -0.6426 | 0.0143 |
| 17017625 | TNXA            | tenascin XA (pseudogene)                                   | -1.0146 | 0.0001 |
| 17017638 | C4A-AS1         | C4A antisense RNA 1 (non-protein coding)                   | -0.6426 | 0.0143 |
| 17017641 | TNXB            | tenascin XB                                                | -0.3642 | 0.0117 |
| 17018186 | RGL2            | ral guanine nucleotide dissociation stimulator-like 2      | -0.2764 | 0.0021 |
| 17018240 | DAXX            | death-domain associated protein                            | -0.237  | 0.025  |
| 17018395 |                 |                                                            | -0.9015 | 0.0143 |
| 17019134 | USP49           | ubiquitin specific peptidase 49                            | -0.2121 | 0.0319 |
| 17019199 | GUCA1B          | guanylate cyclase activator 1B (retina)                    | -0.2835 | 0.018  |
| 17019389 | LRRC73          | leucine rich repeat containing 73                          | -0.3405 | 0.034  |
| 17019425 | XPO5            | exportin 5                                                 | -0.6131 | 0      |
| 17019484 | GTPBP2          | GTP binding protein 2                                      | -0.2587 | 0.0325 |
| 17019516 | MRPS18A         | mitochondrial ribosomal protein S18A                       | -0.3577 | 0.0028 |
| 17019549 | MRPL14          | mitochondrial ribosomal protein L14                        | -0.4225 | 0.008  |
| 17019574 | TCTE1           | t-complex-associated-testis-expressed 1                    | -0.1678 | 0.0463 |
| 17020019 | MCM3            | minichromosome maintenance complex component 3             | -0.4491 | 0.0193 |
| 17020103 | GSTA4           | glutathione S-transferase alpha 4                          | -0.564  | 0.0141 |
| 17020118 | ICK             | intestinal cell (MAK-like) kinase                          | -0.5593 | 0.0265 |
| 17020152 | ELOVL5          | ELOVL fatty acid elongase 5                                | -0.5069 | 0.0043 |
| 17020174 | GCLC            | glutamate-cysteine ligase, catalytic subunit               | -0.437  | 0.0002 |
| 17020727 | MIR30A          | microRNA 30a                                               | -0.3117 | 0.0164 |
| 17021108 |                 |                                                            | -0.4151 | 0.0242 |
| 17021122 | IBTK            | inhibitor of Bruton agammaglobulinemia tyrosine kinase     | -0.3875 | 0.0056 |
| 17021162 |                 |                                                            | -0.3823 | 0.0441 |
| 17021217 | ME1             | malic enzyme 1, NADP(+)-dependent, cytosolic               | -0.5892 | 0.0106 |
| 17021323 | TBX18           | T-box 18                                                   | -0.6679 | 0.0213 |
| 17021385 | SYNCRIP         | synaptotagmin binding, cytoplasmic RNA interacting protein | -0.285  | 0.0088 |

|          |              |                                                                                               |         |        |
|----------|--------------|-----------------------------------------------------------------------------------------------|---------|--------|
| 17021452 | RARS2        | arginyl-tRNA synthetase 2, mitochondrial                                                      | -0.6638 | 0.0004 |
| 17021478 | AKIRIN2      | akirin 2                                                                                      | -0.7647 | 0      |
| 17021485 |              |                                                                                               | -0.3413 | 0.0327 |
| 17021628 | MDN1         | MDN1, midasin homolog (yeast)                                                                 | -0.25   | 0.0216 |
| 17021778 |              |                                                                                               | -0.4482 | 0.0158 |
| 17021824 | UFL1-AS1     | UFL1 antisense RNA 1 (non-protein coding)                                                     | -0.2325 | 0.0381 |
| 17021978 | CCNC         | cyclin C                                                                                      | -0.3204 | 0.0212 |
| 17022295 | SEC63        | SEC63 homolog (S. cerevisiae)                                                                 | -0.2545 | 0.0248 |
| 17022384 |              |                                                                                               | -0.694  | 0.034  |
| 17022623 | REV3L        | REV3-like, polymerase (DNA directed), zeta, catalytic subunit                                 | -0.508  | 0.001  |
| 17022736 | TUBE1        | tubulin, epsilon 1                                                                            | -0.7044 | 0.0009 |
| 17022754 | LAMA4        | laminin, alpha 4                                                                              | -0.6707 | 0.0068 |
| 17022834 |              |                                                                                               | -0.4248 | 0.0178 |
| 17022854 | HDAC2        | histone deacetylase 2                                                                         | -0.2729 | 0.0299 |
| 17022929 | COL10A1      | collagen, type X, alpha 1                                                                     | -0.2825 | 0.045  |
| 17022939 | TSPYL4       | TSPY-like 4                                                                                   | -0.3392 | 0.0063 |
| 17022964 | ZUFSP        | zinc finger with UFM1-specific peptidase domain                                               | -0.4417 | 0.0073 |
| 17022987 | GPRC6A       | G protein-coupled receptor, family C, group 6, member A                                       | -0.9472 | 0.0354 |
| 17023066 | CEP85L       | centrosomal protein 85kDa-like                                                                | -0.2723 | 0.0488 |
| 17023484 | ARHGAP18     | Rho GTPase activating protein 18                                                              | -0.4338 | 0.0171 |
| 17023592 | MED23        | mediator complex subunit 23                                                                   | -0.2121 | 0.0425 |
| 17023636 |              |                                                                                               | -0.3177 | 0.0053 |
| 17023638 | OR2A4        | olfactory receptor, family 2, subfamily A, member 4                                           | -0.5526 | 0.0092 |
| 17023927 | AHI1         | Abelson helper integration site 1                                                             | -0.323  | 0.0262 |
| 17024002 | FAM54A       | family with sequence similarity 54, member A                                                  | -0.3787 | 0.0045 |
| 17024020 | BCLAF1       | BCL2-associated transcription factor 1                                                        | -0.255  | 0.0076 |
| 17024168 |              |                                                                                               | -2.2175 | 0.0019 |
| 17024362 | ADAT2        | adenosine deaminase, tRNA-specific 2                                                          | -0.312  | 0.0079 |
| 17024452 | SHPRH        | SNF2 histone linker PHD RING helicase, E3 ubiquitin protein ligase                            | -0.2767 | 0.0125 |
| 17024549 | LOC100128176 | uncharacterized LOC100128176                                                                  | -0.5716 | 0.0019 |
| 17024599 | KATNA1       | katanin p60 (ATPase containing) subunit A 1                                                   | -0.4714 | 0.0071 |
| 17024615 | LATS1        | LATS, large tumor suppressor, homolog 1 (Drosophila)                                          | -0.4016 | 0.0002 |
| 17024653 | LRP11        | low density lipoprotein receptor-related protein 11                                           | -0.7417 | 0.0007 |
| 17024667 | LOC100507624 | uncharacterized LOC100507624                                                                  | -0.9209 | 0.003  |
| 17024669 | RAET1E       | retinoic acid early transcript 1E                                                             | -0.8056 | 0.0013 |
| 17024685 |              |                                                                                               | -0.7944 | 0.0054 |
| 17024746 | ZBTB2        | zinc finger and BTB domain containing 2                                                       | -0.4326 | 0.0145 |
| 17024775 | SYNE1        | spectrin repeat containing, nuclear envelope 1                                                | -0.635  | 0.0042 |
| 17024980 | FBXO5        | F-box protein 5                                                                               | -0.6929 | 0.0015 |
| 17025068 |              |                                                                                               | -0.2627 | 0.0453 |
| 17025070 | TFB1M        | transcription factor B1, mitochondrial                                                        | -0.3563 | 0.0162 |
| 17025130 | TMEM242      | transmembrane protein 242                                                                     | -0.4231 | 0.0042 |
| 17025144 |              |                                                                                               | -0.1982 | 0.0397 |
| 17025152 | SERAC1       | serine active site containing 1                                                               | -0.6336 | 0.0001 |
| 17025294 | LOC100129518 | uncharacterized LOC100129518                                                                  | -1.0528 | 0.003  |
| 17025359 | LPA          | lipoprotein, Lp(a)                                                                            | -0.4121 | 0.022  |
| 17025417 | AGPAT4       | 1-acylglycerol-3-phosphate O-acyltransferase 4 (lysophosphatidic acid acyltransferase, delta) | -0.4274 | 0.0335 |
| 17025487 | CAHM         | colon adenocarcinoma hypermethylated (non-protein coding)                                     | -0.4829 | 0.0021 |
| 17025551 |              |                                                                                               | -0.4487 | 0.0281 |
| 17025558 |              |                                                                                               | -0.8894 | 0.0038 |
| 17025560 | SDIM1        | stress responsive DNAJB4 interacting membrane protein 1                                       | -0.8195 | 0.0058 |
| 17025564 | LINC00473    | long intergenic non-protein coding RNA 473                                                    | -1.3586 | 0.0003 |
| 17025844 | THBS2        | thrombospondin 2                                                                              | -0.6932 | 0.0476 |
| 17025937 | PHF10        | PHD finger protein 10                                                                         | -0.5105 | 0.0168 |
| 17025953 |              |                                                                                               | -0.3972 | 0.0252 |
| 17025982 |              |                                                                                               | -0.1704 | 0.0417 |

|          |          |                                                        |         |        |
|----------|----------|--------------------------------------------------------|---------|--------|
| 17025989 | DLL1     | delta-like 1 (Drosophila)                              | -0.3045 | 0.0397 |
| 17026056 |          |                                                        | -0.1654 | 0.0355 |
| 17026207 | MDC1     | mediator of DNA-damage checkpoint 1                    | -0.1936 | 0.0442 |
| 17026668 | DHX16    | DEAH (Asp-Glu-Ala-His) box polypeptide 16              | -0.1993 | 0.031  |
| 17026706 | MDC1     | mediator of DNA-damage checkpoint 1                    | -0.2278 | 0.0269 |
| 17026760 | SNORD117 | small nucleolar RNA, C/D box 117                       | -0.5184 | 0.0071 |
| 17026890 | SLC44A4  | solute carrier family 44, member 4                     | -1.2633 | 0.0009 |
| 17027243 |          |                                                        | -0.1323 | 0.047  |
| 17027360 | HCG9     | HLA complex group 9 (non-protein coding)               | -0.1878 | 0.0164 |
| 17027459 | PRR3     | proline rich 3                                         | -0.4507 | 0.0009 |
| 17027555 | MDC1     | mediator of DNA-damage checkpoint 1                    | -0.1936 | 0.0442 |
| 17027830 | PRRC2A   | proline-rich coiled-coil 2A                            | -0.3047 | 0.0152 |
| 17028041 | C6orf48  | chromosome 6 open reading frame 48                     | -0.4125 | 0.0386 |
| 17028157 | STK19    | serine/threonine kinase 19                             | -0.3001 | 0.0275 |
| 17028240 | CYP21A2  | cytochrome P450, family 21, subfamily A, polypeptide 2 | -1.3939 | 0.009  |
| 17028475 | RPS18    | ribosomal protein S18                                  | -0.1607 | 0.0318 |
| 17028781 | PPP1R10  | protein phosphatase 1, regulatory subunit 10           | -0.3144 | 0.0132 |
| 17028857 | MDC1     | mediator of DNA-damage checkpoint 1                    | -0.2002 | 0.0493 |
| 17029036 | SNORD84  | small nucleolar RNA, C/D box 84                        | -0.2938 | 0.0236 |
| 17029076 | SNORD117 | small nucleolar RNA, C/D box 117                       | -0.5184 | 0.0071 |
| 17029363 | SLC44A4  | solute carrier family 44, member 4                     | -1.2399 | 0.001  |
| 17029475 | C4A-AS1  | C4A antisense RNA 1 (non-protein coding)               | -0.6426 | 0.0143 |
| 17029997 | RGL2     | ral guanine nucleotide dissociation stimulator-like 2  | -0.2764 | 0.0021 |
| 17030053 | DAXX     | death-domain associated protein                        | -0.2642 | 0.0114 |
| 17030090 |          |                                                        | -0.1323 | 0.047  |
| 17030203 | HCG9     | HLA complex group 9 (non-protein coding)               | -0.1878 | 0.0164 |
| 17030304 | PRR3     | proline rich 3                                         | -0.4507 | 0.0009 |
| 17030400 | MDC1     | mediator of DNA-damage checkpoint 1                    | -0.1936 | 0.0442 |
| 17030577 | MICB     | MHC class I polypeptide-related sequence B             | -0.2926 | 0.0167 |
| 17030589 | MCCD1    | mitochondrial coiled-coil domain 1                     | -0.1033 | 0.0222 |
| 17030655 | PRRC2A   | proline-rich coiled-coil 2A                            | -0.3124 | 0.0146 |
| 17031103 | CYP21A2  | cytochrome P450, family 21, subfamily A, polypeptide 2 | -1.3984 | 0.009  |
| 17031289 | RPS18    | ribosomal protein S18                                  | -0.1607 | 0.0318 |
| 17031560 | PPP1R10  | protein phosphatase 1, regulatory subunit 10           | -0.3144 | 0.0132 |
| 17031635 | MDC1     | mediator of DNA-damage checkpoint 1                    | -0.2278 | 0.0269 |
| 17031824 | DDX39B   | DEAD (Asp-Glu-Ala-Asp) box polypeptide 39B             | -0.3234 | 0.0221 |
| 17031845 | SNORD117 | small nucleolar RNA, C/D box 117                       | -0.5184 | 0.0071 |
| 17031847 | SNORD84  | small nucleolar RNA, C/D box 84                        | -0.2378 | 0.0357 |
| 17031857 | SNORD84  | small nucleolar RNA, C/D box 84                        | -0.3237 | 0.0222 |
| 17031933 | GPANK1   | G patch domain and ankyrin repeats 1                   | -0.1657 | 0.0168 |
| 17032149 | SLC44A4  | solute carrier family 44, member 4                     | -1.2399 | 0.001  |
| 17032261 | C4A-AS1  | C4A antisense RNA 1 (non-protein coding)               | -0.6426 | 0.0143 |
| 17032264 |          |                                                        | -0.6575 | 0.0001 |
| 17032681 | RGL2     | ral guanine nucleotide dissociation stimulator-like 2  | -0.2764 | 0.0021 |
| 17032737 | DAXX     | death-domain associated protein                        | -0.2642 | 0.0114 |
| 17032779 |          |                                                        | -0.1323 | 0.047  |
| 17032900 | HCG9     | HLA complex group 9 (non-protein coding)               | -0.1946 | 0.01   |
| 17033009 | PRR3     | proline rich 3                                         | -0.4183 | 0.0011 |
| 17033105 | MDC1     | mediator of DNA-damage checkpoint 1                    | -0.1936 | 0.0442 |
| 17033306 | MCCD1    | mitochondrial coiled-coil domain 1                     | -0.1033 | 0.0222 |
| 17033360 | PRRC2A   | proline-rich coiled-coil 2A                            | -0.3039 | 0.015  |
| 17033974 | HCG18    | HLA complex group 18 (non-protein coding)              | -0.3296 | 0.0332 |
| 17034014 | PPP1R10  | protein phosphatase 1, regulatory subunit 10           | -0.3073 | 0.0121 |
| 17034176 |          |                                                        | -0.213  | 0.0097 |
| 17034296 | SNORD84  | small nucleolar RNA, C/D box 84                        | -0.3481 | 0.0117 |
| 17034317 | SNORD117 | small nucleolar RNA, C/D box 117                       | -0.5184 | 0.0071 |
| 17034319 | SNORD84  | small nucleolar RNA, C/D box 84                        | -0.2378 | 0.0357 |
| 17034329 | SNORD84  | small nucleolar RNA, C/D box 84                        | -0.3237 | 0.0222 |
| 17035060 | HCG9     | HLA complex group 9 (non-protein coding)               | -0.1967 | 0.0231 |
| 17035129 | PRR3     | proline rich 3                                         | -0.4183 | 0.0011 |
| 17035225 | MDC1     | mediator of DNA-damage checkpoint 1                    | -0.1936 | 0.0442 |

|          |                 |                                                                          |         |        |
|----------|-----------------|--------------------------------------------------------------------------|---------|--------|
| 17035453 | PRRC2A          | proline-rich coiled-coil 2A                                              | -0.3077 | 0.0162 |
| 17035730 | STK19           | serine/threonine kinase 19                                               | -0.3001 | 0.0275 |
| 17035809 | CYP21A2         | cytochrome P450, family 21, subfamily A, polypeptide 2                   | -1.3992 | 0.0088 |
| 17036038 | RPS18           | ribosomal protein S18                                                    | -0.1606 | 0.0361 |
| 17036281 | PPP1R10         | protein phosphatase 1, regulatory subunit 10                             | -0.3073 | 0.0121 |
| 17036357 | MDC1            | mediator of DNA-damage checkpoint 1                                      | -0.2002 | 0.0493 |
| 17036426 |                 |                                                                          | -0.213  | 0.0097 |
| 17036519 | ATP6V1G2-DDX39B | ATP6V1G2-DDX39B readthrough (non-protein coding)                         | -0.2182 | 0.0475 |
| 17036544 | DDX39B          | DEAD (Asp-Glu-Ala-Asp) box polypeptide 39B                               | -0.3234 | 0.0221 |
| 17036565 | SNORD117        | small nucleolar RNA, C/D box 117                                         | -0.5184 | 0.0071 |
| 17036567 | SNORD84         | small nucleolar RNA, C/D box 84                                          | -0.2378 | 0.0357 |
| 17036577 | SNORD84         | small nucleolar RNA, C/D box 84                                          | -0.3237 | 0.0222 |
| 17036856 | SLC44A4         | solute carrier family 44, member 4                                       | -1.2633 | 0.0009 |
| 17036968 | C4A-AS1         | C4A antisense RNA 1 (non-protein coding)                                 | -0.6426 | 0.0143 |
| 17037482 | RGL2            | ral guanine nucleotide dissociation stimulator-like 2                    | -0.2764 | 0.0021 |
| 17037538 | DAXX            | death-domain associated protein                                          | -0.272  | 0.0148 |
| 17037693 | ZNRD1           | zinc ribbon domain containing 1                                          | -0.4241 | 0.0228 |
| 17037788 | PRR3            | proline rich 3                                                           | -0.4507 | 0.0009 |
| 17037884 | MDC1            | mediator of DNA-damage checkpoint 1                                      | -0.322  | 0.0217 |
| 17038086 | MCCD1           | mitochondrial coiled-coil domain 1                                       | -0.1033 | 0.0222 |
| 17038153 | PRRC2A          | proline-rich coiled-coil 2A                                              | -0.3047 | 0.0152 |
| 17038330 | CYP21A2         | cytochrome P450, family 21, subfamily A, polypeptide 2                   | -1.3795 | 0.0097 |
| 17038759 | RPS18           | ribosomal protein S18                                                    | -0.1607 | 0.0318 |
| 17038792 | KIFC1           | kinesin family member C1                                                 | -0.3305 | 0.0461 |
| 17039057 | PPP1R10         | protein phosphatase 1, regulatory subunit 10                             | -0.3144 | 0.0132 |
| 17039133 | MDC1            | mediator of DNA-damage checkpoint 1                                      | -0.2659 | 0.022  |
| 17039337 | DDX39B          | DEAD (Asp-Glu-Ala-Asp) box polypeptide 39B                               | -0.3234 | 0.0221 |
| 17039358 | SNORD117        | small nucleolar RNA, C/D box 117                                         | -0.5184 | 0.0071 |
| 17039360 | SNORD84         | small nucleolar RNA, C/D box 84                                          | -0.2378 | 0.0357 |
| 17039370 | SNORD84         | small nucleolar RNA, C/D box 84                                          | -0.3237 | 0.0222 |
| 17039600 | SLC44A4         | solute carrier family 44, member 4                                       | -1.2559 | 0.0006 |
| 17039711 | C4A-AS1         | C4A antisense RNA 1 (non-protein coding)                                 | -0.6426 | 0.0143 |
| 17039714 | TNXB            | tenascin XB                                                              | -0.5015 | 0.0085 |
| 17040192 | RGL2            | ral guanine nucleotide dissociation stimulator-like 2                    | -0.2923 | 0.0013 |
| 17040248 | DAXX            | death-domain associated protein                                          | -0.2586 | 0.0162 |
| 17040293 |                 |                                                                          | -0.1323 | 0.047  |
| 17040405 | HCG9            | HLA complex group 9 (non-protein coding)                                 | -0.1946 | 0.01   |
| 17040502 | PRR3            | proline rich 3                                                           | -0.4507 | 0.0009 |
| 17040598 | MDC1            | mediator of DNA-damage checkpoint 1                                      | -0.1936 | 0.0442 |
| 17040662 |                 |                                                                          | -0.3724 | 0.0211 |
| 17040748 | PRRC2A          | proline-rich coiled-coil 2A                                              | -0.3047 | 0.0152 |
| 17041011 | STK19           | serine/threonine kinase 19                                               | -0.3001 | 0.0275 |
| 17041090 | CYP21A2         | cytochrome P450, family 21, subfamily A, polypeptide 2                   | -1.3927 | 0.0088 |
| 17041345 | RPS18           | ribosomal protein S18                                                    | -0.1843 | 0.037  |
| 17041641 | PPP1R10         | protein phosphatase 1, regulatory subunit 10                             | -0.3144 | 0.0132 |
| 17041700 | MDC1            | mediator of DNA-damage checkpoint 1                                      | -0.215  | 0.0326 |
| 17041815 | SNORD84         | small nucleolar RNA, C/D box 84                                          | -0.3022 | 0.0125 |
| 17041857 | SNORD117        | small nucleolar RNA, C/D box 117                                         | -0.5184 | 0.0071 |
| 17042117 | SLC44A4         | solute carrier family 44, member 4                                       | -1.2633 | 0.0009 |
| 17042216 | C4A-AS1         | C4A antisense RNA 1 (non-protein coding)                                 | -0.6426 | 0.0143 |
| 17042219 | C4A-AS1         | C4A antisense RNA 1 (non-protein coding)                                 | -0.6426 | 0.0143 |
| 17042222 | TNXB            | tenascin XB                                                              | -0.6757 | 0.0007 |
| 17042805 | GET4            | golgi to ER traffic protein 4 homolog (S. cerevisiae)                    | -0.4003 | 0.0118 |
| 17042824 | LOC100505531    | uncharacterized LOC100505531                                             | -0.3526 | 0.0382 |
| 17042841 |                 |                                                                          | -0.2152 | 0.0388 |
| 17042946 | EIF3B           | eukaryotic translation initiation factor 3, subunit B                    | -0.33   | 0.011  |
| 17043177 | SNORD13P2       | small nucleolar RNA, C/D box 13 pseudogene 2                             | -0.5599 | 0.0128 |
| 17043294 | FSCN1           | fascin homolog 1, actin-bundling protein (Strongylocentrotus purpuratus) | -0.9337 | 0.0038 |
| 17043355 | AIMP2           | aminoacyl tRNA synthetase complex-interacting multifunctional protein 2  | -0.3872 | 0.0001 |

|          |              |                                                                                       |         |        |
|----------|--------------|---------------------------------------------------------------------------------------|---------|--------|
| 17043367 | ANKRD61      | ankyrin repeat domain 61                                                              | -0.2453 | 0.0283 |
| 17043380 | USP42        | ubiquitin specific peptidase 42                                                       | -0.2447 | 0.0126 |
| 17044423 | CBX3         | chromobox homolog 3                                                                   | -0.4059 | 0.0148 |
| 17044426 |              |                                                                                       | -0.4717 | 0.0189 |
| 17044427 |              |                                                                                       | -0.7381 | 0.0133 |
| 17044428 |              |                                                                                       | -0.5003 | 0.005  |
| 17044431 |              |                                                                                       | -1.463  | 0.0001 |
| 17044432 |              |                                                                                       | -0.5406 | 0.003  |
| 17044438 |              |                                                                                       | -0.4909 | 0.0046 |
| 17044442 | SNX10        | sorting nexin 10                                                                      | -0.5646 | 0.0407 |
| 17044491 | HOXA-AS2     | HOXA cluster antisense RNA 2 (non-protein coding)                                     | -0.2395 | 0.0414 |
| 17044521 | HOXA11-AS    | HOXA11 antisense RNA (non-protein coding)                                             | -1.0225 | 0.0018 |
| 17044800 | GARS         | glycyl-tRNA synthetase                                                                | -0.2528 | 0.0447 |
| 17044929 | CCDC129      | coiled-coil domain containing 129                                                     | -0.2059 | 0.0274 |
| 17045198 | ANLN         | anillin, actin binding protein                                                        | -0.9489 | 0.0219 |
| 17045528 | HECW1-IT1    | HECW1 intronic transcript 1 (non-protein coding)                                      | -0.1416 | 0.0427 |
| 17045738 | PPIA         | peptidylprolyl isomerase A (cyclophilin A)                                            | -0.3915 | 0.0064 |
| 17046254 | CCT6A        | chaperonin containing TCP1, subunit 6A (zeta 1)                                       | -0.232  | 0.0237 |
| 17046458 | LOC641746    | glycine cleavage system protein H (aminomethyl carrier) pseudogene                    | -0.2583 | 0.0064 |
| 17046573 | CCT6P1       | chaperonin containing TCP1, subunit 6 (zeta) pseudogene 1                             | -0.2916 | 0.0215 |
| 17046595 | VKORC1L1     | vitamin K epoxide reductase complex, subunit 1-like 1                                 | -0.2523 | 0.0464 |
| 17046627 | CRCP         | CGRP receptor component                                                               | -0.2453 | 0.0365 |
| 17046673 |              |                                                                                       | -0.2431 | 0.0016 |
| 17046683 | RABGEF1      | RAB guanine nucleotide exchange factor (GEF) 1                                        | -0.268  | 0.0129 |
| 17046781 | AUTS2        | autism susceptibility candidate 2                                                     | -0.5115 | 0.0026 |
| 17047268 |              |                                                                                       | -0.2711 | 0.021  |
| 17047397 | RHBDD2       | rhomoid domain containing 2                                                           | -0.3928 | 0.034  |
| 17047411 | POR          | P450 (cytochrome) oxidoreductase                                                      | -0.4596 | 0.0041 |
| 17047965 | DBF4         | DBF4 homolog (S. cerevisiae)                                                          | -0.5222 | 0.001  |
| 17048473 | COL1A2       | collagen, type I, alpha 2                                                             | -0.6866 | 0.0253 |
| 17048563 | PEG10        | paternally expressed 10                                                               | -2.4602 | 0.0013 |
| 17048613 | ASB4         | ankyrin repeat and SOCS box containing 4                                              | -1.9237 | 0.0004 |
| 17048625 |              |                                                                                       | -0.5916 | 0.0488 |
| 17049003 | LOC100289187 | transmembrane protein 225-like                                                        | -0.3821 | 0.0063 |
| 17049090 | ZSCAN21      | zinc finger and SCAN domain containing 21                                             | -0.3422 | 0.0132 |
| 17049408 | PCOLCE       | procollagen C-endopeptidase enhancer                                                  | -1.011  | 0.0443 |
| 17049900 |              |                                                                                       | -0.1608 | 0.006  |
| 17049904 | LRRC17       | leucine rich repeat containing 17                                                     | -0.6627 | 0.0344 |
| 17049914 | NFE4         | transcription factor NF-E4                                                            | -0.8379 | 0.042  |
| 17050154 | PRKAR2B      | protein kinase, cAMP-dependent, regulatory, type II, beta                             | -1.0288 | 0.0011 |
| 17050443 |              |                                                                                       | -0.2212 | 0.0059 |
| 17050915 |              |                                                                                       | -0.2587 | 0.0313 |
| 17051626 | MEST         | mesoderm specific transcript homolog (mouse)                                          | -0.6411 | 0.0326 |
| 17052040 |              |                                                                                       | -0.525  | 0.0319 |
| 17052286 |              |                                                                                       | -0.1763 | 0.0308 |
| 17052728 | C7orf34      | chromosome 7 open reading frame 34                                                    | -0.1456 | 0.0145 |
| 17052737 | PIP          | prolactin-induced protein                                                             | -0.1474 | 0.0214 |
| 17053892 | INSIG1       | insulin induced gene 1                                                                | -0.9969 | 0.0147 |
| 17054203 |              |                                                                                       | -0.6928 | 0.0381 |
| 17054341 | MICALL2      | MICAL-like 2                                                                          | -0.2335 | 0.0339 |
| 17054611 |              |                                                                                       | -0.6292 | 0.0037 |
| 17054614 | GNA12        | guanine nucleotide binding protein (G protein) alpha 12                               | -0.1929 | 0.028  |
| 17054843 |              |                                                                                       | -0.9476 | 0.0033 |
| 17054846 | LOC100653350 | uncharacterized LOC100653350                                                          | -1.5164 | 0.0014 |
| 17055095 | CCZ1B        | CCZ1 vacuolar protein trafficking and biogenesis associated homolog B (S. cerevisiae) | -0.2636 | 0.0303 |
| 17055715 | RAPGEF5      | Rap guanine nucleotide exchange factor (GEF) 5                                        | -0.6135 | 0.0305 |
| 17055863 | TRA2A        | transformer 2 alpha homolog (Drosophila)                                              | -0.2118 | 0.041  |

|          |           |                                                               |         |        |
|----------|-----------|---------------------------------------------------------------|---------|--------|
| 17056031 | HNRNPA2B1 | heterogeneous nuclear ribonucleoprotein A2/B1                 | -0.2312 | 0.0312 |
| 17056160 | HOXA10    | homeobox A10                                                  | -0.2351 | 0.047  |
| 17056181 | HOXA11    | homeobox A11                                                  | -0.9204 | 0.0073 |
| 17056187 |           |                                                               | -0.6681 | 0.0019 |
| 17056192 | HOXA13    | homeobox A13                                                  | -0.6042 | 0.0371 |
| 17056198 |           |                                                               | -0.1968 | 0.0392 |
| 17056461 | LSM5      | LSM5 homolog, U6 small nuclear RNA associated (S. cerevisiae) | -0.2232 | 0.0449 |
| 17056493 | KBTBD2    | kelch repeat and BTB (POZ) domain containing 2                | -0.417  | 0      |
| 17056992 | GLI3      | GLI family zinc finger 3                                      | -0.5616 | 0.0319 |
| 17057130 |           |                                                               | -0.2589 | 0.036  |
| 17057174 | POLD2     | polymerase (DNA directed), delta 2, accessory subunit         | -0.3824 | 0.0147 |
| 17057329 | DDX56     | DEAD (Asp-Glu-Ala-Asp) box helicase 56                        | -0.2429 | 0.0281 |
| 17057378 | PURB      | purine-rich element binding protein B                         | -0.5285 | 0.0001 |
| 17057424 | NACAD     | NAC alpha domain containing                                   | -0.255  | 0.0302 |
| 17057677 |           |                                                               | -0.3042 | 0.0003 |
| 17057884 | SEC61G    | Sec61 gamma subunit                                           | -0.1925 | 0.0245 |
| 17058226 | LOC493754 | RAB guanine nucleotide exchange factor (GEF) 1 pseudogene     | -0.5195 | 0.0002 |
| 17058245 |           |                                                               | -0.2504 | 0.0454 |
| 17058351 | SPDYE7P   | speedy homolog E7 (Xenopus laevis), pseudogene                | -0.2407 | 0.0294 |
| 17058891 | STYXL1    | serine/threonine/tyrosine interacting-like 1                  | -0.4286 | 0.0417 |
| 17058960 |           |                                                               | -0.3086 | 0.0226 |
| 17059451 | ABCB4     | ATP-binding cassette, sub-family B (MDR/TAP), member 4        | -1.1315 | 0.0048 |
| 17059628 | CYP51A1   | cytochrome P450, family 51, subfamily A, polypeptide 1        | -0.8194 | 0.0025 |
| 17059756 | CDK6      | cyclin-dependent kinase 6                                     | -0.8126 | 0.0036 |
| 17059869 |           |                                                               | -0.8916 | 0.0127 |
| 17059872 | SGCE      | sarcoglycan, epsilon                                          | -1.3786 | 0      |
| 17059932 | PON2      | paraoxonase 2                                                 | -0.3899 | 0.0163 |
| 17060057 |           |                                                               | -0.3301 | 0.0378 |
| 17060186 | SMURF1    | SMAD specific E3 ubiquitin protein ligase 1                   | -0.5169 | 0.0077 |
| 17060412 | MCM7      | minichromosome maintenance complex component 7                | -0.3895 | 0.046  |
| 17060677 | TFR2      | transferrin receptor 2                                        | -0.3372 | 0.04   |
| 17060824 | VGF       | VGF nerve growth factor inducible                             | -0.6765 | 0.0322 |
| 17060894 | CLDN15    | claudin 15                                                    | -0.2069 | 0.0196 |
| 17061048 | UPK3BL    | uropod protein 3B-like                                        | -0.2623 | 0.0223 |
| 17061097 | RASA4     | RAS p21 protein activator 4                                   | -0.5345 | 0.0434 |
| 17061106 | RASA4     | RAS p21 protein activator 4                                   | -0.3802 | 0.0375 |
| 17061133 | RASA4     | RAS p21 protein activator 4                                   | -0.1425 | 0.0149 |
| 17061588 |           |                                                               | -0.5734 | 0.0378 |
| 17062253 |           |                                                               | -0.6408 | 0.0291 |
| 17062274 |           |                                                               | -0.1334 | 0.0493 |
| 17062578 | MIR592    | microRNA 592                                                  | -0.1188 | 0.0209 |
| 17062679 | IMPDH1    | IMP (inosine 5'-monophosphate) dehydrogenase 1                | -0.521  | 0.0012 |
| 17063428 | ZC3HAV1   | zinc finger CCCH-type, antiviral 1                            | -0.3507 | 0.0032 |
| 17063573 | RN5S248   | RNA, 5S ribosomal 248                                         | -0.2094 | 0.0465 |
| 17064105 | EZH2      | enhancer of zeste homolog 2 (Drosophila)                      | -0.554  | 0.0182 |
| 17064932 | MIR153-2  | microRNA 153-2                                                | -0.4624 | 0.0288 |
| 17064984 | ESYT2     | extended synaptotagmin-like protein 2                         | -0.4306 | 0.0047 |
| 17065215 |           |                                                               | -0.2193 | 0.0144 |
| 17065219 | KBTBD11   | kelch repeat and BTB (POZ) domain containing 11               | -0.2853 | 0.0367 |
| 17065811 | FDFT1     | farnesyl-diphosphate farnesyltransferase 1                    | -0.8579 | 0.0058 |
| 17065933 |           |                                                               | -0.7696 | 0.0033 |
| 17065992 | EFHA2     | EF-hand domain family, member A2                              | -0.6284 | 0.0069 |
| 17066013 |           |                                                               | -0.2875 | 0.0483 |
| 17066203 | NSAP11    | nervous system abundant protein 11                            | -1.0556 | 0.0005 |
| 17066207 |           |                                                               | -0.7543 | 0.0068 |
| 17066209 |           |                                                               | -1.1321 | 0.0003 |
| 17066523 | BMP1      | bone morphogenetic protein 1                                  | -0.4937 | 0.0056 |
| 17066650 | SORBS3    | sorbin and SH3 domain containing 3                            | -0.3385 | 0.0019 |

|          |           |                                                                     |         |        |
|----------|-----------|---------------------------------------------------------------------|---------|--------|
| 17067102 | CDCA2     | cell division cycle associated 2                                    | -0.5041 | 0.0302 |
| 17067332 | ESCO2     | establishment of cohesion 1 homolog 2 (S. cerevisiae)               | -0.2814 | 0.0346 |
| 17067363 | ELP3      | elongation protein 3 homolog (S. cerevisiae)                        | -0.329  | 0.0064 |
| 17068061 |           |                                                                     | -0.3817 | 0.0348 |
| 17068136 |           |                                                                     | -0.2315 | 0.0295 |
| 17068365 |           |                                                                     | -0.213  | 0.0128 |
| 17068626 |           |                                                                     | -0.535  | 0.0173 |
| 17068782 | MCM4      | minichromosome maintenance complex component 4                      | -0.5527 | 0.0062 |
| 17068814 | UBE2V2    | ubiquitin-conjugating enzyme E2 variant 2                           | -0.3342 | 0.0105 |
| 17069037 |           |                                                                     | -0.7246 | 0.0469 |
| 17069515 |           |                                                                     | -0.1664 | 0.0253 |
| 17069605 | SGK3      | serum/glucocorticoid regulated kinase family, member 3              | -0.3585 | 0.0041 |
| 17069716 | RN5S268   | RNA, 5S ribosomal 268                                               | -0.439  | 0.0122 |
| 17070245 |           |                                                                     | -0.4465 | 0.0151 |
| 17070273 | ZBTB10    | zinc finger and BTB domain containing 10                            | -0.5431 | 0.0057 |
| 17070456 | CA2       | carbonic anhydrase II                                               | -1.1606 | 0      |
| 17070478 | REXO1L2P  | REX1, RNA exonuclease 1 homolog (S. cerevisiae)-like 2 (pseudogene) | -0.1512 | 0.0197 |
| 17070695 | LINC00534 | long intergenic non-protein coding RNA 534                          | -0.2163 | 0.0489 |
| 17071983 |           |                                                                     | -1.2977 | 0      |
| 17071994 |           |                                                                     | -0.2488 | 0.0236 |
| 17072313 | WDR67     | WD repeat domain 67                                                 | -0.3651 | 0.0261 |
| 17072371 |           |                                                                     | -0.6281 | 0.0192 |
| 17072375 | WDYHV1    | WDYHV motif containing 1                                            | -0.5685 | 0.0061 |
| 17072552 | SQLE      | squalene epoxidase                                                  | -1.4088 | 0.0028 |
| 17072620 |           |                                                                     | -0.3687 | 0.006  |
| 17072669 | MYC       | v-myc myelocytomatosis viral oncogene homolog (avian)               | -0.7043 | 0.0023 |
| 17072678 | PVT1      | Pvt1 oncogene (non-protein coding)                                  | -0.3548 | 0.0136 |
| 17072718 | PVT1      | Pvt1 oncogene (non-protein coding)                                  | -0.2772 | 0.0376 |
| 17072750 |           |                                                                     | -0.6369 | 0.0007 |
| 17072799 | PHF20L1   | PHD finger protein 20-like 1                                        | -0.3275 | 0.0429 |
| 17072958 |           |                                                                     | -0.2677 | 0.0312 |
| 17073039 |           |                                                                     | -0.3722 | 0.0035 |
| 17073054 | CHRAC1    | chromatin accessibility complex 1                                   | -0.241  | 0.0095 |
| 17073210 |           |                                                                     | -0.1319 | 0.0466 |
| 17073449 | BREA2     | breast cancer estrogen-induced apoptosis 2                          | -0.1818 | 0.045  |
| 17074313 | DEFA1B    | defensin, alpha 1B                                                  | -0.9265 | 0.0205 |
| 17074322 | DEFA1B    | defensin, alpha 1B                                                  | -0.9343 | 0.0181 |
| 17074544 |           |                                                                     | -0.1672 | 0.0015 |
| 17074840 | MIR3926-1 | microRNA 3926-1                                                     | -0.1761 | 0.0279 |
| 17074848 | DLC1      | deleted in liver cancer 1                                           | -1.0285 | 0.0001 |
| 17075112 | PSD3      | pleckstrin and Sec7 domain containing 3                             | -1.223  | 0      |
| 17075151 |           |                                                                     | -0.9917 | 0.0029 |
| 17075776 | PBK       | PDZ binding kinase                                                  | -1.3103 | 0.0034 |
| 17076046 | GTF2E2    | general transcription factor IIE, polypeptide 2, beta 34kDa         | -0.3032 | 0.0286 |
| 17076125 |           |                                                                     | -0.1834 | 0.0253 |
| 17076265 |           |                                                                     | -0.318  | 0.0102 |
| 17076488 |           |                                                                     | -0.6078 | 0.021  |
| 17076510 |           |                                                                     | -0.3182 | 0.0407 |
| 17076606 |           |                                                                     | -0.3566 | 0.0044 |
| 17076621 |           |                                                                     | -0.4027 | 0.0429 |
| 17076857 |           |                                                                     | -0.6391 | 0.0121 |
| 17076976 |           |                                                                     | -0.282  | 0.0043 |
| 17077222 | TCEA1     | transcription elongation factor A (SII), 1                          | -0.2323 | 0.0385 |
| 17077540 |           |                                                                     | -0.2192 | 0.031  |
| 17077826 | MYBL1     | v-myb myeloblastosis viral oncogene homolog (avian)-like 1          | -0.7861 | 0.0073 |
| 17077848 | VCPIP1    | valosin containing protein (p97)/p47 complex interacting protein 1  | -0.3158 | 0.0234 |



|          |              |                                                                                  |         |        |
|----------|--------------|----------------------------------------------------------------------------------|---------|--------|
| 17078254 | SBSPON       | somatomedin B and thrombospondin, type 1 domain containing                       | -0.6953 | 0.0306 |
| 17078296 | STAU2        | staufen, RNA binding protein, homolog 2 (Drosophila)                             | -0.1886 | 0.0401 |
| 17078330 | UBE2W        | ubiquitin-conjugating enzyme E2W (putative)                                      | -0.2822 | 0.0117 |
| 17078534 |              |                                                                                  | -0.4986 | 0.0322 |
| 17078692 |              |                                                                                  | -0.7087 | 0.0456 |
| 17078756 | REXO1L2P     | REX1, RNA exonuclease 1 homolog (S. cerevisiae)-like 2 (pseudogene)              | -0.132  | 0.0386 |
| 17078758 | REXO1L2P     | REX1, RNA exonuclease 1 homolog (S. cerevisiae)-like 2 (pseudogene)              | -0.1512 | 0.0197 |
| 17078760 | REXO1L2P     | REX1, RNA exonuclease 1 homolog (S. cerevisiae)-like 2 (pseudogene)              | -0.1512 | 0.0197 |
| 17078762 | REXO1L2P     | REX1, RNA exonuclease 1 homolog (S. cerevisiae)-like 2 (pseudogene)              | -0.1512 | 0.0197 |
| 17078764 | REXO1L2P     | REX1, RNA exonuclease 1 homolog (S. cerevisiae)-like 2 (pseudogene)              | -0.1512 | 0.0197 |
| 17078969 |              |                                                                                  | -0.3026 | 0.0143 |
| 17079163 | FP6628       | uncharacterized LOC100132183                                                     | -0.3858 | 0.0485 |
| 17079293 | CCNE2        | cyclin E2                                                                        | -0.5926 | 0.0031 |
| 17079348 | LOC100500773 | serine/arginine-rich splicing factor 3 pseudogene                                | -0.1662 | 0.0436 |
| 17079416 | RPL30        | ribosomal protein L30                                                            | -0.2705 | 0.0178 |
| 17079420 |              |                                                                                  | -0.1998 | 0.0318 |
| 17079425 |              |                                                                                  | -0.4845 | 0.0444 |
| 17079427 |              |                                                                                  | -0.7499 | 0.0107 |
| 17079428 |              |                                                                                  | -0.1885 | 0.0334 |
| 17079429 |              |                                                                                  | -0.8097 | 0.0047 |
| 17079431 |              |                                                                                  | -0.7217 | 0.0434 |
| 17079527 |              |                                                                                  | -0.2154 | 0.0321 |
| 17079672 | PABPC1       | poly(A) binding protein, cytoplasmic 1                                           | -0.293  | 0.0216 |
| 17079830 | UBR5         | ubiquitin protein ligase E3 component n-recogin 5                                | -0.3997 | 0.0049 |
| 17080160 |              |                                                                                  | -0.1056 | 0.0466 |
| 17080447 |              |                                                                                  | -0.1434 | 0.0272 |
| 17080450 | EXT1         | exostosin 1                                                                      | -0.4602 | 0.0103 |
| 17080559 | TAF2         | TAF2 RNA polymerase II, TATA box binding protein (TBP)-associated factor, 150kDa | -0.3116 | 0.0339 |
| 17080686 |              |                                                                                  | -0.6103 | 0.011  |
| 17080749 | ATAD2        | ATPase family, AAA domain containing 2                                           | -0.7918 | 0.0073 |
| 17081067 | TMEM75       | transmembrane protein 75                                                         | -0.2903 | 0.004  |
| 17081071 |              |                                                                                  | -0.4635 | 0.0029 |
| 17081162 | ASAP1        | ArfGAP with SH3 domain, ankyrin repeat and PH domain 1                           | -0.589  | 0.0051 |
| 17081447 | ST3GAL1      | ST3 beta-galactoside alpha-2,3-sialyltransferase 1                               | -0.4604 | 0.0326 |
| 17081706 | LOC286109    | uncharacterized LOC286109                                                        | -0.9767 | 0.0002 |
| 17081708 | EIF2C2       | eukaryotic translation initiation factor 2C, 2                                   | -0.587  | 0.001  |
| 17082132 | NAPRT1       | nicotinate phosphoribosyltransferase domain containing 1                         | -0.2885 | 0.0468 |
| 17082250 | FAM83H       | family with sequence similarity 83, member H                                     | -0.4565 | 0.0047 |
| 17082263 | SCRIB        | scribbled homolog (Drosophila)                                                   | -0.1626 | 0.0228 |
| 17082453 | OPLAH        | 5-oxoprolinase (ATP-hydrolysing)                                                 | -0.1917 | 0.0111 |
| 17082976 | PGM5-AS1     | PGM5 antisense RNA 1 (non-protein coding)                                        | -0.3626 | 0.0432 |
| 17082982 | DOCK8        | dedicator of cytokinesis 8                                                       | -0.7996 | 0.0007 |
| 17083221 | KCNV2        | potassium channel, subfamily V, member 2                                         | -0.2743 | 0.0013 |
| 17083229 |              |                                                                                  | -0.5267 | 0.0011 |
| 17083282 | CDC37L1      | cell division cycle 37 homolog (S. cerevisiae)-like 1                            | -0.3302 | 0.0316 |
| 17083319 | JAK2         | Janus kinase 2                                                                   | -0.3326 | 0.025  |
| 17083381 | KIAA1432     | KIAA1432                                                                         | -0.3012 | 0.0213 |
| 17083492 | KDM4C        | lysine (K)-specific demethylase 4C                                               | -0.3042 | 0.0346 |
| 17083647 | SNAPC3       | small nuclear RNA activating complex, polypeptide 3, 50kDa                       | -0.401  | 0.0122 |
| 17083742 | CNTLN        | centlein, centrosomal protein                                                    | -0.5447 | 0.0108 |
| 17083853 |              |                                                                                  | -0.1888 | 0.035  |
| 17083988 |              |                                                                                  | -0.1719 | 0.0352 |

|          |           |                                                                                              |         |        |
|----------|-----------|----------------------------------------------------------------------------------------------|---------|--------|
| 17084069 |           |                                                                                              | -1.4268 | 0.0303 |
| 17084280 | NFX1      | nuclear transcription factor, X-box binding 1                                                | -0.409  | 0.0095 |
| 17084415 | SNORD121B | small nucleolar RNA, C/D box 121B                                                            | -0.4861 | 0.0191 |
| 17084669 | RUSC2     | RUN and SH3 domain containing 2                                                              | -0.5263 | 0.0039 |
| 17084685 | TESK1     | testis-specific kinase 1                                                                     | -0.7665 | 0      |
| 17084707 |           |                                                                                              | -0.1653 | 0.0205 |
| 17084710 | CCDC107   | coiled-coil domain containing 107                                                            | -0.4184 | 0.0099 |
| 17084736 | CREB3     | cAMP responsive element binding protein 3                                                    | -0.441  | 0.0096 |
| 17084904 | MELK      | maternal embryonic leucine zipper kinase                                                     | -1.0041 | 0.0049 |
| 17084966 | GRHPR     | glyoxylate reductase/hydroxypyruvate reductase                                               | -0.3153 | 0.0117 |
| 17084990 | POLR1E    | polymerase (RNA) I polypeptide E, 53kDa                                                      | -0.5299 | 0.0284 |
| 17085040 | TRMT10B   | tRNA methyltransferase 10 homolog B ( <i>S. cerevisiae</i> )                                 | -0.3242 | 0.0159 |
| 17085082 | ALDH1B1   | aldehyde dehydrogenase 1 family, member B1                                                   | -0.5538 | 0.01   |
| 17085139 |           |                                                                                              | -0.3913 | 0.0044 |
| 17085142 |           |                                                                                              | -0.4516 | 0.0239 |
| 17085236 | CBWD5     | COBW domain containing 5                                                                     | -0.5611 | 0.0002 |
| 17085267 | FOXD4L2   | forkhead box D4-like 2                                                                       | -0.1722 | 0.0496 |
| 17085271 | LOC728034 | BMS1 homolog, ribosome assembly protein (yeast) pseudogene                                   | -0.2931 | 0.0073 |
| 17085516 | PGM5-AS1  | PGM5 antisense RNA 1 (non-protein coding)                                                    | -1.1323 | 0.0237 |
| 17085520 |           |                                                                                              | -0.4723 | 0.0276 |
| 17085561 | CBWD7     | COBW domain containing 7                                                                     | -0.4496 | 0.0001 |
| 17085760 | MAMDC2    | MAM domain containing 2                                                                      | -0.9354 | 0.0172 |
| 17085779 | SMC5      | structural maintenance of chromosomes 5                                                      | -0.3941 | 0.0477 |
| 17085817 | C9orf85   | chromosome 9 open reading frame 85                                                           | -0.3498 | 0.0042 |
| 17085951 | RORB      | RAR-related orphan receptor B                                                                | -1.3245 | 0.0245 |
| 17085998 | PCSK5     | proprotein convertase subtilisin/kexin type 5                                                | -0.7271 | 0.0089 |
| 17086044 |           |                                                                                              | -0.6314 | 0.0268 |
| 17086208 | TLE4      | transducin-like enhancer of split 4 (E(sp1) homolog, <i>Drosophila</i> )                     | -0.6214 | 0.0026 |
| 17086350 |           |                                                                                              | -0.4759 | 0.0162 |
| 17086353 | RMI1      | RMI1, RecQ mediated genome instability 1, homolog ( <i>S. cerevisiae</i> )                   | -0.4007 | 0.0059 |
| 17086359 |           |                                                                                              | -0.6559 | 0.0184 |
| 17086432 | NAA35     | N(alpha)-acetyltransferase 35, NatC auxiliary subunit                                        | -0.5663 | 0.0008 |
| 17086634 | CKS2      | CDC28 protein kinase regulatory subunit 2                                                    | -0.9876 | 0.0002 |
| 17086780 |           |                                                                                              | -0.2113 | 0.0467 |
| 17086784 | CENPP     | centromere protein P                                                                         | -0.6727 | 0.0007 |
| 17086921 | FAM120A   | family with sequence similarity 120A                                                         | -0.2604 | 0.0027 |
| 17086947 | FAM120A   | family with sequence similarity 120A                                                         | -0.3094 | 0.0205 |
| 17086950 | PHF2      | PHD finger protein 2                                                                         | -0.3275 | 0.0004 |
| 17087032 |           |                                                                                              | -0.6221 | 0.0153 |
| 17087034 | HIATL1    | hippocampus abundant transcript-like 1                                                       | -0.5089 | 0.0013 |
| 17087138 | ERCC6L2   | excision repair cross-complementing rodent repair deficiency, complementation group 6-like 2 | -0.3333 | 0.0055 |
| 17087343 | NCBP1     | nuclear cap binding protein subunit 1, 80kDa                                                 | -0.555  | 0.0002 |
| 17087378 |           |                                                                                              | -0.2423 | 0.0461 |
| 17087380 | ANP32B    | acidic (leucine-rich) nuclear phosphoprotein 32 family, member B                             | -0.266  | 0.0264 |
| 17087426 |           |                                                                                              | -0.2112 | 0.0316 |
| 17087430 | COL15A1   | collagen, type XV, alpha 1                                                                   | -1.407  | 0.0021 |
| 17087498 | SEC61B    | Sec61 beta subunit                                                                           | -0.3505 | 0.0011 |
| 17087517 | NR4A3     | nuclear receptor subfamily 4, group A, member 3                                              | -1.3127 | 0.0023 |
| 17087535 | STX17     | syntaxin 17                                                                                  | -0.3795 | 0.0045 |
| 17087555 | INVS      | inversin                                                                                     | -0.4295 | 0.0012 |
| 17087633 | ZNF189    | zinc finger protein 189                                                                      | -0.4584 | 0.0397 |
| 17087861 | TMEM38B   | transmembrane protein 38B                                                                    | -0.4188 | 0.0492 |
| 17087900 | ZNF462    | zinc finger protein 462                                                                      | -0.6144 | 0.0017 |
| 17087933 | RAD23B    | RAD23 homolog B ( <i>S. cerevisiae</i> )                                                     | -0.3737 | 0.0006 |
| 17087954 |           |                                                                                              | -0.1845 | 0.0378 |
| 17088084 | DNAJC25   | DnaJ (Hsp40) homolog, subfamily C, member 25                                                 | -0.4126 | 0.0027 |

|          |              |                                                          |         |        |
|----------|--------------|----------------------------------------------------------|---------|--------|
| 17088098 |              |                                                          | -0.3669 | 0.0453 |
| 17088100 | UGCG         | UDP-glucose ceramide glucosyltransferase                 | -1.1828 | 0.0033 |
| 17088116 | MIR4668      | microRNA 4668                                            | -0.5358 | 0.0423 |
| 17088124 | HSDL2        | hydroxysteroid dehydrogenase like 2                      | -0.5537 | 0.0033 |
| 17088173 | SLC31A1      | solute carrier family 31 (copper transporters), member 1 | -0.8774 | 0      |
| 17088185 | PRPF4        | PRP4 pre-mRNA processing factor 4 homolog (yeast)        | -0.523  | 0.0003 |
| 17088203 |              |                                                          | -0.3907 | 0.0493 |
| 17088213 | C9orf43      | chromosome 9 open reading frame 43                       | -0.3607 | 0.004  |
| 17088401 | ATP6V1G1     | ATPase, H+ transporting, lysosomal 13kDa, V1 subunit G1  | -0.22   | 0.0451 |
| 17088408 | C9orf91      | chromosome 9 open reading frame 91                       | -0.3193 | 0.0172 |
| 17088423 |              |                                                          | -0.2303 | 0.0392 |
| 17088579 | LOC253039    | uncharacterized LOC253039                                | -0.6183 | 0.0127 |
| 17088589 | CNTRL        | centriolin                                               | -0.2935 | 0.0478 |
| 17088741 | MRRF         | mitochondrial ribosome recycling factor                  | -0.7019 | 0      |
| 17088787 |              |                                                          | -0.3312 | 0.0135 |
| 17088790 | OR1J2        | olfactory receptor, family 1, subfamily J, member 2      | -0.2259 | 0.0297 |
| 17088838 | RABGAP1      | RAB GTPase activating protein 1                          | -0.3192 | 0.0186 |
| 17088929 | NEK6         | NIMA (never in mitosis gene a)-related kinase 6          | -0.4385 | 0.0136 |
| 17088991 | MIR181A2HG   | MIR181A2 host gene (non-protein coding)                  | -0.433  | 0.0204 |
| 17089056 | GAPVD1       | GTPase activating protein and VPS9 domains 1             | -0.3156 | 0.0247 |
| 17089188 | ZBTB43       | zinc finger and BTB domain containing 43                 | -0.3528 | 0.0008 |
| 17089194 | ZBTB34       | zinc finger and BTB domain containing 34                 | -0.4425 | 0.0091 |
| 17089460 | FPGS         | folypolyglutamate synthase                               | -0.1917 | 0.0326 |
| 17089542 | C9orf16      | chromosome 9 open reading frame 16                       | -0.8094 | 0.0005 |
| 17089638 | MIR2964A     | microRNA 2964a                                           | -0.1275 | 0.0403 |
| 17089735 | SPTAN1       | spectrin, alpha, non-erythrocytic 1                      | -0.3668 | 0.0289 |
| 17089849 | TBC1D13      | TBC1 domain family, member 13                            | -0.4147 | 0.0063 |
| 17089898 | NUP188       | nucleoporin 188kDa                                       | -0.4267 | 0.0178 |
| 17089982 | DOLPP1       | dolichyl pyrophosphate phosphatase 1                     | -0.4134 | 0.0121 |
| 17089996 |              |                                                          | -0.2934 | 0.0352 |
| 17089999 | PPP2R4       | protein phosphatase 2A activator, regulatory subunit 4   | -0.2133 | 0.0459 |
| 17090063 | LOC100128077 | uncharacterized LOC100128077                             | -0.348  | 0.0256 |
| 17090085 | NTMT1        | N-terminal Xaa-Pro-Lys N-methyltransferase 1             | -0.3478 | 0.0356 |
| 17090100 |              |                                                          | -0.3013 | 0.0011 |
| 17090357 | EXOSC2       | exosome component 2                                      | -0.2982 | 0.009  |
| 17090373 | ABL1         | c-abl oncogene 1, non-receptor tyrosine kinase           | -0.41   | 0.0042 |
| 17090394 | LAMC3        | laminin, gamma 3                                         | -0.9262 | 0.0045 |
| 17090427 | AIF1L        | allograft inflammatory factor 1-like                     | -0.4508 | 0.0172 |
| 17090444 | NUP214       | nucleoporin 214kDa                                       | -0.2817 | 0.0187 |
| 17090526 | PRRC2B       | proline-rich coiled-coil 2B                              | -0.3903 | 0.0008 |
| 17090564 | SNORD62A     | small nucleolar RNA, C/D box 62A                         | -0.508  | 0.005  |
| 17090566 | SNORD62A     | small nucleolar RNA, C/D box 62A                         | -0.508  | 0.005  |
| 17090568 | POMT1        | protein-O-mannosyltransferase 1                          | -0.2039 | 0.0361 |
| 17090608 |              |                                                          | -0.4541 | 0.0016 |
| 17090646 | GTF3C4       | general transcription factor IIIC, polypeptide 4, 90kDa  | -0.4622 | 0.0043 |
| 17090688 | GTF3C5       | general transcription factor IIIC, polypeptide 5, 63kDa  | -0.4028 | 0.0019 |
| 17090893 | WDR5         | WD repeat domain 5                                       | -0.3538 | 0.0087 |
| 17091087 |              |                                                          | -0.216  | 0.0394 |
| 17091128 | PAEP         | progesterone-associated endometrial protein              | -0.1851 | 0.0354 |
| 17091203 |              |                                                          | -0.4879 | 0.0112 |
| 17091239 | PMPCA        | peptidase (mitochondrial processing) alpha               | -0.2654 | 0.0332 |
| 17091392 |              |                                                          | -0.2302 | 0.0297 |
| 17091397 | PHPT1        | phosphohistidine phosphatase 1                           | -0.2196 | 0.0365 |
| 17091527 | C9orf142     | chromosome 9 open reading frame 142                      | -0.2156 | 0.0124 |
| 17091571 | MAN1B1       | mannosidase, alpha, class 1B, member 1                   | -0.3112 | 0.0015 |
| 17091695 | TUBB4B       | tubulin, beta 4B class IVb                               | -0.2746 | 0.0293 |
| 17091710 | COBRA1       | cofactor of BRCA1                                        | -0.3187 | 0.0292 |
| 17091731 |              |                                                          | -0.3213 | 0.005  |
| 17091746 | MRPL41       | mitochondrial ribosomal protein L41                      | -0.4857 | 0.0004 |
| 17091769 | EHMT1        | euchromatic histone-lysine N-methyltransferase 1         | -0.4075 | 0.0027 |

|          |           |                                                                                                |         |        |
|----------|-----------|------------------------------------------------------------------------------------------------|---------|--------|
| 17091815 | FLJ40292  | uncharacterized LOC643210                                                                      | -0.4048 | 0.0004 |
| 17091928 | FOXD4     | forkhead box D4                                                                                | -0.3314 | 0.0204 |
| 17091932 | CBWD1     | COBW domain containing 1                                                                       | -0.3218 | 0.0323 |
| 17091973 | C9orf66   | chromosome 9 open reading frame 66                                                             | -0.6443 | 0.0001 |
| 17091977 |           |                                                                                                | -0.318  | 0.015  |
| 17092020 | KIAA0020  | KIAA0020                                                                                       | -0.6782 | 0.0006 |
| 17092153 | AK3       | adenylate kinase 3                                                                             | -0.3346 | 0.0316 |
| 17092205 |           |                                                                                                | -0.271  | 0.0479 |
| 17092261 |           |                                                                                                | -0.2066 | 0.0448 |
| 17092264 | C9orf38   | chromosome 9 open reading frame 38                                                             | -0.376  | 0.0091 |
| 17092710 | SCARNA8   | small Cajal body-specific RNA 8                                                                | -0.4173 | 0.0448 |
| 17092734 |           |                                                                                                | -0.3858 | 0.0104 |
| 17092736 |           |                                                                                                | -0.3858 | 0.0104 |
| 17092737 | RPS6      | ribosomal protein S6                                                                           | -0.2212 | 0.0155 |
| 17092742 |           |                                                                                                | -0.1371 | 0.0172 |
| 17092743 |           |                                                                                                | -0.1602 | 0.035  |
| 17092745 |           |                                                                                                | -0.5695 | 0.0183 |
| 17092748 |           |                                                                                                | -0.7263 | 0.0062 |
| 17092749 |           |                                                                                                | -0.5226 | 0.0139 |
| 17092767 | MLLT3     | myeloid/lymphoid or mixed-lineage leukemia (trithorax homolog, Drosophila); translocated to, 3 | -0.4998 | 0.01   |
| 17092786 | MIR4473   | microRNA 4473                                                                                  | -0.156  | 0.0487 |
| 17092788 | MIR4474   | microRNA 4474                                                                                  | -0.3336 | 0.0024 |
| 17093042 | C9orf72   | chromosome 9 open reading frame 72                                                             | -0.6544 | 0.0072 |
| 17093325 | UBAP2     | ubiquitin associated protein 2                                                                 | -0.4277 | 0.0345 |
| 17093595 | FANCG     | Fanconi anemia, complementation group G                                                        | -0.2706 | 0.015  |
| 17093681 | FAM166B   | family with sequence similarity 166, member B                                                  | -1.8576 | 0      |
| 17093990 | MIR4540   | microRNA 4540                                                                                  | -0.3044 | 0.0451 |
| 17094005 | ZBTB5     | zinc finger and BTB domain containing 5                                                        | -0.5099 | 0.0004 |
| 17094009 | FBXO10    | F-box protein 10                                                                               | -0.5768 | 0.0103 |
| 17094028 | TOMM5     | translocase of outer mitochondrial membrane 5 homolog (yeast)                                  | -0.4923 | 0.004  |
| 17094088 | ANKRD18A  | ankyrin repeat domain 18A                                                                      | -0.238  | 0.0309 |
| 17094237 |           |                                                                                                | -0.3249 | 0.043  |
| 17094389 | CNTNAP3   | contactin associated protein-like 3                                                            | -0.5894 | 0.0178 |
| 17094459 | AQP7P1    | aquaporin 7 pseudogene 1                                                                       | -0.2472 | 0.0127 |
| 17094498 |           |                                                                                                | -0.7658 | 0.0258 |
| 17094534 | CBWD6     | COBW domain containing 6                                                                       | -0.3786 | 0.0007 |
| 17094582 | LOC728034 | BMS1 homolog, ribosome assembly protein (yeast) pseudogene                                     | -0.2931 | 0.0073 |
| 17094594 | LOC728034 | BMS1 homolog, ribosome assembly protein (yeast) pseudogene                                     | -0.2931 | 0.0073 |
| 17094605 | LOC728034 | BMS1 homolog, ribosome assembly protein (yeast) pseudogene                                     | -0.2931 | 0.0073 |
| 17094609 | FOXD4L2   | forkhead box D4-like 2                                                                         | -0.1722 | 0.0496 |
| 17094613 | CBWD7     | COBW domain containing 7                                                                       | -0.4874 | 0.0002 |
| 17094662 |           |                                                                                                | -0.4307 | 0.0084 |
| 17094667 | PGM5-AS1  | PGM5 antisense RNA 1 (non-protein coding)                                                      | -1.4779 | 0.0302 |
| 17094671 | PGM5-AS1  | PGM5 antisense RNA 1 (non-protein coding)                                                      | -0.9128 | 0.0337 |
| 17094718 | PTAR1     | protein prenyltransferase alpha subunit repeat containing 1                                    | -0.3845 | 0.0009 |
| 17094855 | FAM108B1  | family with sequence similarity 108, member B1                                                 | -0.2891 | 0.0138 |
| 17094876 | ZFAND5    | zinc finger, AN1-type domain 5                                                                 | -0.4623 | 0.0045 |
| 17095017 |           |                                                                                                | -0.2723 | 0.0013 |
| 17095150 | TLE1      | transducin-like enhancer of split 1 (E(sp1) homolog, Drosophila)                               | -0.9289 | 0.0003 |
| 17095336 |           |                                                                                                | -0.7796 | 0.0312 |
| 17095342 |           |                                                                                                | -0.1661 | 0.0483 |
| 17095703 | NFIL3     | nuclear factor, interleukin 3 regulated                                                        | -0.8574 | 0.0038 |
| 17095775 | IARS      | isoleucyl-tRNA synthetase                                                                      | -0.4988 | 0.0011 |
| 17095828 | SNORA84   | small nucleolar RNA, H/ACA box 84                                                              | -0.5278 | 0.0136 |
| 17095830 | NOL8      | nucleolar protein 8                                                                            | -0.284  | 0.049  |

|          |           |                                                                                                  |         |        |
|----------|-----------|--------------------------------------------------------------------------------------------------|---------|--------|
| 17095870 | OGN       | osteoglycin                                                                                      | -0.5157 | 0.0323 |
| 17095887 | ASPN      | asporin                                                                                          | -0.5842 | 0.0241 |
| 17095918 | IPPK      | inositol 1,3,4,5,6-pentakisphosphate 2-kinase                                                    | -0.3417 | 0.0176 |
| 17095981 | FAM120AOS | family with sequence similarity 120A opposite strand                                             | -0.2134 | 0.0124 |
| 17096205 | ZNF367    | zinc finger protein 367                                                                          | -0.4741 | 0.0167 |
| 17096242 | AAED1     | AhpC/TSA antioxidant enzyme domain containing 1                                                  | -0.3816 | 0.0405 |
| 17096274 |           |                                                                                                  | -0.5066 | 0.0046 |
| 17096326 |           |                                                                                                  | -0.2215 | 0.0257 |
| 17096335 | ANKRD18CP | ankyrin repeat domain 18C, pseudogene                                                            | -0.1948 | 0.0484 |
| 17096354 | TSTD2     | thiosulfate sulfurtransferase (rhodanese)-like domain containing 2                               | -0.2629 | 0.0039 |
| 17096379 |           |                                                                                                  | -0.5328 | 0.0046 |
| 17096394 |           |                                                                                                  | -0.2119 | 0.0311 |
| 17096433 |           |                                                                                                  | -0.4754 | 0.012  |
| 17096516 | ANKS6     | ankyrin repeat and sterile alpha motif domain containing 6                                       | -0.177  | 0.0425 |
| 17096555 |           |                                                                                                  | -0.5986 | 0.0018 |
| 17096561 |           |                                                                                                  | -0.3216 | 0.0378 |
| 17096580 | ERP44     | endoplasmic reticulum protein 44                                                                 | -0.2431 | 0.0305 |
| 17096595 | TEX10     | testis expressed 10                                                                              | -0.4046 | 0.0158 |
| 17096631 | MRPL50    | mitochondrial ribosomal protein L50                                                              | -0.3863 | 0.0048 |
| 17096827 | KLF4      | Kruppel-like factor 4 (gut)                                                                      | -0.3215 | 0.0234 |
| 17096859 | IKBKAP    | inhibitor of kappa light polypeptide gene enhancer in B-cells, kinase complex-associated protein | -0.3796 | 0.0047 |
| 17096904 | CTNNAL1   | catenin (cadherin-associated protein), alpha-like 1                                              | -0.5177 | 0.0168 |
| 17096929 | RN5-8S3   | RNA, 5.8S ribosomal 3                                                                            | -0.6594 | 0.0345 |
| 17096998 |           |                                                                                                  | -0.2895 | 0.0205 |
| 17097152 | KIAA0368  | KIAA0368                                                                                         | -0.4202 | 0.0017 |
| 17097240 | C9orf84   | chromosome 9 open reading frame 84                                                               | -1.3799 | 0.0052 |
| 17097277 |           |                                                                                                  | -0.6587 | 0.0352 |
| 17097308 | PTBP3     | polypyrimidine tract binding protein 3                                                           | -0.3791 | 0.0462 |
| 17097340 | INIP      | INTS3 and NABP interacting protein                                                               | -0.278  | 0.0153 |
| 17097388 | FKBP15    | FK506 binding protein 15, 133kDa                                                                 | -0.241  | 0.024  |
| 17097423 | CDC26     | cell division cycle 26 homolog (S. cerevisiae)                                                   | -0.2715 | 0.0382 |
| 17097495 | POLE3     | polymerase (DNA directed), epsilon 3, accessory subunit                                          | -0.329  | 0.0007 |
| 17097603 | DFNB31    | deafness, autosomal recessive 31                                                                 | -0.4853 | 0.0126 |
| 17097811 | MIR147A   | microRNA 147a                                                                                    | -0.2959 | 0.0432 |
| 17097813 | CDK5RAP2  | CDK5 regulatory subunit associated protein 2                                                     | -0.4191 | 0.0105 |
| 17097880 | FBXW2     | F-box and WD repeat domain containing 2                                                          | -0.3879 | 0.0025 |
| 17097895 | PSMD5     | proteasome (prosome, macropain) 26S subunit, non-ATPase, 5                                       | -0.3759 | 0.0019 |
| 17097914 | PHF19     | PHD finger protein 19                                                                            | -0.3823 | 0.0192 |
| 17097941 | TRAF1     | TNF receptor-associated factor 1                                                                 | -0.1938 | 0.0409 |
| 17098048 | TTLL11    | tubulin tyrosine ligase-like family, member 11                                                   | -0.3701 | 0.0055 |
| 17098173 | ZBTB6     | zinc finger and BTB domain containing 6                                                          | -0.3578 | 0.0026 |
| 17098222 | DENND1A   | DENN/MADD domain containing 1A                                                                   | -0.3035 | 0.019  |
| 17098275 | LOC613206 | myeloproliferative disease associated tumor antigen 5                                            | -0.3298 | 0.0254 |
| 17098278 | PSMB7     | proteasome (prosome, macropain) subunit, beta type, 7                                            | -0.3589 | 0.0102 |
| 17098293 | NR5A1     | nuclear receptor subfamily 5, group A, member 1                                                  | -1.0362 | 0      |
| 17098322 | RPL35     | ribosomal protein L35                                                                            | -0.1506 | 0.0165 |
| 17098324 |           |                                                                                                  | -0.1987 | 0.0144 |
| 17098328 |           |                                                                                                  | -0.3427 | 0.0489 |
| 17098329 |           |                                                                                                  | -0.2468 | 0.0307 |
| 17098331 |           |                                                                                                  | -0.2575 | 0.017  |
| 17098332 | GOLGA1    | golgin A1                                                                                        | -0.3898 | 0.0011 |
| 17098395 | PPP6C     | protein phosphatase 6, catalytic subunit                                                         | -0.1999 | 0.0398 |
| 17098745 | PTGES2    | prostaglandin E synthase 2                                                                       | -0.2835 | 0.0045 |
| 17098766 | CIZ1      | CDKN1A interacting zinc finger protein 1                                                         | -0.2787 | 0.0232 |
| 17098866 | MIR219-2  | microRNA 219-2                                                                                   | -0.2135 | 0.0107 |
| 17098932 | C9orf114  | chromosome 9 open reading frame 114                                                              | -0.2262 | 0.0276 |

|          |              |                                                              |         |        |
|----------|--------------|--------------------------------------------------------------|---------|--------|
| 17099001 | CRAT         | carnitine O-acetyltransferase                                | -0.3058 | 0.0196 |
| 17099062 | ASB6         | ankyrin repeat and SOCS box containing 6                     | -0.6686 | 0.0002 |
| 17099073 | LOC100506231 | uncharacterized LOC100506231                                 | -0.1723 | 0.0453 |
| 17099083 | TOR1A        | torsin family 1, member A (torsin A)                         | -0.3484 | 0.0028 |
| 17099146 | LOC100272217 | uncharacterized LOC100272217                                 | -0.2118 | 0.0397 |
| 17099165 |              |                                                              | -0.5036 | 0.0076 |
| 17099167 |              |                                                              | -0.259  | 0.0155 |
| 17099208 | RAPGEF1      | Rap guanine nucleotide exchange factor (GEF) 1               | -0.693  | 0.0002 |
| 17099309 | DDX31        | DEAD (Asp-Glu-Ala-Asp) box polypeptide 31                    | -0.2507 | 0.0297 |
| 17099473 | SURF6        | surfeit 6                                                    | -0.4297 | 0.0002 |
| 17099484 | MED22        | mediator complex subunit 22                                  | -0.1691 | 0.0465 |
| 17099531 | REXO4        | REX4, RNA exonuclease 4 homolog ( <i>S. cerevisiae</i> )     | -0.3025 | 0.0225 |
| 17099617 | VAV2         | vav 2 guanine nucleotide exchange factor                     | -0.7448 | 0.0018 |
| 17099651 | BRD3         | bromodomain containing 3                                     | -0.5551 | 0.0004 |
| 17099742 |              |                                                              | -0.3185 | 0.0098 |
| 17099847 | QSOX2        | quiescin Q6 sulfhydryl oxidase 2                             | -0.566  | 0.0044 |
| 17099923 | SNAPC4       | small nuclear RNA activating complex, polypeptide 4, 190kDa  | -0.264  | 0.032  |
| 17099947 | SDCCAG3      | serologically defined colon cancer antigen 3                 | -0.4183 | 0.0007 |
| 17099980 | SEC16A       | SEC16 homolog A ( <i>S. cerevisiae</i> )                     | -0.3509 | 0.015  |
| 17100173 | EDF1         | endothelial differentiation-related factor 1                 | -0.2901 | 0.0008 |
| 17100183 | FBXW5        | F-box and WD repeat domain containing 5                      | -0.4743 | 0.0129 |
| 17100328 | DPP7         | dipeptidyl-peptidase 7                                       | -0.2922 | 0.03   |
| 17100361 | ANAPC2       | anaphase promoting complex subunit 2                         | -0.2288 | 0.003  |
| 17100390 | TMEM203      | transmembrane protein 203                                    | -0.2308 | 0.0439 |
| 17100585 | ZMYND19      | zinc finger, MYND-type containing 19                         | -0.4082 | 0.0048 |
| 17100597 | C9orf37      | chromosome 9 open reading frame 37                           | -0.4613 | 0.0067 |
| 17100614 |              |                                                              | -0.4588 | 0.0313 |
| 17100731 |              |                                                              | -0.444  | 0.0034 |
| 17100775 |              |                                                              | -0.4827 | 0.0045 |
| 17100820 |              |                                                              | -0.2358 | 0.0034 |
| 17100824 |              |                                                              | -0.2358 | 0.0034 |
| 17100893 |              |                                                              | -0.4143 | 0.0306 |
| 17100897 |              |                                                              | -0.4827 | 0.0045 |
| 17100987 |              |                                                              | -0.4934 | 0.0405 |
| 17101016 |              |                                                              | -0.2422 | 0.0232 |
| 17101027 |              |                                                              | -0.4438 | 0.0072 |
| 17102352 | GK           | glycerol kinase                                              | -0.4208 | 0.0165 |
| 17102658 |              |                                                              | -0.804  | 0.005  |
| 17102664 |              |                                                              | -0.9165 | 0.0292 |
| 17103394 |              |                                                              | -0.5026 | 0.036  |
| 17103837 | MAGED4B      | melanoma antigen family D, 4B                                | -0.2137 | 0.0372 |
| 17104363 | EFNB1        | ephrin-B1                                                    | -0.5039 | 0.0274 |
| 17105163 | ZNF711       | zinc finger protein 711                                      | -1.4408 | 0.0072 |
| 17105269 | FAM133A      | family with sequence similarity 133, member A                | -0.6368 | 0.0437 |
| 17105401 | CENPI        | centromere protein I                                         | -0.5652 | 0.006  |
| 17105862 | NRK          | Nik related kinase                                           | -1.6263 | 0.0315 |
| 17107505 | CXorf1       | chromosome X open reading frame 1                            | -0.1249 | 0.038  |
| 17107816 | FATE1        | fetal and adult testis expressed 1                           | -2.4204 | 0.0007 |
| 17109356 | RNU5F-7P     | RNA, U5F small nuclear 7, pseudogene                         | -0.2625 | 0.0093 |
| 17109464 | SCML2        | sex comb on midleg-like 2 ( <i>Drosophila</i> )              | -0.5804 | 0.0062 |
| 17110435 |              |                                                              | -0.3289 | 0.0096 |
| 17111146 |              |                                                              | -0.2214 | 0.0343 |
| 17113864 |              |                                                              | -0.7203 | 0.0382 |
| 17113978 | RN5S513      | RNA, 5S ribosomal 513                                        | -0.4058 | 0.0229 |
| 17114075 | ZNF280C      | zinc finger protein 280C                                     | -0.4952 | 0.0172 |
| 17114520 | ARHGEF6      | Rac/Cdc42 guanine nucleotide exchange factor (GEF) 6         | -0.5517 | 0.0042 |
| 17115978 |              |                                                              | -0.2424 | 0.0247 |
| 17116189 |              |                                                              | -0.2398 | 0.0187 |
| 17116194 | TTY15        | testis-specific transcript, Y-linked 15 (non-protein coding) | -1.1982 | 0.0426 |

|          |              |                                                              |         |        |
|----------|--------------|--------------------------------------------------------------|---------|--------|
| 17116284 | TMSB4Y       | thymosin beta 4, Y-linked                                    | -0.4072 | 0.0251 |
| 17116745 | P2RY8        | purinergic receptor P2Y, G-protein coupled, 8                | -0.6228 | 0.0173 |
| 17116822 | TTY16        | testis-specific transcript, Y-linked 16 (non-protein coding) | -0.264  | 0.019  |
| 17116847 | FAM197Y5     | family with sequence similarity 197, Y-linked, member 5      | -0.1372 | 0.0032 |
| 17116894 | FAM197Y5     | family with sequence similarity 197, Y-linked, member 5      | -0.1382 | 0.0129 |
| 17117173 |              |                                                              | -0.3285 | 0.0376 |
| 17117460 | LOC100505955 | putative uncharacterized protein FLJ44672-like               | -0.2692 | 0.0043 |
| 17117531 | SKCG-1       | sporadic kidney cancer gene 1                                | -0.2029 | 0.0287 |
| 17117537 | LOC100131262 | uncharacterized LOC100131262                                 | -0.5384 | 0.0074 |
| 17117588 | LOC727803    | RAN binding protein 1 pseudogene                             | -0.3249 | 0.0185 |
| 17117626 | PPP2R5C      | protein phosphatase 2, regulatory subunit B', gamma          | -0.6125 | 0.0023 |
| 17117629 |              |                                                              | -0.3789 | 0.0019 |
| 17117631 | LOC100128075 | uncharacterized LOC100128075                                 | -0.2065 | 0.0125 |
| 17117657 | LOC643797    | AGVR6190                                                     | -0.1865 | 0.0126 |
| 17117697 | LOC729313    | peptidylprolyl isomerase A (cyclophilin A) pseudogene        | -0.2689 | 0.0393 |
| 17117736 |              |                                                              | -0.8095 | 0.0444 |
| 17117798 |              |                                                              | -0.3639 | 0.038  |
| 17117817 | LOC100652943 | putative uncharacterized protein FLJ38264-like               | -0.2624 | 0.0387 |
| 17117843 |              |                                                              | -0.4885 | 0.0132 |
| 17117851 | LOC729770    | uncharacterized LOC729770                                    | -0.2632 | 0.0201 |
| 17117857 | LOC100508950 | uncharacterized LOC100508950                                 | -0.5045 | 0.017  |
| 17117869 | LOC100506934 | uncharacterized LOC100506934                                 | -0.4448 | 0.0009 |
| 17117874 | LOC100507307 | uncharacterized LOC100507307                                 | -0.5196 | 0.0343 |
| 17117924 | LOC100509671 | uncharacterized LOC100509671                                 | -0.3112 | 0.0206 |
| 17117934 | MGC15705     | uncharacterized protein MGC15705                             | -0.3324 | 0.0038 |
| 17118152 | LOC100129033 | QIQN5815                                                     | -0.675  | 0.011  |
| 17118166 | ZNF451       | zinc finger protein 451                                      | -0.4095 | 0.0487 |
| 17118173 |              |                                                              | -0.2296 | 0.0499 |
| 17118187 |              |                                                              | -0.6138 | 0.0057 |
| 17118281 | LOC100506458 | putative uncharacterized protein LOC65996-like               | -0.272  | 0.0295 |
| 17118303 |              |                                                              | -1.2224 | 0.0044 |
| 17118401 | LOC100132249 | uncharacterized LOC100132249                                 | -0.2614 | 0.0263 |
| 17118417 | FP2234       | uncharacterized LOC100507137                                 | -0.2242 | 0.0488 |
| 17118426 | LOC100652907 | uncharacterized LOC100652907                                 | -0.4595 | 0.001  |
| 17118430 |              |                                                              | -1.0417 | 0.0157 |
| 17118478 | TEKT4P2      | tektin 4 pseudogene 2                                        | -0.4675 | 0.0231 |
| 17118652 |              |                                                              | -0.5411 | 0.0476 |
| 17118654 |              |                                                              | -0.6016 | 0.0177 |
| 17118722 |              |                                                              | -0.7477 | 0.0081 |
| 17118820 |              |                                                              | -0.4043 | 0.0346 |
| 17118822 |              |                                                              | -0.252  | 0.0392 |
| 17118830 |              |                                                              | -0.5371 | 0.0049 |
| 17118854 |              |                                                              | -0.5534 | 0.0277 |
| 17118856 |              |                                                              | -0.4421 | 0.0057 |
| 17118930 |              |                                                              | -2.9779 | 0      |
| 17118988 |              |                                                              | -0.4452 | 0.0076 |
| 17119010 |              |                                                              | -0.3068 | 0.0289 |
| 17119058 |              |                                                              | -0.5268 | 0.0439 |
| 17119068 |              |                                                              | -0.5677 | 0.0065 |
| 17119096 |              |                                                              | -0.2794 | 0.0197 |
| 17119286 |              |                                                              | -0.3825 | 0.0182 |
| 17119332 |              |                                                              | -0.293  | 0.0207 |
| 17119408 |              |                                                              | -0.2893 | 0.0399 |
| 17119726 |              |                                                              | -0.4574 | 0.0045 |
| 17119730 |              |                                                              | -0.5726 | 0.0266 |
| 17119744 |              |                                                              | -0.5415 | 0.0088 |
| 17119802 |              |                                                              | -0.2917 | 0.0219 |
| 17120202 |              |                                                              | -0.4252 | 0.0102 |
| 17120506 |              |                                                              | -0.7448 | 0.0003 |
| 17120538 |              |                                                              | -0.4326 | 0.0041 |

|          |  |  |         |        |
|----------|--|--|---------|--------|
| 17120604 |  |  | -0.2165 | 0.0073 |
| 17120606 |  |  | -0.1873 | 0.0127 |
| 17120626 |  |  | -0.3049 | 0.0486 |
| 17120634 |  |  | -0.2975 | 0.011  |
| 17120658 |  |  | -0.1006 | 0.044  |
| 17120686 |  |  | -0.4014 | 0.0113 |
| 17120722 |  |  | -0.1944 | 0.0339 |
| 17120806 |  |  | -0.4687 | 0.0036 |
| 17120936 |  |  | -1.1078 | 0.0415 |
| 17121084 |  |  | -0.1537 | 0.0284 |
| 17121132 |  |  | -0.7785 | 0.0007 |
| 17121144 |  |  | -0.2191 | 0.0234 |
| 17121146 |  |  | -0.3038 | 0.0441 |
| 17121150 |  |  | -0.3808 | 0.0263 |
| 17121166 |  |  | -0.198  | 0.0453 |
| 17121274 |  |  | -0.4843 | 0.0403 |
| 17121296 |  |  | -0.5914 | 0.0417 |
| 17121322 |  |  | -0.6371 | 0.0008 |
| 17121342 |  |  | -0.4384 | 0.0012 |
| 17121346 |  |  | -0.2855 | 0.0449 |
| 17121364 |  |  | -0.3313 | 0.0147 |
| 17121372 |  |  | -0.3505 | 0.0286 |
| 17121374 |  |  | -0.2553 | 0.0189 |
| 17121376 |  |  | -0.2769 | 0.0228 |
| 17121410 |  |  | -0.4365 | 0.0038 |
| 17121434 |  |  | -0.2153 | 0.0438 |
| 17121444 |  |  | -0.2664 | 0.0265 |
| 17121446 |  |  | -0.2154 | 0.0153 |
| 17121466 |  |  | -0.3194 | 0.0461 |
| 17121468 |  |  | -0.1856 | 0.0042 |
| 17121480 |  |  | -0.2693 | 0.0404 |
| 17121486 |  |  | -0.3247 | 0.01   |
| 17121488 |  |  | -0.5222 | 0.0019 |
| 17121584 |  |  | -0.5353 | 0.0097 |
| 17121586 |  |  | -1.0357 | 0.0067 |
| 17121630 |  |  | -0.3217 | 0.0432 |
| 17121814 |  |  | -0.2998 | 0.0423 |
| 17121818 |  |  | -0.3531 | 0.0197 |
| 17121820 |  |  | -0.3644 | 0.0233 |
| 17121896 |  |  | -0.479  | 0.0264 |
| 17122038 |  |  | -0.1994 | 0.0191 |
| 17122052 |  |  | -0.2076 | 0.0214 |
| 17122162 |  |  | -0.1615 | 0.0243 |
| 17122246 |  |  | -0.6669 | 0.0007 |
| 17122252 |  |  | -0.2364 | 0.0375 |
| 17122268 |  |  | -0.2815 | 0.0037 |
| 17122286 |  |  | -0.3322 | 0.0239 |
| 17122446 |  |  | -0.2616 | 0.0068 |
| 17122462 |  |  | -0.3206 | 0.0479 |
| 17122468 |  |  | -0.6842 | 0.0163 |
| 17122470 |  |  | -0.5713 | 0.0324 |
| 17122472 |  |  | -0.5295 | 0.0371 |
| 17122474 |  |  | -0.737  | 0.006  |
| 17122476 |  |  | -0.3958 | 0.0079 |
| 17122478 |  |  | -0.4902 | 0.007  |
| 17122482 |  |  | -0.7685 | 0.0076 |
| 17122484 |  |  | -0.5731 | 0.0093 |
| 17122486 |  |  | -0.586  | 0.0111 |
| 17122488 |  |  | -0.8016 | 0.0069 |
| 17122490 |  |  | -0.6865 | 0.0064 |
| 17122492 |  |  | -0.5984 | 0.0083 |



|          |  |  |         |        |
|----------|--|--|---------|--------|
| 17122494 |  |  | -0.504  | 0.0175 |
| 17122496 |  |  | -0.7163 | 0.009  |
| 17122498 |  |  | -0.7227 | 0.0031 |
| 17122500 |  |  | -0.5356 | 0.0179 |
| 17122504 |  |  | -0.4491 | 0.032  |
| 17122524 |  |  | -0.3109 | 0.0277 |
| 17122640 |  |  | -0.5098 | 0.0174 |
| 17122642 |  |  | -0.383  | 0.0252 |
| 17122644 |  |  | -0.3532 | 0.0208 |
| 17122648 |  |  | -0.4089 | 0.0298 |
| 17122650 |  |  | -0.7301 | 0.0043 |
| 17122652 |  |  | -0.567  | 0.009  |
| 17122654 |  |  | -0.3231 | 0.0434 |
| 17122658 |  |  | -0.4521 | 0.0361 |
| 17122664 |  |  | -0.568  | 0.0136 |
| 17122748 |  |  | -0.1273 | 0.0424 |
| 17122886 |  |  | -0.5611 | 0.0263 |
| 17122942 |  |  | -0.5082 | 0.0359 |
| 17122944 |  |  | -0.6123 | 0.0161 |
| 17122946 |  |  | -0.2638 | 0.0217 |
| 17122954 |  |  | -0.2965 | 0.0312 |
| 17122960 |  |  | -0.2026 | 0.0229 |
| 17123006 |  |  | -0.1696 | 0.0202 |
| 17123008 |  |  | -0.1576 | 0.0236 |
| 17123018 |  |  | -1.1539 | 0.0461 |
| 17123092 |  |  | -0.2941 | 0.0273 |
| 17123102 |  |  | -0.3189 | 0.0029 |
| 17123124 |  |  | -0.2909 | 0.0057 |
| 17123132 |  |  | -0.2568 | 0.0365 |
| 17123190 |  |  | -0.3078 | 0.0447 |
| 17123206 |  |  | -0.6777 | 0      |
| 17123370 |  |  | -0.1471 | 0.0452 |
| 17123488 |  |  | -0.2986 | 0.02   |
| 17123540 |  |  | -0.1904 | 0.0398 |
| 17123628 |  |  | -0.4163 | 0.0043 |
| 17123638 |  |  | -0.2431 | 0.0402 |
| 17123640 |  |  | -0.2341 | 0.0379 |
| 17123642 |  |  | -0.3    | 0.0149 |
| 17123648 |  |  | -0.4416 | 0.0161 |
| 17123932 |  |  | -0.1536 | 0.0127 |
| 17123936 |  |  | -0.7211 | 0.0372 |
| 17123982 |  |  | -0.153  | 0.0241 |
| 17124008 |  |  | -0.5101 | 0.0141 |
| 17124082 |  |  | -0.243  | 0.0167 |
| 17124118 |  |  | -0.1067 | 0.0496 |
| 17124126 |  |  | -0.2264 | 0.0265 |
| 17124158 |  |  | -0.2611 | 0.0105 |
| 17124262 |  |  | -0.4918 | 0.0011 |
| 17124264 |  |  | -0.533  | 0.0005 |
| 17124316 |  |  | -0.231  | 0.0162 |
| 17124364 |  |  | -0.6184 | 0.0109 |
| 17124538 |  |  | -0.5131 | 0.0013 |
| 17124544 |  |  | -0.4475 | 0.0048 |
| 17124550 |  |  | -0.3423 | 0.0096 |
| 17124592 |  |  | -0.2935 | 0.0004 |
| 17124596 |  |  | -0.5084 | 0.0002 |
| 17124718 |  |  | -0.1533 | 0.0307 |
| 17124728 |  |  | -0.2863 | 0.0167 |
| 17124746 |  |  | -0.2495 | 0.0195 |
| 17124748 |  |  | -0.4114 | 0.0012 |
| 17124834 |  |  | -0.1647 | 0.0248 |

|          |  |  |         |        |
|----------|--|--|---------|--------|
| 17124862 |  |  | -0.137  | 0.0464 |
| 17124970 |  |  | -0.1225 | 0.0368 |
| 17125092 |  |  | -0.3233 | 0.0193 |
| 17125094 |  |  | -0.7444 | 0.0193 |
| 17125106 |  |  | -0.8639 | 0.0052 |
| 17125158 |  |  | -0.5834 | 0.007  |
| 17125194 |  |  | -0.4223 | 0.0399 |
| 17125218 |  |  | -0.6699 | 0.0146 |
| 17125290 |  |  | -0.6819 | 0.0001 |
| 17125300 |  |  | -0.5474 | 0.0083 |
| 17125344 |  |  | -0.1567 | 0.0132 |
| 17125368 |  |  | -0.1672 | 0.0046 |
| 17125388 |  |  | -0.1607 | 0.0495 |
| 17125398 |  |  | -0.224  | 0.0091 |
| 17125404 |  |  | -0.1708 | 0.0465 |
| 17125406 |  |  | -0.206  | 0.045  |
| 17125410 |  |  | -0.175  | 0.0154 |
| 17125762 |  |  | -0.4165 | 0.0485 |
| 17125830 |  |  | -0.3879 | 0.0196 |
| 17125886 |  |  | -0.4223 | 0.0066 |
| 17125934 |  |  | -0.4223 | 0.0066 |
| 17126010 |  |  | -0.2893 | 0.0399 |
| 17126018 |  |  | -0.3316 | 0.0014 |
| 17126036 |  |  | -0.6597 | 0.0208 |
| 17126040 |  |  | -0.5278 | 0.0219 |
| 17126058 |  |  | -0.5775 | 0.0026 |
| 17126092 |  |  | -0.1478 | 0.0464 |
| 17126106 |  |  | -0.6356 | 0.0012 |
| 17126130 |  |  | -0.1478 | 0.0464 |
| 17126146 |  |  | -0.6597 | 0.0208 |
| 17126150 |  |  | -0.5278 | 0.0219 |
| 17126172 |  |  | -0.69   | 0.0049 |
| 17126186 |  |  | -0.2307 | 0.022  |
| 17126208 |  |  | -0.5136 | 0.0026 |
| 17126210 |  |  | -0.6488 | 0.0152 |
| 17126212 |  |  | -0.7085 | 0.0381 |
| 17126240 |  |  | -0.5752 | 0.0295 |
| 17126242 |  |  | -0.3357 | 0.0336 |
| 17126254 |  |  | -0.7427 | 0.048  |
| 17126288 |  |  | -0.1765 | 0.0389 |

\*For the difference in expression.

**Supplemental Table 11.** Gene set enrichment analysis detail of ACC patients' cohort for genes associated with resistance and metabolism of cisplatin, etoposide and doxorubicin (dataset GSEA10927).

|    | PROBE   | GENE SYMBOL | GENE NAME                                                                               | RANK IN GENE LIST | RANK METRIC SCORE | RUNNING ES  | CORE ENRICHMENT |
|----|---------|-------------|-----------------------------------------------------------------------------------------|-------------------|-------------------|-------------|-----------------|
| 1  | GSTP1   | GSTP1       | glutathione S-transferase pi                                                            | 89                | 0.356068641       | 0.038780537 | Yes             |
| 2  | PSG4    | PSG4        | pregnancy specific beta-1-glycoprotein 4                                                | 197               | 0.304260194       | 0.070411734 | Yes             |
| 3  | RAC2    | RAC2        | ras-related C3 botulinum toxin substrate 2 (rho family, small GTP binding protein Rac2) | 209               | 0.300997138       | 0.10632141  | Yes             |
| 4  | CYP3A7  | CYP3A7      | cytochrome P450, family 3, subfamily A, polypeptide 7                                   | 309               | 0.264281571       | 0.1335014   | Yes             |
| 5  | CISH    | CISH        | cytokine inducible SH2-containing protein                                               | 324               | 0.260883242       | 0.16440798  | Yes             |
| 6  | FAT4    | FAT4        | FAT tumor suppressor homolog 4 (Drosophila)                                             | 382               | 0.249488309       | 0.19184147  | Yes             |
| 7  | MX1     | MX1         | myxovirus (influenza virus) resistance 1, interferon-inducible protein p78 (mouse)      | 426               | 0.243574277       | 0.21924044  | Yes             |
| 8  | CYP1B1  | CYP1B1      | cytochrome P450, family 1, subfamily B, polypeptide 1                                   | 446               | 0.240814269       | 0.24747363  | Yes             |
| 9  | CASP1   | CASP1       | caspase 1, apoptosis-related cysteine peptidase (interleukin 1, beta, convertase)       | 483               | 0.23523739        | 0.27420393  | Yes             |
| 10 | STMN2   | STMN2       | stathmin-like 2                                                                         | 599               | 0.217720672       | 0.29496732  | Yes             |
| 11 | G0S2    | G0S2        | G0/G1switch 2                                                                           | 615               | 0.215585738       | 0.32034054  | Yes             |
| 12 | GDF15   | GDF15       | growth differentiation factor 15                                                        | 728               | 0.202991918       | 0.3394666   | Yes             |
| 13 | ITM2A   | ITM2A       | integral membrane protein 2A                                                            | 760               | 0.199747086       | 0.3621431   | Yes             |
| 14 | PLAU    | PLAU        | plasminogen activator, urokinase                                                        | 762               | 0.199639797       | 0.38626713  | Yes             |
| 15 | NOS3    | NOS3        | nitric oxide synthase 3 (endothelial cell)                                              | 810               | 0.195634097       | 0.40766668  | Yes             |
| 16 | CYP3A5  | CYP3A5      | cytochrome P450, family 3, subfamily A, polypeptide 5                                   | 886               | 0.189096108       | 0.4269115   | Yes             |
| 17 | PTGES   | PTGES       | prostaglandin E synthase                                                                | 938               | 0.183585599       | 0.44665748  | Yes             |
| 18 | PXN     | PXN         | paxillin                                                                                | 965               | 0.181236193       | 0.46733606  | Yes             |
| 19 | HMMR    | HMMR        | hyaluronan-mediated motility receptor (RHAMM)                                           | 1035              | 0.1762411         | 0.4853165   | Yes             |
| 20 | EFEMP1  | EFEMP1      | EGF-containing fibulin-like extracellular matrix protein 1                              | 1134              | 0.16884625        | 0.5009897   | Yes             |
| 21 | TFPI2   | TFPI2       | tissue factor pathway inhibitor 2                                                       | 1362              | 0.155405194       | 0.5087553   | Yes             |
| 22 | VAV3    | VAV3        | vav 3 oncogene                                                                          | 1429              | 0.152184963       | 0.52396905  | Yes             |
| 23 | AKR1A1  | AKR1A1      | aldo-keto reductase family 1, member A1 (aldehyde reductase)                            | 1518              | 0.148295432       | 0.53764075  | Yes             |
| 24 | GJA5    | GJA5        | gap junction protein, alpha 5, 40kDa (connexin 40)                                      | 1605              | 0.143853471       | 0.550872    | Yes             |
| 25 | FBXL22  | FBXL22      | F-box and leucine-rich repeat protein 22                                                | 1643              | 0.142207608       | 0.5662894   | Yes             |
| 26 | GRN     | GRN         | granulin                                                                                | 1652              | 0.141414374       | 0.58302265  | Yes             |
| 27 | P2RY6   | P2RY6       | pyrimidinergic receptor P2Y, G-protein coupled, 6                                       | 1703              | 0.139293849       | 0.5974544   | Yes             |
| 28 | CDKN3   | CDKN3       | cyclin-dependent kinase inhibitor 3 (CDK2-associated dual specificity phosphatase)      | 1802              | 0.134949833       | 0.6090234   | Yes             |
| 29 | ARHGDIB | ARHGDIB     | Rho GDP dissociation inhibitor (GDI) beta                                               | 2174              | 0.121700726       | 0.60569763  | Yes             |
| 30 | ITGB4   | ITGB4       | integrin, beta 4                                                                        | 2180              | 0.121443547       | 0.6201588   | Yes             |
| 31 | KIF4A   | KIF4A       | kinesin family member 4A                                                                | 2235              | 0.119613469       | 0.6320129   | Yes             |
| 32 | NOS1    | NOS1        | nitric oxide synthase 1 (neuronal)                                                      | 2357              | 0.115780853       | 0.6401412   | Yes             |
| 33 | FOXJ1   | FOXJ1       | forkhead box J1                                                                         | 2394              | 0.114480384       | 0.65225005  | Yes             |
| 34 | TFPI    | TFPI        | tissue factor pathway inhibitor (lipoprotein-associated coagulation inhibitor)          | 2445              | 0.11286784        | 0.66348207  | Yes             |
| 35 | MGST1   | MGST1       | microsomal glutathione S-                                                               | 2565              | 0.109638155       | 0.67096394  | Yes             |

|    |          |          |                                                                                                                                         |       |             |            |     |
|----|----------|----------|-----------------------------------------------------------------------------------------------------------------------------------------|-------|-------------|------------|-----|
|    |          |          | transferase 1                                                                                                                           |       |             |            |     |
| 36 | CYP3A43  | CYP3A43  | cytochrome P450, family 3, subfamily A, polypeptide 43                                                                                  | 2658  | 0.106932387 | 0.67943263 | Yes |
| 37 | BUB1B    | BUB1B    | BUB1 budding uninhibited by benzimidazoles 1 homolog beta (yeast)                                                                       | 2781  | 0.104309179 | 0.68612325 | Yes |
| 38 | BMP2     | BMP2     | bone morphogenetic protein 2                                                                                                            | 2851  | 0.102603734 | 0.6951875  | Yes |
| 39 | PTGS1    | PTGS1    | prostaglandin-endoperoxide synthase 1 (prostaglandin G/H synthase and cyclooxygenase)                                                   | 3055  | 0.098132268 | 0.6971868  | Yes |
| 40 | NCAPG2   | NCAPG2   | non-SMC condensin II complex, subunit G2                                                                                                | 3459  | 0.088828593 | 0.688323   | Yes |
| 41 | JUP      | JUP      | junction plakoglobin                                                                                                                    | 3491  | 0.088271864 | 0.69750196 | Yes |
| 42 | IFITM1   | IFITM1   | interferon induced transmembrane protein 1 (9-27)                                                                                       | 3634  | 0.085442178 | 0.7009344  | Yes |
| 43 | PGD      | PGD      | phosphogluconate dehydrogenase                                                                                                          | 4004  | 0.078389779 | 0.6924619  | Yes |
| 44 | RFC4     | RFC4     | replication factor C (activator 1) 4, 37kDa                                                                                             | 4049  | 0.07772103  | 0.69973046 | Yes |
| 45 | METTL6   | METTL6   | methyltransferase like 6                                                                                                                | 4327  | 0.073377639 | 0.6951299  | Yes |
| 46 | TK1      | TK1      | thymidine kinase 1, soluble                                                                                                             | 4353  | 0.072852165 | 0.7027339  | Yes |
| 47 | CENPA    | CENPA    | centromere protein A                                                                                                                    | 4389  | 0.072300367 | 0.7097842  | Yes |
| 48 | XDH      | XDH      | xanthine dehydrogenase                                                                                                                  | 4651  | 0.06801255  | 0.70531297 | No  |
| 49 | NR1I2    | NR1I2    | nuclear receptor subfamily 1, group I, member 2                                                                                         | 5191  | 0.060610898 | 0.6864116  | No  |
| 50 | ABCC1    | ABCC1    | ATP-binding cassette, sub-family C (CFTR/MRP), member 1                                                                                 | 5875  | 0.051853582 | 0.65943956 | No  |
| 51 | CDKN1A   | CDKN1A   | cyclin-dependent kinase inhibitor 1A (p21, Cip1)                                                                                        | 6336  | 0.046626952 | 0.64269096 | No  |
| 52 | ERBB3    | ERBB3    | v-erb-b2 erythroblastic leukemia viral oncogene homolog 3 (avian)                                                                       | 6358  | 0.046307657 | 0.6472756  | No  |
| 53 | EGFR     | EGFR     | epidermal growth factor receptor (erythroblastic leukemia viral (v-erb-b) oncogene homolog, avian)                                      | 6541  | 0.044434048 | 0.64379543 | No  |
| 54 | ZDHHC3   | ZDHHC3   | zinc finger, DHHC-type containing 3                                                                                                     | 6634  | 0.043377973 | 0.64456886 | No  |
| 55 | CYP3A4   | CYP3A4   | cytochrome P450, family 3, subfamily A, polypeptide 4                                                                                   | 6800  | 0.041557617 | 0.641568   | No  |
| 56 | ABCC2    | ABCC2    | ATP-binding cassette, sub-family C (CFTR/MRP), member 2                                                                                 | 6802  | 0.041547775 | 0.64655    | No  |
| 57 | MDK      | MDK      | midkine (neurite growth-promoting factor 2)                                                                                             | 7059  | 0.039021924 | 0.63881195 | No  |
| 58 | PTGS2    | PTGS2    | prostaglandin-endoperoxide synthase 2 (prostaglandin G/H synthase and cyclooxygenase)                                                   | 7111  | 0.038446415 | 0.64098424 | No  |
| 59 | SLC22A16 | SLC22A16 | solute carrier family 22 (organic cation transporter), member 16                                                                        | 7287  | 0.036752112 | 0.63691473 | No  |
| 60 | HMGB2    | HMGB2    | high-mobility group box 2                                                                                                               | 8961  | 0.021261426 | 0.5580422  | No  |
| 61 | SNTB1    | SNTB1    | syntrophin, beta 1 (dystrophin-associated protein A1, 59kDa, basic component 1)                                                         | 9053  | 0.020535868 | 0.5560986  | No  |
| 62 | RAC1     | RAC1     | ras-related C3 botulinum toxin substrate 1 (rho family, small GTP binding protein Rac1)                                                 | 9694  | 0.015089847 | 0.5267685  | No  |
| 63 | GPX1     | GPX1     | glutathione peroxidase 1                                                                                                                | 9795  | 0.014255677 | 0.52362627 | No  |
| 64 | SOD1     | SOD1     | superoxide dismutase 1, soluble (amyotrophic lateral sclerosis 1 (adult))                                                               | 11050 | 0.00345061  | 0.46299544 | No  |
| 65 | RELA     | RELA     | v-rel reticuloendotheliosis viral oncogene homolog A, nuclear factor of kappa light polypeptide gene enhancer in B-cells 3, p65 (avian) | 13530 | -0.01753360 | 0.34443298 | No  |

**Supplemental Table 12.** Gene set enrichment analysis detail of ACC patients' cohort for genes associated with resistance and metabolism of cisplatin, etoposide and doxorubicin (dataset GSEA49278).

|    | PROBE  | GENE SYMBOL | GENE NAME                                                                               | RANK IN GENE LIST | RANK METRIC SCORE | RUNNING ES  | CORE ENRICHMENT |
|----|--------|-------------|-----------------------------------------------------------------------------------------|-------------------|-------------------|-------------|-----------------|
| 1  | CYP3A4 | CYP3A4      | cytochrome P450, family 3, subfamily A, polypeptide 4                                   | 12                | 0.728654146       | 0.068321966 | Yes             |
| 2  | CYP3A5 | CYP3A5      | cytochrome P450, family 3, subfamily A, polypeptide 5                                   | 16                | 0.705859721       | 0.13490584  | Yes             |
| 3  | GDF15  | GDF15       | growth differentiation factor 15                                                        | 52                | 0.582792163       | 0.18837525  | Yes             |
| 4  | CYP3A7 | CYP3A7      | cytochrome P450, family 3, subfamily A, polypeptide 7                                   | 94                | 0.51911968        | 0.23554817  | Yes             |
| 5  | ABCC2  | ABCC2       | ATP-binding cassette, sub-family C (CFTR/MRP), member 2                                 | 106               | 0.506755948       | 0.28294107  | Yes             |
| 6  | G0S2   | G0S2        | G0/G1switch 2                                                                           | 142               | 0.472916931       | 0.3260243   | Yes             |
| 7  | CISH   | CISH        | cytokine inducible SH2-containing protein                                               | 184               | 0.439882308       | 0.36570713  | Yes             |
| 8  | BMP2   | BMP2        | bone morphogenetic protein 2                                                            | 440               | 0.336663425       | 0.385727    | Yes             |
| 9  | PSG4   | PSG4        | pregnancy specific beta-1-glycoprotein 4                                                | 682               | 0.28498286        | 0.40150967  | Yes             |
| 10 | PXN    | PXN         | paxillin                                                                                | 738               | 0.275306404       | 0.4249876   | Yes             |
| 11 | EFEMP1 | EFEMP1      | EGF-containing fibulin-like extracellular matrix protein 1                              | 745               | 0.273793638       | 0.45059076  | Yes             |
| 12 | CASP1  | CASP1       | caspase 1, apoptosis-related cysteine peptidase (interleukin 1, beta, convertase)       | 1257              | 0.221594542       | 0.44788328  | Yes             |
| 13 | GJA5   | GJA5        | gap junction protein, alpha 5, 40kDa (connexin 40)                                      | 1334              | 0.215924338       | 0.46477592  | Yes             |
| 14 | PTGS1  | PTGS1       | prostaglandin-endoperoxide synthase 1 (prostaglandin G/H synthase and cyclooxygenase)   | 1626              | 0.196524262       | 0.4698824   | Yes             |
| 15 | ERBB3  | ERBB3       | v-erb-b2 erythroblastic leukemia viral oncogene homolog 3 (avian)                       | 1770              | 0.188211158       | 0.48105398  | Yes             |
| 16 | MDK    | MDK         | midkine (neurite growth-promoting factor 2)                                             | 2196              | 0.166640535       | 0.4771328   | Yes             |
| 17 | MX1    | MX1         | myxovirus (influenza virus) resistance 1, interferon-inducible protein p78 (mouse)      | 2240              | 0.163561359       | 0.49060327  | Yes             |
| 18 | CYP1B1 | CYP1B1      | cytochrome P450, family 1, subfamily B, polypeptide 1                                   | 2297              | 0.16127722        | 0.5032561   | Yes             |
| 19 | FAT4   | FAT4        | FAT tumor suppressor homolog 4 (Drosophila)                                             | 2455              | 0.15546748        | 0.51068443  | Yes             |
| 20 | FBXL22 | FBXL22      | F-box and leucine-rich repeat protein 22                                                | 2551              | 0.151713267       | 0.5206279   | Yes             |
| 21 | NOS3   | NOS3        | nitric oxide synthase 3 (endothelial cell)                                              | 2622              | 0.14897491        | 0.53146976  | Yes             |
| 22 | JUP    | JUP         | junction plakoglobin                                                                    | 2678              | 0.146538004       | 0.5427756   | Yes             |
| 23 | CDKN1A | CDKN1A      | cyclin-dependent kinase inhibitor 1A (p21, Cip1)                                        | 2811              | 0.141815111       | 0.5500707   | Yes             |
| 24 | XDH    | XDH         | xanthine dehydrogenase                                                                  | 3472              | 0.12233384        | 0.5310832   | No              |
| 25 | RAC2   | RAC2        | ras-related C3 botulinum toxin substrate 2 (rho family, small GTP binding protein Rac2) | 3570              | 0.119306423       | 0.53787076  | No              |
| 26 | SNTB1  | SNTB1       | syntrophin, beta 1 (dystrophin-associated protein A1, 59kDa, basic component 1)         | 3875              | 0.111522771       | 0.53434056  | No              |
| 27 | MGST1  | MGST1       | microsomal glutathione S-transferase 1                                                  | 4232              | 0.102735259       | 0.5275726   | No              |
| 28 | ITGB4  | ITGB4       | integrin, beta 4                                                                        | 4595              | 0.094891481       | 0.51978546  | No              |
| 29 | IFITM1 | IFITM1      | interferon induced transmembrane protein 1 (9-27)                                       | 4804              | 0.090650991       | 0.5187261   | No              |
| 30 | GPX1   | GPX1        | glutathione peroxidase 1                                                                | 5849              | 0.072189413       | 0.47722337  | No              |
| 31 | NOS1   | NOS1        | nitric oxide synthase 1 (neuronal)                                                      | 6083              | 0.068368115       | 0.47290045  | No              |
| 32 | GSTP1  | GSTP1       | glutathione S-transferase pi                                                            | 6467              | 0.062425952       | 0.46107236  | No              |

|    |          |          |                                                                                                                                         |       |             |             |    |
|----|----------|----------|-----------------------------------------------------------------------------------------------------------------------------------------|-------|-------------|-------------|----|
| 33 | ITM2A    | ITM2A    | integral membrane protein 2A                                                                                                            | 7089  | 0.052972339 | 0.43733367  | No |
| 34 | GRN      | GRN      | granulin                                                                                                                                | 7211  | 0.051096264 | 0.43656257  | No |
| 35 | AKR1A1   | AKR1A1   | aldo-keto reductase family 1, member A1 (aldehyde reductase)                                                                            | 7539  | 0.046557929 | 0.42582676  | No |
| 36 | TFPI     | TFPI     | tissue factor pathway inhibitor (lipoprotein-associated coagulation inhibitor)                                                          | 8481  | 0.033424243 | 0.38542747  | No |
| 37 | CYP3A43  | CYP3A43  | cytochrome P450, family 3, subfamily A, polypeptide 43                                                                                  | 8787  | 0.02930673  | 0.37407935  | No |
| 38 | METTL6   | METTL6   | methyltransferase like 6                                                                                                                | 8799  | 0.029172504 | 0.37632775  | No |
| 39 | VAV3     | VAV3     | vav 3 oncogene                                                                                                                          | 9036  | 0.026029108 | 0.36786377  | No |
| 40 | P2RY6    | P2RY6    | pyrimidinergic receptor P2Y, G-protein coupled, 6                                                                                       | 9128  | 0.024992732 | 0.36601388  | No |
| 41 | PLAU     | PLAU     | plasminogen activator, urokinase                                                                                                        | 9588  | 0.01926429  | 0.34658784  | No |
| 42 | NR1I2    | NR1I2    | nuclear receptor subfamily 1, group I, member 2                                                                                         | 9600  | 0.019127801 | 0.34788674  | No |
| 43 | ARHGDIB  | ARHGDIB  | Rho GDP dissociation inhibitor (GDI) beta                                                                                               | 9795  | 0.016882371 | 0.34050235  | No |
| 44 | RFC4     | RFC4     | replication factor C (activator 1) 4, 37kDa                                                                                             | 10513 | 0.008421433 | 0.30810857  | No |
| 45 | PTGS2    | PTGS2    | prostaglandin-endoperoxide synthase 2 (prostaglandin G/H synthase and cyclooxygenase)                                                   | 10685 | 0.006564655 | 0.30081353  | No |
| 46 | SLC22A16 | SLC22A16 | solute carrier family 22 (organic cation transporter), member 16                                                                        | 11035 | 0.002392255 | 0.2848845   | No |
| 47 | RELA     | RELA     | v-rel reticuloendotheliosis viral oncogene homolog A, nuclear factor of kappa light polypeptide gene enhancer in B-cells 3, p65 (avian) | 11049 | 0.002243968 | 0.28449485  | No |
| 48 | EGFR     | EGFR     | epidermal growth factor receptor (erythroblastic leukemia viral (v-erb-b) oncogene homolog, avian)                                      | 11514 | -0.00353764 | 0.26335075  | No |
| 49 | ZDHHC3   | ZDHHC3   | zinc finger, DHHC-type containing 3                                                                                                     | 11551 | -0.00404753 | 0.26206693  | No |
| 50 | ABCC1    | ABCC1    | ATP-binding cassette, sub-family C (CFTR/MRP), member 1                                                                                 | 12833 | -0.01979615 | 0.20464087  | No |
| 51 | RAC1     | RAC1     | ras-related C3 botulinum toxin substrate 1 (rho family, small GTP binding protein Rac1)                                                 | 13200 | -0.02453878 | 0.19001836  | No |
| 52 | SOD1     | SOD1     | superoxide dismutase 1, soluble (amyotrophic lateral sclerosis 1 (adult))                                                               | 13525 | -0.02872384 | 0.17773561  | No |
| 53 | HMGB2    | HMGB2    | high-mobility group box 2                                                                                                               | 14460 | -0.04067291 | 0.13834555  | No |
| 54 | PTGES    | PTGES    | prostaglandin E synthase                                                                                                                | 14553 | -0.04209489 | 0.138066    | No |
| 55 | FOXJ1    | FOXJ1    | forkhead box J1                                                                                                                         | 14609 | -0.04297070 | 0.13958193  | No |
| 56 | PGD      | PGD      | phosphogluconate dehydrogenase                                                                                                          | 17752 | -0.09800827 | 0.003403593 | No |
| 57 | STMN2    | STMN2    | stathmin-like 2                                                                                                                         | 18091 | -0.10570388 | 0.002250518 | No |
| 58 | TFPI2    | TFPI2    | tissue factor pathway inhibitor 2                                                                                                       | 18309 | -0.11201523 | 0.001706965 | No |
| 59 | CENPA    | CENPA    | centromere protein A                                                                                                                    | 18561 | -0.11898653 | -0.00207829 | No |
| 60 | NCAPG2   | NCAPG2   | non-SMC condensin II complex, subunit G2                                                                                                | 19660 | -0.16081953 | 0.037702788 | No |
| 61 | KIF4A    | KIF4A    | kinesin family member 4A                                                                                                                | 19790 | -0.16716087 | 0.027872976 | No |
| 62 | HMMR     | HMMR     | hyaluronan-mediated motility receptor (RHAMM)                                                                                           | 21152 | -0.30654299 | 0.061896916 | No |
| 63 | TK1      | TK1      | thymidine kinase 1, soluble                                                                                                             | 21289 | -0.34206420 | -0.03585806 | No |
| 64 | CDKN3    | CDKN3    | cyclin-dependent kinase inhibitor 3 (CDK2-assoc. dual specificity phosphatase)                                                          | 21582 | -0.56347013 | 0.0038884   | No |
