# Supplementary material
Source: PubMed Central journal article supplement (PMC4592476)
Supplement: NIHMS715462-supplement-3.pdf [file NIHMS715462-supplement-3.pdf]

## SUPPLEMENTAL TABLES

### Table of Content:

|                       |                                                                                                                                                                                                                       | <u>Page</u> |
|-----------------------|-----------------------------------------------------------------------------------------------------------------------------------------------------------------------------------------------------------------------|-------------|
| Supplemental Table 1. | Basic patients characteristics of the cohort used for serum HGF measurements.                                                                                                                                         | 3           |
| Supplemental Table 2. | Patients characteristics of second TMA.                                                                                                                                                                               | 4           |
| Supplemental Table 3. | Genes with significantly ( $P \leq 0.05$ , absolute value of log ratio $> 0.1$ ) changed expression in tumors from ACC patients (dataset GSE10927) relative to expression in normal adrenocortical tissues.           | 6           |
| Supplemental Table 4. | Biological processes Significantly ( $P < 0.05$ ) changed in tumors from ACC patients with high <i>MET</i> expression relative to tumors with low <i>MET</i> expression (dataset GSE10927) as presented in Figure 2a. | 496         |
| Supplemental Table 5. | Genes significantly ( $P \leq 0.05$ , absolute value of log ratio $> 0.1$ ) changed in tumors from ACC patients with high <i>MET</i> expression compared to those with low <i>MET</i> expression (dataset GSE10927).  | 498         |
| Supplemental Table 6. | Gene set enrichment analysis of ACC patients' cohort for genes related to cell proliferation (dataset GSE10927).                                                                                                      | 602         |

|                        |                                                                                                                                                                                                                                                              |     |
|------------------------|--------------------------------------------------------------------------------------------------------------------------------------------------------------------------------------------------------------------------------------------------------------|-----|
| Supplemental Table 7.  | Gene set enrichment analysis of ACC patients' cohort for genes related to the negative regulation of cell apoptosis (dataset GSE10927).                                                                                                                      | 613 |
| Supplemental Table 8.  | Gene set enrichment analysis of ACC patients' cohort for genes related to cell proliferation (dataset GSEA49278).                                                                                                                                            | 616 |
| Supplemental Table 9.  | Gene set enrichment analysis of ACC patients' cohort for genes related to the negative regulation of cell apoptosis (dataset GSEA49278).                                                                                                                     | 626 |
| Supplemental Table 10. | Drug metabolism-related genes with significantly ( $P \leq 0.05$ , absolute value of log ratio $> 0.1$ ) changed expression in tumors from ACC patients (dataset GSE10927) with high <i>MET</i> expression relative to those with low <i>MET</i> expression. | 629 |
| Supplemental Table 11. | Gene set enrichment analysis detail of ACC patients' cohort for genes associated with resistance and metabolism of cisplatin, etoposide and doxorubicin (dataset GSEA10927).                                                                                 | 773 |
| Supplemental Table 12. | Gene set enrichment analysis detail of ACC patients' cohort for genes associated with resistance and metabolism of cisplatin, etoposide and doxorubicin (dataset GSEA49278).                                                                                 | 775 |
